# Supplementary material for: Design of amyloidogenic peptide traps
Source: Nat Chem Biol. 2024 Mar 19;20(8):981–90. doi: 10.1038/s41589-024-01578-5 (PMC11288891; doi:10.1038/s41589-024-01578-5)
Supplement: Supplementary file 3 — Amino acid sequences of designs. [file 41589_2024_1578_MOESM3_ESM.xlsx]

## Sheet: constructs
Name	alternative name	Peptide sequence		Expressed binder sequence		Mutation peptide	Mutation binder	Amyloid target	antibiotic resistance	Comment
			Nter aa	Design	Cter aa
C34		DVRFQVRE	MHHHHHHGSENLYFQSGGS	DEEEERTFEELLRILTELVGLSEEEHKRAREELKRAAEHAKKISNRAEVFAIAAEVIAKILGVRVEFHQRGRELEVRFHGVDERQQEALVRALRILAKRLGVELHVEVSDGRREERYRVE	n/a				kan
C34.1	C34apol5-113	DVTFIVHE	MHHHHHHGSENLYFQSGGS	DEEEERTFEELLRILTELVGLSEEEHKRAREELKRAAEHAKKISNRAEVFAIAAEVIAKILGVRVEFHQRGRTLEVRFHGVDERQQEALVRALRILAKRLGVELIVEVSDGRREERYRVE	n/a	['R3T', 'Q5I', 'R7H']	['E73T', 'H105I']		kan	Increased affninity compared to parent design C34
C37		DVRFNFRE	MHHHHHHGSENLYFQSGGS	DERVEKVVRLMRKLAREGNLDEEKAKRAAEEVKRYAKEVSNRLEVARYFLQVLAELLGVRVEHHKRGRELHVRFHGVDERQVEVLVELAEAMAKAMGLELRIEVEDGRRREEREVR	n/a				kan
C37.1	C37LHD284B9	DVRFNFRE	M	PHQFYVYQIDEHVAQLIEKFVRDISRREGTEVRFEKRDGQLEIEVKNLHEAQAIAIGIYIMILLLHQSGTSEDEIAEEIAKLIKGFIEHLKREGSSYEVICEAVAAAVAAIVKALKGCGTSEDEIAEIVARVISEVIRTLKESGSSYEVICECVARIVAEIIQALKESGTSEDEIAKIVAYVLAVVVKTLQESGSDFRIIAECLVRAFKEIREALKRSGVSEREIRKILIRVVVLLMRALARLGNLDEEKAKRAAEEVTRYAQEVSNRLEVARYFLQVLAELLGVRVEHHKRGRELHVRFHGVDESQVQVLVSLAAAMAAAMGLELRIEVEDGRRRIELEVG	LEHHHHHH				kan	Fusion to the LHD284B component of the LHD hetero-oligomer system (Sahtoe et al 2022)
C104		GQRIRVRITG	M	SVTFEFENLSEEAAERVKEYVERVARKLGVEVRHRENDGRLEIEVENLDEEEALKIFEYAAHAANLDERYRRMVKAAQLAYKLFKKYDPNATIEITIDDEGIEVTVRSGDRRVELRFHDVDEEQVKEAVKEALKQLENGQKRVRVEVHG	LEHHHHHH				kan
C104.1	s1m_C104	GQRIRVRITG	MSG	SVTFEFENLSEEAAEKVKKYVKEVAEKLGVEVKVEEEEGKLKIYVENLKEEDALDIFKYAALAAELDQEYLDMVEAAIKAYHLFKEYDENATIEITIDDEGIEVKVESGDRVVTLKFKNVSKEEVEEAVKEALKQLEAGQKKVEVEVEG	GSGSHHWGSTHHHHHH				kan	C104 with surface residues outside the interface redesign to facilitate crystal structure determination
C104.2	ccc104-1	GQRICVRITG	M	SVTFIFENLSEEAAERVKEYVERVARKLGVEVRHRENDGRLEIEVENLDEEEALKIFEYAAHAANLDERYRRMVKAAQLAYKLFKKYDPNATIEICIDDEGIEVTVRSGDRRVELRFHDVDEEQVKEAVKEALKQLENGQKRVRVEVHG	SGGSHHHHHH	['R5C']	['E5I', 'T96C']		kan	C104 with disulfide bridge across interface
C104.3	ccc104-2	GQRIRVCITG	M	SVVFEFENLSEEAAERVKEYVERVARKLGVEVRHRENDGRLEIEVENLDEEEALKIFEYAAHAANLDERYRRMVKAAQLAYKLFKKYDPNATICITIDDEGIEVVVRSGDRRVELRFHDVDEEQVKEAVKEALKQLENGQKRVRVEVHG	SGGSHHHHHH	['R7C']	['T3V', 'E94C', 'T105V']		kan	C104 with disulfide bridge across interface
aviub-dslfC104-1	auccc104-1		MGSLNDIFEAQKIEWHESGGSMQIFVKTLTGKTITLEVEPSDTIENVKAKIQDKEGIPPDQQRLIFAGKQLEDGRTLSDYNIQKESTLHLVLRLRGGGSGSGS	GQRICVRITG	SGASPAAPAPASPAAPAPSAPAAGSHHHHHH				kan	avitag-ubiquitin-peptide-PASlinker-histidinetag
aviub-dslfC104-2	auccc104-2		MGSLNDIFEAQKIEWHESGGSMQIFVKTLTGKTITLEVEPSDTIENVKAKIQDKEGIPPDQQRLIFAGKQLEDGRTLSDYNIQKESTLHLVLRLRGGGSGSGS	GQRIRVCITG	SGASPAAPAPASPAAPAPSAPAAGSHHHHHH				kan	avitag-ubiquitin-peptide-PASlinker-histidinetag
GFP-104			MSKGEELFTGVVPILVELDGDVNGHKFSVRGEGEGDATNGKLTLKFICTTGKLPVPWPTLVTTLTYGVQCFARYPDHMKQHDFFKSAMPEGYVQERTISFKDDGTYKTRAEVKFEGDTLVNRIELKGIDFKEDGNILGHKLEYNFNSHNVYITADKQKNGIKANFKIRHNVEDGSVQLADHYQQNTPIGDGPVLLPDNHYLSTQSVLSKDPNEKRDHMVLLEFVTAAGITHGMDELYKGSENLYFQ	GQRIRVRITG	GSGSGSHHHHHH				kan	Nter GFP fused to peptide of C104 with Histidine tag at Cter
CH11	s9m_CH11	SQTHFEVEFKGMRIRLRNS	MSG	DTEVEVQNVSDAAADAIIAYANELAEKEGVEVETARADGVLTVRMANLSEEAAAELLEYAILAAGGSEEAARAARRFYELAVRHRVQVRVRIDDGKIEVVVEGADETVRREVEELAREIAEEQGQELTVEVR	GSGSHHWGSTHHHHHH				kan
CH15		SQTQFEYEKNGRRIRLRQS	M	PVQIQMQNVSEEAQERVKKYAKELAKRAGVEIQIRENDGELRIEIKNLDDEQTKELIKYALEVTGADRAAKVAVELAAYAHRIQPHARVRVRVRNNRVQIELQGASEEAHERLRRYAKELEERYKVEIRVHHG	LEHHHHHH				kan
CH15.1	apol12	GWLEFEYEKNGRVIRLVQG	M	PVVIQMINVSEEAQERVKKYAKELAKRAGVEIQIRENDGELRIEIKNLDDEQTKELIKYALEVTGADRAAKVAVELAAYAHRIQPHAFVRVRVRNNRVQIELQGASEEAHERLRRYAKELEERYKVEIRVHHG	SGGSHHHHHH	['S1G', 'Q2W', 'T3L', 'Q4E', 'R13V', 'R17V', 'S19G']	['Q3V', 'Q7I', 'R88F']		kan	Increased affninity compared to parent design CH15
aviub-CH15	auch15		MGSLNDIFEAQKIEWHESGGSMQIFVKTLTGKTITLEVEPSDTIENVKAKIQDKEGIPPDQQRLIFAGKQLEDGRTLSDYNIQKESTLHLVLRLRGGGSGSGS	SQTQFEYEKNGRRIRLRQS	SGASPAAPAPASPAAPAPSAPAAGSHHHHHH				kan	avitag-ubiquitin-peptide-PASlinker-histidinetag
aviub-CH15.1	auapol12		M	GWLEFEYEKNGRVIRLVQG	GSGSGSSGASPAAPAPASPAAPAPSAPAAGSMQIFVKTLTGKTITLEVEPSDTIENVKAKIQDKEGIPPDQQRLIFAGKQLEDGRTLSDYNIQKESTLHLVLRLRGGGSLNDIFEAQKIEWHESGGSHHHHHH				kan	peptide-GSlinker-PASlinker-ubiquitin-avitag-histag; linkers ensure that peptide is not sterically hindered.
CH17	hbnCH3	SSVRVEEHMNGVRIQMEYG	M	DVEVRMQNVSQEQAKRAQEYAKELAKKMGVEVHIEENDGEYRIRIHNADLEAAQRLFKYASKVAGSSEAANEMSRAAFHLAAEAQGRVRVEFKDNRVRIHMQNLSEEAQRRFKEHVERVARKYKVEFEIRSG	SGGSHHHHHH				kan
DAm_012		KLVFFAED	MSHHHHHHSG	DERVEKVVRLMRKLAREGNLDEEKAKRAAEEVKRYAKEVSNRLEVFRYFLQVLAELLGVRVEHHKRGRRLVVVFTGVDERQQEVLVELAEAMAKAAGLTLVVVVEDGRRREEREVRGS	GS			Aβ42	kan	Soluble in SEC buffer between 40-100uM protein concentration after purification
DAm_014		KLVFFAEDV	MHHHHHHGS	DERVEKVVRLMRKLAREGNLDEEKAKRAAEEVKRYAKEVSNRLEVFRYFLQVLAELLGVRVEHHKRGNRLVVIFEGVDERQQEVLVELAEAMAKAMGLQLVVVVEDGRRREEREVR	n/a			Aβ42	kan
DAm_015		GAIIGLMVG	MHHHHHHGS	DERVEKVVRLMRKLAREGNLDEEKAKRAAEEVKRYAKEVSDKLEVLRYFLQVLAELLGVRVEHHKRGNVLHVVFHGVDERQVEVLVELAEAMAKAAGLVVRFVIEDGRRREEREVR	n/a			Aβ42	kan
DAm_012_K6C		KLVFFAED	MHHHHHHGS	DERVECVVRLMRKLAREGNLDEEKAKRAAEEVKRYAKEVSNRLEVFRYFLQVLAELLGVRVEHHKRGRRLVVVFTGVDERQQEVLVELAEAMAKAAGLTLVVVVEDGRRREEREVR				Aβ42	kan	Single cysteine in binder for maleimide coupling
DAm_014_K6C		KLVFFAEDV	MHHHHHHGS	DERVECVVRLMRKLAREGNLDEEKAKRAAEEVKRYAKEVSNRLEVFRYFLQVLAELLGVRVEHHKRGNRLVVIFEGVDERQQEVLVELAEAMAKAMGLQLVVVVEDGRRREEREVR				Aβ42	kan	Single cysteine in binder for maleimide coupling
DAm_015_K6C		GAIIGLMVG	MHHHHHHGS	DERVECVVRLMRKLAREGNLDEEKAKRAAEEVKRYAKEVSDKLEVLRYFLQVLAELLGVRVEHHKRGNVLHVVFHGVDERQVEVLVELAEAMAKAAGLVVRFVIEDGRRREEREVR				Aβ42	kan	Single cysteine in binder for maleimide coupling
DTTR23		EVVFTANDS	MSG	MEAVREVVERLLELAVEAGWDLPLAVRAAEEIIRHAQENKDKLASFEYFLQKLAELAGVEVTVEREGNTLTIVFRGIAPEQREALVDLALGMAKALGIDLEVIETDGENVRRRTAK	GSHHHHHH			Transthyretin	kan
DSAA1_1		RSFFSFLGEAF	MSG	SYTYEFRDISEEARERVIEYAREVAERLGVEVEVEEAEGELRIRVKDLAAEDALEIYRYALHAEELDERALRAADAAAAAYRLFRDFDPNADIRIDLSEDGVTVTVRSGDQVATLRFVDASVEAVRAAVEEALERLAAGEKEVRVEVRG	GSHHHHHH			Serum amyloid A1	kan
2DT2		GGSVQIVYKP	MSG	SVLFHVQNVSEEAAERVKEYVERVARKLGVEVRHRENDGRLEIEVENLDAEEALKIFEYIVHALNNDERQRRMAKAAQLAYKLFRKYDPNAEIVIRLDDEGIEVTVRSGDRRVELRFHDVDEEQVKEAVKEALKQLENGQKRVRVEVHG	GSHHHHHH			Tau	kan
aviUb_n_pCH15.1	aviUb_n_papol12	GWLEFEYEKN	MGG	GWLEFEYEKN	GSGSGSSGASPAAPAPASPAAPAPSAPAAGSMQIFVKTLTGKTITLEVEPSDTIENVKAKIQDKEGIPPDQQRLIFAGKQLEDGRTLSDYNIQKESTLHLVLRLRGGGSLNDIFEAQKIEWHESGGSHHHHHH				kan	Nter strand CH15.1 peptide; peptide-GSlinker-PASlinker-Ubiquitin-avitag-histag
aviUb_c_pCH15.1	aviUb_c_papol12	GRVIRLVQG	MG	GRVIRLVQG	GSGSGSSGASPAAPAPASPAAPAPSAPAAGSMQIFVKTLTGKTITLEVEPSDTIENVKAKIQDKEGIPPDQQRLIFAGKQLEDGRTLSDYNIQKESTLHLVLRLRGGGSLNDIFEAQKIEWHESGGSHHHHHH				kan	Cter strand CH15.1 peptide; peptide-GSlinker-PASlinker-Ubiquitin-avitag-histag
In mutation numbering the first residue of each chain in the protein starts with residue number 1 i.e. E73T in "mutation binder" column means that position 73 in binder has a Glu to Thr mutation even though position 1 in chain B may be residue number 9 in the accompanying PDB.
