# Supplementary material for: Design of amyloidogenic peptide traps
Source: Nat Chem Biol. 2024 Mar 19;20(8):981–90. doi: 10.1038/s41589-024-01578-5 (PMC11288891; doi:10.1038/s41589-024-01578-5)
Supplement: Supplementary file 4 — Mammalian cell constructs. [file 41589_2024_1578_MOESM4_ESM.xlsx]

## Sheet: mammalian_cells_constructs
Name	Vector	cloning site	Ordered aa sequence	Ordered dna sequence	comment
apol12_mScarlet	pcDNA3.1(+)	NheI/XhoI	MPVVIQMINVSEEAQERVKKYAKELAKRAGVEIQIRENDGELRIEIKNLDDEQTKELIKYALEVTGADRAAKVAVELAAYAHRIQPHAFVRVRVRNNRVQIELQGASEEAHERLRRYAKELEERYKVEIRVHHGGSGGSSGGSSGGSVSKGEAVIKEFMRFKVHMEGSMNGHEFEIEGEGEGRPYEGTQTAKLKVTKGGPLPFSWDILSPQFMYGSRAFIKHPADIPDYYKQSFPEGFKWERVMNFEDGGAVTVTQDTSLEDGTLIYKVKLRGTNFPPDGPVMQKKTMGWEASTERLYPEDGVLKGDIKMALRLKDGGRYLADFKTTYKAKKPVQMPGAYNVDRKLDITSHNEDYTVVEQYERSEGRHSTGGMDELYKGS	ATGCCTGTCGTCATCCAGATGATCAACGTGTCCGAGGAAGCCCAGGAGAGAGTGAAGAAATACGCTAAGGAACTGGCTAAAAGAGCCGGCGTTGAAATCCAGATCAGAGAGAACGACGGAGAACTGAGAATCGAGATCAAAAACCTGGATGATGAGCAGACCAAGGAGCTCATCAAGTACGCCCTGGAAGTGACCGGCGCCGACAGAGCCGCCAAGGTGGCCGTGGAACTGGCCGCTTATGCCCACAGAATCCAACCTCACGCCTTTGTGCGGGTGAGAGTGCGGAACAATAGAGTGCAGATCGAGCTGCAGGGCGCCAGCGAGGAAGCACATGAACGGCTGAGGCGGTATGCCAAGGAACTTGAAGAGCGATACAAAGTGGAAATCCGGGTGCACCAC…	CH15.1-gslinker-mScarlet
PLCdPH_p-apol12	pCDNA3.1+C-eGFP	NheI/NotI	MDSGRDFLTLHGLQDDEDLQALLKGSQLLKVKSSSWRRERFYKLQEDCKTIWQESRKVMRTPESQLFSIEDIQEVRMGHRTEGLEKFARDVPEDRCFSIVFKDQRNTLDLIAPSPADAQHWVLGLHKIIHHSGSMDQRQKLQHWIHSCLRKADKNKDNKMSFKELQNFLKDPPVATSGGSSGGSSGGSGWLEFEYEKNGRVIRLVQGSGGSSGGSSGGSGG	ATGGACAGCGGAAGAGACTTCCTTACACTGCACGGCCTGCAGGACGACGAGGACCTGCAGGCCCTGCTGAAGGGCTCCCAGCTGCTGAAGGTGAAGAGCAGCAGCTGGCGGCGGGAAAGATTCTACAAGCTGCAGGAGGATTGCAAGACCATCTGGCAGGAAAGCAGAAAAGTGATGAGGACCCCTGAGAGCCAGCTGTTCAGCATCGAGGACATCCAGGAAGTGCGGATGGGCCACCGCACCGAGGGCCTGGAGAAGTTCGCCAGAGATGTGCCAGAGGATAGATGCTTTAGCATTGTCTTTAAGGACCAGCGGAACACCCTGGACCTGATCGCCCCTAGCCCTGCTGACGCTCAGCACTGGGTGCTGGGCCTGCACAAGATCATCCACCACAGCGGC…	PLC pH domain - gslinker - peptide CH15.1 - gslinker; in frame with eGFP from vector at cter
PLCdPH_p-apol12F5K-L16K	pCDNA3.1+C-eGFP	NheI/NotI	MDSGRDFLTLHGLQDDEDLQALLKGSQLLKVKSSSWRRERFYKLQEDCKTIWQESRKVMRTPESQLFSIEDIQEVRMGHRTEGLEKFARDVPEDRCFSIVFKDQRNTLDLIAPSPADAQHWVLGLHKIIHHSGSMDQRQKLQHWIHSCLRKADKNKDNKMSFKELQNFLKDPPVATSGGSSGGSSGGSGWLEKEYEKNGRVIRKVQGSGGSSGGSSGGSGG	ATGGACAGCGGAAGAGACTTCCTGACCCTCCACGGCCTGCAGGACGACGAGGATCTGCAGGCCCTGCTGAAAGGCTCTCAGCTGCTGAAGGTGAAGAGCAGCAGCTGGCGGCGGGAAAGATTCTACAAGCTGCAAGAAGATTGCAAGACCATCTGGCAGGAGAGCAGAAAAGTGATGCGGACACCTGAGTCCCAGCTGTTTTCTATCGAGGACATCCAGGAGGTGCGGATGGGCCACAGAACCGAGGGCCTTGAAAAGTTCGCCAGAGATGTGCCAGAGGACAGGTGTTTTAGCATTGTGTTCAAGGACCAGAGAAATACACTGGACCTGATCGCTCCTAGCCCTGCTGATGCCCAGCACTGGGTCCTGGGCCTGCATAAGATCATCCACCACAGCGGA…	PLC pH domain - gslinker - mutant peptide CH15.1 - gslinker; in frame with eGFP from vector at cter
DF0_p-apol12	pCDNA3.1+C-HA	NheI/XbaI	MTWQWVLINISEEARQLIEKAVRAISKKEGTEVHFEKDDGVLHIRVKNLHEKRAREIHKVAKLILEVAAAERIVRERPGSNLAKKALEIILRAAEELAKADVDAALEAAVRAAEKVVREQPGSNLAKKALEIILRAAEELAKLPDPEALKEAVKAAEKVVREQPGSNLAKKALEIILRAAAALANLPDPESRKEADKAADKVRREQPGSELAVVAAIISAVARMGVKMELHPSGNEVKVVIKGLHIKQQRQLYRDVREAAKKAGVEVEIEVEGDTVTIVVRGGGSSGGSSGGSGWLEFEYEKNGRVIRLVQG	ATGACCTGGCAGTGGGTCCTGATCAACATCTCCGAGGAAGCCAGACAACTGATCGAGAAGGCCGTGCGGGCTATCAGCAAGAAAGAGGGTACAGAGGTGCACTTCGAGAAGGACGACGGCGTGCTGCATATCCGGGTGAAGAACCTGCACGAGAAAAGAGCCAGAGAGATCCACAAGGTGGCCAAGCTGATCCTGGAGGTGGCCGCCGCCGAGAGAATCGTTCGGGAAAGACCTGGCAGCAACCTGGCCAAAAAGGCCCTGGAAATCATTCTGAGAGCCGCCGAAGAGCTGGCCAAGGCCGATGTGGACGCCGCTCTGGAAGCCGCCGTGCGGGCCGCCGAGAAAGTGGTCAGAGAACAGCCAGGCAGCAACCTGGCTAAAAAGGCCCTGGAAATCATC…	pseudoC2LHD-gslinker-peptide CH15.1; see design "DF0" Sahtoe et al 2022 https://www.science.org/doi/10.1126/science.abj7662
DF0_p-apol12F5K-L16K	pCDNA3.1+C-HA	NheI/XbaI	MTWQWVLINISEEARQLIEKAVRAISKKEGTEVHFEKDDGVLHIRVKNLHEKRAREIHKVAKLILEVAAAERIVRERPGSNLAKKALEIILRAAEELAKADVDAALEAAVRAAEKVVREQPGSNLAKKALEIILRAAEELAKLPDPEALKEAVKAAEKVVREQPGSNLAKKALEIILRAAAALANLPDPESRKEADKAADKVRREQPGSELAVVAAIISAVARMGVKMELHPSGNEVKVVIKGLHIKQQRQLYRDVREAAKKAGVEVEIEVEGDTVTIVVRGGGSSGGSSGGSGWLEKEYEKNGRVIRKVQG		pseudoC2LHD-gslinker-mutant peptide CH15.1; see design "DF0" Sahtoe et al 2022 https://www.science.org/doi/10.1126/science.abj7662
LHD101B-C5					LHD101B-C5-GFP is from Sahtoe et al 2022 https://www.science.org/doi/10.1126/science.abj7662
