# Supplementary material for: Design of amyloidogenic peptide traps
Source: Nat Chem Biol. 2024 Mar 19;20(8):981–90. doi: 10.1038/s41589-024-01578-5 (PMC11288891; doi:10.1038/s41589-024-01578-5)
Supplement: Supplementary file 5 — Source data for supplementary figures. [file 41589_2024_1578_MOESM5_ESM.xlsx]

## Sheet: fig_s2_Fig. S2a
C34apo	wavelength	CD	C34holo	wavelength.1	CD.1
0	260	178.778	0	260	75.0794
1	259	162.458	1	259	82.4399
2	258	146.211	2	258	110.415
3	257	184.425	3	257	87.9339
4	256	93.3137	4	256	71.4441
5	255	149.804	5	255	31.6663
6	254	324.119	6	254	51.864
7	253	194.424	7	253	99.3692
8	252	145.047	8	252	76.6757
9	251	74.6423	9	251	-32.4124
10	250	12.9754	10	250	43.833
11	249	57.0424	11	249	14.1164
12	248	0.694968	12	248	-145.779
13	247	-89.8945	13	247	-230.239
14	246	-141.373	14	246	-274.992
15	245	-376.027	15	245	-387.502
16	244	-471.875	16	244	-509.735
17	243	-598.066	17	243	-780.59
18	242	-895.528	18	242	-1060.36
19	241	-1328.65	19	241	-1329.3
20	240	-1857.43	20	240	-1710.62
21	239	-2436.73	21	239	-2257.84
22	238	-2999.25	22	238	-2866.57
23	237	-3709.78	23	237	-3460.06
24	236	-4496.48	24	236	-4215.19
25	235	-5309.75	25	235	-5242.86
26	234	-6289.65	26	234	-6114.78
27	233	-7585.61	27	233	-7209.22
28	232	-8836.69	28	232	-8402.83
29	231	-9888.65	29	231	-9389.57
30	230	-11152	30	230	-10643.5
31	229	-12189.9	31	229	-11910.4
32	228	-13454.5	32	228	-12899.9
33	227	-14494.7	33	227	-14070.6
34	226	-15391.5	34	226	-14894
35	225	-16032.3	35	225	-15596.7
36	224	-16807	36	224	-16197.9
37	223	-17247.1	37	223	-16524.1
38	222	-17357.2	38	222	-16740.6
39	221	-17635.1	39	221	-17050.3
40	220	-17869.1	40	220	-17157.6
41	219	-17717.8	41	219	-17103.2
42	218	-17513.7	42	218	-17081.8
43	217	-17692.3	43	217	-16961.7
44	216	-17751.3	44	216	-16954.2
45	215	-18020	45	215	-16992.8
46	214	-18212.3	46	214	-17109.6
47	213	-18256	47	213	-17440.2
48	212	-18839.8	48	212	-17815.1
49	211	-19469.2	49	211	-18663.3
50	210	-20286.9	50	210	-19347.4
51	209	-21040.6	51	209	-19963
52	208	-21205.7	52	208	-20347.3
53	207	-20161.6	53	207	-19469.4
54	206	-18524.1	54	206	-18164.9
55	205	-15353.1	55	205	-15653.8
56	204	-12511	56	204	-11965.6
57	203	-8629.14	57	203	-7579.1
58	202	-3922.27	58	202	-3630.94
59	201	1367.32	59	201	529.917
60	200	8583.33	60	200	6491.04
61	199	15217.6	61	199	13185.3
62	198	19403	62	198	19894.8
63	197	20505.8	63	197	23588.3
64	196	23530.9	64	196	22106.8
65	195	17605	65	195	20194.3
66	194	15075.9	66	194	13989.4
67	193	10237.5	67	193	9944.18
68	192	11020.2	68	192	7166.48
69	191	6188.57	69	191	2692.69
70	190	2543.82	70	190	1891.67

## Sheet: fig_s2_Fig. S2b
C37apo	wavelength	CD	C37holo	wavelength.1	CD.1
0	260	138.123	0	260	146.821
1	259	167.501	1	259	201.856
2	258	102.35	2	258	129.518
3	257	50.0778	3	257	155.402
4	256	58.2175	4	256	168.26
5	255	109.107	5	255	114.124
6	254	141.75	6	254	102.626
7	253	69.081	7	253	55.8218
8	252	54.8948	8	252	116.596
9	251	60.5389	9	251	71.9572
10	250	86.8929	10	250	96.9903
11	249	4.28234	11	249	95.4416
12	248	-15.4054	12	248	103.108
13	247	-70.081	13	247	45.7292
14	246	-110.991	14	246	63.4431
15	245	-155.916	15	245	50.9163
16	244	-246.877	16	244	-126.624
17	243	-372.458	17	243	-237.978
18	242	-467.683	18	242	-320.018
19	241	-598.75	19	241	-463.754
20	240	-813.313	20	240	-722.574
21	239	-1069.86	21	239	-888.568
22	238	-1367.86	22	238	-1134.81
23	237	-1605.83	23	237	-1468.12
24	236	-1957.4	24	236	-1770.52
25	235	-2387.48	25	235	-2216.05
26	234	-2948.85	26	234	-2567.05
27	233	-3435.77	27	233	-3118.81
28	232	-3994.8	28	232	-3585.61
29	231	-4538.53	29	231	-4051.19
30	230	-5063.06	30	230	-4553.42
31	229	-5758.69	31	229	-5086.94
32	228	-6164.48	32	228	-5639.43
33	227	-6517.26	33	227	-6017.49
34	226	-6862.3	34	226	-6365.4
35	225	-7221.55	35	225	-6729.99
36	224	-7557.74	36	224	-6868.53
37	223	-7753.81	37	223	-7049.4
38	222	-7817.58	38	222	-7209.23
39	221	-7762.18	39	221	-7232.22
40	220	-7803.69	40	220	-7173.1
41	219	-7792.18	41	219	-7298.66
42	218	-7681.11	42	218	-7194.61
43	217	-7692.94	43	217	-7157.92
44	216	-7622.02	44	216	-7241.48
45	215	-7430.91	45	215	-7132.59
46	214	-7509.8	46	214	-7161.24
47	213	-7662.06	47	213	-7287.39
48	212	-7757.54	48	212	-7265.44
49	211	-7842.22	49	211	-7477.23
50	210	-8155.83	50	210	-7875.82
51	209	-8376.9	51	209	-8174.7
52	208	-8368.29	52	208	-8063.28
53	207	-8010.99	53	207	-7631.29
54	206	-6982.1	54	206	-6757.96
55	205	-5418.53	55	205	-5565.07
56	204	-4008.85	56	204	-4042.6
57	203	-2258.48	57	203	-2357.08
58	202	-393.17	58	202	-578.259
59	201	2060.25	59	201	1548.24
60	200	4431.51	60	200	4432.7
61	199	7431.27	61	199	6814.95
62	198	10390.2	62	198	9889.17
63	197	13020.5	63	197	12549.4
64	196	14672.2	64	196	13746.4
65	195	16061	65	195	16356.7
66	194	15992.1	66	194	15926.6
67	193	15065.2	67	193	13344.2
68	192	12298.7	68	192	10828.4
69	191	6910.44	69	191	7588.17
70	190	2079.57	70	190	4296.73

## Sheet: fig_s2_Fig. S2c
C104apo	wavelength	CD	C104holo	wavelength.1	CD.1
0	260	126.202	0	260	141.683
1	259	129.023	1	259	152.753
2	258	152.062	2	258	120.267
3	257	107.281	3	257	106.658
4	256	101.66	4	256	-15.0195
5	255	26.0762	5	255	94.9758
6	254	53.1487	6	254	115.575
7	253	163.525	7	253	36.2472
8	252	110.822	8	252	41.5707
9	251	104.654	9	251	9.50707
10	250	35.6178	10	250	91.6101
11	249	21.3687	11	249	44.4888
12	248	-51.8256	12	248	-69.3188
13	247	-156.28	13	247	-72.1116
14	246	-233.273	14	246	-196.061
15	245	-322.419	15	245	-318.905
16	244	-497.508	16	244	-489.803
17	243	-736.657	17	243	-673.248
18	242	-932.892	18	242	-844.453
19	241	-1291.27	19	241	-1273.41
20	240	-1675.68	20	240	-1623.93
21	239	-2234.19	21	239	-2097.2
22	238	-2729.07	22	238	-2537.81
23	237	-3340.74	23	237	-3184.9
24	236	-4016.73	24	236	-3867.6
25	235	-4931.21	25	235	-4672.54
26	234	-5835.25	26	234	-5494.38
27	233	-7117.56	27	233	-6504.84
28	232	-8181.8	28	232	-7681.21
29	231	-9145.09	29	231	-8651.26
30	230	-10404	30	230	-9805.17
31	229	-11589	31	229	-11096.7
32	228	-12657.3	32	228	-12056.2
33	227	-13817.3	33	227	-12937.7
34	226	-14879.8	34	226	-13858.7
35	225	-15648.7	35	225	-14694.9
36	224	-16208.9	36	224	-15523.1
37	223	-16702	37	223	-16102.2
38	222	-17360.9	38	222	-16387
39	221	-17773.4	39	221	-16683.9
40	220	-17911.9	40	220	-16915.3
41	219	-18062.6	41	219	-17241.3
42	218	-18199	42	218	-17142.1
43	217	-18284.8	43	217	-17094.6
44	216	-18159.9	44	216	-17019.8
45	215	-17994.5	45	215	-17072.6
46	214	-18106.4	46	214	-17245.4
47	213	-18268.5	47	213	-16976
48	212	-18211	48	212	-17076.2
49	211	-18365.7	49	211	-17205.9
50	210	-18708.6	50	210	-17354.1
51	209	-18841.8	51	209	-17201.2
52	208	-18316.7	52	208	-16980.6
53	207	-17156.4	53	207	-15945.3
54	206	-15143.4	54	206	-13565.9
55	205	-11497.4	55	205	-9908.78
56	204	-8391.06	56	204	-6857.22
57	203	-3149.36	57	203	-2022.82
58	202	2142.93	58	202	3184.83
59	201	8003.84	59	201	9061.09
60	200	14707.9	60	200	13290
61	199	19736.9	61	199	20311.2
62	198	21503	62	198	22989
63	197	22794.5	63	197	21292.5
64	196	22013.5	64	196	18584.4
65	195	17163.6	65	195	11098.8
66	194	7740.94	66	194	5643.08
67	193	4169.26	67	193	2212.57
68	192	-598.623	68	192	1742.76
69	191	-2196.25	69	191	2614.76
70	190	1075.25	70	190	3963.88

## Sheet: fig_s2_Fig. S2d
CH11apo	wavelength	CD	CH11holo	wavelength.1	CD.1
0	260	153.389	0	260	109.26
1	259	102.4	1	259	88.4349
2	258	113.174	2	258	76.6997
3	257	156.456	3	257	66.586
4	256	80.2759	4	256	111.971
5	255	24.3926	5	255	84.7242
6	254	-3.31786	6	254	96.4464
7	253	68.855	7	253	67.8555
8	252	54.5089	8	252	141.236
9	251	60.6588	9	251	163.731
10	250	-18.0735	10	250	85.7556
11	249	-23.6402	11	249	5.48892
12	248	-113.874	12	248	-20.3453
13	247	-179.199	13	247	-61.0949
14	246	-233.064	14	246	-99.4081
15	245	-242.277	15	245	-232.078
16	244	-359.278	16	244	-396.207
17	243	-670.418	17	243	-607.507
18	242	-964.385	18	242	-901.174
19	241	-1315.63	19	241	-1151.64
20	240	-1713.23	20	240	-1524.1
21	239	-2221.61	21	239	-2007.84
22	238	-2807.76	22	238	-2502.12
23	237	-3537.72	23	237	-3185.79
24	236	-4274.42	24	236	-3899.31
25	235	-5403.43	25	235	-4760.25
26	234	-6442.21	26	234	-5641.1
27	233	-7516.85	27	233	-6758.13
28	232	-8837.02	28	232	-7842.72
29	231	-10040.6	29	231	-8872.29
30	230	-11452.5	30	230	-10102.8
31	229	-12795.7	31	229	-11365.5
32	228	-14099	32	228	-12486.9
33	227	-15296.9	33	227	-13522.3
34	226	-16352.9	34	226	-14460.2
35	225	-17301.8	35	225	-15391.3
36	224	-18050.5	36	224	-16147.9
37	223	-18486.7	37	223	-16590.2
38	222	-19040.5	38	222	-16915.9
39	221	-19286.4	39	221	-17301.4
40	220	-19415.4	40	220	-17439.2
41	219	-19520.9	41	219	-17403.9
42	218	-19266	42	218	-17173.8
43	217	-19166.8	43	217	-17165.5
44	216	-19068.4	44	216	-17128.6
45	215	-18747.8	45	215	-17041.4
46	214	-18721.5	46	214	-16675.9
47	213	-18821	47	213	-16452.2
48	212	-18435.3	48	212	-16386.3
49	211	-18414.6	49	211	-16397.5
50	210	-18515.6	50	210	-16471.2
51	209	-18416.9	51	209	-16504.1
52	208	-17845.7	52	208	-15979.3
53	207	-16413.7	53	207	-14881.8
54	206	-14280	54	206	-12327.5
55	205	-10934.6	55	205	-9406.28
56	204	-6996.79	56	204	-5967.76
57	203	-2453.53	57	203	-2185.2
58	202	2098.18	58	202	2262.02
59	201	8057.38	59	201	8285.78
60	200	13574.9	60	200	11816.3
61	199	19877.2	61	199	14920.5
62	198	21955	62	198	14751.4
63	197	20368.5	63	197	15013.8
64	196	14805.1	64	196	8575.86
65	195	12502.4	65	195	5632.71
66	194	7572.82	66	194	5505.22
67	193	1726.53	67	193	3599.93
68	192	2321.69	68	192	1174.57
69	191	2592.51	69	191	2076.89
70	190	277.558	70	190	422.92

## Sheet: fig_s2_Fig. S2e
C34	wavelength	25	35	45	55	65	75	85	95
0	260	80.568	214.048	122.862	50.02	18.185	80.5903	-12.8751	35.2201
1	259	142.621	110.462	188.947	67.2264	68.3076	74.6243	-3.70093	81.2097
2	258	212.171	157.791	200.077	6.27294	110.751	172.152	85.9051	37.2223
3	257	106.858	123.548	179.716	29.0578	50.4856	186.022	97.4558	96.0699
4	256	46.8345	54.8779	134.231	114.223	92.5416	59.5548	60.7358	129.333
5	255	-0.20767	58.6791	93.1376	57.5049	179.675	24.0464	92.4917	47.0567
6	254	73.8473	140.899	81.2003	-15.7848	41.7162	17.4141	77.2559	-31.1194
7	253	169.679	142.629	66.2785	18.1716	-37.4737	-15.8032	85.3148	24.5777
8	252	116.562	176.53	85.8651	-12.7559	41.1686	-74.1289	-24.1485	23.9994
9	251	92.4879	62.3874	22.3128	-23.4663	-14.6076	-56.1954	-147.083	-48.7007
10	250	5.03356	20.6311	-50.8076	-116.52	-190.964	-22.8913	-108.418	-114.984
11	249	-36.7178	-1.91533	-48.5404	-43.8144	-174.192	-82.9974	-167.544	-192.009
12	248	-61.3768	-17.142	-127.214	-193.812	-141.687	-166.791	-229.031	-351.091
13	247	-236.101	-132.298	-268.301	-223.452	-267.218	-208.469	-385.038	-350.611
14	246	-272.132	-239.012	-468.866	-346.13	-432.638	-367.605	-384.921	-452.298
15	245	-323.835	-408.522	-563.443	-527.793	-486.353	-601.308	-589.58	-632.37
16	244	-473.299	-558.186	-578.658	-687.147	-759.116	-693.923	-852.4	-955.544
17	243	-731.992	-825.514	-925.333	-932.661	-995.208	-1010.42	-1132.66	-1177.41
18	242	-943.794	-1102.6	-1210.8	-1072.65	-1317.31	-1338.99	-1424.12	-1405.15
19	241	-1389.43	-1394.98	-1514.87	-1424.29	-1673.45	-1637.07	-1775.8	-1800.12
20	240	-1796.39	-1767.24	-1845.28	-1874.69	-1994.75	-2053.85	-2102.79	-2246.97
21	239	-2216.24	-2272.61	-2350.51	-2497.66	-2505.71	-2637.97	-2627.49	-2796.14
22	238	-2760.23	-2885.08	-2879.95	-2937.8	-3001.34	-3243.6	-3212.29	-3312.88
23	237	-3582.39	-3574.55	-3581.4	-3625.89	-3721.88	-3797.92	-3848.49	-4002.72
24	236	-4260.73	-4376.19	-4314.25	-4385.9	-4472	-4513.23	-4553.85	-4756.92
25	235	-5213.87	-5272.52	-5252.38	-5279.97	-5336.02	-5421.16	-5323.51	-5543.84
26	234	-6132.46	-6114.93	-6216.82	-6182.54	-6274.87	-6324.19	-6142.48	-6340.63
27	233	-7194.94	-7191.65	-7204.08	-7191.42	-7226.53	-7154.46	-7115.38	-7162.85
28	232	-8302.57	-8299.7	-8348.68	-8195.43	-8222.3	-8028.23	-8058.39	-8064.7
29	231	-9448.15	-9361.11	-9328.19	-9166.52	-9193.73	-8925.62	-8886.17	-8916.52
30	230	-10733.5	-10528.2	-10447.1	-10275.2	-10210.9	-10009.3	-9701.78	-9836.47
31	229	-11849	-11573.8	-11498.2	-11283.8	-11244.8	-10932	-10590	-10628.3
32	228	-12944	-12761.7	-12424.3	-12285.8	-12097.9	-11810.4	-11444	-11430
33	227	-14059.2	-13700.5	-13526.6	-13185.8	-13080.8	-12798	-12244.3	-12253
34	226	-14887.8	-14476.7	-14292.8	-13839.7	-13730	-13432.3	-12874.1	-12819.6
35	225	-15575.2	-15104.3	-14948.3	-14520.5	-14242.7	-13955.1	-13468.4	-13402.8
36	224	-16103.6	-15859.9	-15441.5	-15040.7	-14692.1	-14454.3	-13989.6	-14021.3
37	223	-16597.8	-16282.4	-15922.4	-15395.4	-15200.3	-14732.1	-14380.3	-14281.8
38	222	-17032.5	-16529.6	-16118	-15725.3	-15428.3	-14901.4	-14689.3	-14463.9
39	221	-17005.9	-16556.7	-16185.1	-15955.3	-15648.9	-15222.8	-14789.2	-14709.8
40	220	-17061	-16601.8	-16338	-15957.1	-15813.2	-15354.1	-14691.5	-14887.3
41	219	-17021.4	-16733.3	-16417.2	-16109.4	-15713.7	-15238.5	-14822.3	-14923.4
42	218	-17025.4	-16690.5	-16245.7	-16258	-15869.5	-15335.5	-14928.9	-14931.3
43	217	-17132.4	-16633.7	-16326.6	-16225	-15878.8	-15559.1	-14991.7	-15162.6
44	216	-17065.5	-16838.1	-16525.7	-16287.3	-15905.8	-15519	-15062.6	-15106.5
45	215	-17172.2	-16884.9	-16663.6	-16328.8	-16081.8	-15485.7	-15281.7	-15332.3
46	214	-17451.4	-16836.2	-16795	-16470.8	-16261.1	-15822.3	-15583.3	-15460.9
47	213	-17634.2	-17096.4	-17033.2	-16789.6	-16569.3	-16165.9	-16079.7	-15902.9
48	212	-18003.1	-17919.4	-17728.9	-17398.6	-17125.7	-16650.6	-16380.9	-16647.4
49	211	-18565.2	-18648.8	-18287.3	-17886.2	-17455.7	-17134.5	-17130.8	-17124.7
50	210	-19218.6	-19042	-18863.4	-18620.3	-18265.9	-18147.4	-17810.6	-17840.5
51	209	-19901.6	-19539.9	-19363.8	-19295.9	-19172.8	-18980.1	-18445.8	-18363.4
52	208	-20264.1	-19796.1	-19764	-19293.7	-19550.8	-18960.2	-18514.4	-18325.3
53	207	-19498.7	-19340.8	-19418.7	-18627.6	-18322.2	-18085	-17620.9	-17738.3
54	206	-17843.4	-17705.5	-17401.9	-17462.5	-16737.9	-16276.5	-15940.7	-15963
55	205	-15004.8	-15245.6	-14619.2	-15141	-14317.7	-13913.2	-13783.2	-13481.2
56	204	-12191.1	-11938.1	-11630.6	-12048.3	-11731.8	-11087.5	-10887.4	-10381.9
57	203	-8281.25	-7688.51	-7828.68	-7154.23	-8458.47	-7342.14	-6527.89	-6248.45
58	202	-3701.99	-3913.23	-4080.42	-3766.32	-3914.29	-4110.24	-3216.95	-3568.74
59	201	1992.53	1538.46	1348.76	1607.29	1630.11	1762.21	937.691	1446.36
60	200	6984.62	7512.55	7170.07	8506.61	7218.14	7840.21	7602.76	8041.95

## Sheet: fig_s2_Fig. S2f
C37	wavelength	25	35	45	55	65	75	85	95
0	260	173.949	120.871	9.05889	-57.2187	86.0492	149.591	1.60563	60.3016
1	259	94.6504	188.727	-21.4169	18.0894	93.0032	3.02869	78.4321	92.7897
2	258	146.453	225	28.6966	71.3492	128.89	49.3583	100.852	58.6544
3	257	247.108	115.489	-21.2999	-8.02016	90.1044	51.5564	113.294	14.3932
4	256	82.1083	138.635	-70.5651	-5.28552	104.581	139.488	138.396	87.6222
5	255	147.47	80.4754	-65.4504	23.298	34.1441	86.2845	99.3798	70.1845
6	254	172.324	107.155	-150.929	-64.273	3.59288	-6.67155	170.257	62.3802
7	253	139.208	86.0556	-91.9437	28.2898	38.5214	3.83198	161.204	116.97
8	252	193.321	112.542	-51.1206	134.742	28.9399	-11.3942	93.7579	36.9172
9	251	208.474	129.472	-104.331	103.326	75.1853	10.7896	78.7111	-70.5532
10	250	93.8405	129.484	-140.085	-0.69132	10.997	86.6131	53.7988	-98.7234
11	249	100.212	157.117	-156.224	-81.4159	-23.4319	-48.5611	-97.3484	-90.2877
12	248	199.425	152.402	-183.032	-23.6483	23.6633	-13.6083	-56.8964	-106.623
13	247	159.619	37.0418	-221.416	-21.34	-48.1079	7.55337	-18.0637	-91.2766
14	246	83.0357	20.8818	-315.04	-182.267	-80.2079	-110.371	-133.62	-197.464
15	245	31.6311	-82.2504	-329.73	-234.028	-192.638	-141.069	-193.975	-207.693
16	244	-143.613	-149.145	-417.282	-315.381	-225.059	-150.671	-229.451	-333.969
17	243	-279.431	-275.452	-546.817	-409.687	-364.526	-342.87	-286.327	-426.095
18	242	-354.358	-394.995	-594.865	-520.516	-468.365	-503.103	-512.024	-562.619
19	241	-602.21	-586.552	-810.587	-625.786	-683.333	-575.242	-650.294	-830.448
20	240	-610.341	-773.393	-1000.82	-758.702	-940.794	-745.992	-899.679	-1000.77
21	239	-863.98	-913.714	-1169.63	-1030.44	-1097.43	-1128.83	-1096.92	-1171.56
22	238	-1206.81	-1183.96	-1441.08	-1386.66	-1439.49	-1404.18	-1360.16	-1342.42
23	237	-1456.41	-1579.53	-1825.65	-1724.28	-1619.25	-1660.38	-1657.23	-1586.04
24	236	-1883.43	-1987.31	-2137.62	-2001.45	-1877.38	-1958.71	-2002.43	-1970.66
25	235	-2262.66	-2326.79	-2479.44	-2344.39	-2443.07	-2342.75	-2425.9	-2312
26	234	-2827.52	-2651.12	-2957.19	-2870.99	-2814.59	-2647.87	-2671.32	-2710.4
27	233	-3459.62	-3145.83	-3551.69	-3324.03	-3283.12	-3052.65	-3076.34	-3111.95
28	232	-3870.64	-3714.48	-3927.44	-3686.18	-3733.69	-3644.33	-3549.56	-3467.95
29	231	-4368.45	-4214.68	-4358.06	-4139.17	-4156.9	-3980.75	-3904.21	-3855.59
30	230	-4880.36	-4736.79	-4847.22	-4699.52	-4632.26	-4440.44	-4323.77	-4234.4
31	229	-5410.32	-5165.4	-5322.86	-5154.52	-5100.12	-4877.98	-4747.86	-4587.14
32	228	-5997.5	-5636.47	-5700.95	-5517.26	-5527.66	-5265.67	-5200.79	-4980.52
33	227	-6537.26	-6221.31	-6236.19	-5962.62	-5980.79	-5631.35	-5445.32	-5253.77
34	226	-6812.86	-6660.75	-6637.3	-6185.79	-6237.34	-5937.82	-5787.62	-5614.13
35	225	-7241.07	-7007.34	-6784.37	-6473.21	-6362.7	-6298.21	-6085	-5953.81
36	224	-7595.91	-7165.91	-7056.9	-6845.08	-6616.79	-6504.96	-6220.56	-6084.21
37	223	-7658.97	-7377.06	-7205.87	-7013.73	-6942.74	-6586.35	-6371.39	-6097.62
38	222	-7682.7	-7352.74	-7254.96	-7019.88	-7016.23	-6704.44	-6545.04	-6234.6
39	221	-7809.92	-7472.78	-7355.63	-7083.21	-7042.94	-6821.39	-6575.67	-6367.38
40	220	-7829.56	-7588.57	-7439.96	-7163.17	-7083.37	-6786.55	-6439.92	-6440.32
41	219	-7709.72	-7588.89	-7386.87	-7160.2	-6984.4	-6766.15	-6576.83	-6400.04
42	218	-7720.63	-7511.75	-7222.14	-7109.33	-7079.56	-6672.26	-6540.79	-6302.58
43	217	-7433.17	-7304.8	-7276.03	-7001.27	-7012.58	-6702.9	-6532.02	-6308.33
44	216	-7492.82	-7317.98	-7355.63	-6940.56	-6962.26	-6853.93	-6532.18	-6330.52
45	215	-7490.24	-7312.62	-7329.6	-7081.43	-7022.98	-6714.09	-6747.58	-6284.64
46	214	-7473.73	-7471.55	-7345.04	-7097.14	-6976.9	-6790.44	-6713.45	-6311.83
47	213	-7796.35	-7459.29	-7373.13	-7086.35	-7049.88	-6845.56	-6723.81	-6470.95
48	212	-7796.23	-7359.09	-7394.4	-7299.68	-7172.26	-7162.78	-6911.87	-6736.19
49	211	-7979.01	-7622.42	-7525.75	-7365.44	-7354.05	-7293.06	-7018.02	-6798.45
50	210	-8234.96	-7871.87	-7952.18	-7584.48	-7730.95	-7538.89	-7240.24	-6912.5
51	209	-8430.6	-8295.56	-8238.77	-7702.7	-7953.93	-7574.92	-7647.38	-7111.43
52	208	-8384.4	-8122.18	-8089.29	-7840.56	-7747.78	-7501.94	-7584.72	-7013.69
53	207	-7948.21	-7778.17	-7796.31	-7522.66	-7436.98	-7187.78	-6994.56	-6739.13
54	206	-7156.59	-7147.38	-6720	-6646.35	-6882.34	-6374.29	-6168.13	-6028.37
55	205	-5759.96	-5599.4	-5541.11	-5537.78	-5644.21	-5088.21	-4991.31	-5028.57
56	204	-4151.83	-4066.23	-4284.6	-4403.06	-4103.89	-4297.02	-4239.92	-3949.34
57	203	-2211.17	-2642.7	-2449.72	-2554.99	-2218.32	-2382.41	-2333.01	-2220.35
58	202	-87.2956	-482.183	-752.373	-587.472	-762.484	-607.587	-246.896	-431.615
59	201	2088.59	1896.56	1522	2011.73	1361.5	1605.65	1155.25	1090.23
60	200	4515.16	4115.32	4600.16	3843.4	3241.5	4102.3	2983.56	4447.14

## Sheet: fig_s5_pDAm14_2DT2
Time1	1E-05	2.5E-06	6.25E-07
310	-0.0035369	0.00047241	-0.00354783
310.2	-0.00357625	0.00049994	-0.00303503
310.4	-0.00340772	0.00119932	-0.00242647
310.6	-0.0027323	0.00153189	-0.00251408
310.8	-0.00248219	0.00195923	-0.00191049
311	-0.00243959	0.00235988	-0.00146745
311.2	-0.00207603	0.00317536	-0.00122345
311.4	-0.00204005	0.0035766	-0.00048708
311.6	-0.00173175	0.00434877	-0.00015987
311.8	-0.00136563	0.00511037	-7.2e-06
312	-0.00132793	0.00549448	0.00016442
312.2	-0.00123646	0.00580084	0.00030492
312.4	-0.00116268	0.00579815	0.00076359
312.6	-0.00149559	0.00534438	0.00022306
312.8	-0.00117733	0.00563283	0.00041282
313	-0.0008584	0.00581255	0.00032516
313.2	-0.00084554	0.00591	0.00060967
313.4	-0.00056339	0.00611839	0.00087453
313.6	-0.00070339	0.00521274	0.00072222
313.8	-0.00079918	0.00504808	0.00043657
314	-0.00078918	0.00500592	0.00038939
314.2	-0.00055532	0.00489142	0.00043545
314.4	-0.00055164	0.00446925	-5.928e-05
314.6	-0.00015404	0.003845	-0.00061838
314.8	-0.00069557	0.00318922	-0.00060012
315	-0.00075676	0.00290179	-0.00078081
315.2	-0.00068621	0.00323377	-0.00089914
315.4	-0.00095168	0.00275802	-0.00113107
315.6	-0.00088394	0.00322463	-0.00127139
315.8	-0.00100124	0.00288953	-0.00115883
316	-0.00144607	0.00264154	-0.00085949
316.2	-0.00168472	0.00245748	-0.00126761
316.4	-0.00179886	0.00230942	-0.00116586
316.6	-0.00204952	0.0021115	-0.00135524
316.8	-0.00163821	0.00204745	-0.00104413
317	-0.00137459	0.00228001	-0.00087379
317.2	-0.00080939	0.00276509	-0.0001698
317.4	-0.00058021	0.00301052	4.666e-05
317.6	-0.00047384	0.00304576	-2.001e-05
317.8	9.161e-05	0.00338119	0.00038996
318	0.00032693	0.00394456	0.00040238
318.2	0.00080741	0.00387405	0.0006677
318.4	0.00081075	0.00314482	0.00036243
318.6	0.00123906	0.00313024	0.00024766
318.8	0.00107989	0.00268703	-4.337e-05
319	0.00151255	0.00306723	0.00020826
319.2	0.00176868	0.00338186	0.00026741
319.4	0.00229423	0.00327406	8.974e-05
319.6	0.0023627	0.0034565	0.00086132
319.8	0.00233697	0.00319282	0.00081264
320	0.00197628	0.00282401	0.00050343
320.2	0.00174843	0.00264208	-0.00016265
320.4	0.00197683	0.00280981	0.00028719
320.6	0.00219798	0.00273127	0.00076164
320.8	0.00204012	0.00280376	0.00091671
321	0.00207871	0.00309041	0.0010546
321.2	0.00225547	0.00373653	0.00118241
321.4	0.00167201	0.00422477	0.00112998
321.6	0.00198826	0.00472474	0.00131051
321.8	0.00195446	0.00474854	0.00167665
322	0.00151157	0.00488276	0.00169535
322.2	0.00144969	0.00465178	0.00162143
322.4	0.00170807	0.00446453	0.0013521
322.6	0.001553	0.00457258	0.00108241
322.8	0.00133365	0.00444258	0.00083964
323	0.00159232	0.00431497	0.00111903
323.2	0.00216516	0.00431127	0.00090433
323.4	0.00243566	0.00472074	0.00086604
323.6	0.00245292	0.00505582	0.00141134
323.8	0.00264357	0.00534821	0.00088921
324	0.00234045	0.00483702	0.00040622
324.2	0.00252932	0.00522119	0.00029705
324.4	0.00296251	0.0054477	0.00053235
324.6	0.00300382	0.00518196	0.0004708
324.8	0.00235356	0.00527162	4.062e-05
325	0.00240644	0.00499762	-0.00028607
325.2	0.00199402	0.00485873	-0.00034958
325.4	0.00180813	0.00459868	-0.00022664
325.6	0.00217315	0.00460075	-3.634e-05
325.8	0.00226577	0.00423083	0.0002022
326	0.00181026	0.00318169	-0.00051267
326.2	0.00183684	0.00264606	-0.0012469
326.4	0.00220708	0.00302788	-0.00112173
326.6	0.00248511	0.00333075	-0.00113981
326.8	0.00247488	0.00289478	-0.00077584
327	0.00268352	0.00291665	-0.00023275
327.2	0.0030398	0.0033442	0.00012893
327.4	0.00296113	0.00376402	0.00073597
327.6	0.00334924	0.00389588	0.00117456
327.8	0.00335632	0.00415254	0.00080375
328	0.00331094	0.00424625	0.00039984
328.2	0.00363188	0.00445204	0.00082562
328.4	0.00338704	0.00438273	0.00057463
328.6	0.00295475	0.00454101	8.515e-05
328.8	0.00297276	0.00525419	0.00016894
329	0.00342965	0.0055887	9.437e-05
329.2	0.00277516	0.00479727	-0.00050964
329.4	0.00275402	0.00530442	-0.00066902
329.6	0.00277407	0.00551033	-0.00064443
329.8	0.00321687	0.0055402	-0.00078125
330	0.00296426	0.00533504	-0.00111733
330.2	0.00339716	0.00562099	-0.00138309
330.4	0.00363239	0.0058171	-0.00119453
330.6	0.00338329	0.00567424	-0.00079631
330.8	0.00257256	0.00459247	-0.00074448
331	0.00240133	0.00450682	-0.00023143
331.2	0.00207738	0.00411394	-0.00035091
331.4	0.00194439	0.00397749	0.00015211
331.6	0.00163306	0.00358827	0.00010284
331.8	0.00120146	0.00324975	0.00021999
332	0.00123956	0.00304062	0.0003671
332.2	0.00105853	0.00240749	0.00087076
332.4	0.00083095	0.00223029	0.00089905
332.6	0.00120577	0.00257988	0.00063866
332.8	0.00140832	0.00330239	0.00097115
333	0.0009737	0.00305573	0.00064889
333.2	0.00077389	0.00264535	0.00058463
333.4	0.00125387	0.00344358	0.00126238
333.6	0.00127583	0.00334694	0.00106202
333.8	0.00189151	0.0039426	0.00108522
334	0.00186003	0.00358397	0.00097681
334.2	0.00114339	0.00278273	-0.00020237
334.4	0.0005223	0.00257998	-0.00041585
334.6	4.068e-05	0.00235038	-0.00091707
334.8	0.00032953	0.00250106	-0.001054
335	0.00064807	0.00256092	-0.00094121
335.2	0.00099783	0.00268295	-0.00119198
335.4	0.0015342	0.00245548	-0.00091014
335.6	0.0014693	0.00209088	-0.00149808
335.8	0.00144837	0.0018684	-0.00116576
336	0.00169723	0.00193871	-0.0012688
336.2	0.00221307	0.00220925	-0.00079403
336.4	0.00342873	0.00264221	5.651e-05
336.6	0.0040764	0.00314338	2.098e-05
336.8	0.00464621	0.00393414	0.00102306
337	0.00549734	0.00464222	0.00130461
337.2	0.00638682	0.0055299	0.001836
337.4	0.00681073	0.00606469	0.00179724
337.6	0.00673915	0.00646111	0.00172339
337.8	0.00704706	0.00681229	0.00191669
338	0.00681036	0.00641745	0.00196484
338.2	0.00611069	0.00624418	0.00154296
338.4	0.00585069	0.00616902	0.00114484
338.6	0.0059047	0.00649122	0.00087086
338.8	0.00635758	0.00715213	0.00150413
339	0.00675018	0.00756593	0.00149705
339.2	0.00679757	0.00738542	0.00136357
339.4	0.00642628	0.00745352	0.00111151
339.6	0.0058763	0.00741004	0.00116501
339.8	0.00558376	0.00702828	0.00149618
340	0.00519647	0.00660566	0.00121588
340.2	0.00547889	0.0063267	0.00180401
340.4	0.00588646	0.00622228	0.00207686
340.6	0.00526346	0.00595727	0.00134201
340.8	0.00560145	0.00613046	0.00181199
341	0.00571693	0.00630881	0.0016355
341.2	0.00536402	0.00582528	0.001146
341.4	0.00505941	0.00519083	0.00042682
341.6	0.00478467	0.00474646	0.00038621
341.8	0.00391602	0.00375477	-0.00049224
342	0.00388182	0.00305189	-0.00050975
342.2	0.00396665	0.00291514	-0.00040769
342.4	0.00370033	0.002918	-0.00069282
342.6	0.00391958	0.00321607	-0.00023971
342.8	0.00425449	0.00373062	0.00011777
343	0.00400273	0.00399637	-0.00023654
343.2	0.00364046	0.00366926	-0.00035221
343.4	0.00420506	0.00467969	0.00047628
343.6	0.00509043	0.00483648	0.00103274
343.8	0.00509328	0.0049504	0.00175964
344	0.00497485	0.00544172	0.00188916
344.2	0.00536173	0.00577437	0.00270264
344.4	0.00552708	0.00669889	0.00250629
344.6	0.00563295	0.00675754	0.0024509
344.8	0.00645918	0.00700529	0.00337225
345	0.00641065	0.00660052	0.00291277
345.2	0.00633874	0.00648653	0.00245847
345.4	0.00665973	0.00655396	0.00249948
345.6	0.00656483	0.00647736	0.00214445
345.8	0.00626627	0.00561072	0.00172715
346	0.00727192	0.00539722	0.00177527
346.2	0.00720511	0.00532498	0.00159403
346.4	0.00642633	0.0047758	0.00063432
346.6	0.00590241	0.00423773	0.00021179
346.8	0.00581344	0.00424056	-7.793e-05
347	0.00543507	0.00342081	-0.00050753
347.2	0.00600316	0.00376427	-8e-06
347.4	0.0059876	0.00340503	0.00010836
347.6	0.00611588	0.00283882	0.00032544
347.8	0.00564106	0.00233199	0.00053425
348	0.00576355	0.00236843	0.00011778
348.2	0.0054471	0.00230591	0.00067285
348.4	0.00512924	0.00206208	7.339e-05
348.6	0.00506996	0.0018765	0.00019824
348.8	0.00513164	0.00209203	0.00029413
349	0.00446111	0.0021491	-0.00027785
349.2	0.00433273	0.00260491	-0.0004482
349.4	0.00439128	0.00301236	-0.00054129
349.6	0.00450052	0.00323527	-0.00070221
349.8	0.00473681	0.00384428	-0.0007826
350	0.00501178	0.00488256	-0.00117149
350.2	0.00435406	0.00473823	-0.00151013
350.4	0.00420433	0.00478376	-0.00139111
350.6	0.0045098	0.00457821	-0.00126163
350.8	0.00455435	0.00413193	-0.00143595
351	0.00460604	0.00419778	-0.00126639
351.2	0.00464071	0.00449136	-0.00111651
351.4	0.00448186	0.00355761	-0.001118
351.6	0.00497073	0.00335914	-0.00042771
351.8	0.00484764	0.00311679	-0.0005888
352	0.00471136	0.0029994	-0.00083247
352.2	0.00439509	0.00297347	-0.00037518
352.4	0.00391871	0.00221693	-0.00102859
352.6	0.0038464	0.00198093	-0.00091398
352.8	0.00321498	0.00164604	-0.00092001
353	0.00287461	0.00155698	-0.00114296
353.2	0.00319302	0.00128718	-0.00106412
353.4	0.00357592	0.0017802	-0.00072091
353.6	0.00386501	0.00201177	-0.0002274
353.8	0.00388702	0.00278664	0.00024056
354	0.00373732	0.00308384	0.00018609
354.2	0.00396352	0.00270091	0.00044148
354.4	0.00423359	0.00254002	0.00091982
354.6	0.00464235	0.00289832	0.00078089
354.8	0.00417938	0.00315286	0.00052142
355	0.00430901	0.00397396	0.00112332
355.2	0.00449824	0.00453731	0.0016554
355.4	0.00518167	0.00494881	0.00242607
355.6	0.00542074	0.00549583	0.00229228
355.8	0.00561214	0.00552326	0.0019074
356	0.0056203	0.00538056	0.00189149
356.2	0.00556903	0.00534675	0.0018391
356.4	0.00550412	0.00503791	0.00132331
356.6	0.0054884	0.00496544	0.00138362
356.8	0.00460246	0.0044759	0.00044553
357	0.00521141	0.00483301	0.00027817
357.2	0.00557376	0.00483688	0.00021049
357.4	0.00558848	0.00451945	0.00012644
357.6	0.00616901	0.00466147	0.00027026
357.8	0.00612745	0.00471279	0.00028479
358	0.00579217	0.00403965	-0.00065343
358.2	0.00607962	0.00333999	-0.00059701
358.4	0.00588045	0.00304429	-0.00111972
358.6	0.00566264	0.00314923	-0.00126347
358.8	0.00512374	0.00244607	-0.0013379
359	0.00518782	0.00227209	-0.00066173
359.2	0.00533085	0.00239948	-0.00026572
359.4	0.0056584	0.00211067	-6.787e-05
359.6	0.00554939	0.00202487	-0.00042369
359.8	0.0054576	0.00191564	-0.0004589
360	0.00532115	0.00197637	4.724e-05
360.2	0.0048085	0.0022491	-7.25e-05
360.4	0.00461495	0.00239208	-0.00030904
360.6	0.00437739	0.00302677	-0.00015927
360.8	0.00414617	0.00299336	-0.00035841
361	0.00496542	0.00393498	0.00032663
361.2	0.00523781	0.00411937	0.00067472
361.4	0.0052962	0.00408208	0.00080633
361.6	0.00572189	0.00457614	0.0010434
361.8	0.00506367	0.00386607	0.00074994
362	0.00498982	0.00353267	0.00026041
362.2	0.00540025	0.00341298	0.00053826
362.4	0.00505682	0.0032849	0.00020189
362.6	0.00497723	0.00312367	0.0002226
362.8	0.00490627	0.00274034	-6.285e-05
363	0.00476237	0.00251138	-0.00028121
363.2	0.00538885	0.00267509	-0.00040254
363.4	0.00517711	0.0025355	-0.00085455
363.6	0.00499844	0.00277695	-0.00132843
363.8	0.00514534	0.00316145	-0.00109517
364	0.00493358	0.00308165	-0.00089393
364.2	0.00444979	0.00287554	-0.00132139
364.4	0.00468955	0.00328808	-0.00115328
364.6	0.00473107	0.00451531	-0.00040078
364.8	0.00515288	0.00444249	0.00014434
365	0.00528703	0.00473721	0.00072377
365.2	0.00478191	0.00412264	0.00089279
365.4	0.00466439	0.00402529	0.00074527
365.6	0.00486213	0.00389288	0.0007464
365.8	0.00483213	0.00361553	0.0008825
366	0.00490387	0.00311769	0.0007757
366.2	0.00532566	0.00300546	0.00115746
366.4	0.00531316	0.00322657	0.00117654
366.6	0.00572677	0.00350503	0.00151471
366.8	0.00548953	0.00282639	0.00093165
367	0.00586901	0.00275793	0.00094634
367.2	0.00643074	0.00288766	0.00092127
367.4	0.00518674	0.00276205	0.00047477
367.6	0.00597849	0.0030635	0.00079823
367.8	0.00633195	0.00360604	0.00138582
368	0.00619724	0.00308473	0.00124759
368.2	0.00613878	0.0032961	0.00148393
368.4	0.00646965	0.00422788	0.00195151
368.6	0.00647235	0.00436277	0.00262177
368.8	0.00584703	0.0033891	0.0021107
369	0.0052285	0.00324937	0.00207334
369.2	0.00535578	0.00328	0.00202194
369.4	0.0057915	0.00416002	0.00246171
369.6	0.00557944	0.00416957	0.00275598
369.8	0.00512073	0.00345144	0.00246328
370	0.00510785	0.00329181	0.00226154
370.2	0.00470709	0.00302557	0.0025663
370.4	0.00477974	0.00326814	0.00255172
370.6	0.00454804	0.00277607	0.00219053
370.8	0.00447284	0.00264565	0.00149723
371	0.0050907	0.00313937	0.0017428
371.2	0.00495948	0.0031073	0.00145449
371.4	0.00493187	0.00357979	0.00199014
371.6	0.00580143	0.00416506	0.00250129
371.8	0.00615693	0.00481991	0.00264014
372	0.00606024	0.0042166	0.00235026
372.2	0.00659197	0.00462727	0.00277339
372.4	0.00673213	0.00462769	0.00274746
372.6	0.0065106	0.00478141	0.00285097
372.8	0.00675244	0.00519633	0.00249536
373	0.00770728	0.00599991	0.00264607
373.2	0.00811081	0.00616495	0.00294751
373.4	0.00811376	0.00601228	0.00264477
373.6	0.00728791	0.00540156	0.00198707
373.8	0.00709796	0.00462539	0.00113409
374	0.00724572	0.00468152	0.00176769
374.2	0.00677183	0.00420586	0.00187363
374.4	0.00737393	0.00476376	0.00186966
374.6	0.00712985	0.00451186	0.0016537
374.8	0.00736076	0.00531441	0.00201036
375	0.00676705	0.00519228	0.00155324
375.2	0.00623772	0.00521605	0.00202326
375.4	0.00577437	0.0051956	0.00251557
375.6	0.00539125	0.00462956	0.00219542
375.8	0.00612229	0.00483796	0.00196253
376	0.00581207	0.00436735	0.00190576
376.2	0.00562298	0.00437843	0.00165733
376.4	0.00537599	0.00435312	0.00068792
376.6	0.00546475	0.004832	0.0001831
376.8	0.00572509	0.0053354	8.068e-05
377	0.00551385	0.00509708	-0.00032902
377.2	0.00563698	0.00471904	-0.00026297
377.4	0.00588853	0.00498266	-0.00070198
377.6	0.00547135	0.00514176	-0.00056399
377.8	0.00607819	0.00518862	-0.0006056
378	0.00605151	0.00506599	-0.00050687
378.2	0.00600092	0.00466513	-0.00081789
378.4	0.00629068	0.00470336	-0.00057616
378.6	0.00620414	0.00468201	-0.00028084
378.8	0.00629716	0.00482523	0.00018517
379	0.00601625	0.00423434	7.539e-05
379.2	0.00622615	0.00422785	0.00113003
379.4	0.00628373	0.00396258	0.00183362
379.6	0.00639407	0.00335449	0.00171558
379.8	0.00639563	0.00358013	0.00162854
380	0.00574845	0.00294004	0.00112731
380.2	0.0053742	0.00259392	0.00081647
380.4	0.00520499	0.0023673	0.0001573
380.6	0.00490206	0.00284787	0.00053796
380.8	0.00401473	0.00278804	0.00052487
381	0.00386227	0.00252904	0.00025242
381.2	0.00387976	0.0028049	0.00019136
381.4	0.00387345	0.00322171	0.00013452
381.6	0.00383239	0.00387618	7.316e-05
381.8	0.00388853	0.00374186	-0.00046151
382	0.00362838	0.00322167	-0.00076772
382.2	0.00428954	0.0035204	-0.00024229
382.4	0.00478453	0.00390551	0.0003437
382.6	0.00537415	0.0044036	0.00077052
382.8	0.0055675	0.00463606	0.00082733
383	0.00571364	0.0047419	0.00105383
383.2	0.0055054	0.00492163	0.00156913
383.4	0.00537922	0.00418157	0.00139445
383.6	0.0051937	0.00414053	0.00128342
383.8	0.00492983	0.00419756	0.00122379
384	0.00557661	0.00480442	0.00118502
384.2	0.00536718	0.00512077	0.00144782
384.4	0.00520137	0.00506723	0.00136499
384.6	0.00509106	0.00522739	0.00149085
384.8	0.00477916	0.00471428	0.00101476
385	0.00515904	0.00513613	0.00087887
385.2	0.00590884	0.00574457	0.00097964
385.4	0.00655701	0.00584515	0.00120645
385.6	0.00713789	0.00645597	0.00086689
385.8	0.00714605	0.00571415	7.878e-05
386	0.00754577	0.00589181	0.00020846
386.2	0.00788242	0.0059141	-4.71e-05
386.4	0.00821392	0.00565181	-0.00014766
386.6	0.00796247	0.00549991	-0.00035544
386.8	0.0075622	0.0051228	-0.00104651
387	0.00755893	0.00487874	-0.0011135
387.2	0.00699157	0.00458927	-0.0016913
387.4	0.00665114	0.00408689	-0.00208806
387.6	0.00602949	0.00460324	-0.00162244
387.8	0.00544705	0.00447523	-0.00141832
388	0.00519696	0.00474399	-0.00119365
388.2	0.00447958	0.00433074	-0.00084628
388.4	0.00499583	0.00456148	0.00017443
388.6	0.00528942	0.00483187	0.00031036
388.8	0.00536496	0.0052137	0.00059521
389	0.00569046	0.005489	0.00076136
389.2	0.00620892	0.00598892	0.00129813
389.4	0.00663995	0.00583479	0.00185767
389.6	0.00641932	0.0060585	0.00172778
389.8	0.00607114	0.00608097	0.00171967
390	0.0058133	0.006119	0.00190052
390.2	0.00547835	0.00520819	0.00140931
390.4	0.00579315	0.00481903	0.00186275
390.6	0.00513784	0.00454723	0.00141583
390.8	0.00501681	0.0043869	0.00058917
391	0.0046534	0.00433415	0.00026036
391.2	0.00441941	0.0037704	-7.78e-05
391.4	0.00414725	0.00341857	-0.00032414
391.6	0.00377904	0.00304962	-0.00021825
391.8	0.00354344	0.00268691	-0.00040168
392	0.00342495	0.00296652	-0.00047439
392.2	0.00425158	0.00337129	-0.00020764
392.4	0.00526062	0.00400757	0.00053214
392.6	0.00558668	0.00427409	0.00028041
392.8	0.00618089	0.00420131	0.00013489
393	0.00671979	0.00454033	-3.788e-05
393.2	0.0067063	0.00494645	0.00042187
393.4	0.00691043	0.00519038	-0.00010444
393.6	0.00628111	0.00583889	-4.399e-05
393.8	0.00624237	0.00592912	-0.00015868
394	0.00618432	0.00579094	-6.421e-05
394.2	0.0064506	0.00541229	8.126e-05
394.4	0.00661831	0.00586657	0.0004448
394.6	0.00651361	0.00603923	0.00024266
394.8	0.00619341	0.00586313	0.00028162
395	0.00624026	0.00624067	0.000748
395.2	0.00621422	0.00575818	0.00107815
395.4	0.00533808	0.00515123	0.00059457
395.6	0.00524836	0.00503257	0.00074105
395.8	0.00498201	0.00444815	0.00022242
396	0.00532201	0.00455649	0.00017466
396.2	0.00578084	0.00416086	-0.0001221
396.4	0.0058692	0.00395229	-0.00012223
396.6	0.00550389	0.00328297	-0.00068316
396.8	0.00554745	0.00258564	-0.00141321
397	0.00570878	0.00336858	-0.00140946
397.2	0.00549128	0.00362662	-0.00141416
397.4	0.00529003	0.00388215	-0.00194045
397.6	0.00517307	0.00411374	-0.0014454
397.8	0.00579508	0.00475637	-0.00128474
398	0.00618699	0.00553586	-0.00092066
398.2	0.00652378	0.00594338	-0.00079463
398.4	0.00668949	0.00637242	-0.00035758
398.6	0.00631244	0.00628064	-0.00041445
398.8	0.00592655	0.00653654	-0.00012413
399	0.00627212	0.0067323	0.00031406
399.2	0.00605634	0.0063804	0.00050415
399.4	0.0056961	0.00613591	0.00046218
399.6	0.00622774	0.0066073	0.00100316
399.8	0.0064319	0.00625031	0.00113048
400	0.00681671	0.00673519	0.00106499
400.2	0.00698666	0.0070139	0.00176319
400.4	0.00681346	0.00671438	0.00179149
400.6	0.00668297	0.00614955	0.00169974
400.8	0.00679134	0.00609375	0.00169391
401	0.00714871	0.00669142	0.0020582
401.2	0.00674672	0.00654306	0.00160965
401.4	0.00671623	0.0061776	0.00133035
401.6	0.00649993	0.00599467	0.00118195
401.8	0.00683471	0.00686586	0.00138773
402	0.00622325	0.00662017	0.0014193
402.2	0.00568217	0.0061124	0.0011135
402.4	0.00522711	0.00549559	0.00082727
402.6	0.00475316	0.00556898	0.00042921
402.8	0.00446079	0.00529982	0.00039236
403	0.00441635	0.0048634	0.00040646
403.2	0.00385924	0.00466363	0.00030571
403.4	0.00370136	0.00450695	0.00029834
403.6	0.0034759	0.00478755	0.00065988
403.8	0.00393121	0.00499728	0.00104504
404	0.00428378	0.00545323	0.00130717
404.2	0.00462594	0.00589446	0.00222924
404.4	0.004886	0.00544467	0.00195164
404.6	0.00553652	0.00591522	0.00218615
404.8	0.00593841	0.00608946	0.00252404
405	0.00639746	0.00653563	0.00259313
405.2	0.00648496	0.00625384	0.00248887
405.4	0.00674373	0.00634888	0.00280917
405.6	0.00632638	0.00649813	0.00295551
405.8	0.00593799	0.00688137	0.00329574
406	0.00531926	0.00670224	0.00364455
406.2	0.00475966	0.00640475	0.00315765
406.4	0.00489193	0.00656693	0.00291077
406.6	0.00474477	0.00637	0.00293881
406.8	0.00461658	0.00607394	0.002776
407	0.00497324	0.00586439	0.00275144
407.2	0.00475685	0.00519574	0.00262256
407.4	0.00483663	0.00471137	0.00223314
407.6	0.0042939	0.00488539	0.00202351
407.8	0.00435902	0.00500498	0.00181834
408	0.00453086	0.00483126	0.00133077
408.2	0.00486462	0.00510084	0.0012391
408.4	0.00499037	0.00467718	0.00037992
408.6	0.00522517	0.00467646	0.00014755
408.8	0.00539572	0.00459572	1.18e-06
409	0.00517534	0.00434571	-0.0003378
409.2	0.00516144	0.00407098	6.67e-05
409.4	0.00522453	0.00424237	0.00029836
409.6	0.00510976	0.00435014	0.00078661
409.8	0.00501593	0.00468058	0.00112292
410	0.0046459	0.00475911	0.00114999
410.2	0.00469275	0.00495339	0.00082404
410.4	0.00482736	0.0051341	0.00099607
410.6	0.00517716	0.00511545	0.00165724
410.8	0.00564486	0.00554861	0.00248792
411	0.00585948	0.00547109	0.00263424
411.2	0.00529757	0.00491667	0.00256759
411.4	0.00556643	0.00559436	0.00290562
411.6	0.00550351	0.00621362	0.00303314
411.8	0.00546004	0.00606999	0.00283152
412	0.00539837	0.00571942	0.00249887
412.2	0.00546587	0.00572245	0.00209875
412.4	0.00546382	0.00545036	0.00197236
412.6	0.00597581	0.00566231	0.00265178
412.8	0.00604973	0.00604547	0.00261143
413	0.0063813	0.00583373	0.00298024
413.2	0.0065824	0.00553878	0.0031373
413.4	0.00684533	0.00566702	0.00258729
413.6	0.00759953	0.00620075	0.00325302
413.8	0.00769801	0.0069712	0.00299958
414	0.00728435	0.00677665	0.00238289
414.2	0.00801534	0.00718386	0.00249222
414.4	0.00787576	0.00700366	0.00224842
414.6	0.00806624	0.00677627	0.00218215
414.8	0.00814485	0.00676229	0.00223399
415	0.00831275	0.00676845	0.00168543
415.2	0.00783206	0.00643856	0.00200085
415.4	0.0086373	0.00672529	0.00239873
415.6	0.00838921	0.00598698	0.00202173
415.8	0.00773392	0.00530661	0.00124366
416	0.00736749	0.004991	0.00091823
416.2	0.00803153	0.00523625	0.00088538
416.4	0.00709805	0.0051895	0.00111134
416.6	0.00691377	0.00555737	0.00132869
416.8	0.00618492	0.00544014	0.00076465
417	0.00646703	0.00548008	0.00101793
417.2	0.00635562	0.00560593	0.00064674
417.4	0.00678122	0.00637044	0.00090134
417.6	0.0070918	0.00651598	0.00166138
417.8	0.00675021	0.00643274	0.00134111
418	0.00655589	0.00617953	0.00108606
418.2	0.006591	0.00660461	0.00123227
418.4	0.00628719	0.00639454	0.00102422
418.6	0.00627387	0.00672057	0.00143093
418.8	0.00625775	0.00666538	0.00135272
419	0.00558476	0.00639889	0.00103149
419.2	0.00509676	0.00609727	0.00202395
419.4	0.00523588	0.00561596	0.00198446
419.6	0.00480099	0.00511932	0.00164227
419.8	0.00420979	0.00483015	0.00136111
420	0.00398935	0.00477573	0.00187485
420.2	0.00374384	0.00458346	0.00199091
420.4	0.00279765	0.00439391	0.00153911
420.6	0.00284829	0.00444085	0.00160413
420.8	0.00268355	0.00411094	0.00054452
421	0.00346923	0.00424829	0.00052138
421.2	0.00378199	0.00436356	8.398e-05
421.4	0.00425536	0.00462121	0.0004102
421.6	0.00477413	0.00426975	0.00057923
421.8	0.00528716	0.0048781	0.00054009
422	0.00564533	0.0052233	0.0005861
422.2	0.00591255	0.00571953	0.0006442
422.4	0.00596965	0.00598079	0.00048977
422.6	0.00610984	0.00682349	0.00074937
422.8	0.00597808	0.006715	0.00020827
423	0.00592465	0.00701805	0.00017642
423.2	0.0065993	0.00743641	0.00144035
423.4	0.0065947	0.00760942	0.00144364
423.6	0.00696086	0.00803184	0.00163344
423.8	0.0067192	0.00801469	0.00188705
424	0.00673151	0.00834666	0.00221655
424.2	0.00655406	0.0081466	0.00231852
424.4	0.0062587	0.00835234	0.001876
424.6	0.00615842	0.0080538	0.00218915
424.8	0.0064629	0.00801297	0.00163841
425	0.00666025	0.00759832	0.00189977
425.2	0.00650543	0.00770151	0.00216412
425.4	0.00634824	0.00776863	0.00277887
425.6	0.00648246	0.00744632	0.00267678
425.8	0.0062626	0.00755309	0.00219643
426	0.00574081	0.00716129	0.00207495
426.2	0.00524621	0.00722043	0.00131603
426.4	0.00516249	0.00737158	0.00104063
426.6	0.0052664	0.00733077	0.00101336
426.8	0.00511219	0.00702678	0.00069991
427	0.00565562	0.00729441	0.00090091
427.2	0.00560421	0.0073547	0.00122772
427.4	0.00554716	0.00741348	0.0006915
427.6	0.0058449	0.00726979	0.00034931
427.8	0.00545274	0.00709012	0.00032881
428	0.00529685	0.00701998	0.00033643
428.2	0.00508454	0.00641041	0.00022545
428.4	0.00496727	0.00651207	-2.672e-05
428.6	0.00555581	0.00610959	0.00057585
428.8	0.00507331	0.00518557	-0.00026915
429	0.00481628	0.00464037	-0.00040855
429.2	0.0047641	0.00509087	-0.00026166
429.4	0.00427913	0.00509715	-0.00049745
429.6	0.00430846	0.00524499	-0.00062165
429.8	0.00471817	0.00580592	-0.00044503
430	0.00491431	0.00628213	-0.00028508
430.2	0.00526176	0.0061799	-0.00052122
430.4	0.00582405	0.00637714	1.374e-05
430.6	0.00585536	0.00652454	-8.934e-05
430.8	0.00627048	0.00693802	0.00045782
431	0.00664576	0.00739583	0.00047275
431.2	0.00690176	0.00806079	0.00044891
431.4	0.00727596	0.00846083	0.00056195
431.6	0.00749215	0.00844399	0.00122657
431.8	0.00763433	0.00874176	0.00125236
432	0.00794475	0.00872854	0.0013547
432.2	0.00750477	0.00850604	0.00153583
432.4	0.00765737	0.00858344	0.00205542
432.6	0.00765458	0.00812379	0.00231388
432.8	0.00703354	0.00767024	0.00146107
433	0.00725019	0.00700133	0.00121694
433.2	0.00675995	0.0067064	0.00077704
433.4	0.00628902	0.00670307	0.00047974
433.6	0.00640091	0.00651066	-6.485e-05
433.8	0.0069866	0.00697812	0.00050015
434	0.00687878	0.00680533	-0.00015692
434.2	0.00639889	0.00635555	-7.214e-05
434.4	0.00640258	0.00649581	0.00010997
434.6	0.00640941	0.00654644	0.0002565
434.8	0.00654575	0.00706221	0.00072512
435	0.00636593	0.00732089	0.00049955
435.2	0.00689681	0.0077709	0.00088456
435.4	0.00679811	0.00765695	0.00147128
435.6	0.0065176	0.00734267	0.0015251
435.8	0.00635005	0.00758739	0.00145035
436	0.00606756	0.00775832	0.00161698
436.2	0.00553771	0.00767849	0.00169556
436.4	0.00559977	0.00686458	0.00145828
436.6	0.00548804	0.00670282	0.00140831
436.8	0.0057856	0.0059551	0.00046991
437	0.00605821	0.00509026	0.00066155
437.2	0.00553054	0.00527058	4.081e-05
437.4	0.00558728	0.00546038	0.00012961
437.6	0.00553645	0.00560051	0.000339
437.8	0.00545424	0.00603053	0.00106985
438	0.00572372	0.00596937	0.00079402
438.2	0.00617215	0.00604098	0.00171812
438.4	0.00661046	0.00622076	0.00214458
438.6	0.00655863	0.00627664	0.00218596
438.8	0.00614776	0.00635609	0.00211706
439	0.00600441	0.00662296	0.00192198
439.2	0.0066013	0.006615	0.00205387
439.4	0.00624618	0.00613026	0.00193773
439.6	0.00614538	0.00593096	0.00140912
439.8	0.00607982	0.00583897	0.00100828
440	0.00589586	0.00590117	0.00064952
440.2	0.00616425	0.00547985	0.0008266
440.4	0.00617724	0.00483703	0.00054668
440.6	0.00647781	0.00543591	0.00104689
440.8	0.00709289	0.00546747	0.00122221
441	0.00728137	0.00566371	0.00152468
441.2	0.00687085	0.00588448	0.00168472
441.4	0.00703043	0.00616999	0.00222675
441.6	0.00696942	0.00637299	0.00222297
441.8	0.0070996	0.00663854	0.00241037
442	0.00765872	0.00748796	0.0030785
442.2	0.00737089	0.00786238	0.00327286
442.4	0.00668525	0.00780284	0.00309942
442.6	0.00647323	0.00811368	0.00261082
442.8	0.00612521	0.00820334	0.00250889
443	0.00647137	0.00862607	0.00237246
443.2	0.00649434	0.0077868	0.00204647
443.4	0.00568481	0.00722818	0.00203893
443.6	0.00529833	0.00671983	0.00126744
443.8	0.00454102	0.00663055	0.0008313
444	0.00438583	0.00676512	0.00132974
444.2	0.00477059	0.00678889	0.00160665
444.4	0.00484907	0.00694518	0.00131316
444.6	0.00469186	0.00687734	0.00150525
444.8	0.00534902	0.00720319	0.00138221
445	0.00539861	0.00732899	0.00110296
445.2	0.00500103	0.00701944	0.00085981
445.4	0.00507284	0.00715577	0.00034981
445.6	0.00483637	0.00690189	5.944e-05
445.8	0.00489718	0.00765852	0.00056816
446	0.00487305	0.00738882	0.00069992
446.2	0.00472177	0.00743904	0.00028819
446.4	0.00491061	0.00745804	-0.00015987
446.6	0.00536436	0.00770695	-0.00040738
446.8	0.00534165	0.0074085	-0.00011599
447	0.00583338	0.00732408	2.778e-05
447.2	0.00549557	0.00658128	0.00012432
447.4	0.00509531	0.00653322	-3.329e-05
447.6	0.00524043	0.00662475	-0.00025601
447.8	0.00527989	0.00718146	-0.00028174
448	0.00557046	0.0073606	3.586e-05
448.2	0.00597982	0.00813979	-0.00013543
448.4	0.00622973	0.00876697	-0.00019393
448.6	0.00628301	0.00936874	0.00033381
448.8	0.00712288	0.0101151	0.00101236
449	0.00681861	0.0101457	0.00131779
449.2	0.00659354	0.00938544	0.00090545
449.4	0.005997	0.00919492	0.00117262
449.6	0.00577175	0.00864625	0.00164764
449.8	0.00557945	0.00887634	0.00228169
450	0.0059283	0.00872125	0.00255156
450.2	0.00588271	0.0092171	0.00254283
450.4	0.00604234	0.00871111	0.00232368
450.6	0.00566672	0.00804838	0.00236155
450.8	0.00530795	0.00814872	0.00239452
451	0.00532501	0.00778996	0.00226859
451.2	0.00509518	0.00764736	0.00221084
451.4	0.0050591	0.00776501	0.00168469
451.6	0.00523522	0.0078321	0.00114054
451.8	0.00533676	0.0079611	0.00047927
452	0.00530318	0.00846091	0.00038022
452.2	0.0056254	0.00916779	0.00063485
452.4	0.00589823	0.00929519	0.00149626
452.6	0.00629765	0.00946437	0.00197386
452.8	0.00602897	0.00932	0.0020953
453	0.00540549	0.00878812	0.00193995
453.2	0.00543779	0.0079995	0.00175428
453.4	0.0051641	0.0076036	0.00205947
453.6	0.00499936	0.00669655	0.00212632
453.8	0.00473719	0.00639146	0.00196699
454	0.00515902	0.00591201	0.00192899
454.2	0.00501185	0.00518829	0.00157579
454.4	0.00484545	0.00468494	0.00150166
454.6	0.00429238	0.00437371	0.00128558
454.8	0.00461283	0.00480517	0.00158205
455	0.00555093	0.00448733	0.00214529
455.2	0.00626292	0.00502157	0.00254384
455.4	0.00610359	0.00554321	0.00257185
455.6	0.00608675	0.00600854	0.00217859
455.8	0.00649626	0.00647183	0.00218625
456	0.00636785	0.00690319	0.00245319
456.2	0.00691579	0.00739931	0.00298841
456.4	0.00648278	0.00716651	0.00271749
456.6	0.00636194	0.0070725	0.00240592
456.8	0.00577717	0.00698362	0.00160259
457	0.00583248	0.0070348	0.00104662
457.2	0.00580418	0.00709948	0.00035358
457.4	0.00502712	0.00679051	-0.00013972
457.6	0.00415239	0.00562249	-0.00073049
457.8	0.00404461	0.00568322	-0.00072389
458	0.00408021	0.00544254	-0.00064235
458.2	0.00390981	0.00532346	-0.00070537
458.4	0.00408211	0.00543239	-9.864e-05
458.6	0.00445624	0.00573427	5.056e-05
458.8	0.00500805	0.005903	0.00091572
459	0.00516006	0.00599479	0.00108709
459.2	0.00552134	0.00673957	0.00154421
459.4	0.00556602	0.00795087	0.00180052
459.6	0.00629267	0.00819201	0.00234432
459.8	0.00684693	0.00818022	0.00302245
460	0.00699542	0.00855862	0.00321374
460.2	0.00736911	0.00881899	0.00352325
460.4	0.00713532	0.00830923	0.00295631
460.6	0.00691096	0.0078303	0.0028875
460.8	0.00619106	0.00808231	0.00215513
461	0.00568701	0.0081934	0.0022037
461.2	0.00481063	0.00801837	0.00210502
461.4	0.00433216	0.00773027	0.0022668
461.6	0.00390927	0.00728104	0.00201099
461.8	0.00362684	0.00736125	0.00213233
462	0.00337873	0.00711224	0.00199417
462.2	0.00357573	0.00712243	0.00200203
462.4	0.00358665	0.00647564	0.00196684
462.6	0.00347089	0.00649583	0.00180284
462.8	0.00371971	0.00618406	0.00212054
463	0.0040269	0.00630117	0.00190435
463.2	0.00530389	0.00705907	0.00273682
463.4	0.00561946	0.00735536	0.00321214
463.6	0.00623414	0.00669638	0.00345267
463.8	0.00645699	0.00634681	0.00308213
464	0.00668537	0.00607168	0.00250084
464.2	0.00695786	0.00582389	0.00244478
464.4	0.00663328	0.00517338	0.00189109
464.6	0.00584944	0.00489108	0.00214177
464.8	0.00517898	0.00505332	0.00229353
465	0.00499339	0.00524767	0.00233527
465.2	0.00506126	0.00594648	0.0027747
465.4	0.00543997	0.00618187	0.00280186
465.6	0.00504549	0.00634105	0.00236255
465.8	0.00568433	0.00680217	0.00282834
466	0.00555928	0.00683958	0.00283541
466.2	0.00598722	0.00714056	0.00324204
466.4	0.00627241	0.00741643	0.00384759
466.6	0.006488	0.007695	0.0047229
466.8	0.00686625	0.00807963	0.00526392
467	0.00727654	0.00830248	0.00543407
467.2	0.00787128	0.00851825	0.00566614
467.4	0.00784978	0.00851836	0.00549554
467.6	0.00807685	0.00836899	0.00477106
467.8	0.0079174	0.00823817	0.00441473
468	0.00801428	0.00805512	0.00366592
468.2	0.00764008	0.00809552	0.00313602
468.4	0.00674713	0.0076062	0.00253523
468.6	0.00638491	0.00732498	0.00198867
468.8	0.00591938	0.00691471	0.00155425
469	0.0054657	0.00704829	0.00077164
469.2	0.00490264	0.00659021	0.00027171
469.4	0.0047277	0.00611757	-0.00078396
469.6	0.00442861	0.0059956	-0.00080059
469.8	0.00475697	0.00617763	8.505e-05
470	0.00446047	0.00573606	0.00080631
470.2	0.00476115	0.00596984	0.00156261
470.4	0.00524599	0.00629879	0.00244777
470.6	0.00524084	0.00583724	0.00283914
470.8	0.0057398	0.00646479	0.0031856
471	0.0064666	0.00676172	0.0039038
471.2	0.00681806	0.00732614	0.00392961
471.4	0.0064122	0.00761497	0.00426868
471.6	0.0068454	0.00753025	0.00438501
471.8	0.00762352	0.00774463	0.00463044
472	0.00821525	0.00790049	0.00411275
472.2	0.00832653	0.00820907	0.00401183
472.4	0.0084328	0.0083485	0.00298582
472.6	0.00849579	0.00840008	0.00275492
472.8	0.00821873	0.00856803	0.00251662
473	0.00741964	0.00861772	0.00176018
473.2	0.00680765	0.00783557	0.00108181
473.4	0.00667906	0.00788924	0.00129553
473.6	0.00618653	0.00729986	0.0016025
473.8	0.00573617	0.00726826	0.00170966
474	0.00559615	0.00719419	0.0017131
474.2	0.0053843	0.00724014	0.00116565
474.4	0.00538406	0.00671853	0.0009852
474.6	0.00519853	0.00622568	0.00063311
474.8	0.00470961	0.00585966	0.0005471
475	0.00466816	0.00599601	0.00061385
475.2	0.00463092	0.0065192	0.00034356
475.4	0.00453836	0.00648194	0.00053821
475.6	0.00534636	0.0067453	0.00073094
475.8	0.00606433	0.00718752	0.00075028
476	0.00654494	0.00762331	0.0008149
476.2	0.0065903	0.00792049	0.0006573
476.4	0.00702295	0.0084772	0.00079137
476.6	0.00692747	0.00846426	0.00126524
476.8	0.00667426	0.00837977	0.00120719
477	0.00586844	0.00801594	0.00089987
477.2	0.00589286	0.008031	0.00095925
477.4	0.00559458	0.00810287	0.00144173
477.6	0.00548884	0.00778196	0.00149736
477.8	0.00515644	0.00773201	0.00121808
478	0.00550546	0.00797361	0.00174167
478.2	0.00512384	0.00716955	0.00145748
478.4	0.00563894	0.00674228	0.00182593
478.6	0.00576545	0.00681927	0.00149188
478.8	0.0054594	0.00663096	0.00115872
479	0.00544172	0.00676837	0.00048709
479.2	0.00574914	0.00687514	0.00058832
479.4	0.00569373	0.00644233	0.00052203
479.6	0.00581457	0.00632032	0.00060955
479.8	0.00582066	0.00579803	0.00065219
480	0.00595464	0.00590907	0.00040642
480.2	0.00550239	0.00565038	0.00029166
480.4	0.00593262	0.00569442	0.00079951
480.6	0.00604334	0.0059045	0.00094601
480.8	0.00615161	0.0062243	0.00108636
481	0.00589069	0.00632878	0.00127782
481.2	0.00585157	0.00660283	0.00178201
481.4	0.0058108	0.00665589	0.00208269
481.6	0.00611431	0.0070163	0.00244214
481.8	0.00610809	0.00723698	0.00253943
482	0.00693848	0.00806329	0.00369433
482.2	0.00677179	0.00810579	0.0035752
482.4	0.00785424	0.00880297	0.00347053
482.6	0.00723371	0.00891554	0.00243236
482.8	0.00734688	0.00893804	0.00193696
483	0.00790963	0.00929148	0.00144656
483.2	0.00819372	0.00934114	0.00199511
483.4	0.00808595	0.00929289	0.00207178
483.6	0.00780793	0.00887356	0.0016874
483.8	0.00773646	0.00888629	0.0019299
484	0.00744832	0.00880884	0.00149575
484.2	0.00733139	0.00822097	0.00173504
484.4	0.00761613	0.00761622	0.00162457
484.6	0.00757531	0.00785695	0.00161676
484.8	0.00715317	0.00743457	0.00137345
485	0.00648376	0.00658131	0.00106293
485.2	0.00637553	0.00678141	0.00095118
485.4	0.00649816	0.00675368	0.00060881
485.6	0.0064516	0.00654931	0.0006285
485.8	0.00677483	0.00658854	0.00071458
486	0.00710913	0.00702096	0.00114526
486.2	0.00688099	0.00745984	0.00073078
486.4	0.00745816	0.00803119	0.0005622
486.6	0.00708575	0.00814572	0.00072548
486.8	0.00804962	0.00883281	0.00099117
487	0.00802294	0.00879886	0.00087763
487.2	0.00738461	0.00834625	0.001873
487.4	0.00742674	0.00804917	0.0017197
487.6	0.00691044	0.00768064	0.00201146
487.8	0.00699146	0.00828975	0.00229297
488	0.00683971	0.00771304	0.0021168
488.2	0.00679647	0.00727462	0.0020243
488.4	0.00620047	0.00641688	0.00195965
488.6	0.00640094	0.00707522	0.0023986
488.8	0.00634387	0.00725375	0.00197181
489	0.00644243	0.00716753	0.00189935
489.2	0.00734932	0.00798644	0.00207658
489.4	0.00717544	0.00770191	0.00189076
489.6	0.00751589	0.00763241	0.00219853
489.8	0.00794755	0.008085	0.00231663
490	0.00788445	0.00859005	0.00268492
490.2	0.00845859	0.00897343	0.00290252
490.4	0.00895039	0.00887108	0.00333663
490.6	0.00841754	0.00872233	0.00335601
490.8	0.00810314	0.00874429	0.00289894
491	0.00705755	0.0080038	0.00218492
491.2	0.00671628	0.00792567	0.00225675
491.4	0.00659996	0.0072543	0.00122447
491.6	0.00602351	0.00745973	0.00150825
491.8	0.00608012	0.00730483	0.00095991
492	0.00588577	0.0067505	0.00102036
492.2	0.00558949	0.00636625	0.0012608
492.4	0.00573036	0.00632666	0.00169286
492.6	0.00603858	0.00725895	0.00184175
492.8	0.00570048	0.00734865	0.00156603
493	0.00613999	0.0075844	0.00186967
493.2	0.00685748	0.00794515	0.00179711
493.4	0.00664308	0.00779964	0.00192801
493.6	0.00713827	0.00781661	0.00171797
493.8	0.00723143	0.00818216	0.00184072
494	0.00738361	0.00802682	0.00216535
494.2	0.00782863	0.00834166	0.00223582
494.4	0.00751007	0.00794155	0.00223567
494.6	0.00702645	0.00787861	0.0018109
494.8	0.00640718	0.00739384	0.00105512
495	0.00570122	0.00683492	3.295e-05
495.2	0.00595284	0.0071479	0.00018941
495.4	0.00568434	0.00640961	0.00034761
495.6	0.00544281	0.0066533	0.00074463
495.8	0.00595895	0.00649704	0.00084478
496	0.00611156	0.00649815	0.00126798
496.2	0.0063167	0.00650522	0.00173746
496.4	0.00631753	0.00646832	0.00147872
496.6	0.00579607	0.00640499	0.00106915
496.8	0.00614712	0.00672953	0.00111799
497	0.00667266	0.00704312	0.00081482
497.2	0.00674819	0.00661136	0.00022485
497.4	0.00715657	0.00658748	0.00035946
497.6	0.00749213	0.00679709	-0.00014482
497.8	0.00757192	0.00685064	-0.00033714
498	0.00781086	0.00676601	-0.00036242
498.2	0.00810396	0.00688024	-0.00047218
498.4	0.00781404	0.00649452	6.53e-06
498.6	0.0079129	0.00655486	-4.165e-05
498.8	0.00750853	0.0061065	-0.00026581
499	0.00750186	0.00641661	7.307e-05
499.2	0.00817412	0.00725609	0.0013364
499.4	0.00815577	0.00720071	0.00202517
499.6	0.00855146	0.00774409	0.00238349
499.8	0.00882681	0.00799925	0.00284007
500	0.00804927	0.00759204	0.00295352
500.2	0.00780085	0.00820155	0.00358371
500.4	0.00784043	0.00829496	0.00347992
500.6	0.00749875	0.00872946	0.00349754
500.8	0.00737654	0.00893928	0.00347362
501	0.00653498	0.00822041	0.00266923
501.2	0.00632021	0.00771052	0.00254747
501.4	0.00648419	0.00761298	0.00247604
501.6	0.00613222	0.00797635	0.00188989
501.8	0.0054205	0.00757355	0.00114647
502	0.00466146	0.00698132	0.00085919
502.2	0.00467262	0.00658567	0.00066094
502.4	0.00432562	0.00662292	0.00093201
502.6	0.00446082	0.00651564	0.00063548
502.8	0.00470836	0.00665658	0.00091189
503	0.00430206	0.00689938	0.00043403
503.2	0.0043062	0.0066353	0.0003055
503.4	0.00417281	0.00646013	-0.0001108
503.6	0.00453062	0.00621658	-0.00025591
503.8	0.00468557	0.00599796	-0.00031851
504	0.00419513	0.00564575	-0.0002128
504.2	0.00474608	0.00635675	0.00043074
504.4	0.00519467	0.00600726	0.00010148
504.6	0.00493078	0.00618354	-6.81e-05
504.8	0.00467948	0.0055247	-0.00039992
505	0.00470348	0.0051513	-0.00051062
505.2	0.00535898	0.00586004	-0.00021043
505.4	0.00554171	0.00643549	-0.00014082
505.6	0.00567172	0.00720421	-0.00010027
505.8	0.00557313	0.0068187	-0.00020464
506	0.00554817	0.00695066	2.897e-05
506.2	0.00620237	0.00735374	0.00039376
506.4	0.00621932	0.00790758	0.0005182
506.6	0.00666262	0.00838257	0.00075211
506.8	0.00713127	0.00871632	0.00077332
507	0.00665819	0.00797001	0.00022642
507.2	0.00693835	0.0076342	0.00096849
507.4	0.00747029	0.00824583	0.00162318
507.6	0.00795726	0.00817136	0.00183684
507.8	0.00781497	0.00787505	0.00184911
508	0.00743049	0.00754493	0.00199383
508.2	0.00767131	0.00745105	0.00194175
508.4	0.00765991	0.00692585	0.00155761
508.6	0.00748616	0.00674893	0.00126473
508.8	0.00742569	0.00623714	0.00103656
509	0.00762944	0.00622751	0.00092248
509.2	0.00776989	0.00642429	0.00069638
509.4	0.00779868	0.00630305	0.00064741
509.6	0.00774992	0.00587366	0.00026472
509.8	0.00752694	0.00533921	-9.704e-05
510	0.00752694	0.00533921	-9.704e-05
510.2	0.00840156	0.00596529	0.00086169
510.4	0.00932677	0.00635735	0.00107263
510.6	0.010265	0.00697821	0.00168479
510.8	0.0104508	0.00680732	0.00197758
511	0.00998282	0.00640919	0.00181243
511.2	0.00987343	0.00602455	0.00169012
511.4	0.00993016	0.0058303	0.00160498
511.6	0.00967423	0.00555809	0.00120319
511.8	0.0091932	0.00533851	0.00056167
512	0.00866646	0.0054701	-2.273e-05
512.2	0.00767897	0.00527902	-0.00070794
512.4	0.00776663	0.00552501	-0.00074836
512.6	0.0073426	0.0053135	-0.00083452
512.8	0.00737225	0.00536555	-0.00065418
513	0.00721703	0.00522149	-0.00091192
513.2	0.00716349	0.00533419	-0.00046143
513.4	0.00716527	0.00566145	-0.00028984
513.6	0.00715867	0.00617593	-9.346e-05
513.8	0.00769929	0.00635342	0.00035999
514	0.00749447	0.00609424	0.00041211
514.2	0.00800493	0.00682926	0.00083671
514.4	0.00800587	0.00688027	0.0009633
514.6	0.00771385	0.00669994	0.00150258
514.8	0.00663884	0.00566317	0.00135837
515	0.00588167	0.00491766	0.00120715
515.2	0.00633515	0.00451188	0.0016359
515.4	0.0061095	0.00405081	0.00119543
515.6	0.00613483	0.00383949	0.00089706
515.8	0.00623049	0.00427348	0.00079838
516	0.00630762	0.00443928	0.00105287
516.2	0.00621983	0.0047539	0.00141781
516.4	0.00646811	0.0046329	0.00164551
516.6	0.00643492	0.00459451	0.00193522
516.8	0.00695037	0.00474724	0.00182137
517	0.00662189	0.00463629	0.00146397
517.2	0.00640664	0.00466007	0.0012884
517.4	0.00652916	0.00526953	0.00143989
517.6	0.00673234	0.00560386	0.00139349
517.8	0.00668828	0.00523152	0.00122798
518	0.0066801	0.00488182	0.00091015
518.2	0.00682087	0.0051034	0.00100372
518.4	0.00639219	0.00541168	0.00168293
518.6	0.00633737	0.00510532	0.0019095
518.8	0.00650615	0.00504649	0.00188932
519	0.00665239	0.00493485	0.00229185
519.2	0.00703709	0.00457051	0.00229258
519.4	0.00721795	0.00415834	0.00204827
519.6	0.00809052	0.00440629	0.00237333
519.8	0.00826313	0.00466705	0.00294199
520	0.00818121	0.0044322	0.00265889
520.2	0.0075649	0.00421441	0.00246436
520.4	0.0072116	0.00321631	0.00221863
520.6	0.00659745	0.0032197	0.00206076
520.8	0.00686168	0.00361934	0.00230062
521	0.00626029	0.00374152	0.00217317
521.2	0.00594048	0.00357253	0.00180582
521.4	0.00570899	0.00353228	0.00192769
521.6	0.00543918	0.00339971	0.00140319
521.8	0.00466764	0.00255045	0.00099316
522	0.0043056	0.00259671	0.00100349
522.2	0.00401	0.0028449	0.00073293
522.4	0.00432446	0.0032525	0.00118847
522.6	0.00475023	0.00355001	0.00160691
522.8	0.00517226	0.00413538	0.00161692
523	0.00487866	0.00381106	0.0013745
523.2	0.00567085	0.0038955	0.0017071
523.4	0.00560984	0.00341652	0.00146215
523.6	0.0057639	0.0034767	0.00162845
523.8	0.00535752	0.00329062	0.00171019
524	0.00491136	0.00309571	0.00086393
524.2	0.00468331	0.00354738	0.00077282
524.4	0.00481185	0.00392921	0.00098143
524.6	0.00506954	0.00453536	0.00148402
524.8	0.00493864	0.00450831	0.00124168
525	0.00472478	0.00459744	0.00147365
525.2	0.00437414	0.00411434	0.00128159
525.4	0.00481161	0.00415079	0.00156438
525.6	0.0052362	0.00422219	0.00144166
525.8	0.00484605	0.00417552	0.00129285
526	0.00532457	0.0045517	0.00151556
526.2	0.00609005	0.00557109	0.00199026
526.4	0.00651338	0.00625409	0.00249498
526.6	0.00686534	0.006657	0.00285466
526.8	0.00734836	0.00693324	0.00287906
527	0.00707345	0.00653411	0.00237687
527.2	0.00712428	0.00590609	0.00230937
527.4	0.00631502	0.00532111	0.00136001
527.6	0.00629981	0.00564396	0.00165146
527.8	0.00606433	0.00553183	0.00083132
528	0.00601052	0.00519046	0.00039793
528.2	0.00632101	0.00549094	0.00057009
528.4	0.00583754	0.00468937	0.00071218
528.6	0.00551479	0.00418219	0.00098341
528.8	0.00536271	0.00344348	0.00047692
529	0.00551191	0.00365366	0.00145225
529.2	0.00508917	0.00293367	0.00115434
529.4	0.00541493	0.00246394	0.00124035
529.6	0.00547743	0.0028535	0.00154315
529.8	0.00537834	0.00314835	0.0021318
530	0.00557527	0.00356857	0.0030287
530.2	0.00612233	0.0040958	0.00368461
530.4	0.00601538	0.00394422	0.00360852
530.6	0.00613031	0.00366435	0.00365446
530.8	0.00614924	0.00396856	0.00342187
531	0.00600006	0.00401986	0.00286646
531.2	0.00572618	0.00379085	0.00213867
531.4	0.00542258	0.00451435	0.00210047
531.6	0.00555923	0.0046349	0.00202974
531.8	0.00528365	0.00464813	0.00132284
532	0.00509128	0.00459737	0.00161196
532.2	0.004851	0.00506097	0.00171474
532.4	0.00420272	0.00483701	0.00146056
532.6	0.00430915	0.0051044	0.00182691
532.8	0.00497008	0.00519359	0.00155002
533	0.00428403	0.00458747	0.00139345
533.2	0.00418875	0.00418986	0.00114723
533.4	0.00420172	0.00403465	0.0009759
533.6	0.00420038	0.00422201	0.00089171
533.8	0.0046049	0.00413169	0.00185755
534	0.00513977	0.00421648	0.00227061
534.2	0.00574665	0.00384003	0.0020562
534.4	0.00568889	0.00387531	0.00203686
534.6	0.00536861	0.00349336	0.00177257
534.8	0.00539062	0.00423316	0.00221787
535	0.00565742	0.00435526	0.00252768
535.2	0.00515015	0.00496591	0.00222778
535.4	0.0052607	0.00554331	0.0027068
535.6	0.00533243	0.0059308	0.00266143
535.8	0.0049642	0.00643583	0.00285749
536	0.00515506	0.00650426	0.00322507
536.2	0.00536906	0.00681773	0.00285532
536.4	0.00558175	0.00704841	0.00274919
536.6	0.00547464	0.00677774	0.00277697
536.8	0.00534676	0.00627287	0.00195835
537	0.00504639	0.00589467	0.00173569
537.2	0.00495312	0.00612312	0.00170806
537.4	0.00498704	0.00623819	0.00136767
537.6	0.00496842	0.0058063	0.00128755
537.8	0.00558229	0.00609874	0.00215404
538	0.00611574	0.00618532	0.00180574
538.2	0.00565884	0.00606504	0.00118166
538.4	0.00511023	0.00578068	0.00116082
538.6	0.00450845	0.00513521	0.00085225
538.8	0.00475148	0.00582135	0.0010606
539	0.00508393	0.00602412	0.0012042
539.2	0.00506176	0.00663731	0.00118011
539.4	0.00530682	0.00642539	0.00144578
539.6	0.00506902	0.00645487	0.00169156
539.8	0.00477351	0.0063361	0.00157755
540	0.00458305	0.00608318	0.00157902
540.2	0.00399627	0.00600196	0.00084924
540.4	0.00339597	0.00567741	0.00097301
540.6	0.00285687	0.00485163	0.00115972
540.8	0.0023688	0.00460876	0.00119178
541	0.00218469	0.00452503	0.00172483
541.2	0.00198127	0.00433959	0.00197962
541.4	0.00192436	0.00418296	0.00182186
541.6	0.00170692	0.00388939	0.00181161
541.8	0.00210744	0.00397191	0.00165881
542	0.00167873	0.00376252	0.00111705
542.2	0.00095355	0.00298208	0.00022556
542.4	0.00121853	0.00263015	0.00011596
542.6	0.00187815	0.00250294	1.435e-05
542.8	0.00263499	0.0031455	-0.00030177
543	0.00285378	0.00341676	-0.00014491
543.2	0.00343285	0.00341199	-0.0001352
543.4	0.0037199	0.00368181	-0.00045639
543.6	0.0040836	0.00437083	-9.583e-05
543.8	0.00398984	0.00448161	-0.0002512
544	0.00394197	0.00457501	-2.703e-05
544.2	0.00359702	0.00457053	-0.00064842
544.4	0.00374271	0.00497988	0.00030597
544.6	0.00359384	0.00500745	0.00060105
544.8	0.00290656	0.00479485	0.00037121
545	0.0027626	0.00501332	0.0006254
545.2	0.00234136	0.00531206	0.00039896
545.4	0.00228254	0.00524123	0.00015595
545.6	0.00209364	0.00522978	5.609e-05
545.8	0.00232667	0.0048923	0.00020371
546	0.00192205	0.00449807	-0.00010014
546.2	0.00236047	0.00404108	-0.00014184
546.4	0.00350003	0.00437857	0.00046325
546.6	0.00424998	0.0042392	0.00101812
546.8	0.00444087	0.00425047	0.00095949
547	0.00450372	0.00378602	0.0007889
547.2	0.00516033	0.00376138	0.00089122
547.4	0.00525584	0.00386942	0.00060981
547.6	0.00563894	0.00382346	0.00124832
547.8	0.00526169	0.00358753	0.00119357
548	0.00501288	0.00409719	0.00133597
548.2	0.00474434	0.00396457	0.00133873
548.4	0.0045041	0.00433424	0.00170495
548.6	0.00393541	0.00416522	0.00141602
548.8	0.00395274	0.00446742	0.00175208
549	0.0032568	0.00427496	0.00166415
549.2	0.00318068	0.00449843	0.00172422
549.4	0.00346648	0.00450002	0.00179553
549.6	0.00368641	0.00466356	0.00188442
549.8	0.00416616	0.00501946	0.00242002
550	0.00407323	0.00516006	0.00282681
550.2	0.00482174	0.00571927	0.00355413
550.4	0.00532671	0.00610495	0.00423347
550.6	0.00525715	0.0061136	0.00425884
550.8	0.00531668	0.00607005	0.00424138
551	0.00591328	0.0062292	0.00444215
551.2	0.00627192	0.00677286	0.00472333
551.4	0.00579425	0.00675087	0.00454318
551.6	0.00619333	0.00674022	0.00458322
551.8	0.00609495	0.00683644	0.00416584
552	0.00571879	0.00720238	0.00370004
552.2	0.00576282	0.00644432	0.00302737
552.4	0.0054986	0.00651299	0.0024993
552.6	0.00491306	0.00635392	0.00213456
552.8	0.00530909	0.00647663	0.00209241
553	0.004142	0.00539814	0.00086903
553.2	0.0044367	0.00622849	0.00087725
553.4	0.00376216	0.00600726	0.00057781
553.6	0.00354876	0.00594506	0.00059413
553.8	0.00321387	0.00570992	0.00037987
554	0.00294136	0.00539356	0.00035382
554.2	0.00298798	0.00523355	0.00043234
554.4	0.00294247	0.00521922	0.00098782
554.6	0.0032813	0.00527091	0.00148597
554.8	0.00368129	0.00542246	0.00216345
555	0.00403416	0.00538992	0.00252812
555.2	0.00378545	0.00516154	0.00236707
555.4	0.00336042	0.0050242	0.00240514
555.6	0.0038502	0.00477338	0.00242677
555.8	0.00370349	0.00501321	0.00234272
556	0.00290621	0.00502886	0.00225642
556.2	0.00315538	0.00499843	0.00248361
556.4	0.00270038	0.00546287	0.00236694
556.6	0.0026838	0.00549478	0.00230795
556.8	0.00275174	0.00540927	0.00202223
557	0.00267415	0.00569418	0.00215281
557.2	0.00304188	0.00652498	0.00276616
557.4	0.00270287	0.00610587	0.00290634
557.6	0.00290208	0.00592385	0.00281419
557.8	0.00320304	0.00598219	0.00269378
558	0.00378876	0.00591666	0.00266851
558.2	0.00377464	0.00566394	0.00279039
558.4	0.0043384	0.00583506	0.0030063
558.6	0.00456081	0.00583098	0.00320718
558.8	0.00427367	0.00550631	0.00307192
559	0.00410866	0.00543099	0.00260482
559.2	0.00385969	0.00521205	0.00214046
559.4	0.0036924	0.00482849	0.00216437
559.6	0.00357544	0.00487002	0.0019641
559.8	0.00339908	0.00498332	0.00173195
560	0.00295517	0.00485474	0.0017355
560.2	0.00329067	0.00522822	0.00170585
560.4	0.00323316	0.00499492	0.00088172
560.6	0.00314865	0.00439019	0.0003787
560.8	0.00280078	0.00394745	-0.00026545
561	0.0031939	0.00452284	0.00028861
561.2	0.00297536	0.00437433	5.444e-05
561.4	0.00263511	0.00407722	-0.00021652
561.6	0.0029654	0.00414944	0.00018658
561.8	0.00277147	0.00389405	-0.00012673
562	0.00271953	0.00358577	-0.00019671
562.2	0.0025277	0.00352713	0.00020377
562.4	0.00292749	0.00425141	0.00085977
562.6	0.00254144	0.00408037	0.00124596
562.8	0.00216942	0.00404539	0.00147043
563	0.0021035	0.00389287	0.00109129
563.2	0.00241719	0.00385492	0.00145015
563.4	0.00235478	0.00333833	0.00152369
563.6	0.00240142	0.00410575	0.00180179
563.8	0.00250215	0.00411818	0.0011069
564	0.00296011	0.00449085	0.00116463
564.2	0.00292751	0.00455663	0.00123569
564.4	0.00277366	0.00436101	0.0008491
564.6	0.00237577	0.0035215	8.785e-05
564.8	0.00209689	0.00314876	-0.00022358
565	0.0023556	0.00394692	0.00019202
565.2	0.00281883	0.00410316	0.00077367
565.4	0.0028175	0.00417115	0.00113505
565.6	0.00327133	0.00441914	0.00152641
565.8	0.00310516	0.00421466	0.00100441
566	0.00333917	0.00463518	0.0012551
566.2	0.00352195	0.00503721	0.00148212
566.4	0.00319316	0.00484132	0.00144955
566.6	0.00267515	0.00421292	0.00109508
566.8	0.00240943	0.00402398	0.00062646
567	0.00236454	0.00379887	0.00041907
567.2	0.00248664	0.00399022	0.00056176
567.4	0.00264659	0.00377826	0.00069097
567.6	0.00303544	0.00449355	0.00114068
567.8	0.00279823	0.00485893	0.00070969
568	0.00296868	0.00522849	0.00158509
568.2	0.00231227	0.00514694	0.00171573
568.4	0.0021863	0.00520743	0.0016381
568.6	0.00204278	0.00436204	0.00160623
568.8	0.00262547	0.00472409	0.00260926
569	0.00323277	0.00509908	0.00322763
569.2	0.00387277	0.00517536	0.00377594
569.4	0.00385567	0.00529353	0.00357308
569.6	0.00466515	0.00578103	0.00340645
569.8	0.00480319	0.00628985	0.00295664
570	0.00455007	0.00644227	0.00297754
570.2	0.00470176	0.00598601	0.00277682
570.4	0.00433208	0.00537662	0.00219347
570.6	0.00437681	0.00538585	0.0019785
570.8	0.00400152	0.00516404	0.00165197
571	0.00455521	0.00498776	0.00219366
571.2	0.0048166	0.00526881	0.00260534
571.4	0.00561169	0.00566152	0.00342446
571.6	0.00545714	0.00606294	0.00311345
571.8	0.00519844	0.00617358	0.00309823
572	0.00539159	0.00643043	0.00347252
572.2	0.00428339	0.00558891	0.00278727
572.4	0.00422328	0.00581913	0.00293273
572.6	0.00416094	0.00517225	0.00290112
572.8	0.00460977	0.00525166	0.00267101
573	0.00403318	0.00521361	0.00226341
573.2	0.00401703	0.00550978	0.00253439
573.4	0.00375079	0.00550335	0.00222484
573.6	0.00407047	0.00603449	0.00244939
573.8	0.00385886	0.00588181	0.00227227
574	0.00360551	0.00518242	0.001962
574.2	0.00374533	0.00474974	0.00186028
574.4	0.00342617	0.00439449	0.00150818
574.6	0.00335757	0.00426845	0.00142278
574.8	0.00302648	0.00429163	0.00073014
575	0.00372222	0.00430174	0.0011122
575.2	0.0032968	0.00456018	0.00089245
575.4	0.0037939	0.00489137	0.00118191
575.6	0.00389945	0.00544539	0.0011269
575.8	0.00402577	0.0053443	0.00172272
576	0.00437773	0.0058664	0.00245312
576.2	0.00378751	0.0051771	0.00200945
576.4	0.00435842	0.00594122	0.00255399
576.6	0.0042768	0.00583042	0.0025958
576.8	0.00434025	0.00617131	0.00306903
577	0.00402729	0.00600705	0.00321851
577.2	0.00400438	0.0056028	0.00350062
577.4	0.00453549	0.00575425	0.003865
577.6	0.00485604	0.00618186	0.00433874
577.8	0.00467125	0.00547787	0.0037686
578	0.00488137	0.00522121	0.00354933
578.2	0.00454382	0.00511168	0.00311501
578.4	0.00397914	0.00449467	0.00254361
578.6	0.0036797	0.0046336	0.00234707
578.8	0.0031012	0.00404753	0.00140052
579	0.00285502	0.0033795	0.00105472
579.2	0.00229264	0.00307742	0.00056674
579.4	0.00276129	0.00338342	0.00083277
579.6	0.00331823	0.00322096	0.00133032
579.8	0.00321984	0.0031871	0.00169465
580	0.00354195	0.00348458	0.00184221
580.2	0.00314058	0.00331541	0.00137786
580.4	0.00359843	0.00389135	0.00147094
580.6	0.00338726	0.00392663	0.00157062
580.8	0.00328418	0.00358529	0.0017827
581	0.00342103	0.00347148	0.00174727
581.2	0.00344143	0.00398937	0.00223498
581.4	0.0036953	0.00461101	0.00267768
581.6	0.00361375	0.00466484	0.00271822
581.8	0.00365465	0.00450593	0.00287721
582	0.00366611	0.00467205	0.00327332
582.2	0.00330605	0.00469419	0.00290126
582.4	0.00366048	0.00472162	0.00341913
582.6	0.00381625	0.00449386	0.00340296
582.8	0.00401428	0.00402515	0.00359768
583	0.00407523	0.0039369	0.00324018
583.2	0.00402331	0.00384135	0.0029668
583.4	0.00464654	0.00377638	0.00301401
583.6	0.005007	0.00370655	0.00298454
583.8	0.00471071	0.00369323	0.00239707
584	0.00469077	0.00345061	0.00196558
584.2	0.00497044	0.00389228	0.00213116
584.4	0.00547047	0.00420497	0.00214652
584.6	0.00531888	0.00412982	0.00233179
584.8	0.00540404	0.00407071	0.00208227
585	0.00586353	0.00446856	0.00204311
585.2	0.00587724	0.00451034	0.00169012
585.4	0.00577007	0.00439664	0.00135374
585.6	0.00611896	0.00405501	0.00164392
585.8	0.006089	0.00390469	0.00164839
586	0.0061496	0.00412625	0.00192617
586.2	0.00609892	0.00381953	0.00139075
586.4	0.00614402	0.00424978	0.00195659
586.6	0.00591549	0.00396621	0.00251738
586.8	0.00631143	0.00402662	0.00310277
587	0.00544925	0.00346142	0.00217265
587.2	0.00501614	0.00343106	0.00184464
587.4	0.00454005	0.00375046	0.0022748
587.6	0.00311848	0.00319946	0.00144332
587.8	0.0026749	0.00306916	0.00161374
588	0.00260271	0.00377779	0.00202399
588.2	0.00286431	0.00398448	0.00209297
588.4	0.00330493	0.00387479	0.00191274
588.6	0.00327504	0.00400031	0.00201735
588.8	0.00337769	0.0038435	0.00112333
589	0.00333728	0.00324742	0.00086958
589.2	0.0034344	0.00306973	0.0005974
589.4	0.00354106	0.00306639	0.00081509
589.6	0.00380549	0.00269519	0.00070938
589.8	0.00393557	0.00277687	0.00052643
590	0.00408273	0.00249036	0.00073539
590.2	0.00372304	0.00206961	0.0002402
590.4	0.00426819	0.00270821	0.0008628
590.6	0.00470233	0.00291295	0.00103169
590.8	0.00479139	0.0028062	0.00118356
591	0.0043554	0.00319615	0.00114688
591.2	0.00425945	0.0034241	0.0012443
591.4	0.00344055	0.00332	0.00118573
591.6	0.00267101	0.00284812	0.00061875
591.8	0.00298436	0.00347683	0.00115764
592	0.00320293	0.00399277	0.00131747
592.2	0.00318341	0.00395354	0.00123923
592.4	0.00324531	0.00418352	0.00187707
592.6	0.00304711	0.00449284	0.00188222
592.8	0.00326217	0.0043358	0.00194191
593	0.00344112	0.00480632	0.00236964
593.2	0.0038281	0.00552399	0.0027406
593.4	0.00390828	0.00606508	0.00324303
593.6	0.00362345	0.00593981	0.00251375
593.8	0.00364406	0.00605023	0.0023161
594	0.00373613	0.00603244	0.00236821
594.2	0.00384528	0.00618489	0.00182371
594.4	0.0043856	0.00666971	0.00178933
594.6	0.00430249	0.00604784	0.00119195
594.8	0.00412493	0.00568353	0.00075724
595	0.00431327	0.0055002	-3.4e-06
595.2	0.00392497	0.00471676	-0.00048525
595.4	0.00310237	0.00418719	-0.00141351
595.6	0.0022106	0.00371172	-0.00174547
595.8	0.00202933	0.00342836	-0.00214143
596	0.00200152	0.00316662	-0.00201503
596.2	0.00217067	0.00291716	-0.00145776
596.4	0.00266887	0.00269739	-0.0007513
596.6	0.00310579	0.00253605	-0.00094452
596.8	0.00315784	0.00286032	-0.00017636
597	0.00300912	0.00303688	-5.105e-05
597.2	0.00261702	0.00288089	0.00062001
597.4	0.00275606	0.0031601	0.00101193
597.6	0.00231829	0.0026134	0.00066422
597.8	0.00247171	0.00273374	0.00140979
598	0.00271009	0.0022961	0.00157628
598.2	0.00300047	0.00238307	0.00167101
598.4	0.00297086	0.00273565	0.00202903
598.6	0.00297577	0.00226265	0.00131464
598.8	0.00334345	0.00300238	0.001663
599	0.00383835	0.00332392	0.00191324
599.2	0.00304969	0.00312754	0.00190424
599.4	0.00270346	0.00334085	0.00144134
599.6	0.0022593	0.00327459	0.00169478
599.8	0.00254023	0.00331445	0.00136914
600	0.00256979	0.00358309	0.001928
600.2	0.00297205	0.00388876	0.00235329
600.4	0.00370238	0.00413577	0.0021687
600.6	0.0036312	0.00446846	0.00194716
600.8	0.0037868	0.00505096	0.0023767
601	0.00351203	0.00434093	0.00204642
601.2	0.00380938	0.00497459	0.00229218
601.4	0.00422323	0.0050536	0.00240433
601.6	0.00383813	0.00463135	0.00235588
601.8	0.00373897	0.00432626	0.00245585
602	0.00426578	0.00401167	0.00209855
602.2	0.00482669	0.00469764	0.00243238
602.4	0.00453905	0.00479379	0.00232937
602.6	0.00501128	0.00513579	0.00225568
602.8	0.00530509	0.00540802	0.00262613
603	0.00516096	0.00513409	0.00210037
603.2	0.00465351	0.00468299	0.0013447
603.4	0.00463995	0.00518249	0.00125738
603.6	0.00493934	0.00557883	0.00180573
603.8	0.00449616	0.00550186	0.00127218
604	0.00399188	0.00596164	0.00180122
604.2	0.00404581	0.00587306	0.00201137
604.4	0.00448003	0.00580027	0.00250822
604.6	0.00429035	0.00578435	0.00245702
604.8	0.00431694	0.00584078	0.00271814
605	0.00383561	0.00541485	0.00247064
605.2	0.00412982	0.00581464	0.00247234
605.4	0.00381563	0.00530984	0.00270769
605.6	0.00346592	0.00445714	0.00245843
605.8	0.00310556	0.00333354	0.00224313
606	0.00375537	0.00313561	0.00264491
606.2	0.00343844	0.00256387	0.00257561
606.4	0.00332925	0.00249142	0.00278995
606.6	0.00361698	0.00270631	0.00290393
606.8	0.0040372	0.00284425	0.00289003
607	0.00402584	0.00273317	0.00275428
607.2	0.00462705	0.00341375	0.00315257
607.4	0.00449938	0.00408181	0.00396819
607.6	0.00446032	0.0044762	0.00445879
607.8	0.00358105	0.00443473	0.00411486
608	0.00314425	0.00420452	0.00408834
608.2	0.00306692	0.00395316	0.00413046
608.4	0.00275198	0.00334971	0.00344432
608.6	0.00267349	0.00367136	0.00299894
608.8	0.00233537	0.00401698	0.00308915
609	0.00205459	0.00399271	0.00246019
609.2	0.00205358	0.00396336	0.00230357
609.4	0.00173086	0.00390223	0.00250864
609.6	0.00117624	0.00266157	0.00161291
609.8	0.00120701	0.00209854	0.00125616
610	0.00192028	0.00234802	0.00139804
610.2	0.00179082	0.001567	0.00080797
610.4	0.00230642	0.00184897	0.00089588
610.6	0.00243509	0.00220865	0.0013289
610.8	0.00287222	0.00226906	0.00156832
611	0.00284906	0.0023876	0.00209257
611.2	0.00301713	0.0029789	0.00243768
611.4	0.00273639	0.00262451	0.00220565
611.6	0.00302841	0.0028464	0.00226825
611.8	0.0034916	0.00292647	0.0021984
612	0.00371353	0.00245802	0.0021119
612.2	0.00433596	0.00282891	0.00203036
612.4	0.00448469	0.00264497	0.00167162
612.6	0.00481284	0.00362661	0.00192263
612.8	0.00458149	0.00330131	0.00160591
613	0.00439165	0.00357125	0.00135138
613.2	0.00398937	0.00343639	0.00066327
613.4	0.00357928	0.00359401	0.0003728
613.6	0.00310797	0.00286859	-0.00036479
613.8	0.00288803	0.00289672	-0.00041636
614	0.00317064	0.00329621	-5.603e-05
614.2	0.00224	0.00272198	-0.00059238
614.4	0.00196991	0.00292184	-0.0001355
614.6	0.00165339	0.0032828	0.00035866
614.8	0.0015252	0.00306432	0.00069139
615	0.00168467	0.00330991	0.00099797
615.2	0.00163693	0.00325821	0.00052632
615.4	0.00217931	0.00286901	0.00109674
615.6	0.00243798	0.00327274	0.00212136
615.8	0.00324228	0.00331671	0.00267809
616	0.00343968	0.00349817	0.00289265
616.2	0.00397332	0.00356502	0.00292311
616.4	0.00409565	0.0031926	0.00271536
616.6	0.0046442	0.00336164	0.0027585
616.8	0.00432065	0.00272653	0.00212101
617	0.00430602	0.00326916	0.00188161
617.2	0.00392947	0.00288606	0.0013402
617.4	0.00359578	0.00304529	0.00183067
617.6	0.00377399	0.00278016	0.0019812
617.8	0.00313575	0.00271612	0.00154744
618	0.003281	0.00330391	0.00165889
618.2	0.00258398	0.00305736	0.00077288
618.4	0.0026463	0.00341814	0.00093524
618.6	0.00266069	0.00355522	0.00062386
618.8	0.00250883	0.00380109	0.00048777
619	0.00220011	0.00391456	-0.00048953
619.2	0.00180322	0.00402783	-0.00077762
619.4	0.00186004	0.00405278	-0.00046582
619.6	0.00177929	0.0039788	-0.00021743
619.8	0.00255368	0.00447229	0.00036705
620	0.00290603	0.00483401	0.00091193
620.2	0.0035148	0.00472217	0.00100206
620.4	0.00366316	0.00467462	0.00092224
620.6	0.00456049	0.00474125	0.00149713
620.8	0.00440729	0.00439486	0.00126102
621	0.00496738	0.0043032	0.00161712
621.2	0.00491721	0.0037809	0.00191555
621.4	0.00505322	0.0036513	0.00210204
621.6	0.00475826	0.00287269	0.00170084
621.8	0.00397018	0.00248448	0.00137503
622	0.0040995	0.00260615	0.00186742
622.2	0.00393096	0.00215141	0.001479
622.4	0.00348942	0.00258114	0.0013787
622.6	0.00321301	0.00257997	0.00093146
622.8	0.00256637	0.0028923	0.00050237
623	0.00169333	0.00240408	-0.00033725
623.2	0.00077355	0.00215755	-0.00106977
623.4	0.00109967	0.00243906	-0.00066926
623.6	0.00084552	0.00235932	-0.00034485
623.8	0.00092697	0.00291562	-6.068e-05
624	0.00131739	0.00376993	0.00066063
624.2	0.00113186	0.00400502	0.00011888
624.4	0.00105817	0.00402586	0.00010309
624.6	0.00191945	0.00455649	0.00066322
624.8	0.0020773	0.00463385	0.00076241
625	0.002569	0.00457056	0.00064898
625.2	0.00212743	0.00438884	0.00024381
625.4	0.00244417	0.00409156	0.00044193
625.6	0.00252584	0.00392114	0.0006711
625.8	0.00326196	0.00431901	0.00165013
626	0.00391099	0.0043277	0.00198987
626.2	0.00376467	0.0039661	0.00193269
626.4	0.0039821	0.00398002	0.00188094
626.6	0.00393412	0.00360036	0.00177329
626.8	0.0036729	0.00344716	0.00130947
627	0.00268167	0.00265941	0.00063864
627.2	0.00239115	0.00273953	0.00029019
627.4	0.00270785	0.00293055	0.00083951
627.6	0.00233296	0.00274867	0.00062068
627.8	0.00231933	0.0030819	0.00069185
628	0.00184822	0.00336858	0.00099105
628.2	0.00165124	0.00311157	0.00049472
628.4	0.00158713	0.00343092	0.00103692
628.6	0.00181343	0.00367179	0.00139425
628.8	0.00140591	0.00311867	0.00070524
629	0.00138372	0.00288281	0.00035158
629.2	0.00180561	0.00350828	0.00048428
629.4	0.00306436	0.0039583	0.00142718
629.6	0.00338991	0.00471381	0.00170101
629.8	0.00404645	0.00490547	0.00169519
630	0.00443264	0.00509728	0.00140912
630.2	0.0045165	0.0053168	0.00134254
630.4	0.00483506	0.00545992	0.00084691
630.6	0.0050895	0.00564522	0.00096752
630.8	0.00558393	0.00565231	0.00099724
631	0.00524041	0.00548468	0.00066577
631.2	0.00515155	0.0055823	0.00075288
631.4	0.00566512	0.0058474	0.0012513
631.6	0.00566638	0.005454	0.00151622
631.8	0.00504397	0.00520353	0.00133863
632	0.00473805	0.00496495	0.00160502
632.2	0.00464351	0.0049753	0.00163213
632.4	0.00389122	0.00448462	0.00138265
632.6	0.00376147	0.00415964	0.00162568
632.8	0.00381842	0.00346807	0.00108909
633	0.00413235	0.00362817	0.00173222
633.2	0.00418027	0.00391406	0.00150796
633.4	0.00443229	0.00401515	0.00186307
633.6	0.00410753	0.00450265	0.0013489
633.8	0.00416157	0.00447109	0.00121382
634	0.00403409	0.00473786	0.00157954
634.2	0.00372864	0.0046867	0.00167894
634.4	0.00374013	0.00458554	0.00167188
634.6	0.00402363	0.00449555	0.0021992
634.8	0.00407858	0.00436863	0.00218726
635	0.00358635	0.00409388	0.00173673
635.2	0.00371329	0.00406432	0.00216273
635.4	0.00434978	0.00464461	0.00270241
635.6	0.00401633	0.00455993	0.0033051
635.8	0.00411124	0.00435037	0.0030085
636	0.00421081	0.0042652	0.00305564
636.2	0.00352782	0.00363489	0.00216846
636.4	0.00389441	0.0036943	0.00226863
636.6	0.00410855	0.00383599	0.0028585
636.8	0.0039548	0.00360924	0.00223906
637	0.00343019	0.00390597	0.00203615
637.2	0.00296869	0.00406749	0.0018455
637.4	0.0027927	0.00426255	0.00195712
637.6	0.00244307	0.0047548	0.00152441
637.8	0.00235082	0.00497983	0.0018322
638	0.00227724	0.00551938	0.00210343
638.2	0.0024621	0.00584542	0.00206053
638.4	0.00222213	0.00587708	0.00162722
638.6	0.0023362	0.00629335	0.00169923
638.8	0.00229279	0.00631023	0.00160777
639	0.00202999	0.00639901	0.00129532
639.2	0.00221257	0.00663009	0.0017386
639.4	0.00223174	0.0068926	0.00193509
639.6	0.00237737	0.00706127	0.00244635
639.8	0.00258389	0.00670653	0.00198952
640	0.00251148	0.00664279	0.00195796
640.2	0.0024458	0.00612246	0.00143477
640.4	0.00309361	0.00579514	0.0016676
640.6	0.00279371	0.00495783	0.00178318
640.8	0.00301055	0.00496911	0.00161035
641	0.00288873	0.00416221	0.00107656
641.2	0.00302213	0.00406654	0.00142098
641.4	0.00287825	0.00348533	0.00113235
641.6	0.00293186	0.00386869	0.0012299
641.8	0.0028235	0.00376752	0.00125626
642	0.00286242	0.00339557	0.00120785
642.2	0.00271751	0.00278431	0.00102973
642.4	0.00246945	0.00296656	0.00090326
642.6	0.00260954	0.00307438	0.0014753
642.8	0.00231721	0.00341667	0.00160739
643	0.00199286	0.00318774	0.00170748
643.2	0.00214098	0.00343745	0.00217363
643.4	0.00209306	0.00397521	0.00225215
643.6	0.00269462	0.0041652	0.00272126
643.8	0.00316659	0.00449432	0.00312535
644	0.00332765	0.00421534	0.00278116
644.2	0.00363862	0.00372312	0.00241278
644.4	0.00410243	0.00348083	0.00217395
644.6	0.00440308	0.00395723	0.00256384
644.8	0.00491468	0.0043519	0.00226992
645	0.00432528	0.00388127	0.00198613
645.2	0.00416154	0.00401543	0.00223909
645.4	0.00343823	0.00380536	0.00222546
645.6	0.00328536	0.00403557	0.00195502
645.8	0.0030587	0.00423685	0.00135436
646	0.00266375	0.00433909	0.001063
646.2	0.00231787	0.00452827	0.00125398
646.4	0.00280726	0.00523881	0.00184767
646.6	0.00273343	0.00535254	0.00206083
646.8	0.00263637	0.0058526	0.00188088
647	0.0025508	0.00528345	0.00187608
647.2	0.00288419	0.00573346	0.00214029
647.4	0.00281824	0.00546025	0.00224514
647.6	0.00340281	0.00498609	0.00256391
647.8	0.00354155	0.00489878	0.00240265
648	0.00381926	0.0046123	0.00201416
648.2	0.00436973	0.00467288	0.00258239
648.4	0.00416106	0.00489188	0.00259449
648.6	0.00397702	0.00505654	0.00267517
648.8	0.00431758	0.00515458	0.00244825
649	0.00350079	0.00502073	0.00243232
649.2	0.00391196	0.00558658	0.00259383
649.4	0.00388616	0.00579814	0.00288642
649.6	0.00457122	0.00631578	0.00282643
649.8	0.00395443	0.0064904	0.00232826
650	0.00388429	0.00688718	0.00218406
650.2	0.00470422	0.00699341	0.00249347
650.4	0.00482993	0.00718879	0.00279892
650.6	0.00483837	0.00727864	0.00240822
650.8	0.00477047	0.00702115	0.00215161
651	0.0046964	0.00652716	0.00228396
651.2	0.00476859	0.00658801	0.00258513
651.4	0.00449076	0.00597574	0.00244283
651.6	0.00448943	0.00530351	0.0024708
651.8	0.00421752	0.00481112	0.0018906
652	0.00402133	0.00466357	0.00217058
652.2	0.00356629	0.00470976	0.0022189
652.4	0.00318809	0.00468931	0.00153264
652.6	0.00342012	0.00467654	0.00116959
652.8	0.00369856	0.00483001	0.00136026
653	0.00321167	0.00452804	0.00115671
653.2	0.00375052	0.00500027	0.00146758
653.4	0.00353977	0.0048459	0.00183737
653.6	0.00387037	0.00538434	0.00170752
653.8	0.00366834	0.00554684	0.00209147
654	0.0041895	0.00649549	0.00236141
654.2	0.00458559	0.00643669	0.00315496
654.4	0.00410854	0.00644051	0.00332963
654.6	0.00468887	0.00663657	0.00378986
654.8	0.00500463	0.00704777	0.00407348
655	0.00504735	0.00727162	0.00481996
655.2	0.00514703	0.0072616	0.00514876
655.4	0.0047689	0.00658605	0.00488914
655.6	0.00438461	0.00612678	0.00471885
655.8	0.00378017	0.00625325	0.00440813
656	0.0034155	0.00619456	0.00455655
656.2	0.00352391	0.00692562	0.00429786
656.4	0.00356113	0.0066002	0.00367068
656.6	0.00323901	0.00664147	0.00307014
656.8	0.00300356	0.00642047	0.00263642
657	0.00312642	0.00625741	0.00209666
657.2	0.00295516	0.00574088	0.00202908
657.4	0.00257311	0.00584607	0.00182246
657.6	0.00259119	0.00596601	0.00220656
657.8	0.00240897	0.00581684	0.0024476
658	0.00262826	0.00551727	0.00224729
658.2	0.00263964	0.00489639	0.00221563
658.4	0.00266105	0.00504682	0.00273064
658.6	0.00319523	0.00550001	0.00353404
658.8	0.00333131	0.00602647	0.00330802
659	0.00282457	0.00543154	0.00299546
659.2	0.00261981	0.00470244	0.00263244
659.4	0.00236188	0.00436916	0.00225326
659.6	0.00257745	0.00488007	0.00232935
659.8	0.00236222	0.00517817	0.00213095
660	0.00250879	0.00483372	0.0020387
660.2	0.00272737	0.00509145	0.00191846
660.4	0.00290771	0.00502189	0.00144793
660.6	0.00326039	0.00544714	0.0010922
660.8	0.00372277	0.00570853	0.00135957
661	0.00407397	0.00552196	0.00152419
661.2	0.00383982	0.00532869	0.00165713
661.4	0.00382442	0.00589464	0.001494
661.6	0.00368468	0.0058389	0.00167563
661.8	0.00370645	0.00587187	0.00142405
662	0.00426046	0.00608179	0.00177805
662.2	0.00392172	0.00649129	0.00190849
662.4	0.00373633	0.00706046	0.00244348
662.6	0.0031627	0.00714529	0.00211242
662.8	0.00252768	0.00701669	0.00128857
663	0.00179331	0.00633806	0.00071495
663.2	0.00150583	0.00627953	0.00079563
663.4	0.00127316	0.00570215	0.00061443
663.6	0.00140413	0.00569703	0.00087723
663.8	0.00121858	0.00514192	0.00101096
664	0.0017385	0.00475614	0.00142913
664.2	0.00155141	0.00456613	0.00126294
664.4	0.00198358	0.0051415	0.00129544
664.6	0.00170436	0.00475559	0.00105383
664.8	0.00144167	0.00511481	0.00109466
665	0.00143777	0.00480273	0.00085457
665.2	0.00169556	0.00506923	0.0009538
665.4	0.00189548	0.00502811	0.00052497
665.6	0.00241645	0.0055731	0.00059736
665.8	0.00297325	0.00572825	0.00117091
666	0.00337087	0.00609331	0.00156253
666.2	0.00331608	0.00551437	0.00144466
666.4	0.00345268	0.00560588	0.00129245
666.6	0.00314549	0.0050527	0.00121361
666.8	0.00324094	0.00519258	0.00121123
667	0.00353924	0.00527828	0.00141294
667.2	0.00348649	0.00519839	0.00158837
667.4	0.00381716	0.00521443	0.00203036
667.6	0.00459679	0.00564529	0.00282863
667.8	0.00482864	0.0059535	0.00312382
668	0.00499046	0.00563481	0.00282607
668.2	0.00477488	0.00573715	0.0026991
668.4	0.00463955	0.00641717	0.00285673
668.6	0.00392123	0.00620178	0.00227188
668.8	0.00317166	0.00606039	0.00204412
669	0.00290333	0.00591558	0.0020588
669.2	0.00283171	0.00558215	0.00228998
669.4	0.00260349	0.00516432	0.00205463
669.6	0.00246795	0.00499248	0.00196341
669.8	0.00222497	0.00457245	0.00242968
670	0.00174814	0.00413103	0.00230393
670.2	0.00162583	0.00383028	0.00200715
670.4	0.00170898	0.00411734	0.00224011
670.6	0.00128231	0.00333654	0.0023387
670.8	0.00134002	0.00365327	0.0025248
671	0.00178315	0.00398723	0.00262856
671.2	0.00187014	0.00414212	0.0025044
671.4	0.00236829	0.00466174	0.00267592
671.6	0.00301377	0.00487076	0.00255803
671.8	0.00338233	0.005113	0.00223236
672	0.00387226	0.00525117	0.00215173
672.2	0.00455879	0.00604251	0.00221837
672.4	0.00442517	0.00627017	0.00196387
672.6	0.00459181	0.00637647	0.00190088
672.8	0.00417622	0.00623541	0.0021328
673	0.00404335	0.00593949	0.00153873
673.2	0.00390522	0.00540007	0.00143866
673.4	0.0038279	0.00545489	0.00149391
673.6	0.00352823	0.00566451	0.00165338
673.8	0.00355427	0.00610734	0.00227042
674	0.00327333	0.00599351	0.00224153
674.2	0.00350447	0.00605043	0.00268761
674.4	0.00327186	0.00551061	0.00301765
674.6	0.002482	0.0049428	0.00280548
674.8	0.00275574	0.00498719	0.00348364
675	0.00292199	0.00501839	0.00376984
675.2	0.00302083	0.00540028	0.00379459
675.4	0.00357305	0.00607357	0.00427116
675.6	0.00397094	0.00658888	0.00414762
675.8	0.00405954	0.00639687	0.00413175
676	0.0043541	0.00631747	0.00420277
676.2	0.00472806	0.0066368	0.00436178
676.4	0.00533906	0.00698341	0.00454901
676.6	0.00530904	0.00685395	0.00453443
676.8	0.00461079	0.00630435	0.003873
677	0.00363122	0.00543024	0.00293142
677.2	0.00321021	0.00497507	0.00257511
677.4	0.00301339	0.00492052	0.00231656
677.6	0.00325277	0.00501916	0.00230157
677.8	0.00341519	0.00581912	0.00247241
678	0.00323634	0.00550925	0.00219209
678.2	0.00349457	0.0055938	0.00250801
678.4	0.00299206	0.00558719	0.00192662
678.6	0.00247174	0.00576359	0.0017499
678.8	0.00302403	0.0058133	0.00207156
679	0.00318449	0.00654482	0.00213409
679.2	0.00320197	0.00734429	0.00197135
679.4	0.00354803	0.00780972	0.0022605
679.6	0.00371714	0.00800595	0.00208132
679.8	0.00394301	0.00735694	0.00241724
680	0.00439412	0.00747347	0.00277715
680.2	0.00493168	0.00771904	0.00310797
680.4	0.00556955	0.00750186	0.00297712
680.6	0.00498784	0.00738889	0.00345926
680.8	0.00451526	0.00665443	0.00315775
681	0.00406513	0.00639056	0.00288474
681.2	0.00376034	0.00596506	0.00292141
681.4	0.00357573	0.00630203	0.00353236
681.6	0.00435555	0.00669297	0.00394112
681.8	0.00391562	0.00691911	0.00402228
682	0.00330252	0.00638022	0.00383656
682.2	0.0031173	0.00671238	0.00335407
682.4	0.00232895	0.00630235	0.00252733
682.6	0.00216779	0.00642277	0.0028599
682.8	0.00254784	0.00636887	0.00244567
683	0.00224211	0.00644521	0.00258769
683.2	0.00173556	0.00608844	0.00220527
683.4	0.00208137	0.00601517	0.00250356
683.6	0.00176693	0.00539828	0.00186372
683.8	0.00122665	0.00440839	0.00157099
684	0.00120046	0.00430848	0.00107386
684.2	0.00140616	0.00407722	0.00106428
684.4	0.00114143	0.00399732	0.00103119
684.6	0.00148034	0.00455579	0.00188108
684.8	0.00160767	0.00448083	0.00147903
685	0.00175872	0.00475509	0.00157806
685.2	0.00144506	0.00458401	0.00204724
685.4	0.00210851	0.00484489	0.00198734
685.6	0.00219043	0.00453745	0.00130683
685.8	0.00197436	0.00448805	0.00138324
686	0.00158251	0.00457696	0.00092781
686.2	0.00204179	0.00525005	0.00103516
686.4	0.00259799	0.0048054	0.00143955
686.6	0.00349335	0.00555451	0.00186455
686.8	0.00350991	0.00527611	0.00147972
687	0.00359364	0.00550661	0.00171646
687.2	0.00358618	0.00551624	0.00165938
687.4	0.00350104	0.00558548	0.00163089
687.6	0.00331467	0.00570655	0.001129
687.8	0.00340215	0.00579395	0.00171761
688	0.00357346	0.0059206	0.00174005
688.2	0.00356257	0.00608288	0.00178963
688.4	0.00367605	0.00647882	0.00226615
688.6	0.0038764	0.00693791	0.00259455
688.8	0.00333034	0.00635902	0.00216144
689	0.00280266	0.00558617	0.00203178
689.2	0.00249769	0.00547007	0.00237088
689.4	0.0027018	0.00529726	0.00239912
689.6	0.00223056	0.00484822	0.00226392
689.8	0.00232169	0.00452035	0.00279409
690	0.00271391	0.00420781	0.00290957
690.2	0.00299452	0.00419819	0.00317154
690.4	0.00353846	0.00408671	0.00309935
690.6	0.00333305	0.00404004	0.00284458
690.8	0.00341064	0.00405869	0.00299067
691	0.00384262	0.00442791	0.00319195
691.2	0.00423407	0.0049925	0.00318669
691.4	0.00438051	0.0056362	0.0036883
691.6	0.00439578	0.00577572	0.00350491
691.8	0.0042922	0.00590391	0.00387371
692	0.00389842	0.00613827	0.00355662
692.2	0.00373023	0.00637938	0.00332529
692.4	0.00318432	0.00623797	0.00319658
692.6	0.00248267	0.00605481	0.00279415
692.8	0.00185579	0.00541204	0.00235249
693	0.00147328	0.00562998	0.00233196
693.2	0.00185349	0.00570285	0.00247532
693.4	0.00192642	0.00569665	0.00221196
693.6	0.00196615	0.00545132	0.00197336
693.8	0.00224665	0.00519204	0.00185852
694	0.00265036	0.00498599	0.00154529
694.2	0.00272346	0.00542749	0.001258
694.4	0.0037358	0.0059482	0.0017128
694.6	0.00411941	0.005978	0.00169276
694.8	0.00478439	0.00644295	0.00216399
695	0.00468687	0.00661943	0.00192911
695.2	0.00494779	0.00710099	0.00196207
695.4	0.00473702	0.00692226	0.00237699
695.6	0.00476075	0.00678462	0.00262184
695.8	0.0047807	0.00688248	0.00319044
696	0.00442722	0.00688474	0.00316744
696.2	0.00428995	0.00656442	0.00314355
696.4	0.0037701	0.00597866	0.00308953
696.6	0.00298066	0.00568489	0.00298641
696.8	0.0018717	0.00482971	0.00258655
697	0.00170891	0.00459373	0.00281427
697.2	0.00204677	0.0043555	0.00279799
697.4	0.00189962	0.00438839	0.00278029
697.6	0.00183086	0.00450721	0.00263073
697.8	0.00195644	0.00449329	0.00227335
698	0.00227681	0.00481838	0.00227534
698.2	0.00340336	0.00589701	0.00276279
698.4	0.00384605	0.00630524	0.00342967
698.6	0.00365337	0.00613138	0.00316295
698.8	0.00347868	0.00627935	0.00332212
699	0.00353119	0.00609276	0.00267772
699.2	0.00315463	0.00542491	0.00246859
699.4	0.00286388	0.00491757	0.00190958
699.6	0.00274301	0.00481826	0.0018968
699.8	0.00251573	0.00464277	0.00215259
700	0.00251079	0.00466203	0.00213167
700.2	0.00247617	0.00434159	0.00207057
700.4	0.00215073	0.00399067	0.0023678
700.6	0.0018834	0.00424932	0.00285806
700.8	0.00198594	0.0044179	0.00327225
701	0.0026466	0.00476657	0.00344361
701.2	0.00309779	0.00502187	0.00390641
701.4	0.00294458	0.00547026	0.00406217
701.6	0.00306953	0.00571735	0.00418644
701.8	0.00363158	0.00622354	0.00408673
702	0.0038796	0.00642572	0.0041125
702.2	0.00433674	0.00667524	0.00450173
702.4	0.00408702	0.00666818	0.00444888
702.6	0.00398997	0.00625686	0.00380634
702.8	0.00394257	0.00627699	0.00366719
703	0.00357853	0.00533859	0.00258022
703.2	0.00300036	0.00463508	0.00182552
703.4	0.00299218	0.00473327	0.00139288
703.6	0.00294544	0.00453701	0.00169725
703.8	0.00282768	0.0045854	0.00224617
704	0.00278401	0.00422225	0.00199019
704.2	0.00253751	0.00426228	0.00243603
704.4	0.00216801	0.0045927	0.00306162
704.6	0.00222988	0.00527744	0.00340903
704.8	0.00212677	0.00521349	0.00369657
705	0.00228106	0.00562948	0.00424797
705.2	0.00223409	0.00596838	0.00492231
705.4	0.00216757	0.00629899	0.00488858
705.6	0.00280865	0.00653748	0.00515657
705.8	0.00362579	0.00727474	0.00495221
706	0.00380373	0.00693644	0.00492256
706.2	0.00426039	0.00725084	0.00551192
706.4	0.00490196	0.00798684	0.00580327
706.6	0.00570326	0.00785501	0.00599381
706.8	0.00600542	0.0078375	0.00567384
707	0.00624107	0.00778905	0.00479906
707.2	0.00683005	0.00779799	0.00477394
707.4	0.00671435	0.00810081	0.00491463
707.6	0.00610559	0.00720375	0.0044115
707.8	0.0058977	0.00751039	0.00418763
708	0.00586126	0.00728453	0.00388947
708.2	0.00537308	0.00744468	0.00393297
708.4	0.00456007	0.00747226	0.0036763
708.6	0.00456823	0.00789095	0.00369759
708.8	0.00401925	0.00758596	0.00421753
709	0.00362401	0.00798232	0.00432634
709.2	0.00309213	0.00772113	0.00411599
709.4	0.0028967	0.00733906	0.00432103
709.6	0.00263808	0.00683832	0.00443347
[truncated: 1,001 more rows]

## Sheet: fig_s5_pDAm15_2DT2
Time1	1E-05	2.5E-06	6.25E-07
310	0.0098635	-0.00161189	0.00106824
310.2	0.0103982	-0.00115917	0.00135417
310.4	0.0117023	-0.00022211	0.00221768
310.6	0.0125436	0.00029392	0.00248893
310.8	0.0131329	0.00078808	0.00275564
311	0.0139967	0.00195007	0.00307166
311.2	0.0154021	0.00281612	0.00352158
311.4	0.0164015	0.00334188	0.00360008
311.6	0.0173987	0.00377016	0.003694
311.8	0.018962	0.00450502	0.00385568
312	0.0206551	0.00520444	0.00394005
312.2	0.0219074	0.00557285	0.00402564
312.4	0.0230738	0.00544591	0.00357148
312.6	0.0242502	0.00595436	0.0035628
312.8	0.0253687	0.00647785	0.00381691
313	0.0261719	0.00626768	0.00308754
313.2	0.0263713	0.00546172	0.0018485
313.4	0.0272408	0.0054031	0.00182899
313.6	0.0281166	0.00591732	0.00167111
313.8	0.0298004	0.00656368	0.00200668
314	0.0310524	0.00713347	0.00191254
314.2	0.0320997	0.00711784	0.00234679
314.4	0.033383	0.00786469	0.00271279
314.6	0.0337959	0.00763321	0.00239564
314.8	0.0349431	0.00827254	0.00258375
315	0.0360829	0.00930137	0.00265571
315.2	0.0372175	0.00907869	0.00297048
315.4	0.0382798	0.00929237	0.00300428
315.6	0.0398236	0.00974856	0.00352419
315.8	0.0416629	0.0106263	0.00396043
316	0.0428323	0.0107576	0.00413023
316.2	0.044047	0.0110486	0.00412562
316.4	0.0452249	0.0112514	0.00405007
316.6	0.0462583	0.0114157	0.00420854
316.8	0.0471775	0.0113543	0.00402211
317	0.0481133	0.011072	0.00378084
317.2	0.0489977	0.0115126	0.00385184
317.4	0.0506099	0.0123041	0.00452177
317.6	0.051511	0.0126147	0.00467175
317.8	0.0527236	0.0133477	0.00567136
318	0.0533711	0.0132982	0.0054832
318.2	0.0542084	0.0132363	0.00570968
318.4	0.0550883	0.0139769	0.00590583
318.6	0.0559619	0.0144594	0.00623344
318.8	0.0569906	0.0147437	0.00606742
319	0.0573436	0.0147287	0.00579738
319.2	0.0579613	0.014336	0.00619425
319.4	0.0586495	0.0145227	0.006241
319.6	0.0593115	0.0144754	0.00601403
319.8	0.0598102	0.0148152	0.00524416
320	0.0603919	0.0146988	0.00516783
320.2	0.0615096	0.015036	0.00518235
320.4	0.0623192	0.014816	0.00533031
320.6	0.0637031	0.0149731	0.00553166
320.8	0.0649191	0.015156	0.00579378
321	0.0660876	0.015767	0.00578591
321.2	0.0668725	0.0163114	0.00623643
321.4	0.0678633	0.0163267	0.00668971
321.6	0.0688936	0.0166643	0.00665934
321.8	0.0697471	0.0173166	0.0069488
322	0.0706671	0.0175234	0.00652368
322.2	0.0719754	0.0184737	0.00744718
322.4	0.0727347	0.0189722	0.00762465
322.6	0.0736713	0.0194199	0.00800312
322.8	0.0746988	0.0193138	0.00784441
323	0.0751857	0.0192908	0.00789861
323.2	0.0763231	0.0192317	0.0083174
323.4	0.0769995	0.019585	0.00830185
323.6	0.0779163	0.01984	0.00822979
323.8	0.0782448	0.0196316	0.0080013
324	0.0790896	0.0199087	0.00857554
324.2	0.0800913	0.0201107	0.00919662
324.4	0.0812037	0.0200997	0.00958659
324.6	0.0825558	0.0208077	0.00994352
324.8	0.0831867	0.0208037	0.00945876
325	0.0838316	0.0212156	0.0090391
325.2	0.0844808	0.0213999	0.00980569
325.4	0.0853335	0.0219017	0.00980851
325.6	0.0863697	0.0222198	0.00941166
325.8	0.0870245	0.0229561	0.00913962
326	0.0884495	0.0237085	0.00888578
326.2	0.0895676	0.0242681	0.00927442
326.4	0.0902134	0.0237957	0.00875459
326.6	0.0908397	0.0241199	0.0088295
326.8	0.0918368	0.0242131	0.00871602
327	0.0927278	0.0240138	0.00822053
327.2	0.0937881	0.0242389	0.0085297
327.4	0.0940082	0.0239506	0.0082319
327.6	0.0943801	0.0236436	0.00790306
327.8	0.0943603	0.0229023	0.00749603
328	0.0948735	0.023451	0.00745025
328.2	0.0952097	0.0233089	0.00781425
328.4	0.0961406	0.0234199	0.00756166
328.6	0.0969613	0.0236618	0.00808151
328.8	0.0973287	0.023822	0.00780513
329	0.0983912	0.0245716	0.00827494
329.2	0.0991989	0.0254957	0.00905715
329.4	0.0999749	0.0258504	0.00915726
329.6	0.100921	0.0260932	0.00890823
329.8	0.101556	0.0263859	0.00887412
330	0.102498	0.0268384	0.00910437
330.2	0.103256	0.026871	0.00982829
330.4	0.1042	0.0265769	0.00983288
330.6	0.104622	0.0266658	0.00972449
330.8	0.105488	0.0265175	0.00957075
331	0.105684	0.0260877	0.00906576
331.2	0.105956	0.0259419	0.00883003
331.4	0.106937	0.0255859	0.00853908
331.6	0.107484	0.0257538	0.00824005
331.8	0.108025	0.025813	0.00774433
332	0.109107	0.026666	0.00761625
332.2	0.110551	0.0269261	0.00817283
332.4	0.112361	0.0282846	0.00884894
332.6	0.113112	0.0286866	0.00917386
332.8	0.114466	0.029732	0.0095379
333	0.115613	0.0305302	0.00982304
333.2	0.116024	0.0309005	0.0101421
333.4	0.116587	0.0312859	0.010292
333.6	0.116871	0.0316984	0.010309
333.8	0.117405	0.0326919	0.0108448
334	0.118151	0.0335089	0.0116308
334.2	0.119116	0.0336925	0.0121185
334.4	0.119486	0.0337946	0.011885
334.6	0.119279	0.0333463	0.011452
334.8	0.119398	0.0329927	0.0112544
335	0.12026	0.0331872	0.0116552
335.2	0.121704	0.0337534	0.011795
335.4	0.122935	0.0340394	0.012135
335.6	0.123061	0.0335526	0.0117353
335.8	0.123849	0.0338524	0.0116976
336	0.124572	0.0332144	0.0113928
336.2	0.125947	0.0327493	0.0113476
336.4	0.126722	0.0328409	0.0113021
336.6	0.127046	0.0324487	0.010747
336.8	0.127976	0.03222	0.0110338
337	0.128435	0.0325221	0.0106278
337.2	0.128858	0.0326502	0.0104221
337.4	0.129479	0.0331623	0.0104073
337.6	0.12986	0.033514	0.0100907
337.8	0.130582	0.0341661	0.00971659
338	0.130979	0.0339326	0.00938521
338.2	0.131741	0.035077	0.00925848
338.4	0.131939	0.0351945	0.00868085
338.6	0.13247	0.0355343	0.00855566
338.8	0.133106	0.0356119	0.00885319
339	0.134448	0.0366775	0.00965385
339.2	0.135464	0.0371916	0.0095694
339.4	0.135755	0.0373729	0.0100212
339.6	0.135429	0.0368695	0.00970051
339.8	0.136061	0.0371939	0.00985658
340	0.136527	0.0362272	0.00946739
340.2	0.137529	0.0365992	0.00974672
340.4	0.137612	0.0365758	0.00999167
340.6	0.138115	0.0373388	0.0104382
340.8	0.138958	0.0372806	0.0111211
341	0.139644	0.0376202	0.0116668
341.2	0.140448	0.0376075	0.0117347
341.4	0.141713	0.0379898	0.0122542
341.6	0.142987	0.0386398	0.0124849
341.8	0.144062	0.0385943	0.0125151
342	0.145013	0.0394184	0.01269
342.2	0.145713	0.0403176	0.0129787
342.4	0.146722	0.0401872	0.0134659
342.6	0.147548	0.0403382	0.0137627
342.8	0.147815	0.0400875	0.0134289
343	0.148989	0.0409447	0.0133705
343.2	0.14955	0.0408882	0.0129355
343.4	0.150352	0.0413988	0.0134094
343.6	0.150417	0.0412423	0.0128397
343.8	0.151377	0.0413614	0.0127402
344	0.151492	0.0410727	0.0125162
344.2	0.152224	0.0414199	0.012195
344.4	0.15264	0.0417972	0.0120613
344.6	0.152988	0.0420443	0.0124415
344.8	0.152915	0.0415411	0.0121235
345	0.15364	0.0418625	0.0122198
345.2	0.155187	0.0425912	0.0125745
345.4	0.156104	0.0432495	0.013136
345.6	0.157374	0.0436635	0.0133704
345.8	0.157529	0.0435018	0.013296
346	0.157856	0.0444349	0.01359
346.2	0.158045	0.0440353	0.0138592
346.4	0.158953	0.0444814	0.0143981
346.6	0.159178	0.0446113	0.0142713
346.8	0.159014	0.0450603	0.0141071
347	0.159436	0.0451958	0.0140739
347.2	0.159698	0.0453027	0.0139948
347.4	0.159939	0.0455902	0.014464
347.6	0.159807	0.0447602	0.0137783
347.8	0.160298	0.0441569	0.013554
348	0.160363	0.0437036	0.0131884
348.2	0.16142	0.0436321	0.0129441
348.4	0.161218	0.0436372	0.0127899
348.6	0.161495	0.043307	0.0131398
348.8	0.161787	0.0435856	0.0126827
349	0.162914	0.0439937	0.0134827
349.2	0.164205	0.0442011	0.0137586
349.4	0.164859	0.044256	0.0136704
349.6	0.166074	0.0444268	0.013951
349.8	0.166608	0.0447399	0.0143195
350	0.167666	0.0450834	0.0144965
350.2	0.16856	0.0452368	0.0149118
350.4	0.169836	0.0458837	0.0154522
350.6	0.170656	0.0461367	0.0153242
350.8	0.170832	0.0467092	0.0151378
351	0.171595	0.0472908	0.0150669
351.2	0.172329	0.0477279	0.0154582
351.4	0.173052	0.0479131	0.0161208
351.6	0.174102	0.0477747	0.0155711
351.8	0.174887	0.047971	0.0158774
352	0.175754	0.0484817	0.0152898
352.2	0.176191	0.0489016	0.0160279
352.4	0.176881	0.049534	0.0163662
352.6	0.177736	0.0501749	0.0167954
352.8	0.177924	0.050353	0.0167631
353	0.178371	0.0498222	0.0173591
353.2	0.17889	0.0503315	0.0175804
353.4	0.178924	0.0504575	0.0173693
353.6	0.179288	0.0508945	0.0173091
353.8	0.179613	0.0511409	0.0171932
354	0.179157	0.0506964	0.0166082
354.2	0.179302	0.0508338	0.0165536
354.4	0.179588	0.0504761	0.0159129
354.6	0.179994	0.0510858	0.0158934
354.8	0.179878	0.0510853	0.0158941
355	0.180774	0.0510505	0.0159947
355.2	0.181368	0.0510938	0.0161593
355.4	0.182334	0.0513422	0.0161033
355.6	0.183196	0.0516361	0.0156548
355.8	0.184306	0.0520578	0.0159712
356	0.185708	0.0533395	0.0163194
356.2	0.186455	0.0537974	0.0167726
356.4	0.187745	0.0539141	0.016907
356.6	0.188259	0.0540399	0.0171501
356.8	0.188918	0.0542956	0.0173228
357	0.189354	0.0542014	0.0175486
357.2	0.18959	0.0548638	0.0175796
357.4	0.189895	0.05453	0.0170407
357.6	0.190512	0.0549614	0.0172073
357.8	0.190402	0.0549222	0.0168038
358	0.190394	0.0540503	0.0166719
358.2	0.191334	0.0543702	0.0170773
358.4	0.191477	0.0537168	0.0167818
358.6	0.191961	0.0540829	0.0172219
358.8	0.191604	0.0530418	0.0165749
359	0.192075	0.0528134	0.0163975
359.2	0.19236	0.0531844	0.0162899
359.4	0.193158	0.0530654	0.0161112
359.6	0.193973	0.0537507	0.0164309
359.8	0.19462	0.0544773	0.0168572
360	0.195575	0.0552953	0.0171255
360.2	0.195875	0.0553029	0.0168954
360.4	0.196626	0.0555754	0.0170151
360.6	0.19763	0.0566537	0.0177327
360.8	0.198291	0.0573202	0.0176922
361	0.198671	0.0573218	0.0178657
361.2	0.199126	0.0579684	0.0183277
361.4	0.199848	0.0584786	0.0186104
361.6	0.199845	0.0585461	0.018374
361.8	0.200077	0.0584748	0.0183217
362	0.200501	0.0577923	0.0185393
362.2	0.200807	0.0575649	0.0183008
362.4	0.201097	0.0570116	0.0178568
362.6	0.201252	0.0572766	0.0178802
362.8	0.200997	0.0568286	0.0176616
363	0.201786	0.0572751	0.0175679
363.2	0.202186	0.0571305	0.0171895
363.4	0.203169	0.0571762	0.0171388
363.6	0.203562	0.0576153	0.0175808
363.8	0.204227	0.0578341	0.0176391
364	0.204553	0.0577335	0.0175455
364.2	0.204943	0.0577654	0.0179312
364.4	0.205579	0.0580919	0.0179308
364.6	0.20576	0.0586367	0.0184394
364.8	0.205474	0.0585171	0.0178678
365	0.206105	0.0590014	0.0183498
365.2	0.206306	0.0591283	0.0186627
365.4	0.206475	0.0592183	0.0183307
365.6	0.206647	0.0590645	0.0182449
365.8	0.206897	0.0592956	0.0183297
366	0.207455	0.0588683	0.0179683
366.2	0.208062	0.0589667	0.0178312
366.4	0.20877	0.0595402	0.0181986
366.6	0.208805	0.0596535	0.018369
366.8	0.209327	0.0596236	0.0181606
367	0.209925	0.0598405	0.0179197
367.2	0.210469	0.0597882	0.0185046
367.4	0.211456	0.0601282	0.0192923
367.6	0.212146	0.0603154	0.019616
367.8	0.213027	0.0604049	0.0197361
368	0.213201	0.0600985	0.0199561
368.2	0.214256	0.060694	0.0203728
368.4	0.214285	0.0608122	0.0198477
368.6	0.214563	0.061032	0.019668
368.8	0.215059	0.0610399	0.0195809
369	0.215876	0.0617023	0.0199128
369.2	0.215986	0.0614154	0.0195777
369.4	0.216858	0.0617225	0.0193874
369.6	0.217434	0.0621461	0.0195198
369.8	0.217825	0.0623541	0.0189889
370	0.218612	0.0627614	0.0186019
370.2	0.218472	0.0630461	0.0183606
370.4	0.218851	0.0633281	0.0182625
370.6	0.219239	0.0633802	0.018492
370.8	0.219262	0.063082	0.0180922
371	0.219698	0.0638437	0.0185606
371.2	0.220785	0.0647816	0.0192629
371.4	0.221536	0.0650369	0.0197138
371.6	0.222377	0.0656301	0.019709
371.8	0.22239	0.065338	0.0198234
372	0.222751	0.0652241	0.0196312
372.2	0.223088	0.0654376	0.0198328
372.4	0.222929	0.0652036	0.0196331
372.6	0.223289	0.0654092	0.0196911
372.8	0.223372	0.0653057	0.0201221
373	0.22339	0.0653199	0.0202865
373.2	0.223778	0.0649295	0.0201702
373.4	0.224104	0.0648714	0.0202319
373.6	0.224653	0.0657725	0.0207248
373.8	0.2252	0.0661562	0.0205301
374	0.225575	0.0666371	0.0202991
374.2	0.2257	0.0665631	0.0202997
374.4	0.226022	0.0661533	0.0200968
374.6	0.226604	0.066259	0.0205439
374.8	0.22682	0.0662823	0.0198196
375	0.228075	0.0672065	0.0202379
375.2	0.228706	0.0676405	0.0202766
375.4	0.228866	0.0670632	0.0204758
375.6	0.229252	0.0670083	0.0201938
375.8	0.229301	0.0664875	0.019942
376	0.229918	0.0664504	0.0195864
376.2	0.229816	0.0662865	0.0195925
376.4	0.22996	0.06621	0.019275
376.6	0.230563	0.0667066	0.0195704
376.8	0.231081	0.0665256	0.0200241
377	0.232225	0.066857	0.0203539
377.2	0.232686	0.0665722	0.0203995
377.4	0.233377	0.0668363	0.0206814
377.6	0.234073	0.0675275	0.0210786
377.8	0.234489	0.0677746	0.0209541
378	0.23495	0.0681228	0.0209867
378.2	0.23503	0.0680789	0.0211393
378.4	0.23586	0.0685078	0.0216679
378.6	0.236316	0.0692789	0.0217701
378.8	0.236619	0.0698561	0.0218054
379	0.236777	0.0701836	0.0217439
379.2	0.236616	0.0704697	0.0216545
379.4	0.236871	0.0703998	0.0220259
379.6	0.236933	0.0705567	0.0216476
379.8	0.237249	0.0707146	0.0214184
380	0.237561	0.0706387	0.0214515
380.2	0.237523	0.0701475	0.021257
380.4	0.237914	0.0699644	0.0206452
380.6	0.238679	0.0703492	0.0204104
380.8	0.238886	0.069354	0.0198842
381	0.239303	0.0692196	0.0201586
381.2	0.239216	0.0684755	0.0198285
381.4	0.240065	0.0688549	0.0200052
381.6	0.240274	0.0693811	0.0200581
381.8	0.241234	0.0698855	0.0205044
382	0.241588	0.0702614	0.0209883
382.2	0.242534	0.0705513	0.021967
382.4	0.243044	0.0710681	0.0222944
382.6	0.242967	0.0713169	0.0217685
382.8	0.243324	0.0715797	0.0217919
383	0.243356	0.072041	0.021264
383.2	0.2438	0.0725457	0.0217853
383.4	0.244411	0.0724085	0.021737
383.6	0.244345	0.0726999	0.0212206
383.8	0.244782	0.0731039	0.0209433
384	0.244924	0.0729389	0.0207041
384.2	0.24481	0.0724724	0.0194741
384.4	0.244935	0.0725661	0.0186127
384.6	0.245303	0.0726544	0.0181078
384.8	0.24526	0.0717009	0.0177934
385	0.245408	0.0716845	0.0180502
385.2	0.246369	0.0713038	0.0183908
385.4	0.247054	0.0713234	0.0186383
385.6	0.24742	0.0715286	0.0189965
385.8	0.248372	0.0713155	0.0196322
386	0.248844	0.0718585	0.0205154
386.2	0.249685	0.0717068	0.0209501
386.4	0.250277	0.0724893	0.0211836
386.6	0.250936	0.0726483	0.0215558
386.8	0.251849	0.0733536	0.0224354
387	0.252435	0.0744196	0.0231295
387.2	0.252712	0.0747832	0.0237653
387.4	0.252943	0.0749607	0.0238553
387.6	0.252549	0.0755274	0.0233315
387.8	0.252877	0.0758144	0.0230717
388	0.253134	0.0759259	0.0228937
388.2	0.253332	0.0759208	0.0223615
388.4	0.253176	0.0760499	0.0220425
388.6	0.253097	0.0758559	0.0217327
388.8	0.252808	0.074946	0.0214544
389	0.25289	0.0751196	0.0215817
389.2	0.253017	0.0741874	0.0212874
389.4	0.252687	0.0740515	0.0206522
389.6	0.252719	0.0739172	0.0204932
389.8	0.25327	0.0740403	0.0207283
390	0.253685	0.0747715	0.0209104
390.2	0.254479	0.0749642	0.0212031
390.4	0.255392	0.0757628	0.0220813
390.6	0.256041	0.0758308	0.0225586
390.8	0.256649	0.0764121	0.0228844
391	0.257245	0.0768207	0.0228449
391.2	0.257389	0.0766299	0.0225619
391.4	0.258061	0.0766055	0.0224543
391.6	0.258575	0.0767404	0.0218939
391.8	0.259382	0.0767824	0.0222929
392	0.260021	0.0772991	0.0225089
392.2	0.260558	0.0777681	0.022997
392.4	0.260754	0.0781788	0.0231088
392.6	0.261393	0.0784728	0.0233203
392.8	0.26184	0.0788693	0.0233504
393	0.261937	0.0792025	0.0231289
393.2	0.261979	0.0789685	0.0231566
393.4	0.262178	0.0794946	0.0231242
393.6	0.262254	0.0798976	0.0231009
393.8	0.262546	0.0801406	0.0233118
394	0.262917	0.0807347	0.0233425
394.2	0.263572	0.081269	0.0237193
394.4	0.263513	0.0811463	0.023685
394.6	0.263832	0.0814178	0.023488
394.8	0.264071	0.0814641	0.0234178
395	0.264666	0.0817968	0.0232822
395.2	0.264376	0.0817199	0.0232306
395.4	0.264653	0.0814313	0.0236939
395.6	0.264785	0.0815552	0.023977
395.8	0.264997	0.0815856	0.0243588
396	0.265344	0.0820592	0.0246914
396.2	0.266073	0.0821564	0.0252076
396.4	0.266666	0.0820336	0.0255249
396.6	0.267443	0.0819419	0.0254679
396.8	0.26777	0.0821741	0.0251994
397	0.268364	0.0821138	0.0254907
397.2	0.268419	0.0818463	0.0255489
397.4	0.268631	0.0821519	0.0248734
397.6	0.268674	0.0823659	0.0249088
397.8	0.269229	0.0823388	0.0246971
398	0.269483	0.0830198	0.0247515
398.2	0.269799	0.0832183	0.0246062
398.4	0.270085	0.0830725	0.0244557
398.6	0.27059	0.0831172	0.0243596
398.8	0.271356	0.0832749	0.0247746
399	0.271734	0.0833875	0.0248879
399.2	0.27111	0.083125	0.0251851
399.4	0.271513	0.082773	0.0254944
399.6	0.271414	0.0828711	0.0254406
399.8	0.272051	0.0827589	0.0256018
400	0.272327	0.0826402	0.0258046
400.2	0.273092	0.0826414	0.0258038
400.4	0.273633	0.0825572	0.0261026
400.6	0.2742	0.0828521	0.0258073
400.8	0.274184	0.0827837	0.0256491
401	0.274655	0.0827358	0.0262955
401.2	0.27425	0.0821984	0.0254808
401.4	0.274471	0.0822976	0.0247337
401.6	0.274826	0.0823108	0.0246947
401.8	0.275447	0.082765	0.0247124
402	0.275646	0.0825428	0.0246851
402.2	0.276205	0.0823673	0.0247121
402.4	0.276755	0.0823041	0.0252336
402.6	0.276958	0.0826182	0.0255198
402.8	0.277696	0.0832469	0.0259207
403	0.277788	0.0839962	0.0262091
403.2	0.27727	0.0839798	0.0264962
403.4	0.277964	0.0846803	0.026616
403.6	0.277727	0.0849112	0.0266526
403.8	0.278345	0.0853146	0.0267452
404	0.278565	0.0856014	0.0266764
404.2	0.278841	0.0859641	0.0263443
404.4	0.279427	0.0858775	0.0264892
404.6	0.279556	0.0859184	0.0262711
404.8	0.279845	0.0853801	0.0262395
405	0.280091	0.0852037	0.0258548
405.2	0.280197	0.0850547	0.0252051
405.4	0.280252	0.0847078	0.02432
405.6	0.280493	0.0847693	0.0242841
405.8	0.280789	0.0847561	0.0244423
406	0.280731	0.0843707	0.0245111
406.2	0.280992	0.0850628	0.025042
406.4	0.281134	0.0858291	0.0253914
406.6	0.281636	0.0867244	0.0256455
406.8	0.282735	0.0875838	0.026187
407	0.283481	0.088187	0.026533
407.2	0.283585	0.0883412	0.0265762
407.4	0.284279	0.0892063	0.0268098
407.6	0.284717	0.089326	0.0271419
407.8	0.285108	0.0894817	0.0270337
408	0.285935	0.0899534	0.0270108
408.2	0.28604	0.0896182	0.0265665
408.4	0.286676	0.0895203	0.0266445
408.6	0.286889	0.0899257	0.0269408
408.8	0.28679	0.0896168	0.0268838
409	0.286261	0.0899462	0.0265294
409.2	0.285806	0.0891199	0.0261452
409.4	0.285267	0.0882866	0.0258322
409.6	0.285199	0.0882461	0.0259349
409.8	0.285389	0.0881341	0.0263846
410	0.285566	0.0883224	0.0269685
410.2	0.286019	0.0882064	0.0270674
410.4	0.286262	0.0880597	0.0271455
410.6	0.286583	0.0879212	0.0277132
410.8	0.287348	0.0875994	0.0280468
411	0.287267	0.0869066	0.0275972
411.2	0.287188	0.0865252	0.0276276
411.4	0.287905	0.0868777	0.0282158
411.6	0.288495	0.0870803	0.0282103
411.8	0.288192	0.0874939	0.0274076
412	0.288912	0.0880473	0.0274456
412.2	0.289148	0.0885632	0.0275979
412.4	0.289741	0.0896183	0.0280443
412.6	0.289467	0.0897607	0.0281172
412.8	0.289557	0.0899182	0.0278908
413	0.289207	0.0904449	0.0273794
413.2	0.289332	0.0902713	0.0271226
413.4	0.289506	0.0911312	0.0272139
413.6	0.290518	0.0915794	0.0270972
413.8	0.290927	0.0918558	0.0272393
414	0.290676	0.0919399	0.0267829
414.2	0.291143	0.0919242	0.0268174
414.4	0.290664	0.0922057	0.0263899
414.6	0.290977	0.09225	0.0264594
414.8	0.291336	0.0914898	0.0262281
415	0.291168	0.0910258	0.0261712
415.2	0.292031	0.0914162	0.0267391
415.4	0.292764	0.0927777	0.0270041
415.6	0.292854	0.0929413	0.0265854
415.8	0.292829	0.0931218	0.0263257
416	0.29339	0.0929954	0.0266041
416.2	0.293878	0.0932699	0.0271546
416.4	0.29411	0.0928163	0.027343
416.6	0.293833	0.0923497	0.02701
416.8	0.294628	0.0931	0.0269783
417	0.294428	0.0931318	0.0266966
417.2	0.294921	0.0931578	0.0268906
417.4	0.295342	0.0933264	0.0270815
417.6	0.296059	0.0931597	0.0269358
417.8	0.295728	0.0933401	0.0266665
418	0.295733	0.093456	0.0268505
418.2	0.296108	0.0935687	0.0272606
418.4	0.295388	0.0929216	0.0264493
418.6	0.296128	0.0926797	0.027232
418.8	0.296155	0.0920891	0.0275539
419	0.296601	0.092086	0.028033
419.2	0.29672	0.0921618	0.0281724
419.4	0.29649	0.0922276	0.0278948
419.6	0.296568	0.0914368	0.0279029
419.8	0.296769	0.0916644	0.0282922
420	0.297463	0.0919067	0.0289259
420.2	0.297968	0.0921555	0.0294023
420.4	0.298376	0.0923202	0.0291366
420.6	0.298767	0.0929904	0.0298533
420.8	0.299437	0.0936982	0.0301171
421	0.299887	0.0937649	0.0300802
421.2	0.300424	0.0939887	0.0300879
421.4	0.300873	0.0942268	0.0297736
421.6	0.300947	0.0943973	0.0292685
421.8	0.300739	0.0944673	0.0289237
422	0.300826	0.0942336	0.0289109
422.2	0.300691	0.0938274	0.0285941
422.4	0.300746	0.0933685	0.0281306
422.6	0.301236	0.0932895	0.0284455
422.8	0.301552	0.0932737	0.0278844
423	0.301573	0.0931692	0.0274364
423.2	0.301462	0.0931703	0.0271358
423.4	0.301691	0.0934342	0.027157
423.6	0.302068	0.0936547	0.0275346
423.8	0.302757	0.0949408	0.0277566
424	0.303554	0.095274	0.0278653
424.2	0.303485	0.0957282	0.02762
424.4	0.303699	0.0962225	0.0274964
424.6	0.303491	0.0960934	0.0279309
424.8	0.303823	0.0963597	0.0277176
425	0.303947	0.0959099	0.0278512
425.2	0.303836	0.0954555	0.0275529
425.4	0.303575	0.0948451	0.0274053
425.6	0.303395	0.0948152	0.0275543
425.8	0.303033	0.0941968	0.0271092
426	0.303518	0.0939654	0.0274607
426.2	0.304266	0.0941755	0.0277725
426.4	0.304603	0.0939929	0.0276152
426.6	0.305311	0.0943782	0.0279173
426.8	0.305766	0.0946697	0.0276339
427	0.306039	0.0946797	0.0276661
427.2	0.306348	0.0945961	0.0273491
427.4	0.306526	0.0947615	0.0277936
427.6	0.306835	0.0950514	0.0276288
427.8	0.306943	0.0955532	0.0273993
428	0.306525	0.0956186	0.0269396
428.2	0.306553	0.0961228	0.0266216
428.4	0.30678	0.0963861	0.0268886
428.6	0.306767	0.0962457	0.0272308
428.8	0.307364	0.0970541	0.0280098
429	0.307019	0.0967036	0.0284563
429.2	0.30755	0.097276	0.0289334
429.4	0.307457	0.0972787	0.0291567
429.6	0.308262	0.0980423	0.0295796
429.8	0.309165	0.0986062	0.0301113
430	0.310132	0.099486	0.031168
430.2	0.311024	0.0999237	0.0314787
430.4	0.311521	0.100001	0.0319589
430.6	0.312438	0.100895	0.0326043
430.8	0.312339	0.100585	0.0320462
431	0.312746	0.10078	0.0322107
431.2	0.312859	0.100246	0.0318727
431.4	0.312521	0.099539	0.0318292
431.6	0.312578	0.0993946	0.0308293
431.8	0.312718	0.0995949	0.0302192
432	0.31268	0.0993473	0.0292266
432.2	0.313145	0.0995845	0.0289466
432.4	0.31306	0.099668	0.0289561
432.6	0.31291	0.0996493	0.0284476
432.8	0.31312	0.0998298	0.0284105
433	0.313138	0.0995649	0.0282332
433.2	0.313753	0.0999901	0.0283104
433.4	0.313912	0.0996787	0.0279366
433.6	0.314853	0.100141	0.028837
433.8	0.315309	0.100596	0.0297515
434	0.315166	0.100557	0.029704
434.2	0.315352	0.100408	0.0300307
434.4	0.315462	0.100409	0.0306196
434.6	0.315539	0.10103	0.0310497
434.8	0.315597	0.100512	0.0313665
435	0.315639	0.100172	0.0318761
435.2	0.315534	0.099672	0.0317281
435.4	0.315684	0.0995538	0.0318199
435.6	0.316077	0.0999482	0.0313651
435.8	0.316369	0.0999801	0.0314096
436	0.315792	0.100092	0.0310746
436.2	0.315867	0.100248	0.031269
436.4	0.316054	0.100172	0.0310216
436.6	0.316119	0.100276	0.0310474
436.8	0.316859	0.100666	0.0311786
437	0.316595	0.100069	0.0309069
437.2	0.316531	0.099902	0.0306957
437.4	0.316765	0.100128	0.0309417
437.6	0.317324	0.100791	0.0310585
437.8	0.317499	0.101242	0.0309067
438	0.317345	0.101174	0.0306162
438.2	0.317693	0.101519	0.0310983
438.4	0.318083	0.101857	0.0308882
438.6	0.318481	0.102407	0.0309524
438.8	0.319112	0.102323	0.03079
439	0.319059	0.102691	0.0305303
439.2	0.319852	0.103454	0.0306231
439.4	0.320121	0.103595	0.0306913
439.6	0.320217	0.103733	0.0306856
439.8	0.320557	0.103938	0.0311025
440	0.320311	0.104091	0.0311443
440.2	0.320855	0.103849	0.0312453
440.4	0.321043	0.103783	0.0312232
440.6	0.320784	0.103905	0.0317148
440.8	0.320637	0.103577	0.0318647
441	0.319584	0.102673	0.0311409
441.2	0.31952	0.102793	0.0311467
441.4	0.319796	0.103496	0.031866
441.6	0.320276	0.103949	0.0320043
441.8	0.320338	0.104152	0.0327019
442	0.320569	0.104329	0.0331368
442.2	0.321239	0.104687	0.033797
442.4	0.32158	0.104949	0.0335139
442.6	0.321879	0.105101	0.0335888
442.8	0.322084	0.105325	0.0338376
443	0.322334	0.105524	0.033986
443.2	0.322885	0.105673	0.0340501
443.4	0.323142	0.105299	0.0340042
443.6	0.32379	0.105461	0.0339072
443.8	0.323877	0.105169	0.0331662
444	0.32385	0.104911	0.0324837
444.2	0.32392	0.104528	0.0320457
444.4	0.324194	0.104612	0.0315037
444.6	0.324249	0.104691	0.0309486
444.8	0.324501	0.104559	0.0303302
445	0.324299	0.104153	0.0296032
445.2	0.324736	0.104101	0.0295581
445.4	0.324958	0.104234	0.0298755
445.6	0.32535	0.104433	0.0298197
445.8	0.325457	0.104681	0.0302999
446	0.325493	0.1045	0.0302177
446.2	0.326189	0.104689	0.0309246
446.4	0.326013	0.104325	0.0305084
446.6	0.326082	0.104238	0.0308568
446.8	0.325981	0.104432	0.0313936
447	0.326461	0.104664	0.0315219
447.2	0.327047	0.105258	0.0320895
447.4	0.327018	0.10498	0.0319197
447.6	0.327102	0.10524	0.0313825
447.8	0.327041	0.105231	0.0309675
448	0.327229	0.105776	0.0308
448.2	0.327635	0.106332	0.0311113
448.4	0.328221	0.107131	0.0307695
448.6	0.328312	0.107058	0.0303021
448.8	0.328155	0.106752	0.0302564
449	0.32791	0.106317	0.0302304
449.2	0.328305	0.106762	0.030121
449.4	0.327928	0.107028	0.0301489
449.6	0.327664	0.107077	0.0302353
449.8	0.327585	0.107154	0.030503
450	0.328079	0.106892	0.0309425
450.2	0.328401	0.107078	0.0319968
450.4	0.327952	0.106771	0.032224
450.6	0.328431	0.10765	0.0329146
450.8	0.328765	0.108198	0.0335657
451	0.329264	0.108246	0.0338685
451.2	0.329175	0.108173	0.0341615
451.4	0.328884	0.107943	0.0335285
451.6	0.329526	0.108067	0.0334723
451.8	0.329272	0.107916	0.0335352
452	0.32971	0.108185	0.0337308
452.2	0.329966	0.108167	0.0337643
452.4	0.330315	0.107817	0.0335897
452.6	0.330661	0.107509	0.0336441
452.8	0.330739	0.107321	0.0335238
453	0.331447	0.107517	0.0336641
453.2	0.331381	0.107738	0.0333123
453.4	0.331743	0.107966	0.0333051
453.6	0.331794	0.107726	0.0330948
453.8	0.332157	0.107763	0.0328513
454	0.33263	0.108194	0.0333324
454.2	0.332606	0.108519	0.0332872
454.4	0.333052	0.108983	0.0334774
454.6	0.333549	0.109711	0.0332021
454.8	0.333765	0.110152	0.0333641
455	0.333764	0.11012	0.0327024
455.2	0.333622	0.110039	0.0324752
455.4	0.334098	0.110454	0.0321396
455.6	0.333725	0.10971	0.032203
455.8	0.333419	0.109737	0.0324915
456	0.334434	0.109977	0.0326904
456.2	0.334596	0.109682	0.0330863
456.4	0.335238	0.10984	0.0343318
456.6	0.335267	0.109952	0.034466
456.8	0.334941	0.109483	0.0340669
457	0.335112	0.109288	0.0344376
457.2	0.334978	0.109493	0.0344295
457.4	0.33523	0.109443	0.0344361
457.6	0.334643	0.109072	0.0337944
457.8	0.334782	0.10894	0.0336632
458	0.335096	0.109325	0.0336221
458.2	0.335655	0.109647	0.0338275
458.4	0.335915	0.10998	0.0337895
458.6	0.336245	0.110523	0.0334053
458.8	0.336369	0.110986	0.0337554
459	0.336346	0.110758	0.0331362
459.2	0.336194	0.110548	0.0330871
459.4	0.336601	0.11103	0.0337026
459.6	0.336455	0.110796	0.0338658
459.8	0.337058	0.111574	0.0345632
460	0.337713	0.111626	0.0347685
460.2	0.337682	0.111761	0.0354644
460.4	0.337832	0.112192	0.0358554
460.6	0.337431	0.112019	0.035417
460.8	0.337305	0.111471	0.0354405
461	0.337455	0.111365	0.0352349
461.2	0.337546	0.111604	0.0351979
461.4	0.337386	0.1114	0.0346844
461.6	0.337942	0.111784	0.0342184
461.8	0.338832	0.112233	0.0341433
462	0.338699	0.112416	0.0336392
462.2	0.339116	0.112519	0.0334737
462.4	0.339253	0.112572	0.0329918
462.6	0.339471	0.112972	0.0332578
462.8	0.339502	0.113094	0.0332335
463	0.339352	0.113172	0.0331414
463.2	0.339636	0.113275	0.0333565
463.4	0.339746	0.113388	0.0336893
463.6	0.339595	0.113253	0.0333613
463.8	0.339139	0.113311	0.0332779
464	0.339032	0.113151	0.0330792
464.2	0.33889	0.113369	0.0330445
464.4	0.338965	0.113273	0.0328469
464.6	0.338969	0.113518	0.032978
464.8	0.339264	0.113531	0.0334795
465	0.3395	0.113295	0.0332199
465.2	0.339451	0.11338	0.0334693
465.4	0.339686	0.113303	0.0336021
465.6	0.340104	0.113194	0.0338099
465.8	0.340926	0.11316	0.033976
466	0.341115	0.112778	0.0339316
466.2	0.341812	0.112823	0.0342458
466.4	0.342057	0.1129	0.0340428
466.6	0.342582	0.112864	0.0344528
466.8	0.343182	0.112767	0.0341738
467	0.343064	0.11245	0.0338984
467.2	0.343193	0.112105	0.0336601
467.4	0.342859	0.111816	0.0329566
467.6	0.343117	0.112175	0.0329509
467.8	0.342399	0.111898	0.0324419
468	0.342701	0.111954	0.0320836
468.2	0.342929	0.111944	0.0314798
468.4	0.342853	0.112089	0.031665
468.6	0.342959	0.112923	0.0321949
468.8	0.342907	0.112453	0.0325175
469	0.342788	0.112162	0.0325617
469.2	0.342292	0.11212	0.0325428
469.4	0.3427	0.112312	0.0327438
469.6	0.342808	0.112482	0.0331064
469.8	0.343613	0.113087	0.0337251
470	0.343665	0.113232	0.0343819
470.2	0.343846	0.113597	0.03476
470.4	0.344078	0.114059	0.035294
470.6	0.344814	0.114321	0.0360574
470.8	0.344982	0.114107	0.0355872
471	0.34507	0.113871	0.0353475
471.2	0.344972	0.114309	0.0356017
471.4	0.345597	0.114471	0.0354316
471.6	0.345824	0.114682	0.0357746
471.8	0.345518	0.114366	0.0355097
472	0.346191	0.114544	0.0352528
472.2	0.345955	0.11405	0.0353088
472.4	0.345787	0.114136	0.0353614
472.6	0.345501	0.114358	0.0349905
472.8	0.345541	0.114326	0.0347015
473	0.345928	0.114623	0.0345826
473.2	0.345727	0.114276	0.0339049
473.4	0.345826	0.1143	0.0337615
473.6	0.345705	0.114005	0.0338267
473.8	0.345648	0.114047	0.0340447
474	0.34582	0.113982	0.0339738
474.2	0.345961	0.114366	0.0344613
474.4	0.345719	0.114612	0.0346966
474.6	0.345781	0.114278	0.0343791
474.8	0.346035	0.114544	0.0343773
475	0.345914	0.114609	0.0341768
475.2	0.346186	0.115173	0.0348636
475.4	0.346473	0.115473	0.0352819
475.6	0.346892	0.116058	0.0361115
475.8	0.347677	0.116602	0.0363562
476	0.347997	0.116596	0.0366259
476.2	0.347778	0.116642	0.0368358
476.4	0.348301	0.117167	0.0365531
476.6	0.348555	0.117979	0.0366655
476.8	0.349029	0.11799	0.0365339
477	0.349318	0.117504	0.0363162
477.2	0.349006	0.116988	0.0359649
477.4	0.349043	0.116576	0.0351226
477.6	0.349069	0.11618	0.0350243
477.8	0.349256	0.116032	0.0349595
478	0.349332	0.115722	0.0347347
478.2	0.348782	0.115421	0.0346891
478.4	0.349121	0.11555	0.0343786
478.6	0.349589	0.115671	0.0344928
478.8	0.349921	0.116132	0.0346216
479	0.349912	0.115814	0.0343869
479.2	0.350007	0.115907	0.0345759
479.4	0.350129	0.116412	0.0347471
479.6	0.35066	0.1167	0.0347311
479.8	0.350937	0.117105	0.0353575
480	0.350936	0.117372	0.0356861
480.2	0.351058	0.117917	0.0361876
480.4	0.35134	0.117934	0.0361481
480.6	0.351567	0.11851	0.0365976
480.8	0.351404	0.117893	0.0361669
481	0.351548	0.11813	0.0359077
481.2	0.351836	0.118372	0.0364197
481.4	0.3524	0.118064	0.0361155
481.6	0.352821	0.118014	0.0368736
481.8	0.353168	0.118152	0.0369146
482	0.352983	0.11812	0.0367608
482.2	0.352975	0.118168	0.0361921
482.4	0.353467	0.118464	0.036146
482.6	0.353383	0.118308	0.0359042
482.8	0.352995	0.117986	0.0358632
483	0.352495	0.117429	0.0353018
483.2	0.351927	0.117035	0.0345392
483.4	0.35221	0.117265	0.0345336
483.6	0.351499	0.116933	0.0341629
483.8	0.351322	0.11706	0.0344916
484	0.35133	0.116972	0.0339406
484.2	0.351237	0.116849	0.0338873
484.4	0.351264	0.11673	0.0332755
484.6	0.351872	0.11715	0.033747
484.8	0.352117	0.117207	0.0337866
485	0.352625	0.118216	0.0345257
485.2	0.353876	0.119109	0.0360291
485.4	0.354232	0.118828	0.0360192
485.6	0.354705	0.119633	0.0369639
485.8	0.355173	0.120443	0.0372336
486	0.355282	0.120664	0.0369524
486.2	0.355523	0.120779	0.036542
486.4	0.355453	0.120837	0.0366479
486.6	0.355694	0.120801	0.0367172
486.8	0.355627	0.12049	0.0366526
487	0.355611	0.12012	0.0358296
487.2	0.355645	0.119724	0.0352677
487.4	0.35575	0.119901	0.0353851
487.6	0.355181	0.119531	0.0351766
487.8	0.355207	0.119224	0.0351021
488	0.355136	0.119269	0.0349385
488.2	0.354953	0.119244	0.0349428
488.4	0.355105	0.119218	0.0350873
488.6	0.355483	0.119547	0.0359422
488.8	0.355543	0.120015	0.0363388
489	0.35611	0.120161	0.0371212
489.2	0.356895	0.120577	0.0380532
489.4	0.356697	0.120332	0.0378119
489.6	0.357569	0.121184	0.0382685
489.8	0.358277	0.121285	0.038077
490	0.358043	0.120936	0.0371497
490.2	0.358065	0.120649	0.0370096
490.4	0.357966	0.120877	0.0368742
490.6	0.358211	0.120772	0.0365335
490.8	0.357866	0.120289	0.0364435
491	0.357668	0.119947	0.0364585
491.2	0.357696	0.119896	0.0366674
491.4	0.357585	0.120188	0.0368808
491.6	0.35705	0.119115	0.0364577
491.8	0.357337	0.119537	0.0369715
492	0.356844	0.119852	0.0369774
492.2	0.357005	0.119972	0.0369695
492.4	0.357727	0.119972	0.0372729
492.6	0.358218	0.120253	0.0377663
492.8	0.35846	0.120301	0.0378421
493	0.359152	0.120086	0.0383306
493.2	0.35912	0.12022	0.0378378
493.4	0.3593	0.120004	0.037127
493.6	0.359615	0.119593	0.0369246
493.8	0.359077	0.119329	0.0362504
494	0.358914	0.119267	0.0360325
494.2	0.35929	0.11943	0.0365201
494.4	0.358983	0.119647	0.0361699
494.6	0.358793	0.119714	0.0357719
494.8	0.35836	0.119384	0.0361575
495	0.358378	0.119114	0.0358138
495.2	0.358198	0.119049	0.0353181
495.4	0.358096	0.118695	0.0351212
495.6	0.359059	0.119121	0.035791
495.8	0.359899	0.12069	0.0368451
496	0.360103	0.120658	0.0369006
496.2	0.360889	0.121234	0.0372626
496.4	0.36109	0.120863	0.037444
496.6	0.361004	0.120899	0.0373743
496.8	0.360889	0.120744	0.0373124
497	0.361208	0.120534	0.0373545
497.2	0.360905	0.120331	0.0367289
497.4	0.361201	0.120748	0.0369529
497.6	0.361164	0.120933	0.0371993
497.8	0.360928	0.121399	0.0373888
498	0.361595	0.121777	0.0383801
498.2	0.361444	0.122281	0.0382221
498.4	0.360541	0.122142	0.037973
498.6	0.360609	0.12252	0.0380791
498.8	0.36065	0.12169	0.0379771
499	0.360769	0.121743	0.0375352
499.2	0.360684	0.12177	0.0372477
499.4	0.361479	0.122241	0.0377568
499.6	0.361475	0.122408	0.0376494
499.8	0.360751	0.122193	0.037354
500	0.360526	0.121837	0.0370797
500.2	0.359956	0.12177	0.0369182
500.4	0.359873	0.121238	0.0365697
500.6	0.360382	0.12136	0.0364992
500.8	0.360445	0.120927	0.036597
501	0.360091	0.120517	0.0363488
501.2	0.359828	0.120512	0.036016
501.4	0.360209	0.120999	0.036457
501.6	0.360263	0.120869	0.0361933
501.8	0.359783	0.120502	0.0361628
502	0.359698	0.120667	0.0358434
502.2	0.360065	0.121448	0.0359004
502.4	0.360313	0.121753	0.0365629
502.6	0.360953	0.122064	0.0367332
502.8	0.361488	0.121918	0.0368791
503	0.361994	0.122675	0.0374247
503.2	0.362238	0.122826	0.0374991
503.4	0.362514	0.122905	0.03765
503.6	0.361859	0.122519	0.0373902
503.8	0.362932	0.123505	0.0385063
504	0.363242	0.123974	0.0390935
504.2	0.363394	0.12383	0.0392821
504.4	0.364085	0.124311	0.039567
504.6	0.364098	0.124187	0.0395538
504.8	0.3642	0.124376	0.0395337
505	0.364004	0.123945	0.0390565
505.2	0.364273	0.124083	0.0389516
505.4	0.364102	0.12384	0.0384601
505.6	0.363731	0.123674	0.0373253
505.8	0.363247	0.124316	0.0368536
506	0.363245	0.124757	0.0360774
506.2	0.364033	0.125252	0.0363333
506.4	0.363906	0.124952	0.0361819
506.6	0.364372	0.124842	0.0364398
506.8	0.365072	0.124606	0.0367806
507	0.365778	0.124785	0.0368354
507.2	0.366194	0.124894	0.0366435
507.4	0.366376	0.124501	0.0368026
507.6	0.367166	0.125056	0.037588
507.8	0.368054	0.125231	0.0383086
508	0.367827	0.124764	0.0383528
508.2	0.367961	0.124413	0.038362
508.4	0.368139	0.124571	0.03867
508.6	0.368182	0.124283	0.0387262
508.8	0.36838	0.124257	0.0387957
509	0.367829	0.123607	0.038605
509.2	0.367399	0.123792	0.0386166
509.4	0.366766	0.123737	0.0381325
509.6	0.36641	0.124167	0.0378996
509.8	0.365926	0.124555	0.0376795
510	0.365926	0.124555	0.0376795
510.2	0.364769	0.124688	0.0376193
510.4	0.36415	0.124502	0.0376793
510.6	0.363015	0.123643	0.0374131
510.8	0.36232	0.12357	0.0372637
511	0.361237	0.123272	0.0370082
511.2	0.360442	0.123184	0.0371418
511.4	0.359612	0.123104	0.0369888
511.6	0.358406	0.12269	0.0364428
511.8	0.358136	0.122158	0.0364116
512	0.357607	0.121466	0.036404
512.2	0.356984	0.120754	0.036048
512.4	0.356288	0.120234	0.0355246
512.6	0.354987	0.120119	0.0343566
512.8	0.353735	0.119959	0.0335313
513	0.352976	0.120156	0.0331535
513.2	0.352318	0.120738	0.0332507
513.4	0.351734	0.120298	0.0332894
513.6	0.35164	0.119771	0.033993
513.8	0.351293	0.120417	0.0343694
514	0.350737	0.120453	0.0344546
514.2	0.349672	0.120251	0.0343309
514.4	0.349456	0.120174	0.0344232
514.6	0.348915	0.120063	0.034378
514.8	0.349097	0.121152	0.035144
515	0.34856	0.120753	0.0354974
515.2	0.348126	0.120539	0.035646
515.4	0.347578	0.120398	0.0355328
515.6	0.346843	0.119532	0.035346
515.8	0.347081	0.119451	0.0357791
516	0.346412	0.118748	0.0358843
516.2	0.345989	0.118685	0.035999
516.4	0.345179	0.118118	0.0356515
516.6	0.344107	0.117875	0.0353694
516.8	0.342993	0.11728	0.0348474
517	0.341938	0.116694	0.0348295
517.2	0.341361	0.116613	0.0350337
517.4	0.340928	0.11601	0.0347304
517.6	0.340534	0.115964	0.0350015
517.8	0.339814	0.116298	0.034536
518	0.338895	0.115668	0.0341357
518.2	0.338452	0.115848	0.0336393
518.4	0.337984	0.116239	0.0338482
518.6	0.337768	0.116208	0.0341336
518.8	0.337312	0.116095	0.0342486
519	0.336816	0.115648	0.0338237
519.2	0.336099	0.115442	0.033232
519.4	0.33596	0.11573	0.033677
519.6	0.335741	0.115787	0.0335862
519.8	0.335754	0.115635	0.0337568
520	0.33564	0.11547	0.0340607
520.2	0.335779	0.115632	0.03417
520.4	0.335154	0.115142	0.033515
520.6	0.334267	0.114897	0.0333016
520.8	0.33359	0.115225	0.0330553
521	0.333007	0.115139	0.0337556
521.2	0.332754	0.115766	0.0339742
521.4	0.332066	0.115641	0.0338539
521.6	0.331483	0.115246	0.0341184
521.8	0.330743	0.114956	0.0338165
522	0.329624	0.114792	0.0331204
522.2	0.328879	0.114241	0.0327029
522.4	0.327919	0.114079	0.0333689
522.6	0.327556	0.113635	0.0331032
522.8	0.327557	0.113643	0.0329516
523	0.327476	0.113509	0.0332916
523.2	0.327279	0.113177	0.033081
523.4	0.32708	0.113517	0.0335286
523.6	0.326686	0.113625	0.0333941
523.8	0.325982	0.113066	0.03355
524	0.32575	0.113061	0.0335748
524.2	0.325991	0.112826	0.0337317
524.4	0.325806	0.113265	0.0340425
524.6	0.325067	0.113282	0.0344716
524.8	0.3244	0.113027	0.0341965
525	0.323491	0.11274	0.0343838
525.2	0.32277	0.112667	0.034262
525.4	0.322028	0.112345	0.0343963
525.6	0.321527	0.111886	0.0339654
525.8	0.320594	0.111328	0.0326607
526	0.319588	0.11094	0.0318539
526.2	0.319053	0.110235	0.0315714
526.4	0.318635	0.110298	0.0317069
526.6	0.318533	0.109915	0.0314815
526.8	0.318254	0.109363	0.0312721
527	0.317501	0.109149	0.0309649
527.2	0.317018	0.109441	0.0305918
527.4	0.316084	0.109798	0.0305978
527.6	0.315298	0.10925	0.0306118
527.8	0.314379	0.108536	0.0303473
528	0.31392	0.10843	0.0300167
528.2	0.313851	0.108555	0.0299757
528.4	0.313029	0.108531	0.0297699
528.6	0.312553	0.108414	0.029978
528.8	0.312023	0.107727	0.0297425
529	0.311583	0.107847	0.0301854
529.2	0.3118	0.107935	0.03071
529.4	0.312147	0.108128	0.0313151
529.6	0.312507	0.107995	0.0311484
529.8	0.312449	0.107361	0.0311713
530	0.312201	0.107069	0.0313831
530.2	0.31197	0.10677	0.0313332
530.4	0.311605	0.106224	0.0313821
530.6	0.311144	0.105783	0.0314776
530.8	0.310258	0.105129	0.0308352
531	0.309481	0.105222	0.0304551
531.2	0.308741	0.105117	0.0305461
531.4	0.308067	0.10526	0.0306985
531.6	0.307559	0.104921	0.030873
531.8	0.306533	0.105075	0.0304531
532	0.305726	0.105185	0.0302491
532.2	0.305159	0.105167	0.0299963
532.4	0.30475	0.105372	0.0306404
532.6	0.3047	0.105932	0.0312511
532.8	0.304443	0.106348	0.031469
533	0.303974	0.106394	0.0315943
533.2	0.304412	0.106554	0.0319104
533.4	0.304001	0.106359	0.0319837
533.6	0.304248	0.106295	0.0321804
533.8	0.304304	0.105833	0.0322496
534	0.30376	0.105674	0.0320776
534.2	0.303004	0.104972	0.0311826
534.4	0.302726	0.104608	0.0308632
534.6	0.302572	0.104103	0.0306677
534.8	0.301551	0.103468	0.0299265
535	0.301367	0.103233	0.0299071
535.2	0.301017	0.103404	0.0302848
535.4	0.301181	0.103467	0.0302655
535.6	0.30024	0.103166	0.0298823
535.8	0.299318	0.102732	0.0296532
536	0.298717	0.102901	0.0295684
536.2	0.298413	0.103527	0.0296727
536.4	0.297806	0.102984	0.0295616
536.6	0.297405	0.103046	0.0293663
536.8	0.29672	0.102883	0.0290214
537	0.29523	0.101357	0.0284115
537.2	0.294876	0.101429	0.0284473
537.4	0.294394	0.101414	0.0287496
537.6	0.294393	0.101403	0.0291902
537.8	0.293936	0.100968	0.0292532
538	0.292906	0.100484	0.0291702
538.2	0.292628	0.100311	0.028613
538.4	0.292792	0.100296	0.0290181
538.6	0.292664	0.100029	0.028944
538.8	0.292178	0.099976	0.0289643
539	0.292516	0.0999334	0.0291754
539.2	0.292435	0.100621	0.0296119
539.4	0.292316	0.100162	0.0290851
539.6	0.291752	0.100206	0.0290056
539.8	0.291687	0.10043	0.0293639
540	0.291329	0.100728	0.0290686
540.2	0.291231	0.100602	0.0289952
540.4	0.290285	0.0993149	0.0281383
540.6	0.289951	0.0994035	0.0282119
540.8	0.288898	0.0989393	0.0278748
541	0.288099	0.0984138	0.0278125
541.2	0.287631	0.098406	0.027521
541.4	0.287154	0.0982575	0.0278313
541.6	0.286255	0.097637	0.0276531
541.8	0.285644	0.0973445	0.0278168
542	0.284872	0.0969597	0.027829
542.2	0.284596	0.0966706	0.0276743
542.4	0.28455	0.0971109	0.0282073
542.6	0.283989	0.0968134	0.0280598
542.8	0.283669	0.0967995	0.0276938
543	0.284005	0.0970883	0.0280432
543.2	0.283514	0.0970627	0.0282874
543.4	0.282796	0.0961283	0.0278029
543.6	0.282617	0.0964175	0.0282093
543.8	0.282258	0.0964289	0.0286523
544	0.281994	0.0964046	0.0286526
544.2	0.281855	0.0964736	0.0283506
544.4	0.281748	0.0961943	0.0281757
544.6	0.281251	0.0961424	0.028007
544.8	0.280939	0.0959525	0.0280839
545	0.280448	0.0952821	0.0278279
545.2	0.279811	0.0951176	0.0280472
545.4	0.280023	0.0952433	0.0288403
545.6	0.279667	0.094881	0.0285786
545.8	0.279264	0.095174	0.028613
546	0.279088	0.0949671	0.0286336
546.2	0.278746	0.0951721	0.0283916
546.4	0.278558	0.095737	0.0284849
546.6	0.277473	0.0949086	0.0279187
546.8	0.277411	0.0955681	0.0282135
547	0.277183	0.0953743	0.0286781
547.2	0.276519	0.0950502	0.0289608
547.4	0.275952	0.0946477	0.0289541
547.6	0.27582	0.094593	0.0287954
547.8	0.275171	0.0939857	0.0284535
548	0.275182	0.0938153	0.0279668
548.2	0.274821	0.093315	0.0276074
548.4	0.274781	0.0930294	0.0278323
548.6	0.27398	0.0928327	0.0280016
548.8	0.273805	0.0927223	0.0284669
549	0.273302	0.0926343	0.0288821
549.2	0.273263	0.0933394	0.0294577
549.4	0.273122	0.0935674	0.0294646
549.6	0.272282	0.0936553	0.0286464
549.8	0.27219	0.0937737	0.0281582
550	0.272334	0.0939501	0.0281411
550.2	0.272174	0.0942931	0.0282295
550.4	0.27143	0.0939525	0.0280932
550.6	0.270642	0.0932317	0.0277221
550.8	0.270773	0.0936957	0.0285342
551	0.270509	0.0935044	0.0281683
551.2	0.270143	0.0933484	0.0280114
551.4	0.269031	0.0924676	0.0272269
551.6	0.268137	0.0918288	0.0268754
551.8	0.267563	0.0914586	0.0268838
552	0.267249	0.0910167	0.0264487
552.2	0.266314	0.0906592	0.0271048
552.4	0.265785	0.0905081	0.0275752
552.6	0.264967	0.0903112	0.0278089
552.8	0.264376	0.089922	0.0278493
553	0.263575	0.0896488	0.0277591
553.2	0.26284	0.0894851	0.0274576
553.4	0.262441	0.0894958	0.0272772
553.6	0.262228	0.0892287	0.0268932
553.8	0.262497	0.0891683	0.0269659
554	0.26243	0.0893603	0.0271999
554.2	0.2625	0.0890719	0.027431
554.4	0.261726	0.0884436	0.026904
554.6	0.261894	0.0881062	0.0269814
554.8	0.262159	0.0885609	0.0276382
555	0.262157	0.0886728	0.0271206
555.2	0.262041	0.0882152	0.0272981
555.4	0.26143	0.0876463	0.0273248
555.6	0.2616	0.0878693	0.0276927
555.8	0.261942	0.0882874	0.0277886
556	0.261676	0.0878507	0.0276822
556.2	0.261357	0.0882117	0.0283408
556.4	0.260927	0.088298	0.0279761
556.6	0.260801	0.0881928	0.0275488
556.8	0.259759	0.0877414	0.0271602
557	0.258631	0.087061	0.0263948
557.2	0.257882	0.086919	0.025721
557.4	0.257398	0.0865752	0.0254262
557.6	0.256676	0.0863203	0.025195
557.8	0.256367	0.0868379	0.025106
558	0.255813	0.0871013	0.0247827
558.2	0.255448	0.0870784	0.0251289
558.4	0.254828	0.0874811	0.0249061
558.6	0.254654	0.0875091	0.0250429
558.8	0.25428	0.0872448	0.0255853
559	0.253655	0.0865818	0.025626
559.2	0.25346	0.086556	0.0262055
559.4	0.253205	0.08641	0.0264538
559.6	0.253675	0.0870641	0.0269844
559.8	0.253934	0.0869145	0.0270645
560	0.253911	0.0870331	0.0274878
560.2	0.253942	0.0875445	0.0277708
560.4	0.253926	0.0876347	0.0275426
560.6	0.253728	0.087096	0.0276154
560.8	0.252953	0.0862002	0.0269653
561	0.252678	0.085378	0.0263947
561.2	0.252527	0.0848937	0.0258753
561.4	0.252223	0.0845361	0.0263551
561.6	0.252143	0.084842	0.026728
561.8	0.251789	0.0849291	0.0268998
562	0.25089	0.0844125	0.0263415
562.2	0.250317	0.0843937	0.0265471
562.4	0.250099	0.0846228	0.0263776
562.6	0.249093	0.0839837	0.026179
562.8	0.248091	0.083119	0.0260795
563	0.247556	0.0831555	0.0258372
563.2	0.247555	0.0833861	0.0254259
563.4	0.247437	0.0832066	0.0252433
563.6	0.247538	0.0835913	0.0252326
563.8	0.247305	0.0830296	0.0250797
564	0.247243	0.0832828	0.0257957
564.2	0.247046	0.0834989	0.0257859
564.4	0.247248	0.0839996	0.0260484
564.6	0.246848	0.0837271	0.0261834
564.8	0.247043	0.0837094	0.0258844
565	0.246904	0.0836876	0.0261758
565.2	0.246858	0.0841562	0.0267936
565.4	0.246285	0.0839944	0.0270894
565.6	0.246036	0.0841249	0.0267819
565.8	0.245455	0.0839494	0.0264439
566	0.245023	0.0837556	0.0259196
566.2	0.245263	0.0843123	0.0259643
566.4	0.245232	0.084516	0.0258065
566.6	0.244922	0.0842287	0.0253894
566.8	0.24404	0.0837556	0.0250155
567	0.243911	0.083668	0.0248432
567.2	0.242985	0.0829022	0.0237209
567.4	0.242512	0.0825765	0.0237941
567.6	0.241936	0.0825666	0.0241207
567.8	0.240714	0.081528	0.0242905
568	0.240774	0.0817937	0.0247513
568.2	0.240607	0.0821101	0.0246473
568.4	0.240597	0.0822624	0.0251151
568.6	0.239751	0.0818844	0.0248024
568.8	0.239987	0.0819943	0.0252318
569	0.239564	0.0819745	0.0256534
569.2	0.238977	0.0817956	0.0252634
569.4	0.238881	0.081109	0.0249514
569.6	0.239117	0.0816486	0.0249439
569.8	0.239093	0.0820553	0.0249805
570	0.239252	0.0818851	0.0246328
570.2	0.238944	0.0816359	0.0241144
570.4	0.238812	0.0814178	0.0241013
570.6	0.238487	0.0809436	0.0238449
570.8	0.237478	0.0802938	0.0238261
571	0.237168	0.0798441	0.0237492
571.2	0.236719	0.0793162	0.0237342
571.4	0.23611	0.0794887	0.0240115
571.6	0.23584	0.0798371	0.0244455
571.8	0.235049	0.0795274	0.0244096
572	0.235238	0.0797902	0.0243514
572.2	0.234981	0.0798687	0.0245307
572.4	0.234033	0.0794304	0.0245944
572.6	0.233365	0.0793908	0.0243823
572.8	0.2333	0.0797269	0.024866
573	0.232384	0.0790914	0.0243732
573.2	0.23164	0.0784799	0.0236593
573.4	0.231429	0.0784487	0.0239999
573.6	0.231472	0.0785966	0.0238079
573.8	0.230974	0.0787844	0.0234383
574	0.230587	0.0783471	0.0234742
574.2	0.230311	0.0783542	0.0234522
574.4	0.231067	0.0787659	0.0238349
574.6	0.230924	0.0786274	0.024233
574.8	0.231176	0.0786821	0.0248223
575	0.230868	0.0783098	0.0246289
575.2	0.231131	0.0782484	0.0247593
575.4	0.23069	0.0783405	0.0242865
575.6	0.231368	0.0786901	0.0248736
575.8	0.231145	0.0782478	0.025135
576	0.230974	0.0778236	0.0249397
576.2	0.23061	0.0774996	0.0244327
576.4	0.229838	0.0772257	0.0238617
576.6	0.229961	0.0774617	0.0238191
576.8	0.22942	0.0775106	0.0234779
577	0.228908	0.0765985	0.0227972
577.2	0.228689	0.0764011	0.022497
577.4	0.227962	0.0756678	0.0222612
577.6	0.227814	0.0753042	0.0218647
577.8	0.22675	0.0755692	0.0215429
578	0.226285	0.0761769	0.0217606
578.2	0.225641	0.0765112	0.0210437
578.4	0.225463	0.0769681	0.0212885
578.6	0.224893	0.0770781	0.0215821
578.8	0.224185	0.0771046	0.0214952
579	0.223322	0.0765083	0.0211566
579.2	0.223217	0.0766863	0.0215419
579.4	0.22236	0.0760877	0.021438
579.6	0.222526	0.0758538	0.0218726
579.8	0.222143	0.0758667	0.022137
580	0.221815	0.0758879	0.0220039
580.2	0.221588	0.0760136	0.0216068
580.4	0.221304	0.0758143	0.0218155
580.6	0.221417	0.0755094	0.0218235
580.8	0.220862	0.0753033	0.0213789
581	0.221028	0.0749711	0.0214766
581.2	0.220168	0.0742624	0.0212074
581.4	0.219565	0.0736538	0.0216166
581.6	0.219662	0.0740197	0.0219752
581.8	0.219574	0.0743101	0.0222428
582	0.219402	0.0747754	0.0227004
582.2	0.219009	0.0745086	0.0225111
582.4	0.219069	0.0749315	0.0231229
582.6	0.218704	0.0743666	0.0229505
582.8	0.218386	0.0743614	0.0228769
583	0.218125	0.0740937	0.0226898
583.2	0.217967	0.0741437	0.022486
583.4	0.21697	0.0738573	0.0218236
583.6	0.217133	0.0738155	0.0219761
583.8	0.216621	0.0739563	0.0219016
584	0.216716	0.0737154	0.0223002
584.2	0.216275	0.0732805	0.0216217
584.4	0.215936	0.0726708	0.0215451
584.6	0.215964	0.0723402	0.0212269
584.8	0.21563	0.0721295	0.0212001
585	0.215836	0.0723945	0.0218082
585.2	0.215523	0.0718775	0.0219597
585.4	0.216094	0.0715928	0.022901
585.6	0.215919	0.0711284	0.0224702
585.8	0.215834	0.0703267	0.0228007
586	0.21527	0.0700467	0.0227607
586.2	0.214817	0.0698565	0.0221985
586.4	0.214923	0.0703023	0.022253
586.6	0.214739	0.0699637	0.0219173
586.8	0.214574	0.0705792	0.0219862
587	0.214034	0.0708202	0.0219412
587.2	0.213472	0.070968	0.0213916
587.4	0.212075	0.0705044	0.0210283
587.6	0.211877	0.0703299	0.0213558
587.8	0.21139	0.0702992	0.0217215
588	0.211368	0.0707748	0.0225148
588.2	0.210829	0.0705399	0.0223556
588.4	0.21045	0.0708247	0.0224152
588.6	0.210446	0.0705097	0.0226445
588.8	0.210429	0.0707574	0.0229686
589	0.210542	0.0710328	0.0233677
589.2	0.209897	0.0704342	0.022861
589.4	0.21018	0.0703438	0.0233276
589.6	0.210128	0.0707182	0.0234708
589.8	0.210356	0.0705263	0.0238799
590	0.210165	0.0705915	0.0233747
590.2	0.210677	0.0712132	0.0236419
590.4	0.211193	0.0712968	0.0236361
590.6	0.211124	0.0712445	0.0235057
590.8	0.210975	0.0713901	0.0236389
591	0.21042	0.0709821	0.0232056
591.2	0.209926	0.0708673	0.022353
591.4	0.208525	0.0700312	0.0219754
591.6	0.208285	0.0700947	0.0221359
591.8	0.207644	0.0699832	0.0224689
592	0.206886	0.0698328	0.0221895
592.2	0.206143	0.0695166	0.0219964
592.4	0.205376	0.0694905	0.0214777
592.6	0.204817	0.0690418	0.0213239
592.8	0.203962	0.0688113	0.0210929
593	0.203499	0.0689286	0.0212023
593.2	0.202958	0.0687743	0.0211425
593.4	0.203135	0.068803	0.0215772
593.6	0.203064	0.0688245	0.0211558
593.8	0.203038	0.0683784	0.0210763
594	0.203015	0.068645	0.0209769
594.2	0.203368	0.0688925	0.0209609
594.4	0.203098	0.0686231	0.0201128
594.6	0.20296	0.0685686	0.0198954
594.8	0.20247	0.0682525	0.0191272
595	0.202051	0.0676793	0.0187649
595.2	0.201896	0.0677843	0.0184564
595.4	0.201387	0.0676559	0.0183577
595.6	0.201404	0.0681043	0.0185262
595.8	0.201279	0.0681315	0.018407
596	0.201272	0.0677878	0.0181414
596.2	0.201159	0.0680186	0.0182217
596.4	0.200657	0.0682285	0.0181005
596.6	0.200614	0.0682755	0.0184274
596.8	0.200903	0.0681773	0.0188108
597	0.201331	0.0684313	0.0196027
597.2	0.200303	0.0673039	0.0191442
597.4	0.200307	0.0669965	0.0194417
597.6	0.200692	0.0674029	0.0197723
597.8	0.200163	0.0664991	0.01991
598	0.199618	0.0665158	0.0197331
598.2	0.199131	0.0660843	0.0196099
598.4	0.198636	0.0660046	0.0195032
598.6	0.19833	0.0659352	0.0199024
598.8	0.198137	0.0660208	0.0202706
599	0.197939	0.065698	0.0210058
599.2	0.198266	0.066753	0.0214722
599.4	0.198217	0.0671919	0.0213692
599.6	0.198	0.0672347	0.0215379
599.8	0.198187	0.0675622	0.0215175
600	0.198332	0.0679515	0.0217375
600.2	0.197985	0.0684827	0.0219422
600.4	0.197695	0.0689317	0.0218367
600.6	0.197588	0.0692723	0.0214344
600.8	0.19755	0.0691675	0.0214605
601	0.196892	0.0686798	0.0211237
601.2	0.195977	0.0675892	0.0205658
601.4	0.195941	0.0676083	0.0206273
601.6	0.195623	0.0672942	0.0204506
601.8	0.195022	0.0666782	0.0201218
602	0.194972	0.0670818	0.020141
602.2	0.194807	0.0668354	0.0203131
602.4	0.194108	0.0667138	0.0199207
602.6	0.193607	0.0666795	0.0201373
602.8	0.193812	0.066748	0.0204592
603	0.193304	0.0661366	0.0203366
603.2	0.192914	0.0660463	0.0201196
603.4	0.192683	0.0657135	0.0198468
603.6	0.192033	0.0652093	0.0199968
603.8	0.191835	0.0648863	0.0198609
604	0.191714	0.0645903	0.019888
604.2	0.191134	0.0645735	0.01973
604.4	0.190865	0.0646046	0.019245
604.6	0.190096	0.0639436	0.0187631
604.8	0.190069	0.063413	0.0189554
605	0.189671	0.062884	0.0184984
605.2	0.189333	0.0624331	0.0182409
605.4	0.189168	0.0622958	0.0177832
605.6	0.189067	0.0619883	0.0175886
605.8	0.189071	0.0620875	0.0175732
606	0.189039	0.062091	0.0174478
606.2	0.188561	0.0623686	0.0173678
606.4	0.188291	0.0627454	0.017166
606.6	0.188041	0.0626128	0.0175713
606.8	0.187776	0.0627345	0.0177468
607	0.187215	0.0624718	0.017733
607.2	0.187036	0.0624022	0.0178713
607.4	0.186665	0.0621685	0.017952
607.6	0.186141	0.0615863	0.0181508
607.8	0.186327	0.0618526	0.0186257
608	0.186316	0.062163	0.0190857
608.2	0.186127	0.062441	0.0195471
608.4	0.185469	0.06192	0.0195675
608.6	0.185064	0.0614428	0.0196075
608.8	0.184864	0.0616906	0.0197506
609	0.184677	0.061753	0.0194301
609.2	0.184271	0.0611499	0.019189
609.4	0.184361	0.0610049	0.0191216
609.6	0.184604	0.0611693	0.0190337
609.8	0.184324	0.0614531	0.0187606
610	0.184339	0.0615129	0.0181573
610.2	0.184183	0.0616352	0.0176884
610.4	0.184688	0.0619014	0.0180168
610.6	0.184347	0.0614212	0.0180675
610.8	0.184039	0.0613712	0.017633
611	0.18441	0.0614449	0.0177356
611.2	0.184331	0.0612619	0.0180823
611.4	0.18395	0.0614499	0.0179027
611.6	0.184619	0.0619665	0.0184387
611.8	0.184485	0.0619255	0.0187273
612	0.184245	0.0619097	0.0190373
612.2	0.183561	0.0615304	0.0190812
612.4	0.18277	0.061144	0.0191435
612.6	0.182792	0.061352	0.0193778
612.8	0.182693	0.0616351	0.0195738
613	0.182693	0.0616867	0.0196235
613.2	0.181813	0.0609068	0.0195822
613.4	0.182296	0.0610876	0.0199666
613.6	0.182365	0.0611866	0.0198197
613.8	0.181543	0.06098	0.0191416
614	0.181482	0.0606235	0.0193242
614.2	0.181331	0.0604721	0.0195931
614.4	0.181185	0.0606097	0.0196094
614.6	0.180402	0.0597549	0.0190298
614.8	0.179934	0.0599133	0.0186878
615	0.179488	0.0598438	0.0185583
615.2	0.178687	0.0595031	0.0182891
615.4	0.178258	0.059197	0.0175634
615.6	0.177759	0.0588193	0.0177797
615.8	0.177136	0.0582119	0.0173846
616	0.176589	0.0580521	0.0175228
616.2	0.176105	0.0577203	0.0171984
616.4	0.176193	0.0583123	0.0175012
616.6	0.176369	0.0588965	0.0169679
616.8	0.1765	0.0594416	0.0173953
617	0.176426	0.0599092	0.017575
617.2	0.176155	0.0600608	0.0177651
617.4	0.176787	0.0605376	0.018141
617.6	0.176746	0.0609917	0.0180667
617.8	0.176702	0.0610242	0.0184698
618	0.176828	0.0612094	0.0191695
618.2	0.176683	0.060983	0.019045
618.4	0.176332	0.0604581	0.0186714
618.6	0.175538	0.0596934	0.0183525
618.8	0.175052	0.059279	0.018205
619	0.174717	0.0585528	0.0181282
619.2	0.174865	0.058132	0.0182563
619.4	0.174702	0.0577288	0.0184374
619.6	0.17461	0.0574896	0.0191205
619.8	0.174769	0.0575783	0.0193074
620	0.174594	0.0577266	0.0190513
620.2	0.174429	0.0577304	0.0186984
620.4	0.174634	0.0583011	0.0184528
620.6	0.174647	0.0583814	0.0183119
620.8	0.174412	0.0585522	0.0187335
621	0.173987	0.0584716	0.0187514
621.2	0.173515	0.058673	0.0194335
621.4	0.173273	0.0585687	0.0194527
621.6	0.173174	0.0588607	0.0200344
621.8	0.172936	0.058583	0.0202035
622	0.172426	0.058535	0.0197624
622.2	0.171488	0.0580335	0.0190938
622.4	0.170688	0.0579082	0.0188627
622.6	0.170259	0.0578266	0.0185825
622.8	0.169922	0.0574415	0.0182791
623	0.169571	0.0574824	0.0181332
623.2	0.169169	0.0570474	0.0175199
623.4	0.168629	0.0568091	0.0171968
623.6	0.168365	0.0568215	0.0169929
623.8	0.168089	0.0568786	0.0164861
624	0.167818	0.0561259	0.0149471
624.2	0.167525	0.0560503	0.0148485
624.4	0.167861	0.055986	0.0146369
624.6	0.167916	0.0557363	0.0152774
624.8	0.167441	0.0552265	0.015239
625	0.167518	0.0552264	0.0160875
625.2	0.167905	0.0554664	0.0172253
625.4	0.168235	0.0552587	0.0173031
625.6	0.168389	0.0553963	0.0174767
625.8	0.1678	0.054998	0.0170284
626	0.167545	0.0547177	0.016974
626.2	0.167805	0.055205	0.0174559
626.4	0.167881	0.0553705	0.0178255
626.6	0.167832	0.0551783	0.0177779
626.8	0.167145	0.0546649	0.0172048
627	0.166742	0.0541404	0.0165893
627.2	0.166406	0.0539029	0.0161973
627.4	0.166214	0.0543112	0.0163218
627.6	0.165868	0.0542651	0.0163443
627.8	0.1654	0.0538553	0.0160184
628	0.165205	0.0538009	0.0154447
628.2	0.16496	0.0543233	0.0159673
628.4	0.164727	0.0543329	0.016315
628.6	0.164907	0.0544243	0.01691
628.8	0.16515	0.0545084	0.0167251
629	0.165068	0.0547055	0.0169033
629.2	0.165211	0.0545354	0.0175294
629.4	0.165	0.0542476	0.016962
629.6	0.164814	0.0541346	0.0162051
629.8	0.164556	0.0536876	0.0164211
630	0.164624	0.0535553	0.0168673
630.2	0.165018	0.0537925	0.0172857
630.4	0.164494	0.0536361	0.0169397
630.6	0.164024	0.0533727	0.0165566
630.8	0.163878	0.0527567	0.0166659
631	0.163734	0.0528304	0.0167301
631.2	0.163164	0.0530715	0.0168816
631.4	0.163091	0.0532094	0.0171861
631.6	0.16262	0.053055	0.0169594
631.8	0.162326	0.0530163	0.0170964
632	0.162344	0.0533875	0.0173627
632.2	0.162244	0.0534965	0.0180882
632.4	0.162193	0.053254	0.0185975
632.6	0.16239	0.0528789	0.0185541
632.8	0.161989	0.0530272	0.0183532
633	0.161255	0.0528129	0.0183556
633.2	0.161552	0.0523326	0.0184289
633.4	0.161161	0.0520589	0.0176639
633.6	0.161373	0.0520818	0.0176515
633.8	0.161075	0.0518113	0.0176693
634	0.16078	0.0517153	0.0173554
634.2	0.160048	0.05139	0.0164466
634.4	0.159536	0.0512458	0.0156229
634.6	0.158908	0.0508289	0.015428
634.8	0.158717	0.0506822	0.0150632
635	0.158432	0.0509947	0.014673
635.2	0.158571	0.0511885	0.0144993
635.4	0.158841	0.0516875	0.0147222
635.6	0.15865	0.0522126	0.0147943
635.8	0.1584	0.0516889	0.0149629
636	0.158248	0.0519885	0.0151507
636.2	0.158043	0.0515637	0.0152224
636.4	0.157747	0.0516441	0.0155256
636.6	0.157766	0.0520579	0.0158074
636.8	0.157782	0.0524403	0.0160395
637	0.158105	0.0525733	0.0162695
637.2	0.158256	0.0525507	0.0163622
637.4	0.157925	0.0524292	0.0161584
637.6	0.158153	0.0527786	0.016223
637.8	0.157843	0.0529477	0.0160025
638	0.157208	0.0524137	0.016014
638.2	0.156906	0.0522586	0.0159506
638.4	0.15692	0.0520745	0.0159813
638.6	0.156396	0.0518873	0.0159
638.8	0.156611	0.0516071	0.0160084
639	0.156742	0.0514773	0.0162141
639.2	0.156547	0.0513533	0.0162063
639.4	0.156401	0.0512029	0.0163785
639.6	0.155992	0.0506118	0.0163897
639.8	0.155916	0.0500183	0.0161259
640	0.155822	0.0502828	0.0162015
640.2	0.155636	0.0496154	0.0161934
640.4	0.15559	0.0496721	0.0165975
640.6	0.156086	0.0496617	0.0169705
640.8	0.15611	0.0496484	0.0169902
641	0.156012	0.0498093	0.0169217
641.2	0.155644	0.0497396	0.0167582
641.4	0.155622	0.0496653	0.0167977
641.6	0.155344	0.0500362	0.0170663
641.8	0.155529	0.050023	0.0175562
642	0.155163	0.0495335	0.0174502
642.2	0.155159	0.0500035	0.0171227
642.4	0.154411	0.0500664	0.0164771
642.6	0.153866	0.0497309	0.0163625
642.8	0.15385	0.0500578	0.0167319
643	0.15318	0.0500107	0.0157024
643.2	0.152824	0.0502151	0.0159211
643.4	0.152901	0.0505352	0.0159129
643.6	0.152668	0.0505191	0.0161455
643.8	0.152666	0.0505804	0.0159003
644	0.15222	0.0508425	0.0158987
644.2	0.151849	0.0506088	0.0158335
644.4	0.151545	0.0505863	0.0158168
644.6	0.151434	0.0505555	0.0156539
644.8	0.151417	0.0509163	0.015791
645	0.151354	0.0511805	0.0161363
645.2	0.151298	0.0511585	0.0163709
645.4	0.151675	0.0513442	0.016667
645.6	0.151673	0.0516662	0.0164747
645.8	0.152008	0.0516013	0.016515
646	0.151423	0.0517508	0.016092
646.2	0.151118	0.0518539	0.0160828
646.4	0.150593	0.0517277	0.0161786
646.6	0.150011	0.0508247	0.0159875
646.8	0.149494	0.0501491	0.0156231
647	0.148616	0.0493886	0.0148514
647.2	0.148406	0.0491342	0.0150121
647.4	0.148257	0.0486939	0.0150336
647.6	0.147977	0.0478668	0.0147383
647.8	0.147247	0.0471018	0.0139597
648	0.146467	0.0466662	0.0138631
648.2	0.146294	0.0459041	0.0136869
648.4	0.146543	0.0459482	0.0138917
648.6	0.146594	0.0460097	0.0138657
648.8	0.147024	0.0463885	0.0146103
649	0.147122	0.0464376	0.0144572
649.2	0.147267	0.0466862	0.0143731
649.4	0.14797	0.0470905	0.0145739
649.6	0.148021	0.0476141	0.0146328
649.8	0.147108	0.0474269	0.0146823
650	0.146824	0.0474832	0.0147874
650.2	0.146674	0.0470751	0.014813
650.4	0.146562	0.0469173	0.0148612
650.6	0.146093	0.0465333	0.0147077
650.8	0.145474	0.0461749	0.0145825
651	0.145428	0.0466491	0.0149217
651.2	0.145354	0.0468608	0.0153676
651.4	0.145305	0.0469466	0.0154523
651.6	0.1445	0.0469985	0.0153235
651.8	0.144249	0.0473114	0.0158445
652	0.1443	0.047158	0.0158015
652.2	0.144586	0.047185	0.0161989
652.4	0.144938	0.0476022	0.0164947
652.6	0.14435	0.0471557	0.0161705
652.8	0.144104	0.0472758	0.0158724
653	0.144298	0.0469893	0.0156054
653.2	0.144444	0.0468721	0.0154852
653.4	0.144257	0.0468613	0.0153156
653.6	0.144117	0.0466444	0.0150758
653.8	0.143777	0.0467562	0.0151539
654	0.144542	0.0466637	0.0151361
654.2	0.144849	0.0469434	0.0153361
654.4	0.145059	0.0472701	0.0155449
654.6	0.144707	0.0469602	0.0152466
654.8	0.144112	0.0465493	0.0148931
655	0.144133	0.0467287	0.0152987
655.2	0.143595	0.0470188	0.0152666
655.4	0.143226	0.0471526	0.015052
655.6	0.142935	0.0474882	0.0149599
655.8	0.142873	0.047268	0.0147438
656	0.142437	0.046677	0.0143281
656.2	0.141938	0.0461232	0.0149056
656.4	0.141623	0.0460772	0.0147819
656.6	0.140867	0.0461512	0.0146613
656.8	0.141158	0.0466426	0.0151021
657	0.141036	0.0467618	0.015471
657.2	0.14096	0.0474084	0.0158418
657.4	0.141158	0.0479593	0.0168364
657.6	0.141609	0.0479917	0.0169482
657.8	0.141724	0.0483512	0.0170667
658	0.141848	0.0484246	0.0173078
658.2	0.141584	0.0483616	0.0172211
658.4	0.141591	0.0483545	0.0169991
658.6	0.141014	0.0478213	0.0168314
658.8	0.140582	0.0477419	0.0165737
659	0.140587	0.0482437	0.0166161
659.2	0.140285	0.0482698	0.0160274
659.4	0.140045	0.0481007	0.0154632
659.6	0.139667	0.0477148	0.0145791
659.8	0.138954	0.0467886	0.0147266
660	0.13788	0.0456954	0.0142484
660.2	0.137683	0.0449895	0.0143598
660.4	0.137243	0.0448583	0.014367
660.6	0.137024	0.0450209	0.0147484
660.8	0.136749	0.0446367	0.0147633
661	0.136362	0.0444896	0.0147866
661.2	0.136141	0.0438174	0.0145689
661.4	0.135777	0.0433264	0.0142262
661.6	0.135725	0.0432024	0.0138961
661.8	0.135857	0.0432642	0.0135117
662	0.135741	0.0435116	0.0138599
662.2	0.135615	0.0435596	0.0132513
662.4	0.135989	0.0439099	0.0136
662.6	0.136074	0.0442922	0.0136964
662.8	0.136192	0.0449474	0.0142307
663	0.136563	0.0459632	0.0148564
663.2	0.13644	0.0457496	0.0147519
663.4	0.136075	0.0452489	0.0144177
663.6	0.135376	0.0447482	0.0140951
663.8	0.135327	0.0442477	0.0143198
664	0.134989	0.0438738	0.0145015
664.2	0.135523	0.0443774	0.0151787
664.4	0.135056	0.0446748	0.0151595
664.6	0.134635	0.044533	0.0148218
664.8	0.134253	0.0442912	0.0142678
665	0.134642	0.0448008	0.01466
665.2	0.13438	0.0442886	0.0143921
665.4	0.133727	0.0439088	0.0141211
665.6	0.134313	0.0445092	0.0145504
665.8	0.133993	0.0445991	0.0143243
666	0.133707	0.0446204	0.0144831
666.2	0.134021	0.0446586	0.0143672
666.4	0.133739	0.0446018	0.0147025
666.6	0.133568	0.0446786	0.0151125
666.8	0.13289	0.0442194	0.0153572
667	0.132896	0.0440891	0.0155517
667.2	0.132489	0.0432879	0.0151646
667.4	0.132464	0.0423549	0.0148928
667.6	0.132732	0.0423711	0.0151003
667.8	0.133015	0.0426082	0.0154357
668	0.132845	0.0432942	0.0160308
668.2	0.132758	0.0435993	0.0154952
668.4	0.13238	0.0438059	0.0147468
668.6	0.132246	0.0435667	0.0145833
668.8	0.132532	0.0438394	0.0146662
669	0.132375	0.0437127	0.015009
669.2	0.131456	0.042773	0.014735
669.4	0.130578	0.0424078	0.014266
669.6	0.131095	0.0429391	0.0149575
669.8	0.131081	0.0426983	0.0150871
670	0.130872	0.0421203	0.014485
670.2	0.130649	0.0419918	0.0143642
670.4	0.129982	0.0419538	0.0145205
670.6	0.130048	0.0415792	0.0144617
670.8	0.129811	0.0415236	0.0142641
671	0.129729	0.0414872	0.0144106
671.2	0.129773	0.0416222	0.0143865
671.4	0.129777	0.0414895	0.0140775
671.6	0.130093	0.0417091	0.0139454
671.8	0.129608	0.042166	0.0136415
672	0.129604	0.0422245	0.0135749
672.2	0.129406	0.0416689	0.0129621
672.4	0.128908	0.0414931	0.0125179
672.6	0.128625	0.0414621	0.0127584
672.8	0.128074	0.0408219	0.0122449
673	0.126975	0.0402606	0.0123837
673.2	0.126705	0.0403128	0.0123178
673.4	0.126496	0.0403557	0.0120815
673.6	0.126432	0.0405536	0.012192
673.8	0.126642	0.0408839	0.0120903
674	0.12623	0.0411381	0.0121572
674.2	0.126042	0.0412617	0.0125086
674.4	0.126341	0.0414003	0.0129723
674.6	0.126366	0.0408301	0.0126123
674.8	0.126485	0.0410611	0.012825
675	0.126655	0.0409637	0.0132098
675.2	0.127235	0.0411148	0.013627
675.4	0.127245	0.0407864	0.0135949
675.6	0.127293	0.0408369	0.0137557
675.8	0.127078	0.0411541	0.0139464
676	0.127077	0.0409808	0.0140098
676.2	0.126699	0.0408642	0.0139343
676.4	0.126183	0.0405527	0.013658
676.6	0.126119	0.0407717	0.0137989
676.8	0.125215	0.0403351	0.0131337
677	0.125027	0.0408475	0.0133168
677.2	0.125133	0.0416702	0.0130189
677.4	0.124741	0.0420479	0.0129738
677.6	0.12442	0.0423541	0.0128726
677.8	0.124154	0.042541	0.0128612
678	0.123584	0.0423033	0.0129983
678.2	0.12342	0.0414517	0.0123709
678.4	0.123978	0.041255	0.0123514
678.6	0.123675	0.0407507	0.0119085
678.8	0.124241	0.041118	0.0122462
679	0.124852	0.040961	0.0130508
679.2	0.124423	0.0406797	0.0132221
679.4	0.123542	0.0403296	0.0128361
679.6	0.123091	0.0404329	0.013042
679.8	0.122621	0.0397964	0.0128911
680	0.12209	0.0394111	0.0127429
680.2	0.121609	0.0390005	0.0127678
680.4	0.121845	0.0389729	0.0129522
680.6	0.121704	0.03901	0.0128814
680.8	0.121142	0.0385899	0.0126359
681	0.121386	0.0385323	0.0128771
681.2	0.120849	0.0385122	0.0126155
681.4	0.120158	0.0383019	0.012777
681.6	0.119937	0.0381868	0.0125988
681.8	0.120008	0.0384616	0.0124441
682	0.120287	0.0387502	0.0123268
682.2	0.12077	0.0388976	0.0118072
682.4	0.121311	0.039275	0.0118472
682.6	0.121228	0.0395386	0.0119112
682.8	0.121986	0.0402773	0.0127199
683	0.122103	0.0405368	0.0133713
683.2	0.121568	0.040461	0.0132689
683.4	0.121443	0.0399489	0.0124657
683.6	0.121102	0.0399984	0.0126823
683.8	0.120867	0.0396231	0.0124673
684	0.121032	0.040001	0.0126585
684.2	0.120934	0.0400605	0.0128875
684.4	0.121047	0.0397653	0.0125287
684.6	0.120699	0.0389833	0.011998
684.8	0.120163	0.0381861	0.0117743
685	0.119349	0.0375708	0.0112017
685.2	0.11882	0.0371326	0.0105238
685.4	0.118973	0.0373448	0.0110481
685.6	0.119098	0.0373823	0.0112034
685.8	0.119264	0.0378365	0.0113331
686	0.118682	0.0375008	0.01084
686.2	0.118242	0.0371792	0.0102705
686.4	0.118322	0.0371952	0.0104399
686.6	0.118395	0.0375205	0.0109978
686.8	0.118799	0.0376143	0.0113298
687	0.118057	0.0372127	0.0110678
687.2	0.118281	0.0369026	0.0107717
687.4	0.117953	0.0363939	0.0106977
687.6	0.118084	0.0369265	0.0114056
687.8	0.11811	0.0367368	0.0118913
688	0.118347	0.0371426	0.0121014
688.2	0.11778	0.037062	0.011839
688.4	0.117643	0.0362576	0.0112974
688.6	0.117595	0.0360655	0.0115761
688.8	0.117166	0.0359452	0.0115494
689	0.116712	0.0356561	0.0107667
689.2	0.11708	0.0357061	0.0110367
689.4	0.117511	0.0362846	0.0118576
689.6	0.117444	0.0360715	0.0119162
689.8	0.117339	0.0364867	0.0122524
690	0.116909	0.0360392	0.0118635
690.2	0.1169	0.0367495	0.0120901
690.4	0.117486	0.0372832	0.012773
690.6	0.117398	0.0373008	0.0129925
690.8	0.117544	0.0373744	0.0131865
691	0.116936	0.0377033	0.0131845
691.2	0.117625	0.0380117	0.0135934
691.4	0.117119	0.0378588	0.0137343
691.6	0.117065	0.0381069	0.0140031
691.8	0.116695	0.03786	0.0140233
692	0.116249	0.0381063	0.0135983
692.2	0.115855	0.0377713	0.0130478
692.4	0.115898	0.0372726	0.0129011
692.6	0.115542	0.0373303	0.0122922
692.8	0.115466	0.0369261	0.01182
693	0.114975	0.036169	0.0105508
693.2	0.115095	0.0361073	0.0107378
693.4	0.115415	0.0361668	0.0107131
693.6	0.115087	0.0356572	0.0107176
693.8	0.114169	0.0352586	0.0107603
694	0.114099	0.0351681	0.0109365
694.2	0.114022	0.0354968	0.0111818
694.4	0.11371	0.0356928	0.0116805
694.6	0.113207	0.0358069	0.0118137
694.8	0.113296	0.0364006	0.012083
695	0.112879	0.036743	0.0123487
695.2	0.112534	0.0368131	0.0124792
695.4	0.112297	0.0373582	0.0130256
695.6	0.112596	0.0377171	0.013477
695.8	0.112942	0.0383166	0.0140699
696	0.112831	0.0383252	0.0137082
696.2	0.113422	0.0388037	0.0136435
696.4	0.113443	0.0392649	0.0132485
696.6	0.113561	0.0393769	0.0129252
696.8	0.11363	0.0386549	0.0127609
697	0.113478	0.0384533	0.0121383
697.2	0.113402	0.0388027	0.0124666
697.4	0.113786	0.0383667	0.0124349
697.6	0.113206	0.0373958	0.0121246
697.8	0.112724	0.0370618	0.0121176
698	0.11304	0.0371127	0.0119117
698.2	0.113093	0.0372199	0.0118511
698.4	0.11259	0.0371755	0.0119578
698.6	0.112623	0.0370159	0.0114412
698.8	0.112552	0.0368879	0.0109712
699	0.112335	0.0364321	0.011043
699.2	0.111985	0.0361591	0.0111801
699.4	0.112036	0.0361052	0.0113085
699.6	0.111586	0.0352555	0.0107814
699.8	0.110921	0.0344754	0.0108256
700	0.110436	0.0340346	0.0103084
700.2	0.11025	0.0342429	0.010828
700.4	0.110152	0.0339337	0.0104679
700.6	0.110116	0.0336203	0.0110506
700.8	0.1096	0.0337909	0.0109176
701	0.109754	0.0344879	0.0111742
701.2	0.10895	0.0343571	0.0116399
701.4	0.108983	0.0345355	0.011844
701.6	0.108528	0.0341697	0.0117455
701.8	0.108577	0.0348667	0.0120323
702	0.108797	0.0352847	0.0119217
702.2	0.108969	0.0356367	0.0120391
702.4	0.10914	0.035595	0.0121949
702.6	0.109276	0.0356722	0.0118901
702.8	0.109478	0.0357091	0.011979
703	0.109303	0.0355907	0.0123461
703.2	0.10926	0.0359054	0.0123274
703.4	0.109119	0.0355076	0.0118612
703.6	0.108621	0.0349842	0.0116004
703.8	0.10891	0.0345637	0.0119813
704	0.109275	0.0348982	0.0123719
704.2	0.109292	0.0346646	0.0126517
704.4	0.109137	0.0338612	0.0120844
704.6	0.108682	0.0342165	0.0122217
704.8	0.108554	0.0340476	0.0116328
705	0.108188	0.0336708	0.0114182
705.2	0.107169	0.033108	0.0113564
705.4	0.107416	0.0335396	0.0118257
705.6	0.106733	0.0326641	0.0114494
705.8	0.106772	0.0326911	0.0116361
706	0.106749	0.0328676	0.0115196
706.2	0.106416	0.0328466	0.0114857
706.4	0.106518	0.0331289	0.0122375
706.6	0.106487	0.0335945	0.0121699
706.8	0.106809	0.0344267	0.012502
707	0.106873	0.0352215	0.0133589
707.2	0.106454	0.0352915	0.0132485
707.4	0.106566	0.0355652	0.0132166
707.6	0.106424	0.0356988	0.0135786
707.8	0.106658	0.0355333	0.0136795
708	0.106604	0.0357449	0.0137603
708.2	0.105973	0.0356387	0.0133439
708.4	0.105481	0.0356098	0.0127119
708.6	0.105594	0.0361776	0.0125416
708.8	0.10555	0.035732	0.0117795
709	0.105481	0.0355571	0.0115417
709.2	0.105482	0.0351198	0.0113463
709.4	0.106203	0.0351936	0.0120145
709.6	0.106436	0.0349544	0.0118519
[truncated: 1,001 more rows]

## Sheet: fig_s5_pDAm15_DAm14
Time1	1E-05	2.5E-06	6.25E-07
247.6	0.0255186	0.0109961	0.00221476
247.8	0.0272532	0.0112547	0.00258905
248	0.0295497	0.0116031	0.00335605
248.2	0.0319528	0.0118853	0.00354847
248.4	0.0347887	0.0123642	0.00382078
248.6	0.0382434	0.012935	0.00451849
248.8	0.0415137	0.0136459	0.00516998
249	0.0446038	0.0143128	0.00579044
249.2	0.0482507	0.0151678	0.00639521
249.4	0.0520192	0.016391	0.0068647
249.6	0.0558264	0.0176936	0.00783401
249.8	0.0594968	0.0192396	0.00823571
250	0.063453	0.0209993	0.00865408
250.2	0.0664528	0.0215082	0.00832058
250.4	0.0695401	0.0227401	0.00871448
250.6	0.0728493	0.023518	0.0085597
250.8	0.0762162	0.0239513	0.00877168
251	0.0791003	0.0251019	0.0084584
251.2	0.0821598	0.026262	0.00847538
251.4	0.0848185	0.0270164	0.00852165
251.6	0.0878562	0.0275533	0.00906151
251.8	0.0908175	0.0284083	0.00926944
252	0.0940409	0.0290103	0.00983379
252.2	0.0969219	0.029472	0.00951783
252.4	0.0998456	0.0296028	0.00962918
252.6	0.102889	0.0300229	0.00986148
252.8	0.105412	0.0308526	0.00982924
253	0.108328	0.0314906	0.0101739
253.2	0.111561	0.0322251	0.0101938
253.4	0.114557	0.0333325	0.0102039
253.6	0.117283	0.0339189	0.0103282
253.8	0.119851	0.0346385	0.00981177
254	0.122203	0.035158	0.00930807
254.2	0.125051	0.0360165	0.00967113
254.4	0.127443	0.0371854	0.0105028
254.6	0.129902	0.0375747	0.0102254
254.8	0.132511	0.0382658	0.0104528
255	0.135086	0.039291	0.0104662
255.2	0.138161	0.0403732	0.0113003
255.4	0.140458	0.0405533	0.0114662
255.6	0.143276	0.0412563	0.0124763
255.8	0.145353	0.0416305	0.0124918
256	0.147611	0.0416949	0.0125945
256.2	0.149916	0.0422593	0.012511
256.4	0.152599	0.0427727	0.012686
256.6	0.155197	0.0436662	0.0123315
256.8	0.157458	0.0443579	0.0126003
257	0.159912	0.044756	0.0125034
257.2	0.162609	0.0457617	0.0126193
257.4	0.165108	0.0464253	0.0125898
257.6	0.167397	0.0462877	0.0128321
257.8	0.170036	0.0468604	0.0131148
258	0.172451	0.0482278	0.0134556
258.2	0.175552	0.0495913	0.0145466
258.4	0.177754	0.050366	0.0148526
258.6	0.18096	0.0517802	0.0150418
258.8	0.183729	0.0526032	0.0152499
259	0.186779	0.0537457	0.0155833
259.2	0.189002	0.0544373	0.0158588
259.4	0.190786	0.0546962	0.0157639
259.6	0.193018	0.0554464	0.0159679
259.8	0.195045	0.0555695	0.0155117
260	0.197591	0.0563894	0.0160195
260.2	0.200926	0.0578507	0.0164935
260.4	0.203281	0.0582551	0.0165466
260.6	0.205414	0.0590126	0.0163791
260.8	0.207851	0.0591616	0.0167947
261	0.21084	0.0600879	0.0172793
261.2	0.213525	0.0608407	0.0176918
261.4	0.215655	0.0605129	0.017427
261.6	0.218177	0.060716	0.0177709
261.8	0.220478	0.0610915	0.0178932
262	0.22284	0.0622638	0.0183679
262.2	0.225618	0.0630809	0.0189968
262.4	0.22813	0.0640517	0.0193634
262.6	0.230691	0.06528	0.0192826
262.8	0.232764	0.0657415	0.0197046
263	0.235014	0.0667636	0.0200523
263.2	0.237116	0.0671632	0.0205051
263.4	0.239296	0.0680669	0.0208303
263.6	0.241719	0.0692373	0.0212557
263.8	0.244097	0.0699125	0.0214898
264	0.246956	0.0708493	0.0222942
264.2	0.249478	0.0718083	0.0219661
264.4	0.250458	0.0715494	0.0214516
264.6	0.252596	0.0723393	0.0215944
264.8	0.255024	0.0724338	0.0215657
265	0.257251	0.0728384	0.0218217
265.2	0.258753	0.0724709	0.0207613
265.4	0.261038	0.0725671	0.0203826
265.6	0.263009	0.0728129	0.0198021
265.8	0.264787	0.073356	0.020003
266	0.267255	0.0743101	0.02038
266.2	0.269992	0.0746247	0.0207014
266.4	0.272002	0.075242	0.0204245
266.6	0.274714	0.076306	0.0208321
266.8	0.276779	0.0772318	0.0214408
267	0.27907	0.0781654	0.0218996
267.2	0.281055	0.078547	0.0223655
267.4	0.283521	0.0792927	0.0227294
267.6	0.286032	0.0801261	0.0231708
267.8	0.288367	0.0803928	0.0229194
268	0.290864	0.0810771	0.0236527
268.2	0.292974	0.0818296	0.0235548
268.4	0.295107	0.0818941	0.023209
268.6	0.297788	0.0826556	0.0234258
268.8	0.300411	0.0832154	0.0235563
269	0.302832	0.0840262	0.0238461
269.2	0.304914	0.0849098	0.0236873
269.4	0.3074	0.0861641	0.0237851
269.6	0.309001	0.0868279	0.0233521
269.8	0.311538	0.0880995	0.0242109
270	0.314036	0.0890399	0.024615
270.2	0.316092	0.089548	0.0246235
270.4	0.31789	0.091029	0.0248534
270.6	0.320398	0.0919874	0.025386
270.8	0.321899	0.0923973	0.025425
271	0.323729	0.0929532	0.0260422
271.2	0.325545	0.0930168	0.0262394
271.4	0.327845	0.0934904	0.026515
271.6	0.329508	0.0936885	0.0265625
271.8	0.331462	0.0940881	0.0266927
272	0.333801	0.0948313	0.0269352
272.2	0.336086	0.0956647	0.0273052
272.4	0.338634	0.0961863	0.0271319
272.6	0.341113	0.0969532	0.0274825
272.8	0.343656	0.0979653	0.0283038
273	0.345873	0.0986687	0.0287931
273.2	0.347955	0.098744	0.0287546
273.4	0.349951	0.0989671	0.0284452
273.6	0.351767	0.0994707	0.0282265
273.8	0.353761	0.10004	0.0283141
274	0.355761	0.100561	0.0285984
274.2	0.357727	0.100898	0.028487
274.4	0.359871	0.101797	0.0290813
274.6	0.361536	0.102018	0.0286803
274.8	0.36311	0.102448	0.0286004
275	0.364935	0.102942	0.0286009
275.2	0.366793	0.102962	0.0282594
275.4	0.368735	0.103599	0.0284018
275.6	0.370647	0.104004	0.0286462
275.8	0.372977	0.10526	0.0292728
276	0.375069	0.106464	0.0295343
276.2	0.377221	0.107501	0.0295671
276.4	0.379276	0.108427	0.0300004
276.6	0.381897	0.109305	0.0305392
276.8	0.383829	0.109727	0.0310459
277	0.385714	0.110331	0.031069
277.2	0.387851	0.110893	0.0312563
277.4	0.389795	0.111622	0.0316492
277.6	0.392106	0.112455	0.0318335
277.8	0.393722	0.112547	0.0318174
278	0.396185	0.113354	0.0323222
278.2	0.39821	0.114271	0.0329645
278.4	0.399823	0.114536	0.0332245
278.6	0.401202	0.114726	0.0324042
278.8	0.403484	0.11549	0.0323316
279	0.405485	0.115708	0.0322647
279.2	0.407305	0.116325	0.0321066
279.4	0.409054	0.117128	0.0323803
279.6	0.410623	0.117169	0.0324759
279.8	0.412878	0.118568	0.0329847
280	0.414845	0.119587	0.0333032
280.2	0.416881	0.120745	0.0331781
280.4	0.418939	0.12198	0.0343298
280.6	0.42129	0.122501	0.0345441
280.8	0.422844	0.122788	0.0342225
281	0.424796	0.123394	0.0346795
281.2	0.426694	0.123406	0.0351453
281.4	0.428973	0.123596	0.0353364
281.6	0.430797	0.12397	0.0351789
281.8	0.432778	0.12419	0.035692
282	0.435295	0.124845	0.0358169
282.2	0.436852	0.125113	0.0357933
282.4	0.438596	0.125182	0.0354107
282.6	0.440328	0.125703	0.0347382
282.8	0.442699	0.12714	0.0351369
283	0.4441	0.127414	0.0352603
283.2	0.446066	0.128304	0.035487
283.4	0.447556	0.128783	0.0354899
283.6	0.449455	0.129517	0.0360034
283.8	0.451805	0.1312	0.036666
284	0.453869	0.132001	0.0369128
284.2	0.456073	0.132965	0.0367246
284.4	0.457651	0.133255	0.0366187
284.6	0.459728	0.133383	0.0367876
284.8	0.461416	0.133634	0.036677
285	0.463363	0.133931	0.0371894
285.2	0.466034	0.134694	0.0380441
285.4	0.4685	0.135203	0.0380144
285.6	0.470419	0.135397	0.0378576
285.8	0.472761	0.135506	0.0380748
286	0.474757	0.136104	0.0376549
286.2	0.476093	0.136307	0.0375062
286.4	0.478186	0.136723	0.0379974
286.6	0.479828	0.137412	0.0383186
286.8	0.481364	0.137997	0.0385693
287	0.482308	0.137786	0.0384723
287.2	0.48383	0.138418	0.0382551
287.4	0.485026	0.138722	0.0382958
287.6	0.486741	0.138928	0.0389944
287.8	0.488451	0.140171	0.039313
288	0.490253	0.140634	0.0394697
288.2	0.491825	0.14159	0.0396506
288.4	0.493272	0.142292	0.0401246
288.6	0.49526	0.14338	0.0411348
288.8	0.496728	0.144794	0.0415364
289	0.499218	0.146154	0.0426921
289.2	0.502125	0.147776	0.0436046
289.4	0.504005	0.148555	0.0434584
289.6	0.505959	0.149093	0.0432699
289.8	0.507567	0.149718	0.0433992
290	0.509717	0.150362	0.043565
290.2	0.511433	0.15047	0.0434235
290.4	0.51342	0.150884	0.0436658
290.6	0.514713	0.151365	0.0432275
290.8	0.515866	0.151258	0.0420906
291	0.517507	0.151681	0.0418584
291.2	0.519194	0.152008	0.0417791
291.4	0.520442	0.151481	0.0417045
291.6	0.521928	0.151032	0.0416468
291.8	0.522753	0.15112	0.0412594
292	0.524208	0.150906	0.0412171
292.2	0.525888	0.151783	0.0412393
292.4	0.526896	0.152064	0.0415095
292.6	0.528532	0.152618	0.041707
292.8	0.530246	0.153298	0.0418092
293	0.532719	0.153956	0.0424255
293.2	0.534451	0.155118	0.0425106
293.4	0.53626	0.155669	0.0430938
293.6	0.538445	0.156597	0.0433203
293.8	0.540526	0.157797	0.0437583
294	0.542798	0.158804	0.0441438
294.2	0.545168	0.159856	0.044385
294.4	0.547573	0.161092	0.0448555
294.6	0.549452	0.162327	0.0449488
294.8	0.55168	0.163256	0.0455161
295	0.55357	0.16405	0.0459289
295.2	0.555977	0.16508	0.0467888
295.4	0.557669	0.164958	0.0466613
295.6	0.559619	0.165444	0.0469671
295.8	0.560659	0.165592	0.0469298
296	0.562537	0.166328	0.0470784
296.2	0.564119	0.166671	0.0469771
296.4	0.564912	0.166516	0.0469066
296.6	0.566822	0.166657	0.0472789
296.8	0.567859	0.166526	0.0471771
297	0.569363	0.167201	0.0475052
297.2	0.570502	0.167109	0.0475763
297.4	0.572064	0.167088	0.0475848
297.6	0.573874	0.167492	0.0473486
297.8	0.575083	0.167511	0.0467481
298	0.576193	0.167523	0.0464774
298.2	0.577906	0.16796	0.0467148
298.4	0.579518	0.168303	0.0469418
298.6	0.580739	0.168483	0.0471445
298.8	0.582098	0.168515	0.0467854
299	0.583378	0.168947	0.0466658
299.2	0.585737	0.17007	0.0472644
299.4	0.586994	0.170124	0.0472936
299.6	0.588931	0.171453	0.0480113
299.8	0.590349	0.171814	0.0484404
300	0.592133	0.172726	0.0490666
300.2	0.594218	0.173804	0.0497617
300.4	0.595853	0.174657	0.0501544
300.6	0.597984	0.175387	0.0507951
300.8	0.599842	0.175934	0.0508361
301	0.601635	0.176566	0.050791
301.2	0.603721	0.17672	0.0505039
301.4	0.605468	0.177593	0.05043
301.6	0.607416	0.178109	0.0505511
301.8	0.608952	0.179148	0.0503993
302	0.610399	0.180111	0.050653
302.2	0.611707	0.180718	0.0509826
302.4	0.613232	0.180933	0.0508056
302.6	0.614335	0.181269	0.0504843
302.8	0.61566	0.182039	0.0499747
303	0.616996	0.18271	0.0505845
303.2	0.618604	0.183445	0.0511467
303.4	0.620099	0.1842	0.0516808
303.6	0.621298	0.184604	0.0517256
303.8	0.622334	0.184224	0.0516047
304	0.623588	0.184329	0.0517891
304.2	0.625575	0.184579	0.0518364
304.4	0.627638	0.185066	0.0523839
304.6	0.629537	0.185628	0.0526614
304.8	0.631133	0.185889	0.0526814
305	0.632427	0.18584	0.0523344
305.2	0.634236	0.186455	0.0523238
305.4	0.635905	0.187117	0.0526454
305.6	0.63748	0.187547	0.0527322
305.8	0.639021	0.188599	0.0529079
306	0.64015	0.189232	0.0528668
306.2	0.641521	0.189923	0.0530287
306.4	0.643303	0.191303	0.0533144
306.6	0.645147	0.192322	0.0530757
306.8	0.647159	0.193441	0.053594
307	0.648518	0.193733	0.0536598
307.2	0.650127	0.194728	0.0541723
307.4	0.651102	0.19542	0.0542267
307.6	0.651957	0.195012	0.0543608
307.8	0.653188	0.194852	0.0546518
308	0.65523	0.1957	0.055249
308.2	0.657502	0.196395	0.0554743
308.4	0.659474	0.196928	0.055795
308.6	0.660828	0.19718	0.0555223
308.8	0.661935	0.196812	0.055341
309	0.663468	0.197133	0.0549609
309.2	0.664634	0.197561	0.0548685
309.4	0.666084	0.198236	0.0548827
309.6	0.667146	0.198526	0.0549292
309.8	0.668956	0.19938	0.0552836
310	0.670253	0.200179	0.0552819
310.2	0.67208	0.200712	0.0559794
310.4	0.673803	0.20161	0.056338
310.6	0.675715	0.202122	0.0561128
310.8	0.677318	0.202852	0.0567033
311	0.678327	0.202909	0.0566795
311.2	0.679764	0.203159	0.0571085
311.4	0.68083	0.203491	0.0572953
311.6	0.682358	0.20363	0.0576186
311.8	0.684007	0.20408	0.0575956
312	0.685908	0.20516	0.0577896
312.2	0.687381	0.205461	0.0575281
312.4	0.688856	0.206252	0.0579169
312.6	0.690424	0.20681	0.0582575
312.8	0.691276	0.206955	0.0582841
313	0.692796	0.208276	0.0583528
313.2	0.693639	0.208497	0.0583965
313.4	0.69548	0.209638	0.0587428
313.6	0.696985	0.210262	0.0593545
313.8	0.698825	0.211232	0.0597477
314	0.699752	0.211922	0.0600468
314.2	0.701053	0.212224	0.0603538
314.4	0.702262	0.212254	0.0603199
314.6	0.703601	0.212692	0.0603871
314.8	0.704872	0.212736	0.0606653
315	0.705948	0.212506	0.0605376
315.2	0.707418	0.212864	0.0603265
315.4	0.708859	0.213408	0.060627
315.6	0.710316	0.214177	0.0610649
315.8	0.711854	0.214499	0.0613965
316	0.713223	0.215258	0.0619405
316.2	0.714654	0.215882	0.0621294
316.4	0.716753	0.216845	0.0627247
316.6	0.718185	0.217182	0.0627547
316.8	0.71955	0.217757	0.0628215
317	0.721307	0.218338	0.0624699
317.2	0.722473	0.21885	0.0624148
317.4	0.724337	0.219469	0.0624622
317.6	0.72578	0.219404	0.0627148
317.8	0.727105	0.22008	0.0627957
318	0.728843	0.220672	0.0632797
318.2	0.730533	0.2207	0.0633286
318.4	0.732228	0.220849	0.0634366
318.6	0.733979	0.221298	0.063195
318.8	0.735341	0.221569	0.0630999
319	0.736373	0.221597	0.0630976
319.2	0.737637	0.221981	0.0629992
319.4	0.738736	0.222117	0.0632454
319.6	0.740275	0.22287	0.0635835
319.8	0.741482	0.22365	0.0635073
320	0.742153	0.22424	0.0636444
320.2	0.74336	0.225305	0.0633672
320.4	0.74493	0.226503	0.0637807
320.6	0.745893	0.227289	0.0635934
320.8	0.746911	0.22786	0.0633896
321	0.747497	0.228141	0.0631457
321.2	0.748338	0.229305	0.0636693
321.4	0.749898	0.229629	0.0637694
321.6	0.751223	0.230072	0.0639448
321.8	0.752323	0.230816	0.0638066
322	0.754333	0.231214	0.0641636
322.2	0.755915	0.231387	0.0638849
322.4	0.757972	0.232256	0.0642343
322.6	0.759755	0.232634	0.0643289
322.8	0.761134	0.232587	0.0646798
323	0.762561	0.23288	0.0653144
323.2	0.764167	0.233335	0.0653666
323.4	0.765278	0.233536	0.0654948
323.6	0.766814	0.234262	0.0655461
323.8	0.768001	0.234687	0.0660739
324	0.768984	0.234863	0.0662918
324.2	0.770348	0.236195	0.0666189
324.4	0.77163	0.23663	0.0667255
324.6	0.772531	0.236692	0.0663395
324.8	0.773308	0.237499	0.0665527
325	0.773963	0.238334	0.0667142
325.2	0.774715	0.23888	0.0665631
325.4	0.775661	0.238951	0.0660231
325.6	0.776236	0.238793	0.065937
325.8	0.77719	0.23917	0.0655529
326	0.778541	0.23956	0.0657265
326.2	0.779862	0.24004	0.0660609
326.4	0.781085	0.240551	0.0662388
326.6	0.782691	0.241145	0.0668468
326.8	0.784356	0.241063	0.0669776
327	0.785202	0.241348	0.0669794
327.2	0.78652	0.2414	0.0671801
327.4	0.788211	0.241683	0.0678986
327.6	0.790213	0.241962	0.0685396
327.8	0.791866	0.242561	0.0692662
328	0.793269	0.243089	0.0691013
328.2	0.794702	0.2436	0.0691855
328.4	0.795902	0.243707	0.0688705
328.6	0.797807	0.244979	0.0695664
328.8	0.799515	0.246371	0.0700868
329	0.800819	0.247234	0.0703457
329.2	0.801739	0.247165	0.070049
329.4	0.803446	0.247834	0.0702455
329.6	0.804651	0.248996	0.0705243
329.8	0.80597	0.25017	0.0701401
330	0.807356	0.250747	0.0706331
330.2	0.808206	0.250673	0.0702854
330.4	0.809068	0.251308	0.0700925
330.6	0.810324	0.252074	0.0704657
330.8	0.811447	0.251959	0.0696994
331	0.811791	0.252088	0.069314
331.2	0.813793	0.252715	0.0702505
331.4	0.815499	0.253376	0.0704845
331.6	0.81636	0.253847	0.0701585
331.8	0.817155	0.254274	0.0698549
332	0.817939	0.253769	0.069434
332.2	0.819456	0.254104	0.0698535
332.4	0.820871	0.254697	0.070325
332.6	0.822641	0.255504	0.0709498
332.8	0.823996	0.255903	0.0709217
333	0.824981	0.25604	0.0711098
333.2	0.825789	0.255926	0.0707923
333.4	0.827119	0.256303	0.0713611
333.6	0.82835	0.257605	0.0719083
333.8	0.829453	0.258117	0.0725629
334	0.830966	0.258252	0.0730294
334.2	0.831495	0.258523	0.0729445
334.4	0.83243	0.259464	0.0737004
334.6	0.834026	0.259855	0.0739936
334.8	0.835233	0.260287	0.0742375
335	0.836568	0.261108	0.0749205
335.2	0.838457	0.262186	0.0759718
335.4	0.839536	0.262918	0.0761328
335.6	0.840259	0.26349	0.0761789
335.8	0.841441	0.263861	0.0764694
336	0.842875	0.264115	0.0767358
336.2	0.844637	0.264829	0.0773792
336.4	0.846005	0.265219	0.0772372
336.6	0.847238	0.265561	0.077181
336.8	0.84845	0.265891	0.0767413
337	0.849065	0.265481	0.0762691
337.2	0.85078	0.266146	0.0766351
337.4	0.85221	0.267297	0.0770517
337.6	0.853321	0.268077	0.0771598
337.8	0.854397	0.26869	0.077301
338	0.855393	0.268724	0.07713
338.2	0.856021	0.269009	0.0767323
338.4	0.857213	0.269561	0.0768914
338.6	0.858803	0.269852	0.0774431
338.8	0.859721	0.270428	0.0777154
339	0.861542	0.271792	0.0778419
339.2	0.862927	0.272195	0.0778132
339.4	0.864551	0.273147	0.0781244
339.6	0.865449	0.273209	0.0776023
339.8	0.866883	0.273835	0.0777505
340	0.868532	0.274302	0.0781801
340.2	0.869956	0.274962	0.0785266
340.4	0.870968	0.275387	0.0782922
340.6	0.871918	0.275795	0.0780892
340.8	0.873249	0.276146	0.0780348
341	0.874666	0.276589	0.0780342
341.2	0.876099	0.27759	0.0784513
341.4	0.8767	0.277922	0.0779174
341.6	0.87662	0.277326	0.0775186
341.8	0.877716	0.277961	0.0781729
342	0.878443	0.277836	0.0782703
342.2	0.879186	0.277775	0.0781558
342.4	0.880574	0.278661	0.0788524
342.6	0.881458	0.278746	0.0793193
342.8	0.883143	0.27974	0.0795813
343	0.88427	0.27982	0.0796875
343.2	0.885377	0.279389	0.0798707
343.4	0.886772	0.280093	0.0804243
343.6	0.887529	0.27999	0.0802176
343.8	0.888649	0.281049	0.0806083
344	0.889854	0.281526	0.0810286
344.2	0.89103	0.282463	0.08108
344.4	0.891213	0.283138	0.0805196
344.6	0.893018	0.283632	0.0806357
344.8	0.893991	0.283564	0.0797989
345	0.894912	0.284074	0.0793592
345.2	0.896189	0.284715	0.0793179
345.4	0.89724	0.284798	0.0789007
345.6	0.898437	0.285136	0.079375
345.8	0.900259	0.286195	0.0799974
346	0.900993	0.286709	0.0797526
346.2	0.902259	0.28727	0.0803702
346.4	0.903803	0.288443	0.080722
346.6	0.9051	0.289114	0.0811274
346.8	0.906663	0.289677	0.0819408
347	0.906902	0.289374	0.0817872
347.2	0.908197	0.290464	0.0821158
347.4	0.909281	0.291476	0.0824644
347.6	0.910242	0.292203	0.0830946
347.8	0.910763	0.292723	0.0835068
348	0.911694	0.293019	0.0838192
348.2	0.912297	0.293904	0.084207
348.4	0.912583	0.293699	0.0841226
348.6	0.914038	0.29335	0.0839962
348.8	0.914427	0.293211	0.0830998
349	0.915916	0.294162	0.0839515
349.2	0.91732	0.294528	0.0842271
349.4	0.918668	0.294652	0.083867
349.6	0.920408	0.295037	0.084355
349.8	0.921197	0.295836	0.0839832
350	0.922304	0.296231	0.0839538
350.2	0.923642	0.296447	0.084132
350.4	0.92526	0.297331	0.0839084
350.6	0.92619	0.298174	0.0835802
350.8	0.927332	0.298481	0.0839031
351	0.928509	0.298245	0.083162
351.2	0.92991	0.299333	0.0834755
351.4	0.930912	0.299576	0.0838495
351.6	0.931922	0.299663	0.0842009
351.8	0.932174	0.299758	0.0838009
352	0.933281	0.300156	0.0833583
352.2	0.933992	0.300639	0.0836736
352.4	0.934426	0.299937	0.0831071
352.6	0.935256	0.300494	0.0825209
352.8	0.935844	0.30093	0.0823091
353	0.937223	0.302324	0.0829186
353.2	0.938962	0.302628	0.0832284
353.4	0.940097	0.30332	0.0834802
353.6	0.940951	0.304329	0.083712
353.8	0.941453	0.304987	0.08379
354	0.942801	0.305546	0.0844153
354.2	0.943729	0.306527	0.0850437
354.4	0.945309	0.306948	0.0853463
354.6	0.946221	0.306932	0.085237
354.8	0.947374	0.306164	0.0856891
355	0.948608	0.305688	0.0856287
355.2	0.949718	0.306145	0.0860655
355.4	0.950991	0.306392	0.0869943
355.6	0.951437	0.306831	0.0867048
355.8	0.951863	0.306992	0.0864157
356	0.953305	0.308008	0.0872078
356.2	0.953904	0.308385	0.0876317
356.4	0.954509	0.308644	0.0874759
356.6	0.955316	0.309449	0.0874699
356.8	0.956199	0.309851	0.0878428
357	0.957455	0.311203	0.088395
357.2	0.958561	0.311521	0.0889261
357.4	0.958825	0.312784	0.0888821
357.6	0.959759	0.313387	0.0885467
357.8	0.960626	0.313438	0.0887121
358	0.961641	0.314447	0.0891288
358.2	0.9625	0.315064	0.0888402
358.4	0.963546	0.314796	0.0885373
358.6	0.964561	0.314752	0.0885927
358.8	0.965436	0.314629	0.0883849
359	0.967142	0.315498	0.0886869
359.2	0.968331	0.316197	0.0887122
359.4	0.969419	0.317504	0.0893531
359.6	0.970217	0.317568	0.089067
359.8	0.971751	0.318236	0.0898547
360	0.973321	0.319541	0.0903119
360.2	0.974427	0.319929	0.0901857
360.4	0.975598	0.320477	0.0903514
360.6	0.976828	0.320969	0.0909374
360.8	0.977904	0.321565	0.0915227
361	0.979456	0.32307	0.0924612
361.2	0.98061	0.323705	0.0928675
361.4	0.981217	0.323956	0.0925288
361.6	0.982359	0.324192	0.0926859
361.8	0.983059	0.324383	0.0923784
362	0.983637	0.325042	0.092239
362.2	0.984316	0.32513	0.0918897
362.4	0.984926	0.324798	0.0920317
362.6	0.985763	0.324462	0.0918222
362.8	0.986411	0.324648	0.0914742
363	0.987152	0.324957	0.0913166
363.2	0.987778	0.325153	0.0906161
363.4	0.988753	0.325428	0.090611
363.6	0.989502	0.324857	0.09006
363.8	0.990879	0.325759	0.0900433
364	0.992011	0.326378	0.0899417
364.2	0.993086	0.326882	0.0905287
364.4	0.994316	0.327957	0.0913867
364.6	0.995778	0.329105	0.092178
364.8	0.996715	0.329695	0.092781
365	0.998675	0.331153	0.0940495
365.2	0.999867	0.331503	0.0943156
365.4	1.00111	0.332067	0.0944507
365.6	1.00275	0.332522	0.0945715
365.8	1.00303	0.332437	0.0940992
366	1.00361	0.332834	0.0947938
366.2	1.00474	0.333175	0.0952548
366.4	1.00564	0.33306	0.095574
366.6	1.00616	0.333095	0.0953612
366.8	1.00656	0.333328	0.0953009
367	1.00699	0.333715	0.0952954
367.2	1.00779	0.33442	0.0949718
367.4	1.00827	0.334599	0.0949848
367.6	1.00891	0.335011	0.0950626
367.8	1.01041	0.336021	0.0954441
368	1.01119	0.336368	0.0957913
368.2	1.01206	0.33679	0.0958317
368.4	1.01329	0.337673	0.0959234
368.6	1.01436	0.338182	0.0957721
368.8	1.01559	0.338084	0.0962131
369	1.01756	0.33892	0.0964331
369.2	1.01911	0.339402	0.0967899
369.4	1.0197	0.339491	0.0965143
369.6	1.02021	0.339749	0.0963757
369.8	1.02068	0.340165	0.0965956
370	1.02239	0.340419	0.0972804
370.2	1.0234	0.340582	0.0974471
370.4	1.02374	0.340866	0.0973161
370.6	1.02382	0.340775	0.0969407
370.8	1.02489	0.341671	0.0974843
371	1.02583	0.342711	0.0979367
371.2	1.02681	0.343605	0.0977952
371.4	1.02748	0.343908	0.0978364
371.6	1.0283	0.34416	0.0977288
371.8	1.02907	0.344452	0.0976548
372	1.03025	0.345272	0.0977697
372.2	1.03114	0.345778	0.0979903
372.4	1.03183	0.346009	0.0978997
372.6	1.03242	0.346246	0.0980562
372.8	1.03342	0.346406	0.0981504
373	1.03411	0.347124	0.0978608
373.2	1.03459	0.34725	0.0979732
373.4	1.03446	0.346923	0.097446
373.6	1.03571	0.34746	0.097259
373.8	1.0369	0.347195	0.0973231
374	1.03796	0.347156	0.0974858
374.2	1.03843	0.347123	0.097154
374.4	1.03959	0.348395	0.097459
374.6	1.04098	0.348888	0.0979248
374.8	1.04269	0.349509	0.0981449
375	1.04418	0.350438	0.0983822
375.2	1.04528	0.350805	0.0986691
375.4	1.04591	0.350948	0.0986278
375.6	1.04699	0.351561	0.0991149
375.8	1.04806	0.352493	0.100045
376	1.0493	0.353318	0.100331
376.2	1.05003	0.353681	0.100845
376.4	1.05055	0.354292	0.10079
376.6	1.05084	0.35469	0.100722
376.8	1.05112	0.354697	0.0999579
377	1.05105	0.3546	0.0992178
377.2	1.05164	0.35414	0.0992275
377.4	1.05243	0.354419	0.0992261
377.6	1.05362	0.355197	0.0991868
377.8	1.05397	0.355467	0.0993847
378	1.05463	0.355893	0.0994433
378.2	1.05537	0.356683	0.0995708
378.4	1.05634	0.357802	0.0997296
378.6	1.05804	0.35836	0.099844
378.8	1.05913	0.358542	0.099592
379	1.06061	0.359689	0.100218
379.2	1.06128	0.359882	0.100671
379.4	1.06273	0.36038	0.100933
379.6	1.0646	0.361113	0.101779
379.8	1.06579	0.361568	0.102238
380	1.0666	0.361573	0.10245
380.2	1.06769	0.362378	0.103162
380.4	1.06838	0.362667	0.103505
380.6	1.06898	0.362519	0.103658
380.8	1.06944	0.362626	0.103557
381	1.07043	0.362824	0.104447
381.2	1.07183	0.363623	0.104989
381.4	1.07309	0.364503	0.105505
381.6	1.07341	0.364874	0.105734
381.8	1.0739	0.365721	0.105992
382	1.07486	0.366498	0.105943
382.2	1.07544	0.367107	0.105717
382.4	1.07645	0.367142	0.104937
382.6	1.07799	0.368008	0.105484
382.8	1.07834	0.368197	0.105048
383	1.07954	0.36883	0.104711
383.2	1.0803	0.368665	0.104478
383.4	1.0818	0.369105	0.104367
383.6	1.08221	0.369114	0.103844
383.8	1.08228	0.369034	0.103806
384	1.08267	0.368817	0.104111
384.2	1.08359	0.369793	0.104711
384.4	1.08428	0.370144	0.105021
384.6	1.08512	0.369994	0.105035
384.8	1.08589	0.370069	0.105287
385	1.08725	0.370309	0.106209
385.2	1.08829	0.371007	0.106362
385.4	1.08913	0.371066	0.106871
385.6	1.08932	0.3711	0.106834
385.8	1.09086	0.371589	0.106805
386	1.09185	0.371858	0.106472
386.2	1.09271	0.371683	0.106229
386.4	1.09359	0.372384	0.106154
386.6	1.09471	0.373283	0.106108
386.8	1.09575	0.373782	0.105709
387	1.09683	0.374321	0.105859
387.2	1.09735	0.375039	0.105835
387.4	1.09826	0.376173	0.106095
387.6	1.09893	0.37663	0.105982
387.8	1.09998	0.377435	0.106848
388	1.10068	0.377598	0.107273
388.2	1.10127	0.37811	0.107711
388.4	1.10196	0.378234	0.108175
388.6	1.10314	0.378572	0.108559
388.8	1.10394	0.378841	0.10891
389	1.10496	0.379391	0.109339
389.2	1.10599	0.379835	0.109817
389.4	1.10678	0.379665	0.109726
389.6	1.10745	0.379632	0.109398
389.8	1.10887	0.379818	0.109346
390	1.10948	0.380729	0.109318
390.2	1.11046	0.380904	0.109458
390.4	1.11074	0.382006	0.109381
390.6	1.11214	0.382577	0.10953
390.8	1.11288	0.383672	0.109564
391	1.11346	0.384603	0.109481
391.2	1.11384	0.3858	0.108825
391.4	1.11506	0.386447	0.109144
391.6	1.11593	0.386634	0.109253
391.8	1.11712	0.387114	0.109959
392	1.11769	0.38701	0.110296
392.2	1.11828	0.387558	0.110681
392.4	1.11896	0.387972	0.111035
392.6	1.11989	0.388491	0.111374
392.8	1.12075	0.388785	0.111629
393	1.12173	0.388834	0.111903
393.2	1.12223	0.388322	0.112177
393.4	1.12277	0.388209	0.111745
393.6	1.12357	0.388548	0.111735
393.8	1.124	0.388389	0.111472
394	1.12468	0.389069	0.111216
394.2	1.12534	0.388574	0.111192
394.4	1.12544	0.388787	0.111029
394.6	1.12629	0.389119	0.111132
394.8	1.12683	0.389873	0.11051
395	1.12759	0.390212	0.110636
395.2	1.12862	0.390784	0.110932
395.4	1.13055	0.391296	0.111991
395.6	1.1316	0.392192	0.112541
395.8	1.13299	0.392625	0.113184
396	1.1338	0.393199	0.11345
396.2	1.13432	0.393422	0.113844
396.4	1.13549	0.393769	0.114235
396.6	1.13673	0.394868	0.115014
396.8	1.13765	0.394884	0.114892
397	1.13864	0.394867	0.11505
397.2	1.139	0.395071	0.11515
397.4	1.13999	0.395268	0.114606
397.6	1.14047	0.395415	0.114158
397.8	1.14057	0.395372	0.113266
398	1.14136	0.395543	0.112724
398.2	1.14171	0.394901	0.112562
398.4	1.14161	0.394801	0.1122
398.6	1.14266	0.395524	0.112242
398.8	1.14362	0.396475	0.112238
399	1.14445	0.397206	0.112674
399.2	1.14554	0.397889	0.112758
399.4	1.14636	0.398661	0.113027
399.6	1.14686	0.399688	0.113205
399.8	1.1477	0.399912	0.113205
400	1.14851	0.400334	0.113382
400.2	1.14945	0.400774	0.114359
400.4	1.15062	0.401677	0.114648
400.6	1.15148	0.402437	0.115116
400.8	1.15232	0.402251	0.115109
401	1.15307	0.402974	0.115771
401.2	1.15369	0.402782	0.115951
401.4	1.15446	0.402726	0.115861
401.6	1.15487	0.402862	0.115792
401.8	1.15569	0.403033	0.116122
402	1.15654	0.402951	0.116266
402.2	1.15732	0.402965	0.116309
402.4	1.15783	0.402801	0.115878
402.6	1.15866	0.403578	0.116129
402.8	1.15868	0.403833	0.115965
403	1.15894	0.40397	0.116072
403.2	1.15898	0.404119	0.115761
403.4	1.15948	0.404337	0.115395
403.6	1.16012	0.405171	0.115238
403.8	1.1608	0.405075	0.114691
404	1.16134	0.405178	0.115041
404.2	1.16203	0.405876	0.115498
404.4	1.16254	0.406205	0.114768
404.6	1.16355	0.407283	0.115338
404.8	1.16461	0.407956	0.11563
405	1.16532	0.408473	0.115971
405.2	1.16651	0.409337	0.116663
405.4	1.16748	0.410154	0.117336
405.6	1.16899	0.410679	0.11792
405.8	1.17059	0.411648	0.118745
406	1.17164	0.412056	0.119096
406.2	1.17282	0.412657	0.119392
406.4	1.17348	0.412968	0.120022
406.6	1.17344	0.413586	0.120495
406.8	1.17363	0.413569	0.120409
407	1.17428	0.414169	0.12055
407.2	1.17501	0.414383	0.12035
407.4	1.1763	0.415019	0.120139
407.6	1.17757	0.416025	0.120442
407.8	1.17788	0.415858	0.120209
408	1.17823	0.416173	0.120037
408.2	1.17881	0.416421	0.119281
408.4	1.1797	0.417069	0.119255
408.6	1.18023	0.417787	0.119086
408.8	1.18044	0.417456	0.118354
409	1.18119	0.417695	0.118292
409.2	1.18214	0.418584	0.118639
409.4	1.18328	0.418967	0.118867
409.6	1.18454	0.419065	0.119084
409.8	1.18511	0.418973	0.11889
410	1.18548	0.418982	0.118892
410.2	1.1861	0.418997	0.11912
410.4	1.18618	0.418985	0.119208
410.6	1.18632	0.41909	0.118818
410.8	1.18744	0.418861	0.11911
411	1.18803	0.419225	0.118908
411.2	1.18898	0.419263	0.118834
411.4	1.19007	0.420127	0.119046
411.6	1.19089	0.420747	0.119326
411.8	1.19121	0.420637	0.118932
412	1.19205	0.420769	0.118831
412.2	1.19244	0.421118	0.118989
412.4	1.19377	0.422057	0.119925
412.6	1.19435	0.422464	0.119662
412.8	1.19569	0.422898	0.120638
413	1.19703	0.423831	0.121587
413.2	1.19793	0.424414	0.121865
413.4	1.19847	0.42493	0.122025
413.6	1.19842	0.425043	0.121909
413.8	1.1986	0.425674	0.121541
414	1.19915	0.425926	0.121761
414.2	1.19994	0.42624	0.122532
414.4	1.20086	0.426938	0.122907
414.6	1.20194	0.427437	0.123279
414.8	1.2029	0.428148	0.12343
415	1.20271	0.428561	0.123295
415.2	1.20365	0.428808	0.123331
415.4	1.20465	0.429851	0.123889
415.6	1.20525	0.430038	0.123701
415.8	1.20623	0.430385	0.124004
416	1.2065	0.430611	0.124117
416.2	1.20689	0.430891	0.124099
416.4	1.20869	0.431527	0.124417
416.6	1.20919	0.431342	0.124005
416.8	1.20954	0.431268	0.124278
417	1.20988	0.431289	0.124114
417.2	1.21026	0.4313	0.123993
417.4	1.20996	0.431651	0.123817
417.6	1.21067	0.431657	0.124015
417.8	1.21156	0.431524	0.123964
418	1.2127	0.431599	0.124428
418.2	1.21385	0.432316	0.125391
418.4	1.2149	0.433075	0.125719
418.6	1.21552	0.433031	0.126114
418.8	1.2161	0.433474	0.126246
419	1.21651	0.433279	0.126387
419.2	1.21776	0.433866	0.126298
419.4	1.2185	0.435068	0.12664
419.6	1.21943	0.435559	0.126645
419.8	1.22055	0.436697	0.127267
420	1.22101	0.437478	0.1269
420.2	1.22206	0.438558	0.126349
420.4	1.22365	0.439082	0.126621
420.6	1.22405	0.43945	0.126293
420.8	1.22448	0.439573	0.126497
421	1.22536	0.440195	0.126762
421.2	1.22585	0.440534	0.126792
421.4	1.22574	0.440561	0.126406
421.6	1.22666	0.440486	0.126224
421.8	1.22688	0.439947	0.125949
422	1.22744	0.44031	0.125775
422.2	1.22738	0.440019	0.12542
422.4	1.2275	0.439503	0.124996
422.6	1.22781	0.438804	0.125476
422.8	1.2284	0.439412	0.125608
423	1.22877	0.439829	0.125525
423.2	1.22942	0.440415	0.125845
423.4	1.22999	0.441134	0.12613
423.6	1.23099	0.441674	0.126625
423.8	1.23203	0.442005	0.126949
424	1.23274	0.442799	0.127042
424.2	1.23352	0.44297	0.127076
424.4	1.23448	0.443315	0.12825
424.6	1.23536	0.444023	0.128584
424.8	1.23635	0.444432	0.129174
425	1.23707	0.445328	0.129778
425.2	1.23766	0.446201	0.129936
425.4	1.23864	0.446302	0.130031
425.6	1.24023	0.446477	0.130011
425.8	1.24112	0.446569	0.130022
426	1.24149	0.446563	0.129383
426.2	1.24211	0.446945	0.129515
426.4	1.24308	0.447076	0.129866
426.6	1.24394	0.448055	0.130689
426.8	1.24469	0.448849	0.130923
427	1.24511	0.449294	0.131146
427.2	1.24596	0.449709	0.13165
427.4	1.24662	0.450072	0.131628
427.6	1.24735	0.450457	0.131715
427.8	1.24857	0.450531	0.131528
428	1.24897	0.450824	0.131663
428.2	1.24954	0.450904	0.131747
428.4	1.2502	0.451114	0.131873
428.6	1.25078	0.451593	0.131697
428.8	1.25118	0.452062	0.131696
429	1.25101	0.452309	0.131186
429.2	1.25218	0.452903	0.130957
429.4	1.25348	0.453035	0.130853
429.6	1.25371	0.453235	0.130602
429.8	1.25405	0.453689	0.130653
430	1.25437	0.454048	0.130763
430.2	1.25522	0.454666	0.130832
430.4	1.25594	0.455028	0.13148
430.6	1.25658	0.456144	0.132008
430.8	1.2571	0.456444	0.132517
431	1.25774	0.456927	0.13251
431.2	1.25899	0.457542	0.132744
431.4	1.25989	0.458053	0.132645
431.6	1.26041	0.458544	0.132186
431.8	1.26132	0.458737	0.132214
432	1.26141	0.458772	0.132617
432.2	1.26185	0.459382	0.132798
432.4	1.26245	0.459912	0.133079
432.6	1.26278	0.460937	0.133304
432.8	1.26357	0.461695	0.133757
433	1.26403	0.461762	0.133507
433.2	1.26534	0.4627	0.134228
433.4	1.26593	0.463205	0.13493
433.6	1.26619	0.463072	0.135065
433.8	1.26698	0.462941	0.134945
434	1.26762	0.463012	0.135241
434.2	1.26818	0.462394	0.135125
434.4	1.26943	0.463064	0.136071
434.6	1.26977	0.462637	0.135452
434.8	1.27046	0.462387	0.135419
435	1.27161	0.462359	0.13491
435.2	1.27204	0.462166	0.134615
435.4	1.272	0.461501	0.133745
435.6	1.27213	0.461435	0.132705
435.8	1.27256	0.461728	0.132764
436	1.27295	0.462184	0.133059
436.2	1.27363	0.462476	0.133275
436.4	1.27458	0.463626	0.133986
436.6	1.27516	0.464294	0.134193
436.8	1.27594	0.464784	0.134242
437	1.27631	0.464931	0.134277
437.2	1.27706	0.466044	0.134835
437.4	1.27749	0.466053	0.135226
437.6	1.27819	0.465924	0.135133
437.8	1.27895	0.466168	0.135398
438	1.28004	0.466698	0.136309
438.2	1.28112	0.46708	0.137048
438.4	1.2825	0.467867	0.137653
438.6	1.28274	0.468033	0.137938
438.8	1.28367	0.468747	0.13804
439	1.28399	0.468937	0.138034
439.2	1.2836	0.468823	0.13743
439.4	1.28433	0.469496	0.137533
439.6	1.28495	0.470744	0.137782
439.8	1.28515	0.471455	0.138136
440	1.28506	0.471532	0.13793
440.2	1.28521	0.471838	0.137802
440.4	1.2855	0.472475	0.138001
440.6	1.28568	0.472122	0.137431
440.8	1.28576	0.472299	0.136955
441	1.28597	0.472629	0.136913
441.2	1.28661	0.472872	0.136658
441.4	1.28697	0.472153	0.136414
441.6	1.28802	0.471865	0.136265
441.8	1.28938	0.472373	0.13613
442	1.29082	0.472322	0.136168
442.2	1.29207	0.473188	0.136619
442.4	1.29287	0.474123	0.136714
442.6	1.29371	0.474847	0.137002
442.8	1.29444	0.475448	0.136808
443	1.29549	0.475986	0.13747
443.2	1.29641	0.477064	0.138141
443.4	1.29767	0.478609	0.139325
443.6	1.2982	0.479451	0.139471
443.8	1.29854	0.480151	0.139386
444	1.29872	0.480306	0.139608
444.2	1.29956	0.481287	0.139921
444.4	1.29962	0.481123	0.139957
444.6	1.30026	0.481379	0.13964
444.8	1.30046	0.481934	0.139765
445	1.30057	0.481459	0.139148
445.2	1.30114	0.481273	0.139131
445.4	1.30165	0.480899	0.139006
445.6	1.30257	0.481092	0.138968
445.8	1.3035	0.481591	0.138859
446	1.3041	0.481764	0.13901
446.2	1.30444	0.482456	0.139169
446.4	1.30473	0.482757	0.139141
446.6	1.30517	0.482807	0.139139
446.8	1.30537	0.483113	0.139375
447	1.30588	0.483342	0.139823
447.2	1.30588	0.484157	0.140221
447.4	1.30603	0.484692	0.140196
447.6	1.30603	0.484692	0.140196
447.8	1.30574	0.48501	0.140687
448	1.30535	0.48507	0.141121
448.2	1.30464	0.48497	0.141609
448.4	1.30419	0.485141	0.142061
448.6	1.30351	0.485312	0.142549
448.8	1.3029	0.485183	0.142927
449	1.302	0.484884	0.143065
449.2	1.3011	0.485097	0.143421
449.4	1.30026	0.484999	0.143427
449.6	1.29996	0.485014	0.143501
449.8	1.29945	0.484985	0.143484
450	1.29877	0.484727	0.143218
450.2	1.29814	0.484564	0.143149
450.4	1.29727	0.483713	0.14283
450.6	1.29591	0.48272	0.142188
450.8	1.29484	0.482328	0.141847
451	1.29408	0.482523	0.141534
451.2	1.29319	0.482091	0.141271
451.4	1.29235	0.481546	0.140767
451.6	1.29106	0.481366	0.140368
451.8	1.29001	0.48113	0.139835
452	1.28881	0.481095	0.139354
452.2	1.28783	0.480895	0.139223
452.4	1.28727	0.480814	0.139099
452.6	1.28606	0.480565	0.139109
452.8	1.2847	0.479625	0.138357
453	1.28339	0.479332	0.137787
453.2	1.28239	0.479114	0.137615
453.4	1.2821	0.478879	0.137466
453.6	1.2816	0.47841	0.137498
453.8	1.28082	0.477672	0.1375
454	1.28044	0.477536	0.137153
454.2	1.28003	0.476897	0.137069
454.4	1.28	0.476404	0.136878
454.6	1.27987	0.475738	0.136434
454.8	1.27958	0.475837	0.136194
455	1.27995	0.475833	0.136566
455.2	1.27919	0.474838	0.136252
455.4	1.27926	0.475056	0.136976
455.6	1.27925	0.475674	0.137459
455.8	1.27924	0.476051	0.137588
456	1.27946	0.476776	0.138063
456.2	1.27934	0.476395	0.138175
456.4	1.27893	0.47638	0.138343
456.6	1.27809	0.476524	0.137986
456.8	1.27748	0.47621	0.13752
457	1.27657	0.475927	0.137358
457.2	1.27639	0.476078	0.137994
457.4	1.27572	0.475961	0.138305
457.6	1.27493	0.475944	0.138245
457.8	1.27483	0.475937	0.138607
458	1.27479	0.47669	0.138901
458.2	1.27456	0.476444	0.13896
458.4	1.27457	0.476401	0.139199
458.6	1.27428	0.476665	0.139089
458.8	1.27404	0.477097	0.139675
459	1.27454	0.476955	0.14027
459.2	1.27368	0.476653	0.139752
459.4	1.27391	0.477619	0.139975
459.6	1.27376	0.477989	0.139475
459.8	1.27378	0.47796	0.139578
460	1.27393	0.477435	0.139087
460.2	1.27321	0.476354	0.138256
460.4	1.27263	0.475768	0.137968
460.6	1.27197	0.474577	0.137369
460.8	1.27151	0.473515	0.137251
461	1.27079	0.472437	0.1369
461.2	1.27077	0.471997	0.136956
461.4	1.26988	0.471217	0.136576
461.6	1.26934	0.471345	0.136443
461.8	1.269	0.471351	0.137205
462	1.26826	0.471009	0.1374
462.2	1.26753	0.470724	0.136905
462.4	1.26684	0.470695	0.136994
462.6	1.26635	0.470701	0.137104
462.8	1.26575	0.470413	0.137447
463	1.26532	0.47019	0.137882
463.2	1.26459	0.470497	0.137313
463.4	1.26443	0.470968	0.137248
463.6	1.26413	0.470419	0.137071
463.8	1.26443	0.470197	0.137539
464	1.26408	0.469954	0.137005
464.2	1.26334	0.469164	0.137262
464.4	1.26342	0.469419	0.137372
464.6	1.26326	0.469291	0.136929
464.8	1.26343	0.469652	0.13687
465	1.26342	0.469525	0.136477
465.2	1.26313	0.469213	0.135809
465.4	1.26254	0.469286	0.135312
465.6	1.26184	0.469283	0.134832
465.8	1.26184	0.469295	0.135218
466	1.26107	0.468694	0.134542
466.2	1.26043	0.468778	0.13425
466.4	1.26024	0.468706	0.134686
466.6	1.25955	0.467775	0.134831
466.8	1.25879	0.46721	0.134242
467	1.25839	0.466311	0.134375
467.2	1.25783	0.466306	0.134138
467.4	1.25735	0.46577	0.134051
467.6	1.25665	0.464996	0.133925
467.8	1.2566	0.464708	0.134191
468	1.25538	0.463772	0.133877
468.2	1.25562	0.463541	0.134319
468.4	1.25592	0.46441	0.134416
468.6	1.25538	0.464415	0.134352
468.8	1.25574	0.464581	0.134581
469	1.25584	0.464759	0.134329
469.2	1.2556	0.464898	0.134489
469.4	1.25542	0.465252	0.134583
469.6	1.25563	0.465987	0.135468
469.8	1.25619	0.466571	0.13646
470	1.25582	0.46683	0.136426
470.2	1.25582	0.466878	0.136527
470.4	1.25622	0.467015	0.136543
470.6	1.25496	0.466611	0.135832
470.8	1.25461	0.467288	0.135698
471	1.2542	0.467233	0.136011
471.2	1.25389	0.467244	0.136464
471.4	1.25324	0.46666	0.136031
471.6	1.25265	0.466603	0.135836
471.8	1.25257	0.466093	0.136
472	1.25165	0.46558	0.135967
472.2	1.25189	0.465938	0.136172
472.4	1.25114	0.465675	0.13587
472.6	1.25053	0.465225	0.135737
472.8	1.25006	0.464724	0.135532
473	1.24947	0.464455	0.135478
473.2	1.24891	0.463838	0.135813
473.4	1.24801	0.462837	0.135266
473.6	1.24792	0.462749	0.135475
473.8	1.24791	0.462739	0.135481
474	1.24738	0.461971	0.134438
474.2	1.24741	0.461471	0.133995
474.4	1.24721	0.461246	0.133817
474.6	1.24569	0.460491	0.13338
474.8	1.24571	0.460382	0.133481
475	1.24563	0.459997	0.133547
475.2	1.24565	0.459626	0.134005
475.4	1.24562	0.459956	0.13406
475.6	1.24526	0.460423	0.133793
475.8	1.24516	0.460198	0.134318
476	1.24434	0.460254	0.134296
476.2	1.24452	0.460861	0.134177
476.4	1.24408	0.460614	0.134674
476.6	1.2439	0.460791	0.135154
476.8	1.24317	0.460615	0.135198
477	1.24296	0.460653	0.135011
477.2	1.24242	0.4604	0.1346
477.4	1.24257	0.46089	0.134785
477.6	1.24268	0.461291	0.134505
477.8	1.24248	0.461497	0.134581
478	1.24178	0.460605	0.133476
478.2	1.24121	0.460084	0.133358
478.4	1.24041	0.459322	0.132779
478.6	1.23927	0.458669	0.132392
478.8	1.23881	0.458257	0.132265
479	1.23841	0.457898	0.132285
479.2	1.23775	0.457589	0.131962
479.4	1.23746	0.457801	0.13196
479.6	1.2373	0.45858	0.132462
479.8	1.23744	0.458583	0.133278
480	1.23762	0.458964	0.133383
480.2	1.23825	0.45974	0.133867
480.4	1.23869	0.459399	0.134737
480.6	1.23881	0.459861	0.134912
480.8	1.23855	0.460228	0.134742
481	1.23851	0.460401	0.134641
481.2	1.23817	0.460529	0.134357
481.4	1.23853	0.460412	0.134741
481.6	1.23715	0.459457	0.133629
481.8	1.23665	0.459119	0.133747
482	1.23577	0.458643	0.133453
482.2	1.23527	0.457903	0.133017
482.4	1.23469	0.457531	0.132726
482.6	1.23405	0.457008	0.132797
482.8	1.23352	0.456225	0.133101
483	1.23311	0.455786	0.132773
483.2	1.23238	0.455493	0.132173
483.4	1.2324	0.455333	0.132444
483.6	1.2325	0.455682	0.132507
483.8	1.23291	0.455378	0.132328
484	1.2331	0.455399	0.132018
484.2	1.23297	0.455659	0.132003
484.4	1.23244	0.455147	0.131804
484.6	1.23177	0.455511	0.131686
484.8	1.23137	0.455924	0.131523
485	1.23061	0.455751	0.13177
485.2	1.22972	0.455735	0.131898
485.4	1.22945	0.455388	0.132341
485.6	1.22873	0.455472	0.132596
485.8	1.22845	0.455459	0.133304
486	1.22809	0.455167	0.133311
486.2	1.22824	0.454718	0.133633
486.4	1.2282	0.454661	0.134223
486.6	1.22808	0.454526	0.134367
486.8	1.22802	0.454537	0.134664
487	1.22791	0.454491	0.133908
487.2	1.22732	0.453938	0.133822
487.4	1.22776	0.453841	0.133948
487.6	1.22807	0.453813	0.133893
487.8	1.22859	0.454022	0.133982
488	1.2285	0.453276	0.133129
488.2	1.22859	0.453596	0.132839
488.4	1.22858	0.453631	0.132679
488.6	1.22849	0.453593	0.132223
488.8	1.22814	0.453901	0.132137
489	1.2274	0.453363	0.132017
489.2	1.22701	0.453232	0.132089
489.4	1.22681	0.453081	0.132322
489.6	1.22629	0.452992	0.131997
489.8	1.22581	0.452436	0.132078
490	1.22576	0.452297	0.132222
490.2	1.22573	0.452632	0.132407
490.4	1.22559	0.453003	0.132124
490.6	1.22515	0.453234	0.131936
490.8	1.22499	0.452763	0.132185
491	1.22432	0.451969	0.131875
491.2	1.22391	0.451558	0.132291
491.4	1.22391	0.451711	0.132675
491.6	1.22384	0.451237	0.132878
491.8	1.22373	0.451063	0.132444
492	1.22336	0.450918	0.132209
492.2	1.22287	0.451097	0.131775
492.4	1.22251	0.450877	0.131721
492.6	1.22201	0.450568	0.131396
492.8	1.22128	0.450475	0.131242
493	1.22013	0.449373	0.130469
493.2	1.21925	0.449464	0.130244
493.4	1.21838	0.449606	0.129994
493.6	1.21754	0.44924	0.129534
493.8	1.21716	0.44869	0.129131
494	1.21669	0.448878	0.129075
494.2	1.21667	0.448677	0.128441
494.4	1.21662	0.448559	0.128699
494.6	1.21607	0.448297	0.128854
494.8	1.2157	0.447682	0.128849
495	1.21527	0.447842	0.128884
495.2	1.21535	0.448046	0.129102
495.4	1.21525	0.448201	0.129661
495.6	1.21495	0.448175	0.129692
495.8	1.21472	0.448302	0.129437
496	1.21454	0.448624	0.129721
496.2	1.21498	0.44849	0.129615
496.4	1.21534	0.448814	0.130008
496.6	1.21523	0.448515	0.129884
496.8	1.21463	0.448074	0.129288
497	1.2141	0.447494	0.129151
497.2	1.21427	0.44788	0.129806
497.4	1.21446	0.447851	0.130189
497.6	1.21435	0.447383	0.12999
497.8	1.21498	0.447566	0.129911
498	1.2149	0.447383	0.130432
498.2	1.21438	0.446902	0.12996
498.4	1.21465	0.447493	0.130635
498.6	1.21406	0.447173	0.130425
498.8	1.21408	0.447238	0.130183
499	1.21383	0.447501	0.130146
499.2	1.21384	0.44753	0.130237
499.4	1.21303	0.447384	0.129946
499.6	1.21223	0.446871	0.129887
499.8	1.21192	0.446966	0.129685
500	1.21135	0.446545	0.129759
500.2	1.21144	0.446432	0.129768
500.4	1.21087	0.446475	0.129667
500.6	1.21013	0.445383	0.129461
500.8	1.20961	0.444931	0.129363
501	1.20935	0.444752	0.12964
501.2	1.20945	0.444875	0.129843
501.4	1.20903	0.44466	0.129326
501.6	1.20853	0.4451	0.129114
501.8	1.20804	0.444891	0.128861
502	1.20681	0.443888	0.12852
502.2	1.20619	0.444147	0.128736
502.4	1.20627	0.444491	0.129194
502.6	1.20547	0.443583	0.128409
502.8	1.20549	0.44418	0.12807
503	1.20518	0.444228	0.128008
503.2	1.20558	0.443932	0.128498
503.4	1.20543	0.443758	0.128536
503.6	1.20556	0.443414	0.129034
503.8	1.2054	0.443729	0.129096
504	1.20555	0.442974	0.129146
504.2	1.2063	0.443346	0.129707
504.4	1.20595	0.442953	0.129588
504.6	1.20578	0.442494	0.129265
504.8	1.20612	0.442725	0.129035
505	1.2067	0.443228	0.129305
505.2	1.20611	0.443495	0.129304
505.4	1.20535	0.443239	0.12926
505.6	1.20473	0.443054	0.129609
505.8	1.20438	0.442672	0.12929
506	1.20391	0.442019	0.129432
506.2	1.20345	0.442135	0.129308
506.4	1.20268	0.441927	0.128845
506.6	1.20209	0.441562	0.128417
506.8	1.20155	0.441772	0.128162
507	1.20119	0.441169	0.12847
507.2	1.2011	0.440872	0.128788
507.4	1.20064	0.440703	0.128371
507.6	1.19963	0.440031	0.127836
507.8	1.19913	0.440244	0.12737
508	1.19932	0.440308	0.127657
508.2	1.19925	0.440406	0.127576
508.4	1.19854	0.4404	0.126678
508.6	1.19865	0.440595	0.126636
508.8	1.19881	0.440722	0.126541
509	1.19852	0.441138	0.126463
509.2	1.19804	0.441325	0.126939
509.4	1.19831	0.441232	0.127347
509.6	1.19795	0.44139	0.127135
509.8	1.1974	0.441586	0.126596
510	1.19693	0.44103	0.126471
510.2	1.19651	0.440827	0.126477
510.4	1.19562	0.440293	0.126712
510.6	1.19545	0.439647	0.126963
510.8	1.19526	0.439463	0.127182
511	1.19499	0.439167	0.127353
511.2	1.19491	0.439532	0.127621
511.4	1.19459	0.439537	0.127535
511.6	1.19473	0.439667	0.127956
511.8	1.19485	0.439291	0.128141
512	1.19529	0.439495	0.128708
512.2	1.19517	0.438859	0.128392
512.4	1.19493	0.438212	0.127974
512.6	1.19494	0.438194	0.128126
512.8	1.19491	0.438678	0.127641
513	1.19463	0.438526	0.127354
513.2	1.19406	0.438322	0.127801
513.4	1.19325	0.43794	0.127093
513.6	1.19235	0.43783	0.126291
513.8	1.19164	0.437488	0.125964
514	1.19141	0.437504	0.125857
514.2	1.19089	0.437062	0.125665
514.4	1.1904	0.437283	0.125591
514.6	1.19027	0.437522	0.125553
514.8	1.1893	0.437601	0.125164
515	1.18878	0.438003	0.125295
515.2	1.18886	0.438694	0.125813
515.4	1.18871	0.438491	0.125517
515.6	1.18914	0.438597	0.125555
515.8	1.1886	0.438164	0.125219
516	1.18858	0.43809	0.125152
516.2	1.18846	0.437818	0.125364
516.4	1.18818	0.437317	0.125117
516.6	1.18792	0.437477	0.125171
516.8	1.18805	0.437226	0.125269
517	1.18768	0.436087	0.125279
517.2	1.18757	0.436154	0.125405
517.4	1.1877	0.43627	0.12559
517.6	1.18771	0.436506	0.126061
517.8	1.18759	0.436615	0.126358
518	1.18806	0.437436	0.127262
518.2	1.18807	0.437371	0.12715
518.4	1.18748	0.437776	0.127047
518.6	1.18658	0.436958	0.126665
518.8	1.18553	0.436657	0.126603
519	1.18548	0.436959	0.126833
519.2	1.18553	0.436556	0.126566
519.4	1.18519	0.43576	0.126078
519.6	1.18469	0.435269	0.12553
519.8	1.18348	0.43442	0.124982
520	1.18326	0.433859	0.125162
520.2	1.18298	0.433888	0.125884
520.4	1.18295	0.433128	0.125859
520.6	1.18318	0.432977	0.126375
520.8	1.18345	0.432625	0.126948
521	1.18304	0.432054	0.126838
521.2	1.18298	0.432437	0.126799
521.4	1.18318	0.432979	0.127171
521.6	1.18327	0.433177	0.127438
521.8	1.1835	0.434008	0.127553
522	1.18388	0.434371	0.128087
522.2	1.1839	0.434772	0.127309
522.4	1.18327	0.435447	0.127554
522.6	1.1829	0.434916	0.127543
522.8	1.18234	0.434591	0.127087
523	1.18253	0.434442	0.127102
523.2	1.18215	0.434366	0.127084
523.4	1.18146	0.434328	0.126498
523.6	1.18015	0.433273	0.125527
523.8	1.17958	0.432995	0.125171
524	1.17986	0.433085	0.125228
524.2	1.17972	0.433032	0.125245
524.4	1.17959	0.432822	0.124772
524.6	1.1792	0.432527	0.124489
524.8	1.1784	0.431837	0.123938
525	1.17766	0.431057	0.122924
525.2	1.17752	0.431258	0.122717
525.4	1.17819	0.43176	0.123271
525.6	1.1781	0.431479	0.123466
525.8	1.17802	0.431689	0.123558
526	1.17835	0.431157	0.124024
526.2	1.1784	0.431564	0.124374
526.4	1.17791	0.431391	0.124726
526.6	1.17785	0.430675	0.124547
526.8	1.17778	0.430612	0.124952
527	1.17762	0.431021	0.125305
527.2	1.17706	0.430956	0.125705
527.4	1.17658	0.430631	0.125463
527.6	1.17655	0.429893	0.125317
527.8	1.17651	0.430039	0.125045
528	1.17596	0.430192	0.124481
528.2	1.17518	0.4299	0.123884
528.4	1.1742	0.429612	0.123421
528.6	1.17391	0.429478	0.123398
528.8	1.17338	0.429244	0.123602
529	1.17333	0.429327	0.123828
529.2	1.17294	0.42946	0.124111
529.4	1.173	0.429161	0.124337
529.6	1.17238	0.42855	0.123622
529.8	1.17191	0.428611	0.123695
530	1.1713	0.42836	0.123777
530.2	1.17147	0.428403	0.123849
530.4	1.17131	0.42831	0.123472
530.6	1.17123	0.428097	0.123929
530.8	1.17133	0.42819	0.124414
531	1.17125	0.428108	0.124273
531.2	1.17111	0.42798	0.124752
531.4	1.17121	0.428293	0.124616
531.6	1.17138	0.428189	0.124159
531.8	1.17048	0.428091	0.123174
532	1.17042	0.428081	0.122825
532.2	1.17001	0.427982	0.122447
532.4	1.16978	0.427635	0.122456
532.6	1.16975	0.427672	0.122567
532.8	1.16908	0.427217	0.121824
533	1.16856	0.426819	0.121419
533.2	1.16769	0.425514	0.120848
533.4	1.1675	0.425305	0.120978
533.6	1.16672	0.424993	0.120396
533.8	1.16614	0.425238	0.120717
534	1.16567	0.425097	0.1208
534.2	1.16585	0.424948	0.12109
534.4	1.16597	0.425065	0.121736
534.6	1.16686	0.425156	0.122935
534.8	1.1671	0.425504	0.123105
535	1.16762	0.425809	0.123288
535.2	1.16773	0.42609	0.123664
535.4	1.16775	0.426284	0.12377
535.6	1.16749	0.426242	0.123271
535.8	1.16748	0.426212	0.123164
536	1.1674	0.426023	0.123193
536.2	1.16708	0.426063	0.12309
536.4	1.16677	0.42553	0.122873
536.6	1.16612	0.425433	0.122469
536.8	1.16557	0.425127	0.12199
537	1.16542	0.424605	0.1222
537.2	1.16471	0.424503	0.121865
537.4	1.16369	0.424207	0.121621
537.6	1.16282	0.423746	0.121252
537.8	1.16196	0.42348	0.120981
538	1.16134	0.423145	0.120936
538.2	1.16094	0.422852	0.121263
538.4	1.16106	0.422549	0.121323
538.6	1.16128	0.422671	0.121858
538.8	1.16039	0.422396	0.121264
539	1.16053	0.422349	0.121708
539.2	1.16006	0.422279	0.121869
539.4	1.15975	0.422255	0.121774
539.6	1.15937	0.422005	0.122192
539.8	1.15976	0.421728	0.122778
540	1.15966	0.421906	0.122895
540.2	1.15995	0.422041	0.123304
540.4	1.15949	0.422009	0.123116
540.6	1.15924	0.422622	0.123311
540.8	1.15943	0.422402	0.123147
541	1.15909	0.422112	0.123056
541.2	1.15833	0.421682	0.1225
541.4	1.1579	0.421185	0.122391
541.6	1.15783	0.421343	0.122161
541.8	1.15709	0.420856	0.121495
542	1.15661	0.420782	0.121279
542.2	1.15642	0.420394	0.121385
542.4	1.15606	0.420402	0.12103
542.6	1.15609	0.420491	0.12118
542.8	1.15554	0.420357	0.120609
543	1.15544	0.420631	0.120635
543.2	1.15522	0.420287	0.120623
543.4	1.15547	0.420298	0.120969
543.6	1.15547	0.42005	0.121196
543.8	1.15581	0.420107	0.12147
544	1.15567	0.420359	0.121729
544.2	1.15552	0.420353	0.121808
544.4	1.15512	0.420237	0.121716
544.6	1.15538	0.420436	0.121932
544.8	1.15549	0.420088	0.121648
545	1.1553	0.420061	0.12175
545.2	1.1549	0.419487	0.121477
545.4	1.15502	0.419783	0.122055
545.6	1.15475	0.419797	0.122044
545.8	1.15424	0.419782	0.121954
546	1.15355	0.419534	0.12175
546.2	1.15316	0.419552	0.121624
546.4	1.15249	0.419883	0.120949
546.6	1.1526	0.420253	0.121302
546.8	1.15216	0.420626	0.121293
547	1.15251	0.420943	0.121556
547.2	1.15184	0.420641	0.121584
547.4	1.15187	0.42104	0.121541
547.6	1.1513	0.42086	0.121267
547.8	1.15076	0.420552	0.121144
548	1.14998	0.419942	0.120564
548.2	1.14973	0.419886	0.119955
548.4	1.15014	0.41968	0.11998
548.6	1.15066	0.419477	0.120007
548.8	1.15057	0.418961	0.119603
549	1.1504	0.418447	0.119528
549.2	1.14984	0.418057	0.119222
549.4	1.14969	0.418142	0.1196
549.6	1.14921	0.418613	0.119288
549.8	1.14906	0.418473	0.119169
550	1.14899	0.418614	0.119812
550.2	1.14929	0.41917	0.120205
550.4	1.14948	0.419435	0.120678
550.6	1.14972	0.41977	0.121512
550.8	1.14933	0.420023	0.1214
551	1.14909	0.419551	0.121432
551.2	1.14784	0.418599	0.121046
551.4	1.14771	0.418358	0.120882
551.6	1.14725	0.417695	0.120251
551.8	1.1465	0.41644	0.119388
552	1.14615	0.416073	0.118984
552.2	1.14662	0.415937	0.118969
552.4	1.14709	0.41581	0.119353
552.6	1.147	0.41539	0.119027
552.8	1.14685	0.415474	0.118757
553	1.14605	0.415549	0.118468
553.2	1.14535	0.415688	0.118551
553.4	1.14539	0.416298	0.119084
553.6	1.14558	0.416932	0.119551
553.8	1.14578	0.416884	0.119887
554	1.14581	0.417284	0.120419
554.2	1.14532	0.417274	0.120238
554.4	1.1448	0.41703	0.120225
554.6	1.14427	0.416896	0.11975
554.8	1.1437	0.416862	0.119975
555	1.14329	0.415878	0.119424
555.2	1.14271	0.415306	0.119193
555.4	1.14225	0.414826	0.118587
555.6	1.14192	0.413642	0.118533
555.8	1.14165	0.413369	0.118673
556	1.14118	0.413103	0.118292
556.2	1.14153	0.413003	0.118436
556.4	1.1408	0.412837	0.118534
556.6	1.14035	0.412767	0.11819
556.8	1.14038	0.413305	0.118988
557	1.14008	0.41355	0.11941
557.2	1.13969	0.413837	0.119734
557.4	1.14007	0.413854	0.119903
557.6	1.14039	0.413996	0.120519
557.8	1.14046	0.41385	0.120649
558	1.1406	0.413997	0.120999
558.2	1.14026	0.414213	0.120919
558.4	1.14017	0.414273	0.121046
558.6	1.14035	0.414933	0.121133
558.8	1.14031	0.415288	0.120988
559	1.14061	0.414804	0.12029
559.2	1.1404	0.414514	0.120264
559.4	1.13982	0.414161	0.12024
559.6	1.13968	0.41336	0.120291
559.8	1.13934	0.413271	0.119745
560	1.13815	0.412193	0.118987
560.2	1.13814	0.412204	0.119028
560.4	1.13737	0.411738	0.118507
560.6	1.13688	0.4118	0.11835
560.8	1.13695	0.411866	0.118784
561	1.1364	0.411544	0.118325
561.2	1.13565	0.411023	0.117682
561.4	1.1358	0.410258	0.117644
561.6	1.1356	0.410552	0.117768
561.8	1.13535	0.410211	0.117574
562	1.13546	0.410198	0.117381
562.2	1.13491	0.410618	0.117136
562.4	1.13457	0.410501	0.117155
562.6	1.1347	0.410771	0.11715
562.8	1.13487	0.411002	0.117061
563	1.13502	0.411145	0.117838
563.2	1.13463	0.411505	0.118233
563.4	1.13385	0.41148	0.118517
563.6	1.13367	0.411788	0.118772
563.8	1.13313	0.412084	0.118627
564	1.13303	0.41255	0.119235
564.2	1.13307	0.412584	0.118602
564.4	1.13269	0.412299	0.118525
564.6	1.13227	0.412047	0.118492
564.8	1.1327	0.411853	0.118613
565	1.13192	0.411704	0.118112
565.2	1.13153	0.411064	0.11767
565.4	1.13112	0.410262	0.117226
565.6	1.13089	0.409985	0.117003
565.8	1.13101	0.409301	0.116981
566	1.13044	0.408348	0.116868
566.2	1.13011	0.408189	0.117206
566.4	1.13008	0.408077	0.117659
566.6	1.13024	0.408319	0.118163
566.8	1.12993	0.408226	0.118292
567	1.12953	0.408471	0.118949
567.2	1.12914	0.408869	0.119137
567.4	1.12905	0.409135	0.11954
567.6	1.12918	0.409835	0.120283
567.8	1.12902	0.409412	0.119814
568	1.129	0.408989	0.119992
568.2	1.12794	0.408143	0.118922
568.4	1.12781	0.408121	0.11931
568.6	1.12776	0.408148	0.119066
568.8	1.12781	0.408882	0.119514
569	1.12703	0.409204	0.118951
569.2	1.12696	0.408754	0.118389
569.4	1.12658	0.408382	0.117784
569.6	1.12627	0.408261	0.116977
569.8	1.12611	0.408209	0.116584
570	1.12551	0.407839	0.116405
570.2	1.12568	0.408276	0.116481
570.4	1.12536	0.408567	0.116194
570.6	1.12517	0.408366	0.115625
570.8	1.12479	0.408083	0.115262
571	1.12446	0.408042	0.115661
571.2	1.12423	0.407714	0.115847
571.4	1.12426	0.40682	0.115729
571.6	1.12379	0.406524	0.115596
571.8	1.12386	0.405899	0.115634
572	1.1234	0.405767	0.116354
572.2	1.12338	0.406215	0.116836
572.4	1.12368	0.407225	0.117335
572.6	1.12385	0.407583	0.117858
572.8	1.12416	0.40863	0.118679
573	1.12423	0.40815	0.118245
573.2	1.12362	0.407388	0.11806
573.4	1.12321	0.407365	0.118079
573.6	1.12258	0.406695	0.11738
573.8	1.12268	0.406617	0.117531
574	1.12214	0.406081	0.117144
574.2	1.12162	0.405971	0.116616
574.4	1.12148	0.406418	0.116482
574.6	1.12103	0.405813	0.115837
574.8	1.11994	0.404945	0.115426
575	1.11875	0.403648	0.114594
575.2	1.1186	0.403604	0.114367
575.4	1.1182	0.403127	0.113798
575.6	1.11778	0.403311	0.11353
575.8	1.1186	0.403619	0.114612
576	1.11868	0.404334	0.115233
576.2	1.1191	0.404704	0.115415
576.4	1.1189	0.404815	0.115267
576.6	1.11945	0.404685	0.115812
576.8	1.11952	0.405686	0.116632
577	1.11968	0.405169	0.117125
577.2	1.11894	0.405211	0.117488
577.4	1.11892	0.405543	0.117551
577.6	1.1193	0.405926	0.118235
577.8	1.1193	0.406298	0.118361
578	1.11882	0.406479	0.118223
578.2	1.11828	0.406567	0.117907
578.4	1.11804	0.406805	0.118133
578.6	1.11723	0.405685	0.117547
578.8	1.11626	0.404854	0.1171
579	1.11572	0.404273	0.116486
579.2	1.11539	0.404107	0.115937
579.4	1.11506	0.403457	0.115392
579.6	1.11505	0.403215	0.115105
579.8	1.11607	0.403351	0.115998
580	1.11576	0.402967	0.115861
580.2	1.11593	0.402512	0.115822
580.4	1.11552	0.402185	0.115749
580.6	1.11573	0.40242	0.116068
580.8	1.11557	0.403514	0.11686
581	1.11545	0.403395	0.11674
581.2	1.11521	0.403891	0.11676
581.4	1.11485	0.404206	0.116629
581.6	1.1148	0.404427	0.116868
581.8	1.11404	0.404054	0.116112
582	1.11395	0.404393	0.115979
582.2	1.11349	0.404336	0.115554
582.4	1.11365	0.404663	0.116017
582.6	1.11333	0.403676	0.115586
582.8	1.11322	0.403941	0.115925
583	1.11307	0.40422	0.115868
583.2	1.11245	0.403662	0.115362
583.4	1.11313	0.404263	0.116252
583.6	1.11337	0.40401	0.116556
583.8	1.11339	0.403824	0.117088
584	1.11262	0.403192	0.116721
584.2	1.11278	0.403965	0.11715
584.4	1.11241	0.403496	0.116971
584.6	1.1125	0.403576	0.116682
584.8	1.11195	0.403741	0.116631
585	1.11158	0.403093	0.115701
585.2	1.11127	0.403043	0.115624
585.4	1.11048	0.402414	0.114653
585.6	1.11018	0.402012	0.114276
585.8	1.10985	0.402035	0.113922
586	1.10916	0.401638	0.113814
586.2	1.10891	0.401404	0.114029
586.4	1.10915	0.401428	0.114298
586.6	1.10912	0.401026	0.115032
586.8	1.10932	0.401872	0.116218
587	1.10877	0.401597	0.116041
587.2	1.10886	0.40108	0.116493
587.4	1.10957	0.401465	0.117262
587.6	1.10905	0.400864	0.117163
587.8	1.10867	0.400686	0.117081
588	1.10868	0.400666	0.11716
588.2	1.10897	0.401586	0.11783
588.4	1.10925	0.400798	0.117815
588.6	1.10866	0.400716	0.117342
588.8	1.10808	0.400774	0.117373
589	1.10795	0.400706	0.117152
589.2	1.1074	0.400915	0.116868
589.4	1.10659	0.400316	0.115817
589.6	1.10648	0.400611	0.115763
589.8	1.10572	0.400107	0.11504
590	1.10506	0.39952	0.114764
590.2	1.10511	0.399489	0.114542
590.4	1.10554	0.400048	0.114671
590.6	1.10556	0.400052	0.114999
590.8	1.10525	0.399591	0.114472
591	1.10465	0.399132	0.114006
591.2	1.10457	0.399271	0.114417
591.4	1.10411	0.398974	0.114002
591.6	1.10374	0.399027	0.114174
591.8	1.10376	0.399107	0.114608
592	1.10363	0.399422	0.115354
592.2	1.10346	0.39992	0.116012
592.4	1.10359	0.399718	0.116281
592.6	1.10321	0.399515	0.116133
592.8	1.10308	0.399343	0.11632
593	1.10336	0.399218	0.116409
593.2	1.10332	0.399494	0.116111
593.4	1.10306	0.398857	0.11579
593.6	1.1036	0.399401	0.116008
593.8	1.10305	0.398714	0.115463
594	1.10261	0.398509	0.115028
594.2	1.10275	0.398617	0.114807
594.4	1.103	0.398637	0.114758
594.6	1.10229	0.397713	0.114318
594.8	1.10144	0.397106	0.11361
595	1.10038	0.396853	0.1135
595.2	1.09948	0.396794	0.113258
595.4	1.09862	0.396081	0.112696
595.6	1.09797	0.396392	0.112595
595.8	1.09747	0.396517	0.112943
596	1.09734	0.396669	0.113076
596.2	1.09715	0.396571	0.113123
596.4	1.09724	0.396596	0.113212
596.6	1.0973	0.396233	0.11366
596.8	1.09729	0.396442	0.114073
597	1.0974	0.39645	0.114297
597.2	1.09667	0.396584	0.114484
597.4	1.09638	0.396266	0.11472
597.6	1.09617	0.396352	0.115004
597.8	1.09577	0.395834	0.115407
598	1.09592	0.395788	0.115356
598.2	1.09611	0.396119	0.115658
598.4	1.09592	0.395985	0.115871
598.6	1.09581	0.395707	0.116026
598.8	1.09537	0.395888	0.115622
599	1.09516	0.395427	0.115641
599.2	1.09481	0.394719	0.115424
599.4	1.09482	0.394553	0.115025
599.6	1.09511	0.394636	0.114959
599.8	1.0953	0.394688	0.115359
600	1.09568	0.394847	0.115353
600.2	1.09529	0.394322	0.114989
600.4	1.09525	0.394564	0.115183
600.6	1.09545	0.394827	0.115128
600.8	1.0953	0.394655	0.114364
601	1.09465	0.394485	0.114397
601.2	1.09379	0.394162	0.114006
601.4	1.09417	0.394233	0.113963
601.6	1.09393	0.393835	0.113598
601.8	1.09396	0.394224	0.113377
602	1.09414	0.394482	0.112989
602.2	1.09336	0.394926	0.113191
602.4	1.09326	0.394689	0.1133
602.6	1.09329	0.395029	0.113649
602.8	1.09285	0.395253	0.113406
603	1.0925	0.394387	0.113189
603.2	1.0922	0.393694	0.113075
603.4	1.09228	0.393827	0.113286
603.6	1.09182	0.393407	0.11362
603.8	1.09128	0.393181	0.113567
604	1.09143	0.393228	0.114
604.2	1.09106	0.392872	0.113836
604.4	1.0911	0.39315	0.114148
604.6	1.09118	0.393232	0.11409
604.8	1.09081	0.392801	0.113913
605	1.0903	0.392634	0.114092
605.2	1.0904	0.392594	0.113527
605.4	1.0908	0.392854	0.113321
605.6	1.0907	0.392394	0.112671
605.8	1.09031	0.39209	0.112222
606	1.08978	0.392205	0.112016
606.2	1.08912	0.39146	0.111934
606.4	1.08919	0.391662	0.112071
606.6	1.08889	0.392047	0.11238
606.8	1.08833	0.391981	0.112222
607	1.08767	0.391544	0.112249
607.2	1.08782	0.391115	0.112616
607.4	1.08765	0.391488	0.113146
607.6	1.08715	0.391323	0.11316
607.8	1.08727	0.391633	0.113101
608	1.08726	0.391765	0.11375
608.2	1.08702	0.391653	0.114117
608.4	1.08706	0.391712	0.114507
608.6	1.08675	0.391595	0.114649
608.8	1.08648	0.391392	0.114558
609	1.08647	0.391118	0.114658
609.2	1.08677	0.39189	0.115265
609.4	1.08688	0.391699	0.115361
609.6	1.08632	0.390998	0.114643
609.8	1.08583	0.390758	0.114097
610	1.08515	0.390584	0.113168
610.2	1.08519	0.390239	0.113304
610.4	1.08488	0.390799	0.113457
610.6	1.08455	0.390681	0.113268
610.8	1.08409	0.390778	0.113194
611	1.08381	0.390876	0.112977
611.2	1.08411	0.391254	0.112968
611.4	1.08352	0.391847	0.112493
611.6	1.08344	0.391797	0.112217
611.8	1.08378	0.392617	0.112269
612	1.08386	0.392681	0.11284
612.2	1.08422	0.392347	0.113184
612.4	1.08456	0.392328	0.11348
612.6	1.08448	0.392053	0.114013
612.8	1.08488	0.392099	0.114816
613	1.08495	0.392069	0.115052
613.2	1.08508	0.392276	0.11548
613.4	1.08487	0.392013	0.11501
613.6	1.08461	0.391106	0.11442
613.8	1.08403	0.390591	0.11389
614	1.08341	0.389815	0.113418
614.2	1.08321	0.389675	0.113707
614.4	1.08246	0.389078	0.113275
614.6	1.08243	0.388772	0.113013
614.8	1.08183	0.388671	0.112996
615	1.08099	0.388358	0.112933
615.2	1.08054	0.388063	0.112878
615.4	1.0796	0.387947	0.112423
615.6	1.07926	0.387741	0.112616
615.8	1.07882	0.388023	0.112517
616	1.07864	0.387818	0.112736
616.2	1.07842	0.387366	0.112841
616.4	1.0781	0.386834	0.112914
616.6	1.07833	0.38679	0.112817
616.8	1.07869	0.386849	0.112535
617	1.07894	0.387476	0.112903
617.2	1.07887	0.387887	0.113094
617.4	1.07897	0.387846	0.11242
617.6	1.07909	0.387827	0.112609
617.8	1.07866	0.387503	0.112092
618	1.07886	0.387699	0.11199
618.2	1.0787	0.387916	0.111635
618.4	1.07862	0.387985	0.111463
618.6	1.07898	0.388244	0.111702
618.8	1.0789	0.388277	0.112071
619	1.07857	0.388076	0.112242
619.2	1.07854	0.388231	0.112481
619.4	1.07818	0.388353	0.112253
619.6	1.07744	0.387852	0.112227
619.8	1.07739	0.388441	0.112349
620	1.07735	0.388809	0.112428
620.2	1.07701	0.388673	0.112679
620.4	1.07663	0.388511	0.112617
620.6	1.077	0.388469	0.112528
620.8	1.07699	0.388411	0.112573
621	1.07653	0.388811	0.113191
621.2	1.07554	0.38826	0.112581
621.4	1.0753	0.387853	0.112053
621.6	1.07471	0.387816	0.11213
621.8	1.07439	0.387465	0.112054
622	1.07368	0.387035	0.111874
622.2	1.07314	0.38665	0.111939
622.4	1.07309	0.386314	0.111768
622.6	1.07271	0.385829	0.111197
622.8	1.07264	0.385198	0.110739
623	1.07241	0.384461	0.110558
623.2	1.072	0.383895	0.110266
623.4	1.07186	0.383636	0.109919
623.6	1.07164	0.383852	0.110012
623.8	1.07186	0.384318	0.110199
624	1.07164	0.384203	0.110238
624.2	1.07177	0.384313	0.111175
624.4	1.0718	0.384636	0.111292
624.6	1.07183	0.383999	0.111324
624.8	1.07192	0.384751	0.111679
625	1.07129	0.384936	0.111436
625.2	1.07119	0.385008	0.111553
625.4	1.07131	0.385247	0.111504
625.6	1.0716	0.385358	0.111988
625.8	1.07185	0.385375	0.112474
626	1.07184	0.384738	0.112283
626.2	1.07196	0.384951	0.112323
626.4	1.07196	0.384517	0.112086
626.6	1.0716	0.383697	0.111538
626.8	1.07145	0.383566	0.111434
627	1.0712	0.38278	0.111193
627.2	1.07096	0.382911	0.110736
627.4	1.07076	0.382841	0.110736
627.6	1.07019	0.382653	0.110448
627.8	1.06985	0.382121	0.110655
628	1.06962	0.382087	0.110667
628.2	1.06905	0.382046	0.110763
628.4	1.06871	0.38257	0.110266
628.6	1.06803	0.382278	0.109565
628.8	1.06778	0.382703	0.109141
629	1.06693	0.382796	0.108514
629.2	1.06713	0.383108	0.109131
629.4	1.06768	0.383676	0.109469
629.6	1.06767	0.38419	0.109786
629.8	1.06749	0.384577	0.109986
630	1.0673	0.384474	0.110142
630.2	1.06691	0.384426	0.110241
630.4	1.06637	0.383795	0.110329
630.6	1.06581	0.383283	0.109959
630.8	1.06519	0.382834	0.109522
631	1.06529	0.382024	0.109291
631.2	1.06509	0.381779	0.109202
631.4	1.06469	0.381028	0.109632
631.6	1.06459	0.380341	0.109478
631.8	1.06503	0.379825	0.109944
632	1.06469	0.379295	0.109636
632.2	1.06423	0.378842	0.109245
632.4	1.06399	0.379043	0.10859
632.6	1.06365	0.378875	0.108292
632.8	1.06375	0.379275	0.109061
633	1.06357	0.379605	0.109474
633.2	1.06383	0.380194	0.109872
633.4	1.06369	0.381006	0.110128
633.6	1.06345	0.382025	0.110131
633.8	1.06337	0.382064	0.110553
634	1.06305	0.381869	0.110413
634.2	1.06352	0.382843	0.110827
634.4	1.06302	0.382752	0.111174
634.6	1.06261	0.382549	0.111214
634.8	1.06266	0.382841	0.111444
635	1.06289	0.383324	0.112039
635.2	1.0625	0.383522	0.112346
635.4	1.06243	0.383175	0.112565
635.6	1.06184	0.382896	0.11213
635.8	1.06138	0.382411	0.112156
636	1.06083	0.38198	0.111742
636.2	1.05997	0.381461	0.110973
636.4	1.05919	0.381218	0.1104
636.6	1.05923	0.380823	0.110489
636.8	1.05914	0.380367	0.110478
637	1.05908	0.379995	0.110001
637.2	1.05899	0.379637	0.109822
637.4	1.05889	0.37915	0.10972
637.6	1.05873	0.378225	0.108921
637.8	1.05834	0.376969	0.109072
638	1.05823	0.376826	0.108686
638.2	1.05802	0.376673	0.108625
638.4	1.05728	0.376058	0.108747
638.6	1.05718	0.375769	0.108643
638.8	1.05736	0.376527	0.109151
639	1.05736	0.376586	0.10892
639.2	1.05782	0.376294	0.109025
639.4	1.05783	0.37627	0.109017
639.6	1.0576	0.37662	0.109372
639.8	1.05806	0.376949	0.10973
640	1.05795	0.377272	0.109767
640.2	1.05762	0.377563	0.109762
640.4	1.05758	0.378187	0.109874
640.6	1.05778	0.378357	0.109903
640.8	1.05743	0.378141	0.109536
641	1.05753	0.378165	0.109652
641.2	1.05696	0.377748	0.109772
641.4	1.05666	0.377964	0.109759
641.6	1.05628	0.37718	0.109568
641.8	1.0559	0.377618	0.110134
642	1.05552	0.377166	0.109958
642.2	1.05537	0.377181	0.110083
642.4	1.05564	0.377851	0.110986
642.6	1.0559	0.378285	0.111145
642.8	1.05577	0.378381	0.11081
643	1.05612	0.37825	0.110665
643.2	1.05568	0.377896	0.110723
643.4	1.05554	0.378346	0.110831
643.6	1.05536	0.378257	0.11094
643.8	1.05515	0.378753	0.110833
644	1.05452	0.378545	0.110217
644.2	1.05435	0.378482	0.110113
644.4	1.05379	0.377846	0.10949
644.6	1.05323	0.377317	0.108682
644.8	1.05294	0.376219	0.108066
645	1.05284	0.375943	0.108058
645.2	1.0523	0.37571	0.108189
645.4	1.05235	0.375422	0.108191
645.6	1.05236	0.37451	0.108251
645.8	1.05218	0.374619	0.108802
646	1.0524	0.374028	0.109072
646.2	1.05265	0.374612	0.109081
646.4	1.05276	0.375203	0.109713
646.6	1.05201	0.374872	0.109668
646.8	1.05217	0.374633	0.109952
647	1.05208	0.374743	0.110503
647.2	1.0523	0.375331	0.110992
[truncated: 1,001 more rows]

## Sheet: fig_s5_pDAm15_DAm15
Time1	1E-05	2.5E-06	6.25E-07
247.6	0.0116535	0.00565595	-0.00072859
247.8	0.0146323	0.00693699	9.03e-06
248	0.0178294	0.00797639	0.00033186
248.2	0.0210223	0.00885275	0.00072889
248.4	0.0244549	0.0103637	0.00138647
248.6	0.027867	0.0113043	0.0016078
248.8	0.0320423	0.0124087	0.00222927
249	0.0362978	0.0131073	0.00266906
249.2	0.0403855	0.0138838	0.0029221
249.4	0.0446105	0.015168	0.00296888
249.6	0.0481727	0.0158389	0.00287064
249.8	0.0522157	0.016865	0.00316296
250	0.0561857	0.0178805	0.00344162
250.2	0.0593689	0.0180799	0.00341155
250.4	0.0626432	0.0187554	0.00370311
250.6	0.0661637	0.0196597	0.00407695
250.8	0.0694258	0.0204882	0.00449859
251	0.0730141	0.0214019	0.00495978
251.2	0.0766212	0.0225787	0.00556719
251.4	0.0797419	0.0233311	0.0056343
251.6	0.08334	0.0249965	0.00636111
251.8	0.086923	0.0259399	0.00703993
252	0.0901433	0.0266423	0.00708406
252.2	0.0926856	0.0271782	0.00733095
252.4	0.0958536	0.0282532	0.0078304
252.6	0.0988147	0.0288019	0.00785327
252.8	0.102336	0.0294038	0.00794428
253	0.105224	0.0293978	0.00772575
253.2	0.107647	0.0298196	0.00731767
253.4	0.110428	0.0305019	0.0067283
253.6	0.113411	0.0308752	0.00622828
253.8	0.117054	0.0317084	0.00668711
254	0.119512	0.0318501	0.00648977
254.2	0.122162	0.0323926	0.00687383
254.4	0.12497	0.0332834	0.00730143
254.6	0.128302	0.0346189	0.00768801
254.8	0.131347	0.0356926	0.00846308
255	0.134943	0.0372521	0.00919237
255.2	0.138201	0.0386717	0.0100279
255.4	0.141541	0.039931	0.0108812
255.6	0.144656	0.0413477	0.0117164
255.8	0.147791	0.0422259	0.0123742
256	0.150814	0.0433322	0.01302
256.2	0.153427	0.0441932	0.0132016
256.4	0.156747	0.0460445	0.0140006
256.6	0.15971	0.0470138	0.0139295
256.8	0.16255	0.0472819	0.0137565
257	0.164723	0.0475274	0.013903
257.2	0.166857	0.0483405	0.0136516
257.4	0.16949	0.0489057	0.0129246
257.6	0.171764	0.0489806	0.0126579
257.8	0.173864	0.048827	0.0130642
258	0.176011	0.0491079	0.0130898
258.2	0.178614	0.049648	0.0131431
258.4	0.180681	0.0499138	0.0127916
258.6	0.183189	0.0506048	0.0130887
258.8	0.185699	0.0513032	0.0132173
259	0.18849	0.0520492	0.0135937
259.2	0.190567	0.0526194	0.0139722
259.4	0.193318	0.0537065	0.0147316
259.6	0.195843	0.0544487	0.0149968
259.8	0.198468	0.0553007	0.0153551
260	0.200544	0.0562086	0.0152398
260.2	0.204064	0.0580174	0.0155361
260.4	0.20699	0.0597969	0.0161617
260.6	0.209861	0.0611807	0.0165067
260.8	0.21228	0.0621196	0.0166593
261	0.2142	0.0631687	0.0165558
261.2	0.216618	0.0641345	0.0166085
261.4	0.219133	0.0647113	0.0167531
261.6	0.220939	0.064838	0.0165979
261.8	0.222949	0.0650902	0.0171105
262	0.224911	0.0654912	0.0174656
262.2	0.226887	0.0654167	0.0168889
262.4	0.228584	0.0653558	0.0166898
262.6	0.230362	0.0652421	0.0168599
262.8	0.232117	0.0653506	0.0165403
263	0.234153	0.0654402	0.0164626
263.2	0.235798	0.0659609	0.0165297
263.4	0.238259	0.066243	0.0164473
263.6	0.240192	0.0665513	0.0162487
263.8	0.242239	0.0670568	0.0164772
264	0.24518	0.0680463	0.0167575
264.2	0.247693	0.0687874	0.0170432
264.4	0.249482	0.0693861	0.0174445
264.6	0.252015	0.0703314	0.0180299
264.8	0.254005	0.0704265	0.0177599
265	0.256195	0.0711505	0.0180875
265.2	0.258716	0.0718595	0.0187026
265.4	0.260869	0.0724195	0.0190231
265.6	0.262857	0.0731455	0.0193784
265.8	0.264723	0.0737086	0.0206024
266	0.266897	0.0743061	0.0212902
266.2	0.269114	0.074618	0.0208596
266.4	0.271333	0.0748438	0.0214041
266.6	0.273546	0.0755103	0.0220013
266.8	0.275536	0.0764061	0.0220041
267	0.278035	0.0770866	0.022329
267.2	0.280229	0.0781351	0.0230326
267.4	0.282792	0.0789355	0.0231553
267.6	0.285087	0.0802327	0.0239232
267.8	0.287595	0.0814	0.0242914
268	0.289696	0.0820435	0.0244358
268.2	0.29131	0.0819845	0.0238738
268.4	0.293392	0.0827716	0.0242373
268.6	0.295479	0.0834587	0.0240073
268.8	0.297334	0.0839763	0.0239315
269	0.299301	0.0845951	0.0241737
269.2	0.3005	0.0851555	0.0242481
269.4	0.302071	0.0859103	0.0246209
269.6	0.303704	0.0865983	0.0252107
269.8	0.305013	0.0870782	0.0257437
270	0.306419	0.0874307	0.0254036
270.2	0.307327	0.0875623	0.0249592
270.4	0.30899	0.0876447	0.0253086
270.6	0.31076	0.0887658	0.0257127
270.8	0.312695	0.089711	0.0258561
271	0.315066	0.0907277	0.0264751
271.2	0.316761	0.0917092	0.0264043
271.4	0.318908	0.092709	0.0264426
271.6	0.320887	0.0938038	0.0269036
271.8	0.322712	0.0944997	0.0265308
272	0.324357	0.094559	0.0266002
272.2	0.326306	0.0948845	0.0264213
272.4	0.328437	0.0953699	0.0266143
272.6	0.330713	0.0957281	0.0267793
272.8	0.331893	0.0956378	0.0267987
273	0.333214	0.0957483	0.0265375
273.2	0.334484	0.096116	0.0265121
273.4	0.336165	0.0964424	0.0266108
273.6	0.337094	0.0962923	0.0264202
273.8	0.338359	0.096478	0.0262454
274	0.33926	0.0963085	0.0253293
274.2	0.340956	0.096737	0.0256584
274.4	0.343363	0.0973311	0.0261206
274.6	0.34552	0.0980954	0.0264362
274.8	0.347729	0.0988361	0.0268606
275	0.348553	0.0991578	0.026796
275.2	0.350036	0.099152	0.0270511
275.4	0.351789	0.0995036	0.027453
275.6	0.353399	0.100216	0.0280998
275.8	0.354883	0.10062	0.0281923
276	0.356422	0.100744	0.028391
276.2	0.357902	0.101019	0.0287549
276.4	0.359723	0.101043	0.0286806
276.6	0.360948	0.101395	0.0290528
276.8	0.361599	0.101473	0.0288412
277	0.363465	0.102297	0.0288463
277.2	0.364665	0.103294	0.0288224
277.4	0.365943	0.103731	0.028545
277.6	0.367094	0.104486	0.0282862
277.8	0.369265	0.105612	0.0285163
278	0.371168	0.10687	0.0290706
278.2	0.373347	0.108131	0.0292999
278.4	0.37476	0.108354	0.0295978
278.6	0.376707	0.108984	0.0300212
278.8	0.378492	0.10986	0.0305432
279	0.379502	0.110269	0.0305484
279.2	0.381392	0.110921	0.0310033
279.4	0.382536	0.111028	0.0307308
279.6	0.383794	0.111431	0.0305945
279.8	0.385413	0.111547	0.0308242
280	0.386905	0.111502	0.0310228
280.2	0.387836	0.111229	0.0313528
280.4	0.389438	0.1114	0.031316
280.6	0.390446	0.111568	0.0316085
280.8	0.391571	0.111847	0.0313463
281	0.392673	0.11212	0.0310026
281.2	0.394043	0.11256	0.0306207
281.4	0.395568	0.112746	0.0306568
281.6	0.397138	0.113862	0.0312141
281.8	0.39913	0.11467	0.031691
282	0.400219	0.114787	0.0316087
282.2	0.401564	0.115096	0.0316642
282.4	0.402712	0.115172	0.0319222
282.6	0.404679	0.115833	0.0319451
282.8	0.405467	0.116319	0.0315124
283	0.406478	0.117062	0.0312721
283.2	0.407574	0.117431	0.0311922
283.4	0.40882	0.117474	0.0312095
283.6	0.410332	0.11818	0.031452
283.8	0.411689	0.11878	0.0319864
284	0.412229	0.118932	0.0319312
284.2	0.41324	0.119613	0.0323234
284.4	0.414984	0.12024	0.0326022
284.6	0.41667	0.121438	0.0332383
284.8	0.418011	0.121757	0.0331856
285	0.419491	0.122057	0.0337306
285.2	0.421423	0.122443	0.0342321
285.4	0.422612	0.123296	0.0344735
285.6	0.423851	0.124178	0.0352307
285.8	0.425321	0.124446	0.0354669
286	0.42668	0.124716	0.0360507
286.2	0.428064	0.125409	0.0364408
286.4	0.429423	0.125735	0.0362589
286.6	0.430748	0.125886	0.0358862
286.8	0.43132	0.126257	0.0358551
287	0.433155	0.1268	0.0362351
287.2	0.434585	0.126942	0.0361322
287.4	0.435632	0.12734	0.0361292
287.6	0.43608	0.127341	0.0355583
287.8	0.436738	0.127798	0.0355637
288	0.437181	0.127057	0.035269
288.2	0.438604	0.127651	0.0354172
288.4	0.440044	0.127406	0.0348657
288.6	0.441217	0.127816	0.0350716
288.8	0.442031	0.127466	0.0348189
289	0.443027	0.127669	0.0349178
289.2	0.44437	0.127866	0.0348763
289.4	0.445644	0.128875	0.0350037
289.6	0.446734	0.129091	0.0354331
289.8	0.448359	0.129731	0.0357228
290	0.449619	0.130346	0.0360065
290.2	0.450775	0.131107	0.035523
290.4	0.452557	0.132011	0.0359016
290.6	0.453638	0.132477	0.0359624
290.8	0.455031	0.133432	0.0364645
291	0.456954	0.134404	0.0366697
291.2	0.457648	0.13529	0.0365591
291.4	0.458965	0.135971	0.0369144
291.6	0.460224	0.136539	0.0372197
291.8	0.46161	0.137647	0.0382511
292	0.462387	0.137203	0.0381871
292.2	0.463559	0.137879	0.0384759
292.4	0.464628	0.137859	0.0384751
292.6	0.466	0.13833	0.0395387
292.8	0.467775	0.138769	0.0399441
293	0.468648	0.13862	0.039913
293.2	0.469963	0.138871	0.0404173
293.4	0.470936	0.139278	0.0406388
293.6	0.471722	0.138921	0.0404978
293.8	0.472319	0.138706	0.0406013
294	0.472981	0.138198	0.0400684
294.2	0.473708	0.138252	0.0397821
294.4	0.474259	0.138297	0.0396374
294.6	0.474635	0.138415	0.039609
294.8	0.475297	0.138957	0.0394671
295	0.476217	0.139537	0.0393593
295.2	0.476874	0.140426	0.0395362
295.4	0.478245	0.140964	0.0396104
295.6	0.479381	0.141948	0.0402853
295.8	0.479702	0.142292	0.0404257
296	0.48086	0.142431	0.0408202
296.2	0.482251	0.143124	0.0413662
296.4	0.483518	0.143709	0.0417589
296.6	0.485103	0.143985	0.0423585
296.8	0.48672	0.144347	0.0422294
297	0.487352	0.144321	0.0417732
297.2	0.488382	0.144598	0.0419704
297.4	0.489779	0.144845	0.0420927
297.6	0.490937	0.145024	0.0424898
297.8	0.491705	0.145351	0.0423436
298	0.492653	0.145568	0.0422248
298.2	0.493568	0.14632	0.0423108
298.4	0.494426	0.146679	0.0418376
298.6	0.495565	0.147076	0.0421715
298.8	0.496413	0.147731	0.0419767
299	0.497629	0.148714	0.0424642
299.2	0.498561	0.149023	0.0423615
299.4	0.499797	0.149465	0.042462
299.6	0.500787	0.149805	0.0428178
299.8	0.501221	0.149566	0.0433568
300	0.502448	0.149783	0.0440265
300.2	0.502954	0.149419	0.0438744
300.4	0.503373	0.149448	0.0440793
300.6	0.504597	0.149689	0.0445203
300.8	0.505591	0.149833	0.0442628
301	0.506221	0.149973	0.044174
301.2	0.507294	0.150616	0.0444988
301.4	0.508096	0.150914	0.0443526
301.6	0.509471	0.151789	0.0446255
301.8	0.510378	0.152054	0.0443441
302	0.511	0.152421	0.0440244
302.2	0.512118	0.153139	0.0440898
302.4	0.513279	0.154044	0.0442829
302.6	0.51415	0.154646	0.0447249
302.8	0.514781	0.155538	0.0446136
303	0.516111	0.156547	0.0456382
303.2	0.516975	0.156412	0.0453803
303.4	0.517989	0.157163	0.0458691
303.6	0.518266	0.157398	0.0461138
303.8	0.519052	0.157712	0.0469965
304	0.519638	0.158158	0.0467576
304.2	0.52041	0.158384	0.046847
304.4	0.521973	0.15943	0.0477729
304.6	0.522837	0.159278	0.047259
304.8	0.523317	0.158896	0.0466517
305	0.523985	0.158853	0.0462859
305.2	0.524219	0.158365	0.0453687
305.4	0.524932	0.157985	0.0451165
305.6	0.526518	0.15835	0.0454796
305.8	0.526669	0.158012	0.0449429
306	0.527162	0.158546	0.0448541
306.2	0.527941	0.158609	0.0450034
306.4	0.528838	0.15914	0.0454775
306.6	0.529355	0.158949	0.0450957
306.8	0.529675	0.159371	0.0449796
307	0.530647	0.160091	0.045465
307.2	0.531232	0.160002	0.0453728
307.4	0.532207	0.160602	0.0458777
307.6	0.533174	0.161403	0.0461739
307.8	0.534254	0.161628	0.0463476
308	0.535194	0.162105	0.0470181
308.2	0.536104	0.162058	0.0469169
308.4	0.537345	0.162711	0.0472932
308.6	0.537578	0.162467	0.0469319
308.8	0.538015	0.162264	0.0471781
309	0.538847	0.162589	0.0474129
309.2	0.540069	0.163016	0.0475784
309.4	0.541412	0.163365	0.0483764
309.6	0.542016	0.16344	0.0486532
309.8	0.54237	0.163777	0.0483541
310	0.542683	0.163798	0.0484274
310.2	0.543098	0.163663	0.0483795
310.4	0.543678	0.164493	0.048998
310.6	0.544442	0.165088	0.0487572
310.8	0.544931	0.165591	0.0487027
311	0.546404	0.166269	0.0491388
311.2	0.54745	0.166456	0.0490253
311.4	0.548215	0.166998	0.0485748
311.6	0.548873	0.167512	0.0481984
311.8	0.549261	0.16664	0.047807
312	0.550116	0.16711	0.0482715
312.2	0.550821	0.167168	0.0476479
312.4	0.55151	0.167266	0.0481237
312.6	0.55233	0.167444	0.0483588
312.8	0.552722	0.167707	0.0486073
313	0.553571	0.168333	0.0484634
313.2	0.554318	0.168609	0.0483332
313.4	0.554382	0.168368	0.048392
313.6	0.55516	0.168973	0.0486387
313.8	0.555922	0.169697	0.048509
314	0.556394	0.169698	0.0491613
314.2	0.557435	0.170444	0.0498898
314.4	0.55894	0.171623	0.0508802
314.6	0.559761	0.172185	0.0510939
314.8	0.560534	0.172545	0.0511754
315	0.561386	0.172895	0.0512613
315.2	0.562202	0.172829	0.0509541
315.4	0.562835	0.172683	0.0506775
315.6	0.564104	0.172633	0.0511808
315.8	0.564853	0.172343	0.0514008
316	0.565541	0.172793	0.0517563
316.2	0.566201	0.173096	0.0519972
316.4	0.5675	0.173724	0.0526503
316.6	0.569117	0.175055	0.0533185
316.8	0.569503	0.175312	0.0532176
317	0.569929	0.175425	0.0523649
317.2	0.570637	0.175616	0.05223
317.4	0.571219	0.175845	0.0520363
317.6	0.572402	0.176688	0.0521413
317.8	0.573072	0.177063	0.051827
318	0.573506	0.177152	0.0522874
318.2	0.574437	0.177615	0.0523684
318.4	0.575198	0.177847	0.0525917
318.6	0.57526	0.177973	0.0521503
318.8	0.575829	0.177639	0.0520341
319	0.576545	0.177463	0.0518465
319.2	0.577875	0.177859	0.0524908
319.4	0.578434	0.178174	0.0524738
319.6	0.579331	0.178435	0.0526808
319.8	0.578937	0.178394	0.0520545
320	0.579608	0.179268	0.0520031
320.2	0.58062	0.180057	0.0526594
320.4	0.581689	0.180358	0.0530476
320.6	0.581571	0.180302	0.0529089
320.8	0.5817	0.180245	0.0522773
321	0.581612	0.179956	0.051982
321.2	0.582427	0.180276	0.0522814
321.4	0.582932	0.180762	0.052679
321.6	0.5833	0.180707	0.0528395
321.8	0.583599	0.180628	0.0526656
322	0.583597	0.180752	0.0533456
322.2	0.584012	0.180517	0.0530685
322.4	0.584341	0.180415	0.053314
322.6	0.584578	0.18044	0.0534388
322.8	0.584541	0.179954	0.0533078
323	0.584737	0.179859	0.0531964
323.2	0.585487	0.180516	0.0536046
323.4	0.585812	0.180677	0.0534525
323.6	0.586689	0.180608	0.0533023
323.8	0.587088	0.181049	0.053383
324	0.588364	0.181855	0.0537027
324.2	0.589132	0.182185	0.0542036
324.4	0.589902	0.182517	0.0543667
324.6	0.590332	0.182706	0.0545101
324.8	0.591768	0.18334	0.0544756
325	0.592935	0.183668	0.0553949
325.2	0.594316	0.184718	0.0559839
325.4	0.595107	0.184834	0.0562438
325.6	0.595595	0.184921	0.0557824
325.8	0.596237	0.185399	0.0561301
326	0.596607	0.185605	0.0562085
326.2	0.597087	0.185489	0.0560546
326.4	0.597244	0.185526	0.0562218
326.6	0.597184	0.185239	0.0559242
326.8	0.597149	0.184691	0.0554081
327	0.597274	0.184634	0.0553818
327.2	0.598487	0.185064	0.0557715
327.4	0.599169	0.185203	0.0561389
327.6	0.599836	0.185402	0.055766
327.8	0.600055	0.185358	0.0552719
328	0.600251	0.185255	0.0548288
328.2	0.600533	0.186057	0.0548573
328.4	0.600917	0.186022	0.0548271
328.6	0.601386	0.186618	0.0548271
328.8	0.602214	0.187084	0.0545905
329	0.603314	0.187584	0.055028
329.2	0.603827	0.188112	0.0548838
329.4	0.604752	0.188329	0.0550667
329.6	0.604977	0.188802	0.0547618
329.8	0.605754	0.188627	0.055356
330	0.606412	0.189201	0.0554643
330.2	0.606538	0.188752	0.0556184
330.4	0.60655	0.188338	0.0552641
330.6	0.607846	0.18877	0.0559639
330.8	0.60864	0.188941	0.0563026
331	0.609267	0.189037	0.0567314
331.2	0.609664	0.188806	0.0566361
331.4	0.609976	0.188763	0.0564212
331.6	0.610618	0.188704	0.0561601
331.8	0.610985	0.188453	0.0561173
332	0.611612	0.188845	0.0564771
332.2	0.612141	0.189732	0.0564417
332.4	0.612796	0.189884	0.0566032
332.6	0.613481	0.190635	0.0569296
332.8	0.613671	0.190281	0.0565304
333	0.61438	0.190479	0.0566817
333.2	0.615351	0.19145	0.0569474
333.4	0.616177	0.19145	0.0573959
333.6	0.616911	0.191677	0.057581
333.8	0.617688	0.191494	0.0578843
334	0.617471	0.191772	0.0573692
334.2	0.61785	0.191993	0.0574152
334.4	0.618481	0.192497	0.0572568
334.6	0.619734	0.193678	0.0577782
334.8	0.619659	0.194086	0.0576759
335	0.619597	0.193821	0.0571578
335.2	0.619241	0.193944	0.0564622
335.4	0.619578	0.194693	0.0565938
335.6	0.62055	0.195611	0.0570793
335.8	0.620606	0.196008	0.0570092
336	0.620481	0.19607	0.0566772
336.2	0.620909	0.19624	0.0565333
336.4	0.621345	0.19594	0.0569558
336.6	0.621574	0.195996	0.0568364
336.8	0.621481	0.195868	0.0566089
337	0.622491	0.196122	0.0571032
337.2	0.623805	0.196819	0.0574577
337.4	0.624285	0.196665	0.05777
337.6	0.625191	0.197439	0.0581576
337.8	0.625304	0.197166	0.057618
338	0.625724	0.197802	0.0576743
338.2	0.626848	0.198503	0.0584725
338.4	0.627245	0.198674	0.0584638
338.6	0.628211	0.199334	0.0586177
338.8	0.628701	0.199302	0.0587746
339	0.628751	0.198763	0.0583012
339.2	0.629122	0.199022	0.0584538
339.4	0.62976	0.199216	0.0590016
339.6	0.630963	0.199589	0.0594369
339.8	0.63136	0.199465	0.0597686
340	0.632033	0.199727	0.0599828
340.2	0.633068	0.199877	0.0606075
340.4	0.633032	0.200128	0.0609671
340.6	0.632855	0.199927	0.0603869
340.8	0.633843	0.200277	0.061205
341	0.635147	0.200932	0.0613498
341.2	0.635628	0.201491	0.061511
341.4	0.635696	0.201544	0.0612481
341.6	0.636198	0.20195	0.0614938
341.8	0.636406	0.201508	0.0611597
342	0.636768	0.202085	0.0613565
342.2	0.636648	0.201756	0.0609263
342.4	0.636758	0.201608	0.0603893
342.6	0.637174	0.201098	0.0602434
342.8	0.63691	0.20024	0.0600303
343	0.636873	0.199848	0.0595444
343.2	0.637502	0.200159	0.0599883
343.4	0.637687	0.200101	0.0602961
343.6	0.637989	0.200465	0.0604685
343.8	0.638693	0.201081	0.0610553
344	0.638777	0.201558	0.0610823
344.2	0.639175	0.202154	0.0613385
344.4	0.63954	0.202495	0.0615372
344.6	0.64033	0.20263	0.0613319
344.8	0.641623	0.203243	0.0619669
345	0.642322	0.203875	0.0616843
345.2	0.642627	0.203933	0.0614068
345.4	0.642629	0.203678	0.0606951
345.6	0.642902	0.203841	0.0604931
345.8	0.643249	0.204009	0.0599997
346	0.644052	0.204955	0.0603584
346.2	0.644858	0.205092	0.0601784
346.4	0.64565	0.205266	0.0602851
346.6	0.646047	0.205392	0.0605765
346.8	0.645917	0.20525	0.0602406
347	0.646056	0.205409	0.0598878
347.2	0.646055	0.20495	0.0603856
347.4	0.646298	0.204647	0.060599
347.6	0.646397	0.204648	0.060776
347.8	0.647146	0.205357	0.0613465
348	0.647368	0.205411	0.0612328
348.2	0.647726	0.205623	0.0615313
348.4	0.647848	0.205377	0.0615557
348.6	0.647829	0.20519	0.0612074
348.8	0.648251	0.204844	0.0611252
349	0.648425	0.205017	0.060902
349.2	0.648441	0.20483	0.0602851
349.4	0.648326	0.204824	0.0598812
349.6	0.648772	0.205568	0.0601696
349.8	0.649749	0.206127	0.0606181
350	0.650797	0.206968	0.0615868
350.2	0.651367	0.207741	0.0615658
350.4	0.651087	0.207845	0.0612935
350.6	0.651091	0.208179	0.0613618
350.8	0.650974	0.208029	0.0611155
351	0.651242	0.208044	0.0611136
351.2	0.651989	0.208119	0.0615762
351.4	0.653323	0.208989	0.0622318
351.6	0.65325	0.209233	0.0623601
351.8	0.653939	0.209475	0.0626949
352	0.654448	0.209237	0.0627643
352.2	0.654143	0.20895	0.0626501
352.4	0.654181	0.208663	0.0624452
352.6	0.654315	0.208501	0.0621127
352.8	0.65464	0.208324	0.0617385
353	0.654459	0.20822	0.0614022
353.2	0.655091	0.208197	0.061396
353.4	0.655881	0.208344	0.0614614
353.6	0.656779	0.208658	0.0623433
353.8	0.658036	0.208694	0.0629077
354	0.658572	0.209189	0.0634096
354.2	0.65899	0.209977	0.0632647
354.4	0.658965	0.209754	0.0628618
354.6	0.659904	0.210557	0.0635258
354.8	0.660151	0.210728	0.0634689
355	0.660575	0.211293	0.0638655
355.2	0.660697	0.211639	0.0638702
355.4	0.660712	0.212045	0.0643248
355.6	0.660298	0.211782	0.063993
355.8	0.660654	0.211908	0.0642696
356	0.660619	0.212199	0.0641219
356.2	0.660205	0.212334	0.0636773
356.4	0.660141	0.212484	0.0637404
356.6	0.660347	0.212692	0.0636257
356.8	0.660531	0.21284	0.0634796
357	0.66106	0.213494	0.063392
357.2	0.661914	0.213706	0.063973
357.4	0.662462	0.213683	0.0641965
357.6	0.663422	0.214171	0.0648857
357.8	0.664057	0.213839	0.0648046
358	0.664794	0.213994	0.0646575
358.2	0.66535	0.213652	0.0644878
358.4	0.665565	0.213447	0.0648207
358.6	0.666532	0.213805	0.0648349
358.8	0.666824	0.213444	0.0648412
359	0.666407	0.213134	0.0645628
359.2	0.666476	0.212899	0.0640474
359.4	0.667038	0.213209	0.0638808
359.6	0.667673	0.213235	0.0640836
359.8	0.668207	0.213747	0.0644802
360	0.668396	0.213939	0.0646233
360.2	0.66853	0.214242	0.0646036
360.4	0.668909	0.214187	0.0647329
360.6	0.669287	0.214608	0.0647372
360.8	0.669013	0.214804	0.0644082
361	0.669292	0.215416	0.0648342
361.2	0.668995	0.21533	0.0652662
361.4	0.669164	0.215272	0.0653171
361.6	0.669811	0.215609	0.0654378
361.8	0.670199	0.215505	0.0658551
362	0.670604	0.215738	0.0659034
362.2	0.670886	0.215659	0.0668546
362.4	0.671075	0.216279	0.0670092
362.6	0.671554	0.216462	0.0668137
362.8	0.671821	0.216246	0.0673867
363	0.671873	0.216369	0.0671007
363.2	0.672721	0.216835	0.0674302
363.4	0.673191	0.217602	0.0677463
363.6	0.673851	0.21844	0.068714
363.8	0.674797	0.219279	0.068602
364	0.675252	0.220056	0.0686915
364.2	0.675837	0.220455	0.0683488
364.4	0.676197	0.22026	0.0681833
364.6	0.676257	0.220316	0.0680344
364.8	0.676526	0.220574	0.0678394
365	0.677578	0.221292	0.0681534
365.2	0.677876	0.22116	0.0679093
365.4	0.678428	0.221562	0.0675644
365.6	0.678534	0.221664	0.0677301
365.8	0.678458	0.22161	0.067807
366	0.67855	0.221204	0.0672987
366.2	0.679191	0.221181	0.0674422
366.4	0.678787	0.220434	0.0665975
366.6	0.679197	0.220077	0.066885
366.8	0.679587	0.219342	0.0670186
367	0.679652	0.219793	0.0671919
367.2	0.679557	0.219571	0.0672806
367.4	0.680128	0.219522	0.0675525
367.6	0.680034	0.219727	0.067525
367.8	0.680472	0.220204	0.0675747
368	0.680321	0.220048	0.0675431
368.2	0.680419	0.220046	0.0675639
368.4	0.680145	0.219818	0.0673465
368.6	0.680611	0.220024	0.0676223
368.8	0.681083	0.220752	0.0676561
369	0.681681	0.221239	0.0677603
369.2	0.682123	0.22177	0.0682324
369.4	0.682348	0.222788	0.0683123
369.6	0.683087	0.223144	0.0688283
369.8	0.683894	0.223508	0.0685611
370	0.68494	0.223731	0.0685418
370.2	0.685929	0.224096	0.0687418
370.4	0.68612	0.224032	0.0690951
370.6	0.687079	0.224797	0.0693421
370.8	0.687069	0.224499	0.0691216
371	0.687371	0.224722	0.0692413
371.2	0.687867	0.223895	0.0687009
371.4	0.687869	0.223697	0.0686201
371.6	0.687344	0.223784	0.0677813
371.8	0.687472	0.223795	0.0674435
372	0.687777	0.223354	0.0672596
372.2	0.687824	0.223481	0.0673773
372.4	0.687431	0.222993	0.0665354
372.6	0.687944	0.223098	0.066718
372.8	0.688047	0.223208	0.0666966
373	0.688387	0.223052	0.0669266
373.2	0.688508	0.223213	0.0671157
373.4	0.688895	0.223989	0.0675048
373.6	0.689715	0.224236	0.0681529
373.8	0.690112	0.224145	0.0683026
374	0.690388	0.224562	0.069052
374.2	0.69102	0.225019	0.0693465
374.4	0.690851	0.22574	0.0695085
374.6	0.691327	0.226445	0.0694359
374.8	0.691453	0.226495	0.0693948
375	0.692049	0.227088	0.0701187
375.2	0.692698	0.227492	0.0702298
375.4	0.692662	0.228091	0.0705056
375.6	0.692935	0.228144	0.0697984
375.8	0.693462	0.22846	0.06984
376	0.69417	0.228699	0.0704757
376.2	0.694318	0.228687	0.0702436
376.4	0.694085	0.228012	0.0695807
376.6	0.694948	0.22811	0.0699706
376.8	0.695145	0.227952	0.0701933
377	0.695095	0.227603	0.069671
377.2	0.695083	0.228006	0.0697184
377.4	0.695316	0.227734	0.0697197
377.6	0.695231	0.227109	0.0698117
377.8	0.695173	0.226944	0.0695843
378	0.694903	0.227075	0.0695269
378.2	0.695287	0.227533	0.0693895
378.4	0.695162	0.227557	0.0696985
378.6	0.695656	0.227915	0.0702548
378.8	0.695987	0.228096	0.070915
379	0.696217	0.228692	0.0712449
379.2	0.696673	0.228659	0.0710867
379.4	0.696555	0.228624	0.0709182
379.6	0.696701	0.228569	0.07052
379.8	0.697008	0.228933	0.0705813
380	0.697386	0.228847	0.0707343
380.2	0.698002	0.229287	0.0705174
380.4	0.697969	0.228692	0.0699204
380.6	0.69882	0.229154	0.0697854
380.8	0.698715	0.229502	0.0693473
381	0.698448	0.229091	0.0686877
381.2	0.698457	0.228721	0.0685898
381.4	0.698367	0.228655	0.0681374
381.6	0.698339	0.228725	0.0681769
381.8	0.698308	0.22868	0.0676728
382	0.69815	0.228924	0.0678827
382.2	0.698704	0.229151	0.0681851
382.4	0.699097	0.22926	0.0685747
382.6	0.69869	0.229417	0.068797
382.8	0.698681	0.229379	0.0687482
383	0.699103	0.229624	0.0687933
383.2	0.699751	0.229597	0.069333
383.4	0.700016	0.229629	0.0693604
383.6	0.700781	0.229872	0.069416
383.8	0.701271	0.229976	0.0694338
384	0.702042	0.23023	0.0698023
384.2	0.702393	0.230606	0.0698584
384.4	0.702637	0.230028	0.0697229
384.6	0.702625	0.229994	0.0696222
384.8	0.702809	0.230143	0.0696935
385	0.703164	0.229885	0.070336
385.2	0.703255	0.229938	0.07061
385.4	0.703057	0.230398	0.0707218
385.6	0.703106	0.230075	0.0705402
385.8	0.703335	0.230269	0.0706949
386	0.703231	0.230678	0.0710836
386.2	0.70352	0.231134	0.0711036
386.4	0.703624	0.231518	0.0712367
386.6	0.703446	0.231624	0.0712192
386.8	0.704755	0.232251	0.0717028
387	0.705599	0.232718	0.0720457
387.2	0.705576	0.232916	0.0717369
387.4	0.705227	0.232533	0.0711438
387.6	0.705389	0.232508	0.0710739
387.8	0.705375	0.232408	0.0711182
388	0.70557	0.232325	0.0708865
388.2	0.705359	0.231499	0.0704897
388.4	0.70557	0.231205	0.0702704
388.6	0.705599	0.231102	0.0705003
388.8	0.705947	0.2312	0.07068
389	0.70563	0.231031	0.070905
389.2	0.705659	0.23104	0.0710533
389.4	0.705664	0.231203	0.0710955
389.6	0.705754	0.231423	0.07112
389.8	0.70638	0.232057	0.0716696
390	0.706338	0.233091	0.0716813
390.2	0.706748	0.233623	0.0721813
390.4	0.707675	0.233719	0.0723268
390.6	0.70904	0.234821	0.0727933
390.8	0.709926	0.235295	0.0731384
391	0.70993	0.235722	0.0729084
391.2	0.709855	0.236039	0.0729307
391.4	0.709928	0.236019	0.0729573
391.6	0.710689	0.236683	0.0731409
391.8	0.71121	0.236669	0.072689
392	0.711395	0.236384	0.0721019
392.2	0.711927	0.236113	0.0721732
392.4	0.712711	0.236557	0.0724238
392.6	0.712759	0.236601	0.0723585
392.8	0.712892	0.236622	0.0718455
393	0.71268	0.236365	0.0720338
393.2	0.712533	0.235916	0.0720075
393.4	0.712127	0.23586	0.0721487
393.6	0.712087	0.236007	0.0720368
393.8	0.712001	0.235814	0.072228
394	0.711997	0.236475	0.072255
394.2	0.712271	0.235473	0.0723937
394.4	0.713151	0.235515	0.0723626
394.6	0.713805	0.236122	0.0727611
394.8	0.713931	0.236021	0.0727418
395	0.71412	0.235958	0.0725346
395.2	0.714311	0.236032	0.0730969
395.4	0.71422	0.236025	0.0733709
395.6	0.714571	0.236199	0.0732935
395.8	0.714868	0.235859	0.0730448
396	0.715205	0.235862	0.0731345
396.2	0.715657	0.235846	0.0729354
396.4	0.715454	0.236128	0.0727448
396.6	0.715271	0.236324	0.0719386
396.8	0.715562	0.236802	0.0719282
397	0.715305	0.236674	0.0721092
397.2	0.715451	0.236958	0.0723049
397.4	0.7151	0.237322	0.0724215
397.6	0.715182	0.237611	0.0723824
397.8	0.715399	0.2378	0.0729032
398	0.716029	0.238716	0.0729678
398.2	0.716427	0.238016	0.0729341
398.4	0.716964	0.238808	0.0732717
398.6	0.717632	0.239209	0.0738731
398.8	0.717755	0.23907	0.0737058
399	0.71782	0.23936	0.0740786
399.2	0.717969	0.239404	0.0745899
399.4	0.71801	0.239368	0.074483
399.6	0.718367	0.239301	0.0744108
399.8	0.718436	0.238981	0.0741556
400	0.718861	0.239319	0.0742316
400.2	0.718906	0.239268	0.0736437
400.4	0.719101	0.239211	0.0734704
400.6	0.719758	0.239177	0.0730708
400.8	0.719921	0.239224	0.0730263
401	0.719893	0.238971	0.0730921
401.2	0.720393	0.238817	0.0730198
401.4	0.719864	0.23851	0.0726865
401.6	0.720388	0.239168	0.0729526
401.8	0.720479	0.239305	0.0730797
402	0.720649	0.239778	0.0730285
402.2	0.720897	0.23979	0.0731217
402.4	0.720844	0.240507	0.073445
402.6	0.720977	0.240666	0.0737766
402.8	0.720737	0.240744	0.0736012
403	0.721232	0.241285	0.0740253
403.2	0.721449	0.241373	0.0740306
403.4	0.721749	0.241524	0.0738531
403.6	0.721921	0.241288	0.0742763
403.8	0.721845	0.240999	0.0742613
404	0.721882	0.241461	0.074034
404.2	0.721963	0.241165	0.0736667
404.4	0.722122	0.240954	0.0735642
404.6	0.722664	0.241133	0.0735698
404.8	0.72273	0.241426	0.0734209
405	0.723278	0.241804	0.0741479
405.2	0.723928	0.241731	0.0740748
405.4	0.724024	0.241888	0.074529
405.6	0.724209	0.242441	0.075109
405.8	0.724431	0.242547	0.0753073
406	0.724383	0.242187	0.0753907
406.2	0.723888	0.241384	0.0752643
406.4	0.724059	0.241877	0.0761894
406.6	0.724059	0.241797	0.0766655
406.8	0.724349	0.241601	0.0768244
407	0.724257	0.241114	0.0763512
407.2	0.723837	0.240889	0.0761763
407.4	0.723902	0.240541	0.075645
407.6	0.723622	0.240071	0.0753737
407.8	0.723225	0.240265	0.0747759
408	0.723523	0.240897	0.0744451
408.2	0.724236	0.24128	0.0746757
408.4	0.725298	0.242241	0.0749193
408.6	0.726335	0.242916	0.075146
408.8	0.727015	0.243661	0.0753807
409	0.727481	0.243509	0.0749339
409.2	0.727701	0.243423	0.0748512
409.4	0.728159	0.243702	0.0755523
409.6	0.728653	0.24383	0.0759857
409.8	0.729035	0.243662	0.0758971
410	0.728595	0.242996	0.0757951
410.2	0.728882	0.243504	0.0763661
410.4	0.728973	0.244511	0.0771682
410.6	0.72856	0.244212	0.0765212
410.8	0.728548	0.24376	0.0757593
411	0.727816	0.243034	0.0750866
411.2	0.728303	0.243263	0.0756947
411.4	0.728596	0.243517	0.0754454
411.6	0.728815	0.244121	0.0757595
411.8	0.728732	0.244125	0.0755935
412	0.729396	0.244315	0.0752035
412.2	0.729965	0.244571	0.074853
412.4	0.730811	0.245414	0.0753712
412.6	0.730703	0.245063	0.0750601
412.8	0.730602	0.245094	0.0749302
413	0.7307	0.244792	0.0745648
413.2	0.730685	0.245121	0.0752683
413.4	0.731204	0.244817	0.0753522
413.6	0.731152	0.244223	0.0754474
413.8	0.731335	0.244301	0.0754413
414	0.731464	0.244593	0.0752196
414.2	0.731604	0.245542	0.075331
414.4	0.731281	0.245061	0.0748029
414.6	0.731323	0.244542	0.0739383
414.8	0.7317	0.243949	0.0737984
415	0.73156	0.24365	0.0743211
415.2	0.732441	0.244221	0.0746813
415.4	0.732256	0.244983	0.0747004
415.6	0.732557	0.245029	0.0750921
415.8	0.732272	0.244395	0.0743116
416	0.732287	0.244744	0.0741133
416.2	0.732392	0.245232	0.0747114
416.4	0.731921	0.244973	0.0748404
416.6	0.731827	0.244461	0.0748741
416.8	0.731883	0.244628	0.074903
417	0.732224	0.244912	0.075401
417.2	0.731992	0.244965	0.0754623
417.4	0.732753	0.24508	0.0757041
417.6	0.732807	0.245467	0.0758346
417.8	0.733383	0.24588	0.0752293
418	0.733753	0.246654	0.0752061
418.2	0.733992	0.246893	0.0749695
418.4	0.734209	0.246453	0.0750999
418.6	0.734499	0.2469	0.0753353
418.8	0.734681	0.247188	0.0756258
419	0.734724	0.247901	0.0756056
419.2	0.734922	0.24861	0.0754657
419.4	0.734552	0.248822	0.0757207
419.6	0.734163	0.247793	0.0753199
419.8	0.7337	0.247688	0.0750119
420	0.733948	0.247628	0.0752455
420.2	0.733876	0.24713	0.0749294
420.4	0.734406	0.246667	0.0750186
420.6	0.735147	0.246547	0.075329
420.8	0.735367	0.246464	0.0754568
421	0.735878	0.24675	0.0762246
421.2	0.736526	0.246712	0.0762386
421.4	0.73725	0.246704	0.0760283
421.6	0.737391	0.246868	0.0758149
421.8	0.737691	0.246393	0.0755827
422	0.737862	0.246586	0.0756534
422.2	0.737693	0.246371	0.0753833
422.4	0.737684	0.246727	0.0756954
422.6	0.737797	0.246981	0.0755542
422.8	0.73761	0.247154	0.0751157
423	0.737536	0.247281	0.0752728
423.2	0.737274	0.247722	0.0753826
423.4	0.736601	0.247543	0.075583
423.6	0.736296	0.247271	0.0754726
423.8	0.736671	0.247676	0.0756468
424	0.737171	0.247924	0.0758708
424.2	0.737145	0.24837	0.0762601
424.4	0.737616	0.248664	0.0771278
424.6	0.737684	0.24881	0.0774284
424.8	0.738186	0.249358	0.0783934
425	0.738485	0.249622	0.0785702
425.2	0.739257	0.249825	0.0788803
425.4	0.739699	0.249799	0.0785706
425.6	0.739805	0.249867	0.0787008
425.8	0.739742	0.249932	0.0781632
426	0.739773	0.250316	0.0777616
426.2	0.740241	0.250452	0.0779733
426.4	0.7411	0.250699	0.078122
426.6	0.741658	0.250657	0.0784854
426.8	0.741795	0.250579	0.0784523
427	0.742151	0.250788	0.0784608
427.2	0.742267	0.251042	0.0779362
427.4	0.742322	0.251282	0.0785707
427.6	0.742268	0.250836	0.0777858
427.8	0.742229	0.250372	0.0774003
428	0.742069	0.250472	0.0774702
428.2	0.741661	0.250486	0.077519
428.4	0.741563	0.250176	0.0776071
428.6	0.741728	0.250073	0.0773533
428.8	0.74216	0.25001	0.0773594
429	0.742145	0.249437	0.0773372
429.2	0.742672	0.249662	0.0777897
429.4	0.742356	0.249157	0.0778227
429.6	0.742075	0.249677	0.0781441
429.8	0.742104	0.24987	0.0777172
430	0.742506	0.250044	0.0780893
430.2	0.743265	0.250448	0.0784269
430.4	0.743878	0.250658	0.0784023
430.6	0.744344	0.250821	0.0783753
430.8	0.744588	0.251435	0.078245
431	0.744589	0.251444	0.0780526
431.2	0.74462	0.251821	0.0778045
431.4	0.744552	0.252797	0.0781244
431.6	0.743929	0.252461	0.0771681
431.8	0.743842	0.252808	0.0770158
432	0.74361	0.253251	0.0768371
432.2	0.74355	0.253363	0.0769663
432.4	0.743907	0.252969	0.0773278
432.6	0.743843	0.253062	0.077207
432.8	0.744481	0.252739	0.0778784
433	0.744657	0.252696	0.0786606
433.2	0.744855	0.252697	0.0788777
433.4	0.744796	0.252565	0.0793007
433.6	0.745604	0.253021	0.0798139
433.8	0.74602	0.252941	0.0792819
434	0.746657	0.253277	0.0794929
434.2	0.747329	0.253635	0.079591
434.4	0.747349	0.253242	0.0794712
434.6	0.747929	0.253608	0.0798116
434.8	0.748048	0.253859	0.0796382
435	0.747251	0.253336	0.0790377
435.2	0.746465	0.253209	0.0783617
435.4	0.746134	0.253261	0.0782064
435.6	0.746009	0.253064	0.0773505
435.8	0.746157	0.253678	0.0776618
436	0.745948	0.253342	0.0773677
436.2	0.745888	0.25324	0.0776796
436.4	0.745705	0.253097	0.0777537
436.6	0.745406	0.252691	0.0776605
436.8	0.745563	0.252414	0.0778212
437	0.745826	0.252731	0.0783887
437.2	0.74643	0.252536	0.0788838
437.4	0.746739	0.253079	0.0793325
437.6	0.747521	0.253529	0.0797076
437.8	0.747998	0.254252	0.0800567
438	0.74834	0.254255	0.0804304
438.2	0.748487	0.254247	0.0808422
438.4	0.748135	0.253736	0.0806042
438.6	0.748811	0.254455	0.0807571
438.8	0.747841	0.253778	0.0796448
439	0.746984	0.253272	0.0789051
439.2	0.746661	0.252664	0.0782476
439.4	0.747114	0.253051	0.0780991
439.6	0.747388	0.25335	0.0776683
439.8	0.747165	0.253478	0.0776777
440	0.746928	0.253052	0.0771674
440.2	0.747003	0.253428	0.0775691
440.4	0.747097	0.253623	0.0777607
440.6	0.74722	0.253265	0.0776044
440.8	0.747593	0.253859	0.0778935
441	0.748422	0.253608	0.078358
441.2	0.748835	0.253375	0.0787821
441.4	0.749175	0.253527	0.0788309
441.6	0.749923	0.253643	0.0794764
441.8	0.750264	0.253638	0.079973
442	0.750239	0.253386	0.0799576
442.2	0.75008	0.253247	0.0800293
442.4	0.750196	0.25317	0.0798381
442.6	0.750681	0.253373	0.0799072
442.8	0.75018	0.253392	0.079162
443	0.750567	0.253476	0.079322
443.2	0.750642	0.253831	0.0795334
443.4	0.750851	0.254116	0.0798146
443.6	0.751048	0.254988	0.0796347
443.8	0.751278	0.255819	0.0801351
444	0.75184	0.256609	0.0806146
444.2	0.752582	0.257915	0.0809919
444.4	0.752933	0.258218	0.0810756
444.6	0.753071	0.258048	0.0805325
444.8	0.753708	0.258321	0.0807334
445	0.753706	0.258086	0.080463
445.2	0.753759	0.257718	0.0804819
445.4	0.75367	0.257591	0.0802117
445.6	0.753431	0.257417	0.0801276
445.8	0.753115	0.257172	0.0799381
446	0.752925	0.256917	0.0800328
446.2	0.752707	0.256469	0.0798302
446.4	0.752715	0.255963	0.0797654
446.6	0.752466	0.25559	0.0797309
446.8	0.752241	0.255596	0.0798338
447	0.752206	0.255059	0.080199
447.2	0.752223	0.255155	0.0804162
447.4	0.752403	0.25512	0.0807161
447.6	0.752403	0.25512	0.0807161
447.8	0.751336	0.25486	0.0807763
448	0.749707	0.253636	0.0803123
448.2	0.748115	0.252999	0.0798064
448.4	0.746366	0.251862	0.0796468
448.6	0.744274	0.250555	0.079415
448.8	0.741932	0.249629	0.078783
449	0.739664	0.248834	0.0784348
449.2	0.737525	0.248474	0.0781022
449.4	0.734922	0.247551	0.0773454
449.6	0.732261	0.247025	0.0767385
449.8	0.729995	0.246455	0.0759334
450	0.727848	0.245502	0.0760819
450.2	0.725686	0.244814	0.0759873
450.4	0.723862	0.244163	0.0755252
450.6	0.721518	0.243485	0.0760534
450.8	0.7194	0.242599	0.0759906
451	0.717339	0.241807	0.0756357
451.2	0.715408	0.241297	0.0760205
451.4	0.714153	0.240681	0.0758469
451.6	0.712286	0.240653	0.0760877
451.8	0.710468	0.240074	0.0759319
452	0.708477	0.239356	0.0753888
452.2	0.706725	0.239012	0.0752197
452.4	0.705197	0.238037	0.0755846
452.6	0.703349	0.237273	0.0754707
452.8	0.701655	0.237077	0.0753754
453	0.699683	0.236377	0.0750161
453.2	0.697525	0.235782	0.0747066
453.4	0.695218	0.234875	0.0740788
453.6	0.693256	0.233919	0.0742069
453.8	0.69191	0.233164	0.0739434
454	0.689801	0.232255	0.0738395
454.2	0.687672	0.231553	0.0736408
454.4	0.685975	0.230461	0.0731791
454.6	0.68411	0.229737	0.0732949
454.8	0.682266	0.229049	0.0727671
455	0.68008	0.228228	0.0721907
455.2	0.678553	0.227572	0.0722188
455.4	0.676868	0.227039	0.0715436
455.6	0.67463	0.226222	0.0710675
455.8	0.673313	0.225419	0.0702815
456	0.670971	0.224654	0.0694036
456.2	0.668979	0.223606	0.0688508
456.4	0.667651	0.222662	0.0688876
456.6	0.665691	0.221977	0.0687325
456.8	0.663763	0.221466	0.0683399
457	0.661921	0.220458	0.067766
457.2	0.66029	0.220422	0.0677704
457.4	0.659065	0.2204	0.0678274
457.6	0.657674	0.219865	0.0684293
457.8	0.656123	0.219729	0.0682351
458	0.653995	0.219463	0.0682929
458.2	0.65172	0.218728	0.0679547
458.4	0.650046	0.218387	0.0678539
458.6	0.648792	0.21827	0.0682794
458.8	0.646956	0.21823	0.0680115
459	0.645614	0.218451	0.0684507
459.2	0.644227	0.21817	0.0682973
459.4	0.643028	0.217875	0.0682073
459.6	0.641417	0.217445	0.0677735
459.8	0.639983	0.216894	0.0671381
460	0.638342	0.215709	0.0670028
460.2	0.637648	0.215688	0.0671176
460.4	0.636782	0.215207	0.0670457
460.6	0.635733	0.214932	0.0666784
460.8	0.634436	0.214102	0.0664631
461	0.633222	0.213138	0.0664621
461.2	0.631925	0.2127	0.0663695
461.4	0.630619	0.211885	0.0664573
461.6	0.629164	0.211302	0.0668742
461.8	0.627912	0.210567	0.0667619
462	0.626085	0.209796	0.0662926
462.2	0.624407	0.208793	0.0656264
462.4	0.623143	0.208687	0.0658633
462.6	0.621924	0.208457	0.0656223
462.8	0.620256	0.208186	0.0651903
463	0.618789	0.207666	0.0650152
463.2	0.617415	0.207304	0.0648196
463.4	0.616018	0.2069	0.0649483
463.6	0.614447	0.206588	0.0649543
463.8	0.613064	0.206314	0.0651734
464	0.611605	0.205572	0.0654109
464.2	0.610423	0.205792	0.0656022
464.4	0.608692	0.205103	0.064971
464.6	0.607278	0.204466	0.0649707
464.8	0.605175	0.203921	0.0653551
465	0.603512	0.203353	0.0651078
465.2	0.602365	0.203043	0.0648021
465.4	0.601087	0.202852	0.0648878
465.6	0.60002	0.202909	0.064916
465.8	0.598935	0.202125	0.0645747
466	0.597481	0.201861	0.0637933
466.2	0.596736	0.202115	0.063609
466.4	0.595345	0.201978	0.0632303
466.6	0.59433	0.201704	0.0628047
466.8	0.593248	0.201464	0.0628471
467	0.592048	0.200836	0.062665
467.2	0.590458	0.200299	0.0624397
467.4	0.588985	0.199844	0.0623907
467.6	0.587858	0.199342	0.062337
467.8	0.586588	0.198853	0.0623439
468	0.584688	0.19769	0.0620167
468.2	0.583609	0.196995	0.0613654
468.4	0.582242	0.196566	0.0607953
468.6	0.580833	0.195551	0.0606962
468.8	0.57949	0.195068	0.0607924
469	0.578382	0.19444	0.0607501
469.2	0.577181	0.193952	0.0603593
469.4	0.576041	0.193683	0.0606322
469.6	0.574584	0.193103	0.0603694
469.8	0.572998	0.192552	0.0602108
470	0.571643	0.192332	0.0596498
470.2	0.570118	0.191701	0.0593238
470.4	0.568925	0.191258	0.0590884
470.6	0.567946	0.1913	0.0596055
470.8	0.566308	0.19057	0.0589815
471	0.564543	0.189408	0.0587546
471.2	0.563158	0.189267	0.058299
471.4	0.562503	0.189245	0.0586727
471.6	0.561771	0.188846	0.0589908
471.8	0.561206	0.188789	0.0594641
472	0.559848	0.18839	0.0590112
472.2	0.55935	0.188245	0.0589899
472.4	0.558717	0.189077	0.0596249
472.6	0.557223	0.188368	0.0596882
472.8	0.556419	0.188903	0.0599861
473	0.555215	0.188852	0.0598296
473.2	0.554262	0.189098	0.059841
473.4	0.552907	0.189052	0.0603286
473.6	0.55152	0.188571	0.0599048
473.8	0.550088	0.18817	0.0594034
474	0.548817	0.187068	0.0589139
474.2	0.547534	0.186095	0.0583498
474.4	0.546386	0.185663	0.0577105
474.6	0.54528	0.184955	0.0576994
474.8	0.543673	0.183568	0.0568997
475	0.542294	0.183009	0.0570265
475.2	0.54143	0.182448	0.0568246
475.4	0.540339	0.181782	0.0572159
475.6	0.539646	0.181138	0.0576934
475.8	0.538408	0.18059	0.0577526
476	0.536509	0.180173	0.0574016
476.2	0.53561	0.180366	0.0577627
476.4	0.534296	0.180278	0.0576151
476.6	0.532621	0.179902	0.0576275
476.8	0.532054	0.180277	0.0575835
477	0.531099	0.180076	0.0573228
477.2	0.530089	0.180137	0.0579927
477.4	0.528985	0.180005	0.0576546
477.6	0.528457	0.180044	0.0574793
477.8	0.527501	0.179845	0.0571381
478	0.526618	0.179022	0.0565537
478.2	0.526095	0.179003	0.0566488
478.4	0.525135	0.178313	0.0558239
478.6	0.524527	0.178462	0.0563076
478.8	0.52353	0.178118	0.0561468
479	0.522284	0.177911	0.0558985
479.2	0.521284	0.177167	0.0555224
479.4	0.52052	0.176766	0.0558359
479.6	0.519579	0.176052	0.0556883
479.8	0.51818	0.175416	0.0556628
480	0.516432	0.174936	0.0550667
480.2	0.515574	0.174594	0.0553833
480.4	0.513854	0.173715	0.0548373
480.6	0.513054	0.174081	0.0550242
480.8	0.51191	0.174015	0.0546029
481	0.510953	0.173523	0.0543891
481.2	0.510073	0.173422	0.0547039
481.4	0.509299	0.173809	0.0545503
481.6	0.508506	0.173491	0.054575
481.8	0.507419	0.173132	0.0540961
482	0.506637	0.173104	0.0543684
482.2	0.505841	0.172872	0.0545463
482.4	0.504533	0.172081	0.0537952
482.6	0.503516	0.172258	0.0542932
482.8	0.502343	0.171232	0.0536518
483	0.50105	0.170945	0.0531976
483.2	0.500115	0.17001	0.0527881
483.4	0.49913	0.169284	0.0527737
483.6	0.497038	0.16818	0.0521289
483.8	0.495587	0.167205	0.0516537
484	0.49372	0.166787	0.0512272
484.2	0.493161	0.16636	0.051374
484.4	0.492093	0.166028	0.0512652
484.6	0.491525	0.166104	0.0514919
484.8	0.49068	0.165703	0.0514482
485	0.490173	0.165649	0.0515292
485.2	0.489189	0.165422	0.0514846
485.4	0.488406	0.165543	0.0512085
485.6	0.487291	0.165001	0.0506555
485.8	0.48662	0.165283	0.0506739
486	0.486415	0.165462	0.0510579
486.2	0.485705	0.164705	0.0509957
486.4	0.485129	0.164529	0.0507713
486.6	0.484368	0.164073	0.0510456
486.8	0.483116	0.163403	0.050576
487	0.481716	0.162963	0.0503692
487.2	0.48088	0.16247	0.0503714
487.4	0.479749	0.162218	0.0503405
487.6	0.477873	0.161565	0.0497252
487.8	0.476846	0.161181	0.0497166
488	0.476067	0.160757	0.0502151
488.2	0.475379	0.160244	0.0503024
488.4	0.474228	0.159967	0.0511735
488.6	0.472971	0.159534	0.0508941
488.8	0.471591	0.159105	0.0512027
489	0.470554	0.159245	0.0509334
489.2	0.469321	0.15867	0.0505765
489.4	0.469	0.159014	0.050293
489.6	0.467908	0.158737	0.0501036
489.8	0.467816	0.159339	0.0504396
490	0.467251	0.159137	0.0503209
490.2	0.46628	0.158868	0.0501568
490.4	0.466027	0.158814	0.0498147
490.6	0.465111	0.158181	0.0498789
490.8	0.463985	0.157976	0.0496104
491	0.463265	0.15784	0.0492911
491.2	0.463308	0.158512	0.0490859
491.4	0.462293	0.158344	0.0487361
491.6	0.461184	0.157893	0.0481649
491.8	0.460798	0.157361	0.0481269
492	0.460469	0.157155	0.0481304
492.2	0.459393	0.156709	0.0479013
492.4	0.458371	0.156536	0.0479351
492.6	0.4572	0.155766	0.0472549
492.8	0.456288	0.154985	0.0474424
493	0.455685	0.155062	0.0470367
493.2	0.454899	0.154586	0.0471157
493.4	0.454083	0.154307	0.0472482
493.6	0.452743	0.153696	0.0470602
493.8	0.451662	0.153589	0.0473594
494	0.450208	0.152684	0.0469602
494.2	0.448885	0.152001	0.046984
494.4	0.447935	0.151376	0.0473539
494.6	0.446377	0.150585	0.0473693
494.8	0.445263	0.150488	0.0477989
495	0.444219	0.15018	0.0471459
495.2	0.443391	0.14949	0.0467054
495.4	0.442768	0.149605	0.0468611
495.6	0.442461	0.149386	0.0469222
495.8	0.442053	0.149087	0.0466292
496	0.440856	0.148745	0.0460046
496.2	0.439905	0.148021	0.0456396
496.4	0.439158	0.1477	0.0450382
496.6	0.438737	0.146923	0.0448153
496.8	0.438092	0.146833	0.0447404
497	0.437422	0.147255	0.0448471
497.2	0.436535	0.146361	0.0445367
497.4	0.435853	0.146382	0.0445377
497.6	0.435094	0.146415	0.0442809
497.8	0.434192	0.146537	0.0447647
498	0.433067	0.146212	0.0446008
498.2	0.432054	0.146122	0.0450795
498.4	0.431231	0.146131	0.0451617
498.6	0.430675	0.146174	0.0452951
498.8	0.43008	0.145955	0.04524
499	0.429598	0.145626	0.0447299
499.2	0.429386	0.145471	0.0448225
499.4	0.429551	0.145835	0.0450272
499.6	0.429122	0.145351	0.0451071
499.8	0.428286	0.144531	0.0442774
500	0.427225	0.143508	0.0434122
500.2	0.42696	0.143115	0.0434885
500.4	0.426409	0.142666	0.0430928
500.6	0.425553	0.142282	0.0429211
500.8	0.424674	0.142254	0.0431541
501	0.424319	0.14203	0.0433374
501.2	0.423325	0.141005	0.0427788
501.4	0.42252	0.141366	0.0428667
501.6	0.420951	0.140726	0.0425157
501.8	0.419808	0.140376	0.0427555
502	0.418396	0.13977	0.0426314
502.2	0.41762	0.140062	0.043185
502.4	0.416596	0.140549	0.0433138
502.6	0.415521	0.14043	0.0433995
502.8	0.414744	0.140332	0.0432905
503	0.414219	0.140458	0.0435783
503.2	0.41383	0.140535	0.0440646
503.4	0.413887	0.140496	0.0446175
503.6	0.413325	0.140907	0.0449262
503.8	0.412642	0.140568	0.0447257
504	0.412027	0.140636	0.0443762
504.2	0.411455	0.140549	0.044267
504.4	0.410684	0.140472	0.0442699
504.6	0.409757	0.140136	0.0442608
504.8	0.409099	0.139675	0.0442673
505	0.408827	0.139457	0.0443751
505.2	0.407632	0.138436	0.0433474
505.4	0.40687	0.137732	0.0427122
505.6	0.406239	0.137089	0.0421929
505.8	0.405958	0.136855	0.041964
506	0.405483	0.137014	0.0419975
506.2	0.405013	0.137349	0.0421377
506.4	0.403623	0.137241	0.0417305
506.6	0.403406	0.136788	0.0416401
506.8	0.40292	0.136278	0.0413645
507	0.401989	0.135678	0.0409524
507.2	0.401693	0.135626	0.0416154
507.4	0.400828	0.135239	0.041343
507.6	0.399534	0.134857	0.0408943
507.8	0.398516	0.134158	0.0402207
508	0.397625	0.133495	0.0397863
508.2	0.396363	0.132583	0.0398044
508.4	0.394903	0.132181	0.0401964
508.6	0.39399	0.131353	0.0405533
508.8	0.393268	0.131183	0.040814
509	0.392799	0.131034	0.0410502
509.2	0.392085	0.130532	0.040696
509.4	0.391424	0.130102	0.0410638
509.6	0.390906	0.130376	0.0409098
509.8	0.39028	0.130236	0.0406991
510	0.38979	0.130483	0.0410946
510.2	0.389005	0.130365	0.0408631
510.4	0.388247	0.1307	0.0412269
510.6	0.387953	0.130501	0.0409922
510.8	0.386702	0.129799	0.0400683
511	0.385717	0.129948	0.0394309
511.2	0.385553	0.130172	0.0400737
511.4	0.384621	0.129973	0.0387378
511.6	0.383749	0.129922	0.0386853
511.8	0.383417	0.129835	0.0388238
512	0.38299	0.129842	0.0394028
512.2	0.382178	0.130118	0.0397786
512.4	0.381364	0.130676	0.0403252
512.6	0.381147	0.130248	0.0405812
512.8	0.380549	0.130406	0.0405723
513	0.380103	0.130167	0.0406298
513.2	0.379994	0.130323	0.0416402
513.4	0.379368	0.129845	0.0417923
513.6	0.37946	0.12967	0.0418153
513.8	0.379327	0.129414	0.0419442
514	0.379067	0.129136	0.042084
514.2	0.378255	0.128918	0.0416451
514.4	0.377424	0.128334	0.0416
514.6	0.376435	0.127231	0.0407533
514.8	0.375827	0.127013	0.040417
515	0.374933	0.126704	0.0400701
515.2	0.374226	0.125934	0.0396606
515.4	0.372944	0.125456	0.0382252
515.6	0.371422	0.124793	0.0380512
515.8	0.370979	0.124338	0.0380866
516	0.370147	0.124025	0.0378688
516.2	0.369245	0.124078	0.0376822
516.4	0.368529	0.123666	0.0378061
516.6	0.367841	0.123055	0.0371535
516.8	0.367278	0.123262	0.0373436
517	0.366766	0.123435	0.0377306
517.2	0.366272	0.123318	0.0379972
517.4	0.365748	0.123181	0.0377994
517.6	0.365233	0.123474	0.0375008
517.8	0.36456	0.123328	0.0366785
518	0.363675	0.123171	0.0361921
518.2	0.362883	0.123247	0.0362562
518.4	0.361971	0.12251	0.0361144
518.6	0.361456	0.122832	0.036051
518.8	0.361176	0.123127	0.0359186
519	0.360583	0.123156	0.0360349
519.2	0.360032	0.122874	0.035703
519.4	0.35921	0.122717	0.0357974
519.6	0.358628	0.12214	0.0359611
519.8	0.358688	0.121945	0.0365798
520	0.358395	0.121631	0.03652
520.2	0.358147	0.121458	0.0371629
520.4	0.357344	0.120455	0.0369692
520.6	0.356495	0.120405	0.0370735
520.8	0.356156	0.120303	0.0378966
521	0.355463	0.119949	0.0379251
521.2	0.354803	0.11999	0.0376293
521.4	0.354265	0.120208	0.0376271
521.6	0.353646	0.120071	0.0370865
521.8	0.353091	0.119536	0.0365941
522	0.353001	0.119749	0.0367304
522.2	0.352436	0.119816	0.0369335
522.4	0.351597	0.119217	0.0365323
522.6	0.351172	0.119519	0.0362781
522.8	0.351352	0.119668	0.0365369
523	0.351363	0.119753	0.0368011
523.2	0.350857	0.119499	0.036382
523.4	0.350128	0.11911	0.036189
523.6	0.349996	0.118658	0.0356339
523.8	0.34978	0.118226	0.0352507
524	0.349113	0.117831	0.034973
524.2	0.348485	0.117391	0.0348929
524.4	0.347862	0.11697	0.0348861
524.6	0.347328	0.116789	0.0352148
524.8	0.346699	0.116392	0.0353726
525	0.345869	0.116468	0.0352988
525.2	0.344892	0.116177	0.0351304
525.4	0.344338	0.115922	0.0357519
525.6	0.344005	0.115959	0.0363958
525.8	0.343217	0.115798	0.0364114
526	0.34307	0.115797	0.0365897
526.2	0.342065	0.115919	0.0366007
526.4	0.341572	0.11527	0.0364958
526.6	0.341269	0.11561	0.0367415
526.8	0.340896	0.115801	0.0372229
527	0.340472	0.115467	0.0369452
527.2	0.339465	0.115244	0.0364917
527.4	0.338021	0.114123	0.035706
527.6	0.337842	0.113762	0.0352927
527.8	0.337227	0.113599	0.0351422
528	0.336261	0.113602	0.0351317
528.2	0.335807	0.113205	0.0348659
528.4	0.335125	0.112378	0.0347759
528.6	0.334645	0.112299	0.0344464
528.8	0.334262	0.11246	0.0343864
529	0.333862	0.112714	0.0346636
529.2	0.333383	0.112342	0.0353089
529.4	0.333097	0.11273	0.0356921
529.6	0.332598	0.112909	0.0355169
529.8	0.331707	0.112778	0.0343956
530	0.331805	0.112858	0.0341709
530.2	0.331507	0.11348	0.034197
530.4	0.331244	0.11292	0.0339116
530.6	0.330821	0.112733	0.0339331
530.8	0.330141	0.112346	0.0337181
531	0.329904	0.111823	0.0331627
531.2	0.328868	0.111442	0.0326404
531.4	0.328103	0.110929	0.0323467
531.6	0.327944	0.110838	0.0326549
531.8	0.327428	0.110505	0.0328131
532	0.32717	0.110172	0.0331761
532.2	0.326551	0.10977	0.0330245
532.4	0.326215	0.109356	0.0327993
532.6	0.326061	0.109784	0.0328197
532.8	0.325125	0.108772	0.0329029
533	0.324561	0.10845	0.0335131
533.2	0.323639	0.108422	0.034002
533.4	0.322813	0.10815	0.03364
533.6	0.322135	0.108084	0.0334701
533.8	0.321263	0.1078	0.0329297
534	0.321111	0.107736	0.0333613
534.2	0.320821	0.108353	0.0334104
534.4	0.320257	0.107559	0.0332604
534.6	0.319794	0.107307	0.0330361
534.8	0.318924	0.10759	0.0330097
535	0.318279	0.10759	0.0325732
535.2	0.317348	0.107465	0.0320008
535.4	0.316785	0.10719	0.0319664
535.6	0.315496	0.106403	0.0313434
535.8	0.315193	0.106003	0.0310934
536	0.314285	0.105416	0.0309871
536.2	0.31293	0.104693	0.029937
536.4	0.312667	0.104141	0.0295274
536.6	0.3122	0.103657	0.0291511
536.8	0.311526	0.102831	0.029444
537	0.311527	0.103218	0.0294438
537.2	0.311225	0.103271	0.0294318
537.4	0.311146	0.10331	0.0292702
537.6	0.311039	0.103544	0.0292845
537.8	0.310987	0.103571	0.0295985
538	0.310679	0.104029	0.029706
538.2	0.310879	0.104454	0.0298297
538.4	0.310381	0.104024	0.029809
538.6	0.310488	0.104656	0.02976
538.8	0.310347	0.105439	0.0301516
539	0.310818	0.106173	0.0304411
539.2	0.309937	0.105605	0.0298766
539.4	0.309408	0.105499	0.0300651
539.6	0.308236	0.104793	0.0295256
539.8	0.30798	0.104602	0.0295837
540	0.30728	0.104535	0.0302927
540.2	0.307295	0.104401	0.0304579
540.4	0.306594	0.103788	0.0305869
540.6	0.306088	0.103518	0.0305452
540.8	0.305941	0.103417	0.0309038
541	0.305376	0.103207	0.0307871
541.2	0.304497	0.102653	0.0305942
541.4	0.303427	0.10205	0.0305275
541.6	0.302858	0.101279	0.0307324
541.8	0.302586	0.100921	0.0309368
542	0.302162	0.100952	0.0305806
542.2	0.302147	0.100965	0.0309227
542.4	0.301866	0.100513	0.0310955
542.6	0.302167	0.100686	0.0310326
542.8	0.301834	0.101076	0.031116
543	0.301571	0.101091	0.0307926
543.2	0.300106	0.100342	0.0298508
543.4	0.299444	0.100373	0.0299352
543.6	0.299202	0.100532	0.0299494
543.8	0.299258	0.101221	0.0304369
544	0.298802	0.101541	0.0306914
544.2	0.298283	0.101226	0.030228
544.4	0.297067	0.100607	0.0299306
544.6	0.297176	0.10137	0.0299505
544.8	0.296553	0.100782	0.0296907
545	0.295489	0.100159	0.0293155
545.2	0.294938	0.100112	0.0288347
545.4	0.29447	0.100032	0.0288646
545.6	0.294673	0.0997704	0.0287387
545.8	0.294455	0.0996247	0.0287393
546	0.294028	0.099464	0.0283394
546.2	0.293283	0.099134	0.028407
546.4	0.292706	0.0978747	0.0276266
546.6	0.292401	0.0978849	0.0273356
546.8	0.291781	0.0973706	0.0274573
547	0.291062	0.0965859	0.0272342
547.2	0.290003	0.0958247	0.0269932
547.4	0.289787	0.0959254	0.0272082
547.6	0.289905	0.0963273	0.0277404
547.8	0.289077	0.0960962	0.0280397
548	0.288256	0.095619	0.0274386
548.2	0.287498	0.0953389	0.0274104
548.4	0.286911	0.0953732	0.0274157
548.6	0.287023	0.0960575	0.0276355
548.8	0.286578	0.0952269	0.027321
549	0.286224	0.0957265	0.0278586
549.2	0.286208	0.0965218	0.0282364
549.4	0.285902	0.0964822	0.0277381
549.6	0.286031	0.0966159	0.0279053
549.8	0.285289	0.0963867	0.0279341
550	0.285209	0.0967899	0.0279737
550.2	0.285054	0.0972455	0.0282631
550.4	0.285091	0.0969953	0.0284165
550.6	0.284733	0.0972068	0.0287981
550.8	0.284208	0.096521	0.0287952
551	0.283749	0.0962349	0.0283784
551.2	0.283292	0.0964371	0.0281416
551.4	0.283442	0.0968041	0.0285942
551.6	0.2825	0.0967926	0.0289026
551.8	0.281507	0.0964285	0.0288107
552	0.281197	0.0963689	0.0282333
552.2	0.280404	0.0965508	0.0281488
552.4	0.280098	0.0961911	0.0278132
552.6	0.279978	0.0958734	0.0278189
552.8	0.279857	0.0951865	0.0276595
553	0.279676	0.0955216	0.028293
553.2	0.280302	0.0955279	0.0284128
553.4	0.280083	0.0948166	0.0279455
553.6	0.280447	0.0947457	0.028877
553.8	0.280372	0.0942929	0.0287977
554	0.280238	0.0939506	0.0295022
554.2	0.279738	0.0937958	0.0295088
554.4	0.279308	0.093329	0.0296802
554.6	0.278554	0.093258	0.0291733
554.8	0.278004	0.0929963	0.0290918
555	0.277338	0.0930443	0.028393
555.2	0.276235	0.0929375	0.0281253
555.4	0.275361	0.0924853	0.0280872
555.6	0.274281	0.0925084	0.0274342
555.8	0.273585	0.0920925	0.026628
556	0.272652	0.0916121	0.0256016
556.2	0.271882	0.0916376	0.0252501
556.4	0.271852	0.0912882	0.0254054
556.6	0.271389	0.0908898	0.0252112
556.8	0.271455	0.0905995	0.0253139
557	0.271265	0.0910788	0.0260153
557.2	0.271452	0.0905988	0.0259861
557.4	0.270798	0.0901009	0.0261153
557.6	0.270559	0.0895346	0.0263642
557.8	0.270031	0.0893833	0.026374
558	0.269445	0.0887878	0.0266143
558.2	0.269432	0.0895224	0.0268766
558.4	0.269544	0.0897026	0.0271822
558.6	0.269044	0.08981	0.0269128
558.8	0.268382	0.0899752	0.0267865
559	0.268057	0.0898418	0.0261953
559.2	0.26748	0.0895212	0.0263418
559.4	0.267723	0.0894151	0.0262726
559.6	0.267385	0.0894659	0.0257546
559.8	0.266826	0.0893227	0.0256303
560	0.265887	0.0891168	0.0253749
560.2	0.265507	0.0891902	0.0255236
560.4	0.265233	0.0890935	0.0259667
560.6	0.264229	0.0888898	0.0252744
560.8	0.264106	0.088984	0.0254274
561	0.263807	0.0892296	0.0254203
561.2	0.263252	0.0880289	0.0247013
561.4	0.262546	0.0873015	0.0246586
561.6	0.262091	0.0865825	0.0245768
561.8	0.261495	0.0864761	0.0240837
562	0.261354	0.0858778	0.0240828
562.2	0.260852	0.0861337	0.0239931
562.4	0.260249	0.0853268	0.0233043
562.6	0.259664	0.085327	0.0233116
562.8	0.258844	0.084823	0.0230613
563	0.25824	0.0843596	0.0229656
563.2	0.258424	0.0842486	0.0237634
563.4	0.258445	0.0838897	0.0235788
563.6	0.257725	0.0843532	0.0240452
563.8	0.257326	0.0845728	0.0242162
564	0.256592	0.0844555	0.0238648
564.2	0.256549	0.0846529	0.0238964
564.4	0.256332	0.0847953	0.024054
564.6	0.255972	0.085185	0.0237413
564.8	0.256335	0.0852969	0.0240615
565	0.256115	0.0849794	0.0239729
565.2	0.256212	0.084719	0.0238473
565.4	0.256567	0.0846697	0.0243875
565.6	0.256322	0.0848796	0.0242057
565.8	0.255713	0.0847102	0.0235447
566	0.256241	0.0848481	0.023959
566.2	0.256193	0.0855024	0.0238548
566.4	0.256225	0.0853022	0.0240236
566.6	0.256227	0.0858595	0.0244507
566.8	0.255704	0.0855251	0.0242849
567	0.256005	0.0861214	0.0249199
567.2	0.256567	0.0862862	0.0254165
567.4	0.255925	0.0863306	0.0250498
567.6	0.255244	0.0865093	0.0254166
567.8	0.254784	0.0862893	0.0252695
568	0.254357	0.0858976	0.0251907
568.2	0.253288	0.0855871	0.0249649
568.4	0.252528	0.0850653	0.0251467
568.6	0.251842	0.0846145	0.0250174
568.8	0.251664	0.0845393	0.0252791
569	0.250962	0.0839541	0.0247575
569.2	0.250391	0.0838725	0.0244687
569.4	0.249564	0.0831595	0.0243818
569.6	0.248635	0.0830506	0.0237887
569.8	0.248365	0.0826554	0.023813
570	0.248676	0.0831206	0.0241304
570.2	0.248644	0.0834607	0.0239692
570.4	0.248616	0.0837052	0.0243695
570.6	0.248584	0.0841191	0.0246812
570.8	0.248093	0.0840545	0.0246054
571	0.247759	0.0842414	0.0245269
571.2	0.247134	0.0840772	0.0239511
571.4	0.246392	0.0839262	0.0235674
571.6	0.245874	0.0834559	0.0235194
571.8	0.24568	0.0829594	0.0234482
572	0.245351	0.0823176	0.0231333
572.2	0.244431	0.081969	0.0228212
572.4	0.244504	0.0816607	0.0236711
572.6	0.243971	0.0809658	0.0230498
572.8	0.243616	0.0808772	0.0229566
573	0.24314	0.0800388	0.0224756
573.2	0.242566	0.0798386	0.022919
573.4	0.242822	0.0794401	0.0233047
573.6	0.242924	0.0792669	0.0234715
573.8	0.243061	0.0789943	0.0233643
574	0.243042	0.0790692	0.0236636
574.2	0.242619	0.0784944	0.0233717
574.4	0.242649	0.0784427	0.0235947
574.6	0.242823	0.0787162	0.0234487
574.8	0.242213	0.078703	0.0227649
575	0.241779	0.0791001	0.0226425
575.2	0.240986	0.078884	0.0220598
575.4	0.240379	0.0787261	0.0219071
575.6	0.240192	0.0786104	0.0217247
575.8	0.239846	0.0783284	0.0216091
576	0.239903	0.0785108	0.0213216
576.2	0.239355	0.0789758	0.021722
576.4	0.239008	0.0790113	0.0219854
576.6	0.238549	0.0786955	0.021729
576.8	0.238294	0.0787931	0.0221069
577	0.238217	0.078653	0.0227381
577.2	0.237964	0.0786366	0.0232905
577.4	0.238304	0.0783609	0.0230892
577.6	0.237766	0.0779872	0.0228345
577.8	0.237208	0.0777312	0.0223487
578	0.236761	0.077231	0.0223307
578.2	0.236007	0.0766508	0.0216978
578.4	0.235971	0.076735	0.0214519
578.6	0.235662	0.0769403	0.0216531
578.8	0.234934	0.0767	0.0214011
579	0.234339	0.0767373	0.0214828
579.2	0.233542	0.0764607	0.0208837
579.4	0.233385	0.0768758	0.0212449
579.6	0.233344	0.0766402	0.0213875
579.8	0.232992	0.0764538	0.0214125
580	0.233124	0.076864	0.0216715
580.2	0.23251	0.076927	0.0223514
580.4	0.232107	0.0765429	0.0225842
580.6	0.232335	0.0764353	0.023671
580.8	0.232358	0.076513	0.0235607
581	0.232781	0.0771372	0.0242208
581.2	0.233123	0.0772278	0.0249477
581.4	0.233278	0.077213	0.024698
581.6	0.232895	0.0772414	0.024723
581.8	0.232405	0.0768474	0.0242526
582	0.231933	0.0767277	0.0247281
582.2	0.231128	0.0763459	0.0244113
582.4	0.230339	0.0762677	0.0241854
582.6	0.229537	0.0762229	0.0238301
582.8	0.228898	0.075924	0.0231487
583	0.227872	0.0757192	0.022462
583.2	0.227027	0.0755069	0.0217084
583.4	0.226666	0.0755931	0.0220802
583.6	0.226015	0.0752339	0.0217951
583.8	0.225494	0.0752267	0.0216865
584	0.225185	0.0748823	0.0215343
584.2	0.224424	0.0742468	0.0213072
584.4	0.224305	0.0742335	0.0211705
584.6	0.224688	0.0743539	0.0216052
584.8	0.224574	0.0743741	0.0209998
585	0.224909	0.074727	0.0215658
585.2	0.225309	0.0743242	0.0219832
585.4	0.225112	0.0740754	0.0213742
585.6	0.22492	0.0741833	0.0213499
585.8	0.224942	0.0742505	0.0214961
586	0.22473	0.0746501	0.0220036
586.2	0.224792	0.074913	0.0219685
586.4	0.224555	0.0753349	0.0221946
586.6	0.22407	0.075083	0.0218387
586.8	0.224305	0.0755585	0.0223064
587	0.224373	0.076003	0.0225289
587.2	0.224287	0.0763238	0.0227171
587.4	0.224794	0.0766673	0.0236417
587.6	0.224403	0.0766062	0.0233616
587.8	0.223814	0.0760157	0.0230967
588	0.22328	0.0756598	0.0228749
588.2	0.222626	0.0753271	0.0227201
588.4	0.222054	0.0750883	0.0224125
588.6	0.221503	0.0743186	0.0223956
588.8	0.221168	0.0738215	0.021937
589	0.22129	0.0736627	0.0218221
589.2	0.220959	0.07339	0.0219751
589.4	0.220027	0.0731244	0.0210803
589.6	0.219447	0.072727	0.0206505
589.8	0.21889	0.07286	0.020484
590	0.218483	0.0722559	0.0197661
590.2	0.218502	0.0721579	0.0195737
590.4	0.217985	0.0717895	0.0188999
590.6	0.217764	0.0714891	0.0185978
590.8	0.218351	0.0720537	0.0189564
591	0.218575	0.0719652	0.0187535
591.2	0.218347	0.0715437	0.0183917
591.4	0.218479	0.0714174	0.0182175
591.6	0.217629	0.071195	0.0184789
591.8	0.2169	0.0709381	0.0182301
592	0.216864	0.0708395	0.0186332
592.2	0.216258	0.0705098	0.0184316
592.4	0.21582	0.0703743	0.0186902
592.6	0.215859	0.0703272	0.0190947
592.8	0.215809	0.0705795	0.01936
593	0.215144	0.070321	0.0194412
593.2	0.213766	0.0699573	0.0193585
593.4	0.213036	0.0697536	0.0188432
593.6	0.212631	0.0696106	0.0190266
593.8	0.212067	0.0702245	0.0188891
594	0.212273	0.0700574	0.0186918
594.2	0.212409	0.0706788	0.0191462
594.4	0.212287	0.0714053	0.0195143
594.6	0.212459	0.0717393	0.0196762
594.8	0.21292	0.0715387	0.019864
595	0.212931	0.0715954	0.0198236
595.2	0.212663	0.071169	0.019904
595.4	0.212721	0.0715154	0.0203788
595.6	0.212146	0.0715986	0.020855
595.8	0.212128	0.071683	0.020324
596	0.211801	0.0711307	0.020688
596.2	0.211016	0.070649	0.0207296
596.4	0.210936	0.0701177	0.0207988
596.6	0.210325	0.0698461	0.0204463
596.8	0.209258	0.069336	0.0200842
597	0.207986	0.0684531	0.0194279
597.2	0.207446	0.0685372	0.0193746
597.4	0.207442	0.0682899	0.0188848
597.6	0.207674	0.0684527	0.0191848
597.8	0.207343	0.0683346	0.0188403
598	0.207685	0.0677361	0.0187992
598.2	0.207051	0.0673252	0.0186109
598.4	0.206784	0.0672029	0.0187834
598.6	0.207101	0.0672736	0.0184492
598.8	0.207622	0.0669721	0.0188444
599	0.20806	0.0673987	0.0189977
599.2	0.208189	0.0679489	0.0189972
599.4	0.208792	0.0689075	0.019103
599.6	0.209244	0.0699439	0.0195555
599.8	0.209498	0.0698019	0.0196936
600	0.208873	0.0696999	0.019889
600.2	0.208554	0.0697819	0.0199632
600.4	0.208647	0.0698908	0.0198548
600.6	0.207831	0.0701156	0.0197842
600.8	0.206872	0.0698748	0.0192736
601	0.20639	0.0695536	0.019049
601.2	0.205864	0.069592	0.0188603
601.4	0.205536	0.0690608	0.0186114
601.6	0.204891	0.0688452	0.0184175
601.8	0.203774	0.0677275	0.0177677
602	0.203542	0.0675739	0.0182653
602.2	0.202653	0.0673569	0.0182112
602.4	0.202479	0.0677045	0.0186635
602.6	0.202427	0.0679638	0.0186044
602.8	0.202307	0.0676843	0.018579
603	0.202082	0.0676492	0.017943
603.2	0.202114	0.0679269	0.0179821
603.4	0.202608	0.0679705	0.0180854
603.6	0.20242	0.0678967	0.018325
603.8	0.202347	0.0672575	0.0185149
604	0.202593	0.0673208	0.0187095
604.2	0.202489	0.0668947	0.0192144
604.4	0.202606	0.0667774	0.0197228
604.6	0.201906	0.066216	0.0196365
604.8	0.201049	0.065708	0.0191637
605	0.200446	0.0652569	0.0193149
605.2	0.200069	0.0656632	0.0193854
605.4	0.200434	0.0658924	0.0201629
605.6	0.199932	0.0660815	0.02031
605.8	0.200102	0.065981	0.0207406
606	0.200394	0.0669048	0.0211703
606.2	0.1997	0.0665904	0.0205204
606.4	0.19932	0.066874	0.0206324
606.6	0.198793	0.0664648	0.0197322
606.8	0.198532	0.0664401	0.0190092
607	0.19858	0.0663812	0.0184995
607.2	0.198757	0.0666186	0.0187376
607.4	0.198757	0.0668894	0.018809
607.6	0.198636	0.0664969	0.018632
607.8	0.19913	0.0662112	0.0186594
608	0.198996	0.0655052	0.018338
608.2	0.19874	0.0650278	0.0186987
608.4	0.197989	0.0647691	0.0187236
608.6	0.197083	0.0641898	0.0183266
608.8	0.196724	0.0640023	0.0181854
609	0.196661	0.0636839	0.0182533
609.2	0.196727	0.0638138	0.018467
609.4	0.196376	0.0634687	0.0185286
609.6	0.195828	0.0637367	0.0185586
609.8	0.195845	0.0635868	0.0178514
610	0.195201	0.0636546	0.0169959
610.2	0.194849	0.0633951	0.01665
610.4	0.194799	0.0639515	0.0167891
610.6	0.194506	0.0638751	0.0164305
610.8	0.194472	0.0639525	0.0167918
611	0.194854	0.0642446	0.0174142
611.2	0.194904	0.0644181	0.0180059
611.4	0.194686	0.0638593	0.0176425
611.6	0.194116	0.0635036	0.0173123
611.8	0.194457	0.0636612	0.0180485
612	0.194076	0.0635205	0.0190633
612.2	0.193681	0.0638054	0.0196564
612.4	0.19313	0.0640489	0.0199452
612.6	0.192602	0.0638541	0.0196926
612.8	0.192608	0.0635163	0.0197846
613	0.192334	0.063446	0.0192918
613.2	0.192038	0.0636031	0.0191643
613.4	0.192297	0.0634167	0.0191762
613.6	0.192441	0.0642763	0.0192202
613.8	0.192411	0.064284	0.0184029
614	0.19216	0.0641504	0.017952
614.2	0.191979	0.0641295	0.0176301
614.4	0.19128	0.0638218	0.0171486
614.6	0.191073	0.063506	0.0168265
614.8	0.191169	0.0632219	0.016717
615	0.191397	0.063465	0.0168388
615.2	0.19127	0.0628534	0.0168874
615.4	0.19045	0.0627043	0.0167743
615.6	0.19007	0.062829	0.0173377
615.8	0.189723	0.0626811	0.0178906
616	0.18882	0.0624774	0.0177783
616.2	0.188842	0.0622012	0.0174385
616.4	0.188906	0.0621861	0.0171394
616.6	0.188533	0.0619187	0.0167834
616.8	0.188899	0.0617908	0.016814
617	0.188991	0.0621995	0.0167398
617.2	0.189571	0.062506	0.0170381
617.4	0.190074	0.0630478	0.0178448
617.6	0.189717	0.0641681	0.0183056
617.8	0.189438	0.0642838	0.0178304
618	0.18889	0.0636483	0.017289
618.2	0.188447	0.0635779	0.016723
618.4	0.188434	0.0636472	0.0168361
618.6	0.188737	0.0639402	0.0169724
618.8	0.188543	0.063699	0.0169591
619	0.188305	0.0637501	0.017623
619.2	0.188093	0.063204	0.0182298
619.4	0.187866	0.0633013	0.0185921
619.6	0.187834	0.0625406	0.0182336
619.8	0.187142	0.0615233	0.0179847
620	0.186736	0.0611008	0.017853
620.2	0.186953	0.0606813	0.0176174
620.4	0.186024	0.0602869	0.0170785
620.6	0.186028	0.0603062	0.0172093
620.8	0.185365	0.0598372	0.016998
621	0.184592	0.0599662	0.0170177
621.2	0.184745	0.0604095	0.0171353
621.4	0.184487	0.0605536	0.0175932
621.6	0.184196	0.0606235	0.0175273
621.8	0.184249	0.0603827	0.0167869
622	0.183758	0.0596431	0.0164038
622.2	0.183475	0.059984	0.0160106
622.4	0.1837	0.0604838	0.0160096
622.6	0.18358	0.0602566	0.0158484
622.8	0.18375	0.0606737	0.0162682
623	0.184117	0.0616654	0.017342
623.2	0.184049	0.0614024	0.0177613
623.4	0.183883	0.0613343	0.0180428
623.6	0.18355	0.0613156	0.0182963
623.8	0.18247	0.0604632	0.0180395
624	0.181683	0.0608809	0.0179112
624.2	0.181403	0.0604795	0.0171017
624.4	0.180244	0.0599391	0.0170182
624.6	0.179994	0.059986	0.0171527
624.8	0.178821	0.0593948	0.0165975
625	0.178543	0.0598079	0.0167363
625.2	0.178937	0.0599562	0.0166229
625.4	0.178876	0.0596778	0.0164279
625.6	0.179447	0.0597973	0.0164693
625.8	0.179577	0.0592819	0.0159521
626	0.17918	0.058826	0.0154619
626.2	0.179004	0.059156	0.0150854
626.4	0.179225	0.059342	0.015079
626.6	0.179223	0.0590413	0.0151042
626.8	0.179253	0.0594356	0.0151324
627	0.17886	0.058916	0.0150182
627.2	0.178417	0.0581161	0.0148857
627.4	0.178069	0.0579317	0.014673
627.6	0.178327	0.0584365	0.0148492
627.8	0.177762	0.0577777	0.0141698
628	0.176896	0.057486	0.0140119
628.2	0.176492	0.0569376	0.013515
628.4	0.176423	0.0568177	0.0141342
628.6	0.175863	0.0568945	0.0139264
628.8	0.17574	0.0570977	0.0141968
629	0.17584	0.0577281	0.0147334
629.2	0.176335	0.057944	0.0150643
629.4	0.176165	0.0582501	0.0156799
629.6	0.176521	0.0584733	0.0162544
629.8	0.176655	0.0583833	0.016485
630	0.175923	0.0587054	0.0166785
630.2	0.175567	0.058949	0.0171137
630.4	0.175123	0.0585972	0.0169661
630.6	0.175017	0.0581776	0.0169899
630.8	0.174761	0.0580606	0.0170502
631	0.174568	0.0576427	0.017273
631.2	0.174739	0.0581585	0.0175774
631.4	0.174453	0.0578294	0.0170755
631.6	0.174592	0.0580246	0.0170407
631.8	0.173674	0.057379	0.016545
632	0.173084	0.0569785	0.0158548
632.2	0.173227	0.0574108	0.0154961
632.4	0.173415	0.0572821	0.0155137
632.6	0.172808	0.0571135	0.0151149
632.8	0.172825	0.0572086	0.0147808
633	0.172992	0.0573605	0.0143787
633.2	0.173276	0.0575449	0.0146217
633.4	0.172759	0.0574226	0.0146728
633.6	0.172823	0.0577088	0.0150007
633.8	0.173309	0.0580662	0.0151349
634	0.172529	0.0579866	0.0152686
634.2	0.172448	0.0574859	0.0157264
634.4	0.17238	0.0569903	0.0154778
634.6	0.172526	0.0569678	0.0164143
634.8	0.172411	0.0566889	0.0165366
635	0.171905	0.0561853	0.016531
635.2	0.171606	0.0560352	0.0161659
635.4	0.171323	0.0552178	0.0157444
635.6	0.171198	0.0549907	0.0158032
635.8	0.170539	0.0544022	0.0155204
636	0.170508	0.0543536	0.0154208
636.2	0.169967	0.0540716	0.0154065
636.4	0.170008	0.0535665	0.0153034
636.6	0.169539	0.0535253	0.0148316
636.8	0.169589	0.0538722	0.0145169
637	0.169736	0.0539907	0.0146864
637.2	0.169326	0.0544502	0.015263
637.4	0.169017	0.0547894	0.0154562
637.6	0.169023	0.0553539	0.0157033
637.8	0.168775	0.0554838	0.0152279
638	0.168183	0.0556123	0.0153734
638.2	0.167823	0.0554839	0.0154457
638.4	0.167477	0.0553018	0.015147
638.6	0.167069	0.0551572	0.0150653
638.8	0.166767	0.0549677	0.0147296
639	0.166493	0.0548239	0.0148513
639.2	0.167007	0.0547746	0.0149156
639.4	0.167346	0.0544673	0.0151411
639.6	0.167302	0.0542619	0.0152339
639.8	0.167142	0.0539338	0.015503
640	0.166776	0.0532686	0.0154678
640.2	0.166374	0.052725	0.0154465
640.4	0.166412	0.0527502	0.0153378
640.6	0.166291	0.0524749	0.0149836
640.8	0.166405	0.0527148	0.0150618
641	0.166054	0.0526507	0.0149261
641.2	0.166154	0.0530678	0.0151861
641.4	0.166502	0.0534982	0.0151114
641.6	0.166232	0.0532909	0.0145458
641.8	0.165653	0.0533234	0.0137805
642	0.16581	0.053658	0.0138037
642.2	0.165748	0.0535465	0.0135052
642.4	0.165685	0.0537591	0.013053
642.6	0.165619	0.0539274	0.0125018
642.8	0.165599	0.0542627	0.013311
643	0.165509	0.0539561	0.0132132
643.2	0.165301	0.0539109	0.013356
643.4	0.165041	0.0542836	0.0137751
643.6	0.165136	0.0542381	0.0142939
643.8	0.164734	0.0541732	0.0147969
644	0.164504	0.0534985	0.0149084
644.2	0.16389	0.053544	0.0150879
644.4	0.163559	0.0535058	0.0150862
644.6	0.16333	0.0534308	0.0148261
644.8	0.162918	0.0535527	0.0151492
645	0.162448	0.0531164	0.0153101
645.2	0.16257	0.0531372	0.0155841
645.4	0.16234	0.0528642	0.0156994
645.6	0.161475	0.0521586	0.0150993
645.8	0.16137	0.0525396	0.0152357
646	0.16141	0.052511	0.0152995
646.2	0.160911	0.0521978	0.0145861
646.4	0.160632	0.0524868	0.0140644
646.6	0.159781	0.0519184	0.0129761
646.8	0.159464	0.0515294	0.0125842
647	0.159229	0.0511379	0.0119124
647.2	0.158884	0.0510516	0.0117964
[truncated: 1,001 more rows]

[truncated: 108 more sheets: fig_s5_pDAm15_DTTR23, fig_s5_pDAm14_DTTR23, fig_s5_pSAA1_1_DAm15, fig_s5_pSAA1_1_DTTR23, fig_s5_pTTRb9_DSAA1-1, fig_s5_pTauR3_DTTR23, fig_s5_pDTMEM2_DTMEM1, fig_s5_pDTMEM2_DTTR23, fig_s5_pDAm14_DTMEM2, fig_s5_pTauR3_DTMEM2, fig_s5_pSAA1_1_DTMEM2, fig_s5_pDTMEM1_DTMEM2, fig_s5_pDAm15_DTMEM2, fig_s5_pDTMEM2_DTMEM2, fig_s5_pTTRb9_DAm15, fig_s5_pTTRb9_DAm14, fig_s5_pSAA1_1_2DT2, fig_s5_pTauR3_2DT2, fig_s5_pDAm14_DSAA1-1, fig_s5_pDAm15_DSAA1-1 …]
