# Supplementary material for: Design of amyloidogenic peptide traps
Source: Nat Chem Biol. 2024 Mar 19;20(8):981–90. doi: 10.1038/s41589-024-01578-5 (PMC11288891; doi:10.1038/s41589-024-01578-5)
Supplement: Supplementary file 6 — Statistical source data. [file 41589_2024_1578_MOESM6_ESM.xlsx]

## Sheet: Fig. 1a BLI
concentrations in M
Titations BLI
C34															C37				C37					C104													CH11									CH15
Time1	2.222E-06	Fit_2.222E-06	2E-05	Fit_2E-05	2.743E-08	Fit_2.743E-08	2.469E-07	Fit_2.469E-07	8.23E-08	Fit_8.23E-08	7.407E-07	Fit_7.407E-07	6.667E-06	Fit_6.667E-06	Time1	2.4E-07	Fit_2.4E-07	2.22E-06	Fit_2.22E-06	7.4E-07	Fit_7.4E-07	8.2E-08	Fit_8.2E-08	Time1	2.469E-07	Fit_2.469E-07	7.407E-07	Fit_7.407E-07	8.23E-08	Fit_8.23E-08	2.743E-08	Fit_2.743E-08	6.667E-06	Fit_6.667E-06	2.222E-06	Fit_2.222E-06	Time1	0.0001481	Fit_1.481E-07	0.001333	Fit_1.333E-06	0.0004444	Fit_4.444E-07	4e-06	Fit_4E-06	Time1	7.5E-06	Fit_7.5E-06	1.5E-05
336.14	0.0171401	0	0.121502	0	0.00196454	0	0.0101551	0	0.0003983	0	0.00696611	0	0.0420249	0	820	-0.00267973	0	0.00296234	0	0.00547496	0	0.00164388	0	323.6	0.00545606	0	0.00891391	0	0.00426586	0	-0.00078538	0	0.0210516	0	0.017514	0	240	0.003795	0	0.013361	0	0.008632	0	0.0107	0	425.61	0.004455	0	0.003962
336.34	0.0208123	0.00606464	0.146921	0.0593285	0.00200785	0.00014059	0.0103755	0.00104624	0.00039332	0.00022462	0.00836283	0.00235989	0.0524716	0.0186807	820.2	-0.00244972	4.708e-05	0.00355227	0.00039275	0.00603926	0.00012486	0.0022936	1.539e-05	323.8	0.00621083	0.00013924	0.0101864	0.00041363	0.00409322	4.212e-05	-0.00084428	2.175e-05	0.0250289	0.00466634	0.0188462	0.00117918	240.2	0.003718	2.19e-05	0.013442	0.000329	0.008566	0.000112	0.012017	0.00099	425.81	0.003619	0.000225	0.004071
336.54	0.0251855	0.011884	0.175879	0.113546	0.00206774	0.0002763	0.0104868	0.00205564	0.00054478	0.00044142	0.0103232	0.00463358	0.0647102	0.0363885	820.4	-0.00231121	9.415e-05	0.00398412	0.0007854	0.00626313	0.0002497	0.00247116	3.077e-05	324	0.00627171	0.0002784	0.0109557	0.00082678	0.00385107	8.422e-05	-0.00136828	4.35e-05	0.0288962	0.00929243	0.0197348	0.00235481	240.4	0.003244	4.38e-05	0.013614	0.000658	0.008029	0.000223	0.013048	0.001976	426.01	0.002613	0.00045	0.004347
336.74	0.0301142	0.0174681	0.207915	0.163092	0.0022817	0.00040731	0.0109065	0.00302947	0.00094136	0.00065068	0.0129114	0.00682422	0.0784505	0.053174	820.6	-0.00209371	0.00014122	0.00457035	0.00117794	0.00658858	0.00037452	0.00327588	4.616e-05	324.2	0.00632636	0.0004175	0.0120668	0.00123946	0.00401927	0.00012632	-0.00149381	6.524e-05	0.0334673	0.0138786	0.0214114	0.00352689	240.6	0.003286	6.58e-05	0.01408	0.000987	0.008187	0.000335	0.014862	0.002959	426.21	0.002019	0.000673	0.004788
336.94	0.0354973	0.0228263	0.241999	0.208369	0.00247031	0.00053379	0.0118075	0.00396901	0.00145493	0.00085267	0.0157077	0.00893483	0.0933141	0.0690854	820.8	-0.00149748	0.00018829	0.00517625	0.00157037	0.00697873	0.00049934	0.0038247	6.154e-05	324.4	0.00635777	0.00055652	0.0130022	0.00165168	0.00383847	0.0001684	-0.00191752	8.697e-05	0.0388723	0.0184252	0.0229943	0.00469544	240.8	0.003207	8.77e-05	0.014838	0.001315	0.008299	0.000447	0.016652	0.003937	426.41	0.001203	0.000896	0.004888
337.14	0.041608	0.0279678	0.277221	0.249746	0.00262784	0.00065588	0.0128557	0.00487546	0.00207539	0.00104762	0.018407	0.0109683	0.109257	0.0841681	821	-0.00134669	0.00023536	0.00592	0.00196269	0.00729485	0.00062414	0.00416011	7.692e-05	324.6	0.00627011	0.00069548	0.0134447	0.00206342	0.00353075	0.00021046	-0.0025518	0.0001087	0.0443805	0.0229326	0.0243302	0.00586046	241	0.003236	0.00011	0.015875	0.001642	0.00848	0.000558	0.018675	0.004911	426.61	0.001159	0.001117	0.005619
337.34	0.0474379	0.0329014	0.312448	0.287557	0.00294039	0.00077375	0.0136838	0.00574998	0.00316412	0.0012358	0.0209954	0.0129276	0.125546	0.0984653	821.2	-0.00125631	0.00028242	0.00644846	0.0023549	0.00733847	0.00074892	0.00408169	9.23e-05	324.8	0.0067861	0.00083436	0.0141567	0.0024747	0.00405114	0.00025252	-0.00265834	0.00013043	0.0508818	0.0274011	0.0263064	0.00702197	241.2	0.003158	0.000131	0.016809	0.001969	0.008981	0.000669	0.020418	0.00588	426.81	0.001313	0.001338	0.00603
337.54	0.0533131	0.0376355	0.346529	0.322112	0.00283614	0.00088753	0.0142477	0.00659369	0.00361928	0.00141743	0.0233205	0.0148152	0.141465	0.112018	821.4	-0.00132389	0.00032949	0.00689001	0.002747	0.00746392	0.00087369	0.00382915	0.00010769	325	0.00684581	0.00097317	0.0147923	0.00288551	0.00427142	0.00029456	-0.00289082	0.00015215	0.0569749	0.0318311	0.0279233	0.00817997	241.4	0.003151	0.000153	0.01735	0.002296	0.008748	0.000781	0.022486	0.006846	427.01	0.001902	0.001557	0.007011
337.74	0.0587042	0.0421782	0.378559	0.353689	0.00270255	0.00099737	0.0151647	0.00740769	0.00376284	0.00159274	0.0255518	0.0166339	0.157074	0.124865	821.6	-0.00147383	0.00037654	0.00744489	0.00313899	0.00760143	0.00099844	0.00323771	0.00012307	325.2	0.00688925	0.00111191	0.0158981	0.00329585	0.00450656	0.00033659	-0.00271411	0.00017386	0.0637682	0.0362228	0.030102	0.00933449	241.6	0.002947	0.000175	0.018491	0.002621	0.008965	0.000892	0.024482	0.007808	427.21	0.00196	0.001776	0.00758
337.94	0.0636857	0.0465371	0.407621	0.382545	0.00239369	0.00110341	0.0158143	0.00819302	0.00396736	0.00176195	0.0281476	0.0183862	0.17153	0.137042	821.8	-0.00103665	0.0004236	0.00867282	0.00353088	0.0080063	0.00112319	0.00314758	0.00013845	325.4	0.00670827	0.00125057	0.0168548	0.00370572	0.00405197	0.0003786	-0.0029596	0.00019557	0.070356	0.0405767	0.0323186	0.0104855	241.8	0.00268	0.000197	0.019475	0.002947	0.009446	0.001003	0.026559	0.008766	427.41	0.001976	0.001993	0.007612
338.14	0.0678867	0.0507198	0.432278	0.408916	0.00190836	0.00120577	0.0161739	0.00895068	0.00417781	0.00192528	0.0301684	0.0200745	0.184476	0.148586	822	-0.00066049	0.00047065	0.00994931	0.00392265	0.00861329	0.00124791	0.0031027	0.00015383	325.6	0.0067016	0.00138917	0.0175446	0.00411512	0.00436141	0.00042061	-0.00258161	0.00021728	0.0766697	0.044893	0.0348332	0.0116331	242	0.0028	0.000219	0.020555	0.003272	0.009959	0.001114	0.02844	0.00972	427.61	0.002453	0.00221	0.008025
338.34	0.0714464	0.0547333	0.451175	0.433015	0.00148106	0.00130459	0.016555	0.00968166	0.00434398	0.00208292	0.0314037	0.021701	0.195227	0.159528	822.2	-0.00076566	0.0005177	0.0109301	0.00431432	0.00887597	0.00137262	0.00246728	0.00016921	325.8	0.006006	0.0015277	0.0175857	0.00452406	0.0040436	0.0004626	-0.00266647	0.00023898	0.081907	0.0491721	0.0366394	0.0127772	242.2	0.002767	0.000241	0.021797	0.003596	0.01045	0.001225	0.030151	0.01067	427.81	0.003223	0.002425	0.008676
338.54	0.0749668	0.0585845	0.468002	0.455037	0.00137212	0.00139998	0.0166964	0.0103869	0.00414412	0.00223508	0.0324526	0.0232682	0.204502	0.169901	822.4	-3.649e-05	0.00056475	0.0122171	0.00470588	0.00929444	0.00149732	0.00240112	0.00018459	326	0.00612609	0.00166615	0.0178196	0.00493253	0.00326852	0.00050458	-0.0028768	0.00026067	0.0868356	0.0534142	0.0379992	0.0139178	242.4	0.002578	0.000263	0.022646	0.003921	0.011183	0.001336	0.032168	0.011616	428.01	0.003956	0.00264	0.009455
338.74	0.0781542	0.06228	0.483153	0.475162	0.00122326	0.00149207	0.0168998	0.0110673	0.00350293	0.00238195	0.0334393	0.0247781	0.213005	0.179733	822.6	0.00032574	0.00061179	0.0134357	0.00509733	0.00952387	0.00162201	0.00247453	0.00019996	326.2	0.00633436	0.00180453	0.0182097	0.00534054	0.00358572	0.00054654	-0.00302219	0.00028236	0.0922308	0.0576198	0.0393682	0.015055	242.6	0.002914	0.000284	0.023908	0.004244	0.011999	0.001447	0.034118	0.012558	428.21	0.004649	0.002854	0.009898
338.94	0.0816551	0.065826	0.496822	0.493553	0.0011645	0.00158097	0.0172639	0.0117237	0.003784	0.00252371	0.0343898	0.0262329	0.220845	0.189053	822.8	-2.624e-05	0.00065883	0.0140267	0.00548868	0.00943645	0.00174667	0.00240383	0.00021534	326.4	0.00628054	0.00194285	0.0192921	0.00574809	0.0040188	0.00058849	-0.00308748	0.00030405	0.0972951	0.0617891	0.0411007	0.0161888	242.8	0.002631	0.000306	0.024395	0.004567	0.011588	0.001558	0.035123	0.013496	428.41	0.004382	0.003066	0.0104
339.14	0.0851611	0.0692286	0.509272	0.51036	0.00142595	0.00166679	0.0177901	0.012357	0.00407541	0.00266054	0.0355043	0.0276345	0.228756	0.197888	823	0.00023941	0.00070587	0.0146416	0.00587991	0.00966103	0.00187133	0.00230193	0.00023072	326.6	0.00681361	0.00208109	0.0201437	0.00615517	0.00475584	0.00063043	-0.00288575	0.00032573	0.102751	0.0659224	0.0437315	0.0173192	243	0.00296	0.000328	0.024797	0.00489	0.011738	0.001669	0.036875	0.01443	428.61	0.005583	0.003278	0.011288
339.34	0.0884645	0.0724937	0.520677	0.525719	0.00157102	0.00174963	0.0173351	0.012968	0.00413458	0.00279261	0.0365645	0.0289849	0.235595	0.206263	823.2	0.00054679	0.0007529	0.0156516	0.00627104	0.0100698	0.00199597	0.00169795	0.00024609	326.8	0.00726604	0.00221926	0.0209276	0.00656178	0.00495508	0.00067236	-0.00279339	0.0003474	0.10733	0.0700201	0.0454789	0.0184461	243.2	0.002614	0.00035	0.025544	0.005212	0.012041	0.00178	0.038447	0.015361	428.81	0.005673	0.003489	0.011723
339.54	0.0915378	0.0756266	0.530993	0.539754	0.00109442	0.00182961	0.0169847	0.0135575	0.00383492	0.00292008	0.0371786	0.030286	0.24163	0.214201	823.4	0.00083138	0.00079994	0.0166839	0.00666205	0.0107568	0.0021206	0.00221533	0.00026147	327	0.00784992	0.00235736	0.0215792	0.00696793	0.00543656	0.00071427	-0.00299236	0.00036907	0.11212	0.0740824	0.0478036	0.0195697	243.4	0.002479	0.000372	0.025831	0.005533	0.011642	0.00189	0.039687	0.016287	429.01	0.006215	0.003699	0.012177
339.74	0.0942914	0.0786329	0.540515	0.55258	0.00127648	0.00190681	0.017087	0.0141262	0.00372555	0.00304312	0.0380938	0.0315396	0.24745	0.221726	823.6	0.00160387	0.00084697	0.0177894	0.00705296	0.0115666	0.00224521	0.00222793	0.00027684	327.2	0.00792472	0.00249539	0.0222916	0.00737362	0.00578844	0.00075617	-0.00275796	0.00039074	0.116522	0.0781096	0.0493401	0.0206898	243.6	0.003152	0.000394	0.026582	0.005855	0.012358	0.002001	0.041288	0.01721	429.21	0.005815	0.003908	0.01214
339.94	0.0969796	0.0815176	0.549718	0.564302	0.00168564	0.00198135	0.0180953	0.0146749	0.00388042	0.00316188	0.0391631	0.0327473	0.253048	0.228859	823.8	0.00179379	0.00089399	0.0189213	0.00744377	0.0120802	0.00236981	0.00254428	0.00029222	327.4	0.00819084	0.00263335	0.0227585	0.00777885	0.0048985	0.00079806	-0.00318969	0.0004124	0.120543	0.0821022	0.0502599	0.0218066	243.8	0.002745	0.000415	0.026459	0.006175	0.011457	0.002112	0.041739	0.018129	429.41	0.005808	0.004116	0.012231
340.14	0.0998457	0.0842857	0.558408	0.575013	0.00159062	0.0020533	0.018536	0.0152043	0.00387737	0.00327651	0.0401436	0.033911	0.258443	0.235621	824	0.00140721	0.00094102	0.019896	0.00783446	0.012028	0.00249439	0.00223976	0.00030759	327.6	0.00835304	0.00277124	0.0232987	0.00818362	0.00476838	0.00083994	-0.00344863	0.00043405	0.123724	0.0860603	0.0518911	0.0229201	244	0.002664	0.000437	0.026726	0.006495	0.011285	0.002222	0.04215	0.019044	429.61	0.005983	0.004323	0.012824
340.34	0.102427	0.0869418	0.566067	0.584802	0.00137368	0.00212275	0.0186456	0.015715	0.00373147	0.00338715	0.0411167	0.0350321	0.263385	0.24203	824.2	0.00109518	0.00098804	0.0206949	0.00822504	0.0121378	0.00261896	0.00266336	0.00032296	327.8	0.00908755	0.00290905	0.0246143	0.00858792	0.00552026	0.0008818	-0.00301726	0.0004557	0.127621	0.0899842	0.0539609	0.0240301	244.2	0.002397	0.000459	0.02656	0.006815	0.011137	0.002332	0.042713	0.019955	429.81	0.005779	0.004529	0.012692
340.54	0.10478	0.0894905	0.573674	0.593747	0.00132319	0.0021898	0.0191653	0.0162077	0.00380036	0.00349394	0.0422792	0.0361123	0.268203	0.248106	824.4	0.00106526	0.00103506	0.0212638	0.00861552	0.0122732	0.00274351	0.00283318	0.00033833	328	0.00844501	0.0030468	0.02478	0.00899177	0.00517198	0.00092365	-0.00341105	0.00047734	0.130678	0.0938743	0.0552651	0.0251368	244.4	0.00224	0.000481	0.027072	0.007134	0.010929	0.002443	0.04376	0.020863	430.01	0.005847	0.004734	0.013325
340.74	0.106809	0.0919361	0.580399	0.601922	0.0011	0.00225453	0.019692	0.0166831	0.00414382	0.00359702	0.0434562	0.0371531	0.272128	0.253865	824.6	0.001496	0.00108207	0.0221001	0.00900589	0.012603	0.00286805	0.00362571	0.0003537	328.2	0.00875554	0.00318448	0.0255224	0.00939515	0.00552364	0.00096549	-0.0030873	0.00049898	0.134375	0.0977308	0.0576213	0.0262402	244.6	0.002428	0.000502	0.027421	0.007453	0.01141	0.002553	0.044789	0.021766	430.21	0.006132	0.004939	0.013652
340.94	0.109385	0.0942828	0.58658	0.609392	0.00139895	0.00231702	0.0205831	0.0171417	0.00456553	0.00369651	0.0446527	0.0381558	0.276563	0.259325	824.8	0.00115058	0.00112909	0.0221776	0.00939615	0.0126333	0.00299258	0.00331545	0.00036908	328.4	0.00929118	0.00332208	0.0261243	0.00979808	0.00554141	0.00100732	-0.00312042	0.00052062	0.138367	0.101554	0.0592069	0.0273402	244.8	0.002379	0.000524	0.027617	0.007771	0.011018	0.002663	0.045339	0.022666	430.41	0.006376	0.005142	0.013796
341.14	0.111629	0.0965347	0.592138	0.616219	0.00145977	0.00237734	0.0213028	0.0175842	0.0045769	0.00379254	0.0456044	0.0391218	0.280791	0.2645	825	0.00075363	0.0011761	0.0227838	0.0097863	0.0127177	0.00311709	0.00360156	0.00038445	328.6	0.00984349	0.00345962	0.0261432	0.0102005	0.00557084	0.00104913	-0.00311516	0.00054225	0.141877	0.105344	0.0603703	0.028437	245	0.002147	0.000546	0.027784	0.008089	0.010618	0.002773	0.04601	0.023563	430.61	0.006732	0.005345	0.014947
341.34	0.113298	0.0986954	0.596985	0.622457	0.00176995	0.00243557	0.0214632	0.0180111	0.00487368	0.00388523	0.0470607	0.0400527	0.284588	0.269405	825.2	0.0005666	0.0012231	0.0224931	0.0101764	0.0122415	0.00324159	0.0031862	0.00039981	328.8	0.0101283	0.00359708	0.0269254	0.0106026	0.0055339	0.00109093	-0.00283347	0.00056387	0.145821	0.109102	0.0618758	0.0295304	245.2	0.00214	0.000568	0.027887	0.008406	0.010696	0.002883	0.046908	0.024455	430.81	0.007333	0.005546	0.015459
341.54	0.115056	0.100769	0.601655	0.628158	0.00183161	0.00249179	0.02202	0.0184229	0.00463866	0.00397469	0.0486744	0.0409494	0.288215	0.274055	825.4	0.00065289	0.00127011	0.0226874	0.0105663	0.012212	0.00336607	0.00293593	0.00041518	329	0.0102566	0.00373448	0.0275881	0.0110041	0.0054331	0.00113271	-0.00252957	0.00058549	0.148985	0.112827	0.0631468	0.0306205	245.4	0.00203	0.00059	0.028457	0.008723	0.009996	0.002993	0.04827	0.025344	431.01	0.007644	0.005747	0.016018
341.74	0.116385	0.102758	0.606157	0.633368	0.0020318	0.00254606	0.0227882	0.0188203	0.00471777	0.00406105	0.0500875	0.0418135	0.291834	0.278463	825.6	0.00070367	0.00131711	0.0230421	0.0109561	0.0125784	0.00349054	0.00267863	0.00043055	329.2	0.0106455	0.0038718	0.0286459	0.0114052	0.00542075	0.00117449	-0.001989	0.0006071	0.153139	0.11652	0.0653864	0.0317074	245.6	0.001893	0.000611	0.029597	0.00904	0.01042	0.003103	0.049272	0.026229	431.21	0.007419	0.005947	0.015912
341.94	0.117474	0.104667	0.610288	0.638129	0.00182315	0.00259844	0.0227267	0.0192036	0.00484371	0.0041444	0.0511808	0.0426459	0.294679	0.282642	825.8	0.00124691	0.00136411	0.0241061	0.0113458	0.0132434	0.003615	0.0028765	0.00044592	329.4	0.01106	0.00400905	0.0294499	0.0118058	0.00555157	0.00121625	-0.00179013	0.00062871	0.157098	0.120181	0.0672256	0.0327909	245.8	0.002085	0.000633	0.029904	0.009355	0.01124	0.003213	0.05055	0.027111	431.41	0.007321	0.006146	0.015953
342.14	0.118107	0.106499	0.613884	0.64248	0.00150998	0.00264902	0.0225518	0.0195735	0.00473947	0.00422485	0.0515435	0.043448	0.297154	0.286602	826	0.00135382	0.0014111	0.0247749	0.0117354	0.0138829	0.00373944	0.00326372	0.00046129	329.6	0.0111554	0.00414624	0.0299854	0.012206	0.00583946	0.001258	-0.00141987	0.00065032	0.160699	0.123811	0.068962	0.0338712	246	0.002493	0.000655	0.030962	0.009671	0.011623	0.003323	0.051774	0.027988	431.61	0.00722	0.006344	0.016657
342.34	0.118978	0.108257	0.617059	0.646456	0.00184958	0.00269784	0.0226388	0.0199303	0.0048504	0.0043025	0.0518233	0.0442208	0.299482	0.290357	826.2	0.00147626	0.00145809	0.0257175	0.012125	0.0143683	0.00386386	0.00290976	0.00047665	329.8	0.0112394	0.00428335	0.0304023	0.0126057	0.00521784	0.00129974	-0.00144348	0.00067192	0.163627	0.127409	0.0702229	0.0349483	246.2	0.002179	0.000676	0.031744	0.009986	0.012337	0.003433	0.053036	0.028863	431.81	0.007183	0.006541	0.017352
342.54	0.120493	0.109944	0.620039	0.650089	0.00203334	0.00274497	0.0230991	0.0202745	0.00477586	0.00437745	0.0519205	0.0449653	0.301501	0.293916	826.4	0.00214426	0.00150508	0.0267803	0.0125143	0.0145026	0.00398827	0.00307707	0.00049202	330	0.0116323	0.00442039	0.0309096	0.013005	0.00489856	0.00134146	-0.00134377	0.00069351	0.16698	0.130976	0.0714019	0.036022	246.4	0.002493	0.000698	0.032629	0.0103	0.013278	0.003542	0.054142	0.029733	432.01	0.006845	0.006738	0.017281
342.74	0.121252	0.111562	0.622905	0.65341	0.00188216	0.00279047	0.0231852	0.0206067	0.00525038	0.00444979	0.0519525	0.0456826	0.303732	0.297289	826.6	0.00201016	0.00155207	0.0270165	0.0129036	0.0140296	0.00411267	0.00284905	0.00050738	330.2	0.0119201	0.00455736	0.0313437	0.0134038	0.0054774	0.00138317	-0.00135672	0.0007151	0.170562	0.134513	0.0729081	0.0370926	246.6	0.002818	0.00072	0.033177	0.010614	0.013624	0.003652	0.054958	0.0306	432.21	0.007099	0.006933	0.018501
342.94	0.122556	0.113115	0.625762	0.656444	0.00198854	0.00283439	0.0232442	0.0209271	0.00632593	0.00451962	0.0516378	0.0463738	0.305974	0.300487	826.8	0.00197564	0.00159906	0.0274781	0.0132928	0.0140893	0.00423705	0.00238745	0.00052274	330.4	0.0118984	0.00469427	0.0318477	0.0138022	0.00578683	0.00142487	-0.00121196	0.00073668	0.173563	0.138019	0.074498	0.0381599	246.8	0.002592	0.000742	0.033245	0.010928	0.013598	0.003761	0.055905	0.031463	432.41	0.007039	0.007128	0.019033
343.14	0.12306	0.114606	0.628379	0.659217	0.00223237	0.00287679	0.023386	0.0212362	0.00652511	0.00458701	0.0515383	0.0470397	0.30792	0.303518	827	0.00198806	0.00164604	0.0277836	0.0136819	0.014524	0.00436142	0.00189489	0.00053811	330.6	0.0127163	0.0048311	0.0325411	0.0142001	0.00628929	0.00146655	-0.00141721	0.00075826	0.176699	0.141495	0.0765785	0.039224	247	0.002634	0.000763	0.033817	0.011241	0.014605	0.003871	0.05688	0.032323	432.61	0.007418	0.007321	0.01928
343.34	0.123462	0.116035	0.630913	0.661751	0.00234101	0.00291772	0.0230019	0.0215345	0.00654673	0.00465207	0.0519109	0.0476812	0.309204	0.306392	827.2	0.00194917	0.00169302	0.028777	0.0140708	0.0149472	0.00448578	0.00160015	0.00055347	330.8	0.0127138	0.00496786	0.0333963	0.0145975	0.00696976	0.00150823	-0.00165155	0.00077983	0.179534	0.14494	0.0776639	0.0402849	247.2	0.002259	0.000785	0.034209	0.011553	0.01471	0.00398	0.057719	0.033179	432.81	0.007248	0.007514	0.019392
343.54	0.124191	0.117408	0.633168	0.664067	0.00205607	0.00295723	0.0232145	0.0218222	0.00638946	0.00471486	0.0524287	0.0482993	0.310543	0.309115	827.4	0.00176355	0.00173999	0.0294156	0.0144597	0.0149021	0.00461012	0.00179051	0.00056883	331	0.0131984	0.00510455	0.0339888	0.0149945	0.00766325	0.00154989	-0.00141608	0.0008014	0.18265	0.148356	0.0795544	0.0413426	247.4	0.002252	0.000807	0.034791	0.011866	0.015533	0.00409	0.058378	0.034032	433.01	0.007853	0.007706	0.020069
343.74	0.125005	0.118724	0.635374	0.666183	0.00199103	0.00299538	0.0234144	0.0220999	0.00626757	0.00477546	0.0528092	0.0488949	0.311932	0.311697	827.6	0.00162848	0.00178697	0.0300458	0.0148485	0.0152056	0.00473444	0.00146848	0.00058419	331.2	0.0132617	0.00524117	0.0343384	0.0153911	0.00791816	0.00159154	-0.00135003	0.00082296	0.185077	0.151743	0.0805199	0.0423971	247.6	0.002519	0.000828	0.035463	0.012177	0.016194	0.004199	0.059171	0.034881	433.21	0.007382	0.007897	0.020254
343.94	0.126161	0.119988	0.637912	0.668117	0.00210571	0.0030322	0.0237503	0.0223677	0.00623933	0.00483396	0.0531134	0.0494687	0.313859	0.314145	827.8	0.00121186	0.00183394	0.0305593	0.0152371	0.0150437	0.00485875	0.00141807	0.00059955	331.4	0.0137746	0.00537773	0.0350556	0.0157872	0.00817254	0.00163317	-0.0006851	0.00084452	0.187771	0.1551	0.0815805	0.0434484	247.8	0.002418	0.00085	0.035545	0.012488	0.016063	0.004308	0.059837	0.035726	433.41	0.007611	0.008088	0.020736
344.14	0.126999	0.1212	0.640201	0.669884	0.00220327	0.00306775	0.0237114	0.0226261	0.00607146	0.00489042	0.0532463	0.0500215	0.315682	0.316465	828	0.00101773	0.0018809	0.0307912	0.0156256	0.0148575	0.00498305	0.00153045	0.00061491	331.6	0.0139888	0.00551421	0.0355699	0.0161828	0.00850427	0.00167479	-0.00055913	0.00086608	0.189668	0.158429	0.0829721	0.0444966	248	0.00296	0.000872	0.035697	0.012799	0.016711	0.004417	0.060453	0.036568	433.61	0.008357	0.008277	0.021545
344.34	0.127508	0.122363	0.64188	0.671499	0.00221362	0.00310206	0.0235052	0.0228754	0.00582352	0.00494492	0.0529702	0.0505541	0.316931	0.318664	828.2	0.00164791	0.00192787	0.031555	0.0160141	0.0152716	0.00510734	0.00219435	0.00063027	331.8	0.0134008	0.00565062	0.0362598	0.016578	0.00780436	0.0017164	-0.00070187	0.00088762	0.191831	0.161728	0.0838083	0.0455416	248.2	0.003106	0.000893	0.036155	0.013109	0.017333	0.004526	0.061878	0.037407	433.81	0.008605	0.008466	0.022418
344.54	0.127373	0.12348	0.643349	0.672975	0.00208272	0.00313519	0.0235754	0.0231159	0.00537255	0.00499753	0.0524426	0.0510673	0.318031	0.320749	828.4	0.00246057	0.00197483	0.0328158	0.0164024	0.0160414	0.0052316	0.00298796	0.00064563	332	0.0131714	0.00578696	0.0363398	0.0169728	0.00726132	0.001758	-0.00081915	0.00090917	0.194327	0.164999	0.0850489	0.0465834	248.4	0.002887	0.000915	0.036696	0.013419	0.017779	0.004635	0.063051	0.038242	434.01	0.009422	0.008654	0.023184
344.74	0.128096	0.124551	0.644632	0.674324	0.00205951	0.00316717	0.0232934	0.0233479	0.0051312	0.0050483	0.0525878	0.0515617	0.319223	0.322725	828.6	0.00286861	0.00202179	0.0336188	0.0167906	0.0160443	0.00535586	0.0034104	0.00066099	332.2	0.0139889	0.00592323	0.0371996	0.017367	0.00779236	0.00179958	-0.00051398	0.00093071	0.196935	0.168242	0.0863712	0.0476221	248.6	0.002903	0.000936	0.036671	0.013729	0.017808	0.004744	0.063507	0.039074	434.21	0.009791	0.00884	0.023524
344.94	0.129323	0.125578	0.646205	0.675556	0.00258435	0.00319804	0.0234469	0.0235718	0.00490803	0.0050973	0.0534368	0.0520381	0.321295	0.324598	828.8	0.00331767	0.00206874	0.0347789	0.0171787	0.0168177	0.0054801	0.00441195	0.00067635	332.4	0.0144171	0.00605943	0.0381242	0.0177609	0.00757026	0.00184116	-0.00044045	0.00095224	0.199844	0.171457	0.0875699	0.0486577	248.8	0.00316	0.000958	0.037186	0.014037	0.017763	0.004853	0.064568	0.039902	434.41	0.010122	0.009027	0.023897
345.14	0.129896	0.126565	0.647811	0.676683	0.00265833	0.00322784	0.0234829	0.0237878	0.00453266	0.00514461	0.0544746	0.0524971	0.322796	0.326373	829	0.00381847	0.0021157	0.0358653	0.0175667	0.0170947	0.00560432	0.00530338	0.00069171	332.6	0.0143353	0.00619557	0.0383472	0.0181543	0.00674838	0.00188272	-0.00102596	0.00097377	0.202266	0.174645	0.0881567	0.0496901	249	0.003088	0.00098	0.037922	0.014346	0.018244	0.004962	0.065871	0.040726	434.61	0.010491	0.009212	0.024875
345.34	0.130598	0.127511	0.649427	0.677712	0.0029384	0.00325661	0.0233859	0.0239962	0.00469066	0.00519026	0.0558126	0.0529393	0.324274	0.328057	829.2	0.00420514	0.00216265	0.0363626	0.0179546	0.0169714	0.00572854	0.00518874	0.00070706	332.8	0.014254	0.00633163	0.039185	0.0185473	0.00622123	0.00192426	-0.00085266	0.00099529	0.204816	0.177804	0.0893171	0.0507194	249.2	0.003449	0.001001	0.038736	0.014654	0.01848	0.005071	0.06685	0.041548	434.81	0.011543	0.009396	0.024901
345.54	0.131163	0.128419	0.650972	0.678653	0.00298707	0.00328439	0.0236292	0.0241972	0.00477979	0.00523433	0.0566734	0.0533653	0.325638	0.329652	829.4	0.00448365	0.0022096	0.0376404	0.0183424	0.0175121	0.00585273	0.00559239	0.00072242	333	0.0149259	0.00646762	0.0396699	0.0189398	0.00640101	0.0019658	-0.00079063	0.00101681	0.206946	0.180937	0.0910611	0.0517457	249.4	0.003368	0.001023	0.0393	0.014961	0.018306	0.005179	0.067712	0.042366	435.01	0.012039	0.00958	0.024988
345.74	0.131577	0.12929	0.652346	0.679512	0.00291416	0.0033112	0.0235044	0.0243912	0.00464081	0.00527687	0.0571319	0.0537758	0.326727	0.331164	829.6	0.0045385	0.00225654	0.0383105	0.0187301	0.0181363	0.00597692	0.00554355	0.00073777	333.2	0.015435	0.00660354	0.0404047	0.0193318	0.00693991	0.00200732	-0.00048473	0.00103832	0.210112	0.184042	0.0926091	0.0527688	249.6	0.003798	0.001045	0.039822	0.015268	0.018592	0.005288	0.068301	0.04318	435.21	0.01249	0.009763	0.025353
345.94	0.131796	0.130127	0.653549	0.680298	0.00270948	0.00333708	0.0235033	0.0245783	0.00422695	0.00531792	0.0574196	0.0541713	0.327571	0.332598	829.8	0.00447364	0.00230348	0.0395637	0.0191176	0.0187088	0.00610109	0.0053147	0.00075313	333.4	0.0155776	0.0067394	0.0411847	0.0197234	0.00721147	0.00204883	-0.00047574	0.00105983	0.212964	0.187121	0.0938075	0.0537888	249.8	0.004186	0.001066	0.040441	0.015575	0.01884	0.005396	0.068918	0.043991	435.41	0.012874	0.009945	0.025679
346.14	0.132094	0.130929	0.6544	0.681016	0.00263326	0.00336207	0.0235669	0.0247589	0.00420454	0.00535755	0.0578192	0.0545524	0.328647	0.333957	830	0.00428364	0.00235042	0.0404534	0.0195051	0.0194438	0.00622524	0.00556209	0.00076848	333.6	0.0154509	0.00687518	0.041474	0.0201146	0.0065242	0.00209032	-0.00073768	0.00108133	0.215143	0.190173	0.0948819	0.0548058	250	0.004324	0.001088	0.041481	0.015881	0.018358	0.005505	0.06943	0.044799	435.61	0.013054	0.010126	0.025486
346.34	0.132764	0.131699	0.655278	0.681672	0.00296753	0.00338619	0.0238057	0.024933	0.00433361	0.0053958	0.0580553	0.0549195	0.329953	0.335245	830.2	0.00418525	0.00239736	0.0414562	0.0198924	0.0197703	0.00634938	0.00494676	0.00078383	333.8	0.0151599	0.0070109	0.0412701	0.0205053	0.00600743	0.00213181	-0.00111548	0.00110283	0.216471	0.193199	0.0957374	0.0558197	250.2	0.004171	0.001109	0.041805	0.016187	0.018486	0.005613	0.070008	0.045603	435.81	0.013335	0.010306	0.025513
346.54	0.133964	0.132437	0.656534	0.682271	0.00283004	0.00340947	0.0244656	0.0251011	0.00489413	0.00543272	0.0581836	0.0552732	0.331424	0.336466	830.4	0.00446428	0.00244429	0.0420532	0.0202797	0.0202202	0.00647351	0.00514072	0.00079918	334	0.0150838	0.00714654	0.0410228	0.0208956	0.00584183	0.00217328	-0.00155828	0.00112432	0.218571	0.196199	0.0964617	0.0568305	250.4	0.004669	0.001131	0.042414	0.016492	0.018688	0.005721	0.070905	0.046404	436.01	0.013401	0.010486	0.025182
346.74	0.13451	0.133146	0.657699	0.682819	0.00304943	0.00343195	0.0245982	0.0252632	0.00539979	0.00546835	0.0582135	0.055614	0.332809	0.337624	830.6	0.00449808	0.00249122	0.0423382	0.0206668	0.0205853	0.00659762	0.00474375	0.00081454	334.2	0.0153185	0.00728211	0.0417537	0.0212854	0.00606944	0.00221474	-0.00182138	0.00114581	0.221111	0.199173	0.0982748	0.0578383	250.6	0.003837	0.001152	0.041985	0.016797	0.018215	0.00583	0.070777	0.047202	436.21	0.014117	0.010665	0.025972
346.94	0.135178	0.133826	0.658899	0.683319	0.00354614	0.00345365	0.0248365	0.0254196	0.00550897	0.00550275	0.0579275	0.0559423	0.334026	0.338721	830.8	0.0039984	0.00253815	0.0429293	0.0210538	0.0206903	0.00672172	0.00432533	0.00082989	334.4	0.0154224	0.00741762	0.0420983	0.0216748	0.0058076	0.00225618	-0.00209294	0.00116729	0.222971	0.202121	0.0996082	0.0588431	250.8	0.003149	0.001174	0.042175	0.017101	0.01795	0.005938	0.071577	0.047997	436.41	0.014162	0.010843	0.025362
347.14	0.135286	0.134479	0.659792	0.683777	0.00371393	0.0034746	0.0253518	0.0255705	0.00550317	0.00553595	0.0581595	0.0562587	0.334566	0.339761	831	0.00365641	0.00258508	0.0431458	0.0214408	0.0209071	0.0068458	0.00369898	0.00084524	334.6	0.0158686	0.00755306	0.0428293	0.0220637	0.00618714	0.00229761	-0.00267936	0.00118877	0.225187	0.205043	0.101187	0.0598448	251	0.003091	0.001196	0.042706	0.017405	0.018317	0.006046	0.07193	0.048788	436.61	0.014383	0.01102	0.02519
347.34	0.135742	0.135105	0.660656	0.684195	0.00382135	0.00349482	0.0255995	0.0257161	0.00558182	0.00556799	0.0584581	0.0565635	0.335057	0.340747	831.2	0.00344762	0.002632	0.0438165	0.0218276	0.0207631	0.00696987	0.00348186	0.00086059	334.8	0.0158354	0.00768842	0.0436328	0.0224522	0.00661069	0.00233903	-0.00255033	0.00121024	0.227737	0.207941	0.102352	0.0608435	251.2	0.002649	0.001217	0.042922	0.017708	0.018592	0.006154	0.072368	0.049576	436.81	0.014737	0.011196	0.025362
347.54	0.136393	0.135706	0.661748	0.684577	0.00368498	0.00351434	0.0257729	0.0258566	0.00562053	0.00559892	0.0584609	0.0568571	0.335531	0.341681	831.4	0.00278474	0.00267892	0.0438667	0.0222143	0.0207667	0.00709392	0.00295863	0.00087593	335	0.0163735	0.00782372	0.0442746	0.0228403	0.00707867	0.00238044	-0.00189908	0.00123171	0.230247	0.210814	0.104192	0.0618392	251.4	0.002697	0.001239	0.042936	0.018011	0.018422	0.006262	0.072944	0.05036	437.01	0.014375	0.011372	0.025707
347.74	0.13722	0.136283	0.66275	0.684926	0.00394447	0.00353319	0.0262544	0.0259921	0.00588885	0.00562877	0.0581781	0.0571401	0.336461	0.342567	831.6	0.0022127	0.00272583	0.0441252	0.0226009	0.0204167	0.00721796	0.00254038	0.00089128	335.2	0.0165911	0.00795895	0.0450945	0.0232279	0.00746716	0.00242184	-0.00153479	0.00125317	0.232629	0.213661	0.105446	0.0628319	251.6	0.002927	0.00126	0.042807	0.018314	0.018579	0.00637	0.073299	0.051141	437.21	0.013999	0.011547	0.026155
347.94	0.137551	0.136836	0.663042	0.685245	0.00369458	0.00355138	0.0261961	0.0261228	0.00585791	0.00565758	0.0574874	0.0574127	0.336993	0.343407	831.8	0.0020749	0.00277275	0.0440383	0.0229874	0.020342	0.00734199	0.00240262	0.00090663	335.4	0.0169654	0.00809411	0.045889	0.023615	0.00800485	0.00246322	-0.00062583	0.00127463	0.234778	0.216484	0.106678	0.0638216	251.8	0.003048	0.001282	0.04276	0.018616	0.018276	0.006478	0.073989	0.051919	437.41	0.014299	0.011721	0.026231
348.14	0.137171	0.137367	0.663367	0.685537	0.00342525	0.00356894	0.0254739	0.026249	0.00564452	0.0056854	0.056784	0.0576753	0.336963	0.344203	832	0.0023882	0.00281966	0.0442675	0.0233738	0.020382	0.007466	0.00230272	0.00092198	335.6	0.0169642	0.0082292	0.046285	0.0240018	0.00799259	0.00250459	-0.00114338	0.00129608	0.236761	0.219283	0.107638	0.0648083	252	0.003067	0.001303	0.042481	0.018917	0.018201	0.006586	0.074379	0.052694	437.61	0.01493	0.011894	0.027167
348.34	0.136965	0.137877	0.663878	0.685803	0.00341355	0.0035859	0.0248108	0.0263707	0.00538727	0.00571224	0.0562638	0.0579284	0.336987	0.344958	832.2	0.00306889	0.00286657	0.0445609	0.0237601	0.020362	0.00759	0.00265436	0.00093732	335.8	0.0164562	0.00836422	0.046578	0.0243881	0.00799796	0.00254595	-0.00114944	0.00131753	0.23856	0.222058	0.108519	0.065792	252.2	0.003048	0.001325	0.04294	0.019218	0.018502	0.006693	0.074855	0.053466	437.81	0.014775	0.012067	0.027754
348.54	0.136792	0.138366	0.664665	0.686047	0.00328561	0.00360227	0.0246486	0.0264881	0.00544287	0.00573815	0.0559911	0.0581721	0.336929	0.345673	832.4	0.00313855	0.00291347	0.0449673	0.0241462	0.0207821	0.00771398	0.00334308	0.00095267	336	0.0169762	0.00849917	0.0471539	0.0247739	0.00857075	0.00258729	-0.00073736	0.00133897	0.241088	0.224809	0.110234	0.0667728	252.4	0.002778	0.001346	0.042583	0.019519	0.018248	0.006801	0.075368	0.054234	438.01	0.015373	0.012238	0.028161
348.74	0.137268	0.138835	0.665587	0.686269	0.00302179	0.00361807	0.0242583	0.0266013	0.0058863	0.00576316	0.0564927	0.0584071	0.336906	0.346351	832.6	0.00331563	0.00296037	0.0455669	0.0245323	0.0210392	0.00783795	0.00392258	0.00096801	336.2	0.0171776	0.00863405	0.0477316	0.0251593	0.00843359	0.00262863	-0.0009575	0.00136041	0.243312	0.227536	0.110995	0.0677506	252.6	0.002997	0.001368	0.042395	0.019819	0.018165	0.006909	0.076121	0.055	438.21	0.015106	0.012409	0.028702
348.94	0.137153	0.139285	0.666271	0.686473	0.0026365	0.00363332	0.0237766	0.0267106	0.00611553	0.0057873	0.0571931	0.0586334	0.336799	0.346994	832.8	0.00416418	0.00300727	0.0463156	0.0249183	0.0219838	0.00796191	0.00487281	0.00098336	336.4	0.0178261	0.00876886	0.048826	0.0255443	0.00869684	0.00266995	-0.00070198	0.00138184	0.24566	0.230239	0.112621	0.0687255	252.8	0.003043	0.001389	0.042864	0.020119	0.018815	0.007016	0.077512	0.055762	438.41	0.014855	0.012579	0.029349
349.14	0.136851	0.139717	0.666846	0.686659	0.00217944	0.00364804	0.0234723	0.0268161	0.00616597	0.0058106	0.0577778	0.0588514	0.336608	0.347603	833	0.00412364	0.00305417	0.0466702	0.0253041	0.0218948	0.00808585	0.00471619	0.0009987	336.6	0.0180932	0.00890361	0.0493113	0.0259288	0.00818397	0.00271126	-0.00053745	0.00140327	0.247888	0.232919	0.113729	0.0696974	253	0.003083	0.001411	0.042873	0.020418	0.018874	0.007124	0.078143	0.056521	438.61	0.015131	0.012749	0.029998
349.34	0.136845	0.140131	0.667285	0.686828	0.00191422	0.00366226	0.0236033	0.0269178	0.00633432	0.00583309	0.0582499	0.0590615	0.336578	0.34818	833.2	0.00445322	0.00310106	0.047169	0.0256899	0.022093	0.00820977	0.005101	0.00101404	336.8	0.018185	0.00903828	0.0498471	0.0263129	0.00844898	0.00275255	-0.00015512	0.00142469	0.249608	0.235577	0.115143	0.0706664	253.2	0.003614	0.001432	0.043258	0.020717	0.01879	0.007231	0.078406	0.057276	438.81	0.015294	0.012918	0.030063
349.54	0.136763	0.140529	0.667597	0.686984	0.00181944	0.00367598	0.0238604	0.0270159	0.00641037	0.0058548	0.0585202	0.0592639	0.336802	0.348728	833.4	0.00463104	0.00314796	0.0481015	0.0260755	0.022652	0.00833368	0.00561236	0.00102939	337	0.0187385	0.00917289	0.0503166	0.0266966	0.00897298	0.00279383	0.00016142	0.00144611	0.25176	0.238211	0.11644	0.0716325	253.4	0.003955	0.001454	0.043939	0.021016	0.018936	0.007338	0.079128	0.058029	439.01	0.014561	0.013086	0.030507
349.74	0.136483	0.140911	0.667804	0.687125	0.00153429	0.00368922	0.0240118	0.0271106	0.00609399	0.00587575	0.0585328	0.0594589	0.337165	0.349247	833.6	0.00468038	0.00319484	0.0487372	0.026461	0.0230118	0.00845758	0.00579335	0.00104473	337.2	0.0188999	0.00930742	0.0506784	0.0270798	0.00946848	0.0028351	0.00042619	0.00146752	0.253956	0.240822	0.116999	0.0725956	253.6	0.004263	0.001475	0.044593	0.021313	0.018815	0.007446	0.07997	0.058778	439.21	0.014227	0.013253	0.030911
349.94	0.136563	0.141277	0.668094	0.687255	0.0013372	0.00370201	0.0247047	0.0272019	0.00620307	0.00589597	0.0583463	0.0596468	0.338188	0.349739	833.8	0.00439864	0.00324173	0.0492471	0.0268465	0.023191	0.00858147	0.00567973	0.00106007	337.4	0.0185871	0.00944189	0.0505309	0.0274626	0.00884273	0.00287636	0.00018046	0.00148893	0.255406	0.243411	0.117856	0.0735559	253.8	0.004288	0.001497	0.04515	0.021611	0.018913	0.007553	0.080223	0.059525	439.41	0.016021	0.013419	0.030912
350.14	0.136973	0.141628	0.668006	0.687374	0.00151024	0.00371436	0.0248782	0.0272901	0.00661187	0.00591549	0.0580082	0.0598278	0.339399	0.350205	834	0.0045128	0.00328861	0.0496513	0.0272318	0.0235013	0.00870534	0.00621674	0.00107541	337.6	0.0185597	0.00957629	0.0504559	0.0278449	0.00893143	0.0029176	3.233e-05	0.00151033	0.256849	0.245977	0.118343	0.0745132	254	0.004339	0.001518	0.045524	0.021908	0.019206	0.00766	0.081049	0.060268	439.61	0.016762	0.013585	0.030346
350.34	0.137494	0.141965	0.668489	0.687482	0.00180612	0.00372627	0.0250123	0.0273751	0.00673618	0.00593433	0.0579224	0.0600023	0.340313	0.350647	834.2	0.00470864	0.00333549	0.0503474	0.027617	0.0239737	0.00882919	0.00655086	0.00109075	337.8	0.0181939	0.00971062	0.0501077	0.0282268	0.00861216	0.00295884	-0.00054942	0.00153173	0.257529	0.248522	0.119142	0.0754677	254.2	0.004188	0.00154	0.045924	0.022205	0.019903	0.007767	0.082084	0.061008	439.81	0.017411	0.01375	0.030557
350.54	0.138294	0.142289	0.669124	0.687581	0.00220468	0.00373778	0.0255765	0.0274571	0.0071083	0.00595252	0.0583601	0.0601703	0.341351	0.351066	834.4	0.0057544	0.00338237	0.0510658	0.0280021	0.0244719	0.00895303	0.0067981	0.00110609	338	0.0185206	0.00984488	0.0505596	0.0286083	0.00848822	0.00300006	-0.00067366	0.00155312	0.259329	0.251044	0.120028	0.0764193	254.4	0.004516	0.001561	0.046354	0.022501	0.020774	0.007874	0.082952	0.061745	440.01	0.018221	0.013914	0.030474
350.74	0.139051	0.142599	0.669777	0.687671	0.00286851	0.00374888	0.0261257	0.0275363	0.00695443	0.00597007	0.0587294	0.0603322	0.342065	0.351463	834.6	0.00569999	0.00342924	0.0514309	0.0283871	0.0241799	0.00907686	0.00661661	0.00112143	338.2	0.0185046	0.00997907	0.0507046	0.0289894	0.00784283	0.00304126	-0.00120438	0.00157451	0.260765	0.253545	0.12094	0.077368	254.6	0.004425	0.001582	0.046933	0.022797	0.021369	0.007981	0.083521	0.06248	440.21	0.018614	0.014078	0.031092
350.94	0.139644	0.142897	0.670745	0.687754	0.00348062	0.0037596	0.0267974	0.0276126	0.00720209	0.00598701	0.0593886	0.0604882	0.343089	0.351839	834.8	0.0054379	0.00347611	0.0517416	0.028772	0.0239424	0.00920067	0.00593963	0.00113676	338.4	0.0184458	0.0101132	0.0507929	0.02937	0.00791904	0.00308246	-0.00119745	0.00159589	0.262444	0.256024	0.121596	0.0783139	254.8	0.004251	0.001604	0.047153	0.023092	0.021447	0.008088	0.084817	0.063211	440.41	0.01885	0.014241	0.031116
351.14	0.140122	0.143183	0.67149	0.687829	0.004156	0.00376995	0.0274015	0.0276863	0.00761336	0.00600336	0.0600603	0.0606385	0.343978	0.352196	835	0.00588407	0.00352298	0.0524504	0.0291568	0.0245973	0.00932447	0.00591596	0.0011521	338.6	0.0191886	0.0102472	0.0517224	0.0297501	0.00850889	0.00312364	-0.00097033	0.00161727	0.264688	0.258482	0.123136	0.0792569	255	0.004037	0.001625	0.047423	0.023387	0.02186	0.008195	0.08505	0.063939	440.61	0.019406	0.014403	0.031271
351.34	0.140348	0.143457	0.671854	0.687898	0.00457535	0.00377995	0.0276638	0.0277574	0.0074267	0.00601915	0.0600856	0.0607833	0.344244	0.352535	835.2	0.0057128	0.00356985	0.0526052	0.0295415	0.0244039	0.00944825	0.00535641	0.00116744	338.8	0.0192472	0.0103812	0.0524305	0.0301299	0.00820588	0.00316481	-0.00066554	0.00163864	0.266407	0.260918	0.12439	0.080197	255.2	0.003875	0.001647	0.047841	0.023681	0.022069	0.008302	0.085371	0.064664	440.81	0.019939	0.014564	0.031642
351.54	0.14027	0.143721	0.672034	0.687961	0.00431611	0.00378959	0.0274565	0.0278259	0.00664201	0.00603438	0.0593335	0.0609228	0.344324	0.352855	835.4	0.00560827	0.00361671	0.0532255	0.029926	0.0248571	0.00957202	0.00500867	0.00118277	339	0.0191373	0.0105151	0.0530506	0.0305092	0.00806416	0.00320597	-0.00050005	0.00166001	0.268122	0.263334	0.125763	0.0811343	255.4	0.003396	0.001668	0.047841	0.023975	0.021804	0.008408	0.085828	0.065385	441.01	0.019662	0.014725	0.032109
351.74	0.140604	0.143973	0.67202	0.688019	0.00418554	0.0037989	0.0271141	0.0278921	0.00611837	0.00604909	0.0585012	0.0610572	0.344521	0.353159	835.6	0.00601906	0.00366357	0.0536672	0.0303105	0.0251776	0.00969578	0.00481612	0.00119811	339.2	0.0193785	0.010649	0.0531665	0.0308881	0.00781779	0.00324711	-0.00081557	0.00168137	0.2695	0.265729	0.126599	0.0820688	255.6	0.00334	0.001689	0.048047	0.024269	0.022584	0.008515	0.086125	0.066104	441.21	0.020284	0.014885	0.032857
351.94	0.140716	0.144215	0.672095	0.688071	0.00419891	0.00380789	0.0266245	0.0279559	0.00607448	0.00606328	0.0584112	0.0611867	0.344362	0.353447	835.8	0.00588826	0.00371043	0.0535084	0.0306949	0.025095	0.00981952	0.0044376	0.00121344	339.4	0.0196432	0.0107828	0.0532427	0.0312665	0.00796528	0.00328825	-0.00064595	0.00170273	0.270899	0.268103	0.127986	0.0830005	255.8	0.002902	0.001711	0.048349	0.024562	0.022304	0.008621	0.086369	0.06682	441.41	0.020261	0.015044	0.033347
352.14	0.141084	0.144448	0.672926	0.688119	0.00482118	0.00381657	0.026928	0.0280175	0.00609846	0.00607698	0.0588994	0.0613115	0.344868	0.35372	836	0.00606101	0.00375728	0.0540425	0.0310791	0.0249812	0.00994325	0.0042413	0.00122878	339.6	0.0192613	0.0109165	0.0535149	0.0316445	0.00739097	0.00332937	-0.00129291	0.00172408	0.27252	0.270456	0.128861	0.0839294	256	0.002584	0.001732	0.048195	0.024855	0.022524	0.008728	0.086757	0.067533	441.61	0.02044	0.015202	0.0344
352.34	0.141545	0.144671	0.673879	0.688163	0.00519689	0.00382494	0.0271794	0.0280769	0.0060349	0.0060902	0.0592744	0.0614317	0.345298	0.353979	836.2	0.00649669	0.00380413	0.0544548	0.0314633	0.0254026	0.010067	0.00472445	0.00124411	339.8	0.0190636	0.0110501	0.0541502	0.0320221	0.00724853	0.00337047	-0.00147532	0.00174543	0.273657	0.27279	0.129161	0.0848555	256.2	0.00242	0.001754	0.048178	0.025147	0.022484	0.008834	0.087329	0.068243	441.81	0.020295	0.01536	0.034916
352.54	0.141915	0.144885	0.674561	0.688204	0.00498373	0.00383303	0.0273738	0.0281342	0.00629903	0.00610296	0.0594088	0.0615475	0.345288	0.354225	836.4	0.00706211	0.00385098	0.055369	0.0318473	0.0262659	0.0101907	0.00531704	0.00125944	340	0.0190657	0.0111837	0.0545269	0.0323993	0.00668694	0.00341157	-0.00163523	0.00176677	0.27525	0.275103	0.130015	0.0857788	256.4	0.002153	0.001775	0.048207	0.025439	0.02237	0.008941	0.087626	0.068951	442.01	0.020011	0.015517	0.035006
352.74	0.141749	0.145091	0.674757	0.68824	0.00449379	0.00384083	0.0271792	0.0281895	0.00622351	0.00611528	0.05944	0.0616591	0.344792	0.354457	836.6	0.00745554	0.00389783	0.0562659	0.0322312	0.0265828	0.0103143	0.00569649	0.00127477	340.2	0.0193497	0.0113172	0.055531	0.032776	0.0066214	0.00345265	-0.00206959	0.00178811	0.276504	0.277396	0.130502	0.0866992	256.6	0.001887	0.001796	0.048009	0.02573	0.022001	0.009047	0.087768	0.069655	442.21	0.019104	0.015674	0.035455
352.94	0.141186	0.145288	0.674488	0.688274	0.00381229	0.00384837	0.0268071	0.0282428	0.00572844	0.00612717	0.0590466	0.0617666	0.344057	0.354678	836.8	0.00791861	0.00394467	0.0568244	0.0326151	0.0269154	0.010438	0.0059751	0.0012901	340.4	0.0199412	0.0114506	0.0565079	0.0331523	0.00702935	0.00349372	-0.00159523	0.00180944	0.277959	0.279669	0.131828	0.087617	256.8	0.001851	0.001818	0.048466	0.026021	0.022141	0.009153	0.088114	0.070356	442.41	0.018278	0.015829	0.035822
353.14	0.141016	0.145477	0.674131	0.688305	0.0032162	0.00385565	0.02671	0.0282943	0.00528378	0.00613865	0.0586403	0.0618702	0.343629	0.354887	837	0.0073321	0.00399151	0.0572215	0.0329988	0.0265052	0.0105617	0.00597932	0.00130543	340.6	0.0194908	0.011584	0.0567887	0.0335281	0.00667073	0.00353478	-0.00173683	0.00183077	0.27924	0.281923	0.132204	0.0885319	257	0.002233	0.001839	0.048736	0.026311	0.021788	0.009259	0.087837	0.071054	442.61	0.017776	0.015984	0.035672
353.34	0.14117	0.145659	0.673948	0.688333	0.00279746	0.00386267	0.0268068	0.0283439	0.0050261	0.00614973	0.0582252	0.06197	0.343541	0.355085	837.2	0.00730357	0.00403835	0.0577534	0.0333824	0.0266152	0.0106853	0.00635304	0.00132076	340.8	0.0193759	0.0117173	0.0571759	0.0339036	0.00729471	0.00357582	-0.00159595	0.00185209	0.280249	0.284157	0.133165	0.0894441	257.2	0.002315	0.00186	0.049108	0.026602	0.021813	0.009366	0.087838	0.07175	442.81	0.017281	0.016139	0.035517
353.54	0.14105	0.145833	0.673904	0.688358	0.00236323	0.00386945	0.0264534	0.0283918	0.00462051	0.00616042	0.0572336	0.0620662	0.343577	0.355273	837.4	0.00732668	0.00408519	0.0590374	0.0337659	0.0269014	0.0108089	0.0064004	0.00133609	341	0.0198117	0.0118506	0.0573435	0.0342786	0.00747686	0.00361686	-0.00152786	0.00187341	0.281875	0.286372	0.134007	0.0903535	257.4	0.002088	0.001882	0.049405	0.026891	0.021516	0.009472	0.088056	0.072442	443.01	0.016823	0.016292	0.035359
353.74	0.141139	0.146	0.673678	0.688382	0.00202663	0.00387599	0.0261282	0.028438	0.00441508	0.00617074	0.0563992	0.0621589	0.344272	0.355451	837.6	0.00748643	0.00413202	0.05952	0.0341493	0.0270312	0.0109325	0.00649436	0.00135142	341.2	0.0197382	0.0119837	0.0574389	0.0346532	0.00731954	0.00365788	-0.00195103	0.00189472	0.28302	0.288568	0.134714	0.0912602	257.6	0.002092	0.001903	0.049468	0.02718	0.021198	0.009578	0.08844	0.073132	443.21	0.017097	0.016445	0.035292
353.94	0.141321	0.14616	0.673202	0.688403	0.00189778	0.00388231	0.025891	0.0284826	0.00408724	0.0061807	0.05574	0.0622481	0.344694	0.35562	837.8	0.00714872	0.00417885	0.05938	0.0345326	0.026996	0.0110562	0.005901	0.00136675	341.4	0.0197887	0.0121168	0.0573995	0.0350273	0.00709096	0.00369888	-0.00210899	0.00191603	0.283858	0.290745	0.135492	0.0921642	257.8	0.002141	0.001924	0.049086	0.027469	0.021404	0.009683	0.088466	0.073819	443.41	0.018335	0.016597	0.034926
354.14	0.141802	0.146314	0.673053	0.688423	0.00213281	0.00388841	0.0253067	0.0285257	0.00407984	0.00619032	0.0556571	0.0623341	0.345119	0.35578	838	0.00773381	0.00422567	0.0598521	0.0349158	0.027259	0.0111797	0.00592555	0.00138208	341.6	0.019969	0.0122498	0.057753	0.0354011	0.00749058	0.00373988	-0.00224746	0.00193733	0.2852	0.292903	0.136458	0.0930654	258	0.002761	0.001946	0.04973	0.027757	0.021508	0.009789	0.089103	0.074503	443.61	0.018133	0.016749	0.034563
354.34	0.141994	0.146462	0.673468	0.68844	0.00215384	0.0038943	0.0250149	0.0285672	0.00414085	0.0061996	0.056114	0.062417	0.345195	0.355931	838.2	0.0082858	0.0042725	0.060467	0.0352989	0.0278979	0.0113033	0.00601849	0.0013974	341.8	0.0203902	0.0123828	0.0582761	0.0357744	0.00769039	0.00378086	-0.00210978	0.00195863	0.28638	0.295043	0.138084	0.093964	258.2	0.003278	0.001967	0.050051	0.028045	0.022048	0.009895	0.089581	0.075184	443.81	0.018387	0.0169	0.034741
354.54	0.142193	0.146603	0.673786	0.688457	0.00212263	0.00389998	0.0249814	0.0286072	0.00425269	0.00620855	0.0566417	0.0624968	0.345522	0.356075	838.4	0.00910674	0.00431932	0.0608551	0.0356819	0.0280903	0.0114269	0.00575501	0.00141273	342	0.0211781	0.0125157	0.0591506	0.0361473	0.0078742	0.00382183	-0.00157285	0.00197992	0.288364	0.297164	0.139222	0.0948598	258.4	0.00351	0.001988	0.050112	0.028333	0.021876	0.010001	0.089912	0.075862	444.01	0.018366	0.01705	0.035032
354.74	0.142271	0.146739	0.674228	0.688472	0.00201913	0.00390547	0.0247226	0.0286458	0.0043481	0.0062172	0.056715	0.0625737	0.345855	0.356211	838.6	0.00909979	0.00436613	0.0613551	0.0360647	0.0282499	0.0115504	0.00607169	0.00142805	342.2	0.0213293	0.0126485	0.0595201	0.0365197	0.00831061	0.00386279	-0.00112582	0.00200121	0.290542	0.299267	0.140089	0.0957529	258.6	0.003824	0.00201	0.049997	0.02862	0.021511	0.010106	0.090022	0.076538	444.21	0.018348	0.0172	0.035422
354.94	0.14207	0.14687	0.674679	0.688485	0.0020682	0.00391076	0.0243072	0.0286831	0.00455257	0.00622555	0.056692	0.0626478	0.346216	0.35634	838.8	0.00908677	0.00441295	0.0615729	0.0364475	0.0283876	0.0116739	0.00577264	0.00144338	342.4	0.0216612	0.0127813	0.0604259	0.0368918	0.00942306	0.00390374	5.9e-07	0.00202249	0.292556	0.301352	0.141384	0.0966433	258.8	0.003357	0.002031	0.049561	0.028906	0.021033	0.010212	0.090066	0.07721	444.41	0.018969	0.017349	0.035701
355.14	0.141825	0.146995	0.674964	0.688498	0.00223687	0.00391588	0.0239869	0.0287191	0.00478262	0.0062336	0.0565623	0.0627192	0.346283	0.356463	839	0.00877709	0.00445976	0.0619712	0.0368302	0.0282299	0.0117974	0.00566952	0.0014587	342.6	0.0221932	0.012914	0.0610966	0.0372634	0.0096538	0.00394467	0.00057822	0.00204377	0.294705	0.303419	0.142673	0.097531	259	0.003515	0.002052	0.050249	0.029193	0.021209	0.010318	0.090263	0.07788	444.61	0.019517	0.017497	0.035438
355.34	0.141574	0.147115	0.674997	0.688509	0.00207933	0.00392081	0.0235203	0.0287538	0.00474689	0.00624137	0.0560642	0.062788	0.345825	0.356579	839.2	0.00836169	0.00450657	0.0622798	0.0372127	0.0283615	0.0119209	0.00538255	0.00147403	342.8	0.0220701	0.0130466	0.060971	0.0376345	0.00879634	0.00398559	0.00058241	0.00206504	0.295874	0.305467	0.143657	0.0984161	259.2	0.003675	0.002074	0.05055	0.029478	0.021273	0.010423	0.091004	0.078548	444.81	0.020251	0.017645	0.035755
355.54	0.14166	0.14723	0.675101	0.688519	0.00167344	0.00392558	0.0228213	0.0287872	0.00462526	0.00624888	0.0559366	0.0628543	0.345487	0.356689	839.4	0.00863843	0.00455338	0.0634683	0.0375952	0.0290837	0.0120444	0.00595885	0.00148935	343	0.0219253	0.0131791	0.0611975	0.0380053	0.00903913	0.0040265	0.00052625	0.00208631	0.297181	0.307499	0.144509	0.0992984	259.4	0.003686	0.002095	0.050642	0.029764	0.021785	0.010528	0.091708	0.079212	445.01	0.020289	0.017791	0.036576
355.74	0.142084	0.147341	0.675424	0.688529	0.00149504	0.00393018	0.02253	0.0288195	0.00462038	0.00625612	0.0564791	0.0629182	0.345337	0.356793	839.6	0.0084979	0.00460018	0.0638222	0.0379775	0.0289113	0.0121679	0.00570828	0.00150467	343.2	0.0225747	0.0133116	0.0616794	0.0383756	0.00920687	0.00406739	0.00072738	0.00210758	0.298778	0.309512	0.145685	0.100178	259.6	0.003739	0.002116	0.050414	0.030049	0.022153	0.010634	0.092099	0.079873	445.21	0.020675	0.017938	0.037377
355.94	0.142668	0.147447	0.676011	0.688538	0.00238523	0.00393462	0.0225827	0.0288507	0.00538394	0.00626311	0.0579099	0.0629797	0.346243	0.356892	839.8	0.00771279	0.00464698	0.0642507	0.0383598	0.0280977	0.0122914	0.00569213	0.00151999	343.4	0.022491	0.013444	0.0622998	0.0387456	0.00963885	0.00410828	0.00119634	0.00212883	0.300931	0.311509	0.146577	0.101055	259.8	0.003361	0.002137	0.050729	0.030333	0.022161	0.010739	0.092571	0.080532	445.41	0.020408	0.018083	0.037075
356.14	0.143533	0.147549	0.67672	0.688546	0.00314622	0.00393891	0.02346	0.0288807	0.00544147	0.00626986	0.0592178	0.063039	0.347327	0.356986	840	0.00804056	0.00469378	0.0650561	0.0387419	0.0283058	0.0124148	0.00577169	0.00153531	343.6	0.0219087	0.0135764	0.0625649	0.0391151	0.00914944	0.00414915	0.00074736	0.00215009	0.301861	0.313488	0.14655	0.10193	260	0.00355	0.002159	0.051122	0.030617	0.02206	0.010844	0.093319	0.081188	445.61	0.020427	0.018228	0.037043
356.34	0.143901	0.147647	0.677356	0.688553	0.00338538	0.00394304	0.0239392	0.0289097	0.00587653	0.00627637	0.0605087	0.0630961	0.348061	0.357075	840.2	0.00808691	0.00474058	0.0653321	0.0391239	0.0282949	0.0125382	0.00606118	0.00155063	343.8	0.0222512	0.0137087	0.0635245	0.0394841	0.00934891	0.00419001	0.00097604	0.00217133	0.303701	0.31545	0.147023	0.102801	260.2	0.00399	0.00218	0.051507	0.030901	0.022547	0.010949	0.09404	0.081842	445.81	0.020335	0.018373	0.037443
356.54	0.143562	0.147741	0.677733	0.688559	0.00339463	0.00394704	0.0241166	0.0289377	0.00612704	0.00628266	0.0612585	0.0631511	0.348313	0.357159	840.4	0.00781932	0.00478737	0.0659109	0.0395058	0.0281898	0.0126616	0.00608642	0.00156595	344	0.0224384	0.0138409	0.0639372	0.0398528	0.00936221	0.00423085	0.00109761	0.00219258	0.305385	0.317395	0.148063	0.103671	260.4	0.004255	0.002201	0.051752	0.031184	0.022592	0.011054	0.094134	0.082492	446.01	0.020025	0.018516	0.036993
356.74	0.142729	0.147831	0.677548	0.688566	0.00308389	0.0039509	0.0241533	0.0289647	0.00568647	0.00628873	0.0613223	0.0632041	0.347878	0.357239	840.6	0.00743961	0.00483416	0.0664069	0.0398876	0.0281874	0.012785	0.00638473	0.00158127	344.2	0.0228464	0.013973	0.0645095	0.040221	0.00950909	0.00427169	0.00107144	0.00221381	0.306253	0.319323	0.148717	0.104537	260.6	0.004374	0.002222	0.051844	0.031467	0.022644	0.011159	0.09488	0.08314	446.21	0.020205	0.018659	0.03743
356.94	0.142493	0.147917	0.677298	0.688571	0.00268998	0.00395462	0.024362	0.0289907	0.00514239	0.00629459	0.0610859	0.0632552	0.347739	0.357314	840.8	0.00752457	0.00488094	0.0669084	0.0402694	0.0284332	0.0129084	0.00652101	0.00159659	344.4	0.0230693	0.0141051	0.0647176	0.0405888	0.00976018	0.00431251	0.00137892	0.00223505	0.307663	0.321235	0.149992	0.105401	260.8	0.004375	0.002244	0.052472	0.031749	0.022654	0.011264	0.095482	0.083786	446.41	0.020244	0.018802	0.037753
357.14	0.142962	0.148	0.677458	0.688576	0.00248898	0.00395821	0.0248954	0.0290158	0.00491095	0.00630024	0.0608224	0.0633044	0.34814	0.357386	841	0.00693823	0.00492773	0.0670066	0.040651	0.0280888	0.0130318	0.00608624	0.0016119	344.6	0.0231565	0.0142371	0.0653716	0.0409562	0.0102574	0.00435332	0.00137629	0.00225627	0.308884	0.32313	0.15093	0.106262	261	0.004693	0.002265	0.052948	0.032031	0.022979	0.011369	0.096257	0.084428	446.61	0.020673	0.018944	0.038027
357.34	0.143444	0.148079	0.677832	0.688581	0.00243569	0.00396168	0.0253563	0.0290401	0.00476252	0.0063057	0.0605561	0.0633518	0.348781	0.357454	841.2	0.00689853	0.00497451	0.0672333	0.0410325	0.0282833	0.0131552	0.00562492	0.00162722	344.8	0.0229696	0.014369	0.0653732	0.0413232	0.00998703	0.00439411	0.00149489	0.0022775	0.310029	0.325009	0.151919	0.107121	261.2	0.004094	0.002286	0.052674	0.032313	0.022944	0.011474	0.096602	0.085068	446.81	0.020565	0.019085	0.037831
357.54	0.144048	0.148156	0.678206	0.688585	0.00256049	0.00396503	0.0256742	0.0290635	0.00477388	0.00631096	0.060174	0.0633975	0.349591	0.357519	841.4	0.00685349	0.00502129	0.0677188	0.0414139	0.0285394	0.0132785	0.00525836	0.00164254	345	0.0232923	0.0145009	0.0655148	0.0416898	0.00972233	0.0044349	0.00153422	0.00229872	0.311532	0.326872	0.153031	0.107977	261.4	0.004522	0.002307	0.053591	0.032594	0.023342	0.011579	0.097457	0.085706	447.01	0.020015	0.019225	0.038427
357.74	0.144302	0.148229	0.678431	0.688589	0.00267917	0.00396827	0.0262726	0.029086	0.0042625	0.00631605	0.0603202	0.0634415	0.350217	0.35758	841.6	0.00699442	0.00506806	0.0679336	0.0417951	0.0288634	0.0134018	0.00502101	0.00165785	345.2	0.0232317	0.0146327	0.0659645	0.0420559	0.00941632	0.00447567	0.00124794	0.00231993	0.312664	0.328718	0.153602	0.108831	261.6	0.004711	0.002328	0.054447	0.032874	0.02349	0.011683	0.098689	0.08634	447.21	0.019039	0.019365	0.038748
357.94	0.14387	0.148299	0.678619	0.688592	0.00250294	0.00397139	0.0263636	0.0291078	0.00385946	0.00632095	0.0605123	0.0634839	0.350212	0.357637	841.8	0.00741089	0.00511484	0.06812	0.0421763	0.0292854	0.0135252	0.00462302	0.00167317	345.4	0.0233602	0.0147645	0.0667152	0.0424216	0.0095908	0.00451643	0.00118714	0.00234114	0.313753	0.330549	0.154704	0.109682	261.8	0.004703	0.00235	0.054684	0.033155	0.023749	0.011788	0.099346	0.086972	447.41	0.019093	0.019505	0.038797
358.14	0.14391	0.148366	0.679329	0.688596	0.00226558	0.0039744	0.026598	0.0291288	0.00396587	0.00632569	0.0608769	0.0635248	0.350853	0.357692	842	0.0085732	0.00516161	0.0689696	0.0425574	0.0297875	0.0136485	0.00486346	0.00168848	345.6	0.0233677	0.0148961	0.0671825	0.042787	0.00969945	0.00455717	0.00106847	0.00236234	0.315278	0.332364	0.155611	0.11053	262	0.005423	0.002371	0.056225	0.033434	0.024086	0.011893	0.100023	0.087602	447.61	0.019345	0.019643	0.039232
358.34	0.143818	0.148431	0.680094	0.688599	0.00215994	0.00397731	0.027055	0.0291491	0.00419684	0.00633026	0.0613695	0.0635642	0.351343	0.357744	842.2	0.00891498	0.00520837	0.0694926	0.0429384	0.0304659	0.0137717	0.00549615	0.00170379	345.8	0.0239954	0.0150277	0.0680766	0.0431518	0.0102161	0.00459791	0.00136105	0.00238354	0.316794	0.334163	0.156862	0.111376	262.2	0.00561	0.002392	0.056674	0.033714	0.024697	0.011997	0.10049	0.088228	447.81	0.019195	0.019781	0.039455
358.54	0.143754	0.148493	0.68057	0.688601	0.00192948	0.00398012	0.0271904	0.0291686	0.00412905	0.00633467	0.0615639	0.0636021	0.351477	0.357794	842.4	0.0093417	0.00525514	0.0705405	0.0433192	0.0310579	0.013895	0.00634197	0.00171911	346	0.0242625	0.0151593	0.068267	0.0435163	0.0099104	0.00463863	0.001089	0.00240473	0.317994	0.335947	0.157537	0.112219	262.4	0.005245	0.002413	0.056592	0.033993	0.023894	0.012102	0.10029	0.088853	448.01	0.019259	0.019919	0.040303
358.74	0.143735	0.148553	0.681113	0.688604	0.00190697	0.00398283	0.0273123	0.0291875	0.00400719	0.00633893	0.0615617	0.0636386	0.351621	0.357841	842.6	0.00937469	0.0053019	0.07166	0.0437	0.0313503	0.0140183	0.00660318	0.00173442	346.2	0.0241341	0.0152907	0.0680915	0.0438804	0.0100297	0.00467934	0.00046143	0.00242592	0.319474	0.337715	0.158454	0.11306	262.6	0.005562	0.002434	0.056745	0.034271	0.023968	0.012206	0.100376	0.089474	448.21	0.020061	0.020055	0.040906
358.94	0.14382	0.14861	0.681646	0.688606	0.0021701	0.00398545	0.0275898	0.0292057	0.00401346	0.00634304	0.0615955	0.0636739	0.351751	0.357885	842.8	0.00866616	0.00534866	0.0717064	0.0440806	0.0310409	0.0141415	0.00623088	0.00174973	346.4	0.0243731	0.0154221	0.0679304	0.044244	0.00995151	0.00472004	3.07e-05	0.0024471	0.320385	0.339468	0.159523	0.113898	262.8	0.005199	0.002455	0.05727	0.034549	0.024248	0.01231	0.100331	0.090093	448.41	0.020483	0.020192	0.041655
359.14	0.143736	0.148665	0.681544	0.688608	0.00211154	0.00398797	0.0275218	0.0292232	0.00367183	0.00634701	0.0612587	0.0637078	0.351033	0.357927	843	0.00816349	0.00539541	0.0724589	0.0444612	0.0312342	0.0142647	0.00617719	0.00176504	346.6	0.0246506	0.0155535	0.0684531	0.0446073	0.0103286	0.00476072	1.58e-05	0.00246828	0.321837	0.341206	0.160604	0.114734	263	0.005388	0.002477	0.058039	0.034827	0.024277	0.012415	0.100674	0.09071	448.61	0.020878	0.020327	0.041238
359.34	0.143539	0.148717	0.681434	0.68861	0.0017687	0.00399041	0.0273586	0.0292401	0.00339019	0.00635084	0.0609905	0.0637405	0.350987	0.357967	843.2	0.00783584	0.00544217	0.0735674	0.0448416	0.0318724	0.014388	0.00632798	0.00178035	346.8	0.024947	0.0156847	0.0686959	0.0449701	0.0100365	0.0048014	-6.062e-05	0.00248945	0.322422	0.342929	0.161447	0.115567	263.2	0.005678	0.002498	0.058618	0.035105	0.024516	0.012519	0.101255	0.091324	448.81	0.02136	0.020462	0.041619
359.54	0.143756	0.148768	0.681318	0.688612	0.00171428	0.00399276	0.0269621	0.0292565	0.00332214	0.00635453	0.0609082	0.0637719	0.350786	0.358004	843.4	0.00775051	0.00548892	0.074301	0.045222	0.0319902	0.0145112	0.00620968	0.00179566	347	0.0250442	0.0158159	0.0693585	0.0453325	0.0111406	0.00484206	-0.00037821	0.00251062	0.323473	0.344637	0.162387	0.116398	263.4	0.00602	0.002519	0.058977	0.035381	0.024742	0.012623	0.101476	0.091935	449.01	0.021277	0.020597	0.042302
359.74	0.1438	0.148816	0.681184	0.688613	0.00188335	0.00399504	0.0269283	0.0292722	0.00344159	0.0063581	0.0609316	0.0638023	0.3506	0.35804	843.6	0.0071001	0.00553566	0.0748256	0.0456022	0.0315637	0.0146344	0.00566113	0.00181097	347.2	0.0254416	0.0159471	0.0702158	0.0456945	0.0111952	0.0048827	-0.00036994	0.00253179	0.325043	0.34633	0.163556	0.117226	263.6	0.006029	0.00254	0.059119	0.035658	0.024562	0.012727	0.101823	0.092544	449.21	0.021275	0.02073	0.042155
359.94	0.143945	0.148863	0.681116	0.688615	0.00261434	0.00399723	0.0269307	0.0292874	0.00381863	0.00636155	0.0612188	0.0638315	0.350979	0.358074	843.8	0.00629523	0.00558241	0.0749819	0.0459823	0.0317028	0.0147575	0.00545985	0.00182628	347.4	0.0256136	0.0160781	0.0704367	0.0460561	0.0114994	0.00492334	-0.00060933	0.00255294	0.326439	0.348009	0.163903	0.118052	263.8	0.006198	0.002561	0.059482	0.035934	0.02467	0.012831	0.102324	0.09315	449.41	0.021488	0.020864	0.041877
360.14	0.144211	0.148907	0.681227	0.688616	0.00323695	0.00399935	0.0277935	0.0293021	0.00402739	0.00636487	0.0616357	0.0638597	0.351355	0.358106	844	0.00630972	0.00562915	0.0756759	0.0463623	0.0321486	0.0148807	0.00528313	0.00184158	347.6	0.0254682	0.0162091	0.0705149	0.0464173	0.011042	0.00496396	-0.00126734	0.0025741	0.326943	0.349673	0.164533	0.118875	264	0.00643	0.002582	0.059754	0.03621	0.025136	0.012935	0.102969	0.093754	449.61	0.021503	0.020996	0.042089
360.34	0.144296	0.14895	0.681296	0.688617	0.00361219	0.00400139	0.028637	0.0293163	0.00485119	0.00636808	0.0621585	0.0638868	0.351938	0.358137	844.2	0.00621314	0.00567589	0.0758354	0.0467422	0.0326297	0.0150038	0.00533241	0.00185689	347.8	0.0264469	0.0163401	0.0716845	0.046778	0.0116585	0.00500458	-0.00089536	0.00259525	0.329112	0.351323	0.16567	0.119695	264.2	0.006275	0.002603	0.059674	0.036485	0.025881	0.013039	0.103678	0.094355	449.81	0.021692	0.021128	0.042719
360.54	0.143963	0.148991	0.681226	0.688618	0.00374515	0.00400337	0.0288206	0.0293299	0.00508137	0.00637117	0.0620505	0.0639129	0.351739	0.358166	844.4	0.00635213	0.00572263	0.0763641	0.0471221	0.0329281	0.015127	0.00492798	0.0018722	348	0.0272744	0.0164709	0.0721479	0.0471384	0.0124349	0.00504517	-0.00047533	0.00261639	0.330604	0.352959	0.167081	0.120514	264.4	0.005679	0.002624	0.059249	0.03676	0.025387	0.013142	0.103895	0.094954	450.01	0.022019	0.02126	0.042627
360.74	0.143897	0.149031	0.681193	0.688619	0.0039331	0.00400527	0.0290057	0.0293431	0.0049709	0.00637416	0.0617114	0.0639381	0.351418	0.358193	844.6	0.00666876	0.00576936	0.0770961	0.0475018	0.0336069	0.0152501	0.00493234	0.0018875	348.2	0.0273908	0.0166017	0.0723722	0.0474983	0.0125322	0.00508576	-0.00049112	0.00263753	0.331347	0.35458	0.167707	0.121329	264.6	0.005043	0.002646	0.059186	0.037034	0.025299	0.013246	0.104344	0.09555	450.21	0.022528	0.021391	0.04303
360.94	0.144673	0.149068	0.681403	0.68862	0.00415638	0.00400711	0.029728	0.0293558	0.00560945	0.00637705	0.0617398	0.0639624	0.351742	0.358219	844.8	0.00703697	0.00581609	0.0774497	0.0478814	0.0337048	0.0153732	0.00477123	0.00190281	348.4	0.0278426	0.0167324	0.0734171	0.0478578	0.0130133	0.00512633	0.00049135	0.00265866	0.332937	0.356188	0.169033	0.122143	264.8	0.004365	0.002667	0.058921	0.037308	0.024801	0.01335	0.104606	0.096144	450.41	0.022479	0.021521	0.042997
361.14	0.1452	0.149105	0.681857	0.688621	0.00492484	0.00400889	0.0304163	0.0293681	0.00646507	0.00637983	0.0619018	0.0639858	0.352187	0.358244	845	0.00697289	0.00586282	0.0774034	0.0482609	0.0333472	0.0154963	0.00463779	0.00191811	348.6	0.0274819	0.0168631	0.074007	0.0482169	0.0130809	0.0051669	0.00072245	0.00267979	0.33423	0.357781	0.168875	0.122953	265	0.003899	0.002688	0.05869	0.037582	0.024874	0.013453	0.105039	0.096735	450.61	0.022645	0.021651	0.043031
361.34	0.145895	0.149139	0.682396	0.688622	0.00521494	0.0040106	0.0307437	0.0293799	0.00690694	0.00638252	0.0619522	0.0640083	0.352512	0.358267	845.2	0.00688124	0.00590954	0.0774379	0.0486403	0.0333442	0.0156194	0.00440855	0.00193341	348.8	0.0276565	0.0169937	0.0740519	0.0485756	0.0129346	0.00520745	0.00095238	0.00270092	0.335045	0.359361	0.169164	0.123762	265.2	0.003335	0.002709	0.058449	0.037855	0.024801	0.013557	0.105313	0.097324	450.81	0.022101	0.02178	0.042492
361.54	0.146139	0.149173	0.682636	0.688622	0.00516686	0.00401226	0.0306709	0.0293913	0.00697328	0.00638512	0.061851	0.06403	0.352379	0.358289	845.4	0.00763979	0.00595626	0.0784076	0.0490195	0.0339029	0.0157424	0.00531384	0.00194872	349	0.0282101	0.0171242	0.0749848	0.0489339	0.0134258	0.00524798	0.00120499	0.00272203	0.33642	0.360928	0.170346	0.124568	265.4	0.003524	0.00273	0.059286	0.038128	0.025329	0.013661	0.106135	0.09791	451.01	0.022041	0.021908	0.043057
361.74	0.146102	0.149205	0.683048	0.688623	0.00518869	0.00401385	0.0305359	0.0294023	0.00673303	0.00638762	0.0622739	0.0640509	0.352386	0.35831	845.6	0.00834767	0.00600298	0.079305	0.0493987	0.0341883	0.0158655	0.00588378	0.00196402	349.2	0.0283845	0.0172547	0.0758844	0.0492918	0.0130889	0.00528851	0.00112445	0.00274315	0.337662	0.36248	0.170662	0.125371	265.6	0.003323	0.002751	0.059804	0.0384	0.025515	0.013764	0.106674	0.098494	451.21	0.02194	0.022036	0.04259
361.94	0.146065	0.149236	0.683241	0.688624	0.00533531	0.0040154	0.0302636	0.029413	0.0071632	0.00639004	0.0630775	0.0640711	0.352886	0.35833	845.8	0.00907247	0.0060497	0.0792691	0.0497778	0.0341952	0.0159885	0.00631608	0.00197932	349.4	0.028424	0.0173851	0.0763432	0.0496493	0.0129673	0.00532902	0.00103379	0.00276426	0.338782	0.36402	0.171721	0.126172	265.8	0.003045	0.002772	0.059619	0.038672	0.025519	0.013867	0.106581	0.099076	451.41	0.022329	0.022164	0.042728
362.14	0.14637	0.149265	0.683326	0.688624	0.00553338	0.00401689	0.0303142	0.0294232	0.0073921	0.00639237	0.0639212	0.0640905	0.353419	0.358349	846	0.00995196	0.00609641	0.0798354	0.0501568	0.0342631	0.0161115	0.00708628	0.00199462	349.6	0.0286337	0.0175154	0.0766849	0.0500064	0.0124945	0.00536952	0.00110896	0.00278536	0.3398	0.365546	0.171991	0.126971	266	0.003023	0.002793	0.059884	0.038944	0.025281	0.013971	0.10678	0.099655	451.61	0.022509	0.02229	0.043212
362.34	0.146856	0.149294	0.683923	0.688625	0.00599447	0.00401832	0.030424	0.0294331	0.00787351	0.00639462	0.064797	0.0641092	0.353767	0.358367	846.2	0.010601	0.00614312	0.0807146	0.0505356	0.0347195	0.0162345	0.0077629	0.00200992	349.8	0.0288425	0.0176457	0.0771597	0.0503631	0.0122549	0.00541001	0.00092319	0.00280646	0.341194	0.367059	0.173391	0.127767	266.2	0.002671	0.002814	0.059875	0.039215	0.025352	0.014074	0.106833	0.100232	451.81	0.022404	0.022417	0.043222
362.54	0.147047	0.149321	0.684161	0.688625	0.00600498	0.00401971	0.0303154	0.0294427	0.00774974	0.00639679	0.0652633	0.0641272	0.353577	0.358383	846.4	0.0109353	0.00618983	0.0819695	0.0509144	0.0356054	0.0163575	0.00860307	0.00202522	350	0.0287506	0.0177759	0.077406	0.0507193	0.0115069	0.00545048	0.00046157	0.00282756	0.342087	0.368559	0.174198	0.128561	266.4	0.00248	0.002835	0.060183	0.039486	0.025419	0.014177	0.106937	0.100806	452.01	0.022702	0.022542	0.043849
362.74	0.146628	0.149347	0.684156	0.688625	0.0058393	0.00402105	0.0297425	0.0294519	0.00728512	0.00639889	0.0651228	0.0641446	0.353346	0.358399	846.6	0.010475	0.00623654	0.0823631	0.051293	0.035542	0.0164805	0.0079318	0.00204052	350.2	0.0286767	0.017906	0.0774894	0.0510752	0.0112372	0.00549095	7.618e-05	0.00284864	0.342747	0.370046	0.175084	0.129353	266.6	0.002505	0.002856	0.061163	0.039756	0.02556	0.01428	0.106913	0.101378	452.21	0.022898	0.022667	0.044143
362.94	0.146043	0.149372	0.683633	0.688626	0.00551425	0.00402234	0.0294471	0.0294607	0.00664445	0.00640092	0.064338	0.0641613	0.352632	0.358415	846.8	0.0105034	0.00628324	0.0829405	0.0516716	0.0358183	0.0166034	0.00820173	0.00205582	350.4	0.0286071	0.0180361	0.0780623	0.0514307	0.0111233	0.0055314	0.00049504	0.00286973	0.343899	0.37152	0.175969	0.130142	266.8	0.002592	0.002877	0.061995	0.040026	0.025758	0.014383	0.106578	0.101948	452.41	0.022964	0.022792	0.043986
363.14	0.145717	0.149396	0.682965	0.688626	0.00514567	0.00402359	0.0290921	0.0294693	0.0062484	0.00640287	0.0631787	0.0641774	0.351604	0.358429	847	0.0102187	0.00632994	0.0839297	0.05205	0.036258	0.0167264	0.0079488	0.00207112	350.6	0.0290044	0.018166	0.0786209	0.0517857	0.0113285	0.00557184	0.00090171	0.00289081	0.344979	0.372981	0.176703	0.130928	267	0.002969	0.002898	0.062949	0.040296	0.025636	0.014486	0.107189	0.102515	452.61	0.023525	0.022916	0.043537
363.34	0.145662	0.149419	0.683063	0.688626	0.00493574	0.0040248	0.0292286	0.0294776	0.00656856	0.00640476	0.06291	0.0641929	0.352013	0.358443	847.2	0.0101731	0.00637664	0.0846239	0.0524284	0.0365505	0.0168493	0.0079447	0.00208641	350.8	0.0291139	0.018296	0.0790117	0.0521404	0.0109208	0.00561226	0.00102662	0.00291188	0.346107	0.37443	0.177557	0.131713	267.2	0.003797	0.002919	0.064073	0.040565	0.025943	0.014589	0.108416	0.10308	452.81	0.024326	0.02304	0.043544
363.54	0.145659	0.149441	0.682976	0.688627	0.0047836	0.00402596	0.0290774	0.0294855	0.00674975	0.00640658	0.0622864	0.0642079	0.351582	0.358456	847.4	0.0103522	0.00642333	0.0850416	0.0528066	0.0369186	0.0169722	0.00790874	0.00210171	351	0.0289287	0.0184258	0.0790067	0.0524946	0.0107738	0.00565268	0.00058156	0.00293295	0.347014	0.375866	0.178022	0.132495	267.4	0.00383	0.00294	0.064035	0.040834	0.026113	0.014692	0.108906	0.103643	453.01	0.024488	0.023163	0.044147
363.74	0.145282	0.149462	0.682652	0.688627	0.00443787	0.00402708	0.0290346	0.0294932	0.00657107	0.00640833	0.0615965	0.0642223	0.35124	0.358468	847.6	0.0102527	0.00647002	0.0858918	0.0531847	0.0375953	0.0170951	0.00799725	0.002117	351.2	0.0287301	0.0185556	0.0793628	0.0528484	0.0101205	0.00569308	0.00051158	0.00295402	0.347904	0.37729	0.178368	0.133274	267.6	0.004133	0.002961	0.064221	0.041102	0.026181	0.014795	0.10953	0.104203	453.21	0.024811	0.023285	0.043982
363.94	0.144912	0.149483	0.682297	0.688627	0.00406007	0.00402817	0.0289919	0.0295007	0.00619126	0.00641003	0.061223	0.0642362	0.351182	0.35848	847.8	0.0100328	0.00651671	0.0862249	0.0535628	0.037915	0.017218	0.00763146	0.0021323	351.4	0.0285601	0.0186854	0.0794578	0.0532019	0.0100899	0.00573347	0.00051403	0.00297508	0.349004	0.378702	0.178915	0.134052	267.8	0.004847	0.002982	0.06421	0.04137	0.026922	0.014897	0.109969	0.104761	453.41	0.024792	0.023407	0.044328
364.14	0.144725	0.149502	0.682234	0.688627	0.00384918	0.00402921	0.0293842	0.0295078	0.00616223	0.00641167	0.0613293	0.0642496	0.351246	0.358491	848	0.0101491	0.0065634	0.0871656	0.0539407	0.0385116	0.0173409	0.0074693	0.00214759	351.6	0.0281768	0.018815	0.0794134	0.0535549	0.0101323	0.00577385	0.00050374	0.00299613	0.350043	0.380101	0.179297	0.134827	268	0.004831	0.003003	0.064406	0.041637	0.026823	0.015	0.110066	0.105316	453.61	0.024754	0.023528	0.044476
364.34	0.144463	0.149521	0.682058	0.688628	0.00358582	0.00403022	0.0298632	0.0295147	0.00617142	0.00641325	0.0613128	0.0642625	0.351141	0.358501	848.2	0.00984988	0.00661008	0.0872106	0.0543185	0.039303	0.0174638	0.00729684	0.00216289	351.8	0.0287261	0.0189446	0.0798732	0.0539075	0.0106265	0.00581421	0.00081551	0.00301718	0.351416	0.381489	0.179993	0.135599	268.2	0.005052	0.003024	0.064473	0.041905	0.027027	0.015103	0.110533	0.10587	453.81	0.024509	0.023649	0.044922
364.54	0.144067	0.149539	0.681915	0.688628	0.003215	0.0040312	0.030063	0.0295214	0.00616948	0.00641477	0.0604426	0.0642749	0.350982	0.358511	848.4	0.00978804	0.00665676	0.0880296	0.0546962	0.0392457	0.0175866	0.00681366	0.00217818	352	0.0289098	0.0190742	0.0798353	0.0542598	0.0110446	0.00585457	0.00082891	0.00303823	0.352521	0.382864	0.181178	0.136369	268.4	0.004671	0.003045	0.064272	0.042171	0.026715	0.015205	0.110771	0.106421	454.01	0.024016	0.023769	0.044984
364.74	0.143901	0.149556	0.682102	0.688628	0.00307675	0.00403214	0.0301831	0.0295278	0.00611114	0.00641625	0.0597861	0.0642869	0.350987	0.35852	848.6	0.0100911	0.00670343	0.0891916	0.0550738	0.0401497	0.0177095	0.00723507	0.00219347	352.2	0.0287165	0.0192036	0.0801004	0.0546116	0.0109043	0.00589491	0.00076549	0.00305927	0.353359	0.384228	0.181794	0.137137	268.6	0.004407	0.003066	0.064195	0.042438	0.026587	0.015308	0.111255	0.106969	454.21	0.024274	0.023889	0.044829
364.94	0.144168	0.149573	0.682469	0.688628	0.00295774	0.00403305	0.0307953	0.029534	0.00660236	0.00641767	0.060275	0.0642984	0.351359	0.358529	848.8	0.0103957	0.00675011	0.0898587	0.0554513	0.040329	0.0178323	0.00740015	0.00220876	352.4	0.0290985	0.019333	0.0807803	0.054963	0.011197	0.00593524	0.00122384	0.0030803	0.354391	0.38558	0.182714	0.137903	268.8	0.004555	0.003087	0.064061	0.042704	0.026267	0.01541	0.111744	0.107516	454.41	0.024387	0.024008	0.044838
365.14	0.144479	0.149589	0.682941	0.688628	0.003345	0.00403392	0.0308135	0.02954	0.00693811	0.00641904	0.0604523	0.0643095	0.351784	0.358538	849	0.0103221	0.00679678	0.0901979	0.0558287	0.0402287	0.0179551	0.00736965	0.00222406	352.6	0.0297943	0.0194623	0.0812598	0.055314	0.01178	0.00597555	0.00097844	0.00310133	0.355926	0.38692	0.183497	0.138666	269	0.004644	0.003108	0.064267	0.042969	0.026154	0.015512	0.11183	0.10806	454.61	0.024446	0.024127	0.044956
365.34	0.144993	0.149604	0.683162	0.688628	0.00294586	0.00403477	0.0306359	0.0295458	0.00706079	0.00642036	0.0602944	0.0643202	0.351784	0.358546	849.2	0.0102345	0.00684345	0.0904736	0.056206	0.0402122	0.0180779	0.00697432	0.00223935	352.8	0.0303671	0.0195916	0.0812968	0.0556647	0.012111	0.00601586	0.0010538	0.00312236	0.356268	0.388248	0.184925	0.139427	269.2	0.005	0.003129	0.06416	0.043234	0.026336	0.015615	0.112203	0.108602	454.81	0.024474	0.024245	0.045207
365.54	0.144756	0.149618	0.682971	0.688629	0.00258847	0.00403559	0.0301168	0.0295514	0.00679855	0.00642164	0.0602656	0.0643305	0.351864	0.358553	849.4	0.0105167	0.00689012	0.0909663	0.0565832	0.040131	0.0182007	0.00727405	0.00225464	353	0.0304421	0.0197208	0.0815242	0.0560149	0.0121934	0.00605615	0.00101408	0.00314338	0.357735	0.389565	0.185919	0.140186	269.4	0.005058	0.00315	0.064456	0.043499	0.026748	0.015717	0.112428	0.109141	455.01	0.024758	0.024362	0.045809
365.74	0.144821	0.149632	0.682942	0.688629	0.00260044	0.00403638	0.0299135	0.0295567	0.00680128	0.00642287	0.0607929	0.0643404	0.352598	0.358561	849.6	0.0107665	0.00693678	0.0911505	0.0569603	0.0396278	0.0183234	0.00707161	0.00226992	353.2	0.0307831	0.0198499	0.0817285	0.0563647	0.0121534	0.00609643	0.00116959	0.00316439	0.358932	0.390871	0.186503	0.140942	269.6	0.005579	0.003171	0.064948	0.043763	0.026931	0.015819	0.112859	0.109679	455.21	0.024976	0.024479	0.04565
365.94	0.144897	0.149646	0.68278	0.688629	0.00252726	0.00403714	0.0298333	0.0295619	0.00691668	0.00642406	0.0612607	0.06435	0.353008	0.358567	849.8	0.0108109	0.00698344	0.0911088	0.0573373	0.0390599	0.0184462	0.00664169	0.00228521	353.4	0.0304786	0.019979	0.0819621	0.0567141	0.0122869	0.00613669	0.00075224	0.0031854	0.359776	0.392166	0.18722	0.141696	269.8	0.005172	0.003192	0.064857	0.044027	0.026475	0.015921	0.112981	0.110214	455.41	0.025772	0.024596	0.046388
366.14	0.145011	0.149659	0.682862	0.688629	0.0023776	0.00403788	0.029393	0.0295669	0.00668006	0.00642521	0.0613105	0.0643592	0.352967	0.358574	850	0.0115211	0.0070301	0.0921041	0.0577141	0.0392368	0.0185689	0.00648563	0.0023005	353.6	0.0306978	0.020108	0.083002	0.0570632	0.0124523	0.00617695	0.00069523	0.00320641	0.360916	0.393449	0.187962	0.142448	270	0.005161	0.003213	0.065314	0.044291	0.026597	0.016023	0.113103	0.110747	455.61	0.025664	0.024712	0.046545
366.34	0.144974	0.149671	0.683388	0.688629	0.00263071	0.00403859	0.0288237	0.0295718	0.00652814	0.00642632	0.061507	0.0643681	0.35318	0.35858	850.2	0.0118023	0.00707675	0.0929874	0.0580909	0.0396237	0.0186916	0.00626313	0.00231579	353.8	0.0306607	0.0202369	0.0832596	0.0574118	0.0120221	0.00621719	0.00020243	0.00322741	0.361561	0.394721	0.188611	0.143198	270.2	0.005342	0.003234	0.065646	0.044554	0.026947	0.016125	0.113508	0.111278	455.81	0.026325	0.024827	0.047251
366.54	0.144547	0.149683	0.683041	0.688629	0.00253559	0.00403927	0.028416	0.0295764	0.0062515	0.00642739	0.061459	0.0643767	0.35276	0.358586	850.4	0.0118379	0.0071234	0.0933798	0.0584676	0.0402685	0.0188143	0.00645753	0.00233107	354	0.0307161	0.0203658	0.0838377	0.05776	0.011776	0.00625742	-0.00025966	0.00324841	0.361991	0.395982	0.188891	0.143945	270.4	0.005422	0.003255	0.06639	0.044817	0.027277	0.016227	0.113774	0.111806	456.01	0.026899	0.024942	0.048049
366.74	0.144321	0.149695	0.682947	0.688629	0.00260725	0.00403993	0.0277772	0.0295809	0.00569809	0.00642843	0.0614218	0.0643849	0.352283	0.358591	850.6	0.0115769	0.00717005	0.0934864	0.0588441	0.0396928	0.018937	0.00609465	0.00234636	354.2	0.0303887	0.0204946	0.0837831	0.0581079	0.0112698	0.00629764	-0.00088288	0.0032694	0.362156	0.397233	0.18902	0.14469	270.6	0.005077	0.003275	0.066471	0.045079	0.026987	0.016329	0.113688	0.112333	456.21	0.02736	0.025057	0.048804
366.94	0.144905	0.149706	0.682954	0.688629	0.0029501	0.00404057	0.0281951	0.0295853	0.00565588	0.00642942	0.0617591	0.0643929	0.352101	0.358597	850.8	0.0121218	0.0072167	0.0940245	0.0592206	0.039922	0.0190597	0.00614874	0.00236164	354.4	0.0305487	0.0206233	0.0841621	0.0584553	0.0109577	0.00633785	-0.00036405	0.00329038	0.363443	0.398472	0.189919	0.145433	270.8	0.005738	0.003296	0.067119	0.045341	0.027552	0.016431	0.114611	0.112857	456.41	0.028253	0.025171	0.049022
367.14	0.14564	0.149716	0.683495	0.688629	0.00341796	0.00404119	0.0283218	0.0295894	0.00597243	0.00643039	0.0623673	0.0644005	0.352361	0.358601	851	0.0118448	0.00726334	0.0939364	0.059597	0.0395603	0.0191824	0.00558793	0.00237693	354.6	0.0311905	0.020752	0.0848593	0.0588024	0.0111713	0.00637804	-7.679e-05	0.00331136	0.364108	0.399701	0.189988	0.146174	271	0.005915	0.003317	0.06713	0.045603	0.027479	0.016533	0.115138	0.113379	456.61	0.028555	0.025284	0.049147
367.34	0.145951	0.149726	0.684383	0.688629	0.00384723	0.00404178	0.0283972	0.0295935	0.00616546	0.00643132	0.0630591	0.0644079	0.35303	0.358606	851.2	0.0122533	0.00730998	0.094031	0.0599732	0.039391	0.019305	0.00602719	0.00239221	354.8	0.0305938	0.0208806	0.0850619	0.059149	0.0106152	0.00641822	-0.00012203	0.00333234	0.364597	0.40092	0.189925	0.146912	271.2	0.006139	0.003338	0.06747	0.045864	0.027832	0.016634	0.115687	0.113899	456.81	0.02797	0.025397	0.048682
367.54	0.14598	0.149736	0.684791	0.688629	0.00404326	0.00404236	0.0283236	0.0295974	0.00607062	0.00643221	0.0627807	0.064415	0.353093	0.358611	851.4	0.0123815	0.00735662	0.0942024	0.0603494	0.0389761	0.0194277	0.00571723	0.0024075	355	0.0303394	0.0210091	0.085153	0.0594953	0.0099221	0.00645839	-0.00035191	0.00335331	0.36491	0.402127	0.18983	0.147648	271.4	0.006209	0.003359	0.067101	0.046125	0.027963	0.016736	0.115543	0.114416	457.01	0.027721	0.02551	0.04901
367.74	0.145953	0.149745	0.684806	0.688629	0.00396959	0.00404291	0.0281313	0.0296011	0.00593813	0.00643308	0.0621294	0.0644219	0.352947	0.358615	851.6	0.0125992	0.00740325	0.0951327	0.0607254	0.0391837	0.0195503	0.00595032	0.00242278	355.2	0.0299384	0.0211376	0.0857194	0.0598412	0.00984975	0.00649855	-0.00038613	0.00337428	0.36536	0.403325	0.190007	0.148382	271.6	0.006564	0.00338	0.066834	0.046385	0.028183	0.016837	0.116162	0.114932	457.21	0.027722	0.025621	0.048651
367.94	0.146163	0.149754	0.68496	0.688629	0.00409122	0.00404345	0.0280339	0.0296047	0.0059366	0.00643391	0.0615621	0.0644284	0.352946	0.358619	851.8	0.0129279	0.00744989	0.0955495	0.0611013	0.0393831	0.0196729	0.0065944	0.00243806	355.4	0.0296858	0.021266	0.0858572	0.0601866	0.00982615	0.00653869	-0.00046661	0.00339524	0.366151	0.404512	0.190079	0.149114	271.8	0.006914	0.003401	0.066824	0.046645	0.028696	0.016939	0.116287	0.115445	457.41	0.027572	0.025733	0.04861
368.14	0.146376	0.149763	0.68499	0.688629	0.00385591	0.00404397	0.0279318	0.0296082	0.00548897	0.00643472	0.0610217	0.0644348	0.352865	0.358623	852	0.0127021	0.00749652	0.0956421	0.0614772	0.0401487	0.0197955	0.00673452	0.00245334	355.6	0.0299235	0.0213943	0.0864786	0.0605317	0.0103219	0.00657883	-0.00024908	0.00341619	0.367179	0.405689	0.190664	0.149843	272	0.00624	0.003422	0.066662	0.046905	0.028572	0.01704	0.116286	0.115956	457.61	0.027289	0.025844	0.048232
368.34	0.14598	0.149771	0.68464	0.688629	0.00359864	0.00404446	0.0276433	0.0296116	0.00523815	0.0064355	0.0602482	0.0644409	0.352988	0.358626	852.2	0.0130687	0.00754314	0.0961763	0.0618529	0.0405541	0.0199181	0.00707124	0.00246862	355.8	0.0304204	0.0215226	0.0871747	0.0608764	0.0107635	0.00661895	-0.00039738	0.00343715	0.36812	0.406855	0.191492	0.150571	272.2	0.00604	0.003442	0.066424	0.047164	0.02873	0.017142	0.116839	0.116465	457.81	0.026361	0.025954	0.048228
368.54	0.145813	0.149779	0.684544	0.688629	0.0032683	0.00404495	0.0276581	0.0296149	0.00537192	0.00643625	0.0596894	0.0644468	0.352985	0.35863	852.4	0.0132664	0.00758977	0.0967423	0.0622285	0.0405853	0.0200406	0.00739819	0.0024839	356	0.0307962	0.0216508	0.0881123	0.0612207	0.0113548	0.00665906	8.182e-05	0.00345809	0.369526	0.408012	0.19309	0.151296	272.4	0.005846	0.003463	0.066652	0.047423	0.029186	0.017243	0.117434	0.116972	458.01	0.025765	0.026064	0.048045
368.74	0.145806	0.149786	0.684507	0.688629	0.00313752	0.00404541	0.0269425	0.029618	0.00530791	0.00643698	0.0599032	0.0644525	0.352783	0.358633	852.6	0.0135338	0.00763639	0.097354	0.062604	0.041378	0.0201632	0.00793588	0.00249918	356.2	0.0308223	0.021779	0.0887837	0.0615646	0.0115909	0.00669915	0.00025099	0.00347903	0.370474	0.409159	0.193678	0.152019	272.6	0.005687	0.003484	0.066937	0.047682	0.029405	0.017344	0.117661	0.117477	458.21	0.02638	0.026174	0.047567
368.94	0.145855	0.149794	0.684415	0.68863	0.00289808	0.00404586	0.0262826	0.029621	0.00531892	0.00643768	0.0602461	0.064458	0.352724	0.358636	852.8	0.0132398	0.00768301	0.097666	0.0629795	0.0411298	0.0202857	0.00749375	0.00251446	356.4	0.0313796	0.021907	0.0897781	0.0619081	0.0123239	0.00673924	0.00051314	0.00349997	0.372008	0.410295	0.194361	0.152739	272.8	0.005732	0.003505	0.067368	0.04794	0.029221	0.017445	0.117672	0.11798	458.41	0.026413	0.026283	0.047339
369.14	0.146012	0.149801	0.684124	0.68863	0.00261932	0.00404629	0.0253715	0.0296239	0.0054346	0.00643835	0.059837	0.0644633	0.352713	0.358639	853	0.0129636	0.00772962	0.0976636	0.0633548	0.040993	0.0204082	0.00740438	0.00252974	356.6	0.0318212	0.0220351	0.0902709	0.0622512	0.013149	0.00677931	0.00056273	0.0035209	0.373599	0.411422	0.195164	0.153458	273	0.005815	0.003526	0.068186	0.048197	0.029515	0.017547	0.117502	0.118481	458.61	0.025311	0.026391	0.046911
369.34	0.145898	0.149807	0.683654	0.68863	0.00188471	0.00404671	0.0247539	0.0296268	0.00544747	0.006439	0.0594928	0.0644683	0.352273	0.358642	853.2	0.0126991	0.00777623	0.0975921	0.06373	0.0409055	0.0205308	0.0070031	0.00254501	356.8	0.0313527	0.022163	0.0901438	0.0625939	0.0134468	0.00681937	0.00065344	0.00354183	0.374046	0.412539	0.195473	0.154174	273.2	0.005296	0.003547	0.06809	0.048455	0.029227	0.017648	0.118182	0.11898	458.81	0.025118	0.026499	0.046893
369.54	0.145428	0.149814	0.683275	0.68863	0.00105685	0.00404712	0.0241284	0.0296295	0.00500722	0.00643963	0.0594881	0.0644732	0.352036	0.358644	853.4	0.0125917	0.00782284	0.0978326	0.0641051	0.041053	0.0206533	0.00739521	0.00256029	357	0.0317146	0.0222909	0.0907227	0.0629362	0.0140322	0.00685942	0.00075681	0.00356275	0.375971	0.413647	0.195851	0.154888	273.4	0.005092	0.003567	0.068884	0.048712	0.029353	0.017749	0.118919	0.119476	459.01	0.025134	0.026607	0.046512
369.74	0.145103	0.14982	0.683124	0.68863	0.00056927	0.00404751	0.0238254	0.0296321	0.00489763	0.00644024	0.0599242	0.064478	0.351874	0.358647	853.6	0.0126053	0.00786945	0.0983263	0.0644801	0.0414232	0.0207757	0.0078169	0.00257557	357.2	0.0317372	0.0224187	0.0910755	0.0632782	0.014154	0.00689945	0.00023549	0.00358367	0.376744	0.414745	0.196072	0.155601	273.6	0.005016	0.003588	0.068849	0.048968	0.028315	0.01785	0.119107	0.119971	459.21	0.025458	0.026714	0.046524
369.94	0.14491	0.149826	0.68287	0.68863	0.00029217	0.00404788	0.0236535	0.0296346	0.00475684	0.00644083	0.0600506	0.0644825	0.351708	0.358649	853.8	0.0123431	0.00791605	0.0995089	0.064855	0.0419927	0.0208982	0.00817627	0.00259084	357.4	0.0321285	0.0225464	0.091503	0.0636198	0.0141881	0.00693948	-7.867e-05	0.00360458	0.377926	0.415834	0.197124	0.15631	273.8	0.004322	0.003609	0.068591	0.049224	0.027539	0.01795	0.118937	0.120463	459.41	0.026119	0.02682	0.047062
370.14	0.144913	0.149831	0.683214	0.68863	0.00036352	0.00404825	0.0238368	0.0296371	0.00476877	0.00644139	0.0601597	0.0644869	0.351744	0.358651	854	0.0121837	0.00796266	0.0996922	0.0652298	0.0424136	0.0210207	0.00820114	0.00260612	357.6	0.0327598	0.0226741	0.0914073	0.0639609	0.0141159	0.00697949	-0.00041741	0.00362549	0.378729	0.416913	0.197714	0.157018	274	0.004508	0.00363	0.068669	0.04948	0.027262	0.018051	0.119236	0.120954	459.61	0.026215	0.026927	0.047356
370.34	0.144925	0.149837	0.683281	0.68863	0.00101442	0.0040486	0.0244958	0.0296394	0.00516213	0.00644194	0.0606971	0.0644911	0.352207	0.358653	854.2	0.012016	0.00800925	0.100063	0.0656045	0.0424869	0.0211431	0.00841864	0.00262139	357.8	0.0329183	0.0228017	0.0917176	0.0643017	0.0139688	0.00701949	-0.00062252	0.00364639	0.379694	0.417982	0.198453	0.157724	274.2	0.004929	0.003651	0.069216	0.049736	0.026929	0.018152	0.119801	0.121442	459.81	0.027057	0.027032	0.048055
370.54	0.145122	0.149842	0.683274	0.68863	0.00130411	0.00404894	0.0252921	0.0296417	0.00571444	0.00644247	0.0609101	0.0644952	0.352115	0.358655	854.4	0.0117803	0.00805585	0.100463	0.0659791	0.0427752	0.0212655	0.00840226	0.00263666	358	0.032867	0.0229293	0.0921605	0.0646421	0.0139471	0.00705947	-0.00082927	0.00366729	0.380805	0.419043	0.19898	0.158427	274.4	0.004965	0.003671	0.069447	0.049991	0.026716	0.018253	0.120185	0.121928	460.01	0.027399	0.027137	0.048885
370.74	0.145316	0.149847	0.68387	0.68863	0.00157429	0.00404926	0.0260172	0.0296439	0.00567878	0.00644297	0.0615011	0.0644991	0.352401	0.358657	854.6	0.0115317	0.00810244	0.100439	0.0663535	0.0422903	0.0213879	0.00791093	0.00265194	358.2	0.0329589	0.0230568	0.0924661	0.0649821	0.0139346	0.00709945	-0.00070988	0.00368818	0.381963	0.420095	0.19949	0.159129	274.6	0.005192	0.003692	0.069322	0.050245	0.02661	0.018353	0.120823	0.122413	460.21	0.028067	0.027242	0.049386
370.94	0.14528	0.149852	0.684373	0.68863	0.00174097	0.00404958	0.0268168	0.029646	0.00563774	0.00644347	0.0617408	0.0645029	0.352644	0.358659	854.8	0.0116788	0.00814903	0.100799	0.0667279	0.0423089	0.0215103	0.00742323	0.00266721	358.4	0.0337316	0.0231842	0.0931805	0.0653217	0.0143997	0.00713941	0.00052108	0.00370907	0.383053	0.421137	0.200477	0.159828	274.8	0.005534	0.003713	0.070127	0.0505	0.02682	0.018454	0.121125	0.122895	460.41	0.028542	0.027346	0.049331
371.14	0.145155	0.149856	0.685178	0.68863	0.00198961	0.00404988	0.027408	0.0296481	0.00556043	0.00644394	0.0616804	0.0645065	0.352877	0.358661	855	0.0115254	0.00819562	0.100778	0.0671022	0.0418401	0.0216327	0.0073697	0.00268248	358.6	0.0343317	0.0233116	0.0937886	0.0656609	0.014462	0.00717936	0.00067663	0.00372995	0.383764	0.42217	0.200718	0.160525	275	0.005303	0.003734	0.070017	0.050754	0.026952	0.018554	0.121152	0.123375	460.61	0.028261	0.02745	0.049388
371.34	0.145207	0.149861	0.68609	0.68863	0.00240364	0.00405018	0.0282284	0.02965	0.00572054	0.0064444	0.0615405	0.06451	0.353151	0.358662	855.2	0.0113725	0.0082422	0.100961	0.0674764	0.0413171	0.0217551	0.00732784	0.00269775	358.8	0.0337984	0.0234388	0.093578	0.0659998	0.013579	0.0072193	0.00050106	0.00375083	0.384415	0.423195	0.201353	0.16122	275.2	0.004938	0.003754	0.070484	0.051007	0.027032	0.018655	0.121593	0.123854	460.81	0.02821	0.027553	0.049686
371.54	0.14532	0.149865	0.686666	0.68863	0.00259285	0.00405046	0.028516	0.0296519	0.00606632	0.00644484	0.0610998	0.0645134	0.35315	0.358664	855.4	0.0119686	0.00828879	0.101937	0.0678504	0.0417071	0.0218774	0.00779641	0.00271302	359	0.0340664	0.0235661	0.0940686	0.0663382	0.0134562	0.00725923	0.00093378	0.00377171	0.38547	0.42421	0.202259	0.161913	275.4	0.004887	0.003775	0.070176	0.05126	0.027051	0.018755	0.121791	0.12433	461.01	0.02906	0.027656	0.050442
371.74	0.145943	0.149869	0.687187	0.68863	0.00283122	0.00405073	0.0293129	0.0296538	0.00621089	0.00644527	0.0615304	0.0645166	0.3538	0.358665	855.6	0.0125816	0.00833536	0.103034	0.0682244	0.0423834	0.0219998	0.00789421	0.00272829	359.2	0.0346355	0.0236932	0.0944428	0.0666763	0.0138319	0.00729914	0.00119511	0.00379257	0.386567	0.425217	0.203101	0.162604	275.6	0.004712	0.003796	0.070234	0.051513	0.027823	0.018855	0.122734	0.124804	461.21	0.029149	0.027759	0.050417
371.94	0.146469	0.149873	0.687319	0.68863	0.00281662	0.004051	0.0296184	0.0296555	0.00624149	0.00644568	0.0619176	0.0645198	0.354041	0.358667	855.8	0.0130434	0.00838194	0.103564	0.0685983	0.0425568	0.0221221	0.00786547	0.00274356	359.4	0.0354627	0.0238203	0.0950808	0.067014	0.0143837	0.00733904	0.0017096	0.00381344	0.387557	0.426216	0.204087	0.163293	275.8	0.005002	0.003817	0.070857	0.051765	0.028632	0.018956	0.123213	0.125277	461.41	0.029665	0.027861	0.050808
372.14	0.146414	0.149877	0.687507	0.68863	0.00281473	0.00405125	0.0300111	0.0296572	0.00646349	0.00644607	0.0628579	0.0645228	0.354605	0.358668	856	0.0131117	0.00842851	0.103656	0.068972	0.0423839	0.0222444	0.00717194	0.00275883	359.6	0.0360559	0.0239473	0.0957906	0.0673513	0.0148419	0.00737893	0.00214961	0.0038343	0.388758	0.427205	0.205723	0.16398	276	0.004858	0.003837	0.070962	0.052017	0.028959	0.019056	0.123726	0.125747	461.61	0.029122	0.027962	0.050954
372.34	0.146045	0.14988	0.687274	0.68863	0.00279433	0.0040515	0.0300171	0.0296589	0.00684791	0.00644646	0.0634756	0.0645257	0.354889	0.358669	856.2	0.013761	0.00847508	0.104478	0.0693457	0.042452	0.0223667	0.00730548	0.00277409	359.8	0.0362422	0.0240743	0.0957952	0.0676882	0.0148584	0.00741881	0.00176759	0.00385515	0.389484	0.428186	0.206164	0.164664	276.2	0.005218	0.003858	0.071207	0.052269	0.029022	0.019156	0.124235	0.126216	461.81	0.028938	0.028063	0.051289
372.54	0.146328	0.149884	0.687	0.68863	0.00261238	0.00405174	0.0299755	0.0296605	0.00686663	0.00644683	0.0637465	0.0645285	0.354733	0.35867	856.4	0.0133012	0.00852165	0.104838	0.0697192	0.042722	0.022489	0.00723731	0.00278936	360	0.0363045	0.0242012	0.0964373	0.0680247	0.0149117	0.00745868	0.00194671	0.003876	0.390522	0.429159	0.207095	0.165347	276.4	0.005926	0.003879	0.072141	0.05252	0.03013	0.019256	0.12485	0.126682	462.01	0.028511	0.028164	0.051012
372.74	0.146413	0.149887	0.68657	0.68863	0.00228981	0.00405197	0.0289746	0.029662	0.00665267	0.00644719	0.0635276	0.0645312	0.3545	0.358671	856.6	0.0134322	0.00856822	0.105642	0.0700927	0.0427688	0.0226113	0.00717936	0.00280463	360.2	0.0365726	0.024328	0.096896	0.0683609	0.0150195	0.00749853	0.00138256	0.00389684	0.391254	0.430123	0.20684	0.166028	276.6	0.005849	0.003899	0.072494	0.052771	0.030342	0.019356	0.12524	0.127147	462.21	0.028946	0.028264	0.05084
372.94	0.146366	0.14989	0.686239	0.68863	0.00180478	0.00405219	0.0281173	0.0296635	0.00660137	0.00644753	0.063359	0.0645338	0.354341	0.358672	856.8	0.0134864	0.00861478	0.106329	0.070466	0.0429033	0.0227335	0.00722269	0.00281989	360.4	0.0369289	0.0244548	0.0976137	0.0686966	0.0152536	0.00753837	0.00160728	0.00391768	0.392372	0.431079	0.207654	0.166706	276.8	0.005849	0.00392	0.072517	0.053021	0.030267	0.019456	0.12545	0.12761	462.41	0.02844	0.028364	0.050961
373.14	0.146681	0.149893	0.686121	0.68863	0.00168919	0.00405241	0.0276254	0.0296649	0.00685305	0.00644786	0.0638719	0.0645363	0.354465	0.358673	857	0.0135091	0.00866134	0.106592	0.0708393	0.0431675	0.0228558	0.0073514	0.00283516	360.6	0.0369355	0.0245815	0.097808	0.069032	0.0150809	0.0075782	0.00165566	0.00393852	0.392714	0.432026	0.208204	0.167382	277	0.005505	0.003941	0.072833	0.053272	0.030567	0.019556	0.125763	0.12807	462.61	0.027358	0.028463	0.050788
373.34	0.146956	0.149896	0.685977	0.68863	0.00161019	0.00405261	0.0273438	0.0296663	0.0071198	0.00644818	0.0646276	0.0645387	0.354697	0.358674	857.2	0.0135451	0.00870789	0.10685	0.0712124	0.043526	0.022978	0.00733088	0.00285042	360.8	0.0372744	0.0247082	0.0979649	0.069367	0.0147029	0.00761802	0.00178704	0.00395935	0.393759	0.432966	0.208769	0.168057	277.2	0.004486	0.003961	0.07219	0.053521	0.029919	0.019656	0.126152	0.128529	462.81	0.02719	0.028562	0.050405
373.54	0.146858	0.149899	0.68557	0.68863	0.00132117	0.00405281	0.0268594	0.0296676	0.00698102	0.00644849	0.0649595	0.0645411	0.354693	0.358675	857.4	0.0140292	0.00875445	0.107468	0.0715854	0.0441981	0.0231002	0.00798977	0.00286568	361	0.0378507	0.0248347	0.0982814	0.0697017	0.0147539	0.00765782	0.0018639	0.00398017	0.395222	0.433897	0.209652	0.168729	277.4	0.004649	0.003982	0.072184	0.053771	0.029912	0.019756	0.1261	0.128986	463.01	0.026929	0.02866	0.050827
373.74	0.14658	0.149902	0.685238	0.68863	0.00121272	0.004053	0.0266756	0.0296689	0.00627645	0.00644879	0.0645243	0.0645433	0.354671	0.358676	857.6	0.0140899	0.008801	0.108404	0.0719584	0.0446483	0.0232224	0.00839398	0.00288095	361.2	0.0374606	0.0249612	0.0983988	0.0700359	0.0149135	0.00769762	0.0011017	0.00400099	0.395247	0.434821	0.209751	0.1694	277.6	0.004455	0.004003	0.071697	0.05402	0.029229	0.019855	0.125685	0.129441	463.21	0.026787	0.028758	0.051195
373.94	0.146814	0.149904	0.685189	0.68863	0.00146174	0.00405319	0.0270777	0.0296701	0.00639049	0.00644908	0.0641826	0.0645455	0.354912	0.358677	857.8	0.0140268	0.00884755	0.109624	0.0723312	0.0450859	0.0233446	0.00905939	0.00289621	361.4	0.0377227	0.0250877	0.0988429	0.0703697	0.0150812	0.0077374	0.00144053	0.0040218	0.396386	0.435736	0.210817	0.170068	277.8	0.004643	0.004024	0.071707	0.054268	0.029327	0.019955	0.12606	0.129894	463.41	0.026792	0.028855	0.05099
374.14	0.147453	0.149907	0.685587	0.68863	0.00190233	0.00405337	0.027907	0.0296713	0.00712497	0.00644936	0.064013	0.0645475	0.355247	0.358678	858	0.0142767	0.00889409	0.109931	0.0727039	0.0451749	0.0234668	0.00912189	0.00291147	361.6	0.0377673	0.0252141	0.0993913	0.0707032	0.0150825	0.00777717	0.00132027	0.00404261	0.396951	0.436643	0.211168	0.170734	278	0.005032	0.004044	0.071861	0.054517	0.029374	0.020054	0.126214	0.130346	463.61	0.026946	0.028952	0.051713
374.34	0.14757	0.149909	0.685681	0.68863	0.0023166	0.00405354	0.0284566	0.0296725	0.00756794	0.00644963	0.0637455	0.0645496	0.355379	0.358678	858.2	0.0145745	0.00894063	0.110684	0.0730765	0.0452563	0.0235889	0.00942633	0.00292673	361.8	0.0373322	0.0253404	0.0999764	0.0710363	0.0149088	0.00781693	0.00097592	0.00406342	0.397263	0.437543	0.211613	0.171398	278.2	0.005271	0.004065	0.072004	0.054764	0.02963	0.020154	0.126324	0.130795	463.81	0.026996	0.029049	0.051982
374.54	0.147411	0.149911	0.686194	0.68863	0.00241647	0.00405371	0.0285566	0.0296736	0.00787305	0.00644989	0.0633262	0.0645515	0.355199	0.358679	858.4	0.0151211	0.00898717	0.111337	0.0734491	0.0457265	0.0237111	0.00963186	0.00294199	362	0.0374854	0.0254666	0.100284	0.071369	0.0149871	0.00785667	0.00144412	0.00408422	0.398316	0.438435	0.212084	0.172061	278.4	0.004595	0.004085	0.071348	0.055012	0.029071	0.020253	0.126023	0.131243	464.01	0.027742	0.029145	0.052426
374.74	0.14733	0.149914	0.686788	0.68863	0.00252696	0.00405387	0.0286143	0.0296747	0.00772366	0.00645014	0.0632745	0.0645533	0.355246	0.35868	858.6	0.0156928	0.00903371	0.111684	0.0738215	0.0461055	0.0238332	0.00981689	0.00295725	362.2	0.0376974	0.0255928	0.100424	0.0717014	0.0152539	0.0078964	0.00189877	0.00410501	0.398881	0.439319	0.212675	0.172721	278.6	0.004789	0.004106	0.071673	0.055259	0.029457	0.020353	0.126393	0.131688	464.21	0.028575	0.029241	0.052173
374.94	0.147459	0.149916	0.687336	0.68863	0.0028942	0.00405403	0.0287814	0.0296757	0.00765998	0.00645038	0.0634517	0.0645552	0.355294	0.35868	858.8	0.0156113	0.00908025	0.112296	0.0741938	0.0460555	0.0239553	0.00967393	0.00297251	362.4	0.0377786	0.0257189	0.100529	0.0720333	0.0152853	0.00793612	0.00249027	0.0041258	0.399413	0.440196	0.213177	0.173379	278.8	0.004499	0.004127	0.072477	0.055506	0.030117	0.020452	0.126314	0.132132	464.41	0.02863	0.029336	0.052186
375.14	0.147392	0.149918	0.687453	0.68863	0.00318986	0.00405418	0.0291372	0.0296767	0.007705	0.00645062	0.0637668	0.0645569	0.355026	0.358681	859	0.0158047	0.00912678	0.112253	0.074566	0.0459663	0.0240774	0.00964396	0.00298777	362.6	0.0374361	0.025845	0.100115	0.0723649	0.014737	0.00797583	0.00250789	0.00414659	0.399839	0.441065	0.213289	0.174036	279	0.004873	0.004147	0.07268	0.055752	0.030166	0.020551	0.126821	0.132574	464.61	0.028962	0.029431	0.052465
375.34	0.147038	0.14992	0.687623	0.68863	0.00348561	0.00405432	0.0292278	0.0296776	0.00801863	0.00645084	0.0641261	0.0645585	0.35481	0.358681	859.2	0.0152965	0.0091733	0.112752	0.0749381	0.0464276	0.0241995	0.00963076	0.00300303	362.8	0.0375578	0.025971	0.100855	0.0726961	0.0149519	0.00801553	0.00320362	0.00416737	0.400645	0.441926	0.214532	0.17469	279.2	0.00467	0.004168	0.073179	0.055998	0.030115	0.020651	0.126953	0.133014	464.81	0.028682	0.029526	0.052423
375.54	0.147175	0.149922	0.687692	0.68863	0.00418237	0.00405446	0.0292353	0.0296786	0.00832217	0.00645106	0.0644738	0.0645601	0.354971	0.358682	859.4	0.015521	0.00921983	0.113494	0.0753101	0.0470515	0.0243216	0.00957838	0.00301828	363	0.037655	0.0260969	0.100799	0.073027	0.0153262	0.00805521	0.00374287	0.00418815	0.401099	0.44278	0.215105	0.175342	279.4	0.004881	0.004189	0.073168	0.056244	0.030289	0.02075	0.126998	0.133453	465.01	0.029201	0.02962	0.05254
375.74	0.147204	0.149923	0.687594	0.68863	0.0040068	0.0040546	0.0295519	0.0296795	0.008125	0.00645127	0.0646238	0.0645617	0.354715	0.358682	859.6	0.0151529	0.00926635	0.114129	0.075682	0.0470103	0.0244437	0.00863551	0.00303354	363.2	0.0380923	0.0262228	0.101361	0.0733574	0.0158298	0.00809489	0.00407659	0.00420892	0.401781	0.443627	0.215859	0.175993	279.6	0.005192	0.004209	0.073763	0.056489	0.030694	0.020849	0.127708	0.133889	465.21	0.029871	0.029714	0.052838
375.94	0.1466	0.149925	0.687088	0.68863	0.00318792	0.00405473	0.0291314	0.0296803	0.00780268	0.00645147	0.063558	0.0645632	0.353835	0.358683	859.8	0.0152126	0.00931287	0.114323	0.0760538	0.04721	0.0245657	0.00850302	0.0030488	363.4	0.0379107	0.0263486	0.101246	0.0736875	0.015412	0.00813455	0.00382298	0.00422968	0.402128	0.444466	0.216495	0.176641	279.8	0.005555	0.00423	0.074288	0.056734	0.03075	0.020948	0.128406	0.134324	465.41	0.030794	0.029807	0.053088
376.14	0.14588	0.149927	0.686559	0.68863	0.00322081	0.00405486	0.0287455	0.0296812	0.00754891	0.00645167	0.0628579	0.0645646	0.353546	0.358683	860	0.014994	0.00935939	0.114412	0.0764255	0.0472937	0.0246877	0.0084037	0.00306405	363.6	0.0376161	0.0264743	0.101399	0.0740172	0.0149044	0.0081742	0.00391493	0.00425045	0.402986	0.445298	0.217007	0.177288	280	0.005606	0.00425	0.07416	0.056979	0.030615	0.021047	0.128571	0.134757	465.61	0.030625	0.0299	0.052868
376.34	0.145479	0.149928	0.685674	0.68863	0.00307433	0.00405498	0.0281187	0.029682	0.00679916	0.00645186	0.0620475	0.064566	0.352934	0.358684	860.2	0.0148441	0.0094059	0.11469	0.0767971	0.0476108	0.0248098	0.00859107	0.0030793	363.8	0.0375372	0.0266	0.101528	0.0743465	0.0148869	0.00821383	0.00370087	0.0042712	0.403404	0.446123	0.216952	0.177932	280.2	0.00596	0.004271	0.074508	0.057223	0.030286	0.021146	0.12855	0.135188	465.81	0.03098	0.029992	0.053359
376.54	0.145635	0.14993	0.685306	0.68863	0.0030295	0.0040551	0.0277533	0.0296828	0.00635256	0.00645204	0.0615395	0.0645673	0.352451	0.358684	860.4	0.0142925	0.00945242	0.115329	0.0771686	0.0477304	0.0249318	0.00845409	0.00309456	364	0.0375987	0.0267256	0.102187	0.0746755	0.0146495	0.00825346	0.0040276	0.00429195	0.40451	0.446941	0.217113	0.178575	280.4	0.006065	0.004292	0.074239	0.057467	0.030242	0.021245	0.128863	0.135617	466.01	0.030847	0.030084	0.053371
376.74	0.145969	0.149931	0.685424	0.68863	0.00315522	0.00405521	0.0276243	0.0296835	0.00635615	0.00645222	0.0616076	0.0645686	0.352387	0.358685	860.6	0.0146262	0.00949893	0.115506	0.0775399	0.0475607	0.0250537	0.00854067	0.00310981	364.2	0.0376522	0.0268511	0.102631	0.075004	0.0147221	0.00829307	0.00372232	0.0043127	0.405314	0.447752	0.217074	0.179215	280.6	0.005467	0.004312	0.074068	0.05771	0.029864	0.021344	0.129025	0.136045	466.21	0.031383	0.030176	0.053628
376.94	0.146262	0.149933	0.685538	0.68863	0.00343047	0.00405532	0.0278141	0.0296842	0.00635886	0.00645238	0.0620258	0.0645698	0.352906	0.358685	860.8	0.0147959	0.00954543	0.116172	0.0779112	0.0484253	0.0251757	0.00873367	0.00312506	364.4	0.0374046	0.0269766	0.102508	0.0753322	0.0142208	0.00833267	0.00387429	0.00433344	0.405979	0.448556	0.217459	0.179854	280.8	0.005014	0.004333	0.074186	0.057953	0.030041	0.021442	0.129015	0.136471	466.41	0.031189	0.030267	0.054209
377.14	0.14674	0.149934	0.685316	0.68863	0.00362523	0.00405542	0.028015	0.0296849	0.00632483	0.00645255	0.0620828	0.064571	0.353667	0.358685	861	0.0150539	0.00959193	0.116329	0.0782824	0.0485051	0.0252977	0.00839684	0.00314032	364.6	0.0375695	0.027102	0.102833	0.0756601	0.0141147	0.00837226	0.00402193	0.00435418	0.406992	0.449353	0.21748	0.180491	281	0.004205	0.004353	0.074364	0.058196	0.030357	0.021541	0.128998	0.136895	466.61	0.030985	0.030358	0.054024
377.34	0.14692	0.149935	0.684854	0.68863	0.0036201	0.00405553	0.0278223	0.0296856	0.00586967	0.00645271	0.0611314	0.0645722	0.35377	0.358686	861.2	0.0154931	0.00963843	0.116875	0.0786535	0.0490577	0.0254196	0.00864207	0.00315557	364.8	0.0375413	0.0272274	0.102541	0.0759875	0.013612	0.00841183	0.0037248	0.00437491	0.408217	0.450143	0.217246	0.181126	281.2	0.00414	0.004374	0.074638	0.058439	0.030548	0.02164	0.129565	0.137317	466.81	0.030714	0.030448	0.05427
377.54	0.14702	0.149936	0.684758	0.68863	0.00350047	0.00405563	0.0277929	0.0296862	0.00514591	0.00645286	0.0605098	0.0645733	0.353805	0.358686	861.4	0.0159359	0.00968493	0.117982	0.0790244	0.0496513	0.0255416	0.00935255	0.00317082	365	0.037503	0.0273526	0.103318	0.0763146	0.0139404	0.0084514	0.00378217	0.00439564	0.409085	0.450926	0.217751	0.181759	281.4	0.004389	0.004394	0.075072	0.058681	0.030983	0.021738	0.129827	0.137737	467.01	0.030583	0.030538	0.055052
377.74	0.14718	0.149938	0.6852	0.68863	0.00381949	0.00405572	0.0282647	0.0296869	0.0048672	0.00645301	0.0604438	0.0645744	0.354129	0.358686	861.6	0.0157302	0.00973143	0.118723	0.0793953	0.0497588	0.0256635	0.00958685	0.00318607	365.2	0.0377765	0.0274779	0.104366	0.0766413	0.0143395	0.00849095	0.00348763	0.00441636	0.409579	0.451702	0.217747	0.18239	281.6	0.004361	0.004415	0.075782	0.058922	0.031082	0.021837	0.129844	0.138156	467.21	0.0306	0.030628	0.055112
377.94	0.147906	0.149939	0.686064	0.68863	0.00440677	0.00405581	0.0291056	0.0296875	0.00577293	0.00645315	0.0614162	0.0645754	0.354518	0.358686	861.8	0.015876	0.00977792	0.119692	0.0797661	0.0498667	0.0257854	0.00992596	0.00320132	365.4	0.0384974	0.027603	0.104863	0.0769676	0.0144249	0.00853049	0.00378643	0.00443708	0.410927	0.452472	0.218717	0.183019	281.8	0.004306	0.004435	0.076291	0.059164	0.031134	0.021935	0.130332	0.138573	467.41	0.030467	0.030717	0.055195
378.14	0.148246	0.14994	0.686964	0.68863	0.00481486	0.0040559	0.0296107	0.0296881	0.00630448	0.00645329	0.0618792	0.0645764	0.354866	0.358687	862	0.0159215	0.00982441	0.1202	0.0801368	0.0498461	0.0259073	0.0102974	0.00321656	365.6	0.0390697	0.0277281	0.105344	0.0772936	0.0146444	0.00857002	0.0031322	0.00445779	0.411508	0.453235	0.219305	0.183646	282	0.004715	0.004456	0.076996	0.059404	0.031678	0.022033	0.130602	0.138988	467.61	0.030732	0.030805	0.056322
378.34	0.148312	0.149941	0.687682	0.68863	0.00484376	0.00405599	0.0298806	0.0296886	0.00650817	0.00645342	0.062261	0.0645773	0.355114	0.358687	862.2	0.0155926	0.00987089	0.120039	0.0805073	0.0497607	0.0260292	0.0100166	0.00323181	365.8	0.0390467	0.0278531	0.10522	0.0776192	0.0146365	0.00860954	0.00279603	0.0044785	0.412002	0.453992	0.219844	0.184271	282.2	0.00475	0.004477	0.07743	0.059645	0.03193	0.022132	0.130831	0.139402	467.81	0.030308	0.030894	0.055956
378.54	0.148654	0.149942	0.688418	0.68863	0.00488017	0.00405607	0.030093	0.0296892	0.00697154	0.00645355	0.0630374	0.0645782	0.355586	0.358687	862.4	0.0159055	0.00991738	0.12091	0.0808778	0.0499781	0.026151	0.01034	0.00324706	366	0.0391385	0.0279781	0.105527	0.0779444	0.0151484	0.00864904	0.00272651	0.0044992	0.413317	0.454741	0.220664	0.184895	282.4	0.00511	0.004497	0.078073	0.059885	0.031982	0.02223	0.131161	0.139814	468.01	0.030398	0.030982	0.055893
378.74	0.148959	0.149943	0.6893	0.68863	0.0051332	0.00405615	0.0303598	0.0296897	0.0075889	0.00645367	0.0638673	0.0645791	0.356285	0.358687	862.6	0.0157398	0.00996386	0.121182	0.0812481	0.0500301	0.0262729	0.00989933	0.0032623	366.2	0.0394648	0.028103	0.105434	0.0782693	0.0155619	0.00868853	0.00222166	0.0045199	0.413645	0.455485	0.221462	0.185516	282.6	0.006313	0.004518	0.079371	0.060125	0.03279	0.022328	0.132083	0.140224	468.21	0.030719	0.031069	0.055914
378.94	0.148932	0.149944	0.689576	0.68863	0.00505508	0.00405623	0.0305018	0.0296902	0.00801057	0.00645379	0.064174	0.06458	0.356598	0.358688	862.8	0.014837	0.0100103	0.121484	0.0816184	0.0498073	0.0263947	0.00924981	0.00327755	366.4	0.0395	0.0282278	0.105764	0.0785938	0.0158081	0.00872801	0.0019936	0.00454059	0.414559	0.456222	0.222092	0.186136	282.8	0.006621	0.004538	0.080477	0.060365	0.033007	0.022426	0.132267	0.140632	468.41	0.03031	0.031157	0.055596
379.14	0.148648	0.149945	0.689381	0.68863	0.00456409	0.0040563	0.0300747	0.0296907	0.0084653	0.00645391	0.0640531	0.0645808	0.356517	0.358688	863	0.0149134	0.0100568	0.121259	0.0819885	0.0500577	0.0265165	0.00917692	0.0032928	366.6	0.0404391	0.0283526	0.106506	0.0789179	0.0160907	0.00876748	0.00232454	0.00456128	0.415497	0.456953	0.223353	0.186754	283	0.007213	0.004559	0.080714	0.060604	0.032602	0.022524	0.132968	0.141039	468.61	0.030457	0.031243	0.055164
379.34	0.148377	0.149946	0.689602	0.68863	0.00439697	0.00405637	0.0292929	0.0296911	0.00872992	0.00645402	0.0638675	0.0645816	0.356788	0.358688	863.2	0.0139803	0.0101033	0.121607	0.0823586	0.0505033	0.0266384	0.00917129	0.00330804	366.8	0.0418986	0.0284773	0.107833	0.0792416	0.0171519	0.00880694	0.00278764	0.00458197	0.416735	0.457677	0.225304	0.18737	283.2	0.007218	0.004579	0.081012	0.060843	0.032813	0.022622	0.133176	0.141444	468.81	0.030411	0.03133	0.054953
379.54	0.148217	0.149946	0.689239	0.68863	0.00412447	0.00405644	0.0287218	0.0296916	0.00858223	0.00645412	0.0631355	0.0645823	0.356436	0.358688	863.4	0.0140797	0.0101498	0.121823	0.0827285	0.0507067	0.0267601	0.00871933	0.00332328	367	0.0417929	0.028602	0.107766	0.079565	0.017265	0.00884638	0.00225402	0.00460264	0.416976	0.458395	0.225827	0.187984	283.4	0.007266	0.0046	0.080508	0.061081	0.032758	0.02272	0.133218	0.141847	469.01	0.031207	0.031416	0.055149
379.74	0.147504	0.149947	0.689392	0.68863	0.00326266	0.00405651	0.0283	0.029692	0.00817047	0.00645423	0.0619859	0.0645831	0.355381	0.358688	863.6	0.014044	0.0101962	0.121881	0.0830984	0.0508965	0.0268819	0.00827845	0.00333853	367.2	0.0423914	0.0287265	0.108626	0.079888	0.017554	0.00888581	0.00219019	0.00462332	0.418243	0.459107	0.226731	0.188596	283.6	0.007572	0.00462	0.080262	0.061319	0.033043	0.022818	0.133759	0.142249	469.21	0.03136	0.031502	0.055105
379.94	0.146658	0.149948	0.689091	0.68863	0.00274625	0.00405657	0.0277651	0.0296924	0.00768457	0.00645433	0.0609518	0.0645838	0.354752	0.358689	863.8	0.014137	0.0102427	0.121869	0.0834681	0.0511112	0.0270037	0.00811333	0.00335377	367.4	0.0429864	0.028851	0.109185	0.0802106	0.0175404	0.00892523	0.00213356	0.00464399	0.419422	0.459813	0.227615	0.189207	283.8	0.007861	0.00464	0.080538	0.061557	0.033394	0.022916	0.134464	0.142649	469.41	0.031445	0.031587	0.054808
380.14	0.146329	0.149949	0.688425	0.68863	0.00288144	0.00405664	0.0273442	0.0296928	0.00777436	0.00645442	0.060358	0.0645845	0.354591	0.358689	864	0.0144046	0.0102892	0.122605	0.0838378	0.0513974	0.0271254	0.00797086	0.00336901	367.6	0.0439087	0.0289755	0.110196	0.0805329	0.0180305	0.00896464	0.00240004	0.00466465	0.420617	0.460513	0.228188	0.189815	284	0.008212	0.004661	0.080229	0.061794	0.033444	0.023014	0.134805	0.143048	469.61	0.030968	0.031672	0.054949
380.34	0.146856	0.149949	0.688152	0.68863	0.00313525	0.0040567	0.027387	0.0296932	0.00796577	0.00645452	0.0602475	0.0645851	0.354789	0.358689	864.2	0.0147399	0.0103356	0.123217	0.0842073	0.0516465	0.0272472	0.0079858	0.00338425	367.8	0.0442438	0.0290999	0.110657	0.0808548	0.0182541	0.00900404	0.00249468	0.00468531	0.42134	0.461207	0.22851	0.190422	284.2	0.007618	0.004681	0.07982	0.062031	0.032856	0.023112	0.134831	0.143444	469.81	0.030297	0.031756	0.055005
380.54	0.147648	0.14995	0.688273	0.68863	0.00335795	0.00405675	0.0275963	0.0296936	0.00811497	0.00645461	0.0603487	0.0645858	0.355156	0.358689	864.4	0.014921	0.0103821	0.123663	0.0845767	0.0518656	0.0273689	0.00812698	0.00339949	368	0.0444807	0.0292242	0.110978	0.0811763	0.0179425	0.00904342	0.00223836	0.00470597	0.422168	0.461894	0.228943	0.191027	284.4	0.00711	0.004702	0.079165	0.062268	0.032176	0.023209	0.134876	0.143839	470.01	0.03022	0.031841	0.054644
380.74	0.148099	0.149951	0.688355	0.68863	0.00349416	0.00405681	0.027806	0.029694	0.00808677	0.00645469	0.0603384	0.0645864	0.355582	0.358689	864.6	0.0152925	0.0104285	0.124149	0.0849461	0.0523776	0.0274906	0.0083546	0.00341473	368.2	0.0441194	0.0293485	0.11089	0.0814975	0.017966	0.0090828	0.00187993	0.00472662	0.422577	0.462576	0.229071	0.19163	284.6	0.006944	0.004722	0.079082	0.062504	0.032273	0.023307	0.135155	0.144233	470.21	0.030701	0.031924	0.054579
380.94	0.148338	0.149951	0.688087	0.68863	0.00349188	0.00405686	0.0278001	0.0296943	0.0078376	0.00645478	0.0599283	0.064587	0.355814	0.358689	864.8	0.0154575	0.010475	0.124376	0.0853153	0.0530479	0.0276123	0.00840914	0.00342997	368.4	0.0443131	0.0294727	0.11102	0.0818183	0.0177893	0.00912216	0.00245301	0.00474726	0.423576	0.463252	0.229469	0.192231	284.8	0.006942	0.004743	0.078796	0.06274	0.032715	0.023404	0.135682	0.144625	470.41	0.030771	0.032008	0.05476
381.14	0.148586	0.149952	0.687524	0.68863	0.00351241	0.00405692	0.0274313	0.0296947	0.00740572	0.00645486	0.0590489	0.0645875	0.355558	0.358689	865	0.0157526	0.0105214	0.124613	0.0856844	0.0531072	0.027734	0.00883464	0.00344521	368.6	0.0440525	0.0295968	0.110734	0.0821387	0.0171421	0.0091615	0.00238194	0.0047679	0.424102	0.463922	0.229505	0.192831	285	0.006873	0.004763	0.07911	0.062976	0.032965	0.023502	0.136136	0.145015	470.61	0.030865	0.032091	0.054489
381.34	0.14884	0.149952	0.687286	0.68863	0.00416056	0.00405697	0.0273333	0.029695	0.0067863	0.00645493	0.0587672	0.0645881	0.354976	0.358689	865.2	0.0158605	0.0105679	0.125042	0.0860534	0.0535362	0.0278557	0.00938934	0.00346045	368.8	0.0436195	0.0297209	0.110809	0.0824588	0.016864	0.00920084	0.00264517	0.00478854	0.424626	0.464587	0.22944	0.193428	285.2	0.006834	0.004784	0.079268	0.063211	0.032942	0.023599	0.136649	0.145403	470.81	0.030847	0.032173	0.055052
381.54	0.148939	0.149953	0.687549	0.68863	0.00445046	0.00405702	0.0280528	0.0296953	0.00664408	0.00645501	0.0594959	0.0645886	0.35506	0.35869	865.4	0.0159248	0.0106143	0.12572	0.0864224	0.0533521	0.0279773	0.00973115	0.00347569	369	0.0435029	0.0298449	0.111838	0.0827785	0.0174667	0.00924017	0.0034909	0.00480917	0.425263	0.465245	0.230248	0.194024	285.4	0.006188	0.004804	0.079321	0.063446	0.032596	0.023697	0.135942	0.14579	471.01	0.03137	0.032256	0.055248
381.74	0.14863	0.149953	0.687629	0.68863	0.00456447	0.00405706	0.0282241	0.0296956	0.00629429	0.00645508	0.0604877	0.0645891	0.355141	0.35869	865.6	0.0159909	0.0106607	0.126158	0.0867912	0.052682	0.028099	0.00964047	0.00349092	369.2	0.0436651	0.0299688	0.111871	0.0830979	0.0178102	0.00927948	0.00346137	0.00482979	0.425643	0.465898	0.230558	0.194618	285.6	0.005845	0.004824	0.07948	0.06368	0.032216	0.023794	0.135876	0.146175	471.21	0.031791	0.032338	0.055492
381.94	0.148334	0.149954	0.687793	0.68863	0.0046538	0.00405711	0.0284247	0.0296959	0.00599085	0.00645515	0.0614944	0.0645896	0.355233	0.35869	865.8	0.0159373	0.0107072	0.126563	0.0871599	0.0522067	0.0282206	0.00935327	0.00350616	369.4	0.0431779	0.0300927	0.111456	0.0834169	0.0176422	0.00931878	0.00350771	0.00485041	0.425971	0.466545	0.230649	0.195211	285.8	0.005783	0.004845	0.07998	0.063914	0.032402	0.023891	0.136357	0.146559	471.41	0.031804	0.032419	0.055971
382.14	0.147808	0.149954	0.687959	0.68863	0.00466132	0.00405715	0.0284839	0.0296962	0.00568764	0.00645522	0.0620286	0.0645901	0.355326	0.35869	866	0.0160873	0.0107536	0.126869	0.0875285	0.0523238	0.0283422	0.00977346	0.00352139	369.6	0.0423223	0.0302165	0.111117	0.0837355	0.0172221	0.00935807	0.00297071	0.00487103	0.426039	0.467187	0.230436	0.195801	286	0.006057	0.004865	0.080465	0.064148	0.032296	0.023988	0.136352	0.146941	471.61	0.032001	0.0325	0.056167
382.34	0.147502	0.149955	0.687848	0.68863	0.00435723	0.00405719	0.0285425	0.0296965	0.00572585	0.00645529	0.0623177	0.0645905	0.35534	0.35869	866.2	0.0162271	0.0108	0.126807	0.087897	0.0518931	0.0284638	0.00932077	0.00353663	369.8	0.0418393	0.0303403	0.111056	0.0840537	0.0170016	0.00939735	0.00311728	0.00489164	0.425988	0.467823	0.230711	0.19639	286.2	0.005688	0.004886	0.081075	0.064382	0.032162	0.024086	0.136222	0.147322	471.81	0.031943	0.032581	0.055841
382.54	0.147413	0.149955	0.687799	0.68863	0.00413521	0.00405723	0.0285253	0.0296968	0.00604026	0.00645535	0.0624609	0.0645909	0.355505	0.35869	866.4	0.0167037	0.0108465	0.128029	0.0882654	0.0521456	0.0285854	0.0100424	0.00355186	370	0.0418207	0.030464	0.111033	0.0843716	0.0169101	0.00943661	0.00330366	0.00491225	0.426591	0.468454	0.231273	0.196977	286.4	0.005918	0.004906	0.081587	0.064615	0.032242	0.024183	0.136462	0.147701	472.01	0.032089	0.032662	0.05609
382.74	0.147334	0.149956	0.687832	0.68863	0.0040644	0.00405727	0.0283797	0.029697	0.00606229	0.00645541	0.0625557	0.0645914	0.355843	0.35869	866.6	0.0168419	0.0108929	0.128248	0.0886338	0.0524583	0.0287069	0.010255	0.0035671	370.2	0.0413916	0.0305876	0.111005	0.0846892	0.0164607	0.00947586	0.00340039	0.00493285	0.426711	0.469079	0.231888	0.197562	286.6	0.006078	0.004926	0.082536	0.064848	0.032486	0.02428	0.136726	0.148078	472.21	0.032625	0.032742	0.055926
382.94	0.147338	0.149956	0.687636	0.68863	0.0036775	0.00405731	0.0280582	0.0296973	0.00597504	0.00645547	0.0625815	0.0645918	0.356069	0.35869	866.8	0.01662	0.0109393	0.128904	0.089002	0.0530143	0.0288285	0.0104409	0.00358233	370.4	0.0412	0.0307111	0.11134	0.0850063	0.0164917	0.00951511	0.0036321	0.00495344	0.427202	0.469699	0.232277	0.198145	286.8	0.006008	0.004947	0.082722	0.06508	0.03246	0.024377	0.136757	0.148454	472.41	0.032503	0.032822	0.05574
383.14	0.147296	0.149956	0.687817	0.68863	0.00333397	0.00405735	0.0278114	0.0296975	0.00650907	0.00645552	0.0631449	0.0645922	0.356479	0.35869	867	0.0173166	0.0109857	0.128987	0.0893701	0.0531482	0.0289501	0.010684	0.00359756	370.6	0.0417085	0.0308346	0.111944	0.0853231	0.0166711	0.00955433	0.00409468	0.00497404	0.427834	0.470313	0.233504	0.198727	287	0.005939	0.004967	0.082319	0.065312	0.03261	0.024474	0.137317	0.148828	472.61	0.032955	0.032901	0.055879
383.34	0.147254	0.149957	0.688254	0.68863	0.00365096	0.00405738	0.0280933	0.0296977	0.00688063	0.00645558	0.0638215	0.0645925	0.356607	0.35869	867.2	0.0172576	0.0110321	0.129586	0.0897381	0.0537909	0.0290716	0.0105021	0.00361279	370.8	0.0415887	0.0309581	0.112116	0.0856396	0.0171929	0.00959355	0.00386841	0.00499462	0.428577	0.470922	0.234088	0.199307	287.2	0.005824	0.004988	0.08269	0.065544	0.033244	0.02457	0.137627	0.149201	472.81	0.03306	0.03298	0.056288
383.54	0.147348	0.149957	0.688724	0.68863	0.00370298	0.00405742	0.028651	0.0296979	0.00751849	0.00645563	0.0640557	0.0645929	0.356581	0.35869	867.4	0.017623	0.0110786	0.129868	0.090106	0.0538913	0.0291931	0.0099821	0.00362802	371	0.0409181	0.0310814	0.112157	0.0859557	0.0170235	0.00963276	0.00327954	0.00501521	0.428937	0.471526	0.233968	0.199885	287.4	0.005967	0.005008	0.082783	0.065775	0.034197	0.024667	0.137768	0.149572	473.01	0.033311	0.033059	0.056877
383.74	0.147539	0.149958	0.689513	0.68863	0.00401871	0.00405745	0.0289148	0.0296981	0.00778292	0.00645568	0.0640557	0.0645933	0.356971	0.35869	867.6	0.017886	0.011125	0.130347	0.0904738	0.0541657	0.0293146	0.00928974	0.00364325	371.2	0.0414366	0.0312047	0.112741	0.0862714	0.017511	0.00967195	0.00347285	0.00503578	0.429928	0.472125	0.234396	0.200461	287.6	0.006901	0.005028	0.083608	0.066006	0.035464	0.024764	0.139192	0.149942	473.21	0.033451	0.033137	0.057458
383.94	0.147636	0.149958	0.689351	0.68863	0.00431182	0.00405748	0.0285633	0.0296984	0.00786327	0.00645573	0.063735	0.0645936	0.357088	0.35869	867.8	0.0185431	0.0111714	0.131597	0.0908415	0.054745	0.0294361	0.00921684	0.00365848	371.4	0.0413568	0.031328	0.112887	0.0865868	0.0170921	0.00971113	0.00338723	0.00505636	0.430699	0.472719	0.234739	0.201036	287.8	0.00688	0.005049	0.084041	0.066237	0.035666	0.02486	0.139541	0.15031	473.41	0.033201	0.033215	0.057943
384.14	0.148139	0.149958	0.689122	0.68863	0.00481809	0.00405751	0.0285251	0.0296986	0.00832146	0.00645578	0.0634376	0.0645939	0.357226	0.358691	868	0.0190851	0.0112178	0.132677	0.0912091	0.0553891	0.0295575	0.00933323	0.00367371	371.6	0.0415408	0.0314512	0.113332	0.0869018	0.0170921	0.0097503	0.00342285	0.00507692	0.431567	0.473307	0.235454	0.201609	288	0.006619	0.005069	0.084063	0.066467	0.035747	0.024957	0.140209	0.150677	473.61	0.032623	0.033293	0.058409
384.34	0.148651	0.149958	0.688946	0.68863	0.00532253	0.00405754	0.0283262	0.0296987	0.00835052	0.00645583	0.0632153	0.0645942	0.357174	0.358691	868.2	0.0188379	0.0112642	0.132954	0.0915766	0.0552864	0.029679	0.00907614	0.00368894	371.8	0.041741	0.0315743	0.113782	0.0872164	0.01727	0.00978946	0.00358893	0.00509749	0.432068	0.47389	0.236523	0.20218	288.2	0.006235	0.005089	0.084063	0.066697	0.035606	0.025054	0.140448	0.151042	473.81	0.032725	0.03337	0.058295
384.54	0.148623	0.149959	0.68878	0.68863	0.00544325	0.00405757	0.0279484	0.0296989	0.00814969	0.00645587	0.062902	0.0645945	0.356868	0.358691	868.4	0.0183381	0.0113106	0.132999	0.091944	0.0554784	0.0298004	0.00903778	0.00370417	372	0.0417921	0.0316973	0.113643	0.0875307	0.0170178	0.00982861	0.00297762	0.00511805	0.432639	0.474469	0.237377	0.202749	288.4	0.006459	0.00511	0.083967	0.066927	0.035602	0.02515	0.140712	0.151405	474.01	0.03308	0.033447	0.058552
384.74	0.148479	0.149959	0.688851	0.68863	0.00516878	0.0040576	0.0278333	0.0296991	0.00785767	0.00645591	0.0626943	0.0645948	0.356434	0.358691	868.6	0.0184941	0.011357	0.133938	0.0923113	0.0559291	0.0299219	0.0095377	0.00371939	372.2	0.0415469	0.0318203	0.113433	0.0878446	0.0169999	0.00986774	0.00303055	0.0051386	0.433575	0.475042	0.237665	0.203317	288.6	0.00712	0.00513	0.084192	0.067156	0.036342	0.025246	0.141516	0.151767	474.21	0.033015	0.033524	0.058227
384.94	0.148746	0.149959	0.688898	0.68863	0.00509477	0.00405763	0.0275334	0.0296993	0.00737964	0.00645595	0.0621753	0.0645951	0.355682	0.358691	868.8	0.0183331	0.0114034	0.134062	0.0926785	0.05623	0.0300433	0.00980212	0.00373462	372.4	0.0420686	0.0319433	0.113946	0.0881582	0.0167459	0.00990686	0.00306841	0.00515915	0.434768	0.47561	0.23861	0.203883	288.8	0.007252	0.00515	0.08419	0.067385	0.036258	0.025343	0.141852	0.152128	474.41	0.03253	0.0336	0.057983
385.14	0.149016	0.14996	0.688693	0.68863	0.00526579	0.00405765	0.0276428	0.0296994	0.00685281	0.00645599	0.0614872	0.0645954	0.355178	0.358691	869	0.0180906	0.0114498	0.134788	0.0930456	0.0560932	0.0301647	0.0101464	0.00374985	372.6	0.0418779	0.0320661	0.11386	0.0884714	0.0161257	0.00994597	0.0021277	0.00517969	0.434833	0.476174	0.238498	0.204447	289	0.007388	0.005171	0.084592	0.067614	0.035661	0.025439	0.142256	0.152487	474.61	0.032414	0.033676	0.058142
385.34	0.148687	0.14996	0.688388	0.68863	0.00490691	0.00405768	0.0276305	0.0296996	0.00572432	0.00645603	0.0608981	0.0645956	0.354716	0.358691	869.2	0.0182037	0.0114962	0.135213	0.0934125	0.0558827	0.0302861	0.010269	0.00376507	372.8	0.0417375	0.0321889	0.114602	0.0887843	0.0166744	0.00998507	0.00232153	0.00520023	0.43576	0.476733	0.238846	0.20501	289.2	0.007124	0.005191	0.084094	0.067842	0.035462	0.025535	0.142088	0.152844	474.81	0.032793	0.033752	0.058572
385.54	0.148018	0.14996	0.688097	0.68863	0.00406264	0.0040577	0.0274366	0.0296998	0.00531325	0.00645607	0.0603566	0.0645959	0.354273	0.358691	869.4	0.0180968	0.0115425	0.135601	0.0937794	0.0551003	0.0304075	0.00987963	0.0037803	373	0.0420747	0.0323117	0.115308	0.0890968	0.016757	0.0100242	0.00255614	0.00522076	0.436372	0.477286	0.239828	0.205571	289.4	0.007246	0.005211	0.083956	0.06807	0.035176	0.025632	0.141713	0.1532	475.01	0.033218	0.033827	0.059027
385.74	0.147316	0.14996	0.687812	0.68863	0.00357488	0.00405773	0.0268612	0.0296999	0.00469822	0.0064561	0.0602099	0.0645961	0.353756	0.358691	869.6	0.0178925	0.0115889	0.136294	0.0941462	0.0552126	0.0305288	0.00960182	0.00379552	373.2	0.0425001	0.0324344	0.115432	0.089409	0.0168976	0.0100632	0.00209742	0.00524129	0.437392	0.477835	0.240435	0.20613	289.6	0.007503	0.005231	0.0837	0.068298	0.034588	0.025728	0.14194	0.153555	475.21	0.033284	0.033902	0.058964
385.94	0.147014	0.14996	0.687913	0.68863	0.00330933	0.00405775	0.0268376	0.0297	0.00450707	0.00645614	0.0600807	0.0645963	0.353525	0.358691	869.8	0.0172936	0.0116353	0.136463	0.0945129	0.0552342	0.0306502	0.00963466	0.00381074	373.4	0.0429431	0.032557	0.115679	0.0897207	0.0161662	0.0101023	0.0019855	0.00526182	0.438153	0.47838	0.240616	0.206688	289.8	0.007659	0.005252	0.084112	0.068525	0.034753	0.025824	0.142122	0.153908	475.41	0.033105	0.033977	0.059047
386.14	0.146813	0.149961	0.688006	0.68863	0.00284303	0.00405777	0.0268495	0.0297002	0.00430654	0.00645617	0.0601005	0.0645966	0.353269	0.358691	870	0.0168591	0.0116817	0.136863	0.0948795	0.0552052	0.0307715	0.0103251	0.00382596	373.6	0.0433869	0.0326795	0.116009	0.0900322	0.016275	0.0101414	0.00195866	0.00528234	0.438999	0.478919	0.241184	0.207244	290	0.006981	0.005272	0.08405	0.068752	0.033811	0.02592	0.14165	0.15426	475.61	0.033239	0.034051	0.058795
386.34	0.146847	0.149961	0.687987	0.68863	0.00246014	0.00405779	0.026805	0.0297003	0.00433289	0.0064562	0.0601877	0.0645968	0.35319	0.358691	870.2	0.0168713	0.0117281	0.137415	0.0952459	0.0553999	0.0308928	0.0104564	0.00384119	373.8	0.0440578	0.032802	0.116482	0.0903433	0.0163996	0.0101804	0.00245424	0.00530285	0.439452	0.479454	0.242105	0.207798	290.2	0.006462	0.005292	0.083795	0.068979	0.033707	0.026016	0.141405	0.15461	475.81	0.033549	0.034125	0.058599
386.54	0.147191	0.149961	0.688048	0.68863	0.00243237	0.00405781	0.0269821	0.0297004	0.00453899	0.00645624	0.0602571	0.064597	0.353509	0.358691	870.4	0.016483	0.0117744	0.138176	0.0956123	0.055987	0.0310141	0.0111288	0.00385641	374	0.044307	0.0329244	0.116628	0.090654	0.0163984	0.0102194	0.00276787	0.00532336	0.440542	0.479984	0.242644	0.20835	290.4	0.006423	0.005312	0.083639	0.069205	0.033525	0.026112	0.141506	0.154959	476.01	0.033581	0.034198	0.05841
386.74	0.14754	0.149961	0.688086	0.68863	0.00246117	0.00405783	0.0271223	0.0297006	0.00453356	0.00645627	0.0605118	0.0645972	0.353981	0.358691	870.6	0.0161863	0.0118208	0.137907	0.0959786	0.0565709	0.0311354	0.0108523	0.00387163	374.2	0.0440004	0.0330468	0.117004	0.0909644	0.016354	0.0102584	0.00288265	0.00534387	0.440657	0.48051	0.243078	0.208901	290.6	0.006404	0.005333	0.083648	0.069431	0.033197	0.026207	0.141613	0.155306	476.21	0.033788	0.034272	0.057916
386.94	0.147504	0.149961	0.688054	0.68863	0.00206494	0.00405785	0.0269416	0.0297007	0.00489005	0.00645629	0.0605268	0.0645974	0.354351	0.358691	870.8	0.0156775	0.0118672	0.138156	0.0963448	0.0569182	0.0312567	0.0105127	0.00388685	374.4	0.0442289	0.0331691	0.117563	0.0912744	0.0165431	0.0102974	0.00272381	0.00536437	0.441394	0.481031	0.243505	0.20945	290.8	0.006006	0.005353	0.083043	0.069656	0.032785	0.026303	0.141608	0.155652	476.41	0.03391	0.034345	0.057944
387.14	0.147885	0.149962	0.688638	0.68863	0.0023882	0.00405787	0.0273534	0.0297008	0.00586911	0.00645632	0.0611855	0.0645976	0.355103	0.358691	871	0.0164188	0.0119135	0.138503	0.0967109	0.057431	0.031378	0.0106345	0.00390207	374.6	0.04444	0.0332913	0.117725	0.0915841	0.0165013	0.0103364	0.00237144	0.00538486	0.442	0.481548	0.244061	0.209998	291	0.005746	0.005373	0.083417	0.069882	0.033008	0.026399	0.141768	0.155996	476.61	0.034096	0.034417	0.057591
387.34	0.148141	0.149962	0.689239	0.68863	0.00286219	0.00405788	0.0278453	0.0297009	0.00640299	0.00645635	0.0616322	0.0645977	0.355461	0.358691	871.2	0.0168646	0.0119599	0.139364	0.0970768	0.0584779	0.0314992	0.0104811	0.00391728	374.8	0.0447802	0.0334135	0.1183	0.0918934	0.0172914	0.0103754	0.00248811	0.00540536	0.443088	0.48206	0.244772	0.210544	291.2	0.005993	0.005393	0.084408	0.070107	0.033485	0.026495	0.142091	0.156339	476.81	0.033929	0.03449	0.057954
387.54	0.148826	0.149962	0.690141	0.68863	0.0033419	0.0040579	0.0284748	0.029701	0.00720018	0.00645638	0.0624789	0.0645979	0.356191	0.358691	871.4	0.0169911	0.0120062	0.139746	0.0974427	0.0586267	0.0316205	0.0102281	0.0039325	375	0.0446286	0.0335356	0.118425	0.0922023	0.0173029	0.0104144	0.0023038	0.00542584	0.443225	0.482568	0.245003	0.211088	291.4	0.005949	0.005414	0.08495	0.070331	0.033892	0.02659	0.142504	0.156681	477.01	0.034095	0.034562	0.057926
387.74	0.149393	0.149962	0.690596	0.68863	0.00408374	0.00405792	0.0288988	0.0297011	0.00742378	0.0064564	0.0631271	0.0645981	0.356643	0.358691	871.6	0.0178036	0.0120526	0.139952	0.0978085	0.0591052	0.0317417	0.00981074	0.00394772	375.2	0.0450328	0.0336577	0.118441	0.0925109	0.0171957	0.0104533	0.00261181	0.00544632	0.443908	0.483072	0.245583	0.211631	291.6	0.006269	0.005434	0.085135	0.070555	0.034093	0.026686	0.143061	0.157021	477.21	0.033572	0.034633	0.057824
387.94	0.149545	0.149962	0.690758	0.68863	0.00481963	0.00405793	0.0291072	0.0297012	0.00766556	0.00645643	0.0635833	0.0645982	0.35669	0.358691	871.8	0.0181631	0.012099	0.140283	0.0981741	0.0593587	0.0318629	0.00978304	0.00396293	375.4	0.0449804	0.0337797	0.118478	0.0928192	0.0169453	0.0104923	0.00306604	0.0054668	0.444646	0.483571	0.246242	0.212171	291.8	0.005851	0.005454	0.085217	0.070779	0.034059	0.026781	0.142919	0.15736	477.41	0.033333	0.034705	0.058036
388.14	0.149444	0.149962	0.690813	0.68863	0.00535034	0.00405795	0.0291719	0.0297013	0.00805477	0.00645645	0.0638907	0.0645984	0.356739	0.358691	872	0.0184045	0.0121453	0.140588	0.0985397	0.0596249	0.0319841	0.0100409	0.00397815	375.6	0.0455934	0.0339016	0.118984	0.0931271	0.0173525	0.0105312	0.00354421	0.00548727	0.444998	0.484066	0.246956	0.212711	292	0.005915	0.005474	0.085633	0.071003	0.034142	0.026877	0.143877	0.157697	477.61	0.033104	0.034776	0.05773
388.34	0.149285	0.149963	0.690765	0.68863	0.00551276	0.00405796	0.0291714	0.0297014	0.00827029	0.00645647	0.0638996	0.0645985	0.356948	0.358691	872.2	0.0186444	0.0121917	0.140522	0.0989052	0.0595325	0.0321053	0.00995263	0.00399337	375.8	0.0456245	0.0340234	0.118862	0.0934347	0.0170463	0.0105701	0.00313869	0.00550774	0.444777	0.484556	0.247288	0.213249	292.2	0.0061	0.005495	0.085932	0.071226	0.034282	0.026972	0.144389	0.158033	477.81	0.033221	0.034846	0.057843
388.54	0.149095	0.149963	0.690999	0.68863	0.00552314	0.00405798	0.0295346	0.0297015	0.00825463	0.00645649	0.0640893	0.0645987	0.357332	0.358691	872.4	0.0189292	0.012238	0.140913	0.0992705	0.0597495	0.0322264	0.0104936	0.00400858	376	0.0455176	0.0341453	0.118194	0.0937419	0.0162238	0.010609	0.00244926	0.0055282	0.444952	0.485042	0.247231	0.213785	292.4	0.006381	0.005515	0.086676	0.071449	0.034646	0.027067	0.144816	0.158367	478.01	0.033237	0.034917	0.057813
388.74	0.149429	0.149963	0.691435	0.68863	0.00580381	0.00405799	0.0304388	0.0297016	0.00851868	0.00645651	0.0649272	0.0645988	0.35794	0.358691	872.6	0.0197045	0.0122843	0.141771	0.0996358	0.0601047	0.0323476	0.0108676	0.00402379	376.2	0.045657	0.034267	0.118152	0.0940488	0.0157577	0.0106479	0.00211777	0.00554866	0.445289	0.485525	0.24695	0.214319	292.6	0.006801	0.005535	0.087441	0.071671	0.0348	0.027163	0.145745	0.1587	478.21	0.032813	0.034987	0.057525
388.94	0.149856	0.149963	0.6914	0.68863	0.00610179	0.004058	0.0306453	0.0297017	0.00833254	0.00645653	0.0648162	0.064599	0.358267	0.358691	872.8	0.0197152	0.0123307	0.142062	0.100001	0.0600962	0.0324687	0.0106651	0.00403901	376.4	0.0460433	0.0343887	0.118669	0.0943553	0.015237	0.0106868	0.00205844	0.00556911	0.445254	0.486003	0.24711	0.214852	292.8	0.007083	0.005555	0.088055	0.071894	0.034821	0.027258	0.146289	0.159032	478.41	0.032331	0.035057	0.057393
389.14	0.14951	0.149963	0.691083	0.68863	0.00576815	0.00405802	0.0306838	0.0297018	0.0079626	0.00645655	0.0646116	0.0645991	0.358448	0.358691	873	0.0199996	0.012377	0.142624	0.100366	0.059587	0.0325898	0.0107453	0.00405422	376.6	0.0462738	0.0345103	0.119056	0.0946614	0.015231	0.0107257	0.00175541	0.00558956	0.445615	0.486476	0.247062	0.215383	293	0.007172	0.005575	0.088434	0.072116	0.03523	0.027353	0.146754	0.159363	478.61	0.032162	0.035126	0.057591
389.34	0.148918	0.149963	0.690936	0.68863	0.00511259	0.00405803	0.0305386	0.0297018	0.00757531	0.00645657	0.0645759	0.0645992	0.35832	0.358691	873.2	0.0203896	0.0124233	0.143199	0.100731	0.0598085	0.0327109	0.0111825	0.00406943	376.8	0.0464736	0.0346318	0.119704	0.0949672	0.0154169	0.0107645	0.00235085	0.00561	0.446698	0.486946	0.247494	0.215913	293.2	0.007385	0.005595	0.089036	0.072337	0.035932	0.027448	0.146718	0.159692	478.81	0.032462	0.035195	0.058093
389.54	0.148703	0.149963	0.691053	0.68863	0.00482522	0.00405804	0.0306614	0.0297019	0.00809196	0.00645659	0.0651373	0.0645993	0.358402	0.358691	873.4	0.0201582	0.0124697	0.143466	0.101096	0.0597441	0.032832	0.010719	0.00408464	377	0.0469924	0.0347533	0.120106	0.0952727	0.0152446	0.0108034	0.00264754	0.00563044	0.447597	0.487412	0.248036	0.216441	293.4	0.007727	0.005616	0.089145	0.072558	0.035823	0.027543	0.14709	0.160019	479.01	0.032144	0.035264	0.05785
389.74	0.148286	0.149963	0.690826	0.68863	0.00437442	0.00405805	0.0305907	0.029702	0.0078913	0.00645661	0.0654119	0.0645994	0.358386	0.358691	873.6	0.0202364	0.012516	0.144432	0.101461	0.0602939	0.0329531	0.0108494	0.00409985	377.2	0.0472348	0.0348748	0.120389	0.0955778	0.0155001	0.0108422	0.00226878	0.00565087	0.448532	0.487873	0.248178	0.216967	293.6	0.007916	0.005636	0.089664	0.072779	0.036005	0.027638	0.147591	0.160346	479.21	0.032316	0.035333	0.057837
389.94	0.147817	0.149963	0.690558	0.68863	0.00372804	0.00405806	0.0303204	0.0297021	0.00739339	0.00645663	0.0653929	0.0645996	0.358311	0.358691	873.8	0.0195142	0.0125623	0.144656	0.101825	0.0600906	0.0330742	0.0109454	0.00411506	377.4	0.0476165	0.0349961	0.120735	0.0958826	0.0156525	0.0108811	0.00249956	0.0056713	0.449603	0.488331	0.248285	0.217492	293.8	0.007735	0.005656	0.090289	0.073	0.03643	0.027733	0.148018	0.16067	479.41	0.032596	0.035401	0.058487
390.14	0.147459	0.149963	0.690654	0.68863	0.00340279	0.00405807	0.0301497	0.0297021	0.00715065	0.00645664	0.06581	0.0645996	0.358475	0.358691	874	0.0192111	0.0126087	0.14503	0.10219	0.0601038	0.0331952	0.0106578	0.00413027	377.6	0.0477677	0.0351174	0.121113	0.096187	0.0164004	0.0109199	0.00280436	0.00569173	0.450936	0.488785	0.248673	0.218015	294	0.006951	0.005676	0.090321	0.07322	0.035948	0.027828	0.147758	0.160994	479.61	0.032597	0.035469	0.05836
390.34	0.14732	0.149964	0.690667	0.68863	0.0036369	0.00405809	0.030366	0.0297022	0.00725025	0.00645666	0.0660245	0.0645998	0.358632	0.358691	874.2	0.0195605	0.012655	0.145907	0.102554	0.0608184	0.0333163	0.010755	0.00414548	377.8	0.048229	0.0352387	0.121478	0.0964911	0.0172012	0.0109587	0.00317454	0.00571215	0.451697	0.489235	0.249381	0.218537	294.2	0.007082	0.005696	0.090019	0.07344	0.036382	0.027922	0.148065	0.161316	479.81	0.033371	0.035537	0.058488
390.54	0.147133	0.149964	0.690503	0.68863	0.00351375	0.0040581	0.0297871	0.0297023	0.0072572	0.00645667	0.0652834	0.0645999	0.358295	0.358691	874.4	0.0188092	0.0127013	0.146077	0.102919	0.0603449	0.0334373	0.0105413	0.00416069	378	0.0482181	0.0353598	0.121823	0.0967948	0.0175956	0.0109975	0.00335911	0.00573256	0.452406	0.489681	0.250162	0.219057	294.4	0.006765	0.005716	0.090405	0.07366	0.036359	0.028017	0.148137	0.161637	480.01	0.033705	0.035604	0.058425
390.74	0.147011	0.149964	0.689986	0.68863	0.00339061	0.0040581	0.0294459	0.0297023	0.00709084	0.00645669	0.0646676	0.0646	0.357921	0.358691	874.6	0.0185462	0.0127476	0.145958	0.103283	0.0602772	0.0335583	0.00962439	0.0041759	378.2	0.048477	0.0354809	0.122731	0.0970982	0.0182373	0.0110363	0.00383665	0.00575297	0.453191	0.490123	0.25136	0.219576	294.6	0.006553	0.005737	0.090291	0.073879	0.036328	0.028112	0.148149	0.161957	480.21	0.034363	0.035671	0.058739
390.94	0.146965	0.149964	0.689766	0.68863	0.00315664	0.00405811	0.0291586	0.0297024	0.006883	0.0064567	0.0640186	0.0646	0.357428	0.358691	874.8	0.0187719	0.0127939	0.146645	0.103647	0.0602113	0.0336793	0.00953898	0.0041911	378.4	0.0488713	0.035602	0.123494	0.0974012	0.0190041	0.011075	0.00381783	0.00577337	0.454471	0.490561	0.251835	0.220093	294.8	0.006414	0.005757	0.090435	0.074098	0.03668	0.028206	0.148073	0.162275	480.41	0.034851	0.035738	0.059114
391.14	0.146857	0.149964	0.689658	0.68863	0.00310505	0.00405812	0.0290631	0.0297024	0.00663734	0.00645672	0.0637128	0.0646001	0.356859	0.358691	875	0.0194473	0.0128402	0.147636	0.104011	0.0603849	0.0338003	0.0093439	0.00420631	378.6	0.0494929	0.035723	0.12382	0.0977039	0.0198453	0.0111138	0.00448233	0.00579377	0.455838	0.490996	0.252846	0.220608	295	0.00684	0.005777	0.091308	0.074316	0.037591	0.028301	0.148516	0.162592	480.61	0.035055	0.035804	0.058988
391.34	0.146538	0.149964	0.689693	0.68863	0.00289745	0.00405813	0.0288999	0.0297025	0.00634652	0.00645673	0.0635079	0.0646002	0.356387	0.358691	875.2	0.0191345	0.0128865	0.148127	0.104375	0.0600767	0.0339213	0.00861601	0.00422151	378.8	0.049753	0.0358439	0.124664	0.0980063	0.020868	0.0111525	0.00512682	0.00581417	0.456608	0.491426	0.253871	0.221122	295.2	0.00718	0.005797	0.091445	0.074535	0.037971	0.028396	0.149067	0.162908	480.81	0.035047	0.03587	0.059203
391.54	0.146914	0.149964	0.690218	0.68863	0.00319839	0.00405814	0.0293058	0.0297026	0.00655125	0.00645674	0.0640492	0.0646003	0.356573	0.358691	875.4	0.0190495	0.0129328	0.148151	0.104739	0.0596527	0.0340422	0.00800501	0.00423672	379	0.0496547	0.0359648	0.124706	0.0983083	0.0212267	0.0111913	0.00505446	0.00583456	0.456974	0.491853	0.254255	0.221634	295.4	0.006707	0.005817	0.090886	0.074753	0.037391	0.02849	0.149471	0.163222	481.01	0.034448	0.035936	0.059035
391.74	0.147242	0.149964	0.690617	0.68863	0.00356196	0.00405815	0.0295246	0.0297026	0.00644822	0.00645675	0.0643133	0.0646004	0.356824	0.358691	875.6	0.0194149	0.0129791	0.148333	0.105103	0.0599467	0.0341632	0.00811365	0.00425192	379.2	0.0497105	0.0360856	0.124964	0.0986099	0.0213852	0.01123	0.00509043	0.00585495	0.457509	0.492277	0.255002	0.222145	295.6	0.006874	0.005837	0.090161	0.07497	0.037427	0.028584	0.149243	0.163535	481.21	0.03416	0.036002	0.059
391.94	0.147534	0.149964	0.690925	0.68863	0.00394316	0.00405816	0.029263	0.0297027	0.00605311	0.00645677	0.0642942	0.0646005	0.356952	0.358691	875.8	0.0198022	0.0130254	0.148901	0.105466	0.060341	0.0342841	0.00848775	0.00426713	379.4	0.0500723	0.0362063	0.125596	0.0989112	0.0218672	0.0112687	0.0054023	0.00587533	0.457995	0.492696	0.255897	0.222654	295.8	0.006698	0.005857	0.089883	0.075188	0.037549	0.028679	0.149046	0.163847	481.41	0.034265	0.036067	0.059611
392.14	0.14731	0.149964	0.690819	0.68863	0.0036859	0.00405816	0.0286083	0.0297027	0.00567216	0.00645678	0.0638856	0.0646005	0.356865	0.358691	876	0.0203	0.0130717	0.149526	0.10583	0.0607517	0.034405	0.00877324	0.00428233	379.6	0.049814	0.036327	0.125345	0.0992122	0.0213916	0.0113074	0.00475101	0.0058957	0.457769	0.493113	0.255649	0.223162	296	0.006727	0.005877	0.08984	0.075405	0.037305	0.028773	0.149886	0.164157	481.61	0.034046	0.036132	0.05954
392.34	0.146882	0.149964	0.690544	0.68863	0.00330024	0.00405817	0.0281767	0.0297027	0.00511367	0.00645679	0.0629996	0.0646006	0.356549	0.358691	876.2	0.0202732	0.013118	0.149866	0.106193	0.0610533	0.0345259	0.00898188	0.00429753	379.8	0.0492418	0.0364476	0.125357	0.0995128	0.0209585	0.0113461	0.00410762	0.00591608	0.45799	0.493525	0.256109	0.223668	296.2	0.006543	0.005897	0.089855	0.075621	0.03774	0.028867	0.15033	0.164466	481.81	0.034195	0.036197	0.059984
392.54	0.146794	0.149964	0.690522	0.68863	0.00335518	0.00405818	0.0280823	0.0297028	0.00481616	0.0064568	0.0626884	0.0646007	0.356599	0.358691	876.4	0.0207042	0.0131643	0.15041	0.106557	0.0614976	0.0346468	0.00904446	0.00431273	380	0.0494463	0.0365682	0.125513	0.0998131	0.0207502	0.0113847	0.0037381	0.00593644	0.457942	0.493934	0.256783	0.224173	296.4	0.006788	0.005917	0.090346	0.075838	0.038117	0.028961	0.15084	0.164774	482.01	0.033975	0.036261	0.059676
392.74	0.147281	0.149964	0.690271	0.68863	0.00329013	0.00405818	0.0280559	0.0297028	0.00461013	0.00645681	0.0626437	0.0646007	0.35675	0.358691	876.6	0.0206072	0.0132106	0.15046	0.10692	0.0617454	0.0347677	0.00859443	0.00432793	380.2	0.0492855	0.0366887	0.125321	0.100113	0.0204976	0.0114234	0.00339526	0.0059568	0.457647	0.494339	0.256587	0.224676	296.6	0.006693	0.005937	0.090005	0.076054	0.038524	0.029055	0.151401	0.16508	482.21	0.033241	0.036325	0.059979
392.94	0.147548	0.149964	0.689876	0.68863	0.00292751	0.00405819	0.0276715	0.0297029	0.0037145	0.00645682	0.0619944	0.0646008	0.356627	0.358691	876.8	0.0212471	0.0132569	0.151076	0.107283	0.0622372	0.0348885	0.00937183	0.00434313	380.4	0.0493013	0.0368091	0.126031	0.100413	0.0199565	0.011462	0.00349339	0.00597716	0.457901	0.494741	0.257066	0.225178	296.8	0.006483	0.005958	0.090468	0.076269	0.038886	0.029149	0.15196	0.165386	482.41	0.033011	0.036389	0.059647
393.14	0.147512	0.149964	0.689731	0.68863	0.00245344	0.0040582	0.0273202	0.0297029	0.00310393	0.00645683	0.0620826	0.0646009	0.356534	0.358691	877	0.0213797	0.0133031	0.151401	0.107646	0.0621736	0.0350094	0.00932094	0.00435833	380.6	0.0495151	0.0369295	0.126247	0.100712	0.0194934	0.0115007	0.00332072	0.00599751	0.458483	0.49514	0.257507	0.225678	297	0.005932	0.005978	0.090106	0.076485	0.038656	0.029243	0.152312	0.16569	482.61	0.033017	0.036453	0.059757
393.34	0.147577	0.149965	0.689619	0.68863	0.00216711	0.0040582	0.0272175	0.0297029	0.00296189	0.00645684	0.0623711	0.0646009	0.356553	0.358691	877.2	0.0214579	0.0133494	0.151827	0.108009	0.062814	0.0351302	0.00959078	0.00437353	380.8	0.0494986	0.0370498	0.126385	0.101011	0.0186926	0.0115393	0.00270122	0.00601786	0.458905	0.495535	0.257454	0.226176	297.2	0.006159	0.005998	0.090727	0.0767	0.038321	0.029337	0.152879	0.165993	482.81	0.033396	0.036516	0.060731
393.54	0.147383	0.149965	0.689212	0.68863	0.00189095	0.00405821	0.0272663	0.029703	0.00286036	0.00645685	0.062174	0.064601	0.35646	0.358691	877.4	0.021359	0.0133957	0.152379	0.108372	0.0631847	0.035251	0.00963009	0.00438873	381	0.0497914	0.0371701	0.126206	0.101309	0.0183757	0.0115779	0.00216456	0.0060382	0.459236	0.495926	0.257624	0.226673	297.4	0.005951	0.006018	0.090671	0.076914	0.038299	0.029431	0.153494	0.166294	483.01	0.03332	0.036579	0.060297
393.74	0.147207	0.149965	0.688827	0.68863	0.0016342	0.00405822	0.0272666	0.029703	0.00276099	0.00645686	0.0615838	0.064601	0.356492	0.358691	877.6	0.0213906	0.013442	0.153251	0.108735	0.0637454	0.0353719	0.0099458	0.00440393	381.2	0.049498	0.0372902	0.126221	0.101608	0.0181628	0.0116165	0.00155135	0.00605854	0.459304	0.496315	0.257814	0.227169	297.6	0.006511	0.006038	0.091258	0.077129	0.038567	0.029525	0.154307	0.166594	483.21	0.033478	0.036641	0.060916
393.94	0.147228	0.149965	0.688749	0.68863	0.00138917	0.00405822	0.0275588	0.0297031	0.00292117	0.00645686	0.0613295	0.0646011	0.356498	0.358691	877.8	0.0204684	0.0134882	0.153092	0.109097	0.0632204	0.0354926	0.00958982	0.00441912	381.4	0.0500235	0.0374104	0.126678	0.101906	0.0184037	0.0116551	0.00215089	0.00607888	0.4601	0.496699	0.25822	0.227663	297.8	0.00644	0.006058	0.091273	0.077343	0.038205	0.029619	0.15484	0.166893	483.41	0.033788	0.036704	0.061236
394.14	0.1474	0.149965	0.689219	0.68863	0.00186581	0.00405823	0.0280898	0.0297031	0.00320732	0.00645687	0.0621082	0.0646011	0.356925	0.358691	878	0.0203506	0.0135345	0.153814	0.10946	0.0632581	0.0356134	0.0101002	0.00443432	381.6	0.0500144	0.0375304	0.126915	0.102203	0.0181156	0.0116937	0.0020087	0.0060992	0.460514	0.497081	0.258844	0.228156	298	0.006629	0.006078	0.09116	0.077557	0.038302	0.029712	0.155104	0.167191	483.61	0.033819	0.036766	0.060903
394.34	0.147885	0.149965	0.689271	0.68863	0.00236084	0.00405823	0.0286977	0.0297031	0.0040176	0.00645688	0.0626725	0.0646012	0.357237	0.358691	878.2	0.0202684	0.0135808	0.154294	0.109822	0.0632017	0.0357342	0.01025	0.00444951	381.8	0.0498158	0.0376504	0.126492	0.1025	0.0180673	0.0117323	0.00206538	0.00611953	0.460607	0.497459	0.259341	0.228647	298.2	0.006937	0.006098	0.091112	0.07777	0.03909	0.029806	0.15529	0.167488	483.81	0.034812	0.036828	0.061428
394.54	0.14822	0.149965	0.688987	0.68863	0.00239599	0.00405824	0.0288609	0.0297032	0.00427532	0.00645689	0.0627731	0.0646012	0.356881	0.358691	878.4	0.0198544	0.013627	0.154283	0.110185	0.0625	0.0358549	0.00990728	0.00446471	382	0.0499752	0.0377704	0.127069	0.102797	0.018338	0.0117708	0.00257838	0.00613985	0.461126	0.497834	0.26026	0.229136	298.4	0.006741	0.006118	0.091563	0.077983	0.039044	0.0299	0.155251	0.167783	484.01	0.034882	0.036889	0.061241
394.74	0.148544	0.149965	0.688829	0.68863	0.00275375	0.00405824	0.0296806	0.0297032	0.00453632	0.0064569	0.0630931	0.0646013	0.357008	0.358691	878.6	0.0196244	0.0136733	0.154492	0.110547	0.0624497	0.0359757	0.00962462	0.0044799	382.2	0.0503439	0.0378903	0.127543	0.103094	0.0183668	0.0118094	0.00280311	0.00616016	0.461987	0.498206	0.260739	0.229625	298.6	0.007508	0.006138	0.092036	0.078196	0.039286	0.029993	0.155598	0.168077	484.21	0.035693	0.036951	0.061821
394.94	0.148756	0.149965	0.68909	0.68863	0.0029597	0.00405825	0.0300461	0.0297032	0.0049068	0.0064569	0.0632168	0.0646013	0.357327	0.358691	878.8	0.019965	0.0137195	0.155533	0.110909	0.0626986	0.0360964	0.00967373	0.0044951	382.4	0.0502638	0.0380101	0.127374	0.10339	0.0180738	0.0118479	0.00282126	0.00618047	0.462538	0.498575	0.260541	0.230111	298.8	0.007977	0.006158	0.092389	0.078408	0.039826	0.030087	0.155824	0.16837	484.41	0.035977	0.037012	0.062231
395.14	0.148808	0.149965	0.689335	0.68863	0.00311322	0.00405825	0.0302746	0.0297032	0.0054113	0.00645691	0.063542	0.0646014	0.357731	0.358691	879	0.0194396	0.0137658	0.155676	0.111271	0.0619387	0.0362171	0.00938098	0.00451029	382.6	0.0500412	0.0381298	0.12749	0.103686	0.0183508	0.0118864	0.00318872	0.00620078	0.463269	0.49894	0.260893	0.230597	299	0.008124	0.006178	0.092481	0.07862	0.040332	0.03018	0.156159	0.168661	484.61	0.035891	0.037073	0.06253
395.34	0.1492	0.149965	0.690251	0.68863	0.00355715	0.00405825	0.0307759	0.0297033	0.00590496	0.00645692	0.0643562	0.0646014	0.358507	0.358691	879.2	0.0190665	0.013812	0.155652	0.111633	0.0615192	0.0363378	0.00944697	0.00452548	382.8	0.0497736	0.0382495	0.127848	0.103981	0.0184552	0.0119249	0.00284219	0.00622108	0.463465	0.499302	0.26104	0.23108	299.2	0.007808	0.006198	0.091931	0.078832	0.040079	0.030273	0.155596	0.168952	484.81	0.035934	0.037133	0.062853
395.54	0.149447	0.149965	0.69113	0.68863	0.00379205	0.00405826	0.0310567	0.0297033	0.00607666	0.00645692	0.0649294	0.0646014	0.358969	0.358691	879.4	0.0193413	0.0138583	0.156	0.111995	0.0616532	0.0364585	0.00983173	0.00454067	383	0.049508	0.0383692	0.128553	0.104277	0.0185113	0.0119634	0.0025341	0.00624137	0.46443	0.499661	0.261106	0.231563	299.4	0.0073	0.006218	0.091375	0.079044	0.039235	0.030367	0.154878	0.169241	485.01	0.035844	0.037193	0.063046
395.74	0.149384	0.149965	0.691931	0.68863	0.00430618	0.00405826	0.030998	0.0297033	0.00633378	0.00645693	0.0652448	0.0646015	0.359139	0.358691	879.6	0.0194535	0.0139045	0.156572	0.112356	0.0623881	0.0365791	0.0108703	0.00455587	383.2	0.0488924	0.0384887	0.128902	0.104571	0.0181447	0.0120019	0.00218109	0.00626166	0.465171	0.500017	0.261293	0.232043	299.6	0.007288	0.006238	0.091279	0.079255	0.039913	0.03046	0.154229	0.169529	485.21	0.036145	0.037253	0.062963
395.94	0.149182	0.149965	0.692257	0.68863	0.00437388	0.00405827	0.0307729	0.0297033	0.00629502	0.00645693	0.0653645	0.0646015	0.359208	0.358691	879.8	0.020022	0.0139508	0.157136	0.112718	0.0626722	0.0366998	0.0109074	0.00457106	383.4	0.0489072	0.0386082	0.129236	0.104866	0.017997	0.0120404	0.00223864	0.00628195	0.465918	0.50037	0.261343	0.232523	299.8	0.007476	0.006258	0.091548	0.079466	0.040199	0.030553	0.154195	0.169816	485.41	0.036214	0.037313	0.063066
396.14	0.148631	0.149965	0.692247	0.68863	0.00404379	0.00405827	0.0302771	0.0297034	0.00618693	0.00645694	0.0651941	0.0646015	0.359002	0.358691	880	0.0200326	0.013997	0.157489	0.11308	0.0630404	0.0368204	0.0107165	0.00458625	383.6	0.0479613	0.0387277	0.128882	0.10516	0.017367	0.0120789	0.00159282	0.00630223	0.466069	0.50072	0.26086	0.233001	300	0.007787	0.006278	0.092186	0.079676	0.040756	0.030646	0.154806	0.170102	485.61	0.036181	0.037372	0.062432
396.34	0.14885	0.149965	0.692476	0.68863	0.00400337	0.00405827	0.0299181	0.0297034	0.00623543	0.00645695	0.064746	0.0646016	0.35892	0.358691	880.2	0.0203633	0.0140432	0.157945	0.113441	0.0635967	0.036941	0.0107589	0.00460143	383.8	0.0477139	0.0388471	0.129324	0.105454	0.0175717	0.0121173	0.00196842	0.00632251	0.466498	0.501067	0.261612	0.233477	300.2	0.007932	0.006298	0.092576	0.079887	0.041452	0.030739	0.154686	0.170386	485.81	0.035905	0.037432	0.062279
396.54	0.14969	0.149965	0.692704	0.68863	0.00401996	0.00405828	0.0298065	0.0297034	0.00636342	0.00645695	0.064465	0.0646016	0.359265	0.358691	880.4	0.0207252	0.0140895	0.158219	0.113802	0.0639105	0.0370617	0.0106932	0.00461662	384	0.0480256	0.0389664	0.129687	0.105748	0.0177616	0.0121557	0.00200908	0.00634278	0.466805	0.501411	0.262178	0.233952	300.4	0.008112	0.006317	0.093068	0.080097	0.041713	0.030832	0.154662	0.170669	486.01	0.03544	0.037491	0.061614
396.74	0.150235	0.149965	0.692656	0.68863	0.0038845	0.00405828	0.0297223	0.0297034	0.00590924	0.00645696	0.0640224	0.0646016	0.359383	0.358691	880.6	0.0210307	0.0141357	0.158056	0.114164	0.0643945	0.0371823	0.0101623	0.00463181	384.2	0.0481926	0.0390857	0.130145	0.106041	0.0181769	0.0121942	0.00270746	0.00636304	0.467892	0.501752	0.26207	0.234426	300.6	0.008007	0.006337	0.093158	0.080306	0.041913	0.030925	0.155119	0.170951	486.21	0.035653	0.037549	0.061899
396.94	0.150248	0.149965	0.692799	0.68863	0.00408086	0.00405828	0.0294836	0.0297034	0.00539629	0.00645696	0.063812	0.0646017	0.359315	0.358691	880.8	0.0217867	0.0141819	0.158762	0.114525	0.0651778	0.0373028	0.0103083	0.004647	384.4	0.0487684	0.0392049	0.131357	0.106334	0.0183354	0.0122326	0.00295237	0.00638331	0.469481	0.50209	0.26296	0.234898	300.8	0.007374	0.006357	0.09374	0.080516	0.04133	0.031018	0.155503	0.171232	486.41	0.036025	0.037608	0.061861
397.14	0.150196	0.149965	0.693036	0.68863	0.00408414	0.00405829	0.0295039	0.0297035	0.0053042	0.00645697	0.0641795	0.0646017	0.359435	0.358691	881	0.0218135	0.0142282	0.158987	0.114886	0.0656087	0.0374234	0.00986295	0.00466218	384.6	0.049129	0.039324	0.131054	0.106626	0.0183259	0.012271	0.00321859	0.00640356	0.469886	0.502425	0.263559	0.235369	301	0.007198	0.006377	0.093437	0.080725	0.041228	0.031111	0.155664	0.171512	486.61	0.036304	0.037666	0.062101
397.34	0.149755	0.149965	0.692913	0.68863	0.00377274	0.00405829	0.0289185	0.0297035	0.00503135	0.00645697	0.0642581	0.0646017	0.358932	0.358691	881.2	0.0223914	0.0142744	0.159683	0.115247	0.0664758	0.0375439	0.0103078	0.00467737	384.8	0.0492565	0.0394431	0.131369	0.106918	0.018426	0.0123094	0.00319533	0.00642382	0.470693	0.502757	0.26389	0.235838	301.2	0.007064	0.006397	0.093471	0.080933	0.040938	0.031204	0.15574	0.171791	486.81	0.036186	0.037724	0.061996
397.54	0.149599	0.149965	0.692638	0.68863	0.00385943	0.00405829	0.0285791	0.0297035	0.00524775	0.00645697	0.0637425	0.0646017	0.35858	0.358691	881.4	0.0222876	0.0143206	0.160679	0.115608	0.0675877	0.0376645	0.0111516	0.00469255	385	0.0497719	0.0395621	0.13119	0.10721	0.0188414	0.0123478	0.00348658	0.00644406	0.47124	0.503086	0.264228	0.236306	301.4	0.006926	0.006417	0.093569	0.081142	0.040842	0.031297	0.155926	0.172068	487.01	0.035746	0.037781	0.061381
397.74	0.149765	0.149965	0.692569	0.68863	0.00383448	0.00405829	0.0286153	0.0297035	0.00549316	0.00645698	0.063385	0.0646018	0.358783	0.358691	881.6	0.0223987	0.0143668	0.16139	0.115968	0.06781	0.037785	0.0114098	0.00470774	385.2	0.0501702	0.0396811	0.131365	0.107502	0.0191632	0.0123861	0.00401464	0.00646431	0.471921	0.503413	0.264836	0.236773	301.6	0.007797	0.006437	0.093862	0.08135	0.040821	0.031389	0.156557	0.172344	487.21	0.035338	0.037839	0.061472
397.94	0.150009	0.149965	0.6929	0.68863	0.00418989	0.0040583	0.0288468	0.0297035	0.00588654	0.00645698	0.0637221	0.0646018	0.358982	0.358691	881.8	0.0220306	0.014413	0.161452	0.116329	0.0676468	0.0379055	0.0109836	0.00472292	385.4	0.0512264	0.0398	0.132422	0.107793	0.0198319	0.0124245	0.00461906	0.00648455	0.473168	0.503736	0.2659	0.237238	301.8	0.007774	0.006457	0.093817	0.081558	0.040827	0.031482	0.156905	0.17262	487.41	0.035039	0.037896	0.060814
398.14	0.150079	0.149965	0.693064	0.68863	0.00489978	0.0040583	0.0289208	0.0297035	0.00595011	0.00645699	0.0643662	0.0646018	0.359564	0.358691	882	0.0228351	0.0144592	0.162563	0.11669	0.0686483	0.038026	0.011531	0.00473811	385.6	0.0511279	0.0399188	0.132331	0.108084	0.0198527	0.0124628	0.00449704	0.00650478	0.473727	0.504057	0.266363	0.237702	302	0.007986	0.006477	0.094673	0.081765	0.041375	0.031574	0.15709	0.172894	487.61	0.034632	0.037952	0.06053
398.34	0.150427	0.149965	0.692867	0.68863	0.00532104	0.0040583	0.0293303	0.0297036	0.006423	0.00645699	0.0649941	0.0646018	0.360212	0.358691	882.2	0.0226531	0.0145054	0.162693	0.11705	0.0687177	0.0381465	0.0110687	0.00475329	385.8	0.0514851	0.0400376	0.132703	0.108374	0.0204781	0.0125012	0.00496921	0.00652501	0.474437	0.504375	0.267304	0.238164	302.2	0.007696	0.006497	0.094811	0.081972	0.041311	0.031667	0.157461	0.173166	487.81	0.034711	0.038009	0.060618
398.54	0.15025	0.149965	0.692552	0.68863	0.00536103	0.00405831	0.0296359	0.0297036	0.00638683	0.00645699	0.0655429	0.0646019	0.360169	0.358691	882.4	0.0229426	0.0145516	0.16335	0.11741	0.0692732	0.038267	0.0111503	0.00476847	386	0.0527234	0.0401563	0.133766	0.108664	0.0213178	0.0125395	0.00524742	0.00654523	0.475238	0.504691	0.268591	0.238625	302.4	0.007916	0.006517	0.09554	0.082179	0.041087	0.031759	0.157898	0.173438	488.01	0.034509	0.038065	0.060446
398.74	0.149658	0.149965	0.692534	0.68863	0.0052334	0.00405831	0.0297675	0.0297036	0.00645533	0.006457	0.065721	0.0646019	0.360084	0.358691	882.6	0.0227255	0.0145978	0.163869	0.117771	0.0695162	0.0383874	0.0112284	0.00478365	386.2	0.0530412	0.040275	0.133744	0.108954	0.0209195	0.0125778	0.0047801	0.00656545	0.475703	0.505003	0.269386	0.239084	302.6	0.00825	0.006536	0.096021	0.082385	0.041134	0.031852	0.158175	0.173709	488.21	0.035226	0.038122	0.061213
398.94	0.149507	0.149965	0.692996	0.68863	0.00543261	0.00405831	0.0302325	0.0297036	0.00683767	0.006457	0.0658084	0.0646019	0.360242	0.358691	882.8	0.0224033	0.014644	0.16392	0.118131	0.0687192	0.0385079	0.0111449	0.00479883	386.4	0.0532456	0.0403936	0.134138	0.109244	0.0213818	0.0126161	0.00495799	0.00658567	0.476208	0.505313	0.269873	0.239543	302.8	0.008552	0.006556	0.096762	0.082592	0.041518	0.031944	0.158717	0.173978	488.41	0.035693	0.038177	0.061872
399.14	0.149393	0.149965	0.693421	0.68863	0.00524064	0.00405831	0.0305262	0.0297036	0.00708622	0.006457	0.06564	0.0646019	0.360127	0.358691	883	0.0218928	0.0146902	0.163331	0.118491	0.0681	0.0386283	0.010751	0.00481401	386.6	0.054131	0.0405121	0.135131	0.109533	0.0222339	0.0126544	0.00538346	0.00660588	0.477309	0.50562	0.270693	0.239999	303	0.007895	0.006576	0.096452	0.082798	0.041293	0.032036	0.158455	0.174247	488.61	0.036007	0.038233	0.062017
399.34	0.148826	0.149965	0.69331	0.68863	0.00496798	0.00405831	0.0302597	0.0297036	0.00653566	0.00645701	0.0650769	0.064602	0.35971	0.358691	883.2	0.0217636	0.0147364	0.163701	0.118851	0.0677671	0.0387487	0.010681	0.00482919	386.8	0.0537017	0.0406306	0.135715	0.109822	0.0219132	0.0126927	0.00468585	0.00662608	0.477816	0.505925	0.270833	0.240455	303.2	0.008481	0.006596	0.09676	0.083003	0.041553	0.032129	0.158764	0.174514	488.81	0.036925	0.038288	0.062504
399.54	0.148393	0.149965	0.693311	0.68863	0.00486289	0.00405832	0.0303099	0.0297037	0.00640334	0.00645701	0.0649722	0.064602	0.359425	0.358691	883.4	0.021503	0.0147826	0.163821	0.119211	0.0674991	0.0388691	0.0103479	0.00484437	387	0.0536877	0.040749	0.136463	0.11011	0.021831	0.0127309	0.00432332	0.00664628	0.478266	0.506227	0.271508	0.240909	303.4	0.008774	0.006616	0.097225	0.083208	0.041565	0.032221	0.159014	0.17478	489.01	0.037381	0.038343	0.06265
399.74	0.148668	0.149965	0.693779	0.68863	0.00530688	0.00405832	0.0306947	0.0297037	0.00702878	0.00645701	0.0654076	0.064602	0.359846	0.358691	883.6	0.0217543	0.0148288	0.16454	0.11957	0.0675765	0.0389895	0.0103199	0.00485955	387.2	0.0530324	0.0408674	0.13589	0.110399	0.0213606	0.0127692	0.00366236	0.00666648	0.47771	0.506526	0.271707	0.241361	303.6	0.009129	0.006636	0.098214	0.083413	0.04227	0.032313	0.159679	0.175045	489.21	0.037437	0.038398	0.063003
399.94	0.149135	0.149965	0.693783	0.68863	0.00521706	0.00405832	0.0311609	0.0297037	0.00721685	0.00645702	0.0660418	0.064602	0.360583	0.358691	883.8	0.021644	0.014875	0.164655	0.11993	0.0673062	0.0391099	0.00941619	0.00487472	387.4	0.0533908	0.0409857	0.136143	0.110687	0.0211491	0.0128074	0.00315628	0.00668667	0.477526	0.506823	0.271819	0.241813	303.8	0.009371	0.006656	0.098906	0.083618	0.042179	0.032405	0.16051	0.175309	489.41	0.037665	0.038453	0.063408
400.14	0.149653	0.149965	0.693685	0.68863	0.00504719	0.00405832	0.0310787	0.0297037	0.00709784	0.00645702	0.0660331	0.064602	0.360898	0.358691	884	0.0212638	0.0149212	0.164518	0.120289	0.0671814	0.0392303	0.00900466	0.0048899	387.6	0.0533374	0.0411039	0.136017	0.110974	0.0205707	0.0128457	0.00307193	0.00670686	0.477665	0.507117	0.271602	0.242263	304	0.009223	0.006675	0.099299	0.083822	0.042459	0.032497	0.160864	0.175572	489.61	0.03859	0.038507	0.063982
400.34	0.150486	0.149965	0.693773	0.68863	0.00498191	0.00405832	0.0312798	0.0297037	0.00736487	0.00645702	0.0656544	0.064602	0.361342	0.358691	884.2	0.0213807	0.0149674	0.165074	0.120649	0.0672892	0.0393506	0.0091574	0.00490508	387.8	0.0536621	0.0412221	0.136594	0.111261	0.020495	0.0128839	0.00326556	0.00672704	0.477618	0.507409	0.271831	0.242711	304.2	0.009111	0.006695	0.099582	0.084027	0.042577	0.032589	0.161351	0.175834	489.81	0.03872	0.038561	0.06451
400.54	0.1509	0.149965	0.693582	0.68863	0.00496438	0.00405833	0.031598	0.0297037	0.00731269	0.00645703	0.0649663	0.064602	0.361391	0.358691	884.4	0.020996	0.0150135	0.164976	0.121008	0.0673898	0.0394709	0.00828817	0.00492025	388	0.0540687	0.0413402	0.136685	0.111548	0.0205098	0.0129221	0.00314984	0.00674721	0.478094	0.507698	0.271852	0.243158	304.4	0.008746	0.006715	0.099106	0.08423	0.042632	0.032681	0.16177	0.176094	490.01	0.038641	0.038615	0.064529
400.74	0.150685	0.149965	0.69319	0.68863	0.00498067	0.00405833	0.0315341	0.0297037	0.00688533	0.00645703	0.064324	0.0646021	0.360937	0.358691	884.6	0.0210214	0.0150597	0.164881	0.121367	0.067394	0.0395913	0.00749294	0.00493543	388.2	0.0540912	0.0414582	0.136955	0.111835	0.0209572	0.0129603	0.00375653	0.00676739	0.478887	0.507985	0.271963	0.243604	304.6	0.008705	0.006735	0.099355	0.084434	0.042787	0.032773	0.162276	0.176354	490.21	0.038785	0.038669	0.065054
400.94	0.150422	0.149965	0.6929	0.68863	0.00494875	0.00405833	0.0314145	0.0297037	0.00661489	0.00645703	0.0643196	0.0646021	0.360525	0.358691	884.8	0.0209958	0.0151059	0.165625	0.121727	0.0677843	0.0397116	0.00783754	0.0049506	388.4	0.0542344	0.0415762	0.137115	0.112121	0.020672	0.0129985	0.0036544	0.00678755	0.479412	0.508269	0.272605	0.244049	304.8	0.008426	0.006755	0.098939	0.084637	0.042835	0.032864	0.162481	0.176612	490.41	0.038719	0.038722	0.065604
401.14	0.150554	0.149965	0.692591	0.68863	0.00469053	0.00405833	0.0313911	0.0297037	0.00638917	0.00645703	0.0647828	0.0646021	0.360106	0.358691	885	0.0211022	0.0151521	0.166151	0.122086	0.0681901	0.0398319	0.00809969	0.00496577	388.6	0.053965	0.0416941	0.137107	0.112407	0.0204548	0.0130366	0.00432855	0.00680772	0.47939	0.508551	0.273004	0.244492	305	0.008203	0.006775	0.098097	0.08484	0.042587	0.032956	0.162087	0.17687	490.61	0.038002	0.038775	0.065362
401.34	0.150964	0.149965	0.692566	0.68863	0.00464575	0.00405833	0.0308015	0.0297037	0.0063138	0.00645703	0.0648474	0.0646021	0.359584	0.358691	885.2	0.0218763	0.0151982	0.167574	0.122445	0.068804	0.0399521	0.00880624	0.00498095	388.8	0.0545006	0.041812	0.137757	0.112693	0.0210969	0.0130748	0.00492859	0.00682787	0.480365	0.50883	0.273502	0.244934	305.2	0.007866	0.006794	0.097912	0.085042	0.042236	0.033048	0.161734	0.177126	490.81	0.037984	0.038828	0.065384
401.54	0.151164	0.149965	0.692461	0.68863	0.00497998	0.00405833	0.0308204	0.0297038	0.00658492	0.00645704	0.0644652	0.0646021	0.35956	0.358691	885.4	0.0217646	0.0152444	0.168329	0.122803	0.0690881	0.0400724	0.00959796	0.00499612	389	0.0549785	0.0419298	0.137888	0.112978	0.02109	0.0131129	0.00511644	0.00684803	0.480937	0.509107	0.273914	0.245374	305.4	0.007794	0.006814	0.097389	0.085244	0.042013	0.033139	0.161435	0.177381	491.01	0.038286	0.038881	0.065952
401.74	0.151185	0.149965	0.692225	0.68863	0.00496283	0.00405833	0.0305698	0.0297038	0.00636825	0.00645704	0.064355	0.0646021	0.359523	0.358691	885.6	0.0221027	0.0152905	0.169083	0.123162	0.0691923	0.0401927	0.0095118	0.00501129	389.2	0.0552891	0.0420476	0.138329	0.113263	0.021314	0.0131511	0.00544998	0.00686818	0.481829	0.509382	0.274778	0.245814	305.6	0.007778	0.006834	0.096672	0.085446	0.042201	0.033231	0.161265	0.177636	491.21	0.038267	0.038934	0.065453
401.94	0.151459	0.149965	0.692554	0.68863	0.00543317	0.00405834	0.0305686	0.0297038	0.00655713	0.00645704	0.064984	0.0646021	0.35969	0.358691	885.8	0.0222069	0.0153367	0.169735	0.123521	0.0696866	0.0403129	0.00958319	0.00502646	389.4	0.055916	0.0421653	0.138833	0.113547	0.0217259	0.0131892	0.00591892	0.00688832	0.483282	0.509654	0.275531	0.246251	305.8	0.007534	0.006854	0.096356	0.085648	0.042096	0.033322	0.16136	0.177889	491.41	0.037889	0.038986	0.064763
402.14	0.151332	0.149965	0.69238	0.68863	0.00538299	0.00405834	0.0305175	0.0297038	0.00647841	0.00645704	0.0654238	0.0646021	0.359698	0.358691	886	0.0225305	0.0153828	0.17039	0.123879	0.070022	0.0404331	0.00968329	0.00504163	389.6	0.0561738	0.0422829	0.139069	0.113832	0.0217206	0.0132273	0.00671835	0.00690846	0.484033	0.509923	0.276117	0.246688	306	0.007311	0.006873	0.096524	0.085849	0.041985	0.033414	0.160912	0.178141	491.61	0.037988	0.039038	0.064966
402.34	0.150909	0.149965	0.692133	0.68863	0.00509307	0.00405834	0.0302205	0.0297038	0.00643184	0.00645704	0.065864	0.0646022	0.359497	0.358691	886.2	0.0224028	0.015429	0.170607	0.124238	0.0700575	0.0405533	0.00983148	0.0050568	389.8	0.0566936	0.0424005	0.139701	0.114116	0.022521	0.0132654	0.00711231	0.00692859	0.485419	0.510191	0.277431	0.247123	306.2	0.007448	0.006893	0.096093	0.08605	0.041575	0.033505	0.161034	0.178392	491.81	0.0375	0.03909	0.064147
402.54	0.150392	0.149965	0.692249	0.68863	0.00473546	0.00405834	0.0299775	0.0297038	0.00637515	0.00645705	0.0661381	0.0646022	0.359198	0.358691	886.4	0.022632	0.0154752	0.171207	0.124596	0.0704437	0.0406735	0.0101403	0.00507197	390	0.0572909	0.042518	0.139703	0.114399	0.0227926	0.0133035	0.00690796	0.00694872	0.486647	0.510456	0.278227	0.247557	306.4	0.007246	0.006913	0.09656	0.086251	0.041577	0.033597	0.160897	0.178642	492.01	0.037382	0.039141	0.063983
402.74	0.150027	0.149966	0.692756	0.68863	0.00470559	0.00405834	0.0301828	0.0297038	0.00646065	0.00645705	0.0660896	0.0646022	0.359216	0.358691	886.6	0.0224218	0.0155213	0.171141	0.124954	0.0702544	0.0407937	0.0101802	0.00508714	390.2	0.0574495	0.0426354	0.139979	0.114683	0.0225468	0.0133416	0.00708812	0.00696885	0.488099	0.510719	0.278856	0.24799	306.6	0.007366	0.006933	0.096871	0.086452	0.041503	0.033688	0.1612	0.178891	492.21	0.037747	0.039192	0.06383
402.94	0.149623	0.149966	0.693191	0.68863	0.00496605	0.00405834	0.0304885	0.0297038	0.00680799	0.00645705	0.0656795	0.0646022	0.359422	0.358691	886.8	0.0226793	0.0155674	0.171545	0.125313	0.0699745	0.0409139	0.0105433	0.00510231	390.4	0.0573234	0.0427528	0.140393	0.114966	0.0225717	0.0133797	0.00699691	0.00698897	0.488947	0.51098	0.278786	0.248421	306.8	0.007707	0.006952	0.097178	0.086652	0.041364	0.033779	0.161152	0.179139	492.41	0.037854	0.039243	0.063539
403.14	0.149163	0.149966	0.693305	0.68863	0.00483952	0.00405834	0.0306148	0.0297038	0.00697129	0.00645705	0.0651695	0.0646022	0.35934	0.358691	887	0.0229076	0.0156136	0.172136	0.125671	0.070471	0.041034	0.0101116	0.00511747	390.6	0.0572508	0.0428701	0.14051	0.115248	0.0225473	0.0134177	0.00663981	0.00700909	0.489961	0.511238	0.279154	0.248851	307	0.007761	0.006972	0.097056	0.086852	0.041411	0.03387	0.161324	0.179386	492.61	0.037676	0.039294	0.063154
403.34	0.148895	0.149966	0.693178	0.68863	0.00452853	0.00405834	0.0302629	0.0297038	0.00673442	0.00645705	0.0646979	0.0646022	0.359437	0.358691	887.2	0.0230123	0.0156597	0.172484	0.126029	0.0699692	0.0411542	0.0097625	0.00513264	390.8	0.0562769	0.0429874	0.140197	0.115531	0.022177	0.0134558	0.00560547	0.0070292	0.490016	0.511494	0.279115	0.24928	307.2	0.008135	0.006992	0.09748	0.087051	0.041582	0.033961	0.161959	0.179632	492.81	0.037917	0.039345	0.063554
403.54	0.149231	0.149966	0.693872	0.68863	0.00461254	0.00405834	0.0306692	0.0297038	0.0070721	0.00645705	0.0651498	0.0646022	0.359645	0.358691	887.4	0.0231601	0.0157059	0.172063	0.126386	0.0697645	0.0412743	0.00932248	0.0051478	391	0.0563295	0.0431046	0.13999	0.115813	0.0218025	0.0134938	0.005646	0.0070493	0.490002	0.511748	0.27964	0.249707	307.4	0.007954	0.007012	0.097407	0.08725	0.041227	0.034052	0.1619	0.179877	493.01	0.038176	0.039395	0.064047
403.74	0.149227	0.149966	0.693994	0.68863	0.00443441	0.00405835	0.0301536	0.0297038	0.00712715	0.00645706	0.064782	0.0646022	0.359747	0.358691	887.6	0.023529	0.015752	0.172735	0.126744	0.0700537	0.0413944	0.00974071	0.00516297	391.2	0.0559776	0.0432217	0.13931	0.116095	0.0207891	0.0135318	0.00443238	0.0070694	0.489381	0.512	0.279299	0.250133	307.6	0.008262	0.007031	0.098266	0.087449	0.041325	0.034143	0.162744	0.180121	493.21	0.038015	0.039445	0.064357
403.94	0.148488	0.149966	0.693663	0.68863	0.00395591	0.00405835	0.0295286	0.0297038	0.00665416	0.00645706	0.0640635	0.0646022	0.359639	0.358691	887.8	0.0231348	0.0157981	0.172465	0.127102	0.0700432	0.0415145	0.00951269	0.00517813	391.4	0.0564279	0.0433388	0.139504	0.116376	0.020396	0.0135698	0.00389356	0.0070895	0.489722	0.512249	0.279465	0.250558	307.8	0.008144	0.007051	0.098354	0.087648	0.041422	0.034234	0.162985	0.180364	493.41	0.037894	0.039495	0.06424
404.14	0.148284	0.149966	0.693354	0.68863	0.00356632	0.00405835	0.0291875	0.0297038	0.00628595	0.00645706	0.0632893	0.0646022	0.359296	0.358691	888	0.0232584	0.0158442	0.1727	0.127459	0.0701521	0.0416346	0.0103273	0.0051933	391.6	0.056478	0.0434559	0.139349	0.116657	0.0202378	0.0136078	0.00372947	0.00710959	0.489654	0.512497	0.279502	0.250982	308	0.008316	0.007071	0.098098	0.087846	0.041622	0.034325	0.163356	0.180605	493.61	0.038088	0.039545	0.064564
404.34	0.148278	0.149966	0.693012	0.68863	0.0032369	0.00405835	0.0292288	0.0297039	0.00624961	0.00645706	0.0629633	0.0646022	0.358887	0.358691	888.2	0.0238969	0.0158904	0.173423	0.127817	0.0707603	0.0417546	0.010885	0.00520846	391.8	0.0564896	0.0435728	0.139083	0.116938	0.0199524	0.0136458	0.00344945	0.00712968	0.489252	0.512742	0.279407	0.251404	308.2	0.007978	0.007091	0.098359	0.088044	0.041963	0.034416	0.163862	0.180846	493.81	0.037258	0.039595	0.0646
404.54	0.147999	0.149966	0.692491	0.68863	0.00289682	0.00405835	0.0289811	0.0297039	0.00599822	0.00645706	0.0626519	0.0646023	0.358183	0.358691	888.4	0.0242464	0.0159365	0.173323	0.128174	0.0710111	0.0418747	0.0101871	0.00522362	392	0.056048	0.0436897	0.138683	0.117218	0.0197121	0.0136838	0.00300935	0.00714976	0.489302	0.512985	0.279596	0.251825	308.4	0.007765	0.00711	0.098451	0.088242	0.042014	0.034507	0.164053	0.181086	494.01	0.036337	0.039644	0.064053
404.74	0.147961	0.149966	0.692289	0.68863	0.0028608	0.00405835	0.0286689	0.0297039	0.0058275	0.00645706	0.062616	0.0646023	0.35772	0.358691	888.6	0.024711	0.0159826	0.173599	0.128531	0.0712405	0.0419947	0.010834	0.00523878	392.2	0.0559939	0.0438066	0.139242	0.117498	0.0201548	0.0137217	0.00318759	0.00716984	0.489589	0.513226	0.279893	0.252245	308.6	0.008041	0.00713	0.099692	0.088439	0.04209	0.034597	0.164681	0.181325	494.21	0.036319	0.039693	0.064189
404.94	0.148061	0.149966	0.692433	0.68863	0.00288654	0.00405835	0.0285201	0.0297039	0.00578427	0.00645706	0.0630772	0.0646023	0.357493	0.358691	888.8	0.0255011	0.0160287	0.174598	0.128889	0.0720621	0.0421148	0.0108927	0.00525395	392.4	0.0557284	0.0439234	0.139827	0.117778	0.0200828	0.0137597	0.00318012	0.00718991	0.489481	0.513465	0.280244	0.252663	308.8	0.008108	0.00715	0.099869	0.088637	0.042079	0.034688	0.165397	0.181563	494.41	0.036908	0.039742	0.064755
405.14	0.148457	0.149966	0.692544	0.68863	0.00276791	0.00405835	0.0285845	0.0297039	0.00594689	0.00645707	0.0633452	0.0646023	0.357517	0.358691	889	0.0257512	0.0160748	0.175138	0.129246	0.072516	0.0422348	0.0112751	0.00526911	392.6	0.0560332	0.0440401	0.140579	0.118058	0.0209403	0.0137976	0.00372542	0.00720998	0.489582	0.513702	0.280941	0.25308	309	0.00806	0.007169	0.100178	0.088833	0.04199	0.034779	0.165433	0.1818	494.61	0.036582	0.03979	0.064161
405.34	0.148413	0.149966	0.69244	0.68863	0.00275253	0.00405835	0.0287575	0.0297039	0.00596554	0.00645707	0.0634806	0.0646023	0.357411	0.358691	889.2	0.0265442	0.0161209	0.176192	0.129603	0.0727027	0.0423548	0.0115802	0.00528427	392.8	0.0560682	0.0441568	0.140824	0.118337	0.021017	0.0138356	0.00360994	0.00723005	0.489305	0.513937	0.28129	0.253496	309.2	0.007986	0.007189	0.100168	0.08903	0.042197	0.034869	0.165398	0.182036	494.81	0.037899	0.039839	0.064601
405.54	0.148044	0.149966	0.692166	0.68863	0.00281077	0.00405835	0.029132	0.0297039	0.0058408	0.00645707	0.0635107	0.0646023	0.357191	0.358691	889.4	0.0263335	0.016167	0.176306	0.12996	0.0731072	0.0424748	0.0116234	0.00529942	393	0.0557156	0.0442734	0.14091	0.118616	0.0206522	0.0138735	0.00352551	0.00725011	0.489075	0.51417	0.281262	0.253911	309.4	0.00804	0.007209	0.100307	0.089226	0.042306	0.03496	0.165479	0.182271	495.01	0.03866	0.039887	0.065039
405.74	0.147911	0.149966	0.69162	0.68863	0.0027896	0.00405835	0.0286948	0.0297039	0.00607361	0.00645707	0.063849	0.0646023	0.357094	0.358691	889.6	0.0259502	0.0162132	0.177015	0.130316	0.0733624	0.0425948	0.0114867	0.00531458	393.2	0.0558489	0.0443899	0.141064	0.118894	0.0210189	0.0139114	0.00357007	0.00727016	0.489185	0.514401	0.28155	0.254324	309.6	0.008326	0.007228	0.10061	0.089422	0.042585	0.03505	0.165918	0.182505	495.21	0.038513	0.039935	0.065033
405.94	0.148376	0.149966	0.69203	0.68863	0.00331659	0.00405835	0.0290501	0.0297039	0.00657379	0.00645707	0.0648016	0.0646023	0.357374	0.358691	889.8	0.025945	0.0162593	0.177801	0.130673	0.073659	0.0427147	0.0111834	0.00532974	393.4	0.0566641	0.0445064	0.141818	0.119172	0.0212506	0.0139493	0.0042455	0.00729021	0.490331	0.51463	0.282081	0.254737	309.8	0.008381	0.007248	0.101083	0.089618	0.042841	0.035141	0.166427	0.182738	495.41	0.038816	0.039983	0.065602
406.14	0.148399	0.149966	0.692493	0.68863	0.00334998	0.00405836	0.029109	0.0297039	0.00656986	0.00645707	0.0651689	0.0646023	0.357651	0.358691	890	0.025549	0.0163054	0.178346	0.13103	0.0736126	0.0428347	0.0110751	0.0053449	393.6	0.0566952	0.0446228	0.14245	0.11945	0.0214063	0.0139872	0.00448223	0.00731026	0.490235	0.514856	0.282608	0.255148	310	0.008333	0.007268	0.101582	0.089813	0.042541	0.035231	0.166177	0.18297	495.61	0.038873	0.04003	0.065495
406.34	0.148455	0.149966	0.692769	0.68863	0.00333478	0.00405836	0.029029	0.0297039	0.00651228	0.00645707	0.065143	0.0646023	0.358177	0.358691	890.2	0.0252958	0.0163515	0.178844	0.131386	0.0734962	0.0429546	0.0112213	0.00536005	393.8	0.0565583	0.0447392	0.142582	0.119728	0.0218817	0.0140251	0.0043654	0.0073303	0.491028	0.515081	0.28262	0.255557	310.2	0.008515	0.007287	0.101965	0.090008	0.042572	0.035321	0.166815	0.183201	495.81	0.039113	0.040078	0.06542
406.54	0.148901	0.149966	0.693227	0.68863	0.00375607	0.00405836	0.0295983	0.0297039	0.00690742	0.00645707	0.0653695	0.0646023	0.359044	0.358691	890.4	0.0246622	0.0163976	0.179071	0.131742	0.0734981	0.0430745	0.0111636	0.00537521	394	0.0570321	0.0448555	0.14345	0.120005	0.0224231	0.0140629	0.00487033	0.00735033	0.492055	0.515304	0.283452	0.255966	310.4	0.008143	0.007307	0.102441	0.090203	0.042613	0.035411	0.167135	0.183431	496.01	0.039661	0.040125	0.065874
406.74	0.149071	0.149966	0.693538	0.68863	0.00428145	0.00405836	0.0303641	0.0297039	0.00745771	0.00645707	0.0655103	0.0646023	0.35966	0.358691	890.6	0.0244901	0.0164436	0.179205	0.132099	0.0734357	0.0431944	0.0108725	0.00539036	394.2	0.0568666	0.0449717	0.143963	0.120282	0.0220864	0.0141008	0.00492142	0.00737036	0.492655	0.515525	0.283763	0.256373	310.6	0.008849	0.007326	0.102891	0.090398	0.042973	0.035502	0.1676	0.18366	496.21	0.038938	0.040172	0.065669
406.94	0.148981	0.149966	0.693334	0.68863	0.00438093	0.00405836	0.0306644	0.0297039	0.00766908	0.00645707	0.0652042	0.0646023	0.359666	0.358691	890.8	0.024455	0.0164897	0.179862	0.132455	0.0734846	0.0433143	0.011044	0.00540552	394.4	0.0566788	0.0450879	0.144102	0.120559	0.0219597	0.0141386	0.00423578	0.00739039	0.493196	0.515745	0.283585	0.256779	310.8	0.009047	0.007346	0.10328	0.090592	0.043568	0.035592	0.168058	0.183888	496.41	0.038326	0.040219	0.066483
407.14	0.149625	0.149966	0.693537	0.68863	0.00461425	0.00405836	0.0306879	0.0297039	0.00797303	0.00645707	0.065111	0.0646023	0.359908	0.358691	891	0.0235292	0.0165358	0.179841	0.132811	0.0731179	0.0434342	0.010397	0.00542067	394.6	0.0569061	0.0452041	0.144274	0.120835	0.0228766	0.0141764	0.00456525	0.00741041	0.494324	0.515962	0.284221	0.257184	311	0.009345	0.007366	0.103695	0.090786	0.043993	0.035682	0.168984	0.184115	496.61	0.038252	0.040265	0.06672
407.34	0.15016	0.149966	0.693945	0.68863	0.00462447	0.00405836	0.0302504	0.0297039	0.00825261	0.00645708	0.0646671	0.0646023	0.360451	0.358691	891.2	0.0229893	0.0165819	0.179661	0.133167	0.0725087	0.043554	0.00972873	0.00543583	394.8	0.0571201	0.0453201	0.144693	0.121111	0.0229776	0.0142142	0.00460799	0.00743043	0.494775	0.516177	0.284675	0.257587	311.2	0.008912	0.007385	0.103324	0.09098	0.043527	0.035772	0.168595	0.184342	496.81	0.038834	0.040311	0.067326
407.54	0.150628	0.149966	0.6944	0.68863	0.00521537	0.00405836	0.0304655	0.0297039	0.00828439	0.00645708	0.0645504	0.0646023	0.360589	0.358691	891.4	0.0222329	0.016628	0.179672	0.133523	0.0722557	0.0436739	0.0100602	0.00545098	395	0.0570442	0.0454362	0.144984	0.121387	0.0230984	0.014252	0.00458429	0.00745044	0.495492	0.516391	0.285311	0.25799	311.4	0.009571	0.007405	0.103436	0.091173	0.043574	0.035862	0.168644	0.184567	497.01	0.038609	0.040357	0.067846
407.74	0.150529	0.149966	0.694268	0.68863	0.00515869	0.00405836	0.0303333	0.0297039	0.00810319	0.00645708	0.0643072	0.0646024	0.361003	0.358691	891.6	0.0222088	0.016674	0.180437	0.133879	0.0721794	0.0437937	0.010356	0.00546613	395.2	0.0572045	0.0455521	0.145274	0.121662	0.022595	0.0142898	0.00404377	0.00747045	0.49602	0.516602	0.285991	0.258391	311.6	0.009641	0.007425	0.10397	0.091366	0.043763	0.035952	0.168938	0.184791	497.21	0.038102	0.040403	0.067419
407.94	0.150778	0.149966	0.694526	0.68863	0.00513514	0.00405836	0.030591	0.0297039	0.00792523	0.00645708	0.0646746	0.0646024	0.361437	0.358691	891.8	0.022262	0.0167201	0.180502	0.134234	0.0721633	0.0439136	0.0103137	0.00548128	395.4	0.0578895	0.045668	0.145557	0.121937	0.0232485	0.0143276	0.00447027	0.00749045	0.497037	0.516812	0.286671	0.258791	311.8	0.009252	0.007444	0.103589	0.091559	0.043347	0.036041	0.168532	0.185015	497.41	0.038012	0.040449	0.067424
408.14	0.151548	0.149966	0.694682	0.68863	0.00531099	0.00405836	0.0308157	0.0297039	0.00802138	0.00645708	0.0654358	0.0646024	0.361928	0.358691	892	0.0228	0.0167662	0.181048	0.13459	0.0723205	0.0440334	0.0108487	0.00549643	395.6	0.0581639	0.0457838	0.145724	0.122212	0.0234688	0.0143654	0.00504629	0.00751045	0.498144	0.51702	0.287284	0.25919	312	0.009248	0.007464	0.103184	0.091751	0.04303	0.036131	0.168645	0.185237	497.61	0.038221	0.040495	0.067708
408.34	0.1518	0.149966	0.694835	0.68863	0.00547226	0.00405836	0.0309361	0.0297039	0.00819119	0.00645708	0.0659727	0.0646024	0.36241	0.358691	892.2	0.0231751	0.0168123	0.181678	0.134945	0.0727687	0.0441532	0.0108326	0.00551158	395.8	0.0577762	0.0458996	0.145327	0.122486	0.0228858	0.0144031	0.00484035	0.00753044	0.498793	0.517227	0.286786	0.259587	312.2	0.008453	0.007483	0.103646	0.091943	0.043144	0.036221	0.168755	0.185459	497.81	0.038416	0.04054	0.066949
408.54	0.151883	0.149966	0.695258	0.68863	0.00561266	0.00405836	0.0311125	0.0297039	0.00827503	0.00645708	0.066145	0.0646024	0.362736	0.358691	892.4	0.0237348	0.0168583	0.181742	0.135301	0.0728643	0.0442729	0.010619	0.00552673	396	0.0575223	0.0460153	0.145394	0.12276	0.0228534	0.0144409	0.00421977	0.00755043	0.499286	0.517431	0.287046	0.259983	312.4	0.008558	0.007503	0.103542	0.092135	0.04284	0.036311	0.168746	0.18568	498.01	0.038401	0.040585	0.066296
408.74	0.152435	0.149966	0.695379	0.68863	0.00556482	0.00405836	0.0309318	0.0297039	0.00814412	0.00645708	0.066393	0.0646024	0.362684	0.358691	892.6	0.024169	0.0169044	0.182335	0.135656	0.0733104	0.0443927	0.0112894	0.00554188	396.2	0.0577272	0.046131	0.145795	0.123034	0.0234669	0.0144786	0.00445685	0.00757042	0.499936	0.517634	0.286985	0.260379	312.6	0.00887	0.007522	0.104266	0.092327	0.042899	0.0364	0.169343	0.1859	498.21	0.039172	0.04063	0.066525
408.94	0.152363	0.149966	0.695244	0.68863	0.0050777	0.00405836	0.0305403	0.0297039	0.0078341	0.00645708	0.0664906	0.0646024	0.362337	0.358691	892.8	0.0249145	0.0169504	0.183254	0.136011	0.0742765	0.0445125	0.0114955	0.00555703	396.4	0.057418	0.0462466	0.145688	0.123308	0.0232819	0.0145163	0.00388491	0.0075904	0.500097	0.517835	0.287321	0.260773	312.8	0.008973	0.007542	0.103984	0.092518	0.043086	0.03649	0.169576	0.186119	498.41	0.039637	0.040674	0.066095
409.14	0.15171	0.149966	0.694965	0.68863	0.00438977	0.00405836	0.0304808	0.0297039	0.00746549	0.00645708	0.066041	0.0646024	0.362082	0.358691	893	0.0248658	0.0169965	0.183807	0.136366	0.0746338	0.0446322	0.0120137	0.00557218	396.6	0.0582059	0.0463621	0.146027	0.123581	0.0240738	0.014554	0.00409387	0.00761037	0.500566	0.518034	0.287584	0.261165	313	0.009217	0.007562	0.10399	0.092709	0.043729	0.036579	0.169577	0.186337	498.61	0.039458	0.040719	0.065683
409.34	0.15114	0.149966	0.694742	0.68863	0.00416762	0.00405836	0.0306751	0.0297039	0.00724746	0.00645708	0.0664739	0.0646024	0.361713	0.358691	893.2	0.0252232	0.0170426	0.184403	0.136721	0.0750755	0.0447519	0.0117936	0.00558732	396.8	0.0581377	0.0464776	0.145755	0.123854	0.0235284	0.0145917	0.00375824	0.00763034	0.499833	0.518231	0.287431	0.261557	313.2	0.008734	0.007581	0.103814	0.0929	0.043533	0.036669	0.16927	0.186554	498.81	0.040432	0.040763	0.065691
409.54	0.151075	0.149966	0.694634	0.68863	0.00383176	0.00405836	0.0307364	0.0297039	0.00702391	0.00645708	0.0666433	0.0646024	0.361245	0.358691	893.4	0.0254319	0.0170886	0.184703	0.137076	0.0757103	0.0448716	0.0115308	0.00560247	397	0.0585244	0.046593	0.145992	0.124126	0.0240817	0.0146294	0.00433539	0.00765031	0.500007	0.518427	0.287255	0.261947	313.4	0.008748	0.007601	0.104124	0.093091	0.043603	0.036758	0.169542	0.18677	499.01	0.040813	0.040807	0.065919
409.74	0.150707	0.149966	0.694323	0.68863	0.00354708	0.00405836	0.0301202	0.0297039	0.00681386	0.00645708	0.0667792	0.0646024	0.360656	0.358691	893.6	0.025833	0.0171347	0.185165	0.137431	0.0754422	0.0449913	0.0114021	0.00561761	397.2	0.0586216	0.0467084	0.146395	0.124399	0.0239459	0.0146671	0.00437384	0.00767027	0.500539	0.518621	0.287621	0.262336	313.6	0.008627	0.00762	0.103894	0.093281	0.043301	0.036847	0.169864	0.186985	499.21	0.040627	0.040851	0.065811
409.94	0.150484	0.149966	0.694524	0.68863	0.00343655	0.00405836	0.0300394	0.0297039	0.00624562	0.00645708	0.0667761	0.0646024	0.3599	0.358691	893.8	0.0258992	0.0171807	0.185591	0.137786	0.0757625	0.045111	0.0109012	0.00563276	397.4	0.0590503	0.0468237	0.146867	0.124671	0.0235289	0.0147048	0.00484404	0.00769023	0.500883	0.518814	0.288105	0.262724	313.8	0.008566	0.00764	0.103779	0.093471	0.043562	0.036937	0.169939	0.187199	499.41	0.041207	0.040895	0.065938
410.14	0.149979	0.149966	0.694385	0.68863	0.00299185	0.00405836	0.0298782	0.0297039	0.005539	0.00645708	0.0658792	0.0646024	0.359209	0.358691	894	0.0256075	0.0172268	0.185667	0.13814	0.0754754	0.0452307	0.01069	0.0056479	397.6	0.0587645	0.0469389	0.146623	0.124942	0.02365	0.0147424	0.00472101	0.00771018	0.50046	0.519005	0.287893	0.263111	314	0.008266	0.007659	0.104159	0.09366	0.043399	0.037026	0.169699	0.187413	499.61	0.041166	0.040938	0.065685
410.34	0.149639	0.149966	0.693903	0.68863	0.00273809	0.00405836	0.0296738	0.0297039	0.00513463	0.00645708	0.0649183	0.0646024	0.358862	0.358691	894.2	0.0253176	0.0172728	0.185606	0.138495	0.0753213	0.0453503	0.0101136	0.00566305	397.8	0.0586817	0.0470541	0.146545	0.125213	0.023324	0.0147801	0.0048719	0.00773012	0.50077	0.519194	0.287825	0.263497	314.2	0.008663	0.007679	0.104692	0.09385	0.043827	0.037115	0.170006	0.187626	499.81	0.041103	0.040982	0.065902
410.54	0.149508	0.149966	0.693557	0.68863	0.00288016	0.00405836	0.0296411	0.0297039	0.00491871	0.00645709	0.064415	0.0646024	0.358606	0.358691	894.4	0.0248963	0.0173188	0.185318	0.138849	0.0752261	0.04547	0.009542	0.00567819	398	0.0591633	0.0471692	0.147089	0.125484	0.0234853	0.0148177	0.00519281	0.00775007	0.50143	0.519381	0.28882	0.263882	314.4	0.008851	0.007698	0.104965	0.094039	0.044147	0.037204	0.170103	0.187837	500.01	0.040817	0.041025	0.066112
410.74	0.149171	0.149966	0.693267	0.68863	0.00283024	0.00405837	0.02948	0.0297039	0.00456928	0.00645709	0.0640631	0.0646024	0.358064	0.358691	894.6	0.0247229	0.0173649	0.185281	0.139203	0.0752735	0.0455896	0.00918754	0.00569333	398.2	0.0592974	0.0472842	0.147041	0.125755	0.0230582	0.0148553	0.00497622	0.00777	0.501861	0.519567	0.289092	0.264265	314.6	0.009647	0.007718	0.105457	0.094228	0.045261	0.037293	0.170776	0.188048	500.21	0.04017	0.041068	0.0668
410.94	0.14911	0.149966	0.693049	0.68863	0.00272724	0.00405837	0.0290994	0.0297039	0.0043997	0.00645709	0.063692	0.0646024	0.357311	0.358691	894.8	0.0243912	0.0174109	0.185407	0.139558	0.075011	0.0457092	0.00914511	0.00570847	398.4	0.0595798	0.0473993	0.147646	0.126026	0.023184	0.0148929	0.0049502	0.00778994	0.502783	0.519751	0.289675	0.264647	314.8	0.009543	0.007737	0.106056	0.094416	0.045859	0.037382	0.171215	0.188258	500.41	0.040854	0.04111	0.067949
411.14	0.149049	0.149966	0.693077	0.68863	0.00297512	0.00405837	0.0288437	0.0297039	0.00485898	0.00645709	0.0633795	0.0646024	0.357305	0.358691	895	0.0237564	0.0174569	0.185308	0.139912	0.0747111	0.0458288	0.00878705	0.00572361	398.6	0.0596679	0.0475142	0.148071	0.126296	0.0233726	0.0149305	0.00511658	0.00780987	0.503161	0.519934	0.290204	0.265028	315	0.009406	0.007757	0.106015	0.094604	0.045596	0.037471	0.170961	0.188467	500.61	0.041134	0.041153	0.067897
411.34	0.149089	0.149966	0.693629	0.68863	0.00326453	0.00405837	0.0290151	0.0297039	0.00533156	0.00645709	0.0635207	0.0646024	0.357705	0.358691	895.2	0.023629	0.017503	0.185507	0.140266	0.0747843	0.0459484	0.0084694	0.00573875	398.8	0.0602769	0.0476291	0.149194	0.126565	0.0235755	0.0149681	0.00545879	0.00782979	0.504027	0.520115	0.291269	0.265408	315.2	0.009219	0.007776	0.106105	0.094792	0.045646	0.03756	0.17097	0.188676	500.81	0.041018	0.041195	0.06873
411.54	0.149586	0.149966	0.694186	0.68863	0.0038631	0.00405837	0.0296068	0.0297039	0.00575704	0.00645709	0.0641962	0.0646024	0.358099	0.358691	895.4	0.0233094	0.017549	0.185744	0.14062	0.0744277	0.046068	0.00866269	0.00575389	399	0.0603011	0.0477439	0.149505	0.126835	0.0235012	0.0150057	0.00551962	0.00784971	0.505126	0.520295	0.291554	0.265787	315.4	0.009628	0.007796	0.106552	0.09498	0.046083	0.037649	0.171646	0.188883	501.01	0.040398	0.041238	0.069451
411.74	0.149985	0.149966	0.694722	0.68863	0.00411336	0.00405837	0.0301092	0.0297039	0.00621209	0.00645709	0.064877	0.0646024	0.358643	0.358691	895.6	0.0234411	0.017595	0.185917	0.140973	0.0740546	0.0461876	0.00795895	0.00576903	399.2	0.0608369	0.0478587	0.149936	0.127104	0.0230097	0.0150432	0.00604544	0.00786962	0.505963	0.520473	0.292088	0.266165	315.6	0.008916	0.007815	0.106292	0.095167	0.045571	0.037738	0.171575	0.189089	501.21	0.040618	0.04128	0.069884
411.94	0.15044	0.149966	0.69523	0.68863	0.00420211	0.00405837	0.0300607	0.0297039	0.006475	0.00645709	0.0651082	0.0646024	0.359043	0.358691	895.8	0.0232734	0.017641	0.186228	0.141327	0.0743528	0.0463071	0.00857381	0.00578417	399.4	0.0612583	0.0479734	0.150049	0.127373	0.0231532	0.0150808	0.00609642	0.00788953	0.506473	0.520649	0.291991	0.266541	315.8	0.008807	0.007835	0.106256	0.095354	0.045564	0.037827	0.171494	0.189295	501.41	0.040643	0.041321	0.07053
412.14	0.15078	0.149966	0.695378	0.68863	0.0041248	0.00405837	0.0296962	0.0297039	0.00653848	0.00645709	0.0649672	0.0646024	0.359522	0.358691	896	0.0232127	0.017687	0.186846	0.141681	0.0747617	0.0464266	0.00924499	0.00579931	399.6	0.0614589	0.0480881	0.150278	0.127641	0.0231007	0.0151183	0.00634596	0.00790944	0.507494	0.520824	0.292402	0.266916	316	0.009108	0.007854	0.106504	0.095541	0.046296	0.037915	0.171764	0.1895	501.61	0.040982	0.041363	0.070399
412.34	0.150918	0.149966	0.695444	0.68863	0.00393367	0.00405837	0.0298221	0.029704	0.00640877	0.00645709	0.0649209	0.0646024	0.359634	0.358691	896.2	0.0229088	0.0177331	0.186852	0.142034	0.0746274	0.0465462	0.00937804	0.00581445	399.8	0.0615035	0.0482026	0.150209	0.12791	0.0229155	0.0151559	0.00614091	0.00792934	0.507782	0.520998	0.292359	0.267291	316.2	0.008374	0.007874	0.106403	0.095728	0.046048	0.038004	0.171829	0.189704	501.81	0.040774	0.041404	0.069931
412.54	0.150981	0.149966	0.695104	0.68863	0.00324452	0.00405837	0.0294333	0.029704	0.00584226	0.00645709	0.0648207	0.0646024	0.359383	0.358691	896.4	0.0234834	0.0177791	0.187343	0.142388	0.0750325	0.0466657	0.0103833	0.00582958	400	0.0616804	0.0483172	0.150409	0.128178	0.0230584	0.0151934	0.0060684	0.00794923	0.508134	0.52117	0.293237	0.267664	316.4	0.008367	0.007893	0.106203	0.095914	0.046025	0.038093	0.17195	0.189907	502.01	0.040895	0.041446	0.069982
412.74	0.151334	0.149966	0.694792	0.68863	0.00264706	0.00405837	0.0289567	0.029704	0.00546102	0.00645709	0.0655162	0.0646024	0.35936	0.358691	896.6	0.0240054	0.0178251	0.188018	0.142741	0.0754857	0.0467852	0.0111431	0.00584472	400.2	0.0615418	0.0484316	0.15029	0.128445	0.0229606	0.0152309	0.00571611	0.00796912	0.508482	0.52134	0.293417	0.268036	316.6	0.008377	0.007912	0.10601	0.0961	0.046025	0.038181	0.172174	0.190109	502.21	0.041007	0.041487	0.069819
412.94	0.151682	0.149966	0.695113	0.68863	0.00222877	0.00405837	0.0289271	0.029704	0.00560757	0.00645709	0.0655502	0.0646024	0.359535	0.358691	896.8	0.0246528	0.0178711	0.188884	0.143094	0.0764058	0.0469046	0.0119169	0.00585985	400.4	0.0616915	0.0485461	0.150266	0.128713	0.0229258	0.0152684	0.00550962	0.00798901	0.508673	0.521509	0.294018	0.268406	316.8	0.008315	0.007932	0.10563	0.096286	0.046071	0.03827	0.172782	0.190311	502.41	0.040815	0.041527	0.069735
413.14	0.151873	0.149966	0.695161	0.68863	0.00216971	0.00405837	0.0290927	0.029704	0.00566709	0.00645709	0.0653423	0.0646024	0.359943	0.358691	897	0.0247785	0.0179171	0.189534	0.143447	0.0764884	0.0470241	0.0118552	0.00587499	400.6	0.0623319	0.0486604	0.151181	0.12898	0.0239543	0.0153059	0.00649011	0.00800889	0.509146	0.521677	0.294852	0.268776	317	0.008191	0.007951	0.105918	0.096471	0.045866	0.038358	0.173393	0.190511	502.61	0.040263	0.041568	0.069651
413.34	0.152118	0.149966	0.69478	0.68863	0.00222242	0.00405837	0.0289223	0.029704	0.00577453	0.00645709	0.0656041	0.0646024	0.360372	0.358691	897.2	0.0253657	0.0179631	0.190327	0.1438	0.0772006	0.0471436	0.0122459	0.00589012	400.8	0.0618932	0.0487747	0.151023	0.129246	0.0240285	0.0153433	0.00640664	0.00802877	0.508763	0.521843	0.295218	0.269145	317.2	0.007998	0.007971	0.10596	0.096656	0.045551	0.038446	0.173656	0.190711	502.81	0.04091	0.041609	0.069425
413.54	0.152069	0.149966	0.694474	0.68863	0.00191197	0.00405837	0.0285869	0.029704	0.00528925	0.00645709	0.0650088	0.0646024	0.360467	0.358691	897.4	0.0259971	0.0180091	0.190682	0.144153	0.0773794	0.047263	0.0125161	0.00590525	401	0.0613767	0.048889	0.151178	0.129513	0.0243531	0.0153808	0.00663566	0.00804864	0.509207	0.522007	0.295262	0.269512	317.4	0.008734	0.00799	0.106465	0.096841	0.045597	0.038535	0.174468	0.19091	503.01	0.040888	0.041649	0.069452
413.74	0.151923	0.149966	0.694517	0.68863	0.00195105	0.00405837	0.0284509	0.029704	0.00513074	0.00645709	0.0642943	0.0646024	0.360608	0.358691	897.6	0.0263913	0.0180551	0.191408	0.144506	0.077712	0.0473824	0.0128242	0.00592039	401.2	0.0607672	0.0490031	0.151382	0.129779	0.0239812	0.0154182	0.00624736	0.00806851	0.509103	0.522171	0.295998	0.269879	317.6	0.008694	0.00801	0.106174	0.097026	0.045429	0.038623	0.174663	0.191108	503.21	0.040838	0.041689	0.069377
413.94	0.151727	0.149966	0.694425	0.68863	0.00203425	0.00405837	0.0283668	0.029704	0.00507527	0.00645709	0.0635473	0.0646024	0.360623	0.358691	897.8	0.026769	0.0181011	0.191873	0.144859	0.0785254	0.0475018	0.0128618	0.00593552	401.4	0.0606682	0.0491173	0.151501	0.130045	0.0237851	0.0154557	0.0060993	0.00808837	0.508767	0.522332	0.296537	0.270244	317.8	0.008848	0.008029	0.106634	0.09721	0.045618	0.038711	0.175009	0.191305	503.41	0.041362	0.041729	0.069452
414.14	0.151521	0.149966	0.694309	0.68863	0.00218225	0.00405837	0.0280764	0.029704	0.00482685	0.00645709	0.0629736	0.0646024	0.360534	0.358691	898	0.0269182	0.0181471	0.192639	0.145212	0.0786539	0.0476212	0.0123878	0.00595065	401.6	0.0599195	0.0492313	0.151166	0.13031	0.0235809	0.0154931	0.00528911	0.00810823	0.508412	0.522493	0.296306	0.270608	318	0.008597	0.008048	0.106874	0.097394	0.045494	0.038799	0.17477	0.191502	503.61	0.041668	0.041769	0.069559
414.34	0.151657	0.149966	0.69427	0.68863	0.00256337	0.00405837	0.0279879	0.029704	0.00453302	0.00645709	0.0631698	0.0646024	0.360791	0.358691	898.2	0.0272503	0.018193	0.193373	0.145564	0.0790372	0.0477406	0.0126266	0.00596578	401.8	0.0599317	0.0493453	0.151313	0.130575	0.0235398	0.0155305	0.0053927	0.00812808	0.508934	0.522652	0.296922	0.270971	318.2	0.009446	0.008068	0.107229	0.097578	0.045744	0.038887	0.174952	0.191697	503.81	0.041124	0.041809	0.069135
414.54	0.151513	0.149966	0.694552	0.68863	0.00313825	0.00405837	0.0280755	0.029704	0.00468637	0.00645709	0.0633137	0.0646024	0.361068	0.358691	898.4	0.0275436	0.018239	0.194008	0.145917	0.0794135	0.04786	0.0127826	0.00598091	402	0.0603647	0.0494593	0.151681	0.13084	0.0240829	0.0155679	0.00501854	0.00814793	0.509698	0.52281	0.297278	0.271333	318.4	0.009982	0.008087	0.107449	0.097761	0.046218	0.038975	0.175458	0.191892	504.01	0.040973	0.041848	0.06873
414.74	0.151211	0.149966	0.694701	0.68863	0.00347695	0.00405837	0.0285029	0.029704	0.00481927	0.00645709	0.0633212	0.0646024	0.360944	0.358691	898.6	0.0277651	0.018285	0.194582	0.146269	0.0797044	0.0479793	0.0129462	0.00599604	402.2	0.0604874	0.0495732	0.152142	0.131105	0.0241732	0.0156053	0.00520419	0.00816778	0.510319	0.522966	0.297819	0.271694	318.6	0.010368	0.008107	0.107828	0.097945	0.0468	0.039063	0.175863	0.192086	504.21	0.041375	0.041887	0.069
414.94	0.151033	0.149966	0.694746	0.68863	0.00384312	0.00405837	0.0288483	0.029704	0.00501756	0.00645709	0.0633525	0.0646024	0.360914	0.358691	898.8	0.0279643	0.018331	0.195196	0.146621	0.0800843	0.0480987	0.0135778	0.00601117	402.4	0.0601554	0.049687	0.152353	0.131369	0.0241393	0.0156427	0.00475385	0.00818762	0.510697	0.523121	0.297937	0.272054	318.8	0.009928	0.008126	0.107787	0.098128	0.046407	0.039151	0.175484	0.192279	504.41	0.041728	0.041926	0.069008
415.14	0.15084	0.149966	0.695036	0.68863	0.00433201	0.00405837	0.0292963	0.029704	0.00574471	0.00645709	0.063972	0.0646024	0.3614	0.358691	899	0.0283707	0.0183769	0.196156	0.146973	0.0808912	0.048218	0.0135976	0.00602629	402.6	0.0602719	0.0498008	0.152559	0.131633	0.0239259	0.0156801	0.00483634	0.00820745	0.511492	0.523274	0.297968	0.272413	319	0.009523	0.008145	0.107575	0.09831	0.045889	0.039239	0.175598	0.192472	504.61	0.041209	0.041965	0.06895
415.34	0.150835	0.149966	0.695585	0.68863	0.00480036	0.00405837	0.0297407	0.029704	0.00627171	0.00645709	0.0649054	0.0646024	0.361442	0.358691	899.2	0.0284	0.0184229	0.197246	0.147325	0.0811446	0.0483373	0.0135663	0.00604142	402.8	0.0611172	0.0499145	0.153367	0.131897	0.0246909	0.0157174	0.00555134	0.00822728	0.512708	0.523427	0.298497	0.27277	319.2	0.009985	0.008165	0.108245	0.098493	0.046335	0.039327	0.176114	0.192664	504.81	0.041181	0.042004	0.069202
415.54	0.150854	0.149966	0.695676	0.68863	0.00493207	0.00405837	0.0300672	0.029704	0.00655148	0.00645709	0.0653368	0.0646024	0.361247	0.358691	899.4	0.0283436	0.0184689	0.198031	0.147677	0.0813953	0.0484566	0.0135762	0.00605655	403	0.0610878	0.0500281	0.153463	0.13216	0.0249426	0.0157548	0.00546063	0.00824711	0.513426	0.523578	0.29818	0.273127	319.4	0.009893	0.008184	0.108859	0.098675	0.046445	0.039415	0.176161	0.192854	505.01	0.040918	0.042043	0.069366
415.74	0.150842	0.149966	0.695453	0.68863	0.00478832	0.00405837	0.0301726	0.029704	0.0065669	0.00645709	0.0652611	0.0646024	0.361186	0.358691	899.6	0.0284278	0.0185148	0.198699	0.148029	0.0820448	0.0485759	0.0134907	0.00607167	403.2	0.0617377	0.0501417	0.153955	0.132424	0.0250973	0.0157921	0.00569362	0.00826693	0.514141	0.523727	0.298366	0.273482	319.6	0.009582	0.008203	0.108525	0.098857	0.046268	0.039503	0.175675	0.193044	505.21	0.040627	0.042081	0.069462
415.94	0.15082	0.149966	0.69501	0.68863	0.00479756	0.00405837	0.029999	0.029704	0.00654095	0.00645709	0.0648752	0.0646024	0.361198	0.358691	899.8	0.0282965	0.0185608	0.199014	0.148381	0.0825375	0.0486952	0.0142145	0.0060868	403.4	0.0622534	0.0502553	0.154093	0.132686	0.0249858	0.0158294	0.00591312	0.00828675	0.514557	0.523876	0.298265	0.273837	319.8	0.009945	0.008223	0.109045	0.099038	0.047085	0.03959	0.175897	0.193234	505.41	0.040821	0.042119	0.070054
416.14	0.151082	0.149966	0.69502	0.68863	0.00519951	0.00405837	0.0303957	0.029704	0.00694332	0.00645709	0.0654133	0.0646024	0.361355	0.358691	900	0.0280889	0.0186068	0.199304	0.148733	0.0828346	0.0488144	0.014453	0.00610192	403.6	0.0632546	0.0503688	0.154446	0.132949	0.0252798	0.0158667	0.00638736	0.00830656	0.515947	0.524023	0.299209	0.27419	320	0.009964	0.008242	0.109041	0.099219	0.047278	0.039678	0.17623	0.193422	505.61	0.040443	0.042157	0.070402
416.34	0.151195	0.149966	0.694806	0.68863	0.00514409	0.00405837	0.0308611	0.029704	0.00694004	0.00645709	0.0655223	0.0646024	0.361455	0.358691	900.2	0.0281285	0.0186527	0.198794	0.149084	0.0824313	0.0489337	0.0141419	0.00611705	403.8	0.0635478	0.0504822	0.1544	0.133211	0.0249666	0.015904	0.0063989	0.00832637	0.516683	0.524169	0.299595	0.274542	320.2	0.008955	0.008261	0.10836	0.0994	0.046436	0.039765	0.175863	0.19361	505.81	0.040009	0.042195	0.07072
416.54	0.151214	0.149966	0.694807	0.68863	0.00524863	0.00405837	0.0313124	0.029704	0.0070153	0.00645709	0.0659209	0.0646024	0.361961	0.358691	900.4	0.0284585	0.0186987	0.19964	0.149436	0.0827183	0.0490529	0.0148269	0.00613217	404	0.0637336	0.0505956	0.154477	0.133473	0.0247639	0.0159413	0.0062565	0.00834617	0.517421	0.524313	0.299414	0.274894	320.4	0.009427	0.008281	0.108468	0.099581	0.047037	0.039853	0.176083	0.193797	506.01	0.040495	0.042233	0.071226
416.74	0.1516	0.149966	0.694839	0.68863	0.00551974	0.00405837	0.0318638	0.029704	0.00736669	0.00645709	0.0661808	0.0646024	0.36239	0.358691	900.6	0.0282344	0.0187446	0.199857	0.149787	0.0827051	0.0491721	0.0145877	0.00614729	404.2	0.0641293	0.0507089	0.154851	0.133735	0.0250024	0.0159786	0.0060345	0.00836597	0.517938	0.524457	0.29993	0.275244	320.6	0.009409	0.0083	0.108248	0.099762	0.047202	0.03994	0.176627	0.193983	506.21	0.040383	0.04227	0.072153
416.94	0.151993	0.149966	0.694894	0.68863	0.00553964	0.00405837	0.031942	0.029704	0.0077748	0.00645709	0.0653841	0.0646024	0.362575	0.358691	900.8	0.0279137	0.0187906	0.200023	0.150138	0.0829265	0.0492913	0.0145717	0.00616242	404.4	0.0648079	0.0508221	0.155838	0.133996	0.0254691	0.0160159	0.00675707	0.00838576	0.51893	0.524599	0.300575	0.275593	320.8	0.009577	0.008319	0.108874	0.099942	0.047284	0.040028	0.177478	0.194168	506.41	0.04031	0.042308	0.072548
417.14	0.151757	0.149966	0.694225	0.68863	0.00536074	0.00405837	0.0313043	0.029704	0.00762981	0.00645709	0.0648057	0.0646024	0.362724	0.358691	901	0.027371	0.0188365	0.199666	0.150489	0.0828298	0.0494105	0.0141775	0.00617754	404.6	0.0649288	0.0509353	0.156104	0.134257	0.025934	0.0160531	0.00680273	0.00840555	0.519675	0.52474	0.301049	0.275941	321	0.010008	0.008339	0.109172	0.100122	0.047331	0.040115	0.177938	0.194353	506.61	0.039706	0.042345	0.071402
417.34	0.151412	0.149966	0.693519	0.68863	0.00496207	0.00405837	0.0305481	0.029704	0.00733622	0.00645709	0.0645112	0.0646024	0.362801	0.358691	901.2	0.0272568	0.0188825	0.199611	0.15084	0.0832312	0.0495297	0.0141782	0.00619266	404.8	0.0644322	0.0510484	0.155926	0.134518	0.0260208	0.0160904	0.00641117	0.00842533	0.519692	0.524879	0.300618	0.276288	321.2	0.010492	0.008358	0.109461	0.100302	0.047919	0.040202	0.178584	0.194537	506.81	0.040812	0.042382	0.071581
417.54	0.151361	0.149966	0.693406	0.68863	0.0046097	0.00405837	0.0301644	0.029704	0.00704971	0.00645709	0.0642942	0.0646024	0.362881	0.358691	901.4	0.0270436	0.0189284	0.199036	0.151191	0.0831703	0.0496489	0.0137921	0.00620778	405	0.0642218	0.0511615	0.156014	0.134778	0.0256521	0.0161276	0.00614196	0.00844511	0.519738	0.525018	0.301055	0.276634	321.4	0.010806	0.008377	0.10961	0.100481	0.047979	0.04029	0.179317	0.19472	507.01	0.040442	0.042419	0.071524
417.74	0.151326	0.149966	0.693441	0.68863	0.00425508	0.00405837	0.0298044	0.029704	0.0070127	0.00645709	0.0643491	0.0646024	0.362805	0.358691	901.6	0.0272589	0.0189744	0.199125	0.151542	0.0836064	0.049768	0.0136706	0.0062229	405.2	0.0641521	0.0512745	0.156167	0.135038	0.0253462	0.0161648	0.00580439	0.00846489	0.519245	0.525155	0.301595	0.276979	321.6	0.010546	0.008397	0.109671	0.10066	0.048334	0.040377	0.17959	0.194902	507.21	0.040714	0.042456	0.071482
417.94	0.151466	0.149966	0.693495	0.68863	0.00411716	0.00405837	0.0298453	0.029704	0.00729071	0.00645709	0.0647488	0.0646024	0.362417	0.358691	901.8	0.0272059	0.0190203	0.199107	0.151893	0.083527	0.0498872	0.0133283	0.00623802	405.4	0.0640898	0.0513875	0.156198	0.135298	0.0253384	0.016202	0.0059023	0.00848466	0.519351	0.525291	0.301895	0.277323	321.8	0.010364	0.008416	0.109942	0.100839	0.048342	0.040464	0.179803	0.195083	507.41	0.040984	0.042492	0.070952
418.14	0.151621	0.149966	0.693751	0.68863	0.00419815	0.00405837	0.0302014	0.029704	0.00724808	0.00645709	0.0651459	0.0646024	0.362369	0.358691	902	0.0270943	0.0190662	0.199742	0.152244	0.0828281	0.0500063	0.0129081	0.00625313	405.6	0.0641264	0.0515004	0.156112	0.135557	0.0252932	0.0162392	0.00533995	0.00850443	0.51935	0.525426	0.301752	0.277666	322	0.010638	0.008435	0.110266	0.101018	0.048819	0.040551	0.179754	0.195264	507.61	0.040784	0.042529	0.07037
418.34	0.151915	0.149966	0.693888	0.68863	0.0041851	0.00405837	0.0303542	0.029704	0.00682866	0.00645709	0.065594	0.0646024	0.362709	0.358691	902.2	0.027529	0.0191122	0.200248	0.152594	0.0831728	0.0501254	0.0135254	0.00626825	405.8	0.0644547	0.0516132	0.156525	0.135817	0.0258208	0.0162764	0.00576999	0.00852419	0.51977	0.52556	0.302546	0.278007	322.2	0.010913	0.008454	0.110699	0.101196	0.049262	0.040638	0.180316	0.195444	507.81	0.04016	0.042565	0.069289
418.54	0.15171	0.149966	0.69445	0.68863	0.00419819	0.00405837	0.0303777	0.029704	0.00679539	0.00645709	0.0654293	0.0646024	0.363116	0.358691	902.4	0.0274496	0.0191581	0.200636	0.152945	0.0831161	0.0502445	0.0130373	0.00628337	406	0.0645572	0.051726	0.156791	0.136076	0.0262113	0.0163136	0.00591069	0.00854394	0.520021	0.525692	0.302745	0.278348	322.4	0.011101	0.008474	0.111183	0.101374	0.049294	0.040725	0.180692	0.195624	508.01	0.040338	0.042601	0.06821
418.74	0.151721	0.149966	0.694726	0.68863	0.00411691	0.00405837	0.0306708	0.029704	0.00668725	0.00645709	0.0655351	0.0646024	0.363091	0.358691	902.6	0.0271359	0.019204	0.200801	0.153295	0.0831308	0.0503636	0.0126264	0.00629849	406.2	0.0640593	0.0518387	0.156811	0.136334	0.0258673	0.0163508	0.00635119	0.00856369	0.520188	0.525824	0.303437	0.278688	322.6	0.010995	0.008493	0.111149	0.101552	0.04904	0.040812	0.180526	0.195802	508.21	0.041146	0.042637	0.068056
418.94	0.151644	0.149966	0.695039	0.68863	0.00417864	0.00405837	0.0305008	0.029704	0.00677465	0.00645709	0.0661595	0.0646024	0.363203	0.358691	902.8	0.0277781	0.0192499	0.201921	0.153646	0.0836053	0.0504826	0.0128092	0.0063136	406.4	0.064117	0.0519514	0.157129	0.136593	0.0257259	0.0163879	0.00654184	0.00858344	0.520532	0.525954	0.303547	0.279027	322.8	0.011127	0.008512	0.111256	0.101729	0.048814	0.040899	0.180879	0.19598	508.41	0.041397	0.042673	0.067447
419.14	0.15148	0.149966	0.695407	0.68863	0.00431853	0.00405837	0.0301615	0.029704	0.00708918	0.00645709	0.0670167	0.0646024	0.363325	0.358691	903	0.0280662	0.0192958	0.202626	0.153996	0.0835596	0.0506017	0.011988	0.00632872	406.6	0.0644653	0.052064	0.157772	0.136851	0.0258883	0.0164251	0.00710358	0.00860318	0.521122	0.526083	0.303927	0.279364	323	0.011088	0.008532	0.111557	0.101907	0.048674	0.040986	0.180759	0.196157	508.61	0.041731	0.042708	0.067206
419.34	0.151209	0.149966	0.6952	0.68863	0.00407059	0.00405837	0.0297575	0.029704	0.00680787	0.00645709	0.0670705	0.0646024	0.362998	0.358691	903.2	0.0284641	0.0193418	0.203657	0.154346	0.0837954	0.0507207	0.0120986	0.00634383	406.8	0.0647264	0.0521766	0.158281	0.137108	0.0262736	0.0164622	0.00733432	0.00862292	0.5216	0.526211	0.30399	0.279701	323.2	0.011295	0.008551	0.112387	0.102084	0.049377	0.041072	0.181082	0.196333	508.81	0.042153	0.042744	0.067042
419.54	0.151163	0.149966	0.694842	0.68863	0.00345972	0.00405837	0.0294256	0.029704	0.00638232	0.00645709	0.0666304	0.0646024	0.362476	0.358691	903.4	0.0290457	0.0193877	0.204295	0.154696	0.0844307	0.0508398	0.0119656	0.00635894	407	0.0648373	0.0522891	0.158699	0.137366	0.0266453	0.0164993	0.00733067	0.00864266	0.522109	0.526338	0.304805	0.280037	323.4	0.010622	0.00857	0.112299	0.10226	0.049206	0.041159	0.18092	0.196509	509.01	0.041823	0.042779	0.067337
419.74	0.151141	0.149966	0.694738	0.68863	0.00402098	0.00405837	0.0296223	0.029704	0.006063	0.00645709	0.0664749	0.0646024	0.362311	0.358691	903.6	0.0298405	0.0194336	0.205061	0.155046	0.0850177	0.0509588	0.0122538	0.00637406	407.2	0.0654183	0.0524015	0.15909	0.137623	0.0261801	0.0165364	0.00753361	0.00866238	0.52235	0.526464	0.30515	0.280371	323.6	0.011012	0.008589	0.112258	0.102437	0.049457	0.041246	0.181132	0.196684	509.21	0.041758	0.042814	0.067693
419.94	0.151069	0.149966	0.694805	0.68863	0.00462879	0.00405837	0.0297861	0.029704	0.00623644	0.00645709	0.0662074	0.0646024	0.36208	0.358691	903.8	0.0302843	0.0194795	0.205568	0.155396	0.0849025	0.0510778	0.0123328	0.00638917	407.4	0.0650381	0.0525139	0.158598	0.13788	0.0251851	0.0165735	0.00738124	0.00868211	0.522109	0.526589	0.304992	0.280705	323.8	0.010893	0.008608	0.112722	0.102613	0.049833	0.041332	0.181866	0.196858	509.41	0.042058	0.042849	0.068684
420.14	0.151058	0.149966	0.695317	0.68863	0.00494928	0.00405837	0.0300821	0.029704	0.00686768	0.0064571	0.066149	0.0646024	0.362331	0.358691	904	0.030444	0.0195254	0.205712	0.155745	0.084958	0.0511967	0.0122353	0.00640428	407.6	0.0655469	0.0526262	0.158849	0.138137	0.0250068	0.0166106	0.00744832	0.00870183	0.522473	0.526713	0.30546	0.281038	324	0.01055	0.008628	0.112339	0.102789	0.049425	0.041419	0.182086	0.197031	509.61	0.04199	0.042884	0.069116
420.34	0.150395	0.149966	0.695259	0.68863	0.00446574	0.00405837	0.0297723	0.029704	0.00631294	0.0064571	0.0651298	0.0646024	0.362168	0.358691	904.2	0.030563	0.0195713	0.20603	0.156095	0.0846606	0.0513157	0.0119907	0.00641939	407.8	0.0652856	0.0527385	0.158879	0.138393	0.0247855	0.0166477	0.00701734	0.00872154	0.522542	0.526835	0.305807	0.281369	324.2	0.010287	0.008647	0.112408	0.102965	0.049034	0.041506	0.182025	0.197204	509.81	0.042377	0.042918	0.069072
420.54	0.150179	0.149966	0.695371	0.68863	0.00461735	0.00405837	0.0297861	0.029704	0.00609705	0.0064571	0.0646198	0.0646024	0.3618	0.358691	904.4	0.0303296	0.0196172	0.207291	0.156445	0.0846726	0.0514347	0.0120869	0.0064345	408	0.0650721	0.0528507	0.158792	0.138649	0.0243538	0.0166847	0.0067877	0.00874125	0.522886	0.526957	0.305697	0.2817	324.4	0.010258	0.008666	0.112367	0.10314	0.049432	0.041592	0.182237	0.197376	510.01	0.042659	0.042953	0.069833
420.74	0.150264	0.149966	0.695054	0.68863	0.00439633	0.00405837	0.0291365	0.029704	0.00601931	0.0064571	0.063745	0.0646024	0.361131	0.358691	904.6	0.0304823	0.0196631	0.207655	0.156794	0.0849853	0.0515536	0.0120964	0.00644961	408.2	0.0649975	0.0529628	0.158797	0.138905	0.0244357	0.0167218	0.00639934	0.00876096	0.523544	0.527078	0.30637	0.28203	324.6	0.009547	0.008685	0.111973	0.103315	0.048883	0.041678	0.182261	0.197547	510.21	0.04253	0.042987	0.07012
420.94	0.150199	0.149966	0.694835	0.68863	0.00399596	0.00405837	0.0282339	0.029704	0.00604827	0.0064571	0.0632822	0.0646024	0.36059	0.358691	904.8	0.0300768	0.019709	0.207588	0.157143	0.0849227	0.0516725	0.0117415	0.00646472	408.4	0.0645763	0.0530749	0.158441	0.13916	0.0242434	0.0167588	0.00630989	0.00878066	0.524237	0.527197	0.306298	0.282358	324.8	0.00947	0.008705	0.112081	0.10349	0.048703	0.041765	0.182487	0.197718	510.41	0.042587	0.043021	0.069783
421.14	0.1502	0.149966	0.694408	0.68863	0.00393733	0.00405837	0.0277263	0.029704	0.00601583	0.0064571	0.0633482	0.0646024	0.360087	0.358691	905	0.0300936	0.0197549	0.207387	0.157493	0.0852551	0.0517915	0.0120713	0.00647983	408.6	0.064277	0.053187	0.157766	0.139415	0.0240386	0.0167959	0.00614241	0.00880036	0.524735	0.527315	0.306097	0.282686	325	0.00937	0.008724	0.111748	0.103665	0.048905	0.041851	0.182664	0.197888	510.61	0.042198	0.043056	0.069698
421.34	0.150267	0.149966	0.694321	0.68863	0.00413255	0.00405837	0.0277514	0.029704	0.00627683	0.0064571	0.0638699	0.0646024	0.359914	0.358691	905.2	0.0300425	0.0198008	0.207635	0.157842	0.0854616	0.0519104	0.0120014	0.00649494	408.8	0.0642024	0.0532989	0.157784	0.13967	0.0244423	0.0168329	0.00624745	0.00882005	0.525118	0.527433	0.306403	0.283013	325.2	0.009169	0.008743	0.111718	0.103839	0.048462	0.041937	0.18273	0.198057	510.81	0.042808	0.043089	0.070925
421.54	0.150184	0.149966	0.694679	0.68863	0.00402496	0.00405837	0.0278882	0.029704	0.00644766	0.0064571	0.0641249	0.0646024	0.359736	0.358691	905.4	0.0299053	0.0198467	0.208032	0.158191	0.0854359	0.0520293	0.0123365	0.00651004	409	0.0642344	0.0534109	0.15785	0.139925	0.0243492	0.0168699	0.00611005	0.00883974	0.525545	0.527549	0.307204	0.283338	325.4	0.009626	0.008762	0.112084	0.104014	0.049188	0.042023	0.183185	0.198225	511.01	0.042506	0.043123	0.0714
421.74	0.150276	0.149966	0.695007	0.68863	0.00425465	0.00405837	0.0281193	0.029704	0.00668036	0.0064571	0.0640807	0.0646024	0.359812	0.358691	905.6	0.0297891	0.0198925	0.208195	0.15854	0.0853741	0.0521481	0.0125706	0.00652515	409.2	0.063801	0.0535227	0.157574	0.140179	0.024454	0.0169069	0.00567715	0.00885942	0.525963	0.527665	0.307104	0.283663	325.6	0.009738	0.008781	0.112478	0.104187	0.049881	0.04211	0.18372	0.198393	511.21	0.042733	0.043157	0.071173
421.94	0.150597	0.149966	0.695025	0.68863	0.00456747	0.00405837	0.0287085	0.029704	0.00695778	0.0064571	0.0644114	0.0646024	0.359889	0.358691	905.8	0.0296417	0.0199384	0.209071	0.158889	0.0855653	0.052267	0.0128935	0.00654026	409.4	0.0637623	0.0536345	0.157559	0.140433	0.024571	0.0169439	0.00612261	0.0088791	0.526838	0.527779	0.307438	0.283987	325.8	0.009748	0.0088	0.112247	0.104361	0.050071	0.042196	0.183534	0.19856	511.41	0.042517	0.04319	0.070961
422.14	0.150425	0.149966	0.694876	0.68863	0.00464662	0.00405837	0.0292325	0.029704	0.00673168	0.0064571	0.0646483	0.0646024	0.360407	0.358691	906	0.029778	0.0199843	0.209778	0.159237	0.085449	0.0523858	0.0130747	0.00655536	409.6	0.0637517	0.0537463	0.158067	0.140686	0.0246853	0.0169808	0.00559066	0.00889877	0.527673	0.527893	0.307706	0.284309	326	0.009867	0.00882	0.112777	0.104534	0.050565	0.042282	0.183546	0.198727	511.61	0.042322	0.043223	0.070643
422.34	0.150528	0.149966	0.694777	0.68863	0.00458274	0.00405837	0.0294647	0.029704	0.00653048	0.0064571	0.0652881	0.0646024	0.360687	0.358691	906.2	0.0294691	0.0200302	0.210318	0.159586	0.0861249	0.0525047	0.0135528	0.00657047	409.8	0.063644	0.053858	0.158716	0.14094	0.025018	0.0170178	0.00609237	0.00891844	0.528387	0.528005	0.308668	0.284631	326.2	0.010076	0.008839	0.112588	0.104707	0.050898	0.042368	0.184091	0.198892	511.81	0.041977	0.043257	0.070489
422.54	0.150537	0.149966	0.694909	0.68863	0.00484966	0.00405837	0.0297991	0.029704	0.00685625	0.0064571	0.0660847	0.0646024	0.361031	0.358691	906.4	0.0286889	0.0200761	0.210221	0.159935	0.0859156	0.0526235	0.0129557	0.00658557	410	0.0636336	0.0539696	0.159297	0.141193	0.02527	0.0170548	0.00600504	0.0089381	0.52937	0.528117	0.309309	0.284952	326.4	0.010687	0.008858	0.112695	0.10488	0.051071	0.042454	0.184106	0.199057	512.01	0.041796	0.04329	0.070469
422.74	0.150353	0.149966	0.694642	0.68863	0.00511829	0.00405837	0.0300164	0.029704	0.00709437	0.0064571	0.0668085	0.0646024	0.361305	0.358691	906.6	0.0279012	0.0201219	0.210546	0.160283	0.085941	0.0527423	0.0129661	0.00660067	410.2	0.0638111	0.0540812	0.160432	0.141446	0.0257197	0.0170917	0.00605388	0.00895776	0.52998	0.528227	0.309906	0.285272	326.6	0.011426	0.008877	0.113301	0.105053	0.051814	0.042539	0.18459	0.199221	512.21	0.042014	0.043322	0.070812
422.94	0.150284	0.149966	0.69449	0.68863	0.0051381	0.00405837	0.03016	0.029704	0.00710189	0.0064571	0.0674876	0.0646024	0.36158	0.358691	906.8	0.0281949	0.0201678	0.210836	0.160631	0.0863171	0.0528611	0.0133847	0.00661578	410.4	0.0644062	0.0541927	0.161283	0.141698	0.0261985	0.0171286	0.00635313	0.00897742	0.531164	0.528337	0.310075	0.285591	326.8	0.011603	0.008896	0.11353	0.105225	0.051931	0.042625	0.184706	0.199385	512.41	0.042078	0.043355	0.071224
423.14	0.150018	0.149966	0.694391	0.68863	0.00544067	0.00405837	0.0303496	0.029704	0.00696481	0.0064571	0.0679142	0.0646024	0.36212	0.358691	907	0.027984	0.0202136	0.210641	0.16098	0.0861414	0.0529799	0.013344	0.00663088	410.6	0.0644934	0.0543042	0.16231	0.14195	0.0266652	0.0171656	0.006555	0.00899707	0.531996	0.528445	0.310735	0.285909	327	0.011893	0.008915	0.113706	0.105397	0.05201	0.042711	0.184451	0.199548	512.61	0.042241	0.043388	0.071165
423.34	0.149652	0.149966	0.693894	0.68863	0.00501106	0.00405837	0.0304033	0.029704	0.0064905	0.0064571	0.0673542	0.0646025	0.362009	0.358691	907.2	0.0283038	0.0202595	0.211313	0.161328	0.0866034	0.0530986	0.0141371	0.00664598	410.8	0.0649488	0.0544156	0.162822	0.142202	0.0265388	0.0172025	0.00686227	0.00901671	0.5328	0.528553	0.31079	0.286226	327.2	0.011938	0.008934	0.114296	0.105569	0.052141	0.042797	0.184699	0.19971	512.81	0.04203	0.04342	0.071509
423.54	0.149449	0.149966	0.69359	0.68863	0.00467383	0.00405837	0.0306593	0.029704	0.0060688	0.0064571	0.0668063	0.0646025	0.361491	0.358691	907.4	0.0283397	0.0203054	0.211455	0.161676	0.0867072	0.0532174	0.0141065	0.00666108	411	0.0650317	0.0545269	0.163346	0.142454	0.0262849	0.0172394	0.00685137	0.00903636	0.532535	0.52866	0.311499	0.286541	327.4	0.011836	0.008954	0.114407	0.105741	0.051893	0.042882	0.184386	0.199872	513.01	0.041503	0.043452	0.071193
423.74	0.149454	0.149966	0.693865	0.68863	0.005212	0.00405837	0.0310015	0.029704	0.00609676	0.0064571	0.0669374	0.0646025	0.362081	0.358691	907.6	0.0282453	0.0203512	0.21199	0.162024	0.086967	0.0533361	0.014097	0.00667618	411.2	0.0650321	0.0546382	0.163193	0.142705	0.025665	0.0172762	0.0061746	0.00905599	0.531753	0.528766	0.311104	0.286857	327.6	0.012371	0.008973	0.115445	0.105912	0.052136	0.042968	0.18512	0.200033	513.21	0.041096	0.043485	0.070558
423.94	0.149194	0.149966	0.69403	0.68863	0.00480319	0.00405837	0.03056	0.029704	0.00620657	0.0064571	0.0664047	0.0646025	0.362048	0.358691	907.8	0.0281169	0.0203971	0.212676	0.162372	0.0867596	0.0534549	0.0136133	0.00669128	411.4	0.0644857	0.0547495	0.162401	0.142957	0.0248624	0.0173131	0.00574494	0.00907562	0.531301	0.528871	0.310431	0.287171	327.8	0.012221	0.008992	0.116019	0.106083	0.052416	0.043054	0.185776	0.200193	513.41	0.040774	0.043516	0.070287
424.14	0.148773	0.149966	0.694305	0.68863	0.00427505	0.00405837	0.0302498	0.029704	0.00612783	0.0064571	0.0657115	0.0646025	0.361927	0.358691	908	0.0277085	0.0204429	0.212965	0.16272	0.087102	0.0535736	0.0132227	0.00670638	411.6	0.0653159	0.0548606	0.162781	0.143207	0.0251749	0.01735	0.00575751	0.00909525	0.531945	0.528975	0.310878	0.287484	328	0.012743	0.009011	0.116824	0.106254	0.052788	0.043139	0.186022	0.200353	513.61	0.041281	0.043548	0.069379
424.34	0.147984	0.149966	0.694316	0.68863	0.00362882	0.00405837	0.0298379	0.029704	0.00545408	0.0064571	0.0652417	0.0646025	0.361487	0.358691	908.2	0.0275827	0.0204888	0.214044	0.163067	0.087234	0.0536923	0.0130243	0.00672148	411.8	0.0648226	0.0549718	0.162059	0.143458	0.0245584	0.0173868	0.00469978	0.00911487	0.531837	0.529078	0.310668	0.287796	328.2	0.012616	0.00903	0.117082	0.106424	0.052746	0.043225	0.186318	0.200512	513.81	0.040599	0.04358	0.068236
424.54	0.147898	0.149966	0.694277	0.68863	0.00330975	0.00405837	0.0294598	0.029704	0.0053674	0.0064571	0.0651214	0.0646025	0.361228	0.358691	908.4	0.027683	0.0205346	0.214831	0.163415	0.087474	0.053811	0.0129886	0.00673657	412	0.0651006	0.0550828	0.161633	0.143708	0.0240285	0.0174237	0.00485597	0.00913449	0.531884	0.52918	0.309981	0.288107	328.4	0.012225	0.009049	0.116978	0.106594	0.052544	0.04331	0.186014	0.20067	514.01	0.040532	0.043612	0.068496
424.74	0.14807	0.149966	0.69417	0.68863	0.00295267	0.00405837	0.0288491	0.029704	0.00544941	0.0064571	0.0651416	0.0646025	0.361124	0.358691	908.6	0.0280253	0.0205805	0.214698	0.163762	0.0875005	0.0539296	0.0126838	0.00675167	412.2	0.0652571	0.0551938	0.161422	0.143958	0.0243711	0.0174605	0.00503735	0.00915411	0.532073	0.529281	0.310133	0.288418	328.6	0.012367	0.009068	0.117403	0.106764	0.052484	0.043395	0.186183	0.200827	514.21	0.040571	0.043643	0.068134
424.94	0.147823	0.149966	0.694111	0.68863	0.00270581	0.00405837	0.0284135	0.029704	0.00526483	0.0064571	0.0652115	0.0646025	0.36099	0.358691	908.8	0.0277165	0.0206263	0.214881	0.16411	0.0876454	0.0540483	0.0121731	0.00676677	412.4	0.065522	0.0553048	0.161203	0.144208	0.0247573	0.0174973	0.0054647	0.00917372	0.532486	0.529382	0.310127	0.288727	328.8	0.012367	0.009087	0.117498	0.106934	0.052359	0.043481	0.186324	0.200984	514.41	0.040912	0.043674	0.068289
425.14	0.147933	0.149966	0.694554	0.68863	0.00268424	0.00405837	0.0284671	0.029704	0.00504742	0.0064571	0.0647984	0.0646025	0.360864	0.358691	909	0.0281465	0.0206721	0.215198	0.164457	0.087926	0.0541669	0.0125212	0.00678186	412.6	0.0664432	0.0554157	0.161477	0.144457	0.0252559	0.0175341	0.0060358	0.00919332	0.532814	0.529481	0.310559	0.289035	329	0.012704	0.009106	0.117806	0.107104	0.052756	0.043566	0.186799	0.201141	514.61	0.040797	0.043705	0.068297
425.34	0.14803	0.149966	0.694751	0.68863	0.00270176	0.00405837	0.0286319	0.029704	0.00512129	0.0064571	0.0641502	0.0646025	0.36083	0.358691	909.2	0.0280243	0.020718	0.215997	0.164804	0.0880366	0.0542856	0.0122669	0.00679696	412.8	0.066829	0.0555265	0.161628	0.144706	0.0254173	0.0175709	0.00590468	0.00921292	0.533363	0.52958	0.311242	0.289343	329.2	0.012842	0.009125	0.117876	0.107273	0.05237	0.043651	0.187059	0.201296	514.81	0.041211	0.043736	0.068396
425.54	0.147811	0.149966	0.694815	0.68863	0.00244915	0.00405837	0.0283866	0.029704	0.00497003	0.0064571	0.0635557	0.0646025	0.360621	0.358691	909.4	0.0285956	0.0207638	0.216718	0.165151	0.0883092	0.0544042	0.0124874	0.00681205	413	0.0668226	0.0556373	0.161582	0.144955	0.0247744	0.0176077	0.00571816	0.00923252	0.533451	0.529678	0.311158	0.289649	329.4	0.013283	0.009144	0.118177	0.107442	0.053088	0.043736	0.187891	0.201451	515.01	0.04099	0.043767	0.067994
425.74	0.147887	0.149966	0.69473	0.68863	0.00268005	0.00405837	0.0283586	0.029704	0.00506293	0.0064571	0.0635861	0.0646025	0.360801	0.358691	909.6	0.0290515	0.0208096	0.217123	0.165498	0.0892155	0.0545228	0.0127837	0.00682714	413.2	0.0665872	0.055748	0.161404	0.145204	0.0244269	0.0176445	0.00576722	0.00925211	0.533865	0.529775	0.310899	0.289955	329.6	0.012867	0.009163	0.117835	0.107611	0.053056	0.043821	0.187897	0.201606	515.21	0.041425	0.043798	0.067626
425.94	0.148329	0.149966	0.694601	0.68863	0.00283135	0.00405837	0.028777	0.029704	0.00524282	0.0064571	0.06428	0.0646025	0.36102	0.358691	909.8	0.029367	0.0208555	0.217747	0.165845	0.0895342	0.0546414	0.0130742	0.00684224	413.4	0.0666787	0.0558587	0.161259	0.145452	0.0240354	0.0176812	0.00600877	0.00927169	0.534138	0.529871	0.311133	0.29026	329.8	0.012633	0.009182	0.117637	0.107779	0.052911	0.043906	0.187288	0.201759	515.41	0.04111	0.043829	0.067581
426.14	0.148747	0.149966	0.694648	0.68863	0.00301329	0.00405837	0.0295145	0.029704	0.005396	0.0064571	0.0648502	0.0646025	0.361419	0.358691	910	0.0296505	0.0209013	0.218068	0.166192	0.0894037	0.05476	0.0131329	0.00685733	413.6	0.0671076	0.0559693	0.161995	0.1457	0.0241792	0.017718	0.00587601	0.00929127	0.534199	0.529967	0.311152	0.290564	330	0.012296	0.009202	0.117207	0.107947	0.052603	0.043991	0.187283	0.201913	515.61	0.041247	0.043859	0.067492
426.34	0.149208	0.149966	0.694875	0.68863	0.00334623	0.00405837	0.0300992	0.029704	0.00579959	0.0064571	0.0657091	0.0646025	0.3616	0.358691	910.2	0.0295413	0.0209471	0.218375	0.166539	0.0898482	0.0548785	0.0137388	0.00687242	413.8	0.0672538	0.0560798	0.16254	0.145947	0.0247403	0.0177547	0.00631099	0.00931085	0.534857	0.530061	0.312293	0.290867	330.2	0.012077	0.009221	0.116555	0.108115	0.052321	0.044076	0.187422	0.202065	515.81	0.04109	0.043889	0.068669
426.54	0.149665	0.149966	0.695099	0.68863	0.00390498	0.00405837	0.0304866	0.029704	0.00623795	0.0064571	0.0665008	0.0646025	0.361676	0.358691	910.4	0.0295936	0.0209929	0.218523	0.166885	0.0897113	0.0549971	0.0143542	0.00688751	414	0.0674098	0.0561903	0.163612	0.146195	0.0249927	0.0177914	0.00672826	0.00933042	0.535685	0.530155	0.313183	0.291169	330.4	0.012297	0.00924	0.116474	0.108283	0.052021	0.044161	0.18714	0.202217	516.01	0.041314	0.04392	0.069204
426.74	0.149855	0.149966	0.694947	0.68863	0.00378533	0.00405837	0.0308906	0.029704	0.00614878	0.0064571	0.0665208	0.0646025	0.361564	0.358691	910.6	0.0299895	0.0210387	0.219177	0.167232	0.0900615	0.0551156	0.0148356	0.0069026	414.2	0.0678653	0.0563008	0.164487	0.146442	0.0258182	0.0178282	0.00722245	0.00934999	0.536165	0.530248	0.313771	0.29147	330.6	0.012364	0.009259	0.116806	0.108451	0.051675	0.044246	0.187203	0.202368	516.21	0.041514	0.04395	0.069754
426.94	0.150097	0.149966	0.695574	0.68863	0.00386554	0.00405837	0.0312622	0.029704	0.0061458	0.0064571	0.066952	0.0646025	0.361914	0.358691	910.8	0.0306746	0.0210845	0.218948	0.167578	0.0903136	0.0552341	0.0153864	0.00691769	414.4	0.0677815	0.0564112	0.164703	0.146689	0.0256793	0.0178649	0.00728351	0.00936955	0.536958	0.53034	0.314614	0.29177	330.8	0.012006	0.009278	0.116151	0.108618	0.050648	0.044331	0.186793	0.202519	516.41	0.04165	0.043979	0.070407
427.14	0.150468	0.149966	0.69594	0.68863	0.0042221	0.00405837	0.0314565	0.029704	0.00655139	0.0064571	0.0676208	0.0646025	0.362326	0.358691	911	0.0308802	0.0211303	0.219438	0.167925	0.0904182	0.0553526	0.0154691	0.00693278	414.6	0.0672914	0.0565215	0.164847	0.146935	0.0254947	0.0179016	0.00727175	0.00938911	0.537152	0.530432	0.315008	0.292069	331	0.01207	0.009297	0.116341	0.108785	0.050755	0.044415	0.186966	0.202668	516.61	0.042012	0.044009	0.070921
427.34	0.150966	0.149966	0.696061	0.68863	0.00379168	0.00405837	0.0314264	0.029704	0.00654649	0.0064571	0.0678366	0.0646025	0.362415	0.358691	911.2	0.0310083	0.0211762	0.219841	0.168271	0.0908422	0.0554711	0.0156922	0.00694787	414.8	0.0671012	0.0566318	0.164495	0.147182	0.0252529	0.0179382	0.00712605	0.00940867	0.537318	0.530522	0.315064	0.292367	331.2	0.011322	0.009316	0.116345	0.108952	0.049988	0.0445	0.186651	0.202818	516.81	0.041966	0.044039	0.071476
427.54	0.151341	0.149966	0.696266	0.68863	0.00408551	0.00405837	0.0316371	0.029704	0.00664037	0.0064571	0.0682399	0.0646025	0.36273	0.358691	911.4	0.030964	0.021222	0.220516	0.168617	0.0917227	0.0555896	0.0159045	0.00696296	415	0.0668784	0.056742	0.164785	0.147428	0.02542	0.0179749	0.0067258	0.00942822	0.537357	0.530612	0.315691	0.292665	331.4	0.011292	0.009335	0.116708	0.109118	0.049917	0.044585	0.187184	0.202966	517.01	0.041673	0.044068	0.071209
427.74	0.151246	0.149966	0.69647	0.68863	0.00430225	0.00405837	0.0314709	0.029704	0.00661285	0.0064571	0.0683643	0.0646025	0.362887	0.358691	911.6	0.0310706	0.0212678	0.220488	0.168963	0.0919681	0.0557081	0.0154137	0.00697804	415.2	0.0668915	0.0568521	0.164358	0.147673	0.0256333	0.0180116	0.0062587	0.00944776	0.537742	0.530701	0.315532	0.292962	331.6	0.012013	0.009354	0.117927	0.109284	0.050104	0.044669	0.187908	0.203115	517.21	0.04142	0.044098	0.071425
427.94	0.150996	0.149966	0.696464	0.68863	0.00426379	0.00405837	0.0312563	0.029704	0.00619265	0.0064571	0.0682115	0.0646025	0.362232	0.358691	911.8	0.030913	0.0213136	0.220592	0.169309	0.0924391	0.0558265	0.0149777	0.00699313	415.4	0.0673435	0.0569622	0.164514	0.147919	0.0260888	0.0180482	0.00659221	0.0094673	0.538508	0.530789	0.315987	0.293257	331.8	0.011928	0.009373	0.118591	0.10945	0.050411	0.044754	0.188662	0.203262	517.41	0.041731	0.044127	0.071399
428.14	0.151216	0.149966	0.696491	0.68863	0.00452546	0.00405837	0.0315106	0.029704	0.00605565	0.0064571	0.0684434	0.0646025	0.36198	0.358691	912	0.0307299	0.0213593	0.220484	0.169655	0.0925028	0.055945	0.0145055	0.00700822	415.6	0.067794	0.0570723	0.164915	0.148164	0.0262387	0.0180849	0.00620193	0.00948684	0.538801	0.530877	0.316251	0.293552	332	0.012125	0.009392	0.119011	0.109616	0.05064	0.044838	0.189133	0.203409	517.61	0.042516	0.044156	0.071447
428.34	0.15118	0.149966	0.696194	0.68863	0.00455589	0.00405837	0.031505	0.029704	0.0059976	0.0064571	0.0686068	0.0646025	0.361539	0.358691	912.2	0.0303444	0.0214051	0.220438	0.170001	0.0925	0.0560634	0.0141851	0.0070233	415.8	0.0676185	0.0571823	0.164824	0.148409	0.0262817	0.0181215	0.00597867	0.00950637	0.53862	0.530963	0.316155	0.293846	332.2	0.011749	0.009411	0.118887	0.109781	0.050916	0.044923	0.189287	0.203555	517.81	0.042232	0.044185	0.071094
428.54	0.151057	0.149966	0.69599	0.68863	0.00438022	0.00405837	0.0312624	0.029704	0.00587951	0.0064571	0.0684038	0.0646025	0.361219	0.358691	912.4	0.030142	0.0214509	0.22043	0.170347	0.0923044	0.0561818	0.0138341	0.00703839	416	0.0677892	0.0572922	0.165571	0.148653	0.0270812	0.0181581	0.00705649	0.0095259	0.539272	0.531049	0.316515	0.294139	332.4	0.012176	0.00943	0.119369	0.109947	0.051347	0.045007	0.189273	0.203701	518.01	0.042772	0.044214	0.071405
428.74	0.15137	0.149966	0.696387	0.68863	0.0049565	0.00405837	0.0311115	0.029704	0.00583482	0.0064571	0.0681828	0.0646025	0.361053	0.358691	912.6	0.030174	0.0214967	0.220252	0.170692	0.0922087	0.0563002	0.013387	0.00705347	416.2	0.0678831	0.0574021	0.165946	0.148898	0.0276536	0.0181947	0.00680251	0.00954542	0.539787	0.531135	0.31695	0.294431	332.6	0.012255	0.009448	0.119701	0.110112	0.051737	0.045091	0.189548	0.203846	518.21	0.043058	0.044243	0.071246
428.94	0.150994	0.149966	0.696255	0.68863	0.00500489	0.00405837	0.0306289	0.029704	0.00553786	0.0064571	0.067684	0.0646025	0.36064	0.358691	912.8	0.0298234	0.0215425	0.220548	0.171038	0.0924385	0.0564186	0.0130524	0.00706855	416.4	0.0679491	0.0575119	0.166481	0.149142	0.0281222	0.0182313	0.00696009	0.00956494	0.540646	0.531219	0.317496	0.294722	332.8	0.012228	0.009467	0.119842	0.110276	0.051762	0.045176	0.189668	0.20399	518.41	0.043733	0.044271	0.07102
429.14	0.150994	0.149966	0.696238	0.68863	0.00512481	0.00405837	0.0302492	0.029704	0.00546153	0.0064571	0.0669896	0.0646025	0.36066	0.358691	913	0.0297513	0.0215883	0.220473	0.171383	0.0921559	0.056537	0.0127983	0.00708363	416.6	0.0686593	0.0576217	0.167411	0.149386	0.028587	0.0182679	0.00763041	0.00958445	0.541102	0.531303	0.318511	0.295013	333	0.012481	0.009486	0.12043	0.110441	0.052388	0.04526	0.190323	0.204134	518.61	0.043809	0.0443	0.070875
429.34	0.151102	0.149966	0.695763	0.68863	0.00531949	0.00405837	0.0302195	0.029704	0.00569732	0.0064571	0.066581	0.0646025	0.360677	0.358691	913.2	0.0301024	0.0216341	0.221054	0.171728	0.092686	0.0566553	0.0131891	0.00709872	416.8	0.0687473	0.0577314	0.167807	0.149629	0.0282501	0.0183045	0.0075528	0.00960396	0.541418	0.531386	0.318526	0.295302	333.2	0.012109	0.009505	0.120743	0.110605	0.052304	0.045344	0.190261	0.204277	518.81	0.044043	0.044328	0.070469
429.54	0.151047	0.149966	0.696039	0.68863	0.00542754	0.00405837	0.029975	0.029704	0.00625078	0.0064571	0.0669952	0.0646025	0.360806	0.358691	913.4	0.0306326	0.0216798	0.221314	0.172073	0.09275	0.0567737	0.0134124	0.0071138	417	0.0690008	0.057841	0.168385	0.149872	0.028297	0.018341	0.00791887	0.00962346	0.541761	0.531468	0.318809	0.295591	333.4	0.012106	0.009524	0.121125	0.110769	0.052604	0.045428	0.190321	0.20442	519.01	0.044209	0.044356	0.070165
429.74	0.15137	0.149966	0.6965	0.68863	0.00569777	0.00405837	0.029917	0.029704	0.00699158	0.0064571	0.0674408	0.0646025	0.361116	0.358691	913.6	0.0306114	0.0217256	0.221533	0.172419	0.0930574	0.056892	0.0137808	0.00712888	417.2	0.0690162	0.0579506	0.168778	0.150115	0.0288355	0.0183776	0.00802968	0.00964296	0.542217	0.53155	0.318831	0.295878	333.6	0.011709	0.009543	0.120893	0.110933	0.053276	0.045512	0.18998	0.204562	519.21	0.044456	0.044385	0.069993
429.94	0.151737	0.149966	0.696545	0.68863	0.00580845	0.00405837	0.0300217	0.029704	0.00714278	0.0064571	0.0674218	0.0646025	0.361127	0.358691	913.8	0.030286	0.0217714	0.221503	0.172764	0.0925254	0.0570103	0.0139212	0.00714396	417.4	0.0694266	0.0580601	0.169058	0.150358	0.0290718	0.0184141	0.00826615	0.00966246	0.542303	0.531631	0.31922	0.296165	333.8	0.011467	0.009562	0.121309	0.111096	0.05315	0.045596	0.189694	0.204703	519.41	0.04419	0.044413	0.07008
430.14	0.15181	0.149966	0.696511	0.68863	0.00563624	0.00405837	0.0301804	0.029704	0.00691509	0.0064571	0.0670712	0.0646025	0.360915	0.358691	914	0.0306017	0.0218172	0.222135	0.173109	0.0925255	0.0571286	0.014541	0.00715904	417.6	0.0698685	0.0581696	0.170183	0.1506	0.0293094	0.0184506	0.00903132	0.00968195	0.542879	0.531711	0.319617	0.296451	334	0.011371	0.009581	0.121023	0.11126	0.053086	0.04568	0.189736	0.204844	519.61	0.044662	0.04444	0.070367
430.34	0.152027	0.149966	0.696936	0.68863	0.00545327	0.00405837	0.0302545	0.029704	0.00709177	0.0064571	0.0665909	0.0646025	0.360925	0.358691	914.2	0.0310335	0.0218629	0.223338	0.173453	0.0927568	0.0572469	0.0149835	0.00717412	417.8	0.0698773	0.058279	0.170623	0.150842	0.0294803	0.0184872	0.00920082	0.00970143	0.543889	0.531791	0.320483	0.296737	334.2	0.011599	0.0096	0.121598	0.111423	0.053657	0.045764	0.190012	0.204985	519.81	0.044519	0.044468	0.071168
430.54	0.152202	0.149966	0.697065	0.68863	0.00521368	0.00405837	0.030205	0.029704	0.0069476	0.0064571	0.0659548	0.0646025	0.360731	0.358691	914.4	0.0313457	0.0219087	0.224305	0.173798	0.092855	0.0573652	0.0154968	0.00718919	418	0.0697894	0.0583884	0.170549	0.151084	0.028709	0.0185237	0.00880889	0.00972091	0.543868	0.531869	0.320346	0.297021	334.4	0.011955	0.009619	0.121908	0.111586	0.053616	0.045848	0.189932	0.205124	520.01	0.044547	0.044496	0.070865
430.74	0.152308	0.149966	0.696819	0.68863	0.00455624	0.00405837	0.0299995	0.029704	0.00660061	0.0064571	0.0650164	0.0646025	0.360791	0.358691	914.6	0.0315064	0.0219544	0.225236	0.174143	0.0930456	0.0574834	0.0153723	0.00720427	418.2	0.069385	0.0584977	0.169962	0.151326	0.0282434	0.0185602	0.00806947	0.00974039	0.543647	0.531948	0.320488	0.297304	334.6	0.012186	0.009638	0.122034	0.111748	0.053296	0.045932	0.19032	0.205263	520.21	0.044844	0.044523	0.0714
430.94	0.151976	0.149966	0.696941	0.68863	0.00444778	0.00405837	0.0292932	0.029704	0.00667149	0.0064571	0.0645724	0.0646025	0.361435	0.358691	914.8	0.0316699	0.0220002	0.226018	0.174487	0.0932401	0.0576017	0.015587	0.00721935	418.4	0.069084	0.058607	0.169581	0.151567	0.0276624	0.0185966	0.00744134	0.00975986	0.543681	0.532025	0.320874	0.297587	334.8	0.012055	0.009657	0.121828	0.11191	0.05307	0.046016	0.190731	0.205402	520.41	0.044873	0.044551	0.071717
431.14	0.152361	0.149966	0.696946	0.68863	0.00411721	0.00405837	0.0289453	0.029704	0.00642125	0.0064571	0.0640484	0.0646025	0.361652	0.358691	915	0.0324448	0.0220459	0.227597	0.174832	0.0940548	0.0577199	0.0159414	0.00723442	418.6	0.0690018	0.0587162	0.168754	0.151808	0.0273248	0.0186331	0.00692547	0.00977933	0.543701	0.532102	0.320826	0.297869	335	0.012114	0.009676	0.122025	0.112072	0.052942	0.046099	0.190988	0.20554	520.61	0.044635	0.044578	0.071751
431.34	0.152063	0.149966	0.69681	0.68863	0.0036359	0.00405837	0.0284828	0.029704	0.00593581	0.0064571	0.0628403	0.0646025	0.361745	0.358691	915.2	0.0328416	0.0220917	0.228207	0.175176	0.0944742	0.0578381	0.0156798	0.0072495	418.8	0.0691854	0.0588253	0.168857	0.152049	0.027448	0.0186696	0.00695939	0.00979879	0.544269	0.532178	0.321459	0.298149	335.2	0.012548	0.009694	0.122008	0.112234	0.052289	0.046183	0.191494	0.205677	520.81	0.044519	0.044605	0.072196
431.54	0.15156	0.149966	0.696609	0.68863	0.00367108	0.00405837	0.0285365	0.029704	0.00582469	0.0064571	0.0618392	0.0646025	0.361925	0.358691	915.4	0.032956	0.0221374	0.228896	0.17552	0.0949125	0.0579563	0.01586	0.00726457	419	0.0696669	0.0589344	0.168862	0.152289	0.0275318	0.018706	0.00692312	0.00981825	0.544581	0.532253	0.321817	0.298429	335.4	0.013214	0.009713	0.122361	0.112396	0.052314	0.046266	0.192434	0.205814	521.01	0.043904	0.044632	0.073002
431.74	0.151371	0.149966	0.696468	0.68863	0.00359858	0.00405837	0.0286888	0.029704	0.00572893	0.0064571	0.0613353	0.0646025	0.361849	0.358691	915.6	0.0331453	0.0221832	0.228948	0.175864	0.0946282	0.0580746	0.0151001	0.00727965	419.2	0.0701005	0.0590434	0.16832	0.152529	0.0271655	0.0187425	0.0065467	0.0098377	0.544553	0.532328	0.321789	0.298709	335.6	0.013873	0.009732	0.122598	0.112557	0.052009	0.04635	0.192882	0.20595	521.21	0.043795	0.044659	0.073575
431.94	0.151497	0.149966	0.696216	0.68863	0.00360602	0.00405837	0.0287837	0.029704	0.00566786	0.0064571	0.0612346	0.0646025	0.361752	0.358691	915.8	0.0329716	0.0222289	0.229266	0.176208	0.0947696	0.0581927	0.0146359	0.00729472	419.4	0.0703511	0.0591524	0.168613	0.152769	0.0275449	0.0187789	0.0064423	0.00985715	0.545044	0.532403	0.32228	0.298987	335.8	0.013284	0.009751	0.12265	0.112718	0.051944	0.046434	0.193001	0.206086	521.41	0.044158	0.044686	0.073564
432.14	0.151401	0.149966	0.695806	0.68863	0.00364982	0.00405837	0.0289472	0.029704	0.00564422	0.0064571	0.0611698	0.0646025	0.361651	0.358691	916	0.0330542	0.0222747	0.229699	0.176552	0.0942615	0.0583109	0.0141359	0.00730979	419.6	0.070112	0.0592613	0.168145	0.153009	0.0271488	0.0188153	0.00563537	0.0098766	0.545103	0.532476	0.322367	0.299264	336	0.013378	0.00977	0.122463	0.112879	0.052108	0.046517	0.193321	0.206221	521.61	0.043974	0.044712	0.073817
432.34	0.151075	0.149966	0.69574	0.68863	0.00329141	0.00405837	0.0290189	0.029704	0.00523065	0.0064571	0.0613648	0.0646025	0.361603	0.358691	916.2	0.0325532	0.0223204	0.23014	0.176896	0.0943332	0.0584291	0.0137128	0.00732487	419.8	0.0700055	0.0593702	0.168385	0.153248	0.0271865	0.0188517	0.00601314	0.00989604	0.545705	0.532549	0.322693	0.299541	336.2	0.013505	0.009789	0.122673	0.11304	0.052575	0.0466	0.193411	0.206356	521.81	0.043905	0.044739	0.073427
432.54	0.150874	0.149966	0.695838	0.68863	0.0034686	0.00405837	0.029206	0.029704	0.00529458	0.0064571	0.0611018	0.0646025	0.361747	0.358691	916.4	0.0326844	0.0223661	0.230472	0.17724	0.09447	0.0585472	0.0134071	0.00733994	420	0.0698763	0.059479	0.16867	0.153487	0.0272917	0.0188881	0.00602396	0.00991547	0.54634	0.532621	0.323114	0.299817	336.4	0.013625	0.009808	0.122966	0.1132	0.052429	0.046684	0.193551	0.20649	522.01	0.043663	0.044765	0.072961
432.74	0.15123	0.149966	0.696105	0.68863	0.00415924	0.00405837	0.0294151	0.029704	0.00542615	0.0064571	0.0612911	0.0646025	0.361707	0.358691	916.6	0.0329007	0.0224119	0.230707	0.177584	0.0948806	0.0586653	0.0132151	0.00735501	420.2	0.0697873	0.0595878	0.168927	0.153726	0.0273103	0.0189245	0.00521316	0.0099349	0.546284	0.532693	0.323425	0.300092	336.6	0.013437	0.009826	0.123201	0.11336	0.05266	0.046767	0.193485	0.206623	522.21	0.043555	0.044791	0.072769
432.94	0.151023	0.149966	0.695757	0.68863	0.00426042	0.00405837	0.0295143	0.029704	0.00552968	0.0064571	0.0618106	0.0646025	0.361783	0.358691	916.8	0.0328711	0.0224576	0.230894	0.177927	0.0952843	0.0587834	0.0134447	0.00737008	420.4	0.0698232	0.0596965	0.169412	0.153965	0.0280974	0.0189609	0.00575238	0.00995433	0.547141	0.532764	0.324562	0.300366	336.8	0.013178	0.009845	0.123577	0.11352	0.052594	0.04685	0.193414	0.206756	522.41	0.043562	0.044818	0.072315
433.14	0.151163	0.149966	0.695845	0.68863	0.00468949	0.00405837	0.0299704	0.029704	0.00605632	0.0064571	0.0627806	0.0646025	0.362322	0.358691	917	0.0334336	0.0225033	0.231207	0.178271	0.095592	0.0589015	0.0138373	0.00738515	420.6	0.0701078	0.0598051	0.170034	0.154203	0.0291864	0.0189972	0.00596325	0.00997375	0.547825	0.532834	0.325056	0.30064	337	0.012901	0.009864	0.123549	0.11368	0.052437	0.046933	0.193118	0.206888	522.61	0.043045	0.044844	0.071953
433.34	0.151632	0.149966	0.696167	0.68863	0.00516045	0.00405837	0.0307444	0.029704	0.00701231	0.0064571	0.0640962	0.0646025	0.362707	0.358691	917.2	0.0335516	0.0225491	0.231544	0.178614	0.0957796	0.0590196	0.0142766	0.00740022	420.8	0.0697332	0.0599137	0.170477	0.154441	0.0292046	0.0190336	0.00593336	0.00999317	0.548151	0.532904	0.32528	0.300912	337.2	0.012455	0.009883	0.123571	0.113839	0.05195	0.047017	0.192704	0.20702	522.81	0.042562	0.04487	0.071669
433.54	0.152072	0.149966	0.696868	0.68863	0.00578486	0.00405837	0.031483	0.029704	0.00788639	0.0064571	0.0657953	0.0646025	0.363307	0.358691	917.4	0.0329827	0.0225948	0.23143	0.178957	0.0955828	0.0591377	0.0141083	0.00741529	421	0.0697506	0.0600222	0.171101	0.154679	0.0297262	0.0190699	0.00591982	0.0100126	0.548977	0.532974	0.32576	0.301184	337.4	0.011727	0.009902	0.123001	0.113998	0.051972	0.0471	0.192018	0.207152	523.01	0.043033	0.044895	0.071572
433.74	0.152342	0.149966	0.696969	0.68863	0.00607569	0.00405837	0.0321077	0.029704	0.00770787	0.0064571	0.0667876	0.0646025	0.363563	0.358691	917.6	0.0326244	0.0226405	0.231515	0.179301	0.0958835	0.0592558	0.0141606	0.00743035	421.2	0.0696583	0.0601307	0.171576	0.154916	0.0303231	0.0191062	0.00635701	0.010032	0.549111	0.533042	0.325704	0.301455	337.6	0.011148	0.009921	0.122689	0.114157	0.052091	0.047183	0.191854	0.207282	523.21	0.042805	0.044921	0.071568
433.94	0.15213	0.149966	0.696664	0.68863	0.00600446	0.00405837	0.0327048	0.029704	0.00701137	0.0064571	0.0668196	0.0646025	0.363125	0.358691	917.8	0.0328086	0.0226862	0.231695	0.179644	0.0959935	0.0593738	0.0148149	0.00744542	421.4	0.0700887	0.0602391	0.172159	0.155153	0.0302477	0.0191426	0.00693083	0.0100514	0.549374	0.53311	0.32614	0.301725	337.8	0.010426	0.009939	0.122495	0.114316	0.051404	0.047266	0.191075	0.207412	523.41	0.042942	0.044947	0.071781
434.14	0.152177	0.149966	0.696932	0.68863	0.00618061	0.00405837	0.0329985	0.029704	0.00660816	0.0064571	0.0667034	0.0646025	0.362961	0.358691	918	0.0332243	0.0227319	0.232314	0.179987	0.0961834	0.0594918	0.0149385	0.00746049	421.6	0.069895	0.0603475	0.172056	0.15539	0.0296814	0.0191789	0.00623821	0.0100708	0.549036	0.533178	0.325682	0.301994	338	0.010075	0.009958	0.122183	0.114474	0.051542	0.047349	0.190956	0.207542	523.61	0.04339	0.044972	0.071736
434.34	0.152429	0.149966	0.69727	0.68863	0.00635776	0.00405837	0.0331327	0.029704	0.00665775	0.0064571	0.0665398	0.0646025	0.363347	0.358691	918.2	0.0336552	0.0227776	0.232805	0.18033	0.096334	0.0596098	0.0147221	0.00747555	421.8	0.0701647	0.0604558	0.171825	0.155627	0.0293678	0.0192152	0.00573993	0.0100902	0.549725	0.533245	0.325561	0.302262	338.2	0.009775	0.009977	0.122464	0.114633	0.052017	0.047432	0.191146	0.207671	523.81	0.043511	0.044998	0.07148
434.54	0.152076	0.149966	0.696909	0.68863	0.00629419	0.00405837	0.0330592	0.029704	0.00636996	0.0064571	0.0665585	0.0646025	0.363241	0.358691	918.4	0.0336574	0.0228233	0.233101	0.180672	0.0963763	0.0597278	0.0153144	0.00749062	422	0.0700886	0.0605641	0.17142	0.155863	0.0286365	0.0192514	0.00538931	0.0101096	0.549769	0.533311	0.325291	0.30253	338.4	0.009376	0.009996	0.121752	0.114791	0.051536	0.047514	0.19109	0.2078	524.01	0.043355	0.045023	0.071476
434.74	0.151994	0.149966	0.696601	0.68863	0.00585113	0.00405837	0.0326845	0.029704	0.0061443	0.0064571	0.0663792	0.0646025	0.363092	0.358691	918.6	0.0341433	0.022869	0.233779	0.181015	0.0964823	0.0598458	0.0156851	0.00750568	422.2	0.0703493	0.0606723	0.171131	0.156099	0.0287325	0.0192877	0.00572978	0.010129	0.550071	0.533377	0.325766	0.302797	338.6	0.009472	0.010015	0.121341	0.114948	0.051705	0.047597	0.191015	0.207928	524.21	0.043439	0.045048	0.071594
434.94	0.151783	0.149966	0.696695	0.68863	0.005613	0.00405837	0.0321264	0.029704	0.0060156	0.0064571	0.0661844	0.0646025	0.362974	0.358691	918.8	0.0342163	0.0229147	0.234254	0.181358	0.0966752	0.0599638	0.0158855	0.00752075	422.4	0.0709655	0.0607804	0.170794	0.156335	0.0284259	0.019324	0.00565387	0.0101483	0.550096	0.533442	0.325738	0.303063	338.8	0.009551	0.010033	0.121066	0.115106	0.052392	0.04768	0.191666	0.208055	524.41	0.043543	0.045073	0.071711
435.14	0.152123	0.149966	0.697076	0.68863	0.00543953	0.00405837	0.0319839	0.029704	0.00563284	0.0064571	0.0661363	0.0646025	0.362923	0.358691	919	0.0348207	0.0229604	0.234902	0.1817	0.0969004	0.0600818	0.0161166	0.00753581	422.6	0.0713796	0.0608885	0.170622	0.156571	0.0285644	0.0193602	0.00581225	0.0101677	0.550927	0.533506	0.325924	0.303328	339	0.009946	0.010052	0.121325	0.115263	0.052553	0.047763	0.192044	0.208182	524.61	0.043748	0.045098	0.072096
435.34	0.151898	0.149966	0.696799	0.68863	0.00503913	0.00405837	0.0316301	0.029704	0.00542098	0.0064571	0.0659719	0.0646025	0.363044	0.358691	919.2	0.0346762	0.0230061	0.234889	0.182043	0.0968824	0.0601997	0.0158101	0.00755087	422.8	0.0714673	0.0609965	0.170598	0.156806	0.0281958	0.0193965	0.00607107	0.0101871	0.551148	0.53357	0.326143	0.303592	339.2	0.010551	0.010071	0.121702	0.11542	0.053191	0.047845	0.192665	0.208309	524.81	0.044063	0.045123	0.072489
435.54	0.151781	0.149966	0.696579	0.68863	0.0045784	0.00405837	0.031677	0.029704	0.00547451	0.0064571	0.0663511	0.0646025	0.363466	0.358691	919.4	0.0347622	0.0230518	0.235272	0.182385	0.0971078	0.0603177	0.0161597	0.00756593	423	0.071906	0.0611045	0.170173	0.157041	0.027752	0.0194327	0.00557819	0.0102065	0.551472	0.533634	0.326011	0.303856	339.4	0.011087	0.01009	0.122053	0.115577	0.053743	0.047928	0.193157	0.208435	525.01	0.043716	0.045147	0.072469
435.74	0.152012	0.149966	0.696545	0.68863	0.00465075	0.00405837	0.0318408	0.029704	0.00541653	0.0064571	0.0673308	0.0646025	0.363765	0.358691	919.6	0.0348245	0.0230975	0.235685	0.182727	0.096726	0.0604356	0.0159314	0.00758099	423.2	0.072454	0.0612124	0.170106	0.157276	0.0272075	0.0194689	0.00578691	0.0102258	0.551928	0.533697	0.326044	0.304119	339.6	0.011691	0.010108	0.122608	0.115734	0.054405	0.04801	0.193951	0.20856	525.21	0.044088	0.045172	0.072518
435.94	0.15218	0.149966	0.696337	0.68863	0.004417	0.00405837	0.0310104	0.029704	0.00487866	0.0064571	0.0668611	0.0646025	0.363139	0.358691	919.8	0.0346173	0.0231432	0.235789	0.183069	0.096263	0.0605535	0.0158801	0.00759606	423.4	0.0722883	0.0613203	0.170251	0.15751	0.0269787	0.0195051	0.0058835	0.0102452	0.552422	0.533759	0.326548	0.304381	339.8	0.011879	0.010127	0.123393	0.11589	0.055384	0.048093	0.194361	0.208685	525.41	0.044282	0.045196	0.072609
436.14	0.151958	0.149966	0.696203	0.68863	0.00394155	0.00405837	0.0306941	0.029704	0.00426883	0.0064571	0.0663739	0.0646025	0.363144	0.358691	920	0.0346321	0.0231889	0.236302	0.183412	0.0962704	0.0606714	0.0157778	0.00761112	423.6	0.0723118	0.0614281	0.169951	0.157744	0.0266288	0.0195413	0.00554192	0.0102645	0.552628	0.533821	0.327298	0.304642	340	0.011954	0.010146	0.12368	0.116046	0.055635	0.048175	0.195232	0.208809	525.61	0.043344	0.045221	0.072164
436.34	0.152277	0.149966	0.696647	0.68863	0.003909	0.00405837	0.0308046	0.029704	0.00429604	0.0064571	0.0663714	0.0646025	0.36321	0.358691	920.2	0.0344475	0.0232346	0.236916	0.183753	0.0966262	0.0607893	0.0154805	0.00762617	423.8	0.0720432	0.0615359	0.170475	0.157978	0.0257031	0.0195775	0.00588684	0.0102839	0.552756	0.533882	0.327783	0.304903	340.2	0.011785	0.010165	0.124235	0.116202	0.05565	0.048258	0.195465	0.208933	525.81	0.042744	0.045245	0.072011
436.54	0.152482	0.149966	0.696839	0.68863	0.00446835	0.00405837	0.0308882	0.029704	0.00482429	0.0064571	0.0656414	0.0646025	0.362969	0.358691	920.4	0.0347333	0.0232802	0.237011	0.184095	0.0969685	0.0609072	0.0155189	0.00764123	424	0.0719793	0.0616435	0.170841	0.158212	0.0260312	0.0196137	0.00540291	0.0103032	0.553079	0.533943	0.328133	0.305162	340.4	0.012022	0.010183	0.124966	0.116358	0.056261	0.04834	0.19633	0.209056	526.01	0.04227	0.045269	0.071676
436.74	0.152692	0.149966	0.697175	0.68863	0.00477191	0.00405837	0.0308595	0.029704	0.005269	0.0064571	0.0658302	0.0646025	0.362854	0.358691	920.6	0.0349087	0.0233259	0.237347	0.184437	0.0972738	0.061025	0.0152537	0.00765629	424.2	0.0719775	0.0617512	0.171693	0.158446	0.0266008	0.0196498	0.0057621	0.0103226	0.553094	0.534003	0.328577	0.305421	340.6	0.012082	0.010202	0.125042	0.116513	0.056262	0.048422	0.196682	0.209179	526.21	0.042215	0.045293	0.071798
436.94	0.152791	0.149966	0.697327	0.68863	0.00493065	0.00405837	0.0307205	0.029704	0.00580019	0.0064571	0.0665274	0.0646025	0.363191	0.358691	920.8	0.0348306	0.0233716	0.237949	0.184779	0.0975131	0.0611428	0.0155306	0.00767135	424.4	0.0720882	0.0618588	0.17245	0.158679	0.0276685	0.019686	0.00656732	0.0103419	0.554273	0.534063	0.329552	0.305679	340.8	0.011852	0.010221	0.124983	0.116668	0.055849	0.048504	0.196634	0.209301	526.41	0.041708	0.045317	0.071415
437.14	0.153055	0.149966	0.697378	0.68863	0.00512875	0.00405837	0.0306042	0.029704	0.00634115	0.0064571	0.0672296	0.0646025	0.363534	0.358691	921	0.0345895	0.0234173	0.238138	0.18512	0.0973199	0.0612607	0.014941	0.0076864	424.6	0.0720173	0.0619663	0.173155	0.158912	0.0281545	0.0197221	0.00675822	0.0103612	0.554677	0.534122	0.329698	0.305937	341	0.012029	0.01024	0.125205	0.116823	0.056057	0.048587	0.197568	0.209423	526.61	0.041175	0.045341	0.071336
437.34	0.153415	0.149966	0.69772	0.68863	0.00557015	0.00405837	0.030903	0.029704	0.0069761	0.0064571	0.0679926	0.0646025	0.363707	0.358691	921.2	0.034213	0.0234629	0.238552	0.185462	0.0975594	0.0613785	0.0147305	0.00770146	424.8	0.0717915	0.0620738	0.173302	0.159144	0.0277311	0.0197583	0.0067538	0.0103806	0.554329	0.534181	0.329668	0.306193	341.2	0.012177	0.010258	0.125219	0.116978	0.055877	0.048669	0.197689	0.209544	526.81	0.040815	0.045365	0.071609
437.54	0.153494	0.149966	0.698162	0.68863	0.00576405	0.00405837	0.0311774	0.029704	0.00674208	0.0064571	0.0682342	0.0646025	0.363759	0.358691	921.4	0.0340842	0.0235086	0.239108	0.185803	0.0978658	0.0614963	0.0148498	0.00771652	425	0.0719633	0.0621812	0.174052	0.159377	0.0281658	0.0197944	0.00702612	0.0103999	0.554437	0.534239	0.330212	0.306449	341.4	0.011653	0.010277	0.125087	0.117132	0.05594	0.048751	0.197658	0.209665	527.01	0.040989	0.045388	0.071858
437.74	0.153031	0.149966	0.698088	0.68863	0.00545966	0.00405837	0.0309924	0.029704	0.00636291	0.0064571	0.0677185	0.0646025	0.363527	0.358691	921.6	0.0342524	0.0235543	0.239799	0.186145	0.0982948	0.0616141	0.0148591	0.00773157	425.2	0.0720073	0.0622886	0.174585	0.159609	0.0283417	0.0198305	0.00747952	0.0104192	0.554556	0.534297	0.330316	0.306704	341.6	0.011607	0.010296	0.12547	0.117287	0.055979	0.048833	0.197964	0.209786	527.21	0.040927	0.045412	0.07226
437.94	0.152648	0.149966	0.69809	0.68863	0.00558103	0.00405837	0.0310351	0.029704	0.00665048	0.0064571	0.0669009	0.0646025	0.36364	0.358691	921.8	0.0344274	0.0235999	0.239938	0.186486	0.0984695	0.0617319	0.0150549	0.00774663	425.4	0.0723614	0.0623959	0.17449	0.159841	0.0281564	0.0198666	0.00735045	0.0104385	0.554968	0.534354	0.330472	0.306958	341.8	0.011264	0.010314	0.125591	0.117441	0.055799	0.048915	0.198009	0.209905	527.41	0.041104	0.045435	0.072029
438.14	0.152727	0.149966	0.698842	0.68863	0.00592232	0.00405837	0.0312891	0.029704	0.00712841	0.0064571	0.0664044	0.0646025	0.364394	0.358691	922	0.034562	0.0236456	0.240247	0.186827	0.0984742	0.0618496	0.0148739	0.00776168	425.6	0.0722841	0.0625032	0.174418	0.160072	0.0276768	0.0199027	0.00672596	0.0104578	0.554738	0.534411	0.330131	0.307212	342	0.011119	0.010333	0.125909	0.117594	0.055674	0.048997	0.198276	0.210025	527.61	0.041783	0.045459	0.072015
438.34	0.152816	0.149966	0.698951	0.68863	0.00573713	0.00405837	0.0314021	0.029704	0.00712117	0.0064571	0.0659872	0.0646025	0.364908	0.358691	922.2	0.0350186	0.0236912	0.240479	0.187168	0.0986856	0.0619674	0.014902	0.00777673	425.8	0.0725813	0.0626104	0.174917	0.160303	0.0277409	0.0199388	0.00757195	0.0104771	0.556275	0.534467	0.330631	0.307464	342.2	0.011397	0.010352	0.12645	0.117748	0.055798	0.049079	0.19876	0.210143	527.81	0.042075	0.045482	0.071982
438.54	0.152556	0.149966	0.698484	0.68863	0.00530119	0.00405837	0.0313877	0.029704	0.00698991	0.0064571	0.0656222	0.0646025	0.364604	0.358691	922.4	0.0350634	0.0237369	0.241105	0.187509	0.0984579	0.0620851	0.0150449	0.00779178	426	0.0726679	0.0627175	0.174886	0.160535	0.0276184	0.0199748	0.00760524	0.0104964	0.55654	0.534523	0.330762	0.307716	342.4	0.011391	0.01037	0.126546	0.117901	0.055726	0.049161	0.19848	0.210262	528.01	0.04267	0.045505	0.072956
438.74	0.152381	0.149966	0.698184	0.68863	0.0048237	0.00405837	0.0313777	0.029704	0.00682432	0.0064571	0.0653627	0.0646025	0.364207	0.358691	922.6	0.0351093	0.0237825	0.241475	0.18785	0.0989441	0.0622028	0.0147684	0.00780683	426.2	0.0728414	0.0628246	0.174598	0.160765	0.0281678	0.0200109	0.00763327	0.0105157	0.556601	0.534578	0.330958	0.307967	342.6	0.011264	0.010389	0.126805	0.118054	0.055663	0.049242	0.198189	0.210379	528.21	0.043675	0.045528	0.073046
438.94	0.152164	0.149966	0.69803	0.68863	0.00452593	0.00405837	0.0312484	0.029704	0.00664663	0.0064571	0.065414	0.0646025	0.364106	0.358691	922.8	0.0348318	0.0238282	0.241843	0.18819	0.0989453	0.0623205	0.0148477	0.00782189	426.4	0.0731167	0.0629317	0.17476	0.160996	0.0281965	0.0200469	0.00706528	0.010535	0.557117	0.534633	0.331071	0.308218	342.8	0.011252	0.010408	0.12691	0.118207	0.055713	0.049324	0.198612	0.210497	528.41	0.044341	0.045551	0.073018
439.14	0.15203	0.149966	0.697694	0.68863	0.00408619	0.00405837	0.0309632	0.029704	0.00624411	0.0064571	0.0653689	0.0646025	0.364285	0.358691	923	0.034996	0.0238738	0.242201	0.188531	0.0995015	0.0624382	0.0150566	0.00783694	426.6	0.0737243	0.0630386	0.1754	0.161226	0.0287619	0.0200829	0.00757918	0.0105543	0.558185	0.534687	0.331303	0.308467	343	0.011465	0.010426	0.127352	0.11836	0.055457	0.049406	0.198366	0.210614	528.61	0.044727	0.045574	0.072937
439.34	0.152088	0.149966	0.6974	0.68863	0.00352178	0.00405837	0.0309417	0.029704	0.00595416	0.0064571	0.0651309	0.0646025	0.364551	0.358691	923.2	0.0348802	0.0239195	0.242305	0.188872	0.0999746	0.0625559	0.0153936	0.00785199	426.8	0.0739944	0.0631456	0.175539	0.161456	0.0282305	0.020119	0.0072892	0.0105736	0.558084	0.534741	0.331421	0.308716	343.2	0.011583	0.010445	0.127549	0.118512	0.05595	0.049487	0.198487	0.21073	528.81	0.045379	0.045596	0.072509
439.54	0.151949	0.149966	0.697304	0.68863	0.00319298	0.00405837	0.0312985	0.029704	0.00629803	0.0064571	0.0650227	0.0646025	0.364571	0.358691	923.4	0.0352268	0.0239651	0.242973	0.189212	0.100151	0.0626736	0.0155244	0.00786703	427	0.0745427	0.0632524	0.175596	0.161686	0.0283017	0.020155	0.00706519	0.0105929	0.559028	0.534795	0.331758	0.308965	343.4	0.011563	0.010464	0.127554	0.118664	0.055929	0.049569	0.198804	0.210846	529.01	0.044905	0.045619	0.072831
439.74	0.152061	0.149966	0.697341	0.68863	0.00326935	0.00405837	0.0314505	0.029704	0.00654706	0.0064571	0.0648429	0.0646025	0.364422	0.358691	923.6	0.0349557	0.0240107	0.243415	0.189552	0.0997038	0.0627912	0.0157916	0.00788208	427.2	0.0743281	0.0633593	0.175207	0.161915	0.0282536	0.020191	0.00703742	0.0106121	0.559032	0.534847	0.331537	0.309212	343.6	0.011651	0.010482	0.127755	0.118816	0.05607	0.049651	0.199414	0.210961	529.21	0.044926	0.045641	0.073153
439.94	0.152016	0.149966	0.697572	0.68863	0.00301187	0.00405837	0.030894	0.029704	0.00615221	0.0064571	0.0634621	0.0646025	0.363451	0.358691	923.8	0.0349472	0.0240564	0.243772	0.189893	0.0997057	0.0629089	0.0159933	0.00789713	427.4	0.0741505	0.063466	0.175413	0.162145	0.0279436	0.020227	0.00652512	0.0106314	0.559246	0.5349	0.331936	0.309459	343.8	0.011337	0.010501	0.127173	0.118968	0.055988	0.049732	0.199083	0.211076	529.41	0.044379	0.045664	0.073014
440.14	0.152102	0.149966	0.697579	0.68863	0.00264548	0.00405837	0.0309618	0.029704	0.0060433	0.0064571	0.06345	0.0646025	0.363158	0.358691	924	0.0349855	0.024102	0.244218	0.190233	0.100002	0.0630265	0.0159943	0.00791218	427.6	0.0742085	0.0635727	0.175565	0.162373	0.0284192	0.0202629	0.00644336	0.0106507	0.559981	0.534952	0.332416	0.309705	344	0.011027	0.01052	0.12663	0.11912	0.055502	0.049813	0.198964	0.211191	529.61	0.04352	0.045686	0.072442
440.34	0.152299	0.149966	0.697815	0.68863	0.00278286	0.00405837	0.0312443	0.029704	0.00659104	0.0064571	0.0635729	0.0646025	0.363086	0.358691	924.2	0.0349871	0.0241476	0.24442	0.190573	0.100071	0.0631441	0.0154656	0.00792722	427.8	0.0744048	0.0636794	0.176383	0.162602	0.0284804	0.0202989	0.00675426	0.0106699	0.560474	0.535004	0.333286	0.30995	344.2	0.011164	0.010538	0.126301	0.119271	0.055154	0.049895	0.199059	0.211304	529.81	0.043452	0.045708	0.072799
440.54	0.151851	0.149966	0.69764	0.68863	0.00284803	0.00405837	0.0306125	0.029704	0.00644983	0.0064571	0.0634763	0.0646025	0.362564	0.358691	924.4	0.0354095	0.0241932	0.244802	0.190913	0.100482	0.0632617	0.0156079	0.00794227	428	0.075114	0.063786	0.177551	0.162831	0.0295925	0.0203349	0.00747802	0.0106892	0.561641	0.535055	0.333715	0.310194	344.4	0.011509	0.010557	0.12617	0.119422	0.055382	0.049976	0.199708	0.211418	530.01	0.043646	0.04573	0.073091
440.74	0.151662	0.149966	0.697462	0.68863	0.00257482	0.00405837	0.0300363	0.029704	0.00618218	0.0064571	0.063725	0.0646025	0.36186	0.358691	924.6	0.0352145	0.0242389	0.24506	0.191253	0.100404	0.0633793	0.0150508	0.00795731	428.2	0.0756623	0.0638925	0.178436	0.163059	0.0304141	0.0203708	0.00820287	0.0107084	0.5621	0.535105	0.334519	0.310438	344.6	0.011633	0.010575	0.126045	0.119573	0.055347	0.050057	0.200127	0.211531	530.21	0.043163	0.045752	0.072737
440.94	0.151684	0.149966	0.697174	0.68863	0.00234194	0.00405837	0.0297907	0.029704	0.00606577	0.0064571	0.0642928	0.0646025	0.361409	0.358691	924.8	0.0351749	0.0242845	0.245531	0.191593	0.100463	0.0634968	0.0153455	0.00797236	428.4	0.0757537	0.063999	0.178942	0.163287	0.0306298	0.0204067	0.00855748	0.0107277	0.562639	0.535156	0.334922	0.310681	344.8	0.012095	0.010594	0.125902	0.119723	0.055493	0.050139	0.200728	0.211644	530.41	0.042161	0.045774	0.072023
441.14	0.151661	0.149966	0.697063	0.68863	0.00233972	0.00405837	0.0297321	0.029704	0.00620688	0.0064571	0.0651821	0.0646025	0.361016	0.358691	925	0.0355494	0.0243301	0.245915	0.191932	0.100867	0.0636144	0.0153545	0.0079874	428.6	0.0759399	0.0641055	0.179192	0.163514	0.030629	0.0204427	0.00833712	0.0107469	0.562574	0.535205	0.334566	0.310923	345	0.01244	0.010613	0.126321	0.119874	0.055988	0.05022	0.201889	0.211756	530.61	0.041992	0.045796	0.072153
441.34	0.151431	0.149966	0.697231	0.68863	0.00227312	0.00405837	0.0297538	0.029704	0.00639676	0.0064571	0.0659121	0.0646025	0.360458	0.358691	925.2	0.0356569	0.0243757	0.246198	0.192272	0.101188	0.0637319	0.0154601	0.00800245	428.8	0.0755906	0.0642119	0.179221	0.163742	0.0306191	0.0204786	0.0081016	0.0107662	0.562302	0.535255	0.334351	0.311165	345.2	0.012562	0.010631	0.126216	0.120024	0.055804	0.050301	0.201892	0.211867	530.81	0.041749	0.045818	0.072122
441.54	0.150959	0.149966	0.697044	0.68863	0.00185219	0.00405837	0.0297758	0.029704	0.00626154	0.0064571	0.0656961	0.0646025	0.360037	0.358691	925.4	0.035733	0.0244213	0.246491	0.192611	0.101175	0.0638495	0.0156311	0.00801749	429	0.0757698	0.0643182	0.180091	0.163969	0.0307099	0.0205145	0.00889524	0.0107854	0.563152	0.535304	0.335149	0.311405	345.4	0.01246	0.01065	0.126491	0.120174	0.056086	0.050382	0.202425	0.211978	531.01	0.041815	0.045839	0.072215
441.74	0.150935	0.149966	0.696273	0.68863	0.00131407	0.00405837	0.0295887	0.029704	0.00628154	0.0064571	0.0655145	0.0646025	0.36021	0.358691	925.6	0.0356739	0.0244669	0.246881	0.192951	0.101602	0.063967	0.015897	0.00803253	429.2	0.0754222	0.0644244	0.179936	0.164196	0.0298885	0.0205504	0.00847434	0.0108046	0.56303	0.535352	0.334963	0.311645	345.6	0.012819	0.010668	0.127158	0.120324	0.056099	0.050463	0.202723	0.212089	531.21	0.041875	0.045861	0.071697
441.94	0.151201	0.149966	0.696683	0.68863	0.00205467	0.00405837	0.0302226	0.029704	0.00658655	0.0064571	0.065656	0.0646025	0.361006	0.358691	925.8	0.0360025	0.0245126	0.246768	0.19329	0.101312	0.0640845	0.0156857	0.00804757	429.4	0.0749721	0.0645307	0.179973	0.164422	0.0291921	0.0205862	0.00841807	0.0108238	0.563267	0.5354	0.334972	0.311885	345.8	0.013321	0.010687	0.127914	0.120473	0.055819	0.050544	0.203129	0.212199	531.41	0.042148	0.045882	0.071346
442.14	0.151596	0.149966	0.697222	0.68863	0.00238889	0.00405837	0.0308591	0.029704	0.00670523	0.0064571	0.066004	0.0646025	0.361367	0.358691	926	0.0369256	0.0245582	0.247194	0.193629	0.101667	0.064202	0.0161608	0.00806261	429.6	0.0746804	0.0646368	0.180377	0.164649	0.0289832	0.0206221	0.00831603	0.010843	0.563245	0.535448	0.335612	0.312123	346	0.013334	0.010706	0.128441	0.120622	0.05549	0.050625	0.203528	0.212309	531.61	0.042532	0.045903	0.071511
442.34	0.151948	0.149966	0.697008	0.68863	0.00255789	0.00405837	0.0310911	0.029704	0.00641269	0.0064571	0.0661447	0.0646025	0.361184	0.358691	926.2	0.0372236	0.0246038	0.247386	0.193968	0.101863	0.0643195	0.0157485	0.00807765	429.8	0.0746783	0.0647429	0.180645	0.164875	0.0292348	0.020658	0.00869264	0.0108623	0.564024	0.535495	0.336291	0.312361	346.2	0.013211	0.010724	0.129055	0.120771	0.055677	0.050706	0.203402	0.212418	531.81	0.043045	0.045925	0.071689
442.54	0.151765	0.149966	0.696636	0.68863	0.00263207	0.00405837	0.0312605	0.029704	0.00609543	0.0064571	0.0663611	0.0646025	0.360925	0.358691	926.4	0.0374897	0.0246494	0.248024	0.194307	0.102145	0.0644369	0.0157831	0.00809269	430	0.0744944	0.064849	0.180642	0.165101	0.0293663	0.0206938	0.0079304	0.0108815	0.564196	0.535542	0.33651	0.312598	346.4	0.013049	0.010743	0.129107	0.12092	0.055847	0.050787	0.203319	0.212527	532.01	0.043796	0.045946	0.072094
442.74	0.15158	0.149966	0.696756	0.68863	0.00274609	0.00405837	0.0310553	0.029704	0.00568156	0.0064571	0.0668227	0.0646025	0.361067	0.358691	926.6	0.0378892	0.0246949	0.248381	0.194646	0.10314	0.0645544	0.016	0.00810773	430.2	0.0745722	0.064955	0.180889	0.165326	0.0295561	0.0207296	0.00828867	0.0109007	0.564422	0.535589	0.336883	0.312835	346.6	0.012626	0.010761	0.129321	0.121069	0.055681	0.050868	0.203716	0.212636	532.21	0.044284	0.045967	0.071816
442.94	0.151754	0.149966	0.697169	0.68863	0.00300332	0.00405837	0.0307158	0.029704	0.00548366	0.0064571	0.0670513	0.0646025	0.361674	0.358691	926.8	0.0376432	0.0247405	0.248523	0.194985	0.103016	0.0646718	0.0162469	0.00812277	430.4	0.075294	0.065061	0.181261	0.165552	0.0298367	0.0207655	0.00814179	0.0109199	0.564926	0.535635	0.337195	0.313071	346.8	0.012472	0.01078	0.129429	0.121217	0.056141	0.050948	0.203601	0.212744	532.41	0.044552	0.045988	0.072174
443.14	0.15214	0.149966	0.69752	0.68863	0.0034577	0.00405837	0.0309218	0.029704	0.00559547	0.0064571	0.0667976	0.0646025	0.362479	0.358691	927	0.0377631	0.0247861	0.248659	0.195324	0.103615	0.0647892	0.0162741	0.0081378	430.6	0.0758449	0.0651668	0.181745	0.165777	0.0300858	0.0208013	0.00881823	0.0109391	0.565769	0.53568	0.337597	0.313306	347	0.011961	0.010798	0.12966	0.121365	0.056253	0.051029	0.203316	0.212851	532.61	0.044944	0.046009	0.072221
443.34	0.152225	0.149966	0.697546	0.68863	0.00381195	0.00405837	0.0311781	0.029704	0.00539959	0.0064571	0.0664039	0.0646025	0.362873	0.358691	927.2	0.0376549	0.0248317	0.248553	0.195663	0.10339	0.0649066	0.016031	0.00815284	430.8	0.075305	0.0652727	0.181068	0.166001	0.0298709	0.0208371	0.00807093	0.0109583	0.565818	0.535726	0.337756	0.31354	347.2	0.011839	0.010817	0.129901	0.121513	0.056528	0.05111	0.203347	0.212958	532.81	0.044782	0.046029	0.071687
443.54	0.152141	0.149966	0.697641	0.68863	0.00427239	0.00405837	0.0315124	0.029704	0.00536363	0.0064571	0.0664557	0.0646025	0.363077	0.358691	927.4	0.0381698	0.0248773	0.249168	0.196001	0.103594	0.065024	0.0163284	0.00816788	431	0.0757291	0.0653785	0.180723	0.166226	0.0302271	0.0208729	0.00810355	0.0109774	0.566481	0.535771	0.337869	0.313774	347.4	0.011635	0.010835	0.130068	0.121661	0.056772	0.05119	0.203401	0.213065	533.01	0.044155	0.04605	0.0719
443.74	0.152605	0.149966	0.698017	0.68863	0.00482784	0.00405837	0.0319463	0.029704	0.00557688	0.0064571	0.0666316	0.0646025	0.363697	0.358691	927.6	0.037993	0.0249229	0.249505	0.19634	0.10407	0.0651414	0.0165203	0.00818291	431.2	0.0752369	0.0654842	0.179963	0.16645	0.0299037	0.0209087	0.00784044	0.0109966	0.566403	0.535815	0.337094	0.314007	347.6	0.012039	0.010854	0.129976	0.121808	0.057271	0.051271	0.203157	0.213171	533.21	0.044169	0.046071	0.072014
443.94	0.153341	0.149966	0.698867	0.68863	0.00530818	0.00405837	0.0323794	0.029704	0.00551682	0.0064571	0.0670073	0.0646025	0.363769	0.358691	927.8	0.0378688	0.0249684	0.249946	0.196678	0.103708	0.0652588	0.015853	0.00819795	431.4	0.0758254	0.0655899	0.180619	0.166674	0.0300157	0.0209444	0.00786739	0.0110158	0.567315	0.535859	0.337462	0.314239	347.8	0.012303	0.010872	0.129195	0.121956	0.057356	0.051351	0.202949	0.213277	533.41	0.044109	0.046091	0.072174
444.14	0.153471	0.149966	0.698601	0.68863	0.00545095	0.00405837	0.0321992	0.029704	0.00545335	0.0064571	0.0671583	0.0646025	0.364037	0.358691	928	0.0373972	0.025014	0.250101	0.197016	0.103532	0.0653762	0.0153752	0.00821298	431.6	0.0766707	0.0656955	0.181012	0.166898	0.0311135	0.0209802	0.00815107	0.011035	0.567874	0.535903	0.337713	0.31447	348	0.012842	0.010891	0.129647	0.122103	0.057366	0.051432	0.20316	0.213382	533.61	0.044561	0.046111	0.072503
444.34	0.153195	0.149966	0.698529	0.68863	0.00580512	0.00405837	0.0321657	0.029704	0.00553283	0.0064571	0.0667161	0.0646025	0.364171	0.358691	928.2	0.0371739	0.0250596	0.249999	0.197355	0.103652	0.0654935	0.0147169	0.00822801	431.8	0.0770283	0.0658011	0.181637	0.167122	0.0312505	0.0210159	0.00823529	0.0110542	0.568082	0.535946	0.33807	0.314701	348.2	0.012809	0.010909	0.129842	0.122249	0.057473	0.051512	0.203066	0.213487	533.81	0.044725	0.046132	0.073093
444.54	0.153065	0.149966	0.698402	0.68863	0.00618501	0.00405837	0.0319595	0.029704	0.00524786	0.0064571	0.066332	0.0646025	0.363661	0.358691	928.4	0.0365257	0.0251052	0.25029	0.197693	0.103622	0.0656108	0.0147564	0.00824305	432	0.077094	0.0659066	0.181881	0.167345	0.031151	0.0210517	0.00812118	0.0110733	0.568392	0.535989	0.33778	0.314931	348.4	0.012652	0.010928	0.130079	0.122396	0.057389	0.051593	0.203357	0.213591	534.01	0.045087	0.046152	0.073945
444.74	0.153299	0.149966	0.698266	0.68863	0.00618956	0.00405837	0.032109	0.029704	0.00498327	0.0064571	0.0659757	0.0646025	0.363419	0.358691	928.6	0.0361125	0.0251507	0.250566	0.198031	0.103055	0.0657281	0.0144823	0.00825808	432.2	0.0773543	0.066012	0.182114	0.167568	0.031197	0.0210874	0.00776038	0.0110925	0.568312	0.536032	0.337456	0.315161	348.6	0.012639	0.010946	0.130205	0.122542	0.057527	0.051673	0.203458	0.213695	534.21	0.044348	0.046172	0.073546
444.94	0.153453	0.149966	0.698045	0.68863	0.00585434	0.00405837	0.0321176	0.029704	0.00500651	0.0064571	0.0658556	0.0646025	0.363371	0.358691	928.8	0.0358706	0.0251963	0.250911	0.198369	0.103049	0.0658454	0.0145052	0.00827311	432.4	0.0772431	0.0661174	0.182584	0.167791	0.0314268	0.0211231	0.007288	0.0111116	0.568112	0.536074	0.337262	0.315389	348.8	0.012736	0.010965	0.129996	0.122689	0.05693	0.051753	0.203168	0.213799	534.41	0.044473	0.046192	0.073766
445.14	0.153435	0.149966	0.698058	0.68863	0.00547858	0.00405837	0.0322031	0.029704	0.00519349	0.0064571	0.066055	0.0646025	0.363074	0.358691	929	0.0357203	0.0252418	0.251238	0.198706	0.103362	0.0659627	0.0148287	0.00828814	432.6	0.0771422	0.0662228	0.182235	0.168013	0.0314044	0.0211588	0.00668785	0.0111308	0.567866	0.536116	0.336774	0.315617	349	0.012787	0.010983	0.130003	0.122835	0.056686	0.051833	0.203144	0.213902	534.61	0.044781	0.046212	0.074181
445.34	0.153126	0.149966	0.698046	0.68863	0.00521254	0.00405837	0.0324447	0.029704	0.00541431	0.0064571	0.0660198	0.0646025	0.362612	0.358691	929.2	0.0354501	0.0252874	0.251314	0.199044	0.10287	0.06608	0.0143566	0.00830317	432.8	0.0773383	0.0663281	0.182404	0.168236	0.0315399	0.0211945	0.00683781	0.0111499	0.567883	0.536158	0.336855	0.315845	349.2	0.012944	0.011002	0.130141	0.12298	0.056512	0.051913	0.203547	0.214005	534.81	0.04478	0.046232	0.074163
445.54	0.153115	0.149966	0.697674	0.68863	0.00481284	0.00405837	0.0325108	0.029704	0.00573874	0.0064571	0.065592	0.0646025	0.362443	0.358691	929.4	0.0358125	0.025333	0.252438	0.199382	0.103224	0.0661973	0.014853	0.0083182	433	0.0773621	0.0664333	0.182685	0.168458	0.031081	0.0212302	0.00685129	0.0111691	0.568457	0.536199	0.337326	0.316071	349.4	0.013285	0.01102	0.130085	0.123126	0.056532	0.051994	0.203693	0.214107	535.01	0.04444	0.046252	0.074142
445.74	0.153719	0.149966	0.69782	0.68863	0.00478446	0.00405837	0.0327767	0.029704	0.00580875	0.0064571	0.0660659	0.0646025	0.36287	0.358691	929.6	0.0357184	0.0253785	0.252516	0.199719	0.103076	0.0663145	0.0143671	0.00833323	433.2	0.0769018	0.0665385	0.18264	0.168679	0.0308816	0.0212659	0.00685258	0.0111882	0.56814	0.53624	0.337862	0.316297	349.6	0.013486	0.011039	0.130742	0.123271	0.056252	0.052074	0.204004	0.214209	535.21	0.044099	0.046271	0.074042
445.94	0.153548	0.149966	0.698726	0.68863	0.00553918	0.00405837	0.0335194	0.029704	0.00650055	0.0064571	0.0665968	0.0646025	0.363123	0.358691	929.8	0.0362896	0.0254241	0.253421	0.200057	0.103179	0.0664317	0.0145054	0.00834826	433.4	0.0769998	0.0666437	0.182954	0.168901	0.0309654	0.0213015	0.00737171	0.0112073	0.569006	0.53628	0.338703	0.316523	349.8	0.013733	0.011057	0.131142	0.123416	0.056768	0.052154	0.204645	0.21431	535.41	0.044176	0.046291	0.074488
446.14	0.153694	0.149966	0.69907	0.68863	0.00564653	0.00405837	0.0341867	0.029704	0.00695639	0.0064571	0.0671681	0.0646025	0.363256	0.358691	930	0.0370672	0.0254696	0.254252	0.200394	0.103888	0.066549	0.014925	0.00836329	433.6	0.0772128	0.0667487	0.183008	0.169122	0.0312505	0.0213372	0.0073837	0.0112265	0.568933	0.53632	0.339692	0.316747	350	0.013735	0.011076	0.130902	0.123561	0.056792	0.052234	0.205317	0.214411	535.61	0.043805	0.04631	0.074579
446.34	0.153763	0.149966	0.699077	0.68863	0.00554338	0.00405837	0.0343165	0.029704	0.00701612	0.0064571	0.0673437	0.0646025	0.363317	0.358691	930.2	0.0367392	0.0255152	0.254447	0.200731	0.104011	0.0666662	0.0149705	0.00837831	433.8	0.077285	0.0668538	0.183027	0.169343	0.0313089	0.0213728	0.00750406	0.0112456	0.569015	0.53636	0.340429	0.316971	350.2	0.013498	0.011094	0.130807	0.123706	0.057215	0.052313	0.205219	0.214512	535.81	0.0439	0.04633	0.074698
446.54	0.153361	0.149966	0.699035	0.68863	0.0052285	0.00405837	0.0338415	0.029704	0.00690853	0.0064571	0.0675244	0.0646025	0.363277	0.358691	930.4	0.0369461	0.0255607	0.254775	0.201069	0.104289	0.0667834	0.015145	0.00839334	434	0.0776012	0.0669587	0.183338	0.169564	0.0314571	0.0214085	0.00780536	0.0112647	0.569582	0.536399	0.341324	0.317194	350.4	0.013775	0.011113	0.131237	0.12385	0.05759	0.052393	0.206034	0.214612	536.01	0.044331	0.046349	0.07462
446.74	0.153019	0.149966	0.699334	0.68863	0.00514298	0.00405837	0.0332963	0.029704	0.00696089	0.0064571	0.0676185	0.0646025	0.363574	0.358691	930.6	0.0372555	0.0256062	0.255067	0.201406	0.10468	0.0669006	0.0154637	0.00840837	434.2	0.0784215	0.0670637	0.184112	0.169784	0.0314656	0.0214441	0.00894613	0.0112838	0.570465	0.536438	0.342638	0.317417	350.6	0.013262	0.011131	0.131674	0.123994	0.057533	0.052473	0.206324	0.214712	536.21	0.044453	0.046368	0.074398
446.94	0.152854	0.149966	0.699659	0.68863	0.0053582	0.00405837	0.0333963	0.029704	0.0071858	0.0064571	0.0674846	0.0646025	0.364365	0.358691	930.8	0.0368403	0.0256518	0.255391	0.201743	0.104714	0.0670177	0.0155554	0.00842339	434.4	0.078735	0.0671685	0.18442	0.170005	0.0317956	0.0214797	0.00910963	0.011303	0.571377	0.536477	0.343513	0.317639	350.8	0.012894	0.011149	0.131931	0.124138	0.057584	0.052553	0.205787	0.214811	536.41	0.044573	0.046388	0.074509
447.14	0.152509	0.149966	0.69967	0.68863	0.00571915	0.00405837	0.0338598	0.029704	0.00748777	0.0064571	0.0672403	0.0646025	0.36485	0.358691	931	0.037045	0.0256973	0.255845	0.202079	0.105076	0.0671349	0.0155872	0.00843841	434.6	0.0786322	0.0672733	0.184939	0.170225	0.0321269	0.0215153	0.00953523	0.0113221	0.572806	0.536516	0.344495	0.31786	351	0.012424	0.011168	0.13198	0.124282	0.057419	0.052633	0.205709	0.21491	536.61	0.044472	0.046407	0.073591
447.34	0.151773	0.149966	0.699476	0.68863	0.00590661	0.00405837	0.0336517	0.029704	0.0069298	0.0064571	0.0675078	0.0646025	0.364853	0.358691	931.2	0.0367503	0.0257429	0.255903	0.202416	0.104915	0.067252	0.01523	0.00845344	434.8	0.0784191	0.0673781	0.184844	0.170444	0.0320592	0.0215509	0.00963239	0.0113411	0.573037	0.536554	0.344841	0.318081	351.2	0.012932	0.011186	0.132437	0.124426	0.058107	0.052712	0.206177	0.215008	536.81	0.043798	0.046426	0.0731
447.54	0.151891	0.149966	0.699737	0.68863	0.00632237	0.00405837	0.0341274	0.029704	0.00743478	0.0064571	0.0684628	0.0646025	0.365077	0.358691	931.4	0.0373267	0.0257884	0.256606	0.202753	0.105629	0.0673691	0.0160717	0.00846846	435	0.0790677	0.0674828	0.185297	0.170664	0.0318849	0.0215864	0.00958543	0.0113603	0.573471	0.536591	0.344947	0.318301	351.4	0.012923	0.011205	0.132374	0.124569	0.058279	0.052792	0.206347	0.215107	537.01	0.043907	0.046445	0.073258
447.74	0.152717	0.149966	0.700073	0.68863	0.00664545	0.00405837	0.0344798	0.029704	0.00836231	0.0064571	0.0688363	0.0646025	0.36588	0.358691	931.6	0.0370271	0.0258339	0.256741	0.20309	0.105581	0.0674862	0.0156057	0.00848348	435.2	0.0788661	0.0675875	0.185148	0.170883	0.0317827	0.021622	0.00952995	0.0113793	0.573666	0.536629	0.34489	0.31852	351.6	0.013121	0.011223	0.132416	0.124712	0.058986	0.052871	0.206206	0.215204	537.21	0.043755	0.046463	0.073555
447.94	0.153326	0.149966	0.700369	0.68863	0.00702984	0.00405837	0.0344122	0.029704	0.00871316	0.0064571	0.0689589	0.0646025	0.36625	0.358691	931.8	0.0370827	0.0258794	0.256994	0.203426	0.105318	0.0676034	0.015512	0.00849851	435.4	0.0801341	0.0676921	0.186029	0.171102	0.0324014	0.0216576	0.00951998	0.0113984	0.574639	0.536666	0.34515	0.318739	351.8	0.013153	0.011241	0.132709	0.124855	0.05907	0.052951	0.206728	0.215302	537.41	0.044436	0.046482	0.074085
448.14	0.153059	0.149966	0.699833	0.68863	0.00720679	0.00405837	0.0337798	0.029704	0.00834263	0.0064571	0.0683663	0.0646025	0.366285	0.358691	932	0.0368593	0.0259249	0.257292	0.203763	0.105702	0.0677204	0.0157509	0.00851353	435.6	0.0805571	0.0677966	0.186064	0.171321	0.0324604	0.0216931	0.00918294	0.0114175	0.574337	0.536703	0.345196	0.318957	352	0.012891	0.01126	0.133191	0.124998	0.059131	0.05303	0.20666	0.215398	537.61	0.04482	0.046501	0.074281
448.34	0.152986	0.149966	0.69966	0.68863	0.00714002	0.00405837	0.0336327	0.029704	0.00793102	0.0064571	0.0679123	0.0646025	0.366061	0.358691	932.2	0.0367683	0.0259705	0.257509	0.204099	0.105939	0.0678375	0.015951	0.00852855	435.8	0.0801662	0.0679011	0.186153	0.171539	0.0317987	0.0217286	0.00847178	0.0114366	0.574474	0.536739	0.344921	0.319174	352.2	0.01234	0.011278	0.133054	0.12514	0.058838	0.05311	0.206425	0.215495	537.81	0.044856	0.046519	0.074433
448.54	0.153019	0.149966	0.699487	0.68863	0.00700821	0.00405837	0.0336137	0.029704	0.00760057	0.0064571	0.0675363	0.0646025	0.366012	0.358691	932.4	0.0369129	0.026016	0.258203	0.204435	0.105924	0.0679546	0.016272	0.00854357	436	0.0796249	0.0680055	0.185728	0.171758	0.0309972	0.0217641	0.00770831	0.0114557	0.57442	0.536775	0.344441	0.31939	352.4	0.012296	0.011297	0.133099	0.125282	0.058664	0.053189	0.206362	0.215591	538.01	0.044997	0.046538	0.074959
448.74	0.153087	0.149966	0.699161	0.68863	0.0067484	0.00405837	0.0332098	0.029704	0.00720649	0.0064571	0.067088	0.0646025	0.365819	0.358691	932.6	0.0369694	0.0260615	0.25845	0.204771	0.105842	0.0680716	0.0162757	0.00855859	436.2	0.0797952	0.0681099	0.185879	0.171976	0.0308091	0.0217997	0.00776987	0.0114747	0.574832	0.536811	0.344074	0.319606	352.6	0.0124	0.011315	0.133341	0.125424	0.05864	0.053269	0.205947	0.215687	538.21	0.044747	0.046556	0.074177
448.94	0.153234	0.149966	0.699153	0.68863	0.00641732	0.00405837	0.0329699	0.029704	0.00691073	0.0064571	0.0668944	0.0646025	0.365464	0.358691	932.8	0.0370252	0.026107	0.258599	0.205107	0.106107	0.0681886	0.0164122	0.00857361	436.4	0.0796422	0.0682143	0.185728	0.172193	0.0305536	0.0218352	0.00708916	0.0114938	0.574285	0.536847	0.343722	0.319822	352.8	0.012364	0.011333	0.133396	0.125566	0.058762	0.053348	0.205677	0.215782	538.41	0.04502	0.046574	0.074073
449.14	0.153503	0.149966	0.699423	0.68863	0.0066387	0.00405837	0.0332259	0.029704	0.00698146	0.0064571	0.0668868	0.0646025	0.36537	0.358691	933	0.037173	0.0261525	0.259105	0.205443	0.106463	0.0683057	0.0169804	0.00858862	436.6	0.0795692	0.0683185	0.185179	0.172411	0.0300949	0.0218706	0.00731308	0.0115129	0.574253	0.536882	0.34269	0.320036	353	0.013211	0.011352	0.133756	0.125708	0.059181	0.053427	0.206024	0.215877	538.61	0.044355	0.046593	0.073849
449.34	0.153488	0.149966	0.699369	0.68863	0.00670257	0.00405837	0.033051	0.029704	0.00690785	0.0064571	0.0667456	0.0646025	0.365145	0.358691	933.2	0.0374619	0.026198	0.25955	0.205779	0.106382	0.0684227	0.016825	0.00860364	436.8	0.0798854	0.0684228	0.185147	0.172628	0.0299997	0.0219061	0.00724237	0.0115319	0.574019	0.536917	0.342548	0.32025	353.2	0.013574	0.01137	0.134141	0.125849	0.059687	0.053506	0.20668	0.215971	538.81	0.04472	0.046611	0.073878
449.54	0.153653	0.149966	0.69963	0.68863	0.00654561	0.00405837	0.032562	0.029704	0.00712901	0.0064571	0.0671535	0.0646025	0.364998	0.358691	933.4	0.0376276	0.0262435	0.260151	0.206115	0.107086	0.0685397	0.0172396	0.00861866	437	0.0796657	0.0685269	0.185298	0.172845	0.029818	0.0219416	0.00763507	0.011551	0.574076	0.536951	0.3425	0.320464	353.4	0.013879	0.011388	0.133772	0.125991	0.059862	0.053585	0.206787	0.216066	539.01	0.044884	0.046629	0.073704
449.74	0.153473	0.149966	0.700244	0.68863	0.00654953	0.00405837	0.032432	0.029704	0.00702746	0.0064571	0.0675118	0.0646025	0.36507	0.358691	933.6	0.0374697	0.026289	0.260288	0.206451	0.107192	0.0686566	0.0170051	0.00863367	437.2	0.0794198	0.068631	0.185275	0.173062	0.0295669	0.0219771	0.0079481	0.01157	0.574191	0.536986	0.34246	0.320677	353.6	0.013928	0.011407	0.133864	0.126132	0.059883	0.053665	0.20699	0.216159	539.21	0.0448	0.046647	0.07348
449.94	0.152866	0.149966	0.700407	0.68863	0.00640939	0.00405837	0.032153	0.029704	0.00718989	0.0064571	0.0675567	0.0646025	0.364761	0.358691	933.8	0.0381566	0.0263345	0.260859	0.206786	0.107866	0.0687736	0.0175758	0.00864869	437.4	0.0794277	0.0687351	0.185406	0.173278	0.029165	0.0220125	0.00775797	0.0115891	0.574143	0.53702	0.342953	0.320889	353.8	0.014054	0.011425	0.133068	0.126272	0.059998	0.053744	0.206852	0.216253	539.41	0.044808	0.046665	0.073311
450.14	0.152635	0.149966	0.700337	0.68863	0.00567858	0.00405837	0.0319227	0.029704	0.00713555	0.0064571	0.067669	0.0646025	0.364562	0.358691	934	0.0382179	0.02638	0.260239	0.207122	0.107913	0.0688906	0.0174904	0.0086637	437.6	0.0788962	0.0688391	0.185404	0.173495	0.0292431	0.0220479	0.00768263	0.0116081	0.573571	0.537054	0.343237	0.3211	354	0.01447	0.011443	0.132404	0.126413	0.059713	0.053823	0.206904	0.216346	539.61	0.044475	0.046683	0.072739
450.34	0.152327	0.149966	0.700112	0.68863	0.00464412	0.00405837	0.0313518	0.029704	0.00713936	0.0064571	0.0673582	0.0646025	0.364383	0.358691	934.2	0.0382555	0.0264255	0.260085	0.207457	0.107982	0.0690075	0.0177862	0.00867872	437.8	0.0786646	0.0689431	0.185506	0.173711	0.0295645	0.0220834	0.00793004	0.0116271	0.573491	0.537087	0.343617	0.321311	354.2	0.014199	0.011462	0.132407	0.126553	0.05983	0.053902	0.206721	0.216438	539.81	0.044519	0.0467	0.072359
450.54	0.152023	0.149966	0.700299	0.68863	0.00417011	0.00405837	0.0308898	0.029704	0.00748868	0.0064571	0.0668959	0.0646025	0.364569	0.358691	934.4	0.0382689	0.026471	0.260316	0.207792	0.107768	0.0691244	0.017263	0.00869373	438	0.0784911	0.069047	0.185684	0.173926	0.0297582	0.0221188	0.00852189	0.0116462	0.574452	0.53712	0.344157	0.321521	354.4	0.014391	0.01148	0.132731	0.126693	0.059345	0.05398	0.206567	0.21653	540.01	0.045072	0.046718	0.072314
450.74	0.151715	0.149966	0.700837	0.68863	0.00425797	0.00405837	0.0309529	0.029704	0.00787785	0.0064571	0.0664403	0.0646025	0.365087	0.358691	934.6	0.0385376	0.0265165	0.260957	0.208128	0.108236	0.0692413	0.0173966	0.00870874	438.2	0.0782432	0.0691508	0.18581	0.174142	0.0296784	0.0221542	0.00836159	0.0116652	0.574801	0.537153	0.344514	0.321731	354.6	0.014178	0.011498	0.132342	0.126833	0.059256	0.054059	0.206539	0.216622	540.21	0.04488	0.046736	0.072412
450.94	0.151352	0.149966	0.701145	0.68863	0.00401747	0.00405837	0.0308903	0.029704	0.007748	0.0064571	0.0658852	0.0646025	0.364923	0.358691	934.8	0.0380406	0.0265619	0.261753	0.208463	0.108386	0.0693582	0.017328	0.00872376	438.4	0.0778134	0.0692546	0.185842	0.174357	0.0301596	0.0221896	0.00848042	0.0116842	0.57542	0.537186	0.345202	0.32194	354.8	0.013838	0.011517	0.132342	0.126973	0.058771	0.054138	0.206375	0.216713	540.41	0.045345	0.046753	0.073038
451.14	0.151133	0.149966	0.701617	0.68863	0.00403794	0.00405837	0.0306655	0.029704	0.0080037	0.0064571	0.0659638	0.0646025	0.3644	0.358691	935	0.0378976	0.0266074	0.261749	0.208798	0.108222	0.0694751	0.0167792	0.00873877	438.6	0.0777486	0.0693584	0.18626	0.174572	0.0303697	0.022225	0.00813604	0.0117032	0.576056	0.537218	0.345816	0.322148	355	0.013855	0.011535	0.13204	0.127113	0.058603	0.054217	0.206684	0.216804	540.61	0.045461	0.046771	0.073381
451.34	0.150926	0.149966	0.701839	0.68863	0.00438853	0.00405837	0.0305119	0.029704	0.00776882	0.0064571	0.0661906	0.0646025	0.364113	0.358691	935.2	0.0372682	0.0266529	0.261427	0.209133	0.107568	0.069592	0.0162529	0.00875378	438.8	0.0783562	0.0694621	0.186713	0.174787	0.0309843	0.0222603	0.00811287	0.0117223	0.576109	0.53725	0.346755	0.322355	355.2	0.013758	0.011553	0.132433	0.127252	0.058681	0.054295	0.20654	0.216895	540.81	0.045932	0.046788	0.074225
451.54	0.151342	0.149966	0.701798	0.68863	0.00454739	0.00405837	0.0307641	0.029704	0.00809986	0.0064571	0.0666794	0.0646025	0.364348	0.358691	935.4	0.0374333	0.0266984	0.261873	0.209467	0.107621	0.0697088	0.0165224	0.00876879	439	0.0785417	0.0695657	0.186719	0.175002	0.0311575	0.0222957	0.0075865	0.0117413	0.575922	0.537282	0.347348	0.322563	355.4	0.013102	0.011572	0.132208	0.127391	0.058042	0.054374	0.206512	0.216985	541.01	0.046256	0.046805	0.074715
451.74	0.151545	0.149966	0.70178	0.68863	0.00484334	0.00405837	0.0302633	0.029704	0.00821615	0.0064571	0.0664553	0.0646025	0.364696	0.358691	935.6	0.0367296	0.0267438	0.261844	0.209802	0.107213	0.0698257	0.0159241	0.0087838	439.2	0.0791115	0.0696693	0.187257	0.175216	0.0320552	0.022331	0.00807776	0.0117603	0.576655	0.537313	0.348083	0.322769	355.6	0.012619	0.01159	0.132978	0.12753	0.058657	0.054453	0.20681	0.217075	541.21	0.046202	0.046823	0.075144
451.94	0.151146	0.149966	0.701419	0.68863	0.00496839	0.00405837	0.0295903	0.029704	0.00785392	0.0064571	0.0660297	0.0646025	0.364387	0.358691	935.8	0.0368394	0.0267893	0.262472	0.210137	0.107572	0.0699425	0.0162241	0.00879881	439.4	0.0796545	0.0697728	0.187726	0.17543	0.0321774	0.0223664	0.00815778	0.0117793	0.577314	0.537344	0.348264	0.322975	355.8	0.012076	0.011608	0.133047	0.127669	0.058637	0.054531	0.207129	0.217165	541.41	0.04677	0.04684	0.075542
452.14	0.150645	0.149966	0.700555	0.68863	0.00450745	0.00405837	0.0289388	0.029704	0.00710439	0.0064571	0.0653871	0.0646025	0.363699	0.358691	936	0.0366876	0.0268348	0.263155	0.210471	0.108094	0.0700593	0.0161929	0.00881382	439.6	0.0796043	0.0698763	0.187716	0.175644	0.0326824	0.0224017	0.00845989	0.0117983	0.577603	0.537375	0.349255	0.32318	356	0.012162	0.011627	0.133518	0.127807	0.058914	0.05461	0.207631	0.217254	541.61	0.046067	0.046857	0.074875
452.34	0.150806	0.149966	0.700278	0.68863	0.00437259	0.00405837	0.0288202	0.029704	0.00668262	0.0064571	0.0651422	0.0646025	0.363604	0.358691	936.2	0.0366377	0.0268802	0.263304	0.210806	0.108186	0.0701761	0.0160503	0.00882882	439.8	0.0797579	0.0699797	0.187734	0.175857	0.0324849	0.022437	0.00869484	0.0118172	0.578053	0.537406	0.3493	0.323384	356.2	0.012395	0.011645	0.13456	0.127946	0.05918	0.054688	0.208314	0.217343	541.81	0.04557	0.046874	0.075051
452.54	0.150955	0.149966	0.699947	0.68863	0.00443542	0.00405837	0.0289621	0.029704	0.00636802	0.0064571	0.0650911	0.0646025	0.363607	0.358691	936.4	0.0366514	0.0269257	0.263885	0.21114	0.108296	0.0702929	0.0161078	0.00884383	440	0.0799878	0.0700831	0.187725	0.176071	0.0319991	0.0224723	0.00838557	0.0118362	0.578266	0.537436	0.349414	0.323588	356.4	0.012237	0.011663	0.134886	0.128084	0.060035	0.054767	0.208507	0.217431	542.01	0.045649	0.046891	0.074876
452.74	0.151371	0.149966	0.699459	0.68863	0.00429116	0.00405837	0.0292404	0.029704	0.00590028	0.0064571	0.0650909	0.0646025	0.363604	0.358691	936.6	0.0364271	0.0269711	0.264413	0.211475	0.108521	0.0704097	0.0160664	0.00885884	440.2	0.0806897	0.0701864	0.187845	0.176284	0.0327228	0.0225076	0.00901239	0.0118552	0.578875	0.537466	0.349905	0.323792	356.6	0.012167	0.011681	0.135294	0.128221	0.060604	0.054845	0.208913	0.217519	542.21	0.045334	0.046907	0.074014
452.94	0.151702	0.149966	0.699429	0.68863	0.00428406	0.00405837	0.0297796	0.029704	0.00548481	0.0064571	0.0654662	0.0646025	0.363627	0.358691	936.8	0.0365407	0.0270166	0.264874	0.211809	0.10879	0.0705265	0.0160063	0.00887384	440.4	0.0809655	0.0702897	0.18802	0.176497	0.0325672	0.0225429	0.00859949	0.0118742	0.578805	0.537496	0.349675	0.323994	356.8	0.012723	0.0117	0.135639	0.128359	0.061165	0.054923	0.209333	0.217607	542.41	0.044816	0.046924	0.07384
453.14	0.151741	0.149966	0.699272	0.68863	0.00461924	0.00405837	0.0301462	0.029704	0.00534888	0.0064571	0.0656232	0.0646025	0.363914	0.358691	937	0.0371293	0.0270621	0.265995	0.212143	0.109335	0.0706432	0.0162079	0.00888885	440.6	0.0813342	0.0703929	0.188171	0.176709	0.0332515	0.0225782	0.00937419	0.0118932	0.579558	0.537526	0.350254	0.324196	357	0.013131	0.011718	0.136012	0.128497	0.061396	0.055002	0.209517	0.217694	542.61	0.044894	0.046941	0.073822
453.34	0.151371	0.149966	0.699158	0.68863	0.00461845	0.00405837	0.0301223	0.029704	0.00512493	0.0064571	0.0656329	0.0646025	0.363738	0.358691	937.2	0.0376029	0.0271075	0.266385	0.212477	0.109598	0.07076	0.0161197	0.00890385	440.8	0.0814346	0.0704961	0.188395	0.176922	0.0332312	0.0226134	0.00915269	0.0119121	0.579247	0.537555	0.350669	0.324398	357.2	0.01316	0.011736	0.135858	0.128634	0.062061	0.05508	0.209914	0.217781	542.81	0.045441	0.046957	0.073817
453.54	0.151192	0.149966	0.699534	0.68863	0.00472648	0.00405837	0.0301258	0.029704	0.00534644	0.0064571	0.0660159	0.0646025	0.363755	0.358691	937.4	0.0377952	0.0271529	0.266285	0.212811	0.110041	0.0708767	0.01618	0.00891886	441	0.0819012	0.0705992	0.189259	0.177134	0.0336114	0.0226487	0.00989868	0.0119311	0.579879	0.537584	0.350989	0.324599	357.4	0.013191	0.011754	0.135713	0.128771	0.061969	0.055158	0.210118	0.217868	543.01	0.045241	0.046974	0.073743
453.74	0.151377	0.149966	0.699546	0.68863	0.00474373	0.00405837	0.0302565	0.029704	0.00545244	0.0064571	0.0661374	0.0646025	0.364205	0.358691	937.6	0.0380478	0.0271984	0.266435	0.213145	0.109837	0.0709934	0.0162044	0.00893386	441.2	0.0815406	0.0707022	0.189223	0.177346	0.0336205	0.0226839	0.0093837	0.0119501	0.580251	0.537613	0.35105	0.324799	357.6	0.012971	0.011773	0.135132	0.128908	0.061934	0.055236	0.2098	0.217954	543.21	0.044654	0.04699	0.07334
453.94	0.151878	0.149966	0.699192	0.68863	0.00449534	0.00405837	0.0303965	0.029704	0.00577335	0.0064571	0.0665765	0.0646025	0.364664	0.358691	937.8	0.0388472	0.0272438	0.266906	0.213478	0.110427	0.0711101	0.0167816	0.00894886	441.4	0.0817219	0.0708052	0.189671	0.177557	0.0337425	0.0227192	0.00937046	0.011969	0.579934	0.537642	0.351814	0.324999	357.8	0.013166	0.011791	0.134702	0.129044	0.062067	0.055314	0.209874	0.21804	543.41	0.044875	0.047007	0.073042
454.14	0.15205	0.149966	0.699179	0.68863	0.00420306	0.00405837	0.0304742	0.029704	0.00631292	0.0064571	0.0669487	0.0646025	0.365144	0.358691	938	0.0386823	0.0272893	0.267522	0.213812	0.110634	0.0712268	0.0171653	0.00896386	441.6	0.0811521	0.0709082	0.189274	0.177769	0.0333717	0.0227544	0.0091511	0.011988	0.579835	0.53767	0.351324	0.325198	358	0.013562	0.011809	0.134968	0.129181	0.062064	0.055392	0.210007	0.218126	543.61	0.044709	0.047023	0.072999
454.34	0.153026	0.149966	0.699623	0.68863	0.00451753	0.00405837	0.0309624	0.029704	0.00697865	0.0064571	0.0675677	0.0646025	0.36592	0.358691	938.2	0.0395254	0.0273347	0.268108	0.214145	0.110747	0.0713434	0.0172683	0.00897886	441.8	0.0808173	0.0710111	0.188866	0.17798	0.0329901	0.0227896	0.00881707	0.0120069	0.5797	0.537698	0.35062	0.325396	358.2	0.013357	0.011827	0.135508	0.129317	0.061726	0.05547	0.209971	0.218211	543.81	0.044887	0.047039	0.073162
454.54	0.153051	0.149966	0.699666	0.68863	0.00466773	0.00405837	0.0312572	0.029704	0.00728914	0.0064571	0.0679321	0.0646025	0.366289	0.358691	938.4	0.0399599	0.0273801	0.268866	0.214479	0.111556	0.0714601	0.017284	0.00899386	442	0.0807942	0.0711139	0.188667	0.178191	0.0327863	0.0228248	0.00880347	0.0120258	0.580314	0.537726	0.350518	0.325594	358.4	0.013572	0.011845	0.135593	0.129453	0.061575	0.055548	0.210203	0.218296	544.01	0.044963	0.047056	0.073728
454.74	0.152916	0.149966	0.699798	0.68863	0.00474515	0.00405837	0.0314313	0.029704	0.00744489	0.0064571	0.0682644	0.0646025	0.366303	0.358691	938.6	0.0405624	0.0274256	0.269971	0.214812	0.112194	0.0715767	0.0174581	0.00900886	442.2	0.0807103	0.0712167	0.188283	0.178401	0.032345	0.02286	0.00787732	0.0120448	0.580378	0.537754	0.350256	0.325791	358.6	0.013792	0.011864	0.135443	0.129589	0.061684	0.055626	0.210597	0.21838	544.21	0.045108	0.047072	0.074267
454.94	0.15285	0.149966	0.699835	0.68863	0.0044836	0.00405837	0.031204	0.029704	0.00741818	0.0064571	0.0686024	0.0646025	0.365976	0.358691	938.8	0.0405126	0.027471	0.270877	0.215146	0.112599	0.0716934	0.0175456	0.00902386	442.4	0.0805346	0.0713194	0.188767	0.178612	0.0321036	0.0228952	0.00778052	0.0120637	0.580664	0.537781	0.350477	0.325988	358.8	0.013595	0.011882	0.136014	0.129725	0.061166	0.055704	0.210936	0.218464	544.41	0.045509	0.047088	0.074956
455.14	0.153059	0.149966	0.699966	0.68863	0.00476006	0.00405837	0.0311254	0.029704	0.0078719	0.0064571	0.0691306	0.0646025	0.366225	0.358691	939	0.0403038	0.0275164	0.270842	0.215479	0.112631	0.07181	0.0174881	0.00903886	442.6	0.0804545	0.0714221	0.189261	0.178822	0.0316219	0.0229303	0.00721234	0.0120827	0.580634	0.537808	0.350277	0.326184	359	0.013696	0.0119	0.136419	0.12986	0.061008	0.055782	0.211033	0.218548	544.61	0.045934	0.047104	0.076141
455.34	0.153171	0.149966	0.699668	0.68863	0.00514841	0.00405837	0.031082	0.029704	0.00801504	0.0064571	0.0690963	0.0646025	0.366592	0.358691	939.2	0.0394733	0.0275618	0.270816	0.215812	0.112066	0.0719266	0.0173117	0.00905386	442.8	0.0807119	0.0715247	0.189789	0.179032	0.0316595	0.0229655	0.00735868	0.0121016	0.580736	0.537835	0.350481	0.32638	359.2	0.013204	0.011918	0.13695	0.129995	0.060546	0.05586	0.211308	0.218631	544.81	0.046268	0.04712	0.076451
455.54	0.153271	0.149966	0.699272	0.68863	0.00509807	0.00405837	0.030611	0.029704	0.00823141	0.0064571	0.0690152	0.0646025	0.366779	0.358691	939.4	0.0398484	0.0276073	0.271528	0.216145	0.112436	0.0720432	0.0182629	0.00906886	443	0.0804819	0.0716273	0.190085	0.179242	0.0311988	0.0230006	0.00769977	0.0121205	0.580924	0.537862	0.350522	0.326574	359.4	0.013137	0.011936	0.137288	0.13013	0.060587	0.055937	0.212112	0.218714	545.01	0.046559	0.047135	0.076782
455.74	0.153344	0.149966	0.699077	0.68863	0.00512595	0.00405837	0.0297873	0.029704	0.00855361	0.0064571	0.0683407	0.0646025	0.366556	0.358691	939.6	0.0399946	0.0276527	0.272097	0.216478	0.112626	0.0721597	0.0187548	0.00908385	443.2	0.0807821	0.0717299	0.190754	0.179451	0.0311542	0.0230358	0.00838403	0.0121394	0.581818	0.537888	0.350717	0.326769	359.6	0.013329	0.011955	0.137834	0.130265	0.061124	0.056015	0.212328	0.218797	545.21	0.047088	0.047151	0.076968
455.94	0.153676	0.149966	0.698809	0.68863	0.00494221	0.00405837	0.0292124	0.029704	0.00873264	0.0064571	0.0676187	0.0646025	0.366359	0.358691	939.8	0.0403905	0.0276981	0.272629	0.21681	0.11285	0.0722763	0.0192147	0.00909885	443.4	0.0808586	0.0718323	0.190783	0.179661	0.0307882	0.0230709	0.00893179	0.0121583	0.582282	0.537915	0.351013	0.326963	359.8	0.013673	0.011973	0.137943	0.1304	0.061517	0.056092	0.212857	0.218879	545.41	0.0472	0.047167	0.076922
456.14	0.154353	0.149966	0.69879	0.68863	0.00483118	0.00405837	0.0290396	0.029704	0.00885507	0.0064571	0.0672171	0.0646025	0.366551	0.358691	940	0.0406992	0.0277435	0.27312	0.217143	0.113357	0.0723929	0.0195412	0.00911385	443.6	0.0812672	0.0719348	0.190997	0.17987	0.0309541	0.023106	0.00980661	0.0121772	0.583068	0.537941	0.351912	0.327156	360	0.014629	0.011991	0.139032	0.130534	0.062396	0.05617	0.21428	0.218962	545.61	0.047035	0.047182	0.076786
456.34	0.155049	0.149966	0.699152	0.68863	0.0050177	0.00405837	0.029088	0.029704	0.00902111	0.0064571	0.0670821	0.0646025	0.367046	0.358691	940.2	0.0403622	0.0277889	0.273353	0.217476	0.113092	0.0725094	0.0196062	0.00912884	443.8	0.081716	0.0720371	0.191188	0.180078	0.0304647	0.0231411	0.0102489	0.0121961	0.583687	0.537967	0.352037	0.327348	360.2	0.014884	0.012009	0.139521	0.130668	0.062741	0.056248	0.214591	0.219043	545.81	0.046661	0.047198	0.076438
456.54	0.155202	0.149966	0.699153	0.68863	0.00496829	0.00405837	0.0291778	0.029704	0.0090189	0.0064571	0.0668475	0.0646025	0.367289	0.358691	940.4	0.0404068	0.0278343	0.273823	0.217808	0.112773	0.0726259	0.0197835	0.00914383	444	0.0821292	0.0721394	0.191531	0.180287	0.0304338	0.0231762	0.0105292	0.012215	0.584502	0.537992	0.352731	0.32754	360.4	0.014597	0.012027	0.138837	0.130802	0.063087	0.056325	0.214671	0.219125	546.01	0.047102	0.047213	0.075769
456.74	0.155202	0.149966	0.699153	0.68863	0.00496829	0.00405837	0.0291778	0.029704	0.0090189	0.0064571	0.0668475	0.0646025	0.367289	0.358691	940.6	0.0405159	0.0278797	0.273944	0.218141	0.112688	0.0727424	0.0195755	0.00915883	444.2	0.0823709	0.0722417	0.191487	0.180495	0.0308952	0.0232113	0.0115034	0.0122339	0.585228	0.538017	0.353427	0.327732	360.6	0.015147	0.012045	0.139293	0.130936	0.06298	0.056402	0.215284	0.219206	546.21	0.046899	0.047229	0.075367
456.94	0.151766	0.144782	0.683111	0.664825	0.00478869	0.00391808	0.0286295	0.0286772	0.0088113	0.00623389	0.0653923	0.0623693	0.358906	0.346292	940.8	0.0405778	0.0279251	0.274148	0.218473	0.112455	0.0728589	0.0190051	0.00917382	444.4	0.0825527	0.0723439	0.191779	0.180703	0.0306758	0.0232463	0.0119552	0.0122528	0.585985	0.538043	0.353911	0.327922	360.8	0.015706	0.012063	0.139005	0.13107	0.063398	0.05648	0.215311	0.219286	546.41	0.047147	0.047244	0.075527
457.14	0.147742	0.139777	0.664173	0.641843	0.00461523	0.00378264	0.027962	0.0276859	0.0082666	0.00601839	0.0634445	0.0602133	0.348868	0.334322	941	0.0410115	0.0279705	0.274833	0.218805	0.112568	0.0729754	0.0189764	0.00918881	444.6	0.0825527	0.0724461	0.191779	0.180911	0.0306758	0.0232814	0.0119552	0.0122717	0.585985	0.538067	0.353911	0.328113	361	0.015369	0.012082	0.139061	0.131203	0.063863	0.056557	0.2152	0.219367	546.61	0.047987	0.047259	0.076036
457.34	0.143104	0.134945	0.642895	0.619656	0.00450093	0.00365188	0.0273876	0.0267288	0.00782148	0.00581035	0.0612886	0.0581318	0.337482	0.322765	941.2	0.040505	0.0280159	0.274532	0.219138	0.112352	0.0730919	0.0188021	0.0092038	444.8	0.0824368	0.0724317	0.191682	0.180875	0.0307204	0.0232768	0.0120175	0.0122693	0.585417	0.53796	0.353926	0.328047	361.2	0.01575	0.0121	0.139334	0.131336	0.064359	0.056634	0.215405	0.219447	546.81	0.047729	0.047274	0.075962
457.54	0.137857	0.13028	0.619814	0.598236	0.004394	0.00352565	0.026733	0.0258049	0.0075132	0.0056095	0.0590144	0.0561223	0.324902	0.311607	941.4	0.040659	0.0280613	0.274326	0.21947	0.112068	0.0732083	0.019068	0.0092188	445	0.082477	0.0724172	0.191672	0.180839	0.0307359	0.0232721	0.0119954	0.0122668	0.58526	0.537853	0.353598	0.327982	361.4	0.01576	0.012118	0.139244	0.131469	0.064005	0.056712	0.215435	0.219526	547.01	0.048016	0.04729	0.076399
457.74	0.132105	0.125777	0.59514	0.577556	0.00429936	0.00340377	0.0257886	0.0249128	0.00702213	0.00541559	0.0565111	0.0541823	0.311301	0.300836	941.6	0.0412333	0.0281067	0.275072	0.219802	0.112338	0.0733248	0.0196031	0.00923379	445.2	0.0826228	0.0724028	0.191766	0.180803	0.0311284	0.0232675	0.0122783	0.0122644	0.585156	0.537746	0.353081	0.327917	361.6	0.015399	0.012136	0.13868	0.131602	0.063615	0.056789	0.215186	0.219606	547.21	0.048167	0.047305	0.076098
457.94	0.126302	0.121429	0.569265	0.557591	0.00438193	0.00328611	0.0248852	0.0240517	0.00656342	0.00522838	0.0538116	0.0523093	0.297547	0.290436	941.8	0.0416433	0.0281521	0.275765	0.220133	0.113051	0.0734412	0.0195328	0.00924878	445.4	0.0822822	0.0723884	0.19139	0.180767	0.0309815	0.0232629	0.0123223	0.0122619	0.584745	0.537639	0.35229	0.327851	361.8	0.015337	0.012154	0.138559	0.131735	0.063544	0.056866	0.215494	0.219685	547.41	0.048396	0.04732	0.075812
458.14	0.120806	0.117231	0.542884	0.538316	0.00459987	0.00317251	0.0243064	0.0232202	0.00601973	0.00504765	0.0516991	0.0505011	0.28361	0.280397	942	0.0415141	0.0281974	0.275614	0.220465	0.113045	0.0735576	0.0193117	0.00926376	445.6	0.0821082	0.072374	0.191164	0.180731	0.0306371	0.0232582	0.0124883	0.0122595	0.584405	0.537532	0.351758	0.327786	362	0.015103	0.012172	0.138855	0.131867	0.063338	0.056943	0.215146	0.219763	547.61	0.048282	0.047335	0.076104
458.34	0.114967	0.113179	0.517417	0.519708	0.00489109	0.00306285	0.0236161	0.0224176	0.00572921	0.00487316	0.0493419	0.0487554	0.270059	0.270704	942.2	0.0418143	0.0282428	0.275811	0.220797	0.113363	0.073674	0.019111	0.00927875	445.8	0.0823688	0.0723596	0.190933	0.180695	0.0308232	0.0232536	0.013067	0.012257	0.584089	0.537425	0.351466	0.327721	362.2	0.015053	0.01219	0.13899	0.131999	0.063233	0.05702	0.215098	0.219842	547.81	0.047927	0.047349	0.076197
458.54	0.109952	0.109266	0.492826	0.501742	0.00505485	0.00295697	0.0228113	0.0216426	0.00533967	0.0047047	0.0467201	0.04707	0.257177	0.261346	942.4	0.0419566	0.0282882	0.276581	0.221129	0.113998	0.0737904	0.0190334	0.00929374	446	0.0826301	0.0723452	0.190733	0.180659	0.0307561	0.023249	0.0131461	0.0122546	0.583456	0.537318	0.350777	0.327655	362.4	0.015069	0.012208	0.138555	0.132131	0.063424	0.057097	0.21521	0.21992	548.01	0.047399	0.047364	0.076693
458.74	0.105544	0.105489	0.470307	0.484398	0.00555453	0.00285475	0.0223321	0.0208945	0.00541459	0.00454207	0.0446578	0.0454429	0.245572	0.252312	942.6	0.0416669	0.0283336	0.276583	0.22146	0.113813	0.0739068	0.018608	0.00930873	446.2	0.0827789	0.0723307	0.190368	0.180623	0.0305141	0.0232443	0.0133331	0.0122522	0.58273	0.537211	0.350406	0.32759	362.6	0.014811	0.012227	0.13805	0.132263	0.062809	0.057174	0.214834	0.219998	548.21	0.047238	0.047379	0.077133
458.94	0.101568	0.101843	0.450724	0.467653	0.00588425	0.00275607	0.0216959	0.0201722	0.0056166	0.00438506	0.043209	0.043872	0.235283	0.24359	942.8	0.0412577	0.028379	0.276551	0.221792	0.114249	0.0740231	0.0185359	0.00932371	446.4	0.0826665	0.0723164	0.190437	0.180587	0.0304453	0.0232397	0.0134097	0.0122497	0.581808	0.537104	0.349902	0.327525	362.8	0.014235	0.012245	0.137767	0.132395	0.062171	0.057251	0.214741	0.220075	548.41	0.046779	0.047394	0.077204
459.14	0.0976483	0.0983222	0.431665	0.451488	0.00542759	0.0026608	0.0206956	0.0194749	0.005259	0.00423348	0.0418669	0.0423554	0.224861	0.23517	943	0.0408712	0.0284243	0.276571	0.222123	0.114005	0.0741395	0.0184522	0.0093387	446.6	0.0822614	0.0723019	0.189942	0.180551	0.0296709	0.0232351	0.0135725	0.0122473	0.580757	0.536997	0.349221	0.32746	363	0.014234	0.012263	0.13783	0.132526	0.061872	0.057328	0.214375	0.220152	548.61	0.046621	0.047408	0.077642
459.34	0.0938945	0.0949234	0.413926	0.435881	0.00502269	0.00256882	0.0199789	0.0188017	0.00539876	0.00408714	0.0408816	0.0408913	0.215501	0.22704	943.2	0.0412245	0.0284697	0.276726	0.222454	0.114048	0.0742558	0.0186711	0.00935369	446.8	0.0820813	0.0722876	0.18968	0.180515	0.029366	0.0232305	0.0136281	0.0122448	0.580152	0.53689	0.348949	0.327395	363.2	0.013872	0.012281	0.13727	0.132657	0.061287	0.057405	0.214188	0.220229	548.81	0.046612	0.047423	0.077206
459.54	0.0902043	0.0916421	0.397087	0.420813	0.00495276	0.00248002	0.0194626	0.0181517	0.005691	0.00394585	0.0400101	0.0394777	0.206814	0.219192	943.4	0.0419521	0.0285151	0.277425	0.222785	0.11452	0.0743721	0.0191884	0.00936867	447	0.0813848	0.0722731	0.189007	0.180479	0.0291189	0.0232258	0.0131466	0.0122424	0.578648	0.536783	0.347966	0.327329	363.4	0.013942	0.012299	0.137049	0.132788	0.061647	0.057481	0.214122	0.220305	549.01	0.047189	0.047437	0.077371
459.74	0.0870273	0.0884742	0.380963	0.406266	0.00508464	0.00239429	0.019058	0.0175243	0.00580681	0.00380945	0.0389515	0.0381131	0.198261	0.211615	943.6	0.0418575	0.0285604	0.278086	0.223116	0.114734	0.0744884	0.0186678	0.00938365	447.2	0.0809097	0.0722588	0.188278	0.180443	0.0291573	0.0232212	0.0132958	0.01224	0.577978	0.536676	0.347764	0.327264	363.6	0.013844	0.012317	0.137146	0.132919	0.061402	0.057558	0.214147	0.220381	549.21	0.046458	0.047452	0.076619
459.94	0.0840879	0.0854159	0.366086	0.392222	0.00514259	0.00231153	0.0181331	0.0169185	0.00559921	0.00367777	0.0376538	0.0367956	0.190137	0.2043	943.8	0.0412954	0.0286058	0.277785	0.223447	0.114133	0.0746047	0.017589	0.00939864	447.4	0.0809968	0.0722444	0.187997	0.180407	0.0289779	0.0232166	0.0139576	0.0122375	0.577452	0.536569	0.347348	0.327199	363.8	0.013886	0.012335	0.137298	0.13305	0.061704	0.057635	0.214497	0.220457	549.41	0.046562	0.047466	0.076942
460.14	0.0812313	0.0824632	0.35177	0.378664	0.00549366	0.00223162	0.0176118	0.0163337	0.00568491	0.00355063	0.036958	0.0355236	0.183097	0.197237	944	0.0408477	0.0286511	0.277764	0.223778	0.114073	0.074721	0.0172839	0.00941362	447.6	0.0804577	0.07223	0.188153	0.180371	0.0295534	0.023212	0.014002	0.0122351	0.576698	0.536462	0.346965	0.327134	364	0.014061	0.012353	0.137431	0.13318	0.061988	0.057711	0.214539	0.220533	549.61	0.046335	0.04748	0.076738
460.34	0.0784191	0.0796126	0.337927	0.365574	0.00539912	0.00215448	0.0167569	0.015769	0.0053119	0.00342789	0.0365651	0.0342956	0.176023	0.190419	944.2	0.0406459	0.0286965	0.278024	0.224109	0.113922	0.0748373	0.0168119	0.0094286	447.8	0.0805276	0.0722156	0.188071	0.180335	0.0297874	0.0232073	0.0139913	0.0122326	0.575865	0.536356	0.346801	0.327069	364.2	0.014163	0.012371	0.137698	0.133311	0.062091	0.057788	0.214812	0.220608	549.81	0.04558	0.047494	0.076168
460.54	0.0752668	0.0768605	0.324568	0.352937	0.00512833	0.00208	0.0158528	0.0152239	0.00532795	0.0033094	0.0360235	0.0331101	0.169367	0.183837	944.4	0.0409815	0.0287418	0.277991	0.22444	0.113612	0.0749535	0.016474	0.00944358	448	0.0803993	0.0722012	0.187969	0.180299	0.0296059	0.0232027	0.0140374	0.0122302	0.575471	0.536249	0.346731	0.327004	364.4	0.014094	0.012389	0.138276	0.133441	0.062243	0.057864	0.215442	0.220683	550.01	0.045845	0.047509	0.076427
460.74	0.0725448	0.0742036	0.312027	0.340737	0.00472062	0.0020081	0.0154364	0.0146977	0.00529485	0.003195	0.0352645	0.0319656	0.163286	0.177482	944.6	0.0412289	0.0287872	0.278725	0.22477	0.114077	0.0750698	0.0163239	0.00945856	448.2	0.0797238	0.0721868	0.187869	0.180264	0.0299017	0.0231981	0.0139614	0.0122278	0.574445	0.536142	0.346387	0.326938	364.6	0.014393	0.012407	0.138821	0.133571	0.062291	0.057941	0.216111	0.220757	550.21	0.046029	0.047523	0.076804
460.94	0.0700759	0.0716385	0.299802	0.328958	0.00395201	0.00193868	0.0144846	0.0141896	0.00491477	0.00308455	0.033754	0.0308606	0.157195	0.171347	944.8	0.0410637	0.0288325	0.279383	0.225101	0.114175	0.075186	0.0157976	0.00947354	448.4	0.0793888	0.0721725	0.187683	0.180228	0.0297833	0.0231935	0.0137018	0.0122253	0.573742	0.536035	0.345789	0.326873	364.8	0.014897	0.012425	0.138822	0.1337	0.063331	0.058017	0.216272	0.220832	550.41	0.046531	0.047537	0.076874
461.14	0.0676717	0.0691622	0.287956	0.317587	0.00349877	0.00187167	0.0138727	0.0136991	0.00464142	0.00297793	0.0323904	0.0297938	0.15099	0.165424	945	0.0409827	0.0288779	0.279592	0.225431	0.114456	0.0753022	0.0160562	0.00948852	448.6	0.0789124	0.0721581	0.187269	0.180192	0.0295001	0.0231889	0.0131806	0.0122229	0.572936	0.535928	0.345913	0.326808	365	0.014629	0.012443	0.139088	0.13383	0.062975	0.058094	0.216141	0.220906	550.61	0.04696	0.047551	0.077045
461.34	0.0653005	0.0667713	0.277262	0.306608	0.00323869	0.00180697	0.0133974	0.0132255	0.00448398	0.00287499	0.0308366	0.0287639	0.145174	0.159705	945.2	0.0410687	0.0289232	0.280408	0.225761	0.114918	0.0754184	0.0161215	0.0095035	448.8	0.0790221	0.0721437	0.187476	0.180156	0.0302674	0.0231842	0.0133405	0.0122205	0.57232	0.535822	0.345943	0.326743	365.2	0.014615	0.012461	0.139283	0.133959	0.063019	0.05817	0.216425	0.220979	550.81	0.046661	0.047564	0.076179
461.54	0.0626691	0.0644632	0.266753	0.29601	0.00286176	0.0017445	0.012845	0.0127683	0.0037747	0.0027756	0.028629	0.0277696	0.13958	0.154185	945.4	0.0418578	0.0289685	0.280899	0.226092	0.115334	0.0755346	0.0161014	0.00951848	449	0.0791495	0.0721293	0.187444	0.18012	0.0306851	0.0231796	0.0128587	0.012218	0.571897	0.535715	0.345246	0.326678	365.4	0.01435	0.012479	0.139097	0.134088	0.062883	0.058246	0.216878	0.221053	551.01	0.046985	0.047578	0.07662
461.74	0.0604201	0.0622348	0.25664	0.285777	0.00289081	0.0016842	0.012568	0.012327	0.00321791	0.00267966	0.0264832	0.0268096	0.134392	0.148855	945.6	0.0424252	0.0290139	0.281229	0.226422	0.116108	0.0756508	0.0164402	0.00953346	449.2	0.0791832	0.072115	0.187631	0.180084	0.0308962	0.023175	0.0131537	0.0122156	0.571248	0.535608	0.344947	0.326613	365.6	0.013996	0.012497	0.138664	0.134217	0.062775	0.058323	0.21726	0.221126	551.21	0.046979	0.047592	0.076185
461.94	0.0587703	0.0600835	0.247139	0.275898	0.00317864	0.00162598	0.0130879	0.0119008	0.00333438	0.00258703	0.0251334	0.0258829	0.130628	0.143709	945.8	0.0422572	0.0290592	0.281708	0.226752	0.116514	0.075767	0.0160326	0.00954843	449.4	0.0789062	0.0721006	0.187338	0.180048	0.0305373	0.0231704	0.0127736	0.0122132	0.570836	0.535502	0.344522	0.326548	365.8	0.013854	0.012515	0.138567	0.134346	0.063052	0.058399	0.217696	0.221198	551.41	0.047187	0.047606	0.076298
462.14	0.0568102	0.0580065	0.237966	0.266361	0.00313373	0.00156977	0.0133126	0.0114895	0.003111	0.0024976	0.0242592	0.0249881	0.126421	0.138741	946	0.0423605	0.0291045	0.282273	0.227082	0.11673	0.0758831	0.0169257	0.00956341	449.6	0.0796669	0.0720863	0.187534	0.180012	0.0310596	0.0231658	0.0131048	0.0122107	0.570948	0.535395	0.344749	0.326483	366	0.013476	0.012533	0.138863	0.134474	0.063028	0.058475	0.217893	0.221271	551.61	0.047221	0.047619	0.076724
462.34	0.0549832	0.0560013	0.229735	0.257154	0.00293629	0.00151551	0.0131676	0.0110923	0.00298735	0.00241126	0.0227676	0.0241243	0.122197	0.133945	946.2	0.0428038	0.0291499	0.283037	0.227412	0.117173	0.0759992	0.0174992	0.00957838	449.8	0.0802698	0.0720719	0.187572	0.179977	0.0317999	0.0231612	0.0131534	0.0122083	0.570248	0.535288	0.344919	0.326418	366.2	0.013618	0.012551	0.138773	0.134603	0.063169	0.058551	0.21825	0.221343	551.81	0.04646	0.047633	0.076695
462.54	0.0538466	0.0540655	0.221324	0.248264	0.00270781	0.00146312	0.012857	0.0107089	0.00247272	0.00232791	0.0213847	0.0232904	0.118029	0.129315	946.4	0.0433382	0.0291952	0.283248	0.227741	0.117604	0.0761154	0.0180133	0.00959336	450	0.080584	0.0720576	0.187529	0.179941	0.0317605	0.0231566	0.0127314	0.0122059	0.569476	0.535182	0.344507	0.326353	366.4	0.013298	0.012569	0.138625	0.134731	0.063105	0.058627	0.21835	0.221415	552.01	0.046053	0.047647	0.07724
462.74	0.0522451	0.0521966	0.213452	0.239682	0.00271424	0.00141254	0.0126179	0.0103387	0.00234975	0.00224744	0.0206093	0.0224853	0.11408	0.124845	946.6	0.0431252	0.0292405	0.283025	0.228071	0.117974	0.0762315	0.018362	0.00960833	450.2	0.080757	0.0720432	0.187337	0.179905	0.0314728	0.0231519	0.0125034	0.0122034	0.568714	0.535075	0.344296	0.326288	366.6	0.013252	0.012587	0.139026	0.134859	0.062615	0.058703	0.218501	0.221486	552.21	0.046606	0.04766	0.077378
462.94	0.0505064	0.0503922	0.206136	0.231397	0.00235247	0.00136372	0.0122745	0.00998129	0.00242177	0.00216975	0.0197877	0.021708	0.110015	0.120529	946.8	0.0429175	0.0292858	0.28328	0.228401	0.118374	0.0763476	0.0184341	0.00962331	450.4	0.0809989	0.0720289	0.187784	0.179869	0.0314921	0.0231473	0.012694	0.012201	0.568312	0.534969	0.344281	0.326223	366.8	0.012999	0.012605	0.138865	0.134986	0.062468	0.058779	0.218431	0.221557	552.41	0.046241	0.047673	0.07695
463.14	0.0489023	0.0486503	0.199248	0.223398	0.00204977	0.00131657	0.0122786	0.00963625	0.0023551	0.00209474	0.0188298	0.0209576	0.10623	0.116363	947	0.0428886	0.0293311	0.283904	0.22873	0.118238	0.0764636	0.0187068	0.00963828	450.6	0.0810557	0.0720145	0.187841	0.179833	0.0314521	0.0231427	0.0133411	0.0121986	0.568191	0.534862	0.344411	0.326158	367	0.013224	0.012623	0.139164	0.135114	0.062296	0.058855	0.217942	0.221628	552.61	0.045738	0.047687	0.076342
463.34	0.0475736	0.0469685	0.193045	0.215675	0.00241653	0.00127106	0.0126489	0.00930315	0.00223483	0.00202233	0.0182094	0.0202332	0.103093	0.11234	947.2	0.0428999	0.0293765	0.28408	0.22906	0.118737	0.0765797	0.0189358	0.00965325	450.8	0.0811532	0.0720002	0.188081	0.179797	0.0316196	0.0231381	0.0136372	0.0121962	0.567867	0.534756	0.34445	0.326093	367.2	0.013685	0.012641	0.13973	0.135241	0.062877	0.058931	0.21874	0.221699	552.81	0.04607	0.0477	0.075554
463.54	0.0465188	0.0453449	0.187189	0.20822	0.00270931	0.00122712	0.0125299	0.00898155	0.00227884	0.00195242	0.0174007	0.0195337	0.100122	0.108457	947.4	0.042301	0.0294218	0.284129	0.229389	0.118559	0.0766958	0.0188713	0.00966822	451	0.080532	0.0719858	0.187454	0.179762	0.0310187	0.0231335	0.0135925	0.0121937	0.566737	0.534649	0.34349	0.326028	367.4	0.014205	0.012659	0.140435	0.135368	0.063555	0.059007	0.219229	0.221769	553.01	0.046223	0.047713	0.074986
463.74	0.0456488	0.0437774	0.181256	0.201022	0.00292992	0.00118471	0.0125211	0.00867108	0.0026838	0.00188493	0.0168465	0.0188585	0.0970513	0.104708	947.6	0.0421432	0.0294671	0.28432	0.229718	0.118296	0.0768118	0.0185833	0.0096832	451.2	0.0804454	0.0719715	0.187044	0.179726	0.0309845	0.0231289	0.0142068	0.0121913	0.566919	0.534543	0.343169	0.325963	367.6	0.014193	0.012677	0.140831	0.135495	0.063137	0.059083	0.219272	0.221839	553.21	0.045646	0.047726	0.074322
463.94	0.0444274	0.0422641	0.175752	0.194073	0.00301633	0.00114375	0.0119202	0.00837134	0.00288559	0.00181977	0.0166941	0.0182066	0.0939406	0.101088	947.8	0.0418905	0.0295124	0.284414	0.230047	0.117812	0.0769278	0.0183431	0.00969817	451.4	0.080861	0.0719572	0.187123	0.17969	0.030843	0.0231243	0.0145958	0.0121889	0.567054	0.534436	0.342919	0.325898	367.8	0.014817	0.012695	0.140944	0.135622	0.063663	0.059158	0.219612	0.221909	553.41	0.045832	0.04774	0.074616
464.14	0.0434932	0.0408031	0.170296	0.187365	0.00318907	0.00110421	0.0115513	0.00808196	0.00325124	0.00175687	0.0174485	0.0175772	0.0912163	0.0975939	948	0.0418083	0.0295577	0.284697	0.230376	0.118095	0.0770438	0.0185015	0.00971314	451.6	0.0804871	0.0719428	0.18697	0.179654	0.0310681	0.0231197	0.014431	0.0121864	0.565895	0.53433	0.342278	0.325833	368	0.015047	0.012713	0.141584	0.135749	0.063692	0.059234	0.219606	0.221979	553.61	0.04496	0.047753	0.073735
464.34	0.0426248	0.0393926	0.165328	0.180888	0.00316617	0.00106604	0.0109454	0.00780258	0.00333434	0.00169614	0.0183335	0.0169696	0.0884519	0.0942203	948.2	0.0419619	0.029603	0.285282	0.230705	0.118171	0.0771599	0.0184378	0.0097281	451.8	0.0801662	0.0719285	0.186154	0.179618	0.030575	0.0231151	0.014048	0.012184	0.565163	0.534223	0.342178	0.325768	368.2	0.015618	0.012731	0.142527	0.135875	0.063747	0.05931	0.220261	0.222048	553.81	0.044618	0.047766	0.073318
464.54	0.0413881	0.0380309	0.160444	0.174635	0.00314558	0.00102919	0.010509	0.00753286	0.00346622	0.0016375	0.0188168	0.016383	0.0859123	0.0909633	948.4	0.0420003	0.0296483	0.285373	0.231034	0.117742	0.0772758	0.0180869	0.00974307	452	0.0798043	0.0719142	0.185518	0.179583	0.030219	0.0231105	0.0140322	0.0121816	0.564519	0.534117	0.341488	0.325704	368.4	0.015809	0.012749	0.143154	0.136001	0.06389	0.059385	0.21996	0.222117	554.01	0.0448	0.047779	0.073358
464.74	0.0404906	0.0367163	0.155559	0.168598	0.00286039	0.00099362	0.0100541	0.00727246	0.003279	0.0015809	0.0189198	0.0158167	0.0831634	0.0878188	948.6	0.0415526	0.0296936	0.286199	0.231363	0.118044	0.0773918	0.0176899	0.00975804	452.2	0.0790726	0.0718999	0.184966	0.179547	0.030069	0.0231059	0.0137021	0.0121792	0.563663	0.534011	0.341188	0.325639	368.6	0.016225	0.012767	0.142381	0.136127	0.063908	0.059461	0.219747	0.222185	554.21	0.044978	0.047791	0.073719
464.94	0.0398316	0.0354471	0.150629	0.16277	0.00278401	0.00095927	0.00972691	0.00702107	0.00338142	0.00152625	0.0188913	0.0152699	0.0805817	0.0847831	948.8	0.041137	0.0297389	0.286145	0.231692	0.117533	0.0775078	0.0170496	0.00977301	452.4	0.0791417	0.0718856	0.184584	0.179511	0.0301728	0.0231013	0.0136568	0.0121767	0.563147	0.533904	0.341192	0.325574	368.8	0.016875	0.012785	0.142362	0.136253	0.064261	0.059536	0.219088	0.222254	554.41	0.04541	0.047804	0.073614
465.14	0.0389516	0.0342217	0.146057	0.157143	0.00282898	0.00092611	0.00951515	0.00677836	0.00357129	0.00147349	0.01855	0.0147421	0.0779849	0.0818523	949	0.0409608	0.0297841	0.286205	0.23202	0.117413	0.0776237	0.0167531	0.00978797	452.6	0.0787899	0.0718712	0.184086	0.179475	0.0298463	0.0230967	0.0134623	0.0121743	0.562402	0.533798	0.34086	0.325509	369	0.016746	0.012802	0.141659	0.136379	0.063454	0.059612	0.218445	0.222322	554.61	0.045619	0.047817	0.073902
465.34	0.0384092	0.0330387	0.142165	0.151711	0.00308296	0.00089409	0.0094297	0.00654405	0.00375451	0.00142255	0.018715	0.0142325	0.0761852	0.0790229	949.2	0.0412194	0.0298294	0.287106	0.232349	0.11775	0.0777396	0.0161429	0.00980294	452.8	0.0785652	0.0718569	0.18401	0.17944	0.0296062	0.0230921	0.0133733	0.0121719	0.562228	0.533692	0.340101	0.325444	369.2	0.016994	0.01282	0.141686	0.136504	0.063744	0.059687	0.218514	0.22239	554.81	0.046111	0.04783	0.07398
465.54	0.0376082	0.0318966	0.138068	0.146467	0.00327702	0.00086319	0.00968132	0.00631783	0.00379284	0.00137338	0.0183763	0.0137405	0.0742822	0.0762912	949.4	0.0412204	0.0298747	0.286938	0.232677	0.118039	0.0778556	0.0160175	0.00981791	453	0.0784621	0.0718426	0.183751	0.179404	0.0290806	0.0230875	0.0128053	0.0121695	0.561322	0.533585	0.339727	0.325379	369.4	0.016862	0.012838	0.141393	0.13663	0.063841	0.059762	0.218706	0.222457	555.01	0.04633	0.047842	0.074723
465.74	0.0371104	0.030794	0.134499	0.141404	0.00373073	0.00083335	0.0101336	0.00609944	0.00413693	0.0013259	0.0186239	0.0132655	0.0724039	0.0736539	949.6	0.0413172	0.02992	0.287168	0.233006	0.118392	0.0779715	0.0162312	0.00983287	453.2	0.0784491	0.0718283	0.184072	0.179368	0.0290577	0.0230829	0.012984	0.0121671	0.561515	0.533479	0.340153	0.325315	369.6	0.017124	0.012856	0.141261	0.136755	0.063957	0.059838	0.21863	0.222524	555.21	0.046669	0.047855	0.075508
465.94	0.0362731	0.0297296	0.130903	0.136516	0.00376085	0.00080454	0.0103011	0.00588859	0.00415884	0.00128007	0.0188933	0.0128069	0.0708277	0.0711079	949.8	0.041277	0.0299653	0.287698	0.233334	0.118191	0.0780874	0.0162601	0.00984783	453.4	0.0780822	0.071814	0.183897	0.179333	0.0290886	0.0230783	0.0129489	0.0121646	0.56156	0.533373	0.340087	0.32525	369.8	0.016797	0.012874	0.141404	0.13688	0.06364	0.059913	0.218812	0.222591	555.41	0.046727	0.047868	0.076156
466.14	0.034779	0.0287019	0.126753	0.131797	0.00322369	0.00077673	0.00972766	0.00568503	0.0034659	0.00123582	0.0183711	0.0123642	0.0683058	0.0686498	950	0.0417459	0.0300105	0.288281	0.233662	0.118713	0.0782033	0.0169775	0.0098628	453.6	0.0782852	0.0717997	0.183778	0.179297	0.0293282	0.0230737	0.012804	0.0121622	0.561557	0.533267	0.340534	0.325185	370	0.016579	0.012892	0.141454	0.137004	0.063458	0.059988	0.218745	0.222658	555.61	0.047122	0.04788	0.076862
466.34	0.0337348	0.0277097	0.122953	0.127241	0.00287548	0.00074988	0.00936334	0.00548851	0.00314075	0.0011931	0.0176042	0.0119368	0.0660859	0.0662767	950.2	0.041757	0.0300558	0.288115	0.23399	0.118974	0.0783191	0.0169763	0.00987776	453.8	0.0774104	0.0717854	0.183562	0.179261	0.0291065	0.0230691	0.0117954	0.0121598	0.560527	0.53316	0.340392	0.32512	370.2	0.017033	0.01291	0.141534	0.137129	0.063142	0.060064	0.218658	0.222724	555.81	0.047343	0.047892	0.078
466.54	0.032765	0.0267518	0.119632	0.122842	0.00304176	0.00072396	0.00908232	0.00529879	0.00318319	0.00115186	0.0171162	0.0115242	0.0645221	0.0639857	950.4	0.0418394	0.0301011	0.288207	0.234318	0.119583	0.078435	0.017367	0.00989272	454	0.0772519	0.0717711	0.183098	0.179225	0.0285912	0.0230645	0.0114961	0.0121574	0.56079	0.533054	0.340193	0.325056	370.4	0.016771	0.012928	0.141679	0.137253	0.062968	0.060139	0.218712	0.22279	556.01	0.047786	0.047905	0.079079
466.74	0.0319222	0.0258271	0.11662	0.118596	0.00341554	0.00069893	0.00901619	0.00511562	0.00316274	0.00111204	0.0167249	0.0111258	0.0627248	0.0617738	950.6	0.0413613	0.0301463	0.288016	0.234646	0.119529	0.0785508	0.017147	0.00990768	454.2	0.0775411	0.0717568	0.183349	0.17919	0.0287076	0.0230599	0.0115435	0.0121549	0.560435	0.532948	0.340366	0.324991	370.6	0.016272	0.012945	0.141641	0.137377	0.062691	0.060214	0.218714	0.222856	556.21	0.048467	0.047917	0.07959
466.94	0.0315254	0.0249343	0.113732	0.114496	0.0036811	0.00067477	0.00901285	0.00493878	0.00373123	0.0010736	0.0164694	0.0107412	0.0610835	0.0596384	950.8	0.0409228	0.0301916	0.288242	0.234974	0.120055	0.0786667	0.0169635	0.00992264	454.4	0.0772822	0.0717425	0.183476	0.179154	0.0289005	0.0230553	0.0118763	0.0121525	0.560328	0.532842	0.340791	0.324926	370.8	0.015997	0.012963	0.141767	0.137501	0.062624	0.060289	0.218707	0.222922	556.41	0.04756	0.047929	0.079327
467.14	0.0309786	0.0240723	0.111407	0.110538	0.00396072	0.00065145	0.00909681	0.00476806	0.00421566	0.00103649	0.0164069	0.0103699	0.0595061	0.0575768	951	0.0409947	0.0302369	0.288726	0.235301	0.11993	0.0787825	0.0172041	0.0099376	454.6	0.076831	0.0717282	0.183282	0.179118	0.0289561	0.0230507	0.0119232	0.0121501	0.559985	0.532736	0.340604	0.324861	371	0.016174	0.012981	0.14216	0.137625	0.063133	0.060364	0.219235	0.222987	556.61	0.047726	0.047942	0.079262
467.34	0.0306731	0.0232402	0.109464	0.106717	0.00428992	0.00062893	0.00933542	0.00460323	0.00464154	0.00100066	0.0166471	0.0100115	0.0580879	0.0555865	951.2	0.041615	0.0302821	0.288856	0.235629	0.120469	0.0788983	0.0177443	0.00995256	454.8	0.0760854	0.0717139	0.182917	0.179083	0.0286546	0.0230461	0.0118908	0.0121477	0.559552	0.53263	0.340336	0.324797	371.2	0.015817	0.012999	0.142952	0.137749	0.063676	0.060439	0.220472	0.223052	556.81	0.048428	0.047954	0.078884
467.54	0.0302768	0.0224369	0.107313	0.103028	0.00419291	0.00060719	0.00939302	0.00444411	0.00527349	0.00096607	0.0164329	0.00966538	0.0567314	0.053665	951.4	0.0423167	0.0303274	0.289334	0.235956	0.120612	0.0790141	0.0182856	0.00996752	455	0.0756712	0.0716997	0.182613	0.179047	0.0283814	0.0230415	0.0116988	0.0121453	0.559209	0.532524	0.339768	0.324732	371.4	0.015472	0.013017	0.143067	0.137872	0.063823	0.060514	0.220681	0.223117	557.01	0.048145	0.047966	0.078937
467.74	0.0297631	0.0216612	0.104919	0.0994666	0.00457248	0.0005862	0.0098402	0.00429049	0.00599136	0.00093267	0.0162003	0.00933127	0.0556658	0.0518099	951.6	0.0429787	0.0303726	0.289887	0.236284	0.120643	0.0791298	0.0181752	0.00998248	455.2	0.0758832	0.0716854	0.182499	0.179011	0.0282567	0.023037	0.0117296	0.0121428	0.558926	0.532418	0.339751	0.324667	371.6	0.014531	0.013035	0.142837	0.137995	0.063273	0.060589	0.220773	0.223181	557.21	0.047707	0.047978	0.078832
467.94	0.0291969	0.0209125	0.102774	0.0960283	0.0051031	0.00056593	0.00972049	0.00414217	0.00616079	0.00090043	0.0161001	0.0090087	0.0547	0.0500189	951.8	0.0428011	0.0304179	0.290277	0.236611	0.120671	0.0792456	0.0179019	0.00999744	455.4	0.0759273	0.0716711	0.182657	0.178976	0.0283254	0.0230324	0.0116919	0.0121404	0.557926	0.532312	0.33926	0.324603	371.8	0.014685	0.013053	0.143148	0.138119	0.06386	0.060663	0.221605	0.223245	557.41	0.047072	0.04799	0.078607
468.14	0.0287401	0.0201896	0.100667	0.0927088	0.00509932	0.00054637	0.00927455	0.00399899	0.00585658	0.00086931	0.0160996	0.00869729	0.0536682	0.0482899	952	0.0433772	0.0304631	0.291028	0.236938	0.120941	0.0793613	0.0176293	0.0100124	455.6	0.0752936	0.0716568	0.181806	0.17894	0.0278357	0.0230278	0.0111947	0.012138	0.556248	0.532206	0.338282	0.324538	372	0.014578	0.01307	0.143609	0.138241	0.064119	0.060738	0.221542	0.223309	557.61	0.046712	0.048002	0.078168
468.34	0.0280836	0.0194916	0.0984233	0.089504	0.00472202	0.00052748	0.00918956	0.00386075	0.00550428	0.00083926	0.0157925	0.00839664	0.0525576	0.0466206	952.2	0.0437023	0.0305084	0.291525	0.237265	0.120777	0.0794771	0.0177405	0.0100274	455.8	0.0751519	0.0716426	0.181807	0.178904	0.0276837	0.0230232	0.0110786	0.0121356	0.555894	0.5321	0.338443	0.324473	372.2	0.014924	0.013088	0.143987	0.138364	0.064481	0.060813	0.221793	0.223373	557.81	0.046576	0.048014	0.07777
468.54	0.0275057	0.0188179	0.0961595	0.08641	0.00453416	0.00050925	0.00919953	0.00372729	0.00526315	0.00081024	0.0154805	0.00810639	0.0517549	0.045009	952.4	0.0441763	0.0305536	0.292347	0.237592	0.120881	0.0795928	0.0176232	0.0100423	456	0.0752177	0.0716283	0.181932	0.178869	0.0278221	0.0230186	0.0111436	0.0121332	0.555065	0.531994	0.337835	0.324409	372.4	0.014933	0.013106	0.143969	0.138487	0.064989	0.060888	0.221664	0.223436	558.01	0.046457	0.048026	0.078323
468.74	0.0269149	0.0181674	0.0937713	0.083423	0.00437645	0.00049165	0.00943025	0.00359844	0.00516536	0.00078224	0.0150668	0.00782616	0.0510189	0.0434531	952.6	0.0441938	0.0305989	0.292927	0.237919	0.120921	0.0797085	0.017556	0.0100573	456.2	0.0751517	0.071614	0.182257	0.178833	0.0281688	0.023014	0.0109247	0.0121307	0.55483	0.531888	0.337536	0.324344	372.6	0.015203	0.013124	0.143661	0.138609	0.065207	0.060962	0.221837	0.223499	558.21	0.046287	0.048037	0.078219
468.94	0.0260208	0.0175393	0.0913356	0.0805392	0.00393369	0.00047465	0.0092211	0.00347405	0.00479526	0.00075519	0.0145056	0.00755563	0.0503185	0.041951	952.8	0.044502	0.0306441	0.293473	0.238246	0.120739	0.0798242	0.017598	0.0100722	456.4	0.0759368	0.0715998	0.182457	0.178798	0.0289926	0.0230094	0.0114826	0.0121283	0.555093	0.531782	0.337482	0.32428	372.8	0.01549	0.013142	0.143799	0.138731	0.065481	0.061037	0.221749	0.223562	558.41	0.046923	0.048049	0.077862
469.14	0.0253956	0.0169331	0.0891973	0.0777551	0.00350138	0.00045824	0.00920361	0.00335396	0.00443962	0.00072909	0.0140683	0.00729445	0.0496924	0.0405009	953	0.0447039	0.0306893	0.293811	0.238573	0.120759	0.0799399	0.0174419	0.0100872	456.6	0.0761861	0.0715855	0.183093	0.178762	0.0292222	0.0230049	0.0116608	0.0121259	0.554879	0.531676	0.337148	0.324215	373	0.015009	0.013159	0.143774	0.138853	0.065348	0.061111	0.221696	0.223625	558.61	0.047147	0.048061	0.077973
469.34	0.0252889	0.0163477	0.0874495	0.0750673	0.00360712	0.0004424	0.00934485	0.00323802	0.00421838	0.00070389	0.0140667	0.00704229	0.049239	0.0391008	953.2	0.0448577	0.0307346	0.294641	0.2389	0.120962	0.0800556	0.0176177	0.0101021	456.8	0.0763411	0.0715713	0.183411	0.178726	0.0291137	0.0230003	0.0116733	0.0121235	0.554856	0.53157	0.336585	0.32415	373.2	0.015109	0.013177	0.143628	0.138975	0.065495	0.061186	0.221739	0.223687	558.81	0.047447	0.048072	0.077442
469.54	0.0248408	0.0157826	0.0854501	0.0724724	0.0036052	0.00042711	0.0093861	0.00312609	0.00366394	0.00067955	0.0132646	0.00679885	0.0482853	0.0377492	953.4	0.0442175	0.0307798	0.294427	0.239226	0.120956	0.0801712	0.0176457	0.0101171	457	0.0766734	0.071557	0.183707	0.178691	0.0295276	0.0229957	0.0122767	0.0121211	0.554846	0.531464	0.336456	0.324086	373.4	0.014836	0.013195	0.143617	0.139096	0.065482	0.06126	0.221611	0.223749	559.01	0.047079	0.048084	0.07703
469.74	0.0243336	0.015237	0.0833087	0.0699671	0.00342034	0.00041234	0.00923706	0.00301803	0.00285675	0.00065606	0.0128146	0.00656383	0.0474769	0.0364443	953.6	0.0438716	0.030825	0.294765	0.239553	0.120991	0.0802868	0.0176221	0.010132	457.2	0.0769183	0.0715428	0.183775	0.178655	0.0301783	0.0229911	0.0126639	0.0121187	0.55508	0.531358	0.336838	0.324021	373.6	0.015047	0.013213	0.144333	0.139218	0.065393	0.061335	0.222014	0.223811	559.21	0.046898	0.048095	0.076889
469.94	0.0233774	0.0147103	0.0808991	0.0675485	0.0030065	0.00039809	0.00896557	0.0029137	0.00202163	0.00063338	0.012321	0.00633693	0.0465342	0.0351845	953.8	0.0441332	0.0308702	0.295096	0.239879	0.120973	0.0804025	0.0185102	0.010147	457.4	0.0767634	0.0715285	0.18335	0.17862	0.0302624	0.0229865	0.0128786	0.0121163	0.554733	0.531252	0.336289	0.323957	373.8	0.01511	0.013231	0.144493	0.139339	0.065649	0.061409	0.222267	0.223873	559.41	0.047327	0.048107	0.076443
470.14	0.0223849	0.0142018	0.0785716	0.0652135	0.00255615	0.00038433	0.00849106	0.00281298	0.00170537	0.00061149	0.0118164	0.00611788	0.0454022	0.0339682	954	0.0440852	0.0309155	0.295272	0.240206	0.12169	0.0805181	0.0187393	0.0101619	457.6	0.0771735	0.0715143	0.183033	0.178584	0.0306169	0.022982	0.0128968	0.0121139	0.555046	0.531147	0.33614	0.323892	374	0.015338	0.013248	0.144489	0.13946	0.065695	0.061483	0.222376	0.223934	559.61	0.048127	0.048118	0.076825
470.34	0.0218989	0.0137109	0.0770253	0.0629592	0.00275244	0.00037104	0.00809868	0.00271574	0.00179163	0.00059035	0.0117421	0.00590639	0.0443832	0.032794	954.2	0.0434128	0.0309607	0.295111	0.240532	0.121479	0.0806337	0.018933	0.0101769	457.8	0.0769329	0.0715	0.182997	0.178548	0.0308622	0.0229774	0.012956	0.0121114	0.554799	0.531041	0.335728	0.323828	374.2	0.015455	0.013266	0.144605	0.139581	0.065287	0.061558	0.221996	0.223995	559.81	0.047826	0.04813	0.076675
470.54	0.0220535	0.0132369	0.0762527	0.0607828	0.00355236	0.00035822	0.00814927	0.00262186	0.00235069	0.00056994	0.0127334	0.00570222	0.0439045	0.0316604	954.4	0.0438434	0.0310059	0.295565	0.240858	0.121957	0.0807493	0.019504	0.0101918	458	0.0779797	0.0714858	0.182992	0.178513	0.0309563	0.0229728	0.0135447	0.012109	0.555756	0.530935	0.336133	0.323763	374.4	0.015075	0.013284	0.144186	0.139702	0.065305	0.061632	0.221817	0.224056	560.01	0.047735	0.048141	0.076089
470.74	0.0220901	0.0127793	0.0747943	0.0586817	0.00370188	0.00034583	0.00801007	0.00253123	0.00252974	0.00055024	0.0136276	0.00550511	0.0426659	0.0305659	954.6	0.0434829	0.0310511	0.295651	0.241184	0.122138	0.0808649	0.0197403	0.0102068	458.2	0.0782732	0.0714715	0.183306	0.178477	0.031158	0.0229682	0.0136148	0.0121066	0.555345	0.530829	0.336025	0.323699	374.6	0.01481	0.013302	0.144025	0.139822	0.065006	0.061706	0.22169	0.224117	560.21	0.047576	0.048152	0.07567
470.94	0.0221322	0.0123376	0.0732905	0.0566532	0.00341339	0.00033388	0.00763385	0.00244373	0.00288987	0.00053122	0.0141966	0.0053148	0.0417801	0.0295093	954.8	0.0434259	0.0310963	0.296225	0.24151	0.123295	0.0809804	0.0198958	0.0102217	458.4	0.0780612	0.0714573	0.183141	0.178442	0.0308606	0.0229636	0.0135454	0.0121042	0.555351	0.530724	0.335784	0.323634	374.8	0.015124	0.013319	0.144509	0.139942	0.064978	0.06178	0.222467	0.224177	560.41	0.047126	0.048164	0.075356
471.14	0.0219494	0.0119111	0.0722896	0.0546948	0.00328444	0.00032234	0.00728009	0.00235925	0.00280403	0.00051286	0.014507	0.00513108	0.0405174	0.0284893	955	0.043686	0.0311415	0.296683	0.241836	0.123321	0.081096	0.019956	0.0102367	458.6	0.078034	0.0714431	0.18325	0.178406	0.0306454	0.0229591	0.0138486	0.0121018	0.555132	0.530618	0.335737	0.32357	375	0.014884	0.013337	0.144409	0.140062	0.065036	0.061854	0.223063	0.224237	560.61	0.047644	0.048175	0.075493
471.34	0.0216334	0.0114994	0.0710788	0.0528041	0.00356806	0.0003112	0.00726005	0.0022777	0.00259781	0.00049513	0.0145226	0.00495371	0.0392924	0.0275044	955.2	0.0439875	0.0311867	0.296862	0.242162	0.123506	0.0812115	0.0200702	0.0102516	458.8	0.0777615	0.0714289	0.18322	0.178371	0.0302237	0.0229545	0.0139485	0.0120994	0.555012	0.530512	0.335669	0.323506	375.2	0.014525	0.013355	0.144929	0.140182	0.064858	0.061928	0.223461	0.224297	560.81	0.048382	0.048186	0.075705
471.54	0.0209606	0.0111018	0.0698703	0.0509787	0.00402789	0.00030044	0.00731747	0.00219896	0.00272453	0.00047801	0.0141728	0.00478247	0.0384311	0.0265537	955.4	0.0439195	0.0312319	0.296801	0.242487	0.123073	0.081327	0.0197041	0.0102666	459	0.0779281	0.0714146	0.183388	0.178335	0.0299126	0.0229499	0.0137654	0.012097	0.554492	0.530407	0.335497	0.323441	375.4	0.014783	0.013373	0.144776	0.140302	0.065155	0.062002	0.223468	0.224356	561.01	0.048364	0.048197	0.076263
471.74	0.0203199	0.0107181	0.068796	0.0492165	0.00439143	0.00029005	0.00711744	0.00212295	0.00266715	0.00046149	0.013573	0.00461715	0.0378812	0.0256357	955.6	0.0440054	0.0312771	0.297023	0.242813	0.1227	0.0814425	0.0194686	0.0102815	459.2	0.0776223	0.0714004	0.182911	0.1783	0.0293192	0.0229454	0.0134013	0.0120946	0.553518	0.530301	0.335051	0.323377	375.6	0.014596	0.01339	0.144998	0.140422	0.065576	0.062076	0.223619	0.224416	561.21	0.048007	0.048208	0.076178
471.94	0.0195855	0.0103476	0.067704	0.0475152	0.00425439	0.00028003	0.00663552	0.00204956	0.00212113	0.00044554	0.0131354	0.00445754	0.03732	0.0247496	955.8	0.043827	0.0313223	0.297321	0.243138	0.122598	0.081558	0.0192815	0.0102965	459.4	0.0772699	0.0713862	0.183028	0.178264	0.0288812	0.0229408	0.0128779	0.0120922	0.552956	0.530195	0.334708	0.323312	375.8	0.014944	0.013408	0.145051	0.140541	0.066096	0.06215	0.224079	0.224475	561.41	0.047692	0.048219	0.076212
472.14	0.0186501	0.00998988	0.0665456	0.0458727	0.00381747	0.00027035	0.0063002	0.00197871	0.0016948	0.00043014	0.0130315	0.00430346	0.0365796	0.023894	956	0.0444784	0.0313675	0.297771	0.243464	0.122934	0.0816735	0.019567	0.0103114	459.6	0.0767133	0.071372	0.182393	0.178229	0.0282884	0.0229362	0.0121721	0.0120897	0.552041	0.53009	0.333751	0.323248	376	0.015373	0.013426	0.145112	0.14066	0.066621	0.062224	0.224515	0.224534	561.61	0.047666	0.04823	0.076344
472.34	0.0181546	0.00964455	0.065513	0.0442869	0.00373317	0.000261	0.00620604	0.00191031	0.0015844	0.00041527	0.0129733	0.00415469	0.0360368	0.0230681	956.2	0.044997	0.0314127	0.298267	0.243789	0.123064	0.081789	0.0201714	0.0103263	459.8	0.076838	0.0713578	0.182828	0.178193	0.0282076	0.0229317	0.0119857	0.0120873	0.551983	0.529984	0.334242	0.323184	376.2	0.015063	0.013443	0.145119	0.14078	0.066581	0.062298	0.224505	0.224592	561.81	0.047374	0.048241	0.07698
472.54	0.0178757	0.00931115	0.064297	0.042756	0.0036268	0.00025198	0.00605668	0.00184428	0.00092038	0.00040091	0.0130997	0.00401107	0.0358069	0.0222706	956.4	0.0448214	0.0314579	0.298757	0.244114	0.123016	0.0819044	0.020007	0.0103413	460	0.076802	0.0713436	0.182626	0.178158	0.0280217	0.0229271	0.0116747	0.0120849	0.551239	0.529879	0.333961	0.323119	376.4	0.015164	0.013461	0.144855	0.140898	0.066711	0.062372	0.224832	0.22465	562.01	0.047102	0.048251	0.077332
472.74	0.0171765	0.00898928	0.0629795	0.041278	0.00323812	0.00024327	0.00548524	0.00178053	1.79e-06	0.00038705	0.012988	0.00387242	0.0348075	0.0215008	956.6	0.0446503	0.0315031	0.298461	0.24444	0.122408	0.0820199	0.0197446	0.0103562	460.2	0.0768458	0.0713293	0.182608	0.178122	0.0285248	0.0229225	0.0117194	0.0120825	0.551186	0.529773	0.333671	0.323055	376.6	0.015199	0.013479	0.144692	0.141017	0.066529	0.062445	0.224751	0.224709	562.21	0.047116	0.048262	0.077593
472.94	0.0164357	0.00867854	0.061643	0.0398511	0.00288379	0.00023486	0.00454445	0.00171898	-0.00065521	0.00037367	0.0126397	0.00373856	0.034074	0.0207575	956.8	0.0450701	0.0315482	0.299213	0.244765	0.122619	0.0821353	0.0197549	0.0103712	460.4	0.0772345	0.0713151	0.182761	0.178087	0.0289748	0.022918	0.0121058	0.0120801	0.550924	0.529668	0.333815	0.322991	376.8	0.014638	0.013497	0.144077	0.141136	0.065893	0.062519	0.224451	0.224766	562.41	0.046968	0.048273	0.078016
473.14	0.016531	0.00837854	0.0608044	0.0384736	0.00299603	0.00022674	0.00465744	0.00165955	-0.0005744	0.00036076	0.012305	0.00360932	0.0338178	0.02004	957	0.0451647	0.0315934	0.299079	0.24509	0.122545	0.0822507	0.0195595	0.0103861	460.6	0.0768185	0.0713009	0.182702	0.178051	0.028823	0.0229134	0.0121611	0.0120777	0.550365	0.529562	0.333514	0.322926	377	0.014375	0.013514	0.144697	0.141254	0.066243	0.062593	0.224441	0.224824	562.61	0.04663	0.048284	0.078209
473.34	0.0169787	0.00808891	0.0602231	0.0371436	0.00347316	0.0002189	0.00536795	0.00160219	-0.00019215	0.00034829	0.0124324	0.00348455	0.0336887	0.0193473	957.2	0.0450392	0.0316386	0.299555	0.245414	0.122911	0.0823661	0.0198767	0.0104011	460.8	0.0767125	0.0712867	0.182283	0.178016	0.0287688	0.0229088	0.0122412	0.0120753	0.550218	0.529457	0.333035	0.322862	377.2	0.014156	0.013532	0.144426	0.141372	0.066311	0.062666	0.224451	0.224881	562.81	0.045955	0.048294	0.07765
473.54	0.0173555	0.00780929	0.0594876	0.0358596	0.00373954	0.00021134	0.00599397	0.0015468	0.00016168	0.00033625	0.0129273	0.0033641	0.0335448	0.0186785	957.4	0.0446876	0.0316838	0.299236	0.245739	0.123132	0.0824815	0.0196393	0.010416	461	0.0769062	0.0712725	0.182047	0.17798	0.029524	0.0229043	0.0124866	0.0120729	0.550289	0.529351	0.333458	0.322798	377.4	0.014011	0.01355	0.144923	0.14149	0.066706	0.06274	0.224593	0.224939	563.01	0.045655	0.048305	0.077841
473.74	0.0175159	0.00753934	0.0584982	0.03462	0.00383443	0.00020403	0.00631914	0.00149333	0.00037813	0.00032462	0.0132502	0.00324781	0.033033	0.0180328	957.6	0.0448952	0.0317289	0.299656	0.246064	0.123674	0.0825969	0.0201206	0.0104309	461.2	0.0773234	0.0712583	0.18186	0.177945	0.0299436	0.0228997	0.0127361	0.0120705	0.550148	0.529246	0.333536	0.322733	377.6	0.01426	0.013567	0.145843	0.141608	0.067034	0.062813	0.225106	0.224995	563.21	0.045724	0.048315	0.077192
473.94	0.0178193	0.00727872	0.057618	0.0334233	0.00410729	0.00019698	0.00651483	0.00144171	0.00085749	0.0003134	0.0131687	0.00313554	0.0324106	0.0174094	957.8	0.0455473	0.0317741	0.300067	0.246389	0.123715	0.0827123	0.0203352	0.0104459	461.4	0.077582	0.0712442	0.181449	0.17791	0.0302786	0.0228951	0.0130075	0.0120681	0.550598	0.529141	0.333433	0.322669	377.8	0.0144	0.013585	0.146228	0.141726	0.067562	0.062887	0.224773	0.225052	563.41	0.0457	0.048326	0.076804
474.14	0.018378	0.00702711	0.0569564	0.0322679	0.00430536	0.00019017	0.00661258	0.00139187	0.00164659	0.00030257	0.0128583	0.00302715	0.0317577	0.0168076	958	0.0453041	0.0318193	0.300098	0.246713	0.124144	0.0828276	0.0199323	0.0104608	461.6	0.0779334	0.07123	0.181526	0.177874	0.030839	0.0228906	0.0133353	0.0120657	0.55089	0.529035	0.333643	0.322605	378	0.014257	0.013603	0.146552	0.141843	0.067413	0.06296	0.224985	0.225109	563.61	0.045758	0.048336	0.076541
474.34	0.0190753	0.0067842	0.0564067	0.0311525	0.0047718	0.00018359	0.00718665	0.00134376	0.002065	0.00029211	0.0129022	0.00292251	0.0316349	0.0162266	958.2	0.0455396	0.0318644	0.300807	0.247038	0.124628	0.0829429	0.0201385	0.0104757	461.8	0.0778504	0.0712158	0.181507	0.177839	0.0305464	0.022886	0.0132332	0.0120633	0.550646	0.52893	0.333413	0.322541	378.2	0.014261	0.01362	0.147116	0.14196	0.067496	0.063034	0.224878	0.225165	563.81	0.045139	0.048347	0.075964
474.54	0.0196841	0.00654968	0.0558066	0.0300756	0.00470584	0.00017725	0.00767453	0.00129731	0.00317525	0.00028201	0.0138054	0.00282148	0.0319337	0.0156657	958.4	0.0459435	0.0319096	0.300957	0.247362	0.125372	0.0830583	0.0201501	0.0104907	462	0.0780569	0.0712016	0.181584	0.177803	0.0304075	0.0228815	0.0129506	0.0120609	0.551019	0.528824	0.333478	0.322476	378.4	0.013878	0.013638	0.14673	0.142078	0.067101	0.063107	0.225087	0.225221	564.01	0.045311	0.048357	0.075716
474.74	0.0196524	0.00632327	0.0546647	0.0290359	0.0042796	0.00017112	0.00766946	0.00125246	0.00334597	0.00027226	0.0136612	0.00272395	0.0311714	0.0151241	958.6	0.0458153	0.0319547	0.301524	0.247686	0.126203	0.0831736	0.0202228	0.0105056	462.2	0.0779325	0.0711874	0.181728	0.177768	0.0304617	0.0228769	0.0128831	0.0120585	0.550638	0.528719	0.332982	0.322412	378.6	0.014186	0.013655	0.147442	0.142195	0.066962	0.06318	0.225816	0.225276	564.21	0.044942	0.048367	0.075592
474.94	0.0198374	0.00610469	0.0541659	0.0280322	0.00424161	0.00016521	0.00773629	0.00120917	0.00342537	0.00026285	0.013339	0.00262979	0.0310024	0.0146013	958.8	0.0456132	0.0319999	0.301592	0.24801	0.126764	0.0832889	0.0196727	0.0105206	462.4	0.0779232	0.0711732	0.181577	0.177732	0.030399	0.0228724	0.012674	0.0120561	0.550275	0.528614	0.333243	0.322348	378.8	0.014135	0.013673	0.147928	0.142311	0.066999	0.063253	0.226433	0.225332	564.41	0.045204	0.048378	0.075948
475.14	0.0199782	0.00589366	0.0538328	0.0270632	0.00448447	0.00015949	0.00802921	0.00116737	0.00361237	0.00025376	0.012931	0.00253888	0.0304304	0.0140966	959	0.0455309	0.0320451	0.301799	0.248334	0.126565	0.0834041	0.0193052	0.0105355	462.6	0.0775868	0.0711591	0.181034	0.177697	0.0304262	0.0228678	0.0126909	0.0120537	0.549372	0.528509	0.333032	0.322284	379	0.01405	0.013691	0.148302	0.142428	0.066987	0.063327	0.226313	0.225387	564.61	0.045954	0.048388	0.076057
475.34	0.0197003	0.00568993	0.053447	0.0261277	0.0049244	0.00015398	0.00863141	0.00112702	0.00391994	0.00024499	0.0120001	0.00245112	0.0298728	0.0136093	959.2	0.0456959	0.0320902	0.301894	0.248658	0.126498	0.0835194	0.0194034	0.0105504	462.8	0.0772853	0.0711449	0.180611	0.177662	0.0302575	0.0228633	0.0119881	0.0120513	0.548963	0.528403	0.332806	0.322219	379.2	0.014295	0.013708	0.14823	0.142544	0.067122	0.0634	0.226245	0.225442	564.81	0.046416	0.048398	0.07617
475.54	0.0195458	0.00549324	0.0532472	0.0252245	0.00538513	0.00014866	0.00912236	0.00108806	0.00428038	0.00023652	0.0110745	0.00236639	0.029735	0.0131389	959.4	0.0461247	0.0321354	0.302655	0.248982	0.127052	0.0836347	0.0199732	0.0105653	463	0.0772182	0.0711307	0.181072	0.177626	0.0306768	0.0228587	0.011839	0.0120489	0.548543	0.528298	0.332697	0.322155	379.4	0.014454	0.013726	0.14849	0.142661	0.06728	0.063473	0.226507	0.225497	565.01	0.046058	0.048408	0.075847
475.74	0.0196175	0.00530335	0.0530803	0.0243525	0.00558177	0.00014352	0.00932692	0.00105044	0.00432432	0.00022835	0.0106478	0.00228458	0.0298177	0.0126847	959.6	0.0465003	0.0321805	0.303223	0.249306	0.12729	0.0837499	0.0199313	0.0105803	463.2	0.0765017	0.0711166	0.180641	0.177591	0.0298913	0.0228542	0.0112272	0.0120465	0.547602	0.528193	0.331738	0.322091	379.6	0.014452	0.013744	0.148356	0.142777	0.067358	0.063546	0.226549	0.225552	565.21	0.045971	0.048418	0.075676
475.94	0.0191395	0.00512002	0.0526358	0.0235107	0.00540206	0.00013856	0.00923212	0.00101413	0.00386647	0.00022045	0.0103301	0.00220561	0.0296419	0.0122462	959.8	0.0467363	0.0322256	0.303697	0.24963	0.127664	0.0838651	0.0201407	0.0105952	463.4	0.0761061	0.0711024	0.180083	0.177556	0.0292218	0.0228496	0.0104864	0.0120441	0.546569	0.528088	0.331063	0.322027	379.8	0.014766	0.013761	0.148319	0.142893	0.067179	0.063619	0.226903	0.225606	565.41	0.046443	0.048428	0.07576
476.14	0.0184153	0.00494303	0.0520822	0.022698	0.00534297	0.00013377	0.00917655	0.00097908	0.00353201	0.00021283	0.0101652	0.00212937	0.029377	0.0118229	960	0.0469851	0.0322708	0.304117	0.249953	0.127711	0.0839804	0.0201209	0.0106101	463.6	0.0756801	0.0710883	0.179757	0.17752	0.0292551	0.022845	0.0105473	0.0120417	0.545675	0.527983	0.330381	0.321963	380	0.015099	0.013779	0.148157	0.143008	0.067247	0.063692	0.227057	0.22566	565.61	0.046534	0.048438	0.076032
476.34	0.0184335	0.00477216	0.0513731	0.0219134	0.00507515	0.00012914	0.00912432	0.00094523	0.00280266	0.00020548	0.0102498	0.00205576	0.0290132	0.0114142	960.2	0.0468041	0.0323159	0.304514	0.250277	0.127365	0.0840956	0.0200771	0.0106251	463.8	0.0758499	0.0710741	0.179622	0.177485	0.0285022	0.0228405	0.0103916	0.0120393	0.545128	0.527877	0.330646	0.321899	380.2	0.015531	0.013796	0.148495	0.143124	0.067222	0.063765	0.227206	0.225714	565.81	0.046604	0.048448	0.076625
476.54	0.018132	0.0046072	0.0504546	0.0211559	0.00457187	0.00012468	0.0086507	0.00091256	0.00195702	0.00019837	0.00989403	0.0019847	0.0287789	0.0110196	960.4	0.0462014	0.032361	0.304851	0.2506	0.127283	0.0842108	0.0196325	0.01064	464	0.0753678	0.0710599	0.17918	0.177449	0.0283114	0.022836	0.0103807	0.0120369	0.544152	0.527772	0.329742	0.321835	380.4	0.016144	0.013814	0.148266	0.143239	0.067608	0.063838	0.227422	0.225768	566.01	0.046723	0.048458	0.076318
476.74	0.0170955	0.00444794	0.0492355	0.0204245	0.00396664	0.00012037	0.00748113	0.00088101	0.00129226	0.00019152	0.00888473	0.00191609	0.0277507	0.0106387	960.6	0.0461568	0.0324062	0.305167	0.250924	0.127086	0.0843259	0.019482	0.0106549	464.2	0.074925	0.0710458	0.178737	0.177414	0.028037	0.0228314	0.0105754	0.0120345	0.543655	0.527667	0.329114	0.321771	380.6	0.016487	0.013832	0.148206	0.143354	0.067511	0.063911	0.227512	0.225821	566.21	0.046647	0.048468	0.076778
476.94	0.0163531	0.00429418	0.0484808	0.0197185	0.00368666	0.00011621	0.00720617	0.00085056	0.00139311	0.0001849	0.00821928	0.00184985	0.0273512	0.0102709	960.8	0.0462412	0.0324513	0.30588	0.251247	0.127603	0.0844411	0.0193958	0.0106699	464.4	0.0747134	0.0710316	0.178608	0.177379	0.0274945	0.0228269	0.0103935	0.0120321	0.543225	0.527562	0.328579	0.321706	380.8	0.01657	0.013849	0.148407	0.143469	0.067359	0.063983	0.227723	0.225874	566.41	0.047011	0.048478	0.077129
477.14	0.0161789	0.00414574	0.0481288	0.0190369	0.00347234	0.00011219	0.00744114	0.00082115	0.00159009	0.0001785	0.00796349	0.00178591	0.0272221	0.00991587	961	0.0460389	0.0324964	0.306174	0.25157	0.127595	0.0845562	0.0196096	0.0106848	464.6	0.0745109	0.0710175	0.178159	0.177343	0.027351	0.0228223	0.0106241	0.0120297	0.542579	0.527457	0.328342	0.321642	381	0.016687	0.013867	0.14879	0.143584	0.067841	0.064056	0.227916	0.225927	566.61	0.04762	0.048488	0.077811
477.34	0.0159166	0.00400243	0.0475124	0.0183788	0.00330003	0.00010831	0.00751129	0.00079277	0.00160285	0.00017233	0.00794622	0.00172417	0.0270699	0.0095731	961.2	0.0457184	0.0325415	0.306603	0.251893	0.127628	0.0846714	0.0195665	0.0106997	464.8	0.0744578	0.0710034	0.177979	0.177308	0.0273696	0.0228178	0.0108736	0.0120273	0.542347	0.527352	0.328355	0.321578	381.2	0.016837	0.013884	0.148371	0.143699	0.067688	0.064129	0.22776	0.22598	566.81	0.048239	0.048497	0.077882
477.54	0.015345	0.00386407	0.046546	0.0177435	0.00309481	0.00010457	0.00736262	0.00076536	0.00146998	0.00016638	0.00777427	0.00166457	0.0265721	0.00924218	961.4	0.0456287	0.0325867	0.306727	0.252216	0.127659	0.0847865	0.0194339	0.0107146	465	0.0744985	0.0709892	0.177657	0.177273	0.0274485	0.0228132	0.0109625	0.0120249	0.541923	0.527247	0.3283	0.321514	381.4	0.017023	0.013902	0.148666	0.143814	0.067777	0.064202	0.227825	0.226033	567.01	0.04923	0.048507	0.078622
477.74	0.015025	0.0037305	0.045495	0.0171301	0.0029484	0.00010095	0.00693044	0.00073891	0.00119325	0.00016062	0.00710506	0.00160703	0.0262378	0.00892269	961.6	0.0458743	0.0326318	0.30761	0.252539	0.127707	0.0849016	0.0195479	0.0107296	465.2	0.0746497	0.0709751	0.177288	0.177238	0.0268984	0.0228087	0.0110388	0.0120225	0.541784	0.527142	0.327869	0.32145	381.6	0.016733	0.013919	0.149371	0.143928	0.067844	0.064274	0.228195	0.226085	567.21	0.049175	0.048517	0.078023
477.94	0.0149862	0.00360154	0.0448244	0.016538	0.00300278	9.746e-05	0.0068382	0.00071336	0.00118611	0.00015507	0.00683294	0.00155148	0.025976	0.00861425	961.8	0.0460725	0.0326769	0.308205	0.252862	0.127542	0.0850167	0.0190208	0.0107445	465.4	0.0745518	0.0709609	0.176946	0.177202	0.026743	0.0228041	0.0113138	0.0120201	0.54194	0.527037	0.327902	0.321386	381.8	0.016413	0.013937	0.14939	0.144042	0.068287	0.064347	0.228648	0.226137	567.41	0.049238	0.048526	0.078182
478.14	0.014579	0.00347704	0.0439776	0.0159663	0.00254689	9.41e-05	0.00655054	0.0006887	0.00075438	0.00014971	0.00641044	0.00149785	0.0253223	0.00831648	962	0.0458821	0.032722	0.30839	0.253185	0.127705	0.0851318	0.0190448	0.0107594	465.6	0.0744165	0.0709468	0.177475	0.177167	0.0267894	0.0227996	0.0119214	0.0120177	0.541662	0.526932	0.327843	0.321322	382	0.015996	0.013955	0.149457	0.144156	0.068329	0.064419	0.228705	0.226189	567.61	0.04996	0.048536	0.07866
478.34	0.0142142	0.00335685	0.0431995	0.0154144	0.00221319	9.084e-05	0.00610827	0.0006649	0.00084672	0.00014454	0.00623358	0.00144607	0.0253074	0.00802899	962.2	0.0461684	0.0327671	0.308947	0.253507	0.127879	0.0852469	0.0194847	0.0107744	465.8	0.0742724	0.0709327	0.177599	0.177132	0.0265384	0.0227951	0.0117257	0.0120153	0.541861	0.526827	0.327645	0.321258	382.2	0.015671	0.013972	0.149275	0.14427	0.068126	0.064492	0.228876	0.226241	567.81	0.0499	0.048545	0.078553
478.54	0.0136788	0.00324081	0.0425468	0.0148815	0.00194556	8.77e-05	0.00552472	0.00064191	0.00140377	0.00013954	0.00647503	0.00139608	0.0246798	0.00775145	962.4	0.0455769	0.0328122	0.308934	0.25383	0.127633	0.0853619	0.0193481	0.0107893	466	0.074353	0.0709185	0.178245	0.177096	0.0268888	0.0227905	0.0117852	0.0120129	0.542589	0.526722	0.32804	0.321194	382.4	0.014663	0.01399	0.14884	0.144384	0.067326	0.064564	0.228027	0.226292	568.01	0.049869	0.048555	0.078356
478.74	0.0128818	0.00312878	0.0419828	0.0143671	0.00188036	8.467e-05	0.00515541	0.00061972	0.00103647	0.00013472	0.00630778	0.00134782	0.0236628	0.00748349	962.6	0.0456265	0.0328573	0.309244	0.254152	0.127388	0.085477	0.0193813	0.0108042	466.2	0.0748734	0.0709044	0.178424	0.177061	0.0271164	0.022786	0.0120212	0.0120106	0.542461	0.526617	0.327885	0.32113	382.6	0.014767	0.014007	0.148661	0.144497	0.067784	0.064637	0.228274	0.226344	568.21	0.049846	0.048564	0.07822
478.94	0.0129291	0.00302062	0.0420341	0.0138705	0.00211935	8.174e-05	0.005324	0.0005983	0.00117577	0.00013006	0.00658669	0.00130123	0.0236359	0.0072248	962.8	0.0454281	0.0329024	0.308939	0.254475	0.127081	0.085592	0.0190088	0.0108191	466.4	0.0750121	0.0708903	0.178835	0.177026	0.027614	0.0227814	0.0117725	0.0120082	0.542445	0.526512	0.32841	0.321066	382.8	0.014398	0.014025	0.148385	0.14461	0.06777	0.064709	0.227831	0.226395	568.41	0.050533	0.048574	0.078658
479.14	0.0131623	0.00291621	0.0418871	0.013391	0.00261187	7.892e-05	0.00563264	0.00057762	0.00131468	0.00012556	0.00646622	0.00125625	0.0234078	0.00697506	963	0.0460011	0.0329475	0.309906	0.254797	0.127439	0.085707	0.0194482	0.010834	466.6	0.0752991	0.0708762	0.17913	0.176991	0.0284024	0.0227769	0.0123998	0.0120058	0.542582	0.526408	0.328418	0.321002	383	0.01447	0.014042	0.147895	0.144724	0.067508	0.064781	0.227948	0.226446	568.61	0.05071	0.048583	0.078886
479.34	0.0130745	0.0028154	0.0414451	0.0129281	0.003059	7.619e-05	0.00559357	0.00055765	0.00113938	0.00012122	0.00606893	0.00121282	0.023035	0.00673394	963.2	0.0459628	0.0329926	0.31029	0.255119	0.127423	0.085822	0.0198879	0.010849	466.8	0.0757791	0.0708621	0.179929	0.176955	0.0286184	0.0227724	0.0122941	0.0120034	0.543422	0.526303	0.328668	0.320939	383.2	0.014682	0.01406	0.147867	0.144837	0.067622	0.064853	0.22826	0.226496	568.81	0.050633	0.048592	0.078848
479.54	0.0131421	0.00271808	0.0413478	0.0124812	0.00332963	7.356e-05	0.00550087	0.00053837	0.00100725	0.00011703	0.00650147	0.0011709	0.0229452	0.00650116	963.4	0.0463846	0.0330377	0.311069	0.255441	0.12821	0.085937	0.0204866	0.0108639	467	0.0760178	0.070848	0.180742	0.17692	0.029366	0.0227678	0.0127092	0.012001	0.543734	0.526198	0.328561	0.320875	383.4	0.014807	0.014077	0.148465	0.144949	0.067893	0.064926	0.228663	0.226547	569.01	0.050669	0.048601	0.078614
479.74	0.0131967	0.00262412	0.0414289	0.0120497	0.00338061	7.101e-05	0.00558623	0.00051976	0.00119083	0.00011299	0.00743798	0.00113042	0.0232177	0.00627643	963.6	0.0468947	0.0330828	0.31111	0.255763	0.128325	0.086052	0.0202714	0.0108788	467.2	0.0765044	0.0708339	0.181007	0.176885	0.029515	0.0227633	0.0132093	0.0119986	0.543903	0.526093	0.328835	0.320811	383.6	0.014803	0.014095	0.147965	0.145062	0.067418	0.064998	0.228332	0.226597	569.21	0.050813	0.048611	0.078727
479.94	0.0128127	0.00253341	0.0409401	0.0116332	0.00229234	6.856e-05	0.00517782	0.0005018	0.00038141	0.00010908	0.00767773	0.00109135	0.0228304	0.00605947	963.8	0.0471717	0.0331279	0.311559	0.256085	0.128588	0.086167	0.0208447	0.0108937	467.4	0.0770502	0.0708198	0.181045	0.17685	0.0297807	0.0227588	0.0134061	0.0119962	0.543702	0.525988	0.328746	0.320747	383.8	0.01499	0.014112	0.148177	0.145175	0.067541	0.06507	0.228588	0.226647	569.41	0.05081	0.04862	0.078579
480.14	0.0127393	0.00244583	0.0406427	0.0112311	0.00234611	6.619e-05	0.00570151	0.00048445	0.00045872	0.00010531	0.00832775	0.00105362	0.0231058	0.00585	964	0.0466867	0.033173	0.311278	0.256407	0.128134	0.0862819	0.0205453	0.0109086	467.6	0.0775378	0.0708056	0.181648	0.176814	0.0305018	0.0227542	0.0141063	0.0119938	0.544053	0.525884	0.329097	0.320683	384	0.015424	0.01413	0.148271	0.145287	0.068147	0.065142	0.228765	0.226697	569.61	0.050604	0.048629	0.078731
480.34	0.013117	0.00236129	0.0406032	0.0108428	0.00189661	6.39e-05	0.0059457	0.0004677	0.00036212	0.00010167	0.00862048	0.0010172	0.023042	0.00564778	964.2	0.0462171	0.033218	0.310943	0.256729	0.128106	0.0863969	0.0201925	0.0109236	467.8	0.0774858	0.0707915	0.181543	0.176779	0.0300275	0.0227497	0.0138368	0.0119914	0.54354	0.525779	0.328794	0.320619	384.2	0.01627	0.014147	0.148769	0.145399	0.068765	0.065214	0.229835	0.226746	569.81	0.050641	0.048638	0.079086
480.54	0.0131436	0.00227966	0.0403902	0.010468	0.00202558	6.169e-05	0.00568693	0.00045154	0.00040663	9.816e-05	0.00824228	0.00098204	0.0229261	0.00545255	964.4	0.0459506	0.0332631	0.311272	0.25705	0.128858	0.0865118	0.0201533	0.0109385	468	0.076988	0.0707775	0.18085	0.176744	0.0301486	0.0227452	0.0134794	0.011989	0.543004	0.525674	0.328316	0.320555	384.4	0.016771	0.014165	0.148587	0.145511	0.069316	0.065286	0.230351	0.226796	570.01	0.050698	0.048647	0.078743
480.74	0.0125781	0.00220086	0.0399915	0.0101061	0.00185261	5.956e-05	0.00523297	0.00043593	0.00023518	9.476e-05	0.00736383	0.00094809	0.0222787	0.00526406	964.6	0.0459044	0.0333082	0.311038	0.257372	0.129477	0.0866267	0.0200537	0.0109534	468.2	0.0770741	0.0707634	0.18019	0.176709	0.0298416	0.0227406	0.0133148	0.0119866	0.542885	0.52557	0.328208	0.320491	384.6	0.016707	0.014182	0.14925	0.145623	0.069294	0.065358	0.230583	0.226845	570.21	0.050089	0.048656	0.079164
480.94	0.0122826	0.00212478	0.0400698	0.0097568	0.00171812	5.75e-05	0.0052723	0.00042086	0.00047138	9.149e-05	0.00683015	0.00091532	0.0220445	0.00508209	964.8	0.0461899	0.0333533	0.311164	0.257694	0.130099	0.0867416	0.0200417	0.0109683	468.4	0.0769712	0.0707493	0.179829	0.176674	0.0300025	0.0227361	0.0128649	0.0119843	0.541865	0.525465	0.327669	0.320428	384.8	0.016529	0.0142	0.149271	0.145734	0.06899	0.06543	0.230613	0.226894	570.41	0.050178	0.048665	0.079094
481.14	0.0122864	0.00205133	0.0400264	0.00941953	0.0017155	5.551e-05	0.00537196	0.00040631	0.00063386	8.832e-05	0.00665649	0.00088367	0.0221463	0.00490642	965	0.0462149	0.0333983	0.311208	0.258015	0.130487	0.0868565	0.0204846	0.0109832	468.6	0.0770888	0.0707352	0.179128	0.176638	0.0302395	0.0227316	0.0126661	0.0119819	0.541159	0.52536	0.327992	0.320364	385	0.016321	0.014217	0.14918	0.145846	0.06901	0.065502	0.230909	0.226943	570.61	0.049534	0.048674	0.079005
481.34	0.0124354	0.00198042	0.0401736	0.00909391	0.00208796	5.359e-05	0.00575512	0.00039227	0.00088486	8.527e-05	0.00707364	0.00085313	0.0225531	0.00473681	965.2	0.0463534	0.0334434	0.311208	0.258336	0.130604	0.0869714	0.0200485	0.0109981	468.8	0.0766967	0.0707211	0.178112	0.176603	0.0297242	0.0227271	0.0120683	0.0119795	0.540612	0.525256	0.327655	0.3203	385.2	0.015932	0.014235	0.149308	0.145957	0.069142	0.065574	0.231199	0.226991	570.81	0.049266	0.048683	0.079108
481.54	0.0128474	0.00191196	0.0404834	0.00877955	0.00257414	5.174e-05	0.00622695	0.00037871	0.00136768	8.232e-05	0.00779573	0.00082364	0.0230933	0.00457307	965.4	0.0471444	0.0334885	0.312154	0.258657	0.131372	0.0870862	0.0205291	0.011013	469	0.0770231	0.070707	0.17736	0.176568	0.0293197	0.0227225	0.0120342	0.0119771	0.539825	0.525151	0.327336	0.320236	385.4	0.016023	0.014252	0.150158	0.146068	0.069541	0.065645	0.231646	0.22704	571.01	0.048719	0.048692	0.079143
481.74	0.0133861	0.00184587	0.0403539	0.00847606	0.00269904	4.995e-05	0.00656927	0.00036561	0.00163358	7.948e-05	0.0081609	0.00079517	0.0234629	0.00441499	965.6	0.0475455	0.0335335	0.312842	0.258979	0.131612	0.0872011	0.0208062	0.011028	469.2	0.076659	0.0706929	0.177172	0.176533	0.0284457	0.022718	0.011821	0.0119747	0.539853	0.525046	0.327046	0.320172	385.6	0.016235	0.014269	0.150526	0.146179	0.069989	0.065717	0.23193	0.227088	571.21	0.047485	0.048701	0.07845
481.94	0.0136764	0.00178206	0.0404187	0.00818306	0.00285014	4.823e-05	0.00665127	0.00035298	0.00169153	7.673e-05	0.00814843	0.00076768	0.0232462	0.00426237	965.8	0.0475337	0.0335786	0.313112	0.2593	0.13172	0.0873159	0.0206681	0.0110429	469.4	0.0765367	0.0706788	0.17715	0.176498	0.028357	0.0227135	0.0120701	0.0119723	0.539257	0.524942	0.32654	0.320109	385.8	0.016407	0.014287	0.150421	0.14629	0.070068	0.065789	0.231843	0.227136	571.41	0.047602	0.048709	0.078275
482.14	0.0134196	0.00172046	0.0399735	0.00790019	0.00275879	4.656e-05	0.00631747	0.00034077	0.00172868	7.408e-05	0.00779373	0.00074114	0.0230556	0.00411503	966	0.0477337	0.0336236	0.313452	0.259621	0.131844	0.0874307	0.0207352	0.0110578	469.6	0.0764945	0.0706648	0.177445	0.176463	0.0277737	0.022709	0.0119665	0.01197	0.538871	0.524837	0.326433	0.320045	386	0.016636	0.014304	0.150589	0.146401	0.069739	0.065861	0.23145	0.227184	571.61	0.04764	0.048718	0.078186
482.34	0.0134458	0.00166098	0.0395344	0.00762709	0.00283347	4.495e-05	0.00609612	0.00032899	0.00225863	7.152e-05	0.00763806	0.00071552	0.0228294	0.00397278	966.2	0.0477395	0.0336687	0.314213	0.259941	0.131912	0.0875455	0.0209446	0.0110727	469.8	0.0761288	0.0706507	0.177254	0.176428	0.026916	0.0227044	0.010723	0.0119676	0.538297	0.524733	0.325584	0.319981	386.2	0.016447	0.014322	0.15065	0.146511	0.069636	0.065932	0.231485	0.227231	571.81	0.04714	0.048727	0.077947
482.54	0.0132121	0.00160357	0.0389262	0.00736344	0.00296118	4.34e-05	0.00602506	0.00031762	0.00239225	6.905e-05	0.00789678	0.00069079	0.0221527	0.00383545	966.4	0.0474198	0.0337138	0.315003	0.260262	0.131653	0.0876603	0.0204428	0.0110876	470	0.0758986	0.0706366	0.177259	0.176392	0.0263268	0.0226999	0.0106678	0.0119652	0.537927	0.524628	0.324803	0.319917	386.4	0.016374	0.014339	0.150992	0.146622	0.069592	0.066004	0.231194	0.227279	572.01	0.047135	0.048736	0.078305
482.74	0.0134565	0.00154813	0.038591	0.0071089	0.00332331	4.19e-05	0.00608733	0.00030664	0.0025192	6.666e-05	0.00856352	0.00066691	0.0221473	0.00370286	966.6	0.047874	0.0337588	0.315476	0.260583	0.131235	0.0877751	0.0203288	0.0111025	470.2	0.0756842	0.0706226	0.177332	0.176357	0.0264334	0.0226954	0.0105703	0.0119628	0.537182	0.524524	0.324078	0.319854	386.6	0.01689	0.014357	0.151009	0.146732	0.06982	0.066075	0.231819	0.227326	572.21	0.047338	0.048744	0.078995
482.94	0.0141871	0.00149462	0.0384851	0.00686316	0.00394905	4.045e-05	0.00640406	0.00029604	0.00270403	6.435e-05	0.0093923	0.00064385	0.0225869	0.00357486	966.8	0.0480272	0.0338039	0.316164	0.260903	0.131539	0.0878899	0.0201588	0.0111174	470.4	0.0757891	0.0706085	0.178006	0.176322	0.0269238	0.0226909	0.010603	0.0119604	0.537343	0.524419	0.324288	0.31979	386.8	0.016862	0.014374	0.151476	0.146842	0.069617	0.066147	0.231797	0.227373	572.41	0.047675	0.048753	0.079927
483.14	0.0143521	0.00144295	0.037985	0.00662591	0.00396639	3.905e-05	0.00613469	0.00028581	0.00245901	6.213e-05	0.0097142	0.0006216	0.0224192	0.00345129	967	0.0481704	0.0338489	0.31747	0.261224	0.131816	0.0880046	0.0207235	0.0111323	470.6	0.0760142	0.0705944	0.178222	0.176287	0.0273934	0.0226864	0.0109842	0.011958	0.537871	0.524315	0.324157	0.319726	387	0.017159	0.014391	0.151694	0.146952	0.069599	0.066218	0.232213	0.22742	572.61	0.047805	0.048761	0.080114
483.34	0.0142248	0.00139307	0.0376161	0.00639687	0.00352585	3.77e-05	0.00546781	0.00027593	0.00214467	5.998e-05	0.00995513	0.00060011	0.0219493	0.00333198	967.2	0.0480249	0.0338939	0.3179	0.261544	0.131767	0.0881194	0.0205929	0.0111472	470.8	0.0761075	0.0705804	0.17877	0.176252	0.0278265	0.0226818	0.0110729	0.0119557	0.538384	0.524211	0.324122	0.319663	387.2	0.017173	0.014409	0.152298	0.147061	0.069805	0.06629	0.232359	0.227466	572.81	0.048187	0.04877	0.079796
483.54	0.0143144	0.00134492	0.0378655	0.00617574	0.00330163	3.64e-05	0.00536489	0.00026639	0.00219912	5.791e-05	0.0106651	0.00057937	0.0220897	0.0032168	967.4	0.048466	0.033939	0.318887	0.261865	0.132372	0.0882341	0.0207696	0.0111621	471	0.0763267	0.0705663	0.179615	0.176217	0.0285565	0.0226773	0.0116505	0.0119533	0.538106	0.524106	0.324283	0.319599	387.4	0.017014	0.014426	0.151983	0.147171	0.069358	0.066361	0.232121	0.227513	573.01	0.048488	0.048778	0.080378
483.74	0.0135845	0.00129842	0.037376	0.00596226	0.0024556	3.514e-05	0.0049271	0.00025718	0.00175354	5.591e-05	0.0108493	0.00055934	0.0217096	0.0031056	967.6	0.0486765	0.033984	0.31948	0.262185	0.13241	0.0883488	0.0206401	0.0111771	471.2	0.076845	0.0705523	0.179803	0.176182	0.0286372	0.0226728	0.0120704	0.0119509	0.538548	0.524002	0.32445	0.319535	387.6	0.016929	0.014444	0.151889	0.14728	0.068866	0.066432	0.23209	0.227559	573.21	0.048486	0.048787	0.080542
483.94	0.0135233	0.00125354	0.0369645	0.00575615	0.00195376	3.392e-05	0.00455118	0.00024829	0.00172561	5.397e-05	0.0109509	0.00054	0.0212856	0.00299825	967.8	0.0484711	0.034029	0.319422	0.262505	0.132189	0.0884635	0.020684	0.011192	471.4	0.0762821	0.0705382	0.179495	0.176147	0.0282963	0.0226683	0.0116687	0.0119485	0.537613	0.523897	0.323658	0.319472	387.8	0.017121	0.014461	0.152096	0.147389	0.069694	0.066503	0.232504	0.227605	573.41	0.048931	0.048795	0.080548
484.14	0.0135732	0.00121021	0.0369236	0.00555718	0.00260309	3.275e-05	0.00491572	0.00023971	0.00250537	5.211e-05	0.0112001	0.00052134	0.021405	0.00289461	968	0.04819	0.0340741	0.319396	0.262825	0.132098	0.0885782	0.0204577	0.0112069	471.6	0.0759088	0.0705242	0.179302	0.176112	0.0280811	0.0226638	0.011627	0.0119461	0.537426	0.523793	0.32359	0.319408	388	0.017472	0.014478	0.152594	0.147498	0.070811	0.066575	0.232975	0.227651	573.61	0.049073	0.048803	0.080919
484.34	0.0136472	0.00116837	0.0370521	0.00536507	0.00274547	3.162e-05	0.00487012	0.00023142	0.00281817	5.031e-05	0.0110685	0.00050331	0.0211973	0.00279454	968.2	0.0478558	0.0341191	0.319285	0.263145	0.132286	0.0886929	0.0201141	0.0112218	471.8	0.0753643	0.0705101	0.179015	0.176076	0.028057	0.0226593	0.0112309	0.0119438	0.537081	0.523689	0.323739	0.319345	388.2	0.01741	0.014496	0.152799	0.147607	0.071198	0.066646	0.233624	0.227697	573.81	0.047735	0.048812	0.081141
484.54	0.0137441	0.00112799	0.036914	0.00517961	0.00340641	3.053e-05	0.00479655	0.00022342	0.00299715	4.857e-05	0.0106313	0.00048592	0.0209345	0.00269794	968.4	0.0474634	0.0341641	0.319189	0.263465	0.132555	0.0888075	0.0199696	0.0112367	472	0.0752877	0.0704961	0.178582	0.176041	0.0281976	0.0226548	0.0110508	0.0119414	0.537539	0.523584	0.324055	0.319281	388.4	0.016816	0.014513	0.152879	0.147716	0.071618	0.066717	0.233699	0.227742	574.01	0.048414	0.04882	0.080945
484.74	0.0133411	0.00108899	0.0367426	0.00500057	0.00338907	2.947e-05	0.0047526	0.0002157	0.00285163	4.689e-05	0.00947083	0.00046912	0.0205337	0.00260468	968.6	0.0471952	0.0342091	0.319025	0.263785	0.132852	0.0889222	0.0199119	0.0112516	472.2	0.0750535	0.070482	0.178282	0.176006	0.0280237	0.0226502	0.011286	0.011939	0.538093	0.52348	0.324421	0.319217	388.6	0.015939	0.014531	0.153139	0.147824	0.071582	0.066788	0.233865	0.227787	574.21	0.048682	0.048828	0.080177
484.94	0.0131908	0.00105135	0.0364014	0.00482771	0.00319878	2.845e-05	0.0049977	0.00020824	0.00308557	4.527e-05	0.00873604	0.0004529	0.020394	0.00251464	968.8	0.0472547	0.0342542	0.318979	0.264104	0.132864	0.0890368	0.0202359	0.0112665	472.4	0.0745704	0.070468	0.177998	0.175971	0.0283857	0.0226457	0.0111315	0.0119366	0.538206	0.523376	0.324753	0.319154	388.8	0.015673	0.014548	0.153085	0.147933	0.071408	0.066859	0.233984	0.227832	574.41	0.049589	0.048836	0.079319
485.14	0.0134796	0.00101501	0.0361716	0.00466082	0.00334566	2.747e-05	0.00525597	0.00020104	0.00391707	4.37e-05	0.00866731	0.00043725	0.0207272	0.00242771	969	0.0469813	0.0342992	0.318805	0.264424	0.133207	0.0891514	0.0203854	0.0112814	472.6	0.0745383	0.070454	0.177527	0.175936	0.0284649	0.0226412	0.0113015	0.0119343	0.538632	0.523272	0.325154	0.31909	389	0.015226	0.014565	0.153247	0.148041	0.071535	0.06693	0.234133	0.227877	574.61	0.050384	0.048845	0.079235
485.34	0.013727	0.00097992	0.0361382	0.00449971	0.00329764	2.652e-05	0.00525596	0.00019409	0.00456299	4.219e-05	0.00845307	0.00042213	0.0211584	0.00234379	969.2	0.0469976	0.0343442	0.319031	0.264744	0.133459	0.0892661	0.0202307	0.0112963	472.8	0.0741123	0.0704399	0.177066	0.175901	0.0284067	0.0226367	0.0117696	0.0119319	0.538553	0.523168	0.325291	0.319027	389.2	0.015242	0.014583	0.153592	0.148149	0.071918	0.067001	0.233741	0.227922	574.81	0.050707	0.048853	0.079051
485.54	0.0140256	0.00094604	0.0360363	0.00434416	0.00274964	2.56e-05	0.00539262	0.00018738	0.00481117	4.073e-05	0.00816855	0.00040754	0.0214197	0.00226277	969.4	0.046885	0.0343892	0.319645	0.265063	0.133875	0.0893807	0.0205684	0.0113112	473	0.0740123	0.0704259	0.176912	0.175866	0.0279403	0.0226322	0.0120625	0.0119295	0.537961	0.523063	0.324911	0.318963	389.4	0.015866	0.0146	0.153812	0.148257	0.071842	0.067072	0.233377	0.227966	575.01	0.050789	0.048861	0.078639
485.74	0.0140205	0.00091334	0.03576	0.00419399	0.00259269	2.472e-05	0.00550086	0.00018091	0.00506225	3.933e-05	0.00758104	0.00039345	0.0218517	0.00218455	969.6	0.0469468	0.0344342	0.319871	0.265382	0.133927	0.0894952	0.0206965	0.0113261	473.2	0.0739544	0.0704119	0.177112	0.175831	0.0276251	0.0226277	0.0118068	0.0119271	0.537918	0.522959	0.324608	0.3189	389.6	0.015448	0.014617	0.1534	0.148364	0.07148	0.067143	0.233115	0.228011	575.21	0.051	0.048869	0.078134
485.94	0.0138124	0.00088177	0.0353267	0.00404901	0.00246628	2.386e-05	0.00528569	0.00017465	0.00475509	3.797e-05	0.00707795	0.00037985	0.0215666	0.00210904	969.8	0.0464186	0.0344792	0.319584	0.265702	0.133698	0.0896098	0.020247	0.011341	473.4	0.0735656	0.0703979	0.176417	0.175796	0.0271034	0.0226232	0.0111525	0.0119247	0.53691	0.522855	0.323859	0.318836	389.8	0.015335	0.014635	0.153474	0.148472	0.071144	0.067214	0.233301	0.228055	575.41	0.051504	0.048877	0.077906
486.14	0.0135581	0.00085129	0.0347004	0.00390905	0.0026197	2.304e-05	0.00522776	0.00016862	0.00477772	3.665e-05	0.00736823	0.00036672	0.021614	0.00203613	970	0.0468244	0.0345242	0.319909	0.266021	0.133978	0.0897244	0.0201965	0.0113559	473.6	0.0733845	0.0703838	0.176335	0.175761	0.0262182	0.0226187	0.0108013	0.0119224	0.536085	0.522751	0.323523	0.318773	390	0.015748	0.014652	0.154256	0.148579	0.070827	0.067284	0.233504	0.228099	575.61	0.051344	0.048885	0.077872
486.34	0.0137043	0.00082186	0.0343826	0.00377392	0.00268039	2.224e-05	0.00567838	0.00016279	0.00479105	3.539e-05	0.00767917	0.00035404	0.021715	0.00196575	970.2	0.0468757	0.0345692	0.320302	0.26634	0.133974	0.0898389	0.0201417	0.0113708	473.8	0.0728543	0.0703698	0.17609	0.175726	0.0256428	0.0226142	0.0101917	0.01192	0.534895	0.522647	0.322397	0.318709	390.2	0.015953	0.014669	0.154993	0.148687	0.070923	0.067355	0.233989	0.228143	575.81	0.051211	0.048893	0.077387
486.54	0.0137564	0.00079345	0.0341332	0.00364346	0.0027159	2.147e-05	0.00609377	0.00015716	0.00461348	3.416e-05	0.00828582	0.0003418	0.0219927	0.0018978	970.4	0.0469273	0.0346142	0.320715	0.266659	0.133844	0.0899534	0.0199114	0.0113857	474	0.0725918	0.0703558	0.175555	0.175691	0.0253147	0.0226097	0.0101093	0.0119176	0.534214	0.522543	0.321794	0.318646	390.4	0.016421	0.014687	0.155326	0.148794	0.071016	0.067426	0.234332	0.228186	576.01	0.051425	0.048901	0.077198
486.74	0.0139863	0.00076602	0.0340161	0.00351751	0.002874	2.073e-05	0.00635038	0.00015173	0.00420983	3.298e-05	0.00901775	0.00032999	0.0222399	0.00183219	970.6	0.0470997	0.0346592	0.320761	0.266978	0.13376	0.090068	0.0200878	0.0114006	474.2	0.0732929	0.0703418	0.175824	0.175656	0.0261518	0.0226052	0.0101229	0.0119153	0.534055	0.522439	0.321686	0.318582	390.6	0.016699	0.014704	0.155399	0.148901	0.071129	0.067496	0.234474	0.22823	576.21	0.050545	0.048909	0.076467
486.94	0.013793	0.00073954	0.0336261	0.00339592	0.00257852	2.001e-05	0.00629866	0.00014648	0.00349145	3.184e-05	0.00929525	0.00031858	0.0220557	0.00176886	970.8	0.0474797	0.0347042	0.321538	0.267297	0.134358	0.0901825	0.0200508	0.0114155	474.4	0.073938	0.0703278	0.176196	0.175621	0.0264015	0.0226007	0.010164	0.0119129	0.533838	0.522335	0.321832	0.318519	390.8	0.016675	0.014721	0.155153	0.149007	0.070807	0.067567	0.23439	0.228273	576.41	0.05036	0.048917	0.075996
487.14	0.0131614	0.00071398	0.0330105	0.00327853	0.00193818	1.932e-05	0.00580029	0.00014142	0.00277193	3.074e-05	0.00909353	0.00030757	0.0214823	0.00170771	971	0.0473661	0.0347492	0.321876	0.267615	0.134175	0.090297	0.0199123	0.0114304	474.6	0.0739218	0.0703138	0.176283	0.175586	0.0265574	0.0225962	0.010074	0.0119105	0.533331	0.522231	0.321437	0.318455	391	0.017048	0.014739	0.155397	0.149114	0.071195	0.067638	0.234792	0.228316	576.61	0.050713	0.048924	0.075416
487.34	0.0126906	0.0006893	0.0328522	0.0031652	0.00166112	1.865e-05	0.00580996	0.00013653	0.00239126	2.968e-05	0.00869692	0.00029694	0.0211364	0.00164868	971.2	0.0474193	0.0347942	0.322146	0.267934	0.13385	0.0904114	0.0194102	0.0114453	474.8	0.0741322	0.0702998	0.17641	0.175551	0.0266643	0.0225917	0.0101517	0.0119081	0.532714	0.522127	0.321363	0.318392	391.2	0.016909	0.014756	0.15489	0.14922	0.071483	0.067708	0.234855	0.228359	576.81	0.05034	0.048932	0.075381
487.54	0.012348	0.00066547	0.0328976	0.00305578	0.00181169	1.801e-05	0.00637003	0.00013181	0.00213492	2.865e-05	0.00893556	0.00028667	0.0210706	0.00159169	971.4	0.0476531	0.0348391	0.322951	0.268253	0.134043	0.0905259	0.019434	0.0114602	475	0.0746283	0.0702858	0.176835	0.175516	0.026741	0.0225872	0.010123	0.0119058	0.53247	0.522023	0.321559	0.318329	391.4	0.017077	0.014773	0.154493	0.149327	0.070941	0.067779	0.234434	0.228402	577.01	0.049759	0.04894	0.075592
487.74	0.0116981	0.00064247	0.032576	0.00295015	0.0018528	1.739e-05	0.00654373	0.00012725	0.00193299	2.766e-05	0.0098204	0.00027676	0.0205144	0.00153667	971.6	0.0480103	0.0348841	0.32359	0.268571	0.133906	0.0906403	0.0195322	0.0114751	475.2	0.0745115	0.0702718	0.176248	0.175481	0.0265915	0.0225827	0.00979961	0.0119034	0.531978	0.521919	0.321193	0.318265	391.6	0.016912	0.01479	0.154521	0.149433	0.071184	0.067849	0.234499	0.228444	577.21	0.048652	0.048948	0.075088
487.94	0.0117853	0.00062026	0.0325513	0.00284817	0.00279498	1.679e-05	0.00671067	0.00012286	0.00214138	2.671e-05	0.0107621	0.0002672	0.0203777	0.00148355	971.8	0.0483817	0.0349291	0.323979	0.268889	0.133842	0.0907548	0.0195337	0.01149	475.4	0.0744303	0.0702578	0.176337	0.175446	0.0266866	0.0225782	0.0100763	0.011901	0.531135	0.521815	0.321191	0.318202	391.8	0.017118	0.014808	0.154407	0.149539	0.071505	0.067919	0.234509	0.228487	577.41	0.048012	0.048955	0.07574
488.14	0.011488	0.00059882	0.0324411	0.00274971	0.0032645	1.621e-05	0.00639809	0.00011861	0.00157519	2.578e-05	0.0110944	0.00025796	0.0201166	0.00143226	972	0.0488972	0.0349741	0.324756	0.269208	0.134023	0.0908692	0.0192988	0.0115049	475.6	0.0750984	0.0702438	0.176544	0.175411	0.0272045	0.0225737	0.0104269	0.0118987	0.531819	0.521711	0.321369	0.318138	392	0.01716	0.014825	0.153839	0.149644	0.071405	0.06799	0.234551	0.228529	577.61	0.047229	0.048963	0.076125
488.34	0.0113554	0.00057812	0.0324301	0.00265466	0.00352248	1.564e-05	0.0063083	0.00011451	0.00098761	2.489e-05	0.0112728	0.00024904	0.0199656	0.00138275	972.2	0.0485441	0.0350191	0.325113	0.269526	0.133804	0.0909836	0.0192145	0.0115197	475.8	0.0755968	0.0702298	0.177305	0.175377	0.0277912	0.0225692	0.0111868	0.0118963	0.532157	0.521607	0.322526	0.318075	392.2	0.016875	0.014842	0.153924	0.14975	0.070994	0.06806	0.234669	0.228571	577.81	0.046913	0.048971	0.076502
488.54	0.0113031	0.00055813	0.0322416	0.00256289	0.00339698	1.51e-05	0.00619384	0.00011055	0.00057348	2.403e-05	0.0108531	0.00024043	0.0196139	0.00133495	972.4	0.0482768	0.035064	0.32528	0.269844	0.133693	0.091098	0.0191128	0.0115346	476	0.0758902	0.0702158	0.177763	0.175342	0.0279707	0.0225647	0.0119259	0.0118939	0.532889	0.521503	0.323103	0.318012	392.4	0.016595	0.014859	0.153811	0.149855	0.070751	0.06813	0.234601	0.228613	578.01	0.048524	0.048978	0.076579
488.74	0.0111523	0.00053884	0.0320912	0.0024743	0.00322343	1.458e-05	0.00592373	0.00010673	0.00050471	2.32e-05	0.0101406	0.00023212	0.0193182	0.00128881	972.6	0.0484968	0.035109	0.325626	0.270162	0.134109	0.0912124	0.0198278	0.0115495	476.2	0.0759981	0.0702018	0.177915	0.175307	0.0280964	0.0225602	0.0126455	0.0118915	0.532931	0.521399	0.323673	0.317948	392.6	0.016374	0.014877	0.154086	0.149961	0.070407	0.068201	0.234989	0.228654	578.21	0.048721	0.048986	0.076078
488.94	0.0111986	0.00052021	0.0320196	0.00238877	0.00339153	1.408e-05	0.00572034	0.00010304	0.00074069	2.24e-05	0.00957467	0.0002241	0.0191724	0.00124425	972.8	0.0486181	0.035154	0.325829	0.27048	0.134426	0.0913268	0.0205128	0.0115644	476.4	0.0758251	0.0701879	0.178339	0.175272	0.0287198	0.0225557	0.0132566	0.0118892	0.533379	0.521295	0.324039	0.317885	392.8	0.015792	0.014894	0.153678	0.150066	0.06959	0.068271	0.234431	0.228696	578.41	0.04892	0.048993	0.076412
489.14	0.0111523	0.00050223	0.0317175	0.00230619	0.00321937	1.359e-05	0.00549467	9.948e-05	0.00080576	2.162e-05	0.00872933	0.00021635	0.0189502	0.00120124	973	0.0490032	0.0351989	0.326321	0.270798	0.134891	0.0914411	0.0200867	0.0115793	476.6	0.076041	0.0701739	0.17842	0.175237	0.0293442	0.0225512	0.013676	0.0118868	0.533352	0.521192	0.324328	0.317822	393	0.015569	0.014911	0.153574	0.150171	0.069647	0.068341	0.234418	0.228737	578.61	0.048679	0.049001	0.077031
489.34	0.0110986	0.00048487	0.0316954	0.00222647	0.00263645	1.312e-05	0.0049402	9.604e-05	-8.78e-06	2.088e-05	0.00758091	0.00020887	0.0186004	0.00115972	973.2	0.0494233	0.0352439	0.326873	0.271116	0.135347	0.0915555	0.0202861	0.0115942	476.8	0.0757517	0.0701599	0.178259	0.175202	0.0293166	0.0225467	0.0139795	0.0118844	0.533424	0.521088	0.324011	0.317758	393.2	0.015608	0.014928	0.153866	0.150276	0.069852	0.068411	0.234604	0.228778	578.81	0.048269	0.049008	0.077012
489.54	0.0109239	0.00046811	0.0319907	0.00214951	0.00275129	1.267e-05	0.00482868	9.272e-05	-0.00012306	2.016e-05	0.00694046	0.00020165	0.0186478	0.00111963	973.4	0.0498129	0.0352888	0.327614	0.271433	0.135499	0.0916698	0.0206608	0.0116091	477	0.0756344	0.0701459	0.178066	0.175167	0.0290671	0.0225422	0.01372	0.0118821	0.533264	0.520984	0.323669	0.317695	393.4	0.015487	0.014946	0.153867	0.15038	0.069647	0.068481	0.234957	0.228819	579.01	0.048047	0.049016	0.077631
489.74	0.0111118	0.00045193	0.0318587	0.0020752	0.00293578	1.223e-05	0.00440495	8.951e-05	-5.253e-05	1.946e-05	0.00670104	0.00019468	0.0185331	0.00108093	973.6	0.0503984	0.0353338	0.32817	0.271751	0.136202	0.0917841	0.0207485	0.011624	477.2	0.0751896	0.070132	0.177586	0.175132	0.0288118	0.0225377	0.0133807	0.0118797	0.532879	0.52088	0.323486	0.317632	393.6	0.015439	0.014963	0.154218	0.150485	0.06972	0.068551	0.235297	0.22886	579.21	0.048218	0.049023	0.078062
489.94	0.0115686	0.0004363	0.0318175	0.00200347	0.00290184	1.181e-05	0.00422354	8.642e-05	-9.972e-05	1.879e-05	0.00643855	0.00018795	0.0184444	0.00104356	973.8	0.0498303	0.0353787	0.327584	0.272068	0.136226	0.0918984	0.0205295	0.0116388	477.4	0.0743062	0.070118	0.176897	0.175097	0.0286109	0.0225333	0.0130594	0.0118773	0.532322	0.520776	0.322775	0.317569	393.8	0.016021	0.01498	0.15539	0.150589	0.070302	0.068621	0.235783	0.228901	579.41	0.047951	0.04903	0.078384
490.14	0.0120637	0.00042122	0.0319308	0.00193421	0.00330866	1.14e-05	0.00449674	8.343e-05	4.864e-05	1.814e-05	0.00582812	0.00018145	0.0190526	0.00100749	974	0.0502243	0.0354237	0.327872	0.272386	0.136671	0.0920127	0.0208694	0.0116537	477.6	0.0739858	0.070104	0.176838	0.175062	0.0282091	0.0225288	0.0129103	0.011875	0.532312	0.520673	0.322556	0.317505	394	0.016778	0.014997	0.156311	0.150694	0.070621	0.068691	0.236255	0.228941	579.61	0.047933	0.049038	0.078454
490.34	0.0121396	0.00040666	0.0319202	0.00186735	0.00321835	1.101e-05	0.00470407	8.055e-05	-4.213e-05	1.751e-05	0.00491252	0.00017518	0.0193998	0.00097266	974.2	0.050445	0.0354686	0.327907	0.272703	0.13695	0.092127	0.0209958	0.0116686	477.8	0.0737364	0.0700901	0.175979	0.175028	0.0279679	0.0225243	0.012612	0.0118726	0.532039	0.520569	0.322199	0.317442	394.2	0.016883	0.015015	0.156758	0.150798	0.071225	0.068761	0.236717	0.228981	579.81	0.04811	0.049045	0.078095
490.54	0.0121522	0.0003926	0.0317771	0.0018028	0.00298929	1.062e-05	0.00443387	7.776e-05	0.00013294	1.69e-05	0.00421499	0.00016913	0.0195226	0.00093904	974.4	0.0501403	0.0355136	0.327817	0.27302	0.136946	0.0922413	0.0210739	0.0116835	478	0.0736477	0.0700761	0.174979	0.174993	0.0269926	0.0225198	0.012272	0.0118702	0.531714	0.520465	0.321645	0.317379	394.4	0.016651	0.015032	0.157067	0.150902	0.071717	0.068831	0.23721	0.229021	580.01	0.047416	0.049052	0.077662
490.74	0.0121559	0.00037903	0.0314691	0.00174048	0.00285626	1.026e-05	0.00402562	7.508e-05	0.00074332	1.632e-05	0.00373652	0.00016328	0.0195895	0.00090658	974.6	0.0505896	0.0355585	0.327928	0.273337	0.137068	0.0923555	0.021263	0.0116984	478.2	0.0739935	0.0700622	0.174859	0.174958	0.0274256	0.0225153	0.0120395	0.0118679	0.532163	0.520362	0.321669	0.317316	394.6	0.01686	0.015049	0.15731	0.151005	0.072338	0.068901	0.237957	0.229061	580.21	0.047099	0.049059	0.077066
490.94	0.0119751	0.00036593	0.0311703	0.00168032	0.00267378	9.9e-06	0.00369996	7.248e-05	0.00132647	1.576e-05	0.00347816	0.00015764	0.0195727	0.00087524	974.8	0.0510524	0.0356035	0.328294	0.273655	0.137666	0.0924698	0.0214434	0.0117133	478.4	0.0734204	0.0700482	0.174599	0.174923	0.0265357	0.0225108	0.0121319	0.0118655	0.531858	0.520258	0.321108	0.317253	394.8	0.016688	0.015066	0.157393	0.151109	0.072592	0.06897	0.238384	0.229101	580.41	0.047562	0.049067	0.077317
491.14	0.0123671	0.00035328	0.0314542	0.00162223	0.00265584	9.56e-06	0.00385818	6.997e-05	0.00198187	1.521e-05	0.0037314	0.00015219	0.0197195	0.00084498	975	0.0509259	0.0356484	0.328154	0.273971	0.137565	0.092584	0.0216339	0.0117282	478.6	0.0731916	0.0700343	0.174217	0.174888	0.026083	0.0225063	0.0117448	0.0118631	0.53154	0.520155	0.320847	0.317189	395	0.016516	0.015083	0.157914	0.151212	0.073477	0.06904	0.239101	0.229141	580.61	0.047917	0.049074	0.077252
491.34	0.0124538	0.00034107	0.0316719	0.00156615	0.00277749	9.23e-06	0.00425617	6.756e-05	0.00239689	1.469e-05	0.00416128	0.00014693	0.0197748	0.00081577	975.2	0.0505599	0.0356933	0.328529	0.274288	0.137442	0.0926982	0.0217155	0.011743	478.8	0.0741489	0.0700203	0.174347	0.174853	0.0271771	0.0225019	0.0123635	0.0118608	0.532077	0.520051	0.321318	0.317126	395.2	0.016502	0.015101	0.157588	0.151316	0.073599	0.06911	0.239145	0.22918	580.81	0.047538	0.049081	0.077719
491.54	0.0125565	0.00032928	0.031715	0.00151201	0.00306157	8.91e-06	0.00436536	6.522e-05	0.00253869	1.418e-05	0.00476218	0.00014185	0.0196854	0.00078757	975.4	0.0509169	0.0357382	0.329507	0.274605	0.137867	0.0928124	0.0219429	0.0117579	479	0.0744053	0.0700064	0.174738	0.174819	0.0277212	0.0224974	0.0125807	0.0118584	0.532298	0.519947	0.321288	0.317063	395.4	0.01625	0.015118	0.157396	0.151419	0.072766	0.069179	0.238945	0.22922	581.01	0.047568	0.049088	0.077889
491.74	0.0124882	0.00031789	0.0315611	0.00145975	0.00361108	8.6e-06	0.00467739	6.297e-05	0.0031354	1.369e-05	0.00574977	0.00013694	0.0198086	0.00076035	975.6	0.0509898	0.0357832	0.330425	0.274922	0.138016	0.0929266	0.0223716	0.0117728	479.2	0.0747654	0.0699924	0.174883	0.174784	0.0282063	0.0224929	0.0131791	0.0118561	0.531915	0.519844	0.32122	0.317	395.6	0.016241	0.015135	0.157433	0.151522	0.073034	0.069249	0.238841	0.229259	581.21	0.047151	0.049095	0.077833
491.94	0.0126458	0.00030691	0.0312296	0.00140929	0.00385721	8.31e-06	0.00478013	6.079e-05	0.00309906	1.321e-05	0.0058733	0.00013221	0.0200826	0.00073406	975.8	0.0508318	0.0358281	0.330571	0.275239	0.138104	0.0930408	0.0222379	0.0117877	479.4	0.0757325	0.0699785	0.175677	0.174749	0.0285578	0.0224884	0.0137236	0.0118537	0.53203	0.51974	0.321644	0.316937	395.8	0.016438	0.015152	0.157188	0.151625	0.07253	0.069318	0.238573	0.229298	581.41	0.047385	0.049102	0.078367
492.14	0.0126975	0.0002963	0.0312354	0.00136057	0.00370493	8.02e-06	0.00486512	5.869e-05	0.00304504	1.276e-05	0.00593754	0.00012764	0.0204356	0.00070869	976	0.050566	0.035873	0.330852	0.275555	0.137904	0.093155	0.021974	0.0118026	479.6	0.0760294	0.0699646	0.175903	0.174714	0.0283991	0.0224839	0.0134176	0.0118514	0.532195	0.519637	0.321364	0.316874	396	0.016499	0.015169	0.157199	0.151727	0.072382	0.069388	0.238762	0.229337	581.61	0.04786	0.049109	0.078452
492.34	0.0126598	0.00028605	0.0311353	0.00131354	0.00356266	7.74e-06	0.00535412	5.666e-05	0.00291512	1.232e-05	0.00627492	0.00012323	0.0207049	0.00068419	976.2	0.0499891	0.0359179	0.330991	0.275871	0.138011	0.0932691	0.0220524	0.0118175	479.8	0.0764573	0.0699506	0.176434	0.174679	0.0282717	0.0224795	0.0137648	0.011849	0.531633	0.519533	0.321714	0.316811	396.2	0.016078	0.015186	0.157444	0.15183	0.072155	0.069457	0.238649	0.229375	581.81	0.047755	0.049116	0.078047
492.54	0.0125459	0.00027617	0.0308922	0.00126813	0.00363634	7.47e-06	0.00553906	5.47e-05	0.00287352	1.189e-05	0.00674799	0.00011897	0.0207546	0.00066054	976.4	0.0500247	0.0359629	0.330565	0.276188	0.137782	0.0933832	0.021622	0.0118323	480	0.0767308	0.0699367	0.176893	0.174645	0.0282811	0.022475	0.0138521	0.0118466	0.531384	0.51943	0.321837	0.316747	396.4	0.015689	0.015204	0.157454	0.151932	0.071724	0.069527	0.238578	0.229414	582.01	0.047507	0.049123	0.07802
492.74	0.0123288	0.00026662	0.030609	0.00122429	0.00385173	7.22e-06	0.00544326	5.281e-05	0.00264827	1.148e-05	0.00715304	0.00011485	0.0205126	0.00063771	976.6	0.0504084	0.0360078	0.330823	0.276504	0.13804	0.0934974	0.0219145	0.0118472	480.2	0.0769949	0.0699228	0.177322	0.17461	0.028416	0.0224705	0.0137545	0.0118443	0.531462	0.519326	0.321861	0.316684	396.6	0.015179	0.015221	0.157845	0.152034	0.071684	0.069596	0.238986	0.229452	582.21	0.047224	0.04913	0.077523
492.94	0.0120193	0.0002574	0.0302325	0.00118197	0.00387572	6.97e-06	0.0057109	5.098e-05	0.00196948	1.108e-05	0.00739583	0.00011088	0.0201026	0.00061566	976.8	0.050352	0.0360527	0.331116	0.27682	0.13768	0.0936115	0.0218095	0.0118621	480.4	0.0769595	0.0699088	0.177457	0.174575	0.0286903	0.022466	0.0137801	0.0118419	0.531851	0.519223	0.321682	0.316621	396.8	0.015159	0.015238	0.157807	0.152136	0.071031	0.069665	0.238729	0.22949	582.41	0.04646	0.049137	0.07759
493.14	0.0115057	0.0002485	0.0297742	0.00114111	0.00342861	6.73e-06	0.00563517	4.922e-05	0.0012456	1.07e-05	0.00741492	0.00010705	0.0195779	0.00059438	977	0.0510926	0.0360976	0.331486	0.277136	0.137562	0.0937256	0.021227	0.011877	480.6	0.0770327	0.0698949	0.177527	0.17454	0.0289487	0.0224616	0.0137897	0.0118396	0.531673	0.51912	0.321389	0.316558	397	0.015737	0.015255	0.158662	0.152238	0.071791	0.069735	0.239251	0.229528	582.61	0.046212	0.049143	0.077864
493.34	0.0114524	0.00023991	0.0299125	0.00110167	0.00308512	6.49e-06	0.00528329	4.752e-05	0.00052052	1.033e-05	0.00740368	0.00010335	0.0191374	0.00057383	977.2	0.0513669	0.0361425	0.331606	0.277452	0.137528	0.0938396	0.0214317	0.0118918	480.8	0.0769098	0.069881	0.177558	0.174505	0.0287368	0.0224571	0.0140303	0.0118372	0.531235	0.519016	0.32116	0.316495	397.2	0.015871	0.015272	0.158887	0.15234	0.071935	0.069804	0.239197	0.229566	582.81	0.046449	0.04915	0.077712
493.54	0.011415	0.00023162	0.0299764	0.00106359	0.0034694	6.27e-06	0.00579552	4.588e-05	0.00034431	9.97e-06	0.0076434	9.978e-05	0.0188656	0.000554	977.4	0.0513883	0.0361874	0.332403	0.277768	0.137757	0.0939537	0.0210851	0.0119067	481	0.076545	0.0698671	0.177634	0.174471	0.0291674	0.0224526	0.0136782	0.0118348	0.53058	0.518913	0.321068	0.316432	397.4	0.01645	0.015289	0.159288	0.152442	0.072311	0.069873	0.239287	0.229604	583.01	0.046854	0.049157	0.078126
493.74	0.0114524	0.00022361	0.0294914	0.00102682	0.00334526	6.05e-06	0.00593727	4.429e-05	-0.00021417	9.63e-06	0.00804612	9.633e-05	0.0183205	0.00053485	977.6	0.051433	0.0362323	0.332558	0.278084	0.13813	0.0940678	0.0215047	0.0119216	481.2	0.0760871	0.0698532	0.177311	0.174436	0.0292749	0.0224481	0.0133083	0.0118325	0.529742	0.51881	0.320667	0.316369	397.6	0.017135	0.015306	0.159915	0.152543	0.072976	0.069942	0.239436	0.229641	583.21	0.046898	0.049164	0.078259
493.94	0.0111473	0.00021588	0.0294131	0.00099132	0.00315765	5.84e-06	0.00597467	4.276e-05	-0.00019821	9.3e-06	0.00799998	9.3e-05	0.0184175	0.00051636	977.8	0.0511234	0.0362772	0.332346	0.2784	0.137558	0.0941818	0.0215835	0.0119365	481.4	0.0753918	0.0698393	0.176882	0.174401	0.0295147	0.0224437	0.0130156	0.0118301	0.529545	0.518706	0.320036	0.316306	397.8	0.017823	0.015324	0.160739	0.152644	0.073461	0.070011	0.239852	0.229679	583.41	0.046935	0.04917	0.077997
494.14	0.0107243	0.00020842	0.0290885	0.00095706	0.00290916	5.64e-06	0.00604502	4.128e-05	-0.00049046	8.97e-06	0.00791421	8.978e-05	0.0182625	0.00049851	978	0.0517359	0.0363221	0.333256	0.278716	0.138075	0.0942959	0.0221473	0.0119513	481.6	0.0746349	0.0698254	0.175989	0.174367	0.0289292	0.0224392	0.0120882	0.0118278	0.529323	0.518603	0.319777	0.316243	398	0.018122	0.015341	0.161044	0.152746	0.073428	0.070081	0.240092	0.229716	583.61	0.047189	0.049177	0.077793
494.34	0.0102585	0.00020122	0.0288726	0.00092397	0.00243325	5.45e-06	0.00590008	3.986e-05	-0.00051812	8.66e-06	0.00831046	8.668e-05	0.0177997	0.00048128	978.2	0.0515968	0.036367	0.33345	0.279031	0.137682	0.0944099	0.0219918	0.0119662	481.8	0.074498	0.0698114	0.175613	0.174332	0.02841	0.0224347	0.0118449	0.0118254	0.528687	0.5185	0.319418	0.31618	398.2	0.018023	0.015358	0.161065	0.152847	0.073861	0.07015	0.240548	0.229753	583.81	0.047756	0.049184	0.077634
494.54	0.00997173	0.00019426	0.0286453	0.00089203	0.00204264	5.26e-06	0.00556145	3.848e-05	-4.267e-05	8.36e-06	0.00886807	8.368e-05	0.0172162	0.00046464	978.4	0.0513579	0.0364119	0.333764	0.279347	0.137616	0.0945239	0.0220941	0.0119811	482	0.0741979	0.0697975	0.175606	0.174297	0.0280497	0.0224303	0.0117539	0.011823	0.528694	0.518396	0.319013	0.316117	398.4	0.018181	0.015375	0.161175	0.152947	0.074065	0.070219	0.241029	0.22979	584.01	0.048019	0.04919	0.077721
494.74	0.00959066	0.00018755	0.0283113	0.0008612	0.0016515	5.08e-06	0.0048691	3.715e-05	0.00022907	8.08e-06	0.00905792	8.079e-05	0.0166206	0.00044858	978.6	0.0517471	0.0364568	0.334025	0.279662	0.137642	0.0946379	0.0223414	0.011996	482.2	0.0740625	0.0697837	0.175461	0.174262	0.0281599	0.0224258	0.0114964	0.0118207	0.528807	0.518293	0.318825	0.316054	398.6	0.018224	0.015392	0.160754	0.153048	0.074368	0.070288	0.24083	0.229827	584.21	0.049072	0.049197	0.078014
494.94	0.00929808	0.00018106	0.0283551	0.00083143	0.00125886	4.9e-06	0.00421506	3.586e-05	0.00019553	7.8e-06	0.00901289	7.8e-05	0.0162028	0.00043307	978.8	0.0518006	0.0365016	0.334658	0.279977	0.138563	0.0947518	0.0228716	0.0120108	482.4	0.074222	0.0697698	0.175093	0.174228	0.0274373	0.0224213	0.0115272	0.0118184	0.528632	0.51819	0.318386	0.315991	398.8	0.018457	0.015409	0.160847	0.153149	0.074484	0.070356	0.24106	0.229863	584.41	0.049311	0.049204	0.078703
495.14	0.00931483	0.0001748	0.0287186	0.00080269	0.00121411	4.73e-06	0.00410899	3.462e-05	0.00044174	7.53e-06	0.00905268	7.53e-05	0.0158912	0.0004181	979	0.0516241	0.0365465	0.33514	0.280293	0.138698	0.0948658	0.0227662	0.0120257	482.6	0.0749063	0.0697559	0.175174	0.174193	0.0279646	0.0224169	0.0116311	0.011816	0.52864	0.518087	0.318748	0.315928	399	0.018538	0.015426	0.16081	0.153249	0.074376	0.070425	0.241239	0.2299	584.61	0.050259	0.04921	0.079241
495.34	0.00879517	0.00016876	0.0279422	0.00077494	0.00092647	4.57e-06	0.00381143	3.343e-05	0.00064088	7.27e-06	0.00866373	7.27e-05	0.0154446	0.00040365	979.2	0.0516093	0.0365914	0.33588	0.280608	0.139096	0.0949798	0.0225186	0.0120406	482.8	0.0755858	0.069742	0.17585	0.174158	0.0287343	0.0224124	0.0128279	0.0118136	0.529379	0.517984	0.319081	0.315865	399.2	0.018949	0.015443	0.161117	0.153349	0.074596	0.070494	0.241178	0.229936	584.81	0.050618	0.049217	0.079763
495.54	0.00853674	0.00016293	0.0274935	0.00074815	0.00090099	4.41e-06	0.00357345	3.227e-05	0.0008815	7.02e-06	0.00853232	7.019e-05	0.0152351	0.00038969	979.4	0.0519121	0.0366363	0.336882	0.280923	0.139577	0.0950937	0.0226025	0.0120554	483	0.0751349	0.0697281	0.175812	0.174124	0.0284576	0.0224079	0.0127142	0.0118113	0.529074	0.51788	0.31911	0.315803	399.4	0.018694	0.01546	0.160978	0.153449	0.073436	0.070563	0.240603	0.229972	585.01	0.050685	0.049223	0.079972
495.74	0.00806735	0.0001573	0.0271561	0.00072229	0.0012271	4.26e-06	0.00363469	3.116e-05	0.00112991	6.77e-06	0.00824865	6.776e-05	0.0150716	0.00037622	979.6	0.0513907	0.0366811	0.337223	0.281238	0.139574	0.0952076	0.0225595	0.0120703	483.2	0.0754129	0.0697142	0.17604	0.174089	0.0282658	0.0224035	0.0130004	0.0118089	0.52884	0.517777	0.319753	0.31574	399.6	0.018699	0.015477	0.161009	0.153549	0.073445	0.070632	0.24059	0.230008	585.21	0.050668	0.04923	0.080131
495.94	0.00821941	0.00015186	0.0271529	0.00069732	0.00142745	4.11e-06	0.00348196	3.008e-05	0.00083928	6.54e-06	0.00787845	6.542e-05	0.0153146	0.00036322	979.8	0.0509685	0.036726	0.337405	0.281553	0.139475	0.0953216	0.0220674	0.0120852	483.4	0.0753042	0.0697003	0.176047	0.174054	0.0278367	0.022399	0.0125253	0.0118066	0.528314	0.517674	0.319798	0.315677	399.8	0.018477	0.015494	0.160781	0.153649	0.072963	0.0707	0.24069	0.230044	585.41	0.05082	0.049236	0.08036
496.14	0.00804352	0.00014661	0.0271327	0.00067322	0.0017642	3.97e-06	0.00333479	2.904e-05	0.00059477	6.31e-06	0.0073849	6.316e-05	0.0155643	0.00035066	980	0.0505449	0.0367709	0.337928	0.281867	0.139861	0.0954355	0.021625	0.0121	483.6	0.0749132	0.0696864	0.175595	0.17402	0.0274338	0.0223946	0.0122669	0.0118042	0.528433	0.517571	0.319843	0.315614	400	0.018725	0.015511	0.160818	0.153749	0.073731	0.070769	0.24158	0.23008	585.61	0.050958	0.049242	0.080678
496.34	0.00804206	0.00014154	0.0269406	0.00064994	0.00209356	3.83e-06	0.00340515	2.804e-05	0.00036878	6.09e-06	0.00710224	6.097e-05	0.0157036	0.00033854	980.2	0.0502705	0.0368157	0.338264	0.282182	0.140266	0.0955493	0.0214383	0.0121149	483.8	0.0751054	0.0696725	0.175263	0.173985	0.027828	0.0223901	0.012371	0.0118019	0.528323	0.517468	0.319824	0.315551	400.2	0.018147	0.015529	0.160234	0.153848	0.07346	0.070838	0.241226	0.230115	585.81	0.050602	0.049249	0.07981
496.54	0.00814228	0.00013665	0.0265411	0.00062748	0.00217717	3.7e-06	0.00321692	2.707e-05	0.00014006	5.88e-06	0.00712327	5.887e-05	0.0156232	0.00032684	980.4	0.0505078	0.0368606	0.338531	0.282497	0.140371	0.0956632	0.0210826	0.0121298	484	0.0746431	0.0696587	0.17508	0.17395	0.0278835	0.0223856	0.0122244	0.0117995	0.528361	0.517365	0.320242	0.315488	400.4	0.017802	0.015546	0.160402	0.153948	0.073344	0.070906	0.240817	0.230151	586.01	0.05082	0.049255	0.080542
496.74	0.00826334	0.00013192	0.0262069	0.00060579	0.00218119	3.57e-06	0.0030268	2.613e-05	-1.67e-05	5.68e-06	0.00729119	5.683e-05	0.0154645	0.00031554	980.6	0.0505964	0.0369055	0.338992	0.282811	0.14077	0.0957771	0.0210876	0.0121446	484.2	0.0745571	0.0696448	0.17494	0.173916	0.0281208	0.0223812	0.0125384	0.0117972	0.528453	0.517262	0.320397	0.315425	400.6	0.018071	0.015563	0.1608	0.154047	0.073632	0.070975	0.240786	0.230186	586.21	0.050404	0.049261	0.080248
496.94	0.00855568	0.00012736	0.0262667	0.00058484	0.00247603	3.45e-06	0.0034579	2.523e-05	-1.34e-05	5.48e-06	0.00746498	5.487e-05	0.0153158	0.00030463	980.8	0.0507515	0.0369503	0.339332	0.283126	0.140792	0.0958909	0.0209093	0.0121595	484.4	0.0745581	0.0696309	0.174726	0.173881	0.0280896	0.0223767	0.0127191	0.0117948	0.5281	0.517159	0.320481	0.315363	400.8	0.018155	0.01558	0.160672	0.154146	0.073145	0.071043	0.240884	0.230221	586.41	0.049943	0.049268	0.080287
497.14	0.00904196	0.00012296	0.0266296	0.00056463	0.00297888	3.33e-06	0.00429399	2.436e-05	0.00016823	5.29e-06	0.00766447	5.297e-05	0.0153627	0.0002941	981	0.0507809	0.0369952	0.339314	0.28344	0.141133	0.0960047	0.0206885	0.0121744	484.6	0.0744872	0.0696171	0.174803	0.173846	0.0282366	0.0223723	0.0130432	0.0117925	0.527997	0.517056	0.320602	0.3153	401	0.018392	0.015597	0.161252	0.154245	0.073656	0.071112	0.241238	0.230256	586.61	0.049657	0.049274	0.080081
497.34	0.00960135	0.00011871	0.0270582	0.00054511	0.0031031	3.21e-06	0.00475714	2.351e-05	0.00037504	5.11e-06	0.00754839	5.114e-05	0.0152486	0.00028394	981.2	0.0507749	0.03704	0.33941	0.283754	0.141375	0.0961186	0.0204044	0.0121892	484.8	0.0746179	0.0696032	0.174568	0.173812	0.0283577	0.0223678	0.012969	0.0117901	0.527426	0.516953	0.320887	0.315237	401.2	0.018456	0.015614	0.161779	0.154343	0.074135	0.07118	0.241348	0.230291	586.81	0.049536	0.04928	0.079509
497.54	0.0099569	0.00011461	0.0271487	0.00052627	0.00342635	3.1e-06	0.00554028	2.27e-05	0.00064172	4.93e-06	0.00741983	4.937e-05	0.0151461	0.00027412	981.4	0.0505255	0.0370849	0.339449	0.284068	0.141616	0.0962324	0.0204078	0.0122041	485	0.0739819	0.0695893	0.174199	0.173777	0.0285511	0.0223634	0.0126558	0.0117878	0.526764	0.51685	0.320456	0.315174	401.4	0.018926	0.015631	0.162233	0.154442	0.074544	0.071248	0.241983	0.230326	587.01	0.049253	0.049286	0.078996
497.74	0.0100403	0.00011065	0.0273367	0.00050807	0.00345779	2.99e-06	0.00631094	2.192e-05	0.00100505	4.76e-06	0.00759795	4.766e-05	0.0152582	0.00026464	981.6	0.0510291	0.0371297	0.339216	0.284382	0.14169	0.0963462	0.0211128	0.0122189	485.2	0.073999	0.0695755	0.174111	0.173743	0.0283876	0.0223589	0.0127436	0.0117854	0.526584	0.516747	0.320275	0.315111	401.6	0.018932	0.015648	0.162828	0.154541	0.074925	0.071317	0.242138	0.23036	587.21	0.048591	0.049293	0.078708
497.94	0.0102378	0.00010682	0.0279649	0.00049051	0.00345834	2.89e-06	0.00689243	2.116e-05	0.001563	4.6e-06	0.00811698	4.602e-05	0.0157382	0.0002555	981.8	0.0513692	0.0371746	0.339674	0.284696	0.141446	0.09646	0.0210873	0.0122338	485.4	0.0736518	0.0695616	0.173926	0.173708	0.0284009	0.0223545	0.0126531	0.0117831	0.526108	0.516644	0.319747	0.315049	401.8	0.0188	0.015665	0.162729	0.154639	0.075098	0.071385	0.242255	0.230395	587.41	0.048435	0.049299	0.078643
498.14	0.0106797	0.00010313	0.0284315	0.00047356	0.00364041	2.79e-06	0.00743714	2.043e-05	0.00179648	4.44e-06	0.0088001	4.443e-05	0.0159913	0.00024666	982	0.0515606	0.0372194	0.339653	0.28501	0.141149	0.0965737	0.0210417	0.0122487	485.6	0.0737644	0.0695478	0.17365	0.173673	0.0279695	0.02235	0.0122786	0.0117807	0.525771	0.516541	0.319326	0.314986	402	0.018327	0.015682	0.162156	0.154737	0.075074	0.071453	0.242132	0.230429	587.61	0.049457	0.049305	0.079031
498.34	0.0110349	9.956e-05	0.0284197	0.00045719	0.00355911	2.69e-06	0.00769031	1.972e-05	0.00187728	4.29e-06	0.00921074	4.289e-05	0.0157795	0.00023814	982.2	0.0514005	0.0372642	0.339302	0.285324	0.140738	0.0966875	0.0208253	0.0122635	485.8	0.0736693	0.0695339	0.173396	0.173639	0.0274939	0.0223455	0.0123722	0.0117784	0.525266	0.516438	0.318837	0.314923	402.2	0.018301	0.015699	0.162075	0.154835	0.07526	0.071521	0.242404	0.230463	587.81	0.049625	0.049311	0.079166
498.54	0.0108699	9.612e-05	0.0281396	0.00044138	0.00347634	2.6e-06	0.00732182	1.904e-05	0.00167554	4.14e-06	0.00912776	4.141e-05	0.0154681	0.00022991	982.4	0.0521425	0.0373091	0.33956	0.285638	0.141366	0.0968012	0.0213895	0.0122784	486	0.0735864	0.0695201	0.173624	0.173604	0.0277041	0.0223411	0.0127234	0.011776	0.525619	0.516336	0.318837	0.314861	402.4	0.017693	0.015716	0.161733	0.154933	0.075107	0.07159	0.241968	0.230497	588.01	0.049902	0.049317	0.07984
498.74	0.0110041	9.28e-05	0.0283186	0.00042612	0.00347368	2.51e-06	0.00747433	1.838e-05	0.00206281	4e-06	0.00917977	3.998e-05	0.015763	0.00022196	982.6	0.0531056	0.0373539	0.339863	0.285952	0.141859	0.096915	0.0218608	0.0122933	486.2	0.0731603	0.0695062	0.172779	0.17357	0.026706	0.0223366	0.0120855	0.0117737	0.524582	0.516233	0.317962	0.314798	402.6	0.017166	0.015733	0.161439	0.155031	0.074713	0.071658	0.241563	0.230531	588.21	0.049989	0.049323	0.079718
498.94	0.0113516	8.959e-05	0.0284112	0.00041139	0.0033499	2.42e-06	0.00738509	1.775e-05	0.00238473	3.86e-06	0.00906824	3.859e-05	0.0157243	0.00021429	982.8	0.0533909	0.0373987	0.340256	0.286265	0.142114	0.0970287	0.0217444	0.0123081	486.4	0.0735253	0.0694924	0.17295	0.173535	0.0263621	0.0223322	0.0124316	0.0117714	0.524305	0.51613	0.317711	0.314735	402.8	0.017449	0.01575	0.161799	0.155128	0.074622	0.071726	0.242108	0.230565	588.41	0.050177	0.049329	0.079631
499.14	0.0117308	8.649e-05	0.0284528	0.00039717	0.00367785	2.34e-06	0.00759042	1.713e-05	0.00282974	3.72e-06	0.00910923	3.726e-05	0.0157367	0.00020688	983	0.0533752	0.0374436	0.340755	0.286579	0.142486	0.0971424	0.0217214	0.012323	486.6	0.0737368	0.0694786	0.173368	0.1735	0.0261171	0.0223278	0.0127338	0.011769	0.524066	0.516027	0.317444	0.314672	403	0.017408	0.015767	0.162227	0.155226	0.074696	0.071794	0.242267	0.230598	588.61	0.050925	0.049335	0.079353
499.34	0.0119519	8.35e-05	0.0282383	0.00038344	0.00373974	2.26e-06	0.00736154	1.654e-05	0.00328291	3.6e-06	0.00924207	3.597e-05	0.0158946	0.00019973	983.2	0.0535645	0.0374884	0.341315	0.286892	0.142823	0.0972561	0.0218819	0.0123378	486.8	0.0736546	0.0694647	0.173644	0.173466	0.025928	0.0223233	0.0129895	0.0117667	0.524	0.515924	0.317457	0.31461	403.2	0.017591	0.015784	0.162727	0.155323	0.074963	0.071862	0.24248	0.230632	588.81	0.050195	0.049341	0.079033
499.54	0.0119749	8.062e-05	0.0284821	0.00037019	0.00398747	2.18e-06	0.00671692	1.597e-05	0.00326218	3.47e-06	0.00967137	3.473e-05	0.0162296	0.00019282	983.4	0.0536229	0.0375332	0.341869	0.287205	0.142905	0.0973698	0.0222986	0.0123527	487	0.0729708	0.0694509	0.17316	0.173431	0.0255407	0.0223189	0.0124848	0.0117643	0.523151	0.515822	0.317	0.314547	403.4	0.017489	0.015801	0.162782	0.15542	0.074809	0.07193	0.242535	0.230665	589.01	0.049749	0.049347	0.078977
499.74	0.0118358	7.783e-05	0.0283782	0.00035739	0.00426608	2.11e-06	0.00592818	1.542e-05	0.00286284	3.35e-06	0.00926868	3.353e-05	0.0162895	0.00018616	983.6	0.0535583	0.037578	0.341754	0.287519	0.142659	0.0974834	0.0224202	0.0123675	487.2	0.0729215	0.0694371	0.173492	0.173397	0.0253724	0.0223144	0.0124184	0.011762	0.522967	0.515719	0.316656	0.314485	403.6	0.017463	0.015818	0.162495	0.155517	0.075323	0.071998	0.243009	0.230698	589.21	0.050172	0.049353	0.078989
499.94	0.0119697	7.514e-05	0.0281409	0.00034504	0.00431893	2.03e-06	0.00529844	1.488e-05	0.00258131	3.24e-06	0.00885113	3.237e-05	0.0165274	0.00017972	983.8	0.0533851	0.0376228	0.342253	0.287832	0.142406	0.0975971	0.0224722	0.0123824	487.4	0.0725205	0.0694232	0.17308	0.173362	0.0253193	0.02231	0.0121822	0.0117596	0.52274	0.515616	0.316528	0.314422	403.8	0.017463	0.015835	0.16227	0.155614	0.075211	0.072066	0.243347	0.230731	589.41	0.050262	0.049359	0.078602
500.14	0.0115931	7.254e-05	0.027566	0.00033311	0.00389628	1.96e-06	0.00453805	1.437e-05	0.00205285	3.12e-06	0.00788243	3.125e-05	0.0164136	0.00017351	984	0.0533242	0.0376676	0.342629	0.288145	0.142459	0.0977107	0.0224305	0.0123973	487.6	0.0724762	0.0694094	0.173011	0.173328	0.0254878	0.0223055	0.012321	0.0117573	0.52317	0.515514	0.316447	0.314359	404	0.017955	0.015852	0.162298	0.155711	0.076251	0.072133	0.24414	0.230764	589.61	0.050327	0.049365	0.078832
500.34	0.0110932	7.003e-05	0.0268537	0.00032159	0.00315057	1.9e-06	0.00350574	1.387e-05	0.00121172	3.02e-06	0.00693313	3.017e-05	0.016031	0.00016751	984.2	0.0530182	0.0377125	0.343429	0.288458	0.142495	0.0978243	0.0225152	0.0124121	487.8	0.0722176	0.0693956	0.17264	0.173293	0.0256427	0.0223011	0.0120901	0.011755	0.523018	0.515411	0.315857	0.314297	404.2	0.017745	0.015868	0.162116	0.155807	0.075626	0.072201	0.243772	0.230797	589.81	0.050569	0.04937	0.078781
500.54	0.010384	6.761e-05	0.0260126	0.00031048	0.0025819	1.83e-06	0.00263548	1.339e-05	0.000421	2.91e-06	0.00634182	2.913e-05	0.0152995	0.00016172	984.4	0.053001	0.0377573	0.343594	0.288771	0.142403	0.0979379	0.022047	0.012427	488	0.0722865	0.0693818	0.173021	0.173259	0.0259721	0.0222967	0.012407	0.0117526	0.523234	0.515308	0.316349	0.314234	404.4	0.018138	0.015885	0.162154	0.155904	0.075875	0.072269	0.243887	0.230829	590.01	0.050576	0.049376	0.079512
500.74	0.00991585	6.528e-05	0.0255715	0.00029975	0.00233374	1.77e-06	0.0023408	1.293e-05	0.00010507	2.81e-06	0.00593117	2.812e-05	0.0150236	0.00015613	984.6	0.052517	0.0378021	0.343986	0.289083	0.142734	0.0980516	0.0219913	0.0124418	488.2	0.0723736	0.0693679	0.1731	0.173224	0.0258741	0.0222922	0.0127504	0.0117503	0.522882	0.515206	0.316502	0.314171	404.6	0.019033	0.015902	0.163021	0.156	0.075811	0.072337	0.244506	0.230862	590.21	0.050674	0.049382	0.079659
500.94	0.00929944	6.302e-05	0.0249871	0.00028938	0.00226172	1.71e-06	0.00247207	1.248e-05	-0.00045658	2.71e-06	0.00496213	2.715e-05	0.0144444	0.00015073	984.8	0.0521819	0.0378469	0.344392	0.289396	0.142779	0.0981651	0.0216196	0.0124567	488.4	0.0725777	0.0693541	0.173098	0.17319	0.0263015	0.0222878	0.0125302	0.0117479	0.523056	0.515103	0.317	0.314109	404.8	0.019234	0.015919	0.163012	0.156096	0.075665	0.072404	0.245387	0.230894	590.41	0.050107	0.049388	0.079401
501.14	0.00905058	6.084e-05	0.0247353	0.00027938	0.00193435	1.65e-06	0.00261426	1.205e-05	-0.00057635	2.62e-06	0.00419269	2.621e-05	0.0141124	0.00014552	985	0.0522128	0.0378917	0.344915	0.289709	0.143258	0.0982787	0.021933	0.0124715	488.6	0.0730936	0.0693403	0.173179	0.173155	0.0266678	0.0222833	0.0131416	0.0117456	0.523812	0.515	0.317488	0.314046	405	0.019436	0.015936	0.163681	0.156192	0.075707	0.072472	0.245305	0.230926	590.61	0.049488	0.049393	0.079133
501.34	0.0087604	5.874e-05	0.0244988	0.00026972	0.00126327	1.59e-06	0.00184906	1.163e-05	-0.00051013	2.53e-06	0.00353812	2.53e-05	0.0136197	0.00014049	985.2	0.051688	0.0379365	0.344879	0.290021	0.143143	0.0983923	0.021431	0.0124864	488.8	0.0731738	0.0693265	0.17309	0.173121	0.0270001	0.0222789	0.0131328	0.0117433	0.523689	0.514898	0.317458	0.313984	405.2	0.019356	0.015953	0.163775	0.156288	0.075943	0.072539	0.245033	0.230958	590.81	0.049366	0.049399	0.078911
501.54	0.0085156	5.671e-05	0.0244117	0.0002604	0.0010554	1.53e-06	0.00170158	1.123e-05	-0.00047624	2.44e-06	0.00328937	2.443e-05	0.0133192	0.00013564	985.4	0.051913	0.0379813	0.344963	0.290334	0.143233	0.0985058	0.0219203	0.0125012	489	0.0730795	0.0693127	0.173157	0.173086	0.0272036	0.0222745	0.0130346	0.0117409	0.523267	0.514795	0.317016	0.313921	405.4	0.019443	0.01597	0.163617	0.156384	0.075558	0.072607	0.244941	0.23099	591.01	0.049214	0.049405	0.079033
501.74	0.0080866	5.475e-05	0.0246283	0.0002514	0.00100334	1.48e-06	0.00173679	1.084e-05	-0.00053664	2.36e-06	0.00334938	2.358e-05	0.0132022	0.00013095	985.6	0.052461	0.0380261	0.345419	0.290646	0.143229	0.0986193	0.0219323	0.0125161	489.2	0.0735644	0.0692989	0.17318	0.173052	0.027407	0.02227	0.0131511	0.0117386	0.52327	0.514693	0.316437	0.313859	405.6	0.019546	0.015987	0.163986	0.156479	0.076076	0.072674	0.24489	0.231022	591.21	0.049155	0.04941	0.079425
501.94	0.00768961	5.286e-05	0.0246558	0.00024271	0.00104843	1.43e-06	0.00105462	1.047e-05	-0.00065769	2.28e-06	0.0036538	2.277e-05	0.0131091	0.00012642	985.8	0.0523389	0.0380709	0.345737	0.290958	0.142967	0.0987329	0.0219696	0.0125309	489.4	0.0738343	0.0692851	0.172848	0.173017	0.0277369	0.0222656	0.0129848	0.0117363	0.52298	0.51459	0.316298	0.313796	405.8	0.019808	0.016004	0.163465	0.156574	0.076479	0.072742	0.245475	0.231054	591.41	0.049223	0.049416	0.079646
502.14	0.00798769	5.103e-05	0.0245623	0.00023432	0.0011654	1.38e-06	0.00083215	1.011e-05	-0.0007194	2.2e-06	0.00445258	2.198e-05	0.0129176	0.00012205	986	0.0521787	0.0381156	0.345553	0.29127	0.142794	0.0988464	0.0213572	0.0125458	489.6	0.073397	0.0692713	0.172115	0.172983	0.0272667	0.0222612	0.0125192	0.0117339	0.522656	0.514488	0.316044	0.313734	406	0.019859	0.016021	0.163173	0.15667	0.075946	0.072809	0.245493	0.231085	591.61	0.05007	0.049422	0.080348
502.34	0.00806324	4.926e-05	0.0246477	0.00022622	0.00101479	1.33e-06	0.00095229	9.76e-06	-0.00079406	2.12e-06	0.00493701	2.122e-05	0.0125543	0.00011783	986.2	0.0527486	0.0381604	0.346169	0.291582	0.14392	0.0989599	0.0214786	0.0125606	489.8	0.072984	0.0692575	0.171684	0.172948	0.0269976	0.0222567	0.0123171	0.0117316	0.522109	0.514385	0.315839	0.313671	406.2	0.019895	0.016038	0.1635	0.156765	0.07552	0.072877	0.245555	0.231117	591.81	0.050058	0.049427	0.080289
502.54	0.00796427	4.756e-05	0.0245781	0.0002184	0.00129574	1.29e-06	0.00113221	9.42e-06	-0.0008065	2.05e-06	0.0057401	2.049e-05	0.0127905	0.00011376	986.4	0.0533904	0.0382052	0.346735	0.291894	0.144399	0.0990734	0.0215864	0.0125755	490	0.0729977	0.0692437	0.171376	0.172914	0.0267646	0.0222523	0.0122815	0.0117292	0.521922	0.514283	0.315721	0.313609	406.4	0.019441	0.016055	0.163174	0.15686	0.075573	0.072944	0.245354	0.231148	592.01	0.050052	0.049433	0.080229
502.74	0.0087746	4.592e-05	0.0248936	0.00021085	0.00146706	1.24e-06	0.00190611	9.09e-06	-7.223e-05	1.98e-06	0.00651033	1.978e-05	0.0130082	0.00010983	986.6	0.053753	0.03825	0.346883	0.292206	0.144449	0.0991868	0.021691	0.0125903	490.2	0.0723847	0.0692299	0.170836	0.17288	0.025921	0.0222478	0.0116613	0.0117269	0.521057	0.514181	0.314846	0.313546	406.6	0.01968	0.016071	0.163556	0.156955	0.075442	0.073011	0.245431	0.231179	592.21	0.049803	0.049438	0.079335
502.94	0.0093117	4.433e-05	0.0247105	0.00020356	0.0016165	1.2e-06	0.00176087	8.78e-06	0.00019855	1.91e-06	0.00708346	1.91e-05	0.0125801	0.00010603	986.8	0.0536542	0.0382948	0.347214	0.292518	0.144841	0.0993003	0.0217166	0.0126052	490.4	0.0724752	0.0692161	0.171369	0.172845	0.0260052	0.0222434	0.0123083	0.0117246	0.521031	0.514078	0.314835	0.313484	406.8	0.01977	0.016088	0.163678	0.157049	0.076076	0.073079	0.245521	0.23121	592.41	0.049927	0.049444	0.07843
503.14	0.0098599	4.28e-05	0.0249526	0.00019652	0.00202224	1.16e-06	0.00212997	8.48e-06	0.00106374	1.84e-06	0.00770244	1.844e-05	0.0128502	0.00010236	987	0.0534579	0.0383395	0.347609	0.29283	0.145474	0.0994137	0.0219198	0.01262	490.6	0.0721742	0.0692023	0.17129	0.172811	0.0253716	0.022239	0.0117338	0.0117222	0.520635	0.513976	0.314412	0.313422	407	0.019519	0.016105	0.16395	0.157144	0.076454	0.073146	0.245508	0.231241	592.61	0.049864	0.049449	0.077817
503.34	0.0101959	4.132e-05	0.0250137	0.00018973	0.00195031	1.12e-06	0.00215611	8.18e-06	0.00188224	1.78e-06	0.00788489	1.78e-05	0.0131744	9.883e-05	987.2	0.053852	0.0383843	0.347674	0.293142	0.145604	0.0995272	0.0218834	0.0126348	490.8	0.072246	0.0691886	0.171427	0.172776	0.025686	0.0222346	0.0120081	0.0117199	0.520667	0.513873	0.314654	0.313359	407.2	0.019248	0.016122	0.163841	0.157238	0.07686	0.073213	0.245532	0.231272	592.81	0.048937	0.049455	0.07737
503.54	0.0106039	3.989e-05	0.0250099	0.00018317	0.0020306	1.08e-06	0.00204752	7.9e-06	0.00242214	1.72e-06	0.00791753	1.718e-05	0.0134035	9.541e-05	987.4	0.0542886	0.0384291	0.347708	0.293453	0.145892	0.0996406	0.0223275	0.0126497	491	0.0719045	0.0691748	0.171202	0.172742	0.0255441	0.0222301	0.0115501	0.0117176	0.52057	0.513771	0.314181	0.313297	407.4	0.019093	0.016139	0.164118	0.157333	0.076703	0.07328	0.245281	0.231302	593.01	0.048969	0.04946	0.076983
503.74	0.0109708	3.851e-05	0.0251306	0.00017684	0.00239918	1.04e-06	0.00225188	7.63e-06	0.00306001	1.66e-06	0.00786324	1.659e-05	0.0135142	9.211e-05	987.6	0.0540162	0.0384738	0.346935	0.293765	0.14538	0.099754	0.0218109	0.0126645	491.2	0.07189	0.069161	0.17149	0.172708	0.0254814	0.0222257	0.0109467	0.0117152	0.520625	0.513669	0.313703	0.313234	407.6	0.018668	0.016156	0.163742	0.157427	0.076487	0.073347	0.244934	0.231333	593.21	0.048965	0.049465	0.076702
503.94	0.0109029	3.718e-05	0.0249306	0.00017073	0.00240468	1.01e-06	0.00243819	7.36e-06	0.00329928	1.6e-06	0.00745901	1.602e-05	0.0137325	8.893e-05	987.8	0.0541904	0.0385186	0.347758	0.294076	0.145834	0.0998674	0.0216422	0.0126794	491.4	0.0716116	0.0691472	0.171267	0.172673	0.025308	0.0222213	0.0111077	0.0117129	0.520558	0.513566	0.313651	0.313172	407.8	0.018308	0.016173	0.163445	0.157521	0.076359	0.073414	0.24492	0.231363	593.41	0.04825	0.049471	0.076351
504.14	0.0106671	3.589e-05	0.0246072	0.00016482	0.00212263	9.7e-07	0.00223212	7.11e-06	0.00310688	1.55e-06	0.00707064	1.546e-05	0.0139925	8.585e-05	988	0.0541852	0.0385634	0.348127	0.294387	0.146191	0.0999807	0.0215225	0.0126942	491.6	0.071883	0.0691335	0.171601	0.172639	0.0255455	0.0222169	0.0115544	0.0117106	0.520942	0.513464	0.313766	0.31311	408	0.018496	0.016189	0.16411	0.157615	0.076913	0.073481	0.245502	0.231393	593.61	0.047675	0.049476	0.077027
504.34	0.0108926	3.465e-05	0.0248486	0.00015913	0.0023869	9.4e-07	0.00281786	6.86e-06	0.00302092	1.49e-06	0.00677151	1.493e-05	0.0142446	8.289e-05	988.2	0.0539462	0.0386081	0.348766	0.294699	0.146519	0.100094	0.0215139	0.012709	491.8	0.0717889	0.0691197	0.171859	0.172604	0.0256466	0.0222124	0.0119259	0.0117082	0.520798	0.513362	0.313824	0.313047	408.2	0.018054	0.016206	0.163569	0.157708	0.076266	0.073548	0.244881	0.231424	593.81	0.048031	0.049482	0.077407
504.54	0.0106733	3.346e-05	0.024758	0.00015363	0.00247488	9.1e-07	0.00361112	6.63e-06	0.0028125	1.44e-06	0.00688122	1.441e-05	0.014253	8.002e-05	988.4	0.0538148	0.0386529	0.348841	0.29501	0.14666	0.100207	0.0213369	0.0127239	492	0.0722497	0.0691059	0.172391	0.17257	0.0262918	0.022208	0.0123213	0.0117059	0.520811	0.51326	0.314282	0.312985	408.4	0.017453	0.016223	0.163446	0.157802	0.075993	0.073615	0.24455	0.231454	594.01	0.047446	0.049487	0.077119
504.74	0.0102269	3.23e-05	0.0245243	0.00014832	0.00235451	8.7e-07	0.00362338	6.4e-06	0.00246612	1.39e-06	0.00665155	1.391e-05	0.0145176	7.725e-05	988.6	0.0537088	0.0386976	0.349864	0.295321	0.147376	0.100321	0.0216088	0.0127387	492.2	0.0720059	0.0690922	0.172268	0.172536	0.026084	0.0222036	0.0122946	0.0117036	0.520447	0.513157	0.314314	0.312923	408.6	0.017417	0.01624	0.163861	0.157895	0.075601	0.073682	0.244255	0.231483	594.21	0.047373	0.049492	0.077016
504.94	0.00974477	3.118e-05	0.0239751	0.00014319	0.00223847	8.4e-07	0.00355119	6.18e-06	0.00198858	1.34e-06	0.0064642	1.343e-05	0.0145853	7.458e-05	988.8	0.053943	0.0387424	0.350259	0.295632	0.147596	0.100434	0.0216476	0.0127536	492.4	0.0724262	0.0690784	0.172365	0.172501	0.0264071	0.0221992	0.0124407	0.0117012	0.520938	0.513055	0.314529	0.31286	408.8	0.0171	0.016257	0.164036	0.157989	0.075635	0.073749	0.244577	0.231513	594.41	0.046539	0.049497	0.076503
505.14	0.00953737	3.01e-05	0.0238919	0.00013824	0.00217399	8.1e-07	0.00356053	5.96e-06	0.00186364	1.3e-06	0.00665061	1.297e-05	0.014762	7.201e-05	989	0.0542924	0.0387871	0.350897	0.295943	0.147976	0.100547	0.0216463	0.0127684	492.6	0.0728211	0.0690647	0.17244	0.172467	0.0267565	0.0221947	0.0128843	0.0116989	0.521374	0.512953	0.314163	0.312798	409	0.016691	0.016274	0.164495	0.158082	0.075556	0.073816	0.244208	0.231543	594.61	0.046419	0.049503	0.076408
505.34	0.00908788	2.906e-05	0.0238525	0.00013346	0.00213963	7.9e-07	0.00331087	5.76e-06	0.00151049	1.25e-06	0.00659875	1.252e-05	0.0146084	6.952e-05	989.2	0.0541646	0.0388319	0.351139	0.296254	0.147612	0.100661	0.0217721	0.0127832	492.8	0.0721771	0.0690509	0.172175	0.172433	0.0268616	0.0221903	0.0123384	0.0116966	0.520619	0.512851	0.313568	0.312736	409.2	0.016545	0.01629	0.164518	0.158175	0.076027	0.073882	0.244433	0.231572	594.81	0.046833	0.049508	0.077452
505.54	0.00858684	2.806e-05	0.0239784	0.00012885	0.00212571	7.6e-07	0.00334184	5.56e-06	0.00115279	1.21e-06	0.00651598	1.209e-05	0.0143894	6.711e-05	989.4	0.0545504	0.0388766	0.351497	0.296564	0.147549	0.100774	0.0220713	0.0127981	493	0.0722314	0.0690372	0.1717	0.172398	0.0269075	0.0221859	0.0117954	0.0116942	0.520517	0.512749	0.31301	0.312673	409.4	0.016294	0.016307	0.164263	0.158268	0.075675	0.073949	0.244348	0.231602	595.01	0.046915	0.049513	0.077524
505.74	0.00817136	2.709e-05	0.0241691	0.00012439	0.00212469	7.3e-07	0.00353346	5.37e-06	0.00087095	1.17e-06	0.00663883	1.167e-05	0.0143714	6.479e-05	989.6	0.0544972	0.0389213	0.352048	0.296875	0.147707	0.100887	0.0220391	0.0128129	493.2	0.0721037	0.0690234	0.171609	0.172364	0.0269814	0.0221815	0.0113122	0.0116919	0.520343	0.512647	0.312772	0.312611	409.6	0.016601	0.016324	0.164383	0.15836	0.076078	0.074016	0.244626	0.231631	595.21	0.046905	0.049518	0.078006
505.94	0.00812061	2.615e-05	0.0244059	0.00012009	0.00194117	7.1e-07	0.00323437	5.18e-06	0.00035985	1.13e-06	0.00672931	1.127e-05	0.0142035	6.255e-05	989.8	0.0546542	0.0389661	0.352312	0.297185	0.147913	0.101001	0.0217029	0.0128278	493.4	0.072553	0.0690097	0.17179	0.17233	0.0268513	0.0221771	0.0113466	0.0116896	0.520221	0.512545	0.313073	0.312549	409.8	0.017016	0.016341	0.164323	0.158453	0.07618	0.074082	0.245188	0.23166	595.41	0.047445	0.049523	0.078614
506.14	0.00847997	2.525e-05	0.024941	0.00011594	0.00215723	6.8e-07	0.00356435	5e-06	-6.762e-05	1.09e-06	0.00746078	1.088e-05	0.0141127	6.039e-05	990	0.0546032	0.0390108	0.352688	0.297496	0.147909	0.101114	0.0214083	0.0128426	493.6	0.0722364	0.0689959	0.171163	0.172295	0.026624	0.0221726	0.0113049	0.0116873	0.519967	0.512443	0.312915	0.312487	410	0.016847	0.016358	0.164308	0.158545	0.076104	0.074149	0.245224	0.231689	595.61	0.048177	0.049528	0.079326
506.34	0.00824882	2.438e-05	0.0249964	0.00011193	0.00168215	6.6e-07	0.00337258	4.83e-06	-0.00075211	1.05e-06	0.00755196	1.05e-05	0.0139298	5.83e-05	990.2	0.0548651	0.0390555	0.353028	0.297806	0.148266	0.101227	0.0219023	0.0128574	493.8	0.0723966	0.0689822	0.171084	0.172261	0.0264939	0.0221682	0.0110265	0.0116849	0.519733	0.51234	0.312488	0.312424	410.2	0.017242	0.016374	0.164668	0.158638	0.07632	0.074216	0.245771	0.231718	595.81	0.048527	0.049534	0.079444
506.54	0.00804729	2.353e-05	0.0245754	0.00010806	0.00141692	6.4e-07	0.00320822	4.66e-06	-0.00122378	1.01e-06	0.0078368	1.014e-05	0.0140823	5.629e-05	990.4	0.0551523	0.0391003	0.353197	0.298117	0.147997	0.10134	0.0223884	0.0128723	494	0.0723249	0.0689684	0.170827	0.172227	0.026385	0.0221638	0.0113193	0.0116826	0.519928	0.512238	0.312308	0.312362	410.4	0.017419	0.016391	0.164967	0.15873	0.076847	0.074282	0.246186	0.231747	596.01	0.048271	0.049539	0.079361
506.74	0.00802964	2.272e-05	0.0244588	0.00010433	0.00111251	6.1e-07	0.0031619	4.5e-06	-0.00110992	9.8e-07	0.00780835	9.79e-06	0.0138072	5.434e-05	990.6	0.0556063	0.039145	0.35326	0.298427	0.147696	0.101453	0.0225911	0.0128871	494.2	0.0719023	0.0689547	0.171384	0.172192	0.0261129	0.0221594	0.0113176	0.0116803	0.519668	0.512136	0.312234	0.3123	410.6	0.017304	0.016408	0.164982	0.158822	0.076848	0.074349	0.246471	0.231775	596.21	0.048063	0.049544	0.078843
506.94	0.00795274	2.193e-05	0.0241087	0.00010072	0.0008299	5.9e-07	0.00285761	4.34e-06	-0.00097325	9.4e-07	0.0077104	9.45e-06	0.0134765	5.246e-05	990.8	0.0555452	0.0391897	0.353785	0.298737	0.147759	0.101567	0.0225615	0.0129019	494.4	0.072481	0.068941	0.171898	0.172158	0.0266917	0.022155	0.011916	0.011678	0.519716	0.512034	0.312427	0.312238	410.8	0.01713	0.016425	0.164969	0.158914	0.077202	0.074415	0.246713	0.231804	596.41	0.047826	0.049549	0.078481
507.14	0.00843564	2.118e-05	0.0240227	9.724e-05	0.00058553	5.7e-07	0.00308207	4.19e-06	-0.00048904	9.1e-07	0.00732585	9.12e-06	0.0135321	5.065e-05	991	0.0552212	0.0392344	0.353519	0.299047	0.147535	0.10168	0.0224087	0.0129168	494.6	0.0726921	0.0689272	0.171427	0.172124	0.0264403	0.0221506	0.0112655	0.0116756	0.519064	0.511932	0.31244	0.312176	411	0.017239	0.016442	0.165059	0.159006	0.077525	0.074481	0.247261	0.231832	596.61	0.047885	0.049554	0.07847
507.34	0.00891676	2.044e-05	0.0241044	9.388e-05	0.00057163	5.5e-07	0.0035315	4.05e-06	-9.464e-05	8.8e-07	0.00690454	8.81e-06	0.0135905	4.89e-05	991.2	0.055149	0.0392791	0.353442	0.299357	0.147417	0.101793	0.0221657	0.0129316	494.8	0.0727684	0.0689135	0.171202	0.172089	0.0263267	0.0221462	0.0112187	0.0116733	0.518827	0.511831	0.312222	0.312113	411.2	0.017486	0.016458	0.164949	0.159097	0.077924	0.074548	0.247582	0.231861	596.81	0.047707	0.049559	0.078443
507.54	0.00916848	1.974e-05	0.0245663	9.063e-05	0.00076118	5.3e-07	0.00404608	3.91e-06	0.0004072	8.5e-07	0.00654028	8.5e-06	0.0135182	4.721e-05	991.4	0.0548956	0.0393238	0.353273	0.299667	0.147685	0.101906	0.0226273	0.0129464	495	0.0728462	0.0688998	0.171144	0.172055	0.026149	0.0221418	0.0107762	0.011671	0.51881	0.511729	0.311722	0.312051	411.4	0.017933	0.016475	0.164995	0.159189	0.078016	0.074614	0.247377	0.231889	597.01	0.048321	0.049564	0.078625
[truncated: 31,189 more rows]
[truncated: 20 more columns]

## Sheet: Fig. 1a SEC
SEC traces abs 230 of the base designs in absence of peptide
[truncated: 2,113 more rows]

[truncated: 1 more sheets: Fig. 1e BLI]
