# Supplementary material for: Design of amyloidogenic peptide traps
Source: Nat Chem Biol. 2024 Mar 19;20(8):981–90. doi: 10.1038/s41589-024-01578-5 (PMC11288891; doi:10.1038/s41589-024-01578-5)
Supplement: Supplementary file 8 — Statistical source data. [file 41589_2024_1578_MOESM8_ESM.xlsx]

## Sheet: Fig. 4b
residue	SSP score
1	0.255
2	0.388
3	0.576
4	0.705
5	0.864
6	0.926
7	0.978
8	0.94
9	0.993
10	1.017
11	1.011
12	0.986
13	1.019
14	0.993
15	0.908
16	0.828
17	0.646
18	0.548
19	0.358
20	0.088
21	0.203
22	0.47
23	0.556
24	0.649
25	0.891
26	0.904
27	0.865
28	0.911
29	1.016
30	0.991
31	0.938
32	0.968
33	0.972
34	0.912
35	0.921
36	1.013
37	0.98
38	0.871
39	0.85
40	0.693
41	0.434
42	0.278
43	0.147
44	0.118
45	0.345
46	0.599
47	0.812
48	0.923
49	1.027
50	1.036
51	0.998
52	0.965
53	0.983
54	0.951
55	0.958
56	0.977
57	0.999
58	0.975
59	0.828
60	0.762
61	0.48
62	0.173
63	-0.301
64	-0.602
65	-0.888
66	-0.876
67	-0.897
68	-0.784
69	-0.537
70	-0.413
71	-0.407
72	-0.51
73	-0.653
74	-0.949
75	-1.098
76	-1.128
77	-1.018
78	-0.774
79	-0.589
80	-0.408
81	0.145
82	0.421
83	0.461
84	0.607
85	0.831
86	0.787
87	0.794
88	0.85
89	0.948
90	0.918
91	0.932
92	0.95
93	0.973
94	0.938
95	0.904
96	0.914
97	0.896
98	0.687
99	0.633
100	0.385
101	0.058
102	-0.36
103	-0.629
104	-0.908
105	-0.939
106	-0.96
107	-0.86
108	-0.705
109	-0.578
110	-0.305
111	-0.171
112	-0.107
113	-0.092
114	-0.133
115	-0.181
116	-0.23
117	-0.192
118	-0.07
119	-0.04
120	-0.01

## Sheet: Fig. 4c
residue	15N transverse relation rate	error
4	11.0385	0.470686
8	16.6831	0.290411
10	13.9335	0.359193
13	15.7485	0.0593934
15	13.3141	0.307401
16	17.6708	0.200557
18	14.7303	0.558019
19	27.1713	0.300715
20	11.6295	0.344661
21	10.2846	0.0639952
22	13.3198	0.07799
23	13.0945	0.092389
26	15.5003	0.199133
30	14.287	0.280104
31	13.5721	0.33699
32	14.4408	0.498787
34	15.261	0.460458
36	13.1705	0.173641
38	12.8634	0.553751
39	11.5438	0.179513
41	13.3994	0.082227
42	13.0909	0.102465
43	12.8339	0.0917291
44	9.05348	0.14485
45	9.83593	0.212583
46	16.2582	0.962181
47	12.4399	0.169597
48	13.7167	0.608549
49	11.0648	0.270064
50	13.3355	0.549343
51	13.4397	0.127389
52	12.8174	0.271096
53	13.5035	0.276279
55	13.2855	0.135794
56	13.533	0.259894
58	13.508	0.144669
61	13.5646	0.110008
62	13.1801	0.116748
63	14.7499	0.126885
65	14.488	0.260414
66	12.781	0.0712992
68	14.687	0.220664
69	15.557	0.348638
70	12.4604	0.123338
71	9.45367	0.171548
72	10.2908	0.176178
73	10.0089	0.265346
74	13.8458	0.0811735
75	13.2413	0.0436104
76	12.7592	0.588185
77	12.7969	0.158627
78	14.9833	0.444172
79	15.2083	0.296075
80	4.76805	3.69653
81	15.0902	0.38458
82	14.5708	0.168869
83	19.0469	0.361747
85	13.5833	0.205305
86	13.2668	0.310364
88	14.7	0.289415
89	14.4861	0.0928402
91	16.582	0.332668
92	13.9061	0.161993
93	12.5562	0.308584
95	13.8504	0.249076
101	13.262	0.239938
102	23.4696	0.318596
103	14.0153	0.297358
104	12.3089	0.261987
105	16.3238	0.299938
106	12.7458	0.165575
107	12.7893	0.141807
108	12.8088	0.139408
111	6.56324	0.182169
114	5.99764	0.173596
115	5.71296	0.100677
116	7.51915	0.509589
117	8.42835	0.132952
118	5.82999	0.0782089
119	6.73877	0.0965551
120	4.07515	0.0357128

## Sheet: Fig. 4f
Concentrations in Molar [M]
CH15.1																CH15.1 n-strand deletion																CH15.1 c-strand deletion
Time1	1.646E-08	Fit_1.646E-08	1.481E-07	Fit_1.481E-07	1.333E-06	Fit_1.333E-06	1.2E-05	Fit_1.2E-05	4E-06	Fit_4E-06	4.938E-08	Fit_4.938E-08	4.444E-07	Fit_4.444E-07		Time1	1.2E-05	Fit_1.2E-05	1.333E-06	Fit_1.333E-06	1.481E-07	Fit_1.481E-07	1.646E-08	Fit_1.646E-08	4.444E-07	Fit_4.444E-07	4.938E-08	Fit_4.938E-08	4E-06	Fit_4E-06		Time1	4e-06	Fit_4E-06	4.938e-05	Fit_4.938E-08	0.0004444	Fit_4.444E-07	1.646e-05	Fit_1.646E-08	0.0001481	Fit_1.481E-07	0.001333	Fit_1.333E-06	1.2E-05	Fit_1.2E-05
240	0.00079749	0	-0.00084736	0	0.00638807	0	0.0278736	0	0.0170994	0	-0.00183437	0	0.00424124	0		240	0.129824	0	0.00858932	0	-0.00311156	0	-0.00138048	0	0.00197977	0	-0.00295875	0	0.0511645	0		240	-0.00599	0	-0.01082	0	-0.00277	0	-0.00734	0	-0.00674	0	-0.00414	0	-0.00856	0
240.2	0.00061456	3.472e-05	-0.00026072	8.869e-05	0.00726449	0.00069273	0.0325714	0.0068494	0.0186604	0.00217228	-0.00196324	4.207e-05	0.00471995	0.00020436		240.2	0.135758	0.0142229	0.0104214	0.00077431	-0.00277142	6.033e-05	-0.00095696	4.613e-05	0.00299373	0.00027784	-0.00271028	5.092e-05	0.0536653	0.00326749		240.2	-0.00511	0	-0.01024	0	-0.00272	0	-0.00722	0	-0.00632	0	-0.00355	0	-0.00739	0
240.4	0.00100658	6.944e-05	0.0004006	0.00017736	0.00872024	0.001385	0.0384565	0.0136602	0.0204124	0.00434041	-0.00179963	8.414e-05	0.0051055	0.00040867		240.4	0.142696	0.0280469	0.0121157	0.00154207	-0.00259653	0.00012029	-0.00053097	9.199e-05	0.00370682	0.00055378	-0.00262587	0.00010153	0.05614	0.00649123		240.4	-0.00399	0	-0.00933	0	-0.00251	0	-0.00712	0	-0.00569	0	-0.00306	0	-0.00651	0
240.6	0.00107967	0.00010415	0.00087121	0.00026603	0.00945393	0.00207681	0.0445921	0.0204326	0.0222527	0.0065044	-0.00176135	0.00012621	0.00545827	0.00061293		240.6	0.150083	0.0414831	0.013943	0.00230335	-0.00215628	0.00017987	-3.17e-05	0.00013757	0.00455017	0.00082786	-0.00194976	0.00015183	0.0593022	0.00967182		240.6	-0.00298	0	-0.00848	0	-0.0024	0	-0.007	0	-0.00491	0	-0.0024	0	-0.00552	0
240.8	0.00132697	0.00013887	0.00182625	0.00035469	0.0108977	0.00276816	0.0515079	0.0271667	0.0246081	0.00866425	-0.00162998	0.00016827	0.00577279	0.00081714		240.8	0.158416	0.0545425	0.0159301	0.00305819	-0.00157296	0.00023907	0.00059121	0.00018288	0.00552103	0.00110007	-0.00147607	0.00020183	0.0624781	0.0128098		240.8	-0.00169	0	-0.00764	0	-0.00197	0	-0.00684	0	-0.0039	0	-0.00145	0	-0.0047	0
241	0.0009597	0.00017358	0.0020778	0.00044333	0.0115098	0.00345905	0.0580284	0.033863	0.0264108	0.01082	-0.00206596	0.00021034	0.00608754	0.0010213		241	0.167071	0.0672355	0.0176002	0.00380665	-0.00110795	0.00029791	0.00106751	0.00022791	0.00659101	0.00137042	-0.00102303	0.00025153	0.0657425	0.0159058		241	-0.0009	0	-0.00698	0	-0.00176	0	-0.00654	0	-0.00303	0	-0.00098	0	-0.00379	0
241.2	0.00086492	0.00020829	0.0019372	0.00053197	0.012334	0.00414948	0.0654685	0.0405214	0.0288221	0.0129716	-0.00198396	0.0002524	0.0059808	0.0012254		241.2	0.176054	0.0795726	0.0194812	0.0045488	-0.00047735	0.00035638	0.00168211	0.00027268	0.00748667	0.00163894	-0.00023733	0.00030092	0.0691556	0.0189604		241.2	-0.0003	0	-0.00622	0	-0.00121	0	-0.00633	0	-0.00217	0	-0.00027	0	-0.00309	0
241.4	0.00091227	0.000243	0.00232995	0.0006206	0.0133504	0.00483946	0.0733216	0.0471423	0.03149	0.0151191	-0.00226679	0.00029445	0.00593446	0.00142946		241.4	0.185071	0.0915636	0.0205561	0.00528467	-0.00031488	0.00041449	0.0021803	0.00031717	0.007923	0.00190564	4.023e-05	0.00035001	0.0722747	0.0219741		241.4	-2.4e-05	0	-0.00556	0	-0.00114	0	-0.00629	0	-0.00172	0	6.99e-05	0	-0.00279	0
241.6	0.00069102	0.00027771	0.0023241	0.00070922	0.014041	0.00552897	0.0805676	0.0537259	0.0337197	0.0172625	-0.00274532	0.00033651	0.00544089	0.00163347		241.6	0.194001	0.103218	0.021866	0.00601432	-0.00022199	0.00047223	0.00264053	0.0003614	0.00864533	0.00217052	0.00019588	0.00039881	0.075484	0.0249474		241.6	0.000218	0	-0.00536	0	-0.00113	0	-0.00606	0	-0.00133	0	0.000594	0	-0.00246	0
241.8	0.00038927	0.00031241	0.00212581	0.00079783	0.0144662	0.00621803	0.0878886	0.0602723	0.0361257	0.0194018	-0.00283438	0.00037856	0.00502381	0.00183742		241.8	0.201441	0.114546	0.0225545	0.00673781	-0.00027049	0.00052961	0.00241953	0.00040536	0.00877081	0.0024336	-0.00030091	0.00044731	0.0778826	0.0278809		241.8	0.000259	0	-0.00464	0	-0.0013	0	-0.00578	0	-0.0012	0	0.000999	0	-0.00224	0
242	0.00035597	0.00034712	0.00214581	0.00088642	0.015418	0.00690663	0.0945684	0.0667819	0.0383546	0.021537	-0.00253006	0.0004206	0.00482311	0.00204132		242	0.208872	0.125556	0.0231409	0.00745518	0.00011802	0.00058663	0.00261755	0.00044906	0.00882089	0.00269489	-0.00079043	0.00049552	0.0803075	0.0307752		242	0.000222	0	-0.00428	0	-0.00103	0	-0.0054	0	-0.00101	0	0.001175	0	-0.00199	0
242.2	-0.00025148	0.00038182	0.00175748	0.00097501	0.0159538	0.00759477	0.10097	0.0732547	0.0407107	0.0236681	-0.00216193	0.00046265	0.00471143	0.00224518		242.2	0.215017	0.136257	0.0229898	0.0081665	0.00047753	0.0006433	0.00295282	0.0004925	0.00854295	0.0029544	-0.00087875	0.00054343	0.0823523	0.0336307		242.2	-0.00046	0	-0.00437	0	-0.00109	0	-0.00537	0	-0.00113	0	0.001374	0	-0.00219	0
242.4	-0.00016506	0.00041652	0.00225613	0.00106359	0.0168401	0.00828245	0.108167	0.079691	0.0435753	0.0257952	-0.00162238	0.00050469	0.00516255	0.00244898		242.4	0.221165	0.146658	0.0238289	0.0088718	0.00054988	0.00069961	0.00290231	0.00053568	0.0084604	0.00321215	-0.00095187	0.00059105	0.0846508	0.036448		242.4	-0.00046	0	-0.00413	0	-0.00127	0	-0.00509	0	-0.00067	0	0.002369	0	-0.00189	0
242.6	-0.00017233	0.00045122	0.00191539	0.00115216	0.0179585	0.00896968	0.114465	0.0860911	0.0454033	0.0279182	-0.00151092	0.00054673	0.00541257	0.00265273		242.6	0.226851	0.156768	0.0245226	0.00957115	0.00026902	0.00075557	0.00248834	0.00057859	0.00804414	0.00346815	-0.00108003	0.00063839	0.0865296	0.0392276		242.6	-0.00076	0	-0.00435	0	-0.00185	0	-0.00573	0	-0.00116	0	0.001968	0	-0.0024	0
242.8	-0.00024311	0.00048592	0.00180483	0.00124072	0.0183601	0.00965645	0.120485	0.092455	0.0470852	0.0300371	-0.00134328	0.00058877	0.00516001	0.00285643		242.8	0.232987	0.166593	0.025418	0.0102646	0.00097099	0.00081118	0.00272144	0.00062125	0.00878366	0.00372241	5.68e-05	0.00068544	0.0886924	0.0419699		242.8	-0.00086	0	-0.00429	0	-0.00199	0	-0.00579	0	-0.00127	0	0.002059	0	-0.00206	0
243	-0.00034198	0.00052061	0.00233026	0.00132927	0.0195149	0.0103428	0.127607	0.0987831	0.0492588	0.032152	-0.00143291	0.00063081	0.00597823	0.00306008		243	0.238107	0.176144	0.0257388	0.0109522	0.00087752	0.00086644	0.00225571	0.00066366	0.00881814	0.00397494	0.00038859	0.0007322	0.090449	0.0446756		243	-0.00056	0	-0.00477	0	-0.00243	0	-0.00624	0	-0.00154	0	0.002129	0	-0.00188	0
243.2	-0.00017136	0.00055531	0.00273136	0.00141781	0.0201975	0.0110286	0.133563	0.105075	0.0513993	0.0342629	-0.00130674	0.00067284	0.00618933	0.00326368		243.2	0.243809	0.185426	0.0263131	0.0116339	0.00096239	0.00092136	0.00204097	0.00070581	0.00886778	0.00422575	0.00080868	0.00077868	0.0925167	0.047345		243.2	-0.00075	0	-0.00479	0	-0.00254	0	-0.0059	0	-0.00153	0	0.001934	0	-0.00175	0
243.4	-2.333e-05	0.00059	0.00311294	0.00150634	0.0206887	0.011714	0.139546	0.111332	0.0533984	0.0363697	-0.00146725	0.00071487	0.00656144	0.00346723		243.4	0.249217	0.194448	0.0267228	0.0123099	0.00058548	0.00097593	0.00192974	0.0007477	0.00881263	0.00447485	0.0003558	0.00082487	0.0940548	0.0499788		243.4	-0.00136	0	-0.0051	0	-0.00254	0	-0.00606	0	-0.00204	0	0.001586	0	-0.00175	0
243.6	0.00010858	0.00062469	0.0027779	0.00159486	0.0211055	0.012399	0.145451	0.117554	0.0547458	0.0384725	-0.00163163	0.00075689	0.00692776	0.00367073		243.6	0.254556	0.203217	0.027134	0.0129802	0.00051005	0.00103017	0.00155581	0.00078935	0.0092757	0.00472227	0.00029118	0.00087079	0.0959395	0.0525772		243.6	-0.00202	0	-0.00531	0	-0.00271	0	-0.00659	0	-0.00236	0	0.001815	0	-0.00195	0
243.8	0.00034072	0.00065938	0.00334767	0.00168337	0.0222929	0.0130835	0.152124	0.123741	0.0572901	0.0405713	-0.00145988	0.00079892	0.00789763	0.00387418		243.8	0.260312	0.21174	0.0285373	0.0136449	0.00112775	0.00108406	0.00178946	0.00083074	0.0102544	0.004968	0.00046119	0.00091643	0.0988572	0.0551409		243.8	-0.00183	0	-0.00551	0	-0.00243	0	-0.00608	0	-0.00286	0	0.001667	0	-0.00179	0
244	0.00085689	0.00069407	0.0035654	0.00177187	0.0231554	0.0137675	0.158057	0.129892	0.0594241	0.042666	-0.00100963	0.00084094	0.00870729	0.00407757		244	0.265156	0.220024	0.0299454	0.0143039	0.00109884	0.00113762	0.00146024	0.00087189	0.0107467	0.00521206	0.00049519	0.00096179	0.10114	0.0576702		244	-0.00211	0	-0.00624	0	-0.00318	0	-0.00626	0	-0.00358	0	0.001406	0	-0.00186	0
244.2	0.00137638	0.00072875	0.00424448	0.00186036	0.0245006	0.0144511	0.164586	0.136009	0.0619318	0.0447568	-0.00080512	0.00088296	0.00975106	0.00428092		244.2	0.269887	0.228075	0.0311043	0.0149573	0.00164853	0.00119084	0.00183988	0.00091278	0.011429	0.00545446	0.00120335	0.00100687	0.10355	0.0601657		244.2	-0.00207	0	-0.00625	0	-0.00333	0	-0.00627	0	-0.0041	0	0.001272	0	-0.00189	0
244.4	0.00224448	0.00076344	0.00464361	0.00194884	0.0257322	0.0151342	0.170787	0.142092	0.063766	0.0468436	-0.00037986	0.00092497	0.010226	0.00448421		244.4	0.275113	0.235901	0.0320383	0.0156052	0.00190666	0.00124373	0.00197355	0.00095344	0.0118756	0.00569521	0.00195788	0.00105169	0.105674	0.0626278		244.4	-0.00207	0	-0.0062	0	-0.00359	0	-0.00639	0	-0.00468	0	0.00075	0	-0.00221	0
244.6	0.00253293	0.00079812	0.00469027	0.00203731	0.0258375	0.0158169	0.176188	0.14814	0.06585	0.0489264	-0.00033477	0.00096699	0.010583	0.00468746		244.6	0.279504	0.243507	0.0329225	0.0162477	0.00192745	0.0012963	0.00181878	0.00099385	0.0122612	0.00593432	0.00256101	0.00109623	0.107672	0.0650569		244.6	-0.00131	0	-0.00559	0	-0.00269	0	-0.00564	0	-0.00438	0	0.001396	0	-0.00142	0
244.8	0.00289537	0.0008328	0.00520591	0.00212578	0.0268177	0.0164991	0.182031	0.154154	0.0682284	0.0510052	-0.00037978	0.001009	0.0112044	0.00489065		244.8	0.284373	0.2509	0.0337412	0.0168847	0.00207294	0.00134853	0.00215663	0.00103401	0.0126139	0.00617181	0.00252839	0.0011405	0.109581	0.0674535		244.8	-0.0011	0	-0.00574	0	-0.00204	0	-0.00531	0	-0.00444	0	0.00161	0	-0.001	0
245	0.00276024	0.00086748	0.0048787	0.00221423	0.0269163	0.0171809	0.187206	0.160134	0.070193	0.05308	-0.00079496	0.00105101	0.0110949	0.0050938		245	0.288998	0.258085	0.0339408	0.0175164	0.00231657	0.00140043	0.00212638	0.00107394	0.0130635	0.00640769	0.00251428	0.0011845	0.111543	0.069818		245	-0.0009	0	-0.00552	0	-0.00154	0	-0.00499	0	-0.00461	0	0.00145	0	-0.00099	0
245.2	0.00299907	0.00090216	0.00468995	0.00230267	0.0277154	0.0178622	0.193438	0.16608	0.0729438	0.0551509	-0.00054854	0.00109301	0.0109841	0.00529689		245.2	0.293292	0.265069	0.0346048	0.0181427	0.00227436	0.00145201	0.00188193	0.00111362	0.0129202	0.00664196	0.0024518	0.00122824	0.113445	0.0721509		245.2	-0.00099	0	-0.00522	0	-0.00082	0	-0.00468	0	-0.00417	0	0.001568	0	-0.00093	0
245.4	0.00348558	0.00093683	0.0054568	0.0023911	0.029134	0.018543	0.19936	0.171993	0.0755177	0.0572178	-0.00047724	0.00113501	0.0112467	0.00549993		245.4	0.297835	0.271857	0.0347306	0.0187637	0.00200839	0.00150327	0.00214709	0.00115307	0.0132659	0.00687464	0.00181183	0.00127171	0.115399	0.0744526		245.4	-0.00095	0	-0.00483	0	-0.00075	0	-0.00448	0	-0.00428	0	0.001591	0	-0.0008	0
245.6	0.00296699	0.0009715	0.00534286	0.00247952	0.0296701	0.0192235	0.204785	0.177873	0.0774632	0.0592807	-0.00048856	0.00117701	0.0109432	0.00570292		245.6	0.302096	0.278455	0.035451	0.0193794	0.00215207	0.00155421	0.00242715	0.00119228	0.0135876	0.00710573	0.0014874	0.00131491	0.117036	0.0767234		245.6	-0.00087	0	-0.00478	0	-0.00092	0	-0.00442	0	-0.00416	0	0.001529	0	-0.0007	0
245.8	0.00249718	0.00100618	0.00537771	0.00256794	0.0301816	0.0199034	0.210569	0.183719	0.079599	0.0613398	-0.00045675	0.00121901	0.0109173	0.00590586		245.8	0.305995	0.284868	0.0355728	0.01999	0.00249801	0.00160483	0.00230074	0.00123126	0.0134046	0.00733526	0.00115386	0.00135786	0.118452	0.0789638		245.8	-0.00061	0	-0.0038	0	-0.00104	0	-0.00412	0	-0.00387	0	0.001571	0	-0.00052	0
246	0.00215246	0.00104085	0.00552622	0.00265634	0.0310555	0.0205829	0.215733	0.189533	0.0819262	0.0633949	0.00013347	0.001261	0.0111926	0.00610876		246	0.310186	0.291101	0.0359727	0.0205954	0.00275727	0.00165514	0.00212309	0.00127	0.0133157	0.00756322	0.00102144	0.00140054	0.120181	0.0811743		246	-0.00052	0	-0.00405	0	-0.00111	0	-0.00427	0	-0.00355	0	0.001516	0	-0.00047	0
246.2	0.0015924	0.00107552	0.00546887	0.00274473	0.0316553	0.021262	0.22158	0.195313	0.0843977	0.065446	0.00051952	0.001303	0.0113815	0.0063116		246.2	0.313097	0.297158	0.035707	0.0211957	0.00234901	0.00170513	0.00122707	0.00130851	0.0127061	0.00778964	0.00096148	0.00144297	0.121474	0.0833551		246.2	-0.00037	0	-0.00388	0	-0.00122	0	-0.0043	0	-0.00331	0	0.001669	0	-0.0004	0
246.4	0.00168031	0.00111018	0.00618583	0.00283312	0.0323677	0.0219406	0.227355	0.201061	0.086293	0.0674933	0.00082928	0.00134499	0.0120821	0.00651439		246.4	0.316479	0.303046	0.0360033	0.0217909	0.0020105	0.0017548	0.00019342	0.00134679	0.0127248	0.00801451	0.00044258	0.00148514	0.122692	0.0855068		246.4	-7.1e-05	0	-0.00402	0	-0.0016	0	-0.0047	0	-0.00325	0	0.001329	0	-0.00091	0
246.6	0.00171523	0.00114485	0.00632014	0.00292149	0.0337863	0.0226187	0.232811	0.206777	0.0880222	0.0695366	0.00076857	0.00138697	0.0128346	0.00671713		246.6	0.320076	0.308769	0.036167	0.0223811	0.00276603	0.00180417	8.289e-05	0.00138483	0.0129477	0.00823786	0.0004673	0.00152705	0.124223	0.0876296		246.6	0.000535	0	-0.0037	0	-0.00142	0	-0.0044	0	-0.00282	0	0.00099	0	2.13e-05	0
246.8	0.00166986	0.00117951	0.00679143	0.00300985	0.0346709	0.0232964	0.238363	0.212461	0.0893114	0.071576	0.00072866	0.00142896	0.0131537	0.00691981		246.8	0.323895	0.314332	0.0368574	0.0229663	0.00315089	0.00185323	4.46e-06	0.00142265	0.0137326	0.00845969	0.00109753	0.00156871	0.12579	0.0897241		246.8	0.00043	0	-0.00425	0	-0.00179	0	-0.00499	0	-0.00281	0	0.000829	0	0.000152	0
247	0.00165115	0.00121417	0.00764253	0.00309821	0.0357907	0.0239737	0.244725	0.218112	0.090983	0.0736116	0.00070645	0.00147094	0.0137488	0.00712245		247	0.326763	0.319738	0.036592	0.0235465	0.00243758	0.00190198	-0.00062476	0.00146025	0.013106	0.00868001	5.235e-05	0.00161011	0.126634	0.0917905		247	0.000156	0	-0.00448	0	-0.00222	0	-0.00526	0	-0.0031	0	0.000906	0	-0.00017	0
247.2	0.001717	0.00124883	0.00789427	0.00318655	0.036563	0.0246505	0.249658	0.223731	0.093075	0.0756432	0.00082594	0.00151291	0.0137897	0.00732504		247.2	0.329544	0.324993	0.0364043	0.0241219	0.00181111	0.00195043	-0.00136319	0.00149761	0.0127171	0.00889883	-0.00100083	0.00165127	0.127213	0.0938292		247.2	-0.00017	0	-0.00457	0	-0.00236	0	-0.00525	0	-0.00333	0	0.000994	0	-0.00027	0
247.4	0.00173911	0.00128349	0.0078817	0.00327489	0.0370262	0.0253268	0.254993	0.229319	0.094942	0.077671	0.00072029	0.00155489	0.0137537	0.00752758		247.4	0.33285	0.3301	0.0373912	0.0246924	0.00170934	0.00199858	-0.0007983	0.00153476	0.0130545	0.00911616	-0.00125963	0.00169217	0.128636	0.0958407		247.4	-0.00018	0	-0.00434	0	-0.00195	0	-0.00552	0	-0.00336	0	0.000874	0	-3e-06	0
247.6	0.00174743	0.00131815	0.00779411	0.00336321	0.0380974	0.0260027	0.260481	0.234876	0.0965338	0.0796949	0.00061299	0.00159686	0.0141882	0.00773007		247.6	0.337153	0.335064	0.0385289	0.0252581	0.00215702	0.00204642	-0.00051728	0.00157167	0.0139589	0.00933202	-0.00043894	0.00173283	0.130475	0.0978252		247.6	-0.00041	0	-0.00472	0	-0.00177	0	-0.0058	0	-0.00357	0	0.000365	0	-9e-05	0
247.8	0.00183146	0.0013528	0.00778872	0.00345153	0.0387248	0.0266782	0.265827	0.240401	0.0986256	0.0817149	0.00032864	0.00163883	0.0146465	0.0079325		247.8	0.340503	0.339889	0.0397068	0.0258189	0.00236123	0.00209396	-6.613e-05	0.00160837	0.014244	0.00954641	-0.00050173	0.00177324	0.132306	0.0997831		247.8	-0.00052	0	-0.00486	0	-0.00165	0	-0.00577	0	-0.00441	0	1.71e-05	0	0.000107	0
248	0.0022181	0.00138746	0.00759757	0.00353983	0.0392025	0.0273532	0.270649	0.245894	0.100411	0.0837311	0.00012497	0.0016808	0.0148631	0.00813489		248	0.343513	0.344578	0.0410214	0.0263751	0.00222797	0.00214121	-0.00018239	0.00164485	0.0148481	0.00975934	7.635e-05	0.00181341	0.133912	0.101715		248	-0.00103	0	-0.00524	0	-0.00226	0	-0.006	0	-0.00453	0	2.23e-05	0	-0.00013	0
248.2	0.00171389	0.00142211	0.00738142	0.00362813	0.0390802	0.0280277	0.275875	0.251357	0.102233	0.0857434	-0.00028656	0.00172277	0.0146358	0.00833722		248.2	0.346504	0.349136	0.0413391	0.0269265	0.00208602	0.00218817	0.00031011	0.00168111	0.0150191	0.00997082	0.00043841	0.00185333	0.135007	0.103621		248.2	-0.00114	0	-0.00508	0	-0.00226	0	-0.00643	0	-0.00495	0	-0.0005	0	-0.00022	0
248.4	0.00147116	0.00145676	0.00669374	0.00371642	0.0392733	0.0287019	0.280423	0.256789	0.103775	0.0877518	-0.00067967	0.00176473	0.014201	0.00853951		248.4	0.350171	0.353566	0.0424221	0.0274733	0.0020723	0.00223483	0.00076198	0.00171715	0.0151885	0.0101809	0.00037371	0.00189301	0.136615	0.105501		248.4	-0.00159	0	-0.00518	0	-0.0019	0	-0.00663	0	-0.00558	0	-0.00048	0	9.48e-05	0
248.6	0.00142049	0.00149141	0.00605871	0.00380469	0.0390911	0.0293755	0.285035	0.262191	0.105709	0.0897565	-0.0011223	0.00180669	0.0140604	0.00874174		248.6	0.352785	0.357872	0.0430507	0.0280155	0.00183097	0.00228119	0.00100723	0.00175297	0.0154401	0.0103895	-6.178e-05	0.00193245	0.137616	0.107356		248.6	-0.00113	0	-0.00521	0	-0.00079	0	-0.00601	0	-0.00504	0	0.000151	0	0.000589	0
248.8	0.00128782	0.00152605	0.00611023	0.00389296	0.0397423	0.0300487	0.289879	0.267562	0.1083	0.0917572	-0.00103836	0.00184864	0.0139783	0.00894393		248.8	0.35587	0.362057	0.0434553	0.0285531	0.00189269	0.00232727	0.00173242	0.00178858	0.0157704	0.0105967	-0.00044779	0.00197165	0.139311	0.109187		248.8	-0.00148	0	-0.00565	0	-0.00064	0	-0.00627	0	-0.00533	0	2.67e-05	0	0.000233	0
249	0.00122811	0.0015607	0.00613786	0.00398122	0.0401169	0.0307215	0.294794	0.272902	0.110248	0.0937542	-0.00126372	0.0018906	0.0134641	0.00914606		249	0.358348	0.366125	0.0433881	0.0290862	0.00140198	0.00237306	0.00153548	0.00182398	0.0159816	0.0108025	-0.00093904	0.00201061	0.140482	0.110993		249	-0.00164	0	-0.00599	0	-0.00024	0	-0.00603	0	-0.00522	0	0.000296	0	-0.00036	0
249.2	0.00124307	0.00159534	0.00623034	0.00406946	0.0410634	0.0313938	0.300324	0.278213	0.112148	0.0957474	-0.00095272	0.00193255	0.0137695	0.00934815		249.2	0.361052	0.370079	0.0440971	0.0296147	0.00136484	0.00241857	0.00193047	0.00185916	0.0161557	0.0110069	-0.00062689	0.00204933	0.142043	0.112774		249.2	-0.00208	0	-0.00602	0	-9.4e-05	0	-0.00599	0	-0.0047	0	0.000294	0	-6.6e-05	0
249.4	0.00075424	0.00162998	0.00608178	0.0041577	0.0417337	0.0320657	0.305406	0.283493	0.113742	0.0977367	-0.00129589	0.0019745	0.0132755	0.00955018		249.4	0.364361	0.373921	0.0443905	0.0301388	0.00166983	0.00246379	0.00275497	0.00189413	0.0169331	0.0112099	-0.000113	0.00208782	0.143611	0.114532		249.4	-0.00161	0	-0.00573	0	-4.5e-05	0	-0.00564	0	-0.00463	0	0.000816	0	0.000337	0
249.6	3.883e-05	0.00166462	0.0061157	0.00424593	0.0416647	0.0327371	0.310568	0.288744	0.116059	0.0997223	-0.0015956	0.00201644	0.0129288	0.00975217		249.6	0.366984	0.377656	0.0450945	0.0306584	0.00194309	0.00250872	0.00352755	0.0019289	0.0173389	0.0114115	0.00066945	0.00212608	0.145108	0.116266		249.6	-0.00226	0	-0.00631	0	-0.0007	0	-0.00592	0	-0.00462	0	2.07e-05	0	-0.00048	0
249.8	-0.00030218	0.00169926	0.00585145	0.00433414	0.0418599	0.0334081	0.3151	0.293966	0.117845	0.101704	-0.00219263	0.00205839	0.0127895	0.0099541		249.8	0.369658	0.381286	0.045405	0.0311737	0.00238612	0.00255338	0.00355134	0.00196345	0.0180716	0.0116117	0.00151101	0.00216411	0.146667	0.117978		249.8	-0.00213	0	-0.0065	0	-0.00079	0	-0.00568	0	-0.00455	0	-0.0002	0	-0.00074	0
250	0.00032292	0.0017339	0.00585518	0.00442235	0.0425605	0.0340786	0.320148	0.299157	0.120617	0.103682	-0.00157116	0.00210033	0.0131487	0.010156		250	0.371768	0.384815	0.0455264	0.0316846	0.00228322	0.00259776	0.00235666	0.0019978	0.0179252	0.0118106	0.00181654	0.0022019	0.148015	0.119666		250	-0.00218	0	-0.00686	0	-0.00085	0	-0.00571	0	-0.00398	0	-0.00025	0	-0.00071	0
250.2	0.00110772	0.00176853	0.00665832	0.00451055	0.0437847	0.0347487	0.326112	0.30432	0.12308	0.105656	-0.00059804	0.00214226	0.0138529	0.0103578		250.2	0.373928	0.388244	0.0453455	0.0321912	0.00260091	0.00264186	0.0014507	0.00203194	0.0174903	0.0120082	0.00206557	0.00223947	0.14891	0.121331		250.2	-0.00173	0	-0.00685	0	-0.00091	0	-0.00564	0	-0.00345	0	-0.00037	0	-0.0005	0
250.4	0.00177887	0.00180317	0.00764047	0.00459874	0.0452964	0.0354183	0.331936	0.309453	0.125162	0.107627	0.00028489	0.0021842	0.0149869	0.0105596		250.4	0.376677	0.391577	0.0455751	0.0326935	0.00313843	0.00268568	0.0016492	0.00206587	0.0182243	0.0122044	0.00238342	0.00227681	0.150177	0.122975		250.4	-0.00189	0	-0.00676	0	-0.0009	0	-0.00579	0	-0.00321	0	-0.00026	0	-0.00037	0
250.6	0.00242513	0.0018378	0.00844728	0.00468692	0.0469008	0.0360875	0.337696	0.314558	0.127257	0.109593	0.00111973	0.00222613	0.01591	0.0107613		250.6	0.379122	0.394817	0.0459627	0.0331916	0.00372366	0.00272923	0.00198972	0.0020996	0.0182306	0.0123992	0.00309264	0.00231392	0.151596	0.124596		250.6	-0.00108	0	-0.00625	0	-0.00109	0	-0.0057	0	-0.00261	0	7.2e-05	0	-0.00034	0
250.8	0.00300099	0.00187243	0.0093375	0.00477509	0.0482405	0.0367563	0.343409	0.319633	0.128721	0.111556	0.00181396	0.00226806	0.0161425	0.010963		250.8	0.381223	0.397966	0.0461083	0.0336854	0.00326648	0.00277251	0.00169225	0.00213313	0.0183019	0.0125927	0.0032113	0.0023508	0.152292	0.126195		250.8	-0.00089	0	-0.0066	0	-0.00134	0	-0.00643	0	-0.00271	0	0.000239	0	-0.00066	0
251	0.00333489	0.00190706	0.00994109	0.00486325	0.0493606	0.0374246	0.348918	0.32468	0.130629	0.113515	0.00234233	0.00230999	0.0165578	0.0111646		251	0.382822	0.401026	0.0459662	0.0341751	0.00302032	0.00281552	0.00179183	0.00216646	0.0181155	0.012785	0.00275516	0.00238747	0.152666	0.127774		251	-0.00045	0	-0.00642	0	-0.0016	0	-0.0065	0	-0.00281	0	0.000548	0	-0.00049	0
251.2	0.00399091	0.00194168	0.0105779	0.0049514	0.0512986	0.0380924	0.353934	0.329699	0.13336	0.115471	0.00315871	0.00235191	0.0175599	0.0113662		251.2	0.384352	0.404001	0.045748	0.0346607	0.00268012	0.00285826	0.0017785	0.00219958	0.0177063	0.0129759	0.00243165	0.00242391	0.152997	0.129331		251.2	0.000201	0	-0.00607	0	-0.00118	0	-0.00684	0	-0.00295	0	0.000726	0	5.48e-05	0
251.4	0.00415833	0.00197631	0.0105551	0.00503954	0.0520003	0.0387599	0.359078	0.334689	0.135722	0.117422	0.00312193	0.00239383	0.0176133	0.0115678		251.4	0.387151	0.406892	0.0466107	0.0351421	0.00263741	0.00290073	0.00242696	0.00223251	0.0178595	0.0131655	0.003028	0.00246013	0.154762	0.130867		251.4	0.000118	0	-0.00579	0	-0.00121	0	-0.00704	0	-0.0029	0	0.000663	0	0.000331	0
251.6	0.00410627	0.00201093	0.0106483	0.00512767	0.0526474	0.0394268	0.364058	0.339651	0.137562	0.11937	0.00332213	0.00243575	0.0182389	0.0117692		251.6	0.38957	0.409702	0.0470533	0.0356195	0.00281937	0.00294294	0.00240677	0.00226524	0.0177611	0.0133538	0.00302132	0.00249613	0.155965	0.132383		251.6	0.000471	0	-0.00515	0	-0.00125	0	-0.00695	0	-0.00304	0	0.000663	0	0.000313	0
251.8	0.00366957	0.00204555	0.0102161	0.00521579	0.0523223	0.0400934	0.368162	0.344586	0.139161	0.121315	0.00301575	0.00247767	0.018012	0.0119707		251.8	0.390934	0.412434	0.0472293	0.0360928	0.00255238	0.00298489	0.0021907	0.00229778	0.0173785	0.0135409	0.00208412	0.00253191	0.15653	0.133878		251.8	-0.00024	0	-0.00548	0	-0.00196	0	-0.00763	0	-0.00383	0	0.000391	0	-6.2e-05	0
252	0.00362888	0.00208017	0.00968099	0.0053039	0.0523861	0.0407595	0.372368	0.349492	0.140967	0.123255	0.00303059	0.00251958	0.0182909	0.0121721		252	0.392987	0.415088	0.0481516	0.0365622	0.00271174	0.00302657	0.00267158	0.00233012	0.0176555	0.0137266	0.0023922	0.00256747	0.157542	0.135353		252	-0.00055	0	-0.00567	0	-0.0029	0	-0.00839	0	-0.0041	0	6.89e-05	0	-0.00059	0
252.2	0.00276892	0.00211479	0.00892415	0.005392	0.051809	0.0414251	0.376281	0.354371	0.141927	0.125192	0.00250296	0.00256149	0.0177325	0.0123734		252.2	0.394999	0.417669	0.0480055	0.0370275	0.00245471	0.00306799	0.00318944	0.00236226	0.0173886	0.0139112	0.00201807	0.00260282	0.158259	0.136809		252.2	-0.00035	0	-0.00565	0	-0.00315	0	-0.00882	0	-0.00398	0	-0.00057	0	-0.00028	0
252.4	0.00231547	0.00214941	0.00866954	0.00548009	0.0520345	0.0420903	0.380128	0.359222	0.143524	0.127125	0.00225621	0.0026034	0.017784	0.0125747		252.4	0.397621	0.420176	0.0487802	0.037489	0.00291202	0.00310915	0.00409393	0.00239421	0.0178907	0.0140944	0.00236344	0.00263795	0.159747	0.138245		252.4	-0.00052	0	-0.00585	0	-0.00339	0	-0.0088	0	-0.00404	0	-0.00052	0	-0.00023	0
252.6	0.00292091	0.00218402	0.00870765	0.00556817	0.0523509	0.0427551	0.384612	0.364046	0.145314	0.129054	0.00266077	0.00264531	0.0181476	0.0127759		252.6	0.398968	0.422614	0.0487988	0.0379465	0.00248328	0.00315006	0.00393643	0.00242597	0.0176897	0.0142764	0.00173521	0.00267288	0.16021	0.139662		252.6	-0.00022	0	-0.00605	0	-0.00387	0	-0.00872	0	-0.00428	0	-0.00054	0	-0.0007	0
252.8	0.00303195	0.00221863	0.00887022	0.00565624	0.052858	0.0434194	0.388923	0.368842	0.147215	0.13098	0.00277499	0.00268721	0.0182073	0.0129771		252.8	0.400645	0.424983	0.04869	0.0384002	0.00215983	0.00319071	0.0039145	0.00245754	0.0176046	0.0144572	0.00132002	0.00270758	0.160967	0.14106		252.8	0.000451	0	-0.00535	0	-0.0036	0	-0.00794	0	-0.00415	0	-5.5e-05	0	-0.00044	0
253	0.00325837	0.00225324	0.00909595	0.00574431	0.0532706	0.0440833	0.393238	0.373612	0.148843	0.132902	0.00235657	0.00272911	0.0184492	0.0131782		253	0.402211	0.427286	0.0487089	0.03885	0.00210788	0.0032311	0.00380308	0.00248892	0.0177002	0.0146367	0.00096704	0.00274208	0.161617	0.142439		253	0.000371	0	-0.00564	0	-0.00378	0	-0.00774	0	-0.00425	0	0.000194	0	-0.00047	0
253.2	0.00293469	0.00228785	0.008732	0.00583236	0.0537578	0.0447467	0.397431	0.378354	0.150178	0.134821	0.00191707	0.00277101	0.018418	0.0133793		253.2	0.403901	0.429524	0.0491586	0.0392961	0.00245128	0.00327124	0.00397262	0.00252011	0.0179317	0.014815	0.00129974	0.00277637	0.16252	0.1438		253.2	0.000766	0	-0.00485	0	-0.0034	0	-0.00749	0	-0.00383	0	0.000161	0	0.000222	0
253.4	0.00196571	0.00232246	0.00846631	0.0059204	0.0536273	0.0454097	0.401434	0.38307	0.151764	0.136735	0.00074251	0.0028129	0.0177378	0.0135803		253.4	0.405819	0.431699	0.0495132	0.0397384	0.00232113	0.00331114	0.00410839	0.00255112	0.0184209	0.0149922	0.00169818	0.00281046	0.163575	0.145142		253.4	0.001044	0	-0.00452	0	-0.00296	0	-0.00676	0	-0.00382	0	0.000285	0	0.000243	0
253.6	0.00219677	0.00235707	0.00858147	0.00600843	0.0540862	0.0460723	0.406058	0.38776	0.154056	0.138646	0.00057454	0.00285479	0.0183334	0.0137813		253.6	0.407377	0.433814	0.0498993	0.0401769	0.00262296	0.00335078	0.00422022	0.00258194	0.0188114	0.0151681	0.00199907	0.00284433	0.165145	0.146467		253.6	0.000386	0	-0.00498	0	-0.00286	0	-0.00673	0	-0.00389	0	-0.00046	0	-0.0002	0
253.8	0.00250742	0.00239167	0.00836558	0.00609646	0.0546869	0.0467344	0.410417	0.392423	0.155689	0.140554	0.00051459	0.00289668	0.0187085	0.0139822		253.8	0.409322	0.435869	0.0501998	0.0406118	0.00306417	0.00339018	0.00347032	0.00261257	0.0190772	0.0153428	0.00211423	0.002878	0.165978	0.147774		253.8	0.000803	0	-0.00447	0	-0.0018	0	-0.00624	0	-0.00345	0	-0.00011	0	5.7e-05	0
254	0.002956	0.00242628	0.00856637	0.00618447	0.0551261	0.0473961	0.415661	0.397059	0.157929	0.142457	0.00096839	0.00293857	0.0190954	0.0141831		254	0.410712	0.437866	0.0502441	0.0410429	0.00296347	0.00342932	0.0017183	0.00264302	0.0186448	0.0155163	0.00163362	0.00291147	0.166684	0.149063		254	0.000475	0	-0.00421	0	-0.00162	0	-0.00537	0	-0.00279	0	0.000661	0	0.000454	0
254.2	0.00295498	0.00246088	0.00916495	0.00627247	0.0562617	0.0480573	0.420479	0.40167	0.159492	0.144358	0.00121079	0.00298045	0.0195963	0.0143839		254.2	0.412041	0.439807	0.0505672	0.0414704	0.00265829	0.00346823	0.00099864	0.00267328	0.0182546	0.0156886	0.00134219	0.00294473	0.167031	0.150335		254.2	0.000493	0	-0.00456	0	-0.0017	0	-0.0049	0	-0.00293	0	0.000499	0	0.000181	0
254.4	0.00297932	0.00249548	0.00936243	0.00636047	0.0572974	0.0487181	0.424587	0.406254	0.160866	0.146254	0.00095308	0.00302234	0.0198201	0.0145847		254.4	0.413158	0.441694	0.0507865	0.0418943	0.00218798	0.00350689	0.00058566	0.00270337	0.0189308	0.0158598	0.00098423	0.00297779	0.167621	0.15159		254.4	9.27e-05	0	-0.00411	0	-0.00125	0	-0.00464	0	-0.00305	0	0.00073	0	0.000149	0
254.6	0.00281775	0.00253007	0.00954231	0.00644845	0.0576946	0.0493785	0.428958	0.410813	0.162235	0.148147	0.00065629	0.00306421	0.0201522	0.0147854		254.6	0.414485	0.443528	0.0510974	0.0423147	0.00218117	0.00354531	-7.535e-05	0.00273327	0.0188062	0.0160298	0.00081269	0.00301065	0.168205	0.152828		254.6	0.000383	0	-0.00441	0	-0.00115	0	-0.0049	0	-0.0028	0	0.001068	0	-4.7e-06	0
254.8	0.00269393	0.00256467	0.00955358	0.00653643	0.0584465	0.0500384	0.433136	0.415346	0.163837	0.150036	0.00069141	0.00310609	0.0199027	0.0149861		254.8	0.415568	0.445311	0.0509043	0.0427314	0.00164894	0.00358349	-0.00081258	0.002763	0.0190074	0.0161987	0.00010607	0.00304331	0.168806	0.15405		254.8	0.000245	0	-0.00457	0	-0.00074	0	-0.00533	0	-0.00286	0	0.001125	0	-0.00045	0
255	0.0029208	0.00259926	0.00921614	0.00662439	0.0596329	0.0506979	0.437111	0.419853	0.166578	0.151922	0.00055734	0.00314796	0.020577	0.0151868		255	0.417005	0.447043	0.0513622	0.0431447	0.00184874	0.00362143	-0.00078798	0.00279254	0.019187	0.0163664	0.00032057	0.00307577	0.169887	0.155255		255	0.000453	0	-0.00425	0	-0.00051	0	-0.00511	0	-0.00295	0	0.001468	0	-0.00046	0
255.2	0.00325775	0.00263386	0.00940472	0.00671235	0.0609711	0.0513569	0.441547	0.424335	0.169155	0.153804	0.00078633	0.00318983	0.0213036	0.0153873		255.2	0.418191	0.448727	0.0515528	0.0435544	0.00135834	0.00365914	-0.00122784	0.00282191	0.0189134	0.0165329	-0.0003632	0.00310804	0.170177	0.156444		255.2	-2.5e-05	0	-0.00423	0	-0.00046	0	-0.00574	0	-0.00351	0	0.001428	0	-0.00087	0
255.4	0.00310396	0.00266845	0.0092214	0.00680029	0.0608605	0.0520155	0.446023	0.428792	0.171376	0.155682	0.00086301	0.0032317	0.021144	0.0155879		255.4	0.419414	0.450364	0.0521953	0.0439607	0.00141219	0.00369661	-0.00142645	0.0028511	0.0186106	0.0166984	-0.00064662	0.00314011	0.171219	0.157618		255.4	-0.00047	0	-0.00445	0	-0.00059	0	-0.00597	0	-0.00345	0	0.001342	0	-0.00129	0
255.6	0.00294138	0.00270304	0.00933273	0.00688823	0.0608903	0.0526737	0.450052	0.433223	0.17314	0.157557	0.00077014	0.00327357	0.0212607	0.0157883		255.6	0.420519	0.451955	0.0526609	0.0443636	0.00172117	0.00373384	-0.00141882	0.00288012	0.0188257	0.0168627	-0.00090352	0.00317199	0.17201	0.158775		255.6	-0.00067	0	-0.00478	0	-0.00069	0	-0.00621	0	-0.00316	0	0.000772	0	-0.00187	0
255.8	0.0033691	0.00273762	0.0097576	0.00697616	0.0617412	0.0533314	0.454449	0.43763	0.175164	0.159428	0.00074754	0.00331543	0.0215102	0.0159888		255.8	0.421341	0.453501	0.0526649	0.0447631	0.00181051	0.00377084	-0.0014865	0.00290896	0.0187071	0.0170258	-0.00091388	0.00320367	0.172728	0.159917		255.8	-0.00165	0	-0.00583	0	-0.0014	0	-0.00711	0	-0.00378	0	-0.00052	0	-0.00238	0
256	0.00346171	0.00277221	0.00992645	0.00706407	0.0626278	0.0539887	0.459182	0.442011	0.177414	0.161296	0.00147879	0.00335729	0.0220354	0.0161892		256	0.422734	0.455004	0.0534967	0.0451591	0.00210177	0.00380761	-0.00063796	0.00293763	0.0191651	0.0171879	-0.00010303	0.00323516	0.174188	0.161044		256	-0.00171	0	-0.00632	0	-0.00204	0	-0.00789	0	-0.00347	0	-0.00119	0	-0.00225	0
256.2	0.00306967	0.00280679	0.00980932	0.00715198	0.0629735	0.0546456	0.46315	0.446368	0.179063	0.16316	0.00137394	0.00339915	0.0218131	0.0163895		256.2	0.424423	0.456465	0.0537014	0.0455519	0.00222585	0.00384415	-0.00028875	0.00296613	0.0192423	0.0173489	-0.00020195	0.00326646	0.175201	0.162156		256.2	-0.00196	0	-0.00655	0	-0.00217	0	-0.00801	0	-0.00339	0	-0.00214	0	-0.00255	0
256.4	0.00301832	0.00284138	0.0100356	0.00723988	0.0634914	0.055302	0.467442	0.450701	0.180964	0.165021	0.00152763	0.003441	0.0223625	0.0165898		256.4	0.42622	0.457884	0.0543795	0.0459413	0.0030301	0.00388047	0.00059853	0.00299446	0.0201906	0.0175088	0.00017247	0.00329757	0.176378	0.163253		256.4	-0.00157	0	-0.00645	0	-0.00215	0	-0.00764	0	-0.00374	0	-0.00203	0	-0.00272	0
256.6	0.00414464	0.00287596	0.0105219	0.00732776	0.0646301	0.055958	0.472349	0.455009	0.183389	0.166878	0.00179655	0.00348285	0.0227708	0.01679		256.6	0.427391	0.459264	0.0547174	0.0463274	0.00333141	0.00391655	0.00079675	0.00302261	0.0203184	0.0176676	0.00010964	0.00332849	0.177005	0.164335		256.6	-0.00116	0	-0.00662	0	-0.00233	0	-0.00777	0	-0.00372	0	-0.00206	0	-0.0027	0
256.8	0.00431756	0.00291054	0.0110164	0.00741564	0.0657445	0.0566135	0.476776	0.459292	0.185482	0.168731	0.0019662	0.0035247	0.0231811	0.0169902		256.8	0.429353	0.460605	0.0554766	0.0467103	0.00403426	0.00395241	0.00150981	0.0030506	0.0209918	0.0178253	0.00054009	0.00335922	0.177734	0.165402		256.8	-0.00082	0	-0.00637	0	-0.00177	0	-0.00738	0	-0.003	0	-0.00167	0	-0.00185	0
257	0.00443673	0.00294511	0.0113918	0.00750351	0.0664316	0.0572686	0.480699	0.463552	0.187387	0.170581	0.00200768	0.00356655	0.0233126	0.0171903		257	0.430861	0.461909	0.0558951	0.0470899	0.00417768	0.00398805	0.00161412	0.00307842	0.0214797	0.0179819	0.00076096	0.00338977	0.178012	0.166456		257	-0.00153	0	-0.00701	0	-0.00213	0	-0.00795	0	-0.00338	0	-0.00196	0	-0.00199	0
257.2	0.00375002	0.00297969	0.0116287	0.00759137	0.0671257	0.0579233	0.484493	0.467787	0.188592	0.172428	0.00204086	0.00360839	0.0232606	0.0173904		257.2	0.432119	0.463176	0.0562909	0.0474663	0.00389899	0.00402346	0.00194841	0.00310607	0.0214312	0.0181375	0.00098113	0.00342013	0.178138	0.167495		257.2	-0.00159	0	-0.00689	0	-0.00199	0	-0.00807	0	-0.00335	0	-0.00226	0	-0.0015	0
257.4	0.00366592	0.00301426	0.0124144	0.00767922	0.0685304	0.0585775	0.489166	0.471999	0.190792	0.17427	0.00222857	0.00365023	0.0238425	0.0175904		257.4	0.43407	0.464407	0.0570764	0.0478396	0.00434431	0.00405866	0.00298463	0.00313356	0.0220825	0.018292	0.00196443	0.00345031	0.179173	0.16852		257.4	-0.00181	0	-0.00719	0	-0.00179	0	-0.00762	0	-0.00372	0	-0.00215	0	-0.00123	0
257.6	0.0039056	0.00304884	0.0123989	0.00776705	0.0694436	0.0592314	0.493498	0.476187	0.192825	0.17611	0.00266081	0.00369207	0.0243848	0.0177904		257.6	0.435934	0.465604	0.0577683	0.0482097	0.00498758	0.00409363	0.00362937	0.00316088	0.0226795	0.0184455	0.00263314	0.0034803	0.180132	0.169532		257.6	-0.0026	0	-0.00761	0	-0.00235	0	-0.00797	0	-0.00437	0	-0.00247	0	-0.00124	0
257.8	0.0044216	0.00308341	0.0130476	0.00785488	0.0705739	0.0598847	0.497977	0.480351	0.195024	0.177946	0.00360105	0.00373391	0.0248631	0.0179903		257.8	0.437432	0.466768	0.0581061	0.0485766	0.00499503	0.00412838	0.00322261	0.00318804	0.0227786	0.0185979	0.00280808	0.00351012	0.180141	0.17053		257.8	-0.00307	0	-0.00749	0	-0.00228	0	-0.00766	0	-0.00438	0	-0.00213	0	-0.00112	0
258	0.00442429	0.00311798	0.0135155	0.0079427	0.0713977	0.0605377	0.50217	0.484492	0.196979	0.179778	0.00353121	0.00377574	0.0253669	0.0181902		258	0.438157	0.467898	0.0582397	0.0489405	0.00460275	0.00416292	0.00278616	0.00321503	0.0224416	0.0187493	0.00241094	0.00353975	0.180067	0.171515		258	-0.00349	0	-0.00762	0	-0.00286	0	-0.00712	0	-0.00452	0	-0.00191	0	-0.00126	0
258.2	0.00468773	0.00315254	0.0139413	0.00803051	0.0723955	0.0611902	0.506095	0.488609	0.198789	0.181607	0.00359916	0.00381757	0.0255466	0.0183901		258.2	0.439699	0.468997	0.0587085	0.0493013	0.00468086	0.00419724	0.00320001	0.00324187	0.0223588	0.0188997	0.00290035	0.0035692	0.180983	0.172486		258.2	-0.00343	0	-0.00804	0	-0.00281	0	-0.00678	0	-0.00479	0	-0.00165	0	-0.00121	0
258.4	0.00445284	0.00318711	0.0133314	0.00811831	0.0726913	0.0618422	0.509242	0.492704	0.199994	0.183432	0.00322225	0.0038594	0.0253418	0.0185898		258.4	0.440553	0.470065	0.0583919	0.049659	0.00464354	0.00423135	0.0026343	0.00326854	0.0223813	0.019049	0.00262248	0.00359848	0.181282	0.173445		258.4	-0.00327	0	-0.00759	0	-0.0027	0	-0.00638	0	-0.0044	0	-0.00096	0	-0.00083	0
258.6	0.0040815	0.00322167	0.0130914	0.0082061	0.0727109	0.0624939	0.51273	0.496775	0.201357	0.185254	0.00319665	0.00390122	0.0256235	0.0187896		258.6	0.441475	0.471104	0.0586778	0.0500138	0.00505246	0.00426524	0.00287812	0.00329505	0.0225398	0.0191973	0.00264043	0.00362757	0.182174	0.17439		258.6	-0.0028	0	-0.0074	0	-0.00226	0	-0.00621	0	-0.00421	0	-7.8e-05	0	-0.00053	0
258.8	0.00401488	0.00325624	0.0127576	0.00829388	0.0732521	0.0631451	0.515965	0.500823	0.202662	0.187072	0.0034202	0.00394304	0.0251275	0.0189892		258.8	0.4422	0.472113	0.0588551	0.0503655	0.00504398	0.00429892	0.00310501	0.0033214	0.0224904	0.0193447	0.00278353	0.00365649	0.183011	0.175323		258.8	-0.00199	0	-0.0071	0	-0.0023	0	-0.00589	0	-0.00385	0	0.000237	0	-0.00101	0
259	0.00499948	0.0032908	0.0126745	0.00838165	0.0741237	0.0637959	0.519651	0.504848	0.204433	0.188887	0.00348008	0.00398486	0.0257123	0.0191889		259	0.443134	0.473093	0.0595422	0.0507142	0.00530815	0.0043324	0.00344441	0.0033476	0.0221449	0.019491	0.00295134	0.00368524	0.183395	0.176244		259	-0.00166	0	-0.00699	0	-0.0026	0	-0.00514	0	-0.00362	0	0.001028	0	-0.00049	0
259.2	0.00461151	0.00332535	0.0128506	0.00846942	0.074243	0.0644462	0.523702	0.508851	0.205631	0.190698	0.00373184	0.00402668	0.0255716	0.0193885		259.2	0.443027	0.474047	0.0595152	0.05106	0.00463089	0.00436566	0.00290061	0.00337363	0.0211136	0.0196363	0.00166754	0.00371381	0.183069	0.177152		259.2	-0.00128	0	-0.00701	0	-0.00269	0	-0.00508	0	-0.00354	0	0.001323	0	-0.00051	0
259.4	0.00481911	0.00335991	0.013011	0.00855717	0.0742056	0.0650961	0.527386	0.512831	0.206781	0.192506	0.00388168	0.00406849	0.0253641	0.019588		259.4	0.442854	0.474973	0.0597093	0.0514029	0.00449339	0.00439871	0.00233493	0.00339951	0.0202588	0.0197806	0.00114643	0.0037422	0.183682	0.178048		259.4	-0.00111	0	-0.00748	0	-0.00273	0	-0.00473	0	-0.00346	0	0.001343	0	-0.00052	0
259.6	0.00505727	0.00339447	0.0135592	0.00864491	0.0746535	0.0657456	0.531379	0.516789	0.208525	0.194311	0.00361614	0.00411031	0.0254303	0.0197875		259.6	0.443813	0.475874	0.0600502	0.0517429	0.00451056	0.00443156	0.00216978	0.00342524	0.020615	0.019924	0.00145303	0.00377043	0.184795	0.178932		259.6	-0.00092	0	-0.00759	0	-0.00317	0	-0.00495	0	-0.00319	0	0.001169	0	-0.00053	0
259.8	0.00510252	0.00342902	0.014146	0.00873264	0.075431	0.0663946	0.535212	0.520724	0.210324	0.196112	0.00392519	0.00415212	0.0257835	0.0199869		259.8	0.444019	0.476749	0.0599005	0.05208	0.00440367	0.0044642	0.00190467	0.00345081	0.0204006	0.0200664	0.00117043	0.00379848	0.185001	0.179804		259.8	-0.00074	0	-0.00796	0	-0.00337	0	-0.00528	0	-0.00343	0	0.000474	0	-0.00074	0
260	0.00437259	0.00346357	0.0136407	0.00882036	0.075255	0.0670432	0.538694	0.524637	0.211695	0.19791	0.00381674	0.00419392	0.0256911	0.0201863		260	0.444771	0.4776	0.060435	0.0524143	0.00451868	0.00449664	0.00197537	0.00347622	0.0206342	0.0202078	0.00123606	0.00382636	0.185663	0.180665		260	-9.3e-05	0	-0.00782	0	-0.00348	0	-0.00558	0	-0.00329	0	0.000772	0	-0.0009	0
260.2	0.00375197	0.00349812	0.0129066	0.00890808	0.0753652	0.0676914	0.541987	0.528528	0.212879	0.199704	0.0030266	0.00423572	0.0254831	0.0203856		260.2	0.445482	0.478427	0.0603067	0.0527457	0.00434996	0.00452888	0.00174313	0.00350149	0.0206344	0.0203482	0.00075225	0.00385408	0.185883	0.181514		260.2	0.000204	0	-0.00743	0	-0.00286	0	-0.00499	0	-0.00365	0	0.000256	0	-0.00086	0
260.4	0.00326168	0.00353267	0.0131262	0.00899578	0.0755272	0.0683392	0.546041	0.532397	0.214531	0.201494	0.002798	0.00427753	0.0256807	0.0205849		260.4	0.446269	0.47923	0.0604359	0.0530743	0.00462332	0.00456091	0.00191002	0.0035266	0.0212547	0.0204877	0.00076582	0.00388163	0.186305	0.182352		260.4	0.001651	0	-0.0067	0	-0.002	0	-0.00438	0	-0.00356	0	0.000599	0	0.0001	0
260.6	0.00323734	0.00356722	0.0134177	0.00908347	0.0758925	0.0689865	0.54988	0.536245	0.216292	0.203282	0.00245211	0.00431932	0.0256434	0.0207842		260.6	0.44691	0.480012	0.0603671	0.0534002	0.00471491	0.00459275	0.0018922	0.00355156	0.0215712	0.0206262	0.00055602	0.003909	0.186851	0.183178		260.6	0.001776	0	-0.00675	0	-0.00189	0	-0.00436	0	-0.00323	0	0.000437	0	0.000491	0
260.8	0.00296765	0.00360176	0.0134253	0.00917116	0.0765453	0.0696334	0.553859	0.54007	0.217875	0.205066	0.00251116	0.00436112	0.0256949	0.0209834		260.8	0.448084	0.480771	0.0606318	0.0537233	0.00472514	0.00462438	0.00156889	0.00357638	0.0219673	0.0207638	0.00040097	0.00393622	0.187436	0.183993		260.8	0.001799	0	-0.00682	0	-0.00161	0	-0.00453	0	-0.00312	0	0.000439	0	0.000526	0
261	0.00253999	0.00363631	0.0129713	0.00925883	0.0767033	0.0702799	0.557121	0.543874	0.219235	0.206846	0.00232753	0.00440291	0.0257652	0.0211825		261	0.44903	0.481509	0.0605841	0.0540437	0.00496064	0.00465582	0.00132763	0.00360104	0.0222973	0.0209005	0.0001372	0.00396327	0.187549	0.184798		261	0.001418	0	-0.00702	0	-0.00205	0	-0.00475	0	-0.00354	0	-0.00025	0	-7.9e-05	0
261.2	0.00222708	0.00367085	0.0131713	0.0093465	0.0777615	0.0709259	0.561213	0.547657	0.221601	0.208623	0.00258642	0.0044447	0.0261543	0.0213816		261.2	0.450504	0.482226	0.0611821	0.0543613	0.0054954	0.00468706	0.00200292	0.00362555	0.0228712	0.0210362	0.00079265	0.00399015	0.188694	0.185592		261.2	0.001133	0	-0.00694	0	-0.00214	0	-0.00497	0	-0.00394	0	-0.00096	0	-0.00037	0
261.4	0.00247933	0.00370539	0.0133223	0.00943415	0.0786014	0.0715715	0.565511	0.551418	0.223664	0.210397	0.00242517	0.00448649	0.0265512	0.0215806		261.4	0.452115	0.482923	0.0619743	0.0546763	0.00592712	0.00471811	0.00263268	0.00364992	0.0238597	0.021171	0.00162275	0.00401687	0.189941	0.186375		261.4	0.000217	0	-0.00695	0	-0.00198	0	-0.00502	0	-0.00442	0	-0.00116	0	-0.00077	0
261.6	0.00282018	0.00373993	0.013524	0.0095218	0.0790804	0.0722166	0.569802	0.555158	0.22554	0.212167	0.0027872	0.00452827	0.0267216	0.0217796		261.6	0.453095	0.483601	0.0624007	0.0549887	0.00571167	0.00474896	0.00281142	0.00367414	0.0241657	0.0213049	0.00199848	0.00404343	0.190595	0.187147		261.6	-0.00056	0	-0.0069	0	-0.00242	0	-0.00592	0	-0.00486	0	-0.00163	0	-0.00143	0
261.8	0.00319301	0.00377447	0.0137935	0.00960943	0.0799803	0.0728614	0.574225	0.558877	0.227934	0.213934	0.00323224	0.00457005	0.0275423	0.0219785		261.8	0.45373	0.484259	0.0622612	0.0552983	0.00532366	0.00477962	0.00300681	0.00369822	0.0240843	0.0214379	0.00239083	0.00406983	0.190819	0.18791		261.8	-0.00121	0	-0.00694	0	-0.0019	0	-0.00571	0	-0.00478	0	-0.00165	0	-0.00175	0
262	0.00352792	0.003809	0.0142257	0.00969706	0.0805983	0.0735057	0.5783	0.562575	0.23013	0.215698	0.00306605	0.00461183	0.0281396	0.0221774		262	0.454499	0.484899	0.0627693	0.0556054	0.00527348	0.00481009	0.00343684	0.00372215	0.0242656	0.02157	0.00238661	0.00409606	0.191676	0.188662		262	-0.00167	0	-0.00748	0	-0.00209	0	-0.00625	0	-0.00531	0	-0.00232	0	-0.0027	0
262.2	0.00341725	0.00384354	0.0143125	0.00978467	0.08103	0.0741496	0.581783	0.566252	0.231629	0.217458	0.00283971	0.00465361	0.0279069	0.0223763		262.2	0.455936	0.485521	0.063245	0.0559099	0.00569639	0.00484037	0.00415134	0.00374594	0.0249739	0.0217012	0.00340433	0.00412214	0.193568	0.189404		262.2	-0.00184	0	-0.00772	0	-0.00181	0	-0.00611	0	-0.00508	0	-0.00198	0	-0.00266	0
262.4	0.00305188	0.00387807	0.0136083	0.00987228	0.0812569	0.0747931	0.58411	0.569909	0.232497	0.219215	0.00212585	0.00469538	0.0278755	0.0225751		262.4	0.45625	0.486126	0.0631243	0.0562118	0.0052767	0.00487045	0.00403235	0.00376959	0.0248281	0.0218315	0.00354929	0.00414806	0.194276	0.190136		262.4	-0.00212	0	-0.00766	0	-0.00221	0	-0.00639	0	-0.00485	0	-0.00239	0	-0.00302	0
262.6	0.00333547	0.0039126	0.0139787	0.00995988	0.0820106	0.0754361	0.587316	0.573545	0.233709	0.220968	0.00208881	0.00473716	0.0279128	0.0227738		262.6	0.456831	0.486714	0.0638745	0.0565111	0.00566873	0.00490035	0.00488609	0.00379309	0.0256049	0.0219609	0.00409071	0.00417383	0.195233	0.190858		262.6	-0.00248	0	-0.00741	0	-0.00194	0	-0.00619	0	-0.00471	0	-0.00222	0	-0.00288	0
262.8	0.00369938	0.00394713	0.0140841	0.0100475	0.0826837	0.0760787	0.590799	0.57716	0.234995	0.222718	0.00236866	0.00477892	0.0276015	0.0229725		262.8	0.457806	0.487285	0.0643673	0.056808	0.00571354	0.00493007	0.00516521	0.00381645	0.0252548	0.0220894	0.00450917	0.00419943	0.19639	0.191571		262.8	-0.00228	0	-0.00753	0	-0.00216	0	-0.00618	0	-0.00433	0	-0.00223	0	-0.003	0
263	0.0041382	0.00398165	0.0140593	0.010135	0.0837489	0.0767209	0.594181	0.580755	0.236695	0.224465	0.00233121	0.00482069	0.0279209	0.0231711		263	0.458328	0.48784	0.0648704	0.0571023	0.00554177	0.0049596	0.00501959	0.00383967	0.024931	0.0222171	0.00459722	0.00422489	0.196681	0.192274		263	-0.00213	0	-0.00732	0	-0.00244	0	-0.00621	0	-0.00417	0	-0.00192	0	-0.00296	0
263.2	0.0037546	0.00401618	0.0144883	0.0102226	0.0846191	0.0773626	0.597488	0.584329	0.238216	0.226209	0.00281249	0.00486245	0.0280581	0.0233697		263.2	0.458911	0.48838	0.0649267	0.0573941	0.00520081	0.00498894	0.00502326	0.00386276	0.02455	0.0223438	0.0043041	0.00425018	0.197358	0.192967		263.2	-0.00186	0	-0.00743	0	-0.00245	0	-0.00663	0	-0.00438	0	-0.0017	0	-0.00292	0
263.4	0.00425492	0.0040507	0.0149089	0.0103102	0.0853158	0.078004	0.600578	0.587884	0.239793	0.227949	0.00347799	0.00490421	0.0280647	0.0235683		263.4	0.459276	0.488905	0.0648036	0.0576834	0.00521096	0.0050181	0.00488783	0.0038857	0.024573	0.0224698	0.00443172	0.00427533	0.197898	0.193652		263.4	-0.0024	0	-0.00743	0	-0.00246	0	-0.00727	0	-0.00447	0	-0.0015	0	-0.00276	0
263.6	0.00433842	0.00408522	0.0154223	0.0103977	0.0866767	0.0786449	0.604074	0.591418	0.241935	0.229686	0.00380173	0.00494597	0.0283592	0.0237668		263.6	0.460055	0.489414	0.064841	0.0579704	0.00512013	0.00504708	0.00480203	0.00390851	0.0246608	0.0225948	0.0046918	0.00430032	0.198122	0.194327		263.6	-0.0023	0	-0.0074	0	-0.00274	0	-0.00748	0	-0.00433	0	-0.00174	0	-0.00261	0
263.8	0.00429286	0.00411974	0.0155713	0.0104852	0.0875914	0.0792853	0.606947	0.594933	0.243916	0.231419	0.00414288	0.00498773	0.0289448	0.0239652		263.8	0.460703	0.48991	0.0651114	0.0582548	0.00484804	0.00507587	0.0048418	0.00393118	0.024788	0.022719	0.00468492	0.00432516	0.198112	0.194993		263.8	-0.00233	0	-0.00784	0	-0.0027	0	-0.00751	0	-0.00464	0	-0.00242	0	-0.00246	0
264	0.00434127	0.00415426	0.015565	0.0105728	0.0887947	0.0799254	0.610432	0.598427	0.245551	0.233149	0.0042498	0.00502948	0.0291238	0.0241636		264	0.460891	0.490391	0.0650618	0.0585369	0.0047386	0.00510449	0.004591	0.00395371	0.0247108	0.0228424	0.00467398	0.00434985	0.198644	0.19565		264	-0.0019	0	-0.00723	0	-0.00248	0	-0.00732	0	-0.00453	0	-0.00217	0	-0.00189	0
264.2	0.00468833	0.00418878	0.0159674	0.0106603	0.0902427	0.080565	0.613583	0.601902	0.247622	0.234876	0.00478675	0.00507123	0.0295278	0.024362		264.2	0.461162	0.49086	0.0649268	0.0588166	0.00467002	0.00513293	0.00488718	0.00397611	0.024905	0.0229649	0.00430278	0.00437439	0.198724	0.196299		264.2	-0.00156	0	-0.00682	0	-0.00172	0	-0.00675	0	-0.00449	0	-0.00237	0	-0.00112	0
264.4	0.00456298	0.00422329	0.0162444	0.0107478	0.0906209	0.0812042	0.617029	0.605358	0.250095	0.2366	0.00517974	0.00511298	0.0296493	0.0245602		264.4	0.46129	0.491314	0.0650746	0.059094	0.00520294	0.00516119	0.00488018	0.00399837	0.0249596	0.0230866	0.0039224	0.00439878	0.198743	0.196938		264.4	-0.00064	0	-0.00643	0	-0.00153	0	-0.00656	0	-0.00405	0	-0.00176	0	-0.00061	0
264.6	0.00475819	0.00425781	0.016289	0.0108353	0.0910804	0.081843	0.62026	0.608794	0.25133	0.23832	0.00513956	0.00515472	0.0298215	0.0247585		264.6	0.461754	0.491757	0.0650738	0.059369	0.00579649	0.00518927	0.00490872	0.0040205	0.0253405	0.0232075	0.00338035	0.00442302	0.199402	0.197569		264.6	-0.00027	0	-0.00637	0	-0.00143	0	-0.00573	0	-0.0034	0	-0.00172	0	-0.00016	0
264.8	0.00514535	0.00429232	0.0160576	0.0109228	0.0918406	0.0824813	0.624244	0.61221	0.253628	0.240037	0.00534413	0.00519646	0.0298502	0.0249567		264.8	0.462654	0.492186	0.0656054	0.0596416	0.00623707	0.00521718	0.00462472	0.0040425	0.0254157	0.0233276	0.00347713	0.00444712	0.199635	0.198192		264.8	0.000369	0	-0.00653	0	-0.00092	0	-0.00544	0	-0.00295	0	-0.00105	0	0.000314	0
265	0.00567954	0.00432683	0.0159402	0.0110103	0.0923576	0.0831192	0.627804	0.615608	0.255899	0.24175	0.00573293	0.0052382	0.0305101	0.0251548		265	0.463093	0.492604	0.0655974	0.059912	0.00657564	0.00524492	0.004854	0.00406436	0.0252446	0.0234468	0.00339977	0.00447107	0.199723	0.198807		265	0.000433	0	-0.00628	0	-0.00114	0	-0.00514	0	-0.00239	0	-0.00078	0	0.000526	0
265.2	0.00613884	0.00436134	0.016341	0.0110978	0.0930115	0.0837567	0.631455	0.618986	0.25794	0.243461	0.00595654	0.00527994	0.0308506	0.0253529		265.2	0.463663	0.49301	0.0659739	0.0601801	0.00672722	0.00527248	0.00494047	0.0040861	0.0255567	0.0235652	0.00381997	0.00449487	0.200455	0.199413		265.2	5.28e-05	0	-0.00631	0	-0.00127	0	-0.00494	0	-0.00246	0	-0.00093	0	0.000682	0
265.4	0.00645858	0.00439584	0.0164976	0.0111852	0.0933118	0.0843938	0.634827	0.622345	0.259587	0.245168	0.00586259	0.00532167	0.031184	0.025551		265.4	0.463516	0.493405	0.0657175	0.0604459	0.00650376	0.00529987	0.00508293	0.0041077	0.0252555	0.0236828	0.00336679	0.00451853	0.200105	0.200011		265.4	-0.00029	0	-0.00626	0	-0.00103	0	-0.00439	0	-0.00237	0	-0.00053	0	0.000688	0
265.6	0.00684391	0.00443035	0.0170361	0.0112727	0.0943958	0.0850305	0.638579	0.625685	0.26114	0.246872	0.00653467	0.0053634	0.0313541	0.025749		265.6	0.462874	0.493788	0.0655967	0.0607095	0.00643682	0.00532708	0.00481191	0.00412917	0.0251143	0.0237996	0.00329819	0.00454205	0.200051	0.200601		265.6	-0.00051	0	-0.00684	0	-0.00168	0	-0.00447	0	-0.00276	0	-0.00083	0	0.000356	0
265.8	0.0064329	0.00446485	0.0165919	0.0113601	0.0944332	0.0856667	0.641444	0.629006	0.262956	0.248573	0.00629862	0.00540513	0.0318083	0.0259469		265.8	0.462976	0.494161	0.0655693	0.0609709	0.00640604	0.00535413	0.00455282	0.00415052	0.0250075	0.0239157	0.00332535	0.00456542	0.19997	0.201183		265.8	-0.00128	0	-0.0075	0	-0.00234	0	-0.00462	0	-0.00326	0	-0.00092	0	-0.00013	0
266	0.00682622	0.00449935	0.0170767	0.0114475	0.0952852	0.0863025	0.644744	0.632309	0.264648	0.25027	0.00635028	0.00544686	0.031796	0.0261448		266	0.463374	0.494524	0.0658479	0.06123	0.00703468	0.00538101	0.00422162	0.00417173	0.0252005	0.0240309	0.00316844	0.00458865	0.20065	0.201757		266	-0.00116	0	-0.00773	0	-0.00266	0	-0.00489	0	-0.00368	0	-0.0011	0	-0.0004	0
266.2	0.00667043	0.00453385	0.0167962	0.011535	0.0955532	0.0869379	0.647211	0.635593	0.266107	0.251964	0.00595593	0.00548858	0.0317316	0.0263427		266.2	0.463911	0.494876	0.0658178	0.0614869	0.00731908	0.00540772	0.00408341	0.00419282	0.0253776	0.0241454	0.00352187	0.00461175	0.201196	0.202324		266.2	-0.00154	0	-0.00759	0	-0.00287	0	-0.00469	0	-0.00382	0	-0.00096	0	-0.00032	0
266.4	0.00691579	0.00456835	0.0165796	0.0116224	0.0957288	0.0875729	0.649864	0.638858	0.267632	0.253655	0.0057489	0.0055303	0.0322464	0.0265405		266.4	0.464304	0.495218	0.0659786	0.0617417	0.00738481	0.00543426	0.00384879	0.00421379	0.0254278	0.024259	0.00351606	0.0046347	0.201259	0.202883		266.4	-0.00207	0	-0.00808	0	-0.00376	0	-0.00473	0	-0.00431	0	-0.00111	0	-0.00074	0
266.6	0.0064695	0.00460285	0.0165439	0.0117098	0.0959401	0.0882074	0.652965	0.642105	0.269023	0.255343	0.00532689	0.00557202	0.0320411	0.0267382		266.6	0.46497	0.495551	0.0665026	0.0619943	0.0074779	0.00546064	0.00360414	0.00423462	0.0254264	0.0243719	0.00326749	0.00465751	0.201445	0.203435		266.6	-0.00208	0	-0.00794	0	-0.00393	0	-0.00488	0	-0.00427	0	-0.00052	0	-0.00072	0
266.8	0.0060636	0.00463734	0.0165277	0.0117972	0.0959076	0.0888415	0.655561	0.645334	0.270674	0.257027	0.00534604	0.00561373	0.0319779	0.026936		266.8	0.465667	0.495874	0.0665877	0.0622448	0.00737694	0.00548685	0.00343576	0.00425533	0.024915	0.0244841	0.00316572	0.00468018	0.20226	0.203979		266.8	-0.00252	0	-0.00836	0	-0.00423	0	-0.00605	0	-0.00492	0	-0.00121	0	-0.00111	0
267	0.00551081	0.00467184	0.0157223	0.0118846	0.0962445	0.0894752	0.657903	0.648544	0.271519	0.258708	0.00510816	0.00565544	0.0319975	0.0271336		267	0.466196	0.496189	0.066936	0.0624932	0.00709691	0.0055129	0.00319489	0.00427592	0.0251953	0.0245954	0.00308291	0.00470272	0.202626	0.204516		267	-0.00282	0	-0.00829	0	-0.00465	0	-0.00641	0	-0.00491	0	-0.00101	0	-0.00133	0
267.2	0.00524109	0.00470633	0.0161499	0.0119719	0.0967592	0.0901085	0.660589	0.651737	0.273256	0.260386	0.00531826	0.00569715	0.0321808	0.0273312		267.2	0.467306	0.496494	0.0675189	0.0627395	0.00722366	0.00553879	0.00318799	0.00429638	0.0252429	0.0247061	0.00301754	0.00472512	0.203668	0.205046		267.2	-0.00318	0	-0.00847	0	-0.00516	0	-0.00718	0	-0.00576	0	-0.0008	0	-0.00107	0
267.4	0.00533372	0.00474082	0.0161821	0.0120593	0.0974547	0.0907413	0.663883	0.654911	0.275051	0.262061	0.00564349	0.00573886	0.0323796	0.0275288		267.4	0.467828	0.496791	0.0673883	0.0629837	0.00689687	0.00556451	0.00273052	0.00431673	0.0253039	0.0248159	0.00301841	0.00474738	0.203983	0.205568		267.4	-0.00362	0	-0.0085	0	-0.00572	0	-0.00792	0	-0.00625	0	-0.00084	0	-0.00146	0
267.6	0.00595517	0.0047753	0.0167393	0.0121467	0.0987003	0.0913738	0.666749	0.658067	0.276525	0.263733	0.00535255	0.00578056	0.0327127	0.0277263		267.6	0.468459	0.49708	0.0676781	0.0632258	0.00674382	0.00559008	0.0022475	0.00433694	0.0251761	0.024925	0.00263291	0.00476951	0.204151	0.206084		267.6	-0.00372	0	-0.00926	0	-0.00629	0	-0.00864	0	-0.00714	0	-0.00158	0	-0.00202	0
267.8	0.00632757	0.00480979	0.016887	0.012234	0.099104	0.0920058	0.669696	0.661206	0.278308	0.265401	0.00523154	0.00582227	0.0331915	0.0279237		267.8	0.469045	0.49736	0.0677848	0.0634659	0.00587789	0.00561548	0.00184034	0.00435704	0.0252801	0.0250334	0.00256553	0.00479151	0.204625	0.206593		267.8	-0.00376	0	-0.00938	0	-0.00625	0	-0.00936	0	-0.00747	0	-0.00216	0	-0.00222	0
268	0.0066487	0.00484428	0.0176126	0.0123213	0.100309	0.0926374	0.672739	0.664327	0.280108	0.267066	0.0058184	0.00586396	0.0335194	0.0281211		268	0.468894	0.497633	0.0675169	0.0637039	0.00553094	0.00564073	0.00105904	0.00437702	0.0248658	0.025141	0.00192311	0.00481337	0.204457	0.207095		268	-0.00361	0	-0.00905	0	-0.00628	0	-0.00981	0	-0.00737	0	-0.00174	0	-0.00248	0
268.2	0.00678386	0.00487876	0.0178265	0.0124087	0.100737	0.0932686	0.675593	0.66743	0.282284	0.268728	0.00604234	0.00590566	0.0339087	0.0283185		268.2	0.469567	0.497898	0.0678995	0.06394	0.00528571	0.00566582	0.0014935	0.00439688	0.0248037	0.0252479	0.0018444	0.0048351	0.204916	0.20759		268.2	-0.00341	0	-0.00865	0	-0.00599	0	-0.00964	0	-0.00722	0	-0.00176	0	-0.00224	0
268.4	0.00743074	0.00491324	0.0181407	0.012496	0.101136	0.0938993	0.679121	0.670516	0.284714	0.270387	0.00610239	0.00594735	0.0344001	0.0285158		268.4	0.470033	0.498155	0.0684498	0.064174	0.00519627	0.00569075	0.00071934	0.00441661	0.0245599	0.0253541	0.00172258	0.00485669	0.205211	0.208079		268.4	-0.00253	0	-0.00839	0	-0.0056	0	-0.00902	0	-0.00691	0	-0.00116	0	-0.00156	0
268.6	0.00762041	0.00494772	0.0179786	0.0125833	0.101509	0.0945297	0.68178	0.673585	0.286461	0.272043	0.00599557	0.00598905	0.0349147	0.0287131		268.6	0.471221	0.498406	0.0688857	0.0644061	0.00550899	0.00571552	0.00094123	0.00443623	0.0251166	0.0254596	0.0022255	0.00487816	0.206069	0.208561		268.6	-0.00175	0	-0.00812	0	-0.00524	0	-0.00843	0	-0.00628	0	-0.00093	0	-0.00107	0
268.8	0.00826769	0.0049822	0.0182527	0.0126706	0.102508	0.0951596	0.685067	0.676636	0.289162	0.273696	0.00596196	0.00603073	0.0350746	0.0289103		268.8	0.472171	0.498649	0.0692548	0.0646362	0.00545178	0.00574014	0.00128651	0.00445573	0.0254433	0.0255643	0.00290786	0.00489949	0.20656	0.209036		268.8	-0.00096	0	-0.00764	0	-0.00422	0	-0.00783	0	-0.00533	0	0.000234	0	-0.00026	0
269	0.00872951	0.00501667	0.01871	0.0127579	0.103439	0.0957891	0.688379	0.67967	0.291396	0.275345	0.00620835	0.00607242	0.0355085	0.0291074		269	0.472273	0.498885	0.0690469	0.0648644	0.00571034	0.00576461	0.00195004	0.00447512	0.0258937	0.0256683	0.00335724	0.0049207	0.206753	0.209505		269	-0.00039	0	-0.00693	0	-0.00408	0	-0.00732	0	-0.00448	0	0.000472	0	-7e-06	0
269.2	0.00852488	0.00505115	0.0189027	0.0128451	0.104329	0.0964182	0.691191	0.682687	0.29293	0.276991	0.00572213	0.0061141	0.0358161	0.0293046		269.2	0.472606	0.499115	0.0691287	0.0650906	0.00624618	0.00578892	0.002253	0.00449439	0.0262996	0.0257717	0.00371075	0.00494178	0.206961	0.209968		269.2	-0.00023	0	-0.00652	0	-0.00383	0	-0.00677	0	-0.00452	0	0.000291	0	-0.00021	0
269.4	0.0084333	0.00508562	0.01924	0.0129324	0.104921	0.0970468	0.694314	0.685687	0.294363	0.278634	0.00596188	0.00615578	0.0357965	0.0295016		269.4	0.47222	0.499339	0.0688073	0.065315	0.00636783	0.00581309	0.00230623	0.00451354	0.0263611	0.0258743	0.00371538	0.00496273	0.206918	0.210425		269.4	0.000167	0	-0.00573	0	-0.0033	0	-0.006	0	-0.00409	0	0.000686	0	-0.00017	0
269.6	0.00860037	0.00512009	0.0199862	0.0130197	0.105897	0.0976751	0.69731	0.68867	0.295531	0.280274	0.00672462	0.00619746	0.036287	0.0296987		269.6	0.472588	0.499556	0.0689957	0.0655374	0.00683224	0.0058371	0.00233022	0.00453257	0.0267917	0.0259762	0.00383815	0.00498355	0.207237	0.210876		269.6	0.000474	0	-0.00559	0	-0.00321	0	-0.0058	0	-0.00401	0	0.000812	0	8.23e-05	0
269.8	0.0083654	0.00515456	0.0197526	0.0131069	0.106241	0.0983029	0.699618	0.691636	0.297176	0.281911	0.00676966	0.00623913	0.0369314	0.0298956		269.8	0.472991	0.499767	0.0688124	0.065758	0.00677898	0.00586096	0.00229799	0.0045515	0.02667	0.0260774	0.00382827	0.00500425	0.206787	0.21132		269.8	0.000764	0	-0.00539	0	-0.0023	0	-0.00536	0	-0.00351	0	0.001432	0	0.000293	0
270	0.00837388	0.00518903	0.0197457	0.0131942	0.107202	0.0989303	0.70227	0.694585	0.29834	0.283545	0.00733522	0.00628081	0.0365627	0.0300925		270	0.473036	0.499972	0.0690055	0.0659766	0.00717214	0.00588467	0.00255862	0.00457031	0.0266549	0.0261779	0.00413126	0.00502482	0.206753	0.211759		270	0.000903	0	-0.00494	0	-0.0014	0	-0.00486	0	-0.00301	0	0.001477	0	0.000627	0
270.2	0.00842929	0.0052235	0.019366	0.0132814	0.107431	0.0995573	0.704843	0.697518	0.299676	0.285175	0.00720683	0.00632248	0.0365758	0.0302894		270.2	0.47332	0.500171	0.0687718	0.0661935	0.0070126	0.00590823	0.00264773	0.004589	0.0265052	0.0262778	0.00350303	0.00504527	0.206516	0.212192		270.2	0.000304	0	-0.00582	0	-0.00155	0	-0.00485	0	-0.00337	0	0.001152	0	6.76e-05	0
270.4	0.00834804	0.00525796	0.0196812	0.0133686	0.107653	0.100184	0.707755	0.700434	0.300936	0.286803	0.00742167	0.00636414	0.0366652	0.0304862		270.4	0.473731	0.500365	0.0693249	0.0664085	0.00721694	0.00593165	0.0032099	0.00460759	0.0269768	0.026377	0.00358143	0.00506559	0.206531	0.212619		270.4	0.000479	0	-0.00619	0	-0.00129	0	-0.00463	0	-0.00319	0	0.001304	0	-8.4e-05	0
270.6	0.00784385	0.00529242	0.0191044	0.0134558	0.107608	0.10081	0.709699	0.703334	0.301991	0.288427	0.00689363	0.00640581	0.0360258	0.030683		270.6	0.473427	0.500553	0.0690934	0.0666217	0.00681607	0.00595492	0.00335449	0.00462606	0.0263719	0.0264755	0.00330476	0.00508579	0.206684	0.21304		270.6	0.000303	0	-0.00587	0	-0.00107	0	-0.00478	0	-0.00314	0	0.001304	0	-0.00013	0
270.8	0.00769705	0.00532689	0.0188871	0.013543	0.108315	0.101436	0.712211	0.706217	0.303049	0.290048	0.0069514	0.00644747	0.0359084	0.0308797		270.8	0.473284	0.500736	0.0688623	0.0668331	0.00683832	0.00597804	0.00384931	0.00464442	0.026464	0.0265733	0.00330283	0.00510586	0.206873	0.213456		270.8	-5.8e-05	0	-0.00572	0	-0.0004	0	-0.00448	0	-0.0029	0	0.001404	0	0.000414	0
271	0.00716523	0.00536135	0.0183595	0.0136302	0.108886	0.102061	0.714604	0.709085	0.303779	0.291666	0.00673578	0.00648913	0.0359595	0.0310764		271	0.473702	0.500914	0.0694516	0.0670427	0.00717513	0.00600102	0.00477481	0.00466267	0.0268836	0.0266705	0.00376267	0.00512582	0.2077	0.213866		271	0.0002	0	-0.0054	0	-0.00074	0	-0.00439	0	-0.0027	0	0.001881	0	0.000782	0
271.2	0.00722288	0.0053958	0.018697	0.0137174	0.109884	0.102686	0.717112	0.711936	0.304945	0.293282	0.00671211	0.00653078	0.0360975	0.031273		271.2	0.473809	0.501087	0.0696624	0.0672505	0.00724924	0.00602386	0.00468011	0.00468082	0.0263859	0.026767	0.00381992	0.00514565	0.207959	0.214271		271.2	-0.00013	0	-0.00565	0	-0.00089	0	-0.00505	0	-0.00334	0	0.001478	0	0.000496	0
271.4	0.00758417	0.00543026	0.0185318	0.0138046	0.111093	0.103311	0.720207	0.71477	0.305753	0.294894	0.00681744	0.00657244	0.036182	0.0314696		271.4	0.47379	0.501255	0.0691287	0.0674566	0.00696173	0.00604655	0.00454476	0.00469885	0.0257025	0.0268628	0.00356639	0.00516536	0.207781	0.21467		271.4	-0.00028	0	-0.00578	0	-0.00084	0	-0.00584	0	-0.00374	0	0.001127	0	0.000335	0
271.6	0.00724467	0.00546471	0.0187187	0.0138917	0.111422	0.103935	0.722347	0.717589	0.306457	0.296502	0.00612625	0.00661409	0.0357971	0.0316661		271.6	0.473193	0.501419	0.0685996	0.0676609	0.00639504	0.00606911	0.00371297	0.00471677	0.0252488	0.026958	0.00284711	0.00518496	0.207906	0.215063		271.6	-0.00053	0	-0.0059	0	-0.00092	0	-0.00657	0	-0.00391	0	0.000914	0	-0.00012	0
271.8	0.00761442	0.00549917	0.0192127	0.0139789	0.112124	0.104558	0.72544	0.720392	0.30837	0.298108	0.0070089	0.00665573	0.0365843	0.0318626		271.8	0.47306	0.501578	0.0682341	0.0678636	0.00515081	0.00609152	0.00293395	0.00473459	0.0243679	0.0270526	0.00221147	0.00520443	0.207598	0.215452		271.8	-0.00061	0	-0.00611	0	-0.00169	0	-0.0069	0	-0.00401	0	0.000536	0	-0.0006	0
272	0.00797325	0.00553362	0.0197381	0.014066	0.11324	0.105182	0.728311	0.72318	0.310408	0.299711	0.00769389	0.00669738	0.0374169	0.032059		272	0.473691	0.501732	0.0684191	0.0680645	0.00500798	0.00611379	0.00268934	0.0047523	0.0243983	0.0271465	0.00203194	0.00522379	0.208205	0.215835		272	-0.0006	0	-0.00627	0	-0.00211	0	-0.00713	0	-0.00435	0	0.000367	0	-0.00085	0
272.2	0.00798144	0.00556807	0.0193949	0.0141532	0.113164	0.105804	0.730966	0.725951	0.312076	0.301311	0.00703763	0.00673902	0.0376177	0.0322554		272.2	0.474001	0.501882	0.0687728	0.0682637	0.0047746	0.00613592	0.00264699	0.0047699	0.0244372	0.0272398	0.0023412	0.00524303	0.209493	0.216214		272.2	-0.00093	0	-0.0064	0	-0.00179	0	-0.00682	0	-0.00426	0	-0.00011	0	-0.0006	0
272.4	0.00838642	0.00560251	0.0199641	0.0142403	0.114074	0.106427	0.733888	0.728707	0.314048	0.302907	0.00703095	0.00678066	0.0382571	0.0324517		272.4	0.474543	0.502028	0.0692965	0.0684612	0.00459422	0.00615791	0.00237053	0.0047874	0.0246386	0.0273324	0.00260502	0.00526215	0.210338	0.216587		272.4	-0.00063	0	-0.00679	0	-0.00187	0	-0.00697	0	-0.00424	0	4.93e-06	0	-0.00038	0
272.6	0.00827572	0.00563696	0.0200031	0.0143274	0.114431	0.107049	0.736287	0.731447	0.316445	0.304501	0.00704884	0.0068223	0.0386301	0.032648		272.6	0.475399	0.502169	0.070282	0.068657	0.00490104	0.00617977	0.00313708	0.0048048	0.0254188	0.0274244	0.00348648	0.00528116	0.211208	0.216955		272.6	-0.00066	0	-0.00717	0	-0.00229	0	-0.00766	0	-0.00435	0	-0.00045	0	-0.00071	0
272.8	0.00860357	0.00567141	0.0207312	0.0144145	0.115562	0.10767	0.739461	0.734172	0.318711	0.306091	0.00674441	0.00686393	0.0389768	0.0328442		272.8	0.475664	0.502307	0.0706964	0.0688512	0.00498206	0.00620149	0.00381386	0.00482209	0.0259264	0.0275158	0.00383094	0.00530005	0.211613	0.217318		272.8	-0.00064	0	-0.00733	0	-0.00209	0	-0.00751	0	-0.0042	0	-0.00071	0	-0.00094	0
273	0.00877421	0.00570585	0.0210636	0.0145016	0.116016	0.108292	0.742562	0.736882	0.320659	0.307679	0.00700563	0.00690557	0.039572	0.0330404		273	0.476073	0.502441	0.0711725	0.0690438	0.00534264	0.00622307	0.00441413	0.00483927	0.0264497	0.0276065	0.00431636	0.00531883	0.21218	0.217677		273	-0.00039	0	-0.00715	0	-0.00206	0	-0.00738	0	-0.00416	0	-0.00095	0	-0.00127	0
273.2	0.0087231	0.00574029	0.0215536	0.0145887	0.116536	0.108912	0.744937	0.739576	0.322023	0.309263	0.0066727	0.0069472	0.0402392	0.0332366		273.2	0.477044	0.502571	0.0718223	0.0692347	0.00571814	0.00624452	0.00438222	0.00485635	0.0265606	0.0276967	0.00456437	0.00533749	0.212604	0.21803		273.2	-0.00051	0	-0.0072	0	-0.00225	0	-0.00734	0	-0.0044	0	-0.00139	0	-0.00147	0
273.4	0.0085879	0.00577473	0.0221433	0.0146758	0.116554	0.109533	0.747516	0.742255	0.323064	0.310845	0.00691239	0.00698882	0.0405445	0.0334327		273.4	0.477622	0.502698	0.0723509	0.069424	0.00605178	0.00626584	0.0042012	0.00487333	0.0273538	0.0277862	0.00420817	0.00535604	0.213322	0.218379		273.4	-0.00037	0	-0.00719	0	-0.00161	0	-0.00677	0	-0.00375	0	-0.00114	0	-0.001	0
273.6	0.00861559	0.00580917	0.0222439	0.0147628	0.117246	0.110153	0.749883	0.744919	0.324688	0.312423	0.00741168	0.00703045	0.0408973	0.0336287		273.6	0.478888	0.502821	0.0726814	0.0696117	0.00630632	0.00628702	0.00437924	0.00489021	0.0279906	0.0278751	0.00417402	0.00537448	0.213138	0.218723		273.6	2.41e-05	0	-0.00757	0	-0.001	0	-0.00653	0	-0.00339	0	-0.00114	0	-0.00055	0
273.8	0.00815574	0.0058436	0.0218238	0.0148499	0.117687	0.110772	0.751668	0.747568	0.325687	0.313999	0.00749672	0.00707207	0.0402063	0.0338247		273.8	0.478971	0.50294	0.072895	0.0697979	0.00606717	0.00630807	0.00408808	0.00490698	0.0279621	0.0279634	0.00388775	0.00539281	0.21287	0.219063		273.8	-0.00048	0	-0.00826	0	-0.00098	0	-0.00685	0	-0.00349	0	-0.00192	0	-0.00098	0
274	0.00766866	0.00587804	0.0215498	0.0149369	0.117932	0.111391	0.753914	0.750202	0.326923	0.315571	0.00780268	0.00711369	0.0394762	0.0340206		274	0.479151	0.503056	0.0731542	0.0699824	0.00637087	0.00632899	0.00405309	0.00492366	0.0279554	0.0280511	0.00342674	0.00541102	0.213049	0.219398		274	-0.00073	0	-0.00889	0	-0.00125	0	-0.00698	0	-0.00374	0	-0.0027	0	-0.00128	0
274.2	0.00830915	0.00591247	0.0217367	0.015024	0.118637	0.11201	0.756795	0.752821	0.32885	0.31714	0.00787916	0.0071553	0.0397172	0.0342165		274.2	0.479774	0.503169	0.0730241	0.0701654	0.00669759	0.00634978	0.00404325	0.00494024	0.0283515	0.0281383	0.00286071	0.00542913	0.213209	0.219728		274.2	-0.00095	0	-0.00932	0	-0.00118	0	-0.0067	0	-0.00453	0	-0.00306	0	-0.00191	0
274.4	0.00856778	0.0059469	0.0217735	0.015111	0.118753	0.112628	0.759002	0.755426	0.330129	0.318707	0.00788259	0.00719691	0.0396169	0.0344124		274.4	0.47987	0.503279	0.072773	0.0703469	0.00688729	0.00637043	0.00398091	0.00495671	0.0289235	0.0282248	0.0031834	0.00544712	0.213361	0.220054		274.4	-0.00062	0	-0.00928	0	-0.00115	0	-0.00663	0	-0.00455	0	-0.00318	0	-0.00183	0
274.6	0.00839358	0.00598133	0.0211822	0.015198	0.119324	0.113246	0.760851	0.758015	0.331383	0.32027	0.00775136	0.00723853	0.0395633	0.0346081		274.6	0.480132	0.503385	0.0724958	0.0705268	0.00679761	0.00639096	0.00412463	0.00497309	0.0285946	0.0283107	0.00276635	0.005465	0.213456	0.220376		274.6	-0.00046	0	-0.00907	0	-0.00096	0	-0.0059	0	-0.00453	0	-0.00261	0	-0.00167	0
274.8	0.0081265	0.00601576	0.0210397	0.015285	0.12001	0.113864	0.763288	0.76059	0.33258	0.321831	0.00747084	0.00728013	0.0398215	0.0348039		274.8	0.480055	0.503489	0.0725227	0.0707052	0.00675558	0.00641136	0.00378318	0.00498937	0.0286946	0.0283961	0.0025096	0.00548278	0.21333	0.220694		274.8	-0.00048	0	-0.00899	0	-0.00077	0	-0.00587	0	-0.00423	0	-0.00197	0	-0.0013	0
275	0.00784763	0.00605018	0.0206037	0.015372	0.120106	0.114481	0.764933	0.763151	0.333429	0.323388	0.00714018	0.00732174	0.0397501	0.0349996		275	0.480547	0.50359	0.0726876	0.0708821	0.00706829	0.00643164	0.00394441	0.00500555	0.0282787	0.0284808	0.00244277	0.00550045	0.213503	0.221007		275	-0.00084	0	-0.00904	0	-0.00116	0	-0.00565	0	-0.00476	0	-0.00234	0	-0.00134	0
275.2	0.00787255	0.00608461	0.0201924	0.015459	0.120403	0.115097	0.766937	0.765697	0.334044	0.324942	0.00703886	0.00736334	0.039402	0.0351952		275.2	0.480873	0.503688	0.0724379	0.0710575	0.00688864	0.00645178	0.00308571	0.00502163	0.028001	0.028565	0.00233547	0.00551801	0.213221	0.221316		275.2	-0.00146	0	-0.00958	0	-0.00169	0	-0.00584	0	-0.00547	0	-0.00256	0	-0.0019	0
275.4	0.00807583	0.00611903	0.0199567	0.015546	0.121128	0.115714	0.768999	0.768229	0.335706	0.326494	0.00713892	0.00740494	0.0393284	0.0353908		275.4	0.48113	0.503783	0.0721386	0.0712314	0.00710908	0.0064718	0.00331211	0.00503762	0.0277002	0.0286487	0.00236624	0.00553547	0.213459	0.221621		275.4	-0.00148	0	-0.00938	0	-0.00183	0	-0.00608	0	-0.00591	0	-0.00229	0	-0.00161	0
275.6	0.00817176	0.00615345	0.0202156	0.015633	0.121408	0.11633	0.771275	0.770746	0.337375	0.328042	0.00738964	0.00744654	0.0397409	0.0355864		275.6	0.481324	0.503875	0.0719217	0.0714038	0.00657542	0.0064917	0.00278341	0.00505351	0.0276871	0.0287317	0.00207933	0.00555282	0.213533	0.221921		275.6	-0.00173	0	-0.00916	0	-0.00255	0	-0.00611	0	-0.00585	0	-0.00198	0	-0.00189	0
275.8	0.0087424	0.00618787	0.020127	0.0157199	0.122359	0.116945	0.773734	0.77325	0.339125	0.329588	0.00819964	0.00748813	0.0405602	0.0357819		275.8	0.481501	0.503965	0.0718983	0.0715748	0.00627363	0.00651147	0.00232117	0.0050693	0.0271214	0.0288142	0.00221081	0.00557006	0.213396	0.222218		275.8	-0.00125	0	-0.00903	0	-0.00282	0	-0.00578	0	-0.00562	0	-0.00184	0	-0.00172	0
276	0.00883421	0.00622229	0.0199834	0.0158069	0.12242	0.11756	0.776081	0.775739	0.340923	0.331131	0.00773848	0.00752972	0.040806	0.0359773		276	0.48181	0.504053	0.0721718	0.0717443	0.00682093	0.00653112	0.00236265	0.00508501	0.0272362	0.0288961	0.0026963	0.0055872	0.214561	0.222511		276	-0.00136	0	-0.00844	0	-0.00268	0	-0.00572	0	-0.00591	0	-0.0019	0	-0.00176	0
276.2	0.00889806	0.0062567	0.0204563	0.0158938	0.122555	0.118175	0.778569	0.778214	0.343033	0.33267	0.00744256	0.00757131	0.0408472	0.0361727		276.2	0.481491	0.504137	0.0721933	0.0719125	0.00643666	0.00655064	0.00205002	0.00510061	0.0264642	0.0289775	0.00282034	0.00560424	0.215023	0.2228		276.2	-0.00156	0	-0.00835	0	-0.00239	0	-0.00603	0	-0.00587	0	-0.00223	0	-0.00159	0
276.4	0.00907891	0.00629112	0.0210808	0.0159808	0.123326	0.118789	0.780731	0.780675	0.344994	0.334207	0.00753727	0.0076129	0.0411795	0.0363681		276.4	0.482146	0.50422	0.072489	0.0720791	0.00653851	0.00657004	0.00255739	0.00511612	0.0261136	0.0290583	0.00344208	0.00562117	0.215329	0.223085		276.4	-0.00168	0	-0.00851	0	-0.00251	0	-0.00671	0	-0.00636	0	-0.00235	0	-0.00131	0
276.6	0.0096296	0.00632553	0.0213757	0.0160677	0.124057	0.119403	0.782728	0.783123	0.347156	0.335741	0.00743423	0.00765448	0.0413706	0.0365634		276.6	0.482209	0.5043	0.0729924	0.0722444	0.00656768	0.00658932	0.002664	0.00513154	0.0262077	0.0291386	0.00335972	0.005638	0.215492	0.223366		276.6	-0.00201	0	-0.00819	0	-0.00245	0	-0.00713	0	-0.00658	0	-0.00249	0	-0.00159	0
276.8	0.00947028	0.00635994	0.0216172	0.0161546	0.124696	0.120016	0.784823	0.785556	0.348647	0.337272	0.00696765	0.00769607	0.0417196	0.0367587		276.8	0.482366	0.504378	0.0731857	0.0724083	0.00665513	0.00660848	0.00276659	0.00514687	0.0258572	0.0292183	0.00333689	0.00565473	0.215526	0.223643		276.8	-0.00205	0	-0.0079	0	-0.002	0	-0.00702	0	-0.00584	0	-0.00238	0	-0.00163	0
277	0.00976578	0.00639435	0.022013	0.0162415	0.125465	0.120629	0.787759	0.787976	0.350798	0.338799	0.00728019	0.00773764	0.0421888	0.0369539		277	0.482799	0.504454	0.0736744	0.0725708	0.00638118	0.00662753	0.00274731	0.00516211	0.0255515	0.0292975	0.00312311	0.00567135	0.216024	0.223917		277	-0.00195	0	-0.0072	0	-0.0017	0	-0.00671	0	-0.00544	0	-0.00206	0	-0.00101	0
277.2	0.00987269	0.00642876	0.0227189	0.0163284	0.126076	0.121242	0.789961	0.790382	0.352556	0.340324	0.0071509	0.00777922	0.0419487	0.037149		277.2	0.483557	0.504528	0.0741952	0.0727319	0.00686257	0.00664645	0.00302973	0.00517725	0.026224	0.0293762	0.00347654	0.00568788	0.216218	0.224187		277.2	-0.0018	0	-0.00674	0	-0.0015	0	-0.00643	0	-0.00493	0	-0.00198	0	-0.00066	0
277.4	0.00984782	0.00646316	0.0230174	0.0164153	0.126631	0.121854	0.792528	0.792775	0.354234	0.341847	0.00754127	0.00782079	0.0419119	0.0373441		277.4	0.483691	0.504599	0.0746455	0.0728917	0.00699267	0.00666525	0.00318412	0.0051923	0.0267642	0.0294543	0.00357486	0.0057043	0.216495	0.224454		277.4	-0.00171	0	-0.00665	0	-0.00117	0	-0.00612	0	-0.00423	0	-0.00163	0	-0.0004	0
277.6	0.00960546	0.00649757	0.022958	0.0165022	0.127458	0.122466	0.794602	0.795154	0.355941	0.343366	0.00750609	0.00786236	0.0417639	0.0375392		277.6	0.484072	0.504669	0.0749558	0.0730501	0.00711177	0.00668394	0.00320077	0.00520727	0.0272201	0.0295318	0.00402975	0.00572063	0.216381	0.224716		277.6	-0.00166	0	-0.00652	0	-0.00144	0	-0.00632	0	-0.00407	0	-0.00208	0	-0.00039	0
277.8	0.00957992	0.00653197	0.023551	0.016589	0.128314	0.123077	0.796918	0.797519	0.357649	0.344882	0.00778407	0.00790393	0.0418721	0.0377342		277.8	0.484178	0.504736	0.0755347	0.0732072	0.00733408	0.00670251	0.00322294	0.00522214	0.0272517	0.0296089	0.00415969	0.00573686	0.21657	0.224976		277.8	-0.00202	0	-0.00662	0	-0.00213	0	-0.00666	0	-0.00406	0	-0.00255	0	-0.00074	0
278	0.00989358	0.00656637	0.0241801	0.0166759	0.129141	0.123688	0.799229	0.799872	0.359859	0.346395	0.00826813	0.0079455	0.0423212	0.0379292		278	0.484507	0.504802	0.0757532	0.0733629	0.00760442	0.00672096	0.00351726	0.00523692	0.0278254	0.0296854	0.00405263	0.00575298	0.217107	0.225232		278	-0.00169	0	-0.0065	0	-0.00207	0	-0.00631	0	-0.00429	0	-0.00197	0	-0.00108	0
278.2	0.0102081	0.00660077	0.0244087	0.0167627	0.129695	0.124298	0.801784	0.802211	0.361241	0.347906	0.00835822	0.00798706	0.0427782	0.0381241		278.2	0.484601	0.504866	0.0750311	0.0735174	0.00764334	0.0067393	0.00358715	0.00525162	0.0282239	0.0297614	0.00368158	0.00576901	0.217183	0.225484		278.2	-0.0018	0	-0.00609	0	-0.00171	0	-0.00602	0	-0.00419	0	-0.00149	0	-0.00088	0
278.4	0.0104671	0.00663517	0.0245862	0.0168496	0.130006	0.124909	0.804266	0.804537	0.362311	0.349413	0.00826547	0.00802862	0.0428367	0.038319		278.4	0.484783	0.504928	0.0745568	0.0736705	0.0075533	0.00675752	0.00385188	0.00526622	0.0283972	0.0298369	0.00342645	0.00578495	0.217005	0.225733		278.4	-0.00169	0	-0.00677	0	-0.00246	0	-0.00648	0	-0.00454	0	-0.00121	0	-0.00112	0
278.6	0.0101369	0.00666956	0.0242307	0.0169364	0.130613	0.125518	0.806168	0.806849	0.363711	0.350918	0.00818471	0.00807018	0.0433298	0.0385138		278.6	0.484937	0.504988	0.0743834	0.0738223	0.0076345	0.00677563	0.00398907	0.00528074	0.0285071	0.0299119	0.00333206	0.00580078	0.216881	0.225979		278.6	-0.00164	0	-0.00717	0	-0.00247	0	-0.00591	0	-0.0048	0	-0.00088	0	-0.00144	0
278.8	0.0101524	0.00670395	0.024159	0.0170232	0.130912	0.126128	0.808271	0.809149	0.36451	0.35242	0.00797583	0.00811173	0.0433626	0.0387086		278.8	0.484875	0.505047	0.0742348	0.0739729	0.00770955	0.00679363	0.00410297	0.00529517	0.0289267	0.0299863	0.00331646	0.00581652	0.217346	0.226221		278.8	-0.00198	0	-0.00732	0	-0.00299	0	-0.00612	0	-0.00499	0	-0.0009	0	-0.00156	0
279	0.00994343	0.00673835	0.0237135	0.01711	0.131435	0.126737	0.809716	0.811436	0.365425	0.353919	0.00823364	0.00815328	0.0434688	0.0389033		279	0.485032	0.505104	0.0739392	0.0741222	0.00765974	0.00681152	0.0046204	0.00530952	0.0287047	0.0300603	0.00358757	0.00583217	0.217138	0.22646		279	-0.00219	0	-0.00815	0	-0.00336	0	-0.0057	0	-0.00572	0	-0.00099	0	-0.00126	0
279.2	0.00988289	0.00677274	0.0238171	0.0171968	0.132057	0.127345	0.811888	0.81371	0.367088	0.355415	0.00853025	0.00819483	0.0435834	0.039098		279.2	0.484571	0.50516	0.0735287	0.0742702	0.00748209	0.00682929	0.00502517	0.00532378	0.0289617	0.0301338	0.00406013	0.00584772	0.217497	0.226696		279.2	-0.00214	0	-0.00864	0	-0.00362	0	-0.00544	0	-0.00585	0	-0.00082	0	-0.00128	0
279.4	0.0101481	0.00680713	0.0236305	0.0172836	0.13275	0.127953	0.813877	0.815971	0.368406	0.356908	0.0087643	0.00823638	0.0438051	0.0392926		279.4	0.484289	0.505213	0.0734635	0.0744169	0.0070513	0.00684695	0.00508963	0.00533795	0.0290733	0.0302067	0.0042873	0.00586318	0.217601	0.226929		279.4	-0.00232	0	-0.00848	0	-0.00344	0	-0.00564	0	-0.00616	0	-0.00107	0	-0.0012	0
279.6	0.0100563	0.00684151	0.0235068	0.0173704	0.133229	0.128561	0.81638	0.818219	0.369593	0.358399	0.00886347	0.00827792	0.0440392	0.0394872		279.6	0.484164	0.505266	0.0734327	0.0745625	0.0071148	0.0068645	0.0049733	0.00535204	0.0290948	0.0302792	0.00426896	0.00587854	0.21792	0.227159		279.6	-0.00231	0	-0.00874	0	-0.00376	0	-0.00562	0	-0.00618	0	-0.00111	0	-0.00133	0
279.8	0.00987804	0.0068759	0.0228257	0.0174571	0.133177	0.129168	0.817763	0.820455	0.370392	0.359886	0.008381	0.00831946	0.0434762	0.0396817		279.8	0.483896	0.505317	0.0736336	0.0747068	0.00741156	0.00688194	0.00494063	0.00536604	0.0293076	0.0303512	0.00517391	0.00589381	0.218614	0.227386		279.8	-0.00214	0	-0.00908	0	-0.00381	0	-0.00579	0	-0.00648	0	-0.00187	0	-0.00161	0
280	0.00985411	0.00691028	0.0230464	0.0175439	0.133257	0.129775	0.819646	0.822678	0.372067	0.361371	0.00817431	0.008361	0.0434832	0.0398762		280	0.48404	0.505366	0.0737385	0.0748498	0.00731147	0.00689927	0.00493811	0.00537996	0.0292195	0.0304226	0.00525811	0.00590898	0.219119	0.227609		280	-0.0023	0	-0.00912	0	-0.00392	0	-0.00611	0	-0.00703	0	-0.00215	0	-0.0015	0
280.2	0.00961073	0.00694467	0.023043	0.0176307	0.133707	0.130382	0.821429	0.824888	0.372753	0.362853	0.00782885	0.00840254	0.0435751	0.0400706		280.2	0.48437	0.505414	0.0738166	0.0749917	0.00697249	0.0069165	0.00493615	0.0053938	0.0290747	0.0304936	0.00556841	0.00592407	0.219393	0.22783		280.2	-0.00249	0	-0.00968	0	-0.00381	0	-0.00678	0	-0.00764	0	-0.00289	0	-0.00123	0
280.4	0.00933049	0.00697905	0.0226542	0.0177174	0.134173	0.130988	0.822673	0.827086	0.373673	0.364332	0.00723317	0.00844407	0.0433081	0.040265		280.4	0.485326	0.505461	0.074392	0.0751324	0.00725854	0.00693362	0.00538905	0.00540755	0.0293408	0.0305641	0.00583193	0.00593906	0.219895	0.228048		280.4	-0.00268	0	-0.00965	0	-0.00403	0	-0.00726	0	-0.0076	0	-0.00346	0	-0.00146	0
280.6	0.00927956	0.00701343	0.022586	0.0178041	0.135044	0.131593	0.824268	0.829272	0.375282	0.365808	0.00699015	0.0084856	0.0433457	0.0404593		280.6	0.485347	0.505506	0.0745414	0.0752719	0.00683385	0.00695063	0.0049897	0.00542122	0.0294479	0.0306342	0.00522657	0.00595396	0.219977	0.228262		280.6	-0.00288	0	-0.00952	0	-0.004	0	-0.00764	0	-0.00756	0	-0.0039	0	-0.00175	0
280.8	0.00903568	0.0070478	0.0226849	0.0178908	0.135688	0.132199	0.826265	0.831445	0.377095	0.367282	0.00658397	0.00852713	0.0436836	0.0406536		280.8	0.485988	0.505551	0.0749713	0.0754102	0.00679764	0.00696753	0.00503791	0.00543481	0.0294026	0.0307037	0.00539664	0.00596877	0.220139	0.228474		280.8	-0.00292	0	-0.00944	0	-0.00362	0	-0.00783	0	-0.00701	0	-0.00405	0	-0.00159	0
281	0.00928959	0.00708218	0.0231677	0.0179775	0.136558	0.132804	0.828472	0.833606	0.379204	0.368752	0.00678964	0.00856865	0.0438582	0.0408479		281	0.485949	0.505593	0.0748738	0.0755473	0.00627304	0.00698433	0.00486405	0.00544832	0.0288686	0.0307728	0.00470976	0.0059835	0.219893	0.228683		281	-0.00277	0	-0.00935	0	-0.00399	0	-0.00749	0	-0.00732	0	-0.00419	0	-0.00145	0
281.2	0.00961153	0.00711655	0.0236014	0.0180643	0.137613	0.133408	0.830435	0.835755	0.381072	0.37022	0.00692826	0.00861018	0.0441935	0.0410421		281.2	0.48643	0.505635	0.0747504	0.0756833	0.0064069	0.00700102	0.00506635	0.00546174	0.0290655	0.0308414	0.00496597	0.00599813	0.219543	0.228889		281.2	-0.00279	0	-0.00938	0	-0.00351	0	-0.00738	0	-0.00689	0	-0.00407	0	-0.00139	0
281.4	0.0098399	0.00715092	0.0237755	0.0181509	0.138831	0.134012	0.832648	0.837892	0.383042	0.371685	0.00758383	0.0086517	0.0448354	0.0412362		281.4	0.486535	0.505676	0.0753367	0.0758181	0.00664696	0.00701761	0.0050292	0.00547509	0.0288724	0.0309096	0.00477113	0.00601267	0.219764	0.229093		281.4	-0.0026	0	-0.00973	0	-0.00361	0	-0.00741	0	-0.00641	0	-0.00367	0	-0.00088	0
281.6	0.00928612	0.00718529	0.0232689	0.0182376	0.139335	0.134616	0.834095	0.840016	0.384274	0.373147	0.00716611	0.00869321	0.0452241	0.0414303		281.6	0.487127	0.505715	0.0757475	0.0759518	0.00665189	0.00703409	0.00494651	0.00548835	0.0292896	0.0309773	0.00447427	0.00602713	0.220093	0.229294		281.6	-0.00252	0	-0.00936	0	-0.00353	0	-0.00764	0	-0.00598	0	-0.00339	0	-0.00067	0
281.8	0.00938323	0.00721966	0.0238802	0.0183243	0.140441	0.135219	0.836428	0.842129	0.386233	0.374607	0.00825487	0.00873473	0.0460028	0.0416243		281.8	0.487886	0.505753	0.0762607	0.0760844	0.00687377	0.00705047	0.00562025	0.00550154	0.0293145	0.0310445	0.00420458	0.0060415	0.220042	0.229492		281.8	-0.00213	0	-0.00863	0	-0.00346	0	-0.00731	0	-0.00555	0	-0.00223	0	-0.00039	0
282	0.00992893	0.00725403	0.024547	0.018411	0.141183	0.135822	0.838404	0.84423	0.387701	0.376063	0.00899679	0.00877624	0.0468075	0.0418183		282	0.488111	0.505791	0.0761966	0.0762158	0.00674679	0.00706675	0.00528203	0.00551464	0.0291723	0.0311112	0.00338358	0.00605578	0.220374	0.229687		282	-0.00261	0	-0.0085	0	-0.00354	0	-0.0075	0	-0.00577	0	-0.00194	0	-0.00097	0
282.2	0.0099751	0.0072884	0.0244461	0.0184976	0.141661	0.136424	0.840358	0.846319	0.38894	0.377517	0.00902221	0.00881775	0.0473227	0.0420123		282.2	0.48785	0.505827	0.0758602	0.0763461	0.00666427	0.00708293	0.00473134	0.00552767	0.0289703	0.0311776	0.0025817	0.00606997	0.219671	0.22988		282.2	-0.00257	0	-0.00871	0	-0.00348	0	-0.00751	0	-0.00522	0	-0.00153	0	-0.00073	0
282.4	0.0098727	0.00732276	0.0249852	0.0185843	0.142694	0.137027	0.84232	0.848396	0.390481	0.378968	0.00930287	0.00885926	0.048135	0.0422062		282.4	0.488082	0.505862	0.0759022	0.0764754	0.00662168	0.00709901	0.00437099	0.00554062	0.0289812	0.0312434	0.0022952	0.00608408	0.21934	0.23007		282.4	-0.00297	0	-0.00886	0	-0.00388	0	-0.00827	0	-0.00563	0	-0.00128	0	-0.00134	0
282.6	0.00970675	0.00735712	0.0248517	0.0186709	0.143435	0.137628	0.843837	0.850461	0.391553	0.380416	0.00936075	0.00890076	0.048448	0.0424001		282.6	0.488139	0.505896	0.0761784	0.0766035	0.00705427	0.00711499	0.00388903	0.00555349	0.0292948	0.0313088	0.00258797	0.0060981	0.219569	0.230258		282.6	-0.0027	0	-0.00886	0	-0.00375	0	-0.00782	0	-0.00554	0	-0.00072	0	-0.0018	0
282.8	0.00962828	0.00739148	0.0252566	0.0187575	0.144352	0.138229	0.845939	0.852515	0.39276	0.381862	0.00994616	0.00894226	0.048893	0.0425939		282.8	0.488471	0.505929	0.0765173	0.0767305	0.00685081	0.00713086	0.00387887	0.00556629	0.0291912	0.0313738	0.00205103	0.00611204	0.219987	0.230443		282.8	-0.00261	0	-0.00856	0	-0.00407	0	-0.00786	0	-0.00584	0	-0.00047	0	-0.00153	0
283	0.00926438	0.00742584	0.0250405	0.0188441	0.14474	0.13883	0.847563	0.854558	0.39409	0.383304	0.00982073	0.00898376	0.049536	0.0427876		283	0.487916	0.505962	0.0765637	0.0768565	0.00650972	0.00714664	0.00343563	0.005579	0.028926	0.0314383	0.00183012	0.00612589	0.219737	0.230626		283	-0.00257	0	-0.00848	0	-0.00352	0	-0.00734	0	-0.00591	0	-0.00029	0	-0.00157	0
283.2	0.00954958	0.0074602	0.0256242	0.0189307	0.145337	0.139431	0.850035	0.856588	0.395987	0.384744	0.0100559	0.00902526	0.0499639	0.0429813		283.2	0.487795	0.505993	0.0766957	0.0769814	0.00680123	0.00716232	0.00361097	0.00559164	0.0290992	0.0315024	0.00218414	0.00613966	0.220545	0.230806		283.2	-0.00233	0	-0.0082	0	-0.00299	0	-0.00704	0	-0.00591	0	-0.00037	0	-0.00196	0
283.4	0.00974648	0.00749455	0.0254509	0.0190173	0.145558	0.140031	0.851988	0.858607	0.396963	0.386182	0.0101168	0.00906675	0.0500757	0.043175		283.4	0.487905	0.506023	0.0771806	0.0771053	0.00678582	0.0071779	0.0033166	0.00560421	0.0292446	0.0315661	0.00259305	0.00615335	0.220939	0.230984		283.4	-0.00221	0	-0.00807	0	-0.00313	0	-0.0071	0	-0.00626	0	-0.00047	0	-0.00191	0
283.6	0.00964003	0.00752891	0.0255823	0.0191039	0.145991	0.140631	0.853665	0.860615	0.398328	0.387616	0.0102297	0.00910824	0.0500934	0.0433686		283.6	0.487521	0.506053	0.0773142	0.0772281	0.00735773	0.00719338	0.0036659	0.0056167	0.0292624	0.0316293	0.00274438	0.00616695	0.221612	0.231159		283.6	-0.00156	0	-0.00733	0	-0.00288	0	-0.00638	0	-0.00589	0	-0.0002	0	-0.00162	0
283.8	0.0092168	0.00756326	0.0252643	0.0191905	0.146042	0.14123	0.854845	0.862612	0.398996	0.389048	0.00966509	0.00914973	0.0494027	0.0435622		283.8	0.487854	0.506082	0.0776777	0.0773499	0.00750724	0.00720877	0.00354591	0.00562911	0.0296194	0.0316921	0.00336758	0.00618047	0.222191	0.231332		283.8	-0.00159	0	-0.00686	0	-0.00294	0	-0.00637	0	-0.0058	0	-0.00051	0	-0.00147	0
284	0.00911128	0.00759761	0.0251628	0.0192771	0.146448	0.141829	0.856639	0.864597	0.400375	0.390477	0.00944752	0.00919121	0.0496152	0.0437557		284	0.487992	0.50611	0.0778237	0.0774706	0.00696679	0.00722406	0.00345441	0.00564145	0.0296623	0.0317544	0.00322613	0.00619391	0.222331	0.231503		284	-0.00142	0	-0.00626	0	-0.00283	0	-0.00641	0	-0.00595	0	-0.00025	0	-0.00116	0
284.2	0.00872041	0.00763196	0.0245497	0.0193636	0.146351	0.142427	0.857892	0.866571	0.400931	0.391903	0.00863684	0.00923269	0.0491063	0.0439491		284.2	0.488687	0.506137	0.0778568	0.0775904	0.00709169	0.00723925	0.00356534	0.00565372	0.0296837	0.0318164	0.00373364	0.00620726	0.222247	0.231672		284.2	-0.00117	0	-0.00607	0	-0.00311	0	-0.00649	0	-0.00621	0	-0.00121	0	-0.00149	0
284.4	0.00863601	0.00766631	0.0245489	0.0194502	0.146427	0.143025	0.859113	0.868534	0.402723	0.393327	0.00805741	0.00927417	0.0485807	0.0441426		284.4	0.489333	0.506163	0.0783782	0.0777091	0.00741465	0.00725435	0.00396577	0.00566591	0.0301515	0.0318779	0.0037829	0.00622054	0.22269	0.231838		284.4	-0.00081	0	-0.00595	0	-0.00294	0	-0.00673	0	-0.00586	0	-0.00155	0	-0.00174	0
284.6	0.00850564	0.00770065	0.0247046	0.0195367	0.147172	0.143623	0.860758	0.870486	0.404208	0.394748	0.00780547	0.00931565	0.0489076	0.0443359		284.6	0.489168	0.506189	0.0778675	0.0778268	0.00744431	0.00726936	0.0034144	0.00567803	0.0303806	0.031939	0.00352569	0.00623373	0.222583	0.232002		284.6	-0.00124	0	-0.00608	0	-0.00282	0	-0.00689	0	-0.00655	0	-0.00214	0	-0.00171	0
284.8	0.00833096	0.00773499	0.0245204	0.0196233	0.147573	0.14422	0.862459	0.872427	0.405178	0.396166	0.00712495	0.00935713	0.0485883	0.0445292		284.8	0.48923	0.506214	0.0778322	0.0779435	0.00711927	0.00728427	0.00349286	0.00569008	0.03047	0.0319997	0.00309071	0.00624685	0.222324	0.232164		284.8	-0.00117	0	-0.00604	0	-0.00259	0	-0.00691	0	-0.00653	0	-0.00246	0	-0.00144	0
285	0.00830898	0.00776934	0.024713	0.0197098	0.148617	0.144817	0.864364	0.874357	0.406695	0.397581	0.00729005	0.0093986	0.0487535	0.0447225		285	0.489079	0.506238	0.0773102	0.0780592	0.00701097	0.00729909	0.0036441	0.00570205	0.0300955	0.0320599	0.00311109	0.00625988	0.222246	0.232323		285	-0.00064	0	-0.00606	0	-0.00262	0	-0.00659	0	-0.00619	0	-0.00258	0	-0.0013	0
285.2	0.00834184	0.00780368	0.0245299	0.0197963	0.149488	0.145414	0.866292	0.876276	0.407845	0.398994	0.00730077	0.00944007	0.0487318	0.0449158		285.2	0.489688	0.506262	0.076934	0.078174	0.00716608	0.00731382	0.00405833	0.00571395	0.0302746	0.0321198	0.00318609	0.00627284	0.222113	0.232481		285.2	-0.00095	0	-0.00615	0	-0.00233	0	-0.00688	0	-0.00566	0	-0.00284	0	-0.00087	0
285.4	0.00871487	0.00783801	0.0244068	0.0198828	0.150464	0.14601	0.868494	0.878184	0.409332	0.400404	0.00802	0.00948153	0.0486905	0.0451089		285.4	0.489832	0.506285	0.0774375	0.0782878	0.00740033	0.00732845	0.00474613	0.00572579	0.0303366	0.0321793	0.00317783	0.00628572	0.222681	0.232636		285.4	-0.00123	0	-0.00674	0	-0.00266	0	-0.00733	0	-0.00556	0	-0.00283	0	-0.00078	0
285.6	0.00835776	0.00787235	0.0242553	0.0199693	0.150752	0.146606	0.869854	0.880082	0.409751	0.401811	0.00776816	0.009523	0.0485159	0.0453021		285.6	0.490012	0.506307	0.0770044	0.0784006	0.00716736	0.00734299	0.00458476	0.00573755	0.0304772	0.0322383	0.0028176	0.00629852	0.222299	0.232789		285.6	-0.00147	0	-0.00694	0	-0.00297	0	-0.00745	0	-0.00547	0	-0.00317	0	-0.0009	0
285.8	0.00882726	0.00790669	0.0246118	0.0200558	0.15142	0.147201	0.871522	0.881969	0.411088	0.403216	0.00816474	0.00956446	0.0489452	0.0454951		285.8	0.490236	0.506329	0.0773619	0.0785124	0.00731346	0.00735745	0.00514443	0.00574923	0.0307399	0.032297	0.00292318	0.00631124	0.222223	0.232941		285.8	-0.00176	0	-0.00721	0	-0.00354	0	-0.00731	0	-0.00557	0	-0.00343	0	-0.00153	0
286	0.0096221	0.00794102	0.0248379	0.0201422	0.152178	0.147796	0.873625	0.883845	0.412498	0.404618	0.00847078	0.00960592	0.0493053	0.0456882		286	0.490045	0.50635	0.077237	0.0786234	0.0070702	0.00737181	0.00431273	0.00576085	0.0308952	0.0323552	0.0026052	0.00632388	0.222472	0.23309		286	-0.00258	0	-0.00803	0	-0.00386	0	-0.00775	0	-0.00576	0	-0.0041	0	-0.00215	0
286.2	0.00947411	0.00797535	0.0244996	0.0202287	0.152384	0.14839	0.874931	0.88571	0.413873	0.406017	0.00820742	0.00964737	0.0491856	0.0458812		286.2	0.489946	0.506371	0.0771533	0.0787334	0.00696067	0.00738608	0.00444128	0.0057724	0.0308437	0.0324131	0.00268726	0.00633645	0.222355	0.233237		286.2	-0.00263	0	-0.00836	0	-0.00377	0	-0.00761	0	-0.0055	0	-0.00405	0	-0.00193	0
286.4	0.00907772	0.00800968	0.0243281	0.0203152	0.152671	0.148984	0.876457	0.887565	0.414805	0.407413	0.00797619	0.00968883	0.0493702	0.0460741		286.4	0.490241	0.50639	0.0774018	0.0788424	0.00712694	0.00740026	0.00415272	0.00578388	0.0307956	0.0324705	0.00243696	0.00634894	0.222759	0.233383		286.4	-0.00307	0	-0.0091	0	-0.00393	0	-0.00807	0	-0.00607	0	-0.00436	0	-0.00244	0
286.6	0.00951743	0.00804401	0.0241116	0.0204016	0.15265	0.149578	0.878125	0.88941	0.415759	0.408807	0.00791569	0.00973028	0.0490385	0.046267		286.6	0.490246	0.50641	0.0777782	0.0789505	0.00729278	0.00741436	0.00395178	0.00579529	0.0311683	0.0325276	0.00273138	0.00636136	0.222963	0.233526		286.6	-0.00294	0	-0.00954	0	-0.00425	0	-0.00804	0	-0.00631	0	-0.00452	0	-0.00272	0
286.8	0.00939051	0.00807834	0.0241835	0.020488	0.15315	0.150172	0.880022	0.891244	0.417348	0.410199	0.00842072	0.00977173	0.049639	0.0464598		286.8	0.48986	0.506429	0.0775065	0.0790578	0.00674053	0.00742836	0.00366318	0.00580664	0.0307108	0.0325843	0.00239158	0.0063737	0.222873	0.233667		286.8	-0.00319	0	-0.00984	0	-0.00416	0	-0.00842	0	-0.00692	0	-0.005	0	-0.00287	0
287	0.00948312	0.00811266	0.0241441	0.0205745	0.153328	0.150764	0.881996	0.893068	0.41856	0.411587	0.00804936	0.00981317	0.0499055	0.0466526		287	0.489237	0.506447	0.0770794	0.0791641	0.00663384	0.00744228	0.00308918	0.00581791	0.0305225	0.0326406	0.00242262	0.00638597	0.223319	0.233807		287	-0.00336	0	-0.01018	0	-0.00345	0	-0.00823	0	-0.0068	0	-0.00483	0	-0.0035	0
287.2	0.00921033	0.00814699	0.0244676	0.0206609	0.153654	0.151357	0.883625	0.894881	0.419803	0.412973	0.00816428	0.00985461	0.0501196	0.0468454		287.2	0.489293	0.506465	0.0774219	0.0792695	0.00747407	0.00745611	0.0039761	0.00582912	0.0305403	0.0326965	0.00311503	0.00639816	0.224151	0.233944		287.2	-0.00328	0	-0.01052	0	-0.00367	0	-0.00822	0	-0.00691	0	-0.00465	0	-0.00335	0
287.4	0.00898877	0.00818131	0.0246613	0.0207473	0.153888	0.151949	0.885202	0.896685	0.421024	0.414356	0.00854276	0.00989605	0.0505129	0.0470381		287.4	0.488999	0.506482	0.0779251	0.079374	0.00730162	0.00746986	0.00393686	0.00584026	0.0300837	0.032752	0.0029908	0.00641028	0.224279	0.23408		287.4	-0.00328	0	-0.01097	0	-0.00431	0	-0.00799	0	-0.00717	0	-0.00432	0	-0.00311	0
287.6	0.00849873	0.00821563	0.0248781	0.0208337	0.154575	0.152541	0.88662	0.898478	0.422483	0.415737	0.00872315	0.00993749	0.0508161	0.0472307		287.6	0.48854	0.506499	0.0779158	0.0794777	0.00729371	0.00748352	0.00404794	0.00585133	0.0299586	0.0328072	0.00305188	0.00642232	0.224658	0.234214		287.6	-0.00327	0	-0.01064	0	-0.00414	0	-0.008	0	-0.00704	0	-0.00411	0	-0.00312	0
287.8	0.00856277	0.00824995	0.0246956	0.0209201	0.155073	0.153132	0.88822	0.900261	0.42378	0.417115	0.00872961	0.00997893	0.0511438	0.0474233		287.8	0.488594	0.506515	0.0779929	0.0795804	0.00711477	0.00749709	0.00367459	0.00586234	0.0296295	0.032862	0.00290719	0.00643429	0.224927	0.234346		287.8	-0.00373	0	-0.01128	0	-0.0047	0	-0.00845	0	-0.00762	0	-0.00402	0	-0.00355	0
288	0.00880101	0.00828426	0.0245061	0.0210064	0.15522	0.153723	0.889658	0.902034	0.425373	0.418491	0.00884053	0.0100204	0.0513512	0.0476159		288	0.488554	0.506531	0.0783574	0.0796823	0.00695185	0.00751058	0.00354091	0.00587328	0.0298163	0.0329164	0.00318792	0.00644619	0.22504	0.234477		288	-0.00421	0	-0.01159	0	-0.00465	0	-0.00886	0	-0.008	0	-0.00414	0	-0.00379	0
288.2	0.00880966	0.00831858	0.0243153	0.0210928	0.155215	0.154314	0.890971	0.903797	0.426668	0.419863	0.00891431	0.0100618	0.05131	0.0478084		288.2	0.488821	0.506546	0.0787237	0.0797834	0.00734204	0.00752398	0.00372085	0.00588415	0.0297801	0.0329704	0.00358172	0.00645802	0.225138	0.234606		288.2	-0.00453	0	-0.01219	0	-0.00499	0	-0.00881	0	-0.00808	0	-0.00454	0	-0.00386	0
288.4	0.0096242	0.00835289	0.0252439	0.0211792	0.15654	0.154904	0.89325	0.90555	0.428821	0.421233	0.00970592	0.0101032	0.0525038	0.0480008		288.4	0.488562	0.506561	0.0788825	0.0798836	0.00775835	0.00753731	0.00342375	0.00589496	0.0298499	0.0330241	0.00312764	0.00646977	0.225816	0.234732		288.4	-0.00465	0	-0.01178	0	-0.00463	0	-0.00847	0	-0.00799	0	-0.00351	0	-0.00335	0
288.6	0.00952798	0.00838721	0.0255427	0.0212655	0.157482	0.155494	0.895229	0.907293	0.430041	0.422601	0.00995016	0.0101446	0.0529119	0.0481933		288.6	0.488623	0.506576	0.0786195	0.0799829	0.00752307	0.00755054	0.00293917	0.00590571	0.0296599	0.0330774	0.00294611	0.00648145	0.22562	0.234858		288.6	-0.00496	0	-0.01155	0	-0.00516	0	-0.00868	0	-0.0085	0	-0.00349	0	-0.00356	0
288.8	0.00957869	0.00842152	0.0261348	0.0213518	0.15853	0.156083	0.897013	0.909027	0.431412	0.423966	0.010151	0.0101861	0.0529357	0.0483856		288.8	0.488796	0.50659	0.0787809	0.0800814	0.00771496	0.0075637	0.00299715	0.00591638	0.0295236	0.0331303	0.00287561	0.00649307	0.225659	0.234981		288.8	-0.00469	0	-0.01127	0	-0.00512	0	-0.00838	0	-0.00826	0	-0.00299	0	-0.00345	0
289	0.00977671	0.00845582	0.026794	0.0214382	0.159524	0.156672	0.898643	0.91075	0.433261	0.425328	0.0108246	0.0102275	0.0534306	0.0485779		289	0.488822	0.506604	0.0780689	0.0801791	0.00786525	0.00757677	0.00295613	0.005927	0.0291184	0.0331829	0.00289478	0.00650461	0.225445	0.235103		289	-0.00467	0	-0.01089	0	-0.00514	0	-0.00835	0	-0.00774	0	-0.00272	0	-0.00354	0
289.2	0.0101161	0.00849013	0.0273779	0.0215245	0.160412	0.157261	0.900658	0.912464	0.434635	0.426688	0.0115129	0.0102689	0.0536231	0.0487702		289.2	0.488824	0.506617	0.0775375	0.0802759	0.00780442	0.00758976	0.00286309	0.00593755	0.0287251	0.0332351	0.00241871	0.00651608	0.224886	0.235224		289.2	-0.00512	0	-0.01096	0	-0.00553	0	-0.00819	0	-0.00815	0	-0.00287	0	-0.00353	0
289.4	0.0106206	0.00852444	0.0277514	0.0216108	0.161784	0.157849	0.902605	0.914168	0.436778	0.428045	0.0116224	0.0103103	0.0543278	0.0489624		289.4	0.489076	0.50663	0.0778922	0.0803719	0.00819802	0.00760267	0.00307859	0.00594804	0.0293222	0.033287	0.00240216	0.00652748	0.225005	0.235342		289.4	-0.00484	0	-0.01113	0	-0.00539	0	-0.00803	0	-0.00818	0	-0.00277	0	-0.00321	0
289.6	0.0107596	0.00855874	0.0279386	0.0216971	0.162403	0.158437	0.903808	0.915863	0.438132	0.429399	0.0115949	0.0103517	0.0543145	0.0491546		289.6	0.489409	0.506643	0.0776948	0.0804671	0.00824292	0.0076155	0.00301324	0.00595847	0.0295814	0.0333385	0.00229098	0.00653882	0.225015	0.235459		289.6	-0.00424	0	-0.01067	0	-0.00519	0	-0.00754	0	-0.00773	0	-0.00263	0	-0.00242	0
289.8	0.0113645	0.00859304	0.0281447	0.0217834	0.163468	0.159024	0.905852	0.917548	0.440615	0.430751	0.0119936	0.0103931	0.0546628	0.0493467		289.8	0.489746	0.506655	0.077883	0.0805615	0.00851885	0.00762825	0.00323812	0.00596883	0.0298959	0.0333897	0.00223451	0.00655008	0.225468	0.235575		289.8	-0.00442	0	-0.00998	0	-0.00508	0	-0.00699	0	-0.00776	0	-0.00249	0	-0.00232	0
290	0.0113364	0.00862734	0.0283507	0.0218697	0.164577	0.159612	0.907623	0.919223	0.442382	0.432101	0.0120503	0.0104345	0.0549267	0.0495388		290	0.490377	0.506667	0.0778413	0.0806551	0.00893297	0.00764092	0.0034151	0.00597913	0.0298892	0.0334405	0.00233945	0.00656128	0.226302	0.235689		290	-0.0039	0	-0.00946	0	-0.0046	0	-0.00632	0	-0.00707	0	-0.00226	0	-0.00143	0
290.2	0.0112569	0.00866164	0.0287193	0.021956	0.164784	0.160198	0.908756	0.920889	0.443958	0.433447	0.0118951	0.0104759	0.0548035	0.0497308		290.2	0.49049	0.506678	0.0779441	0.080748	0.00858962	0.00765351	0.00313596	0.00598937	0.0294423	0.033491	0.00227747	0.00657241	0.226164	0.235801		290.2	-0.00317	0	-0.00886	0	-0.00388	0	-0.00565	0	-0.0063	0	-0.00208	0	-0.00066	0
290.4	0.0115315	0.00869594	0.0284865	0.0220422	0.164974	0.160784	0.909975	0.922546	0.445172	0.434792	0.0116739	0.0105173	0.0548436	0.0499228		290.4	0.490411	0.50669	0.0782452	0.08084	0.00887797	0.00766602	0.00272984	0.00599955	0.0301982	0.0335411	0.0021516	0.00658347	0.226475	0.235912		290.4	-0.00246	0	-0.00848	0	-0.00324	0	-0.00528	0	-0.00601	0	-0.00174	0	-0.00018	0
290.6	0.0119212	0.00873023	0.028679	0.0221285	0.165552	0.16137	0.911395	0.924193	0.446731	0.436133	0.0118343	0.0105587	0.0550188	0.0501147		290.6	0.489798	0.506701	0.0776918	0.0809313	0.00855872	0.00767846	0.00279736	0.00600966	0.0307544	0.0335909	0.00199163	0.00659446	0.226162	0.236022		290.6	-0.00166	0	-0.00758	0	-0.00271	0	-0.00495	0	-0.00556	0	-0.00104	0	0.000472	0
290.8	0.0120155	0.00876452	0.0287205	0.0222147	0.166408	0.161956	0.912996	0.925831	0.448252	0.437472	0.0121198	0.0106001	0.0556375	0.0503066		290.8	0.48977	0.506711	0.0775137	0.0810217	0.00801843	0.00769081	0.00275086	0.00601972	0.0305841	0.0336404	0.00224966	0.00660539	0.225891	0.23613		290.8	-0.00098	0	-0.00671	0	-0.00171	0	-0.00446	0	-0.00509	0	-0.00033	0	0.000782	0
291	0.0120486	0.00879882	0.0285861	0.022301	0.166539	0.162541	0.914479	0.92746	0.449182	0.438809	0.0114956	0.0106415	0.055902	0.0504985		291	0.489796	0.506722	0.0772463	0.0811115	0.00835772	0.00770309	0.00265078	0.00602971	0.0308002	0.0336895	0.0023465	0.00661625	0.226203	0.236236		291	-0.00075	0	-0.00625	0	-0.00177	0	-0.00407	0	-0.00475	0	-4.4e-05	0	0.000592	0
291.2	0.0116246	0.00883311	0.0283693	0.0223872	0.166775	0.163126	0.915335	0.92908	0.450189	0.440143	0.0112341	0.0106829	0.0559638	0.0506902		291.2	0.490019	0.506732	0.0777758	0.0812004	0.00838179	0.00771529	0.00339389	0.00603965	0.0310431	0.0337383	0.00242529	0.00662705	0.226127	0.236341		291.2	-0.00028	0	-0.00622	0	-0.00152	0	-0.00341	0	-0.0044	0	0.000199	0	0.001022	0
291.4	0.0116077	0.00886739	0.0281584	0.0224734	0.167335	0.16371	0.916877	0.93069	0.451995	0.441474	0.0111109	0.0107243	0.0560548	0.050882		291.4	0.489658	0.506741	0.0776118	0.0812886	0.00740661	0.00772742	0.00297236	0.00604953	0.0301349	0.0337867	0.00245722	0.00663778	0.226095	0.236445		291.4	-0.00011	0	-0.00674	0	-0.00195	0	-0.00381	0	-0.00492	0	-5e-05	0	0.000463	0
291.6	0.0110018	0.00890168	0.0275456	0.0225596	0.16763	0.164294	0.917895	0.932292	0.452969	0.442803	0.0109792	0.0107657	0.0556262	0.0510737		291.6	0.489851	0.506751	0.0777978	0.0813761	0.007168	0.00773947	0.00323269	0.00605934	0.0304048	0.0338348	0.00314112	0.00664844	0.226187	0.236547		291.6	-0.00022	0	-0.00684	0	-0.0021	0	-0.00458	0	-0.00517	0	-0.00039	0	-0.0003	0
291.8	0.0113703	0.00893597	0.0273585	0.0226458	0.168143	0.164878	0.919502	0.933884	0.454576	0.444129	0.0108755	0.0108071	0.0557206	0.0512653		291.8	0.489966	0.50676	0.0778319	0.0814628	0.00679698	0.00775144	0.00290739	0.0060691	0.0299055	0.0338827	0.00296686	0.00665904	0.225864	0.236648		291.8	-0.00066	0	-0.00724	0	-0.00247	0	-0.00512	0	-0.00567	0	-0.00101	0	-0.00078	0
292	0.0114385	0.00897025	0.0273349	0.022732	0.168211	0.165461	0.920788	0.935468	0.456025	0.445453	0.0111143	0.0108484	0.0557747	0.0514569		292	0.490771	0.506769	0.0785379	0.0815488	0.00746011	0.00776334	0.00337388	0.0060788	0.030292	0.0339301	0.0038578	0.00666958	0.226261	0.236748		292	-0.00098	0	-0.00742	0	-0.00223	0	-0.0054	0	-0.00531	0	-0.00114	0	-0.00087	0
292.2	0.0116759	0.00900453	0.0275675	0.0228182	0.168623	0.166044	0.92212	0.937042	0.45706	0.446774	0.0115336	0.0108898	0.0558709	0.0516485		292.2	0.491521	0.506778	0.0788098	0.0816341	0.00749133	0.00777517	0.00368606	0.00608844	0.0298032	0.0339773	0.00371493	0.00668005	0.225909	0.236846		292.2	-0.00152	0	-0.00814	0	-0.00291	0	-0.00606	0	-0.0057	0	-0.00152	0	-0.00114	0
292.4	0.0117635	0.00903881	0.0283535	0.0229043	0.169533	0.166626	0.923606	0.938608	0.4585	0.448093	0.0117591	0.0109312	0.0563941	0.05184		292.4	0.49178	0.506786	0.0790016	0.0817186	0.00766349	0.00778692	0.00336882	0.00609802	0.029751	0.0340241	0.00382327	0.00669046	0.226014	0.236943		292.4	-0.00109	0	-0.00796	0	-0.00284	0	-0.00606	0	-0.0058	0	-0.00092	0	-0.00158	0
292.6	0.0112162	0.00907309	0.0283968	0.0229905	0.169711	0.167208	0.924872	0.940164	0.459239	0.449409	0.0112217	0.0109726	0.0562099	0.0520314		292.6	0.492341	0.506795	0.0791146	0.0818025	0.00747047	0.0077986	0.00342675	0.00610755	0.0299134	0.0340706	0.00400105	0.0067008	0.225907	0.237039		292.6	-0.00133	0	-0.00879	0	-0.00332	0	-0.00707	0	-0.00588	0	-0.00106	0	-0.00206	0
292.8	0.0116713	0.00910737	0.0294347	0.0230766	0.171347	0.16779	0.92676	0.941712	0.461215	0.450723	0.011955	0.0110139	0.0571565	0.0522228		292.8	0.492719	0.506803	0.0792091	0.0818856	0.00761196	0.0078102	0.00351779	0.00611702	0.0299277	0.0341168	0.00418854	0.00671108	0.225954	0.237133		292.8	-0.00172	0	-0.00913	0	-0.0036	0	-0.00711	0	-0.00592	0	-0.00117	0	-0.00262	0
293	0.0121288	0.00914164	0.0302746	0.0231628	0.172454	0.168371	0.928696	0.943252	0.463265	0.452034	0.0123276	0.0110553	0.0580642	0.0524142		293	0.493002	0.50681	0.0793408	0.081968	0.0076425	0.00782174	0.0034234	0.00612643	0.0299656	0.0341627	0.00400067	0.0067213	0.225689	0.237226		293	-0.00242	0	-0.00972	0	-0.00397	0	-0.00767	0	-0.0066	0	-0.00193	0	-0.00317	0
293.2	0.0124659	0.00917592	0.0312773	0.0232489	0.173623	0.168952	0.931195	0.944782	0.464797	0.453343	0.0128486	0.0110967	0.059071	0.0526055		293.2	0.493831	0.506818	0.0801687	0.0820497	0.00795033	0.0078332	0.00361523	0.00613578	0.0303878	0.0342082	0.00419893	0.00673146	0.225718	0.237318		293.2	-0.00294	0	-0.01046	0	-0.00395	0	-0.00781	0	-0.00708	0	-0.00221	0	-0.00298	0
293.4	0.0130151	0.00921019	0.031804	0.023335	0.175002	0.169532	0.932967	0.946304	0.466717	0.454649	0.0128135	0.011138	0.0598388	0.0527968		293.4	0.494371	0.506825	0.0805909	0.0821308	0.00818028	0.00784459	0.00385455	0.00614508	0.0307111	0.0342535	0.00415493	0.00674156	0.225975	0.237409		293.4	-0.00348	0	-0.01078	0	-0.00405	0	-0.00858	0	-0.0074	0	-0.00258	0	-0.00331	0
293.6	0.0130968	0.00924446	0.0324261	0.0234211	0.176101	0.170112	0.934808	0.947818	0.468589	0.455952	0.0132627	0.0111794	0.0600859	0.052988		293.6	0.494917	0.506832	0.0805985	0.0822111	0.00784179	0.00785591	0.00404966	0.00615432	0.0305185	0.0342984	0.00407078	0.00675159	0.226337	0.237498		293.6	-0.0044	0	-0.01117	0	-0.00466	0	-0.00881	0	-0.00788	0	-0.00297	0	-0.00348	0
293.8	0.0138528	0.00927873	0.0336502	0.0235072	0.17754	0.170692	0.937346	0.949322	0.471071	0.457254	0.0142889	0.0112207	0.0611802	0.0531792		293.8	0.495043	0.506839	0.0805191	0.0822908	0.00823862	0.00786715	0.00393067	0.00616351	0.030821	0.0343431	0.00387971	0.00676157	0.226715	0.237587		293.8	-0.00516	0	-0.01102	0	-0.00522	0	-0.00875	0	-0.00834	0	-0.00357	0	-0.00374	0
294	0.0133495	0.00931299	0.0335775	0.0235933	0.17779	0.171271	0.938144	0.950819	0.471751	0.458552	0.0141278	0.0112621	0.0615615	0.0533703		294	0.495587	0.506846	0.0807568	0.0823698	0.00785378	0.00787833	0.00419579	0.00617264	0.0308199	0.0343874	0.00410358	0.00677148	0.227202	0.237674		294	-0.00512	0	-0.01085	0	-0.0051	0	-0.00832	0	-0.00811	0	-0.0034	0	-0.00364	0
294.2	0.013832	0.00934726	0.0341876	0.0236794	0.178295	0.17185	0.939569	0.952307	0.473628	0.459849	0.0145835	0.0113034	0.0622118	0.0535614		294.2	0.495378	0.506853	0.0808222	0.0824481	0.00771937	0.00788944	0.00392459	0.00618172	0.0312926	0.0344315	0.00394473	0.00678134	0.226991	0.23776		294.2	-0.00433	0	-0.00982	0	-0.00409	0	-0.00718	0	-0.00743	0	-0.00239	0	-0.00269	0
294.4	0.0144645	0.00938152	0.0342613	0.0237655	0.178618	0.172429	0.941038	0.953786	0.475022	0.461142	0.0148899	0.0113448	0.0627046	0.0537524		294.4	0.495289	0.506859	0.0803294	0.0825258	0.0081741	0.00790047	0.00428153	0.00619074	0.0318051	0.0344752	0.00388205	0.00679113	0.22721	0.237844		294.4	-0.00379	0	-0.00893	0	-0.00358	0	-0.00664	0	-0.00664	0	-0.00193	0	-0.00196	0
294.6	0.0148561	0.00941578	0.0346	0.0238515	0.179439	0.173007	0.942684	0.955257	0.476275	0.462434	0.0154534	0.0113861	0.0631936	0.0539434		294.6	0.494721	0.506865	0.0796368	0.0826028	0.00757629	0.00791144	0.00402404	0.00619971	0.0313066	0.0345186	0.00354383	0.00680086	0.226757	0.237928		294.6	-0.00315	0	-0.00876	0	-0.00317	0	-0.00657	0	-0.0065	0	-0.00167	0	-0.00127	0
294.8	0.0154058	0.00945004	0.0350944	0.0239376	0.179818	0.173585	0.944121	0.95672	0.477467	0.463722	0.016233	0.0114275	0.0630982	0.0541343		294.8	0.494984	0.506871	0.0793373	0.0826792	0.00745513	0.00792234	0.00379354	0.00620863	0.0310314	0.0345618	0.00389879	0.00681054	0.226845	0.23801		294.8	-0.00324	0	-0.0084	0	-0.00296	0	-0.00613	0	-0.00642	0	-0.00185	0	-0.00126	0
295	0.0154851	0.0094843	0.0351641	0.0240237	0.180013	0.174162	0.945695	0.958175	0.478091	0.465009	0.0161993	0.0114688	0.0628759	0.0543252		295	0.494298	0.506877	0.0786089	0.0827549	0.00760318	0.00793318	0.0035636	0.00621749	0.0307769	0.0346046	0.00341394	0.00682016	0.226363	0.238092		295	-0.00302	0	-0.00815	0	-0.00304	0	-0.00582	0	-0.00645	0	-0.00156	0	-0.00112	0
295.2	0.0158275	0.00951856	0.0350502	0.0241097	0.180797	0.174739	0.946926	0.959621	0.479618	0.466293	0.0165081	0.0115101	0.0626678	0.054516		295.2	0.493699	0.506883	0.0782082	0.08283	0.00692557	0.00794394	0.00345453	0.0062263	0.0301259	0.0346472	0.00297469	0.00682972	0.226159	0.238172		295.2	-0.00255	0	-0.00817	0	-0.0028	0	-0.00539	0	-0.00656	0	-0.00126	0	-0.00072	0
295.4	0.0156824	0.00955281	0.0351554	0.0241957	0.181181	0.175316	0.948551	0.96106	0.480926	0.467574	0.0165067	0.0115515	0.0621279	0.0547068		295.4	0.49356	0.506888	0.0780196	0.0829044	0.0068588	0.00795464	0.00349123	0.00623505	0.0296772	0.0346895	0.00331423	0.00683922	0.2268	0.238251		295.4	-0.00282	0	-0.00813	0	-0.00356	0	-0.00596	0	-0.00752	0	-0.00192	0	-0.00119	0
295.6	0.0154613	0.00958706	0.0351286	0.0242817	0.181447	0.175892	0.949576	0.96249	0.482032	0.468853	0.0168557	0.0115928	0.0621447	0.0548975		295.6	0.49379	0.506894	0.0785328	0.0829782	0.00691973	0.00796527	0.00398903	0.00624375	0.0299014	0.0347314	0.00331654	0.00684866	0.226725	0.238329		295.6	-0.00218	0	-0.0079	0	-0.00331	0	-0.00557	0	-0.00712	0	-0.00163	0	-0.00097	0
295.8	0.0157301	0.00962132	0.0353742	0.0243677	0.182047	0.176468	0.950565	0.963912	0.48358	0.47013	0.017019	0.0116341	0.0625527	0.0550882		295.8	0.493573	0.506899	0.0781023	0.0830514	0.00715797	0.00797583	0.00386727	0.0062524	0.0293241	0.0347731	0.00323038	0.00685804	0.226832	0.238407		295.8	-0.00191	0	-0.00791	0	-0.00339	0	-0.00537	0	-0.00711	0	-0.0017	0	-0.00078	0
296	0.0157533	0.00965557	0.0353161	0.0244537	0.182538	0.177043	0.951406	0.965326	0.484257	0.471404	0.0174066	0.0116755	0.0628652	0.0552789		296	0.494307	0.506904	0.0790902	0.083124	0.00781483	0.00798633	0.004594	0.006261	0.030045	0.0348146	0.00388203	0.00686737	0.227821	0.238483		296	-0.00158	0	-0.0079	0	-0.00376	0	-0.00565	0	-0.00694	0	-0.00149	0	-0.00099	0
296.2	0.0156299	0.00968981	0.0358098	0.0245397	0.183302	0.177618	0.952681	0.966732	0.485519	0.472675	0.0171615	0.0117168	0.06267	0.0554695		296.2	0.494709	0.506909	0.0798545	0.0831959	0.00791499	0.00799676	0.0051464	0.00626955	0.0299513	0.0348557	0.00383921	0.00687665	0.228226	0.238558		296.2	-0.00152	0	-0.00815	0	-0.0043	0	-0.00597	0	-0.00704	0	-0.0017	0	-0.00094	0
296.4	0.0157857	0.00972406	0.0358035	0.0246257	0.184184	0.178193	0.95407	0.96813	0.487061	0.473945	0.0167926	0.0117581	0.0631319	0.05566		296.4	0.494237	0.506914	0.080245	0.0832673	0.00820483	0.00800713	0.00516069	0.00627804	0.0307415	0.0348965	0.00447292	0.00688586	0.228473	0.238632		296.4	-0.00063	0	-0.00776	0	-0.00358	0	-0.00532	0	-0.00652	0	-0.00089	0	-0.00061	0
296.6	0.0161202	0.00975831	0.0357538	0.0247117	0.185205	0.178767	0.955862	0.96952	0.488209	0.475211	0.0167927	0.0117994	0.0635184	0.0558505		296.6	0.494198	0.506918	0.0803154	0.083338	0.00832255	0.00801743	0.00534792	0.00628649	0.0306702	0.0349371	0.00459543	0.00689502	0.228682	0.238705		296.6	-0.00064	0	-0.00793	0	-0.0038	0	-0.00598	0	-0.00624	0	-0.00088	0	-0.00059	0
296.8	0.016568	0.00979255	0.0363706	0.0247976	0.186315	0.179341	0.957125	0.970903	0.490002	0.476476	0.0171399	0.0118407	0.0640715	0.056041		296.8	0.494372	0.506923	0.0809717	0.0834082	0.00902583	0.00802767	0.00545558	0.00629488	0.0306003	0.0349774	0.00492906	0.00690413	0.229264	0.238777		296.8	-0.00121	0	-0.00836	0	-0.00449	0	-0.00672	0	-0.00693	0	-0.00171	0	-0.00158	0
297	0.0168765	0.00982679	0.0365229	0.0248836	0.1871	0.179915	0.958513	0.972278	0.491159	0.477738	0.0172621	0.011882	0.0643776	0.0562314		297	0.494169	0.506927	0.0813548	0.0834777	0.00895974	0.00803784	0.00528994	0.00630323	0.030547	0.0350174	0.00452967	0.00691318	0.228918	0.238848		297	-0.00136	0	-0.00813	0	-0.00473	0	-0.00677	0	-0.00697	0	-0.00178	0	-0.00165	0
297.2	0.0166809	0.00986103	0.0365799	0.0249695	0.187573	0.180488	0.959999	0.973644	0.492459	0.478997	0.017408	0.0119233	0.0647789	0.0564218		297.2	0.494226	0.506932	0.0815719	0.0835467	0.00893475	0.00804795	0.00512284	0.00631152	0.0303603	0.0350572	0.00441016	0.00692217	0.228666	0.238918		297.2	-0.00144	0	-0.00828	0	-0.00471	0	-0.00713	0	-0.00692	0	-0.00182	0	-0.00154	0
297.4	0.0168186	0.00989527	0.0365946	0.0250554	0.188579	0.181061	0.961131	0.975004	0.494103	0.480254	0.0173657	0.0119647	0.0651385	0.0566121		297.4	0.49416	0.506936	0.0812404	0.0836151	0.00935818	0.008058	0.00552358	0.00631976	0.0306867	0.0350967	0.00468199	0.00693111	0.229277	0.238987		297.4	-0.00175	0	-0.00795	0	-0.00527	0	-0.00781	0	-0.00748	0	-0.00226	0	-0.00249	0
297.6	0.017064	0.00992951	0.0366926	0.0251414	0.18935	0.181633	0.962429	0.976355	0.496	0.481509	0.0174309	0.012006	0.0657734	0.0568023		297.6	0.494488	0.50694	0.0812495	0.0836829	0.00875223	0.00806799	0.00526077	0.00632796	0.0309045	0.0351359	0.00469128	0.00694	0.229391	0.239056		297.6	-0.00198	0	-0.00843	0	-0.00602	0	-0.00846	0	-0.00806	0	-0.00307	0	-0.00285	0
297.8	0.0170786	0.00996374	0.0369015	0.0252273	0.18965	0.182205	0.963764	0.977699	0.497559	0.482762	0.0175756	0.0120473	0.0666315	0.0569926		297.8	0.494172	0.506944	0.081126	0.0837501	0.00882836	0.00807791	0.00495918	0.0063361	0.0310271	0.0351749	0.00435564	0.00694883	0.229022	0.239123		297.8	-0.00222	0	-0.00825	0	-0.0065	0	-0.00885	0	-0.00822	0	-0.00352	0	-0.00332	0
298	0.0164829	0.00999797	0.0360277	0.0253132	0.189668	0.182777	0.964219	0.979035	0.498323	0.484011	0.0172677	0.0120886	0.0662911	0.0571827		298	0.494301	0.506948	0.0808338	0.0838168	0.0082414	0.00808777	0.00485594	0.0063442	0.0310263	0.0352135	0.00439249	0.00695761	0.228634	0.23919		298	-0.00189	0	-0.00771	0	-0.00634	0	-0.00828	0	-0.00784	0	-0.00275	0	-0.00318	0
298.2	0.016913	0.0100322	0.0363243	0.0253991	0.190487	0.183348	0.965657	0.980364	0.499881	0.485259	0.017567	0.0121299	0.0668733	0.0573729		298.2	0.494665	0.506951	0.0808002	0.0838829	0.00859203	0.00809757	0.00517712	0.00635225	0.0313265	0.0352519	0.00441812	0.00696633	0.228845	0.239255		298.2	-0.00138	0	-0.0076	0	-0.00594	0	-0.00825	0	-0.00719	0	-0.00289	0	-0.00279	0
298.4	0.0171466	0.0100664	0.0364678	0.0254849	0.190977	0.183919	0.967265	0.981686	0.500888	0.486504	0.0179078	0.0121712	0.066746	0.0575629		298.4	0.494818	0.506955	0.08013	0.0839484	0.00836858	0.0081073	0.00485181	0.00636025	0.0312102	0.0352901	0.00441675	0.006975	0.228913	0.23932		298.4	-0.00243	0	-0.00882	0	-0.00626	0	-0.00917	0	-0.00761	0	-0.00419	0	-0.00336	0
298.6	0.0172047	0.0101007	0.0366248	0.0255708	0.191803	0.18449	0.96866	0.982999	0.502068	0.487747	0.018402	0.0122124	0.0667553	0.057753		298.6	0.49467	0.506958	0.0794704	0.0840135	0.00796082	0.00811698	0.00405914	0.0063682	0.0309011	0.035328	0.00400972	0.00698362	0.22848	0.239384		298.6	-0.00244	0	-0.00901	0	-0.00613	0	-0.00897	0	-0.00802	0	-0.00425	0	-0.00324	0
298.8	0.0171443	0.0101349	0.0366951	0.0256567	0.191572	0.18506	0.96927	0.984306	0.502759	0.488988	0.0180192	0.0122537	0.0661363	0.057943		298.8	0.495122	0.506962	0.0792713	0.0840779	0.00802146	0.0081266	0.00425221	0.0063761	0.0312148	0.0353656	0.00404599	0.00699219	0.228653	0.239447		298.8	-0.00237	0	-0.00857	0	-0.0062	0	-0.00803	0	-0.00777	0	-0.00397	0	-0.00331	0
299	0.0168505	0.0101691	0.036672	0.0257425	0.192094	0.18563	0.970588	0.985605	0.504146	0.490226	0.017958	0.012295	0.0662125	0.0581329		299	0.49475	0.506965	0.0788471	0.0841418	0.00772548	0.00813615	0.00392502	0.00638396	0.0309477	0.035403	0.00378891	0.00700071	0.227972	0.239509		299	-0.00228	0	-0.00861	0	-0.00621	0	-0.00788	0	-0.00768	0	-0.00374	0	-0.00322	0
299.2	0.0173519	0.0102033	0.0369872	0.0258284	0.192957	0.186199	0.971603	0.986897	0.506359	0.491461	0.0182399	0.0123363	0.066908	0.0583228		299.2	0.49469	0.506968	0.0785773	0.0842051	0.00747604	0.00814565	0.00389186	0.00639176	0.0308225	0.0354402	0.00378094	0.00700917	0.228265	0.23957		299.2	-0.00265	0	-0.00886	0	-0.00628	0	-0.00739	0	-0.00753	0	-0.00359	0	-0.00325	0
299.4	0.0168374	0.0102376	0.036952	0.0259142	0.193154	0.186768	0.972751	0.988181	0.50741	0.492695	0.0182278	0.0123776	0.0667231	0.0585126		299.4	0.494855	0.506972	0.0785812	0.084268	0.00754364	0.00815508	0.00397302	0.00639953	0.030992	0.0354771	0.00394719	0.00701758	0.228756	0.239631		299.4	-0.00262	0	-0.00891	0	-0.00579	0	-0.00742	0	-0.00725	0	-0.0034	0	-0.00333	0
299.6	0.016581	0.0102718	0.0367429	0.0260001	0.193651	0.187337	0.973749	0.989458	0.508793	0.493926	0.0184643	0.0124189	0.0672035	0.0587024		299.6	0.494779	0.506975	0.0785157	0.0843303	0.00735115	0.00816446	0.00419345	0.00640724	0.0308403	0.0355137	0.0035168	0.00702594	0.228239	0.23969		299.6	-0.00287	0	-0.00924	0	-0.00571	0	-0.00703	0	-0.00695	0	-0.00314	0	-0.00328	0
299.8	0.0165855	0.010306	0.0368504	0.0260859	0.194399	0.187905	0.974573	0.990728	0.510048	0.495154	0.0184481	0.0124601	0.0674206	0.0588921		299.8	0.49512	0.506978	0.0784994	0.084392	0.00724789	0.00817378	0.00426073	0.00641491	0.0312962	0.0355501	0.00397478	0.00703425	0.228361	0.239749		299.8	-0.00301	0	-0.00944	0	-0.00565	0	-0.00724	0	-0.00723	0	-0.00321	0	-0.00337	0
300	0.0167449	0.0103402	0.0366571	0.0261717	0.194699	0.188473	0.976208	0.991991	0.511318	0.496381	0.0185132	0.0125014	0.0680485	0.0590818		300	0.495369	0.50698	0.0793585	0.0844533	0.00748917	0.00818304	0.0042196	0.00642253	0.0318243	0.0355862	0.00376991	0.00704251	0.22873	0.239807		300	-0.00304	0	-0.00967	0	-0.00558	0	-0.00748	0	-0.00706	0	-0.00328	0	-0.00332	0
300.2	0.0166437	0.0103744	0.0368674	0.0262575	0.195099	0.18904	0.977388	0.993247	0.512551	0.497604	0.0180074	0.0125427	0.0676005	0.0592715		300.2	0.49526	0.506983	0.0791075	0.084514	0.0072115	0.00819225	0.00394902	0.00643011	0.031386	0.0356221	0.003568	0.00705072	0.228137	0.239865		300.2	-0.003	0	-0.00962	0	-0.00491	0	-0.00723	0	-0.00675	0	-0.00296	0	-0.00283	0
300.4	0.0172011	0.0104086	0.0367983	0.0263432	0.195491	0.189607	0.978466	0.994496	0.513025	0.498826	0.0185632	0.0125839	0.0677002	0.0594611		300.4	0.494931	0.506986	0.0787473	0.0845742	0.00701513	0.00820139	0.0036062	0.00643764	0.0315532	0.0356577	0.00372466	0.00705888	0.227589	0.239921		300.4	-0.00289	0	-0.00967	0	-0.00408	0	-0.00725	0	-0.00679	0	-0.00268	0	-0.0025	0
300.6	0.0169724	0.0104429	0.0366453	0.026429	0.195821	0.190174	0.979424	0.995737	0.513604	0.500045	0.0186627	0.0126252	0.0677365	0.0596507		300.6	0.49499	0.506989	0.0788751	0.0846339	0.00737128	0.00821048	0.00381908	0.00644513	0.0313485	0.0356931	0.00389172	0.00706699	0.228158	0.239977		300.6	-0.00246	0	-0.00967	0	-0.00354	0	-0.00777	0	-0.00612	0	-0.00282	0	-0.00247	0
300.8	0.0173633	0.0104771	0.0371958	0.0265148	0.196517	0.19074	0.980218	0.996972	0.514893	0.501262	0.0187519	0.0126665	0.0679606	0.0598402		300.8	0.494775	0.506991	0.0788613	0.0846931	0.0074301	0.00821951	0.00353546	0.00645257	0.0314231	0.0357283	0.00357464	0.00707506	0.227999	0.240032		300.8	-0.00224	0	-0.00913	0	-0.00346	0	-0.00764	0	-0.006	0	-0.00255	0	-0.00203	0
301	0.0175332	0.0105113	0.0374032	0.0266006	0.196912	0.191306	0.981684	0.9982	0.515788	0.502477	0.0189404	0.0127077	0.0681739	0.0600296		301	0.495344	0.506994	0.0791444	0.0847518	0.00756535	0.00822849	0.00398016	0.00645997	0.0315338	0.0357632	0.00401399	0.00708307	0.228396	0.240086		301	-0.0013	0	-0.00851	0	-0.00292	0	-0.00732	0	-0.00585	0	-0.00156	0	-0.00141	0
301.2	0.0172081	0.0105455	0.0371631	0.0266863	0.197254	0.191872	0.982681	0.99942	0.516705	0.503689	0.0179986	0.012749	0.0679474	0.0602191		301.2	0.496002	0.506996	0.0798461	0.08481	0.00854994	0.00823741	0.00486033	0.00646732	0.0319391	0.0357979	0.00474479	0.00709103	0.229353	0.24014		301.2	-0.00078	0	-0.00848	0	-0.00268	0	-0.0076	0	-0.00628	0	-0.00184	0	-0.00101	0
301.4	0.017685	0.0105797	0.0374913	0.026772	0.198112	0.192437	0.98394	1.00063	0.517245	0.504899	0.0180801	0.0127902	0.0683276	0.0604084		301.4	0.496233	0.506998	0.0798922	0.0848677	0.00910239	0.00824627	0.00563317	0.00647463	0.0323202	0.0358323	0.00530429	0.00709895	0.229884	0.240193		301.4	-0.00053	0	-0.00798	0	-0.00287	0	-0.00823	0	-0.00677	0	-0.00172	0	-0.00131	0
301.6	0.0183503	0.0106139	0.0378639	0.0268578	0.199202	0.193002	0.985278	1.00184	0.518865	0.506107	0.0181948	0.0128315	0.0692383	0.0605977		301.6	0.496167	0.507001	0.0804694	0.0849249	0.00873944	0.00825508	0.0050674	0.00648189	0.0323263	0.0358665	0.00539887	0.00710682	0.229778	0.240245		301.6	-0.00044	0	-0.00787	0	-0.00348	0	-0.00851	0	-0.00699	0	-0.00185	0	-0.00151	0
301.8	0.0181504	0.0106481	0.0376042	0.0269435	0.199428	0.193567	0.986396	1.00304	0.519736	0.507312	0.0174791	0.0128728	0.0693987	0.060787		301.8	0.496145	0.507003	0.0811762	0.0849817	0.00908148	0.00826383	0.00595788	0.00648911	0.0327607	0.0359005	0.00598986	0.00711464	0.23021	0.240297		301.8	-0.00013	0	-0.00768	0	-0.00384	0	-0.00796	0	-0.0071	0	-0.00177	0	-0.00163	0
302	0.018407	0.0106823	0.0375256	0.0270292	0.200015	0.194131	0.987498	1.00423	0.520672	0.508515	0.017571	0.012914	0.0694016	0.0609763		302	0.496297	0.507005	0.0812537	0.085038	0.00883538	0.00827253	0.00605079	0.00649629	0.0324537	0.0359343	0.00635408	0.00712241	0.230291	0.240347		302	-0.00026	0	-0.00774	0	-0.00393	0	-0.00757	0	-0.00744	0	-0.00171	0	-0.00178	0
302.2	0.0187216	0.0107165	0.0380928	0.0271149	0.200689	0.194694	0.988918	1.00542	0.52172	0.509716	0.0174552	0.0129552	0.069519	0.0611654		302.2	0.496728	0.507007	0.081589	0.0850937	0.00873949	0.00828117	0.00642772	0.00650343	0.0325223	0.0359678	0.00624864	0.00713014	0.230509	0.240397		302.2	-0.00093	0	-0.00849	0	-0.00414	0	-0.00825	0	-0.00766	0	-0.00219	0	-0.002	0
302.4	0.0188311	0.0107507	0.0383628	0.0272006	0.201234	0.195258	0.99034	1.0066	0.523219	0.510915	0.0173408	0.0129965	0.069454	0.0613546		302.4	0.496987	0.507009	0.0819661	0.0851491	0.00888489	0.00828976	0.00609887	0.00651052	0.032771	0.0360011	0.00670341	0.00713781	0.230695	0.240447		302.4	-0.001	0	-0.00855	0	-0.00432	0	-0.00783	0	-0.00792	0	-0.00219	0	-0.00205	0
302.6	0.0182674	0.0107849	0.0379663	0.0272863	0.201026	0.195821	0.991115	1.00777	0.524122	0.512111	0.0167525	0.0130377	0.0692183	0.0615436		302.6	0.497266	0.507011	0.0820899	0.0852039	0.00911693	0.0082983	0.00639882	0.00651757	0.0330971	0.0360342	0.00650176	0.00714545	0.230856	0.240496		302.6	-0.00054	0	-0.00798	0	-0.00431	0	-0.00716	0	-0.00753	0	-0.00177	0	-0.00156	0
302.8	0.0181852	0.0108191	0.0382004	0.027372	0.201177	0.196383	0.991769	1.00894	0.525732	0.513305	0.0168227	0.013079	0.0692499	0.0617327		302.8	0.497691	0.507013	0.0826377	0.0852583	0.00933685	0.00830678	0.00705672	0.00652457	0.0333406	0.036067	0.0068719	0.00715303	0.231311	0.240544		302.8	-0.00061	0	-0.0081	0	-0.00449	0	-0.0068	0	-0.0072	0	-0.00151	0	-0.00168	0
303	0.0183297	0.0108533	0.0386955	0.0274576	0.20213	0.196946	0.99293	1.0101	0.52776	0.514496	0.0176451	0.0131202	0.0695021	0.0619217		303	0.497416	0.507015	0.0828634	0.0853122	0.0093698	0.00831521	0.00669585	0.00653154	0.0329113	0.0360996	0.00647869	0.00716057	0.231211	0.240591		303	-0.00112	0	-0.00839	0	-0.00464	0	-0.00695	0	-0.00732	0	-0.00177	0	-0.00178	0
303.2	0.0181004	0.0108874	0.0387086	0.0275433	0.202047	0.197508	0.993555	1.01126	0.528811	0.515686	0.0173961	0.0131614	0.0695351	0.0621106		303.2	0.497106	0.507017	0.0828915	0.0853657	0.00940008	0.00832359	0.00714683	0.00653846	0.0330848	0.036132	0.00626218	0.00716807	0.231394	0.240638		303.2	-0.00102	0	-0.00835	0	-0.00404	0	-0.00647	0	-0.00707	0	-0.00113	0	-0.00156	0
303.4	0.0176605	0.0109216	0.0385177	0.0276289	0.202502	0.198069	0.994697	1.0124	0.530207	0.516873	0.0172877	0.0132026	0.069109	0.0622995		303.4	0.496541	0.507019	0.0826155	0.0854187	0.0090087	0.00833192	0.0065669	0.00654534	0.0329903	0.0361642	0.00567433	0.00717552	0.230957	0.240684		303.4	-0.00055	0	-0.00779	0	-0.00386	0	-0.00607	0	-0.00662	0	-0.00056	0	-0.00123	0
303.6	0.0175948	0.0109558	0.0382753	0.0277146	0.202881	0.19863	0.995664	1.01354	0.531371	0.518057	0.0170088	0.0132439	0.0690419	0.0624884		303.6	0.49657	0.50702	0.0826172	0.0854713	0.00875504	0.00834019	0.00609488	0.00655218	0.0332047	0.0361961	0.00524168	0.00718292	0.230555	0.24073		303.6	-0.00105	0	-0.00855	0	-0.00432	0	-0.00569	0	-0.00679	0	-0.00092	0	-0.00136	0
303.8	0.0178396	0.01099	0.0383537	0.0278002	0.203708	0.199191	0.996872	1.01468	0.533142	0.51924	0.0171834	0.0132851	0.0696815	0.0626772		303.8	0.496872	0.507022	0.082754	0.0855234	0.00889086	0.00834841	0.00593337	0.00655898	0.0334723	0.0362279	0.00535894	0.00719028	0.230763	0.240775		303.8	-0.00072	0	-0.00901	0	-0.00406	0	-0.0053	0	-0.0068	0	-0.00097	0	-0.00158	0
304	0.0176907	0.0110242	0.0378651	0.0278858	0.203939	0.199751	0.997721	1.01581	0.534226	0.52042	0.017048	0.0133263	0.0696682	0.0628659		304	0.496757	0.507024	0.0829679	0.0855751	0.00925057	0.00835658	0.00542034	0.00656574	0.0334251	0.0362594	0.00461972	0.00719759	0.230778	0.240819		304	-0.00153	0	-0.00957	0	-0.00415	0	-0.0051	0	-0.00721	0	-0.00134	0	-0.00212	0
304.2	0.0175589	0.0110584	0.0382224	0.0279714	0.2048	0.200311	0.998592	1.01693	0.535462	0.521598	0.017148	0.0133675	0.0695625	0.0630546		304.2	0.496766	0.507025	0.0828823	0.0856263	0.00868624	0.0083647	0.00532549	0.00657246	0.0333234	0.0362907	0.0045609	0.00720486	0.230496	0.240863		304.2	-0.0015	0	-0.00924	0	-0.00357	0	-0.00498	0	-0.00689	0	-0.00122	0	-0.00184	0
304.4	0.0179946	0.0110925	0.0386007	0.028057	0.205585	0.200871	0.999427	1.01804	0.536417	0.522774	0.0177952	0.0134087	0.0699778	0.0632433		304.4	0.496395	0.507027	0.0828413	0.0856771	0.00846324	0.00837277	0.00511034	0.00657913	0.0330102	0.0363218	0.00425489	0.00721209	0.230957	0.240906		304.4	-0.00129	0	-0.00926	0	-0.003	0	-0.00472	0	-0.00639	0	-0.00103	0	-0.00163	0
304.6	0.0175862	0.0111267	0.0383875	0.0281426	0.206272	0.20143	1.00024	1.01915	0.537363	0.523948	0.0177355	0.01345	0.070262	0.0634319		304.6	0.496066	0.507028	0.0828047	0.0857275	0.00863684	0.00838079	0.00501826	0.00658577	0.0332371	0.0363527	0.00435458	0.00721927	0.231336	0.240949		304.6	-0.00117	0	-0.00908	0	-0.00301	0	-0.00553	0	-0.0063	0	-0.00157	0	-0.00227	0
304.8	0.018084	0.0111609	0.0385017	0.0282282	0.207219	0.201989	1.00098	1.02025	0.539001	0.525119	0.0181099	0.0134912	0.0708487	0.0636205		304.8	0.49599	0.50703	0.0825908	0.0857775	0.00886419	0.00838875	0.00482263	0.00659237	0.0334405	0.0363834	0.00436752	0.00722641	0.231504	0.240991		304.8	-0.00104	0	-0.00879	0	-0.00362	0	-0.00607	0	-0.00694	0	-0.00177	0	-0.00247	0
305	0.0175016	0.0111951	0.0381369	0.0283138	0.206947	0.202548	1.00166	1.02135	0.539823	0.526288	0.0180348	0.0135324	0.0710176	0.063809		305	0.496288	0.507031	0.0826287	0.085827	0.00888182	0.00839667	0.00510437	0.00659893	0.0332221	0.0364138	0.0044575	0.0072335	0.231833	0.241032		305	-0.00015	0	-0.00866	0	-0.00328	0	-0.00624	0	-0.00724	0	-0.00162	0	-0.00246	0
305.2	0.017433	0.0112293	0.037944	0.0283993	0.207402	0.203106	1.00221	1.02244	0.540382	0.527455	0.0175164	0.0135736	0.0709588	0.0639975		305.2	0.496062	0.507033	0.0827809	0.0858761	0.00916221	0.00840454	0.00504553	0.00660544	0.0331021	0.0364441	0.00422198	0.00724055	0.231874	0.241073		305.2	-0.00035	0	-0.00849	0	-0.00393	0	-0.00632	0	-0.00717	0	-0.00233	0	-0.00263	0
305.4	0.0177793	0.0112634	0.038397	0.0284849	0.208189	0.203663	1.00362	1.02352	0.541744	0.528619	0.018247	0.0136148	0.0718293	0.0641859		305.4	0.495357	0.507034	0.0821109	0.0859248	0.00860842	0.00841236	0.00375532	0.00661192	0.0321778	0.0364742	0.00337482	0.00724756	0.231188	0.241114		305.4	-0.00084	0	-0.00861	0	-0.00458	0	-0.00733	0	-0.0077	0	-0.00287	0	-0.00327	0
305.6	0.0181776	0.0112976	0.0387448	0.0285704	0.209567	0.204221	1.00471	1.0246	0.543587	0.529782	0.0187137	0.013656	0.0725981	0.0643743		305.6	0.495257	0.507035	0.0824254	0.0859731	0.00856274	0.00842013	0.00345909	0.00661836	0.0323221	0.036504	0.00339314	0.00725453	0.231527	0.241153		305.6	-0.00118	0	-0.00904	0	-0.00495	0	-0.00781	0	-0.00834	0	-0.00347	0	-0.00379	0
305.8	0.0184241	0.0113318	0.0386997	0.028656	0.209756	0.204778	1.0059	1.02567	0.544821	0.530942	0.018639	0.0136972	0.0728654	0.0645626		305.8	0.495374	0.507036	0.0822706	0.086021	0.00806783	0.00842785	0.00389939	0.00662476	0.0318978	0.0365337	0.00346839	0.00726145	0.231218	0.241193		305.8	-0.00139	0	-0.00963	0	-0.00539	0	-0.00823	0	-0.0088	0	-0.0044	0	-0.00432	0
306	0.0184435	0.0113659	0.0389163	0.0287415	0.210129	0.205335	1.00704	1.02674	0.545785	0.5321	0.0188282	0.0137384	0.0729906	0.0647509		306	0.495774	0.507038	0.082142	0.0860685	0.0078305	0.00843553	0.00319876	0.00663113	0.0315707	0.0365631	0.00312014	0.00726834	0.230892	0.241231		306	-0.00193	0	-0.00962	0	-0.00586	0	-0.00896	0	-0.00922	0	-0.00457	0	-0.00425	0
306.2	0.018798	0.0114001	0.0393695	0.028827	0.210669	0.205891	1.00851	1.0278	0.547033	0.533255	0.0189779	0.0137795	0.0731556	0.0649392		306.2	0.496253	0.507039	0.0822567	0.0861156	0.00797471	0.00844315	0.00349912	0.00663745	0.0319077	0.0365923	0.00323976	0.00727518	0.230961	0.24127		306.2	-0.00247	0	-0.00994	0	-0.00588	0	-0.00963	0	-0.00935	0	-0.00428	0	-0.00406	0
306.4	0.0187424	0.0114343	0.0391547	0.0289125	0.211058	0.206447	1.0098	1.02885	0.547888	0.534409	0.0193305	0.0138207	0.0734736	0.0651274		306.4	0.496463	0.50704	0.0828438	0.0861623	0.00835667	0.00845073	0.00385861	0.00664374	0.0322	0.0366214	0.00360839	0.00728198	0.231517	0.241308		306.4	-0.00231	0	-0.00935	0	-0.0058	0	-0.00941	0	-0.00903	0	-0.00368	0	-0.00367	0
306.6	0.0183344	0.0114684	0.0389733	0.028998	0.211125	0.207002	1.01063	1.0299	0.548424	0.53556	0.0194699	0.0138619	0.0731817	0.0653155		306.6	0.496797	0.507041	0.082873	0.0862085	0.00838264	0.00845826	0.00422713	0.00664999	0.0325495	0.0366502	0.00324308	0.00728873	0.232079	0.241345		306.6	-0.00277	0	-0.00969	0	-0.006	0	-0.00974	0	-0.0089	0	-0.00377	0	-0.00353	0
306.8	0.0191443	0.0115026	0.0400176	0.0290835	0.212122	0.207558	1.01186	1.03094	0.549906	0.536709	0.0203354	0.0139031	0.0739852	0.0655036		306.8	0.497247	0.507042	0.0832694	0.0862544	0.00823576	0.00846574	0.0043222	0.0066562	0.0328539	0.0366789	0.00315691	0.00729545	0.232252	0.241381		306.8	-0.00264	0	-0.00973	0	-0.00613	0	-0.00932	0	-0.00886	0	-0.00339	0	-0.00326	0
307	0.0189699	0.0115367	0.0403618	0.029169	0.21219	0.208112	1.01228	1.03198	0.550353	0.537856	0.0197113	0.0139443	0.07344	0.0656917		307	0.497604	0.507043	0.083547	0.0863	0.00810298	0.00847318	0.00429755	0.00666238	0.0328556	0.0367073	0.00315411	0.00730213	0.232343	0.241418		307	-0.00272	0	-0.00986	0	-0.0061	0	-0.00951	0	-0.00869	0	-0.00358	0	-0.00315	0
307.2	0.0188469	0.0115709	0.0400665	0.0292544	0.212041	0.208667	1.01329	1.03301	0.550746	0.539001	0.0193491	0.0139855	0.0730508	0.0658796		307.2	0.497943	0.507044	0.0837574	0.0863451	0.00841609	0.00848057	0.00521197	0.00666851	0.0333598	0.0367356	0.00391871	0.00730876	0.233039	0.241454		307.2	-0.00231	0	-0.00989	0	-0.00575	0	-0.00898	0	-0.00844	0	-0.0028	0	-0.00273	0
307.4	0.0190283	0.0116051	0.0400803	0.0293399	0.213046	0.209221	1.01465	1.03403	0.552232	0.540143	0.0192614	0.0140266	0.0732865	0.0660676		307.4	0.498155	0.507045	0.0835263	0.0863898	0.00835587	0.00848792	0.00486602	0.00667461	0.0333454	0.0367637	0.00388305	0.00731536	0.233226	0.241489		307.4	-0.00193	0	-0.00942	0	-0.00573	0	-0.0086	0	-0.00791	0	-0.00234	0	-0.00232	0
307.6	0.0194573	0.0116392	0.040078	0.0294253	0.21363	0.209775	1.01599	1.03505	0.552984	0.541284	0.0193216	0.0140678	0.074074	0.0662555		307.6	0.499113	0.507046	0.0841082	0.0864342	0.00909645	0.00849521	0.00516134	0.00668068	0.0336222	0.0367916	0.00462092	0.00732191	0.233877	0.241524		307.6	-0.00191	0	-0.00974	0	-0.00548	0	-0.00825	0	-0.0078	0	-0.00245	0	-0.00221	0
307.8	0.0196496	0.0116734	0.0403152	0.0295108	0.214537	0.210328	1.01745	1.03607	0.554672	0.542422	0.0194597	0.014109	0.0748306	0.0664434		307.8	0.499626	0.507047	0.0847681	0.0864782	0.00962525	0.00850247	0.0058488	0.0066867	0.0336301	0.0368193	0.00505951	0.00732843	0.234363	0.241558		307.8	-0.00198	0	-0.00925	0	-0.00484	0	-0.0076	0	-0.00749	0	-0.00206	0	-0.00158	0
308	0.0194244	0.0117075	0.0403491	0.0295962	0.214439	0.210881	1.01827	1.03707	0.555412	0.543558	0.0192209	0.0141502	0.0745556	0.0666312		308	0.499651	0.507048	0.0847516	0.0865218	0.00969257	0.00850967	0.00576324	0.0066927	0.0336802	0.0368468	0.00517243	0.00733491	0.234329	0.241592		308	-0.00147	0	-0.00865	0	-0.00363	0	-0.00672	0	-0.00633	0	-0.00121	0	-0.00074	0
308.2	0.0195787	0.0117416	0.0407896	0.0296816	0.215528	0.211434	1.01933	1.03807	0.556284	0.544692	0.0195902	0.0141913	0.0749743	0.066819		308.2	0.499697	0.507049	0.0845893	0.086565	0.00969258	0.00851684	0.00598926	0.00669865	0.0334195	0.0368741	0.00564204	0.00734134	0.234765	0.241625		308.2	-0.00054	0	-0.00829	0	-0.00303	0	-0.0069	0	-0.00576	0	-0.00083	0	-0.00031	0
308.4	0.01992	0.0117758	0.0409432	0.029767	0.216461	0.211986	1.02032	1.03907	0.557533	0.545823	0.0197131	0.0142325	0.075455	0.0670067		308.4	0.499165	0.50705	0.0840298	0.0866079	0.00954754	0.00852395	0.00543137	0.00670457	0.0331076	0.0369012	0.00601143	0.00734774	0.234831	0.241658		308.4	-0.00016	0	-0.00816	0	-0.0025	0	-0.0067	0	-0.00521	0	-0.00055	0	-1e-05	0
308.6	0.0193156	0.0118099	0.0405099	0.0298524	0.216607	0.212538	1.02079	1.04006	0.557877	0.546953	0.0194576	0.0142736	0.0754197	0.0671944		308.6	0.498306	0.507051	0.0834388	0.0866504	0.00932765	0.00853103	0.00528118	0.00671045	0.0329766	0.0369281	0.00616012	0.0073541	0.234405	0.241691		308.6	0.000267	0	-0.00817	0	-0.00252	0	-0.0072	0	-0.00541	0	-0.001	0	0.000124	0
308.8	0.0194734	0.0118441	0.0407928	0.0299378	0.217208	0.213089	1.0214	1.04105	0.559603	0.54808	0.0192226	0.0143148	0.0761261	0.067382		308.8	0.49769	0.507052	0.0831121	0.0866926	0.00899545	0.00853806	0.00480588	0.0067163	0.0329404	0.0369549	0.00593664	0.00736042	0.234134	0.241723		308.8	0.000813	0	-0.00771	0	-0.00182	0	-0.00658	0	-0.00516	0	-0.00078	0	0.000615	0
309	0.0188817	0.0118782	0.0410805	0.0300232	0.217329	0.21364	1.02203	1.04202	0.560267	0.549205	0.0189951	0.0143559	0.0761405	0.0675696		309	0.497197	0.507052	0.0828	0.0867344	0.00865458	0.00854504	0.00417549	0.00672212	0.0323988	0.0369815	0.00535296	0.0073667	0.233274	0.241755		309	0.000823	0	-0.00779	0	-0.00177	0	-0.00592	0	-0.00537	0	-0.00098	0	0.000638	0
309.2	0.0189468	0.0119124	0.0414969	0.0301086	0.217781	0.214191	1.02258	1.043	0.561333	0.550328	0.0188015	0.0143971	0.0761475	0.0677571		309.2	0.496655	0.507053	0.0828934	0.0867759	0.00889931	0.00855198	0.00355636	0.0067279	0.0321215	0.0370079	0.0052457	0.00737295	0.233299	0.241786		309.2	-0.00019	0	-0.00813	0	-0.00222	0	-0.00623	0	-0.00581	0	-0.00158	0	0.00035	0
309.4	0.0188196	0.0119465	0.0413795	0.0301939	0.218639	0.214741	1.02336	1.04397	0.562735	0.551449	0.0190747	0.0144382	0.0762013	0.0679446		309.4	0.49616	0.507054	0.0821143	0.086817	0.00821587	0.00855888	0.00262617	0.00673364	0.030874	0.0370341	0.00421664	0.00737915	0.232327	0.241817		309.4	-0.00018	0	-0.00796	0	-0.00169	0	-0.00621	0	-0.00662	0	-0.00146	0	0.000291	0
309.6	0.0187872	0.0119806	0.0414315	0.0302793	0.219537	0.215291	1.02381	1.04493	0.563546	0.552568	0.018717	0.0144794	0.0759693	0.0681321		309.6	0.496073	0.507055	0.082183	0.0868577	0.00824573	0.00856574	0.0028878	0.00673935	0.0310954	0.0370602	0.00452482	0.00738532	0.232048	0.241847		309.6	-0.0005	0	-0.00847	0	-0.00142	0	-0.00632	0	-0.00724	0	-0.00156	0	2.21e-05	0
309.8	0.0190653	0.0120148	0.0413475	0.0303646	0.219892	0.215841	1.02473	1.04589	0.564623	0.553684	0.0184028	0.0145205	0.0759872	0.0683195		309.8	0.495675	0.507055	0.0817229	0.0868981	0.00755826	0.00857255	0.00266542	0.00674502	0.0307096	0.037086	0.0041943	0.00739145	0.231539	0.241877		309.8	-0.00062	0	-0.00822	0	-0.00084	0	-0.00608	0	-0.00659	0	-0.00135	0	0.000339	0
310	0.0190778	0.0120489	0.041407	0.03045	0.220495	0.21639	1.02537	1.04684	0.565449	0.554799	0.0179031	0.0145617	0.0759014	0.0685068		310	0.495978	0.507056	0.0820643	0.0869382	0.00787686	0.00857932	0.00285101	0.00675067	0.0313141	0.0371117	0.00442836	0.00739755	0.232032	0.241907		310	-0.00058	0	-0.00786	0	-0.00076	0	-0.0058	0	-0.0068	0	-0.00059	0	0.000294	0
310.2	0.0189483	0.012083	0.0414554	0.0305353	0.22058	0.216939	1.02622	1.04778	0.566319	0.555911	0.0178177	0.0146028	0.0755841	0.0686941		310.2	0.495393	0.507057	0.0817448	0.0869779	0.007556	0.00858605	0.00302714	0.00675627	0.031663	0.0371372	0.00407605	0.0074036	0.231969	0.241936		310.2	-0.00115	0	-0.00801	0	-0.00098	0	-0.0059	0	-0.00722	0	-0.00052	0	5.45e-05	0
310.4	0.0184665	0.0121172	0.0411367	0.0306206	0.220707	0.217488	1.02631	1.04873	0.566726	0.557021	0.0176744	0.0146439	0.0752451	0.0688814		310.4	0.495106	0.507057	0.0822212	0.0870173	0.00750876	0.00859273	0.00338833	0.00676185	0.03217	0.0371626	0.00422818	0.00740962	0.2326	0.241965		310.4	-0.00154	0	-0.0081	0	-0.00124	0	-0.00623	0	-0.00765	0	-0.00075	0	-0.00033	0
310.6	0.0184807	0.0121513	0.0414076	0.0307059	0.221321	0.218036	1.02699	1.04966	0.567862	0.55813	0.0175566	0.0146851	0.0754526	0.0690686		310.6	0.495336	0.507058	0.0822925	0.0870564	0.00742498	0.00859937	0.00330276	0.00676739	0.0327335	0.0371877	0.00394462	0.00741561	0.232506	0.241993		310.6	-0.00175	0	-0.00856	0	-0.00174	0	-0.00624	0	-0.00784	0	-0.00143	0	-0.00054	0
310.8	0.0192574	0.0121854	0.0417188	0.0307912	0.221905	0.218584	1.02752	1.05059	0.569099	0.559236	0.0180877	0.0147262	0.0758749	0.0692558		310.8	0.495551	0.507059	0.0828201	0.0870951	0.00751094	0.00860598	0.00376638	0.00677289	0.0331163	0.0372127	0.00400391	0.00742155	0.232425	0.242021		310.8	-0.00232	0	-0.00884	0	-0.0023	0	-0.00677	0	-0.00826	0	-0.00187	0	-0.00094	0
311	0.0192129	0.0122195	0.0419069	0.0308765	0.221847	0.219132	1.02847	1.05152	0.570159	0.560339	0.0181634	0.0147673	0.0753539	0.0694429		311	0.496109	0.507059	0.0830913	0.0871335	0.00774468	0.00861254	0.00423785	0.00677837	0.0334547	0.0372376	0.00454375	0.00742747	0.232405	0.242049		311	-0.00215	0	-0.00885	0	-0.00196	0	-0.00699	0	-0.00786	0	-0.00196	0	-0.00146	0
311.2	0.0196524	0.0122537	0.0416764	0.0309618	0.222071	0.219679	1.02954	1.05244	0.571374	0.561441	0.0186733	0.0148085	0.0754211	0.06963		311.2	0.496765	0.50706	0.0831894	0.0871716	0.00798476	0.00861906	0.00477034	0.00678381	0.0336741	0.0372622	0.0049602	0.00743334	0.232631	0.242076		311.2	-0.00167	0	-0.00903	0	-0.00218	0	-0.00714	0	-0.00833	0	-0.00138	0	-0.00151	0
311.4	0.0199398	0.0122878	0.0421947	0.031047	0.222884	0.220225	1.03065	1.05335	0.57329	0.562541	0.0191575	0.0148496	0.0762466	0.069817		311.4	0.496526	0.50706	0.0828249	0.0872094	0.00745768	0.00862554	0.00448796	0.00678922	0.0333503	0.0372867	0.00440528	0.00743918	0.231983	0.242103		311.4	-0.00136	0	-0.00883	0	-0.00235	0	-0.0073	0	-0.00814	0	-0.00158	0	-0.00195	0
311.6	0.0203554	0.0123219	0.0423353	0.0311323	0.223178	0.220772	1.03187	1.05426	0.574645	0.563638	0.0194437	0.0148907	0.0765614	0.070004		311.6	0.497175	0.507061	0.0831149	0.0872468	0.00794442	0.00863197	0.00491123	0.00679459	0.0333443	0.037311	0.00475758	0.00744499	0.231929	0.24213		311.6	-0.00112	0	-0.00853	0	-0.00246	0	-0.00755	0	-0.00762	0	-0.00141	0	-0.00214	0
311.8	0.0201963	0.012356	0.0423312	0.0312176	0.223295	0.221318	1.03294	1.05517	0.576119	0.564734	0.0197351	0.0149318	0.0763776	0.0701909		311.8	0.497431	0.507061	0.0829356	0.0872839	0.00806219	0.00863837	0.00468105	0.00679994	0.033354	0.0373352	0.00472469	0.00745076	0.231719	0.242156		311.8	-0.00094	0	-0.00876	0	-0.00267	0	-0.00769	0	-0.00733	0	-0.0016	0	-0.0022	0
312	0.02062	0.0123902	0.0427557	0.0313028	0.224276	0.221864	1.03408	1.05607	0.577785	0.565827	0.0199522	0.0149729	0.0767215	0.0703778		312	0.497741	0.507062	0.0822262	0.0873207	0.00811679	0.00864473	0.00485004	0.00680525	0.0335141	0.0373592	0.00515955	0.00745649	0.231638	0.242182		312	-0.00063	0	-0.00887	0	-0.00276	0	-0.00786	0	-0.00672	0	-0.00166	0	-0.00295	0
312.2	0.0205362	0.0124243	0.0426609	0.031388	0.224821	0.222409	1.03491	1.05696	0.578977	0.566918	0.019619	0.015014	0.07694	0.0705646		312.2	0.497672	0.507062	0.0821112	0.0873572	0.00802031	0.00865105	0.00489648	0.00681053	0.0334629	0.037383	0.00558442	0.00746219	0.231887	0.242208		312.2	-0.00094	0	-0.00904	0	-0.00325	0	-0.00838	0	-0.00704	0	-0.00195	0	-0.0032	0
312.4	0.0204934	0.0124584	0.0425144	0.0314733	0.225076	0.222954	1.03569	1.05785	0.57993	0.568008	0.0193761	0.0150551	0.0772697	0.0707514		312.4	0.497566	0.507063	0.0819424	0.0873934	0.00780195	0.00865733	0.00484111	0.00681578	0.0339247	0.0374067	0.00626176	0.00746785	0.231975	0.242233		312.4	-0.00099	0	-0.00877	0	-0.00339	0	-0.00833	0	-0.00637	0	-0.00212	0	-0.00279	0
312.6	0.0200839	0.0124925	0.0426955	0.0315585	0.22514	0.223498	1.03602	1.05873	0.580724	0.569095	0.0191182	0.0150963	0.0772931	0.0709382		312.6	0.496984	0.507063	0.0815656	0.0874293	0.00731534	0.00866357	0.00451158	0.00682099	0.0335417	0.0374302	0.00566279	0.00747349	0.231052	0.242258		312.6	-0.00054	0	-0.0084	0	-0.00357	0	-0.00801	0	-0.00658	0	-0.00222	0	-0.00272	0
312.8	0.0201109	0.0125266	0.0434804	0.0316437	0.225933	0.224043	1.03734	1.05961	0.582201	0.57018	0.0191251	0.0151374	0.078133	0.0711249		312.8	0.497371	0.507064	0.0818477	0.0874649	0.00780607	0.00866977	0.00497508	0.00682618	0.0341568	0.0374536	0.00583274	0.00747908	0.231333	0.242282		312.8	-0.00038	0	-0.00799	0	-0.00365	0	-0.00739	0	-0.00626	0	-0.00234	0	-0.00261	0
313	0.019444	0.0125607	0.0434916	0.0317289	0.226357	0.224586	1.03793	1.06049	0.582997	0.571263	0.0189006	0.0151785	0.0780984	0.0713115		313	0.497592	0.507064	0.0819808	0.0875001	0.00833867	0.00867593	0.00493824	0.00683133	0.0339164	0.0374768	0.0051757	0.00748464	0.230968	0.242306		313	-0.00046	0	-0.0076	0	-0.00426	0	-0.0069	0	-0.00624	0	-0.0024	0	-0.00242	0
313.2	0.0194869	0.0125948	0.0433183	0.0318141	0.226693	0.22513	1.03876	1.06136	0.584183	0.572344	0.0188592	0.0152196	0.0779016	0.0714981		313.2	0.49709	0.507065	0.0817439	0.0875351	0.00778474	0.00868205	0.004705	0.00683645	0.03282	0.0374998	0.00477424	0.00749017	0.23063	0.24233		313.2	-0.00056	0	-0.0072	0	-0.00357	0	-0.00619	0	-0.00632	0	-0.00203	0	-0.00208	0
313.4	0.0191779	0.0126289	0.0425862	0.0318992	0.227247	0.225673	1.03908	1.06222	0.584695	0.573422	0.0190163	0.0152607	0.0777923	0.0716847		313.4	0.497132	0.507065	0.0814611	0.0875698	0.00727707	0.00868814	0.00443874	0.00684155	0.0320407	0.0375227	0.00415852	0.00749567	0.230208	0.242354		313.4	-0.00051	0	-0.00731	0	-0.00314	0	-0.0059	0	-0.00657	0	-0.00185	0	-0.00213	0
313.6	0.0194831	0.012663	0.0429605	0.0319844	0.228071	0.226216	1.04017	1.06308	0.58544	0.574499	0.019029	0.0153017	0.0778624	0.0718712		313.6	0.49685	0.507066	0.0814599	0.0876042	0.00677413	0.00869419	0.00453658	0.00684661	0.03192	0.0375454	0.00391454	0.00750113	0.230448	0.242377		313.6	-0.00142	0	-0.00785	0	-0.00322	0	-0.00608	0	-0.00681	0	-0.00225	0	-0.00205	0
313.8	0.0199518	0.0126971	0.0431849	0.0320695	0.229432	0.226758	1.0416	1.06394	0.586624	0.575574	0.0198583	0.0153428	0.078378	0.0720577		313.8	0.497083	0.507066	0.0816485	0.0876383	0.00673349	0.0087002	0.0046449	0.00685164	0.0322807	0.037568	0.00392642	0.00750656	0.230908	0.2424		313.8	-0.00114	0	-0.0075	0	-0.00283	0	-0.00555	0	-0.00664	0	-0.00242	0	-0.00186	0
314	0.0192973	0.0127312	0.0428926	0.0321547	0.229801	0.2273	1.04195	1.06479	0.58711	0.576646	0.0197948	0.0153839	0.0779908	0.0722441		314	0.497431	0.507066	0.0824157	0.0876721	0.00676017	0.00870617	0.00465588	0.00685664	0.0327621	0.0375904	0.00416737	0.00751196	0.231315	0.242423		314	-0.00117	0	-0.00765	0	-0.00332	0	-0.00551	0	-0.00745	0	-0.00257	0	-0.00192	0
314.2	0.0188984	0.0127653	0.0424015	0.0322398	0.230055	0.227842	1.04266	1.06563	0.587536	0.577717	0.0197554	0.015425	0.0777998	0.0724305		314.2	0.497142	0.507067	0.0824366	0.0877057	0.00653307	0.0087121	0.00462111	0.00686161	0.033401	0.0376126	0.00437827	0.00751732	0.231575	0.242445		314.2	-0.0014	0	-0.00797	0	-0.00376	0	-0.00581	0	-0.0082	0	-0.00326	0	-0.0015	0
314.4	0.018347	0.0127994	0.0419365	0.0323249	0.230684	0.228383	1.04284	1.06647	0.588172	0.578786	0.0197674	0.0154661	0.0778602	0.0726168		314.4	0.497146	0.507067	0.0827505	0.0877389	0.00636067	0.008718	0.00481487	0.00686655	0.0332271	0.0376347	0.00426461	0.00752265	0.231943	0.242467		314.4	-0.00148	0	-0.00829	0	-0.00359	0	-0.00579	0	-0.00833	0	-0.00342	0	-0.00126	0
314.6	0.0186282	0.0128335	0.0421947	0.0324101	0.231547	0.228924	1.04379	1.06731	0.589651	0.579852	0.0201951	0.0155072	0.0781076	0.0728031		314.6	0.497625	0.507068	0.08369	0.0877719	0.0069385	0.00872386	0.00494399	0.00687147	0.0335956	0.0376567	0.00432784	0.00752795	0.232307	0.242489		314.6	-0.00186	0	-0.00845	0	-0.00392	0	-0.00601	0	-0.00837	0	-0.00359	0	-0.00123	0
314.8	0.0186533	0.0128676	0.0422181	0.0324952	0.231957	0.229465	1.04457	1.06814	0.590462	0.580917	0.0207392	0.0155482	0.0782646	0.0729893		314.8	0.497956	0.507068	0.084353	0.0878046	0.0069369	0.00872969	0.00484904	0.00687635	0.0334765	0.0376785	0.00460937	0.00753321	0.232611	0.24251		314.8	-0.00235	0	-0.00898	0	-0.00428	0	-0.0064	0	-0.00878	0	-0.00383	0	-0.00167	0
315	0.0187789	0.0129017	0.0424132	0.0325803	0.231993	0.230005	1.0454	1.06897	0.591107	0.581979	0.0210777	0.0155893	0.0782774	0.0731755		315	0.49836	0.507068	0.0848754	0.087837	0.00707212	0.00873547	0.00494677	0.0068812	0.0337784	0.0377002	0.00497875	0.00753845	0.232848	0.242531		315	-0.00184	0	-0.00907	0	-0.00406	0	-0.00615	0	-0.00867	0	-0.00341	0	-0.00113	0
315.2	0.0193092	0.0129358	0.0424268	0.0326654	0.232763	0.230545	1.04604	1.06979	0.592214	0.583039	0.0215123	0.0156304	0.0786771	0.0733617		315.2	0.499016	0.507069	0.0853512	0.0878691	0.00752333	0.00874123	0.00533102	0.00688602	0.0342801	0.0377217	0.00541184	0.00754365	0.233527	0.242552		315.2	-0.00129	0	-0.00947	0	-0.00395	0	-0.00623	0	-0.00888	0	-0.00255	0	-0.00059	0
315.4	0.0195869	0.0129699	0.0427922	0.0327505	0.23369	0.231085	1.04677	1.0706	0.593684	0.584098	0.0217553	0.0156715	0.0792706	0.0735477		315.4	0.499396	0.507069	0.0856182	0.087901	0.0079272	0.00874694	0.00514369	0.00689082	0.0345026	0.037743	0.00530418	0.00754882	0.233647	0.242573		315.4	-0.00171	0	-0.00953	0	-0.00405	0	-0.0068	0	-0.00866	0	-0.00322	0	-0.00095	0
315.6	0.0197154	0.013004	0.0427831	0.0328355	0.233885	0.231624	1.04756	1.07142	0.595121	0.585154	0.0218472	0.0157125	0.0794812	0.0737338		315.6	0.500079	0.507069	0.0861162	0.0879326	0.0085586	0.00875262	0.0055191	0.00689559	0.0347466	0.0377643	0.00600941	0.00755396	0.234059	0.242593		315.6	-0.00193	0	-0.00972	0	-0.00411	0	-0.00723	0	-0.00856	0	-0.003	0	-0.00109	0
315.8	0.0196943	0.0130381	0.0428397	0.0329206	0.234243	0.232163	1.04804	1.07222	0.596024	0.586209	0.0218898	0.0157536	0.0799425	0.0739198		315.8	0.500297	0.50707	0.0858491	0.0879639	0.00875285	0.00875827	0.00479225	0.00690032	0.0347729	0.0377853	0.00634352	0.00755907	0.234282	0.242613		315.8	-0.00205	0	-0.00974	0	-0.00428	0	-0.00694	0	-0.00851	0	-0.00324	0	-0.00148	0
316	0.0199893	0.0130721	0.0431279	0.0330056	0.234938	0.232701	1.04878	1.07303	0.597068	0.587261	0.0215624	0.0157947	0.080236	0.0741057		316	0.500552	0.50707	0.0858192	0.087995	0.0089152	0.00876387	0.00527278	0.00690503	0.0353294	0.0378063	0.00683322	0.00756415	0.234618	0.242633		316	-0.00213	0	-0.00896	0	-0.00401	0	-0.00685	0	-0.00801	0	-0.00292	0	-0.00155	0
316.2	0.0190877	0.0131062	0.0428288	0.0330907	0.234375	0.233239	1.04876	1.07383	0.597216	0.588311	0.0206175	0.0158357	0.079949	0.0742917		316.2	0.500021	0.50707	0.085498	0.0880258	0.00883429	0.00876945	0.00537121	0.00690971	0.0354115	0.0378271	0.00666393	0.00756919	0.234623	0.242652		316.2	-0.00174	0	-0.00842	0	-0.00359	0	-0.00664	0	-0.00763	0	-0.00216	0	-0.00075	0
316.4	0.0185016	0.0131403	0.042403	0.0331757	0.234799	0.233777	1.04911	1.07462	0.5977	0.58936	0.0203179	0.0158768	0.0803908	0.0744775		316.4	0.500067	0.50707	0.0853917	0.0880563	0.00895365	0.00877499	0.00569018	0.00691436	0.0360578	0.0378477	0.0069571	0.00757421	0.234701	0.242671		316.4	-0.00138	0	-0.00786	0	-0.00332	0	-0.00631	0	-0.00707	0	-0.00196	0	-0.00063	0
316.6	0.0183491	0.0131744	0.042803	0.0332607	0.235165	0.234314	1.0496	1.07541	0.598836	0.590406	0.0199816	0.0159178	0.0804558	0.0746634		316.6	0.49968	0.507071	0.0854471	0.0880866	0.00908852	0.00878049	0.00557285	0.00691899	0.0359809	0.0378682	0.00632935	0.0075792	0.234307	0.24269		316.6	-0.00047	0	-0.00739	0	-0.00263	0	-0.00563	0	-0.0065	0	-0.00146	0	-3.3e-05	0
316.8	0.0182552	0.0132085	0.0428151	0.0333458	0.235259	0.234851	1.05035	1.0762	0.599374	0.59145	0.0194223	0.0159589	0.0804873	0.0748491		316.8	0.49948	0.507071	0.0855647	0.0881166	0.00957019	0.00878596	0.00612552	0.00692359	0.0360633	0.0378886	0.00628391	0.00758415	0.234578	0.242709		316.8	-0.00056	0	-0.00758	0	-0.00249	0	-0.00536	0	-0.0057	0	-0.0016	0	0.000123	0
317	0.018275	0.0132425	0.0427863	0.0334308	0.235598	0.235388	1.05101	1.07698	0.600259	0.592492	0.0191069	0.0159999	0.0801228	0.0750349		317	0.499085	0.507071	0.0856964	0.0881464	0.00930059	0.0087914	0.0055186	0.00692816	0.0356833	0.0379088	0.00560825	0.00758908	0.234362	0.242728		317	-0.00084	0	-0.00777	0	-0.00247	0	-0.00531	0	-0.00596	0	-0.00157	0	-0.00034	0
317.2	0.0181086	0.0132766	0.0424439	0.0335158	0.236065	0.235924	1.05175	1.07775	0.60107	0.593533	0.0190277	0.016041	0.0798248	0.0752205		317.2	0.4985	0.507071	0.0853502	0.0881759	0.00867062	0.0087968	0.00520689	0.0069327	0.0351439	0.0379289	0.00604401	0.00759397	0.233752	0.242746		317.2	-0.00119	0	-0.00789	0	-0.00174	0	-0.00499	0	-0.00587	0	-0.00111	0	-0.00045	0
317.4	0.0183956	0.0133107	0.0424669	0.0336007	0.236553	0.23646	1.05191	1.07853	0.601962	0.594571	0.0188887	0.016082	0.0798787	0.0754062		317.4	0.498351	0.507072	0.0854881	0.0882052	0.00853743	0.00880217	0.00491989	0.00693721	0.035181	0.0379489	0.00581635	0.00759884	0.2333	0.242764		317.4	-0.00105	0	-0.00798	0	-0.0016	0	-0.00494	0	-0.00579	0	-0.00063	0	-0.00018	0
317.6	0.0184626	0.0133447	0.0427121	0.0336857	0.237412	0.236996	1.05285	1.07929	0.602991	0.595607	0.0184912	0.016123	0.0800003	0.0755917		317.6	0.498542	0.507072	0.0854403	0.0882342	0.00865179	0.00880751	0.00492266	0.0069417	0.0349972	0.0379687	0.00604288	0.00760367	0.233603	0.242782		317.6	-0.00098	0	-0.00836	0	-0.00175	0	-0.00504	0	-0.0062	0	-0.00053	0	-0.00073	0
317.8	0.017827	0.0133788	0.0423004	0.0337707	0.237879	0.237531	1.05322	1.08006	0.604303	0.596642	0.0181176	0.0161641	0.0795403	0.0757773		317.8	0.498953	0.507072	0.085486	0.088263	0.00883515	0.00881281	0.00469275	0.00694616	0.0353126	0.0379884	0.00623261	0.00760848	0.233423	0.242799		317.8	8.68e-05	0	-0.00885	0	-0.00126	0	-0.00499	0	-0.00618	0	-0.00053	0	-0.0009	0
318	0.0176184	0.0134129	0.0420181	0.0338557	0.238285	0.238066	1.05372	1.08082	0.604924	0.597674	0.0178311	0.0162051	0.0795215	0.0759628		318	0.499304	0.507072	0.0858838	0.0882915	0.00877695	0.00881808	0.00484347	0.00695059	0.0353744	0.038008	0.00650737	0.00761326	0.233185	0.242816		318	0.000352	0	-0.00876	0	-0.00169	0	-0.00516	0	-0.00617	0	-0.00049	0	-0.00066	0
318.2	0.0176131	0.0134469	0.0419877	0.0339406	0.238837	0.238601	1.05493	1.08157	0.606287	0.598705	0.0180062	0.0162462	0.079926	0.0761482		318.2	0.499074	0.507073	0.0852429	0.0883198	0.00865171	0.00882331	0.00463806	0.006955	0.0348643	0.0380274	0.0065028	0.00761801	0.232904	0.242833		318.2	4.44e-05	0	-0.00915	0	-0.00209	0	-0.0054	0	-0.00646	0	-0.00062	0	-0.00075	0
318.4	0.0172653	0.013481	0.042071	0.0340255	0.239323	0.239135	1.05567	1.08232	0.607628	0.599733	0.0179018	0.0162872	0.0796401	0.0763336		318.4	0.499418	0.507073	0.0851251	0.0883479	0.00809986	0.00882851	0.00461437	0.00695938	0.0342575	0.0380467	0.0059072	0.00762273	0.232698	0.24285		318.4	-0.00042	0	-0.00919	0	-0.00261	0	-0.00591	0	-0.00649	0	-0.00082	0	-0.00093	0
318.6	0.0173482	0.0135151	0.0423685	0.0341105	0.239545	0.239669	1.05633	1.08307	0.609199	0.60076	0.0181044	0.0163282	0.0797739	0.076519		318.6	0.500334	0.507073	0.0861098	0.0883757	0.00895329	0.00883368	0.00525262	0.00696374	0.0347187	0.0380658	0.00658386	0.00762742	0.233241	0.242867		318.6	-0.00085	0	-0.00931	0	-0.00323	0	-0.00669	0	-0.00665	0	-0.00129	0	-0.0015	0
318.8	0.0179518	0.0135491	0.0430931	0.0341954	0.240832	0.240202	1.058	1.08381	0.610518	0.601784	0.0192845	0.0163692	0.0807464	0.0767043		318.8	0.500749	0.507073	0.0858964	0.0884033	0.00902297	0.00883882	0.00539321	0.00696806	0.0344383	0.0380849	0.00640636	0.00763208	0.232978	0.242883		318.8	-0.00024	0	-0.00918	0	-0.00325	0	-0.00677	0	-0.00628	0	-0.00108	0	-0.00111	0
319	0.0186683	0.0135832	0.0434055	0.0342803	0.241231	0.240735	1.05937	1.08455	0.611758	0.602807	0.0200727	0.0164103	0.0813589	0.0768896		319	0.501099	0.507073	0.0861213	0.0884306	0.00893768	0.00884393	0.00572598	0.00697237	0.0345739	0.0381037	0.00650157	0.00763672	0.233255	0.242899		319	0.000359	0	-0.00891	0	-0.00313	0	-0.00704	0	-0.00626	0	-0.00095	0	-0.00029	0
319.2	0.0194551	0.0136172	0.0441744	0.0343652	0.242457	0.241268	1.06074	1.08528	0.613655	0.603827	0.0210588	0.0164513	0.082309	0.0770748		319.2	0.501638	0.507074	0.0863055	0.0884577	0.00917926	0.008849	0.00577796	0.00697664	0.0347828	0.0381225	0.00692803	0.00764132	0.233434	0.242915		319.2	0.000465	0	-0.00938	0	-0.00307	0	-0.00719	0	-0.00653	0	-0.00138	0	-0.00018	0
319.4	0.0197308	0.0136513	0.0448006	0.0344501	0.243481	0.241801	1.06163	1.08601	0.615442	0.604846	0.0216571	0.0164923	0.0833383	0.07726		319.4	0.501991	0.507074	0.0860061	0.0884846	0.00913762	0.00885404	0.00536333	0.00698089	0.0342944	0.0381412	0.00649524	0.0076459	0.23308	0.242931		319.4	-8.6e-05	0	-0.00938	0	-0.00371	0	-0.0078	0	-0.00669	0	-0.00229	0	-0.00099	0
319.6	0.0205689	0.0136853	0.0453341	0.034535	0.244788	0.242333	1.06331	1.08674	0.61712	0.605863	0.0229361	0.0165333	0.0846222	0.0774451		319.6	0.501528	0.507074	0.0853817	0.0885113	0.00890284	0.00885905	0.00537939	0.00698512	0.0335464	0.0381597	0.00634207	0.00765045	0.233079	0.242947		319.6	0.000153	0	-0.00937	0	-0.00377	0	-0.00742	0	-0.00677	0	-0.00212	0	-0.00091	0
319.8	0.0205786	0.0137194	0.0456079	0.0346199	0.245445	0.242864	1.06402	1.08746	0.617673	0.606877	0.0231759	0.0165743	0.0849491	0.0776302		319.8	0.501548	0.507074	0.0849152	0.0885377	0.00908512	0.00886403	0.00520509	0.00698932	0.0332493	0.0381781	0.0059622	0.00765498	0.233026	0.242962		319.8	-2.6e-05	0	-0.00885	0	-0.00376	0	-0.00731	0	-0.00665	0	-0.0021	0	-0.00096	0
320	0.0208585	0.0137534	0.046042	0.0347047	0.246274	0.243396	1.0649	1.08818	0.618433	0.60789	0.0232606	0.0166153	0.0850333	0.0778152		320	0.501225	0.507074	0.0845654	0.088564	0.00876337	0.00886898	0.00552264	0.00699349	0.0335062	0.0381963	0.0057665	0.00765947	0.232873	0.242977		320	0.000177	0	-0.00876	0	-0.00412	0	-0.0075	0	-0.00699	0	-0.00211	0	-0.0009	0
320.2	0.0197511	0.0137875	0.0459203	0.0347896	0.246453	0.243927	1.06504	1.08889	0.618697	0.608901	0.0227612	0.0166563	0.0844891	0.0780002		320.2	0.50134	0.507074	0.0849747	0.08859	0.00877521	0.0088739	0.00628655	0.00699764	0.0338693	0.0382145	0.00603491	0.00766394	0.233454	0.242992		320.2	-6.5e-05	0	-0.00928	0	-0.00468	0	-0.00785	0	-0.0073	0	-0.00215	0	-0.00102	0
320.4	0.0198663	0.0138215	0.0460593	0.0348744	0.247434	0.244457	1.06566	1.0896	0.620075	0.60991	0.02325	0.0166973	0.0849081	0.0781851		320.4	0.500987	0.507075	0.085264	0.0886157	0.00835087	0.00887879	0.00614416	0.00700177	0.0337846	0.0382325	0.00615463	0.00766838	0.233428	0.243007		320.4	-0.00037	0	-0.00952	0	-0.00497	0	-0.00773	0	-0.00727	0	-0.00242	0	-0.00126	0
320.6	0.0204162	0.0138556	0.046573	0.0349593	0.248108	0.244988	1.06626	1.0903	0.621199	0.610917	0.0230642	0.0167383	0.0850138	0.07837		320.6	0.501133	0.507075	0.0860607	0.0886413	0.00873418	0.00888364	0.00638396	0.00700587	0.0340674	0.0382504	0.00636888	0.0076728	0.234118	0.243021		320.6	-0.00048	0	-0.00944	0	-0.00488	0	-0.00786	0	-0.00713	0	-0.00235	0	-0.00086	0
320.8	0.0205675	0.0138896	0.0466331	0.0350441	0.248026	0.245518	1.06662	1.09101	0.621864	0.611922	0.0230659	0.0167793	0.0850617	0.0785549		320.8	0.500709	0.507075	0.0858847	0.0886666	0.00855372	0.00888847	0.00604049	0.00700994	0.0342979	0.0382682	0.00639593	0.00767719	0.234199	0.243035		320.8	-0.00127	0	-0.01034	0	-0.00566	0	-0.00807	0	-0.00774	0	-0.00279	0	-0.00142	0
321	0.0204604	0.0139237	0.0469945	0.0351289	0.248735	0.246047	1.06713	1.0917	0.623044	0.612926	0.0232037	0.0168203	0.0851138	0.0787397		321	0.500755	0.507075	0.0859308	0.0886917	0.00860897	0.00889326	0.00579147	0.00701399	0.0345169	0.0382858	0.00661997	0.00768155	0.234687	0.243049		321	-0.00123	0	-0.01012	0	-0.00507	0	-0.00805	0	-0.00803	0	-0.00232	0	-0.00158	0
321.2	0.0203039	0.0139577	0.0468938	0.0352137	0.249175	0.246576	1.06717	1.0924	0.623947	0.613927	0.0225358	0.0168613	0.0850695	0.0789244		321.2	0.500972	0.507075	0.0860461	0.0887167	0.00919489	0.00889803	0.00623474	0.00701802	0.0347074	0.0383033	0.00733916	0.00768588	0.234972	0.243063		321.2	-0.0005	0	-0.00954	0	-0.00464	0	-0.00733	0	-0.00753	0	-0.00131	0	-0.00073	0
321.4	0.020628	0.0139918	0.0472662	0.0352985	0.249389	0.247105	1.0672	1.09309	0.625431	0.614926	0.0223542	0.0169023	0.0853193	0.0791092		321.4	0.50105	0.507075	0.0863174	0.0887414	0.0091972	0.00890277	0.00605865	0.00702202	0.0346009	0.0383208	0.00724459	0.00769019	0.235374	0.243077		321.4	-0.00072	0	-0.01046	0	-0.00493	0	-0.0075	0	-0.00798	0	-0.0015	0	-0.00103	0
321.6	0.0205502	0.0140258	0.0474497	0.0353833	0.249769	0.247634	1.06775	1.09377	0.626655	0.615924	0.0223977	0.0169433	0.0856004	0.0792938		321.6	0.50108	0.507075	0.0858466	0.0887658	0.00942712	0.00890747	0.00609471	0.007026	0.0343714	0.038338	0.00745017	0.00769447	0.235701	0.243091		321.6	-0.0009	0	-0.01035	0	-0.0049	0	-0.00787	0	-0.00827	0	-0.00149	0	-0.00171	0
321.8	0.0205117	0.0140598	0.0475151	0.0354681	0.250438	0.248162	1.06825	1.09445	0.627913	0.616919	0.0223968	0.0169843	0.0855426	0.0794784		321.8	0.501523	0.507076	0.0859402	0.0887901	0.0096047	0.00891215	0.00590957	0.00702996	0.0346191	0.0383552	0.00743895	0.00769873	0.235793	0.243104		321.8	-0.00112	0	-0.01034	0	-0.00443	0	-0.00795	0	-0.00802	0	-0.00171	0	-0.00181	0
322	0.0207223	0.0140938	0.0477201	0.0355529	0.2513	0.24869	1.06921	1.09513	0.628681	0.617913	0.0224382	0.0170253	0.0860998	0.079663		322	0.50153	0.507076	0.0863026	0.0888142	0.00988002	0.0089168	0.00622817	0.00703389	0.0346743	0.0383723	0.00785095	0.00770296	0.23572	0.243117		322	-0.00176	0	-0.00998	0	-0.00476	0	-0.00806	0	-0.00773	0	-0.00198	0	-0.00161	0
322.2	0.0207807	0.0141279	0.0478815	0.0356376	0.251442	0.249217	1.06953	1.09581	0.629537	0.618905	0.0220108	0.0170663	0.0860261	0.0798475		322.2	0.501134	0.507076	0.0859134	0.0888381	0.00962273	0.00892142	0.00570566	0.00703779	0.0341049	0.0383892	0.00765501	0.00770716	0.235224	0.24313		322.2	-0.00199	0	-0.01002	0	-0.00421	0	-0.00807	0	-0.00709	0	-0.00182	0	-0.00177	0
322.4	0.0202058	0.0141619	0.0475554	0.0357224	0.251586	0.249744	1.06954	1.09648	0.630112	0.619895	0.0214508	0.0171072	0.0856168	0.080032		322.4	0.501884	0.507076	0.0858467	0.0888618	0.00992345	0.00892601	0.00574814	0.00704168	0.034859	0.0384061	0.0077786	0.00771134	0.235191	0.243143		322.4	-0.00201	0	-0.00965	0	-0.00401	0	-0.00824	0	-0.00674	0	-0.00231	0	-0.00205	0
322.6	0.0199166	0.0141959	0.0473512	0.0358071	0.251721	0.250271	1.07014	1.09714	0.630962	0.620882	0.0211325	0.0171482	0.0860753	0.0802164		322.6	0.501985	0.507076	0.0860304	0.0888853	0.0103172	0.00893057	0.00623433	0.00704554	0.0351428	0.0384228	0.00766271	0.0077155	0.235465	0.243156		322.6	-0.002	0	-0.00942	0	-0.00361	0	-0.00821	0	-0.00597	0	-0.00194	0	-0.00208	0
322.8	0.0199459	0.01423	0.0477619	0.0358919	0.252384	0.250798	1.07153	1.09781	0.631593	0.621869	0.0217158	0.0171892	0.0870559	0.0804008		322.8	0.501958	0.507076	0.0858106	0.0889085	0.0103214	0.0089351	0.00616002	0.00704937	0.0352131	0.0384394	0.00734945	0.00771963	0.235655	0.243168		322.8	-0.00183	0	-0.0092	0	-0.00277	0	-0.00763	0	-0.00562	0	-0.0017	0	-0.00184	0
323	0.0202438	0.014264	0.0477323	0.0359766	0.252338	0.251324	1.07254	1.09846	0.632652	0.622853	0.0213953	0.0172301	0.087679	0.0805852		323	0.501527	0.507076	0.0857857	0.0889316	0.00969395	0.0089396	0.00581335	0.00705319	0.0349495	0.0384559	0.00722748	0.00772373	0.235516	0.243181		323	-0.00192	0	-0.0089	0	-0.00255	0	-0.00692	0	-0.00563	0	-0.00157	0	-0.00155	0
323.2	0.0207737	0.014298	0.048012	0.0360613	0.253115	0.251849	1.07341	1.09912	0.634123	0.623835	0.0217731	0.0172711	0.0885273	0.0807695		323.2	0.501425	0.507076	0.08596	0.0889545	0.00968675	0.00894408	0.00599556	0.00705698	0.0351117	0.0384722	0.00729558	0.00772781	0.235531	0.243193		323.2	-0.00191	0	-0.00925	0	-0.00192	0	-0.00622	0	-0.0056	0	-0.00178	0	-0.00126	0
323.4	0.0208014	0.014332	0.0475278	0.036146	0.253596	0.252375	1.07405	1.09977	0.634882	0.624816	0.0212451	0.0173121	0.0887559	0.0809537		323.4	0.501373	0.507076	0.0852835	0.0889772	0.00943277	0.00894853	0.00588457	0.00706075	0.0346757	0.0384885	0.00633975	0.00773186	0.235197	0.243205		323.4	-0.00113	0	-0.00841	0	-0.00133	0	-0.00551	0	-0.00488	0	-0.00111	0	-0.00112	0
323.6	0.0207945	0.0143661	0.0472401	0.0362307	0.254344	0.2529	1.07514	1.10042	0.635714	0.625794	0.0213215	0.017353	0.0887967	0.081138		323.6	0.501369	0.507077	0.0853641	0.0889997	0.00952534	0.00895295	0.00615778	0.00706449	0.0341086	0.0385047	0.00649186	0.00773589	0.235396	0.243217		323.6	-0.00092	0	-0.00862	0	-0.00148	0	-0.00543	0	-0.00543	0	-0.00106	0	-0.0011	0
323.8	0.0202231	0.0144001	0.0465053	0.0363154	0.253851	0.253425	1.07491	1.10106	0.635407	0.626771	0.0202866	0.017394	0.087775	0.0813221		323.8	0.502071	0.507077	0.0855733	0.089022	0.00947551	0.00895734	0.00659707	0.00706822	0.0342863	0.0385207	0.00654257	0.0077399	0.235328	0.243228		323.8	-0.00111	0	-0.00866	0	-0.00182	0	-0.00559	0	-0.00589	0	-0.00149	0	-0.00129	0
324	0.0199818	0.0144341	0.0461747	0.0364001	0.254194	0.253949	1.07518	1.1017	0.635629	0.627746	0.019738	0.017435	0.087089	0.0815062		324	0.502297	0.507077	0.0856532	0.0890441	0.00911759	0.00896171	0.00665987	0.00707192	0.0346668	0.0385366	0.00687877	0.00774388	0.235475	0.24324		324	-0.00045	0	-0.00873	0	-0.00255	0	-0.00589	0	-0.00657	0	-0.00193	0	-0.00154	0
324.2	0.019051	0.0144681	0.0458442	0.0364847	0.254317	0.254473	1.0754	1.10234	0.636197	0.628719	0.0192996	0.0174759	0.0865522	0.0816903		324.2	0.502911	0.507077	0.08607	0.0890661	0.00917789	0.00896605	0.00742042	0.0070756	0.0351861	0.0385525	0.0073363	0.00774784	0.235928	0.243251		324.2	-0.00033	0	-0.00907	0	-0.00271	0	-0.00611	0	-0.00662	0	-0.00166	0	-0.00149	0
324.4	0.0196536	0.0145021	0.0459582	0.0365694	0.255654	0.254997	1.07633	1.10298	0.637764	0.62969	0.0196702	0.0175169	0.0871111	0.0818743		324.4	0.503093	0.507077	0.0858534	0.0890878	0.00879342	0.00897036	0.00673062	0.00707925	0.0349877	0.0385682	0.00725342	0.00775177	0.235565	0.243262		324.4	0.000172	0	-0.00891	0	-0.00253	0	-0.00599	0	-0.00676	0	-0.00116	0	-0.00135	0
324.6	0.019951	0.0145361	0.0458244	0.036654	0.255838	0.25552	1.077	1.10361	0.638879	0.630659	0.0196701	0.0175578	0.0873902	0.0820583		324.6	0.503778	0.507077	0.086098	0.0891094	0.00888881	0.00897464	0.00682437	0.00708289	0.0353297	0.0385838	0.00717702	0.00775568	0.236009	0.243274		324.6	-0.00015	0	-0.00903	0	-0.00269	0	-0.00639	0	-0.00734	0	-0.00146	0	-0.00126	0
324.8	0.0201953	0.0145701	0.0462098	0.0367387	0.256098	0.256043	1.07761	1.10423	0.639626	0.631626	0.0203568	0.0175987	0.0874987	0.0822422		324.8	0.503391	0.507077	0.0856474	0.0891308	0.00814173	0.0089789	0.00612034	0.0070865	0.0350776	0.0385993	0.00658818	0.00775956	0.235895	0.243284		324.8	5.02e-05	0	-0.00913	0	-0.00309	0	-0.00645	0	-0.00731	0	-0.0014	0	-0.00103	0
325	0.0199188	0.0146041	0.0461195	0.0368233	0.256344	0.256565	1.07806	1.10485	0.640336	0.632592	0.020406	0.0176397	0.0874156	0.0824261		325	0.503375	0.507077	0.0855434	0.089152	0.00787844	0.00898313	0.00614716	0.00709009	0.0353077	0.0386147	0.00689829	0.00776342	0.236031	0.243295		325	0.000578	0	-0.00836	0	-0.00274	0	-0.00627	0	-0.00704	0	-0.00073	0	-0.00052	0
325.2	0.0200991	0.0146382	0.0459013	0.0369079	0.256692	0.257088	1.07837	1.10547	0.641073	0.633556	0.0202285	0.0176806	0.0873446	0.08261		325.2	0.503406	0.507077	0.0858108	0.089173	0.00794025	0.00898733	0.00603821	0.00709366	0.0353526	0.03863	0.00696154	0.00776726	0.235971	0.243306		325.2	0.000931	0	-0.00856	0	-0.00282	0	-0.00611	0	-0.00706	0	-0.00111	0	-0.00028	0
325.4	0.0200485	0.0146722	0.0462459	0.0369925	0.257042	0.25761	1.07866	1.10609	0.642354	0.634518	0.0204395	0.0177216	0.0874488	0.0827937		325.4	0.503368	0.507077	0.0858331	0.0891939	0.00759585	0.00899151	0.00565084	0.00709721	0.0355145	0.0386452	0.00662569	0.00777108	0.236146	0.243316		325.4	0.000155	0	-0.00894	0	-0.00319	0	-0.00699	0	-0.00725	0	-0.00134	0	-0.00045	0
325.6	0.020591	0.0147062	0.0463842	0.0370772	0.257865	0.258131	1.0791	1.1067	0.643278	0.635478	0.0204812	0.0177625	0.087762	0.0829775		325.6	0.502578	0.507077	0.084917	0.0892145	0.00733419	0.00899566	0.00491439	0.00710074	0.0347398	0.0386603	0.0059941	0.00777487	0.235558	0.243327		325.6	0.00023	0	-0.00794	0	-0.00302	0	-0.00714	0	-0.00677	0	-0.00107	0	-0.00019	0
325.8	0.0207328	0.0147402	0.0465059	0.0371617	0.258631	0.258652	1.07984	1.10731	0.644295	0.636436	0.0206158	0.0178034	0.0877879	0.0831612		325.8	0.502753	0.507078	0.08531	0.089235	0.00766661	0.00899979	0.00452345	0.00710424	0.0347225	0.0386753	0.00586718	0.00777864	0.23594	0.243337		325.8	0.000218	0	-0.00805	0	-0.0028	0	-0.0071	0	-0.00639	0	-0.00141	0	-0.00021	0
326	0.0199843	0.0147742	0.0461162	0.0372463	0.258474	0.259173	1.07975	1.10792	0.644655	0.637392	0.0201606	0.0178444	0.0876607	0.0833448		326	0.501958	0.507078	0.0850467	0.0892553	0.00747054	0.00900389	0.0039943	0.00710773	0.034356	0.0386901	0.00510907	0.00778238	0.235461	0.243347		326	0.000177	0	-0.00836	0	-0.00268	0	-0.0069	0	-0.00614	0	-0.00182	0	-3.3e-05	0
326.2	0.0196681	0.0148082	0.0462981	0.0373309	0.258703	0.259694	1.07994	1.10852	0.645333	0.638347	0.0201143	0.0178853	0.0878691	0.0835285		326.2	0.50211	0.507078	0.0851104	0.0892755	0.00772344	0.00900796	0.00354229	0.00711119	0.0342741	0.0387049	0.00486168	0.00778611	0.2354	0.243357		326.2	3.57e-05	0	-0.0084	0	-0.00227	0	-0.00711	0	-0.00556	0	-0.00199	0	-0.00037	0
326.4	0.0185419	0.0148422	0.0462894	0.0374155	0.259182	0.260214	1.08086	1.10912	0.646437	0.639299	0.0201921	0.0179262	0.0881688	0.083712		326.4	0.501687	0.507078	0.0850035	0.0892955	0.00825541	0.00901201	0.00338108	0.00711464	0.0343965	0.0387196	0.00485202	0.00778981	0.235349	0.243367		326.4	-0.00064	0	-0.00864	0	-0.00252	0	-0.00729	0	-0.0058	0	-0.00228	0	-0.00096	0
326.6	0.0184957	0.0148762	0.0462512	0.0375	0.259385	0.260734	1.08145	1.10971	0.64763	0.64025	0.0204134	0.0179671	0.0888834	0.0838955		326.6	0.501393	0.507078	0.0849062	0.0893153	0.00859423	0.00901604	0.00402081	0.00711806	0.0339813	0.0387342	0.00480214	0.00779349	0.23543	0.243376		326.6	-0.00117	0	-0.00847	0	-0.00244	0	-0.00708	0	-0.00519	0	-0.00196	0	-0.00083	0
326.8	0.0187085	0.0149102	0.0470038	0.0375846	0.260104	0.261253	1.08273	1.1103	0.649292	0.641199	0.0209203	0.0180081	0.0895322	0.084079		326.8	0.500805	0.507078	0.085059	0.0893349	0.00896599	0.00902003	0.00417165	0.00712146	0.0335805	0.0387487	0.00436717	0.00779714	0.235517	0.243386		326.8	-0.00118	0	-0.00893	0	-0.00232	0	-0.00693	0	-0.0049	0	-0.00214	0	-0.00062	0
327	0.019675	0.0149441	0.0476835	0.0376691	0.261041	0.261772	1.084	1.11089	0.651534	0.642147	0.0213166	0.018049	0.0904199	0.0842625		327	0.50064	0.507078	0.085212	0.0893544	0.00905379	0.00902401	0.0043359	0.00712484	0.0332909	0.0387631	0.00435892	0.00780078	0.235089	0.243395		327	-0.00119	0	-0.0095	0	-0.00311	0	-0.00715	0	-0.00479	0	-0.00234	0	-0.00064	0
327.2	0.0197271	0.0149781	0.047609	0.0377536	0.262	0.262291	1.08447	1.11148	0.652747	0.643092	0.0216704	0.0180899	0.0909466	0.0844458		327.2	0.500814	0.507078	0.0857727	0.0893737	0.00963951	0.00902796	0.00457373	0.0071282	0.0334911	0.0387774	0.00463467	0.00780439	0.235257	0.243405		327.2	-0.00066	0	-0.00973	0	-0.00268	0	-0.00696	0	-0.00456	0	-0.00276	0	-0.00047	0
327.4	0.0196419	0.0150121	0.0476696	0.0378382	0.262987	0.26281	1.08489	1.11206	0.654013	0.644036	0.0215322	0.0181308	0.0909239	0.0846292		327.4	0.500464	0.507078	0.085114	0.0893929	0.00940067	0.00903188	0.00419584	0.00713154	0.0328802	0.0387916	0.00398283	0.00780798	0.234719	0.243414		327.4	-0.00067	0	-0.0095	0	-0.00286	0	-0.0069	0	-0.00473	0	-0.00305	0	-0.00123	0
327.6	0.0200668	0.0150461	0.0479946	0.0379227	0.263895	0.263328	1.08575	1.11264	0.655456	0.644978	0.021955	0.0181717	0.091679	0.0848125		327.6	0.500744	0.507078	0.0853337	0.0894119	0.00983913	0.00903578	0.00458127	0.00713486	0.0329786	0.0388056	0.00460437	0.00781154	0.23524	0.243423		327.6	-0.00098	0	-0.01018	0	-0.00379	0	-0.00724	0	-0.00522	0	-0.00361	0	-0.00136	0
327.8	0.0208592	0.0150801	0.0484271	0.0380072	0.264873	0.263845	1.08591	1.11321	0.656426	0.645918	0.0221611	0.0182126	0.0918111	0.0849957		327.8	0.501146	0.507078	0.0850741	0.0894307	0.00966912	0.00903966	0.00486481	0.00713817	0.0331283	0.0388196	0.00459742	0.00781509	0.234962	0.243432		327.8	-0.00089	0	-0.01002	0	-0.00391	0	-0.00708	0	-0.00539	0	-0.00382	0	-0.00112	0
328	0.0215966	0.0151141	0.0489572	0.0380917	0.265729	0.264363	1.08665	1.11379	0.657637	0.646856	0.0228404	0.0182535	0.0921329	0.0851789		328	0.500848	0.507078	0.0850395	0.0894494	0.0098084	0.00904351	0.00465102	0.00714145	0.0331788	0.0388335	0.00465036	0.00781862	0.234487	0.243441		328	-0.0008	0	-0.00996	0	-0.00414	0	-0.00759	0	-0.00577	0	-0.00391	0	-0.00132	0
328.2	0.0223425	0.0151481	0.0495602	0.0381761	0.267026	0.26488	1.08734	1.11436	0.658563	0.647792	0.0237314	0.0182944	0.0924337	0.0853621		328.2	0.500976	0.507078	0.0847831	0.0894679	0.00963548	0.00904733	0.00496385	0.00714471	0.0333672	0.0388474	0.00459106	0.00782212	0.234162	0.243449		328.2	-0.00128	0	-0.01089	0	-0.00431	0	-0.00787	0	-0.00619	0	-0.00364	0	-0.00147	0
328.4	0.0236775	0.015182	0.0505421	0.0382606	0.268296	0.265397	1.08861	1.11492	0.659959	0.648727	0.0246885	0.0183353	0.0927142	0.0855452		328.4	0.50124	0.507078	0.084473	0.0894862	0.00921207	0.00905114	0.00434767	0.00714795	0.0334701	0.0388611	0.00447545	0.0078256	0.233871	0.243458		328.4	-0.00115	0	-0.01087	0	-0.00443	0	-0.00775	0	-0.00704	0	-0.00377	0	-0.0015	0
328.6	0.0237563	0.015216	0.0503541	0.0383451	0.268146	0.265913	1.08893	1.11548	0.660821	0.64966	0.024874	0.0183762	0.0926216	0.0857282		328.6	0.501055	0.507078	0.0842857	0.0895044	0.00858151	0.00905492	0.00424494	0.00715117	0.0333782	0.0388747	0.00431101	0.00782906	0.233792	0.243466		328.6	-0.00115	0	-0.01048	0	-0.00427	0	-0.0071	0	-0.00691	0	-0.00386	0	-0.00104	0
328.8	0.0240303	0.01525	0.0510192	0.0384295	0.268795	0.266429	1.08987	1.11604	0.661826	0.650591	0.0254845	0.0184171	0.0929566	0.0859112		328.8	0.500466	0.507078	0.0837937	0.0895225	0.00772944	0.00905867	0.00370518	0.00715437	0.033288	0.0388882	0.00437221	0.0078325	0.233723	0.243475		328.8	-0.00083	0	-0.01002	0	-0.00395	0	-0.00706	0	-0.00695	0	-0.00328	0	-0.00073	0
329	0.0240872	0.015284	0.0504672	0.038514	0.269383	0.266945	1.08999	1.1166	0.661994	0.65152	0.0249926	0.018458	0.0929127	0.0860942		329	0.500354	0.507078	0.0834903	0.0895404	0.00746776	0.0090624	0.0039552	0.00715756	0.0335382	0.0389017	0.00499038	0.00783592	0.233905	0.243483		329	-0.00021	0	-0.00972	0	-0.00354	0	-0.00672	0	-0.00753	0	-0.00258	0	-0.00033	0
329.2	0.0246762	0.015318	0.0506531	0.0385984	0.270291	0.26746	1.09018	1.11715	0.663317	0.652448	0.0248184	0.0184989	0.0930436	0.0862771		329.2	0.500587	0.507078	0.083555	0.0895581	0.00732776	0.00906611	0.00371302	0.00716072	0.0337363	0.038915	0.00494611	0.00783932	0.233832	0.243491		329.2	-0.00032	0	-0.00997	0	-0.00321	0	-0.00661	0	-0.0081	0	-0.00239	0	-0.00026	0
329.4	0.0244291	0.0153519	0.0501172	0.0386828	0.27011	0.267975	1.09025	1.1177	0.663857	0.653374	0.024177	0.0185398	0.0925509	0.08646		329.4	0.500669	0.507079	0.0835825	0.0895757	0.00695498	0.0090698	0.00390992	0.00716387	0.0335874	0.0389282	0.00458279	0.0078427	0.234189	0.243499		329.4	-0.0005	0	-0.00984	0	-0.00363	0	-0.00686	0	-0.00841	0	-0.00192	0	-0.00022	0
329.6	0.0247339	0.0153859	0.0499638	0.0387673	0.270205	0.26849	1.09073	1.11825	0.664292	0.654298	0.0237502	0.0185806	0.092063	0.0866429		329.6	0.500389	0.507079	0.0832436	0.0895932	0.00674192	0.00907346	0.00364664	0.007167	0.0331741	0.0389414	0.00447418	0.00784606	0.233951	0.243507		329.6	-0.00021	0	-0.00919	0	-0.00339	0	-0.00658	0	-0.0084	0	-0.00148	0	0.000278	0
329.8	0.0243501	0.0154199	0.0498148	0.0388517	0.270155	0.269004	1.09122	1.11879	0.664714	0.65522	0.0233651	0.0186215	0.0917451	0.0868257		329.8	0.500593	0.507079	0.0834708	0.0896105	0.00671166	0.0090771	0.00346875	0.0071701	0.0331025	0.0389545	0.00437466	0.00784939	0.234125	0.243515		329.8	-0.00051	0	-0.00942	0	-0.00328	0	-0.00673	0	-0.00859	0	-0.00137	0	0.000192	0
330	0.0231626	0.0154538	0.0492848	0.0389361	0.269653	0.269518	1.09078	1.11933	0.664863	0.65614	0.0221788	0.0186624	0.0912929	0.0870084		330	0.500857	0.507079	0.0834716	0.0896276	0.00663105	0.00908072	0.00353622	0.00717319	0.0334191	0.0389675	0.00420617	0.00785271	0.234021	0.243522		330	-0.00114	0	-0.01005	0	-0.00369	0	-0.00726	0	-0.00907	0	-0.00157	0	-0.00051	0
330.2	0.0228332	0.0154878	0.0492467	0.0390204	0.270189	0.270032	1.09149	1.11987	0.666025	0.657059	0.021955	0.0187033	0.0916608	0.0871911		330.2	0.501014	0.507079	0.0835766	0.0896446	0.00667659	0.00908431	0.00379101	0.00717626	0.0332861	0.0389804	0.00416353	0.00785601	0.234346	0.24353		330.2	-0.00125	0	-0.01013	0	-0.00369	0	-0.00746	0	-0.00884	0	-0.00137	0	-0.00036	0
330.4	0.0223525	0.0155218	0.0490256	0.0391048	0.270692	0.270545	1.09222	1.12041	0.666735	0.657976	0.0223332	0.0187442	0.0921011	0.0873738		330.4	0.50036	0.507079	0.0835191	0.0896615	0.00660582	0.00908789	0.00362562	0.00717932	0.0325759	0.0389932	0.00381671	0.00785928	0.234304	0.243538		330.4	-0.00114	0	-0.01022	0	-0.00388	0	-0.00734	0	-0.00902	0	-0.00075	0	-0.00044	0
330.6	0.0224782	0.0155557	0.0490493	0.0391892	0.2713	0.271058	1.09287	1.12094	0.66783	0.658891	0.0228367	0.018785	0.0922324	0.0875564		330.6	0.501004	0.507079	0.083838	0.0896782	0.00696172	0.00909144	0.00412414	0.00718235	0.032914	0.0390059	0.00388033	0.00786254	0.234854	0.243545		330.6	-0.00126	0	-0.01037	0	-0.00404	0	-0.00804	0	-0.00861	0	-0.00097	0	-0.00048	0
330.8	0.0224281	0.0155897	0.0492483	0.0392736	0.271937	0.271571	1.0939	1.12147	0.668547	0.659805	0.0226393	0.0188259	0.0922279	0.0877389		330.8	0.501387	0.507079	0.0845706	0.0896948	0.00729007	0.00909496	0.00438054	0.00718537	0.0331312	0.0390185	0.0033906	0.00786578	0.235167	0.243552		330.8	-0.00136	0	-0.01095	0	-0.00428	0	-0.00861	0	-0.00854	0	-0.00119	0	-0.001	0
331	0.0228705	0.0156236	0.0496556	0.0393579	0.27293	0.272083	1.09485	1.12199	0.670263	0.660717	0.0233717	0.0188668	0.0931754	0.0879214		331	0.502336	0.507079	0.0852488	0.0897112	0.007442	0.00909847	0.00461461	0.00718836	0.0335924	0.0390311	0.00401325	0.007869	0.235444	0.243559		331	-0.00127	0	-0.01092	0	-0.00463	0	-0.00861	0	-0.00833	0	-0.00156	0	-0.00125	0
331.2	0.0229899	0.0156576	0.0500174	0.0394422	0.273604	0.272595	1.09516	1.12252	0.671326	0.661626	0.0238341	0.0189076	0.0935985	0.0881039		331.2	0.502826	0.507079	0.0857329	0.0897275	0.00803926	0.00910195	0.0048247	0.00719134	0.0338721	0.0390436	0.00429706	0.00787219	0.235888	0.243567		331.2	-0.00095	0	-0.01035	0	-0.00396	0	-0.00817	0	-0.00769	0	-0.00137	0	-0.00075	0
331.4	0.0234158	0.0156915	0.0505832	0.0395266	0.274381	0.273106	1.09629	1.12303	0.673104	0.662535	0.0243163	0.0189485	0.0943591	0.0882863		331.4	0.502948	0.507079	0.0855011	0.0897437	0.00792094	0.00910541	0.00542524	0.00719431	0.0343351	0.0390559	0.00415611	0.00787537	0.236102	0.243574		331.4	-0.00167	0	-0.01053	0	-0.00454	0	-0.00837	0	-0.00778	0	-0.00201	0	-0.00093	0
331.6	0.0239817	0.0157255	0.0507861	0.0396109	0.274742	0.273618	1.0967	1.12355	0.674296	0.663441	0.0249159	0.0189893	0.0947242	0.0884687		331.6	0.503442	0.507079	0.0859046	0.0897597	0.00833832	0.00910885	0.0058392	0.00719725	0.034788	0.0390682	0.00448259	0.00787853	0.236401	0.24358		331.6	-0.00152	0	-0.01001	0	-0.00485	0	-0.00815	0	-0.00729	0	-0.00206	0	-0.00039	0
331.8	0.0242989	0.0157595	0.0512193	0.0396952	0.275245	0.274129	1.09746	1.12407	0.675357	0.664346	0.0254674	0.0190302	0.0949747	0.0886511		331.8	0.504266	0.507079	0.0862453	0.0897756	0.00842233	0.00911227	0.00584705	0.00720018	0.0346286	0.0390805	0.00461035	0.00788167	0.236394	0.243587		331.8	-0.00182	0	-0.00955	0	-0.00481	0	-0.00825	0	-0.00717	0	-0.00209	0	-0.00038	0
332	0.0245851	0.0157934	0.0513747	0.0397795	0.275468	0.274639	1.09843	1.12458	0.676182	0.665249	0.0262387	0.019071	0.0952052	0.0888334		332	0.503684	0.507079	0.0863078	0.0897914	0.00863533	0.00911567	0.0056376	0.00720309	0.0346843	0.0390926	0.00421623	0.00788479	0.235932	0.243594		332	-0.00167	0	-0.00966	0	-0.00492	0	-0.00876	0	-0.00698	0	-0.00282	0	-0.00075	0
332.2	0.0246314	0.0158274	0.0516395	0.0398638	0.275818	0.275149	1.09935	1.12508	0.67665	0.66615	0.0265564	0.0191119	0.0952764	0.0890156		332.2	0.503596	0.507079	0.0860879	0.089807	0.00828507	0.00911905	0.00536276	0.00720598	0.0351741	0.0391046	0.00415766	0.00788789	0.235745	0.243601		332.2	-0.00147	0	-0.00974	0	-0.00476	0	-0.00848	0	-0.00725	0	-0.00303	0	-0.00068	0
332.4	0.0248392	0.0158613	0.051806	0.0399481	0.275807	0.275659	1.10024	1.12559	0.677325	0.66705	0.026988	0.0191527	0.0956366	0.0891978		332.4	0.503652	0.507079	0.0859387	0.0898225	0.00841046	0.0091224	0.00499191	0.00720885	0.0353571	0.0391166	0.00462177	0.00789098	0.235579	0.243607		332.4	-0.00092	0	-0.00938	0	-0.0043	0	-0.00748	0	-0.00735	0	-0.00362	0	-0.00046	0
332.6	0.0246578	0.0158952	0.0514809	0.0400324	0.276332	0.276169	1.1012	1.12609	0.678477	0.667948	0.0277487	0.0191936	0.0963808	0.0893799		332.6	0.50325	0.507079	0.0860376	0.0898378	0.00782867	0.00912574	0.00466693	0.00721171	0.0346976	0.0391285	0.00449371	0.00789404	0.235116	0.243614		332.6	-0.00017	0	-0.00905	0	-0.00363	0	-0.00675	0	-0.00697	0	-0.00323	0	-0.00025	0
332.8	0.0250527	0.0159292	0.0520514	0.0401166	0.277115	0.276678	1.10223	1.12659	0.679761	0.668844	0.0280306	0.0192344	0.0971791	0.0895621		332.8	0.502862	0.507079	0.0853199	0.0898531	0.00769984	0.00912905	0.00444776	0.00721455	0.0342605	0.0391403	0.00438325	0.00789709	0.234751	0.24362		332.8	0.00026	0	-0.00924	0	-0.00329	0	-0.00621	0	-0.00711	0	-0.00274	0	3.98e-05	0
333	0.0245264	0.0159631	0.0511552	0.0402009	0.277253	0.277187	1.10171	1.12709	0.679626	0.669738	0.0272711	0.0192752	0.0970786	0.0897441		333	0.502509	0.507079	0.0852419	0.0898681	0.00743142	0.00913234	0.00422704	0.00721737	0.0339718	0.039152	0.00469547	0.00790012	0.234393	0.243626		333	0.000765	0	-0.00945	0	-0.00343	0	-0.00584	0	-0.00734	0	-0.00281	0	0.000484	0
333.2	0.0239496	0.0159971	0.0508374	0.0402852	0.276936	0.277696	1.10146	1.12758	0.679833	0.670631	0.0265392	0.0193161	0.0968691	0.0899261		333.2	0.502225	0.507079	0.0851271	0.0898831	0.00715503	0.00913561	0.00364654	0.00722018	0.0338969	0.0391636	0.00481788	0.00790313	0.233965	0.243633		333.2	0.000451	0	-0.00946	0	-0.00338	0	-0.00567	0	-0.00743	0	-0.00311	0	0.000343	0
333.4	0.0234698	0.016031	0.0500947	0.0403694	0.276761	0.278204	1.10164	1.12807	0.679977	0.671522	0.0260579	0.0193569	0.096748	0.0901081		333.4	0.50177	0.507079	0.0848991	0.089898	0.00683657	0.00913886	0.00361884	0.00722296	0.033383	0.0391752	0.0046558	0.00790612	0.233672	0.243639		333.4	0.000656	0	-0.00944	0	-0.00364	0	-0.00579	0	-0.00752	0	-0.00329	0	0.000434	0
333.6	0.0234576	0.016065	0.0501129	0.0404536	0.277352	0.278712	1.10212	1.12856	0.680554	0.672412	0.0254006	0.0193977	0.0969145	0.09029		333.6	0.50148	0.507079	0.0841332	0.0899127	0.00664552	0.0091421	0.00258439	0.00722574	0.033075	0.0391867	0.00465444	0.00790909	0.233346	0.243645		333.6	0.000458	0	-0.00991	0	-0.00414	0	-0.00612	0	-0.00796	0	-0.00298	0	0.000427	0
333.8	0.0232417	0.0160989	0.0499586	0.0405379	0.277829	0.279219	1.1019	1.12905	0.680474	0.673299	0.0244251	0.0194386	0.0967583	0.0904719		333.8	0.500758	0.507079	0.0836768	0.0899273	0.00627788	0.00914531	0.00201895	0.00722849	0.0326938	0.0391981	0.00411468	0.00791204	0.233176	0.243651		333.8	-3.3e-05	0	-0.01081	0	-0.00438	0	-0.00621	0	-0.0084	0	-0.00302	0	-3.3e-05	0
334	0.0230749	0.0161328	0.0498394	0.0406221	0.278165	0.279726	1.10177	1.12953	0.680775	0.674185	0.0242802	0.0194794	0.0967368	0.0906538		334	0.500259	0.507079	0.0831766	0.0899418	0.00577246	0.0091485	0.00179466	0.00723123	0.032637	0.0392094	0.00394772	0.00791498	0.232857	0.243656		334	-0.00063	0	-0.01118	0	-0.00446	0	-0.00655	0	-0.00909	0	-0.00314	0	-0.00051	0
334.2	0.0232786	0.0161668	0.0497367	0.0407063	0.279579	0.280233	1.10243	1.13001	0.681482	0.675069	0.0252264	0.0195202	0.0975189	0.0908356		334.2	0.500031	0.507079	0.0827737	0.0899561	0.00559767	0.00915167	0.00166724	0.00723395	0.0322776	0.0392207	0.0035097	0.0079179	0.23323	0.243662		334.2	-0.00049	0	-0.01119	0	-0.00394	0	-0.00661	0	-0.00921	0	-0.00288	0	-0.00036	0
334.4	0.0229539	0.0162007	0.0499019	0.0407905	0.280464	0.28074	1.10249	1.13049	0.682064	0.675952	0.025656	0.019561	0.0976257	0.0910173		334.4	0.499793	0.507079	0.0830815	0.0899704	0.00590977	0.00915482	0.00148842	0.00723666	0.0321701	0.0392319	0.00344603	0.0079208	0.233747	0.243668		334.4	-0.00062	0	-0.01148	0	-0.00391	0	-0.00716	0	-0.00918	0	-0.00269	0	-0.0009	0
334.6	0.0225385	0.0162346	0.0505021	0.0408746	0.281314	0.281246	1.10292	1.13096	0.682722	0.676833	0.0251386	0.0196019	0.0970824	0.091199		334.6	0.500991	0.507079	0.0841075	0.0899845	0.007027	0.00915795	0.00282978	0.00723935	0.0332162	0.039243	0.00456449	0.00792369	0.234887	0.243674		334.6	-0.00107	0	-0.01166	0	-0.00406	0	-0.00754	0	-0.00923	0	-0.00312	0	-0.00131	0
334.8	0.0226947	0.0162685	0.0509637	0.0409588	0.282084	0.281752	1.10308	1.13144	0.683772	0.677712	0.0251819	0.0196427	0.0976026	0.0913806		334.8	0.501946	0.507079	0.0846416	0.0899984	0.00765075	0.00916106	0.00370059	0.00724202	0.0333823	0.039254	0.00494652	0.00792655	0.235854	0.243679		334.8	-0.00192	0	-0.01203	0	-0.00432	0	-0.00776	0	-0.00952	0	-0.00361	0	-0.00157	0
335	0.0232585	0.0163025	0.0518397	0.041043	0.283606	0.282257	1.10392	1.1319	0.68591	0.67859	0.0259634	0.0196835	0.0988228	0.0915623		335	0.502805	0.507079	0.0852689	0.0900123	0.00833952	0.00916416	0.0045632	0.00724468	0.034565	0.0392649	0.00576204	0.0079294	0.237235	0.243685		335	-0.00194	0	-0.01187	0	-0.00405	0	-0.00763	0	-0.0092	0	-0.00343	0	-0.00107	0
335.2	0.0233283	0.0163364	0.0523274	0.0411271	0.284061	0.282763	1.10427	1.13237	0.686572	0.679465	0.0257645	0.0197243	0.0986761	0.0917438		335.2	0.503615	0.507079	0.0858856	0.0900261	0.00926798	0.00916723	0.00525061	0.00724732	0.035463	0.0392758	0.00620569	0.00793223	0.238434	0.24369		335.2	-0.00224	0	-0.01159	0	-0.00403	0	-0.00768	0	-0.00919	0	-0.00351	0	-0.00103	0
335.4	0.0231649	0.0163703	0.0524631	0.0412113	0.28489	0.283267	1.10496	1.13284	0.687746	0.68034	0.0254755	0.0197651	0.0988459	0.0919253		335.4	0.503901	0.507079	0.0862521	0.0900397	0.00968481	0.00917028	0.00602072	0.00724995	0.036283	0.0392866	0.00644616	0.00793505	0.239268	0.243695		335.4	-0.00251	0	-0.01125	0	-0.00433	0	-0.00775	0	-0.00937	0	-0.00385	0	-0.00084	0
335.6	0.0229178	0.0164042	0.052722	0.0412954	0.28503	0.283772	1.1049	1.1333	0.689213	0.681212	0.025623	0.0198059	0.0984926	0.0921068		335.6	0.504252	0.507079	0.0869619	0.0900532	0.00986826	0.00917332	0.00635408	0.00725256	0.0366012	0.0392973	0.00654973	0.00793784	0.239687	0.243701		335.6	-0.00242	0	-0.01068	0	-0.00369	0	-0.00706	0	-0.00888	0	-0.00348	0	-0.00096	0
335.8	0.0232732	0.0164381	0.0530907	0.0413796	0.285715	0.284276	1.10601	1.13376	0.690804	0.682083	0.0259507	0.0198467	0.0993367	0.0922883		335.8	0.504616	0.507079	0.0874032	0.0900666	0.0100767	0.00917633	0.00704037	0.00725515	0.0366974	0.039308	0.006403	0.00794062	0.239677	0.243706		335.8	-0.00266	0	-0.0106	0	-0.00375	0	-0.00722	0	-0.00831	0	-0.00368	0	-0.00125	0
336	0.0231964	0.0164721	0.0530135	0.0414637	0.285918	0.28478	1.10663	1.13421	0.691718	0.682952	0.0260523	0.0198875	0.0993468	0.0924696		336	0.503631	0.507079	0.08734	0.09008	0.00984933	0.00917933	0.00728648	0.00725773	0.0369949	0.0393186	0.0061235	0.00794339	0.239585	0.243711		336	-0.00269	0	-0.01084	0	-0.00345	0	-0.00754	0	-0.00844	0	-0.00423	0	-0.00161	0
336.2	0.0236469	0.016506	0.0531792	0.0415478	0.286478	0.285283	1.1074	1.13467	0.692411	0.68382	0.0261836	0.0199283	0.0997578	0.092651		336.2	0.503738	0.507079	0.0874975	0.0900931	0.00960052	0.00918231	0.00697147	0.00726029	0.037446	0.0393291	0.00621254	0.00794613	0.239275	0.243716		336.2	-0.00245	0	-0.01082	0	-0.00303	0	-0.00726	0	-0.0083	0	-0.00436	0	-0.00165	0
336.4	0.0239123	0.0165399	0.053193	0.0416319	0.28714	0.285787	1.10808	1.13512	0.693363	0.684685	0.0268262	0.0199691	0.10026	0.0928323		336.4	0.503493	0.50708	0.0875625	0.0901062	0.0092644	0.00918527	0.0070567	0.00726284	0.0368158	0.0393395	0.00595226	0.00794887	0.238834	0.243721		336.4	-0.00221	0	-0.01067	0	-0.00271	0	-0.00682	0	-0.00758	0	-0.00449	0	-0.00153	0
336.6	0.0241997	0.0165738	0.0534842	0.041716	0.287519	0.286289	1.10903	1.13557	0.695183	0.68555	0.0270305	0.0200099	0.100902	0.0930135		336.6	0.503069	0.50708	0.0872221	0.0901192	0.00866778	0.00918821	0.00689814	0.00726537	0.0360709	0.0393499	0.00541583	0.00795158	0.238014	0.243726		336.6	-0.00167	0	-0.01077	0	-0.00253	0	-0.00621	0	-0.00691	0	-0.00429	0	-0.00189	0
336.8	0.0242616	0.0166077	0.0532459	0.0418	0.287544	0.286792	1.10921	1.13601	0.696203	0.686412	0.0262086	0.0200507	0.100761	0.0931947		336.8	0.503022	0.50708	0.0864917	0.090132	0.00869434	0.00919113	0.00693681	0.00726789	0.035979	0.0393602	0.00548219	0.00795428	0.237525	0.243731		336.8	-0.00108	0	-0.01074	0	-0.00214	0	-0.00559	0	-0.00646	0	-0.00392	0	-0.00153	0
337	0.0237056	0.0166416	0.0530452	0.0418841	0.287846	0.287294	1.10956	1.13646	0.696949	0.687273	0.0262326	0.0200915	0.100984	0.0933759		337	0.502453	0.50708	0.0856517	0.0901448	0.00771132	0.00919404	0.00617334	0.00727039	0.0349422	0.0393704	0.00510495	0.00795696	0.236464	0.243736		337	-0.00095	0	-0.01124	0	-0.00263	0	-0.00642	0	-0.00673	0	-0.00451	0	-0.0022	0
337.2	0.0241921	0.0166755	0.0531718	0.0419682	0.288096	0.287796	1.11037	1.1369	0.697778	0.688132	0.0260963	0.0201322	0.100939	0.093557		337.2	0.50199	0.50708	0.0849537	0.0901574	0.00669414	0.00919692	0.00563946	0.00727288	0.0340738	0.0393806	0.0046905	0.00795962	0.235112	0.243741		337.2	-0.00052	0	-0.01091	0	-0.00263	0	-0.00606	0	-0.00667	0	-0.00402	0	-0.00222	0
337.4	0.0248093	0.0167094	0.053298	0.0420522	0.289001	0.288297	1.11131	1.13734	0.699026	0.68899	0.026521	0.020173	0.101144	0.0937381		337.4	0.501126	0.50708	0.084061	0.0901699	0.00586672	0.00919979	0.00454922	0.00727535	0.0331109	0.0393907	0.00399711	0.00796227	0.233956	0.243745		337.4	-6.9e-05	0	-0.01104	0	-0.00288	0	-0.00605	0	-0.00648	0	-0.00336	0	-0.00208	0
337.6	0.025312	0.0167433	0.0535364	0.0421363	0.289474	0.288799	1.11187	1.13777	0.699956	0.689846	0.0266355	0.0202138	0.100517	0.0939191		337.6	0.500446	0.50708	0.0833936	0.0901824	0.00529434	0.00920264	0.00355473	0.00727781	0.0320284	0.0394007	0.00366877	0.0079649	0.232997	0.24375		337.6	-5.4e-05	0	-0.01192	0	-0.00365	0	-0.00652	0	-0.0073	0	-0.00379	0	-0.00296	0
337.8	0.0250209	0.0167772	0.0536317	0.0422203	0.289547	0.289299	1.11192	1.13821	0.700195	0.6907	0.026233	0.0202546	0.0998852	0.0941001		337.8	0.500075	0.50708	0.0833323	0.0901947	0.00497497	0.00920548	0.00363606	0.00728025	0.0318143	0.0394106	0.00360741	0.00796752	0.232454	0.243754		337.8	-4.6e-05	0	-0.0112	0	-0.00319	0	-0.00625	0	-0.00727	0	-0.00349	0	-0.00274	0
338	0.0255082	0.0168111	0.0538921	0.0423043	0.28997	0.2898	1.11251	1.13864	0.701681	0.691553	0.0265529	0.0202953	0.100182	0.094281		338	0.500485	0.50708	0.083201	0.0902069	0.0047776	0.00920829	0.00358868	0.00728268	0.0315826	0.0394205	0.00354179	0.00797012	0.232071	0.243759		338	-0.00024	0	-0.01127	0	-0.00314	0	-0.00688	0	-0.00748	0	-0.00383	0	-0.0031	0
338.2	0.025397	0.016845	0.0538259	0.0423884	0.290574	0.2903	1.11318	1.13907	0.702391	0.692404	0.0262	0.0203361	0.100193	0.0944619		338.2	0.500657	0.50708	0.0832179	0.090219	0.00511132	0.00921109	0.00364752	0.0072851	0.0314843	0.0394303	0.00351186	0.0079727	0.232275	0.243763		338.2	0.000174	0	-0.01085	0	-0.00286	0	-0.00711	0	-0.00709	0	-0.00363	0	-0.00287	0
338.4	0.024867	0.0168789	0.0539307	0.0424724	0.290419	0.2908	1.11314	1.13949	0.702985	0.693253	0.0254665	0.0203769	0.0994242	0.0946427		338.4	0.500871	0.50708	0.0837556	0.090231	0.00511102	0.00921387	0.00382025	0.0072875	0.0312225	0.0394401	0.00363553	0.00797527	0.232146	0.243768		338.4	-1.1e-05	0	-0.01064	0	-0.00323	0	-0.00709	0	-0.00703	0	-0.00354	0	-0.00277	0
338.6	0.0248799	0.0169128	0.0543853	0.0425564	0.291366	0.291299	1.11407	1.13992	0.703534	0.694101	0.0250806	0.0204176	0.0996055	0.0948235		338.6	0.502016	0.50708	0.0845398	0.0902429	0.00552508	0.00921663	0.00441623	0.00728988	0.0319928	0.0394498	0.00429002	0.00797783	0.233181	0.243772		338.6	4.99e-05	0	-0.0099	0	-0.00289	0	-0.00659	0	-0.00714	0	-0.00296	0	-0.00228	0
338.8	0.0255963	0.0169467	0.0547406	0.0426404	0.292111	0.291799	1.11473	1.14034	0.704648	0.694947	0.0255312	0.0204584	0.100366	0.0950043		338.8	0.502267	0.50708	0.0845565	0.0902547	0.00568409	0.00921938	0.00386184	0.00729225	0.0323605	0.0394594	0.00388957	0.00798036	0.233551	0.243776		338.8	-0.00023	0	-0.00985	0	-0.00273	0	-0.00697	0	-0.00737	0	-0.00291	0	-0.00215	0
339	0.0255756	0.0169806	0.0546903	0.0427243	0.292654	0.292297	1.1155	1.14076	0.70541	0.695792	0.0253713	0.0204992	0.10077	0.095185		339	0.502631	0.50708	0.0849374	0.0902664	0.00614887	0.0092221	0.00386114	0.00729461	0.0334171	0.0394689	0.00435304	0.00798289	0.233889	0.24378		339	-3.3e-05	0	-0.00971	0	-0.00231	0	-0.00642	0	-0.00736	0	-0.00183	0	-0.00183	0
339.2	0.0251483	0.0170145	0.0545185	0.0428083	0.293177	0.292796	1.11568	1.14117	0.705823	0.696635	0.0248115	0.0205399	0.100575	0.0953656		339.2	0.503096	0.50708	0.0857399	0.090278	0.00665356	0.00922482	0.00373885	0.00729695	0.0338224	0.0394784	0.00426075	0.00798539	0.234269	0.243785		339.2	-0.00029	0	-0.00969	0	-0.00265	0	-0.00628	0	-0.00797	0	-0.00208	0	-0.00206	0
339.4	0.0251032	0.0170484	0.0542368	0.0428923	0.293581	0.293294	1.11596	1.14159	0.70656	0.697476	0.0249708	0.0205807	0.10048	0.0955463		339.4	0.502801	0.50708	0.0862759	0.0902895	0.00710352	0.00922751	0.00390972	0.00729928	0.0342093	0.0394878	0.00418733	0.00798789	0.234548	0.243789		339.4	-0.0007	0	-0.00989	0	-0.00297	0	-0.00664	0	-0.00856	0	-0.00238	0	-0.00226	0
339.6	0.0250115	0.0170823	0.0542402	0.0429762	0.293877	0.293792	1.11629	1.142	0.707489	0.698316	0.0257333	0.0206214	0.100902	0.0957269		339.6	0.503125	0.50708	0.0865733	0.090301	0.00742317	0.00923019	0.00391059	0.00730159	0.034903	0.0394972	0.00409633	0.00799036	0.234554	0.243793		339.6	-0.00135	0	-0.01003	0	-0.00304	0	-0.00664	0	-0.00863	0	-0.00278	0	-0.00276	0
339.8	0.0251345	0.0171162	0.0537668	0.0430602	0.294351	0.294289	1.11672	1.14241	0.707958	0.699154	0.0257978	0.0206622	0.101127	0.0959074		339.8	0.502806	0.50708	0.0863691	0.0903123	0.00746727	0.00923285	0.00373578	0.00730389	0.0350248	0.0395065	0.00391349	0.00799282	0.234162	0.243797		339.8	-0.00203	0	-0.01011	0	-0.00327	0	-0.00748	0	-0.00907	0	-0.00329	0	-0.00305	0
340	0.024805	0.0171501	0.0533073	0.0431441	0.294349	0.294787	1.11669	1.14282	0.708279	0.699991	0.0252761	0.0207029	0.101256	0.0960879		340	0.502953	0.50708	0.0867555	0.0903235	0.00806871	0.00923549	0.00386503	0.00730618	0.0355361	0.0395157	0.00441557	0.00799527	0.234954	0.243801		340	-0.00254	0	-0.01091	0	-0.00293	0	-0.00776	0	-0.00947	0	-0.00342	0	-0.00289	0
340.2	0.0250736	0.0171839	0.0539439	0.043228	0.294813	0.295283	1.11724	1.14322	0.708721	0.700826	0.0255191	0.0207437	0.101587	0.0962683		340.2	0.503349	0.50708	0.08716	0.0903346	0.00856765	0.00923812	0.00380578	0.00730845	0.0356578	0.0395249	0.00436318	0.0079977	0.235112	0.243804		340.2	-0.00263	0	-0.01078	0	-0.00314	0	-0.00769	0	-0.00897	0	-0.00334	0	-0.00273	0
340.4	0.0251355	0.0172178	0.0538122	0.0433119	0.294991	0.29578	1.11781	1.14363	0.709758	0.701659	0.0258717	0.0207844	0.102608	0.0964487		340.4	0.503404	0.50708	0.0871887	0.0903457	0.00901017	0.00924073	0.00418433	0.00731071	0.0355694	0.039534	0.00414547	0.00800012	0.235265	0.243808		340.4	-0.0029	0	-0.01091	0	-0.00291	0	-0.00721	0	-0.00838	0	-0.00316	0	-0.0028	0
340.6	0.0253567	0.0172517	0.0540325	0.0433958	0.295439	0.296276	1.11796	1.14403	0.710982	0.702491	0.0259041	0.0208251	0.103252	0.096629		340.6	0.503877	0.50708	0.0868833	0.0903566	0.00967485	0.00924333	0.00485152	0.00731295	0.0361408	0.0395431	0.00449764	0.00800252	0.235432	0.243812		340.6	-0.00241	0	-0.0113	0	-0.00302	0	-0.00677	0	-0.00818	0	-0.00286	0	-0.00326	0
340.8	0.0260205	0.0172856	0.0542566	0.0434797	0.296503	0.296772	1.11883	1.14443	0.712232	0.703321	0.0264541	0.0208659	0.103809	0.0968093		340.8	0.503914	0.50708	0.0867582	0.0903675	0.00935253	0.0092459	0.00519931	0.00731519	0.0362186	0.039552	0.00432347	0.00800491	0.235156	0.243816		340.8	-0.00228	0	-0.01137	0	-0.003	0	-0.00721	0	-0.00833	0	-0.00212	0	-0.00309	0
341	0.0255111	0.0173195	0.0547566	0.0435636	0.297088	0.297268	1.11923	1.14482	0.713292	0.70415	0.0272265	0.0209066	0.104002	0.0969896		341	0.504016	0.50708	0.0861567	0.0903782	0.00905147	0.00924847	0.00523608	0.0073174	0.0355165	0.039561	0.00401733	0.00800729	0.234637	0.243819		341	-0.00279	0	-0.01193	0	-0.00379	0	-0.00777	0	-0.00825	0	-0.0024	0	-0.00383	0
341.2	0.0255058	0.0173533	0.055113	0.0436475	0.297171	0.297763	1.11944	1.14522	0.713968	0.704977	0.0274192	0.0209473	0.103867	0.0971698		341.2	0.504027	0.50708	0.08668	0.0903889	0.00896141	0.00925101	0.00538791	0.00731961	0.0351123	0.0395698	0.00403506	0.00800965	0.23451	0.243823		341.2	-0.00245	0	-0.01117	0	-0.00377	0	-0.007	0	-0.0077	0	-0.00196	0	-0.00307	0
341.4	0.0252863	0.0173872	0.0556073	0.0437314	0.298136	0.298258	1.11965	1.14561	0.715327	0.705802	0.0279959	0.0209881	0.104454	0.09735		341.4	0.504094	0.50708	0.086706	0.0903994	0.009141	0.00925354	0.00534672	0.0073218	0.0348779	0.0395786	0.00425539	0.00801199	0.234811	0.243827		341.4	-0.00217	0	-0.01128	0	-0.00419	0	-0.00686	0	-0.0073	0	-0.00185	0	-0.00314	0
341.6	0.0247549	0.0174211	0.0556898	0.0438152	0.298109	0.298752	1.11975	1.146	0.715942	0.706626	0.0277345	0.0210288	0.10437	0.0975301		341.6	0.504338	0.50708	0.0869606	0.0904099	0.00906911	0.00925606	0.00618244	0.00732398	0.0348423	0.0395874	0.00471381	0.00801432	0.235111	0.24383		341.6	-0.0021	0	-0.01155	0	-0.00504	0	-0.007	0	-0.00802	0	-0.00274	0	-0.00354	0
341.8	0.0241081	0.0174549	0.055285	0.0438991	0.298196	0.299246	1.11958	1.14638	0.716424	0.707448	0.0270972	0.0210695	0.104417	0.0977102		341.8	0.504598	0.50708	0.08703	0.0904203	0.00922446	0.00925856	0.00637541	0.00732614	0.0348828	0.0395961	0.00495518	0.00801664	0.235722	0.243834		341.8	-0.00181	0	-0.01074	0	-0.0045	0	-0.00652	0	-0.0074	0	-0.00233	0	-0.00271	0
342	0.024446	0.0174888	0.0552191	0.0439829	0.298546	0.29974	1.11977	1.14677	0.717177	0.708269	0.026817	0.0211102	0.104579	0.0978902		342	0.505068	0.50708	0.0868342	0.0904306	0.00959901	0.00926104	0.0065611	0.0073283	0.0349799	0.0396047	0.00515886	0.00801894	0.236459	0.243837		342	-0.00179	0	-0.01102	0	-0.00453	0	-0.00676	0	-0.00718	0	-0.00222	0	-0.00229	0
342.2	0.0247108	0.0175227	0.0553916	0.0440668	0.299123	0.300234	1.12039	1.14715	0.717575	0.709088	0.0270316	0.021151	0.104647	0.0980702		342.2	0.504466	0.50708	0.0864724	0.0904409	0.00914007	0.00926351	0.00636571	0.00733044	0.0345765	0.0396133	0.00548327	0.00802123	0.236577	0.24384		342.2	-0.00136	0	-0.01012	0	-0.00446	0	-0.00662	0	-0.007	0	-0.002	0	-0.00189	0
342.4	0.0250552	0.0175565	0.0556199	0.0441506	0.299726	0.300727	1.12099	1.14753	0.718531	0.709905	0.0275093	0.0211917	0.104723	0.0982502		342.4	0.504796	0.50708	0.0862273	0.090451	0.00880225	0.00926596	0.00672403	0.00733256	0.0346394	0.0396218	0.00542272	0.0080235	0.237142	0.243844		342.4	-0.00096	0	-0.0092	0	-0.00417	0	-0.00634	0	-0.00694	0	-0.00152	0	-0.00133	0
342.6	0.0257505	0.0175904	0.056383	0.0442344	0.300764	0.30122	1.12168	1.14791	0.719122	0.710721	0.0278618	0.0212324	0.10545	0.0984301		342.6	0.504561	0.50708	0.0857007	0.090461	0.00837048	0.0092684	0.00631069	0.00733468	0.0345813	0.0396302	0.00547294	0.00802576	0.237728	0.243847		342.6	-0.00049	0	-0.00875	0	-0.00368	0	-0.00617	0	-0.0066	0	-0.00104	0	-0.00094	0
342.8	0.0260034	0.0176243	0.0568205	0.0443182	0.301603	0.301713	1.12221	1.14829	0.720232	0.711536	0.0284112	0.0212731	0.105905	0.0986099		342.8	0.504195	0.50708	0.0850157	0.090471	0.00821482	0.00927082	0.00586797	0.00733678	0.0341345	0.0396386	0.00528677	0.00802801	0.237474	0.24385		342.8	-0.00114	0	-0.00938	0	-0.00378	0	-0.00664	0	-0.0072	0	-0.00133	0	-0.00095	0
343	0.0262527	0.0176581	0.0567997	0.044402	0.302576	0.302205	1.12253	1.14866	0.721108	0.712349	0.0285274	0.0213138	0.106193	0.0987897		343	0.504049	0.50708	0.0844022	0.0904809	0.00767082	0.00927323	0.00584765	0.00733887	0.034087	0.0396469	0.0053054	0.00803025	0.237715	0.243853		343	-0.001	0	-0.00897	0	-0.00387	0	-0.00633	0	-0.00714	0	-0.00104	0	-0.00056	0
343.2	0.026415	0.017692	0.0568996	0.0444858	0.30323	0.302697	1.12282	1.14904	0.721297	0.71316	0.0287185	0.0213545	0.105814	0.0989695		343.2	0.504066	0.50708	0.0845875	0.0904907	0.00785044	0.00927562	0.00597955	0.00734094	0.0341863	0.0396552	0.0049336	0.00803247	0.238265	0.243857		343.2	-0.00095	0	-0.009	0	-0.00404	0	-0.00632	0	-0.00764	0	-0.002	0	-0.0009	0
343.4	0.0267937	0.0177258	0.0572595	0.0445695	0.303684	0.303188	1.12322	1.14941	0.722491	0.71397	0.0289578	0.0213952	0.105956	0.0991492		343.4	0.503922	0.50708	0.0839217	0.0905004	0.00775385	0.00927799	0.00599164	0.00734301	0.034159	0.0396634	0.00507862	0.00803467	0.238529	0.24386		343.4	-0.00175	0	-0.00952	0	-0.00449	0	-0.00672	0	-0.00834	0	-0.00283	0	-0.00153	0
343.6	0.0268122	0.0177597	0.0574284	0.0446533	0.303971	0.30368	1.12342	1.14977	0.723127	0.714778	0.0289938	0.0214359	0.106279	0.0993289		343.6	0.503795	0.50708	0.0832583	0.09051	0.00736212	0.00928036	0.00598214	0.00734506	0.0343652	0.0396716	0.00489236	0.00803687	0.238301	0.243863		343.6	-0.00175	0	-0.00937	0	-0.00452	0	-0.00655	0	-0.00848	0	-0.00303	0	-0.00166	0
343.8	0.0270103	0.0177935	0.0570287	0.0447371	0.304183	0.304171	1.12368	1.15014	0.723917	0.715585	0.0282971	0.0214766	0.105962	0.0995085		343.8	0.503462	0.50708	0.0832623	0.0905196	0.00742159	0.0092827	0.00631066	0.0073471	0.0343479	0.0396797	0.00523948	0.00803905	0.238696	0.243866		343.8	-0.00136	0	-0.00955	0	-0.00421	0	-0.00638	0	-0.00852	0	-0.00318	0	-0.00177	0
344	0.026933	0.0178274	0.057323	0.0448208	0.304292	0.304661	1.1238	1.1505	0.724269	0.71639	0.0277915	0.0215173	0.106267	0.0996881		344	0.50412	0.50708	0.083192	0.090529	0.00774387	0.00928504	0.00663461	0.00734913	0.0341738	0.0396878	0.00552035	0.00804121	0.239208	0.243869		344	-0.00062	0	-0.00925	0	-0.00354	0	-0.00589	0	-0.00788	0	-0.00294	0	-0.00131	0
344.2	0.0269001	0.0178612	0.0578281	0.0449046	0.304564	0.305152	1.12458	1.15087	0.724724	0.717194	0.0274689	0.021558	0.106457	0.0998677		344.2	0.503949	0.50708	0.0827432	0.0905384	0.00725193	0.00928735	0.00653219	0.00735114	0.0340874	0.0396958	0.00492649	0.00804337	0.238895	0.243872		344.2	-0.00027	0	-0.00899	0	-0.0037	0	-0.00601	0	-0.00759	0	-0.00282	0	-0.00136	0
344.4	0.0267407	0.0178951	0.0577342	0.0449883	0.305004	0.305641	1.12491	1.15123	0.725873	0.717996	0.0270972	0.0215987	0.106949	0.100047		344.4	0.504355	0.50708	0.0829074	0.0905477	0.00731401	0.00928966	0.00687913	0.00735314	0.0347095	0.0397037	0.00489332	0.00804551	0.238938	0.243875		344.4	-0.00028	0	-0.00965	0	-0.00386	0	-0.00643	0	-0.00804	0	-0.00358	0	-0.00235	0
344.6	0.0269232	0.0179289	0.0577602	0.045072	0.305887	0.306131	1.1254	1.15158	0.727003	0.718796	0.0269676	0.0216394	0.10677	0.100227		344.6	0.504663	0.50708	0.0833018	0.090557	0.00744295	0.00929195	0.00766187	0.00735513	0.0353683	0.0397116	0.00521183	0.00804763	0.238658	0.243878		344.6	-6.9e-05	0	-0.00952	0	-0.00391	0	-0.00656	0	-0.00789	0	-0.00352	0	-0.00274	0
344.8	0.026855	0.0179628	0.0577479	0.0451557	0.306321	0.30662	1.12618	1.15194	0.728303	0.719595	0.0270222	0.02168	0.107276	0.100406		344.8	0.504971	0.50708	0.083807	0.0905661	0.00725852	0.00929422	0.00788731	0.00735711	0.0353629	0.0397194	0.00529352	0.00804975	0.238513	0.24388		344.8	-0.00057	0	-0.00973	0	-0.00408	0	-0.00716	0	-0.00818	0	-0.00426	0	-0.00329	0
345	0.0265044	0.0179966	0.057692	0.0452394	0.306708	0.307109	1.1266	1.15229	0.729123	0.720393	0.027331	0.0217207	0.10721	0.100585		345	0.505401	0.50708	0.0840535	0.0905752	0.00749593	0.00929648	0.00777431	0.00735908	0.0349776	0.0397272	0.00530794	0.00805185	0.237708	0.243883		345	-0.00079	0	-0.00985	0	-0.00452	0	-0.00753	0	-0.0081	0	-0.00481	0	-0.00408	0
345.2	0.0264027	0.0180305	0.0579003	0.0453231	0.307268	0.307598	1.12753	1.15264	0.730168	0.721189	0.0272052	0.0217614	0.107738	0.100765		345.2	0.505296	0.50708	0.0844749	0.0905842	0.00758263	0.00929873	0.00756229	0.00736103	0.034932	0.039735	0.0052463	0.00805394	0.237433	0.243886		345.2	-0.00058	0	-0.0101	0	-0.00514	0	-0.00763	0	-0.00841	0	-0.00534	0	-0.00403	0
345.4	0.0256424	0.0180643	0.0575715	0.0454068	0.308129	0.308086	1.12805	1.15299	0.731156	0.721983	0.027371	0.0218021	0.107918	0.100944		345.4	0.5054	0.50708	0.0850324	0.0905931	0.00744863	0.00930096	0.00760265	0.00736298	0.035269	0.0397426	0.00565413	0.00805602	0.237545	0.243889		345.4	-0.00023	0	-0.0103	0	-0.0054	0	-0.00783	0	-0.009	0	-0.00539	0	-0.00452	0
345.6	0.0249132	0.0180981	0.0570421	0.0454905	0.307997	0.308574	1.12842	1.15334	0.731036	0.722776	0.0270465	0.0218427	0.10791	0.101123		345.6	0.504833	0.50708	0.0852684	0.090602	0.00720625	0.00930318	0.00741007	0.00736491	0.035369	0.0397503	0.00593045	0.00805808	0.237305	0.243891		345.6	-0.00039	0	-0.01046	0	-0.0059	0	-0.00842	0	-0.0099	0	-0.00597	0	-0.00484	0
345.8	0.0253849	0.018132	0.0571603	0.0455742	0.308462	0.309062	1.12863	1.15369	0.73161	0.723568	0.0273058	0.0218834	0.107939	0.101302		345.8	0.504738	0.50708	0.0857041	0.0906108	0.00757435	0.00930538	0.00746315	0.00736683	0.035889	0.0397578	0.00626535	0.00806013	0.237231	0.243894		345.8	-0.00063	0	-0.01068	0	-0.00591	0	-0.00874	0	-0.01031	0	-0.0061	0	-0.00486	0
346	0.0258419	0.0181658	0.0578915	0.0456578	0.309482	0.30955	1.1294	1.15403	0.732579	0.724357	0.0280018	0.0219241	0.108268	0.101482		346	0.504938	0.50708	0.0858528	0.0906195	0.00759928	0.00930757	0.00710588	0.00736874	0.0360371	0.0397654	0.00637394	0.00806217	0.237491	0.243897		346	-0.00096	0	-0.0106	0	-0.00635	0	-0.00944	0	-0.01017	0	-0.00589	0	-0.00477	0
346.2	0.0264561	0.0181997	0.0583512	0.0457415	0.310303	0.310037	1.13042	1.15437	0.733672	0.725146	0.0287366	0.0219647	0.108557	0.101661		346.2	0.504114	0.50708	0.0861254	0.0906281	0.00693025	0.00930975	0.00665736	0.00737063	0.0354243	0.0397728	0.00617904	0.0080642	0.236985	0.243899		346.2	-0.00078	0	-0.01025	0	-0.00638	0	-0.00977	0	-0.01024	0	-0.00584	0	-0.00475	0
346.4	0.0266338	0.0182335	0.0587926	0.0458251	0.310923	0.310523	1.13098	1.15471	0.73435	0.725933	0.0286976	0.0220054	0.108769	0.10184		346.4	0.503775	0.50708	0.0858526	0.0906366	0.00695744	0.00931192	0.00644109	0.00737252	0.0352185	0.0397803	0.00562602	0.00806621	0.237261	0.243902		346.4	-0.00066	0	-0.00967	0	-0.00556	0	-0.00974	0	-0.01014	0	-0.00541	0	-0.0038	0
346.6	0.026757	0.0182673	0.0595536	0.0459087	0.31132	0.31101	1.13112	1.15505	0.734556	0.726718	0.0290318	0.0220461	0.108939	0.102019		346.6	0.503174	0.50708	0.0855941	0.0906451	0.00673745	0.00931407	0.00568454	0.00737439	0.035016	0.0397876	0.00542814	0.00806821	0.237306	0.243904		346.6	-0.0014	0	-0.00975	0	-0.00552	0	-0.00987	0	-0.01009	0	-0.0051	0	-0.00359	0
346.8	0.0273331	0.0183011	0.0595562	0.0459923	0.312395	0.311496	1.1318	1.15539	0.735891	0.727502	0.0297432	0.0220867	0.109779	0.102198		346.8	0.502648	0.50708	0.0853294	0.0906535	0.0067149	0.0093162	0.00534911	0.00737626	0.0350331	0.039795	0.00523308	0.0080702	0.237287	0.243907		346.8	-0.00143	0	-0.01016	0	-0.0052	0	-0.00975	0	-0.0099	0	-0.00499	0	-0.00259	0
347	0.027596	0.018335	0.0598973	0.0460759	0.313245	0.311982	1.13212	1.15572	0.736533	0.728284	0.0302533	0.0221274	0.109766	0.102377		347	0.502034	0.50708	0.0847739	0.0906619	0.00631802	0.00931832	0.00487039	0.00737811	0.0349523	0.0398022	0.00485545	0.00807218	0.236961	0.243909		347	-0.00145	0	-0.01002	0	-0.00549	0	-0.00969	0	-0.00962	0	-0.00495	0	-0.00214	0
347.2	0.0277265	0.0183688	0.0602504	0.0461595	0.313485	0.312467	1.13271	1.15606	0.737424	0.729065	0.0306462	0.022168	0.11035	0.102555		347.2	0.501862	0.50708	0.0849832	0.0906701	0.00676896	0.00932043	0.00507347	0.00737995	0.0350687	0.0398095	0.00516994	0.00807415	0.237092	0.243912		347.2	-0.00174	0	-0.01054	0	-0.00558	0	-0.00903	0	-0.0095	0	-0.00509	0	-0.00231	0
347.4	0.0274016	0.0184026	0.0598346	0.0462431	0.313596	0.312952	1.1326	1.15639	0.738333	0.729845	0.0301997	0.0222087	0.110612	0.102734		347.4	0.501227	0.50708	0.0842109	0.0906783	0.00642156	0.00932253	0.00454903	0.00738178	0.0350078	0.0398166	0.00493815	0.0080761	0.236895	0.243914		347.4	-0.00192	0	-0.01044	0	-0.00518	0	-0.00875	0	-0.00902	0	-0.00477	0	-0.00206	0
347.6	0.0272167	0.0184364	0.0595414	0.0463267	0.313778	0.313437	1.13265	1.15672	0.738756	0.730623	0.0299271	0.0222493	0.110686	0.102913		347.6	0.500885	0.50708	0.0838827	0.0906865	0.00648577	0.00932462	0.00435956	0.0073836	0.0351088	0.0398237	0.00473069	0.00807804	0.236392	0.243916		347.6	-0.00127	0	-0.01025	0	-0.00497	0	-0.00835	0	-0.00869	0	-0.00447	0	-0.00145	0
347.8	0.0263151	0.0184703	0.0587705	0.0464103	0.313615	0.313921	1.13212	1.15704	0.738878	0.731399	0.0288854	0.02229	0.110443	0.103092		347.8	0.500827	0.50708	0.0836692	0.0906945	0.00665583	0.00932669	0.00425969	0.00738541	0.0348574	0.0398308	0.0049433	0.00807997	0.236416	0.243919		347.8	-0.00028	0	-0.0098	0	-0.00412	0	-0.00745	0	-0.008	0	-0.00395	0	-0.00091	0
348	0.0253108	0.0185041	0.0583673	0.0464939	0.312732	0.314405	1.13123	1.15737	0.738256	0.732174	0.027856	0.0223306	0.109912	0.10327		348	0.501165	0.50708	0.0832828	0.0907025	0.00687941	0.00932874	0.00436669	0.0073872	0.0345854	0.0398379	0.00497441	0.00808189	0.236696	0.243921		348	-2.6e-05	0	-0.00928	0	-0.00381	0	-0.0071	0	-0.00762	0	-0.00337	0	-0.00046	0
348.2	0.0250295	0.0185379	0.0577458	0.0465774	0.312223	0.314889	1.13113	1.15769	0.738812	0.732947	0.0274236	0.0223712	0.109489	0.103449		348.2	0.500444	0.50708	0.0830449	0.0907104	0.00693969	0.00933079	0.00427249	0.00738899	0.0346083	0.0398448	0.00435157	0.0080838	0.23678	0.243923		348.2	-0.0004	0	-0.0097	0	-0.00442	0	-0.00715	0	-0.008	0	-0.00359	0	-0.00115	0
348.4	0.0250738	0.0185717	0.0575937	0.0466609	0.312646	0.315373	1.13117	1.15801	0.739903	0.733719	0.0276003	0.0224119	0.109375	0.103628		348.4	0.501184	0.50708	0.0836167	0.0907183	0.00757778	0.00933282	0.00473175	0.00739076	0.0352633	0.0398518	0.00456777	0.00808569	0.237057	0.243926		348.4	-0.00055	0	-0.0101	0	-0.0039	0	-0.00694	0	-0.00847	0	-0.00398	0	-0.00144	0
348.6	0.0252798	0.0186055	0.0574122	0.0467445	0.313057	0.315856	1.13138	1.15833	0.741019	0.73449	0.0276572	0.0224525	0.109522	0.103806		348.6	0.501504	0.50708	0.08401	0.0907261	0.00796337	0.00933484	0.00537231	0.00739253	0.0353043	0.0398586	0.00512093	0.00808758	0.236738	0.243928		348.6	-0.0003	0	-0.00998	0	-0.00354	0	-0.00642	0	-0.00794	0	-0.00345	0	-0.00131	0
348.8	0.0251342	0.0186393	0.0572961	0.046828	0.312864	0.316339	1.13131	1.15865	0.741718	0.735259	0.0277836	0.0224931	0.109988	0.103985		348.8	0.501684	0.50708	0.0838338	0.0907338	0.00815288	0.00933685	0.0051577	0.00739428	0.0346097	0.0398655	0.00543358	0.00808945	0.236523	0.24393		348.8	-0.00078	0	-0.01091	0	-0.00389	0	-0.00695	0	-0.00821	0	-0.00397	0	-0.00176	0
349	0.025395	0.0186731	0.0570637	0.0469115	0.313156	0.316821	1.13124	1.15897	0.742463	0.736027	0.0275694	0.0225338	0.109672	0.104163		349	0.501632	0.50708	0.0836931	0.0907415	0.00804634	0.00933884	0.00507457	0.00739603	0.0341012	0.0398723	0.00547014	0.00809131	0.235669	0.243932		349	-0.00114	0	-0.01124	0	-0.00449	0	-0.00782	0	-0.00841	0	-0.00438	0	-0.00205	0
349.2	0.0247237	0.0187069	0.0567037	0.046995	0.313401	0.317304	1.13128	1.15928	0.743127	0.736793	0.027211	0.0225744	0.10934	0.104342		349.2	0.502096	0.50708	0.0841356	0.090749	0.00844057	0.00934082	0.00545715	0.00739776	0.034397	0.039879	0.00612967	0.00809316	0.236174	0.243934		349.2	-0.00103	0	-0.01145	0	-0.00468	0	-0.00784	0	-0.0087	0	-0.00462	0	-0.00209	0
349.4	0.024385	0.0187408	0.0564703	0.0470785	0.313659	0.317785	1.13124	1.15959	0.743706	0.737557	0.0273052	0.022615	0.109322	0.10452		349.4	0.502671	0.50708	0.0849915	0.0907566	0.00875039	0.00934279	0.00642125	0.00739948	0.0344951	0.0398857	0.00665398	0.008095	0.236641	0.243936		349.4	-0.00077	0	-0.01069	0	-0.0043	0	-0.00744	0	-0.00903	0	-0.00414	0	-0.00226	0
349.6	0.0248808	0.0187746	0.0569956	0.047162	0.314138	0.318267	1.13144	1.1599	0.744766	0.73832	0.0276308	0.0226556	0.109937	0.104698		349.6	0.502689	0.50708	0.085392	0.090764	0.00866498	0.00934475	0.00704599	0.00740119	0.0344434	0.0398924	0.00676742	0.00809683	0.236344	0.243938		349.6	-0.00091	0	-0.01063	0	-0.00436	0	-0.00795	0	-0.00935	0	-0.0043	0	-0.00202	0
349.8	0.0260886	0.0188084	0.0580443	0.0472455	0.315344	0.318748	1.13183	1.16021	0.745902	0.739082	0.0275807	0.0226963	0.109977	0.104877		349.8	0.503636	0.50708	0.0859928	0.0907715	0.00914645	0.00934669	0.00752647	0.0074029	0.034973	0.039899	0.00742271	0.00809864	0.236584	0.24394		349.8	-0.00075	0	-0.01069	0	-0.00418	0	-0.00834	0	-0.00956	0	-0.0042	0	-0.00189	0
350	0.0259786	0.0188422	0.0582524	0.047329	0.316191	0.319229	1.13232	1.16052	0.746862	0.739842	0.027343	0.0227369	0.109926	0.105055		350	0.503802	0.50708	0.0861147	0.0907788	0.00914698	0.00934863	0.00693119	0.00740459	0.0343606	0.0399055	0.00679463	0.00810045	0.236709	0.243942		350	-0.00072	0	-0.01038	0	-0.0042	0	-0.00854	0	-0.00931	0	-0.004	0	-0.00129	0
350.2	0.0261881	0.018876	0.0583902	0.0474125	0.316514	0.31971	1.13278	1.16082	0.74791	0.740601	0.0272435	0.0227775	0.109913	0.105233		350.2	0.504435	0.50708	0.0864033	0.0907861	0.00896297	0.00935055	0.00744702	0.00740627	0.0341617	0.0399121	0.00719493	0.00810224	0.2372	0.243944		350.2	-0.00079	0	-0.00973	0	-0.0039	0	-0.00835	0	-0.00937	0	-0.00366	0	-0.00109	0
350.4	0.0267305	0.0189098	0.0592944	0.0474959	0.317479	0.32019	1.13351	1.16113	0.748822	0.741359	0.0271777	0.0228181	0.110321	0.105411		350.4	0.505009	0.50708	0.0860731	0.0907933	0.00920316	0.00935246	0.00783577	0.00740794	0.0345879	0.0399185	0.00733873	0.00810403	0.23806	0.243946		350.4	-0.00085	0	-0.00921	0	-0.00338	0	-0.00798	0	-0.00905	0	-0.00345	0	-0.00053	0
350.6	0.02699	0.0189435	0.0594139	0.0475793	0.317959	0.32067	1.13389	1.16143	0.749647	0.742115	0.0276886	0.0228587	0.110301	0.105589		350.6	0.505493	0.50708	0.0862769	0.0908005	0.00888677	0.00935435	0.00775308	0.0074096	0.0349183	0.039925	0.00740949	0.0081058	0.2383	0.243948		350.6	-0.00112	0	-0.00898	0	-0.00372	0	-0.00789	0	-0.00882	0	-0.00356	0	-0.00052	0
350.8	0.0276048	0.0189774	0.0593874	0.0476628	0.31879	0.32115	1.13491	1.16173	0.750821	0.742869	0.0284789	0.0228993	0.110703	0.105768		350.8	0.505854	0.50708	0.0865814	0.0908076	0.00877524	0.00935624	0.00780814	0.00741125	0.0348094	0.0399314	0.00759678	0.00810756	0.237868	0.24395		350.8	-0.00068	0	-0.00915	0	-0.00352	0	-0.00756	0	-0.00836	0	-0.00372	0	-0.00024	0
351	0.0271276	0.0190111	0.0596545	0.0477462	0.31977	0.321629	1.135	1.16203	0.751464	0.743622	0.0287311	0.0229399	0.11034	0.105946		351	0.506115	0.50708	0.0868695	0.0908146	0.00877949	0.00935811	0.00780647	0.0074129	0.0347424	0.0399377	0.00762855	0.00810931	0.23779	0.243952		351	-0.0016	0	-0.00942	0	-0.00444	0	-0.00788	0	-0.00892	0	-0.00427	0	-0.00094	0
351.2	0.0273518	0.0190449	0.0595991	0.0478296	0.32024	0.322108	1.1355	1.16233	0.752323	0.744374	0.0289772	0.0229805	0.110689	0.106124		351.2	0.506651	0.50708	0.0869749	0.0908216	0.00914837	0.00935997	0.00852395	0.00741453	0.0351634	0.039944	0.00771316	0.00811105	0.238359	0.243954		351.2	-0.00118	0	-0.00873	0	-0.0039	0	-0.00715	0	-0.0082	0	-0.00399	0	-0.00054	0
351.4	0.0269642	0.0190787	0.0592424	0.047913	0.320968	0.322587	1.13556	1.16262	0.752693	0.745124	0.0283057	0.0230211	0.110223	0.106301		351.4	0.506792	0.50708	0.0868003	0.0908285	0.00927497	0.00936182	0.00783161	0.00741615	0.0351252	0.0399503	0.00695178	0.00811278	0.238125	0.243956		351.4	-0.00131	0	-0.00878	0	-0.0039	0	-0.00716	0	-0.00807	0	-0.00405	0	-0.00051	0
351.6	0.0265806	0.0191125	0.0592119	0.0479964	0.321585	0.323065	1.13549	1.16291	0.753485	0.745872	0.0282442	0.0230617	0.110298	0.106479		351.6	0.506844	0.50708	0.0865636	0.0908353	0.00915221	0.00936366	0.00787036	0.00741776	0.0351189	0.0399565	0.00653694	0.0081145	0.238196	0.243957		351.6	-0.00137	0	-0.00893	0	-0.00414	0	-0.00705	0	-0.00823	0	-0.0038	0	-0.0009	0
351.8	0.0258688	0.0191463	0.0585981	0.0480798	0.321518	0.323543	1.13504	1.16321	0.753158	0.74662	0.0275168	0.0231023	0.109946	0.106657		351.8	0.506638	0.50708	0.0865151	0.0908421	0.0087256	0.00936549	0.00751587	0.00741937	0.0349904	0.0399627	0.00608539	0.00811621	0.23852	0.243959		351.8	-0.00138	0	-0.0085	0	-0.00384	0	-0.00693	0	-0.00815	0	-0.00356	0	-0.00145	0
352	0.0260447	0.0191801	0.0586032	0.0481632	0.321725	0.324021	1.13552	1.1635	0.753365	0.747366	0.0280311	0.0231429	0.109619	0.106835		352	0.506567	0.50708	0.0861703	0.0908489	0.00833138	0.0093673	0.00702576	0.00742096	0.0350104	0.0399688	0.00557872	0.00811791	0.239042	0.243961		352	-0.00173	0	-0.00841	0	-0.0039	0	-0.007	0	-0.0081	0	-0.00313	0	-0.0014	0
352.2	0.0263647	0.0192139	0.0587932	0.0482466	0.322562	0.324498	1.13632	1.16379	0.754398	0.74811	0.0286595	0.0231835	0.109685	0.107013		352.2	0.505837	0.50708	0.0856574	0.0908556	0.0079979	0.00936911	0.00617979	0.00742254	0.0350205	0.0399749	0.00491107	0.0081196	0.238865	0.243963		352.2	-0.00185	0	-0.00877	0	-0.00417	0	-0.00691	0	-0.00824	0	-0.00343	0	-0.00173	0
352.4	0.0269405	0.0192477	0.0594032	0.0483299	0.32422	0.324975	1.13734	1.16407	0.755614	0.748853	0.0294985	0.0232241	0.110597	0.107191		352.4	0.506195	0.50708	0.0858395	0.0908622	0.00809841	0.0093709	0.00636546	0.00742412	0.0355969	0.0399809	0.00512921	0.00812128	0.238725	0.243964		352.4	-0.00157	0	-0.0089	0	-0.00347	0	-0.00685	0	-0.00843	0	-0.00318	0	-0.00183	0
352.6	0.0264616	0.0192814	0.0589248	0.0484133	0.324134	0.325452	1.13746	1.16436	0.756152	0.749595	0.0293147	0.0232647	0.110821	0.107368		352.6	0.505753	0.50708	0.0853971	0.0908688	0.00788891	0.00937268	0.00583484	0.00742568	0.0351668	0.0399869	0.00540165	0.00812294	0.238151	0.243966		352.6	-0.00227	0	-0.00963	0	-0.00429	0	-0.00767	0	-0.00856	0	-0.00305	0	-0.00209	0
352.8	0.0266673	0.0193152	0.0586603	0.0484966	0.324551	0.325929	1.13782	1.16464	0.756737	0.750335	0.0295233	0.0233052	0.111557	0.107546		352.8	0.505126	0.50708	0.0846715	0.0908753	0.0076443	0.00937445	0.00524209	0.00742724	0.0349596	0.0399929	0.00530408	0.0081246	0.237494	0.243968		352.8	-0.00189	0	-0.00987	0	-0.00385	0	-0.00748	0	-0.00803	0	-0.00264	0	-0.00176	0
353	0.0265171	0.019349	0.0583018	0.0485799	0.325297	0.326405	1.13801	1.16492	0.757209	0.751074	0.0293499	0.0233458	0.111396	0.107723		353	0.504347	0.50708	0.0840853	0.0908818	0.00755971	0.00937621	0.00475623	0.00742878	0.0345695	0.0399988	0.00489606	0.00812625	0.237395	0.243969		353	-0.00176	0	-0.01007	0	-0.00376	0	-0.00754	0	-0.00798	0	-0.00255	0	-0.00178	0
353.2	0.0265505	0.0193828	0.0583923	0.0486633	0.325778	0.326881	1.13903	1.1652	0.757812	0.751811	0.0299145	0.0233864	0.111445	0.107901		353.2	0.503662	0.50708	0.0842083	0.0908882	0.00764589	0.00937796	0.0043581	0.00743032	0.0347074	0.0400047	0.00445522	0.00812789	0.237128	0.243971		353.2	-0.00118	0	-0.00984	0	-0.00305	0	-0.0069	0	-0.00807	0	-0.00166	0	-0.00154	0
353.4	0.0268256	0.0194165	0.0587903	0.0487466	0.326366	0.327356	1.1399	1.16548	0.758705	0.752547	0.0301119	0.0234269	0.112011	0.108078		353.4	0.502968	0.50708	0.0839364	0.0908945	0.00723091	0.00937969	0.00438443	0.00743185	0.0343351	0.0400106	0.00389739	0.00812952	0.236709	0.243972		353.4	-0.00119	0	-0.00991	0	-0.00277	0	-0.00682	0	-0.00818	0	-0.0018	0	-0.00161	0
353.6	0.0266555	0.0194503	0.0589802	0.0488299	0.326965	0.327831	1.1406	1.16576	0.759374	0.753281	0.0303165	0.0234675	0.11225	0.108256		353.6	0.502874	0.50708	0.0838166	0.0909008	0.00684642	0.00938142	0.00394393	0.00743336	0.0344116	0.0400164	0.00380577	0.00813113	0.236516	0.243974		353.6	-0.00107	0	-0.01012	0	-0.0027	0	-0.00723	0	-0.00856	0	-0.00229	0	-0.00168	0
353.8	0.0261526	0.0194841	0.0588173	0.0489132	0.327371	0.328306	1.14091	1.16604	0.759911	0.754015	0.0295412	0.0235081	0.111911	0.108433		353.8	0.503078	0.50708	0.0837579	0.0909071	0.00690925	0.00938314	0.00347644	0.00743487	0.0344624	0.0400221	0.00441585	0.00813274	0.236609	0.243976		353.8	-0.00122	0	-0.01047	0	-0.00311	0	-0.00759	0	-0.0087	0	-0.00262	0	-0.00192	0
354	0.0259415	0.0195178	0.0589256	0.0489965	0.327389	0.328781	1.14137	1.16631	0.761044	0.754746	0.0290707	0.0235487	0.112299	0.108611		354	0.50316	0.50708	0.0837086	0.0909133	0.0065616	0.00938484	0.0034384	0.00743637	0.0342925	0.0400278	0.00398885	0.00813434	0.236654	0.243977		354	-0.00118	0	-0.00984	0	-0.00348	0	-0.00731	0	-0.00842	0	-0.00252	0	-0.00163	0
354.2	0.0261044	0.0195516	0.0591224	0.0490798	0.327528	0.329255	1.14171	1.16658	0.76201	0.755477	0.0292239	0.0235892	0.112669	0.108788		354.2	0.503356	0.50708	0.0838693	0.0909194	0.00591488	0.00938654	0.00362979	0.00743786	0.0341373	0.0400335	0.00449454	0.00813593	0.236557	0.243979		354.2	-0.00156	0	-0.00981	0	-0.00376	0	-0.00747	0	-0.0083	0	-0.00306	0	-0.00203	0
354.4	0.0264348	0.0195854	0.0596088	0.049163	0.327964	0.329729	1.1418	1.16686	0.76283	0.756206	0.0289949	0.0236298	0.113239	0.108965		354.4	0.503064	0.50708	0.0839788	0.0909255	0.00567461	0.00938822	0.0035295	0.00743934	0.0341936	0.0400392	0.00423012	0.00813751	0.23657	0.24398		354.4	-0.00187	0	-0.01025	0	-0.00401	0	-0.00758	0	-0.00835	0	-0.00379	0	-0.00244	0
354.6	0.0264502	0.0196191	0.0598786	0.0492463	0.32786	0.330203	1.14216	1.16712	0.763922	0.756933	0.0290409	0.0236703	0.113509	0.109143		354.6	0.502829	0.50708	0.0843821	0.0909315	0.00519614	0.00938989	0.00353774	0.00744082	0.0339456	0.0400448	0.00412243	0.00813908	0.236267	0.243982		354.6	-0.00147	0	-0.01032	0	-0.0043	0	-0.00749	0	-0.00835	0	-0.00435	0	-0.00257	0
354.8	0.0262944	0.0196529	0.0602097	0.0493295	0.32826	0.330676	1.1426	1.16739	0.764335	0.757659	0.0290374	0.0237109	0.113784	0.10932		354.8	0.503277	0.50708	0.085043	0.0909375	0.00559024	0.00939156	0.00458409	0.00744228	0.0343332	0.0400504	0.00471242	0.00814064	0.236281	0.243983		354.8	-0.00137	0	-0.01033	0	-0.00439	0	-0.00785	0	-0.00805	0	-0.0048	0	-0.0027	0
355	0.0261952	0.0196867	0.0608018	0.0494128	0.329173	0.331149	1.14234	1.16766	0.765089	0.758384	0.0290278	0.0237514	0.114488	0.109497		355	0.503126	0.50708	0.0853374	0.0909435	0.00588456	0.00939321	0.00500193	0.00744374	0.0347551	0.0400559	0.00468393	0.00814219	0.236629	0.243984		355	-0.00198	0	-0.01038	0	-0.00517	0	-0.00838	0	-0.0083	0	-0.00564	0	-0.00262	0
355.2	0.0266206	0.0197204	0.0613829	0.049496	0.329828	0.331622	1.14278	1.16792	0.765966	0.759107	0.0290823	0.023792	0.115098	0.109674		355.2	0.503452	0.50708	0.085301	0.0909494	0.00599683	0.00939485	0.00553334	0.00744518	0.034564	0.0400614	0.00463107	0.00814373	0.236607	0.243986		355.2	-0.002	0	-0.00969	0	-0.00478	0	-0.00851	0	-0.00768	0	-0.00576	0	-0.00225	0
355.4	0.0261824	0.0197542	0.0611817	0.0495792	0.329858	0.332094	1.14268	1.16819	0.766627	0.759829	0.0283418	0.0238325	0.115056	0.109851		355.4	0.503407	0.50708	0.0855336	0.0909552	0.00569919	0.00939648	0.00528873	0.00744662	0.0345647	0.0400669	0.00416352	0.00814526	0.236473	0.243987		355.4	-0.00231	0	-0.00993	0	-0.00509	0	-0.00913	0	-0.00795	0	-0.00596	0	-0.00251	0
355.6	0.0257236	0.0197879	0.0611547	0.0496624	0.329636	0.332566	1.14245	1.16845	0.766539	0.76055	0.0280507	0.0238731	0.114903	0.110028		355.6	0.503054	0.50708	0.0853575	0.090961	0.00568319	0.0093981	0.0058112	0.00744805	0.0348136	0.0400723	0.00425226	0.00814678	0.236957	0.243989		355.6	-0.00232	0	-0.00959	0	-0.00506	0	-0.00922	0	-0.00798	0	-0.00588	0	-0.00261	0
355.8	0.0254341	0.0198217	0.0607351	0.0497457	0.329493	0.333038	1.14235	1.16871	0.76646	0.761269	0.0277306	0.0239136	0.114786	0.110205		355.8	0.503301	0.50708	0.085274	0.0909667	0.00565514	0.00939972	0.00591183	0.00744947	0.0350473	0.0400777	0.00406553	0.0081483	0.236701	0.24399		355.8	-0.00225	0	-0.00913	0	-0.00488	0	-0.0094	0	-0.00813	0	-0.00595	0	-0.0024	0
356	0.0251967	0.0198554	0.0606888	0.0498289	0.32975	0.333509	1.14241	1.16897	0.766969	0.761987	0.0276034	0.0239541	0.11462	0.110382		356	0.503369	0.50708	0.0854644	0.0909724	0.00587781	0.00940132	0.00607268	0.00745088	0.0353571	0.040083	0.00413391	0.0081498	0.236995	0.243991		356	-0.00209	0	-0.00887	0	-0.00472	0	-0.00925	0	-0.00817	0	-0.00549	0	-0.00231	0
356.2	0.0250039	0.0198892	0.0607649	0.049912	0.330145	0.333981	1.14276	1.16923	0.767285	0.762704	0.0273935	0.0239947	0.115019	0.110559		356.2	0.503458	0.50708	0.0852435	0.0909781	0.00620745	0.00940291	0.00630321	0.00745229	0.035671	0.0400883	0.00468731	0.0081513	0.237197	0.243993		356.2	-0.00183	0	-0.00899	0	-0.0045	0	-0.00914	0	-0.008	0	-0.00566	0	-0.00206	0
356.4	0.0253305	0.0199229	0.060908	0.0499952	0.330838	0.334451	1.14351	1.16948	0.768319	0.763419	0.0279654	0.0240352	0.116012	0.110736		356.4	0.503228	0.50708	0.0852437	0.0909837	0.006556	0.00940449	0.00643111	0.00745368	0.0355075	0.0400936	0.00511455	0.00815278	0.236935	0.243994		356.4	-0.00169	0	-0.00842	0	-0.00374	0	-0.00916	0	-0.00788	0	-0.00518	0	-0.00178	0
356.6	0.0249556	0.0199567	0.0602038	0.0500784	0.330773	0.334922	1.14314	1.16974	0.768304	0.764133	0.0279075	0.0240757	0.115926	0.110912		356.6	0.503269	0.50708	0.0851356	0.0909892	0.00684034	0.00940606	0.00621052	0.00745507	0.0357111	0.0400989	0.0053236	0.00815426	0.236987	0.243995		356.6	-0.00205	0	-0.00864	0	-0.00391	0	-0.00912	0	-0.00789	0	-0.00453	0	-0.00168	0
356.8	0.0258156	0.0199904	0.0609348	0.0501615	0.331922	0.335392	1.14444	1.16999	0.769458	0.764845	0.0284494	0.0241163	0.116178	0.111089		356.8	0.503557	0.50708	0.0854782	0.0909947	0.00761043	0.00940762	0.00658602	0.00745645	0.036013	0.0401041	0.00577761	0.00815573	0.237518	0.243996		356.8	-0.00143	0	-0.00854	0	-0.003	0	-0.00777	0	-0.00745	0	-0.00358	0	-0.00133	0
357	0.0258293	0.0200242	0.0612044	0.0502447	0.332846	0.335862	1.14498	1.17025	0.769963	0.765556	0.0288777	0.0241568	0.116045	0.111266		357	0.50351	0.50708	0.0853756	0.0910002	0.00823838	0.00940917	0.00624523	0.00745782	0.0356348	0.0401092	0.00574054	0.00815719	0.237809	0.243998		357	-0.00184	0	-0.00912	0	-0.00317	0	-0.00765	0	-0.00787	0	-0.00337	0	-0.00177	0
357.2	0.0263763	0.0200579	0.0615339	0.0503278	0.333295	0.336332	1.14607	1.1705	0.770713	0.766266	0.0294877	0.0241973	0.116134	0.111443		357.2	0.503924	0.50708	0.085732	0.0910056	0.00873963	0.00941072	0.00605119	0.00745918	0.0358958	0.0401144	0.00615875	0.00815864	0.237894	0.243999		357.2	-0.00184	0	-0.00946	0	-0.00326	0	-0.00755	0	-0.00851	0	-0.00338	0	-0.00202	0
357.4	0.0263856	0.0200917	0.0611347	0.050411	0.333989	0.336801	1.1465	1.17075	0.771149	0.766974	0.0292455	0.0242378	0.115755	0.111619		357.4	0.504361	0.50708	0.0856523	0.0910109	0.00872769	0.00941225	0.00614232	0.00746054	0.0355789	0.0401195	0.00655521	0.00816008	0.238208	0.244		357.4	-0.00257	0	-0.01041	0	-0.00416	0	-0.00784	0	-0.00911	0	-0.00458	0	-0.00311	0
357.6	0.0264546	0.0201254	0.060764	0.0504941	0.334966	0.33727	1.14735	1.17099	0.77234	0.767681	0.0296376	0.0242783	0.115737	0.111796		357.6	0.504995	0.50708	0.0860131	0.0910163	0.00940234	0.00941377	0.00643974	0.00746188	0.0357863	0.0401245	0.00737654	0.00816151	0.23921	0.244001		357.6	-0.00264	0	-0.01047	0	-0.00434	0	-0.00783	0	-0.00949	0	-0.00454	0	-0.00349	0
357.8	0.0270324	0.0201591	0.0610901	0.0505772	0.335514	0.337738	1.14804	1.17124	0.773846	0.768387	0.0296602	0.0243189	0.115878	0.111972		357.8	0.505096	0.50708	0.0857607	0.0910215	0.00965006	0.00941529	0.0059745	0.00746322	0.0354497	0.0401296	0.00743259	0.00816294	0.23943	0.244003		357.8	-0.00282	0	-0.01057	0	-0.00429	0	-0.00756	0	-0.00924	0	-0.00446	0	-0.00321	0
358	0.0278398	0.0201929	0.0614036	0.0506603	0.336318	0.338207	1.14872	1.17148	0.77506	0.769091	0.0297232	0.0243594	0.116201	0.112149		358	0.505367	0.50708	0.0859619	0.0910268	0.00960083	0.00941679	0.00605349	0.00746455	0.0358237	0.0401346	0.00706468	0.00816435	0.239452	0.244004		358	-0.00259	0	-0.01081	0	-0.00473	0	-0.0071	0	-0.00962	0	-0.00476	0	-0.00312	0
358.2	0.0280252	0.0202266	0.0612781	0.0507434	0.336834	0.338675	1.14872	1.17173	0.775844	0.769794	0.0300967	0.0243999	0.116121	0.112325		358.2	0.505064	0.50708	0.0860736	0.0910319	0.00906487	0.00941829	0.0057331	0.00746587	0.0356989	0.0401395	0.0067145	0.00816576	0.238963	0.244005		358.2	-0.00322	0	-0.01201	0	-0.00521	0	-0.00751	0	-0.01008	0	-0.00585	0	-0.00376	0
358.4	0.0287077	0.0202603	0.0624933	0.0508265	0.337815	0.339142	1.14976	1.17197	0.777681	0.770495	0.0306779	0.0244404	0.117037	0.112502		358.4	0.505382	0.50708	0.0862874	0.0910371	0.0088314	0.00941977	0.00597698	0.00746719	0.0361896	0.0401444	0.00674207	0.00816716	0.239467	0.244006		358.4	-0.00286	0	-0.01229	0	-0.00535	0	-0.00757	0	-0.0103	0	-0.00568	0	-0.00395	0
358.6	0.0287552	0.0202941	0.0625137	0.0509096	0.338093	0.33961	1.15042	1.17221	0.778821	0.771196	0.0310774	0.0244809	0.117329	0.112678		358.6	0.505246	0.50708	0.0862544	0.0910422	0.00858065	0.00942125	0.00640149	0.00746849	0.0364351	0.0401494	0.00633912	0.00816855	0.23938	0.244007		358.6	-0.00278	0	-0.0124	0	-0.00576	0	-0.00809	0	-0.0104	0	-0.00594	0	-0.00346	0
358.8	0.0291209	0.0203278	0.0626175	0.0509926	0.339266	0.340077	1.15087	1.17245	0.77975	0.771895	0.0315382	0.0245214	0.11786	0.112854		358.8	0.505452	0.50708	0.0866332	0.0910472	0.00894543	0.00942271	0.00682308	0.00746979	0.0370547	0.0401542	0.00612033	0.00816993	0.239404	0.244008		358.8	-0.00253	0	-0.01193	0	-0.00598	0	-0.00808	0	-0.0106	0	-0.00596	0	-0.00315	0
359	0.0295202	0.0203615	0.0629896	0.0510757	0.340091	0.340544	1.15089	1.17269	0.780642	0.772592	0.0320259	0.0245619	0.118462	0.11303		359	0.505152	0.50708	0.0863614	0.0910522	0.00839981	0.00942417	0.00636213	0.00747108	0.0367367	0.040159	0.00529127	0.0081713	0.239335	0.244009		359	-0.00279	0	-0.01204	0	-0.00628	0	-0.0084	0	-0.01106	0	-0.00584	0	-0.00296	0
359.2	0.029677	0.0203953	0.0633743	0.0511587	0.340941	0.34101	1.1512	1.17293	0.781523	0.773288	0.0323101	0.0246024	0.118434	0.113207		359.2	0.505288	0.50708	0.0859739	0.0910572	0.00825688	0.00942562	0.00680387	0.00747236	0.0365571	0.0401638	0.00542256	0.00817266	0.239276	0.24401		359.2	-0.00253	0	-0.01187	0	-0.00618	0	-0.00854	0	-0.01112	0	-0.00583	0	-0.00286	0
359.4	0.0289328	0.020429	0.0627766	0.0512418	0.340772	0.341476	1.15112	1.17316	0.781477	0.773983	0.0316959	0.0246429	0.118276	0.113383		359.4	0.504928	0.50708	0.0859156	0.0910621	0.00776008	0.00942706	0.0067517	0.00747364	0.036771	0.0401686	0.00489597	0.00817402	0.239277	0.244011		359.4	-0.00223	0	-0.01198	0	-0.00648	0	-0.00881	0	-0.01103	0	-0.00599	0	-0.00272	0
359.6	0.0288612	0.0204627	0.0633339	0.0513248	0.340996	0.341942	1.15085	1.1734	0.781393	0.774677	0.0317284	0.0246834	0.117906	0.113559		359.6	0.504548	0.50708	0.0854281	0.091067	0.00786013	0.00942849	0.0065337	0.0074749	0.036721	0.0401733	0.00467486	0.00817537	0.239152	0.244012		359.6	-0.00193	0	-0.01192	0	-0.00654	0	-0.00891	0	-0.01109	0	-0.00604	0	-0.0029	0
359.8	0.0287878	0.0204964	0.0637748	0.0514078	0.341524	0.342407	1.15106	1.17363	0.782017	0.775369	0.0318417	0.0247238	0.118086	0.113735		359.8	0.504901	0.50708	0.0852961	0.0910719	0.00773594	0.00942991	0.00651414	0.00747616	0.0366318	0.040178	0.00463525	0.00817671	0.238768	0.244014		359.8	-0.00126	0	-0.01136	0	-0.00611	0	-0.00866	0	-0.01086	0	-0.0055	0	-0.00271	0
360	0.0289603	0.0205301	0.0644793	0.0514908	0.342439	0.342873	1.15108	1.17386	0.782747	0.77606	0.0317534	0.0247643	0.118544	0.113911		360	0.504599	0.50708	0.0854931	0.0910767	0.00750288	0.00943132	0.00644831	0.00747742	0.0367685	0.0401827	0.00482058	0.00817804	0.23883	0.244015		360	-0.00132	0	-0.01146	0	-0.00591	0	-0.00871	0	-0.01075	0	-0.00533	0	-0.00316	0
360.2	0.0289811	0.0205639	0.0648417	0.0515738	0.342535	0.343338	1.15117	1.17409	0.783121	0.77675	0.0318674	0.0248048	0.119336	0.114087		360.2	0.50425	0.50708	0.0847174	0.0910814	0.00677346	0.00943273	0.00601169	0.00747866	0.0357931	0.0401873	0.00485861	0.00817936	0.238506	0.244016		360.2	-0.00072	0	-0.01128	0	-0.00547	0	-0.00833	0	-0.0097	0	-0.00503	0	-0.00301	0
360.4	0.0286638	0.0205976	0.0650978	0.0516568	0.342682	0.343802	1.1512	1.17432	0.78385	0.777438	0.0317357	0.0248453	0.119374	0.114263		360.4	0.504079	0.50708	0.0848287	0.0910862	0.00691203	0.00943412	0.00603921	0.0074799	0.0357756	0.0401919	0.00516719	0.00818068	0.23825	0.244017		360.4	-0.00043	0	-0.01079	0	-0.00539	0	-0.00765	0	-0.00955	0	-0.00449	0	-0.00328	0
360.6	0.0286432	0.0206313	0.0650065	0.0517398	0.342933	0.344266	1.15119	1.17455	0.783879	0.778125	0.0313169	0.0248858	0.119256	0.114439		360.6	0.504731	0.50708	0.0854161	0.0910908	0.00725482	0.00943551	0.00669633	0.00748113	0.0362362	0.0401965	0.00585972	0.00818199	0.238626	0.244018		360.6	-0.00064	0	-0.01094	0	-0.00526	0	-0.0074	0	-0.00948	0	-0.0039	0	-0.00403	0
360.8	0.028751	0.020665	0.0657945	0.0518228	0.343405	0.34473	1.15212	1.17477	0.78506	0.778811	0.0314776	0.0249263	0.119945	0.114615		360.8	0.504812	0.50708	0.0855414	0.0910955	0.0075107	0.00943689	0.00663858	0.00748235	0.035972	0.0402011	0.00615122	0.00818329	0.238551	0.244018		360.8	-8.4e-05	0	-0.01086	0	-0.00472	0	-0.00705	0	-0.00928	0	-0.00347	0	-0.00361	0
361	0.0282977	0.0206987	0.0658787	0.0519058	0.34335	0.345194	1.1518	1.175	0.784996	0.779495	0.030863	0.0249667	0.120164	0.114791		361	0.504587	0.50708	0.0851791	0.0911001	0.0075637	0.00943826	0.00602041	0.00748356	0.0354745	0.0402056	0.00626802	0.00818458	0.23812	0.244019		361	-0.00037	0	-0.0112	0	-0.0049	0	-0.00762	0	-0.00962	0	-0.00365	0	-0.0046	0
361.2	0.0284952	0.0207324	0.0659274	0.0519887	0.343469	0.345658	1.1522	1.17522	0.785316	0.780178	0.0307203	0.0250072	0.120358	0.114966		361.2	0.504394	0.50708	0.0847593	0.0911046	0.00767097	0.00943962	0.00595553	0.00748477	0.0353171	0.04021	0.00698923	0.00818586	0.237909	0.24402		361.2	-0.00058	0	-0.01118	0	-0.00518	0	-0.00785	0	-0.00964	0	-0.00377	0	-0.00454	0
361.4	0.0284057	0.0207661	0.0653412	0.0520717	0.343883	0.346121	1.15245	1.17544	0.7859	0.78086	0.0302295	0.0250477	0.120536	0.115142		361.4	0.504002	0.50708	0.0846948	0.0911092	0.00744186	0.00944097	0.00591065	0.00748597	0.0352415	0.0402145	0.00655145	0.00818714	0.23809	0.244021		361.4	-0.00145	0	-0.01142	0	-0.00537	0	-0.00824	0	-0.00953	0	-0.00424	0	-0.00507	0
361.6	0.0285297	0.0207998	0.0652999	0.0521546	0.344743	0.346583	1.1531	1.17567	0.787344	0.78154	0.0303458	0.0250881	0.121065	0.115318		361.6	0.504268	0.50708	0.0847502	0.0911137	0.00813481	0.00944231	0.00560678	0.00748717	0.0352524	0.0402189	0.00691894	0.00818841	0.2385	0.244022		361.6	-0.00155	0	-0.01128	0	-0.00473	0	-0.00813	0	-0.0091	0	-0.00422	0	-0.00534	0
361.8	0.0282544	0.0208335	0.0654887	0.0522375	0.344574	0.347046	1.15351	1.17589	0.787865	0.782219	0.0294671	0.0251286	0.120989	0.115494		361.8	0.503997	0.50708	0.0843123	0.0911181	0.00785957	0.00944365	0.00515128	0.00748835	0.034982	0.0402233	0.00623632	0.00818967	0.237631	0.244023		361.8	-0.00189	0	-0.01147	0	-0.00436	0	-0.00807	0	-0.00917	0	-0.00449	0	-0.00543	0
362	0.0279524	0.0208672	0.0652144	0.0523204	0.345013	0.347508	1.15369	1.1761	0.788565	0.782897	0.0290826	0.025169	0.120681	0.115669		362	0.50423	0.50708	0.0848222	0.0911225	0.00799713	0.00944498	0.00569549	0.00748953	0.0353337	0.0402277	0.00640717	0.00819092	0.237592	0.244024		362	-0.00261	0	-0.01233	0	-0.00511	0	-0.00865	0	-0.00967	0	-0.00504	0	-0.00578	0
362.2	0.0281011	0.0209009	0.0649303	0.0524034	0.345156	0.34797	1.15337	1.17632	0.788972	0.783574	0.0291196	0.0252095	0.121019	0.115845		362.2	0.504443	0.50708	0.0853005	0.0911269	0.00757673	0.00944629	0.00535625	0.0074907	0.0356298	0.040232	0.00599044	0.00819217	0.237422	0.244025		362.2	-0.00322	0	-0.013	0	-0.00524	0	-0.00941	0	-0.00955	0	-0.00528	0	-0.00597	0
362.4	0.0279347	0.0209346	0.0647978	0.0524863	0.345463	0.348431	1.15417	1.17654	0.790076	0.784249	0.0290766	0.02525	0.121497	0.11602		362.4	0.504575	0.50708	0.0857062	0.0911312	0.00787941	0.0094476	0.00548353	0.00749187	0.036297	0.0402363	0.00608845	0.00819341	0.237915	0.244026		362.4	-0.00348	0	-0.01274	0	-0.00526	0	-0.00951	0	-0.00949	0	-0.00494	0	-0.00555	0
362.6	0.0275271	0.0209683	0.0637595	0.0525692	0.345211	0.348892	1.1535	1.17675	0.790084	0.784923	0.0289832	0.0252904	0.121259	0.116196		362.6	0.50459	0.50708	0.0856804	0.0911355	0.00811285	0.00944891	0.00546994	0.00749302	0.036446	0.0402406	0.00595763	0.00819464	0.23825	0.244027		362.6	-0.00398	0	-0.01254	0	-0.0058	0	-0.01005	0	-0.00927	0	-0.00524	0	-0.00543	0
362.8	0.0276485	0.021002	0.0637291	0.052652	0.345992	0.349353	1.15379	1.17697	0.790921	0.785596	0.0289386	0.0253309	0.121608	0.116371		362.8	0.504814	0.50708	0.0857048	0.0911398	0.00819375	0.0094502	0.00505332	0.00749418	0.0364919	0.0402448	0.00600571	0.00819586	0.238072	0.244027		362.8	-0.00383	0	-0.01246	0	-0.00592	0	-0.00998	0	-0.00965	0	-0.00541	0	-0.00521	0
363	0.0275759	0.0210357	0.0632432	0.0527349	0.346042	0.349814	1.15349	1.17718	0.791025	0.786267	0.0289942	0.0253713	0.121194	0.116547		363	0.505664	0.50708	0.0855916	0.091144	0.00811322	0.00945149	0.00540761	0.00749532	0.0363682	0.040249	0.00583957	0.00819708	0.238347	0.244028		363	-0.00416	0	-0.01238	0	-0.00599	0	-0.01025	0	-0.00936	0	-0.00541	0	-0.00469	0
363.2	0.027639	0.0210694	0.0636435	0.0528178	0.346744	0.350274	1.15409	1.17739	0.791781	0.786937	0.0293371	0.0254118	0.121176	0.116722		363.2	0.505698	0.50708	0.0854562	0.0911482	0.00852176	0.00945276	0.00574968	0.00749646	0.0363552	0.0402532	0.00616575	0.00819829	0.238421	0.244029		363.2	-0.00413	0	-0.01217	0	-0.00558	0	-0.0097	0	-0.00892	0	-0.00586	0	-0.00415	0
363.4	0.0275375	0.0211031	0.0636921	0.0529006	0.346799	0.350734	1.15446	1.1776	0.792129	0.787606	0.0295779	0.0254522	0.121452	0.116897		363.4	0.505789	0.50708	0.0854493	0.0911524	0.00831993	0.00945403	0.00552207	0.00749759	0.035831	0.0402573	0.00585095	0.00819949	0.23862	0.24403		363.4	-0.00399	0	-0.01226	0	-0.00625	0	-0.00976	0	-0.00925	0	-0.00629	0	-0.0043	0
363.6	0.0280627	0.0211368	0.0640055	0.0529835	0.347206	0.351194	1.15462	1.17781	0.79331	0.788274	0.0304118	0.0254926	0.121296	0.117072		363.6	0.505914	0.50708	0.0856004	0.0911565	0.00862978	0.0094553	0.00563687	0.00749871	0.0355795	0.0402615	0.00598802	0.00820068	0.238411	0.244031		363.6	-0.00367	0	-0.01197	0	-0.00603	0	-0.00921	0	-0.00968	0	-0.00624	0	-0.00417	0
363.8	0.0283484	0.0211705	0.0644286	0.0530663	0.347972	0.351653	1.15517	1.17802	0.794284	0.78894	0.030957	0.0255331	0.121493	0.117248		363.8	0.506513	0.50708	0.0860992	0.0911606	0.00926575	0.00945655	0.00621545	0.00749983	0.0361319	0.0402656	0.00671701	0.00820187	0.239366	0.244032		363.8	-0.00322	0	-0.01149	0	-0.0056	0	-0.00831	0	-0.00936	0	-0.00583	0	-0.0039	0
364	0.0288326	0.0212042	0.064533	0.0531491	0.34859	0.352112	1.15538	1.17823	0.795295	0.789605	0.031342	0.0255735	0.121694	0.117423		364	0.506193	0.50708	0.0863135	0.0911646	0.00916869	0.0094578	0.00650372	0.00750094	0.0364168	0.0402696	0.0066698	0.00820305	0.239618	0.244032		364	-0.00365	0	-0.01185	0	-0.00598	0	-0.00828	0	-0.00944	0	-0.00624	0	-0.00401	0
364.2	0.0283435	0.0212379	0.0645122	0.053232	0.348214	0.352571	1.15533	1.17843	0.796156	0.790269	0.0315509	0.0256139	0.121703	0.117598		364.2	0.506038	0.50708	0.0863209	0.0911687	0.00894817	0.00945904	0.00658167	0.00750204	0.0358682	0.0402737	0.00648914	0.00820422	0.239626	0.244033		364.2	-0.0033	0	-0.01146	0	-0.00595	0	-0.00774	0	-0.00968	0	-0.00613	0	-0.00386	0
364.4	0.0283257	0.0212715	0.0645369	0.0533148	0.348401	0.35303	1.15586	1.17864	0.796957	0.790931	0.0316027	0.0256544	0.121224	0.117773		364.4	0.50649	0.50708	0.0867861	0.0911726	0.00894914	0.00946027	0.0068686	0.00750314	0.0365263	0.0402777	0.00683894	0.00820538	0.239739	0.244034		364.4	-0.00338	0	-0.01166	0	-0.00594	0	-0.00746	0	-0.01027	0	-0.00585	0	-0.00373	0
364.6	0.0284989	0.0213052	0.0645128	0.0533976	0.348946	0.353488	1.15585	1.17884	0.797387	0.791592	0.0315047	0.0256948	0.121931	0.117948		364.6	0.50652	0.50708	0.0872727	0.0911766	0.00908144	0.00946149	0.00748523	0.00750423	0.0365366	0.0402817	0.00712402	0.00820654	0.240036	0.244035		364.6	-0.00387	0	-0.01158	0	-0.0056	0	-0.00735	0	-0.0106	0	-0.00577	0	-0.00355	0
364.8	0.0285046	0.0213389	0.0646715	0.0534804	0.349309	0.353946	1.15584	1.17904	0.797974	0.792252	0.0322016	0.0257352	0.122528	0.118123		364.8	0.50621	0.50708	0.0873185	0.0911805	0.00916513	0.0094627	0.00700068	0.00750531	0.0365647	0.0402857	0.00697981	0.00820769	0.240207	0.244035		364.8	-0.00348	0	-0.01141	0	-0.00532	0	-0.00739	0	-0.01092	0	-0.0057	0	-0.00316	0
365	0.0287129	0.0213726	0.0648115	0.0535632	0.349867	0.354403	1.15617	1.17924	0.798467	0.792911	0.0323119	0.0257756	0.122722	0.118298		365	0.505879	0.50708	0.0871504	0.0911844	0.00943774	0.00946391	0.00687594	0.00750639	0.036382	0.0402896	0.00712946	0.00820884	0.240394	0.244036		365	-0.00364	0	-0.01118	0	-0.00539	0	-0.00754	0	-0.01138	0	-0.00549	0	-0.0035	0
365.2	0.0291493	0.0214063	0.0649171	0.0536459	0.350751	0.35486	1.1564	1.17944	0.799383	0.793568	0.032678	0.025816	0.123155	0.118473		365.2	0.505813	0.50708	0.0870357	0.0911883	0.00932936	0.00946511	0.00686704	0.00750746	0.0362943	0.0402935	0.00724023	0.00820997	0.24023	0.244037		365.2	-0.00372	0	-0.0109	0	-0.00573	0	-0.00777	0	-0.01155	0	-0.00532	0	-0.00278	0
365.4	0.0289582	0.0214399	0.0647319	0.0537287	0.351519	0.355317	1.15693	1.17964	0.800209	0.794225	0.0326499	0.0258565	0.123267	0.118648		365.4	0.50577	0.50708	0.087405	0.0911921	0.00940392	0.00946631	0.00672632	0.00750852	0.0362977	0.0402974	0.00682496	0.0082111	0.240813	0.244037		365.4	-0.00329	0	-0.01089	0	-0.00516	0	-0.00773	0	-0.01171	0	-0.00516	0	-0.00318	0
365.6	0.0287965	0.0214736	0.0651065	0.0538115	0.352519	0.355774	1.15767	1.17984	0.801064	0.79488	0.0326967	0.0258969	0.123288	0.118823		365.6	0.505616	0.50708	0.0872185	0.0911959	0.00926214	0.00946749	0.00619651	0.00750958	0.0359023	0.0403012	0.00657557	0.00821223	0.24037	0.244038		365.6	-0.00265	0	-0.01076	0	-0.00463	0	-0.00761	0	-0.01166	0	-0.00484	0	-0.00317	0
365.8	0.0282854	0.0215073	0.0651263	0.0538942	0.352407	0.35623	1.15767	1.18003	0.801211	0.795533	0.0321323	0.0259373	0.123025	0.118997		365.8	0.50565	0.50708	0.0872475	0.0911996	0.00906003	0.00946867	0.00670211	0.00751063	0.0360664	0.0403051	0.00644474	0.00821334	0.240176	0.244039		365.8	-0.00226	0	-0.01016	0	-0.00397	0	-0.00704	0	-0.01154	0	-0.00406	0	-0.00235	0
366	0.0281914	0.0215409	0.0652159	0.0539769	0.353	0.356686	1.15764	1.18023	0.801542	0.796186	0.0320986	0.0259777	0.123167	0.119172		366	0.505991	0.50708	0.087443	0.0912034	0.00953743	0.00946984	0.00681994	0.00751168	0.035759	0.0403089	0.00618059	0.00821445	0.240295	0.24404		366	-0.00225	0	-0.01045	0	-0.00374	0	-0.00696	0	-0.01108	0	-0.004	0	-0.00213	0
366.2	0.0277036	0.0215746	0.0648505	0.0540597	0.353056	0.357142	1.15697	1.18042	0.801174	0.796837	0.0313228	0.0260181	0.122935	0.119347		366.2	0.506075	0.50708	0.0876629	0.091207	0.00943642	0.009471	0.00680647	0.00751272	0.035839	0.0403126	0.00581095	0.00821556	0.24006	0.24404		366.2	-0.00215	0	-0.01042	0	-0.00329	0	-0.00712	0	-0.01061	0	-0.00388	0	-0.00207	0
366.4	0.0270319	0.0216083	0.0645564	0.0541424	0.352963	0.357597	1.15711	1.18062	0.801514	0.797487	0.0306294	0.0260585	0.122045	0.119522		366.4	0.506046	0.50708	0.0872778	0.0912107	0.00959935	0.00947216	0.00678851	0.00751375	0.0359233	0.0403164	0.0059635	0.00821665	0.240198	0.244041		366.4	-0.00197	0	-0.01007	0	-0.00289	0	-0.00707	0	-0.01028	0	-0.00345	0	-0.00207	0
366.6	0.0269919	0.021642	0.0644943	0.0542251	0.35283	0.358052	1.15735	1.18081	0.801931	0.798135	0.0306812	0.0260989	0.122381	0.119696		366.6	0.506379	0.50708	0.0867353	0.0912143	0.00959616	0.00947331	0.00664797	0.00751477	0.0356141	0.0403201	0.00586303	0.00821774	0.239887	0.244042		366.6	-0.00116	0	-0.0099	0	-0.00312	0	-0.00741	0	-0.01008	0	-0.00332	0	-0.00192	0
366.8	0.0271461	0.0216756	0.0645174	0.0543078	0.353397	0.358507	1.15778	1.181	0.802465	0.798783	0.0303898	0.0261393	0.122231	0.119871		366.8	0.506804	0.50708	0.0868681	0.0912179	0.00971832	0.00947445	0.00684015	0.0075158	0.0355381	0.0403238	0.00570293	0.00821882	0.239487	0.244042		366.8	-0.00092	0	-0.01018	0	-0.00309	0	-0.00773	0	-0.00996	0	-0.00313	0	-0.0016	0
367	0.0276013	0.0217093	0.0644051	0.0543905	0.353486	0.358962	1.15834	1.18119	0.802651	0.799429	0.0300939	0.0261797	0.122175	0.120045		367	0.507371	0.50708	0.0870433	0.0912215	0.0103102	0.00947558	0.00770027	0.00751681	0.0353525	0.0403275	0.00556428	0.0082199	0.239293	0.244043		367	-0.00087	0	-0.00978	0	-0.00256	0	-0.00789	0	-0.00949	0	-0.00293	0	-0.00138	0
367.2	0.0277132	0.0217429	0.06492	0.0544732	0.354089	0.359416	1.15928	1.18138	0.803329	0.800074	0.0304143	0.0262201	0.122552	0.12022		367.2	0.507083	0.50708	0.08708	0.091225	0.0104893	0.00947671	0.00756029	0.00751782	0.0351238	0.0403312	0.00541636	0.00822097	0.238764	0.244043		367.2	-0.00089	0	-0.00993	0	-0.00273	0	-0.00809	0	-0.00979	0	-0.00351	0	-0.00162	0
367.4	0.0278197	0.0217766	0.06499	0.0545559	0.354397	0.35987	1.15955	1.18157	0.803767	0.800718	0.0304426	0.0262605	0.122825	0.120394		367.4	0.506952	0.50708	0.0869855	0.0912286	0.0106988	0.00947783	0.007588	0.00751882	0.0348272	0.0403348	0.00539265	0.00822203	0.238529	0.244044		367.4	-0.0012	0	-0.01034	0	-0.00318	0	-0.00875	0	-0.01011	0	-0.00378	0	-0.00222	0
367.6	0.0278069	0.0218102	0.0652895	0.0546385	0.35476	0.360324	1.15955	1.18175	0.804481	0.80136	0.0306785	0.0263009	0.122881	0.120568		367.6	0.506652	0.50708	0.0872735	0.091232	0.0109153	0.00947894	0.00781039	0.00751982	0.0352053	0.0403384	0.00600052	0.00822309	0.2384	0.244045		367.6	-0.00196	0	-0.01069	0	-0.00318	0	-0.00899	0	-0.01039	0	-0.00411	0	-0.00207	0
367.8	0.0280197	0.0218439	0.065959	0.0547212	0.355489	0.360777	1.15999	1.18194	0.805142	0.802002	0.031048	0.0263412	0.122802	0.120743		367.8	0.506415	0.50708	0.0877719	0.0912355	0.0115156	0.00948005	0.00798224	0.00752081	0.0360779	0.040342	0.00664884	0.00822414	0.238954	0.244045		367.8	-0.00219	0	-0.0109	0	-0.0032	0	-0.00953	0	-0.0101	0	-0.00421	0	-0.00229	0
368	0.0283945	0.0218775	0.0662976	0.0548038	0.356004	0.36123	1.16036	1.18212	0.80619	0.802642	0.0310007	0.0263816	0.122806	0.120917		368	0.505685	0.50708	0.0879257	0.0912389	0.0108177	0.00948115	0.00764338	0.00752179	0.0358548	0.0403455	0.00620087	0.00822519	0.23827	0.244046		368	-0.00298	0	-0.01145	0	-0.00353	0	-0.00974	0	-0.01015	0	-0.00455	0	-0.00241	0
368.2	0.0283479	0.0219112	0.066487	0.0548865	0.356485	0.361683	1.16032	1.18231	0.807096	0.80328	0.0311792	0.026422	0.123205	0.121091		368.2	0.50529	0.50708	0.0877471	0.0912423	0.00982628	0.00948224	0.0069951	0.00752277	0.0354149	0.040349	0.00569842	0.00822622	0.237644	0.244046		368.2	-0.00311	0	-0.01158	0	-0.00368	0	-0.0098	0	-0.01064	0	-0.00474	0	-0.00262	0
368.4	0.0286151	0.0219449	0.0665582	0.0549691	0.357184	0.362135	1.16076	1.18249	0.807419	0.803918	0.0311326	0.0264624	0.123393	0.121266		368.4	0.505103	0.50708	0.0873268	0.0912456	0.00928109	0.00948333	0.00674639	0.00752374	0.0356209	0.0403526	0.00619789	0.00822726	0.237834	0.244047		368.4	-0.00381	0	-0.01223	0	-0.00389	0	-0.01024	0	-0.01078	0	-0.00477	0	-0.00271	0
368.6	0.028921	0.0219785	0.0668577	0.0550517	0.358259	0.362587	1.16104	1.18267	0.807915	0.804554	0.0313975	0.0265027	0.124175	0.12144		368.6	0.504955	0.50708	0.0876731	0.091249	0.00929196	0.00948441	0.00703132	0.00752471	0.0358602	0.040356	0.00686455	0.00822828	0.238064	0.244048		368.6	-0.00403	0	-0.01193	0	-0.00393	0	-0.01029	0	-0.0109	0	-0.00529	0	-0.00273	0
368.8	0.0290209	0.0220122	0.066589	0.0551343	0.35907	0.363039	1.16115	1.18285	0.808527	0.80519	0.0320271	0.0265431	0.12439	0.121614		368.8	0.504804	0.50708	0.0875635	0.0912523	0.00909445	0.00948548	0.00631659	0.00752567	0.0359684	0.0403595	0.00707838	0.0082293	0.238514	0.244048		368.8	-0.00414	0	-0.01211	0	-0.00458	0	-0.01076	0	-0.01124	0	-0.00551	0	-0.00306	0
369	0.0293304	0.0220458	0.066933	0.0552169	0.35986	0.36349	1.16166	1.18303	0.809528	0.805824	0.0322904	0.0265835	0.124857	0.121788		369	0.505144	0.50708	0.0870928	0.0912556	0.00875498	0.00948655	0.00585104	0.00752662	0.0359577	0.0403629	0.00734801	0.00823031	0.238628	0.244049		369	-0.00405	0	-0.01204	0	-0.00506	0	-0.01077	0	-0.01153	0	-0.00557	0	-0.00321	0
369.2	0.029404	0.0220794	0.0670912	0.0552995	0.360576	0.363942	1.16164	1.18321	0.809897	0.806456	0.0324909	0.0266239	0.125188	0.121962		369.2	0.505712	0.50708	0.0869248	0.0912588	0.00828244	0.0094876	0.00588104	0.00752757	0.0361163	0.0403663	0.00722295	0.00823132	0.23873	0.244049		369.2	-0.00435	0	-0.01193	0	-0.00562	0	-0.01063	0	-0.0114	0	-0.00591	0	-0.00314	0
369.4	0.0295549	0.0221131	0.0674306	0.0553821	0.361477	0.364392	1.16223	1.18339	0.810874	0.807088	0.0332057	0.0266642	0.126186	0.122136		369.4	0.505432	0.50708	0.0864486	0.091262	0.0076135	0.00948866	0.00522899	0.00752851	0.0360818	0.0403697	0.00691888	0.00823232	0.238463	0.24405		369.4	-0.00373	0	-0.01129	0	-0.00497	0	-0.00985	0	-0.01081	0	-0.00556	0	-0.00346	0
369.6	0.0298518	0.0221467	0.067859	0.0554647	0.362447	0.364843	1.16256	1.18356	0.811625	0.807718	0.0335669	0.0267046	0.127057	0.12231		369.6	0.505452	0.50708	0.0862649	0.0912652	0.00745584	0.0094897	0.00528019	0.00752945	0.0362958	0.0403731	0.00670584	0.00823332	0.238296	0.24405		369.6	-0.00415	0	-0.01129	0	-0.00517	0	-0.00946	0	-0.01097	0	-0.00597	0	-0.00333	0
369.8	0.0293364	0.0221804	0.0672875	0.0555472	0.362687	0.365293	1.16212	1.18374	0.812225	0.808347	0.0331784	0.0267449	0.127519	0.122484		369.8	0.505949	0.50708	0.0865258	0.0912684	0.00786255	0.00949074	0.00584488	0.00753038	0.0363617	0.0403764	0.00712896	0.0082343	0.238812	0.244051		369.8	-0.00431	0	-0.01124	0	-0.00521	0	-0.00929	0	-0.01088	0	-0.00642	0	-0.00335	0
370	0.029025	0.022214	0.0671783	0.0556298	0.363039	0.365743	1.16216	1.18391	0.812551	0.808975	0.0328175	0.0267853	0.127623	0.122658		370	0.505873	0.50708	0.0861094	0.0912716	0.00763747	0.00949177	0.00563118	0.00753131	0.0359945	0.0403797	0.00665975	0.00823529	0.238469	0.244051		370	-0.00458	0	-0.01179	0	-0.00548	0	-0.00957	0	-0.01093	0	-0.00729	0	-0.00385	0
370.2	0.0287935	0.0222476	0.0667057	0.0557123	0.362896	0.366193	1.16183	1.18409	0.812807	0.809602	0.0325119	0.0268256	0.127086	0.122832		370.2	0.506094	0.50708	0.0859388	0.0912747	0.00754483	0.0094928	0.00586615	0.00753223	0.0362427	0.040383	0.00680583	0.00823626	0.238212	0.244052		370.2	-0.00429	0	-0.01169	0	-0.00553	0	-0.0094	0	-0.01094	0	-0.00736	0	-0.00384	0
370.4	0.0290516	0.0222813	0.0667484	0.0557949	0.363152	0.366643	1.16239	1.18426	0.813652	0.810228	0.0328056	0.026866	0.127499	0.123005		370.4	0.505984	0.50708	0.085744	0.0912778	0.00722669	0.00949382	0.00550169	0.00753315	0.0364578	0.0403863	0.00678288	0.00823723	0.238391	0.244052		370.4	-0.0038	0	-0.01142	0	-0.00554	0	-0.00914	0	-0.01061	0	-0.00724	0	-0.00371	0
370.6	0.0291761	0.0223149	0.0663438	0.0558774	0.363356	0.367092	1.16263	1.18443	0.814396	0.810852	0.0328114	0.0269063	0.128156	0.123179		370.6	0.506354	0.50708	0.086087	0.0912808	0.00755393	0.00949483	0.00571909	0.00753406	0.0367928	0.0403896	0.00686007	0.0082382	0.238329	0.244053		370.6	-0.00346	0	-0.01097	0	-0.00585	0	-0.00898	0	-0.01005	0	-0.007	0	-0.00348	0
370.8	0.0296118	0.0223485	0.06645	0.0559599	0.363964	0.36754	1.16283	1.1846	0.815126	0.811475	0.0326615	0.0269467	0.128005	0.123353		370.8	0.506436	0.50708	0.0862412	0.0912839	0.00796184	0.00949584	0.00613945	0.00753496	0.0371013	0.0403928	0.00684555	0.00823916	0.238796	0.244053		370.8	-0.00386	0	-0.01122	0	-0.00609	0	-0.00949	0	-0.00984	0	-0.00728	0	-0.00411	0
371	0.0296423	0.0223822	0.0658139	0.0560424	0.364061	0.367989	1.16322	1.18477	0.816093	0.812097	0.0326161	0.026987	0.128329	0.123526		371	0.506838	0.50708	0.0866881	0.0912869	0.00870123	0.00949684	0.00668442	0.00753586	0.0372167	0.040396	0.00678475	0.00824011	0.238981	0.244054		371	-0.00371	0	-0.01075	0	-0.00557	0	-0.00974	0	-0.00993	0	-0.00707	0	-0.00386	0
371.2	0.0289462	0.0224158	0.0657145	0.0561249	0.36415	0.368437	1.16335	1.18494	0.81654	0.812718	0.0329668	0.0270274	0.128147	0.1237		371.2	0.50649	0.50708	0.0866564	0.0912899	0.00855834	0.00949784	0.00628783	0.00753675	0.0367691	0.0403992	0.00631367	0.00824106	0.238709	0.244054		371.2	-0.00388	0	-0.0105	0	-0.0057	0	-0.0098	0	-0.00993	0	-0.00688	0	-0.00367	0
371.4	0.0284709	0.0224494	0.0657178	0.0562074	0.363967	0.368885	1.16301	1.18511	0.816864	0.813337	0.0326003	0.0270677	0.127662	0.123874		371.4	0.506315	0.50708	0.0869338	0.0912928	0.00900907	0.00949882	0.00653311	0.00753764	0.036685	0.0404023	0.00686576	0.008242	0.238959	0.244055		371.4	-0.00403	0	-0.01078	0	-0.0055	0	-0.00962	0	-0.00991	0	-0.00665	0	-0.00389	0
371.6	0.0280249	0.022483	0.0658323	0.0562899	0.363884	0.369333	1.16289	1.18528	0.817468	0.813956	0.032332	0.027108	0.127263	0.124047		371.6	0.505935	0.50708	0.0874523	0.0912958	0.00914216	0.00949981	0.00657532	0.00753853	0.036909	0.0404055	0.00722994	0.00824294	0.239191	0.244055		371.6	-0.00411	0	-0.01105	0	-0.00534	0	-0.00952	0	-0.01039	0	-0.0063	0	-0.00377	0
371.8	0.0278826	0.0225167	0.0657949	0.0563724	0.364217	0.36978	1.16274	1.18544	0.818019	0.814573	0.0318846	0.0271484	0.126568	0.124221		371.8	0.505382	0.50708	0.0879907	0.0912987	0.00940262	0.00950078	0.00612856	0.0075394	0.036923	0.0404086	0.00677109	0.00824387	0.239324	0.244056		371.8	-0.00326	0	-0.01056	0	-0.00505	0	-0.00959	0	-0.00988	0	-0.00573	0	-0.00369	0
372	0.0277032	0.0225503	0.0657749	0.0564548	0.364389	0.370227	1.16273	1.18561	0.818608	0.815189	0.031026	0.0271887	0.126167	0.124394		372	0.504739	0.50708	0.0877852	0.0913016	0.00874681	0.00950175	0.00613083	0.00754028	0.0368204	0.0404117	0.00649666	0.00824479	0.239288	0.244056		372	-0.00327	0	-0.01032	0	-0.00481	0	-0.00968	0	-0.01011	0	-0.0055	0	-0.00332	0
372.2	0.0275778	0.0225839	0.0656953	0.0565373	0.364974	0.370674	1.16289	1.18577	0.819023	0.815804	0.0311829	0.027229	0.126344	0.124567		372.2	0.504998	0.50708	0.0877488	0.0913044	0.00881034	0.00950272	0.00613978	0.00754114	0.0367646	0.0404148	0.00649606	0.00824571	0.240031	0.244057		372.2	-0.00322	0	-0.01028	0	-0.00504	0	-0.0102	0	-0.0107	0	-0.00566	0	-0.00323	0
372.4	0.0277767	0.0226175	0.066086	0.0566197	0.365708	0.37112	1.16311	1.18593	0.819731	0.816418	0.0311484	0.0272694	0.126272	0.124741		372.4	0.504974	0.50708	0.0880519	0.0913073	0.00945052	0.00950367	0.00647342	0.007542	0.0367421	0.0404178	0.00683111	0.00824662	0.240948	0.244057		372.4	-0.00294	0	-0.00992	0	-0.00469	0	-0.01029	0	-0.01055	0	-0.005	0	-0.00281	0
372.6	0.0279796	0.0226511	0.0660216	0.0567022	0.366552	0.371566	1.16338	1.1861	0.820363	0.81703	0.0313139	0.0273097	0.12665	0.124914		372.6	0.505358	0.50708	0.0881973	0.0913101	0.00967483	0.00950463	0.00650691	0.00754286	0.0369951	0.0404209	0.00702455	0.00824753	0.241275	0.244058		372.6	-0.00253	0	-0.00955	0	-0.00462	0	-0.00989	0	-0.01038	0	-0.00466	0	-0.00229	0
372.8	0.0280106	0.0226847	0.0660142	0.0567846	0.366799	0.372012	1.16326	1.18626	0.820531	0.817641	0.0316268	0.02735	0.126973	0.125087		372.8	0.505425	0.50708	0.0878602	0.0913129	0.00964636	0.00950557	0.00631923	0.00754371	0.0368447	0.0404239	0.00691658	0.00824843	0.241691	0.244058		372.8	-0.00284	0	-0.0098	0	-0.0047	0	-0.00977	0	-0.01042	0	-0.00455	0	-0.00239	0
373	0.0278723	0.0227184	0.0661797	0.056867	0.367079	0.372458	1.16344	1.18642	0.82091	0.818252	0.0315404	0.0273903	0.127396	0.125261		373	0.50608	0.50708	0.0877956	0.0913156	0.00954242	0.00950651	0.00656724	0.00754456	0.0368732	0.0404269	0.0066682	0.00824933	0.242028	0.244058		373	-0.00242	0	-0.00991	0	-0.00438	0	-0.00948	0	-0.01023	0	-0.00396	0	-0.00269	0
373.2	0.0282133	0.022752	0.0667983	0.0569494	0.36827	0.372903	1.16377	1.18658	0.82166	0.818861	0.0322408	0.0274306	0.128277	0.125434		373.2	0.505879	0.50708	0.087676	0.0913184	0.00935836	0.00950745	0.00688276	0.0075454	0.0371573	0.0404299	0.00652389	0.00825022	0.242218	0.244059		373.2	-0.00291	0	-0.00968	0	-0.00437	0	-0.00935	0	-0.01011	0	-0.00394	0	-0.00295	0
373.4	0.0281578	0.0227856	0.0668255	0.0570318	0.368862	0.373348	1.16415	1.18674	0.822111	0.819468	0.0324176	0.0274709	0.128714	0.125607		373.4	0.505778	0.50708	0.0875478	0.0913211	0.00936038	0.00950837	0.00689234	0.00754624	0.0374263	0.0404328	0.00687488	0.00825111	0.242221	0.244059		373.4	-0.00305	0	-0.00974	0	-0.00419	0	-0.00951	0	-0.01045	0	-0.00416	0	-0.00284	0
373.6	0.0277957	0.0228192	0.0666462	0.0571142	0.369603	0.373793	1.16428	1.18689	0.822519	0.820075	0.0324356	0.0275113	0.128796	0.12578		373.6	0.50653	0.50708	0.0878479	0.0913238	0.00946541	0.0095093	0.00722222	0.00754707	0.0376121	0.0404357	0.00709605	0.00825199	0.242795	0.24406		373.6	-0.00333	0	-0.00975	0	-0.00422	0	-0.0092	0	-0.01067	0	-0.0044	0	-0.0022	0
373.8	0.0271742	0.0228528	0.0665854	0.0571966	0.369715	0.374237	1.16466	1.18705	0.822703	0.820681	0.0321861	0.0275516	0.12913	0.125953		373.8	0.506492	0.50708	0.0874653	0.0913265	0.00911929	0.00951021	0.00685106	0.0075479	0.0374091	0.0404387	0.00710674	0.00825286	0.242896	0.24406		373.8	-0.00336	0	-0.01002	0	-0.00402	0	-0.00943	0	-0.01055	0	-0.00475	0	-0.00221	0
374	0.0271451	0.0228864	0.066581	0.057279	0.369856	0.374681	1.1649	1.18721	0.822945	0.821285	0.0323161	0.0275919	0.129132	0.126126		374	0.506555	0.50708	0.0871201	0.0913291	0.0088867	0.00951112	0.00657303	0.00754872	0.0375055	0.0404416	0.00689112	0.00825373	0.242507	0.24406		374	-0.00374	0	-0.0102	0	-0.0041	0	-0.00928	0	-0.01049	0	-0.00469	0	-0.00234	0
374.2	0.0271479	0.02292	0.0668165	0.0573613	0.370226	0.375125	1.16544	1.18736	0.823798	0.821888	0.0324396	0.0276322	0.129286	0.126299		374.2	0.506702	0.50708	0.0870188	0.0913318	0.00940747	0.00951203	0.00662671	0.00754953	0.0376946	0.0404444	0.0073351	0.0082546	0.242453	0.244061		374.2	-0.00352	0	-0.01025	0	-0.00386	0	-0.00898	0	-0.0104	0	-0.00511	0	-0.00213	0
374.4	0.0270234	0.0229536	0.0667788	0.0574437	0.370105	0.375568	1.16584	1.18751	0.824509	0.82249	0.0322434	0.0276725	0.129623	0.126472		374.4	0.506468	0.50708	0.0867916	0.0913343	0.00924664	0.00951293	0.00604271	0.00755034	0.0379126	0.0404473	0.00699597	0.00825546	0.242739	0.244061		374.4	-0.00378	0	-0.0101	0	-0.00391	0	-0.00868	0	-0.00994	0	-0.00511	0	-0.00208	0
374.6	0.0268174	0.0229872	0.0667254	0.057526	0.370399	0.376011	1.166	1.18767	0.825054	0.823091	0.0321338	0.0277128	0.129812	0.126645		374.6	0.506818	0.50708	0.08679	0.0913369	0.00931588	0.00951382	0.00597246	0.00755115	0.0375478	0.0404501	0.00688439	0.00825631	0.242414	0.244062		374.6	-0.00332	0	-0.01016	0	-0.00346	0	-0.00799	0	-0.00943	0	-0.00491	0	-0.00178	0
374.8	0.0273975	0.0230208	0.0666931	0.0576084	0.371364	0.376454	1.16685	1.18782	0.826005	0.823691	0.0325297	0.0277531	0.130198	0.126818		374.8	0.506903	0.50708	0.0862894	0.0913395	0.00928825	0.00951471	0.00560386	0.00755195	0.0369862	0.040453	0.00696732	0.00825716	0.242449	0.244062		374.8	-0.00333	0	-0.01063	0	-0.00356	0	-0.00821	0	-0.00951	0	-0.00518	0	-0.00207	0
375	0.0269947	0.0230544	0.0664253	0.0576907	0.371886	0.376897	1.16723	1.18797	0.826812	0.82429	0.0323516	0.0277933	0.130198	0.12699		375	0.507023	0.50708	0.0864103	0.091342	0.0091132	0.00951559	0.00542133	0.00755275	0.0362329	0.0404557	0.00649419	0.00825801	0.241381	0.244062		375	-0.00335	0	-0.01093	0	-0.00319	0	-0.0082	0	-0.00946	0	-0.00491	0	-0.00137	0
375.2	0.026619	0.023088	0.0669599	0.057773	0.372108	0.377339	1.16766	1.18812	0.827273	0.824887	0.0322427	0.0278336	0.13013	0.127163		375.2	0.506605	0.50708	0.0862748	0.0913446	0.00889601	0.00951647	0.00519174	0.00755354	0.035388	0.0404585	0.00595344	0.00825884	0.240727	0.244063		375.2	-0.00375	0	-0.01122	0	-0.00342	0	-0.00767	0	-0.00954	0	-0.005	0	-0.00115	0
375.4	0.0268447	0.0231216	0.0673623	0.0578553	0.372873	0.377781	1.16818	1.18827	0.828066	0.825483	0.0319733	0.0278739	0.130164	0.127336		375.4	0.506724	0.50708	0.0863434	0.0913471	0.00954261	0.00951734	0.00563649	0.00755433	0.0355402	0.0404613	0.006418	0.00825968	0.240608	0.244063		375.4	-0.00283	0	-0.01093	0	-0.0032	0	-0.00733	0	-0.0096	0	-0.00462	0	-0.0007	0
375.6	0.0274855	0.0231552	0.0680392	0.0579376	0.373808	0.378223	1.16848	1.18842	0.828863	0.826079	0.0318258	0.0279142	0.130381	0.127508		375.6	0.506435	0.50708	0.0864184	0.0913495	0.00938933	0.00951821	0.00558478	0.00755511	0.0355216	0.040464	0.00593165	0.00826051	0.240525	0.244063		375.6	-0.00284	0	-0.01102	0	-0.00323	0	-0.00778	0	-0.00992	0	-0.00448	0	-0.00098	0
375.8	0.0276775	0.0231888	0.0684198	0.0580199	0.374405	0.378664	1.16845	1.18857	0.829802	0.826673	0.0316387	0.0279545	0.130231	0.127681		375.8	0.505983	0.50708	0.0867535	0.091352	0.00943182	0.00951907	0.00561985	0.00755589	0.035853	0.0404668	0.00541798	0.00826133	0.240387	0.244064		375.8	-0.00245	0	-0.01105	0	-0.00373	0	-0.00827	0	-0.0101	0	-0.00499	0	-0.00107	0
376	0.0282369	0.0232223	0.0688549	0.0581022	0.37535	0.379105	1.16941	1.18872	0.830923	0.827266	0.031651	0.0279947	0.130823	0.127854		376	0.505546	0.50708	0.0865896	0.0913544	0.00909132	0.00951993	0.00612419	0.00755666	0.0355229	0.0404694	0.00523016	0.00826215	0.239902	0.244064		376	-0.00258	0	-0.0111	0	-0.00396	0	-0.00848	0	-0.0106	0	-0.00514	0	-0.00119	0
376.2	0.0290376	0.0232559	0.0688008	0.0581845	0.376105	0.379546	1.16979	1.18886	0.831632	0.827857	0.0318774	0.028035	0.131525	0.128026		376.2	0.50611	0.50708	0.0868325	0.0913569	0.00944024	0.00952078	0.00585019	0.00755743	0.035502	0.0404721	0.00504118	0.00826296	0.239853	0.244064		376.2	-0.0024	0	-0.011	0	-0.0042	0	-0.00857	0	-0.01035	0	-0.00519	0	-0.00134	0
376.4	0.029373	0.0232895	0.0689609	0.0582667	0.377017	0.379987	1.16972	1.18901	0.832388	0.828448	0.0322023	0.0280753	0.131931	0.128199		376.4	0.505628	0.50708	0.0869715	0.0913592	0.0093329	0.00952162	0.00604515	0.0075582	0.03561	0.0404748	0.00472875	0.00826377	0.239066	0.244065		376.4	-0.0018	0	-0.01054	0	-0.00383	0	-0.00811	0	-0.0099	0	-0.00462	0	-0.00081	0
376.6	0.0296749	0.0233231	0.0691575	0.058349	0.377782	0.380427	1.17026	1.18915	0.833079	0.829038	0.0326061	0.0281156	0.132308	0.128371		376.6	0.505871	0.50708	0.0868695	0.0913616	0.00903841	0.00952246	0.00627552	0.00755896	0.0360179	0.0404775	0.00511108	0.00826458	0.239069	0.244065		376.6	-0.00188	0	-0.01077	0	-0.00376	0	-0.00797	0	-0.00985	0	-0.00437	0	-0.00044	0
376.8	0.0301351	0.0233567	0.0694585	0.0584312	0.378252	0.380867	1.1706	1.1893	0.834067	0.829626	0.0330738	0.0281558	0.132837	0.128544		376.8	0.505721	0.50708	0.0870138	0.091364	0.0087423	0.0095233	0.00635576	0.00755971	0.0361863	0.0404801	0.00530111	0.00826537	0.238806	0.244065		376.8	-0.00164	0	-0.01122	0	-0.00382	0	-0.00829	0	-0.01	0	-0.00453	0	-0.00091	0
377	0.0301352	0.0233903	0.0695873	0.0585135	0.379345	0.381307	1.1711	1.18944	0.835252	0.830213	0.0330992	0.0281961	0.133173	0.128716		377	0.506009	0.50708	0.0872151	0.0913663	0.00864347	0.00952413	0.00663397	0.00756046	0.0362825	0.0404827	0.00535425	0.00826617	0.23881	0.244066		377	-0.0013	0	-0.01091	0	-0.00384	0	-0.00807	0	-0.00984	0	-0.00422	0	-0.00116	0
377.2	0.0309382	0.0234238	0.0705787	0.0585957	0.380491	0.381746	1.17172	1.18958	0.836297	0.830799	0.0336021	0.0282364	0.133693	0.128888		377.2	0.506368	0.50708	0.087517	0.0913686	0.00892275	0.00952495	0.00683494	0.00756121	0.0368413	0.0404853	0.00600445	0.00826696	0.239565	0.244066		377.2	-0.00141	0	-0.01044	0	-0.00406	0	-0.00833	0	-0.00987	0	-0.00469	0	-0.00101	0
377.4	0.0308881	0.0234574	0.0703419	0.0586779	0.380789	0.382185	1.17192	1.18972	0.836531	0.831384	0.0335877	0.0282766	0.133477	0.12906		377.4	0.50686	0.50708	0.0875827	0.0913709	0.00902006	0.00952577	0.00703413	0.00756195	0.0374722	0.0404879	0.00629927	0.00826774	0.239467	0.244066		377.4	-0.00124	0	-0.01039	0	-0.00428	0	-0.00855	0	-0.01002	0	-0.00486	0	-0.00033	0
377.6	0.0309169	0.023491	0.0701014	0.0587601	0.380748	0.382624	1.17198	1.18987	0.837169	0.831968	0.0338717	0.0283169	0.133662	0.129233		377.6	0.507126	0.50708	0.0875638	0.0913732	0.00881181	0.00952658	0.00688209	0.00756269	0.0376865	0.0404904	0.00630363	0.00826852	0.239597	0.244067		377.6	-0.00093	0	-0.0101	0	-0.00405	0	-0.00874	0	-0.00977	0	-0.00455	0	-0.00077	0
377.8	0.0310114	0.0235246	0.0699808	0.0588423	0.380942	0.383062	1.17224	1.19001	0.837444	0.832551	0.0334931	0.0283571	0.133783	0.129405		377.8	0.506848	0.50708	0.0874585	0.0913754	0.00924828	0.00952739	0.00686476	0.00756342	0.03809	0.040493	0.006558	0.0082693	0.240031	0.244067		377.8	-0.00092	0	-0.01002	0	-0.00404	0	-0.00921	0	-0.00971	0	-0.00453	0	-0.00122	0
378	0.0314465	0.0235581	0.0697272	0.0589245	0.381021	0.383501	1.17209	1.19014	0.838166	0.833133	0.033804	0.0283974	0.133794	0.129577		378	0.506816	0.50708	0.0878393	0.0913777	0.00922246	0.0095282	0.00648406	0.00756415	0.0385016	0.0404955	0.00661471	0.00827007	0.240107	0.244067		378	-0.00084	0	-0.00985	0	-0.00407	0	-0.00953	0	-0.00927	0	-0.00437	0	-0.00136	0
378.2	0.0317117	0.0235917	0.0699671	0.0590067	0.381068	0.383938	1.17237	1.19028	0.83914	0.833713	0.0337063	0.0284376	0.133937	0.129749		378.2	0.506753	0.50708	0.0881449	0.0913799	0.00939694	0.00952899	0.00641578	0.00756487	0.0389819	0.040498	0.00741411	0.00827083	0.240511	0.244068		378.2	-0.00034	0	-0.00937	0	-0.00397	0	-0.00975	0	-0.00929	0	-0.0047	0	-0.00094	0
378.4	0.0314871	0.0236253	0.0697118	0.0590889	0.380196	0.384376	1.17206	1.19042	0.839404	0.834293	0.0338685	0.0284779	0.134089	0.129921		378.4	0.506563	0.50708	0.0883492	0.0913821	0.00941103	0.00952979	0.00615002	0.00756559	0.0391426	0.0405005	0.00763829	0.00827159	0.24032	0.244068		378.4	-9.3e-05	0	-0.0091	0	-0.00395	0	-0.00925	0	-0.00899	0	-0.00398	0	-0.00093	0
378.6	0.0317292	0.0236588	0.0698729	0.059171	0.380773	0.384813	1.17185	1.19056	0.839732	0.834871	0.0341735	0.0285181	0.13426	0.130093		378.6	0.507001	0.50708	0.0885446	0.0913843	0.00951599	0.00953058	0.0060217	0.00756631	0.0383556	0.040503	0.00789895	0.00827235	0.240004	0.244068		378.6	0.000964	0	-0.00881	0	-0.00277	0	-0.00875	0	-0.00832	0	-0.00339	0	-0.00064	0
378.8	0.0318999	0.0236924	0.0695665	0.0592532	0.381475	0.38525	1.17175	1.19069	0.840282	0.835449	0.0344526	0.0285584	0.134351	0.130265		378.8	0.506648	0.50708	0.0881866	0.0913865	0.00921041	0.00953136	0.00536855	0.00756702	0.0380755	0.0405054	0.00784254	0.0082731	0.239583	0.244069		378.8	0.000451	0	-0.00903	0	-0.00309	0	-0.00918	0	-0.00885	0	-0.00348	0	-0.00103	0
379	0.0317506	0.023726	0.0699154	0.0593353	0.381715	0.385687	1.17184	1.19083	0.840751	0.836025	0.0345652	0.0285986	0.134392	0.130437		379	0.506563	0.50708	0.088487	0.0913886	0.00915315	0.00953214	0.00564124	0.00756772	0.0375928	0.0405079	0.00748772	0.00827385	0.239418	0.244069		379	-4.3e-05	0	-0.00894	0	-0.00356	0	-0.00921	0	-0.00933	0	-0.00341	0	-0.00094	0
379.2	0.031665	0.0237595	0.0700224	0.0594175	0.381787	0.386124	1.17169	1.19096	0.841267	0.8366	0.0349515	0.0286389	0.13459	0.130609		379.2	0.506541	0.50708	0.0886918	0.0913907	0.00913594	0.00953291	0.0058719	0.00756843	0.0372772	0.0405103	0.00763961	0.00827459	0.239617	0.244069		379.2	4.69e-05	0	-0.00892	0	-0.00368	0	-0.00904	0	-0.00959	0	-0.00323	0	-0.00121	0
379.4	0.0312842	0.0237931	0.0703025	0.0594996	0.382325	0.38656	1.17169	1.1911	0.841582	0.837174	0.0351325	0.0286791	0.134434	0.130781		379.4	0.506685	0.50708	0.0885737	0.0913928	0.00909891	0.00953368	0.0059481	0.00756912	0.0373168	0.0405127	0.00771678	0.00827533	0.240014	0.244069		379.4	0.000117	0	-0.00838	0	-0.00359	0	-0.00933	0	-0.00993	0	-0.0031	0	-0.00139	0
379.6	0.0315271	0.0238267	0.0707965	0.0595817	0.382609	0.386996	1.17185	1.19123	0.842221	0.837747	0.0350262	0.0287193	0.134809	0.130953		379.6	0.506501	0.50708	0.0888169	0.0913949	0.00847331	0.00953445	0.0057322	0.00756982	0.0373006	0.0405151	0.00720851	0.00827606	0.239911	0.24407		379.6	-0.00078	0	-0.0096	0	-0.00443	0	-0.00984	0	-0.01091	0	-0.00413	0	-0.003	0
379.8	0.0313375	0.0238602	0.0708739	0.0596638	0.382778	0.387431	1.17151	1.19136	0.842884	0.838318	0.034862	0.0287595	0.135317	0.131124		379.8	0.506223	0.50708	0.0888593	0.091397	0.00852838	0.00953521	0.00546894	0.00757051	0.0368274	0.0405175	0.0064925	0.00827679	0.239527	0.24407		379.8	-0.00079	0	-0.00969	0	-0.00453	0	-0.00969	0	-0.01085	0	-0.00441	0	-0.00293	0
380	0.0311964	0.0238938	0.0711018	0.0597459	0.383372	0.387866	1.1718	1.19149	0.842688	0.838889	0.0346502	0.0287998	0.135885	0.131296		380	0.506199	0.50708	0.088703	0.0913991	0.00860177	0.00953596	0.00526888	0.00757119	0.0368636	0.0405198	0.00618533	0.00827752	0.239273	0.24407		380	-0.00133	0	-0.00971	0	-0.00486	0	-0.00986	0	-0.0107	0	-0.00415	0	-0.00309	0
380.2	0.0308467	0.0239273	0.0710551	0.059828	0.383494	0.388302	1.17145	1.19162	0.842805	0.839459	0.0346516	0.02884	0.13625	0.131468		380.2	0.506564	0.50708	0.0890556	0.0914011	0.00895141	0.00953671	0.00510872	0.00757188	0.036988	0.0405222	0.006511	0.00827824	0.238817	0.24407		380.2	-0.00186	0	-0.01022	0	-0.00517	0	-0.00987	0	-0.01078	0	-0.00466	0	-0.00345	0
380.4	0.030535	0.0239609	0.071787	0.0599101	0.384228	0.388736	1.17158	1.19175	0.843915	0.840027	0.0349796	0.0288802	0.136618	0.131639		380.4	0.506435	0.50708	0.0892151	0.0914031	0.00850302	0.00953746	0.0056412	0.00757255	0.0368416	0.0405245	0.00641705	0.00827896	0.238559	0.244071		380.4	-0.00176	0	-0.01028	0	-0.00476	0	-0.0093	0	-0.01089	0	-0.00407	0	-0.00318	0
380.6	0.0306515	0.0239944	0.0723984	0.0599922	0.384966	0.389171	1.17227	1.19188	0.845092	0.840594	0.0348461	0.0289204	0.137093	0.131811		380.6	0.506873	0.50708	0.0893071	0.0914051	0.00903838	0.0095382	0.00537043	0.00757323	0.0363612	0.0405268	0.00660556	0.00827967	0.23877	0.244071		380.6	-0.00188	0	-0.0108	0	-0.00486	0	-0.00928	0	-0.01084	0	-0.00419	0	-0.00314	0
380.8	0.0306126	0.024028	0.072622	0.0600743	0.385752	0.389605	1.17292	1.19201	0.846082	0.841161	0.0350299	0.0289607	0.137658	0.131983		380.8	0.506604	0.50708	0.0887548	0.0914071	0.00912843	0.00953893	0.00511557	0.0075739	0.0360666	0.0405291	0.00618573	0.00828037	0.238235	0.244071		380.8	-0.00188	0	-0.01097	0	-0.00483	0	-0.00865	0	-0.01096	0	-0.00471	0	-0.00327	0
381	0.030302	0.0240615	0.0727258	0.0601563	0.386484	0.390039	1.17346	1.19214	0.846405	0.841726	0.0346518	0.0290009	0.137753	0.132154		381	0.506956	0.50708	0.0884025	0.0914091	0.00939198	0.00953966	0.00569306	0.00757456	0.0356442	0.0405314	0.00594242	0.00828108	0.238815	0.244071		381	-0.00245	0	-0.01087	0	-0.00473	0	-0.00841	0	-0.01065	0	-0.00495	0	-0.00314	0
381.2	0.0304985	0.024095	0.0728487	0.0602384	0.38696	0.390472	1.17374	1.19227	0.846927	0.84229	0.0347242	0.0290411	0.138185	0.132326		381.2	0.507099	0.50708	0.0876815	0.091411	0.00967294	0.00954039	0.00568253	0.00757522	0.0358293	0.0405337	0.00583328	0.00828178	0.239487	0.244072		381.2	-0.00216	0	-0.01087	0	-0.00449	0	-0.00824	0	-0.01044	0	-0.00501	0	-0.00265	0
381.4	0.0297828	0.0241286	0.0719392	0.0603204	0.386854	0.390905	1.17357	1.19239	0.84661	0.842853	0.034228	0.0290813	0.137444	0.132497		381.4	0.506756	0.50708	0.0871169	0.091413	0.0098346	0.00954111	0.00576219	0.00757588	0.0357153	0.0405359	0.00549989	0.00828247	0.239296	0.244072		381.4	-0.00185	0	-0.01064	0	-0.00427	0	-0.00795	0	-0.01039	0	-0.0046	0	-0.00222	0
381.6	0.0295866	0.0241621	0.0714179	0.0604024	0.387163	0.391338	1.17404	1.19252	0.847406	0.843415	0.0342889	0.0291215	0.13747	0.132668		381.6	0.506855	0.50708	0.087104	0.0914149	0.0100911	0.00954183	0.00618644	0.00757653	0.035728	0.0405381	0.00541107	0.00828316	0.239635	0.244072		381.6	-0.00166	0	-0.01072	0	-0.00403	0	-0.00812	0	-0.01025	0	-0.00435	0	-0.0022	0
381.8	0.0301342	0.0241957	0.0713961	0.0604844	0.388001	0.391771	1.17484	1.19264	0.848051	0.843976	0.0343525	0.0291617	0.137449	0.13284		381.8	0.506754	0.50708	0.0867406	0.0914168	0.00988317	0.00954255	0.00606801	0.00757718	0.0355984	0.0405404	0.00566679	0.00828385	0.239719	0.244072		381.8	-0.00176	0	-0.01063	0	-0.00384	0	-0.00815	0	-0.01022	0	-0.00419	0	-0.0019	0
382	0.0305699	0.0242292	0.0713676	0.0605665	0.388223	0.392204	1.17507	1.19277	0.848405	0.844536	0.0342765	0.0292019	0.137415	0.133011		382	0.506721	0.50708	0.0869185	0.0914187	0.0100404	0.00954325	0.00624421	0.00757783	0.0358993	0.0405426	0.00617574	0.00828453	0.239546	0.244073		382	-0.00164	0	-0.01064	0	-0.00357	0	-0.00817	0	-0.00984	0	-0.00398	0	-0.00146	0
382.2	0.0303759	0.0242627	0.0709769	0.0606484	0.388245	0.392636	1.17477	1.19289	0.849003	0.845095	0.0343307	0.0292421	0.136994	0.133182		382.2	0.506901	0.50708	0.0871075	0.0914206	0.0107434	0.00954396	0.00686074	0.00757847	0.0364658	0.0405447	0.00685064	0.00828521	0.239811	0.244073		382.2	-0.00197	0	-0.01058	0	-0.00397	0	-0.00834	0	-0.01038	0	-0.00437	0	-0.00151	0
382.4	0.0302037	0.0242963	0.0707436	0.0607304	0.388212	0.393068	1.17439	1.19302	0.849241	0.845653	0.0344154	0.0292823	0.136466	0.133353		382.4	0.506479	0.50708	0.0867086	0.0914224	0.0109087	0.00954466	0.00673552	0.00757911	0.0364772	0.0405469	0.00681297	0.00828588	0.239506	0.244073		382.4	-0.00179	0	-0.01045	0	-0.00379	0	-0.00805	0	-0.01039	0	-0.00391	0	-0.00165	0
382.6	0.0306768	0.0243298	0.0702375	0.0608124	0.388798	0.393499	1.17434	1.19314	0.849548	0.846209	0.034422	0.0293225	0.136272	0.133525		382.6	0.506755	0.50708	0.0865396	0.0914243	0.0107621	0.00954536	0.00700054	0.00757974	0.0360075	0.0405491	0.00650158	0.00828655	0.239334	0.244073		382.6	-0.00166	0	-0.01042	0	-0.00351	0	-0.008	0	-0.01031	0	-0.00414	0	-0.00155	0
382.8	0.0309838	0.0243634	0.0701123	0.0608944	0.389201	0.39393	1.17441	1.19326	0.849754	0.846765	0.0348507	0.0293627	0.136169	0.133696		382.8	0.506366	0.50708	0.0861135	0.0914261	0.0101796	0.00954605	0.00671345	0.00758037	0.0361276	0.0405512	0.00646805	0.00828722	0.238864	0.244074		382.8	-0.00222	0	-0.01075	0	-0.00414	0	-0.00827	0	-0.01101	0	-0.00451	0	-0.00166	0
383	0.0309914	0.0243969	0.0696247	0.0609764	0.389349	0.394361	1.17434	1.19338	0.849996	0.847319	0.0349834	0.0294029	0.135993	0.133867		383	0.507185	0.50708	0.0867262	0.0914279	0.0103741	0.00954673	0.0070426	0.007581	0.0362859	0.0405534	0.00693456	0.00828788	0.239717	0.244074		383	-0.0025	0	-0.0108	0	-0.00478	0	-0.00848	0	-0.01116	0	-0.00476	0	-0.00229	0
383.2	0.0307933	0.0244304	0.0692703	0.0610583	0.389459	0.394792	1.17417	1.1935	0.85011	0.847873	0.0346149	0.029443	0.135669	0.134038		383.2	0.507114	0.50708	0.0865039	0.0914297	0.00995102	0.00954742	0.00704412	0.00758162	0.0363482	0.0405555	0.00695781	0.00828854	0.239867	0.244074		383.2	-0.00237	0	-0.01119	0	-0.0049	0	-0.00913	0	-0.01128	0	-0.00469	0	-0.00259	0
383.4	0.0303272	0.0244639	0.0695647	0.0611403	0.390122	0.395222	1.17429	1.19362	0.850242	0.848425	0.0344301	0.0294832	0.135641	0.134209		383.4	0.507802	0.50708	0.0866583	0.0914315	0.0102723	0.0095481	0.00717219	0.00758224	0.0367719	0.0405576	0.00705866	0.00828919	0.240902	0.244074		383.4	-0.00269	0	-0.01091	0	-0.00471	0	-0.0091	0	-0.01139	0	-0.00469	0	-0.00281	0
383.6	0.0304685	0.0244975	0.0692724	0.0612222	0.390284	0.395653	1.17425	1.19374	0.850184	0.848977	0.0335814	0.0295234	0.135418	0.13438		383.6	0.508074	0.50708	0.0868579	0.0914332	0.0100829	0.00954877	0.00681171	0.00758286	0.0371713	0.0405597	0.00730207	0.00828984	0.240784	0.244074		383.6	-0.00271	0	-0.01167	0	-0.00466	0	-0.00938	0	-0.01112	0	-0.00495	0	-0.00327	0
383.8	0.0302454	0.024531	0.0695758	0.0613041	0.390837	0.396082	1.17375	1.19386	0.850363	0.849527	0.0333711	0.0295636	0.135414	0.134551		383.8	0.508504	0.50708	0.0869786	0.091435	0.0103087	0.00954944	0.00677528	0.00758347	0.0372647	0.0405617	0.00683802	0.00829049	0.240922	0.244075		383.8	-0.00245	0	-0.01129	0	-0.00419	0	-0.00916	0	-0.00984	0	-0.00439	0	-0.00266	0
384	0.0297185	0.0245645	0.0699401	0.061386	0.390641	0.396512	1.17344	1.19397	0.850231	0.850076	0.0329126	0.0296038	0.135102	0.134721		384	0.508574	0.50708	0.0870884	0.0914367	0.0101808	0.00955011	0.00649943	0.00758408	0.0379082	0.0405638	0.00733328	0.00829113	0.240672	0.244075		384	-0.00276	0	-0.01145	0	-0.00429	0	-0.00941	0	-0.00966	0	-0.00403	0	-0.00278	0
384.2	0.0295798	0.024598	0.0703838	0.061468	0.390766	0.396941	1.17331	1.19409	0.851629	0.850624	0.0328844	0.0296439	0.135296	0.134892		384.2	0.508994	0.50708	0.0873942	0.0914384	0.0105547	0.00955077	0.00654297	0.00758468	0.0376622	0.0405658	0.00811129	0.00829177	0.240535	0.244075		384.2	-0.00294	0	-0.01196	0	-0.00478	0	-0.00943	0	-0.01015	0	-0.00411	0	-0.00331	0
384.4	0.0296884	0.0246315	0.0706068	0.0615499	0.390972	0.39737	1.17342	1.19421	0.852398	0.851172	0.0328363	0.0296841	0.135526	0.135063		384.4	0.509218	0.50708	0.0877165	0.0914401	0.0105128	0.00955142	0.00665463	0.00758528	0.0379935	0.0405679	0.00834582	0.0082924	0.240917	0.244075		384.4	-0.00255	0	-0.01178	0	-0.00454	0	-0.00934	0	-0.00965	0	-0.00391	0	-0.00296	0
384.6	0.02984	0.0246651	0.0709315	0.0616317	0.391519	0.397799	1.17366	1.19432	0.852977	0.851718	0.0329551	0.0297243	0.135772	0.135234		384.6	0.509162	0.50708	0.0878928	0.0914418	0.0106118	0.00955208	0.00584537	0.00758588	0.0377949	0.0405699	0.00805517	0.00829303	0.241176	0.244075		384.6	-0.00242	0	-0.01228	0	-0.00457	0	-0.0095	0	-0.00995	0	-0.00405	0	-0.00319	0
384.8	0.0296064	0.0246986	0.070934	0.0617136	0.391734	0.398227	1.174	1.19444	0.853186	0.852263	0.0330881	0.0297644	0.135862	0.135405		384.8	0.509345	0.50708	0.0879036	0.0914435	0.0105214	0.00955273	0.00602804	0.00758647	0.0378909	0.0405719	0.00788708	0.00829366	0.241201	0.244076		384.8	-0.00262	0	-0.01242	0	-0.00395	0	-0.00916	0	-0.01011	0	-0.00406	0	-0.0032	0
385	0.0294756	0.0247321	0.070977	0.0617955	0.391842	0.398655	1.17458	1.19455	0.853776	0.852807	0.0327092	0.0298046	0.136093	0.135575		385	0.508971	0.50708	0.0878346	0.0914452	0.0101552	0.00955337	0.00596174	0.00758706	0.0377028	0.0405739	0.00825116	0.00829428	0.241514	0.244076		385	-0.00278	0	-0.01239	0	-0.00395	0	-0.00938	0	-0.00992	0	-0.00458	0	-0.00268	0
385.2	0.0294105	0.0247656	0.0710996	0.0618774	0.392409	0.399083	1.17472	1.19467	0.854293	0.85335	0.0328453	0.0298447	0.136425	0.135746		385.2	0.508682	0.50708	0.0878457	0.0914468	0.0106264	0.00955401	0.00567938	0.00758765	0.0378137	0.0405758	0.00793768	0.0082949	0.24181	0.244076		385.2	-0.00235	0	-0.01217	0	-0.00375	0	-0.00871	0	-0.00995	0	-0.00479	0	-0.00247	0
385.4	0.0291462	0.0247991	0.0710435	0.0619592	0.39263	0.399511	1.17466	1.19478	0.854395	0.853892	0.03238	0.0298849	0.13641	0.135916		385.4	0.508693	0.50708	0.0888686	0.0914485	0.0110344	0.00955465	0.0061972	0.00758823	0.0377323	0.0405778	0.00815387	0.00829551	0.242439	0.244076		385.4	-0.00219	0	-0.01221	0	-0.00384	0	-0.00899	0	-0.01027	0	-0.00456	0	-0.00272	0
385.6	0.0298036	0.0248326	0.071298	0.0620411	0.39332	0.399938	1.17564	1.19489	0.855683	0.854433	0.0326685	0.0299251	0.137297	0.136087		385.6	0.508697	0.50708	0.0895452	0.0914501	0.0107416	0.00955529	0.00631057	0.00758881	0.0378659	0.0405798	0.00828855	0.00829613	0.242365	0.244076		385.6	-0.00205	0	-0.01271	0	-0.00389	0	-0.00903	0	-0.01024	0	-0.00508	0	-0.00269	0
385.8	0.0303668	0.0248661	0.0715681	0.0621229	0.394027	0.400365	1.17621	1.195	0.856277	0.854973	0.0330875	0.0299652	0.137719	0.136257		385.8	0.508181	0.50708	0.0895082	0.0914517	0.0104722	0.00955591	0.00619803	0.00758938	0.0379289	0.0405817	0.00821242	0.00829673	0.242542	0.244076		385.8	-0.00224	0	-0.01253	0	-0.00396	0	-0.00925	0	-0.01026	0	-0.0056	0	-0.00308	0
386	0.0303064	0.0248996	0.0721202	0.0622048	0.39444	0.400792	1.17655	1.19511	0.856849	0.855511	0.0332102	0.0300054	0.138277	0.136428		386	0.508248	0.50708	0.0903503	0.0914533	0.0111941	0.00955654	0.00689518	0.00758996	0.0385172	0.0405836	0.0083934	0.00829734	0.242864	0.244077		386	-0.00205	0	-0.0122	0	-0.00373	0	-0.00905	0	-0.01005	0	-0.00562	0	-0.00287	0
386.2	0.0303339	0.0249332	0.0722592	0.0622866	0.39468	0.401218	1.17679	1.19522	0.857802	0.856049	0.0336264	0.0300455	0.138672	0.136598		386.2	0.507871	0.50708	0.0902318	0.0914549	0.0108094	0.00955716	0.00710688	0.00759053	0.0387977	0.0405855	0.00778289	0.00829794	0.243067	0.244077		386.2	-0.00196	0	-0.01194	0	-0.00393	0	-0.00914	0	-0.01021	0	-0.00612	0	-0.0032	0
386.4	0.0308917	0.0249666	0.072325	0.0623684	0.395369	0.401644	1.17752	1.19533	0.857992	0.856586	0.0335732	0.0300856	0.138946	0.136769		386.4	0.507342	0.50708	0.0900667	0.0914564	0.010556	0.00955778	0.0073648	0.00759109	0.0386027	0.0405874	0.00744781	0.00829853	0.242628	0.244077		386.4	-0.00129	0	-0.01127	0	-0.00371	0	-0.00849	0	-0.00995	0	-0.00543	0	-0.00257	0
386.6	0.031205	0.0250001	0.071944	0.0624502	0.395599	0.40207	1.17797	1.19544	0.85815	0.857122	0.0337151	0.0301258	0.139407	0.136939		386.6	0.507589	0.50708	0.0903416	0.091458	0.0104477	0.00955839	0.00783507	0.00759165	0.0386003	0.0405893	0.00708552	0.00829913	0.242829	0.244077		386.6	-0.00116	0	-0.01098	0	-0.00388	0	-0.00837	0	-0.01013	0	-0.00578	0	-0.0023	0
386.8	0.0314687	0.0250337	0.0721565	0.062532	0.396259	0.402496	1.17828	1.19555	0.858363	0.857657	0.033806	0.0301659	0.139483	0.137109		386.8	0.507159	0.50708	0.0899806	0.0914595	0.00992528	0.009559	0.00758442	0.00759221	0.0384847	0.0405912	0.00653299	0.00829972	0.242866	0.244077		386.8	-0.0009	0	-0.0105	0	-0.00385	0	-0.00824	0	-0.01015	0	-0.00575	0	-0.00193	0
387	0.0312026	0.0250671	0.0721082	0.0626138	0.396695	0.402921	1.17863	1.19566	0.858502	0.85819	0.0336735	0.0302061	0.139414	0.137279		387	0.507089	0.50708	0.0898403	0.0914611	0.00961987	0.00955961	0.00755235	0.00759277	0.0379953	0.040593	0.00602134	0.0083003	0.243274	0.244078		387	-0.00069	0	-0.00999	0	-0.004	0	-0.00856	0	-0.01023	0	-0.00559	0	-0.00193	0
387.2	0.0312851	0.0251006	0.0725935	0.0626955	0.397662	0.403346	1.1791	1.19577	0.85892	0.858723	0.0335143	0.0302462	0.139788	0.13745		387.2	0.507	0.50708	0.0891452	0.0914626	0.00931476	0.00956021	0.00758747	0.00759332	0.0374594	0.0405949	0.00518248	0.00830088	0.242891	0.244078		387.2	-0.00094	0	-0.00999	0	-0.0043	0	-0.00935	0	-0.01083	0	-0.00579	0	-0.00188	0
387.4	0.0308268	0.0251341	0.0731335	0.0627773	0.398673	0.403771	1.17911	1.19587	0.860022	0.859255	0.0338929	0.0302863	0.139927	0.13762		387.4	0.507509	0.50708	0.0887405	0.0914641	0.00965689	0.00956081	0.00741348	0.00759387	0.0375047	0.0405967	0.00490179	0.00830146	0.242966	0.244078		387.4	-0.00156	0	-0.00998	0	-0.00406	0	-0.00915	0	-0.01054	0	-0.00601	0	-0.00192	0
387.6	0.03071	0.0251676	0.0729545	0.0628591	0.398957	0.404195	1.1791	1.19598	0.86037	0.859785	0.0335634	0.0303265	0.139606	0.13779		387.6	0.507826	0.50708	0.0885075	0.0914656	0.00901996	0.00956141	0.00683222	0.00759441	0.037443	0.0405985	0.00459816	0.00830204	0.242303	0.244078		387.6	-0.00188	0	-0.01012	0	-0.00408	0	-0.00905	0	-0.00999	0	-0.00588	0	-0.00197	0
387.8	0.0309844	0.0252011	0.0733996	0.0629408	0.399933	0.404619	1.17922	1.19608	0.860919	0.860315	0.0338247	0.0303666	0.140108	0.13796		387.8	0.507904	0.50708	0.0879499	0.091467	0.0089074	0.009562	0.00708865	0.00759496	0.0374066	0.0406003	0.00427962	0.00830261	0.242309	0.244078		387.8	-0.00219	0	-0.00971	0	-0.00418	0	-0.00879	0	-0.00965	0	-0.00534	0	-0.00159	0
388	0.030945	0.0252346	0.0732373	0.0630225	0.400242	0.405043	1.17908	1.19619	0.861128	0.860844	0.0338274	0.0304067	0.140218	0.13813		388	0.50767	0.50708	0.0876148	0.0914685	0.0089528	0.00956258	0.00647105	0.0075955	0.0368808	0.0406021	0.00485997	0.00830318	0.241794	0.244078		388	-0.00223	0	-0.0101	0	-0.00458	0	-0.00903	0	-0.01014	0	-0.00487	0	-0.00132	0
388.2	0.0309144	0.0252681	0.0731009	0.0631043	0.40034	0.405467	1.17909	1.19629	0.861386	0.861371	0.0338032	0.0304468	0.140147	0.1383		388.2	0.507729	0.50708	0.0874523	0.0914699	0.00876349	0.00956317	0.00638284	0.00759603	0.0366134	0.0406039	0.00484999	0.00830374	0.24134	0.244078		388.2	-0.00301	0	-0.01082	0	-0.00572	0	-0.00979	0	-0.0108	0	-0.00526	0	-0.00162	0
388.4	0.0309041	0.0253016	0.0733018	0.063186	0.400635	0.40589	1.17969	1.1964	0.861674	0.861898	0.0338467	0.0304869	0.140448	0.13847		388.4	0.507685	0.50708	0.0872386	0.0914714	0.00838273	0.00956375	0.00632514	0.00759656	0.0366371	0.0406057	0.00451818	0.00830431	0.240823	0.244079		388.4	-0.003	0	-0.01085	0	-0.00562	0	-0.00986	0	-0.01037	0	-0.00509	0	-0.00138	0
388.6	0.0310735	0.0253351	0.0736097	0.0632677	0.401092	0.406313	1.17996	1.1965	0.862441	0.862424	0.0339301	0.0305271	0.140422	0.13864		388.6	0.50808	0.50708	0.0872293	0.0914728	0.00838564	0.00956432	0.00573387	0.00759709	0.0367999	0.0406075	0.00472962	0.00830486	0.240612	0.244079		388.6	-0.00327	0	-0.01128	0	-0.00556	0	-0.0097	0	-0.01094	0	-0.00468	0	-0.0017	0
388.8	0.0308481	0.0253686	0.0736356	0.0633494	0.401251	0.406736	1.18027	1.1966	0.863233	0.862948	0.0339389	0.0305672	0.14044	0.138809		388.8	0.50834	0.50708	0.0870728	0.0914742	0.00855642	0.0095649	0.00593313	0.00759762	0.0366471	0.0406092	0.00504491	0.00830542	0.240135	0.244079		388.8	-0.00439	0	-0.01147	0	-0.00587	0	-0.01016	0	-0.0115	0	-0.00524	0	-0.00224	0
389	0.0310168	0.025402	0.0737668	0.0634311	0.401576	0.407158	1.18021	1.1967	0.864072	0.863472	0.0340673	0.0306073	0.140641	0.138979		389	0.508141	0.50708	0.0866907	0.0914756	0.00865692	0.00956547	0.00544435	0.00759814	0.0363945	0.0406109	0.00562856	0.00830597	0.239917	0.244079		389	-0.0039	0	-0.01095	0	-0.00527	0	-0.00961	0	-0.01088	0	-0.00545	0	-0.00209	0
389.2	0.0308095	0.0254355	0.073518	0.0635128	0.401556	0.40758	1.17935	1.19681	0.864222	0.863994	0.0338557	0.0306474	0.140689	0.139149		389.2	0.508887	0.50708	0.0871304	0.091477	0.00934537	0.00956603	0.00581257	0.00759866	0.0367689	0.0406127	0.00582614	0.00830652	0.240616	0.244079		389.2	-0.00383	0	-0.0112	0	-0.00559	0	-0.0094	0	-0.01103	0	-0.00589	0	-0.00269	0
389.4	0.0312619	0.025469	0.0735822	0.0635945	0.401611	0.408002	1.17946	1.19691	0.864861	0.864516	0.0338434	0.0306875	0.141277	0.139319		389.4	0.509025	0.50708	0.0874577	0.0914784	0.00921025	0.00956659	0.00590777	0.00759918	0.0368207	0.0406144	0.00620064	0.00830706	0.240845	0.244079		389.4	-0.00387	0	-0.01114	0	-0.00556	0	-0.00934	0	-0.01059	0	-0.00575	0	-0.00312	0
389.6	0.031261	0.0255025	0.0734718	0.0636761	0.401677	0.408424	1.17947	1.19701	0.865884	0.865037	0.0342137	0.0307276	0.141315	0.139488		389.6	0.508925	0.50708	0.0874642	0.0914798	0.008903	0.00956715	0.0053886	0.00759969	0.0369433	0.0406161	0.00669221	0.0083076	0.240687	0.244079		389.6	-0.00383	0	-0.01067	0	-0.00525	0	-0.00873	0	-0.0105	0	-0.00632	0	-0.00303	0
389.8	0.0311358	0.025536	0.0735359	0.0637578	0.402267	0.408845	1.17965	1.19711	0.866621	0.865556	0.0349914	0.0307677	0.141399	0.139658		389.8	0.509082	0.50708	0.0876576	0.0914811	0.00924213	0.00956771	0.00572398	0.0076002	0.037419	0.0406178	0.00747539	0.00830814	0.240986	0.24408		389.8	-0.0037	0	-0.01042	0	-0.00513	0	-0.0086	0	-0.01038	0	-0.00671	0	-0.00281	0
390	0.0309804	0.0255694	0.0739766	0.0638394	0.402548	0.409266	1.18024	1.19721	0.867099	0.866075	0.0354348	0.0308078	0.14154	0.139828		390	0.510142	0.50708	0.0883299	0.0914825	0.00978985	0.00956826	0.00630847	0.00760071	0.0380612	0.0406194	0.00880543	0.00830868	0.241506	0.24408		390	-0.00388	0	-0.01073	0	-0.00503	0	-0.00851	0	-0.01077	0	-0.00673	0	-0.00263	0
390.2	0.0319776	0.0256029	0.0744544	0.0639211	0.403297	0.409687	1.18078	1.1973	0.868069	0.866593	0.0362333	0.0308479	0.142422	0.139997		390.2	0.510794	0.50708	0.088254	0.0914838	0.009677	0.00956881	0.00651204	0.00760121	0.0381012	0.0406211	0.00917904	0.00830921	0.241871	0.24408		390.2	-0.00399	0	-0.01067	0	-0.00464	0	-0.00854	0	-0.01051	0	-0.00689	0	-0.00258	0
390.4	0.031365	0.0256364	0.0740141	0.0640027	0.402929	0.410108	1.18012	1.1974	0.867629	0.867109	0.0357577	0.030888	0.141835	0.140167		390.4	0.510795	0.50708	0.0887831	0.0914851	0.00984406	0.00956935	0.00686325	0.00760172	0.0381677	0.0406228	0.00967473	0.00830974	0.241689	0.24408		390.4	-0.00368	0	-0.01022	0	-0.00454	0	-0.00818	0	-0.01062	0	-0.00676	0	-0.00224	0
390.6	0.0314946	0.0256698	0.0735707	0.0640843	0.403047	0.410528	1.18006	1.1975	0.868041	0.867625	0.0358929	0.0309281	0.141883	0.140336		390.6	0.510614	0.50708	0.0891031	0.0914864	0.00951832	0.00956989	0.00701831	0.00760221	0.0380227	0.0406244	0.00932609	0.00831026	0.242049	0.24408		390.6	-0.00424	0	-0.01094	0	-0.00487	0	-0.00875	0	-0.01124	0	-0.00752	0	-0.0024	0
390.8	0.03151	0.0257033	0.0734459	0.0641659	0.403874	0.410948	1.18036	1.1976	0.869159	0.86814	0.0362003	0.0309681	0.142017	0.140506		390.8	0.510319	0.50708	0.0889298	0.0914878	0.00963571	0.00957043	0.00696578	0.00760271	0.0381336	0.040626	0.00897048	0.00831078	0.242016	0.24408		390.8	-0.00371	0	-0.01099	0	-0.00493	0	-0.00899	0	-0.01152	0	-0.00751	0	-0.00244	0
391	0.0314226	0.0257368	0.0736941	0.0642476	0.404619	0.411368	1.18062	1.19769	0.870221	0.868653	0.0363012	0.0310082	0.142618	0.140675		391	0.509723	0.50708	0.0888335	0.091489	0.00971081	0.00957097	0.00695534	0.0076032	0.0378101	0.0406277	0.00879031	0.0083113	0.242149	0.24408		391	-0.00418	0	-0.01125	0	-0.00492	0	-0.0097	0	-0.01184	0	-0.00774	0	-0.00259	0
391.2	0.0315576	0.0257702	0.0741043	0.0643291	0.405731	0.411787	1.18074	1.19779	0.871413	0.869166	0.0366919	0.0310483	0.143464	0.140844		391.2	0.50943	0.50708	0.0882587	0.0914903	0.00973614	0.0095715	0.00694677	0.00760369	0.0378364	0.0406293	0.00808654	0.00831182	0.241885	0.244081		391.2	-0.00456	0	-0.01172	0	-0.00553	0	-0.01022	0	-0.01242	0	-0.00871	0	-0.00304	0
391.4	0.0314389	0.0258037	0.0741436	0.0644107	0.406457	0.412206	1.18099	1.19788	0.872092	0.869678	0.0369716	0.0310884	0.143869	0.141014		391.4	0.509382	0.50708	0.0885632	0.0914916	0.0101785	0.00957203	0.00691316	0.00760418	0.0384068	0.0406309	0.00809269	0.00831233	0.242187	0.244081		391.4	-0.00481	0	-0.01158	0	-0.00544	0	-0.01005	0	-0.01227	0	-0.00864	0	-0.003	0
391.6	0.0319371	0.0258371	0.0743255	0.0644923	0.407376	0.412625	1.18172	1.19798	0.872385	0.870188	0.0374546	0.0311285	0.144566	0.141183		391.6	0.509248	0.50708	0.0884651	0.0914928	0.00967424	0.00957255	0.00634153	0.00760466	0.0380607	0.0406325	0.00794785	0.00831284	0.241812	0.244081		391.6	-0.00469	0	-0.01156	0	-0.00553	0	-0.01006	0	-0.01228	0	-0.00857	0	-0.00324	0
391.8	0.0321852	0.0258706	0.0745665	0.0645739	0.408397	0.413043	1.18229	1.19807	0.872711	0.870698	0.0375199	0.0311685	0.145127	0.141352		391.8	0.508861	0.50708	0.0881973	0.0914941	0.00957619	0.00957307	0.00664304	0.00760514	0.038299	0.040634	0.00804987	0.00831335	0.24192	0.244081		391.8	-0.00461	0	-0.0116	0	-0.00577	0	-0.01054	0	-0.01265	0	-0.00854	0	-0.00328	0
392	0.0323321	0.0259041	0.0748153	0.0646554	0.408797	0.413462	1.18303	1.19817	0.873273	0.871207	0.0377128	0.0312086	0.14528	0.141521		392	0.507938	0.50708	0.0875589	0.0914953	0.00942761	0.00957359	0.0060731	0.00760562	0.0375128	0.0406356	0.00730653	0.00831385	0.240622	0.244081		392	-0.00409	0	-0.01172	0	-0.00606	0	-0.01078	0	-0.01277	0	-0.00819	0	-0.00326	0
392.2	0.0325931	0.0259375	0.0753366	0.064737	0.409089	0.41388	1.18387	1.19826	0.873901	0.871715	0.037771	0.0312487	0.14553	0.14169		392.2	0.507854	0.50708	0.0874264	0.0914965	0.00898036	0.00957411	0.00627845	0.00760609	0.0378665	0.0406371	0.00659651	0.00831435	0.240091	0.244081		392.2	-0.00466	0	-0.01155	0	-0.00622	0	-0.0111	0	-0.01275	0	-0.00814	0	-0.00378	0
392.4	0.0327469	0.025971	0.0757514	0.0648185	0.410095	0.414297	1.18466	1.19835	0.875164	0.872222	0.0379916	0.0312888	0.145765	0.141859		392.4	0.507887	0.50708	0.0872036	0.0914978	0.00906904	0.00957462	0.00643612	0.00760657	0.0376964	0.0406387	0.00646009	0.00831485	0.240061	0.244081		392.4	-0.00435	0	-0.01111	0	-0.00589	0	-0.01086	0	-0.01214	0	-0.00745	0	-0.00372	0
392.6	0.0333607	0.0260044	0.0760612	0.0649001	0.411067	0.414715	1.18529	1.19845	0.875743	0.872728	0.0382014	0.0313288	0.145917	0.142028		392.6	0.508202	0.50708	0.0867786	0.091499	0.00908723	0.00957513	0.00591613	0.00760704	0.0375335	0.0406402	0.00631114	0.00831534	0.239714	0.244081		392.6	-0.00425	0	-0.01125	0	-0.00548	0	-0.01063	0	-0.01245	0	-0.00724	0	-0.00407	0
392.8	0.032849	0.0260379	0.0760251	0.0649816	0.411082	0.415132	1.18503	1.19854	0.875985	0.873233	0.0377802	0.0313689	0.145809	0.142197		392.8	0.508082	0.50708	0.0863245	0.0915002	0.00868185	0.00957563	0.00613993	0.0076075	0.036945	0.0406418	0.00541228	0.00831583	0.23954	0.244081		392.8	-0.00386	0	-0.0105	0	-0.00477	0	-0.01045	0	-0.01215	0	-0.00684	0	-0.00395	0
393	0.0332473	0.0260713	0.076072	0.0650631	0.411021	0.415549	1.18501	1.19863	0.875784	0.873737	0.0379077	0.0314089	0.145806	0.142366		393	0.508261	0.50708	0.0864421	0.0915013	0.00904268	0.00957613	0.00572686	0.00760797	0.036702	0.0406433	0.00529463	0.00831632	0.239318	0.244082		393	-0.00326	0	-0.00999	0	-0.00436	0	-0.00992	0	-0.01126	0	-0.00664	0	-0.0034	0
393.2	0.033392	0.0261048	0.0761599	0.0651446	0.411192	0.415966	1.18509	1.19872	0.875787	0.87424	0.0373209	0.031449	0.145769	0.142535		393.2	0.508608	0.50708	0.0871098	0.0915025	0.00949167	0.00957663	0.00639111	0.00760843	0.03735	0.0406448	0.00554674	0.00831681	0.239808	0.244082		393.2	-0.00311	0	-0.00962	0	-0.00469	0	-0.01001	0	-0.01096	0	-0.00674	0	-0.00332	0
393.4	0.0337123	0.0261382	0.0761014	0.0652261	0.411522	0.416382	1.18505	1.19881	0.875454	0.874742	0.0370481	0.031489	0.145242	0.142704		393.4	0.508421	0.50708	0.0868745	0.0915037	0.00941879	0.00957713	0.00580097	0.00760888	0.0371702	0.0406463	0.00538697	0.00831729	0.239694	0.244082		393.4	-0.00315	0	-0.00919	0	-0.00416	0	-0.00937	0	-0.01028	0	-0.00606	0	-0.00288	0
393.6	0.0333552	0.0261717	0.0759498	0.0653076	0.411316	0.416798	1.18476	1.1989	0.875526	0.875243	0.0367221	0.0315291	0.144938	0.142873		393.6	0.508246	0.50708	0.0871929	0.0915048	0.00925714	0.00957762	0.005662	0.00760934	0.0375067	0.0406478	0.00580362	0.00831777	0.239526	0.244082		393.6	-0.00307	0	-0.00912	0	-0.00422	0	-0.00953	0	-0.01083	0	-0.0062	0	-0.00273	0
393.8	0.0336813	0.0262051	0.0762739	0.0653891	0.411691	0.417214	1.18531	1.19899	0.875845	0.875743	0.0366292	0.0315691	0.145144	0.143042		393.8	0.508624	0.50708	0.0877721	0.091506	0.00948012	0.00957811	0.00615821	0.00760979	0.0377681	0.0406492	0.00619614	0.00831824	0.240165	0.244082		393.8	-0.0034	0	-0.00977	0	-0.00446	0	-0.01001	0	-0.01096	0	-0.00662	0	-0.00294	0
394	0.0339263	0.0262385	0.0769696	0.0654705	0.412104	0.417629	1.18554	1.19908	0.876422	0.876242	0.0369765	0.0316092	0.145708	0.143211		394	0.509206	0.50708	0.0882681	0.0915071	0.00933634	0.0095786	0.0064992	0.00761024	0.0380042	0.0406507	0.00649434	0.00831872	0.240682	0.244082		394	-0.00324	0	-0.00984	0	-0.00422	0	-0.01018	0	-0.01091	0	-0.00631	0	-0.00283	0
394.2	0.0344583	0.026272	0.0771564	0.065552	0.412054	0.418044	1.18527	1.19916	0.877035	0.87674	0.0367063	0.0316492	0.146444	0.143379		394.2	0.509242	0.50708	0.0885764	0.0915082	0.00889314	0.00957908	0.00619827	0.00761069	0.0379246	0.0406521	0.00639024	0.00831919	0.240914	0.244082		394.2	-0.00264	0	-0.00942	0	-0.00358	0	-0.01012	0	-0.01014	0	-0.00611	0	-0.00249	0
394.4	0.0336171	0.0263054	0.0763378	0.0656334	0.411464	0.418459	1.18431	1.19925	0.876903	0.877238	0.0359545	0.0316893	0.145885	0.143548		394.4	0.50846	0.50708	0.0890558	0.0915094	0.00853781	0.00957956	0.00637528	0.00761113	0.0376932	0.0406536	0.00650038	0.00831966	0.240559	0.244082		394.4	-0.00266	0	-0.00997	0	-0.00372	0	-0.01003	0	-0.01047	0	-0.00586	0	-0.00259	0
394.6	0.0340855	0.0263389	0.0760999	0.0657149	0.412224	0.418874	1.18469	1.19934	0.877855	0.877734	0.0362709	0.0317293	0.146199	0.143717		394.6	0.508225	0.50708	0.0892601	0.0915105	0.00861013	0.00958004	0.00666657	0.00761158	0.0381441	0.040655	0.00655871	0.00832012	0.241234	0.244082		394.6	-0.00281	0	-0.01036	0	-0.00405	0	-0.01012	0	-0.01017	0	-0.00557	0	-0.00241	0
394.8	0.0343306	0.0263723	0.0762363	0.0657963	0.413106	0.419288	1.18501	1.19942	0.879181	0.878229	0.0362587	0.0317694	0.14676	0.143885		394.8	0.508054	0.50708	0.0896041	0.0915116	0.00888779	0.00958052	0.00689826	0.00761201	0.0386599	0.0406564	0.00665076	0.00832058	0.242002	0.244082		394.8	-0.00265	0	-0.01002	0	-0.00421	0	-0.01019	0	-0.01019	0	-0.00559	0	-0.00272	0
395	0.0343465	0.0264057	0.0765865	0.0658777	0.413701	0.419703	1.18497	1.19951	0.87959	0.878724	0.0360793	0.0318094	0.14733	0.144054		395	0.507394	0.50708	0.0895646	0.0915127	0.00837477	0.00958099	0.00707628	0.00761245	0.0384884	0.0406579	0.0068076	0.00832104	0.24259	0.244083		395	-0.00355	0	-0.01065	0	-0.00471	0	-0.01046	0	-0.01031	0	-0.006	0	-0.00313	0
395.2	0.0338185	0.0264392	0.0769763	0.0659591	0.413977	0.420116	1.18488	1.1996	0.87998	0.879217	0.0364559	0.0318494	0.147422	0.144222		395.2	0.507726	0.50708	0.0896901	0.0915137	0.00839333	0.00958146	0.00746968	0.00761288	0.0385622	0.0406593	0.00691014	0.0083215	0.242954	0.244083		395.2	-0.00348	0	-0.01049	0	-0.0053	0	-0.01096	0	-0.01075	0	-0.00622	0	-0.00344	0
395.4	0.0336894	0.0264726	0.0772477	0.0660406	0.414418	0.42053	1.185	1.19968	0.880444	0.87971	0.0370131	0.0318894	0.147898	0.144391		395.4	0.507556	0.50708	0.0899563	0.0915148	0.00826836	0.00958192	0.00690553	0.00761332	0.0383845	0.0406607	0.00703595	0.00832195	0.242661	0.244083		395.4	-0.00363	0	-0.01041	0	-0.00551	0	-0.0112	0	-0.01147	0	-0.00608	0	-0.00363	0
395.6	0.0335876	0.026506	0.0775147	0.0661219	0.414984	0.420943	1.18528	1.19977	0.881334	0.880201	0.037601	0.0319295	0.148011	0.144559		395.6	0.507409	0.50708	0.089913	0.0915159	0.00808085	0.00958239	0.00637512	0.00761374	0.0381382	0.040662	0.00720882	0.0083224	0.242105	0.244083		395.6	-0.00383	0	-0.0105	0	-0.00564	0	-0.01104	0	-0.01135	0	-0.00591	0	-0.00427	0
395.8	0.0336656	0.0265394	0.0776334	0.0662033	0.415832	0.421356	1.18569	1.19985	0.882092	0.880692	0.0378148	0.0319695	0.148346	0.144727		395.8	0.507292	0.50708	0.0896326	0.0915169	0.00774125	0.00958285	0.00626244	0.00761417	0.0382014	0.0406634	0.00720971	0.00832285	0.241697	0.244083		395.8	-0.00452	0	-0.01071	0	-0.00593	0	-0.01121	0	-0.01177	0	-0.00613	0	-0.0049	0
396	0.0338268	0.0265729	0.0782405	0.0662847	0.417079	0.421769	1.1862	1.19993	0.883043	0.881182	0.0379847	0.0320095	0.148388	0.144896		396	0.50709	0.50708	0.0893832	0.091518	0.00779745	0.0095833	0.00611641	0.00761459	0.0379394	0.0406648	0.00688795	0.0083233	0.24114	0.244083		396	-0.00462	0	-0.01081	0	-0.0058	0	-0.0105	0	-0.01164	0	-0.00561	0	-0.00475	0
396.2	0.0337569	0.0266063	0.0784168	0.0663661	0.418195	0.422182	1.18629	1.20002	0.884078	0.88167	0.0385424	0.0320495	0.148898	0.145064		396.2	0.507987	0.50708	0.0895893	0.091519	0.00780057	0.00958376	0.00670824	0.00761502	0.0384687	0.0406661	0.00754611	0.00832374	0.241407	0.244083		396.2	-0.0047	0	-0.01057	0	-0.00561	0	-0.01024	0	-0.01144	0	-0.00536	0	-0.00451	0
396.4	0.0333025	0.0266397	0.0779595	0.0664475	0.418966	0.422594	1.18614	1.2001	0.884687	0.882158	0.038275	0.0320896	0.148734	0.145232		396.4	0.508042	0.50708	0.0891479	0.09152	0.00772271	0.00958421	0.00658666	0.00761543	0.0381239	0.0406675	0.00747035	0.00832418	0.24127	0.244083		396.4	-0.00449	0	-0.01071	0	-0.00562	0	-0.00953	0	-0.01133	0	-0.00521	0	-0.00406	0
396.6	0.0331881	0.0266731	0.0779489	0.0665288	0.419499	0.423006	1.18615	1.20018	0.884568	0.882645	0.0381568	0.0321296	0.148923	0.1454		396.6	0.508273	0.50708	0.0886981	0.091521	0.00797563	0.00958466	0.0062654	0.00761585	0.0378928	0.0406688	0.00696221	0.00832462	0.240669	0.244083		396.6	-0.00402	0	-0.01066	0	-0.00507	0	-0.00817	0	-0.01104	0	-0.00442	0	-0.00352	0
396.8	0.0322749	0.0267065	0.0777006	0.0666102	0.41903	0.423417	1.18551	1.20026	0.884388	0.883131	0.0378279	0.0321696	0.148559	0.145569		396.8	0.508428	0.50708	0.089044	0.091522	0.00813422	0.0095851	0.00662268	0.00761626	0.0383537	0.0406702	0.00689296	0.00832505	0.241073	0.244083		396.8	-0.00348	0	-0.01025	0	-0.00468	0	-0.00767	0	-0.01053	0	-0.00409	0	-0.00247	0
397	0.0323924	0.02674	0.0779111	0.0666915	0.419479	0.423829	1.18605	1.20035	0.884887	0.883616	0.0379749	0.0322096	0.14874	0.145737		397	0.508417	0.50708	0.0889618	0.091523	0.00872339	0.00958555	0.00618798	0.00761667	0.0385704	0.0406715	0.00691414	0.00832549	0.24059	0.244083		397	-0.00374	0	-0.01076	0	-0.00535	0	-0.00794	0	-0.01064	0	-0.00416	0	-0.00242	0
397.2	0.0320274	0.0267734	0.0772981	0.0667728	0.419752	0.42424	1.18575	1.20043	0.884656	0.8841	0.0371781	0.0322496	0.148278	0.145905		397.2	0.5084	0.50708	0.0889735	0.091524	0.00895341	0.00958599	0.00633284	0.00761708	0.038829	0.0406728	0.00705246	0.00832591	0.240149	0.244084		397.2	-0.00313	0	-0.0108	0	-0.00491	0	-0.00799	0	-0.01065	0	-0.0037	0	-0.00227	0
397.4	0.0318035	0.0268068	0.0766946	0.0668541	0.419476	0.424651	1.18583	1.20051	0.884774	0.884584	0.0367081	0.0322896	0.147808	0.146073		397.4	0.508104	0.50708	0.0883429	0.091525	0.00860311	0.00958642	0.00570164	0.00761749	0.0384631	0.0406741	0.00654599	0.00832634	0.239863	0.244084		397.4	-0.00289	0	-0.01093	0	-0.0048	0	-0.00768	0	-0.01049	0	-0.00327	0	-0.00189	0
397.6	0.0319162	0.0268402	0.0768568	0.0669354	0.419721	0.425061	1.18624	1.20059	0.885419	0.885066	0.0368241	0.0323296	0.14854	0.146241		397.6	0.508422	0.50708	0.0883744	0.091526	0.00873017	0.00958686	0.00635465	0.00761789	0.0386216	0.0406754	0.00670211	0.00832677	0.239759	0.244084		397.6	-0.00254	0	-0.01057	0	-0.00442	0	-0.00783	0	-0.01086	0	-0.00295	0	-0.00159	0
397.8	0.032008	0.0268736	0.0769819	0.0670167	0.42039	0.425472	1.1864	1.20067	0.885849	0.885547	0.0365367	0.0323696	0.148379	0.146409		397.8	0.509348	0.50708	0.0886107	0.0915269	0.0094621	0.00958729	0.00683105	0.00761829	0.0386968	0.0406767	0.00707208	0.00832719	0.240485	0.244084		397.8	-0.00217	0	-0.01034	0	-0.00367	0	-0.00765	0	-0.01101	0	-0.0031	0	-0.00136	0
398	0.0325887	0.026907	0.0775982	0.067098	0.421243	0.425882	1.18633	1.20075	0.886516	0.886028	0.0370691	0.0324096	0.148894	0.146577		398	0.509325	0.50708	0.0885492	0.0915279	0.00935904	0.00958772	0.00666849	0.00761869	0.0382999	0.040678	0.00686193	0.00832761	0.240157	0.244084		398	-0.00168	0	-0.0105	0	-0.00297	0	-0.00772	0	-0.0105	0	-0.00286	0	-0.00032	0
398.2	0.033156	0.0269404	0.0774277	0.0671793	0.421304	0.426291	1.18621	1.20082	0.887137	0.886507	0.0371315	0.0324496	0.14929	0.146745		398.2	0.509466	0.50708	0.0886879	0.0915289	0.00959095	0.00958815	0.00651483	0.00761909	0.0380412	0.0406792	0.00675503	0.00832802	0.240122	0.244084		398.2	-0.00167	0	-0.01074	0	-0.00253	0	-0.00795	0	-0.01039	0	-0.00309	0	-6.3e-05	0
398.4	0.0336113	0.0269738	0.0777231	0.0672606	0.421567	0.426701	1.18632	1.2009	0.887673	0.886986	0.0377167	0.0324895	0.149356	0.146912		398.4	0.509467	0.50708	0.0883329	0.0915298	0.00923681	0.00958857	0.00702355	0.00761948	0.0375328	0.0406805	0.00694184	0.00832844	0.239856	0.244084		398.4	-0.00197	0	-0.01135	0	-0.00262	0	-0.00899	0	-0.01068	0	-0.00308	0	-0.00078	0
398.6	0.0338488	0.0270072	0.078052	0.0673418	0.421875	0.42711	1.18679	1.20098	0.888417	0.887463	0.0380685	0.0325295	0.149613	0.14708		398.6	0.510123	0.50708	0.0887347	0.0915307	0.010052	0.00958899	0.00752999	0.00761988	0.0379876	0.0406817	0.00740663	0.00832885	0.240866	0.244084		398.6	-0.00159	0	-0.01072	0	-0.00225	0	-0.00923	0	-0.00997	0	-0.00267	0	-0.00034	0
398.8	0.0338621	0.0270406	0.078013	0.0674231	0.422182	0.427519	1.18668	1.20106	0.888561	0.88794	0.0378803	0.0325695	0.149214	0.147248		398.8	0.510037	0.50708	0.0891653	0.0915317	0.00972466	0.00958941	0.00769797	0.00762026	0.0375333	0.040683	0.00720421	0.00832926	0.24088	0.244084		398.8	-0.00177	0	-0.01114	0	-0.00238	0	-0.01004	0	-0.0103	0	-0.00308	0	-0.00114	0
399	0.0331317	0.027074	0.0780507	0.0675043	0.422284	0.427928	1.18638	1.20113	0.888764	0.888416	0.0381568	0.0326095	0.149177	0.147416		399	0.509745	0.50708	0.0891476	0.0915326	0.00966858	0.00958983	0.00773388	0.00762065	0.0369474	0.0406842	0.00749361	0.00832967	0.241007	0.244084		399	-0.00229	0	-0.01155	0	-0.00297	0	-0.01106	0	-0.01076	0	-0.00351	0	-0.00175	0
399.2	0.0328991	0.0271074	0.0786493	0.0675856	0.422729	0.428336	1.18641	1.20121	0.889413	0.888891	0.0386964	0.0326495	0.14919	0.147583		399.2	0.509772	0.50708	0.0896549	0.0915335	0.0098243	0.00959024	0.00775415	0.00762104	0.0365386	0.0406854	0.00771279	0.00833007	0.24102	0.244084		399.2	-0.00282	0	-0.01133	0	-0.00322	0	-0.01201	0	-0.01132	0	-0.00411	0	-0.00227	0
399.4	0.0335139	0.0271408	0.0788112	0.0676668	0.423502	0.428744	1.18675	1.20129	0.890068	0.889365	0.0391965	0.0326895	0.149459	0.147751		399.4	0.508978	0.50708	0.089416	0.0915344	0.00964326	0.00959065	0.00686475	0.00762142	0.0359853	0.0406866	0.00724298	0.00833047	0.240762	0.244084		399.4	-0.00334	0	-0.01177	0	-0.00332	0	-0.01281	0	-0.01168	0	-0.00497	0	-0.00304	0
399.6	0.0332872	0.0271742	0.0792421	0.067748	0.424345	0.429152	1.18718	1.20136	0.890723	0.889838	0.0391275	0.0327294	0.149505	0.147919		399.6	0.508912	0.50708	0.0894038	0.0915353	0.00970019	0.00959106	0.00667671	0.0076218	0.0358978	0.0406879	0.00709751	0.00833087	0.240575	0.244084		399.6	-0.00388	0	-0.01177	0	-0.00365	0	-0.0129	0	-0.01081	0	-0.00553	0	-0.00358	0
399.8	0.0335498	0.0272076	0.0794366	0.0678292	0.425209	0.42956	1.18753	1.20144	0.891059	0.890311	0.0392899	0.0327694	0.150079	0.148086		399.8	0.508828	0.50708	0.0893533	0.0915362	0.00960232	0.00959147	0.00646527	0.00762218	0.0358274	0.0406891	0.00726246	0.00833127	0.240652	0.244085		399.8	-0.00418	0	-0.01177	0	-0.0041	0	-0.01279	0	-0.01103	0	-0.00621	0	-0.00389	0
400	0.033674	0.027241	0.0798703	0.0679104	0.426123	0.429967	1.18777	1.20151	0.891852	0.890782	0.0393128	0.0328094	0.150444	0.148254		400	0.508634	0.50708	0.0894629	0.091537	0.00943917	0.00959187	0.00637231	0.00762255	0.0358637	0.0406903	0.00693253	0.00833166	0.240538	0.244085		400	-0.00371	0	-0.01166	0	-0.00442	0	-0.01238	0	-0.01105	0	-0.00658	0	-0.00353	0
400.2	0.0338709	0.0272744	0.0797943	0.0679916	0.425926	0.430374	1.18769	1.20159	0.892516	0.891252	0.0395026	0.0328493	0.150993	0.148421		400.2	0.508623	0.50708	0.0894597	0.0915379	0.00926707	0.00959227	0.00617571	0.00762292	0.0362306	0.0406914	0.00678567	0.00833206	0.240462	0.244085		400.2	-0.00372	0	-0.01139	0	-0.00452	0	-0.01206	0	-0.01123	0	-0.00698	0	-0.0035	0
400.4	0.0334341	0.0273078	0.0791331	0.0680728	0.425601	0.430781	1.18744	1.20166	0.892452	0.891722	0.0385246	0.0328893	0.150866	0.148588		400.4	0.508449	0.50708	0.0888546	0.0915388	0.00957628	0.00959267	0.00568675	0.0076233	0.0362542	0.0406926	0.00601443	0.00833244	0.24056	0.244085		400.4	-0.00371	0	-0.01137	0	-0.00468	0	-0.01119	0	-0.01107	0	-0.00717	0	-0.00366	0
400.6	0.0333726	0.0273412	0.0791881	0.068154	0.425623	0.431187	1.18722	1.20173	0.892448	0.89219	0.038432	0.0329293	0.150944	0.148756		400.6	0.508097	0.50708	0.0886301	0.0915397	0.0095922	0.00959306	0.00537372	0.00762366	0.0364947	0.0406938	0.00556177	0.00833283	0.240268	0.244085		400.6	-0.00389	0	-0.01132	0	-0.00489	0	-0.01023	0	-0.01094	0	-0.00682	0	-0.00342	0
400.8	0.0329617	0.0273746	0.0788684	0.0682351	0.425475	0.431593	1.1873	1.20181	0.892528	0.892658	0.0377547	0.0329692	0.151081	0.148923		400.8	0.508168	0.50708	0.0890738	0.0915405	0.0097779	0.00959346	0.005327	0.00762403	0.0375793	0.040695	0.00554705	0.00833322	0.241163	0.244085		400.8	-0.00421	0	-0.01128	0	-0.0048	0	-0.0105	0	-0.01132	0	-0.00733	0	-0.00314	0
401	0.0324645	0.0274079	0.0787824	0.0683163	0.425975	0.431999	1.18783	1.20188	0.893295	0.893125	0.0375455	0.0330092	0.151386	0.14909		401	0.508137	0.50708	0.0884954	0.0915413	0.00949849	0.00959385	0.00494887	0.0076244	0.037959	0.0406961	0.00574002	0.0083336	0.240645	0.244085		401	-0.00425	0	-0.01116	0	-0.00518	0	-0.01002	0	-0.01143	0	-0.00719	0	-0.0035	0
401.2	0.0327009	0.0274413	0.0787866	0.0683974	0.426989	0.432405	1.18867	1.20195	0.893758	0.893591	0.0377096	0.0330491	0.151789	0.149258		401.2	0.508335	0.50708	0.0889097	0.0915422	0.00951098	0.00959424	0.00499026	0.00762476	0.0383377	0.0406972	0.00625975	0.00833398	0.240932	0.244085		401.2	-0.00433	0	-0.01097	0	-0.0048	0	-0.00975	0	-0.0115	0	-0.00679	0	-0.00306	0
401.4	0.0326427	0.0274747	0.0792632	0.0684786	0.427246	0.43281	1.18953	1.20202	0.894738	0.894056	0.0381872	0.0330891	0.1523	0.149425		401.4	0.508944	0.50708	0.0886219	0.091543	0.00989496	0.00959462	0.00570093	0.00762512	0.0388574	0.0406984	0.00691828	0.00833436	0.241926	0.244085		401.4	-0.00444	0	-0.01073	0	-0.0043	0	-0.00899	0	-0.01127	0	-0.00669	0	-0.00269	0
401.6	0.0327798	0.0275081	0.0794914	0.0685597	0.428011	0.433215	1.18991	1.20209	0.895186	0.89452	0.0385404	0.033129	0.152822	0.149592		401.6	0.509388	0.50708	0.0884688	0.0915438	0.0103479	0.00959501	0.00588742	0.00762548	0.0392389	0.0406995	0.00739683	0.00833473	0.242258	0.244085		401.6	-0.00442	0	-0.01018	0	-0.0035	0	-0.0079	0	-0.01113	0	-0.00599	0	-0.0021	0
401.8	0.0329357	0.0275414	0.0795131	0.0686408	0.42815	0.43362	1.18976	1.20217	0.89545	0.894984	0.0380656	0.033169	0.152768	0.149759		401.8	0.509686	0.50708	0.0887563	0.0915447	0.0107958	0.00959539	0.00609079	0.00762583	0.039858	0.0407006	0.00790347	0.00833511	0.24249	0.244085		401.8	-0.00466	0	-0.01035	0	-0.00329	0	-0.00781	0	-0.01161	0	-0.00602	0	-0.00198	0
402	0.0338458	0.0275748	0.0801553	0.0687219	0.428598	0.434025	1.19016	1.20224	0.896381	0.895446	0.0388935	0.0332089	0.153776	0.149926		402	0.509804	0.50708	0.088276	0.0915455	0.0105049	0.00959577	0.00625063	0.00762618	0.0399451	0.0407018	0.00798023	0.00833548	0.242457	0.244085		402	-0.00443	0	-0.01067	0	-0.00305	0	-0.00759	0	-0.01094	0	-0.0055	0	-0.00122	0
402.2	0.0341317	0.0276082	0.0802415	0.068803	0.428984	0.434429	1.19066	1.20231	0.897161	0.895908	0.0388295	0.0332489	0.154296	0.150093		402.2	0.51004	0.50708	0.0884288	0.0915463	0.0104853	0.00959614	0.00667901	0.00762654	0.0402478	0.0407028	0.00849631	0.00833585	0.242292	0.244085		402.2	-0.00422	0	-0.01037	0	-0.00286	0	-0.00743	0	-0.01063	0	-0.0048	0	-0.0012	0
402.4	0.0349474	0.0276416	0.0808448	0.0688841	0.429517	0.434833	1.19115	1.20238	0.897521	0.896368	0.039383	0.0332888	0.154569	0.15026		402.4	0.510278	0.50708	0.0882672	0.0915471	0.0105489	0.00959652	0.00694336	0.00762689	0.0405345	0.040704	0.00864129	0.00833622	0.242416	0.244085		402.4	-0.0041	0	-0.00998	0	-0.00265	0	-0.00755	0	-0.01027	0	-0.00416	0	-0.00116	0
402.6	0.0350943	0.027675	0.0808124	0.0689652	0.429852	0.435237	1.19117	1.20245	0.897867	0.896828	0.0392392	0.0333287	0.154602	0.150427		402.6	0.510281	0.50708	0.0887892	0.0915478	0.0113728	0.00959689	0.00704833	0.00762723	0.0407789	0.040705	0.00890125	0.00833658	0.242969	0.244085		402.6	-0.00418	0	-0.00969	0	-0.00256	0	-0.0073	0	-0.00987	0	-0.00346	0	-0.0005	0
402.8	0.0349672	0.0277083	0.0808916	0.0690463	0.430096	0.435641	1.19089	1.20251	0.897914	0.897287	0.0392542	0.0333687	0.154336	0.150594		402.8	0.510031	0.50708	0.0892789	0.0915486	0.0110464	0.00959726	0.00741253	0.00762758	0.0402813	0.0407061	0.00893352	0.00833694	0.242627	0.244085		402.8	-0.0043	0	-0.01008	0	-0.00347	0	-0.00787	0	-0.01007	0	-0.00403	0	-0.00125	0
403	0.0351254	0.0277417	0.0811113	0.0691273	0.430752	0.436044	1.19138	1.20258	0.899209	0.897745	0.0396484	0.0334086	0.154995	0.150761		403	0.510154	0.50708	0.0895801	0.0915494	0.011379	0.00959763	0.00745887	0.00762792	0.0401432	0.0407072	0.00910223	0.0083373	0.242711	0.244086		403	-0.00419	0	-0.00979	0	-0.00398	0	-0.00875	0	-0.0102	0	-0.00409	0	-0.0012	0
403.2	0.0362063	0.027775	0.0822077	0.0692084	0.432111	0.436447	1.19217	1.20265	0.900475	0.898202	0.0401243	0.0334485	0.15538	0.150928		403.2	0.509822	0.50708	0.0896643	0.0915502	0.0109078	0.00959799	0.00718217	0.00762826	0.0404573	0.0407083	0.00883624	0.00833766	0.242949	0.244086		403.2	-0.00411	0	-0.00978	0	-0.00424	0	-0.00895	0	-0.01013	0	-0.00441	0	-0.00133	0
403.4	0.0367539	0.0278084	0.0826193	0.0692894	0.432524	0.43685	1.19279	1.20272	0.901164	0.898658	0.0402913	0.0334885	0.155721	0.151095		403.4	0.509822	0.50708	0.0896074	0.0915509	0.0109107	0.00959835	0.00714304	0.0076286	0.040392	0.0407093	0.00842518	0.00833802	0.243046	0.244086		403.4	-0.00346	0	-0.01005	0	-0.00475	0	-0.0094	0	-0.01004	0	-0.00462	0	-0.00149	0
403.6	0.0362119	0.0278418	0.0828415	0.0693705	0.432752	0.437252	1.19266	1.20279	0.90138	0.899114	0.0398927	0.0335284	0.15577	0.151261		403.6	0.509648	0.50708	0.0896751	0.0915517	0.0106323	0.00959871	0.00719764	0.00762894	0.0400814	0.0407104	0.00817464	0.00833837	0.24235	0.244086		403.6	-0.00248	0	-0.00932	0	-0.00504	0	-0.00884	0	-0.00927	0	-0.00408	0	-0.00091	0
403.8	0.0366253	0.0278751	0.0830655	0.0694515	0.43304	0.437654	1.19271	1.20285	0.901932	0.899568	0.0403272	0.0335683	0.156161	0.151428		403.8	0.50924	0.50708	0.0897156	0.0915524	0.0105597	0.00959907	0.00722246	0.00762927	0.039892	0.0407114	0.00795694	0.00833872	0.241811	0.244086		403.8	-0.002	0	-0.0094	0	-0.00549	0	-0.00911	0	-0.00975	0	-0.00439	0	-0.00121	0
404	0.0369677	0.0279085	0.0834165	0.0695325	0.433838	0.438056	1.19312	1.20292	0.903074	0.900022	0.0404772	0.0336082	0.156757	0.151595		404	0.509046	0.50708	0.0891216	0.0915532	0.00991921	0.00959943	0.00658073	0.00762961	0.0395616	0.0407125	0.00712559	0.00833907	0.241279	0.244086		404	-0.00174	0	-0.00959	0	-0.00568	0	-0.00954	0	-0.01014	0	-0.00513	0	-0.00104	0
404.2	0.0368043	0.0279419	0.0835264	0.0696135	0.433878	0.438458	1.19319	1.20299	0.903555	0.900475	0.0400627	0.0336481	0.156629	0.151761		404.2	0.509486	0.50708	0.089066	0.0915539	0.0100655	0.00959978	0.00673002	0.00762994	0.0397674	0.0407135	0.00680215	0.00833942	0.241356	0.244086		404.2	-0.00189	0	-0.0096	0	-0.00578	0	-0.0099	0	-0.01056	0	-0.00532	0	-0.00135	0
404.4	0.0357562	0.0279752	0.0828828	0.0696945	0.433704	0.438859	1.19273	1.20305	0.90381	0.900927	0.0393671	0.033688	0.156371	0.151928		404.4	0.509932	0.50708	0.0888656	0.0915546	0.010775	0.00960013	0.00685987	0.00763027	0.0397185	0.0407145	0.00670606	0.00833976	0.241429	0.244086		404.4	-0.00232	0	-0.00966	0	-0.00632	0	-0.01016	0	-0.01063	0	-0.00577	0	-0.00215	0
404.6	0.0359031	0.0280086	0.0831386	0.0697755	0.434518	0.43926	1.19298	1.20312	0.904518	0.901378	0.039501	0.0337279	0.156454	0.152094		404.6	0.509605	0.50708	0.0893063	0.0915554	0.0105576	0.00960048	0.00674616	0.00763059	0.0396409	0.0407156	0.00668336	0.00834011	0.241106	0.244086		404.6	-0.00256	0	-0.01003	0	-0.00654	0	-0.01061	0	-0.0113	0	-0.00607	0	-0.00285	0
404.8	0.0358945	0.0280419	0.0835271	0.0698565	0.435079	0.439661	1.19332	1.20318	0.905005	0.901828	0.0395279	0.0337679	0.15701	0.152261		404.8	0.510065	0.50708	0.0900678	0.0915561	0.0107024	0.00960083	0.00688412	0.00763092	0.0402615	0.0407166	0.00713905	0.00834045	0.241678	0.244086		404.8	-0.00283	0	-0.00985	0	-0.00637	0	-0.01132	0	-0.01151	0	-0.00678	0	-0.00309	0
405	0.0353238	0.0280753	0.0837253	0.0699375	0.435408	0.440062	1.19361	1.20325	0.905692	0.902277	0.0396697	0.0338078	0.157089	0.152427		405	0.510259	0.50708	0.0902514	0.0915568	0.0104753	0.00960117	0.00689072	0.00763124	0.0399711	0.0407176	0.0076192	0.00834079	0.241516	0.244086		405	-0.00262	0	-0.0099	0	-0.0063	0	-0.01107	0	-0.01141	0	-0.00676	0	-0.00336	0
405.2	0.0350568	0.0281086	0.0838784	0.0700185	0.436041	0.440462	1.1936	1.20331	0.905989	0.902726	0.0399046	0.0338477	0.156955	0.152594		405.2	0.51005	0.50708	0.0903733	0.0915575	0.0103762	0.00960152	0.00695555	0.00763156	0.0400402	0.0407186	0.00755946	0.00834112	0.241787	0.244086		405.2	-0.00317	0	-0.0101	0	-0.00577	0	-0.01133	0	-0.01139	0	-0.00703	0	-0.00333	0
405.4	0.0349989	0.028142	0.0839592	0.0700994	0.436364	0.440862	1.19383	1.20338	0.905937	0.903173	0.0398514	0.0338876	0.156548	0.15276		405.4	0.510199	0.50708	0.0899426	0.0915582	0.010084	0.00960186	0.00720597	0.00763188	0.0398523	0.0407196	0.00755619	0.00834146	0.241635	0.244086		405.4	-0.00371	0	-0.01052	0	-0.0056	0	-0.01135	0	-0.01123	0	-0.0075	0	-0.00382	0
405.6	0.0350878	0.0281753	0.0837462	0.0701804	0.436789	0.441262	1.19388	1.20344	0.906027	0.90362	0.0398324	0.0339275	0.156424	0.152926		405.6	0.510093	0.50708	0.0902381	0.0915589	0.010074	0.0096022	0.00696012	0.0076322	0.0402455	0.0407206	0.00770678	0.00834179	0.241622	0.244086		405.6	-0.00377	0	-0.01035	0	-0.0053	0	-0.0111	0	-0.01073	0	-0.00738	0	-0.00393	0
405.8	0.0348614	0.0282086	0.0831115	0.0702613	0.436886	0.441662	1.19352	1.2035	0.905601	0.904066	0.0392569	0.0339674	0.155772	0.153093		405.8	0.510561	0.50708	0.0904914	0.0915596	0.0098274	0.00960253	0.00756158	0.00763251	0.0403721	0.0407215	0.00816686	0.00834212	0.241856	0.244086		405.8	-0.00366	0	-0.01037	0	-0.00495	0	-0.011	0	-0.01077	0	-0.00706	0	-0.00334	0
406	0.0349874	0.028242	0.0833778	0.0703422	0.437675	0.442061	1.19419	1.20357	0.905843	0.904511	0.0397697	0.0340073	0.156072	0.153259		406	0.510893	0.50708	0.0898865	0.0915603	0.00951562	0.00960287	0.00728348	0.00763283	0.0403593	0.0407225	0.00806322	0.00834245	0.241811	0.244086		406	-0.00395	0	-0.01016	0	-0.00477	0	-0.01064	0	-0.01015	0	-0.00687	0	-0.00322	0
406.2	0.0354503	0.0282753	0.0830219	0.0704232	0.438556	0.44246	1.19472	1.20363	0.906005	0.904955	0.0402441	0.0340471	0.156213	0.153425		406.2	0.510734	0.50708	0.0902266	0.0915609	0.00961458	0.0096032	0.00701097	0.00763314	0.040161	0.0407235	0.00786153	0.00834278	0.241846	0.244086		406.2	-0.0047	0	-0.01023	0	-0.00499	0	-0.01008	0	-0.00971	0	-0.00675	0	-0.00324	0
406.4	0.0354252	0.0283087	0.082378	0.0705041	0.438409	0.442859	1.19392	1.20369	0.906034	0.905399	0.0405525	0.034087	0.155657	0.153591		406.4	0.510969	0.50708	0.0904135	0.0915616	0.0101675	0.00960353	0.00674304	0.00763345	0.0402985	0.0407244	0.00762059	0.0083431	0.242881	0.244086		406.4	-0.00479	0	-0.01032	0	-0.00511	0	-0.00967	0	-0.00979	0	-0.00676	0	-0.00327	0
406.6	0.0354379	0.028342	0.0818625	0.070585	0.438482	0.443257	1.19359	1.20375	0.905948	0.905841	0.0402143	0.0341269	0.155479	0.153757		406.6	0.510839	0.50708	0.0904391	0.0915623	0.0104473	0.00960386	0.00631274	0.00763376	0.0399173	0.0407254	0.00762094	0.00834342	0.243122	0.244086		406.6	-0.00543	0	-0.01073	0	-0.0056	0	-0.0099	0	-0.01008	0	-0.00692	0	-0.00375	0
406.8	0.0354127	0.0283754	0.0817292	0.0706659	0.438949	0.443655	1.19367	1.20382	0.906352	0.906283	0.0405756	0.0341668	0.155492	0.153924		406.8	0.510999	0.50708	0.0904966	0.0915629	0.010242	0.00960418	0.00641906	0.00763406	0.0397733	0.0407263	0.00769157	0.00834374	0.243442	0.244086		406.8	-0.00533	0	-0.01058	0	-0.00582	0	-0.01014	0	-0.01055	0	-0.00681	0	-0.00407	0
407	0.0354129	0.0284087	0.0815531	0.0707468	0.439602	0.444053	1.19382	1.20388	0.907014	0.906724	0.0404248	0.0342067	0.155484	0.15409		407	0.51114	0.50708	0.0906011	0.0915636	0.0106732	0.00960451	0.00624652	0.00763437	0.0402654	0.0407273	0.00777429	0.00834406	0.243826	0.244087		407	-0.00527	0	-0.01069	0	-0.0056	0	-0.00981	0	-0.01046	0	-0.00642	0	-0.00358	0
407.2	0.0357537	0.028442	0.0822256	0.0708276	0.440437	0.444451	1.19405	1.20394	0.907462	0.907164	0.040753	0.0342465	0.155685	0.154256		407.2	0.510815	0.50708	0.0905019	0.0915642	0.0101909	0.00960483	0.0059206	0.00763467	0.04049	0.0407282	0.00715398	0.00834438	0.244237	0.244087		407.2	-0.00504	0	-0.01092	0	-0.00542	0	-0.00941	0	-0.01092	0	-0.00686	0	-0.00339	0
407.4	0.0351635	0.0284753	0.0817787	0.0709085	0.439948	0.444848	1.19358	1.204	0.907931	0.907603	0.0404939	0.0342864	0.155893	0.154422		407.4	0.511583	0.50708	0.0908536	0.0915649	0.0107198	0.00960515	0.00635576	0.00763497	0.0404334	0.0407291	0.00739571	0.0083447	0.244284	0.244087		407.4	-0.00452	0	-0.01074	0	-0.00517	0	-0.00896	0	-0.01096	0	-0.00657	0	-0.00291	0
407.6	0.0353574	0.0285087	0.0819234	0.0709894	0.440826	0.445245	1.19352	1.20406	0.908518	0.908041	0.0403998	0.0343263	0.156413	0.154587		407.6	0.511096	0.50708	0.0910374	0.0915655	0.0103865	0.00960547	0.00615788	0.00763527	0.0400447	0.04073	0.0071702	0.00834501	0.243996	0.244087		407.6	-0.00456	0	-0.0104	0	-0.0048	0	-0.00919	0	-0.01085	0	-0.0068	0	-0.0026	0
407.8	0.0355155	0.028542	0.0822371	0.0710702	0.44122	0.445642	1.19364	1.20412	0.909461	0.908478	0.040797	0.0343662	0.157111	0.154753		407.8	0.510638	0.50708	0.0907733	0.0915661	0.0105549	0.00960578	0.00561833	0.00763556	0.0400599	0.040731	0.00686018	0.00834532	0.243742	0.244087		407.8	-0.00452	0	-0.01071	0	-0.00489	0	-0.00943	0	-0.01124	0	-0.0074	0	-0.00287	0
408	0.0353071	0.0285753	0.0820167	0.071151	0.441556	0.446039	1.19351	1.20418	0.910349	0.908915	0.0403611	0.034406	0.157754	0.154919		408	0.510917	0.50708	0.090347	0.0915668	0.0106051	0.0096061	0.00550681	0.00763586	0.039974	0.0407319	0.00648511	0.00834563	0.243657	0.244087		408	-0.00462	0	-0.01143	0	-0.00481	0	-0.00967	0	-0.01145	0	-0.00748	0	-0.00285	0
408.2	0.0353564	0.0286087	0.082342	0.0712319	0.442135	0.446435	1.19361	1.20424	0.911296	0.909351	0.0403489	0.0344459	0.158628	0.155085		408.2	0.511031	0.50708	0.0906577	0.0915674	0.0112	0.00960641	0.00594947	0.00763615	0.0399681	0.0407328	0.00651885	0.00834594	0.243849	0.244087		408.2	-0.00477	0	-0.0115	0	-0.00524	0	-0.01039	0	-0.01193	0	-0.00748	0	-0.00353	0
408.4	0.0351269	0.028642	0.0823186	0.0713127	0.441749	0.446831	1.19325	1.2043	0.911699	0.909786	0.0398679	0.0344858	0.159322	0.155251		408.4	0.510986	0.50708	0.0909274	0.091568	0.0114804	0.00960672	0.00595074	0.00763644	0.0398184	0.0407337	0.00674558	0.00834624	0.243713	0.244087		408.4	-0.00467	0	-0.01169	0	-0.00522	0	-0.0109	0	-0.01213	0	-0.00757	0	-0.0037	0
408.6	0.0355456	0.0286753	0.082759	0.0713935	0.442612	0.447227	1.19344	1.20436	0.912384	0.91022	0.039833	0.0345256	0.159917	0.155416		408.6	0.510807	0.50708	0.0910517	0.0915686	0.011653	0.00960702	0.00637486	0.00763673	0.0397793	0.0407346	0.00675271	0.00834655	0.243673	0.244087		408.6	-0.00356	0	-0.01177	0	-0.00493	0	-0.01115	0	-0.01214	0	-0.00721	0	-0.00326	0
408.8	0.0357086	0.0287086	0.0831875	0.0714743	0.442581	0.447623	1.19349	1.20441	0.912602	0.910653	0.0393416	0.0345655	0.160336	0.155582		408.8	0.51062	0.50708	0.0915342	0.0915692	0.0113092	0.00960733	0.00639541	0.00763702	0.0399081	0.0407354	0.00660168	0.00834685	0.243641	0.244087		408.8	-0.00353	0	-0.0121	0	-0.00471	0	-0.01185	0	-0.01226	0	-0.00724	0	-0.00316	0
409	0.0351529	0.0287419	0.0829447	0.0715551	0.44241	0.448018	1.19311	1.20447	0.912283	0.911086	0.0391186	0.0346053	0.160247	0.155748		409	0.51074	0.50708	0.0914575	0.0915698	0.0115086	0.00960764	0.00608137	0.00763731	0.0393377	0.0407363	0.00639793	0.00834715	0.243561	0.244087		409	-0.00275	0	-0.01204	0	-0.0041	0	-0.01144	0	-0.01204	0	-0.00685	0	-0.00244	0
409.2	0.0350588	0.0287753	0.0827836	0.0716359	0.442421	0.448413	1.19313	1.20453	0.912051	0.911517	0.0392488	0.0346452	0.159647	0.155913		409.2	0.510458	0.50708	0.0906074	0.0915704	0.0111403	0.00960794	0.00613274	0.00763759	0.0390676	0.0407372	0.00618611	0.00834745	0.24268	0.244087		409.2	-0.00273	0	-0.01202	0	-0.00386	0	-0.01158	0	-0.01196	0	-0.00699	0	-0.0026	0
409.4	0.0357334	0.0288086	0.0826758	0.0717167	0.442894	0.448808	1.19419	1.20459	0.912177	0.911948	0.0394529	0.034685	0.160306	0.156079		409.4	0.510835	0.50708	0.0905106	0.091571	0.0109766	0.00960824	0.00651031	0.00763788	0.0390721	0.040738	0.00639987	0.00834774	0.242226	0.244087		409.4	-0.00309	0	-0.01254	0	-0.00452	0	-0.01209	0	-0.01217	0	-0.00739	0	-0.00305	0
409.6	0.0353381	0.0288419	0.0822819	0.0717975	0.442673	0.449202	1.19406	1.20464	0.912631	0.912378	0.0394987	0.0347249	0.16027	0.156244		409.6	0.510867	0.50708	0.0899966	0.0915716	0.0105798	0.00960854	0.00652107	0.00763816	0.0390217	0.0407389	0.00636672	0.00834804	0.242198	0.244087		409.6	-0.003	0	-0.01302	0	-0.00522	0	-0.01215	0	-0.01248	0	-0.00776	0	-0.00365	0
409.8	0.0349775	0.0288752	0.0817469	0.0718782	0.442557	0.449597	1.1943	1.2047	0.912284	0.912807	0.0391897	0.0347647	0.159957	0.15641		409.8	0.511064	0.50708	0.0893898	0.0915722	0.0101371	0.00960883	0.0069082	0.00763844	0.038649	0.0407398	0.00618002	0.00834833	0.241927	0.244087		409.8	-0.00207	0	-0.01186	0	-0.00398	0	-0.0107	0	-0.01168	0	-0.00635	0	-0.00203	0
410	0.035529	0.0289085	0.0819309	0.071959	0.442866	0.449991	1.19514	1.20476	0.913181	0.913236	0.0395462	0.0348045	0.160218	0.156575		410	0.511174	0.50708	0.0889335	0.0915728	0.0101851	0.00960913	0.00696461	0.00763872	0.0386662	0.0407406	0.00593262	0.00834862	0.241838	0.244087		410	-0.00338	0	-0.01249	0	-0.00505	0	-0.01131	0	-0.0123	0	-0.00699	0	-0.0033	0
410.2	0.0357807	0.0289418	0.0815452	0.0720397	0.442886	0.450384	1.19487	1.20481	0.913146	0.913663	0.039662	0.0348444	0.159695	0.156741		410.2	0.511158	0.50708	0.0888995	0.0915733	0.0100051	0.00960942	0.00706409	0.00763899	0.0385419	0.0407414	0.00578408	0.00834891	0.242267	0.244087		410.2	-0.00354	0	-0.01316	0	-0.00588	0	-0.01165	0	-0.01272	0	-0.00719	0	-0.00368	0
410.4	0.0357717	0.0289751	0.0813875	0.0721205	0.442913	0.450778	1.19463	1.20487	0.913734	0.91409	0.0398702	0.0348842	0.159642	0.156906		410.4	0.510999	0.50708	0.0884247	0.0915739	0.00989803	0.00960971	0.00686911	0.00763927	0.0380452	0.0407423	0.0058702	0.0083492	0.242336	0.244087		410.4	-0.00406	0	-0.01342	0	-0.00663	0	-0.01235	0	-0.01355	0	-0.00778	0	-0.00447	0
410.6	0.0358586	0.0290084	0.0812382	0.0722012	0.443131	0.451171	1.19505	1.20492	0.913596	0.914516	0.0399043	0.034924	0.159525	0.157071		410.6	0.510959	0.50708	0.0883185	0.0915745	0.0100348	0.00961	0.00740176	0.00763954	0.0380588	0.0407431	0.0061165	0.00834948	0.242459	0.244087		410.6	-0.00424	0	-0.01319	0	-0.00669	0	-0.01255	0	-0.01361	0	-0.00771	0	-0.00455	0
410.8	0.0356868	0.0290417	0.0809745	0.0722819	0.443603	0.451564	1.19549	1.20498	0.914024	0.914941	0.0400918	0.0349639	0.159322	0.157237		410.8	0.510629	0.50708	0.0880219	0.091575	0.00944338	0.00961029	0.00743833	0.00763981	0.0378298	0.0407439	0.00590914	0.00834977	0.242422	0.244087		410.8	-0.00418	0	-0.01297	0	-0.00674	0	-0.01264	0	-0.01396	0	-0.00737	0	-0.00458	0
411	0.0352658	0.029075	0.0808757	0.0723626	0.443461	0.451957	1.19581	1.20503	0.914514	0.915365	0.0399017	0.0350037	0.158967	0.157402		411	0.510817	0.50708	0.0885635	0.0915756	0.00903552	0.00961057	0.00768058	0.00764008	0.0381614	0.0407448	0.006128	0.00835005	0.242366	0.244087		411	-0.00457	0	-0.01301	0	-0.00692	0	-0.01268	0	-0.01382	0	-0.00785	0	-0.00442	0
411.2	0.0354008	0.0291083	0.0811184	0.0724433	0.44424	0.452349	1.19611	1.20509	0.914694	0.915789	0.0398526	0.0350435	0.158961	0.157567		411.2	0.510319	0.50708	0.0884876	0.0915761	0.00791821	0.00961086	0.00732057	0.00764035	0.0379748	0.0407456	0.0053762	0.00835033	0.242076	0.244087		411.2	-0.00481	0	-0.01256	0	-0.0071	0	-0.01272	0	-0.01421	0	-0.00831	0	-0.00457	0
411.4	0.0356479	0.0291416	0.0807829	0.072524	0.444678	0.452741	1.19619	1.20514	0.91529	0.916212	0.0401107	0.0350834	0.159056	0.157732		411.4	0.510681	0.50708	0.0890007	0.0915767	0.00838451	0.00961114	0.0072178	0.00764061	0.0385028	0.0407464	0.00550534	0.00835061	0.241729	0.244087		411.4	-0.00494	0	-0.01169	0	-0.00669	0	-0.01182	0	-0.01355	0	-0.00767	0	-0.00387	0
411.6	0.036216	0.0291749	0.0811859	0.0726047	0.44563	0.453133	1.19629	1.2052	0.915386	0.916633	0.0403875	0.0351232	0.15945	0.157897		411.6	0.51027	0.50708	0.0894914	0.0915772	0.0082196	0.00961142	0.00662345	0.00764088	0.038256	0.0407472	0.00513289	0.00835089	0.241485	0.244087		411.6	-0.00509	0	-0.01138	0	-0.00653	0	-0.01181	0	-0.01317	0	-0.00778	0	-0.00365	0
411.8	0.0357134	0.0292082	0.081239	0.0726853	0.445832	0.453525	1.19611	1.20525	0.915765	0.917054	0.0406338	0.035163	0.159494	0.158062		411.8	0.510178	0.50708	0.0893733	0.0915777	0.00847259	0.0096117	0.00619219	0.00764114	0.0384114	0.040748	0.00525153	0.00835116	0.241215	0.244087		411.8	-0.00469	0	-0.01135	0	-0.00665	0	-0.01128	0	-0.01286	0	-0.0076	0	-0.00373	0
412	0.0363283	0.0292415	0.0813657	0.072766	0.446433	0.453916	1.19607	1.2053	0.91626	0.917475	0.0407662	0.0352028	0.15986	0.158227		412	0.510378	0.50708	0.0893677	0.0915783	0.0086178	0.00961198	0.00655679	0.0076414	0.0384832	0.0407488	0.00561215	0.00835144	0.241445	0.244087		412	-0.00501	0	-0.0115	0	-0.00661	0	-0.01114	0	-0.01241	0	-0.00723	0	-0.00362	0
412.2	0.0362394	0.0292748	0.0818776	0.0728467	0.447352	0.454307	1.19624	1.20536	0.916635	0.917894	0.0403677	0.0352426	0.160328	0.158392		412.2	0.510683	0.50708	0.0902171	0.0915788	0.00922139	0.00961225	0.00650919	0.00764166	0.0389564	0.0407496	0.00622729	0.00835171	0.241793	0.244087		412.2	-0.00482	0	-0.01073	0	-0.00613	0	-0.01076	0	-0.01166	0	-0.00666	0	-0.00328	0
412.4	0.0359924	0.0293081	0.0817348	0.0729273	0.447389	0.454698	1.19596	1.20541	0.916411	0.918313	0.040059	0.0352824	0.160319	0.158557		412.4	0.510469	0.50708	0.0901895	0.0915793	0.00941603	0.00961253	0.005908	0.00764192	0.0389555	0.0407503	0.00642095	0.00835198	0.241576	0.244087		412.4	-0.00431	0	-0.01064	0	-0.00553	0	-0.01072	0	-0.01131	0	-0.00658	0	-0.00278	0
412.6	0.0356259	0.0293414	0.0824339	0.073008	0.448125	0.455089	1.19614	1.20546	0.91676	0.918731	0.0402301	0.0353222	0.160456	0.158722		412.6	0.510364	0.50708	0.0902555	0.0915798	0.00972995	0.0096128	0.00586664	0.00764218	0.0390552	0.0407511	0.00680171	0.00835225	0.242099	0.244088		412.6	-0.00395	0	-0.01084	0	-0.0055	0	-0.01056	0	-0.01074	0	-0.00656	0	-0.00261	0
412.8	0.0357729	0.0293747	0.0833504	0.0730886	0.448538	0.455479	1.19674	1.20551	0.917369	0.919148	0.0406769	0.035362	0.160573	0.158887		412.8	0.510623	0.50708	0.0905612	0.0915803	0.00970758	0.00961307	0.0055072	0.00764244	0.0390126	0.0407519	0.00689791	0.00835252	0.24223	0.244088		412.8	-0.0037	0	-0.01068	0	-0.00483	0	-0.01041	0	-0.01033	0	-0.00634	0	-0.00273	0
413	0.0348223	0.029408	0.0833946	0.0731692	0.448546	0.455869	1.19653	1.20556	0.917779	0.919564	0.0407496	0.0354018	0.1605	0.159052		413	0.5112	0.50708	0.090645	0.0915808	0.0104668	0.00961334	0.00518631	0.00764269	0.0388059	0.0407527	0.00741457	0.00835278	0.242642	0.244088		413	-0.00335	0	-0.01036	0	-0.00467	0	-0.01005	0	-0.00983	0	-0.00634	0	-0.00246	0
413.2	0.0352024	0.0294412	0.0841874	0.0732498	0.449387	0.456259	1.19709	1.20562	0.918838	0.919979	0.0413301	0.0354416	0.161198	0.159216		413.2	0.511312	0.50708	0.0904944	0.0915813	0.0106109	0.0096136	0.00527068	0.00764294	0.0386942	0.0407534	0.00802156	0.00835305	0.242447	0.244088		413.2	-0.00407	0	-0.01082	0	-0.00454	0	-0.01018	0	-0.00994	0	-0.00643	0	-0.00325	0
413.4	0.035671	0.0294745	0.0850041	0.0733304	0.450584	0.456648	1.19802	1.20567	0.920307	0.920394	0.0417768	0.0354814	0.161992	0.159381		413.4	0.511625	0.50708	0.0906967	0.0915818	0.0106029	0.00961387	0.00534567	0.00764319	0.0392834	0.0407542	0.00798574	0.00835331	0.242983	0.244088		413.4	-0.0043	0	-0.01124	0	-0.00485	0	-0.01029	0	-0.01002	0	-0.00695	0	-0.00352	0
413.6	0.0353968	0.0295078	0.0852892	0.073411	0.450904	0.457038	1.19768	1.20572	0.921113	0.920808	0.0414622	0.0355212	0.161726	0.159546		413.6	0.511972	0.50708	0.0906862	0.0915823	0.0107933	0.00961413	0.00503168	0.00764344	0.0388576	0.0407549	0.00785528	0.00835357	0.243003	0.244088		413.6	-0.0037	0	-0.01139	0	-0.00432	0	-0.00957	0	-0.00959	0	-0.00657	0	-0.00305	0
413.8	0.0352755	0.0295411	0.0857579	0.0734916	0.450726	0.457427	1.19818	1.20577	0.921853	0.921221	0.0410161	0.035561	0.16164	0.15971		413.8	0.511792	0.50708	0.0909177	0.0915828	0.011175	0.00961439	0.00519147	0.00764369	0.0385774	0.0407557	0.00743136	0.00835383	0.242964	0.244088		413.8	-0.00273	0	-0.01061	0	-0.00291	0	-0.00882	0	-0.00916	0	-0.00603	0	-0.00193	0
414	0.0354535	0.0295744	0.0860479	0.0735722	0.450997	0.457816	1.19826	1.20582	0.922897	0.921633	0.0408365	0.0356008	0.161722	0.159875		414	0.511895	0.50708	0.0910726	0.0915833	0.0112462	0.00961465	0.00499517	0.00764394	0.0384158	0.0407564	0.00738241	0.00835409	0.243729	0.244088		414	-0.00401	0	-0.01213	0	-0.0042	0	-0.0102	0	-0.01028	0	-0.00711	0	-0.0032	0
414.2	0.0353447	0.0296076	0.0859865	0.0736527	0.451079	0.458204	1.19764	1.20587	0.923512	0.922045	0.0405676	0.0356406	0.161693	0.16004		414.2	0.51188	0.50708	0.0913058	0.0915838	0.0113237	0.00961491	0.00491013	0.00764418	0.0379618	0.0407571	0.00728617	0.00835434	0.244008	0.244088		414.2	-0.00296	0	-0.01175	0	-0.00386	0	-0.00994	0	-0.00985	0	-0.00679	0	-0.00251	0
414.4	0.0351292	0.0296409	0.085709	0.0737333	0.451437	0.458592	1.1975	1.20592	0.924519	0.922455	0.0405257	0.0356804	0.161762	0.160204		414.4	0.511553	0.50708	0.0914422	0.0915843	0.0112939	0.00961517	0.00509082	0.00764442	0.0378028	0.0407579	0.00731279	0.0083546	0.244098	0.244088		414.4	-0.00246	0	-0.01167	0	-0.00395	0	-0.00988	0	-0.01006	0	-0.0067	0	-0.00234	0
414.6	0.0345644	0.0296742	0.0852791	0.0738138	0.451444	0.45898	1.19732	1.20597	0.924932	0.922865	0.0397678	0.0357202	0.160949	0.160369		414.6	0.511505	0.50708	0.0916287	0.0915847	0.011025	0.00961542	0.00572668	0.00764467	0.0380501	0.0407586	0.00718396	0.00835485	0.244151	0.244088		414.6	-0.00157	0	-0.01153	0	-0.00371	0	-0.0093	0	-0.00962	0	-0.00625	0	-0.00178	0
414.8	0.0350659	0.0297075	0.0855894	0.0738944	0.452146	0.459368	1.19787	1.20602	0.925752	0.923275	0.0396773	0.0357599	0.161379	0.160533		414.8	0.511116	0.50708	0.0913765	0.0915852	0.0103941	0.00961568	0.00584719	0.00764491	0.0380606	0.0407593	0.00633329	0.0083551	0.244068	0.244088		414.8	-0.00146	0	-0.01146	0	-0.00401	0	-0.009	0	-0.00982	0	-0.00598	0	-0.00178	0
415	0.0353727	0.0297407	0.0857265	0.0739749	0.452587	0.459756	1.19804	1.20607	0.92618	0.923683	0.0394412	0.0357997	0.161438	0.160697		415	0.511297	0.50708	0.0912744	0.0915857	0.0100102	0.00961593	0.00643714	0.00764515	0.0384939	0.04076	0.00630072	0.00835535	0.243961	0.244088		415	-0.00176	0	-0.01169	0	-0.00445	0	-0.00906	0	-0.00995	0	-0.00643	0	-0.00181	0
415.2	0.0359047	0.029774	0.0857985	0.0740554	0.45353	0.460143	1.19835	1.20611	0.926033	0.92409	0.0397339	0.0358395	0.161528	0.160862		415.2	0.511158	0.50708	0.0911028	0.0915861	0.0101381	0.00961618	0.00649206	0.00764538	0.0383673	0.0407607	0.00568082	0.0083556	0.243486	0.244088		415.2	-0.00177	0	-0.0119	0	-0.00483	0	-0.00827	0	-0.0102	0	-0.00581	0	-0.00173	0
415.4	0.0363733	0.0298073	0.0854033	0.0741359	0.453515	0.46053	1.19841	1.20616	0.925968	0.924497	0.0401539	0.0358793	0.16121	0.161026		415.4	0.511786	0.50708	0.0914429	0.0915866	0.0106012	0.00961643	0.00683474	0.00764562	0.0388422	0.0407614	0.00562766	0.00835585	0.243471	0.244088		415.4	-0.00154	0	-0.01175	0	-0.00461	0	-0.00798	0	-0.01004	0	-0.00525	0	-0.00223	0
415.6	0.0365537	0.0298405	0.085506	0.0742164	0.45365	0.460917	1.19817	1.20621	0.925569	0.924903	0.0402187	0.0359191	0.161251	0.16119		415.6	0.511863	0.50708	0.0917503	0.0915871	0.0104025	0.00961668	0.00698928	0.00764585	0.0386974	0.0407621	0.00576952	0.00835609	0.243369	0.244088		415.6	-0.00124	0	-0.01192	0	-0.00514	0	-0.00797	0	-0.01074	0	-0.00566	0	-0.00168	0
415.8	0.0372769	0.0298738	0.0855437	0.0742969	0.454477	0.461303	1.19865	1.20626	0.925683	0.925309	0.0401778	0.0359588	0.161662	0.161355		415.8	0.511901	0.50708	0.0913818	0.0915875	0.0103013	0.00961692	0.00730784	0.00764609	0.0387096	0.0407628	0.00613769	0.00835634	0.243391	0.244088		415.8	-0.00152	0	-0.01189	0	-0.0054	0	-0.00811	0	-0.01122	0	-0.00561	0	-0.00166	0
416	0.0376933	0.0299071	0.0849701	0.0743774	0.454526	0.461689	1.19785	1.20631	0.92514	0.925713	0.0395493	0.0359986	0.161491	0.161519		416	0.511935	0.50708	0.0913321	0.091588	0.0103924	0.00961717	0.00775065	0.00764632	0.0387095	0.0407635	0.00591009	0.00835658	0.243072	0.244088		416	-0.00184	0	-0.01159	0	-0.00553	0	-0.00828	0	-0.01082	0	-0.00533	0	-0.00137	0
416.2	0.0372938	0.0299403	0.0847402	0.0744579	0.455048	0.462075	1.19827	1.20635	0.925072	0.926117	0.0394568	0.0360383	0.161669	0.161683		416.2	0.511894	0.50708	0.0911414	0.0915884	0.0102315	0.00961741	0.0078271	0.00764655	0.0390495	0.0407642	0.00577015	0.00835682	0.242565	0.244088		416.2	-0.00198	0	-0.01139	0	-0.00529	0	-0.00839	0	-0.01057	0	-0.00535	0	-0.00094	0
416.4	0.0379272	0.0299736	0.0845141	0.0745384	0.455628	0.462461	1.19824	1.2064	0.924784	0.92652	0.0397983	0.0360781	0.161858	0.161847		416.4	0.511746	0.50708	0.0906255	0.0915888	0.0100344	0.00961765	0.007501	0.00764678	0.0392518	0.0407649	0.00581373	0.00835706	0.242752	0.244088		416.4	-0.00235	0	-0.01189	0	-0.00603	0	-0.00941	0	-0.01089	0	-0.0062	0	-0.00131	0
416.6	0.0376951	0.0300068	0.0849405	0.0746188	0.456405	0.462846	1.19833	1.20645	0.924998	0.926922	0.0400938	0.0361178	0.161904	0.162011		416.6	0.512098	0.50708	0.0903099	0.0915893	0.0098473	0.00961789	0.00781694	0.00764701	0.0393946	0.0407656	0.00615179	0.0083573	0.242647	0.244088		416.6	-0.00268	0	-0.01215	0	-0.00633	0	-0.00998	0	-0.0112	0	-0.00644	0	-0.00139	0
416.8	0.0382268	0.0300401	0.085174	0.0746993	0.457068	0.463232	1.19886	1.20649	0.925679	0.927323	0.0404048	0.0361576	0.162216	0.162175		416.8	0.512317	0.50708	0.0903076	0.0915897	0.00965482	0.00961813	0.00792737	0.00764723	0.0391469	0.0407662	0.00668135	0.00835753	0.242877	0.244088		416.8	-0.00311	0	-0.0122	0	-0.00626	0	-0.011	0	-0.01153	0	-0.00662	0	-0.00171	0
417	0.0380294	0.0300733	0.0845582	0.0747797	0.457502	0.463616	1.19851	1.20654	0.926044	0.927724	0.0399041	0.0361974	0.162245	0.162339		417	0.512257	0.50708	0.0899147	0.0915901	0.00958505	0.00961836	0.00755702	0.00764746	0.0387898	0.0407669	0.00719865	0.00835777	0.242923	0.244088		417	-0.00422	0	-0.01265	0	-0.00677	0	-0.01212	0	-0.0118	0	-0.00711	0	-0.00201	0
417.2	0.0386818	0.0301066	0.0846975	0.0748601	0.458154	0.464001	1.19856	1.20659	0.926719	0.928124	0.0400032	0.0362371	0.162929	0.162503		417.2	0.512445	0.50708	0.08978	0.0915906	0.00973553	0.0096186	0.00757749	0.00764768	0.038835	0.0407676	0.00751118	0.008358	0.242689	0.244088		417.2	-0.00517	0	-0.01305	0	-0.00676	0	-0.01236	0	-0.01207	0	-0.00746	0	-0.00188	0
417.4	0.0384531	0.0301398	0.084171	0.0749406	0.457962	0.464386	1.19842	1.20663	0.927241	0.928523	0.0401719	0.0362768	0.162544	0.162667		417.4	0.512448	0.50708	0.089453	0.091591	0.00940039	0.00961883	0.00721233	0.0076479	0.0387053	0.0407682	0.00712987	0.00835824	0.242479	0.244088		417.4	-0.00505	0	-0.01284	0	-0.00661	0	-0.01259	0	-0.01168	0	-0.00779	0	-0.00147	0
417.6	0.0385995	0.0301731	0.083823	0.075021	0.458035	0.46477	1.19811	1.20668	0.927301	0.928921	0.0400091	0.0363166	0.162905	0.162831		417.6	0.512303	0.50708	0.0889272	0.0915914	0.0096184	0.00961907	0.00669326	0.00764813	0.0376358	0.0407689	0.00742582	0.00835847	0.242253	0.244088		417.6	-0.005	0	-0.01296	0	-0.00622	0	-0.01269	0	-0.01168	0	-0.00751	0	-0.00123	0
417.8	0.0381107	0.0302063	0.0835765	0.0751014	0.457874	0.465154	1.19835	1.20672	0.928247	0.929319	0.0398926	0.0363563	0.163253	0.162995		417.8	0.512299	0.50708	0.0887618	0.0915918	0.00956087	0.0096193	0.00660131	0.00764835	0.0374069	0.0407695	0.00777017	0.0083587	0.242615	0.244088		417.8	-0.00462	0	-0.01249	0	-0.00519	0	-0.0129	0	-0.0115	0	-0.00729	0	-0.00125	0
418	0.0382179	0.0302396	0.0831324	0.0751818	0.458141	0.465537	1.19792	1.20677	0.929065	0.929716	0.0401279	0.0363961	0.163617	0.163158		418	0.512286	0.50708	0.0890912	0.0915922	0.00982487	0.00961953	0.00688138	0.00764856	0.0375159	0.0407702	0.0085595	0.00835893	0.243403	0.244088		418	-0.00529	0	-0.01296	0	-0.0057	0	-0.01316	0	-0.01176	0	-0.0079	0	-0.00162	0
418.2	0.0380795	0.0302728	0.0828521	0.0752622	0.458444	0.465921	1.19769	1.20681	0.929903	0.930112	0.0400144	0.0364358	0.163823	0.163322		418.2	0.512048	0.50708	0.089469	0.0915926	0.0100801	0.00961975	0.00702767	0.00764878	0.0377602	0.0407708	0.0085908	0.00835915	0.243291	0.244088		418.2	-0.00479	0	-0.01248	0	-0.00523	0	-0.01296	0	-0.01143	0	-0.00775	0	-0.00179	0
418.4	0.0377218	0.0303061	0.0832354	0.0753425	0.458932	0.466304	1.19799	1.20686	0.930395	0.930507	0.0404909	0.0364756	0.164399	0.163486		418.4	0.512063	0.50708	0.0894951	0.091593	0.0100768	0.00961998	0.00722842	0.007649	0.0384527	0.0407715	0.00878574	0.00835938	0.243209	0.244088		418.4	-0.00465	0	-0.01271	0	-0.00554	0	-0.01333	0	-0.01187	0	-0.00818	0	-0.00242	0
418.6	0.0372018	0.0303393	0.0834878	0.0754229	0.459179	0.466687	1.1984	1.2069	0.931082	0.930901	0.0406983	0.0365153	0.16487	0.16365		418.6	0.512108	0.50708	0.089444	0.0915934	0.0101065	0.00962021	0.0076498	0.00764921	0.0383084	0.0407721	0.00874157	0.0083596	0.24357	0.244088		418.6	-0.00424	0	-0.01306	0	-0.0052	0	-0.01289	0	-0.01169	0	-0.00786	0	-0.0028	0
418.8	0.0378634	0.0303726	0.0843525	0.0755033	0.459988	0.467069	1.19892	1.20694	0.931934	0.931295	0.0414103	0.036555	0.165894	0.163813		418.8	0.512578	0.50708	0.0899459	0.0915938	0.0106196	0.00962043	0.00790993	0.00764942	0.0386655	0.0407727	0.00867043	0.00835982	0.243995	0.244088		418.8	-0.00414	0	-0.01326	0	-0.00511	0	-0.01269	0	-0.01198	0	-0.00739	0	-0.00332	0
419	0.0376707	0.0304058	0.0844163	0.0755836	0.460209	0.467452	1.19923	1.20699	0.932365	0.931688	0.0415413	0.0365947	0.166155	0.163977		419	0.512397	0.50708	0.0899613	0.0915942	0.0106816	0.00962065	0.00775693	0.00764964	0.0383255	0.0407733	0.00869942	0.00836005	0.243396	0.244088		419	-0.00424	0	-0.01365	0	-0.00508	0	-0.01292	0	-0.01257	0	-0.00747	0	-0.00432	0
419.2	0.0376998	0.030439	0.0849866	0.075664	0.460681	0.467834	1.19985	1.20703	0.933283	0.932081	0.0420885	0.0366344	0.166084	0.16414		419.2	0.512731	0.50708	0.0906109	0.0915946	0.0110042	0.00962087	0.00785193	0.00764985	0.0385332	0.040774	0.00858469	0.00836027	0.243798	0.244088		419.2	-0.00388	0	-0.01322	0	-0.00538	0	-0.01259	0	-0.01258	0	-0.00692	0	-0.00498	0
419.4	0.037363	0.0304723	0.0851331	0.0757443	0.460556	0.468216	1.19981	1.20707	0.933059	0.932472	0.0418504	0.0366742	0.165676	0.164304		419.4	0.513341	0.50708	0.0912144	0.091595	0.0112815	0.00962109	0.00800857	0.00765006	0.0392399	0.0407746	0.00916438	0.00836048	0.244496	0.244088		419.4	-0.00349	0	-0.0127	0	-0.00522	0	-0.0124	0	-0.01269	0	-0.00682	0	-0.0055	0
419.6	0.0375234	0.0305055	0.0858226	0.0758246	0.461388	0.468597	1.20009	1.20712	0.933403	0.932863	0.0424065	0.0367139	0.166237	0.164467		419.6	0.51344	0.50708	0.0919857	0.0915954	0.0112902	0.00962131	0.00760974	0.00765026	0.0395415	0.0407752	0.00921539	0.0083607	0.244127	0.244088		419.6	-0.00239	0	-0.01246	0	-0.00509	0	-0.0116	0	-0.01292	0	-0.00619	0	-0.00367	0
419.8	0.0372726	0.0305387	0.0859215	0.075905	0.461843	0.468979	1.20006	1.20716	0.93365	0.933253	0.0419289	0.0367536	0.166498	0.164631		419.8	0.513366	0.50708	0.0918737	0.0915958	0.0109392	0.00962153	0.00751349	0.00765047	0.0395234	0.0407758	0.00891526	0.00836092	0.243718	0.244088		419.8	-0.00217	0	-0.01219	0	-0.00505	0	-0.01126	0	-0.01334	0	-0.00615	0	-0.00386	0
420	0.0369119	0.030572	0.0860772	0.0759853	0.461775	0.46936	1.19999	1.2072	0.933592	0.933642	0.041667	0.0367933	0.16631	0.164794		420	0.513051	0.50708	0.0921286	0.0915961	0.010754	0.00962174	0.00734145	0.00765068	0.0396327	0.0407764	0.00824579	0.00836113	0.243574	0.244088		420	-0.00156	0	-0.01207	0	-0.00513	0	-0.01103	0	-0.01305	0	-0.00637	0	-0.00381	0
420.2	0.0365933	0.0306052	0.0864457	0.0760656	0.46244	0.469741	1.20063	1.20724	0.933918	0.934031	0.0419264	0.036833	0.166341	0.164957		420.2	0.512862	0.50708	0.0922653	0.0915965	0.0105816	0.00962196	0.00718097	0.00765088	0.0399519	0.040777	0.00794968	0.00836135	0.243708	0.244088		420.2	-0.00149	0	-0.01207	0	-0.00498	0	-0.01074	0	-0.01321	0	-0.00657	0	-0.00384	0
420.4	0.036289	0.0306384	0.0864549	0.0761459	0.462595	0.470121	1.20001	1.20729	0.93345	0.934419	0.0413241	0.0368727	0.166154	0.165121		420.4	0.5127	0.50708	0.0917957	0.0915969	0.01074	0.00962217	0.00674712	0.00765108	0.0395629	0.0407776	0.00739015	0.00836156	0.243401	0.244088		420.4	-0.00119	0	-0.01124	0	-0.0048	0	-0.01065	0	-0.01301	0	-0.00652	0	-0.00408	0
420.6	0.036084	0.0306716	0.0863802	0.0762261	0.462719	0.470502	1.2	1.20733	0.933756	0.934806	0.0412949	0.0369124	0.165853	0.165284		420.6	0.512781	0.50708	0.0912331	0.0915972	0.0108287	0.00962238	0.00688527	0.00765129	0.0390503	0.0407782	0.00756283	0.00836177	0.243078	0.244088		420.6	-0.00176	0	-0.0112	0	-0.00477	0	-0.01102	0	-0.01347	0	-0.00665	0	-0.00413	0
420.8	0.0363671	0.0307048	0.086226	0.0763064	0.462916	0.470882	1.1999	1.20737	0.933947	0.935192	0.0412603	0.0369522	0.16562	0.165447		420.8	0.512295	0.50708	0.0912132	0.0915976	0.0104898	0.00962259	0.00653501	0.00765149	0.0385856	0.0407788	0.0073673	0.00836198	0.243387	0.244088		420.8	-0.00241	0	-0.01134	0	-0.00505	0	-0.01125	0	-0.01356	0	-0.00691	0	-0.00425	0
421	0.0363568	0.0307381	0.0861638	0.0763867	0.463636	0.471261	1.19983	1.20741	0.934603	0.935578	0.0412361	0.0369918	0.16535	0.16561		421	0.512301	0.50708	0.0908651	0.091598	0.0103867	0.0096228	0.0063358	0.00765169	0.0383886	0.0407794	0.00718325	0.00836219	0.243517	0.244088		421	-0.00277	0	-0.01108	0	-0.00511	0	-0.01097	0	-0.01333	0	-0.00687	0	-0.00383	0
421.2	0.0370196	0.0307713	0.0867398	0.0764669	0.464139	0.471641	1.19965	1.20745	0.935448	0.935963	0.0417455	0.0370316	0.165845	0.165773		421.2	0.512285	0.50708	0.0908725	0.0915983	0.0103733	0.00962301	0.00622813	0.00765189	0.0384011	0.0407799	0.00732172	0.00836239	0.243571	0.244088		421.2	-0.00318	0	-0.01103	0	-0.00547	0	-0.01113	0	-0.01325	0	-0.00707	0	-0.00361	0
421.4	0.0372953	0.0308045	0.0868692	0.0765472	0.464564	0.47202	1.2	1.20749	0.936386	0.936347	0.0424791	0.0370712	0.166102	0.165936		421.4	0.511763	0.50708	0.0902651	0.0915987	0.00978266	0.00962321	0.00571361	0.00765208	0.0380702	0.0407805	0.00705043	0.0083626	0.243455	0.244088		421.4	-0.00302	0	-0.01054	0	-0.00513	0	-0.01123	0	-0.01264	0	-0.00704	0	-0.00331	0
421.6	0.0374105	0.0308377	0.0866452	0.0766274	0.465194	0.4724	1.20028	1.20753	0.936637	0.93673	0.0421006	0.0371109	0.166684	0.1661		421.6	0.51148	0.50708	0.0897739	0.091599	0.00969294	0.00962342	0.00526672	0.00765228	0.0376607	0.0407811	0.00718807	0.0083628	0.243481	0.244089		421.6	-0.0034	0	-0.01058	0	-0.00541	0	-0.01134	0	-0.01255	0	-0.00708	0	-0.0038	0
421.8	0.0373566	0.0308709	0.0865888	0.0767076	0.465527	0.472778	1.20052	1.20757	0.937392	0.937113	0.0422375	0.0371506	0.167107	0.166263		421.8	0.51176	0.50708	0.0899695	0.0915994	0.00984215	0.00962362	0.0058885	0.00765247	0.0380875	0.0407817	0.00777142	0.00836301	0.244024	0.244089		421.8	-0.00366	0	-0.0108	0	-0.0056	0	-0.01167	0	-0.01206	0	-0.00736	0	-0.00408	0
422	0.0374904	0.0309041	0.0864701	0.0767879	0.465737	0.473157	1.20063	1.20761	0.937708	0.937495	0.0423164	0.0371903	0.167299	0.166425		422	0.511173	0.50708	0.090056	0.0915997	0.00972305	0.00962383	0.00593303	0.00765267	0.0383696	0.0407822	0.00748618	0.00836321	0.244054	0.244089		422	-0.00481	0	-0.0111	0	-0.00643	0	-0.01192	0	-0.01237	0	-0.00827	0	-0.00486	0
422.2	0.0373793	0.0309374	0.0869741	0.0768681	0.466791	0.473535	1.20117	1.20765	0.938237	0.937876	0.0428895	0.03723	0.168315	0.166588		422.2	0.511322	0.50708	0.090357	0.0916001	0.00968783	0.00962403	0.00567699	0.00765286	0.0384715	0.0407828	0.00728579	0.00836341	0.243777	0.244089		422.2	-0.00512	0	-0.01114	0	-0.00623	0	-0.01202	0	-0.01187	0	-0.00876	0	-0.00486	0
422.4	0.0370436	0.0309706	0.0868776	0.0769483	0.467202	0.473913	1.20114	1.20769	0.938158	0.938256	0.0431264	0.0372697	0.168912	0.166751		422.4	0.511146	0.50708	0.0903475	0.0916004	0.00949346	0.00962423	0.00582627	0.00765305	0.0381804	0.0407833	0.00714588	0.00836361	0.243271	0.244089		422.4	-0.00535	0	-0.0114	0	-0.00661	0	-0.01207	0	-0.01215	0	-0.00895	0	-0.00489	0
422.6	0.0369208	0.0310038	0.0863476	0.0770285	0.467733	0.474291	1.20087	1.20773	0.938442	0.938636	0.0431764	0.0373094	0.169177	0.166914		422.6	0.511041	0.50708	0.090618	0.0916007	0.00978483	0.00962443	0.0060603	0.00765324	0.0379977	0.0407839	0.00732583	0.00836381	0.243638	0.244089		422.6	-0.00518	0	-0.01161	0	-0.00637	0	-0.01222	0	-0.01215	0	-0.00869	0	-0.0048	0
422.8	0.0372808	0.031037	0.0864496	0.0771087	0.468533	0.474669	1.20077	1.20777	0.939206	0.939015	0.0432622	0.037349	0.169633	0.167077		422.8	0.511296	0.50708	0.0909375	0.0916011	0.0103016	0.00962462	0.00576576	0.00765343	0.0380046	0.0407844	0.00755147	0.00836401	0.243233	0.244089		422.8	-0.00592	0	-0.01183	0	-0.00679	0	-0.01231	0	-0.01222	0	-0.00875	0	-0.00496	0
423	0.0369852	0.0310702	0.0861628	0.0771888	0.468765	0.475046	1.20099	1.20781	0.939457	0.939393	0.0429178	0.0373887	0.170022	0.16724		423	0.511306	0.50708	0.0911052	0.0916014	0.0101689	0.00962482	0.00578301	0.00765362	0.0381162	0.040785	0.00765273	0.0083642	0.243142	0.244089		423	-0.00602	0	-0.01162	0	-0.00672	0	-0.01239	0	-0.01216	0	-0.00884	0	-0.005	0
423.2	0.036678	0.0311034	0.086457	0.077269	0.468836	0.475423	1.20146	1.20785	0.939855	0.939771	0.0429485	0.0374284	0.170036	0.167402		423.2	0.51181	0.50708	0.0912834	0.0916017	0.0101128	0.00962501	0.00546824	0.0076538	0.0385078	0.0407855	0.00812655	0.0083644	0.243327	0.244089		423.2	-0.00595	0	-0.01138	0	-0.00684	0	-0.01222	0	-0.01217	0	-0.00868	0	-0.00504	0
423.4	0.0364933	0.0311366	0.0859936	0.0773492	0.468972	0.4758	1.20122	1.20789	0.939681	0.940148	0.0425915	0.0374681	0.169881	0.167565		423.4	0.512128	0.50708	0.0914643	0.0916021	0.00986103	0.00962521	0.00535764	0.00765399	0.0389593	0.040786	0.00855748	0.00836459	0.243282	0.244089		423.4	-0.00561	0	-0.01128	0	-0.0067	0	-0.01161	0	-0.01225	0	-0.00821	0	-0.00457	0
423.6	0.0362484	0.0311698	0.0860129	0.0774293	0.469326	0.476177	1.20149	1.20793	0.940003	0.940524	0.042584	0.0375077	0.170157	0.167728		423.6	0.512322	0.50708	0.0917671	0.0916024	0.00971606	0.0096254	0.00578914	0.00765417	0.0397444	0.0407866	0.00856256	0.00836478	0.243389	0.244089		423.6	-0.00461	0	-0.01129	0	-0.00627	0	-0.01064	0	-0.01219	0	-0.00814	0	-0.00361	0
423.8	0.0353502	0.031203	0.0856957	0.0775094	0.468752	0.476553	1.20085	1.20797	0.939505	0.940899	0.0418831	0.0375474	0.169947	0.16789		423.8	0.51201	0.50708	0.0911939	0.0916027	0.00961667	0.00962559	0.00599981	0.00765436	0.039529	0.0407871	0.00793369	0.00836497	0.243232	0.244089		423.8	-0.00449	0	-0.01127	0	-0.00644	0	-0.01049	0	-0.01274	0	-0.00893	0	-0.00378	0
424	0.035519	0.0312362	0.0860111	0.0775896	0.469007	0.476929	1.20102	1.208	0.939651	0.941274	0.0419619	0.037587	0.170049	0.168053		424	0.511534	0.50708	0.0908983	0.091603	0.00971566	0.00962578	0.00626725	0.00765454	0.0390672	0.0407876	0.00774377	0.00836516	0.243161	0.244089		424	-0.00411	0	-0.01141	0	-0.0061	0	-0.01042	0	-0.01247	0	-0.00889	0	-0.00356	0
424.2	0.0350559	0.0312694	0.0857836	0.0776697	0.469348	0.477305	1.20115	1.20804	0.94	0.941648	0.041761	0.0376267	0.169476	0.168215		424.2	0.511736	0.50708	0.0904657	0.0916033	0.00949323	0.00962597	0.00635495	0.00765472	0.0391394	0.0407882	0.00743779	0.00836535	0.242712	0.244089		424.2	-0.00428	0	-0.01148	0	-0.00597	0	-0.0101	0	-0.01259	0	-0.00876	0	-0.0036	0
424.4	0.0352539	0.0313026	0.0860525	0.0777498	0.469427	0.47768	1.201	1.20808	0.940326	0.942021	0.0416522	0.0376664	0.169291	0.168378		424.4	0.512229	0.50708	0.0901403	0.0916036	0.00987879	0.00962616	0.00711856	0.0076549	0.0393744	0.0407887	0.00735747	0.00836554	0.243025	0.244089		424.4	-0.00383	0	-0.01055	0	-0.00533	0	-0.00945	0	-0.01212	0	-0.00811	0	-0.00335	0
424.6	0.0355863	0.0313358	0.0863854	0.0778299	0.469937	0.478056	1.2013	1.20812	0.940789	0.942394	0.0417325	0.037706	0.168814	0.16854		424.6	0.512723	0.50708	0.0895849	0.091604	0.00976919	0.00962634	0.00756317	0.00765508	0.0395169	0.0407892	0.00776261	0.00836573	0.243599	0.244089		424.6	-0.00387	0	-0.011	0	-0.00496	0	-0.00955	0	-0.01226	0	-0.00773	0	-0.00317	0
424.8	0.0360758	0.031369	0.0870207	0.07791	0.470923	0.478431	1.2017	1.20815	0.941257	0.942766	0.042583	0.0377457	0.169039	0.168703		424.8	0.512859	0.50708	0.0899271	0.0916043	0.00972347	0.00962653	0.00782313	0.00765526	0.0399074	0.0407897	0.00772167	0.00836591	0.2439	0.244089		424.8	-0.00329	0	-0.01008	0	-0.0043	0	-0.00882	0	-0.01179	0	-0.00708	0	-0.00228	0
425	0.0366734	0.0314021	0.0877573	0.0779901	0.471601	0.478806	1.20211	1.20819	0.942155	0.943137	0.0429791	0.0377853	0.16929	0.168865		425	0.51284	0.50708	0.0892882	0.0916046	0.00955605	0.00962671	0.00816804	0.00765544	0.0401837	0.0407902	0.00772273	0.0083661	0.244221	0.244089		425	-0.00284	0	-0.00955	0	-0.00411	0	-0.00879	0	-0.01144	0	-0.00665	0	-0.00183	0
425.2	0.0370716	0.0314353	0.0879908	0.0780702	0.472113	0.47918	1.20243	1.20823	0.942685	0.943507	0.043405	0.037825	0.169585	0.169027		425.2	0.512828	0.50708	0.0896051	0.0916049	0.00997597	0.0096269	0.00839756	0.00765561	0.0409992	0.0407907	0.00811064	0.00836628	0.244794	0.244089		425.2	-0.00281	0	-0.00916	0	-0.00414	0	-0.00841	0	-0.01113	0	-0.00635	0	-0.00193	0
425.4	0.0364993	0.0314685	0.0875919	0.0781502	0.472008	0.479555	1.20254	1.20826	0.943118	0.943877	0.0430284	0.0378646	0.16912	0.16919		425.4	0.512897	0.50708	0.0892138	0.0916052	0.00985023	0.00962708	0.00841061	0.00765579	0.0411017	0.0407912	0.00809269	0.00836646	0.244759	0.244089		425.4	-0.00282	0	-0.0088	0	-0.00396	0	-0.00798	0	-0.01086	0	-0.00639	0	-0.0021	0
425.6	0.0362983	0.0315017	0.0877896	0.0782303	0.47233	0.479929	1.20305	1.2083	0.942873	0.944246	0.0424027	0.0379043	0.168919	0.169352		425.6	0.512793	0.50708	0.0890301	0.0916055	0.0096845	0.00962726	0.0079193	0.00765596	0.041117	0.0407917	0.00774682	0.00836664	0.244429	0.244089		425.6	-0.00287	0	-0.00864	0	-0.00437	0	-0.0079	0	-0.01015	0	-0.00603	0	-0.00242	0
425.8	0.036546	0.0315349	0.0883049	0.0783104	0.473075	0.480302	1.20377	1.20833	0.943274	0.944614	0.042829	0.0379439	0.168741	0.169514		425.8	0.512958	0.50708	0.0892044	0.0916058	0.0099609	0.00962744	0.00781933	0.00765613	0.0412814	0.0407922	0.00795466	0.00836682	0.244604	0.244089		425.8	-0.00282	0	-0.00874	0	-0.00434	0	-0.00803	0	-0.00992	0	-0.00613	0	-0.00247	0
426	0.035992	0.0315681	0.0879555	0.0783904	0.473643	0.480676	1.20398	1.20837	0.94356	0.944982	0.0428562	0.0379835	0.168883	0.169676		426	0.512856	0.50708	0.0896045	0.0916061	0.0102921	0.00962762	0.00750886	0.0076563	0.0412485	0.0407927	0.00781544	0.008367	0.244538	0.244089		426	-0.00327	0	-0.00863	0	-0.00408	0	-0.00797	0	-0.00995	0	-0.00636	0	-0.00233	0
426.2	0.0357859	0.0316012	0.0884427	0.0784704	0.474742	0.481049	1.20399	1.20841	0.94417	0.945349	0.0433448	0.0380232	0.169527	0.169838		426.2	0.512975	0.50708	0.0902783	0.0916064	0.0106631	0.0096278	0.00728527	0.00765648	0.0414355	0.0407932	0.00839534	0.00836718	0.244628	0.244089		426.2	-0.00372	0	-0.009	0	-0.00423	0	-0.00794	0	-0.00994	0	-0.00651	0	-0.00212	0
426.4	0.0356286	0.0316344	0.0879812	0.0785504	0.475181	0.481422	1.20319	1.20844	0.943552	0.945715	0.0432148	0.0380628	0.169534	0.170001		426.4	0.512798	0.50708	0.0902248	0.0916066	0.0107651	0.00962797	0.00715284	0.00765664	0.040943	0.0407937	0.00850147	0.00836736	0.244563	0.244089		426.4	-0.00404	0	-0.00916	0	-0.0046	0	-0.00823	0	-0.01009	0	-0.00645	0	-0.00277	0
426.6	0.0357904	0.0316676	0.0881	0.0786305	0.475968	0.481795	1.20355	1.20848	0.944458	0.94608	0.043567	0.0381024	0.170194	0.170163		426.6	0.51332	0.50708	0.0908569	0.0916069	0.011336	0.00962815	0.00691925	0.00765681	0.0413406	0.0407942	0.00950758	0.00836753	0.245309	0.244089		426.6	-0.00423	0	-0.00964	0	-0.00468	0	-0.00866	0	-0.01005	0	-0.00666	0	-0.00315	0
426.8	0.0358289	0.0317008	0.0885814	0.0787105	0.476551	0.482168	1.20357	1.20851	0.944874	0.946445	0.0434976	0.038142	0.170789	0.170325		426.8	0.513071	0.50708	0.0905508	0.0916072	0.0111264	0.00962832	0.00600697	0.00765698	0.040869	0.0407946	0.00927846	0.00836771	0.244401	0.244089		426.8	-0.00497	0	-0.01015	0	-0.00502	0	-0.00913	0	-0.01086	0	-0.00681	0	-0.004	0
427	0.0361662	0.0317339	0.0888879	0.0787905	0.476979	0.48254	1.20416	1.20855	0.945177	0.946809	0.0439041	0.0381817	0.171874	0.170487		427	0.513224	0.50708	0.0910618	0.0916075	0.0110635	0.00962849	0.00582845	0.00765715	0.0409583	0.0407951	0.00937026	0.00836788	0.244547	0.244089		427	-0.00512	0	-0.01068	0	-0.00513	0	-0.00958	0	-0.0115	0	-0.00715	0	-0.00435	0
427.2	0.0362504	0.0317671	0.0891363	0.0788705	0.477395	0.482912	1.20456	1.20858	0.94605	0.947173	0.0444861	0.0382213	0.172327	0.170648		427.2	0.512853	0.50708	0.0910563	0.0916078	0.0104949	0.00962867	0.00477354	0.00765731	0.0407355	0.0407956	0.00895566	0.00836805	0.244011	0.244089		427.2	-0.00526	0	-0.01107	0	-0.00534	0	-0.00996	0	-0.01237	0	-0.0074	0	-0.005	0
427.4	0.036961	0.0318003	0.0888036	0.0789504	0.477717	0.483284	1.20463	1.20862	0.946698	0.947535	0.0444601	0.0382609	0.172874	0.17081		427.4	0.512687	0.50708	0.0913161	0.091608	0.0104503	0.00962884	0.00521411	0.00765748	0.0407378	0.0407961	0.00851251	0.00836823	0.24426	0.244089		427.4	-0.00481	0	-0.01115	0	-0.00528	0	-0.00975	0	-0.01231	0	-0.00732	0	-0.00484	0
427.6	0.0368382	0.0318335	0.089079	0.0790304	0.478291	0.483656	1.20499	1.20865	0.947225	0.947897	0.0448832	0.0383005	0.173927	0.170972		427.6	0.511971	0.50708	0.0908808	0.0916083	0.010467	0.00962901	0.004672	0.00765764	0.0404464	0.0407965	0.00768415	0.0083684	0.243961	0.244089		427.6	-0.00433	0	-0.01152	0	-0.00555	0	-0.0099	0	-0.01279	0	-0.00763	0	-0.00507	0
427.8	0.0371058	0.0318666	0.0891443	0.0791104	0.4784	0.484027	1.20459	1.20868	0.947372	0.948259	0.0446881	0.0383401	0.17416	0.171134		427.8	0.511536	0.50708	0.0904718	0.0916086	0.00993308	0.00962918	0.00427559	0.0076578	0.0393738	0.040797	0.00709319	0.00836857	0.243432	0.244089		427.8	-0.00418	0	-0.01226	0	-0.00621	0	-0.01055	0	-0.01317	0	-0.00742	0	-0.0054	0
428	0.0377475	0.0318998	0.0895015	0.0791903	0.479284	0.484398	1.20549	1.20872	0.948155	0.948619	0.0449923	0.0383797	0.174684	0.171296		428	0.511465	0.50708	0.0905652	0.0916089	0.00962748	0.00962934	0.00441181	0.00765797	0.0391023	0.0407974	0.00737259	0.00836873	0.243107	0.244089		428	-0.00435	0	-0.01308	0	-0.00623	0	-0.01041	0	-0.01352	0	-0.00721	0	-0.00574	0
428.2	0.037924	0.031933	0.0896986	0.0792703	0.479698	0.484769	1.20574	1.20875	0.948499	0.948979	0.0444659	0.0384194	0.174901	0.171457		428.2	0.511831	0.50708	0.0904817	0.0916091	0.00951846	0.00962951	0.00445031	0.00765813	0.0391181	0.0407979	0.0073087	0.0083689	0.243388	0.244089		428.2	-0.00449	0	-0.01318	0	-0.00616	0	-0.01063	0	-0.01361	0	-0.00681	0	-0.00631	0
428.4	0.0382727	0.0319661	0.0900652	0.0793502	0.480303	0.48514	1.20534	1.20879	0.948791	0.949338	0.0444276	0.038459	0.175212	0.171619		428.4	0.512088	0.50708	0.0906005	0.0916094	0.00998493	0.00962968	0.00520027	0.00765829	0.0394788	0.0407983	0.00714718	0.00836907	0.243991	0.244089		428.4	-0.00376	0	-0.0122	0	-0.00542	0	-0.01039	0	-0.01287	0	-0.00619	0	-0.00597	0
428.6	0.037937	0.0319993	0.0896036	0.0794301	0.480415	0.48551	1.20558	1.20882	0.948958	0.949697	0.0443446	0.0384986	0.174911	0.171781		428.6	0.5122	0.50708	0.0902373	0.0916096	0.009631	0.00962984	0.00560352	0.00765844	0.0396401	0.0407988	0.00763596	0.00836923	0.243654	0.244089		428.6	-0.00264	0	-0.01173	0	-0.00457	0	-0.01052	0	-0.01228	0	-0.00529	0	-0.00565	0
428.8	0.0382837	0.0320324	0.0896936	0.0795101	0.480886	0.48588	1.20535	1.20885	0.948894	0.950055	0.0445319	0.0385382	0.175452	0.171942		428.8	0.512422	0.50708	0.0905284	0.0916099	0.00947092	0.00963	0.00632973	0.0076586	0.0399861	0.0407992	0.00783979	0.0083694	0.243737	0.244089		428.8	-0.00258	0	-0.01143	0	-0.00442	0	-0.00992	0	-0.01184	0	-0.00515	0	-0.00526	0
429	0.0380625	0.0320656	0.0894106	0.07959	0.480417	0.48625	1.20447	1.20888	0.948754	0.950412	0.0437134	0.0385778	0.174594	0.172104		429	0.512184	0.50708	0.0898622	0.0916102	0.00909182	0.00963017	0.0060417	0.00765876	0.0401024	0.0407997	0.00734262	0.00836956	0.243727	0.244089		429	-0.00299	0	-0.01158	0	-0.0046	0	-0.01033	0	-0.01215	0	-0.00501	0	-0.00587	0
429.2	0.0381507	0.0320987	0.0894157	0.0796699	0.480906	0.48662	1.20451	1.20892	0.949103	0.950769	0.0436826	0.0386174	0.174176	0.172265		429.2	0.512272	0.50708	0.090192	0.0916104	0.00916603	0.00963033	0.00645951	0.00765891	0.0405457	0.0408001	0.0077517	0.00836972	0.244259	0.244089		429.2	-0.00316	0	-0.01083	0	-0.00421	0	-0.00952	0	-0.01192	0	-0.00474	0	-0.00574	0
429.4	0.0375545	0.0321319	0.0894101	0.0797498	0.4803	0.486989	1.20404	1.20895	0.949181	0.951124	0.0427828	0.038657	0.173277	0.172427		429.4	0.512447	0.50708	0.0901959	0.0916107	0.0092283	0.00963049	0.00695012	0.00765907	0.0403916	0.0408006	0.00778881	0.00836988	0.243952	0.244089		429.4	-0.003	0	-0.01046	0	-0.00405	0	-0.00954	0	-0.01147	0	-0.00488	0	-0.00529	0
429.6	0.0377566	0.032165	0.0898415	0.0798296	0.480506	0.487358	1.20442	1.20898	0.94959	0.95148	0.0426886	0.0386966	0.173552	0.172588		429.6	0.512101	0.50708	0.0901087	0.0916109	0.00958655	0.00963065	0.00629617	0.00765922	0.0403179	0.040801	0.0074511	0.00837004	0.24338	0.244089		429.6	-0.00265	0	-0.01002	0	-0.00392	0	-0.00967	0	-0.01063	0	-0.00458	0	-0.00479	0
429.8	0.0377822	0.0321982	0.090026	0.0799095	0.480845	0.487727	1.20455	1.20901	0.950112	0.951834	0.0430562	0.0387361	0.173625	0.17275		429.8	0.51218	0.50708	0.0901867	0.0916112	0.00987912	0.00963081	0.00601315	0.00765938	0.0399635	0.0408014	0.0073249	0.0083702	0.243166	0.244089		429.8	-0.0033	0	-0.01034	0	-0.00433	0	-0.01003	0	-0.01128	0	-0.00544	0	-0.00493	0
430	0.0377489	0.0322313	0.0901298	0.0799894	0.481126	0.488096	1.20419	1.20905	0.951006	0.952188	0.0430391	0.0387757	0.174042	0.172911		430	0.511983	0.50708	0.090476	0.0916114	0.00991748	0.00963096	0.00654847	0.00765953	0.0402039	0.0408019	0.00741873	0.00837036	0.243596	0.244089		430	-0.00407	0	-0.01062	0	-0.00476	0	-0.01006	0	-0.0113	0	-0.00563	0	-0.0051	0
430.2	0.0376115	0.0322645	0.0904966	0.0800692	0.481282	0.488464	1.20341	1.20908	0.951498	0.952541	0.0427945	0.0388153	0.174052	0.173072		430.2	0.512126	0.50708	0.0905249	0.0916117	0.00978619	0.00963112	0.0061252	0.00765968	0.0402487	0.0408023	0.00748791	0.00837052	0.24348	0.244089		430.2	-0.00475	0	-0.01134	0	-0.00521	0	-0.01074	0	-0.01188	0	-0.00611	0	-0.00583	0
430.4	0.0379174	0.0322976	0.0907419	0.0801491	0.48148	0.488832	1.20329	1.20911	0.951609	0.952893	0.0425315	0.0388549	0.174069	0.173234		430.4	0.512043	0.50708	0.0907628	0.0916119	0.00949458	0.00963128	0.00638856	0.00765983	0.039843	0.0408027	0.00755912	0.00837068	0.243377	0.244089		430.4	-0.00451	0	-0.01151	0	-0.00543	0	-0.01087	0	-0.01202	0	-0.0065	0	-0.00615	0
430.6	0.0378934	0.0323308	0.0913306	0.0802289	0.481905	0.4892	1.20357	1.20914	0.952291	0.953245	0.0427093	0.0388945	0.174377	0.173395		430.6	0.512162	0.50708	0.091397	0.0916121	0.00947987	0.00963143	0.00626498	0.00765998	0.0402729	0.0408031	0.00773623	0.00837083	0.243155	0.244089		430.6	-0.00523	0	-0.01237	0	-0.00598	0	-0.01147	0	-0.01298	0	-0.00736	0	-0.00623	0
430.8	0.037989	0.0323639	0.0917409	0.0803088	0.482709	0.489568	1.20368	1.20917	0.952292	0.953596	0.0430916	0.038934	0.17468	0.173556		430.8	0.511767	0.50708	0.0911072	0.0916124	0.00941653	0.00963158	0.00636987	0.00766013	0.0401266	0.0408035	0.00715739	0.00837099	0.242497	0.244089		430.8	-0.00559	0	-0.01271	0	-0.00617	0	-0.01178	0	-0.01403	0	-0.00802	0	-0.00637	0
431	0.0382108	0.0323971	0.0919642	0.0803886	0.483382	0.489935	1.20453	1.2092	0.95297	0.953947	0.0436262	0.0389736	0.175019	0.173717		431	0.51128	0.50708	0.091201	0.0916126	0.0090321	0.00963174	0.00604808	0.00766028	0.0400822	0.0408039	0.00673769	0.00837114	0.242506	0.244089		431	-0.00583	0	-0.01333	0	-0.00659	0	-0.01152	0	-0.01413	0	-0.00836	0	-0.00603	0
431.2	0.038266	0.0324302	0.0917102	0.0804684	0.483713	0.490303	1.20491	1.20923	0.953206	0.954297	0.0440116	0.0390132	0.174893	0.173878		431.2	0.510653	0.50708	0.0912713	0.0916128	0.00867613	0.00963189	0.00583788	0.00766042	0.0398018	0.0408044	0.00578621	0.00837129	0.24234	0.244089		431.2	-0.00544	0	-0.01308	0	-0.00644	0	-0.01164	0	-0.01432	0	-0.00827	0	-0.00598	0
431.4	0.0384358	0.0324633	0.0919698	0.0805482	0.484154	0.490669	1.20543	1.20927	0.953544	0.954646	0.0442393	0.0390527	0.175336	0.174039		431.4	0.510401	0.50708	0.0910647	0.0916131	0.00827461	0.00963204	0.00607991	0.00766057	0.0393136	0.0408048	0.0056367	0.00837145	0.242443	0.244089		431.4	-0.00542	0	-0.01295	0	-0.00675	0	-0.01176	0	-0.01446	0	-0.00819	0	-0.00565	0
431.6	0.0381462	0.0324965	0.0920966	0.080628	0.485096	0.491036	1.20536	1.2093	0.953207	0.954994	0.0446108	0.0390923	0.17539	0.1742		431.6	0.509913	0.50708	0.0908318	0.0916133	0.00799422	0.00963219	0.00549901	0.00766071	0.03859	0.0408052	0.00552424	0.0083716	0.242498	0.244089		431.6	-0.0052	0	-0.01341	0	-0.0073	0	-0.01181	0	-0.0148	0	-0.00852	0	-0.00561	0
431.8	0.0381206	0.0325296	0.0919544	0.0807078	0.485133	0.491403	1.20534	1.20933	0.953167	0.955342	0.0443409	0.0391319	0.1748	0.174361		431.8	0.510363	0.50708	0.091271	0.0916135	0.00806489	0.00963234	0.00609464	0.00766086	0.0383976	0.0408056	0.00594459	0.00837175	0.24304	0.244089		431.8	-0.00529	0	-0.01373	0	-0.0071	0	-0.01166	0	-0.01456	0	-0.00825	0	-0.00518	0
432	0.03803	0.0325627	0.0918129	0.0807876	0.485573	0.491769	1.20575	1.20936	0.953199	0.955689	0.0450653	0.0391714	0.174887	0.174522		432	0.510693	0.50708	0.091355	0.0916138	0.00894034	0.00963249	0.00653413	0.007661	0.0388694	0.040806	0.00650283	0.0083719	0.243316	0.244089		432	-0.00596	0	-0.01423	0	-0.00718	0	-0.01164	0	-0.01492	0	-0.00891	0	-0.0056	0
432.2	0.0385232	0.0325959	0.0919198	0.0808673	0.486119	0.492135	1.20606	1.20939	0.954069	0.956035	0.0452944	0.039211	0.175149	0.174683		432.2	0.510463	0.50708	0.0912545	0.091614	0.00904804	0.00963263	0.00645324	0.00766114	0.0389058	0.0408064	0.00644499	0.00837204	0.243287	0.244089		432.2	-0.00511	0	-0.01361	0	-0.00646	0	-0.01136	0	-0.01429	0	-0.00858	0	-0.00495	0
432.4	0.0387466	0.032629	0.0918393	0.0809471	0.487163	0.492501	1.20632	1.20942	0.954692	0.956381	0.0457637	0.0392506	0.175536	0.174844		432.4	0.510734	0.50708	0.0913525	0.0916142	0.0092341	0.00963278	0.00671144	0.00766129	0.0399889	0.0408068	0.00660078	0.00837219	0.243718	0.244089		432.4	-0.00403	0	-0.01317	0	-0.00595	0	-0.01049	0	-0.01339	0	-0.00807	0	-0.00407	0
432.6	0.0385972	0.0326621	0.0915397	0.0810268	0.487136	0.492866	1.20639	1.20945	0.955257	0.956726	0.0456351	0.0392901	0.175572	0.175005		432.6	0.511127	0.50708	0.0916801	0.0916144	0.00922894	0.00963292	0.00694282	0.00766143	0.0404923	0.0408072	0.00759542	0.00837234	0.243704	0.244089		432.6	-0.00301	0	-0.01299	0	-0.00547	0	-0.01042	0	-0.0128	0	-0.00721	0	-0.00352	0
432.8	0.0385798	0.0326952	0.0916161	0.0811066	0.487453	0.493231	1.20613	1.20948	0.9555	0.957071	0.045719	0.0393297	0.176106	0.175166		432.8	0.511397	0.50708	0.0912833	0.0916147	0.00920136	0.00963307	0.00685417	0.00766157	0.0406056	0.0408076	0.00767796	0.00837248	0.243925	0.244089		432.8	-0.00341	0	-0.01308	0	-0.00539	0	-0.00997	0	-0.01254	0	-0.00711	0	-0.00338	0
433	0.0394902	0.0327284	0.0918743	0.0811863	0.487652	0.493596	1.20641	1.2095	0.956264	0.957415	0.0456335	0.0393692	0.176275	0.175326		433	0.512233	0.50708	0.0915444	0.0916149	0.00976916	0.00963321	0.0069294	0.00766171	0.0410321	0.040808	0.0078803	0.00837263	0.244107	0.244089		433	-0.00324	0	-0.01206	0	-0.00478	0	-0.01015	0	-0.01219	0	-0.00704	0	-0.00316	0
433.2	0.0396422	0.0327615	0.0921116	0.081266	0.488111	0.493961	1.2065	1.20953	0.957172	0.957758	0.0457132	0.0394087	0.176695	0.175487		433.2	0.512736	0.50708	0.0918392	0.0916151	0.0103527	0.00963336	0.00763562	0.00766184	0.0414498	0.0408083	0.00867431	0.00837277	0.244757	0.244089		433.2	-0.00274	0	-0.0111	0	-0.00378	0	-0.00926	0	-0.01131	0	-0.00669	0	-0.00238	0
433.4	0.0392515	0.0327946	0.0921326	0.0813458	0.487469	0.494326	1.20618	1.20956	0.957475	0.9581	0.0452153	0.0394483	0.176507	0.175648		433.4	0.513112	0.50708	0.0920028	0.0916153	0.0111613	0.0096335	0.00782562	0.00766198	0.0414157	0.0408087	0.00891044	0.00837291	0.244841	0.244089		433.4	-0.00248	0	-0.01061	0	-0.00316	0	-0.0092	0	-0.01066	0	-0.00636	0	-0.00181	0
433.6	0.0397973	0.0328277	0.0921792	0.0814255	0.487764	0.49469	1.20641	1.20959	0.95867	0.958442	0.0454558	0.0394878	0.177591	0.175809		433.6	0.513652	0.50708	0.0921143	0.0916155	0.0112386	0.00963364	0.00716785	0.00766212	0.0413653	0.0408091	0.00889202	0.00837306	0.2445	0.244089		433.6	-0.00256	0	-0.01023	0	-0.00291	0	-0.00999	0	-0.01062	0	-0.00605	0	-0.00215	0
433.8	0.0395951	0.0328608	0.0918706	0.0815052	0.487682	0.495054	1.20634	1.20962	0.959023	0.958783	0.0450987	0.0395274	0.177642	0.175969		433.8	0.513579	0.50708	0.0921573	0.0916157	0.0108847	0.00963378	0.007063	0.00766225	0.041285	0.0408095	0.00875946	0.0083732	0.244257	0.244089		433.8	-0.00292	0	-0.0106	0	-0.00318	0	-0.01048	0	-0.01083	0	-0.00613	0	-0.00291	0
434	0.0393601	0.032894	0.0915414	0.0815849	0.487409	0.495418	1.20576	1.20965	0.958999	0.959124	0.0439543	0.0395669	0.17761	0.17613		434	0.513704	0.50708	0.0919374	0.0916159	0.0108016	0.00963392	0.00719617	0.00766239	0.0410823	0.0408098	0.00857736	0.00837334	0.244228	0.244089		434	-0.00302	0	-0.01091	0	-0.00298	0	-0.01091	0	-0.01148	0	-0.00581	0	-0.00377	0
434.2	0.0388073	0.0329271	0.0911581	0.0816645	0.487021	0.495781	1.20502	1.20968	0.958963	0.959464	0.0434213	0.0396064	0.177437	0.17629		434.2	0.514014	0.50708	0.0919166	0.0916161	0.0109886	0.00963405	0.0072145	0.00766252	0.0409622	0.0408102	0.00855957	0.00837348	0.244264	0.244089		434.2	-0.00326	0	-0.01132	0	-0.00284	0	-0.01147	0	-0.01164	0	-0.00609	0	-0.00382	0
434.4	0.0385303	0.0329602	0.091302	0.0817442	0.487408	0.496144	1.20506	1.20971	0.959175	0.959803	0.0430614	0.039646	0.177488	0.176451		434.4	0.513727	0.50708	0.0923055	0.0916163	0.0107932	0.00963419	0.00757321	0.00766266	0.0410525	0.0408106	0.00891565	0.00837362	0.244378	0.244089		434.4	-0.00311	0	-0.01094	0	-0.0025	0	-0.01075	0	-0.01134	0	-0.00561	0	-0.00351	0
434.6	0.0379988	0.0329933	0.091214	0.0818239	0.487756	0.496507	1.20485	1.20973	0.959408	0.960141	0.0430895	0.0396855	0.177835	0.176611		434.6	0.513535	0.50708	0.0922097	0.0916165	0.0107643	0.00963433	0.00694056	0.00766279	0.040691	0.0408109	0.00838635	0.00837375	0.244266	0.244089		434.6	-0.00386	0	-0.01122	0	-0.00257	0	-0.01128	0	-0.01156	0	-0.00616	0	-0.004	0
434.8	0.0376099	0.0330264	0.090938	0.0819035	0.488354	0.49687	1.20518	1.20976	0.959619	0.960479	0.0430379	0.039725	0.178063	0.176771		434.8	0.512861	0.50708	0.0915793	0.0916167	0.0102851	0.00963446	0.00690751	0.00766292	0.0398693	0.0408113	0.00767688	0.00837389	0.243934	0.244089		434.8	-0.0034	0	-0.01055	0	-0.00184	0	-0.01071	0	-0.01167	0	-0.00591	0	-0.00358	0
435	0.0373638	0.0330595	0.0905568	0.0819832	0.488597	0.497233	1.20547	1.20979	0.959641	0.960817	0.0427985	0.0397645	0.178007	0.176932		435	0.512211	0.50708	0.0912024	0.0916169	0.00978316	0.0096346	0.00625673	0.00766305	0.0391682	0.0408117	0.00671943	0.00837403	0.243765	0.244089		435	-0.003	0	-0.00992	0	-0.00167	0	-0.01015	0	-0.01126	0	-0.00536	0	-0.00321	0
435.2	0.0374727	0.0330926	0.0905265	0.0820628	0.489158	0.497595	1.20562	1.20982	0.959558	0.961153	0.043197	0.0398041	0.178559	0.177092		435.2	0.512271	0.50708	0.0915644	0.0916171	0.00985853	0.00963473	0.00667446	0.00766318	0.038888	0.040812	0.00597061	0.00837416	0.243893	0.244089		435.2	-0.00335	0	-0.00989	0	-0.00184	0	-0.01094	0	-0.01196	0	-0.00567	0	-0.00383	0
435.4	0.0373475	0.0331257	0.0906758	0.0821424	0.489437	0.497957	1.20545	1.20984	0.959567	0.961489	0.0433718	0.0398436	0.178593	0.177252		435.4	0.512009	0.50708	0.0912269	0.0916173	0.00916818	0.00963487	0.00606099	0.00766331	0.0380483	0.0408124	0.00575491	0.0083743	0.24344	0.244089		435.4	-0.0041	0	-0.01018	0	-0.00244	0	-0.01106	0	-0.01232	0	-0.00629	0	-0.00387	0
435.6	0.0374261	0.0331588	0.0906889	0.0822221	0.489738	0.498319	1.20523	1.20987	0.959115	0.961825	0.0432222	0.0398831	0.178589	0.177413		435.6	0.511705	0.50708	0.0910581	0.0916175	0.0089539	0.009635	0.00581442	0.00766344	0.0373964	0.0408127	0.00584871	0.00837443	0.243327	0.244089		435.6	-0.00471	0	-0.01102	0	-0.00312	0	-0.01097	0	-0.01279	0	-0.00709	0	-0.00431	0
435.8	0.0374061	0.0331919	0.0910449	0.0823017	0.490231	0.498681	1.20553	1.2099	0.959986	0.962159	0.0437477	0.0399226	0.178935	0.177573		435.8	0.511514	0.50708	0.0900397	0.0916177	0.00864719	0.00963513	0.00575277	0.00766357	0.0369992	0.0408131	0.00529629	0.00837456	0.243114	0.244089		435.8	-0.00524	0	-0.01117	0	-0.00348	0	-0.011	0	-0.0134	0	-0.00723	0	-0.00431	0
436	0.0373652	0.033225	0.0909274	0.0823813	0.490877	0.499042	1.20549	1.20993	0.960329	0.962493	0.0442509	0.0399621	0.178903	0.177733		436	0.511533	0.50708	0.0903189	0.0916179	0.00893246	0.00963526	0.0058665	0.00766369	0.0376795	0.0408134	0.00539935	0.00837469	0.243126	0.244089		436	-0.00557	0	-0.01152	0	-0.00434	0	-0.0112	0	-0.01414	0	-0.00818	0	-0.00439	0
436.2	0.0376025	0.0332581	0.0912176	0.0824609	0.491362	0.499403	1.20621	1.20995	0.961094	0.962827	0.0440784	0.0400016	0.178878	0.177893		436.2	0.511264	0.50708	0.089925	0.0916181	0.00830626	0.00963539	0.00513501	0.00766382	0.0374654	0.0408138	0.00468557	0.00837483	0.242566	0.244089		436.2	-0.00496	0	-0.01148	0	-0.00421	0	-0.01051	0	-0.01403	0	-0.00815	0	-0.00396	0
436.4	0.0374007	0.0332912	0.0914574	0.0825405	0.492342	0.499764	1.2062	1.20998	0.961528	0.96316	0.0444386	0.0400411	0.179367	0.178053		436.4	0.511261	0.50708	0.0892689	0.0916183	0.00802442	0.00963552	0.00496149	0.00766395	0.0378071	0.0408141	0.00454364	0.00837496	0.242393	0.244089		436.4	-0.00472	0	-0.01186	0	-0.00543	0	-0.01076	0	-0.01444	0	-0.00805	0	-0.00424	0
436.6	0.0372097	0.0333243	0.09152	0.08262	0.492366	0.500125	1.20632	1.21001	0.961923	0.963492	0.0445157	0.0400806	0.179245	0.178213		436.6	0.511464	0.50708	0.0895082	0.0916185	0.00765339	0.00963565	0.00512851	0.00766407	0.0374905	0.0408145	0.00476811	0.00837509	0.242233	0.244089		436.6	-0.00432	0	-0.0113	0	-0.00578	0	-0.01051	0	-0.0144	0	-0.00811	0	-0.00425	0
436.8	0.0371272	0.0333574	0.0916067	0.0826996	0.492818	0.500485	1.20652	1.21003	0.962473	0.963823	0.0448016	0.0401201	0.179249	0.178373		436.8	0.511797	0.50708	0.089179	0.0916187	0.00757059	0.00963577	0.00554141	0.00766419	0.037551	0.0408148	0.00434233	0.00837521	0.241842	0.244089		436.8	-0.00488	0	-0.0116	0	-0.00648	0	-0.0105	0	-0.015	0	-0.0089	0	-0.00506	0
437	0.0376519	0.0333905	0.0918111	0.0827791	0.492991	0.500845	1.20633	1.21006	0.962924	0.964154	0.0449312	0.0401596	0.17919	0.178533		437	0.512615	0.50708	0.0892507	0.0916188	0.00766649	0.0096359	0.00627821	0.00766432	0.0377781	0.0408152	0.00431916	0.00837534	0.242177	0.244089		437	-0.00471	0	-0.011	0	-0.00642	0	-0.01048	0	-0.01469	0	-0.00921	0	-0.00476	0
437.2	0.0372116	0.0334236	0.0920384	0.0828587	0.493564	0.501205	1.20651	1.21009	0.963351	0.964484	0.0450267	0.0401991	0.178812	0.178693		437.2	0.513235	0.50708	0.0897876	0.091619	0.00768297	0.00963603	0.00678753	0.00766444	0.0380858	0.0408155	0.00451993	0.00837547	0.242502	0.244089		437.2	-0.00454	0	-0.01058	0	-0.0067	0	-0.0106	0	-0.01424	0	-0.00913	0	-0.00451	0
437.4	0.0372242	0.0334567	0.0921494	0.0829382	0.493668	0.501565	1.20667	1.21011	0.963557	0.964814	0.0449138	0.0402386	0.178511	0.178853		437.4	0.5132	0.50708	0.0897528	0.0916192	0.00735262	0.00963615	0.00684092	0.00766456	0.0378204	0.0408158	0.00421209	0.0083756	0.242413	0.244089		437.4	-0.00466	0	-0.01107	0	-0.0071	0	-0.01103	0	-0.01441	0	-0.0091	0	-0.00494	0
437.6	0.0372492	0.0334898	0.0920676	0.0830178	0.494284	0.501924	1.20701	1.21014	0.964206	0.965143	0.0453166	0.0402781	0.179161	0.179013		437.6	0.513645	0.50708	0.0901805	0.0916194	0.00735144	0.00963627	0.00690238	0.00766468	0.0382422	0.0408162	0.00462104	0.00837572	0.242619	0.244089		437.6	-0.00472	0	-0.01123	0	-0.00742	0	-0.01156	0	-0.01439	0	-0.00929	0	-0.00516	0
437.8	0.0368934	0.0335229	0.0917353	0.0830973	0.494436	0.502284	1.20669	1.21016	0.964175	0.965471	0.044706	0.0403176	0.178807	0.179173		437.8	0.513527	0.50708	0.0902333	0.0916196	0.00767128	0.0096364	0.00770094	0.0076648	0.0385377	0.0408165	0.00506863	0.00837585	0.243182	0.244089		437.8	-0.0047	0	-0.01146	0	-0.00773	0	-0.01118	0	-0.0141	0	-0.00966	0	-0.00514	0
438	0.0370306	0.0335559	0.0923341	0.0831768	0.494779	0.502643	1.20674	1.21019	0.964745	0.965799	0.0447427	0.0403571	0.178954	0.179332		438	0.513534	0.50708	0.0906622	0.0916197	0.0077829	0.00963652	0.0081379	0.00766492	0.0384816	0.0408168	0.0053436	0.00837597	0.243555	0.244089		438	-0.00509	0	-0.01203	0	-0.00767	0	-0.01156	0	-0.01451	0	-0.00983	0	-0.00521	0
438.2	0.0368783	0.033589	0.0928939	0.0832563	0.495259	0.503001	1.20701	1.21021	0.965785	0.966126	0.04531	0.0403966	0.179392	0.179492		438.2	0.513415	0.50708	0.0913498	0.0916199	0.0082745	0.00963664	0.00860145	0.00766504	0.0392492	0.0408171	0.00621466	0.00837609	0.244568	0.244089		438.2	-0.00535	0	-0.012	0	-0.00762	0	-0.01134	0	-0.01336	0	-0.00995	0	-0.00432	0
438.4	0.0372161	0.0336221	0.0935882	0.0833358	0.49622	0.50336	1.20764	1.21024	0.966753	0.966453	0.0452254	0.040436	0.180104	0.179652		438.4	0.513008	0.50708	0.0914415	0.0916201	0.00831122	0.00963676	0.00823714	0.00766516	0.0392231	0.0408174	0.00667026	0.00837622	0.244862	0.244089		438.4	-0.00547	0	-0.01209	0	-0.00713	0	-0.01127	0	-0.01289	0	-0.00954	0	-0.00413	0
438.6	0.0376351	0.0336552	0.0937491	0.0834153	0.496435	0.503718	1.20814	1.21026	0.967371	0.966779	0.0450392	0.0404755	0.180766	0.179811		438.6	0.51273	0.50708	0.0916546	0.0916203	0.00879729	0.00963688	0.00767639	0.00766528	0.0391818	0.0408178	0.00686032	0.00837634	0.245155	0.244089		438.6	-0.00547	0	-0.01202	0	-0.00684	0	-0.01135	0	-0.0124	0	-0.00935	0	-0.00379	0
438.8	0.0384831	0.0336883	0.0942433	0.0834948	0.497757	0.504076	1.20907	1.21029	0.96867	0.967104	0.0453239	0.040515	0.181689	0.179971		438.8	0.512997	0.50708	0.0920061	0.0916204	0.00918999	0.009637	0.00789428	0.00766539	0.0393504	0.0408181	0.00762716	0.00837646	0.245615	0.244089		438.8	-0.0046	0	-0.0114	0	-0.00572	0	-0.01067	0	-0.01208	0	-0.00848	0	-0.00263	0
439	0.0390125	0.0337213	0.0945768	0.0835743	0.49855	0.504434	1.2094	1.21031	0.96915	0.967429	0.0450665	0.0405544	0.181996	0.18013		439	0.512834	0.50708	0.0925115	0.0916206	0.00980554	0.00963712	0.00775071	0.00766551	0.0398139	0.0408184	0.00818395	0.00837658	0.246143	0.244089		439	-0.00489	0	-0.01185	0	-0.00565	0	-0.01074	0	-0.01171	0	-0.00838	0	-0.00285	0
439.2	0.0397336	0.0337544	0.0951127	0.0836537	0.499599	0.504792	1.20964	1.21034	0.969521	0.967753	0.0449403	0.0405939	0.182675	0.18029		439.2	0.512794	0.50708	0.0927891	0.0916208	0.0102227	0.00963724	0.00784656	0.00766563	0.0403474	0.0408187	0.00858519	0.0083767	0.246384	0.244089		439.2	-0.00546	0	-0.01236	0	-0.00586	0	-0.01155	0	-0.01206	0	-0.00874	0	-0.00312	0
439.4	0.0402908	0.0337875	0.0956659	0.0837332	0.500389	0.505149	1.20994	1.21036	0.969798	0.968076	0.0447995	0.0406334	0.182549	0.180449		439.4	0.512662	0.50708	0.0928523	0.0916209	0.0106883	0.00963736	0.00727558	0.00766574	0.0401456	0.040819	0.00975847	0.00837682	0.246619	0.244089		439.4	-0.00564	0	-0.01273	0	-0.00599	0	-0.01145	0	-0.01222	0	-0.0084	0	-0.0028	0
439.6	0.0404839	0.0338205	0.095719	0.0838126	0.500855	0.505506	1.20982	1.21039	0.970203	0.968399	0.0447414	0.0406729	0.182694	0.180609		439.6	0.512571	0.50708	0.0925244	0.0916211	0.0105166	0.00963747	0.00722117	0.00766585	0.0403644	0.0408193	0.0101375	0.00837694	0.246533	0.244089		439.6	-0.00594	0	-0.01296	0	-0.00595	0	-0.01144	0	-0.01235	0	-0.00857	0	-0.00316	0
439.8	0.0404431	0.0338536	0.0955787	0.083892	0.501574	0.505863	1.20997	1.21041	0.970905	0.968721	0.0452617	0.0407123	0.182628	0.180768		439.8	0.513029	0.50708	0.0924134	0.0916213	0.0108751	0.00963759	0.00714757	0.00766597	0.0404004	0.0408196	0.0103129	0.00837706	0.24649	0.244089		439.8	-0.00548	0	-0.0127	0	-0.0052	0	-0.01104	0	-0.01258	0	-0.00767	0	-0.00293	0
440	0.0401382	0.0338867	0.0946912	0.0839715	0.501564	0.506219	1.20962	1.21044	0.970676	0.969042	0.044901	0.0407518	0.181811	0.180928		440	0.513035	0.50708	0.0928577	0.0916214	0.0113127	0.0096377	0.0068925	0.00766608	0.0410116	0.04082	0.0104377	0.00837717	0.246438	0.244089		440	-0.00529	0	-0.01252	0	-0.00473	0	-0.01079	0	-0.01256	0	-0.00736	0	-0.00281	0
440.2	0.0399419	0.0339197	0.0944209	0.0840509	0.501503	0.506576	1.20951	1.21046	0.97035	0.969363	0.0442942	0.0407912	0.181483	0.181087		440.2	0.513278	0.50708	0.0922092	0.0916216	0.0110163	0.00963782	0.00680681	0.00766619	0.0403866	0.0408203	0.0103641	0.00837729	0.245755	0.244089		440.2	-0.00561	0	-0.01271	0	-0.00456	0	-0.01063	0	-0.01296	0	-0.00701	0	-0.00335	0
440.4	0.0403469	0.0339528	0.0945881	0.0841303	0.501712	0.506932	1.20928	1.21048	0.970243	0.969684	0.0448588	0.0408307	0.18205	0.181246		440.4	0.513384	0.50708	0.092096	0.0916217	0.0107784	0.00963793	0.00708075	0.0076663	0.0402938	0.0408205	0.0106407	0.0083774	0.244977	0.244089		440.4	-0.00499	0	-0.01219	0	-0.00481	0	-0.01056	0	-0.01311	0	-0.00685	0	-0.00396	0
440.6	0.0398474	0.0339859	0.0938113	0.0842097	0.500983	0.507288	1.20876	1.21051	0.969734	0.970003	0.0445673	0.0408701	0.18136	0.181405		440.6	0.513821	0.50708	0.0925822	0.0916219	0.0106013	0.00963805	0.00746075	0.00766641	0.0401022	0.0408208	0.0106602	0.00837752	0.244813	0.244089		440.6	-0.00492	0	-0.01157	0	-0.0045	0	-0.00999	0	-0.01333	0	-0.00732	0	-0.00429	0
440.8	0.0395909	0.0340189	0.0935345	0.0842891	0.50118	0.507643	1.20873	1.21053	0.970251	0.970322	0.0451856	0.0409096	0.181477	0.181565		440.8	0.514358	0.50708	0.0922999	0.091622	0.0105389	0.00963816	0.00802934	0.00766652	0.0400354	0.0408212	0.0103784	0.00837763	0.244451	0.244089		440.8	-0.00507	0	-0.01193	0	-0.00494	0	-0.01044	0	-0.0141	0	-0.00806	0	-0.00497	0
441	0.0396959	0.034052	0.0934255	0.0843685	0.501533	0.507999	1.20923	1.21055	0.970422	0.970641	0.0456262	0.040949	0.181879	0.181724		441	0.514734	0.50708	0.0921016	0.0916222	0.0104811	0.00963827	0.00826158	0.00766663	0.0399454	0.0408214	0.00996544	0.00837775	0.244703	0.244089		441	-0.00472	0	-0.01195	0	-0.00499	0	-0.0104	0	-0.01402	0	-0.0081	0	-0.00501	0
441.2	0.0396412	0.034085	0.0931806	0.0844478	0.501502	0.508354	1.20964	1.21058	0.97042	0.970959	0.0455226	0.0409885	0.181964	0.181883		441.2	0.514985	0.50708	0.0924508	0.0916224	0.0102071	0.00963838	0.00821251	0.00766674	0.0398292	0.0408217	0.00908718	0.00837786	0.24446	0.244089		441.2	-0.00429	0	-0.01182	0	-0.00567	0	-0.01014	0	-0.01408	0	-0.00811	0	-0.00522	0
441.4	0.0396496	0.0341181	0.0931254	0.0845272	0.501448	0.508709	1.20925	1.2106	0.970495	0.971276	0.0457681	0.0410279	0.181819	0.182042		441.4	0.514439	0.50708	0.0922565	0.0916225	0.0096953	0.00963849	0.00812874	0.00766685	0.0395037	0.040822	0.00856243	0.00837797	0.244527	0.244089		441.4	-0.00439	0	-0.01214	0	-0.0058	0	-0.00989	0	-0.01467	0	-0.00855	0	-0.00594	0
441.6	0.0393628	0.0341512	0.0928253	0.0846066	0.501751	0.509064	1.20911	1.21062	0.970571	0.971593	0.0458657	0.0410674	0.182029	0.182201		441.6	0.514571	0.50708	0.0921978	0.0916226	0.00972361	0.0096386	0.00830662	0.00766696	0.0392249	0.0408223	0.00839651	0.00837808	0.244915	0.244089		441.6	-0.00423	0	-0.01202	0	-0.00587	0	-0.00976	0	-0.01454	0	-0.00909	0	-0.00583	0
441.8	0.0391758	0.0341842	0.0927413	0.0846859	0.501954	0.509418	1.20882	1.21065	0.970588	0.971909	0.0458981	0.0411068	0.182455	0.18236		441.8	0.5144	0.50708	0.0920667	0.0916228	0.00946813	0.00963871	0.00871964	0.00766706	0.0393772	0.0408226	0.00815781	0.00837819	0.245291	0.244089		441.8	-0.00464	0	-0.01238	0	-0.00609	0	-0.00983	0	-0.01486	0	-0.00972	0	-0.00621	0
442	0.0395431	0.0342173	0.0932147	0.0847653	0.502577	0.509772	1.20908	1.21067	0.970927	0.972224	0.0465339	0.0411462	0.183081	0.182519		442	0.514191	0.50708	0.0924731	0.0916229	0.00948786	0.00963882	0.00904548	0.00766717	0.0394234	0.0408229	0.00825141	0.0083783	0.245598	0.244089		442	-0.00453	0	-0.01257	0	-0.00577	0	-0.01026	0	-0.01442	0	-0.00937	0	-0.00635	0
442.2	0.0392769	0.0342503	0.0928076	0.0848446	0.502538	0.510126	1.20887	1.21069	0.970676	0.972539	0.0463712	0.0411856	0.183016	0.182678		442.2	0.514037	0.50708	0.0922835	0.0916231	0.00935037	0.00963893	0.00877447	0.00766728	0.039338	0.0408232	0.00832239	0.00837841	0.2454	0.244089		442.2	-0.0047	0	-0.01235	0	-0.00605	0	-0.01003	0	-0.01393	0	-0.00955	0	-0.00572	0
442.4	0.0393093	0.0342834	0.0925844	0.0849239	0.502623	0.51048	1.20893	1.21071	0.97084	0.972853	0.0460554	0.0412251	0.18343	0.182837		442.4	0.51342	0.50708	0.0917043	0.0916232	0.00899189	0.00963903	0.00811944	0.00766738	0.0390389	0.0408234	0.00831769	0.00837852	0.244382	0.244089		442.4	-0.00476	0	-0.01254	0	-0.00593	0	-0.00994	0	-0.01379	0	-0.00908	0	-0.00572	0
442.6	0.0396459	0.0343164	0.0925391	0.0850032	0.50293	0.510834	1.20894	1.21074	0.971064	0.973167	0.0458902	0.0412645	0.183557	0.182996		442.6	0.512636	0.50708	0.0917099	0.0916234	0.00884901	0.00963914	0.00780573	0.00766748	0.0386278	0.0408237	0.00799458	0.00837863	0.244107	0.244089		442.6	-0.004	0	-0.01207	0	-0.0062	0	-0.00967	0	-0.01329	0	-0.00859	0	-0.00493	0
442.8	0.0399693	0.0343495	0.0927441	0.0850825	0.503915	0.511187	1.20901	1.21076	0.972166	0.97348	0.0458148	0.0413039	0.183844	0.183154		442.8	0.513125	0.50708	0.0921407	0.0916235	0.00908391	0.00963924	0.00822967	0.00766759	0.0393319	0.040824	0.00840683	0.00837874	0.244521	0.244089		442.8	-0.00403	0	-0.01241	0	-0.00616	0	-0.01009	0	-0.01359	0	-0.00847	0	-0.00483	0
443	0.0395242	0.0343825	0.0926213	0.0851618	0.503875	0.51154	1.20823	1.21078	0.971356	0.973792	0.04486	0.0413434	0.183341	0.183313		443	0.51292	0.50708	0.0924737	0.0916237	0.00977947	0.00963935	0.00851708	0.00766769	0.0395378	0.0408243	0.00863777	0.00837884	0.24527	0.244089		443	-0.00415	0	-0.01249	0	-0.00633	0	-0.01016	0	-0.01355	0	-0.00855	0	-0.00481	0
443.2	0.0400798	0.0344155	0.0926537	0.0852411	0.504411	0.511893	1.20793	1.2108	0.971489	0.974104	0.0449133	0.0413828	0.183491	0.183472		443.2	0.512808	0.50708	0.0925872	0.0916238	0.0104775	0.00963945	0.00851774	0.00766779	0.039927	0.0408246	0.00844699	0.00837895	0.245557	0.244089		443.2	-0.00381	0	-0.01172	0	-0.00613	0	-0.01014	0	-0.01306	0	-0.00828	0	-0.00432	0
443.4	0.0404231	0.0344486	0.0931749	0.0853204	0.50525	0.512245	1.20859	1.21083	0.972716	0.974416	0.0456825	0.0414222	0.183533	0.183631		443.4	0.512523	0.50708	0.0925877	0.0916239	0.0106628	0.00963956	0.00797444	0.00766789	0.0399153	0.0408248	0.00861809	0.00837905	0.245502	0.244089		443.4	-0.00376	0	-0.01159	0	-0.00584	0	-0.00972	0	-0.01298	0	-0.00742	0	-0.00408	0
443.6	0.0403963	0.0344816	0.0929842	0.0853996	0.505679	0.512598	1.20861	1.21085	0.973368	0.974726	0.0457358	0.0414616	0.183761	0.183789		443.6	0.512779	0.50708	0.0928045	0.0916241	0.0103393	0.00963966	0.00781626	0.007668	0.0402524	0.0408251	0.00853254	0.00837916	0.245348	0.244089		443.6	-0.00364	0	-0.01106	0	-0.00522	0	-0.00939	0	-0.01255	0	-0.00702	0	-0.00418	0
443.8	0.0402567	0.0345147	0.0932557	0.0854789	0.506158	0.51295	1.20874	1.21087	0.973597	0.975036	0.0462062	0.041501	0.18396	0.183948		443.8	0.513131	0.50708	0.0928419	0.0916242	0.0104219	0.00963976	0.00746063	0.0076681	0.040297	0.0408254	0.00866961	0.00837926	0.245077	0.244089		443.8	-0.00301	0	-0.01067	0	-0.0041	0	-0.00933	0	-0.01242	0	-0.00617	0	-0.00361	0
444	0.0401706	0.0345477	0.0935116	0.0855582	0.506325	0.513302	1.20855	1.21089	0.973591	0.975346	0.0460562	0.0415404	0.184179	0.184106		444	0.512708	0.50708	0.0926783	0.0916244	0.0101385	0.00963986	0.00692441	0.0076682	0.0403544	0.0408256	0.00809383	0.00837937	0.244699	0.244089		444	-0.00311	0	-0.01057	0	-0.0042	0	-0.00995	0	-0.01251	0	-0.00636	0	-0.00349	0
444.2	0.0403153	0.0345807	0.0940367	0.0856374	0.506885	0.513654	1.20893	1.21091	0.974002	0.975655	0.0461936	0.0415798	0.184404	0.184265		444.2	0.513571	0.50708	0.0929442	0.0916245	0.0100962	0.00963996	0.00700101	0.00766829	0.0404809	0.0408259	0.0084621	0.00837947	0.244308	0.244089		444.2	-0.0038	0	-0.0107	0	-0.0045	0	-0.01041	0	-0.01296	0	-0.00695	0	-0.00389	0
444.4	0.04024	0.0346138	0.0944653	0.0857166	0.507238	0.514005	1.20911	1.21093	0.974349	0.975963	0.046615	0.0416192	0.184602	0.184423		444.4	0.513647	0.50708	0.092681	0.0916246	0.0101655	0.00964006	0.00683211	0.00766839	0.0407402	0.0408261	0.00843166	0.00837957	0.243985	0.244089		444.4	-0.00293	0	-0.01047	0	-0.00418	0	-0.01034	0	-0.01268	0	-0.00716	0	-0.00401	0
444.6	0.0394764	0.0346468	0.0939949	0.0857959	0.507119	0.514356	1.20877	1.21095	0.974527	0.976271	0.0467215	0.0416586	0.184319	0.184582		444.6	0.513681	0.50708	0.0923383	0.0916248	0.00998807	0.00964016	0.00648024	0.00766849	0.0406278	0.0408264	0.00819218	0.00837967	0.244218	0.244089		444.6	-0.00275	0	-0.01066	0	-0.00384	0	-0.01028	0	-0.01249	0	-0.00722	0	-0.00348	0
444.8	0.0394796	0.0346798	0.0946039	0.0858751	0.507744	0.514707	1.20947	1.21098	0.975329	0.976578	0.0474197	0.041698	0.184772	0.18474		444.8	0.513652	0.50708	0.0919118	0.0916249	0.00931297	0.00964026	0.00646194	0.00766859	0.0402572	0.0408267	0.00759487	0.00837977	0.243936	0.244089		444.8	-0.00285	0	-0.01109	0	-0.00409	0	-0.01058	0	-0.01285	0	-0.00745	0	-0.00396	0
445	0.039547	0.0347128	0.0944069	0.0859543	0.508243	0.515058	1.21009	1.211	0.975741	0.976884	0.0470779	0.0417374	0.184975	0.184899		445	0.513484	0.50708	0.0913183	0.091625	0.00918815	0.00964036	0.00612003	0.00766869	0.0401431	0.0408269	0.00715718	0.00837987	0.244108	0.244089		445	-0.00282	0	-0.01178	0	-0.00434	0	-0.01065	0	-0.01304	0	-0.00766	0	-0.00429	0
445.2	0.0392355	0.0347459	0.0943972	0.0860335	0.507681	0.515408	1.20968	1.21102	0.975981	0.97719	0.0468536	0.0417768	0.184651	0.185057		445.2	0.513495	0.50708	0.0912127	0.0916252	0.00901142	0.00964046	0.00611449	0.00766878	0.0401591	0.0408272	0.00698377	0.00837997	0.244195	0.244089		445.2	-0.0029	0	-0.01221	0	-0.00484	0	-0.01068	0	-0.01348	0	-0.00827	0	-0.00455	0
445.4	0.0389678	0.0347789	0.0950049	0.0861127	0.508534	0.515759	1.20978	1.21104	0.976254	0.977496	0.0470798	0.0418162	0.184669	0.185215		445.4	0.513105	0.50708	0.0909039	0.0916253	0.00882331	0.00964056	0.00599488	0.00766888	0.0396632	0.0408274	0.00709919	0.00838007	0.244352	0.244089		445.4	-0.00308	0	-0.0126	0	-0.00485	0	-0.0113	0	-0.01386	0	-0.00939	0	-0.00493	0
445.6	0.038888	0.0348119	0.094701	0.0861919	0.508927	0.516109	1.2098	1.21106	0.975924	0.9778	0.0469185	0.0418556	0.185002	0.185374		445.6	0.51314	0.50708	0.0902883	0.0916254	0.00886208	0.00964065	0.00617198	0.00766897	0.0393319	0.0408277	0.00721972	0.00838017	0.24461	0.244089		445.6	-0.00301	0	-0.01292	0	-0.00462	0	-0.01115	0	-0.01373	0	-0.00935	0	-0.00429	0
445.8	0.0386099	0.0348449	0.094759	0.086271	0.509336	0.516458	1.20976	1.21108	0.975792	0.978105	0.0473021	0.041895	0.185056	0.185532		445.8	0.512937	0.50708	0.0899905	0.0916255	0.00858827	0.00964075	0.00656948	0.00766907	0.0398672	0.0408279	0.00726653	0.00838027	0.244529	0.244089		445.8	-0.00333	0	-0.0135	0	-0.0049	0	-0.01148	0	-0.01368	0	-0.00982	0	-0.00484	0
446	0.0386848	0.0348779	0.0942633	0.0863502	0.509337	0.516808	1.20995	1.2111	0.975686	0.978408	0.0469777	0.0419344	0.184798	0.18569		446	0.51284	0.50708	0.0903805	0.0916257	0.0086985	0.00964084	0.00721762	0.00766916	0.0399154	0.0408282	0.00792914	0.00838037	0.244446	0.244089		446	-0.00286	0	-0.01322	0	-0.00469	0	-0.01147	0	-0.01348	0	-0.00954	0	-0.0046	0
446.2	0.0381631	0.034911	0.0942157	0.0864293	0.509468	0.517157	1.20967	1.21112	0.975483	0.978711	0.0466531	0.0419737	0.184613	0.185848		446.2	0.512875	0.50708	0.0901508	0.0916258	0.00856706	0.00964094	0.00749923	0.00766926	0.0396399	0.0408284	0.00813681	0.00838046	0.243659	0.244089		446.2	-0.00367	0	-0.0136	0	-0.00533	0	-0.01126	0	-0.0138	0	-0.00991	0	-0.00459	0
446.4	0.0383388	0.034944	0.0944128	0.0865085	0.509756	0.517506	1.21009	1.21114	0.976168	0.979014	0.0463626	0.0420131	0.184947	0.186006		446.4	0.513046	0.50708	0.0902426	0.0916259	0.00890445	0.00964103	0.00821867	0.00766935	0.0398988	0.0408287	0.00866996	0.00838056	0.243648	0.244089		446.4	-0.00363	0	-0.01321	0	-0.00534	0	-0.01129	0	-0.01378	0	-0.0095	0	-0.00463	0
446.6	0.0385653	0.034977	0.09429	0.0865876	0.51023	0.517855	1.20994	1.21116	0.976009	0.979315	0.0462552	0.0420525	0.184673	0.186164		446.6	0.513556	0.50708	0.090339	0.091626	0.00931671	0.00964113	0.00903227	0.00766944	0.0398571	0.0408289	0.00875632	0.00838066	0.244303	0.244089		446.6	-0.00394	0	-0.0131	0	-0.00586	0	-0.01166	0	-0.01403	0	-0.00975	0	-0.00464	0
446.8	0.0384519	0.03501	0.0944036	0.0866668	0.510608	0.518204	1.20985	1.21118	0.976264	0.979617	0.0458753	0.0420919	0.184899	0.186322		446.8	0.514438	0.50708	0.0911453	0.0916262	0.0103401	0.00964122	0.00981139	0.00766953	0.040738	0.0408292	0.00993517	0.00838075	0.245394	0.244089		446.8	-0.00441	0	-0.01301	0	-0.00583	0	-0.0118	0	-0.01427	0	-0.00989	0	-0.00486	0
447	0.0383699	0.035043	0.0946052	0.0867459	0.510678	0.518552	1.20994	1.2112	0.975912	0.979917	0.0456843	0.0421312	0.185304	0.18648		447	0.514384	0.50708	0.0914168	0.0916263	0.0108572	0.00964131	0.0100058	0.00766962	0.04036	0.0408294	0.0102038	0.00838085	0.245937	0.244089		447	-0.00408	0	-0.01217	0	-0.00568	0	-0.01156	0	-0.01422	0	-0.00968	0	-0.00489	0
447.2	0.0386039	0.035076	0.0946808	0.086825	0.511282	0.5189	1.21028	1.21122	0.976606	0.980218	0.0456745	0.0421706	0.185604	0.186638		447.2	0.514054	0.50708	0.0919313	0.0916264	0.0112601	0.0096414	0.0099119	0.00766971	0.0406439	0.0408296	0.010512	0.00838094	0.245799	0.244089		447.2	-0.00427	0	-0.01145	0	-0.00561	0	-0.01166	0	-0.01416	0	-0.00953	0	-0.00485	0
447.4	0.0389534	0.035109	0.0953922	0.0869041	0.512096	0.519248	1.21108	1.21124	0.977631	0.980517	0.0460747	0.04221	0.185977	0.186796		447.4	0.514011	0.50708	0.0923089	0.0916265	0.0111279	0.0096415	0.00961468	0.0076698	0.0405672	0.0408299	0.010552	0.00838103	0.245807	0.244089		447.4	-0.004	0	-0.01112	0	-0.00561	0	-0.01163	0	-0.0143	0	-0.00902	0	-0.00454	0
447.6	0.0389381	0.0351421	0.0954972	0.0869832	0.512637	0.519596	1.21081	1.21126	0.977522	0.980816	0.0458201	0.0422493	0.18638	0.186954		447.6	0.514247	0.50708	0.0924532	0.0916266	0.01117	0.00964159	0.00962738	0.00766989	0.0407097	0.0408301	0.0106054	0.00838113	0.245618	0.244089		447.6	-0.00369	0	-0.01101	0	-0.00558	0	-0.01145	0	-0.01397	0	-0.00888	0	-0.00473	0
447.8	0.0389364	0.035175	0.0960824	0.0870623	0.512897	0.519944	1.21073	1.21128	0.977937	0.981115	0.0462145	0.0422887	0.187026	0.187112		447.8	0.514332	0.50708	0.0925542	0.0916267	0.0111759	0.00964168	0.00958124	0.00766998	0.0407775	0.0408304	0.0103563	0.00838122	0.245873	0.244089		447.8	-0.00348	0	-0.01087	0	-0.00541	0	-0.01151	0	-0.01411	0	-0.00867	0	-0.00478	0
448	0.0393311	0.035208	0.0960957	0.0871414	0.51315	0.520291	1.21107	1.2113	0.978449	0.981413	0.0460262	0.042328	0.187414	0.187269		448	0.514363	0.50708	0.092434	0.0916268	0.0110734	0.00964177	0.00936666	0.00767007	0.0407911	0.0408306	0.00988417	0.00838131	0.246153	0.244089		448	-0.00365	0	-0.01092	0	-0.00613	0	-0.0116	0	-0.01409	0	-0.00904	0	-0.00512	0
448.2	0.0388181	0.0352411	0.0962247	0.0872204	0.513642	0.520638	1.21116	1.21132	0.979025	0.98171	0.0461996	0.0423674	0.187724	0.187427		448.2	0.514775	0.50708	0.0925743	0.091627	0.011414	0.00964186	0.00961617	0.00767016	0.0408962	0.0408308	0.00998466	0.0083814	0.246232	0.244089		448.2	-0.00353	0	-0.01095	0	-0.00583	0	-0.01143	0	-0.01377	0	-0.00889	0	-0.00544	0
448.4	0.0386964	0.0352741	0.0964786	0.0872995	0.513918	0.520985	1.21092	1.21133	0.97911	0.982007	0.0463892	0.0424068	0.188191	0.187585		448.4	0.514488	0.50708	0.0921505	0.0916271	0.0112204	0.00964194	0.00937194	0.00767025	0.0404384	0.040831	0.00935691	0.00838149	0.246084	0.244089		448.4	-0.00298	0	-0.01055	0	-0.00545	0	-0.01149	0	-0.01303	0	-0.00851	0	-0.00495	0
448.6	0.0385175	0.035307	0.0965819	0.0873785	0.513632	0.521331	1.21086	1.21135	0.979389	0.982303	0.0468621	0.0424461	0.18871	0.187743		448.6	0.514644	0.50708	0.091799	0.0916272	0.010834	0.00964203	0.0091777	0.00767033	0.0400877	0.0408313	0.00913661	0.00838158	0.246009	0.244089		448.6	-0.00252	0	-0.01041	0	-0.00529	0	-0.01128	0	-0.01279	0	-0.00805	0	-0.00476	0
448.8	0.0383467	0.03534	0.0965349	0.0874576	0.51404	0.521677	1.21098	1.21137	0.979842	0.982598	0.0466934	0.0424855	0.188785	0.1879		448.8	0.514615	0.50708	0.0916885	0.0916273	0.0105068	0.00964212	0.00967344	0.00767042	0.0399608	0.0408315	0.00888422	0.00838167	0.245832	0.244089		448.8	-0.00322	0	-0.01095	0	-0.00541	0	-0.01177	0	-0.01365	0	-0.00873	0	-0.00513	0
449	0.0387605	0.035373	0.0962489	0.0875366	0.514489	0.522024	1.21087	1.21139	0.98096	0.982893	0.0463419	0.0425248	0.189228	0.188058		449	0.514921	0.50708	0.0914782	0.0916274	0.010868	0.00964221	0.00972811	0.00767051	0.0399646	0.0408317	0.009254	0.00838176	0.245806	0.244089		449	-0.00292	0	-0.01114	0	-0.00472	0	-0.01123	0	-0.01339	0	-0.00856	0	-0.0045	0
449.2	0.0388222	0.035406	0.0970077	0.0876156	0.514709	0.522369	1.2108	1.21141	0.981518	0.983188	0.0464533	0.0425641	0.189323	0.188215		449.2	0.514847	0.50708	0.0912011	0.0916275	0.0105408	0.00964229	0.00939387	0.00767059	0.0397093	0.0408319	0.00889584	0.00838185	0.245139	0.244089		449.2	-0.00297	0	-0.01138	0	-0.00472	0	-0.01093	0	-0.01338	0	-0.00873	0	-0.00403	0
449.4	0.0388	0.035439	0.0972059	0.0876946	0.515738	0.522715	1.2112	1.21143	0.982087	0.983482	0.0468958	0.0426035	0.189737	0.188373		449.4	0.514797	0.50708	0.0907822	0.0916276	0.010287	0.00964238	0.00902494	0.00767068	0.0391024	0.0408322	0.00860898	0.00838194	0.244902	0.244089		449.4	-0.00258	0	-0.01173	0	-0.00425	0	-0.01081	0	-0.01331	0	-0.00861	0	-0.00352	0
449.6	0.0393141	0.035472	0.0972211	0.0877736	0.515986	0.52306	1.21143	1.21145	0.982642	0.983775	0.0471647	0.0426428	0.189916	0.18853		449.6	0.515435	0.50708	0.0909414	0.0916277	0.0104509	0.00964246	0.00921628	0.00767076	0.039452	0.0408324	0.00874408	0.00838202	0.245233	0.244089		449.6	-0.00248	0	-0.01189	0	-0.00391	0	-0.01039	0	-0.01308	0	-0.00788	0	-0.00307	0
449.8	0.0390315	0.035505	0.0971565	0.0878526	0.516593	0.523406	1.21181	1.21146	0.98296	0.984068	0.0474296	0.0426822	0.189895	0.188688		449.8	0.514824	0.50708	0.0907582	0.0916278	0.00984056	0.00964255	0.00863018	0.00767084	0.0394601	0.0408326	0.00822127	0.00838211	0.244788	0.24409		449.8	-0.00291	0	-0.01209	0	-0.00424	0	-0.01063	0	-0.0131	0	-0.00815	0	-0.00378	0
450	0.0392644	0.035538	0.0971417	0.0879316	0.516905	0.523751	1.21188	1.21148	0.983612	0.98436	0.0473072	0.0427215	0.190201	0.188845		450	0.514782	0.50708	0.0907194	0.0916279	0.00992427	0.00964263	0.00874661	0.00767093	0.0394875	0.0408328	0.00837166	0.0083822	0.244871	0.24409		450	-0.00309	0	-0.01204	0	-0.00435	0	-0.01033	0	-0.01328	0	-0.00794	0	-0.00353	0
450.2	0.0396126	0.035571	0.0975756	0.0880106	0.517678	0.524095	1.21187	1.2115	0.983897	0.984652	0.0477067	0.0427608	0.190723	0.189002		450.2	0.515233	0.50708	0.0908201	0.0916281	0.0100815	0.00964272	0.00890665	0.00767101	0.039615	0.040833	0.00839934	0.00838228	0.244944	0.24409		450.2	-0.00392	0	-0.01231	0	-0.00473	0	-0.01005	0	-0.01343	0	-0.00799	0	-0.0036	0
450.4	0.0398855	0.035604	0.0974192	0.0880896	0.518038	0.52444	1.21214	1.21152	0.98411	0.984943	0.0477311	0.0428001	0.190952	0.18916		450.4	0.515237	0.50708	0.0908696	0.0916282	0.0101006	0.0096428	0.00866753	0.00767109	0.0399526	0.0408332	0.00881513	0.00838237	0.245281	0.24409		450.4	-0.00426	0	-0.01219	0	-0.00458	0	-0.01024	0	-0.01346	0	-0.00789	0	-0.00359	0
450.6	0.0398029	0.0356369	0.0976706	0.0881685	0.518264	0.524784	1.21207	1.21154	0.983885	0.985233	0.0480069	0.0428395	0.191119	0.189317		450.6	0.514938	0.50708	0.0912477	0.0916283	0.0103539	0.00964288	0.00843238	0.00767117	0.0398358	0.0408335	0.00892606	0.00838245	0.245336	0.24409		450.6	-0.0044	0	-0.0124	0	-0.00526	0	-0.01011	0	-0.01379	0	-0.00796	0	-0.00385	0
450.8	0.0398077	0.0356699	0.097307	0.0882475	0.518389	0.525128	1.21202	1.21155	0.983678	0.985523	0.0479475	0.0428788	0.19096	0.189474		450.8	0.514661	0.50708	0.0915807	0.0916284	0.0105359	0.00964296	0.00773579	0.00767126	0.0399589	0.0408337	0.0091076	0.00838254	0.245233	0.24409		450.8	-0.0045	0	-0.01228	0	-0.00546	0	-0.01041	0	-0.01389	0	-0.00787	0	-0.00383	0
451	0.0401953	0.0357029	0.0974273	0.0883265	0.518783	0.525472	1.21198	1.21157	0.983792	0.985813	0.0483787	0.0429181	0.191228	0.189631		451	0.514109	0.50708	0.0913625	0.0916285	0.0102682	0.00964305	0.00708722	0.00767134	0.0394195	0.0408339	0.00880065	0.00838262	0.244811	0.24409		451	-0.00486	0	-0.01196	0	-0.00574	0	-0.01058	0	-0.01419	0	-0.00783	0	-0.00365	0
451.2	0.0402152	0.0357359	0.0972276	0.0884054	0.518728	0.525815	1.21179	1.21159	0.983777	0.986102	0.0481493	0.0429574	0.190751	0.189789		451.2	0.513816	0.50708	0.0918084	0.0916286	0.0105584	0.00964313	0.00690933	0.00767142	0.0395796	0.0408341	0.00941238	0.0083827	0.245134	0.24409		451.2	-0.00528	0	-0.01177	0	-0.00583	0	-0.01061	0	-0.01394	0	-0.00793	0	-0.00329	0
451.4	0.0405272	0.0357689	0.0971976	0.0884843	0.519233	0.526159	1.21169	1.21161	0.983933	0.98639	0.0486762	0.0429967	0.190646	0.189946		451.4	0.513049	0.50708	0.09176	0.0916287	0.0101544	0.00964321	0.00666693	0.0076715	0.0389693	0.0408343	0.00884295	0.00838279	0.245011	0.24409		451.4	-0.005	0	-0.01206	0	-0.00601	0	-0.01011	0	-0.01355	0	-0.00805	0	-0.00316	0
451.6	0.0409106	0.0358018	0.0968635	0.0885632	0.519583	0.526502	1.21126	1.21162	0.983541	0.986678	0.0484615	0.043036	0.190675	0.190103		451.6	0.513135	0.50708	0.0920467	0.0916288	0.0102162	0.00964329	0.00677072	0.00767158	0.0394468	0.0408345	0.00947163	0.00838287	0.245233	0.24409		451.6	-0.00523	0	-0.01226	0	-0.0062	0	-0.0103	0	-0.01343	0	-0.00854	0	-0.0036	0
451.8	0.0409557	0.0358348	0.0967452	0.0886421	0.519553	0.526845	1.21125	1.21164	0.983478	0.986965	0.0483453	0.0430754	0.190455	0.19026		451.8	0.51384	0.50708	0.0927887	0.0916289	0.010553	0.00964337	0.00734841	0.00767166	0.0398827	0.0408347	0.0100445	0.00838295	0.246253	0.24409		451.8	-0.00515	0	-0.01208	0	-0.00639	0	-0.01034	0	-0.01352	0	-0.00845	0	-0.00399	0
452	0.0406537	0.0358678	0.0963197	0.088721	0.519057	0.527187	1.21101	1.21166	0.983128	0.987252	0.0479238	0.0431147	0.190096	0.190417		452	0.514021	0.50708	0.0926995	0.091629	0.0109487	0.00964345	0.00765888	0.00767173	0.0403333	0.0408349	0.0104332	0.00838303	0.246528	0.24409		452	-0.00501	0	-0.01204	0	-0.00673	0	-0.01078	0	-0.01314	0	-0.00898	0	-0.00415	0
452.2	0.0403905	0.0359007	0.0968544	0.0887999	0.519247	0.52753	1.21094	1.21168	0.983258	0.987538	0.0480387	0.043154	0.19031	0.190574		452.2	0.514224	0.50708	0.093046	0.0916291	0.0114103	0.00964352	0.00816911	0.00767181	0.0405503	0.0408351	0.0101714	0.00838311	0.246802	0.24409		452.2	-0.00436	0	-0.01144	0	-0.00603	0	-0.01094	0	-0.01268	0	-0.00842	0	-0.00377	0
452.4	0.0406786	0.0359337	0.0968708	0.0888788	0.519603	0.527872	1.21114	1.21169	0.983218	0.987823	0.0482762	0.0431933	0.190062	0.190731		452.4	0.514066	0.50708	0.092776	0.0916292	0.0113235	0.0096436	0.00830124	0.00767189	0.0407376	0.0408353	0.0104091	0.00838319	0.246655	0.24409		452.4	-0.00416	0	-0.01121	0	-0.00557	0	-0.01128	0	-0.01233	0	-0.00836	0	-0.00303	0
452.6	0.0406885	0.0359667	0.09677	0.0889577	0.51992	0.528214	1.21072	1.21171	0.983593	0.988108	0.0480455	0.0432326	0.189885	0.190887		452.6	0.514806	0.50708	0.0928423	0.0916292	0.0118593	0.00964368	0.00947875	0.00767197	0.0410741	0.0408355	0.0106679	0.00838327	0.246671	0.24409		452.6	-0.00359	0	-0.01102	0	-0.00476	0	-0.01101	0	-0.0122	0	-0.00794	0	-0.00305	0
452.8	0.0408702	0.0359996	0.0967986	0.0890366	0.52059	0.528556	1.21072	1.21173	0.984306	0.988393	0.0479221	0.0432719	0.189913	0.191044		452.8	0.515284	0.50708	0.0930351	0.0916293	0.0124597	0.00964376	0.0103591	0.00767204	0.0414612	0.0408357	0.0109336	0.00838335	0.246848	0.24409		452.8	-0.00361	0	-0.01086	0	-0.00393	0	-0.01082	0	-0.0119	0	-0.00792	0	-0.00306	0
453	0.0415199	0.0360326	0.0973018	0.0891154	0.521076	0.528897	1.21128	1.21174	0.985347	0.988677	0.0481354	0.0433112	0.189954	0.191201		453	0.515518	0.50708	0.0929313	0.0916294	0.0123426	0.00964383	0.0101154	0.00767212	0.0413195	0.0408359	0.0110184	0.00838343	0.246198	0.24409		453	-0.00269	0	-0.01025	0	-0.00287	0	-0.01009	0	-0.01099	0	-0.00709	0	-0.00252	0
453.2	0.0416047	0.0360656	0.0982229	0.0891943	0.521772	0.529239	1.21219	1.21176	0.986096	0.98896	0.0487393	0.0433505	0.190419	0.191358		453.2	0.515666	0.50708	0.0926607	0.0916295	0.011862	0.00964391	0.0100452	0.0076722	0.0411946	0.0408361	0.0108694	0.00838351	0.246261	0.24409		453.2	-0.00201	0	-0.01042	0	-0.00295	0	-0.01017	0	-0.01075	0	-0.00702	0	-0.00258	0
453.4	0.0415273	0.0360985	0.0981629	0.0892731	0.522328	0.52958	1.21283	1.21178	0.986577	0.989243	0.0488706	0.0433897	0.190924	0.191515		453.4	0.516026	0.50708	0.0928312	0.0916296	0.0120715	0.00964399	0.0100532	0.00767227	0.0412112	0.0408363	0.010866	0.00838358	0.24661	0.24409		453.4	-0.00169	0	-0.01058	0	-0.00252	0	-0.01037	0	-0.01079	0	-0.00656	0	-0.00253	0
453.6	0.0419162	0.0361315	0.0982303	0.0893519	0.522979	0.529921	1.21357	1.21179	0.987323	0.989525	0.0490847	0.043429	0.191229	0.191671		453.6	0.515989	0.50708	0.0930484	0.0916297	0.0119162	0.00964406	0.0101036	0.00767235	0.0415911	0.0408365	0.0102968	0.00838366	0.246736	0.24409		453.6	-0.00159	0	-0.01015	0	-0.00258	0	-0.01058	0	-0.01035	0	-0.00625	0	-0.00238	0
453.8	0.0416037	0.0361644	0.0980935	0.0894308	0.523635	0.530261	1.21393	1.21181	0.987408	0.989807	0.0491728	0.0434683	0.191231	0.191828		453.8	0.515701	0.50708	0.0928302	0.0916298	0.0116978	0.00964414	0.00999933	0.00767242	0.0417345	0.0408367	0.0099753	0.00838374	0.24644	0.24409		453.8	-0.00154	0	-0.0099	0	-0.00247	0	-0.01071	0	-0.0106	0	-0.00618	0	-0.00236	0
[truncated: 2,930 more rows]
