# Supplementary material for: Design of amyloidogenic peptide traps
Source: Nat Chem Biol. 2024 Mar 19;20(8):981–90. doi: 10.1038/s41589-024-01578-5 (PMC11288891; doi:10.1038/s41589-024-01578-5)
Supplement: Supplementary file 9 — Statistical source data. [file 41589_2024_1578_MOESM9_ESM.xlsx]

## Sheet: Fig. 5b
BLI Data
Concentrations in Molar [M]
DAm12				DAm14				DAm15				2DT2				DTTR23				DSAA1_1
Time1	1E-05	2.5E-06	6.25E-07	Time1	1E-05	2.5E-06	6.25E-07	Time1	1E-05	2.5E-06	6.25E-07	Time1	1E-05	2.5E-06	6.25E-07	Time1	1E-05	2.5E-06	6.25E-07	Time1	1E-05	2.5E-06	6.25E-07
240	0.16889	0.0433405	0.00958449	310	0.0451464	0.0130616	-0.00127212	247.6	0.0116535	0.00565595	-0.00072859	240	0.0171263	0.0135616	0.00535558	240	0.0111853	0.00307697	-0.00156057	240	0.0361003	0.0140257	0.00894996
240.2	0.184774	0.0496925	0.0126495	310.2	0.0523979	0.0153436	-0.00101663	247.8	0.0146323	0.00693699	9.03e-06	240.2	0.0195421	0.0143671	0.00563602	240.2	0.0127656	0.00435906	-0.00108877	240.2	0.039702	0.014885	0.00914356
240.4	0.202662	0.0566206	0.0161087	310.4	0.0616073	0.018644	0.00017592	248	0.0178294	0.00797639	0.00033186	240.4	0.0221631	0.0149431	0.00560933	240.4	0.0145544	0.00544704	-0.00076652	240.4	0.0442916	0.01607	0.00977042
240.6	0.221254	0.0641642	0.0192854	310.6	0.0708833	0.021566	0.00079185	248.2	0.0210223	0.00885275	0.00072889	240.6	0.025713	0.0160793	0.00622269	240.6	0.0159586	0.00616603	-0.00066114	240.6	0.0492266	0.0174037	0.0104618
240.8	0.240936	0.0722519	0.0225614	310.8	0.0801191	0.0246093	0.0010504	248.4	0.0244549	0.0103637	0.00138647	240.8	0.0292702	0.0170064	0.00648377	240.8	0.0177741	0.0070247	-0.00023989	240.8	0.0546167	0.0189508	0.0112544
241	0.260786	0.0800403	0.0256095	311	0.0899857	0.0280608	0.00149678	248.6	0.027867	0.0113043	0.0016078	241	0.0333385	0.0187764	0.00706697	241	0.0201201	0.00835249	0.00020257	241	0.0603134	0.0206448	0.0118072
241.2	0.280096	0.0880106	0.0285556	311.2	0.100012	0.0316704	0.00288824	248.8	0.0320423	0.0124087	0.00222927	241.2	0.0371673	0.0202231	0.00708589	241.2	0.0221151	0.00895011	0.00012739	241.2	0.0662728	0.0218556	0.01237
241.4	0.298392	0.0953123	0.0313203	311.4	0.109515	0.0349629	0.00372302	249	0.0362978	0.0131073	0.00266906	241.4	0.0408562	0.0211578	0.00738746	241.4	0.0242034	0.00960287	0.00040128	241.4	0.0719142	0.0229867	0.0128048
241.6	0.31542	0.102195	0.0339139	311.6	0.118514	0.0382889	0.00473974	249.2	0.0403855	0.0138838	0.0029221	241.6	0.0448667	0.0226883	0.00763323	241.6	0.0267458	0.0105768	0.0009557	241.6	0.0778267	0.0244115	0.0135019
241.8	0.329957	0.107842	0.0359831	311.8	0.126262	0.0414095	0.00558695	249.4	0.0446105	0.015168	0.00296888	241.8	0.0490552	0.0241545	0.0077517	241.8	0.0289841	0.0112245	0.00144823	241.8	0.082981	0.0257335	0.013944
242	0.341418	0.112265	0.0375592	312	0.132406	0.0438966	0.00658788	249.6	0.0481727	0.0158389	0.00287064	242	0.0526416	0.0255617	0.00845943	242	0.0314957	0.0120688	0.00258829	242	0.0880618	0.0271492	0.014159
242.2	0.349375	0.115153	0.0384229	312.2	0.136839	0.0459205	0.00774709	249.8	0.0522157	0.016865	0.00316296	242.2	0.0562662	0.0269212	0.00908582	242.2	0.0331272	0.012334	0.00295393	242.2	0.0921766	0.0283814	0.0145682
242.4	0.35756	0.117836	0.0397019	312.4	0.141074	0.0484355	0.00893677	250	0.0561857	0.0178805	0.00344162	242.4	0.0595712	0.0285925	0.00979205	242.4	0.034048	0.0120612	0.00214016	242.4	0.0962854	0.0295001	0.0148723
242.6	0.365077	0.120147	0.0402102	312.6	0.145699	0.0507532	0.00982637	250.2	0.0593689	0.0180799	0.00341155	242.6	0.0625456	0.0293928	0.0102119	242.6	0.035733	0.0122038	0.00235364	242.6	0.0995481	0.0304899	0.0149399
242.8	0.37257	0.122658	0.0412676	312.8	0.149778	0.052715	0.010402	250.4	0.0626432	0.0187554	0.00370311	242.8	0.0652515	0.0306463	0.0103057	242.8	0.0367455	0.0126824	0.00226014	242.8	0.103243	0.0313375	0.0150476
243	0.380228	0.125489	0.0419003	313	0.153278	0.0539306	0.0108562	250.6	0.0661637	0.0196597	0.00407695	243	0.0682543	0.031746	0.0107275	243	0.0369371	0.0118856	0.00144215	243	0.106538	0.0325455	0.0148326
243.2	0.387924	0.12728	0.04288	313.2	0.15692	0.0557451	0.0116532	250.8	0.0694258	0.0204882	0.00449859	243.2	0.0707884	0.0324445	0.0106583	243.2	0.0382886	0.0123032	0.00143582	243.2	0.109666	0.0330594	0.014506
243.4	0.395363	0.129988	0.0440674	313.4	0.16006	0.056876	0.0122605	251	0.0730141	0.0214019	0.00495978	243.4	0.0736604	0.0336773	0.0113462	243.4	0.0390422	0.012583	0.001941	243.4	0.112878	0.033895	0.014946
243.6	0.401948	0.132547	0.0450034	313.6	0.162503	0.0579272	0.013024	251.2	0.0766212	0.0225787	0.00556719	243.6	0.0766402	0.0347857	0.0121383	243.6	0.0402929	0.0132063	0.00152534	243.6	0.11554	0.0343504	0.0151219
243.8	0.409053	0.134778	0.0463692	313.8	0.16526	0.0590018	0.0140156	251.4	0.0797419	0.0233311	0.0056343	243.8	0.0787132	0.0347566	0.0117367	243.8	0.0411467	0.0136247	0.00165987	243.8	0.117933	0.0349243	0.0151628
244	0.415269	0.137258	0.0470386	314	0.168044	0.0603295	0.0149049	251.6	0.08334	0.0249965	0.00636111	244	0.0815053	0.035153	0.0121479	244	0.042265	0.0141521	0.00229309	244	0.120843	0.0356052	0.0159036
244.2	0.421768	0.139306	0.0479887	314.2	0.169918	0.0611326	0.0149409	251.8	0.086923	0.0259399	0.00703993	244.2	0.0840064	0.0356467	0.0121792	244.2	0.0432259	0.0144391	0.00248619	244.2	0.123172	0.0362014	0.0159036
244.4	0.428003	0.141389	0.0487822	314.4	0.172538	0.062474	0.0159668	252	0.0901433	0.0266423	0.00708406	244.4	0.0864577	0.0360997	0.0121582	244.4	0.0438512	0.0139433	0.00196102	244.4	0.125881	0.0371474	0.0167331
244.6	0.433908	0.143992	0.0491983	314.6	0.173865	0.0627573	0.0156059	252.2	0.0926856	0.0271782	0.00733095	244.6	0.0896623	0.0372101	0.0126162	244.6	0.0442724	0.0135269	0.00197947	244.6	0.128209	0.0380896	0.0171128
244.8	0.440053	0.146675	0.0493813	314.8	0.175434	0.0637156	0.0157072	252.4	0.0958536	0.0282532	0.0078304	244.8	0.0925156	0.0380809	0.0128345	244.8	0.0454372	0.0137365	0.0021843	244.8	0.13063	0.0387761	0.0173423
245	0.446258	0.14888	0.0501715	315	0.177257	0.0648242	0.0162933	252.6	0.0988147	0.0288019	0.00785327	245	0.0954213	0.0392887	0.0125342	245	0.0465739	0.013698	0.00195399	245	0.133213	0.0392391	0.0174719
245.2	0.45194	0.151277	0.0506012	315.2	0.178998	0.0656571	0.0170405	252.8	0.102336	0.0294038	0.00794428	245.2	0.0977629	0.039497	0.0118792	245.2	0.0471841	0.013542	0.00170071	245.2	0.13576	0.0395244	0.0177704
245.4	0.457762	0.153842	0.0517108	315.4	0.180829	0.0664701	0.0169426	253	0.105224	0.0293978	0.00772575	245.4	0.100534	0.0403044	0.0121181	245.4	0.0487941	0.0138615	0.00229938	245.4	0.13753	0.0403412	0.0177148
245.6	0.463138	0.156034	0.0525417	315.6	0.182764	0.067565	0.0175175	253.2	0.107647	0.0298196	0.00731767	245.6	0.10364	0.0420464	0.0122447	245.6	0.0505223	0.0144967	0.00274572	245.6	0.140133	0.0415782	0.018043
245.8	0.467988	0.158111	0.0531005	315.8	0.183823	0.0682124	0.0176562	253.4	0.110428	0.0305019	0.0067283	245.8	0.106498	0.0432947	0.0124348	245.8	0.052247	0.0145588	0.00355871	245.8	0.142431	0.0426664	0.018515
246	0.472675	0.16014	0.0536799	316	0.185402	0.0692059	0.0185309	253.6	0.113411	0.0308752	0.00622828	246	0.109474	0.044827	0.0132716	246	0.0536891	0.0153992	0.00407063	246	0.14485	0.0436436	0.0187184
246.2	0.477551	0.161718	0.0543585	316.2	0.187415	0.070375	0.0187786	253.8	0.117054	0.0317084	0.00668711	246.2	0.112204	0.0458636	0.0135838	246.2	0.0543059	0.015254	0.00373701	246.2	0.146784	0.044704	0.0192035
246.4	0.481821	0.16346	0.0549118	316.4	0.189367	0.0714073	0.0188994	254	0.119512	0.0318501	0.00648977	246.4	0.114363	0.0463166	0.0137366	246.4	0.0552718	0.0156655	0.00332501	246.4	0.148386	0.0453798	0.0193707
246.6	0.486513	0.165132	0.0553156	316.6	0.191526	0.073022	0.019152	254.2	0.122162	0.0323926	0.00687383	246.6	0.117256	0.0473835	0.0143039	246.6	0.0563959	0.0165831	0.00377694	246.6	0.150301	0.0466916	0.0194499
246.8	0.491231	0.167297	0.0562326	316.8	0.19337	0.0734897	0.0191161	254.4	0.12497	0.0332834	0.00730143	246.8	0.119216	0.0482989	0.0141615	246.8	0.0571057	0.0168854	0.00347363	246.8	0.152141	0.0471288	0.0193813
247	0.495963	0.169722	0.0571575	317	0.195342	0.0743559	0.0194719	254.6	0.128302	0.0346189	0.00768801	247	0.121674	0.0490575	0.0145809	247	0.0584981	0.0169867	0.00380459	247	0.153678	0.0477724	0.019474
247.2	0.50051	0.170876	0.0581416	317.2	0.197232	0.0755919	0.0200349	254.8	0.131347	0.0356926	0.00846308	247.2	0.124578	0.0498009	0.015197	247.2	0.0597766	0.0182224	0.00416906	247.2	0.155542	0.048243	0.0197368
247.4	0.504801	0.172924	0.0586718	317.4	0.198946	0.0759429	0.0202312	255	0.134943	0.0372521	0.00919237	247.4	0.126791	0.051066	0.0155692	247.4	0.060292	0.0185598	0.004378	247.4	0.157026	0.048295	0.02004
247.6	0.508988	0.174939	0.0589257	317.6	0.200692	0.0771894	0.0205809	255.2	0.138201	0.0386717	0.0100279	247.6	0.128672	0.0510484	0.0152812	247.6	0.0618831	0.0193463	0.00465314	247.6	0.158514	0.0485583	0.0200587
247.8	0.513441	0.176355	0.0595549	317.8	0.202553	0.0782356	0.0207498	255.4	0.141541	0.039931	0.0108812	247.8	0.130578	0.0511239	0.0151233	247.8	0.0630214	0.0194292	0.00493849	247.8	0.159944	0.0493121	0.020225
248	0.517396	0.178416	0.0602221	318	0.204257	0.0789747	0.0214236	255.6	0.144656	0.0413477	0.0117164	248	0.133227	0.0517211	0.0156485	248	0.0634858	0.0192008	0.0052702	248	0.161521	0.0496057	0.0206098
248.2	0.521799	0.180407	0.0608998	318.2	0.205212	0.0797721	0.0214167	255.8	0.147791	0.0422259	0.0123742	248.2	0.135106	0.0526367	0.0160645	248.2	0.0642769	0.0195225	0.00526361	248.2	0.163089	0.0505673	0.0213209
248.4	0.525676	0.182214	0.0609483	318.4	0.206337	0.0804257	0.0218125	256	0.150814	0.0433322	0.01302	248.4	0.137525	0.0533041	0.0160879	248.4	0.0647324	0.0191422	0.00457979	248.4	0.164245	0.0513126	0.0215889
248.6	0.529555	0.18367	0.0610107	318.6	0.207249	0.0811435	0.0221891	256.2	0.153427	0.0441932	0.0132016	248.6	0.140205	0.0541019	0.0160243	248.6	0.0656547	0.0198336	0.00517208	248.6	0.165454	0.0515555	0.0213059
248.8	0.533427	0.185286	0.061343	318.8	0.208148	0.0819474	0.0224994	256.4	0.156747	0.0460445	0.0140006	248.8	0.142593	0.0551203	0.016128	248.8	0.0659407	0.020353	0.00482577	248.8	0.166845	0.0516638	0.0215891
249	0.537582	0.186936	0.0620597	319	0.208993	0.0824911	0.02287	256.6	0.15971	0.0470138	0.0139295	249	0.144523	0.0558681	0.0153849	249	0.0667683	0.0206518	0.00466548	249	0.167892	0.0519869	0.0215553
249.2	0.541558	0.189257	0.0624082	319.2	0.209569	0.0828905	0.0229197	256.8	0.16255	0.0472819	0.0137565	249.2	0.147206	0.0567658	0.0154748	249.2	0.0678601	0.0213438	0.00521752	249.2	0.168523	0.0522531	0.0213841
249.4	0.545386	0.190833	0.0631804	319.4	0.210358	0.0830797	0.0234916	257	0.164723	0.0475274	0.013903	249.4	0.149683	0.0581777	0.0159734	249.4	0.0693642	0.0219044	0.00560804	249.4	0.169102	0.052121	0.0207571
249.6	0.549119	0.192456	0.0633845	319.6	0.211209	0.083555	0.0241552	257.2	0.166857	0.0483405	0.0136516	249.6	0.151995	0.0594503	0.0163071	249.6	0.0705439	0.0225154	0.00592857	249.6	0.170352	0.052272	0.0203984
249.8	0.552935	0.19461	0.0640447	319.8	0.211674	0.0835874	0.0242582	257.4	0.16949	0.0489057	0.0129246	249.8	0.154729	0.0605704	0.0167495	249.8	0.0715377	0.0228961	0.00625977	249.8	0.171252	0.0525803	0.0204292
250	0.556493	0.195852	0.0647483	320	0.212512	0.0844709	0.02481	257.6	0.171764	0.0489806	0.0126579	250	0.157408	0.0614534	0.0172838	250	0.0720319	0.0231067	0.00560706	250	0.171972	0.0530371	0.0200685
250.2	0.56015	0.197333	0.0657593	320.2	0.213076	0.085254	0.0246641	257.8	0.173864	0.048827	0.0130642	250.2	0.159365	0.0620713	0.0175719	250.2	0.0725895	0.0226694	0.00545736	250.2	0.173119	0.0537071	0.020053
250.4	0.563291	0.198569	0.0666139	320.4	0.213979	0.0857019	0.025163	258	0.176011	0.0491079	0.0130898	250.4	0.161546	0.0630031	0.0180392	250.4	0.0730619	0.0224268	0.00508735	250.4	0.173389	0.0538577	0.0197379
250.6	0.566843	0.199731	0.067303	320.6	0.214908	0.0865068	0.0255796	258.2	0.178614	0.049648	0.0131431	250.6	0.164586	0.0648185	0.0189534	250.6	0.0737301	0.0227124	0.00569443	250.6	0.174422	0.0543345	0.0196089
250.8	0.569815	0.201572	0.0680981	320.8	0.216432	0.0873105	0.0260183	258.4	0.180681	0.0499138	0.0127916	250.8	0.16634	0.0658334	0.0190519	250.8	0.0748483	0.0224877	0.00551868	250.8	0.174753	0.0539649	0.0199575
251	0.572894	0.202967	0.0686532	321	0.217431	0.0883182	0.0264462	258.6	0.183189	0.0506048	0.0130887	251	0.168725	0.0668907	0.0195646	251	0.0753233	0.0223966	0.00543057	251	0.175566	0.0541548	0.0200628
251.2	0.576236	0.204144	0.0693245	321.2	0.218443	0.0889164	0.0265909	258.8	0.185699	0.0513032	0.0132173	251.2	0.171134	0.0678798	0.0197062	251.2	0.0754777	0.0221235	0.00522995	251.2	0.176649	0.0542243	0.0202883
251.4	0.579894	0.205686	0.0703715	321.4	0.219726	0.0896857	0.0267514	259	0.18849	0.0520492	0.0135937	251.4	0.172837	0.0689499	0.0193056	251.4	0.0752945	0.0213518	0.00490356	251.4	0.177655	0.0546525	0.0209207
251.6	0.582826	0.207237	0.0713011	321.6	0.220727	0.0905797	0.0268841	259.2	0.190567	0.0526194	0.0139722	251.6	0.174496	0.0688587	0.0190565	251.6	0.0760352	0.0213656	0.0046973	251.6	0.178829	0.0555913	0.0216378
251.8	0.585989	0.208951	0.0720142	321.8	0.221952	0.0912629	0.0270441	259.4	0.193318	0.0537065	0.0147316	251.8	0.177035	0.0703645	0.0195397	251.8	0.0762734	0.0209023	0.00402385	251.8	0.179885	0.0562376	0.0219159
252	0.588896	0.210811	0.0726585	322	0.222328	0.0917941	0.0270252	259.6	0.195843	0.0544487	0.0149968	252	0.179105	0.0713142	0.0193973	252	0.0764132	0.0210684	0.00371737	252	0.181311	0.056588	0.0225467
252.2	0.59194	0.212536	0.0731041	322.2	0.223119	0.092659	0.0273836	259.8	0.198468	0.0553007	0.0153551	252.2	0.181467	0.0725488	0.0198487	252.2	0.0762427	0.0208318	0.00284612	252.2	0.182603	0.0572926	0.0232609
252.4	0.594547	0.213963	0.0730362	322.4	0.223638	0.0935323	0.0276643	260	0.200544	0.0562086	0.0152398	252.4	0.183472	0.0726832	0.0195225	252.4	0.0763912	0.020851	0.0021181	252.4	0.182941	0.0574464	0.023124
252.6	0.596736	0.215067	0.0737194	322.6	0.224593	0.0943797	0.0288468	260.2	0.204064	0.0580174	0.0155361	252.6	0.185619	0.073254	0.0193137	252.6	0.076333	0.0216799	0.00215699	252.6	0.18389	0.0576832	0.0236645
252.8	0.599764	0.217312	0.0744993	322.8	0.224808	0.0949727	0.0286775	260.4	0.20699	0.0597969	0.0161617	252.8	0.187911	0.0741205	0.0194107	252.8	0.0765339	0.0214881	0.00178634	252.8	0.184661	0.0580401	0.0241473
253	0.602461	0.21901	0.0749413	323	0.225706	0.0955096	0.0292934	260.6	0.209861	0.0611807	0.0165067	253	0.189789	0.0746363	0.0198076	253	0.0777005	0.0216032	0.00214832	253	0.184904	0.0583213	0.023987
253.2	0.605715	0.220781	0.075679	323.2	0.226039	0.0953194	0.029177	260.8	0.21228	0.0621196	0.0166593	253.2	0.192255	0.0755041	0.0198186	253.2	0.0789269	0.022254	0.0026309	253.2	0.185347	0.0582817	0.0238302
253.4	0.60818	0.22181	0.0760171	323.4	0.226411	0.0952245	0.0294967	261	0.2142	0.0631687	0.0165558	253.4	0.194179	0.0765168	0.0205856	253.4	0.0803391	0.0233048	0.00328608	253.4	0.185464	0.0577788	0.023516
253.6	0.61102	0.223621	0.0762685	323.6	0.226947	0.0956627	0.0297922	261.2	0.216618	0.0641345	0.0166085	253.6	0.196131	0.0770765	0.0206628	253.6	0.0814061	0.0238051	0.00359356	253.6	0.18581	0.0585367	0.0234921
253.8	0.613247	0.224781	0.0765291	323.8	0.227024	0.0961772	0.0301016	261.4	0.219133	0.0647113	0.0167531	253.8	0.198481	0.0775127	0.0212043	253.8	0.0826542	0.0244935	0.00377192	253.8	0.185726	0.0588323	0.023516
254	0.615372	0.225705	0.0766956	324	0.227077	0.0968057	0.0300756	261.6	0.220939	0.064838	0.0165979	254	0.200209	0.0781659	0.021644	254	0.0845882	0.0245064	0.00412697	254	0.186183	0.0593755	0.023514
254.2	0.617559	0.226732	0.0770596	324.2	0.227602	0.0969631	0.0302944	261.8	0.222949	0.0650902	0.0171105	254.2	0.202165	0.0791981	0.0220916	254.2	0.085861	0.0248088	0.00440707	254.2	0.186639	0.059841	0.0236552
254.4	0.619932	0.227071	0.0772998	324.4	0.228452	0.0968599	0.030442	262	0.224911	0.0654912	0.0174656	254.4	0.203735	0.080182	0.0225858	254.4	0.0872519	0.0251771	0.00500328	254.4	0.186364	0.0595051	0.0232454
254.6	0.622547	0.228425	0.0778361	324.6	0.22904	0.0972856	0.0303656	262.2	0.226887	0.0654167	0.0168889	254.6	0.205449	0.0809066	0.0226182	254.6	0.0885143	0.0261615	0.00539934	254.6	0.187212	0.0601238	0.0238956
254.8	0.625147	0.229855	0.0785682	324.8	0.229752	0.0973644	0.0302827	262.4	0.228584	0.0653558	0.0166898	254.8	0.207059	0.0814062	0.022927	254.8	0.0898998	0.0267862	0.00545182	254.8	0.187599	0.0604524	0.0246683
255	0.627866	0.230731	0.0789843	325	0.230361	0.0971238	0.0299628	262.6	0.230362	0.0652421	0.0168599	255	0.2089	0.0825696	0.0230596	255	0.0913596	0.0272419	0.00642973	255	0.188324	0.0607201	0.0244401
255.2	0.630986	0.232262	0.0797639	325.2	0.231399	0.0965457	0.0295818	262.8	0.232117	0.0653506	0.0165403	255.2	0.210783	0.083703	0.0232484	255.2	0.0923547	0.0276972	0.0070674	255.2	0.188716	0.0612371	0.024326
255.4	0.634207	0.233354	0.0807553	325.4	0.232261	0.0970593	0.0295886	263	0.234153	0.0654402	0.0164626	255.4	0.212036	0.0841905	0.0232793	255.4	0.0929456	0.0279648	0.00740449	255.4	0.189348	0.0620668	0.0243421
255.6	0.6366	0.234537	0.080854	325.6	0.23316	0.0974262	0.0296563	263.2	0.235798	0.0659609	0.0165297	255.6	0.213456	0.0847496	0.0235278	255.6	0.0935063	0.0281967	0.00711199	255.6	0.190365	0.0620759	0.0243549
255.8	0.639543	0.23612	0.0810775	325.8	0.233924	0.0979041	0.0294496	263.4	0.238259	0.066243	0.0164473	255.8	0.215845	0.0863764	0.0236661	255.8	0.0946048	0.0282523	0.00701231	255.8	0.190822	0.0619854	0.0239642
256	0.642296	0.237102	0.0815992	326	0.234619	0.0986021	0.0299558	263.6	0.240192	0.0665513	0.0162487	256	0.217089	0.0870169	0.0230409	256	0.0948369	0.0281528	0.0068444	256	0.191324	0.0617039	0.0236177
256.2	0.645193	0.239072	0.0821084	326.2	0.235574	0.0992337	0.0309361	263.8	0.242239	0.0670568	0.0164772	256.2	0.218985	0.0873084	0.0236439	256.2	0.0947614	0.0272254	0.00638001	256.2	0.191767	0.0618443	0.0236177
256.4	0.64738	0.240047	0.0824949	326.4	0.23638	0.100307	0.0316664	264	0.24518	0.0680463	0.0167575	256.4	0.220525	0.0877367	0.0236942	256.4	0.0951066	0.0270778	0.00608976	256.4	0.192307	0.061907	0.0234656
256.6	0.649637	0.240651	0.0827373	326.6	0.237364	0.100894	0.0326239	264.2	0.247693	0.0687874	0.0170432	256.6	0.222325	0.0881356	0.0234564	256.6	0.0950953	0.0270919	0.00620917	256.6	0.192844	0.0622608	0.0237479
256.8	0.651812	0.242081	0.0831809	326.8	0.237858	0.101404	0.0327207	264.4	0.249482	0.0693861	0.0174445	256.8	0.224272	0.0888886	0.0236314	256.8	0.0957848	0.0267637	0.00599885	256.8	0.193718	0.062756	0.0236898
257	0.653669	0.242885	0.0836339	327	0.239189	0.101917	0.0333641	264.6	0.252015	0.0703314	0.0180299	257	0.225733	0.089422	0.0238979	257	0.0959374	0.0268914	0.00587399	257	0.193627	0.0627643	0.0236277
257.2	0.656258	0.244223	0.0840383	327.2	0.239478	0.102002	0.0334229	264.8	0.254005	0.0704265	0.0177599	257.2	0.227475	0.0901077	0.0242545	257.2	0.0964021	0.027789	0.00556672	257.2	0.193696	0.0626298	0.0235852
257.4	0.658124	0.245469	0.0842679	327.4	0.23961	0.102765	0.034154	265	0.256195	0.0711505	0.0180875	257.4	0.229314	0.0908855	0.0250103	257.4	0.0972266	0.028335	0.00593067	257.4	0.194	0.0627878	0.0241663
257.6	0.660387	0.246917	0.0846325	327.6	0.240419	0.103857	0.0351289	265.2	0.258716	0.0718595	0.0187026	257.6	0.230747	0.0913434	0.0250871	257.6	0.0976561	0.0286193	0.00482705	257.6	0.194488	0.0633183	0.0239113
257.8	0.662202	0.24827	0.0850354	327.8	0.240555	0.104743	0.035414	265.4	0.260869	0.0724195	0.0190231	257.8	0.232981	0.0922997	0.0260211	257.8	0.0987382	0.0287928	0.0044282	257.8	0.194254	0.0630079	0.0235137
258	0.663811	0.249029	0.0852691	328	0.240748	0.105179	0.0352129	265.6	0.262857	0.0731455	0.0193784	258	0.234724	0.0929614	0.0261879	258	0.0997331	0.0288064	0.00393864	258	0.194979	0.0635571	0.0241663
258.2	0.666267	0.250053	0.086081	328.2	0.241315	0.106029	0.0356941	265.8	0.264723	0.0737086	0.0206024	258.2	0.236778	0.0936306	0.0268265	258.2	0.100362	0.0298201	0.00374879	258.2	0.195235	0.064389	0.0247048
258.4	0.668322	0.251128	0.0866579	328.4	0.241488	0.105969	0.0349467	266	0.266897	0.0743061	0.0212902	258.4	0.238136	0.0939926	0.027072	258.4	0.101372	0.0305938	0.00404046	258.4	0.195621	0.064029	0.0247936
258.6	0.670218	0.252547	0.0870311	328.6	0.241785	0.106189	0.0343101	266.2	0.269114	0.074618	0.0208596	258.6	0.239932	0.0949273	0.0275412	258.6	0.101693	0.0308657	0.00343838	258.6	0.196385	0.0643121	0.0256099
258.8	0.672214	0.2538	0.0877374	328.8	0.241975	0.105593	0.0338441	266.4	0.271333	0.0748438	0.0214041	258.8	0.242238	0.0958644	0.0287202	258.8	0.10236	0.031293	0.003785	258.8	0.196873	0.0640413	0.0257785
259	0.674197	0.255885	0.0879054	329	0.24247	0.105463	0.0332575	266.6	0.273546	0.0755103	0.0220013	259	0.243765	0.0963811	0.0288387	259	0.103421	0.0316513	0.00438105	259	0.196831	0.0632887	0.0253641
259.2	0.676941	0.257765	0.0884867	329.2	0.242613	0.104876	0.0330064	266.8	0.275536	0.0764061	0.0220041	259.2	0.245369	0.0972622	0.0294443	259.2	0.103679	0.0315669	0.00413168	259.2	0.196834	0.0631704	0.0252274
259.4	0.679476	0.259184	0.0895455	329.4	0.243201	0.105253	0.0327611	267	0.278035	0.0770866	0.022329	259.4	0.246928	0.0975942	0.0293937	259.4	0.104217	0.0312002	0.0043848	259.4	0.197166	0.0634857	0.0253647
259.6	0.681215	0.260308	0.0899098	329.6	0.243786	0.105565	0.03287	267.2	0.280229	0.0781351	0.0230326	259.6	0.248839	0.098633	0.0296947	259.6	0.104641	0.0310432	0.00450175	259.6	0.197915	0.062864	0.0255704
259.8	0.683744	0.261578	0.0906597	329.8	0.243654	0.105473	0.0324104	267.4	0.282792	0.0789355	0.0231553	259.8	0.250838	0.0996665	0.02933	259.8	0.106017	0.0317567	0.0057644	259.8	0.197656	0.0627461	0.0252321
260	0.685979	0.262576	0.0913102	330	0.243834	0.105676	0.0329236	267.6	0.285087	0.0802327	0.0239232	260	0.252161	0.100042	0.0290305	260	0.106329	0.0316063	0.00591927	260	0.197828	0.062731	0.024918
260.2	0.68798	0.263776	0.0915185	330.2	0.244011	0.105886	0.0330884	267.8	0.287595	0.0814	0.0242914	260.2	0.253762	0.100293	0.0290952	260.2	0.106905	0.0321322	0.00672605	260.2	0.198218	0.0632024	0.0246863
260.4	0.689565	0.264174	0.0919973	330.4	0.244207	0.106501	0.0333659	268	0.289696	0.0820435	0.0244358	260.4	0.255379	0.101219	0.0289332	260.4	0.107765	0.0326371	0.00727954	260.4	0.199033	0.0634624	0.0247323
260.6	0.691145	0.265169	0.0920192	330.6	0.24435	0.106272	0.0333941	268.2	0.29131	0.0819845	0.0238738	260.6	0.256418	0.101304	0.0284454	260.6	0.108935	0.0330336	0.00784141	260.6	0.198887	0.0636629	0.0245479
260.8	0.692267	0.266324	0.092501	330.8	0.244724	0.106453	0.0336164	268.4	0.293392	0.0827716	0.0242373	260.8	0.258344	0.102248	0.0286775	260.8	0.109895	0.0335017	0.00822089	260.8	0.199143	0.0638323	0.0242329
261	0.693662	0.267024	0.0922175	331	0.24531	0.10693	0.0336265	268.6	0.295479	0.0834587	0.0240073	261	0.259869	0.102919	0.0290396	261	0.110852	0.0341298	0.00834189	261	0.198398	0.063183	0.0238705
261.2	0.695477	0.267799	0.0919277	331.2	0.246236	0.107134	0.0337075	268.8	0.297334	0.0839763	0.0239315	261.2	0.261595	0.104055	0.0296254	261.2	0.111806	0.0343139	0.00826515	261.2	0.199061	0.0635297	0.0241069
261.4	0.697009	0.269147	0.0922331	331.4	0.246865	0.107581	0.0340594	269	0.299301	0.0845951	0.0241737	261.4	0.263359	0.104883	0.0292808	261.4	0.113392	0.03411	0.00818416	261.4	0.199628	0.0636021	0.0243156
261.6	0.698856	0.270196	0.0926824	331.6	0.247806	0.108214	0.0340342	269.2	0.3005	0.0851555	0.0242481	261.6	0.264909	0.105367	0.0294839	261.6	0.114126	0.0340698	0.00725434	261.6	0.198897	0.0631907	0.0234297
261.8	0.700898	0.270713	0.0930804	331.8	0.247861	0.108849	0.033946	269.4	0.302071	0.0859103	0.0246209	261.8	0.266902	0.10638	0.0299168	261.8	0.115075	0.0341477	0.00714492	261.8	0.198426	0.0632807	0.0232939
262	0.702546	0.270907	0.0930695	332	0.248557	0.109425	0.0339956	269.6	0.303704	0.0865983	0.0252107	262	0.268083	0.10712	0.0302827	262	0.115791	0.0345003	0.00673085	262	0.19888	0.063752	0.0237394
262.2	0.705168	0.27223	0.0938187	332.2	0.248999	0.109824	0.0341596	269.8	0.305013	0.0870782	0.0257437	262.2	0.269601	0.108153	0.0307378	262.2	0.116441	0.0348419	0.00692018	262.2	0.199077	0.0640851	0.0239893
262.4	0.706879	0.273282	0.0942024	332.4	0.249303	0.109628	0.033592	270	0.306419	0.0874307	0.0254036	262.4	0.27056	0.108266	0.0307218	262.4	0.117305	0.0345624	0.00644153	262.4	0.199489	0.063989	0.0237557
262.6	0.709211	0.274926	0.0947631	332.6	0.25001	0.109642	0.0336098	270.2	0.307327	0.0875623	0.0249592	262.6	0.271771	0.109308	0.0312063	262.6	0.117538	0.0338839	0.00563537	262.6	0.199833	0.0641635	0.0239218
262.8	0.711135	0.276318	0.0953962	332.8	0.250296	0.109551	0.0337796	270.4	0.30899	0.0876447	0.0253086	262.8	0.273408	0.110308	0.0311327	262.8	0.118416	0.0337415	0.00583026	262.8	0.200017	0.0636795	0.0239632
263	0.713539	0.27764	0.0955449	333	0.250999	0.110272	0.0345257	270.6	0.31076	0.0887658	0.0257127	263	0.274674	0.110957	0.0309886	263	0.119414	0.0339964	0.00625697	263	0.20004	0.0637859	0.0241497
263.2	0.716106	0.278446	0.0959335	333.2	0.251557	0.110121	0.0349239	270.8	0.312695	0.089711	0.0258561	263.2	0.275928	0.111906	0.0308339	263.2	0.119913	0.0338476	0.00622453	263.2	0.200385	0.0644216	0.0242773
263.4	0.718041	0.279519	0.0967166	333.4	0.25231	0.11033	0.0352621	271	0.315066	0.0907277	0.0264751	263.4	0.27773	0.112373	0.0309329	263.4	0.120263	0.0340465	0.00651987	263.4	0.200972	0.0653296	0.0250405
263.6	0.720288	0.27993	0.0973948	333.6	0.252323	0.110544	0.0355949	271.2	0.316761	0.0917092	0.0264043	263.6	0.279471	0.113112	0.0316496	263.6	0.120688	0.0345363	0.00704936	263.6	0.201738	0.0654307	0.0254061
263.8	0.722571	0.280811	0.0980717	333.8	0.251959	0.110317	0.0353696	271.4	0.318908	0.092709	0.0264426	263.8	0.281168	0.113769	0.0316146	263.8	0.12134	0.0353617	0.00763332	263.8	0.201981	0.066152	0.0254374
264	0.724214	0.281472	0.0985383	334	0.252546	0.111104	0.0359095	271.6	0.320887	0.0938038	0.0269036	264	0.282466	0.11397	0.0314449	264	0.121701	0.0356377	0.00801315	264	0.202643	0.0665886	0.0255329
264.2	0.725757	0.282459	0.0987127	334.2	0.25289	0.111278	0.0357596	271.8	0.322712	0.0944997	0.0265308	264.2	0.284494	0.114626	0.0317604	264.2	0.122257	0.0362435	0.00861456	264.2	0.203262	0.0667388	0.0258498
264.4	0.726939	0.283265	0.0991095	334.4	0.252933	0.111538	0.0353291	272	0.324357	0.094559	0.0266002	264.4	0.285652	0.115249	0.0319093	264.4	0.123582	0.0365879	0.00878852	264.4	0.20387	0.0671879	0.0268491
264.6	0.728116	0.284339	0.0990558	334.6	0.253458	0.1118	0.0351156	272.2	0.326306	0.0948845	0.0264213	264.6	0.287067	0.115735	0.0319703	264.6	0.124358	0.036706	0.009029	264.6	0.203816	0.0672774	0.0271328
264.8	0.728824	0.284992	0.0994972	334.8	0.253627	0.112063	0.0348811	272.4	0.328437	0.0953699	0.0266143	264.8	0.288844	0.11624	0.0319736	264.8	0.125053	0.0372371	0.00912163	264.8	0.203868	0.0668781	0.027399
265	0.729924	0.285811	0.0994114	335	0.254349	0.112508	0.0346938	272.6	0.330713	0.0957281	0.0267793	265	0.290268	0.116441	0.0325919	265	0.125573	0.0380254	0.00932169	265	0.203946	0.0665521	0.0276115
265.2	0.731404	0.286637	0.0999195	335.2	0.255624	0.112931	0.034916	272.8	0.331893	0.0956378	0.0267987	265.2	0.291846	0.117006	0.0322749	265.2	0.125957	0.0380607	0.0090504	265.2	0.204355	0.0668611	0.0276325
265.4	0.732472	0.28779	0.100566	335.4	0.255904	0.112935	0.0347242	273	0.333214	0.0957483	0.0265375	265.4	0.292773	0.117115	0.0323854	265.4	0.126415	0.038281	0.00930174	265.4	0.204104	0.0666518	0.0273831
265.6	0.734458	0.28877	0.101668	335.6	0.256283	0.113292	0.0344211	273.2	0.334484	0.096116	0.0265121	265.6	0.29381	0.117604	0.0327448	265.6	0.125929	0.0385945	0.00898443	265.6	0.203742	0.0668887	0.0270784
265.8	0.73616	0.289433	0.101983	335.8	0.25672	0.113683	0.0346062	273.4	0.336165	0.0964424	0.0266108	265.8	0.29465	0.118237	0.0330677	265.8	0.126062	0.038428	0.00867279	265.8	0.203943	0.0670835	0.0269311
266	0.737301	0.290299	0.102205	336	0.257268	0.114208	0.0345431	273.6	0.337094	0.0962923	0.0264202	266	0.295501	0.11908	0.0334066	266	0.126214	0.0384065	0.00836878	266	0.20464	0.0669599	0.0270322
266.2	0.739262	0.29174	0.102877	336.2	0.257792	0.114453	0.0348786	273.8	0.338359	0.096478	0.0262454	266.2	0.296353	0.11917	0.0330903	266.2	0.126732	0.0386947	0.00823866	266.2	0.204654	0.0675029	0.0270335
266.4	0.740766	0.292853	0.103486	336.4	0.258588	0.115231	0.0352557	274	0.33926	0.0963085	0.0253293	266.4	0.297711	0.119417	0.0333543	266.4	0.127638	0.0386393	0.00822634	266.4	0.205131	0.0681333	0.0269408
266.6	0.742314	0.294114	0.103748	336.6	0.259125	0.115199	0.0355886	274.2	0.340956	0.096737	0.0256584	266.6	0.298596	0.120421	0.033341	266.6	0.128182	0.0380694	0.00827914	266.6	0.204959	0.0676287	0.0269584
266.8	0.74349	0.294869	0.103602	336.8	0.259681	0.115894	0.0367828	274.4	0.343363	0.0973311	0.0261206	266.8	0.29995	0.121077	0.0329956	266.8	0.12909	0.0379695	0.00811068	266.8	0.205325	0.067424	0.0269104
267	0.745616	0.296089	0.104013	337	0.260323	0.116129	0.0379099	274.6	0.34552	0.0980954	0.0264362	267	0.301432	0.122202	0.0335227	267	0.129971	0.0382733	0.00816206	267	0.205379	0.0680846	0.0263886
267.2	0.747568	0.297445	0.104375	337.2	0.260081	0.115718	0.0381089	274.8	0.347729	0.0988361	0.0268606	267.2	0.302939	0.122934	0.033939	267.2	0.13034	0.0382707	0.00763454	267.2	0.20579	0.0683895	0.0258804
267.4	0.749653	0.298436	0.105018	337.4	0.260137	0.115776	0.0387467	275	0.348553	0.0991578	0.026796	267.4	0.304595	0.123915	0.0343899	267.4	0.130761	0.0383309	0.00746677	267.4	0.206012	0.0684382	0.0260383
267.6	0.751692	0.299161	0.105171	337.6	0.260146	0.115427	0.0384491	275.2	0.350036	0.099152	0.0270511	267.6	0.306345	0.124862	0.0350508	267.6	0.13176	0.0387611	0.00788898	267.6	0.206515	0.0686946	0.0254301
267.8	0.753311	0.300023	0.105409	337.8	0.260399	0.115084	0.0389725	275.4	0.351789	0.0995036	0.027453	267.8	0.308064	0.125532	0.0348274	267.8	0.132534	0.0386714	0.00802088	267.8	0.206435	0.0684782	0.0253444
268	0.754877	0.300782	0.105268	338	0.260844	0.115244	0.0389848	275.6	0.353399	0.100216	0.0280998	268	0.309584	0.126268	0.0347431	268	0.133884	0.0388913	0.00840008	268	0.206487	0.0684686	0.0254281
268.2	0.756359	0.301819	0.105363	338.2	0.260923	0.115035	0.038815	275.8	0.354883	0.10062	0.0281923	268.2	0.311387	0.127017	0.0351404	268.2	0.134419	0.0387089	0.00809291	268.2	0.206843	0.0685866	0.0260765
268.4	0.757541	0.302053	0.10524	338.4	0.260874	0.1155	0.0386387	276	0.356422	0.100744	0.028391	268.4	0.312182	0.12724	0.0349456	268.4	0.135684	0.0390743	0.00797372	268.4	0.206886	0.0689913	0.026459
268.6	0.758883	0.303111	0.105624	338.6	0.261146	0.115518	0.0386197	276.2	0.357902	0.101019	0.0287549	268.6	0.313961	0.127468	0.034993	268.6	0.137193	0.0397575	0.00864739	268.6	0.20679	0.0689397	0.0262773
268.8	0.759864	0.303343	0.106424	338.8	0.261208	0.115571	0.038487	276.4	0.359723	0.101043	0.0286806	268.8	0.315078	0.127745	0.034939	268.8	0.137984	0.0406105	0.00865231	268.8	0.206514	0.0683104	0.0259545
269	0.761346	0.303838	0.106413	339	0.261736	0.115806	0.0386881	276.6	0.360948	0.101395	0.0290528	269	0.316166	0.128003	0.0352827	269	0.138922	0.0416901	0.00953544	269	0.206737	0.0685259	0.0260442
269.2	0.762127	0.304028	0.106281	339.2	0.262464	0.116169	0.0390707	276.8	0.361599	0.101473	0.0288412	269.2	0.316838	0.128205	0.0348524	269.2	0.13992	0.0422414	0.0103388	269.2	0.206753	0.0688716	0.0261151
269.4	0.763203	0.304412	0.106485	339.4	0.262846	0.116077	0.0389148	277	0.363465	0.102297	0.0288463	269.4	0.317727	0.128211	0.0354088	269.4	0.140405	0.0430341	0.0112745	269.4	0.206762	0.0689406	0.0264407
269.6	0.764759	0.305408	0.107235	339.6	0.263187	0.116815	0.0393362	277.2	0.364665	0.103294	0.0288224	269.6	0.318696	0.128378	0.0356383	269.6	0.140516	0.0438725	0.0115006	269.6	0.206554	0.0692994	0.0269113
269.8	0.765689	0.30577	0.107106	339.8	0.263339	0.117002	0.0390542	277.4	0.365943	0.103731	0.028545	269.8	0.319566	0.128264	0.0357001	269.8	0.140759	0.0439112	0.0116257	269.8	0.206493	0.0691466	0.0270884
270	0.767162	0.306715	0.107694	340	0.263261	0.117392	0.038893	277.6	0.367094	0.104486	0.0282862	270	0.320792	0.12933	0.036193	270	0.141272	0.0444233	0.0115401	270	0.206906	0.0692081	0.0272843
270.2	0.768373	0.308016	0.107907	340.2	0.263688	0.117896	0.0391104	277.8	0.369265	0.105612	0.0285163	270.2	0.321673	0.129103	0.0362106	270.2	0.141705	0.0443737	0.0111287	270.2	0.206933	0.06938	0.0276929
270.4	0.769512	0.308768	0.108579	340.4	0.264117	0.118788	0.0394517	278	0.371168	0.10687	0.0290706	270.4	0.322936	0.1298	0.0364392	270.4	0.142061	0.0441272	0.0111242	270.4	0.20712	0.0692431	0.0279399
270.6	0.771036	0.309626	0.108469	340.6	0.264505	0.118334	0.0395334	278.2	0.373347	0.108131	0.0292999	270.6	0.323479	0.130199	0.0363006	270.6	0.142196	0.0438821	0.0109846	270.6	0.206609	0.0687235	0.0276198
270.8	0.772551	0.310776	0.108983	340.8	0.264696	0.118429	0.0398695	278.4	0.37476	0.108354	0.0295978	270.8	0.324505	0.130847	0.0364101	270.8	0.142629	0.0435754	0.0102489	270.8	0.207217	0.0691565	0.0274681
271	0.774281	0.311683	0.109459	341	0.264492	0.118321	0.0399021	278.6	0.376707	0.108984	0.0300212	271	0.326234	0.132666	0.0370899	271	0.142752	0.0431174	0.00978992	271	0.207241	0.0697152	0.0269809
271.2	0.775917	0.312688	0.109696	341.2	0.264351	0.118552	0.0400283	278.8	0.378492	0.10986	0.0305432	271.2	0.327414	0.133239	0.0374457	271.2	0.142879	0.0429886	0.00961829	271.2	0.207521	0.0691996	0.0268887
271.4	0.777321	0.312995	0.109617	341.4	0.264554	0.118337	0.0397179	279	0.379502	0.110269	0.0305484	271.4	0.328481	0.134256	0.0374019	271.4	0.142699	0.0422668	0.00896855	271.4	0.207168	0.0693259	0.0269335
271.6	0.778932	0.314186	0.109721	341.6	0.264728	0.118404	0.0390811	279.2	0.381392	0.110921	0.0310033	271.6	0.329862	0.135037	0.0376752	271.6	0.142832	0.0415881	0.00845866	271.6	0.207357	0.069435	0.0268563
271.8	0.78033	0.314384	0.110351	341.8	0.264773	0.118724	0.0397528	279.4	0.382536	0.111028	0.0307308	271.8	0.331547	0.136344	0.0376635	271.8	0.143045	0.0407043	0.00799498	271.8	0.207471	0.0691303	0.0271882
272	0.78161	0.315364	0.110246	342	0.265457	0.119176	0.0396306	279.6	0.383794	0.111431	0.0305945	272	0.332309	0.13716	0.037338	272	0.14351	0.0405029	0.00756809	272	0.207615	0.0694567	0.0272747
272.2	0.782491	0.315519	0.11031	342.2	0.265602	0.119244	0.0395289	279.8	0.385413	0.111547	0.0308242	272.2	0.333301	0.137584	0.0376682	272.2	0.143213	0.0397691	0.00677223	272.2	0.207189	0.0689679	0.0269483
272.4	0.783567	0.316063	0.110673	342.4	0.265823	0.119361	0.0397637	280	0.386905	0.111502	0.0310228	272.4	0.334929	0.138156	0.0379444	272.4	0.144182	0.0398594	0.00683591	272.4	0.206944	0.0688733	0.0262073
272.6	0.784924	0.316994	0.111351	342.6	0.266262	0.119327	0.0396906	280.2	0.387836	0.111229	0.0313528	272.6	0.336242	0.138942	0.0381141	272.6	0.145007	0.0401575	0.00718747	272.6	0.20701	0.0688404	0.0262832
272.8	0.786157	0.317475	0.112143	342.8	0.266855	0.119685	0.040063	280.4	0.389438	0.1114	0.031316	272.8	0.337647	0.139362	0.0384259	272.8	0.145537	0.0403474	0.00689167	272.8	0.207559	0.0691035	0.0265811
273	0.787536	0.317865	0.111905	343	0.267629	0.119892	0.0406313	280.6	0.390446	0.111568	0.0316085	273	0.339213	0.13997	0.0391223	273	0.146684	0.0408169	0.00739093	273	0.208021	0.0697817	0.0271897
273.2	0.788416	0.318368	0.112104	343.2	0.268665	0.120474	0.0413104	280.8	0.391571	0.111847	0.0313463	273.2	0.339952	0.140025	0.0394295	273.2	0.147645	0.0412931	0.00784145	273.2	0.208061	0.0699745	0.0272895
273.4	0.790212	0.319265	0.112806	343.4	0.269371	0.120457	0.0416484	281	0.392673	0.11212	0.0310026	273.4	0.34161	0.140634	0.039975	273.4	0.148466	0.0425854	0.0080041	273.4	0.20812	0.0702807	0.0275846
273.6	0.791968	0.320748	0.113452	343.6	0.269697	0.12068	0.0413947	281.2	0.394043	0.11256	0.0306207	273.6	0.343156	0.14162	0.0406031	273.6	0.14921	0.0433516	0.00824904	273.6	0.207951	0.070337	0.0278711
273.8	0.793577	0.321074	0.113409	343.8	0.269301	0.120832	0.0408469	281.4	0.395568	0.112746	0.0306568	273.8	0.344602	0.142046	0.0409571	273.8	0.149616	0.0429747	0.00797761	273.8	0.208135	0.0704214	0.0275317
274	0.794886	0.321815	0.113784	344	0.269758	0.121526	0.0411082	281.6	0.397138	0.113862	0.0312141	274	0.345926	0.143032	0.0413392	274	0.15062	0.0435244	0.00777823	274	0.207982	0.0697517	0.0269158
274.2	0.795458	0.322408	0.1137	344.2	0.270705	0.122257	0.0417792	281.8	0.39913	0.11467	0.031691	274.2	0.347427	0.143046	0.0414856	274.2	0.151556	0.0437811	0.00762633	274.2	0.207997	0.069714	0.0272049
274.4	0.797606	0.323333	0.114312	344.4	0.271716	0.12241	0.0417255	282	0.400219	0.114787	0.0316087	274.4	0.348665	0.143779	0.0414494	274.4	0.152591	0.0444883	0.0080368	274.4	0.208054	0.0692557	0.0269809
274.6	0.798659	0.323894	0.114079	344.6	0.272299	0.122236	0.042153	282.2	0.401564	0.115096	0.0316642	274.6	0.350026	0.144299	0.0415482	274.6	0.153155	0.0443502	0.00810473	274.6	0.208643	0.0692806	0.0270531
274.8	0.799325	0.324357	0.114317	344.8	0.272598	0.122358	0.0421389	282.4	0.402712	0.115172	0.0319222	274.8	0.350833	0.144689	0.0413931	274.8	0.154049	0.0442739	0.00823321	274.8	0.209055	0.0695	0.0271524
275	0.800058	0.324674	0.114402	345	0.273204	0.123243	0.042728	282.6	0.404679	0.115833	0.0319451	275	0.352196	0.145312	0.0416545	275	0.154584	0.0440238	0.00826235	275	0.208553	0.0692064	0.0272631
275.2	0.801136	0.32548	0.114762	345.2	0.273826	0.12364	0.0427816	282.8	0.405467	0.116319	0.0315124	275.2	0.353	0.145393	0.0414064	275.2	0.155649	0.0447736	0.00902329	275.2	0.208195	0.0685494	0.0269244
275.4	0.802151	0.325531	0.115037	345.4	0.274181	0.124275	0.0425654	283	0.406478	0.117062	0.0312721	275.4	0.353996	0.145517	0.041099	275.4	0.156239	0.0448029	0.00878885	275.4	0.208601	0.0689064	0.0276217
275.6	0.803318	0.326221	0.115302	345.6	0.274666	0.125133	0.0428852	283.2	0.407574	0.117431	0.0311922	275.6	0.354877	0.146066	0.0405235	275.6	0.156959	0.045279	0.00921636	275.6	0.209178	0.0688688	0.0279975
275.8	0.804504	0.326557	0.115793	345.8	0.275347	0.125679	0.0434638	283.4	0.40882	0.117474	0.0312095	275.8	0.355959	0.14681	0.0406035	275.8	0.158019	0.0460588	0.0101341	275.8	0.209621	0.0686673	0.0282703
276	0.805529	0.327425	0.116094	346	0.275875	0.125733	0.0435508	283.6	0.410332	0.11818	0.031452	276	0.356062	0.146799	0.0399759	276	0.158111	0.0461086	0.0103513	276	0.209412	0.0683334	0.0281468
276.2	0.806798	0.32776	0.116805	346.2	0.275769	0.125744	0.0436597	283.8	0.411689	0.11878	0.0319864	276.2	0.356968	0.147215	0.0399757	276.2	0.158491	0.0461479	0.010694	276.2	0.208889	0.0681091	0.0277242
276.4	0.808328	0.329042	0.117542	346.4	0.275547	0.125534	0.0434491	284	0.412229	0.118932	0.0319312	276.4	0.358798	0.148245	0.0407425	276.4	0.159326	0.0461658	0.0114173	276.4	0.209045	0.0682662	0.0278206
276.6	0.809261	0.329248	0.11762	346.6	0.275612	0.12544	0.0427625	284.2	0.41324	0.119613	0.0323234	276.6	0.359555	0.149031	0.0411638	276.6	0.159778	0.0459051	0.0116465	276.6	0.209454	0.0688771	0.0282063
276.8	0.810628	0.330256	0.118179	346.8	0.276241	0.126002	0.0432897	284.4	0.414984	0.12024	0.0326022	276.8	0.360988	0.1494	0.0412165	276.8	0.160644	0.046505	0.0112672	276.8	0.20918	0.0692581	0.0278546
277	0.812504	0.331413	0.118366	347	0.276268	0.125938	0.0431556	284.6	0.41667	0.121438	0.0332383	277	0.36209	0.150483	0.0421564	277	0.161465	0.0465563	0.0114249	277	0.208804	0.0691243	0.0278295
277.2	0.814102	0.331996	0.118408	347.2	0.276311	0.12565	0.0429917	284.8	0.418011	0.121757	0.0331856	277.2	0.362441	0.151439	0.0425781	277.2	0.162173	0.047095	0.0116328	277.2	0.208428	0.0691869	0.0274794
277.4	0.815793	0.333117	0.119075	347.4	0.276284	0.125578	0.0429509	285	0.419491	0.122057	0.0337306	277.4	0.364009	0.152318	0.0432661	277.4	0.162564	0.0478029	0.0117019	277.4	0.208349	0.0698141	0.0276355
277.6	0.816805	0.33362	0.118989	347.6	0.27646	0.125542	0.0430672	285.2	0.421423	0.122443	0.0342321	277.6	0.365435	0.153912	0.0438813	277.6	0.162572	0.0477659	0.0114573	277.6	0.207698	0.0694302	0.0269753
277.8	0.817856	0.333986	0.118822	347.8	0.275895	0.125585	0.0432956	285.4	0.422612	0.123296	0.0344735	277.8	0.366542	0.154736	0.044428	277.8	0.16264	0.047502	0.0112687	277.8	0.207377	0.0692536	0.0263841
278	0.818539	0.33485	0.11904	348	0.276497	0.125519	0.0434202	285.6	0.423851	0.124178	0.0352307	278	0.367206	0.155656	0.044669	278	0.163211	0.0474786	0.011006	278	0.207114	0.0684343	0.0259949
278.2	0.819805	0.335694	0.118981	348.2	0.277014	0.125273	0.0438302	285.8	0.425321	0.124446	0.0354669	278.2	0.368157	0.155972	0.0449968	278.2	0.164235	0.0473401	0.0106752	278.2	0.207632	0.0686816	0.0262604
278.4	0.821803	0.33685	0.119404	348.4	0.277338	0.124867	0.0434483	286	0.42668	0.124716	0.0360507	278.4	0.368724	0.156379	0.0449901	278.4	0.164946	0.0476223	0.0108294	278.4	0.207635	0.0680636	0.025978
278.6	0.822078	0.336772	0.119425	348.6	0.27755	0.124973	0.0442776	286.2	0.428064	0.125409	0.0364408	278.6	0.369826	0.157266	0.045494	278.6	0.165414	0.0474406	0.0106375	278.6	0.207824	0.0681633	0.0257362
278.8	0.822793	0.337051	0.119469	348.8	0.277308	0.124305	0.043973	286.4	0.429423	0.125735	0.0362589	278.8	0.370615	0.157593	0.0456814	278.8	0.16603	0.0473144	0.0109684	278.8	0.207089	0.0679288	0.0258671
279	0.823756	0.337807	0.119897	349	0.277681	0.124936	0.044905	286.6	0.430748	0.125886	0.0358862	279	0.372091	0.158029	0.0461052	279	0.166764	0.0472049	0.0110535	279	0.206869	0.067281	0.0261862
279.2	0.825357	0.338654	0.120228	349.2	0.277662	0.124554	0.0447031	286.8	0.43132	0.126257	0.0358551	279.2	0.373106	0.157793	0.0454866	279.2	0.168053	0.0480307	0.0116808	279.2	0.207249	0.0676463	0.0261618
279.4	0.826475	0.338776	0.120414	349.4	0.277822	0.124807	0.0446244	287	0.433155	0.1268	0.0362351	279.4	0.374048	0.158226	0.0458118	279.4	0.169224	0.0485499	0.0117377	279.4	0.208382	0.0677813	0.026992
279.6	0.828099	0.339564	0.120718	349.6	0.277833	0.12482	0.0444814	287.2	0.434585	0.126942	0.0361322	279.6	0.374774	0.158619	0.0452311	279.6	0.169777	0.049147	0.0123051	279.6	0.20855	0.0681397	0.0270995
279.8	0.829885	0.340797	0.12188	349.8	0.278056	0.125196	0.0444016	287.4	0.435632	0.12734	0.0361292	279.8	0.375975	0.158559	0.0453003	279.8	0.170763	0.0495534	0.0124913	279.8	0.208887	0.0680847	0.0274478
280	0.830854	0.3417	0.122636	350	0.277705	0.12543	0.0443379	287.6	0.43608	0.127341	0.0355583	280	0.377312	0.15923	0.0455526	280	0.171219	0.0496561	0.0122715	280	0.209074	0.0684267	0.0274552
280.2	0.832249	0.342509	0.122979	350.2	0.277865	0.125772	0.0442782	287.8	0.436738	0.127798	0.0355637	280.2	0.378323	0.159877	0.0458072	280.2	0.172213	0.0502467	0.0121451	280.2	0.209012	0.0687314	0.0272673
280.4	0.83335	0.343757	0.123238	350.4	0.277864	0.1258	0.0439172	288	0.437181	0.127057	0.035269	280.4	0.380185	0.160922	0.0469508	280.4	0.17344	0.0505962	0.012334	280.4	0.209	0.0693599	0.0274809
280.6	0.834312	0.344422	0.123215	350.6	0.278629	0.12666	0.0435473	288.2	0.438604	0.127651	0.0354172	280.6	0.380997	0.161164	0.0467073	280.6	0.173902	0.0508231	0.0119759	280.6	0.209155	0.0700343	0.0269652
280.8	0.835961	0.346093	0.123844	350.8	0.279699	0.127859	0.044169	288.4	0.440044	0.127406	0.0348657	280.8	0.382152	0.161017	0.0469125	280.8	0.174827	0.0516666	0.0118236	280.8	0.208356	0.0698234	0.026176
281	0.837613	0.347277	0.124435	351	0.280386	0.12829	0.0441235	288.6	0.441217	0.127816	0.0350716	281	0.382902	0.161731	0.0475741	281	0.175589	0.0522221	0.0121354	281	0.208559	0.0700843	0.0261123
281.2	0.838672	0.34781	0.12497	351.2	0.280671	0.128647	0.0439963	288.8	0.442031	0.127466	0.0348189	281.2	0.383556	0.162709	0.0476417	281.2	0.175544	0.0530415	0.0118959	281.2	0.208449	0.0704667	0.0259523
281.4	0.839163	0.348931	0.125575	351.4	0.281633	0.12973	0.0447431	289	0.443027	0.127669	0.0349178	281.4	0.384642	0.163147	0.0477707	281.4	0.175359	0.0534823	0.0118906	281.4	0.208697	0.0707424	0.0259812
281.6	0.83971	0.349517	0.125512	351.6	0.282271	0.129833	0.0451852	289.2	0.44437	0.127866	0.0348763	281.6	0.385576	0.164214	0.0479395	281.6	0.175487	0.05334	0.0117556	281.6	0.208538	0.0700655	0.0257327
281.8	0.841241	0.350189	0.126216	351.8	0.282484	0.129621	0.0447342	289.4	0.445644	0.128875	0.0350037	281.8	0.386882	0.1652	0.0486168	281.8	0.175799	0.0531538	0.0116955	281.8	0.208538	0.0699998	0.0258233
282	0.841767	0.350391	0.126497	352	0.283123	0.130183	0.0447117	289.6	0.446734	0.129091	0.0354331	282	0.387472	0.165773	0.0491309	282	0.176183	0.0527839	0.0114203	282	0.208917	0.0695972	0.025674
282.2	0.843003	0.350679	0.126424	352.2	0.283723	0.130594	0.0449097	289.8	0.448359	0.129731	0.0357228	282.2	0.388657	0.166205	0.049195	282.2	0.176509	0.0527833	0.0112254	282.2	0.208421	0.06907	0.0251312
282.4	0.843926	0.350655	0.126475	352.4	0.283434	0.130608	0.0445813	290	0.449619	0.130346	0.0360065	282.4	0.389684	0.16695	0.0493264	282.4	0.176654	0.052808	0.0115928	282.4	0.207898	0.0680757	0.0247422
282.6	0.844701	0.350662	0.126804	352.6	0.283512	0.130969	0.0446775	290.2	0.450775	0.131107	0.035523	282.6	0.391627	0.168711	0.0501937	282.6	0.176909	0.0524213	0.0116907	282.6	0.207689	0.0674732	0.0248583
282.8	0.845254	0.351128	0.126711	352.8	0.283182	0.130215	0.0444256	290.4	0.452557	0.132011	0.0359016	282.8	0.392257	0.16921	0.0501336	282.8	0.17704	0.0519783	0.0119909	282.8	0.207172	0.0667156	0.0252982
283	0.84651	0.352183	0.12721	353	0.28329	0.129893	0.0444427	290.6	0.453638	0.132477	0.0359624	283	0.393058	0.169643	0.049791	283	0.177252	0.0519589	0.0124763	283	0.207326	0.0659455	0.0253132
283.2	0.848265	0.352988	0.127661	353.2	0.282633	0.129032	0.0436309	290.8	0.455031	0.133432	0.0364645	283.2	0.393214	0.169718	0.0492839	283.2	0.178295	0.0518998	0.0129783	283.2	0.207423	0.0661552	0.0254861
283.4	0.849272	0.353137	0.128054	353.4	0.282625	0.128911	0.0434417	291	0.456954	0.134404	0.0366697	283.4	0.393338	0.170253	0.0492359	283.4	0.178996	0.0524452	0.0133719	283.4	0.207738	0.0659559	0.0257496
283.6	0.850337	0.353942	0.128624	353.6	0.282684	0.128791	0.0432405	291.2	0.457648	0.13529	0.0365591	283.6	0.393507	0.169896	0.0483857	283.6	0.179523	0.0524043	0.0135783	283.6	0.207415	0.0659086	0.0259589
283.8	0.851421	0.354823	0.12897	353.8	0.282874	0.128634	0.0435293	291.4	0.458965	0.135971	0.0369144	283.8	0.394656	0.170392	0.0486814	283.8	0.180779	0.0523161	0.0137248	283.8	0.207755	0.0662749	0.0263728
284	0.852189	0.355326	0.12896	354	0.283086	0.128444	0.044024	291.6	0.460224	0.136539	0.0372197	284	0.395379	0.171242	0.0491184	284	0.18182	0.0522436	0.0137249	284	0.208163	0.0667587	0.0267345
284.2	0.853336	0.355712	0.128549	354.2	0.283829	0.128202	0.044382	291.8	0.46161	0.137647	0.0382511	284.2	0.396189	0.171206	0.0490671	284.2	0.183072	0.0530327	0.0144671	284.2	0.207548	0.0670253	0.0265597
284.4	0.854667	0.35697	0.129051	354.4	0.283619	0.128197	0.044357	292	0.462387	0.137203	0.0381871	284.4	0.397374	0.17091	0.0492786	284.4	0.184242	0.0532642	0.0147916	284.4	0.20776	0.0677707	0.0268571
284.6	0.855833	0.357525	0.12914	354.6	0.284009	0.128431	0.0443322	292.2	0.463559	0.137879	0.0384759	284.6	0.397702	0.170441	0.0489799	284.6	0.184889	0.0535513	0.0150508	284.6	0.207777	0.0674789	0.0267368
284.8	0.85677	0.358037	0.129446	354.8	0.284694	0.128933	0.044816	292.4	0.464628	0.137859	0.0384751	284.8	0.398201	0.170224	0.0491019	284.8	0.185809	0.0542047	0.0153023	284.8	0.207165	0.0671859	0.0264119
285	0.857555	0.358444	0.130037	355	0.284941	0.128778	0.044523	292.6	0.466	0.13833	0.0395387	285	0.398997	0.17099	0.0489057	285	0.185748	0.0547998	0.0148108	285	0.207215	0.0672977	0.0266696
285.2	0.858232	0.359026	0.130445	355.2	0.284653	0.128337	0.0444231	292.8	0.467775	0.138769	0.0399441	285.2	0.400262	0.172221	0.0496518	285.2	0.185636	0.0548372	0.0144624	285.2	0.207201	0.0674608	0.0268721
285.4	0.858987	0.35967	0.130683	355.4	0.285817	0.128847	0.0453599	293	0.468648	0.13862	0.039913	285.4	0.401164	0.172406	0.0500301	285.4	0.186087	0.0550733	0.0145938	285.4	0.207607	0.0678991	0.0273626
285.6	0.860284	0.360049	0.13139	355.6	0.285739	0.128434	0.0451016	293.2	0.469963	0.138871	0.0404173	285.6	0.402459	0.172797	0.0502235	285.6	0.186426	0.0547438	0.0137828	285.6	0.208017	0.0684794	0.0280994
285.8	0.861148	0.35985	0.131815	355.8	0.285934	0.129199	0.0454176	293.4	0.470936	0.139278	0.0406388	285.8	0.404189	0.173593	0.0506959	285.8	0.186533	0.0550641	0.0132258	285.8	0.207902	0.0688641	0.0280195
286	0.861352	0.360185	0.131877	356	0.286062	0.13001	0.0455069	293.6	0.471722	0.138921	0.0404978	286	0.405337	0.174106	0.0513413	286	0.186893	0.0552869	0.0128149	286	0.20784	0.0684486	0.0275259
286.2	0.862421	0.361003	0.132198	356.2	0.286419	0.130412	0.0461321	293.8	0.472319	0.138706	0.0406013	286.2	0.40686	0.174924	0.051193	286.2	0.187155	0.0552502	0.0124773	286.2	0.207335	0.0681573	0.027131
286.4	0.863715	0.361505	0.132642	356.4	0.286042	0.130498	0.0461464	294	0.472981	0.138198	0.0400684	286.4	0.407701	0.175502	0.051304	286.4	0.187421	0.0551776	0.0122223	286.4	0.207389	0.0677767	0.0272713
286.6	0.864692	0.36229	0.132753	356.6	0.286816	0.130941	0.0467063	294.2	0.473708	0.138252	0.0397821	286.6	0.408755	0.176804	0.0515619	286.6	0.187736	0.0551635	0.0119533	286.6	0.207258	0.0673512	0.0272044
286.8	0.86513	0.363213	0.132702	356.8	0.28712	0.130803	0.046981	294.4	0.474259	0.138297	0.0396374	286.8	0.409343	0.177224	0.0518037	286.8	0.188137	0.055439	0.012004	286.8	0.206869	0.0671489	0.0270278
287	0.866497	0.364358	0.133163	357	0.287228	0.130538	0.0466389	294.6	0.474635	0.138415	0.039609	287	0.409867	0.177967	0.0516665	287	0.188123	0.0550443	0.0120761	287	0.207194	0.0674488	0.0274058
287.2	0.868031	0.364963	0.133476	357.2	0.287457	0.130868	0.0467335	294.8	0.475297	0.138957	0.0394671	287.2	0.410383	0.17824	0.051723	287.2	0.188451	0.0548794	0.0120742	287.2	0.206948	0.0675466	0.0273269
287.4	0.868839	0.365446	0.133588	357.4	0.28774	0.130961	0.0470126	295	0.476217	0.139537	0.0393593	287.4	0.411288	0.178757	0.0516892	287.4	0.188626	0.0551109	0.0124616	287.4	0.206879	0.0680424	0.0274064
287.6	0.869695	0.366499	0.133619	357.6	0.288067	0.130785	0.0467911	295.2	0.476874	0.140426	0.0395362	287.6	0.412075	0.17918	0.0518817	287.6	0.189078	0.0543592	0.0123543	287.6	0.207217	0.0683736	0.0276691
287.8	0.870807	0.367449	0.133411	357.8	0.287288	0.130957	0.0467705	295.4	0.478245	0.140964	0.0396104	287.8	0.413164	0.180056	0.051993	287.8	0.189349	0.0540201	0.0120775	287.8	0.207211	0.0682866	0.0273733
288	0.871753	0.367822	0.133319	358	0.287733	0.131511	0.0475083	295.6	0.479381	0.141948	0.0402853	288	0.413648	0.180537	0.0521529	288	0.189514	0.0540473	0.0118657	288	0.206683	0.0679264	0.0266027
288.2	0.872762	0.368304	0.133305	358.2	0.287458	0.131575	0.0467595	295.8	0.479702	0.142292	0.0404257	288.2	0.414383	0.180545	0.0520289	288.2	0.190083	0.054564	0.0121537	288.2	0.205736	0.0676744	0.0259538
288.4	0.873538	0.369017	0.133364	358.4	0.286956	0.131645	0.0465843	296	0.48086	0.142431	0.0408202	288.4	0.414911	0.180761	0.0523361	288.4	0.190472	0.0548575	0.0117535	288.4	0.205891	0.0676079	0.0261078
288.6	0.87417	0.369054	0.133	358.6	0.287686	0.132015	0.0465222	296.2	0.482251	0.143124	0.0413662	288.6	0.415823	0.181016	0.0524604	288.6	0.191185	0.0553067	0.0119262	288.6	0.205232	0.0665789	0.0255029
288.8	0.874591	0.369397	0.133517	358.8	0.288189	0.132376	0.0458503	296.4	0.483518	0.143709	0.0417589	288.8	0.416343	0.181548	0.0525591	288.8	0.191343	0.0555732	0.0114315	288.8	0.205109	0.0664336	0.0249639
289	0.87527	0.370188	0.134169	359	0.288317	0.132264	0.0454827	296.6	0.485103	0.143985	0.0423585	289	0.417596	0.182294	0.0530287	289	0.191335	0.0555781	0.0112791	289	0.204849	0.0662245	0.0243645
289.2	0.875904	0.37067	0.134189	359.2	0.288549	0.132304	0.0456146	296.8	0.48672	0.144347	0.0422294	289.2	0.418064	0.18266	0.0535975	289.2	0.192405	0.0561966	0.01149	289.2	0.205276	0.0666763	0.0241786
289.4	0.876593	0.370793	0.134107	359.4	0.289357	0.132845	0.0460026	297	0.487352	0.144321	0.0417732	289.4	0.418756	0.182581	0.0535943	289.4	0.193538	0.0566677	0.0118052	289.4	0.205951	0.0669733	0.0243273
289.6	0.876872	0.370392	0.134102	359.6	0.289347	0.133048	0.0456747	297.2	0.488382	0.144598	0.0419704	289.6	0.419412	0.182743	0.0537793	289.6	0.194524	0.056744	0.011705	289.6	0.206123	0.0670968	0.0241851
289.8	0.876986	0.370345	0.133885	359.8	0.289797	0.133788	0.0461483	297.4	0.489779	0.144845	0.0420927	289.8	0.420202	0.182767	0.0538459	289.8	0.1952	0.0575992	0.0120527	289.8	0.206493	0.0672759	0.0239794
290	0.878115	0.371435	0.134595	360	0.290318	0.133829	0.0458782	297.6	0.490937	0.145024	0.0424898	290	0.421152	0.183313	0.0541523	290	0.196474	0.0581517	0.0123975	290	0.206257	0.0666791	0.0237058
290.2	0.879695	0.371625	0.134833	360.2	0.291197	0.134427	0.0471283	297.8	0.491705	0.145351	0.0423436	290.2	0.421492	0.183811	0.0538331	290.2	0.197591	0.0586464	0.0128458	290.2	0.206706	0.0670176	0.024014
290.4	0.880927	0.371625	0.134683	360.4	0.292	0.134664	0.0470639	298	0.492653	0.145568	0.0422248	290.4	0.421916	0.183701	0.0537206	290.4	0.197813	0.0587073	0.0127194	290.4	0.206439	0.0665624	0.0242044
290.6	0.881698	0.372064	0.134128	360.6	0.29294	0.134961	0.0471764	298.2	0.493568	0.14632	0.0423108	290.6	0.422567	0.184132	0.0536556	290.6	0.198291	0.0592471	0.0131176	290.6	0.206422	0.0661888	0.0240358
290.8	0.882425	0.372454	0.134488	360.8	0.293309	0.135033	0.0469536	298.4	0.494426	0.146679	0.0418376	290.8	0.42366	0.184453	0.0539788	290.8	0.19895	0.0592062	0.0132466	290.8	0.206442	0.0665388	0.0243232
291	0.883781	0.373195	0.134704	361	0.293172	0.134616	0.04686	298.6	0.495565	0.147076	0.0421715	291	0.423795	0.184912	0.0537356	291	0.199197	0.0595183	0.0136547	291	0.207493	0.0668503	0.0251793
291.2	0.885204	0.374049	0.13518	361.2	0.293422	0.134932	0.0469441	298.8	0.496413	0.147731	0.0419767	291.2	0.425073	0.185452	0.0540385	291.2	0.19957	0.0597105	0.0139207	291.2	0.207654	0.0668059	0.0252351
291.4	0.88628	0.374716	0.135626	361.4	0.293241	0.134657	0.0471669	299	0.497629	0.148714	0.0424642	291.4	0.426287	0.18592	0.0541686	291.4	0.199901	0.0595441	0.0139183	291.4	0.208045	0.0672332	0.0259504
291.6	0.88765	0.375368	0.13634	361.6	0.293651	0.135076	0.0472569	299.2	0.498561	0.149023	0.0423615	291.6	0.427101	0.186494	0.054376	291.6	0.199818	0.05874	0.013375	291.6	0.208665	0.0670565	0.026097
291.8	0.888452	0.37571	0.136515	361.8	0.292983	0.135074	0.0475945	299.4	0.499797	0.149465	0.042462	291.8	0.427722	0.187123	0.0545079	291.8	0.200082	0.0587978	0.0129729	291.8	0.208254	0.0668544	0.0256762
292	0.889478	0.375827	0.137104	362	0.293592	0.135334	0.0482163	299.6	0.500787	0.149805	0.0428178	292	0.427992	0.187342	0.0545483	292	0.200173	0.0583709	0.0132035	292	0.208525	0.0675246	0.0256178
292.2	0.890651	0.376826	0.137876	362.2	0.293353	0.134882	0.0478393	299.8	0.501221	0.149566	0.0433568	292.2	0.428372	0.187338	0.0542478	292.2	0.200677	0.0584324	0.0134183	292.2	0.208347	0.0679226	0.0256125
292.4	0.891273	0.377409	0.13835	362.4	0.293603	0.135005	0.048471	300	0.502448	0.149783	0.0440265	292.4	0.429302	0.187703	0.0547759	292.4	0.201025	0.0586178	0.0135525	292.4	0.208433	0.0682053	0.025982
292.6	0.892575	0.378616	0.138819	362.6	0.2937	0.134703	0.0483114	300.2	0.502954	0.149419	0.0438744	292.6	0.429859	0.187618	0.0549007	292.6	0.20143	0.0584692	0.013575	292.6	0.208701	0.0684199	0.0256854
292.8	0.893571	0.379343	0.139539	362.8	0.293658	0.134424	0.0482969	300.4	0.503373	0.149448	0.0440793	292.8	0.430136	0.187798	0.0551443	292.8	0.201487	0.058381	0.0135175	292.8	0.209032	0.0687914	0.0259046
293	0.894215	0.379939	0.139391	363	0.293538	0.134245	0.0487015	300.6	0.504597	0.149689	0.0445203	293	0.431121	0.188168	0.0556092	293	0.201879	0.0583505	0.0136937	293	0.208806	0.0688336	0.0259049
293.2	0.894647	0.380158	0.139394	363.2	0.294015	0.134159	0.0489362	300.8	0.505591	0.149833	0.0442628	293.2	0.431123	0.188125	0.0557743	293.2	0.202435	0.058454	0.013749	293.2	0.209385	0.0693647	0.0264927
293.4	0.895355	0.380448	0.139886	363.4	0.294432	0.134344	0.0492198	301	0.506221	0.149973	0.044174	293.4	0.431487	0.188443	0.0560025	293.4	0.202717	0.0582915	0.0138619	293.4	0.209585	0.0693551	0.0268467
293.6	0.896316	0.380929	0.140776	363.6	0.294516	0.134703	0.0491625	301.2	0.507294	0.150616	0.0444988	293.6	0.431785	0.18802	0.055514	293.6	0.203079	0.0583374	0.0140389	293.6	0.209247	0.069394	0.0268566
293.8	0.897218	0.381784	0.141059	363.8	0.294795	0.135136	0.0492377	301.4	0.508096	0.150914	0.0443526	293.8	0.432333	0.188219	0.0552688	293.8	0.203444	0.0588329	0.0141097	293.8	0.209468	0.0699381	0.0272465
294	0.89875	0.382818	0.142153	364	0.295308	0.135773	0.0494159	301.6	0.509471	0.151789	0.0446255	294	0.43342	0.189295	0.0555756	294	0.204193	0.0591684	0.0137971	294	0.208788	0.0693502	0.0270759
294.2	0.899125	0.38243	0.141756	364.2	0.295658	0.136222	0.0495533	301.8	0.510378	0.152054	0.0443441	294.2	0.433795	0.189859	0.0555472	294.2	0.205057	0.0592888	0.0139222	294.2	0.209061	0.0697595	0.0270308
294.4	0.899114	0.382773	0.141659	364.4	0.295574	0.136111	0.0487915	302	0.511	0.152421	0.0440244	294.4	0.434952	0.190198	0.0558247	294.4	0.205447	0.0589364	0.0136345	294.4	0.208238	0.0688226	0.0263751
294.6	0.899632	0.382943	0.141554	364.6	0.295681	0.136588	0.0487001	302.2	0.512118	0.153139	0.0440898	294.6	0.436461	0.191234	0.0563484	294.6	0.206005	0.0592518	0.0140839	294.6	0.20787	0.068564	0.0257749
294.8	0.900264	0.38344	0.141802	364.8	0.295706	0.136866	0.0485879	302.4	0.513279	0.154044	0.0442829	294.8	0.437614	0.192283	0.0569833	294.8	0.206764	0.0592626	0.0144044	294.8	0.208281	0.0685044	0.0260295
295	0.900667	0.384068	0.141585	365	0.295369	0.136585	0.0485936	302.6	0.51415	0.154646	0.0447249	295	0.438801	0.193136	0.0575539	295	0.208054	0.0601223	0.0152525	295	0.208381	0.0680252	0.0260266
295.2	0.901843	0.38474	0.142287	365.2	0.295651	0.136841	0.0484933	302.8	0.514781	0.155538	0.0446136	295.2	0.440404	0.19425	0.0580374	295.2	0.208517	0.0596652	0.0150375	295.2	0.208482	0.0678949	0.026169
295.4	0.902519	0.384794	0.142399	365.4	0.295889	0.136592	0.0484632	303	0.516111	0.156547	0.0456382	295.4	0.44184	0.195184	0.0584553	295.4	0.209242	0.059574	0.0152794	295.4	0.208329	0.0678595	0.0264142
295.6	0.903161	0.384872	0.142645	365.6	0.296305	0.136678	0.0488224	303.2	0.516975	0.156412	0.0453803	295.6	0.442808	0.195813	0.0585843	295.6	0.209729	0.0597428	0.0150478	295.6	0.208921	0.068115	0.0265019
295.8	0.903877	0.38523	0.142545	365.8	0.295848	0.136387	0.0485529	303.4	0.517989	0.157163	0.0458691	295.8	0.443301	0.196127	0.058763	295.8	0.210556	0.0603587	0.0158587	295.8	0.209067	0.0686302	0.0266434
296	0.905372	0.386216	0.142855	366	0.296541	0.136842	0.0487688	303.6	0.518266	0.157398	0.0461138	296	0.44385	0.196506	0.0587097	296	0.211249	0.0608322	0.0165925	296	0.209497	0.0695623	0.0270746
296.2	0.906694	0.386981	0.142599	366.2	0.296741	0.136338	0.048848	303.8	0.519052	0.157712	0.0469965	296.2	0.444741	0.197171	0.058662	296.2	0.212018	0.0612171	0.0167212	296.2	0.209354	0.0696162	0.0274027
296.4	0.907584	0.38717	0.142297	366.4	0.296917	0.136365	0.048864	304	0.519638	0.158158	0.0467576	296.4	0.445816	0.197889	0.0591672	296.4	0.212388	0.0617411	0.0167345	296.4	0.209167	0.0697392	0.02783
296.6	0.909383	0.387871	0.142147	366.6	0.297235	0.135842	0.0485037	304.2	0.52041	0.158384	0.046847	296.6	0.446041	0.198208	0.0593442	296.6	0.213039	0.0622861	0.016815	296.6	0.20878	0.0691498	0.027726
296.8	0.91035	0.387804	0.142381	366.8	0.297576	0.135977	0.0486936	304.4	0.521973	0.15943	0.0477729	296.8	0.446969	0.198458	0.0595922	296.8	0.213447	0.0630423	0.0172513	296.8	0.208601	0.0684357	0.0273905
297	0.911443	0.388401	0.142748	367	0.297686	0.136072	0.0487054	304.6	0.522837	0.159278	0.047259	297	0.447711	0.19869	0.059695	297	0.214056	0.0640017	0.0174727	297	0.208731	0.0685495	0.0278231
297.2	0.912737	0.38889	0.143401	367.2	0.298472	0.136798	0.0490726	304.8	0.523317	0.158896	0.0466517	297.2	0.448132	0.198681	0.0594162	297.2	0.214234	0.0643028	0.0169412	297.2	0.208735	0.0684585	0.0279095
297.4	0.913992	0.389629	0.143849	367.4	0.298761	0.137079	0.0493559	305	0.523985	0.158853	0.0462859	297.4	0.448699	0.198821	0.0591054	297.4	0.214522	0.0647973	0.0162624	297.4	0.208404	0.0680468	0.0275475
297.6	0.915291	0.390583	0.144326	367.6	0.298543	0.136863	0.0488458	305.2	0.524219	0.158365	0.0453687	297.6	0.449652	0.199403	0.058787	297.6	0.214409	0.0647433	0.0157567	297.6	0.207813	0.068045	0.0271961
297.8	0.916073	0.391299	0.144268	367.8	0.299262	0.137295	0.0492595	305.4	0.524932	0.157985	0.0451165	297.8	0.450025	0.200196	0.0592657	297.8	0.214865	0.0649806	0.0148516	297.8	0.207588	0.0683198	0.0271239
298	0.916367	0.391686	0.144361	368	0.299623	0.137512	0.0493188	305.6	0.526518	0.15835	0.0454796	298	0.451004	0.201046	0.05944	298	0.215506	0.0649943	0.0142581	298	0.207203	0.0680884	0.0264823
298.2	0.916496	0.391667	0.144077	368.2	0.299129	0.137348	0.0490027	305.8	0.526669	0.158012	0.0449429	298.2	0.451445	0.201507	0.0596286	298.2	0.215945	0.0641621	0.0140088	298.2	0.20645	0.0677677	0.0259445
298.4	0.917136	0.392358	0.144569	368.4	0.299015	0.137233	0.049002	306	0.527162	0.158546	0.0448541	298.4	0.452313	0.201911	0.0599817	298.4	0.21594	0.0634859	0.0140459	298.4	0.205853	0.067403	0.0252163
298.6	0.917957	0.392847	0.145167	368.6	0.298855	0.137275	0.0489534	306.2	0.527941	0.158609	0.0450034	298.6	0.45299	0.202199	0.060372	298.6	0.216271	0.0633426	0.0138954	298.6	0.205292	0.0670439	0.0247856
298.8	0.918343	0.393676	0.145213	368.8	0.298559	0.136628	0.0484946	306.4	0.528838	0.15914	0.0454775	298.8	0.453439	0.202966	0.0607417	298.8	0.216785	0.0629076	0.0139452	298.8	0.205442	0.0667289	0.0244228
299	0.918765	0.394011	0.14538	369	0.298567	0.136616	0.0485952	306.6	0.529355	0.158949	0.0450957	299	0.454003	0.203381	0.0607516	299	0.217702	0.0624451	0.0135116	299	0.205199	0.0661902	0.0240616
299.2	0.919641	0.394888	0.145663	369.2	0.298585	0.136224	0.0486489	306.8	0.529675	0.159371	0.0449796	299.2	0.454553	0.204102	0.0610583	299.2	0.217457	0.0623262	0.0131483	299.2	0.20581	0.0663577	0.0240693
299.4	0.919535	0.394958	0.144787	369.4	0.298867	0.136246	0.0487361	307	0.530647	0.160091	0.045465	299.4	0.454851	0.204241	0.06062	299.4	0.21855	0.0625887	0.0135032	299.4	0.205588	0.066285	0.024092
299.6	0.919877	0.395271	0.144612	369.6	0.298811	0.136163	0.0491283	307.2	0.531232	0.160002	0.0453728	299.6	0.454886	0.204026	0.0600203	299.6	0.21867	0.0626412	0.0132198	299.6	0.206739	0.0666096	0.0245458
299.8	0.920755	0.395808	0.144544	369.8	0.298741	0.136305	0.0490494	307.4	0.532207	0.160602	0.0458777	299.8	0.45505	0.20459	0.0601862	299.8	0.21915	0.0628768	0.0136634	299.8	0.207064	0.0671772	0.0251842
300	0.92202	0.396534	0.144636	370	0.299429	0.136749	0.0496711	307.6	0.533174	0.161403	0.0461739	300	0.455771	0.204755	0.0603073	300	0.219797	0.0632828	0.014145	300	0.207246	0.0674643	0.025777
300.2	0.922611	0.396372	0.14495	370.2	0.299446	0.137365	0.0499749	307.8	0.534254	0.161628	0.0463476	300.2	0.456479	0.205354	0.0602303	300.2	0.219984	0.0627143	0.0144379	300.2	0.207201	0.0669074	0.0261397
300.4	0.923157	0.396968	0.145293	370.4	0.299637	0.138039	0.0500422	308	0.535194	0.162105	0.0470181	300.4	0.456871	0.205622	0.0598827	300.4	0.220385	0.063233	0.0150676	300.4	0.207119	0.066879	0.0260443
300.6	0.923995	0.397334	0.145605	370.6	0.299735	0.138184	0.050062	308.2	0.536104	0.162058	0.0469169	300.6	0.457159	0.205689	0.0597313	300.6	0.221227	0.0635795	0.0156198	300.6	0.20707	0.0669992	0.0264181
300.8	0.924673	0.397502	0.146104	370.8	0.300056	0.13919	0.0506714	308.4	0.537345	0.162711	0.0472932	300.8	0.45818	0.205918	0.0597453	300.8	0.221284	0.0642639	0.0159263	300.8	0.207644	0.0673588	0.0267197
301	0.925923	0.398438	0.146654	371	0.300679	0.14031	0.0511117	308.6	0.537578	0.162467	0.0469319	301	0.45905	0.206247	0.0597374	301	0.221695	0.0652933	0.0162241	301	0.207872	0.0675599	0.0275487
301.2	0.927071	0.399358	0.147253	371.2	0.301117	0.141115	0.0515917	308.8	0.538015	0.162264	0.0471781	301.2	0.459815	0.206896	0.0592556	301.2	0.221291	0.0652222	0.0162576	301.2	0.207515	0.0675522	0.0279102
301.4	0.927994	0.400227	0.147435	371.4	0.301433	0.141251	0.0517153	309	0.538847	0.162589	0.0474129	301.4	0.460259	0.207257	0.0597255	301.4	0.221202	0.0658059	0.0164303	301.4	0.207112	0.0678923	0.0277041
301.6	0.928933	0.400392	0.148009	371.6	0.301673	0.141121	0.0512166	309.2	0.540069	0.163016	0.0475784	301.6	0.460639	0.207874	0.0601553	301.6	0.221192	0.0657457	0.0169276	301.6	0.206564	0.0680714	0.0279451
301.8	0.929718	0.401082	0.148153	371.8	0.302271	0.141645	0.0516116	309.4	0.541412	0.163365	0.0483764	301.8	0.461589	0.207884	0.0610268	301.8	0.221518	0.0663197	0.0165261	301.8	0.206864	0.0685195	0.0280314
302	0.930278	0.401516	0.148611	372	0.30204	0.14143	0.051149	309.6	0.542016	0.16344	0.0486532	302	0.462454	0.20865	0.0618732	302	0.222177	0.0664303	0.0163235	302	0.206997	0.068698	0.0280054
302.2	0.931393	0.402238	0.149446	372.2	0.302248	0.141183	0.0508177	309.8	0.54237	0.163777	0.0483541	302.2	0.463123	0.209469	0.0624919	302.2	0.222058	0.0665246	0.0162937	302.2	0.206422	0.0684891	0.0280236
302.4	0.93268	0.403447	0.150324	372.4	0.302597	0.14114	0.0508585	310	0.542683	0.163798	0.0484274	302.4	0.464096	0.210197	0.0632966	302.4	0.222432	0.0666743	0.0162914	302.4	0.206378	0.0684999	0.027464
302.6	0.933546	0.40368	0.151167	372.6	0.302851	0.140978	0.0509542	310.2	0.543098	0.163663	0.0483795	302.6	0.464763	0.21077	0.063904	302.6	0.223177	0.0670787	0.0160445	302.6	0.206303	0.0683392	0.0272833
302.8	0.934082	0.403715	0.151141	372.8	0.30306	0.140831	0.0507239	310.4	0.543678	0.164493	0.048998	302.8	0.465683	0.211933	0.0646239	302.8	0.223879	0.0674593	0.0161149	302.8	0.206711	0.0685388	0.0268193
303	0.935077	0.403972	0.151355	373	0.303591	0.140934	0.0508651	310.6	0.544442	0.165088	0.0487572	303	0.466006	0.212425	0.0644015	303	0.224564	0.0675325	0.0155122	303	0.207143	0.0681245	0.0271766
303.2	0.935407	0.40421	0.150661	373.2	0.303517	0.14021	0.0506019	310.8	0.544931	0.165591	0.0487027	303.2	0.466059	0.212571	0.064301	303.2	0.225157	0.0680132	0.0157161	303.2	0.207093	0.0681281	0.027018
303.4	0.935697	0.404114	0.150131	373.4	0.304053	0.140567	0.050751	311	0.546404	0.166269	0.0491388	303.4	0.466355	0.213151	0.0636483	303.4	0.226328	0.068025	0.015538	303.4	0.207006	0.06842	0.027049
303.6	0.936248	0.403844	0.150197	373.6	0.304441	0.140439	0.0509922	311.2	0.54745	0.166456	0.0490253	303.6	0.467054	0.213656	0.0640267	303.6	0.226753	0.0675419	0.0154399	303.6	0.208076	0.0686268	0.0276381
303.8	0.937316	0.404104	0.150361	373.8	0.304613	0.140668	0.0510232	311.4	0.548215	0.166998	0.0485748	303.8	0.467468	0.214078	0.0641834	303.8	0.227087	0.0672474	0.015088	303.8	0.208349	0.0690829	0.0281907
304	0.938178	0.404373	0.150629	374	0.304841	0.140958	0.0509358	311.6	0.548873	0.167512	0.0481984	304	0.468452	0.214259	0.0644549	304	0.22754	0.0666978	0.0155871	304	0.208772	0.0692142	0.0286828
304.2	0.938533	0.404734	0.150939	374.2	0.305025	0.141564	0.0506786	311.8	0.549261	0.16664	0.047807	304.2	0.468495	0.214627	0.0640195	304.2	0.228805	0.0663925	0.0156838	304.2	0.208746	0.069072	0.0286766
304.4	0.939128	0.405389	0.150713	374.4	0.305272	0.141859	0.0508366	312	0.550116	0.16711	0.0482715	304.4	0.468391	0.214542	0.0629044	304.4	0.2296	0.0664251	0.0158954	304.4	0.208994	0.0693814	0.0286076
304.6	0.939799	0.405216	0.150468	374.6	0.305537	0.142273	0.0512937	312.2	0.550821	0.167168	0.0476479	304.6	0.469087	0.214839	0.0628807	304.6	0.230274	0.0664205	0.0160081	304.6	0.208851	0.0693203	0.0290913
304.8	0.940768	0.405431	0.150741	374.8	0.306033	0.14324	0.0516667	312.4	0.55151	0.167266	0.0481237	304.8	0.469455	0.215118	0.0623162	304.8	0.230462	0.0668885	0.0158168	304.8	0.208951	0.0690587	0.0287412
305	0.941977	0.4059	0.150911	375	0.306607	0.143757	0.0519766	312.6	0.55233	0.167444	0.0483588	305	0.470241	0.21505	0.0624236	305	0.231565	0.067325	0.0164384	305	0.208555	0.0689383	0.0282744
305.2	0.942809	0.406024	0.150915	375.2	0.306616	0.143641	0.0520146	312.8	0.552722	0.167707	0.0486073	305.2	0.4702	0.214501	0.0616039	305.2	0.232117	0.0674699	0.0167504	305.2	0.207716	0.0688074	0.0276923
305.4	0.94379	0.406102	0.150638	375.4	0.307066	0.143644	0.052163	313	0.553571	0.168333	0.0484634	305.4	0.470699	0.214151	0.0623898	305.4	0.232524	0.0676611	0.0167211	305.4	0.207561	0.0689593	0.0273347
305.6	0.94482	0.406681	0.151175	375.6	0.307298	0.143476	0.0520439	313.2	0.554318	0.168609	0.0483332	305.6	0.471344	0.21407	0.062423	305.6	0.233135	0.0675384	0.0165712	305.6	0.207477	0.0690453	0.0273827
305.8	0.945578	0.407734	0.15144	375.8	0.307361	0.143763	0.0519807	313.4	0.554382	0.168368	0.048392	305.8	0.472207	0.214451	0.0627465	305.8	0.233923	0.0686125	0.0162377	305.8	0.207818	0.069624	0.0271552
306	0.946321	0.408526	0.152243	376	0.307922	0.144116	0.0521573	313.6	0.55516	0.168973	0.0486387	306	0.472838	0.215309	0.06315	306	0.234138	0.0687245	0.0161969	306	0.207454	0.0694353	0.0270817
306.2	0.947174	0.409598	0.153	376.2	0.308543	0.144303	0.0521672	313.8	0.555922	0.169697	0.048509	306.2	0.473892	0.216339	0.0630678	306.2	0.234244	0.0692352	0.0166381	306.2	0.207143	0.0692828	0.0265991
306.4	0.947825	0.410422	0.15355	376.4	0.308614	0.14424	0.0525573	314	0.556394	0.169698	0.0491613	306.4	0.474678	0.216783	0.0635398	306.4	0.234592	0.0694027	0.0165816	306.4	0.207471	0.0690054	0.0263119
306.6	0.948708	0.410631	0.154578	376.6	0.308774	0.144716	0.0529332	314.2	0.557435	0.170444	0.0498898	306.6	0.474776	0.217035	0.0630014	306.6	0.235378	0.0697759	0.0170206	306.6	0.20786	0.0693672	0.0263648
306.8	0.94935	0.411181	0.154807	376.8	0.308484	0.144645	0.0526242	314.4	0.55894	0.171623	0.0508802	306.8	0.475209	0.217611	0.0629994	306.8	0.236292	0.0703993	0.0175277	306.8	0.207356	0.0690106	0.0259258
307	0.950111	0.411729	0.154943	377	0.30874	0.144267	0.052253	314.6	0.559761	0.172185	0.0510939	307	0.475889	0.218351	0.0631599	307	0.236773	0.0706115	0.0176747	307	0.207123	0.0685042	0.0262002
307.2	0.950636	0.411921	0.155124	377.2	0.308387	0.1441	0.0520637	314.8	0.560534	0.172545	0.0511754	307.2	0.476536	0.219014	0.0633591	307.2	0.236974	0.0706468	0.0180519	307.2	0.206921	0.0685963	0.0260261
307.4	0.951387	0.412549	0.155624	377.4	0.308348	0.144007	0.0521749	315	0.561386	0.172895	0.0512613	307.4	0.477643	0.220362	0.06387	307.4	0.237016	0.0705165	0.0176965	307.4	0.207475	0.0688571	0.0264202
307.6	0.952186	0.412928	0.155983	377.6	0.307623	0.143325	0.0516858	315.2	0.562202	0.172829	0.0509541	307.6	0.47823	0.220507	0.0642376	307.6	0.237357	0.0702006	0.0178101	307.6	0.208123	0.0687452	0.0275002
307.8	0.953119	0.413664	0.156298	377.8	0.307349	0.143035	0.0517935	315.4	0.562835	0.172683	0.0506775	307.8	0.47868	0.22049	0.0638108	307.8	0.237284	0.0699966	0.017428	307.8	0.20842	0.0686748	0.0273
308	0.953474	0.414222	0.156623	378	0.306579	0.142409	0.0512664	315.6	0.564104	0.172633	0.0511808	308	0.47932	0.221087	0.0641007	308	0.23801	0.0695088	0.0173137	308	0.208076	0.0682468	0.0271814
308.2	0.954104	0.414871	0.156791	378.2	0.306285	0.142239	0.0509347	315.8	0.564853	0.172343	0.0514008	308.2	0.479514	0.221007	0.0636175	308.2	0.238819	0.0696079	0.0173037	308.2	0.207739	0.0678787	0.0266622
308.4	0.954916	0.414836	0.156375	378.4	0.305968	0.142284	0.0510683	316	0.565541	0.172793	0.0517563	308.4	0.479865	0.220944	0.063132	308.4	0.23886	0.0696736	0.0170626	308.4	0.208084	0.0679393	0.0268998
308.6	0.955433	0.414745	0.156365	378.6	0.305897	0.142289	0.0511968	316.2	0.566201	0.173096	0.0519972	308.6	0.48079	0.220854	0.0632688	308.6	0.239167	0.0697791	0.0170792	308.6	0.207798	0.0675444	0.0268673
308.8	0.956268	0.415191	0.156461	378.8	0.306004	0.1421	0.0512255	316.4	0.5675	0.173724	0.0526503	308.8	0.481232	0.220834	0.0634778	308.8	0.24016	0.0702337	0.016962	308.8	0.207656	0.0675333	0.026564
309	0.957144	0.415181	0.156549	379	0.306287	0.141956	0.0512315	316.6	0.569117	0.175055	0.0533185	309	0.482395	0.220732	0.0639509	309	0.240755	0.0703219	0.0165968	309	0.207177	0.0674377	0.0263213
309.2	0.957598	0.415322	0.156712	379.2	0.306018	0.141696	0.0509919	316.8	0.569503	0.175312	0.0532176	309.2	0.482459	0.220406	0.0637812	309.2	0.241005	0.0702025	0.0164127	309.2	0.206925	0.0672192	0.0261771
309.4	0.957878	0.415237	0.156365	379.4	0.306436	0.141959	0.0510562	317	0.569929	0.175425	0.0523649	309.4	0.483376	0.220698	0.0645422	309.4	0.241121	0.0696141	0.0168971	309.4	0.206971	0.0675282	0.0263706
309.6	0.958289	0.415936	0.157063	379.6	0.307039	0.142303	0.0508768	317.2	0.570637	0.175616	0.05223	309.6	0.484043	0.220778	0.0645627	309.6	0.241479	0.0695317	0.0167953	309.6	0.206872	0.0673957	0.0262968
309.8	0.958636	0.416157	0.15737	379.8	0.30732	0.142766	0.0504218	317.4	0.571219	0.175845	0.0520363	309.8	0.484588	0.221244	0.0649227	309.8	0.242001	0.0696629	0.0170969	309.8	0.207266	0.0674003	0.026405
310	0.959115	0.416737	0.157349	380	0.308319	0.143419	0.0508497	317.6	0.572402	0.176688	0.0521413	310	0.485643	0.221678	0.0657197	310	0.242405	0.0697926	0.0175302	310	0.207088	0.0672552	0.0261882
310.2	0.959677	0.417046	0.157613	380.2	0.308951	0.143743	0.0510789	317.8	0.573072	0.177063	0.051827	310.2	0.485613	0.222159	0.0656878	310.2	0.243105	0.0703737	0.0178544	310.2	0.207405	0.0673859	0.0259882
310.4	0.960113	0.417336	0.157688	380.4	0.309528	0.143837	0.0512977	318	0.573506	0.177152	0.0522874	310.4	0.485738	0.222918	0.0662898	310.4	0.243669	0.0703609	0.0180865	310.4	0.207485	0.0670869	0.0257717
310.6	0.960729	0.418028	0.158116	380.6	0.309614	0.144385	0.0516159	318.2	0.574437	0.177615	0.0523684	310.6	0.485799	0.223436	0.0667467	310.6	0.244277	0.0705065	0.0184731	310.6	0.207451	0.0673353	0.0256658
310.8	0.960878	0.41834	0.157979	380.8	0.310165	0.144376	0.0514715	318.4	0.575198	0.177847	0.0525917	310.8	0.486313	0.224265	0.0676754	310.8	0.24474	0.0704877	0.0186512	310.8	0.207613	0.0670428	0.026158
311	0.961242	0.417984	0.157988	381	0.310696	0.144397	0.0515404	318.6	0.57526	0.177973	0.0521503	311	0.487045	0.224925	0.0682847	311	0.244901	0.0707227	0.0185152	311	0.207954	0.0668613	0.02618
311.2	0.962155	0.418519	0.158747	381.2	0.311523	0.144667	0.0525384	318.8	0.575829	0.177639	0.0520341	311.2	0.487791	0.225873	0.0683342	311.2	0.24494	0.0705908	0.018299	311.2	0.208633	0.0669013	0.0265699
311.4	0.963009	0.419018	0.158854	381.4	0.312066	0.144801	0.0531172	319	0.576545	0.177463	0.0518465	311.4	0.488193	0.226541	0.0685408	311.4	0.245255	0.070826	0.0180234	311.4	0.209107	0.0668214	0.0268858
311.6	0.963284	0.419255	0.158937	381.6	0.312042	0.144805	0.0538113	319.2	0.577875	0.177859	0.0524908	311.6	0.488942	0.226746	0.0681506	311.6	0.246169	0.0707066	0.0181242	311.6	0.20894	0.0662873	0.0267469
311.8	0.96403	0.419564	0.159343	381.8	0.312421	0.14474	0.0544364	319.4	0.578434	0.178174	0.0524738	311.8	0.489812	0.227292	0.0681794	311.8	0.246877	0.0710731	0.0179931	311.8	0.209075	0.0661117	0.0258965
312	0.964683	0.420672	0.15942	382	0.312022	0.144623	0.0542831	319.6	0.579331	0.178435	0.0526808	312	0.490028	0.228134	0.0685614	312	0.247454	0.0711527	0.0179862	312	0.208793	0.0662291	0.0257281
312.2	0.96542	0.420702	0.159275	382.2	0.312044	0.144941	0.0545517	319.8	0.578937	0.178394	0.0520545	312.2	0.49088	0.228416	0.0688577	312.2	0.247526	0.0715554	0.0180571	312.2	0.208847	0.0664399	0.0256584
312.4	0.966441	0.421231	0.159327	382.4	0.31217	0.145343	0.0546064	320	0.579608	0.179268	0.0520031	312.4	0.490747	0.228643	0.0687774	312.4	0.248294	0.0719209	0.0184445	312.4	0.20905	0.066765	0.0258714
312.6	0.967497	0.422082	0.160236	382.6	0.311824	0.145257	0.0547828	320.2	0.58062	0.180057	0.0526594	312.6	0.491771	0.229272	0.0692905	312.6	0.248925	0.0717979	0.019025	312.6	0.208805	0.0669566	0.0258761
312.8	0.968572	0.422762	0.160181	382.8	0.311786	0.145287	0.0547439	320.4	0.581689	0.180358	0.0530476	312.8	0.492114	0.229502	0.0694633	312.8	0.249403	0.072108	0.0188753	312.8	0.208925	0.0673587	0.0264073
313	0.969032	0.422956	0.160423	383	0.311603	0.145868	0.0546237	320.6	0.581571	0.180302	0.0529089	313	0.492465	0.229424	0.0690783	313	0.249	0.0717106	0.0185548	313	0.208698	0.0676444	0.0261454
313.2	0.969597	0.423178	0.160875	383.2	0.311268	0.14592	0.0545959	320.8	0.5817	0.180245	0.0522773	313.2	0.492946	0.229283	0.0694402	313.2	0.24935	0.0716011	0.0189785	313.2	0.208516	0.0673399	0.0261376
313.4	0.96983	0.423521	0.16052	383.4	0.31154	0.146388	0.0547243	321	0.581612	0.179956	0.051982	313.4	0.493788	0.229519	0.0697346	313.4	0.249921	0.0716252	0.0198718	313.4	0.208234	0.0673278	0.0263046
313.6	0.970554	0.42471	0.161099	383.6	0.311376	0.146337	0.0541678	321.2	0.582427	0.180276	0.0522814	313.6	0.494259	0.229209	0.0699363	313.6	0.250223	0.0717887	0.0190355	313.6	0.208282	0.0672714	0.0262499
313.8	0.971151	0.424868	0.161054	383.8	0.310865	0.146528	0.0541421	321.4	0.582932	0.180762	0.052679	313.8	0.494384	0.229049	0.070098	313.8	0.250528	0.0725534	0.0192653	313.8	0.208451	0.0680791	0.0266777
314	0.971558	0.425697	0.161245	384	0.311131	0.146886	0.0548451	321.6	0.5833	0.180707	0.0528395	314	0.494922	0.229536	0.070251	314	0.251249	0.0735005	0.0196092	314	0.207764	0.0680959	0.0264266
314.2	0.971855	0.426325	0.161023	384.2	0.311311	0.14715	0.0551384	321.8	0.583599	0.180628	0.0526656	314.2	0.494981	0.229993	0.0703417	314.2	0.25101	0.073639	0.0194194	314.2	0.208009	0.0679168	0.0261323
314.4	0.972284	0.427018	0.161284	384.4	0.311598	0.146753	0.0550217	322	0.583597	0.180752	0.0533456	314.4	0.495294	0.230286	0.070388	314.4	0.251315	0.0738278	0.0192979	314.4	0.208146	0.0681915	0.0262612
314.6	0.972787	0.427699	0.161891	384.6	0.311512	0.146106	0.0547474	322.2	0.584012	0.180517	0.0530685	314.6	0.495695	0.230053	0.0704983	314.6	0.251246	0.0739308	0.019407	314.6	0.207859	0.0680006	0.0262135
314.8	0.973968	0.427584	0.162423	384.8	0.312152	0.146053	0.0544314	322.4	0.584341	0.180415	0.053314	314.8	0.496325	0.230225	0.0697177	314.8	0.251742	0.0739744	0.0196843	314.8	0.208186	0.0679921	0.0264474
315	0.975024	0.427373	0.162652	385	0.312682	0.146255	0.0547209	322.6	0.584578	0.18044	0.0534388	315	0.497469	0.230545	0.0695714	315	0.252419	0.0748299	0.0200261	315	0.208048	0.0679991	0.0256796
315.2	0.975804	0.427382	0.163117	385.2	0.313529	0.146163	0.0553446	322.8	0.584541	0.179954	0.0533078	315.2	0.498691	0.231506	0.0697213	315.2	0.253467	0.0754109	0.0199855	315.2	0.207884	0.0681401	0.0258534
315.4	0.976614	0.427551	0.163275	385.4	0.313497	0.145845	0.0553695	323	0.584737	0.179859	0.0531964	315.4	0.499849	0.23227	0.0700837	315.4	0.254303	0.0760545	0.0200061	315.4	0.208057	0.0679343	0.0256971
315.6	0.977083	0.427867	0.163646	385.6	0.31357	0.145754	0.0551396	323.2	0.585487	0.180516	0.0536046	315.6	0.501004	0.232956	0.0704945	315.6	0.255121	0.0760009	0.0199111	315.6	0.207717	0.0677298	0.0256875
315.8	0.978068	0.428119	0.164365	385.8	0.314105	0.146111	0.0548715	323.4	0.585812	0.180677	0.0534525	315.8	0.501914	0.233979	0.071052	315.8	0.256009	0.0764692	0.0200185	315.8	0.208035	0.0681398	0.0255275
316	0.978553	0.428608	0.164201	386	0.314607	0.146923	0.0552677	323.6	0.586689	0.180608	0.0533023	316	0.502305	0.234936	0.0718168	316	0.25609	0.076167	0.0201536	316	0.207779	0.0681004	0.0256615
316.2	0.978891	0.427886	0.163773	386.2	0.314703	0.146947	0.054833	323.8	0.587088	0.181049	0.053383	316.2	0.502718	0.235943	0.0720299	316.2	0.25648	0.0759503	0.0200955	316.2	0.207953	0.0683126	0.025848
316.4	0.979999	0.428664	0.164312	386.4	0.315155	0.147158	0.0543988	324	0.588364	0.181855	0.0537027	316.4	0.503111	0.236449	0.0721199	316.4	0.257061	0.0759149	0.0203629	316.4	0.208591	0.0687187	0.0262115
316.6	0.980838	0.428291	0.164267	386.6	0.315596	0.147277	0.0545424	324.2	0.589132	0.182185	0.0542036	316.6	0.504009	0.237288	0.0725863	316.6	0.257368	0.0757082	0.0204844	316.6	0.208957	0.0687195	0.026673
316.8	0.981117	0.428604	0.163572	386.8	0.316339	0.147783	0.0544092	324.4	0.589902	0.182517	0.0543667	316.8	0.504137	0.237125	0.0726772	316.8	0.257468	0.0755236	0.020298	316.8	0.209432	0.0690141	0.0275185
317	0.981343	0.42867	0.163706	387	0.316897	0.148327	0.0548199	324.6	0.590332	0.182706	0.0545101	317	0.504983	0.237867	0.0732371	317	0.258106	0.0752406	0.0204702	317	0.209465	0.0685614	0.0271851
317.2	0.981766	0.428788	0.1637	387.2	0.316943	0.148017	0.0545579	324.8	0.591768	0.18334	0.0544756	317.2	0.505412	0.238253	0.074132	317.2	0.258873	0.0749433	0.0204104	317.2	0.210048	0.0682399	0.0273061
317.4	0.981528	0.42899	0.163301	387.4	0.317112	0.148251	0.0543126	325	0.592935	0.183668	0.0553949	317.4	0.505508	0.238639	0.0743068	317.4	0.259344	0.0746732	0.0205295	317.4	0.210195	0.0684364	0.0275369
317.6	0.981889	0.429803	0.163788	387.6	0.316841	0.148229	0.0540553	325.2	0.594316	0.184718	0.0559839	317.6	0.505487	0.238287	0.0740107	317.6	0.259584	0.0746935	0.0204803	317.6	0.210385	0.0684977	0.0275899
317.8	0.982362	0.430153	0.163903	387.8	0.316698	0.148249	0.0548703	325.4	0.595107	0.184834	0.0562438	317.8	0.50609	0.238778	0.0740191	317.8	0.259785	0.0748297	0.020939	317.8	0.210349	0.0685974	0.0279088
318	0.982146	0.431159	0.163944	388	0.316708	0.148152	0.0550622	325.6	0.595595	0.184921	0.0557824	318	0.506498	0.239167	0.0739535	318	0.259848	0.0747302	0.0206791	318	0.210354	0.0678973	0.0276244
318.2	0.982971	0.431919	0.164046	388.2	0.316706	0.14818	0.0549828	325.8	0.596237	0.185399	0.0561301	318.2	0.506386	0.239081	0.0734862	318.2	0.259636	0.0744214	0.0207133	318.2	0.210569	0.0679901	0.0272973
318.4	0.983265	0.432624	0.164835	388.4	0.315885	0.147486	0.0543855	326	0.596607	0.185605	0.0562085	318.4	0.506441	0.238996	0.0729096	318.4	0.260558	0.0746185	0.020781	318.4	0.210197	0.0679542	0.0273251
318.6	0.984056	0.433277	0.165258	388.6	0.31567	0.147385	0.0544909	326.2	0.597087	0.185489	0.0560546	318.6	0.50722	0.238927	0.0728838	318.6	0.26113	0.0750306	0.0216383	318.6	0.209429	0.0672443	0.0263776
318.8	0.9848	0.433471	0.165591	388.8	0.315936	0.148006	0.0548899	326.4	0.597244	0.185526	0.0562218	318.8	0.507495	0.239127	0.0720711	318.8	0.261734	0.0755616	0.0217118	318.8	0.209046	0.0668948	0.0259074
319	0.985499	0.433749	0.165714	389	0.315477	0.148144	0.055082	326.6	0.597184	0.185239	0.0559242	319	0.508571	0.239415	0.0725323	319	0.262262	0.0762029	0.0213348	319	0.208316	0.0671013	0.0255989
319.2	0.986092	0.434194	0.166235	389.2	0.315467	0.148085	0.055449	326.8	0.597149	0.184691	0.0554081	319.2	0.509778	0.239794	0.0728527	319.2	0.262579	0.0770236	0.020682	319.2	0.207581	0.0669098	0.025269
319.4	0.986732	0.435129	0.166473	389.4	0.31546	0.148568	0.0556055	327	0.597274	0.184634	0.0553818	319.4	0.510091	0.240062	0.0730016	319.4	0.262197	0.0771943	0.0199877	319.4	0.207534	0.0671332	0.0252631
319.6	0.987021	0.435666	0.166366	389.6	0.315782	0.149231	0.0554786	327.2	0.598487	0.185064	0.0557715	319.6	0.510321	0.240013	0.0724404	319.6	0.262308	0.0774225	0.019671	319.6	0.206854	0.0668918	0.0249145
319.8	0.987712	0.435672	0.166391	389.8	0.316258	0.15022	0.0559295	327.4	0.599169	0.185203	0.0561389	319.8	0.511016	0.240582	0.0728646	319.8	0.262798	0.0781702	0.0196802	319.8	0.206503	0.0664358	0.0245405
320	0.988116	0.435858	0.165915	390	0.316584	0.150702	0.0563475	327.6	0.599836	0.185402	0.055766	320	0.510965	0.240825	0.0729166	320	0.262596	0.0786111	0.0191577	320	0.205966	0.0659068	0.0244541
320.2	0.989041	0.435854	0.165662	390.2	0.316251	0.150148	0.0555971	327.8	0.600055	0.185358	0.0552719	320.2	0.510952	0.241177	0.0723771	320.2	0.262695	0.0793019	0.0184704	320.2	0.206212	0.0661996	0.0245963
320.4	0.990446	0.436364	0.166014	390.4	0.316784	0.149794	0.0555641	328	0.600251	0.185255	0.0548288	320.4	0.511644	0.241486	0.0727702	320.4	0.262501	0.0792134	0.0179231	320.4	0.206575	0.0659392	0.0246922
320.6	0.991066	0.435806	0.165676	390.6	0.317261	0.149445	0.0551376	328.2	0.600533	0.186057	0.0548573	320.6	0.511896	0.242262	0.0735089	320.6	0.262975	0.0790101	0.0174585	320.6	0.206427	0.0651606	0.0244408
320.8	0.992109	0.436505	0.165784	390.8	0.317517	0.149202	0.0551488	328.4	0.600917	0.186022	0.0548271	320.8	0.512181	0.242459	0.0739835	320.8	0.263505	0.0790201	0.0170743	320.8	0.206736	0.0649885	0.0245815
321	0.992993	0.436291	0.166062	391	0.317926	0.148995	0.0550112	328.6	0.601386	0.186618	0.0548271	321	0.512607	0.243056	0.0743247	321	0.264106	0.0784107	0.0168205	321	0.206614	0.0642357	0.023859
321.2	0.993759	0.436216	0.16624	391.2	0.317619	0.148269	0.0540251	328.8	0.602214	0.187084	0.0545905	321.2	0.512394	0.242856	0.0741029	321.2	0.265093	0.0781672	0.0169399	321.2	0.207294	0.0651251	0.0236808
321.4	0.994052	0.436123	0.166187	391.4	0.31745	0.147942	0.0539618	329	0.603314	0.187584	0.055028	321.4	0.513008	0.242554	0.0736625	321.4	0.265601	0.0782205	0.016988	321.4	0.207084	0.0651735	0.0239442
321.6	0.994879	0.436716	0.166506	391.6	0.317313	0.147602	0.0536124	329.2	0.603827	0.188112	0.0548838	321.6	0.513496	0.242638	0.0739225	321.6	0.266518	0.0787218	0.0175707	321.6	0.207437	0.0656838	0.0241334
321.8	0.995373	0.43697	0.166453	391.8	0.317299	0.147545	0.0537685	329.4	0.604752	0.188329	0.0550667	321.8	0.514022	0.243304	0.074275	321.8	0.266931	0.0786837	0.0173502	321.8	0.208	0.0662579	0.0245274
322	0.995509	0.437279	0.166618	392	0.317236	0.147429	0.0532936	329.6	0.604977	0.188802	0.0547618	322	0.513742	0.243487	0.0740797	322	0.267338	0.0787085	0.0171471	322	0.208339	0.0663435	0.02474
322.2	0.996384	0.437773	0.167174	392.2	0.317522	0.147555	0.053888	329.8	0.605754	0.188627	0.055356	322.2	0.513727	0.244028	0.0738236	322.2	0.267677	0.0781302	0.0172634	322.2	0.208972	0.0669813	0.0252116
322.4	0.996117	0.437792	0.166721	392.4	0.317327	0.147659	0.0536612	330	0.606412	0.189201	0.0554643	322.4	0.514089	0.244279	0.0744198	322.4	0.268808	0.0784443	0.0177787	322.4	0.209148	0.0671105	0.0255569
322.6	0.996931	0.438536	0.166985	392.6	0.318138	0.148003	0.0538543	330.2	0.606538	0.188752	0.0556184	322.6	0.514625	0.24464	0.0747465	322.6	0.269292	0.0795312	0.0190734	322.6	0.208822	0.0669913	0.0251777
322.8	0.997434	0.439029	0.167231	392.8	0.318161	0.148313	0.0538397	330.4	0.60655	0.188338	0.0552641	322.8	0.515	0.245565	0.0743903	322.8	0.269592	0.0797028	0.0192476	322.8	0.209038	0.0673098	0.0256157
323	0.997789	0.43918	0.166964	393	0.317953	0.148519	0.0539094	330.6	0.607846	0.18877	0.0559639	323	0.515766	0.246028	0.0745616	323	0.269477	0.0799269	0.019766	323	0.208905	0.0677387	0.0258307
323.2	0.997775	0.439753	0.166942	393.2	0.318631	0.149089	0.0543958	330.8	0.60864	0.188941	0.0563026	323.2	0.516178	0.246712	0.074581	323.2	0.269736	0.080169	0.0198571	323.2	0.208897	0.0679238	0.0259239
323.4	0.998482	0.440337	0.167133	393.4	0.319213	0.149738	0.0545072	331	0.609267	0.189037	0.0567314	323.4	0.516293	0.24686	0.0746746	323.4	0.270015	0.0798624	0.019638	323.4	0.209128	0.0681498	0.0264947
323.6	0.999133	0.440844	0.167398	393.6	0.319999	0.150747	0.0553616	331.2	0.609664	0.188806	0.0566361	323.6	0.516874	0.247317	0.0743076	323.6	0.270812	0.0804043	0.0201569	323.6	0.209112	0.0683391	0.0270851
323.8	0.999627	0.440818	0.167341	393.8	0.319924	0.151142	0.0555524	331.4	0.609976	0.188763	0.0564212	323.8	0.516987	0.247675	0.0748608	323.8	0.271078	0.0804293	0.0202781	323.8	0.208714	0.0680195	0.0271939
324	1.0004	0.441461	0.167853	394	0.32044	0.151397	0.0562071	331.6	0.610618	0.188704	0.0561601	324	0.51685	0.24825	0.0745982	324	0.271008	0.0802292	0.0197481	324	0.208788	0.0681746	0.0276475
324.2	1.00144	0.44204	0.168571	394.2	0.320551	0.150722	0.0553373	331.8	0.610985	0.188453	0.0561173	324.2	0.51724	0.24819	0.0746602	324.2	0.270418	0.0799255	0.0190301	324.2	0.20826	0.0676758	0.0275674
324.4	1.00208	0.442222	0.168852	394.4	0.321017	0.150447	0.0557679	332	0.611612	0.188845	0.0564771	324.4	0.518082	0.248709	0.0753575	324.4	0.269811	0.079177	0.0188455	324.4	0.207666	0.0670772	0.0271959
324.6	1.00235	0.442449	0.169133	394.6	0.321492	0.150952	0.0558494	332.2	0.612141	0.189732	0.0564417	324.6	0.518785	0.249596	0.0762216	324.6	0.270211	0.0794065	0.018752	324.6	0.207112	0.0662217	0.0266001
324.8	1.00346	0.443122	0.170103	394.8	0.321867	0.150976	0.0564799	332.4	0.612796	0.189884	0.0566032	324.8	0.51945	0.249569	0.0759621	324.8	0.270783	0.0799936	0.019325	324.8	0.2069	0.066232	0.0259852
325	1.00384	0.443366	0.170469	395	0.322159	0.150988	0.0562204	332.6	0.613481	0.190635	0.0569296	325	0.5199	0.249146	0.0758845	325	0.271245	0.0797061	0.0192889	325	0.206824	0.066281	0.0254015
325.2	1.00453	0.443841	0.170749	395.2	0.321811	0.150493	0.0560958	332.8	0.613671	0.190281	0.0565304	325.2	0.520453	0.249093	0.0757932	325.2	0.271724	0.0800346	0.0195375	325.2	0.20668	0.0665671	0.0250242
325.4	1.00463	0.443656	0.170797	395.4	0.321883	0.150672	0.0567397	333	0.61438	0.190479	0.0566817	325.4	0.52121	0.249262	0.0759485	325.4	0.271717	0.0802372	0.0191591	325.4	0.206744	0.0664636	0.0252043
325.6	1.00561	0.444036	0.171256	395.6	0.322189	0.151391	0.0570897	333.2	0.615351	0.19145	0.0569474	325.6	0.521638	0.24982	0.076643	325.6	0.272271	0.0805309	0.0196883	325.6	0.207025	0.0669244	0.0249945
325.8	1.00638	0.444568	0.171692	395.8	0.322224	0.151813	0.0577772	333.4	0.616177	0.19145	0.0573959	325.8	0.522104	0.250781	0.076819	325.8	0.272768	0.0807712	0.0197957	325.8	0.207843	0.0672952	0.0252713
326	1.00674	0.44425	0.171816	396	0.322129	0.151513	0.05776	333.6	0.616911	0.191677	0.057581	326	0.522616	0.251091	0.0770008	326	0.272921	0.0807514	0.0199764	326	0.207856	0.0673109	0.0250698
326.2	1.00726	0.444294	0.171938	396.2	0.32222	0.15186	0.0578365	333.8	0.617688	0.191494	0.0578843	326.2	0.523442	0.252051	0.0776725	326.2	0.27304	0.0809172	0.0203248	326.2	0.208757	0.0677938	0.0254287
326.4	1.00759	0.444273	0.171609	396.4	0.321879	0.152044	0.057371	334	0.617471	0.191772	0.0573692	326.4	0.523946	0.252255	0.0783164	326.4	0.274298	0.0821319	0.0214132	326.4	0.20899	0.0680097	0.0254535
326.6	1.00759	0.44485	0.171626	396.6	0.322286	0.152572	0.0578148	334.2	0.61785	0.191993	0.0574152	326.6	0.524829	0.252844	0.077887	326.6	0.275324	0.0829819	0.0224755	326.6	0.209039	0.0680357	0.0255015
326.8	1.00793	0.444814	0.171562	396.8	0.321669	0.152463	0.0580594	334.4	0.618481	0.192497	0.0572568	326.8	0.525395	0.25342	0.0776464	326.8	0.275289	0.0830656	0.0224197	326.8	0.209423	0.0683368	0.025778
327	1.00792	0.444751	0.171438	397	0.321519	0.1522	0.0577124	334.6	0.619734	0.193678	0.0577782	327	0.5257	0.253495	0.0778915	327	0.275704	0.0832692	0.0225981	327	0.209128	0.0681706	0.0254046
327.2	1.00811	0.444982	0.17124	397.2	0.321315	0.152346	0.0574202	334.8	0.619659	0.194086	0.0576759	327.2	0.526486	0.254021	0.0783814	327.2	0.276461	0.0835392	0.0225674	327.2	0.209019	0.0687092	0.025546
327.4	1.00914	0.445514	0.171436	397.4	0.321375	0.152491	0.0571067	335	0.619597	0.193821	0.0571578	327.4	0.527266	0.254237	0.0783762	327.4	0.27695	0.0835441	0.0223468	327.4	0.208895	0.0686751	0.0256941
327.6	1.00876	0.445632	0.170758	397.6	0.321288	0.153033	0.0572877	335.2	0.619241	0.193944	0.0564622	327.6	0.527071	0.254191	0.0777006	327.6	0.277733	0.0842632	0.0227581	327.6	0.209328	0.0692519	0.0261871
327.8	1.00859	0.445867	0.169958	397.8	0.320587	0.152029	0.0564157	335.4	0.619578	0.194693	0.0565938	327.8	0.527125	0.253843	0.0776138	327.8	0.27789	0.0835424	0.0225196	327.8	0.209415	0.0690911	0.0257728
328	1.00904	0.4466	0.170331	398	0.32102	0.15218	0.0566707	335.6	0.62055	0.195611	0.0570793	328	0.527424	0.254212	0.0775663	328	0.278261	0.0837385	0.0226888	328	0.209402	0.0691631	0.0259468
328.2	1.00901	0.446654	0.170119	398.2	0.320862	0.15188	0.0558377	335.8	0.620606	0.196008	0.0570092	328.2	0.528204	0.254115	0.0774309	328.2	0.278106	0.0836956	0.0222044	328.2	0.208785	0.0688275	0.0257242
328.4	1.00946	0.446969	0.169884	398.4	0.320787	0.152071	0.0563728	336	0.620481	0.19607	0.0566772	328.4	0.528667	0.254572	0.0776247	328.4	0.27796	0.0835518	0.0220131	328.4	0.209025	0.0691698	0.0263445
328.6	1.00981	0.447621	0.170284	398.6	0.32118	0.152046	0.0561447	336.2	0.620909	0.19624	0.0565333	328.6	0.528475	0.254917	0.0771712	328.6	0.279068	0.0842539	0.0220875	328.6	0.208935	0.0687267	0.0259033
328.8	1.01093	0.447926	0.170812	398.8	0.321177	0.15115	0.0556908	336.4	0.621345	0.19594	0.0569558	328.8	0.528312	0.254321	0.0764376	328.8	0.279491	0.0843266	0.0221028	328.8	0.20947	0.0687449	0.0259008
329	1.01154	0.447975	0.170699	399	0.321269	0.150821	0.0554677	336.6	0.621574	0.195996	0.0568364	329	0.528137	0.254467	0.0764952	329	0.280137	0.084462	0.0218203	329	0.209546	0.0685586	0.0261527
329.2	1.01226	0.448255	0.170842	399.2	0.321112	0.150482	0.0555108	336.8	0.621481	0.195868	0.0566089	329.2	0.528964	0.255275	0.0771153	329.2	0.280048	0.084241	0.0216384	329.2	0.209248	0.0680974	0.0258505
329.4	1.01332	0.448542	0.171439	399.4	0.321556	0.151097	0.0553894	337	0.622491	0.196122	0.0571032	329.4	0.52938	0.255939	0.0774896	329.4	0.280795	0.0849763	0.0220127	329.4	0.209643	0.0686694	0.0263865
329.6	1.01491	0.448871	0.172046	399.6	0.321712	0.151379	0.0554055	337.2	0.623805	0.196819	0.0574577	329.6	0.530134	0.256295	0.0783367	329.6	0.281349	0.0845262	0.0217744	329.6	0.209911	0.0684021	0.0264614
329.8	1.01622	0.449286	0.172952	399.8	0.322174	0.151089	0.0553035	337.4	0.624285	0.196665	0.05777	329.8	0.531041	0.257341	0.0791401	329.8	0.281637	0.0845641	0.0217544	329.8	0.209707	0.0681385	0.0265416
330	1.01711	0.449076	0.172983	400	0.322401	0.150975	0.0547455	337.6	0.625191	0.197439	0.0581576	330	0.531782	0.257737	0.0795052	330	0.28175	0.0840743	0.0213264	330	0.209166	0.0677881	0.0263618
330.2	1.01829	0.449687	0.173448	400.2	0.323024	0.151434	0.0551366	337.8	0.625304	0.197166	0.057618	330.2	0.532458	0.258508	0.0800179	330.2	0.282322	0.0842884	0.0210742	330.2	0.209161	0.0676201	0.026988
330.4	1.01938	0.450537	0.173976	400.4	0.323686	0.151528	0.0558789	338	0.625724	0.197802	0.0576743	330.4	0.532625	0.258012	0.0797664	330.4	0.28255	0.0843282	0.0205778	330.4	0.208727	0.0673451	0.0268111
330.6	1.01969	0.450928	0.174455	400.6	0.32386	0.151699	0.056088	338.2	0.626848	0.198503	0.0584725	330.6	0.533615	0.258339	0.0798882	330.6	0.282688	0.0841595	0.0208775	330.6	0.208085	0.0672471	0.026774
330.8	1.02092	0.451562	0.174837	400.8	0.323867	0.151292	0.0562857	338.4	0.627245	0.198674	0.0584638	330.8	0.534272	0.259159	0.0804624	330.8	0.28266	0.0845142	0.0211057	330.8	0.207915	0.0671104	0.0264566
331	1.0209	0.451605	0.174708	401	0.324713	0.151843	0.0566357	338.6	0.628211	0.199334	0.0586177	331	0.534503	0.259874	0.0812564	331	0.283049	0.0844922	0.0212354	331	0.207378	0.0670907	0.026353
331.2	1.02098	0.451767	0.174349	401.2	0.324529	0.152096	0.0570705	338.8	0.628701	0.199302	0.0587746	331.2	0.534965	0.26069	0.0815219	331.2	0.283311	0.0841074	0.0213677	331.2	0.206854	0.0668941	0.0262681
331.4	1.02117	0.452833	0.174744	401.4	0.32499	0.152549	0.0574002	339	0.628751	0.198763	0.0583012	331.4	0.535153	0.260552	0.0808897	331.4	0.283483	0.0836739	0.0216219	331.4	0.206983	0.0661918	0.0264103
331.6	1.02099	0.453388	0.174923	401.6	0.32461	0.152643	0.0576386	339.2	0.629122	0.199022	0.0584538	331.6	0.534746	0.260822	0.0805671	331.6	0.284093	0.0837501	0.0220737	331.6	0.207332	0.0658813	0.026149
331.8	1.0214	0.453942	0.175921	401.8	0.32432	0.152493	0.0579249	339.4	0.62976	0.199216	0.0590016	331.8	0.53513	0.26134	0.0804973	331.8	0.284119	0.0833446	0.0223454	331.8	0.207244	0.0659322	0.0259899
332	1.02161	0.45385	0.176002	402	0.32433	0.152742	0.058387	339.6	0.630963	0.199589	0.0594369	332	0.535374	0.26193	0.0805958	332	0.284497	0.0837903	0.0224822	332	0.20736	0.0656445	0.0259821
332.2	1.02186	0.453925	0.176227	402.2	0.324288	0.152606	0.0576917	339.8	0.63136	0.199465	0.0597686	332.2	0.535698	0.26244	0.0805198	332.2	0.284546	0.0835987	0.022028	332.2	0.207812	0.065466	0.0259195
332.4	1.02231	0.454414	0.176898	402.4	0.324283	0.152135	0.0573421	340	0.632033	0.199727	0.0599828	332.4	0.535554	0.262332	0.0803897	332.4	0.284974	0.0840002	0.0221759	332.4	0.207942	0.0657163	0.0263623
332.6	1.02281	0.454665	0.177307	402.6	0.324581	0.151485	0.0566639	340.2	0.633068	0.199877	0.0606075	332.6	0.535506	0.262053	0.0798908	332.6	0.28572	0.0849702	0.0229613	332.6	0.208005	0.0656319	0.0257099
332.8	1.0238	0.454906	0.177728	402.8	0.324654	0.151347	0.0558748	340.4	0.633032	0.200128	0.0609671	332.8	0.536043	0.261973	0.0802429	332.8	0.286241	0.0853195	0.0236866	332.8	0.208635	0.0662682	0.0261352
333	1.0241	0.455306	0.178214	403	0.324492	0.151547	0.0555345	340.6	0.632855	0.199927	0.0603869	333	0.536797	0.262401	0.0811352	333	0.287191	0.0864825	0.0242625	333	0.208462	0.0663372	0.0257577
333.2	1.02456	0.455989	0.178582	403.2	0.324331	0.15165	0.0549778	340.8	0.633843	0.200277	0.061205	333.2	0.537737	0.262406	0.0817556	333.2	0.287366	0.0863692	0.024009	333.2	0.208493	0.066131	0.0255862
333.4	1.02567	0.456421	0.179116	403.4	0.324554	0.152073	0.0544448	341	0.635147	0.200932	0.0613498	333.4	0.538219	0.262449	0.082029	333.4	0.288352	0.0871984	0.0243485	333.4	0.208219	0.0662074	0.0254481
333.6	1.02619	0.456045	0.178538	403.6	0.325005	0.152092	0.0543989	341.2	0.635628	0.201491	0.061511	333.6	0.538587	0.262185	0.0821972	333.6	0.288493	0.0871317	0.0235614	333.6	0.20827	0.0659615	0.0254895
333.8	1.02646	0.456299	0.178525	403.8	0.325601	0.152414	0.054039	341.4	0.635696	0.201544	0.0612481	333.8	0.5386	0.26205	0.0818	333.8	0.288832	0.0872428	0.0233678	333.8	0.207278	0.0659549	0.0248346
334	1.02657	0.456246	0.177808	404	0.325778	0.152907	0.054064	341.6	0.636198	0.20195	0.0614938	334	0.539018	0.261751	0.0814118	334	0.288877	0.087194	0.0225984	334	0.207111	0.0665913	0.0249981
334.2	1.02666	0.456546	0.177757	404.2	0.326292	0.15351	0.0548332	341.8	0.636406	0.201508	0.0611597	334.2	0.539046	0.261382	0.0809062	334.2	0.288591	0.0868929	0.0219116	334.2	0.206763	0.0670185	0.0254271
334.4	1.02679	0.456911	0.178029	404.4	0.32621	0.15393	0.054696	342	0.636768	0.202085	0.0613565	334.4	0.539197	0.261341	0.0806977	334.4	0.288635	0.087114	0.0217571	334.4	0.206684	0.0674359	0.0251927
334.6	1.02697	0.456994	0.177853	404.6	0.326498	0.154661	0.0552409	342.2	0.636648	0.201756	0.0609263	334.6	0.539836	0.262013	0.0807674	334.6	0.288509	0.086674	0.0217739	334.6	0.206526	0.0680723	0.0252648
334.8	1.02768	0.457609	0.177455	404.8	0.326667	0.154736	0.0558428	342.4	0.636758	0.201608	0.0603893	334.8	0.539922	0.262677	0.0806687	334.8	0.289088	0.0866236	0.0217011	334.8	0.206617	0.0683442	0.0255863
335	1.02739	0.457296	0.17686	405	0.326854	0.154826	0.0559594	342.6	0.637174	0.201098	0.0602434	335	0.5399	0.262953	0.0809127	335	0.289277	0.0860354	0.0211636	335	0.206526	0.0686347	0.0256721
335.2	1.02779	0.457438	0.176934	405.2	0.325808	0.154265	0.0558698	342.8	0.63691	0.20024	0.0600303	335.2	0.539519	0.263148	0.0803444	335.2	0.289895	0.0856304	0.0210662	335.2	0.206376	0.068285	0.0256863
335.4	1.02816	0.457887	0.177016	405.4	0.326253	0.154985	0.056516	343	0.636873	0.199848	0.0595444	335.4	0.539425	0.26266	0.079792	335.4	0.289807	0.0856973	0.0209795	335.4	0.206495	0.0682517	0.0257445
335.6	1.02861	0.458152	0.177313	405.6	0.326278	0.154527	0.0565824	343.2	0.637502	0.200159	0.0599883	335.6	0.539596	0.263461	0.079786	335.6	0.290412	0.0855821	0.0210402	335.6	0.205928	0.067945	0.0249689
335.8	1.029	0.457799	0.177441	405.8	0.326051	0.154147	0.0567164	343.4	0.637687	0.200101	0.0602961	335.8	0.540505	0.264171	0.0803257	335.8	0.290468	0.0853211	0.0207607	335.8	0.206044	0.0678179	0.0247784
336	1.02897	0.457819	0.176798	406	0.326348	0.15329	0.0568127	343.6	0.637989	0.200465	0.0604685	336	0.54093	0.26416	0.0806132	336	0.290762	0.0850018	0.0208004	336	0.206307	0.0675852	0.0245404
336.2	1.0298	0.458459	0.177363	406.2	0.326635	0.152865	0.0563459	343.8	0.638693	0.201081	0.0610553	336.2	0.541183	0.264758	0.0807115	336.2	0.290824	0.0851595	0.0210213	336.2	0.206075	0.0673701	0.0242388
336.4	1.03078	0.459199	0.178025	406.4	0.327234	0.152931	0.0564146	344	0.638777	0.201558	0.0610823	336.4	0.541731	0.26499	0.0810589	336.4	0.291371	0.0856762	0.0214756	336.4	0.205834	0.0672505	0.0241704
336.6	1.03138	0.459485	0.177709	406.6	0.327554	0.152824	0.0566078	344.2	0.639175	0.202154	0.0613385	336.6	0.542376	0.265618	0.0816622	336.6	0.291733	0.0855819	0.0221931	336.6	0.205982	0.0667664	0.0237482
336.8	1.03229	0.460241	0.178333	406.8	0.327458	0.152957	0.0567596	344.4	0.63954	0.202495	0.0615372	336.8	0.54331	0.266301	0.0823564	336.8	0.292659	0.0856963	0.0231173	336.8	0.206207	0.0663644	0.024224
337	1.03302	0.460657	0.178627	407	0.327179	0.152632	0.0568384	344.6	0.64033	0.20263	0.0613319	337	0.543689	0.266591	0.0826621	337	0.292924	0.0863805	0.0230169	337	0.206365	0.0656084	0.0238206
337.2	1.03352	0.460601	0.178476	407.2	0.327085	0.152666	0.0571648	344.8	0.641623	0.203243	0.0619669	337.2	0.544107	0.266766	0.0827663	337.2	0.293419	0.0862541	0.023211	337.2	0.206356	0.0650572	0.0242768
337.4	1.0338	0.460567	0.177969	407.4	0.32756	0.152934	0.0574282	345	0.642322	0.203875	0.0616843	337.4	0.544879	0.267117	0.0830401	337.4	0.29385	0.0875395	0.0235379	337.4	0.206549	0.0653464	0.0245472
337.6	1.03373	0.460249	0.177299	407.6	0.328298	0.153182	0.0575729	345.2	0.642627	0.203933	0.0614068	337.6	0.544842	0.266986	0.082974	337.6	0.294016	0.0876919	0.0233479	337.6	0.206863	0.0658668	0.0251433
337.8	1.03408	0.460514	0.177709	407.8	0.328512	0.153644	0.0579537	345.4	0.642629	0.203678	0.0606951	337.8	0.544597	0.266963	0.0828945	337.8	0.295073	0.087483	0.0231719	337.8	0.206863	0.0660234	0.0252998
338	1.03457	0.460471	0.17777	408	0.328534	0.154221	0.0585238	345.6	0.642902	0.203841	0.0604931	338	0.545576	0.267451	0.0834889	338	0.294817	0.0876555	0.022532	338	0.207234	0.0665992	0.0261777
338.2	1.03505	0.460928	0.178288	408.2	0.328331	0.154434	0.0582996	345.8	0.643249	0.204009	0.0599997	338.2	0.545782	0.267859	0.0835351	338.2	0.29457	0.0872949	0.0217114	338.2	0.207218	0.0664379	0.0258998
338.4	1.03591	0.46104	0.178428	408.4	0.328169	0.154369	0.0583522	346	0.644052	0.204955	0.0603584	338.4	0.546309	0.268355	0.0842426	338.4	0.295026	0.0877861	0.0213013	338.4	0.207664	0.0670171	0.0261469
338.6	1.03713	0.461558	0.178717	408.6	0.328519	0.155059	0.0588832	346.2	0.644858	0.205092	0.0601784	338.6	0.546402	0.268632	0.0839604	338.6	0.295166	0.0873483	0.0206192	338.6	0.207471	0.0670556	0.0264618
338.8	1.0378	0.461709	0.178518	408.8	0.328227	0.155138	0.0586382	346.4	0.64565	0.205266	0.0602851	338.8	0.546717	0.268822	0.0842227	338.8	0.296202	0.0877078	0.0204781	338.8	0.207656	0.067162	0.0266906
339	1.03792	0.461344	0.17827	409	0.328459	0.15518	0.058479	346.6	0.646047	0.205392	0.0605765	339	0.546789	0.268789	0.083986	339	0.296442	0.0879939	0.0199863	339	0.208011	0.0672678	0.0267522
339.2	1.03822	0.461058	0.178439	409.2	0.327901	0.155225	0.058382	346.8	0.645917	0.20525	0.0602406	339.2	0.547033	0.268857	0.0841932	339.2	0.297197	0.0880172	0.0198489	339.2	0.207852	0.0673332	0.0267387
339.4	1.03844	0.461353	0.178621	409.4	0.32883	0.155764	0.0588481	347	0.646056	0.205409	0.0598878	339.4	0.547351	0.26829	0.0840496	339.4	0.297641	0.0877554	0.0198401	339.4	0.207688	0.0679998	0.0262862
339.6	1.03877	0.461724	0.179333	409.6	0.329446	0.155635	0.0590189	347.2	0.646055	0.20495	0.0603856	339.6	0.547892	0.268858	0.0841476	339.6	0.298008	0.0872005	0.0200627	339.6	0.206937	0.0679973	0.0256467
339.8	1.03903	0.461796	0.179979	409.8	0.329186	0.155333	0.0589594	347.4	0.646298	0.204647	0.060599	339.8	0.548521	0.26936	0.0842401	339.8	0.29788	0.0870985	0.0196249	339.8	0.207395	0.0681344	0.0256069
340	1.03911	0.462455	0.180518	410	0.329685	0.154982	0.059152	347.6	0.646397	0.204648	0.060776	340	0.548774	0.269195	0.0838124	340	0.298021	0.087588	0.0198189	340	0.207238	0.0684429	0.0253956
340.2	1.03982	0.462743	0.180831	410.2	0.329854	0.155672	0.0588397	347.8	0.647146	0.205357	0.0613465	340.2	0.549217	0.269985	0.0840106	340.2	0.297928	0.0879984	0.0197094	340.2	0.206892	0.0681097	0.0249897
340.4	1.04073	0.463496	0.180944	410.4	0.330122	0.155978	0.0586236	348	0.647368	0.205411	0.0612328	340.4	0.54964	0.27078	0.0841291	340.4	0.298445	0.0880323	0.0201354	340.4	0.207096	0.0679815	0.0246836
340.6	1.04172	0.46391	0.18088	410.6	0.330001	0.155695	0.0582943	348.2	0.647726	0.205623	0.0615313	340.6	0.550182	0.271577	0.0843919	340.6	0.298706	0.0881973	0.0206395	340.6	0.20701	0.0679191	0.0248146
340.8	1.0425	0.464712	0.181699	410.8	0.330083	0.155172	0.0582036	348.4	0.647848	0.205377	0.0615557	340.8	0.550505	0.271913	0.0842696	340.8	0.299082	0.088492	0.0209174	340.8	0.207428	0.0676947	0.0250687
341	1.04285	0.464758	0.181308	411	0.329776	0.154976	0.0583931	348.6	0.647829	0.20519	0.0612074	341	0.551185	0.272731	0.0843397	341	0.299183	0.0887147	0.0211975	341	0.207836	0.0677367	0.0246989
341.2	1.04341	0.465158	0.181512	411.2	0.330019	0.155077	0.0584931	348.8	0.648251	0.204844	0.0611252	341.2	0.551739	0.273472	0.0846384	341.2	0.29914	0.0884463	0.0218183	341.2	0.207909	0.0677125	0.0251728
341.4	1.04365	0.465846	0.181625	411.4	0.330103	0.155244	0.0583096	349	0.648425	0.205017	0.060902	341.4	0.552148	0.274084	0.0848061	341.4	0.299246	0.0891241	0.0219412	341.4	0.208649	0.0684779	0.025725
341.6	1.0442	0.466051	0.181729	411.6	0.330387	0.155465	0.0583169	349.2	0.648441	0.20483	0.0602851	341.6	0.551874	0.274214	0.0847456	341.6	0.299741	0.0888694	0.0220138	341.6	0.208708	0.0680346	0.0256106
341.8	1.04482	0.46653	0.182263	411.8	0.330219	0.155585	0.0580548	349.4	0.648326	0.204824	0.0598812	341.8	0.552044	0.274599	0.0846762	341.8	0.300652	0.0892036	0.0223503	341.8	0.209177	0.0680072	0.02587
342	1.04537	0.466754	0.182097	412	0.33012	0.155779	0.0577481	349.6	0.648772	0.205568	0.0601696	342	0.552307	0.27469	0.0844253	342	0.299996	0.0889521	0.0218072	342	0.209012	0.0677173	0.0256054
342.2	1.04641	0.467519	0.182332	412.2	0.330211	0.156284	0.0576861	349.8	0.649749	0.206127	0.0606181	342.2	0.552176	0.274989	0.0844403	342.2	0.300715	0.089055	0.0220281	342.2	0.208381	0.067407	0.025282
342.4	1.04693	0.46782	0.181666	412.4	0.330182	0.156407	0.0580915	350	0.650797	0.206968	0.0615868	342.4	0.552499	0.275533	0.084998	342.4	0.301869	0.0893266	0.0220297	342.4	0.208083	0.0672128	0.0257975
342.6	1.0478	0.469059	0.182259	412.6	0.33062	0.157299	0.0580921	350.2	0.651367	0.207741	0.0615658	342.6	0.552457	0.275781	0.0848008	342.6	0.302417	0.089242	0.0223975	342.6	0.207659	0.0663859	0.0256824
342.8	1.048	0.469088	0.181985	412.8	0.331089	0.157705	0.0581919	350.4	0.651087	0.207845	0.0612935	342.8	0.553092	0.275925	0.0846533	342.8	0.302932	0.0895184	0.0227892	342.8	0.207888	0.0662005	0.0257172
343	1.04823	0.469523	0.18223	413	0.331112	0.157176	0.0585	350.6	0.651091	0.208179	0.0613618	343	0.553376	0.276147	0.0846924	343	0.303919	0.0899348	0.0238678	343	0.207661	0.0657683	0.0254468
343.2	1.04883	0.470054	0.182753	413.2	0.331662	0.157426	0.0591055	350.8	0.650974	0.208029	0.0611155	343.2	0.553463	0.276189	0.0853342	343.2	0.305208	0.0897992	0.0244553	343.2	0.207213	0.0658912	0.0248553
343.4	1.04944	0.470704	0.183073	413.4	0.332233	0.15728	0.0591061	351	0.651242	0.208044	0.0611136	343.4	0.552892	0.275553	0.0848571	343.4	0.305557	0.0897234	0.0243971	343.4	0.207399	0.0659703	0.0244352
343.6	1.04986	0.471289	0.183413	413.6	0.33271	0.157187	0.0594485	351.2	0.651989	0.208119	0.0615762	343.6	0.552609	0.275159	0.084642	343.6	0.306284	0.0907174	0.0248209	343.6	0.207109	0.0661128	0.0241356
343.8	1.05003	0.471989	0.184161	413.8	0.332243	0.156422	0.0588847	351.4	0.653323	0.208989	0.0622318	343.8	0.553324	0.274706	0.0843971	343.8	0.306552	0.0909433	0.0244997	343.8	0.207502	0.0659286	0.0242645
344	1.05	0.472261	0.184378	414	0.33273	0.156609	0.0588922	351.6	0.65325	0.209233	0.0623601	344	0.55399	0.274643	0.0847282	344	0.3067	0.0911693	0.0245439	344	0.207578	0.0662129	0.024066
344.2	1.05052	0.47269	0.184175	414.2	0.332919	0.157188	0.0589296	351.8	0.653939	0.209475	0.0626949	344.2	0.553853	0.274377	0.0845427	344.2	0.306792	0.0911219	0.0247501	344.2	0.207579	0.0661446	0.0239049
344.4	1.05105	0.472651	0.183696	414.4	0.332991	0.156724	0.0583551	352	0.654448	0.209237	0.0627643	344.4	0.55389	0.274844	0.0845118	344.4	0.307006	0.0912157	0.0244959	344.4	0.208294	0.0666119	0.024017
344.6	1.05147	0.472847	0.183794	414.6	0.333247	0.156575	0.0578824	352.2	0.654143	0.20895	0.0626501	344.6	0.554308	0.274529	0.0845743	344.6	0.306964	0.0914356	0.0243702	344.6	0.208306	0.0662349	0.024138
344.8	1.05114	0.47287	0.183939	414.8	0.333506	0.156244	0.0582934	352.4	0.654181	0.208663	0.0624452	344.8	0.554501	0.274504	0.0846376	344.8	0.307226	0.0911625	0.0247583	344.8	0.209181	0.0667494	0.0244373
345	1.0512	0.473035	0.183662	415	0.3338	0.156984	0.0586535	352.6	0.654315	0.208501	0.0621127	345	0.554926	0.274835	0.0846988	345	0.307143	0.0909834	0.0248374	345	0.209112	0.0670694	0.0244555
345.2	1.05193	0.473473	0.184251	415.2	0.33371	0.157336	0.0583473	352.8	0.65464	0.208324	0.0617385	345.2	0.555114	0.274872	0.084462	345.2	0.306399	0.0906841	0.0242984	345.2	0.208661	0.0669023	0.0246704
345.4	1.05187	0.473571	0.184128	415.4	0.333637	0.15764	0.0585829	353	0.654459	0.20822	0.0614022	345.4	0.555776	0.274563	0.0844198	345.4	0.306574	0.090864	0.0240135	345.4	0.209455	0.0677561	0.0253713
345.6	1.05215	0.473061	0.183398	415.6	0.333653	0.157587	0.0585609	353.2	0.655091	0.208197	0.061396	345.6	0.556225	0.274414	0.0841202	345.6	0.306711	0.0908006	0.02371	345.6	0.209271	0.0672083	0.0251181
345.8	1.05233	0.47283	0.183433	415.8	0.333317	0.157768	0.0584371	353.4	0.655881	0.208344	0.0614614	345.8	0.556814	0.274611	0.0840409	345.8	0.306915	0.0906316	0.0236975	345.8	0.209323	0.0674903	0.0255562
346	1.05262	0.473152	0.183363	416	0.333408	0.158031	0.0588881	353.6	0.656779	0.208658	0.0623433	346	0.557054	0.275077	0.0840302	346	0.307119	0.0906899	0.023551	346	0.208723	0.0676298	0.0254854
346.2	1.05325	0.473595	0.18351	416.2	0.33354	0.158487	0.0596363	353.8	0.658036	0.208694	0.0629077	346.2	0.558358	0.276286	0.0848184	346.2	0.307878	0.090956	0.0239216	346.2	0.20775	0.0672759	0.0254145
346.4	1.05373	0.474129	0.183741	416.4	0.333341	0.157367	0.059521	354	0.658572	0.209189	0.0634096	346.4	0.55878	0.276636	0.0848056	346.4	0.30773	0.0907121	0.0228484	346.4	0.207107	0.0666265	0.0251063
346.6	1.05476	0.474415	0.184451	416.6	0.333378	0.157216	0.0597978	354.2	0.65899	0.209977	0.0632647	346.6	0.558988	0.277117	0.0851038	346.6	0.307682	0.0911638	0.0229526	346.6	0.206849	0.0666058	0.0251879
346.8	1.05492	0.474204	0.184344	416.8	0.333263	0.157083	0.0600463	354.4	0.658965	0.209754	0.0628618	346.8	0.559132	0.277685	0.0844673	346.8	0.308108	0.0914204	0.0230015	346.8	0.206427	0.0664194	0.0251581
347	1.05507	0.474308	0.184365	417	0.333719	0.156975	0.0609612	354.6	0.659904	0.210557	0.0635258	347	0.559415	0.278283	0.0851275	347	0.308689	0.0920133	0.0231481	347	0.205867	0.0660182	0.0247324
347.2	1.056	0.474847	0.184504	417.2	0.334028	0.157122	0.060848	354.8	0.660151	0.210728	0.0634689	347.2	0.559179	0.278441	0.0850732	347.2	0.309461	0.0926464	0.0232932	347.2	0.205924	0.0662845	0.0247735
347.4	1.05646	0.475221	0.184814	417.4	0.333579	0.156537	0.0597993	355	0.660575	0.211293	0.0638655	347.4	0.559228	0.27862	0.0850327	347.4	0.309792	0.0931677	0.0232994	347.4	0.206194	0.0664445	0.0246408
347.6	1.05673	0.475848	0.185209	417.6	0.333476	0.156061	0.0598688	355.2	0.660697	0.211639	0.0638702	347.6	0.559562	0.278986	0.0850515	347.6	0.310529	0.0943448	0.0236689	347.6	0.206397	0.0667553	0.024958
347.8	1.05697	0.476209	0.186087	417.8	0.333328	0.15613	0.0596788	355.4	0.660712	0.212045	0.0643248	347.8	0.560214	0.279557	0.0854122	347.8	0.310528	0.0941345	0.0234342	347.8	0.206677	0.0661797	0.0248625
348	1.05711	0.476164	0.186257	418	0.333573	0.15657	0.0599719	355.6	0.660298	0.211782	0.063993	348	0.560455	0.280554	0.0857162	348	0.31043	0.0938529	0.0235305	348	0.207276	0.0662691	0.0247249
348.2	1.05761	0.476658	0.186322	418.2	0.333643	0.155994	0.0596366	355.8	0.660654	0.211908	0.0642696	348.2	0.560611	0.281368	0.0852999	348.2	0.31138	0.0940357	0.023646	348.2	0.207243	0.0661334	0.0248493
348.4	1.05828	0.476449	0.185854	418.4	0.333216	0.155491	0.0583953	356	0.660619	0.212199	0.0641219	348.4	0.561216	0.28192	0.0860295	348.4	0.312141	0.094507	0.0238529	348.4	0.207919	0.0664076	0.0248626
348.6	1.05864	0.476592	0.186203	418.6	0.332933	0.155491	0.0583156	356.2	0.660205	0.212334	0.0636773	348.6	0.561324	0.281928	0.0861848	348.6	0.312573	0.0945882	0.0242005	348.6	0.207899	0.0663454	0.0251642
348.8	1.05913	0.476569	0.186053	418.8	0.33326	0.155838	0.0590152	356.4	0.660141	0.212484	0.0637404	348.8	0.561789	0.282722	0.0868471	348.8	0.31297	0.0940973	0.0244525	348.8	0.208604	0.0670366	0.0256584
349	1.0593	0.476354	0.185919	419	0.333508	0.156444	0.0590684	356.6	0.660347	0.212692	0.0636257	349	0.562239	0.283317	0.0871006	349	0.313425	0.0943689	0.0245125	349	0.208419	0.0667072	0.0256371
349.2	1.0597	0.475819	0.185889	419.2	0.333225	0.156234	0.0590479	356.8	0.660531	0.21284	0.0634796	349.2	0.563288	0.283472	0.0872847	349.2	0.313205	0.0941188	0.0243231	349.2	0.208882	0.0665567	0.0258725
349.4	1.05963	0.475537	0.185861	419.4	0.333574	0.156187	0.0595092	357	0.66106	0.213494	0.063392	349.4	0.564435	0.283758	0.0878061	349.4	0.313531	0.0938283	0.0242863	349.4	0.209552	0.0667989	0.0260349
349.6	1.05987	0.475572	0.185555	419.6	0.332952	0.155865	0.0593082	357.2	0.661914	0.213706	0.063973	349.6	0.565163	0.284367	0.0884297	349.6	0.313953	0.0939423	0.0244315	349.6	0.209046	0.0660706	0.0259188
349.8	1.05982	0.475431	0.185986	419.8	0.3328	0.156164	0.0595808	357.4	0.662462	0.213683	0.0641965	349.8	0.566125	0.284836	0.0888621	349.8	0.313886	0.0933044	0.0245243	349.8	0.209024	0.0661448	0.0260685
350	1.05992	0.475751	0.186311	420	0.333162	0.156166	0.0598917	357.6	0.663422	0.214171	0.0648857	350	0.566601	0.285545	0.0893746	350	0.313983	0.0932252	0.0245035	350	0.208033	0.0656689	0.0248557
350.2	1.06012	0.475889	0.186564	420.2	0.333314	0.155737	0.0599267	357.8	0.664057	0.213839	0.0648046	350.2	0.566832	0.2857	0.0892581	350.2	0.313999	0.092944	0.0241354	350.2	0.207184	0.0648565	0.0242877
350.4	1.06057	0.476398	0.187157	420.4	0.333217	0.155335	0.059492	358	0.664794	0.213994	0.0646575	350.4	0.56712	0.28589	0.0897416	350.4	0.314393	0.0929482	0.0238509	350.4	0.206597	0.0644707	0.0236292
350.6	1.06066	0.476521	0.186626	420.6	0.333552	0.156068	0.0597922	358.2	0.66535	0.213652	0.0644878	350.6	0.567366	0.286731	0.0901028	350.6	0.315054	0.0933176	0.0240076	350.6	0.206665	0.0648312	0.023969
350.8	1.06052	0.476567	0.186397	420.8	0.334156	0.156735	0.0597595	358.4	0.665565	0.213447	0.0648207	350.8	0.567332	0.286689	0.0893669	350.8	0.315357	0.093047	0.023942	350.8	0.206079	0.0645664	0.0234249
351	1.06144	0.477459	0.186855	421	0.335095	0.157372	0.0599982	358.6	0.666532	0.213805	0.0648349	351	0.567627	0.286664	0.089569	351	0.315612	0.0936168	0.0240678	351	0.205967	0.0646918	0.0233459
351.2	1.06218	0.478539	0.187543	421.2	0.334847	0.157969	0.0594317	358.8	0.666824	0.213444	0.0648412	351.2	0.567545	0.286454	0.0894388	351.2	0.316292	0.0937089	0.0244771	351.2	0.20607	0.0650193	0.0234845
351.4	1.06281	0.479231	0.187909	421.4	0.335464	0.158508	0.0595501	359	0.666407	0.213134	0.0645628	351.4	0.567772	0.286581	0.0895044	351.4	0.315944	0.0931584	0.0236146	351.4	0.205458	0.0647232	0.0228667
351.6	1.06334	0.480181	0.188012	421.6	0.335678	0.158859	0.0599392	359.2	0.666476	0.212899	0.0640474	351.6	0.567919	0.286895	0.0897946	351.6	0.316238	0.0934075	0.0237318	351.6	0.205465	0.0645389	0.0228872
351.8	1.06452	0.480921	0.188995	421.8	0.335865	0.159358	0.0599692	359.4	0.667038	0.213209	0.0638808	351.8	0.567509	0.286691	0.089755	351.8	0.316839	0.0932138	0.023878	351.8	0.205131	0.0641806	0.0220828
352	1.06494	0.481285	0.189028	422	0.335796	0.159181	0.0594951	359.6	0.667673	0.213235	0.0640836	352	0.567833	0.287422	0.0897024	352	0.316697	0.0922464	0.0235313	352	0.204962	0.0644536	0.0218
352.2	1.06588	0.48187	0.188915	422.2	0.335386	0.158752	0.0590014	359.8	0.668207	0.213747	0.0644802	352.2	0.568539	0.288229	0.0898469	352.2	0.317555	0.0922626	0.023957	352.2	0.204612	0.0650177	0.0217942
352.4	1.06647	0.481712	0.188986	422.4	0.334972	0.158786	0.0586468	360	0.668396	0.213939	0.0646233	352.4	0.568168	0.287751	0.0901349	352.4	0.31829	0.0925762	0.0248819	352.4	0.204954	0.0652412	0.02216
352.6	1.06687	0.481523	0.189036	422.6	0.334782	0.159092	0.0591024	360.2	0.66853	0.214242	0.0646036	352.6	0.567963	0.2879	0.0897772	352.6	0.318034	0.09242	0.0245649	352.6	0.205227	0.0654311	0.0230102
352.8	1.06745	0.481289	0.189329	422.8	0.335256	0.158884	0.0590712	360.4	0.668909	0.214187	0.0647329	352.8	0.568645	0.288208	0.0899219	352.8	0.318137	0.0924496	0.0246585	352.8	0.205647	0.0655596	0.0232846
353	1.06747	0.481226	0.189728	423	0.335306	0.158377	0.0588207	360.6	0.669287	0.214608	0.0647372	353	0.56949	0.288074	0.0899214	353	0.318326	0.0928504	0.0250025	353	0.205712	0.0653829	0.0235182
353.2	1.06802	0.481244	0.189591	423.2	0.335494	0.158311	0.0589123	360.8	0.669013	0.214804	0.0644082	353.2	0.569902	0.288089	0.0903269	353.2	0.318493	0.0929973	0.0249441	353.2	0.205991	0.0656	0.0241786
353.4	1.06832	0.481388	0.189652	423.4	0.335489	0.158099	0.058683	361	0.669292	0.215416	0.0648342	353.4	0.570059	0.287883	0.0903361	353.4	0.318337	0.0932137	0.0248893	353.4	0.205992	0.0660149	0.0243349
353.6	1.06868	0.481569	0.189786	423.6	0.335335	0.157892	0.0586968	361.2	0.668995	0.21533	0.0652662	353.6	0.570873	0.288605	0.0912241	353.6	0.318686	0.0934623	0.0256598	353.6	0.205848	0.0659322	0.0249126
353.8	1.06873	0.481355	0.19001	423.8	0.335621	0.15762	0.0584547	361.4	0.669164	0.215272	0.0653171	353.8	0.570824	0.288215	0.0906384	353.8	0.318743	0.093644	0.0257401	353.8	0.206311	0.0658781	0.0248525
354	1.0687	0.481779	0.190463	424	0.335989	0.157234	0.058333	361.6	0.669811	0.215609	0.0654378	354	0.571262	0.288269	0.0905982	354	0.319218	0.0942317	0.0261096	354	0.206038	0.0654893	0.024488
354.2	1.06882	0.482163	0.190449	424.2	0.33628	0.157073	0.0589111	361.8	0.670199	0.215505	0.0658551	354.2	0.572019	0.288854	0.0907255	354.2	0.320275	0.0950859	0.0269294	354.2	0.206458	0.0658559	0.0251127
354.4	1.069	0.482326	0.190175	424.4	0.336922	0.1574	0.0594792	362	0.670604	0.215738	0.0659034	354.4	0.572628	0.289305	0.0915131	354.4	0.320936	0.0956825	0.0268302	354.4	0.206761	0.0658315	0.025174
354.6	1.06893	0.482571	0.189681	424.6	0.337374	0.157662	0.0595493	362.2	0.670886	0.215659	0.0668546	354.6	0.572565	0.289289	0.0911108	354.6	0.321128	0.0965103	0.026043	354.6	0.207073	0.0660583	0.0253971
354.8	1.06949	0.48304	0.189991	424.8	0.337482	0.157631	0.0597085	362.4	0.671075	0.216279	0.0670092	354.8	0.572796	0.288623	0.0909929	354.8	0.321223	0.0967026	0.0259515	354.8	0.207024	0.0660294	0.0251957
355	1.07008	0.484149	0.190235	425	0.33754	0.157766	0.0600466	362.6	0.671554	0.216462	0.0668137	355	0.572716	0.288416	0.0909932	355	0.321635	0.0970759	0.0256568	355	0.207327	0.0661467	0.0253653
355.2	1.06991	0.484324	0.190126	425.2	0.33782	0.158418	0.0604179	362.8	0.671821	0.216246	0.0673867	355.2	0.572589	0.288377	0.0914243	355.2	0.321842	0.0971681	0.0252508	355.2	0.207606	0.0664473	0.0255694
355.4	1.07036	0.484586	0.189478	425.4	0.338756	0.158811	0.0609263	363	0.671873	0.216369	0.0671007	355.4	0.572447	0.288574	0.0915707	355.4	0.322223	0.09712	0.0248557	355.4	0.207363	0.0660272	0.0250362
355.6	1.07046	0.484666	0.189325	425.6	0.337812	0.158578	0.0606301	363.2	0.672721	0.216835	0.0674302	355.6	0.572554	0.288988	0.0918926	355.6	0.323325	0.0975032	0.0255035	355.6	0.207607	0.0663563	0.0247824
355.8	1.07089	0.484431	0.189598	425.8	0.337666	0.158753	0.0607768	363.4	0.673191	0.217602	0.0677463	355.8	0.572907	0.289383	0.0919459	355.8	0.323925	0.0978015	0.0254235	355.8	0.207449	0.0662222	0.0243269
356	1.07117	0.484312	0.189456	426	0.337435	0.158666	0.0605312	363.6	0.673851	0.21844	0.068714	356	0.573577	0.290876	0.0924857	356	0.323871	0.0971532	0.0254572	356	0.206633	0.0666046	0.0240343
356.2	1.07231	0.484897	0.189701	426.2	0.337466	0.159247	0.0608246	363.8	0.674797	0.219279	0.068602	356.2	0.574141	0.29106	0.0928039	356.2	0.324807	0.0972693	0.0254187	356.2	0.207253	0.0670451	0.0246129
356.4	1.07263	0.485168	0.189928	426.4	0.338183	0.160094	0.0608132	364	0.675252	0.220056	0.0686915	356.4	0.574514	0.291713	0.0935893	356.4	0.325328	0.0969951	0.025035	356.4	0.207634	0.0669084	0.0251215
356.6	1.07313	0.485348	0.190235	426.6	0.338486	0.160967	0.061191	364.2	0.675837	0.220455	0.0683488	356.6	0.575439	0.292034	0.093835	356.6	0.32502	0.0967613	0.0241248	356.6	0.20763	0.0668572	0.0249538
356.8	1.07372	0.485627	0.190816	426.8	0.339274	0.161097	0.0613303	364.4	0.676197	0.22026	0.0681833	356.8	0.576479	0.292575	0.0943039	356.8	0.325186	0.0966558	0.0241841	356.8	0.207345	0.0665344	0.0247407
357	1.07438	0.4861	0.191049	427	0.339644	0.161512	0.0612421	364.6	0.676257	0.220316	0.0680344	357	0.576766	0.292376	0.0945054	357	0.325262	0.0967799	0.0239689	357	0.207056	0.0661333	0.0249059
357.2	1.07518	0.486293	0.19105	427.2	0.340335	0.162062	0.0609206	364.8	0.676526	0.220574	0.0678394	357.2	0.576872	0.293039	0.0948739	357.2	0.325985	0.0972544	0.0241663	357.2	0.206942	0.0663219	0.0251068
357.4	1.07518	0.486351	0.191685	427.4	0.340384	0.161752	0.0606059	365	0.677578	0.221292	0.0681534	357.4	0.577598	0.293134	0.094823	357.4	0.325616	0.0972406	0.0242195	357.4	0.207049	0.066756	0.0254899
357.6	1.07558	0.486549	0.192172	427.6	0.340303	0.161846	0.0607914	365.2	0.677876	0.22116	0.0679093	357.6	0.578785	0.294048	0.0954864	357.6	0.325887	0.0971975	0.024121	357.6	0.207139	0.0662754	0.0259547
357.8	1.07609	0.487153	0.192809	427.8	0.340218	0.161473	0.0606281	365.4	0.678428	0.221562	0.0675644	357.8	0.579201	0.293893	0.0950356	357.8	0.326012	0.0973618	0.0237499	357.8	0.207389	0.0659599	0.0260468
358	1.07635	0.48783	0.193141	428	0.34002	0.161488	0.0610368	365.6	0.678534	0.221664	0.0677301	358	0.579822	0.294318	0.095069	358	0.325849	0.0974272	0.023861	358	0.207112	0.0662118	0.026408
358.2	1.07648	0.488055	0.193249	428.2	0.34035	0.161209	0.0614787	365.8	0.678458	0.22161	0.067807	358.2	0.580083	0.295382	0.0953744	358.2	0.326286	0.0979201	0.0243969	358.2	0.206591	0.0662617	0.0266372
358.4	1.0766	0.488236	0.193381	428.4	0.340463	0.160512	0.0607891	366	0.67855	0.221204	0.0672987	358.4	0.579932	0.29531	0.0954239	358.4	0.326147	0.0981036	0.0237643	358.4	0.206616	0.0662866	0.0263867
358.6	1.07665	0.489028	0.193847	428.6	0.339808	0.159937	0.0603139	366.2	0.679191	0.221181	0.0674422	358.6	0.579776	0.295143	0.0949157	358.6	0.325934	0.0985539	0.0238012	358.6	0.206023	0.0662322	0.0258686
358.8	1.07677	0.48976	0.193778	428.8	0.339282	0.158759	0.0600037	366.4	0.678787	0.220434	0.0665975	358.8	0.579942	0.295316	0.0945791	358.8	0.325933	0.0985685	0.0240251	358.8	0.205963	0.0664003	0.025708
359	1.0769	0.489908	0.193655	429	0.339064	0.158841	0.0600065	366.6	0.679197	0.220077	0.066885	359	0.579704	0.295563	0.0942977	359	0.326297	0.09873	0.0240066	359	0.205854	0.066182	0.0254362
359.2	1.07732	0.490184	0.19368	429.2	0.339039	0.158395	0.0594416	366.8	0.679587	0.219342	0.0670186	359.2	0.579769	0.296022	0.0941449	359.2	0.325969	0.0989826	0.0238768	359.2	0.205974	0.0662128	0.0258178
359.4	1.07762	0.489842	0.193033	429.4	0.33916	0.158278	0.0592454	367	0.679652	0.219793	0.0671919	359.4	0.579594	0.295991	0.0936427	359.4	0.326506	0.0991696	0.0243345	359.4	0.20565	0.0656178	0.0254057
359.6	1.07822	0.490023	0.193491	429.6	0.338623	0.158145	0.0587958	367.2	0.679557	0.219571	0.0672806	359.6	0.57951	0.295981	0.0933679	359.6	0.327198	0.0992521	0.0247871	359.6	0.205899	0.0658672	0.0253283
359.8	1.07892	0.490373	0.193926	429.8	0.339089	0.158476	0.05895	367.4	0.680128	0.219522	0.0675525	359.8	0.5801	0.296381	0.0934678	359.8	0.326819	0.0992719	0.0244349	359.8	0.205865	0.0661673	0.0255146
360	1.07963	0.490855	0.194223	430	0.339134	0.158267	0.0583273	367.6	0.680034	0.219727	0.067525	360	0.58013	0.296738	0.0939148	360	0.326555	0.0985725	0.0245563	360	0.206119	0.0665075	0.0257563
360.2	1.08001	0.491492	0.194108	430.2	0.340009	0.159083	0.0586174	367.8	0.680472	0.220204	0.0675747	360.2	0.580519	0.29631	0.0942119	360.2	0.327308	0.09839	0.0244023	360.2	0.207226	0.0663839	0.0263508
360.4	1.07991	0.491337	0.194045	430.4	0.340599	0.159587	0.0588711	368	0.680321	0.220048	0.0675431	360.4	0.580931	0.296979	0.0947793	360.4	0.326935	0.097736	0.0241127	360.4	0.20717	0.066165	0.0263303
360.6	1.08039	0.491381	0.194271	430.6	0.341368	0.16	0.0594111	368.2	0.680419	0.220046	0.0675639	360.6	0.581345	0.296949	0.0948905	360.6	0.326947	0.0976802	0.0243048	360.6	0.207194	0.0660714	0.0263683
360.8	1.08075	0.491631	0.194239	430.8	0.341815	0.160416	0.0595819	368.4	0.680145	0.219818	0.0673465	360.8	0.581292	0.297002	0.0951243	360.8	0.327675	0.0977693	0.024848	360.8	0.207507	0.0663081	0.0266985
361	1.08106	0.491895	0.194241	431	0.341943	0.160696	0.0591708	368.6	0.680611	0.220024	0.0676223	361	0.581125	0.296792	0.0950234	361	0.32836	0.0983452	0.0250331	361	0.208126	0.0662327	0.0268464
361.2	1.08183	0.491733	0.194302	431.2	0.341977	0.160636	0.0591421	368.8	0.681083	0.220752	0.0676561	361.2	0.582274	0.297452	0.0956023	361.2	0.328995	0.0983591	0.0255607	361.2	0.208682	0.0665501	0.0272107
361.4	1.08214	0.491377	0.19484	431.4	0.341864	0.160575	0.0597779	369	0.681681	0.221239	0.0677603	361.4	0.582837	0.297808	0.0959682	361.4	0.328961	0.0981066	0.0254902	361.4	0.20917	0.0671852	0.0277577
361.6	1.08248	0.490904	0.19499	431.6	0.341542	0.160294	0.0598079	369.2	0.682123	0.22177	0.0682324	361.6	0.583129	0.298275	0.0963499	361.6	0.329485	0.0983261	0.0251903	361.6	0.209044	0.0669084	0.0274624
361.8	1.0833	0.491178	0.195373	431.8	0.341781	0.159684	0.0599517	369.4	0.682348	0.222788	0.0683123	361.8	0.583553	0.298394	0.0964204	361.8	0.330109	0.0981627	0.0255996	361.8	0.209129	0.0671375	0.0271157
362	1.08346	0.491121	0.195314	432	0.341865	0.159265	0.0598907	369.6	0.683087	0.223144	0.0688283	362	0.583527	0.298428	0.0964469	362	0.330551	0.0984127	0.0260201	362	0.208816	0.0676471	0.0271584
362.2	1.08337	0.490388	0.195406	432.2	0.341793	0.158642	0.0594612	369.8	0.683894	0.223508	0.0685611	362.2	0.584097	0.299245	0.0966542	362.2	0.331379	0.0985905	0.0263214	362.2	0.208483	0.067459	0.0265187
362.4	1.08396	0.490633	0.195208	432.4	0.341634	0.158127	0.0591935	370	0.68494	0.223731	0.0685418	362.4	0.584356	0.299157	0.0967836	362.4	0.331281	0.0990134	0.0259958	362.4	0.208305	0.0677117	0.0260523
362.6	1.08425	0.490988	0.195287	432.6	0.341127	0.157832	0.0592035	370.2	0.685929	0.224096	0.0687418	362.6	0.584513	0.299272	0.0961654	362.6	0.331757	0.100003	0.026358	362.6	0.20765	0.0671851	0.0255032
362.8	1.08447	0.490992	0.19504	432.8	0.340929	0.157617	0.0588773	370.4	0.68612	0.224032	0.0690951	362.8	0.584898	0.299785	0.0960183	362.8	0.332144	0.100165	0.0261832	362.8	0.207304	0.0665261	0.0248559
363	1.0855	0.490933	0.195175	433	0.340629	0.157859	0.0587867	370.6	0.687079	0.224797	0.0693421	363	0.58453	0.299683	0.0955879	363	0.332931	0.100831	0.0262093	363	0.207281	0.0662616	0.0252325
363.2	1.08565	0.491092	0.195104	433.2	0.340701	0.157594	0.058457	370.8	0.687069	0.224499	0.0691216	363.2	0.584481	0.300061	0.0955631	363.2	0.332691	0.101175	0.0261127	363.2	0.207553	0.0661267	0.0256425
363.4	1.08633	0.491566	0.194975	433.4	0.34121	0.157963	0.0584494	371	0.687371	0.224722	0.0692413	363.4	0.583737	0.299282	0.0946054	363.4	0.333135	0.101111	0.025973	363.4	0.207596	0.0662611	0.0256377
363.6	1.08686	0.492409	0.195763	433.6	0.340463	0.157945	0.0583103	371.2	0.687867	0.223895	0.0687009	363.6	0.583435	0.298954	0.0942249	363.6	0.332658	0.100989	0.0256934	363.6	0.207738	0.0665331	0.0254875
363.8	1.08692	0.492638	0.195938	433.8	0.340074	0.157637	0.0581738	371.4	0.687869	0.223697	0.0686201	363.8	0.583783	0.299278	0.0945109	363.8	0.331955	0.101112	0.0252866	363.8	0.207783	0.0663637	0.0259959
364	1.08677	0.493139	0.195825	434	0.340058	0.157628	0.058016	371.6	0.687344	0.223784	0.0677813	364	0.583835	0.299215	0.0945767	364	0.332196	0.101085	0.0254687	364	0.207391	0.0661416	0.0257362
364.2	1.08702	0.493757	0.195825	434.2	0.34002	0.157635	0.0584196	371.8	0.687472	0.223795	0.0674435	364.2	0.583933	0.299093	0.094641	364.2	0.332865	0.101241	0.025562	364.2	0.207364	0.0658738	0.0258952
364.4	1.08722	0.493928	0.195495	434.4	0.339807	0.157763	0.0584131	372	0.687777	0.223354	0.0672596	364.4	0.584253	0.300028	0.0948442	364.4	0.332522	0.101268	0.0254562	364.4	0.207085	0.0655795	0.0255158
364.6	1.0875	0.494449	0.195739	434.6	0.340254	0.158525	0.0588171	372.2	0.687824	0.223481	0.0673773	364.6	0.584524	0.300336	0.0947284	364.6	0.333047	0.101618	0.0257486	364.6	0.207078	0.0654519	0.0252394
364.8	1.08784	0.494862	0.195867	434.8	0.340626	0.159538	0.0598371	372.4	0.687431	0.222993	0.0665354	364.8	0.584451	0.300579	0.094763	364.8	0.333722	0.101955	0.0260432	364.8	0.207354	0.0650677	0.0251194
365	1.08854	0.495613	0.196482	435	0.340591	0.159659	0.0598294	372.6	0.687944	0.223098	0.066718	365	0.584664	0.300661	0.0943983	365	0.334059	0.102438	0.0262937	365	0.207528	0.0646247	0.0249307
365.2	1.08918	0.495402	0.197139	435.2	0.340536	0.15969	0.0600057	372.8	0.688047	0.223208	0.0666966	365.2	0.584688	0.301359	0.0944575	365.2	0.334447	0.101961	0.0262215	365.2	0.207579	0.0649877	0.0250823
365.4	1.0893	0.495353	0.197589	435.4	0.34122	0.159518	0.0609856	373	0.688387	0.223052	0.0669266	365.4	0.584539	0.301264	0.0945968	365.4	0.334859	0.101715	0.0256884	365.4	0.207494	0.0649833	0.0245536
365.6	1.08958	0.495732	0.197542	435.6	0.341829	0.159276	0.060855	373.2	0.688508	0.223213	0.0671157	365.6	0.584834	0.301209	0.0949593	365.6	0.335452	0.101652	0.025553	365.6	0.207109	0.0650223	0.0244327
365.8	1.09026	0.496248	0.19752	435.8	0.342785	0.159299	0.0609207	373.4	0.688895	0.223989	0.0675048	365.8	0.585614	0.301607	0.0955852	365.8	0.335417	0.100827	0.0250426	365.8	0.207398	0.0652094	0.0246476
366	1.09024	0.496198	0.197421	436	0.342795	0.15976	0.0606525	373.6	0.689715	0.224236	0.0681529	366	0.585951	0.301835	0.0961317	366	0.335513	0.100245	0.0248708	366	0.207043	0.0649041	0.0248266
366.2	1.09058	0.496156	0.197716	436.2	0.342892	0.16015	0.0600108	373.8	0.690112	0.224145	0.0683026	366.2	0.586156	0.302166	0.0961232	366.2	0.336255	0.100626	0.0250639	366.2	0.206949	0.0650694	0.0246575
366.4	1.09109	0.496781	0.197517	436.4	0.343477	0.16071	0.0599007	374	0.690388	0.224562	0.069052	366.4	0.585941	0.30198	0.0960736	366.4	0.336202	0.100695	0.0253261	366.4	0.206788	0.0652864	0.025454
366.6	1.09108	0.496617	0.19736	436.6	0.34367	0.160725	0.0597831	374.2	0.69102	0.225019	0.0693465	366.6	0.585996	0.302142	0.0960814	366.6	0.336955	0.100959	0.0257866	366.6	0.206791	0.0655023	0.0255891
366.8	1.09146	0.49675	0.197401	436.8	0.343972	0.160618	0.0597614	374.4	0.690851	0.22574	0.0695085	366.8	0.586083	0.302253	0.0965499	366.8	0.337592	0.100908	0.0256527	366.8	0.206519	0.0654607	0.026082
367	1.09256	0.497226	0.19766	437	0.343894	0.160221	0.0594358	374.6	0.691327	0.226445	0.0694359	367	0.586325	0.302868	0.0966759	367	0.338545	0.10148	0.0260404	367	0.207134	0.0664692	0.0272814
367.2	1.09294	0.497646	0.197548	437.2	0.344239	0.160612	0.0590125	374.8	0.691453	0.226495	0.0693948	367.2	0.586504	0.303185	0.0968073	367.2	0.338628	0.101444	0.026192	367.2	0.207812	0.067288	0.0280072
367.4	1.09387	0.49844	0.197922	437.4	0.344001	0.160617	0.0587379	375	0.692049	0.227088	0.0701187	367.4	0.586249	0.303063	0.096187	367.4	0.338831	0.101336	0.0259479	367.4	0.207723	0.0678118	0.0281765
367.6	1.09392	0.498581	0.197842	437.6	0.343806	0.160601	0.0588224	375.2	0.692698	0.227492	0.0702298	367.6	0.586654	0.303751	0.0966394	367.6	0.338968	0.101761	0.0263507	367.6	0.207647	0.0678734	0.0279218
367.8	1.0939	0.498439	0.197285	437.8	0.343708	0.160477	0.0585683	375.4	0.692662	0.228091	0.0705056	367.8	0.586982	0.303899	0.097245	367.8	0.34011	0.102105	0.0264551	367.8	0.207565	0.0674703	0.0276592
368	1.09388	0.498486	0.197193	438	0.343916	0.160806	0.058946	375.6	0.692935	0.228144	0.0697984	368	0.58724	0.303478	0.0970528	368	0.340316	0.102749	0.0262757	368	0.207079	0.0677122	0.0265302
368.2	1.09454	0.499021	0.197482	438.2	0.343975	0.160953	0.0593855	375.8	0.693462	0.22846	0.06984	368.2	0.587608	0.303909	0.0972406	368.2	0.340661	0.103128	0.0266305	368.2	0.206987	0.067626	0.0263972
368.4	1.09483	0.499151	0.197132	438.4	0.344366	0.161235	0.0599175	376	0.69417	0.228699	0.0704757	368.4	0.588248	0.304949	0.0976749	368.4	0.340849	0.103641	0.0270167	368.4	0.206356	0.067058	0.0252515
368.6	1.09452	0.499294	0.197575	438.6	0.344501	0.161484	0.0604627	376.2	0.694318	0.228687	0.0702436	368.6	0.588321	0.304564	0.0971928	368.6	0.340925	0.103814	0.0269157	368.6	0.206488	0.0670048	0.0248697
368.8	1.09461	0.499698	0.197777	438.8	0.344508	0.161448	0.0610525	376.4	0.694085	0.228012	0.0695807	368.8	0.589175	0.305303	0.0977711	368.8	0.341671	0.104463	0.0272194	368.8	0.206287	0.066615	0.0249439
369	1.09462	0.500149	0.198553	439	0.3433	0.160442	0.0605446	376.6	0.694948	0.22811	0.0699706	369	0.589532	0.305071	0.0973493	369	0.342678	0.104899	0.0278722	369	0.206269	0.0666116	0.0244066
369.2	1.09504	0.500144	0.198793	439.2	0.343095	0.160419	0.0609876	376.8	0.695145	0.227952	0.0701933	369.2	0.589873	0.30581	0.09756	369.2	0.343053	0.104612	0.0273185	369.2	0.20583	0.066018	0.0240615
369.4	1.09512	0.500431	0.199099	439.4	0.34319	0.159845	0.0612807	377	0.695095	0.227603	0.069671	369.4	0.590513	0.305212	0.0972667	369.4	0.342844	0.104163	0.026972	369.4	0.20549	0.0656768	0.0237167
369.6	1.09516	0.500939	0.199303	439.6	0.342546	0.159474	0.0606048	377.2	0.695083	0.228006	0.0697184	369.6	0.590652	0.305264	0.0972238	369.6	0.342891	0.104369	0.0273509	369.6	0.204924	0.0653436	0.0237174
369.8	1.09536	0.500719	0.199854	439.8	0.342164	0.1592	0.0601826	377.4	0.695316	0.227734	0.0697197	369.8	0.591644	0.305748	0.0975035	369.8	0.342369	0.103994	0.0271346	369.8	0.204712	0.0646876	0.0235481
370	1.0957	0.500797	0.20033	440	0.341782	0.15962	0.0600251	377.6	0.695231	0.227109	0.0698117	370	0.591723	0.3057	0.0973481	370	0.342135	0.103675	0.027251	370	0.204804	0.0644418	0.0237837
370.2	1.09576	0.500603	0.200432	440.2	0.341734	0.159367	0.0599463	377.8	0.695173	0.226944	0.0695843	370.2	0.592066	0.30615	0.0969855	370.2	0.342427	0.103918	0.0272712	370.2	0.205136	0.0645088	0.0239925
370.4	1.09615	0.500732	0.20028	440.4	0.341641	0.158922	0.0599562	378	0.694903	0.227075	0.0695269	370.4	0.592107	0.306474	0.0971666	370.4	0.342056	0.103246	0.0275355	370.4	0.20505	0.0647703	0.0245864
370.6	1.09647	0.50082	0.200439	440.6	0.341816	0.158257	0.059945	378.2	0.695287	0.227533	0.0693895	370.6	0.592838	0.307023	0.0977617	370.6	0.342795	0.103599	0.0278695	370.6	0.205179	0.0650326	0.0246345
370.8	1.09784	0.501419	0.200941	440.8	0.341877	0.157909	0.0595088	378.4	0.695162	0.227557	0.0696985	370.8	0.593252	0.307098	0.0973265	370.8	0.343826	0.103961	0.028281	370.8	0.205558	0.0649971	0.0254049
371	1.0992	0.502034	0.201508	441	0.342366	0.158279	0.0593051	378.6	0.695656	0.227915	0.0702548	371	0.593952	0.308591	0.0978316	371	0.344393	0.104104	0.0288468	371	0.206153	0.0657284	0.0252637
371.2	1.09952	0.502463	0.201516	441.2	0.34315	0.158931	0.0594239	378.8	0.695987	0.228096	0.070915	371.2	0.593712	0.308432	0.0972237	371.2	0.344614	0.103948	0.0288949	371.2	0.206591	0.0657995	0.0254476
371.4	1.1	0.503222	0.201584	441.4	0.343498	0.159242	0.0595214	379	0.696217	0.228692	0.0712449	371.4	0.593796	0.308384	0.0968032	371.4	0.344742	0.103852	0.0284805	371.4	0.206476	0.0659529	0.0247021
371.6	1.10031	0.503578	0.201527	441.6	0.344262	0.159675	0.0596744	379.2	0.696673	0.228659	0.0710867	371.6	0.593915	0.308667	0.0967948	371.6	0.345103	0.103845	0.0285828	371.6	0.207069	0.0662476	0.0247012
371.8	1.1001	0.503534	0.201258	441.8	0.34475	0.159852	0.0595605	379.4	0.696555	0.228624	0.0709182	371.8	0.593249	0.308125	0.0969099	371.8	0.345006	0.103768	0.0282885	371.8	0.20755	0.0662549	0.0242004
372	1.10085	0.504416	0.201431	442	0.346066	0.160339	0.0599312	379.6	0.696701	0.228569	0.07052	372	0.592919	0.307822	0.0969155	372	0.344724	0.103948	0.0279193	372	0.207555	0.0669945	0.0239542
372.2	1.10182	0.505274	0.201448	442.2	0.346728	0.160567	0.0601991	379.8	0.697008	0.228933	0.0705813	372.2	0.593056	0.307915	0.0971448	372.2	0.344885	0.103715	0.0279538	372.2	0.207462	0.0671947	0.0242593
372.4	1.10207	0.505618	0.201365	442.4	0.346795	0.160151	0.0603165	380	0.697386	0.228847	0.0707343	372.4	0.593617	0.30822	0.0978425	372.4	0.345159	0.103534	0.0282887	372.4	0.207477	0.0669468	0.0238409
372.6	1.10144	0.505655	0.200884	442.6	0.346222	0.160011	0.0597518	380.2	0.698002	0.229287	0.0705174	372.6	0.594009	0.308331	0.097928	372.6	0.344906	0.103599	0.0279868	372.6	0.207826	0.0668581	0.0240834
372.8	1.10151	0.505623	0.200727	442.8	0.346042	0.160035	0.0598238	380.4	0.697969	0.228692	0.0699204	372.8	0.594443	0.308942	0.0986264	372.8	0.345636	0.103999	0.028416	372.8	0.207911	0.0667958	0.0243487
373	1.10185	0.505635	0.200536	443	0.345776	0.159826	0.0600091	380.6	0.69882	0.229154	0.0697854	373	0.594311	0.309023	0.0986445	373	0.345932	0.103983	0.0285485	373	0.207782	0.0664677	0.0240262
373.2	1.10229	0.505994	0.20056	443.2	0.346282	0.160259	0.0604471	380.8	0.698715	0.229502	0.0693473	373.2	0.594513	0.309299	0.0991096	373.2	0.34595	0.1038	0.0280106	373.2	0.207439	0.0656673	0.0242089
373.4	1.102	0.506232	0.200191	443.4	0.345873	0.159631	0.0600246	381	0.698448	0.229091	0.0686877	373.4	0.594236	0.308628	0.0982458	373.4	0.346171	0.104356	0.0281746	373.4	0.207666	0.0655792	0.0245498
373.6	1.10156	0.505752	0.199585	443.6	0.344866	0.159226	0.0592904	381.2	0.698457	0.228721	0.0685898	373.6	0.594519	0.308881	0.0989033	373.6	0.346409	0.105179	0.0278524	373.6	0.2075	0.06498	0.0248223
373.8	1.10174	0.505456	0.199166	443.8	0.344737	0.158819	0.0592793	381.4	0.698367	0.228655	0.0681374	373.8	0.595201	0.309371	0.09964	373.8	0.346423	0.105101	0.0274326	373.8	0.207553	0.0649078	0.0251604
374	1.10186	0.505164	0.198468	444	0.344307	0.158856	0.0591921	381.6	0.698339	0.228725	0.0681769	374	0.595073	0.30936	0.0999127	374	0.346664	0.10525	0.0271961	374	0.207331	0.0645808	0.0251244
374.2	1.10156	0.504514	0.197756	444.2	0.343602	0.158112	0.0590237	381.8	0.698308	0.22868	0.0676728	374.2	0.595355	0.309883	0.100274	374.2	0.346854	0.105135	0.0272592	374.2	0.207329	0.0644727	0.0248588
374.4	1.10214	0.504776	0.197907	444.4	0.343803	0.157597	0.0586915	382	0.69815	0.228924	0.0678827	374.4	0.595623	0.310084	0.100562	374.4	0.347799	0.105649	0.0280165	374.4	0.207103	0.0646515	0.025116
374.6	1.10239	0.504952	0.198387	444.6	0.344035	0.157642	0.0588817	382.2	0.698704	0.229151	0.0681851	374.6	0.596001	0.310107	0.100399	374.6	0.348501	0.106155	0.0279953	374.6	0.206995	0.0638403	0.0251726
374.8	1.10272	0.505072	0.198898	444.8	0.344091	0.157826	0.0586927	382.4	0.699097	0.22926	0.0685747	374.8	0.596442	0.310256	0.100318	374.8	0.349311	0.106793	0.0288386	374.8	0.20697	0.0639954	0.0250244
375	1.10339	0.505553	0.199834	445	0.34458	0.157838	0.0587793	382.6	0.69869	0.229417	0.068797	375	0.597043	0.310833	0.100899	375	0.349817	0.107103	0.0291869	375	0.206835	0.0641119	0.0243544
375.2	1.10346	0.505952	0.200202	445.2	0.344829	0.158099	0.0588102	382.8	0.698681	0.229379	0.0687482	375.2	0.59746	0.310363	0.100512	375.2	0.350457	0.107123	0.0286072	375.2	0.206918	0.0641222	0.0246963
375.4	1.10409	0.506785	0.200709	445.4	0.344448	0.158294	0.0585842	383	0.699103	0.229624	0.0687933	375.4	0.597989	0.310704	0.100764	375.4	0.350505	0.10724	0.0280674	375.4	0.207244	0.0644528	0.024333
375.6	1.10421	0.506839	0.201607	445.6	0.34467	0.158432	0.0587613	383.2	0.699751	0.229597	0.069333	375.6	0.597927	0.311458	0.100833	375.6	0.350671	0.10702	0.0278195	375.6	0.208015	0.0643504	0.0242135
375.8	1.10417	0.506933	0.201929	445.8	0.345039	0.158525	0.0588978	383.4	0.700016	0.229629	0.0693604	375.8	0.59736	0.311216	0.100813	375.8	0.350749	0.107191	0.0274966	375.8	0.20822	0.064885	0.0242224
376	1.10494	0.507362	0.202567	446	0.3458	0.159148	0.0594217	383.6	0.700781	0.229872	0.069416	376	0.597631	0.311232	0.100595	376	0.351008	0.10707	0.0273538	376	0.207605	0.0649748	0.0240083
376.2	1.10512	0.507502	0.203063	446.2	0.345881	0.159656	0.0600981	383.8	0.701271	0.229976	0.0694338	376.2	0.597873	0.311151	0.100651	376.2	0.351186	0.106901	0.0274036	376.2	0.207822	0.0645878	0.0239372
376.4	1.10525	0.507889	0.203464	446.4	0.346104	0.160414	0.060358	384	0.702042	0.23023	0.0698023	376.4	0.598403	0.311708	0.100841	376.4	0.351351	0.106441	0.0273842	376.4	0.207726	0.0642558	0.0233281
376.6	1.10539	0.507848	0.20329	446.6	0.345988	0.160674	0.0602907	384.2	0.702393	0.230606	0.0698584	376.6	0.598673	0.31197	0.101327	376.6	0.350811	0.106568	0.0271724	376.6	0.20771	0.0642935	0.0235824
376.8	1.10601	0.507442	0.203208	446.8	0.34646	0.16137	0.0611548	384.4	0.702637	0.230028	0.0697229	376.8	0.598465	0.311486	0.101655	376.8	0.350958	0.10636	0.0270023	376.8	0.207971	0.0645401	0.0234414
377	1.10678	0.507786	0.202801	447	0.346997	0.161616	0.0613418	384.6	0.702625	0.229994	0.0696222	377	0.599111	0.312178	0.101746	377	0.351348	0.106186	0.0269239	377	0.20773	0.0645659	0.0234027
377.2	1.10752	0.50847	0.203374	447.2	0.347109	0.161649	0.0613034	384.8	0.702809	0.230143	0.0696935	377.2	0.599365	0.312366	0.101746	377.2	0.351141	0.106244	0.0270098	377.2	0.208156	0.0644546	0.0237702
377.4	1.1077	0.508341	0.20245	447.4	0.346273	0.161213	0.0603828	385	0.703164	0.229885	0.070336	377.4	0.599573	0.312518	0.10104	377.4	0.351125	0.106875	0.0271007	377.4	0.20821	0.0651097	0.0240128
377.6	1.10817	0.508149	0.202273	447.6	0.346018	0.161326	0.0601579	385.2	0.703255	0.229938	0.07061	377.6	0.599936	0.313318	0.101431	377.6	0.351395	0.106517	0.0270241	377.6	0.208197	0.0656478	0.0242174
377.8	1.10866	0.50842	0.202151	447.8	0.346255	0.161087	0.0603364	385.4	0.703057	0.230398	0.0707218	377.8	0.599529	0.313032	0.101301	377.8	0.351726	0.106495	0.0273905	377.8	0.207835	0.0659695	0.0241873
378	1.10918	0.508546	0.202189	448	0.346187	0.161394	0.0602141	385.6	0.703106	0.230075	0.0705402	378	0.599522	0.31324	0.101093	378	0.351576	0.106193	0.0273155	378	0.207621	0.0662553	0.0240453
378.2	1.10952	0.509061	0.202059	448.2	0.3466	0.161613	0.0605687	385.8	0.703335	0.230269	0.0706949	378.2	0.599758	0.313947	0.101273	378.2	0.352048	0.106208	0.027837	378.2	0.208101	0.0664788	0.0244397
378.4	1.10992	0.509605	0.202092	448.4	0.347296	0.161236	0.0606294	386	0.703231	0.230678	0.0710836	378.4	0.600067	0.314121	0.101217	378.4	0.35299	0.106527	0.0280452	378.4	0.207836	0.0663648	0.0248624
378.6	1.10987	0.509708	0.202071	448.6	0.347621	0.16112	0.0602077	386.2	0.70352	0.231134	0.0711036	378.6	0.600107	0.314431	0.10161	378.6	0.353135	0.106287	0.028272	378.6	0.207693	0.0662694	0.0251
378.8	1.11027	0.510373	0.202386	448.8	0.347907	0.160872	0.0596882	386.4	0.703624	0.231518	0.0712367	378.8	0.600382	0.314763	0.101904	378.8	0.353649	0.106625	0.0287879	378.8	0.207522	0.0666251	0.0248263
379	1.11086	0.510609	0.202843	449	0.348585	0.160383	0.0592989	386.6	0.703446	0.231624	0.0712192	379	0.601345	0.315232	0.102442	379	0.354053	0.106572	0.0284292	379	0.207509	0.0666014	0.0252033
379.2	1.11078	0.510947	0.202864	449.2	0.348508	0.160804	0.0595243	386.8	0.704755	0.232251	0.0717028	379.2	0.601942	0.316014	0.103024	379.2	0.354356	0.106712	0.0276154	379.2	0.207507	0.0667818	0.0261543
379.4	1.11085	0.511527	0.202973	449.4	0.347965	0.160384	0.0592094	387	0.705599	0.232718	0.0720457	379.4	0.60152	0.316218	0.102825	379.4	0.354562	0.106981	0.027583	379.4	0.207354	0.0664434	0.0256771
379.6	1.1104	0.511016	0.203177	449.6	0.347743	0.160471	0.0591382	387.2	0.705576	0.232916	0.0717369	379.6	0.601664	0.316562	0.102763	379.6	0.355081	0.107176	0.0275155	379.6	0.206899	0.0665723	0.0255397
379.8	1.1102	0.511382	0.203152	449.8	0.347624	0.160707	0.059237	387.4	0.705227	0.232533	0.0711438	379.8	0.601714	0.316182	0.102627	379.8	0.355662	0.107595	0.0276723	379.8	0.20714	0.0670514	0.0259336
380	1.11011	0.511395	0.203118	450	0.347638	0.160589	0.0590013	387.6	0.705389	0.232508	0.0710739	380	0.602048	0.316525	0.102866	380	0.355581	0.107455	0.027729	380	0.206674	0.0662368	0.0256519
380.2	1.11026	0.511472	0.202922	450.2	0.347022	0.160156	0.058556	387.8	0.705375	0.232408	0.0711182	380.2	0.602293	0.316609	0.103278	380.2	0.356158	0.107876	0.0279353	380.2	0.206787	0.0662427	0.025786
380.4	1.11046	0.51134	0.203041	450.4	0.346675	0.15988	0.0586838	388	0.70557	0.232325	0.0708865	380.4	0.603144	0.316588	0.103773	380.4	0.356422	0.108354	0.0276935	380.4	0.206066	0.0655093	0.025537
380.6	1.11085	0.511137	0.202848	450.6	0.34617	0.158908	0.0582255	388.2	0.705359	0.231499	0.0704897	380.6	0.603668	0.317098	0.104428	380.6	0.356622	0.108808	0.0280092	380.6	0.206085	0.0655153	0.0259024
380.8	1.11137	0.510648	0.202688	450.8	0.346371	0.158917	0.0583345	388.4	0.70557	0.231205	0.0702704	380.8	0.603357	0.31705	0.104131	380.8	0.35664	0.108953	0.0272826	380.8	0.206005	0.0652661	0.0252855
381	1.11159	0.510768	0.202799	451	0.346155	0.158669	0.0581332	388.6	0.705599	0.231102	0.0705003	381	0.603528	0.317715	0.10353	381	0.356919	0.108914	0.0274723	381	0.206415	0.0655102	0.025592
381.2	1.11254	0.510786	0.20381	451.2	0.345519	0.158082	0.0575708	388.8	0.705947	0.2312	0.07068	381.2	0.603515	0.317835	0.103305	381.2	0.356537	0.109083	0.0275481	381.2	0.206562	0.0656374	0.0254362
381.4	1.11257	0.510415	0.20351	451.4	0.345019	0.158346	0.0576662	389	0.70563	0.231031	0.070905	381.4	0.604041	0.318633	0.103171	381.4	0.356877	0.108788	0.0277587	381.4	0.206589	0.066524	0.0250332
381.6	1.11272	0.510645	0.204107	451.6	0.345162	0.158748	0.0580626	389.2	0.705659	0.23104	0.0710533	381.6	0.604337	0.319017	0.103415	381.6	0.356759	0.108174	0.0273117	381.6	0.206641	0.0668207	0.0249515
381.8	1.11275	0.51099	0.204656	451.8	0.345333	0.158865	0.0583454	389.4	0.705664	0.231203	0.0710955	381.8	0.604975	0.318798	0.103803	381.8	0.356651	0.108322	0.0272822	381.8	0.2064	0.067002	0.024569
382	1.1135	0.511588	0.205147	452	0.345387	0.159259	0.0587501	389.6	0.705754	0.231423	0.07112	382	0.60547	0.319266	0.104412	382	0.356521	0.1081	0.0268357	382	0.206828	0.0671777	0.0247644
382.2	1.11409	0.512466	0.205255	452.2	0.346033	0.159391	0.058826	389.8	0.70638	0.232057	0.0716696	382.2	0.60581	0.319508	0.104552	382.2	0.356951	0.107811	0.0265999	382.2	0.207304	0.0671181	0.0248901
382.4	1.11488	0.512789	0.20593	452.4	0.346499	0.159431	0.0585853	390	0.706338	0.233091	0.0716813	382.4	0.606407	0.319757	0.10501	382.4	0.357111	0.107635	0.0264775	382.4	0.206643	0.0666851	0.0245452
382.6	1.11536	0.513042	0.206364	452.6	0.347003	0.160136	0.0590184	390.2	0.706748	0.233623	0.0721813	382.6	0.606672	0.319829	0.10515	382.6	0.35737	0.107445	0.0269203	382.6	0.206606	0.0668898	0.0244676
382.8	1.11659	0.513794	0.206853	452.8	0.347153	0.160317	0.059113	390.4	0.707675	0.233719	0.0723268	382.8	0.606968	0.319748	0.104968	382.8	0.357016	0.107446	0.0264797	382.8	0.205946	0.0661038	0.0238388
383	1.1171	0.513978	0.206834	453	0.347737	0.160813	0.0596302	390.6	0.70904	0.234821	0.0727933	383	0.607394	0.319587	0.105507	383	0.35711	0.107585	0.0263586	383	0.206022	0.0659257	0.0242092
383.2	1.11751	0.514468	0.206819	453.2	0.347417	0.161396	0.0596059	390.8	0.709926	0.235295	0.0731384	383.2	0.606598	0.319326	0.104662	383.2	0.357074	0.107633	0.0261772	383.2	0.20583	0.0658132	0.024255
383.4	1.11782	0.514336	0.206226	453.4	0.347215	0.161472	0.059512	391	0.70993	0.235722	0.0729084	383.4	0.60653	0.319219	0.104645	383.4	0.357372	0.107598	0.0265297	383.4	0.205503	0.0653536	0.0235216
383.6	1.11834	0.514282	0.206849	453.6	0.347308	0.161775	0.0598886	391.2	0.709855	0.236039	0.0729307	383.6	0.607033	0.319514	0.104806	383.6	0.357433	0.108202	0.0270499	383.6	0.20546	0.0650545	0.0236309
383.8	1.11861	0.514616	0.206684	453.8	0.347442	0.161402	0.0596757	391.4	0.709928	0.236019	0.0729573	383.8	0.606834	0.319581	0.104569	383.8	0.357958	0.108457	0.0275272	383.8	0.206214	0.0649268	0.0238228
384	1.11892	0.514557	0.206506	454	0.347596	0.160732	0.0590881	391.6	0.710689	0.236683	0.0731409	384	0.606552	0.320081	0.104511	384	0.357963	0.108543	0.0277567	384	0.205947	0.0643149	0.023851
384.2	1.11871	0.514691	0.206105	454.2	0.347842	0.160825	0.0591901	391.8	0.71121	0.236669	0.072689	384.2	0.606782	0.320302	0.104865	384.2	0.359057	0.109403	0.0283294	384.2	0.206369	0.0644932	0.0244613
384.4	1.11895	0.51491	0.206304	454.4	0.348383	0.161076	0.0597947	392	0.711395	0.236384	0.0721019	384.4	0.606792	0.319977	0.1049	384.4	0.359661	0.109797	0.0285689	384.4	0.206456	0.0640549	0.0246713
384.6	1.11916	0.514947	0.206178	454.6	0.348752	0.160896	0.0591456	392.2	0.711927	0.236113	0.0721732	384.6	0.606002	0.320056	0.104525	384.6	0.359986	0.10965	0.0285557	384.6	0.20722	0.0642906	0.0251153
384.8	1.11891	0.514816	0.206182	454.8	0.349067	0.161146	0.0594481	392.4	0.712711	0.236557	0.0724238	384.8	0.606225	0.320272	0.104406	384.8	0.360125	0.109661	0.0284388	384.8	0.206958	0.0643631	0.0247815
385	1.11867	0.514954	0.205744	455	0.348575	0.161223	0.0590347	392.6	0.712759	0.236601	0.0723585	385	0.606131	0.32073	0.104522	385	0.360563	0.109716	0.0293705	385	0.207139	0.0643155	0.0247074
385.2	1.1187	0.514753	0.205891	455.2	0.348173	0.161151	0.0583421	392.8	0.712892	0.236622	0.0718455	385.2	0.606982	0.321386	0.105117	385.2	0.360387	0.109424	0.0297794	385.2	0.207001	0.0647624	0.0239531
385.4	1.11793	0.514703	0.205798	455.4	0.348178	0.161853	0.0585659	393	0.71268	0.236365	0.0720338	385.4	0.607528	0.322041	0.105497	385.4	0.360522	0.109075	0.0302104	385.4	0.206487	0.0650379	0.0233335
385.6	1.11824	0.515085	0.206254	455.6	0.347687	0.161321	0.0582459	393.2	0.712533	0.235916	0.0720075	385.6	0.60827	0.322333	0.106116	385.6	0.361271	0.10955	0.0301635	385.6	0.206763	0.0656686	0.0236983
385.8	1.11865	0.515992	0.206579	455.8	0.347637	0.160992	0.0586425	393.4	0.712127	0.23586	0.0721487	385.8	0.608942	0.322664	0.106405	385.8	0.362232	0.109762	0.0304196	385.8	0.206754	0.0658065	0.0236606
386	1.11911	0.516184	0.206601	456	0.347672	0.160699	0.0589158	393.6	0.712087	0.236007	0.0720368	386	0.608895	0.322364	0.106176	386	0.362689	0.110029	0.0297732	386	0.207032	0.0655842	0.0241337
386.2	1.11977	0.516771	0.206624	456.2	0.34801	0.160757	0.0587855	393.8	0.712001	0.235814	0.072228	386.2	0.609089	0.322596	0.106044	386.2	0.363043	0.110271	0.0300804	386.2	0.206986	0.0658855	0.0240013
386.4	1.11994	0.517052	0.206631	456.4	0.348191	0.16162	0.0592756	394	0.711997	0.236475	0.072255	386.4	0.609867	0.322927	0.106182	386.4	0.3636	0.11083	0.0306756	386.4	0.206224	0.0657529	0.023512
386.6	1.12014	0.517374	0.206188	456.6	0.348473	0.161634	0.0597452	394.2	0.712271	0.235473	0.0723937	386.6	0.610052	0.323037	0.105795	386.6	0.363568	0.110915	0.0304897	386.6	0.205926	0.0657974	0.0236038
386.8	1.12091	0.517717	0.205581	456.8	0.348179	0.161169	0.0592708	394.4	0.713151	0.235515	0.0723626	386.8	0.610111	0.323254	0.105997	386.8	0.363455	0.110811	0.0302015	386.8	0.205392	0.0650372	0.0236441
387	1.12126	0.517806	0.205389	457	0.348598	0.1615	0.060166	394.6	0.713805	0.236122	0.0727611	387	0.609865	0.323281	0.105863	387	0.363725	0.110959	0.0298868	387	0.205305	0.0649846	0.0240894
387.2	1.12178	0.517576	0.205727	457.2	0.348323	0.161297	0.0595693	394.8	0.713931	0.236021	0.0727418	387.2	0.609421	0.32347	0.105337	387.2	0.363432	0.111024	0.029208	387.2	0.204881	0.0648869	0.0239127
387.4	1.1225	0.517763	0.20558	457.4	0.348061	0.160694	0.0599688	395	0.71412	0.235958	0.0725346	387.4	0.609947	0.323985	0.106039	387.4	0.363621	0.111381	0.0295625	387.4	0.205154	0.064969	0.0244919
387.6	1.12335	0.518128	0.206629	457.6	0.348683	0.160417	0.0600135	395.2	0.714311	0.236032	0.0730969	387.6	0.610048	0.324438	0.1059	387.6	0.364078	0.112107	0.0297272	387.6	0.205293	0.0649983	0.0249473
387.8	1.12351	0.518303	0.206553	457.8	0.348829	0.160124	0.0598924	395.4	0.71422	0.236025	0.0733709	387.8	0.609919	0.324207	0.10552	387.8	0.364578	0.112049	0.0292373	387.8	0.205967	0.065269	0.0251635
388	1.12426	0.51889	0.206833	458	0.348985	0.159916	0.0595188	395.6	0.714571	0.236199	0.0732935	388	0.609869	0.324093	0.105178	388	0.364701	0.112156	0.0287926	388	0.20625	0.065514	0.0252285
388.2	1.12463	0.519151	0.207285	458.2	0.349309	0.159887	0.0595869	395.8	0.714868	0.235859	0.0730448	388.2	0.610158	0.323751	0.105403	388.2	0.365164	0.11221	0.0286331	388.2	0.206443	0.0656008	0.0259728
388.4	1.1253	0.519407	0.207924	458.4	0.349361	0.159898	0.0591396	396	0.715205	0.235862	0.0731345	388.4	0.610339	0.323563	0.105277	388.4	0.365234	0.112234	0.0282075	388.4	0.206212	0.0655789	0.0260914
388.6	1.12531	0.519333	0.207991	458.6	0.349033	0.159404	0.0586358	396.2	0.715657	0.235846	0.0729354	388.6	0.610734	0.324028	0.105847	388.6	0.365102	0.1124	0.0278129	388.6	0.206394	0.0651548	0.0262703
388.8	1.12526	0.519515	0.208284	458.8	0.349049	0.159656	0.0583543	396.4	0.715454	0.236128	0.0727448	388.8	0.61159	0.324824	0.106362	388.8	0.364471	0.112468	0.0277222	388.8	0.205565	0.064646	0.0255789
389	1.12574	0.519894	0.20865	459	0.349168	0.159829	0.0579337	396.6	0.715271	0.236324	0.0719386	389	0.611442	0.324831	0.106542	389	0.364739	0.112754	0.0282215	389	0.205308	0.0641329	0.025213
389.2	1.1261	0.519906	0.20898	459.2	0.348891	0.15976	0.0575271	396.8	0.715562	0.236802	0.0719282	389.2	0.611714	0.324391	0.106243	389.2	0.364749	0.112426	0.0280122	389.2	0.205332	0.0645943	0.0246435
389.4	1.12639	0.520329	0.208803	459.4	0.349148	0.159741	0.0574942	397	0.715305	0.236674	0.0721092	389.4	0.611595	0.323965	0.105915	389.4	0.365513	0.112598	0.0280592	389.4	0.205197	0.0640709	0.0241473
389.6	1.12637	0.520298	0.208444	459.6	0.3488	0.158842	0.057459	397.2	0.715451	0.236958	0.0723049	389.6	0.611715	0.323753	0.105793	389.6	0.366469	0.112895	0.0281995	389.6	0.205447	0.0639081	0.0240088
389.8	1.12629	0.520257	0.208216	459.8	0.349303	0.158841	0.0577463	397.4	0.7151	0.237322	0.0724215	389.8	0.611809	0.323763	0.105375	389.8	0.366086	0.11275	0.0276373	389.8	0.204827	0.0632784	0.0234209
390	1.12656	0.520123	0.208167	460	0.349702	0.158922	0.0576617	397.6	0.715182	0.237611	0.0723824	390	0.611536	0.323643	0.105154	390	0.366002	0.113048	0.0275424	390	0.204939	0.0628179	0.0232104
390.2	1.12664	0.520286	0.208132	460.2	0.349983	0.159054	0.0577731	397.8	0.715399	0.2378	0.0729032	390.2	0.611895	0.324157	0.105019	390.2	0.366208	0.112748	0.0279779	390.2	0.204887	0.0629689	0.0228703
390.4	1.12644	0.520551	0.207895	460.4	0.350504	0.160168	0.0584004	398	0.716029	0.238716	0.0729678	390.4	0.612948	0.324762	0.105206	390.4	0.366575	0.11256	0.0282317	390.4	0.204465	0.0627854	0.0226047
390.6	1.12666	0.520898	0.207895	460.6	0.350783	0.160429	0.0587596	398.2	0.716427	0.238016	0.0729341	390.6	0.613219	0.325432	0.105196	390.6	0.366594	0.112387	0.0282886	390.6	0.203885	0.0622445	0.0226014
390.8	1.12633	0.52064	0.207692	460.8	0.350672	0.160478	0.0588988	398.4	0.716964	0.238808	0.0732717	390.8	0.613165	0.325566	0.105363	390.8	0.367307	0.112083	0.0286624	390.8	0.203747	0.0619438	0.022597
391	1.12668	0.521141	0.208234	461	0.351266	0.161223	0.0598547	398.6	0.717632	0.239209	0.0738731	391	0.613318	0.325657	0.10481	391	0.367494	0.112182	0.0288855	391	0.203675	0.0622616	0.0226799
391.2	1.12682	0.521064	0.208797	461.2	0.351211	0.161386	0.0598735	398.8	0.717755	0.23907	0.0737058	391.2	0.613716	0.326368	0.10546	391.2	0.36798	0.112285	0.0290235	391.2	0.203775	0.0624133	0.0223205
391.4	1.12726	0.521437	0.208909	461.4	0.351076	0.161284	0.0600027	399	0.71782	0.23936	0.0740786	391.4	0.614243	0.326621	0.105591	391.4	0.368499	0.112842	0.0296062	391.4	0.205038	0.0636705	0.0232975
391.6	1.12739	0.522037	0.209541	461.6	0.351563	0.1619	0.060365	399.2	0.717969	0.239404	0.0745899	391.6	0.614387	0.326821	0.105548	391.6	0.369169	0.112812	0.0294888	391.6	0.205059	0.063999	0.0229885
391.8	1.12759	0.522171	0.209525	461.8	0.351306	0.16219	0.0604571	399.4	0.71801	0.239368	0.074483	391.8	0.61446	0.326521	0.105403	391.8	0.369763	0.113058	0.0299688	391.8	0.205089	0.0640206	0.0227422
392	1.12802	0.522455	0.209561	462	0.351281	0.162355	0.060243	399.6	0.718367	0.239301	0.0744108	392	0.614617	0.327273	0.105826	392	0.370321	0.1131	0.0300026	392	0.20462	0.064322	0.0231814
392.2	1.1286	0.522619	0.210167	462.2	0.351147	0.16234	0.06027	399.8	0.718436	0.238981	0.0741556	392.2	0.615103	0.327945	0.106933	392.2	0.370776	0.113343	0.0297907	392.2	0.204434	0.0642843	0.0236608
392.4	1.12886	0.522891	0.210338	462.4	0.35123	0.162647	0.0600089	400	0.718861	0.239319	0.0742316	392.4	0.615731	0.328737	0.10772	392.4	0.370971	0.114069	0.0296997	392.4	0.204654	0.0647668	0.0240068
392.6	1.12881	0.523347	0.210545	462.6	0.351763	0.162767	0.0604016	400.2	0.718906	0.239268	0.0736437	392.6	0.615722	0.329141	0.107812	392.6	0.370507	0.114204	0.0296695	392.6	0.204918	0.0647004	0.0243653
392.8	1.1293	0.524014	0.210672	462.8	0.35246	0.163051	0.0601708	400.4	0.719101	0.239211	0.0734704	392.8	0.615602	0.329669	0.108133	392.8	0.370256	0.113805	0.0292676	392.8	0.204569	0.0648825	0.0242975
393	1.12959	0.524527	0.210663	463	0.352807	0.163186	0.0600782	400.6	0.719758	0.239177	0.0730708	393	0.615463	0.329632	0.107781	393	0.370905	0.114157	0.0291258	393	0.204842	0.0651691	0.0244167
393.2	1.12977	0.524879	0.210143	463.2	0.352422	0.162888	0.0596916	400.8	0.719921	0.239224	0.0730263	393.2	0.61471	0.328912	0.107278	393.2	0.371093	0.114751	0.0291493	393.2	0.205253	0.0653307	0.0242997
393.4	1.12997	0.525071	0.209741	463.4	0.352594	0.162652	0.0593832	401	0.719893	0.238971	0.0730921	393.4	0.614704	0.329194	0.107327	393.4	0.370948	0.114707	0.0293347	393.4	0.205474	0.0646372	0.0240761
393.6	1.12966	0.524744	0.209776	463.6	0.352072	0.162367	0.0591142	401.2	0.720393	0.238817	0.0730198	393.6	0.614562	0.329241	0.10732	393.6	0.370888	0.114575	0.029298	393.6	0.20519	0.064802	0.0239646
393.8	1.12988	0.52491	0.210055	463.8	0.35212	0.162276	0.0590716	401.4	0.719864	0.23851	0.0726865	393.8	0.614889	0.330205	0.107643	393.8	0.370435	0.114069	0.0288155	393.8	0.205681	0.0654842	0.0243533
394	1.13047	0.525319	0.209794	464	0.352652	0.162445	0.0595118	401.6	0.720388	0.239168	0.0729526	394	0.61505	0.330229	0.107695	394	0.371061	0.113772	0.028989	394	0.206112	0.0656707	0.0246547
394.2	1.1308	0.525355	0.20991	464.2	0.352545	0.162627	0.0597903	401.8	0.720479	0.239305	0.0730797	394.2	0.615459	0.330074	0.107713	394.2	0.37108	0.113546	0.0289893	394.2	0.206356	0.0657413	0.0245701
394.4	1.13119	0.525642	0.20987	464.4	0.352928	0.163207	0.0599374	402	0.720649	0.239778	0.0730285	394.4	0.61571	0.330783	0.107915	394.4	0.371005	0.113686	0.0292369	394.4	0.205939	0.0654521	0.0243882
394.6	1.13125	0.525658	0.210148	464.6	0.352382	0.162731	0.0591491	402.2	0.720897	0.23979	0.0731217	394.6	0.615661	0.331197	0.107596	394.6	0.371129	0.113979	0.0295705	394.6	0.206075	0.0656439	0.024334
394.8	1.13133	0.525755	0.210068	464.8	0.352211	0.16224	0.0591749	402.4	0.720844	0.240507	0.073445	394.8	0.615582	0.330943	0.107682	394.8	0.371254	0.113705	0.0294514	394.8	0.206618	0.0658697	0.0245553
395	1.13192	0.526115	0.210522	465	0.352207	0.16256	0.0598317	402.6	0.720977	0.240666	0.0737766	395	0.616378	0.331206	0.107695	395	0.371124	0.113662	0.0294241	395	0.20691	0.0665177	0.0249156
395.2	1.13257	0.525729	0.210645	465.2	0.35176	0.162018	0.0596991	402.8	0.720737	0.240744	0.0736012	395.2	0.61685	0.331386	0.108163	395.2	0.371298	0.113505	0.0289593	395.2	0.206567	0.0666057	0.0249443
395.4	1.13296	0.525534	0.210424	465.4	0.351689	0.162049	0.0598262	403	0.721232	0.241285	0.0740253	395.4	0.61701	0.330972	0.108422	395.4	0.371672	0.113908	0.0294631	395.4	0.206838	0.0672914	0.0251866
395.6	1.13286	0.525924	0.210156	465.6	0.351949	0.16225	0.0602803	403.2	0.721449	0.241373	0.0740306	395.6	0.617303	0.331072	0.108618	395.6	0.372389	0.113969	0.0298106	395.6	0.206407	0.0670366	0.0248478
395.8	1.13306	0.525274	0.209932	465.8	0.35193	0.162391	0.0600787	403.4	0.721749	0.241524	0.0738531	395.8	0.617773	0.331127	0.109131	395.8	0.372917	0.114113	0.0303512	395.8	0.205783	0.0670807	0.0250344
396	1.13372	0.525297	0.210067	466	0.352317	0.162164	0.0599345	403.6	0.721921	0.241288	0.0742763	396	0.618186	0.331474	0.109452	396	0.373204	0.114152	0.0302611	396	0.205652	0.0667772	0.0251844
396.2	1.13434	0.524925	0.210105	466.2	0.35238	0.161338	0.0594366	403.8	0.721845	0.240999	0.0742613	396.2	0.618715	0.331553	0.109688	396.2	0.37359	0.114367	0.0306341	396.2	0.20613	0.0668089	0.025304
396.4	1.13467	0.525236	0.210347	466.4	0.352733	0.161236	0.0592223	404	0.721882	0.241461	0.074034	396.4	0.619079	0.331625	0.108701	396.4	0.373571	0.113814	0.0307071	396.4	0.206154	0.066631	0.0252762
396.6	1.13419	0.525073	0.210133	466.6	0.352843	0.161217	0.0590338	404.2	0.721963	0.241165	0.0736667	396.6	0.618855	0.331544	0.108358	396.6	0.373576	0.113423	0.0305058	396.6	0.206018	0.066459	0.0256898
396.8	1.13455	0.524927	0.209917	466.8	0.352428	0.161351	0.0587833	404.4	0.722122	0.240954	0.0735642	396.8	0.619395	0.331962	0.108915	396.8	0.373738	0.11353	0.0303077	396.8	0.205872	0.066294	0.0256991
397	1.13465	0.525233	0.209887	467	0.352293	0.161846	0.0590276	404.6	0.722664	0.241133	0.0735698	397	0.619641	0.332181	0.108446	397	0.37425	0.114418	0.0305782	397	0.206112	0.0660932	0.0258602
397.2	1.13486	0.525537	0.209961	467.2	0.352476	0.162327	0.0593848	404.8	0.72273	0.241426	0.0734209	397.2	0.620074	0.332218	0.108624	397.2	0.374993	0.115003	0.0311831	397.2	0.205977	0.0660906	0.0258635
397.4	1.13538	0.525891	0.210307	467.4	0.352605	0.162295	0.0591404	405	0.723278	0.241804	0.0741479	397.4	0.62082	0.332807	0.109231	397.4	0.375143	0.114369	0.0310788	397.4	0.205921	0.0657512	0.0254108
397.6	1.13502	0.526413	0.210588	467.6	0.352769	0.162932	0.0595678	405.2	0.723928	0.241731	0.0740748	397.6	0.621137	0.332901	0.109436	397.6	0.375453	0.114108	0.0310984	397.6	0.20583	0.0658779	0.0251513
397.8	1.13575	0.527227	0.210932	467.8	0.353131	0.162731	0.0597059	405.4	0.724024	0.241888	0.074529	397.8	0.62157	0.333389	0.109765	397.8	0.375587	0.113847	0.030599	397.8	0.205805	0.0658668	0.0249664
398	1.13644	0.527545	0.210955	468	0.353914	0.163466	0.0600769	405.6	0.724209	0.242441	0.075109	398	0.621567	0.333276	0.109869	398	0.375448	0.114078	0.0305396	398	0.205508	0.0653125	0.0245579
398.2	1.13703	0.527824	0.211516	468.2	0.353815	0.163914	0.0598706	405.8	0.724431	0.242547	0.0753073	398.2	0.621684	0.333836	0.110323	398.2	0.374989	0.114224	0.0303275	398.2	0.20555	0.0647494	0.0239958
398.4	1.13736	0.528361	0.211847	468.4	0.354036	0.163718	0.0599749	406	0.724383	0.242187	0.0753907	398.4	0.621729	0.334487	0.110587	398.4	0.375037	0.114345	0.0303123	398.4	0.205349	0.0650212	0.0240239
398.6	1.13726	0.528467	0.212075	468.6	0.353909	0.163931	0.0600418	406.2	0.723888	0.241384	0.0752643	398.6	0.621999	0.334662	0.111048	398.6	0.375107	0.114416	0.0304053	398.6	0.205467	0.0652004	0.0241288
398.8	1.13794	0.529125	0.212542	468.8	0.354066	0.164073	0.0612675	406.4	0.724059	0.241877	0.0761894	398.8	0.62215	0.334628	0.111485	398.8	0.374686	0.113707	0.0292088	398.8	0.205745	0.0649554	0.0245041
399	1.13833	0.529774	0.213083	469	0.354149	0.163915	0.0614965	406.6	0.724059	0.241797	0.0766655	399	0.622788	0.335078	0.111766	399	0.37478	0.11369	0.0290858	399	0.205148	0.0651689	0.0245703
399.2	1.13843	0.53004	0.212841	469.2	0.35457	0.163922	0.0620351	406.8	0.724349	0.241601	0.0768244	399.2	0.623191	0.335139	0.112141	399.2	0.374728	0.113361	0.0288613	399.2	0.204888	0.0654793	0.0246093
399.4	1.13795	0.529976	0.212763	469.4	0.355523	0.164175	0.0625862	407	0.724257	0.241114	0.0763512	399.4	0.623272	0.334966	0.112591	399.4	0.375508	0.113894	0.0290065	399.4	0.205364	0.0657123	0.0246607
399.6	1.13786	0.530318	0.212834	469.6	0.355477	0.164139	0.0623676	407.2	0.723837	0.240889	0.0761763	399.6	0.623266	0.334448	0.111985	399.6	0.375564	0.113211	0.0288025	399.6	0.205684	0.0654629	0.024575
399.8	1.13779	0.53027	0.212554	469.8	0.355307	0.164549	0.0626583	407.4	0.723902	0.240541	0.075645	399.8	0.623809	0.334326	0.112125	399.8	0.37558	0.113029	0.0288376	399.8	0.206279	0.065843	0.0249583
400	1.13821	0.530328	0.212193	470	0.354952	0.16419	0.0624304	407.6	0.723622	0.240071	0.0753737	400	0.623902	0.334302	0.111406	400	0.375863	0.113476	0.0292288	400	0.206534	0.0654968	0.0249606
400.2	1.13778	0.529816	0.212043	470.2	0.354396	0.16402	0.0622225	407.8	0.723225	0.240265	0.0747759	400.2	0.623549	0.333889	0.110882	400.2	0.376344	0.113395	0.0295721	400.2	0.206769	0.0658172	0.025323
400.4	1.13724	0.529644	0.211976	470.4	0.354121	0.164731	0.0624304	408	0.723523	0.240897	0.0744451	400.4	0.623165	0.333629	0.110249	400.4	0.376792	0.113877	0.0297408	400.4	0.206538	0.065459	0.0246724
400.6	1.1374	0.529401	0.211911	470.6	0.353629	0.165407	0.0624765	408.2	0.724236	0.24128	0.0746757	400.6	0.62318	0.33393	0.110604	400.6	0.37738	0.114611	0.0301815	400.6	0.207032	0.0661784	0.0252427
400.8	1.13766	0.529986	0.212084	470.8	0.353506	0.166014	0.0630909	408.4	0.725298	0.242241	0.0749193	400.8	0.623513	0.334267	0.110539	400.8	0.377958	0.115652	0.0308483	400.8	0.207125	0.0660759	0.0249523
401	1.13799	0.530407	0.212189	471	0.353629	0.166078	0.062799	408.6	0.726335	0.242916	0.075146	401	0.623228	0.334737	0.110114	401	0.378596	0.116109	0.0312047	401	0.207327	0.0661472	0.0251883
401.2	1.13825	0.530809	0.212885	471.2	0.354014	0.166163	0.0628948	408.8	0.727015	0.243661	0.0753807	401.2	0.623014	0.334716	0.110114	401.2	0.379588	0.116956	0.0316225	401.2	0.206886	0.0662099	0.0250157
401.4	1.13859	0.531172	0.213153	471.4	0.353602	0.16571	0.0621012	409	0.727481	0.243509	0.0749339	401.4	0.622708	0.335357	0.110502	401.4	0.379523	0.117205	0.0316984	401.4	0.207091	0.066074	0.0247501
401.6	1.13912	0.531733	0.213791	471.6	0.353611	0.16581	0.0620306	409.2	0.727701	0.243423	0.0748512	401.6	0.622694	0.335952	0.110678	401.6	0.379456	0.117164	0.0315823	401.6	0.206546	0.0659264	0.0243301
401.8	1.1398	0.53198	0.214082	471.8	0.353427	0.165095	0.0616637	409.4	0.728159	0.243702	0.0755523	401.8	0.623107	0.336132	0.111059	401.8	0.379565	0.117673	0.0309744	401.8	0.205895	0.0653634	0.0239903
402	1.14016	0.531863	0.214232	472	0.353351	0.165452	0.0615899	409.6	0.728653	0.24383	0.0759857	402	0.623101	0.336178	0.111319	402	0.379936	0.118418	0.0318443	402	0.206026	0.0656232	0.0240262
402.2	1.14118	0.531764	0.214705	472.2	0.352977	0.165324	0.061165	409.8	0.729035	0.243662	0.0758971	402.2	0.623291	0.336457	0.11178	402.2	0.380432	0.118915	0.0316943	402.2	0.206024	0.0656342	0.0240613
402.4	1.14215	0.531794	0.215356	472.4	0.352702	0.164506	0.0608005	410	0.728595	0.242996	0.0757951	402.4	0.623285	0.336398	0.111945	402.4	0.380817	0.118972	0.0313509	402.4	0.205394	0.0656252	0.0239642
402.6	1.14241	0.53169	0.215456	472.6	0.352838	0.164696	0.0607524	410.2	0.728882	0.243504	0.0763661	402.6	0.623699	0.337324	0.11273	402.6	0.380964	0.118761	0.0313126	402.6	0.205666	0.0656443	0.0242441
402.8	1.1426	0.531785	0.215451	472.8	0.352723	0.163912	0.0605115	410.4	0.728973	0.244511	0.0771682	402.8	0.623731	0.33758	0.112795	402.8	0.381235	0.11869	0.0308163	402.8	0.205762	0.0658214	0.0245975
403	1.14271	0.532248	0.215391	473	0.35316	0.163916	0.0601245	410.6	0.72856	0.244212	0.0765212	403	0.62429	0.337677	0.113185	403	0.381786	0.118776	0.0311729	403	0.20572	0.0659381	0.0248237
403.2	1.14279	0.532004	0.215023	473.2	0.353811	0.164083	0.0602986	410.8	0.728548	0.24376	0.0757593	403.2	0.62462	0.338144	0.113494	403.2	0.381944	0.118331	0.0307802	403.2	0.205892	0.0661397	0.0251367
403.4	1.14316	0.531927	0.215297	473.4	0.354566	0.164064	0.059939	411	0.727816	0.243034	0.0750866	403.4	0.624202	0.338071	0.112929	403.4	0.382343	0.118184	0.0303305	403.4	0.206221	0.0659155	0.0254219
403.6	1.14362	0.531697	0.214672	473.6	0.355246	0.16489	0.0601606	411.2	0.728303	0.243263	0.0756947	403.6	0.624704	0.338423	0.112831	403.6	0.381992	0.117493	0.0300539	403.6	0.206341	0.0654765	0.0252847
403.8	1.14334	0.531634	0.213746	473.8	0.355684	0.165749	0.0605624	411.4	0.728596	0.243517	0.0754454	403.8	0.625361	0.338896	0.113045	403.8	0.381728	0.117612	0.0300039	403.8	0.20711	0.0660463	0.0260331
404	1.14347	0.531903	0.213621	474	0.356243	0.165894	0.0606115	411.6	0.728815	0.244121	0.0757595	404	0.62527	0.338631	0.112754	404	0.381722	0.117352	0.0300178	404	0.206764	0.0654711	0.02585
404.2	1.1435	0.532007	0.213627	474.2	0.356846	0.166698	0.0608917	411.8	0.728732	0.244125	0.0755935	404.2	0.625032	0.338187	0.112619	404.2	0.382021	0.116828	0.0303494	404.2	0.206889	0.0653049	0.0258316
404.4	1.14396	0.532218	0.213358	474.4	0.356872	0.167077	0.0611151	412	0.729396	0.244315	0.0752035	404.4	0.625245	0.338098	0.112447	404.4	0.382022	0.117249	0.0306065	404.4	0.207435	0.0652978	0.0257475
404.6	1.14472	0.53284	0.213399	474.6	0.357598	0.167407	0.0611919	412.2	0.729965	0.244571	0.074853	404.6	0.625526	0.338409	0.112473	404.6	0.38141	0.116377	0.0304317	404.6	0.208166	0.0657267	0.0267427
404.8	1.14463	0.533415	0.21331	474.8	0.357978	0.167126	0.0615119	412.4	0.730811	0.245414	0.0753712	404.8	0.625721	0.338655	0.112759	404.8	0.381282	0.116502	0.0303295	404.8	0.208355	0.06506	0.0268862
405	1.14463	0.533649	0.213411	475	0.358515	0.166721	0.0614314	412.6	0.730703	0.245063	0.0750601	405	0.625661	0.33857	0.112378	405	0.38115	0.11627	0.0302791	405	0.208004	0.0647483	0.0272372
405.2	1.14479	0.53402	0.213889	475.2	0.358559	0.166171	0.0618125	412.8	0.730602	0.245094	0.0749302	405.2	0.625908	0.338524	0.112422	405.2	0.381638	0.117097	0.0307104	405.2	0.207674	0.0646981	0.0268404
405.4	1.14461	0.53447	0.213865	475.4	0.358881	0.166364	0.0622234	413	0.7307	0.244792	0.0745648	405.4	0.626215	0.33884	0.112405	405.4	0.381349	0.116868	0.0303466	405.4	0.207945	0.0645337	0.026632
405.6	1.14513	0.534866	0.2142	475.6	0.358654	0.165798	0.0628375	413.2	0.730685	0.245121	0.0752683	405.6	0.62686	0.338511	0.11259	405.6	0.381396	0.116869	0.0302182	405.6	0.207273	0.0641909	0.0263926
405.8	1.14519	0.534956	0.214117	475.8	0.357957	0.165315	0.0626662	413.4	0.731204	0.244817	0.0753522	405.8	0.627354	0.338356	0.112715	405.8	0.381726	0.117908	0.0304929	405.8	0.207284	0.0640996	0.0261154
406	1.14563	0.534937	0.214122	476	0.357761	0.165546	0.0628561	413.6	0.731152	0.244223	0.0754474	406	0.626913	0.337911	0.11268	406	0.382032	0.118155	0.0307962	406	0.207595	0.0646386	0.025785
406.2	1.14615	0.534973	0.21487	476.2	0.357514	0.164913	0.0625606	413.8	0.731335	0.244301	0.0754413	406.2	0.62708	0.33815	0.112946	406.2	0.382058	0.118165	0.0300354	406.2	0.20677	0.064215	0.0250671
406.4	1.14602	0.534604	0.215137	476.4	0.357314	0.164268	0.0624261	414	0.731464	0.244593	0.0752196	406.4	0.627276	0.338194	0.113349	406.4	0.382475	0.118503	0.0295554	406.4	0.206185	0.0639621	0.0245138
406.6	1.14586	0.534875	0.215162	476.6	0.357429	0.164246	0.0628044	414.2	0.731604	0.245542	0.075331	406.6	0.627323	0.338802	0.113916	406.6	0.383133	0.118378	0.0298292	406.6	0.206645	0.0645401	0.0247176
406.8	1.14554	0.534372	0.215325	476.8	0.358082	0.164337	0.0630019	414.4	0.731281	0.245061	0.0748029	406.8	0.627425	0.339569	0.113989	406.8	0.384083	0.118793	0.0300698	406.8	0.205911	0.0643862	0.0244913
407	1.14599	0.534341	0.215703	477	0.358012	0.164623	0.0629135	414.6	0.731323	0.244542	0.0739383	407	0.627931	0.339833	0.114211	407	0.384364	0.118818	0.0300498	407	0.205593	0.06452	0.0239017
407.2	1.14655	0.534136	0.215683	477.2	0.35855	0.164437	0.063302	414.8	0.7317	0.243949	0.0737984	407.2	0.628113	0.34057	0.11399	407.2	0.38427	0.118471	0.0298498	407.2	0.205072	0.0647807	0.023238
407.4	1.14685	0.533795	0.216008	477.4	0.359325	0.164807	0.0634044	415	0.73156	0.24365	0.0743211	407.4	0.628239	0.34121	0.114115	407.4	0.383971	0.118601	0.0295847	407.4	0.205112	0.0651188	0.0230226
407.6	1.14689	0.533653	0.215349	477.6	0.359281	0.165388	0.0637033	415.2	0.732441	0.244221	0.0746813	407.6	0.629038	0.341855	0.11456	407.6	0.383748	0.118455	0.0291924	407.6	0.204794	0.0651584	0.0230046
407.8	1.1467	0.533745	0.215373	477.8	0.358828	0.165661	0.0637101	415.4	0.732256	0.244983	0.0747004	407.8	0.629221	0.3421	0.114667	407.8	0.383917	0.117825	0.029347	407.8	0.204685	0.065487	0.023063
408	1.14726	0.534296	0.215857	478	0.358818	0.16568	0.0636628	415.6	0.732557	0.245029	0.0750921	408	0.629043	0.341428	0.114377	408	0.384032	0.117768	0.0293191	408	0.204659	0.0654385	0.0227227
408.2	1.14789	0.534824	0.216169	478.2	0.358681	0.166103	0.0638699	415.8	0.732272	0.244395	0.0743116	408.2	0.629262	0.341684	0.114744	408.2	0.384559	0.117777	0.029532	408.2	0.204656	0.0657105	0.0230157
408.4	1.14865	0.534738	0.21649	478.4	0.358114	0.166224	0.0636251	416	0.732287	0.244744	0.0741133	408.4	0.629653	0.341646	0.114624	408.4	0.385081	0.117863	0.0300352	408.4	0.205334	0.0663728	0.0231883
408.6	1.14898	0.534547	0.216371	478.6	0.358788	0.166632	0.0640436	416.2	0.732392	0.245232	0.0747114	408.6	0.629808	0.342041	0.114854	408.6	0.385474	0.117725	0.0302485	408.6	0.205362	0.0667303	0.0235729
408.8	1.14927	0.535076	0.216986	478.8	0.358499	0.166768	0.064054	416.4	0.731921	0.244973	0.0748404	408.8	0.630406	0.342097	0.115024	408.8	0.386029	0.118302	0.0302677	408.8	0.205111	0.0665778	0.0234931
409	1.14926	0.535357	0.217238	479	0.358832	0.166891	0.0636185	416.6	0.731827	0.244461	0.0748741	409	0.630672	0.341705	0.114001	409	0.38729	0.118793	0.0306408	409	0.204631	0.0659612	0.0233604
409.2	1.14963	0.535604	0.217066	479.2	0.358779	0.167247	0.0634135	416.8	0.731883	0.244628	0.074903	409.2	0.630748	0.341319	0.113522	409.2	0.387876	0.119085	0.0307319	409.2	0.204546	0.065668	0.0231567
409.4	1.14938	0.536052	0.216891	479.4	0.359613	0.168203	0.0637832	417	0.732224	0.244912	0.075401	409.4	0.630378	0.341179	0.113096	409.4	0.387874	0.118973	0.0304752	409.4	0.204952	0.0653293	0.0238737
409.6	1.14968	0.535878	0.216745	479.6	0.358774	0.167672	0.0632887	417.2	0.731992	0.244965	0.0754623	409.6	0.630717	0.341114	0.113555	409.6	0.387645	0.119166	0.030258	409.6	0.20447	0.0651051	0.0237635
409.8	1.14981	0.536124	0.217094	479.8	0.359352	0.168327	0.0634626	417.4	0.732753	0.24508	0.0757041	409.8	0.630919	0.341387	0.113672	409.8	0.388225	0.119899	0.0306652	409.8	0.204328	0.0650334	0.0233252
410	1.15044	0.536628	0.217115	480	0.360007	0.168791	0.0633719	417.6	0.732807	0.245467	0.0758346	410	0.630822	0.341771	0.113695	410	0.388224	0.119826	0.0299546	410	0.204225	0.0648573	0.0231088
410.2	1.15062	0.536888	0.2175	480.2	0.360235	0.16862	0.0626117	417.8	0.733383	0.24588	0.0752293	410.2	0.631533	0.341891	0.114068	410.2	0.388775	0.12007	0.0296507	410.2	0.203582	0.0645668	0.0227028
410.4	1.1505	0.536498	0.217022	480.4	0.360406	0.168607	0.0622375	418	0.733753	0.246654	0.0752061	410.4	0.631836	0.342443	0.114792	410.4	0.389214	0.120076	0.0297067	410.4	0.203117	0.064051	0.0224504
410.6	1.15084	0.537274	0.217298	480.6	0.361377	0.169169	0.0621758	418.2	0.733992	0.246893	0.0749695	410.6	0.631746	0.342516	0.114654	410.6	0.38926	0.119438	0.0300681	410.6	0.203166	0.0637361	0.0227936
410.8	1.15085	0.537213	0.217063	480.8	0.361393	0.168955	0.0618865	418.4	0.734209	0.246453	0.0750999	410.8	0.632065	0.342981	0.114589	410.8	0.389008	0.119333	0.0300066	410.8	0.202493	0.0631863	0.0224425
411	1.15108	0.537148	0.217141	481	0.360687	0.168136	0.0615653	418.6	0.734499	0.2469	0.0753353	411	0.632236	0.342623	0.114499	411	0.388502	0.119132	0.029822	411	0.202393	0.0632952	0.022317
411.2	1.151	0.536995	0.217292	481.2	0.360998	0.167923	0.0618504	418.8	0.734681	0.247188	0.0756258	411.2	0.632632	0.343246	0.115047	411.2	0.387959	0.118774	0.0297767	411.2	0.202684	0.0637322	0.0227011
411.4	1.15114	0.53711	0.217539	481.4	0.360831	0.16776	0.061387	419	0.734724	0.247901	0.0756056	411.4	0.632367	0.343826	0.115362	411.4	0.387737	0.118859	0.0291608	411.4	0.202805	0.0639103	0.0230903
411.6	1.15162	0.537682	0.217661	481.6	0.360256	0.1678	0.0614082	419.2	0.734922	0.24861	0.0754657	411.6	0.632476	0.34379	0.115092	411.6	0.387653	0.118278	0.0290258	411.6	0.202661	0.0631928	0.023364
411.8	1.15201	0.538162	0.217944	481.8	0.360162	0.167632	0.0612224	419.4	0.734552	0.248822	0.0757207	411.8	0.631809	0.343584	0.115045	411.8	0.388179	0.117988	0.0292712	411.8	0.202373	0.0627359	0.0230757
412	1.153	0.538938	0.218652	482	0.359793	0.166901	0.0609982	419.6	0.734163	0.247793	0.0753199	412	0.631821	0.34353	0.115402	412	0.388396	0.118419	0.029555	412	0.203029	0.0627866	0.0233127
412.2	1.15319	0.539364	0.218616	482.2	0.359478	0.166619	0.0618022	419.8	0.7337	0.247688	0.0750119	412.2	0.632617	0.344696	0.116025	412.2	0.388713	0.118641	0.0297082	412.2	0.203602	0.0632028	0.0238064
412.4	1.15383	0.539353	0.218616	482.4	0.359033	0.166552	0.0616118	420	0.733948	0.247628	0.0752455	412.4	0.632375	0.344583	0.116096	412.4	0.389057	0.118523	0.030319	412.4	0.204112	0.063495	0.0238052
412.6	1.15401	0.539882	0.218358	482.6	0.359259	0.166767	0.0621604	420.2	0.733876	0.24713	0.0749294	412.6	0.632075	0.344343	0.116162	412.6	0.389331	0.118844	0.0304478	412.6	0.20434	0.0639459	0.0245632
412.8	1.15413	0.540443	0.218367	482.8	0.35937	0.166893	0.0618976	420.4	0.734406	0.246667	0.0750186	412.8	0.632706	0.34472	0.116414	412.8	0.38962	0.118713	0.0302938	412.8	0.204475	0.0638077	0.0241689
413	1.15467	0.540357	0.217966	483	0.359108	0.166702	0.0615912	420.6	0.735147	0.246547	0.075329	413	0.63256	0.344791	0.115754	413	0.390453	0.118943	0.0306772	413	0.204722	0.0640044	0.0244021
413.2	1.15486	0.540494	0.21758	483.2	0.35871	0.166622	0.0618444	420.8	0.735367	0.246464	0.0754568	413.2	0.632824	0.344901	0.116343	413.2	0.389865	0.118562	0.0304729	413.2	0.205202	0.0642543	0.0244301
413.4	1.15451	0.540481	0.217613	483.4	0.358987	0.166922	0.0622339	421	0.735878	0.24675	0.0762246	413.4	0.632804	0.345226	0.11694	413.4	0.389639	0.118797	0.0307286	413.4	0.205686	0.0643443	0.0244577
413.6	1.15514	0.540786	0.217553	483.6	0.358891	0.166704	0.0624154	421.2	0.736526	0.246712	0.0762386	413.6	0.633168	0.345773	0.117342	413.6	0.389715	0.118611	0.0309779	413.6	0.205307	0.0647251	0.0238079
413.8	1.15573	0.541257	0.217683	483.8	0.359651	0.167272	0.0631248	421.4	0.73725	0.246704	0.0760283	413.8	0.633484	0.346097	0.117047	413.8	0.39045	0.119421	0.0317335	413.8	0.20555	0.0650093	0.0235754
414	1.15608	0.541409	0.217489	484	0.35946	0.167384	0.0622212	421.6	0.737391	0.246868	0.0758149	414	0.633549	0.346639	0.117351	414	0.390907	0.119417	0.0315193	414	0.205835	0.0653085	0.0233275
414.2	1.15548	0.541171	0.217347	484.2	0.359171	0.167422	0.0619494	421.8	0.737691	0.246393	0.0755827	414.2	0.633467	0.346146	0.117516	414.2	0.391409	0.119382	0.0317521	414.2	0.205518	0.0650824	0.0229251
414.4	1.15519	0.541358	0.217257	484.4	0.359289	0.167524	0.0619366	422	0.737862	0.246586	0.0756534	414.4	0.633492	0.346719	0.117723	414.4	0.391586	0.119202	0.0320186	414.4	0.204867	0.0649249	0.0230518
414.6	1.15503	0.54123	0.217206	484.6	0.359481	0.167465	0.0617341	422.2	0.737693	0.246371	0.0753833	414.6	0.6335	0.346304	0.117247	414.6	0.391995	0.119325	0.0323049	414.6	0.204901	0.0649012	0.0230485
414.8	1.15472	0.540636	0.216833	484.8	0.359131	0.167434	0.0620353	422.4	0.737684	0.246727	0.0756954	414.8	0.633798	0.346769	0.117359	414.8	0.392187	0.119186	0.0319632	414.8	0.204466	0.0650821	0.0231474
415	1.15442	0.540074	0.217391	485	0.359268	0.167935	0.061863	422.6	0.737797	0.246981	0.0755542	415	0.633775	0.347234	0.117676	415	0.392583	0.119467	0.0316589	415	0.204766	0.065768	0.0237341
415.2	1.15429	0.539668	0.216839	485.2	0.359642	0.168275	0.061588	422.8	0.73761	0.247154	0.0751157	415.2	0.63361	0.346842	0.116945	415.2	0.392448	0.118942	0.0310558	415.2	0.204705	0.0660021	0.023736
415.4	1.15472	0.539745	0.216661	485.4	0.359452	0.168146	0.0608431	423	0.737536	0.247281	0.0752728	415.4	0.633436	0.346671	0.116047	415.4	0.393017	0.119025	0.0305064	415.4	0.204541	0.0657318	0.0240343
415.6	1.15502	0.539668	0.216726	485.6	0.359807	0.168413	0.061302	423.2	0.737274	0.247722	0.0753826	415.6	0.633957	0.347	0.115932	415.6	0.393298	0.119198	0.0305264	415.6	0.204581	0.0654526	0.0243021
415.8	1.15548	0.539878	0.216775	485.8	0.359751	0.167928	0.0614584	423.4	0.736601	0.247543	0.075583	415.8	0.633838	0.347153	0.115977	415.8	0.393829	0.119358	0.0304778	415.8	0.20439	0.0659973	0.024516
416	1.15597	0.539353	0.216733	486	0.36024	0.167763	0.0620036	423.6	0.736296	0.247271	0.0754726	416	0.634496	0.347652	0.116184	416	0.393937	0.119906	0.030536	416	0.204611	0.0660082	0.0247577
416.2	1.15576	0.539216	0.216317	486.2	0.360195	0.167817	0.0623967	423.8	0.736671	0.247676	0.0756468	416.2	0.634639	0.348151	0.11634	416.2	0.393663	0.120025	0.0306989	416.2	0.204235	0.0659085	0.0242649
416.4	1.15613	0.539517	0.216675	486.4	0.360715	0.168355	0.0625795	424	0.737171	0.247924	0.0758708	416.4	0.634408	0.348232	0.11691	416.4	0.393771	0.119849	0.0308589	416.4	0.204338	0.0659119	0.0240797
416.6	1.15633	0.539624	0.216734	486.6	0.360692	0.16815	0.0624568	424.2	0.737145	0.24837	0.0762601	416.6	0.634789	0.348514	0.11678	416.6	0.394166	0.120236	0.0310806	416.6	0.204321	0.0659595	0.0240746
416.8	1.15675	0.539515	0.217255	486.8	0.36164	0.16824	0.0624718	424.4	0.737616	0.248664	0.0771278	416.8	0.635403	0.349072	0.116666	416.8	0.393455	0.120188	0.0309594	416.8	0.204605	0.0662356	0.0236238
417	1.15716	0.539623	0.217783	487	0.361457	0.167609	0.0623124	424.6	0.737684	0.24881	0.0774284	417	0.634898	0.348785	0.116026	417	0.393605	0.120727	0.0312416	417	0.205223	0.0664193	0.0243124
417.2	1.15715	0.540142	0.218306	487.2	0.361337	0.167398	0.0623777	424.8	0.738186	0.249358	0.0783934	417.2	0.635339	0.349177	0.116759	417.2	0.3934	0.120779	0.0309762	417.2	0.205801	0.066319	0.0244872
417.4	1.1575	0.541076	0.219076	487.4	0.361826	0.167575	0.0621826	425	0.738485	0.249622	0.0785702	417.4	0.635651	0.34947	0.117167	417.4	0.393665	0.121418	0.0312621	417.4	0.206107	0.066177	0.0242768
417.6	1.15848	0.541854	0.219874	487.6	0.361847	0.167304	0.0623037	425.2	0.739257	0.249825	0.0788803	417.6	0.63568	0.350132	0.11703	417.6	0.393664	0.121185	0.0313207	417.6	0.206148	0.0662739	0.024197
417.8	1.15848	0.54221	0.220391	487.8	0.361742	0.167508	0.0622816	425.4	0.739699	0.249799	0.0785706	417.8	0.635872	0.350321	0.117306	417.8	0.394227	0.121966	0.0318263	417.8	0.206317	0.0660641	0.0242854
418	1.158	0.542538	0.220847	488	0.361566	0.167836	0.062231	425.6	0.739805	0.249867	0.0787008	418	0.636038	0.350829	0.117601	418	0.394623	0.121902	0.0312688	418	0.206347	0.0663722	0.0243706
418.2	1.15809	0.542741	0.221164	488.2	0.361323	0.167949	0.0629767	425.8	0.739742	0.249932	0.0781632	418.2	0.636352	0.35102	0.117612	418.2	0.394836	0.122046	0.0313262	418.2	0.205638	0.0661737	0.0245432
418.4	1.15833	0.543212	0.221107	488.4	0.361704	0.168095	0.0629174	426	0.739773	0.250316	0.0777616	418.4	0.636774	0.351293	0.117406	418.4	0.394852	0.122041	0.0313763	418.4	0.205549	0.0664326	0.0249029
418.6	1.15858	0.54329	0.2211	488.6	0.360976	0.168147	0.0626923	426.2	0.740241	0.250452	0.0779733	418.6	0.637135	0.351237	0.117351	418.6	0.395385	0.122105	0.0316522	418.6	0.205278	0.066172	0.024497
418.8	1.15895	0.54348	0.220785	488.8	0.361035	0.168871	0.0630485	426.4	0.7411	0.250699	0.078122	418.8	0.636908	0.351193	0.117115	418.8	0.395179	0.121841	0.031015	418.8	0.204939	0.0657688	0.0248527
419	1.15951	0.543802	0.221063	489	0.360933	0.169113	0.0630495	426.6	0.741658	0.250657	0.0784854	419	0.637015	0.351504	0.117069	419	0.395751	0.1223	0.0310242	419	0.20504	0.0655297	0.0247767
419.2	1.15943	0.543814	0.220033	489.2	0.361316	0.169103	0.0633096	426.8	0.741795	0.250579	0.0784523	419.2	0.637481	0.351229	0.116464	419.2	0.395366	0.121372	0.0304811	419.2	0.204744	0.0651027	0.0243549
419.4	1.15973	0.543261	0.219699	489.4	0.361268	0.169237	0.0633863	427	0.742151	0.250788	0.0784608	419.4	0.637992	0.351685	0.116962	419.4	0.395675	0.121065	0.0303222	419.4	0.204788	0.0651689	0.024354
419.6	1.16055	0.543112	0.219711	489.6	0.361833	0.169628	0.0644218	427.2	0.742267	0.251042	0.0779362	419.6	0.638306	0.351743	0.117058	419.6	0.395507	0.120915	0.0308101	419.6	0.204875	0.0650693	0.0240312
419.8	1.16135	0.542943	0.219768	489.8	0.361692	0.169813	0.0650486	427.4	0.742322	0.251282	0.0785707	419.8	0.638167	0.351247	0.116928	419.8	0.395475	0.120513	0.031105	419.8	0.204286	0.0646812	0.0237702
420	1.1609	0.541974	0.219247	490	0.362315	0.170069	0.0656104	427.6	0.742268	0.250836	0.0777858	420	0.638742	0.351733	0.118006	420	0.395133	0.120192	0.030923	420	0.203832	0.0632046	0.0228989
420.2	1.16066	0.542193	0.218963	490.2	0.361769	0.169759	0.0655844	427.8	0.742229	0.250372	0.0774003	420.2	0.638358	0.35164	0.118389	420.2	0.394631	0.119833	0.0308858	420.2	0.202993	0.0624448	0.0223791
420.4	1.16074	0.542345	0.219284	490.4	0.362343	0.170036	0.0656913	428	0.742069	0.250472	0.0774702	420.4	0.638801	0.352078	0.118959	420.4	0.394588	0.119245	0.0303868	420.4	0.203402	0.062256	0.0227049
420.6	1.16094	0.542302	0.219227	490.6	0.362218	0.170014	0.065379	428.2	0.741661	0.250486	0.077519	420.6	0.638559	0.351595	0.118422	420.6	0.395122	0.119836	0.0307405	420.6	0.203971	0.0621331	0.0229413
420.8	1.16051	0.542417	0.219361	490.8	0.362859	0.170138	0.0656721	428.4	0.741563	0.250176	0.0776071	420.8	0.638796	0.351375	0.118781	420.8	0.394736	0.119658	0.0309622	420.8	0.204567	0.0626085	0.0233633
421	1.16028	0.542456	0.219282	491	0.36212	0.169508	0.0651899	428.6	0.741728	0.250073	0.0773533	421	0.639192	0.351358	0.119467	421	0.396017	0.120698	0.0317654	421	0.205077	0.0623598	0.0238349
421.2	1.16046	0.542805	0.219355	491.2	0.361646	0.16949	0.064737	428.8	0.74216	0.25001	0.0773594	421.2	0.639895	0.351976	0.120453	421.2	0.396187	0.120615	0.031654	421.2	0.205357	0.0624244	0.0234959
421.4	1.16048	0.543517	0.219669	491.4	0.36155	0.169646	0.0647474	429	0.742145	0.249437	0.0773372	421.4	0.640162	0.352551	0.120977	421.4	0.396473	0.121565	0.0321346	421.4	0.204837	0.0621577	0.0228123
421.6	1.1606	0.543926	0.219725	491.6	0.360617	0.169647	0.0644381	429.2	0.742672	0.249662	0.0777897	421.6	0.640243	0.352762	0.121069	421.6	0.396478	0.121618	0.0322728	421.6	0.204722	0.0621953	0.0230143
421.8	1.16024	0.544333	0.219676	491.8	0.360515	0.169877	0.0636628	429.4	0.742356	0.249157	0.0778227	421.8	0.640764	0.353168	0.121132	421.8	0.397125	0.122482	0.032527	421.8	0.204465	0.0629027	0.023022
422	1.16053	0.544884	0.219924	492	0.360481	0.170088	0.0637675	429.6	0.742075	0.249677	0.0781441	422	0.641018	0.353421	0.120961	422	0.39752	0.122796	0.0322649	422	0.204716	0.0638028	0.023084
422.2	1.16127	0.54543	0.220298	492.2	0.360267	0.169821	0.0637238	429.8	0.742104	0.24987	0.0777172	422.2	0.640939	0.353353	0.120766	422.2	0.39808	0.123657	0.0328501	422.2	0.204645	0.0636699	0.0230851
422.4	1.16173	0.545759	0.220343	492.4	0.360314	0.16926	0.0629946	430	0.742506	0.250044	0.0780893	422.4	0.640428	0.35288	0.120346	422.4	0.398096	0.124139	0.032927	422.4	0.204552	0.0637338	0.0228297
422.6	1.16253	0.54672	0.220677	492.6	0.360062	0.169046	0.0625048	430.2	0.743265	0.250448	0.0784269	422.6	0.640668	0.353641	0.120837	422.6	0.39954	0.124996	0.0337109	422.6	0.203826	0.0632649	0.0223746
422.8	1.16274	0.547074	0.220458	492.8	0.360622	0.168681	0.0623433	430.4	0.743878	0.250658	0.0784023	422.8	0.640509	0.354096	0.120812	422.8	0.399815	0.125252	0.0335639	422.8	0.203554	0.0632227	0.0224858
423	1.16283	0.547405	0.220431	493	0.361031	0.168611	0.0622969	430.6	0.744344	0.250821	0.0783753	423	0.64068	0.35423	0.121055	423	0.400397	0.125647	0.0336973	423	0.203326	0.0633867	0.0225021
423.2	1.16277	0.547007	0.219637	493.2	0.361106	0.168556	0.0620131	430.8	0.744588	0.251435	0.078245	423.2	0.6406	0.353889	0.120261	423.2	0.400473	0.124843	0.0331487	423.2	0.203049	0.0637644	0.0222336
423.4	1.1634	0.546793	0.219523	493.4	0.361628	0.16897	0.0622586	431	0.744589	0.251444	0.0780526	423.4	0.64032	0.353496	0.11997	423.4	0.400796	0.124734	0.0331383	423.4	0.202869	0.0641629	0.0221002
423.6	1.16392	0.547008	0.220099	493.6	0.36215	0.169163	0.0624435	431.2	0.74462	0.251821	0.0778045	423.6	0.640274	0.353138	0.119396	423.6	0.400578	0.124862	0.0336621	423.6	0.202853	0.0644767	0.0226869
423.8	1.16374	0.546934	0.220282	493.8	0.362553	0.169399	0.0627154	431.4	0.744552	0.252797	0.0781244	423.8	0.640178	0.353124	0.119542	423.8	0.400406	0.124402	0.033021	423.8	0.202572	0.0647207	0.0233508
424	1.16365	0.54643	0.220185	494	0.363291	0.169434	0.0630473	431.6	0.743929	0.252461	0.0771681	424	0.640357	0.353698	0.120122	424	0.400147	0.124006	0.0325167	424	0.202787	0.0649877	0.0237344
424.2	1.16411	0.546484	0.219955	494.2	0.363164	0.169382	0.0631486	431.8	0.743842	0.252808	0.0770158	424.2	0.640096	0.353239	0.119425	424.2	0.4004	0.123709	0.032793	424.2	0.202883	0.0653668	0.0239032
424.4	1.16471	0.546467	0.220501	494.4	0.364019	0.170066	0.063204	432	0.74361	0.253251	0.0768371	424.4	0.640367	0.353251	0.11955	424.4	0.401136	0.123848	0.0329828	424.4	0.203208	0.0653932	0.0240483
424.6	1.16467	0.5462	0.220554	494.6	0.364214	0.170745	0.0631135	432.2	0.74355	0.253363	0.0769663	424.6	0.640127	0.352994	0.119343	424.6	0.400975	0.123636	0.0330907	424.6	0.203487	0.0657165	0.0240435
424.8	1.16475	0.545798	0.220726	494.8	0.364767	0.170789	0.0631334	432.4	0.743907	0.252969	0.0773278	424.8	0.64063	0.353225	0.120298	424.8	0.400866	0.123266	0.0332983	424.8	0.203571	0.0658645	0.0238453
425	1.16543	0.545462	0.221214	495	0.364831	0.171154	0.0631071	432.6	0.743843	0.253062	0.077207	425	0.641297	0.354127	0.120559	425	0.401221	0.123613	0.0341172	425	0.203805	0.0655301	0.0231942
425.2	1.1656	0.545728	0.221147	495.2	0.364687	0.171686	0.0632074	432.8	0.744481	0.252739	0.0778784	425.2	0.641579	0.354568	0.120458	425.2	0.400847	0.123102	0.0338882	425.2	0.203664	0.0652412	0.022451
425.4	1.1657	0.545814	0.220963	495.4	0.364558	0.171785	0.0633017	433	0.744657	0.252696	0.0786606	425.4	0.641889	0.355053	0.120275	425.4	0.400965	0.123998	0.0347728	425.4	0.203292	0.0651366	0.022714
425.6	1.1656	0.545971	0.220858	495.6	0.364536	0.172019	0.0630806	433.2	0.744855	0.252697	0.0788777	425.6	0.642592	0.355573	0.120622	425.6	0.400908	0.124035	0.0348939	425.6	0.203902	0.0651922	0.0231923
425.8	1.16504	0.545432	0.221242	495.8	0.365696	0.172133	0.063552	433.4	0.744796	0.252565	0.0793007	425.8	0.643105	0.355485	0.120463	425.8	0.401068	0.124308	0.034877	425.8	0.204247	0.0656259	0.0230533
426	1.16545	0.545685	0.221561	496	0.365744	0.172037	0.0639337	433.6	0.745604	0.253021	0.0798139	426	0.642998	0.35557	0.120515	426	0.40141	0.124618	0.0349958	426	0.204929	0.0652999	0.0229008
426.2	1.16556	0.545739	0.221857	496.2	0.365885	0.171524	0.0642884	433.8	0.74602	0.252941	0.0792819	426.2	0.643167	0.355735	0.120618	426.2	0.401906	0.125038	0.0348434	426.2	0.204753	0.0646617	0.0220514
426.4	1.16569	0.545643	0.221677	496.4	0.365755	0.171231	0.0644606	434	0.746657	0.253277	0.0794929	426.4	0.643369	0.356179	0.120968	426.4	0.401987	0.124859	0.0345116	426.4	0.204477	0.0647183	0.0219807
426.6	1.16627	0.546388	0.221844	496.6	0.366186	0.171598	0.064811	434.2	0.747329	0.253635	0.079591	426.6	0.644076	0.356978	0.121477	426.6	0.402986	0.125172	0.0345392	426.6	0.204447	0.0642198	0.0220031
426.8	1.16613	0.5467	0.221571	496.8	0.366332	0.171686	0.0653243	434.4	0.747349	0.253242	0.0794712	426.8	0.644195	0.356559	0.121167	426.8	0.402622	0.125216	0.0337559	426.8	0.204889	0.0649811	0.0228728
427	1.16631	0.547032	0.221353	497	0.366308	0.172071	0.0656835	434.6	0.747929	0.253608	0.0798116	427	0.644432	0.356164	0.120811	427	0.402669	0.124965	0.0332752	427	0.204423	0.0648714	0.0226538
427.2	1.16606	0.547404	0.221357	497.2	0.365862	0.172143	0.0656446	434.8	0.748048	0.253859	0.0796382	427.2	0.644565	0.356157	0.120257	427.2	0.402772	0.124628	0.0328563	427.2	0.204586	0.0648073	0.0227327
427.4	1.16597	0.548371	0.221776	497.4	0.366133	0.171678	0.0660768	435	0.747251	0.253336	0.0790377	427.4	0.644964	0.356376	0.120672	427.4	0.402042	0.124141	0.0321329	427.4	0.204935	0.064757	0.0234303
427.6	1.16619	0.548597	0.222341	497.6	0.365786	0.17103	0.0657082	435.2	0.746465	0.253209	0.0783617	427.6	0.64522	0.356839	0.121026	427.6	0.40205	0.124275	0.0320923	427.6	0.205239	0.0646636	0.024203
427.8	1.16624	0.549051	0.222496	497.8	0.365713	0.170897	0.0659236	435.4	0.746134	0.253261	0.0782064	427.8	0.645283	0.357081	0.121339	427.8	0.402499	0.124183	0.0317347	427.8	0.205372	0.0649747	0.0244442
428	1.16691	0.549194	0.222768	498	0.364962	0.170459	0.065997	435.6	0.746009	0.253064	0.0773505	428	0.644871	0.356895	0.120843	428	0.403074	0.124488	0.0320471	428	0.205464	0.0647367	0.0243573
428.2	1.16707	0.549548	0.223249	498.2	0.364909	0.170725	0.0655782	435.8	0.746157	0.253678	0.0776618	428.2	0.645077	0.35672	0.120902	428.2	0.403768	0.124686	0.0324111	428.2	0.20548	0.0643791	0.0243929
428.4	1.16773	0.549958	0.223887	498.4	0.365015	0.170984	0.0646033	436	0.745948	0.253342	0.0773677	428.4	0.644729	0.356317	0.12113	428.4	0.404237	0.124755	0.0320346	428.4	0.204745	0.0640711	0.0244672
428.6	1.16844	0.550433	0.224333	498.6	0.364506	0.171038	0.0639072	436.2	0.745888	0.25324	0.0776796	428.6	0.645032	0.356863	0.121447	428.6	0.404075	0.124186	0.0317113	428.6	0.204567	0.0642969	0.0243126
428.8	1.16926	0.550679	0.224706	498.8	0.363999	0.170446	0.0634235	436.4	0.745705	0.253097	0.0777537	428.8	0.645785	0.35728	0.122542	428.8	0.404986	0.125104	0.0323337	428.8	0.204024	0.0640333	0.0238505
429	1.16957	0.550968	0.224815	499	0.363652	0.170623	0.0630715	436.6	0.745406	0.252691	0.0776605	429	0.646111	0.358138	0.122611	429	0.405215	0.125302	0.0328162	429	0.203785	0.0635538	0.0236892
429.2	1.17018	0.551787	0.224443	499.2	0.363414	0.170655	0.062349	436.8	0.745563	0.252414	0.0778212	429.2	0.646167	0.358005	0.12236	429.2	0.405563	0.12586	0.0327198	429.2	0.203798	0.0635682	0.0240965
429.4	1.17052	0.551756	0.224779	499.4	0.363401	0.170076	0.062121	437	0.745826	0.252731	0.0783887	429.4	0.646448	0.358443	0.122604	429.4	0.406557	0.126628	0.0336319	429.4	0.204133	0.0637427	0.024588
429.6	1.17008	0.551676	0.224977	499.6	0.363242	0.169548	0.0620392	437.2	0.74643	0.252536	0.0788838	429.6	0.64674	0.358396	0.122931	429.6	0.40698	0.126505	0.0336299	429.6	0.204163	0.0638428	0.0244492
429.8	1.17022	0.551326	0.225122	499.8	0.363363	0.169123	0.0621375	437.4	0.746739	0.253079	0.0793325	429.8	0.646858	0.358101	0.122774	429.8	0.407482	0.126276	0.0334363	429.8	0.20429	0.0640086	0.0235037
430	1.17091	0.551316	0.224611	500	0.363496	0.168901	0.0617752	437.6	0.747521	0.253529	0.0797076	430	0.646928	0.358771	0.122952	430	0.408074	0.126564	0.0336653	430	0.203944	0.0635984	0.0231496
430.2	1.17146	0.551118	0.224546	500.2	0.363881	0.169098	0.0622223	437.8	0.747998	0.254252	0.0800567	430.2	0.647324	0.358561	0.122765	430.2	0.408378	0.126172	0.0334947	430.2	0.203555	0.0635478	0.0227171
430.4	1.17228	0.550742	0.224351	500.4	0.364	0.169473	0.0623123	438	0.74834	0.254255	0.0804304	430.4	0.647253	0.358596	0.12238	430.4	0.408329	0.125902	0.0331253	430.4	0.203292	0.0641858	0.0227617
430.6	1.17265	0.551064	0.224497	500.6	0.364714	0.169927	0.0626605	438.2	0.748487	0.254247	0.0808422	430.6	0.647241	0.358546	0.1221	430.6	0.407874	0.125331	0.0323983	430.6	0.203416	0.0641613	0.0224171
430.8	1.17281	0.551441	0.224306	500.8	0.364942	0.169703	0.0627091	438.4	0.748135	0.253736	0.0806042	430.8	0.647129	0.358469	0.121551	430.8	0.407155	0.124781	0.0320228	430.8	0.203939	0.064637	0.0227022
431	1.17245	0.551099	0.223658	501	0.36532	0.169735	0.0630927	438.6	0.748811	0.254455	0.0807571	431	0.646802	0.358361	0.121462	431	0.406887	0.124256	0.0319291	431	0.203506	0.0636607	0.0221555
431.2	1.17203	0.55076	0.223333	501.2	0.365849	0.170052	0.063091	438.8	0.747841	0.253778	0.0796448	431.2	0.646708	0.358146	0.121633	431.2	0.40676	0.123852	0.0316462	431.2	0.204009	0.0634756	0.0227146
431.4	1.17233	0.551105	0.223214	501.4	0.366274	0.170087	0.063828	439	0.746984	0.253272	0.0789051	431.4	0.646794	0.358339	0.121816	431.4	0.406497	0.123934	0.0318209	431.4	0.203938	0.0636383	0.0228427
431.6	1.1728	0.550545	0.223117	501.6	0.366763	0.170637	0.0640379	439.2	0.746661	0.252664	0.0782476	431.6	0.646478	0.358065	0.12156	431.6	0.407272	0.124315	0.0326564	431.6	0.204015	0.0636989	0.022799
431.8	1.17283	0.550736	0.223068	501.8	0.367142	0.171295	0.0646599	439.4	0.747114	0.253051	0.0780991	431.8	0.646016	0.358021	0.12155	431.8	0.407534	0.124424	0.0328419	431.8	0.204049	0.0638514	0.0226892
432	1.17287	0.550938	0.223144	502	0.367414	0.171645	0.0648666	439.6	0.747388	0.25335	0.0776683	432	0.645394	0.357553	0.121281	432	0.407847	0.124328	0.0330961	432	0.203903	0.0633434	0.0227946
432.2	1.17329	0.55126	0.223626	502.2	0.368513	0.172673	0.065339	439.8	0.747165	0.253478	0.0776777	432.2	0.645895	0.357713	0.121499	432.2	0.408074	0.124446	0.0329607	432.2	0.204229	0.063859	0.0234248
432.4	1.17397	0.551494	0.223818	502.4	0.368867	0.172999	0.0655674	440	0.746928	0.253052	0.0771674	432.4	0.646014	0.358023	0.12168	432.4	0.407756	0.124356	0.0329897	432.4	0.203932	0.0638239	0.0234604
432.6	1.17431	0.551985	0.223928	502.6	0.369393	0.173598	0.0659771	440.2	0.747003	0.253428	0.0775691	432.6	0.646583	0.35895	0.122359	432.6	0.407173	0.124467	0.032753	432.6	0.204278	0.064131	0.0236633
432.8	1.17475	0.552456	0.224494	502.8	0.369517	0.173651	0.0660339	440.4	0.747097	0.253623	0.0777607	432.8	0.647297	0.359303	0.123291	432.8	0.40734	0.124523	0.0330689	432.8	0.204438	0.0642014	0.0239836
433	1.17519	0.553328	0.22465	503	0.369929	0.173896	0.0658674	440.6	0.74722	0.253265	0.0776044	433	0.647599	0.359732	0.123576	433	0.40704	0.124381	0.033333	433	0.205118	0.0642744	0.0245064
433.2	1.17538	0.553917	0.224681	503.2	0.370333	0.173874	0.0660599	440.8	0.747593	0.253859	0.0778935	433.2	0.648005	0.359927	0.123563	433.2	0.40703	0.124186	0.0334717	433.2	0.205454	0.0642768	0.0249102
433.4	1.17557	0.554154	0.225303	503.4	0.369927	0.17316	0.0660578	441	0.748422	0.253608	0.078358	433.4	0.648722	0.360806	0.124437	433.4	0.407134	0.123502	0.0339064	433.4	0.205698	0.0641717	0.0252954
433.6	1.17544	0.554221	0.224809	503.6	0.369738	0.172603	0.0656268	441.2	0.748835	0.253375	0.0787821	433.6	0.648761	0.360718	0.12474	433.6	0.407217	0.123366	0.0340871	433.6	0.205386	0.0639958	0.0253103
433.8	1.1754	0.554477	0.224727	503.8	0.369954	0.172932	0.065852	441.4	0.749175	0.253527	0.0788309	433.8	0.649175	0.361366	0.12506	433.8	0.407401	0.123251	0.0343778	433.8	0.205119	0.0635044	0.0248847
434	1.17633	0.554855	0.225243	504	0.369577	0.172685	0.0652255	441.6	0.749923	0.253643	0.0794764	434	0.64952	0.361502	0.125089	434	0.40709	0.123409	0.0343746	434	0.204777	0.0630768	0.0249655
434.2	1.17675	0.555335	0.226073	504.2	0.368696	0.172785	0.0647453	441.8	0.750264	0.253638	0.079973	434.2	0.64986	0.361545	0.125107	434.2	0.407069	0.122947	0.0339383	434.2	0.204167	0.0632572	0.0242726
434.4	1.17656	0.555421	0.226351	504.4	0.368217	0.172724	0.0645104	442	0.750239	0.253386	0.0799576	434.4	0.649842	0.361694	0.124457	434.4	0.40685	0.122248	0.0333074	434.4	0.203357	0.063781	0.0234203
434.6	1.17624	0.555859	0.226602	504.6	0.368163	0.172445	0.0643806	442.2	0.75008	0.253247	0.0800293	434.6	0.64968	0.361568	0.124552	434.6	0.406428	0.12221	0.0327206	434.6	0.20309	0.0631179	0.0230379
434.8	1.17589	0.555681	0.226652	504.8	0.368501	0.172386	0.0644115	442.4	0.750196	0.25317	0.0798381	434.8	0.649431	0.361385	0.124698	434.8	0.406827	0.12258	0.0328052	434.8	0.203158	0.0631304	0.0232257
435	1.17526	0.555078	0.226416	505	0.368218	0.172912	0.0644713	442.6	0.750681	0.253373	0.0799072	435	0.649065	0.361396	0.124885	435	0.40733	0.123814	0.0326018	435	0.202497	0.0631787	0.02321
435.2	1.17502	0.554813	0.226931	505.2	0.367777	0.173378	0.0637857	442.8	0.75018	0.253392	0.079162	435.2	0.649154	0.361295	0.125195	435.2	0.407935	0.124359	0.032623	435.2	0.20197	0.0634772	0.0228709
435.4	1.17509	0.555014	0.226879	505.4	0.367567	0.173313	0.0642093	443	0.750567	0.253476	0.079322	435.4	0.649177	0.362174	0.125165	435.4	0.408466	0.124956	0.0327709	435.4	0.201277	0.0639977	0.0224908
435.6	1.17483	0.55419	0.226833	505.6	0.367599	0.173498	0.0642074	443.2	0.750642	0.253831	0.0795334	435.6	0.64918	0.362704	0.125168	435.6	0.408846	0.12537	0.0324777	435.6	0.200966	0.0637841	0.022306
435.8	1.17463	0.554394	0.226891	505.8	0.367563	0.173682	0.0645022	443.4	0.750851	0.254116	0.0798146	435.8	0.649019	0.363081	0.125449	435.8	0.40981	0.126555	0.0322601	435.8	0.200995	0.0635321	0.0219673
436	1.17468	0.554532	0.22716	506	0.368332	0.173964	0.0646345	443.6	0.751048	0.254988	0.0796347	436	0.648806	0.362756	0.125431	436	0.410212	0.127224	0.0321385	436	0.201004	0.0636441	0.0221758
436.2	1.17504	0.554428	0.227581	506.2	0.368554	0.174197	0.0649467	443.8	0.751278	0.255819	0.0801351	436.2	0.649493	0.363092	0.125532	436.2	0.410152	0.127993	0.032012	436.2	0.201612	0.0645504	0.0223811
436.4	1.17488	0.554139	0.227125	506.4	0.36836	0.174024	0.0643229	444	0.75184	0.256609	0.0806146	436.4	0.649841	0.363704	0.125996	436.4	0.410308	0.128492	0.0323526	436.4	0.201503	0.064176	0.0219263
436.6	1.17519	0.554718	0.227384	506.6	0.368426	0.17426	0.0642228	444.2	0.752582	0.257915	0.0809919	436.6	0.650247	0.363763	0.126378	436.6	0.410584	0.128609	0.0325401	436.6	0.201846	0.0642735	0.0219559
436.8	1.17554	0.55547	0.227314	506.8	0.368369	0.17441	0.0645049	444.4	0.752933	0.258218	0.0810756	436.8	0.650423	0.363503	0.12633	436.8	0.411214	0.128996	0.0331337	436.8	0.201983	0.0636952	0.0216223
437	1.17549	0.555759	0.227301	507	0.368306	0.174091	0.064233	444.6	0.753071	0.258048	0.0805325	437	0.6503	0.363461	0.126431	437	0.410842	0.128398	0.0330901	437	0.202209	0.0636933	0.0219725
437.2	1.17521	0.555804	0.226705	507.2	0.368526	0.174378	0.0644878	444.8	0.753708	0.258321	0.0807334	437.2	0.650342	0.364396	0.126265	437.2	0.41121	0.128162	0.0333816	437.2	0.202734	0.0634985	0.0220125
437.4	1.17594	0.556028	0.226746	507.4	0.368342	0.173898	0.0644151	445	0.753706	0.258086	0.080463	437.4	0.650497	0.365071	0.126536	437.4	0.41178	0.128301	0.0338267	437.4	0.20321	0.0635879	0.0219354
437.6	1.17635	0.556377	0.226303	507.6	0.368059	0.173905	0.0640065	445.2	0.753759	0.257718	0.0804819	437.6	0.650429	0.364855	0.126423	437.6	0.411976	0.128674	0.0341453	437.6	0.20351	0.0634645	0.0217349
437.8	1.17668	0.556421	0.226306	507.8	0.367888	0.174254	0.0640739	445.4	0.75367	0.257591	0.0802117	437.8	0.650586	0.365179	0.126399	437.8	0.41171	0.127937	0.0343216	437.8	0.203596	0.0636701	0.0215134
438	1.1775	0.556453	0.226444	508	0.367516	0.174143	0.0638143	445.6	0.753431	0.257417	0.0801276	438	0.650461	0.364722	0.126183	438	0.41143	0.127372	0.0342266	438	0.203569	0.0639861	0.021384
438.2	1.17732	0.556424	0.226216	508.2	0.367528	0.174217	0.0640988	445.8	0.753115	0.257172	0.0799381	438.2	0.650452	0.364464	0.126031	438.2	0.411687	0.126713	0.0343172	438.2	0.203084	0.0641736	0.0212032
438.4	1.1774	0.556452	0.226129	508.4	0.367778	0.174108	0.0647117	446	0.752925	0.256917	0.0800328	438.4	0.650187	0.36393	0.125293	438.4	0.411591	0.126196	0.0343981	438.4	0.202969	0.0643046	0.0212703
438.6	1.17771	0.556436	0.226206	508.6	0.367941	0.173835	0.0651147	446.2	0.752707	0.256469	0.0798302	438.6	0.649817	0.363591	0.125543	438.6	0.411603	0.126348	0.0343531	438.6	0.202973	0.0639802	0.0214348
438.8	1.17765	0.556448	0.226351	508.8	0.367927	0.173872	0.0658126	446.4	0.752715	0.255963	0.0797654	438.8	0.64968	0.363763	0.125574	438.8	0.411872	0.126175	0.0344109	438.8	0.203041	0.0642226	0.0217443
439	1.178	0.556464	0.226444	509	0.367422	0.173791	0.0663652	446.6	0.752466	0.25559	0.0797309	439	0.649707	0.36399	0.125469	439	0.412157	0.126359	0.0344006	439	0.202429	0.0639949	0.021766
439.2	1.17817	0.556508	0.226602	509.2	0.36734	0.173542	0.0669803	446.8	0.752241	0.255596	0.0798338	439.2	0.649749	0.363925	0.125548	439.2	0.412568	0.125995	0.0345761	439.2	0.201897	0.0635131	0.0215976
439.4	1.17863	0.55676	0.226392	509.4	0.367534	0.173316	0.0680407	447	0.752206	0.255059	0.080199	439.4	0.650003	0.364348	0.125388	439.4	0.412721	0.125808	0.0342582	439.4	0.201417	0.0632458	0.0217024
439.6	1.17888	0.556812	0.226675	509.6	0.367482	0.173251	0.0687075	447.2	0.752223	0.255155	0.0804162	439.6	0.650042	0.363968	0.125343	439.6	0.412961	0.126339	0.0341276	439.6	0.201135	0.0624866	0.0215756
439.8	1.17923	0.557399	0.227032	509.8	0.367501	0.17301	0.0693156	447.4	0.752403	0.25512	0.0807161	439.8	0.649992	0.363331	0.125275	439.8	0.413662	0.127001	0.03433	439.8	0.201226	0.0620572	0.0215315
440	1.17923	0.557399	0.227032	510	0.367501	0.17301	0.0693156	447.6	0.752403	0.25512	0.0807161	440	0.649992	0.363331	0.125275	440	0.413662	0.127001	0.03433	440	0.201226	0.0620572	0.0215315
440.2	1.17349	0.554882	0.225571	510.2	0.361883	0.170735	0.0692814	447.8	0.751336	0.25486	0.0807763	440.2	0.648786	0.36239	0.124901	440.2	0.412806	0.126315	0.0344086	440.2	0.198692	0.0609175	0.0208425
440.4	1.16707	0.552029	0.223869	510.4	0.356039	0.168169	0.0687647	448	0.749707	0.253636	0.0803123	440.4	0.64759	0.361023	0.124524	440.4	0.411488	0.125242	0.0343716	440.4	0.195413	0.059548	0.0198261
440.6	1.16065	0.549291	0.221987	510.6	0.349614	0.165176	0.0678383	448.2	0.748115	0.252999	0.0798064	440.6	0.646397	0.360175	0.124299	440.6	0.410451	0.124905	0.0344971	440.6	0.192739	0.0584373	0.0194968
440.8	1.15364	0.545742	0.21998	510.8	0.343056	0.162132	0.067265	448.4	0.746366	0.251862	0.0796468	440.8	0.645676	0.359744	0.124366	440.8	0.40943	0.124593	0.0348629	440.8	0.188699	0.0567109	0.0180807
441	1.14628	0.542547	0.218149	511	0.335951	0.158799	0.0661802	448.6	0.744274	0.250555	0.079415	441	0.644008	0.358459	0.123829	441	0.40843	0.124224	0.0353473	441	0.184467	0.0549029	0.0175567
441.2	1.13967	0.539728	0.216397	511.2	0.329081	0.155627	0.0650485	448.8	0.741932	0.249629	0.078783	441.2	0.642576	0.357108	0.123514	441.2	0.407413	0.124205	0.0354902	441.2	0.180731	0.0534825	0.0167336
441.4	1.13337	0.537198	0.21472	511.4	0.323014	0.152903	0.0646194	449	0.739664	0.248834	0.0784348	441.4	0.641173	0.356024	0.123025	441.4	0.406446	0.124001	0.0359756	441.4	0.177032	0.0524694	0.0165529
441.6	1.12746	0.534432	0.213056	511.6	0.317216	0.150613	0.0642279	449.2	0.737525	0.248474	0.0781022	441.6	0.639804	0.355503	0.123035	441.6	0.405661	0.123974	0.0365202	441.6	0.173082	0.051898	0.0160931
441.8	1.12221	0.531987	0.211621	511.8	0.31203	0.148217	0.0633906	449.4	0.734922	0.247551	0.0773454	441.8	0.638281	0.354505	0.122824	441.8	0.404695	0.123508	0.0366006	441.8	0.169618	0.0510822	0.0158305
442	1.11797	0.530142	0.210327	512	0.30776	0.146407	0.0628024	449.6	0.732261	0.247025	0.0767385	442	0.637532	0.353697	0.122664	442	0.403741	0.122717	0.0369799	442	0.166401	0.0501476	0.0158469
442.2	1.115	0.528704	0.209489	512.2	0.304701	0.145304	0.0622899	449.8	0.729995	0.246455	0.0759334	442.2	0.63676	0.353764	0.12286	442.2	0.403006	0.122745	0.0370106	442.2	0.163716	0.0492475	0.0153291
442.4	1.1124	0.52773	0.208765	512.4	0.301605	0.144102	0.0616974	450	0.727848	0.245502	0.0760819	442.4	0.636027	0.353383	0.123134	442.4	0.40178	0.122035	0.0361419	442.4	0.160362	0.0484112	0.0148691
442.6	1.11024	0.527243	0.208804	512.6	0.298507	0.142542	0.060875	450.2	0.725686	0.244814	0.0759873	442.6	0.63509	0.352739	0.122895	442.6	0.400704	0.121481	0.0360595	442.6	0.157393	0.0476601	0.0145135
442.8	1.10748	0.52683	0.208365	512.8	0.295938	0.141632	0.0605618	450.4	0.723862	0.244163	0.0755252	442.8	0.634007	0.352687	0.122865	442.8	0.399238	0.121306	0.0361397	442.8	0.153989	0.0468244	0.0146405
443	1.10492	0.526046	0.208033	513	0.293638	0.140568	0.06026	450.6	0.721518	0.243485	0.0760534	443	0.633747	0.352427	0.123752	443	0.397888	0.120548	0.0352391	443	0.150917	0.0453625	0.0142954
443.2	1.10209	0.524582	0.207122	513.2	0.291509	0.140408	0.0599781	450.8	0.7194	0.242599	0.0759906	443.2	0.633432	0.352435	0.124282	443.2	0.396669	0.119727	0.0348655	443.2	0.148352	0.0444854	0.0141709
443.4	1.10005	0.523999	0.206987	513.4	0.289025	0.138989	0.0597575	451	0.717339	0.241807	0.0756357	443.4	0.631796	0.351906	0.123946	443.4	0.395482	0.119548	0.0340316	443.4	0.145896	0.043532	0.0142711
443.6	1.09798	0.522856	0.206837	513.6	0.286974	0.138541	0.0590194	451.2	0.715408	0.241297	0.0760205	443.6	0.630743	0.350939	0.123223	443.6	0.394388	0.119261	0.0335526	443.6	0.143149	0.0422477	0.0138097
443.8	1.09584	0.52177	0.206004	513.8	0.284949	0.137693	0.0588609	451.4	0.714153	0.240681	0.0758469	443.8	0.629834	0.350237	0.122516	443.8	0.392605	0.118928	0.0329215	443.8	0.140188	0.0411325	0.0135421
444	1.09406	0.521407	0.206088	514	0.283136	0.136847	0.0590839	451.6	0.712286	0.240653	0.0760877	444	0.62841	0.349385	0.122297	444	0.391416	0.118278	0.0327266	444	0.137684	0.039829	0.0129954
444.2	1.09202	0.520947	0.205951	514.2	0.281441	0.135765	0.0589624	451.8	0.710468	0.240074	0.0759319	444.2	0.626912	0.348899	0.121125	444.2	0.390404	0.117524	0.0324536	444.2	0.134747	0.0386761	0.0122607
444.4	1.09031	0.520024	0.205593	514.4	0.279904	0.134673	0.0583251	452	0.708477	0.239356	0.0753888	444.4	0.626033	0.348081	0.120795	444.4	0.388903	0.117053	0.032265	444.4	0.131816	0.0378357	0.0114002
444.6	1.08857	0.518921	0.205462	514.6	0.277887	0.133937	0.0581606	452.2	0.706725	0.239012	0.0752197	444.6	0.625418	0.34785	0.120956	444.6	0.388295	0.117409	0.0323539	444.6	0.129309	0.0369368	0.0112764
444.8	1.08701	0.51788	0.20585	514.8	0.275917	0.13281	0.0578309	452.4	0.705197	0.238037	0.0755846	444.8	0.624728	0.347053	0.120722	444.8	0.387653	0.117244	0.0323678	444.8	0.125952	0.0355023	0.00998004
445	1.08549	0.517454	0.205604	515	0.274131	0.131845	0.056997	452.6	0.703349	0.237273	0.0754707	445	0.623234	0.345707	0.120164	445	0.386699	0.116825	0.0320769	445	0.123531	0.0348204	0.0106742
445.2	1.08423	0.516836	0.205072	515.2	0.272437	0.130864	0.0565433	452.8	0.701655	0.237077	0.0753754	445.2	0.621992	0.344791	0.119595	445.2	0.386146	0.11663	0.0323727	445.2	0.121597	0.0347574	0.0104101
445.4	1.08295	0.515738	0.204426	515.4	0.27117	0.129882	0.056878	453	0.699683	0.236377	0.0750161	445.4	0.620654	0.344247	0.118825	445.4	0.385519	0.116127	0.0327682	445.4	0.119583	0.0346427	0.0106001
445.6	1.08122	0.514052	0.203763	515.6	0.269204	0.129283	0.0561939	453.2	0.697525	0.235782	0.0747066	445.6	0.619581	0.344004	0.118788	445.6	0.384935	0.115838	0.0332196	445.6	0.116817	0.0338531	0.00986088
445.8	1.07991	0.513085	0.203402	515.8	0.267516	0.127916	0.0555148	453.4	0.695218	0.234875	0.0740788	445.8	0.618522	0.343278	0.118664	445.8	0.384106	0.115476	0.033043	445.8	0.115048	0.0329679	0.00958673
446	1.07849	0.512645	0.202961	516	0.266523	0.127353	0.0556514	453.6	0.693256	0.233919	0.0742069	446	0.618314	0.343447	0.11891	446	0.383309	0.114971	0.0332903	446	0.11242	0.032144	0.00877585
446.2	1.07703	0.511713	0.202684	516.2	0.26499	0.126556	0.0553193	453.8	0.69191	0.233164	0.0739434	446.2	0.617397	0.343743	0.119278	446.2	0.383016	0.115157	0.033152	446.2	0.110467	0.0316371	0.00791158
446.4	1.07554	0.511226	0.202326	516.4	0.263451	0.125743	0.0545484	454	0.689801	0.232255	0.0738395	446.4	0.616605	0.343736	0.119365	446.4	0.382651	0.114817	0.0331079	446.4	0.108425	0.0308207	0.00780801
446.6	1.07384	0.510621	0.201925	516.6	0.262047	0.124793	0.0539569	454.2	0.687672	0.231553	0.0736408	446.6	0.615832	0.343481	0.11934	446.6	0.382432	0.115139	0.0334639	446.6	0.106413	0.0300752	0.00769339
446.8	1.07192	0.510248	0.201704	516.8	0.260848	0.124359	0.0538769	454.4	0.685975	0.230461	0.0731791	446.8	0.615291	0.343657	0.119777	446.8	0.381957	0.115134	0.0336702	446.8	0.104397	0.0296597	0.00770921
447	1.06973	0.50914	0.20113	517	0.260339	0.123881	0.0538903	454.6	0.68411	0.229737	0.0732949	447	0.614878	0.343143	0.120155	447	0.382052	0.115243	0.0335142	447	0.102916	0.0291225	0.00757636
447.2	1.06797	0.508289	0.200356	517.2	0.259413	0.123763	0.0538288	454.8	0.682266	0.229049	0.0727671	447.2	0.614195	0.342969	0.119923	447.2	0.381575	0.115229	0.0334106	447.2	0.10175	0.0288195	0.00779891
447.4	1.06668	0.508367	0.199921	517.4	0.258305	0.12309	0.0533154	455	0.68008	0.228228	0.0721907	447.4	0.613448	0.342817	0.119882	447.4	0.380734	0.115128	0.0330634	447.4	0.0999702	0.0280834	0.00754404
447.6	1.06505	0.507241	0.199609	517.6	0.257893	0.123001	0.053027	455.2	0.678553	0.227572	0.0722188	447.6	0.612452	0.342494	0.119872	447.6	0.379799	0.115132	0.0329488	447.6	0.0979273	0.0274828	0.00698075
447.8	1.06355	0.506722	0.199172	517.8	0.257252	0.122835	0.0530856	455.4	0.676868	0.227039	0.0715436	447.8	0.611496	0.342105	0.119589	447.8	0.379231	0.115462	0.0331855	447.8	0.0960133	0.02635	0.00672086
448	1.06187	0.50662	0.199354	518	0.256704	0.122003	0.0536617	455.6	0.67463	0.226222	0.0710675	448	0.610514	0.341363	0.119213	448	0.378681	0.114487	0.032898	448	0.0946871	0.0255256	0.00614583
448.2	1.06086	0.505982	0.199251	518.2	0.255934	0.121282	0.0535488	455.8	0.673313	0.225419	0.0702815	448.2	0.609497	0.340173	0.118499	448.2	0.378078	0.114576	0.0331088	448.2	0.0925154	0.0250642	0.00555106
448.4	1.05937	0.504793	0.198829	518.4	0.254669	0.121409	0.0537045	456	0.670971	0.224654	0.0694036	448.4	0.609104	0.33973	0.119005	448.4	0.377462	0.114936	0.0332117	448.4	0.0909159	0.0246138	0.00539929
448.6	1.05789	0.503818	0.19871	518.6	0.253859	0.121254	0.0535909	456.2	0.668979	0.223606	0.0688508	448.6	0.608339	0.338481	0.118417	448.6	0.377372	0.114777	0.0331972	448.6	0.0890532	0.0235445	0.00519004
448.8	1.05728	0.503776	0.198878	518.8	0.252399	0.120187	0.0527827	456.4	0.667651	0.222662	0.0688876	448.8	0.607344	0.337931	0.118406	448.8	0.376485	0.11421	0.0330534	448.8	0.0878634	0.0230058	0.00537943
449	1.05595	0.503228	0.198086	519	0.251216	0.119509	0.0520384	456.6	0.665691	0.221977	0.0687325	449	0.606348	0.337288	0.118167	449	0.375685	0.113762	0.0327892	449	0.0867836	0.0225671	0.00603872
449.2	1.0546	0.502424	0.197725	519.2	0.249518	0.118465	0.0514447	456.8	0.663763	0.221466	0.0683399	449.2	0.605055	0.337041	0.117801	449.2	0.375362	0.113725	0.0333837	449.2	0.0854752	0.021849	0.00582049
449.4	1.05356	0.501867	0.197783	519.4	0.248356	0.117593	0.0511327	457	0.661921	0.220458	0.067766	449.4	0.604422	0.336603	0.117636	449.4	0.374552	0.113474	0.0335057	449.4	0.0839823	0.0206671	0.00550073
449.6	1.0525	0.501295	0.197799	519.6	0.246953	0.116969	0.0505507	457.2	0.66029	0.220422	0.0677704	449.6	0.603778	0.336368	0.117342	449.6	0.374035	0.113575	0.033892	449.6	0.082364	0.019929	0.00499986
449.8	1.05184	0.500994	0.197897	519.8	0.246316	0.11586	0.0504369	457.4	0.659065	0.2204	0.0678274	449.8	0.603081	0.336331	0.117008	449.8	0.373449	0.113476	0.0339647	449.8	0.0813141	0.02012	0.0051889
450	1.05061	0.50069	0.197726	520	0.245832	0.115317	0.0504618	457.6	0.657674	0.219865	0.0684293	450	0.60234	0.336286	0.116711	450	0.373325	0.113592	0.0347668	450	0.0800647	0.0200783	0.00504199
450.2	1.04977	0.500035	0.19745	520.2	0.244443	0.114676	0.0497523	457.8	0.656123	0.219729	0.0682351	450.2	0.601477	0.336105	0.116673	450.2	0.373198	0.113609	0.035179	450.2	0.079476	0.0201734	0.00522065
450.4	1.04881	0.499678	0.197102	520.4	0.244106	0.114822	0.0492852	458	0.653995	0.219463	0.0682929	450.4	0.600539	0.336066	0.116295	450.4	0.37262	0.113618	0.0349837	450.4	0.0784877	0.0197062	0.00535889
450.6	1.04766	0.499414	0.196798	520.6	0.243854	0.114672	0.0495047	458.2	0.65172	0.218728	0.0679547	450.6	0.59961	0.336073	0.116106	450.6	0.372068	0.113581	0.0347317	450.6	0.0772838	0.0195588	0.00553461
450.8	1.04678	0.499511	0.197221	520.8	0.243194	0.114267	0.0490799	458.4	0.650046	0.218387	0.0678539	450.8	0.599191	0.336365	0.1164	450.8	0.371187	0.113304	0.0345414	450.8	0.0763386	0.0197969	0.00575335
451	1.04551	0.499319	0.196862	521	0.242866	0.11389	0.0486066	458.6	0.648792	0.21827	0.0682794	451	0.598362	0.336268	0.116189	451	0.370464	0.112812	0.0340327	451	0.0753453	0.0196271	0.00619716
451.2	1.04431	0.498864	0.196249	521.2	0.242233	0.113305	0.0481419	458.8	0.646956	0.21823	0.0680115	451.2	0.597691	0.336293	0.116491	451.2	0.369307	0.112513	0.0336762	451.2	0.0744628	0.019467	0.00639132
451.4	1.04366	0.498828	0.196473	521.4	0.241634	0.11344	0.047591	459	0.645614	0.218451	0.0684507	451.4	0.596887	0.335859	0.116929	451.4	0.367894	0.11191	0.0328018	451.4	0.0733368	0.0195885	0.00618182
451.6	1.04272	0.498425	0.196992	521.6	0.241395	0.113222	0.0474684	459.2	0.644227	0.21817	0.0682973	451.6	0.595543	0.33488	0.116353	451.6	0.367298	0.111954	0.0320282	451.6	0.0718688	0.0189119	0.00611653
451.8	1.04141	0.497673	0.196743	521.8	0.240805	0.11312	0.0478161	459.4	0.643028	0.217875	0.0682073	451.8	0.595188	0.334385	0.116113	451.8	0.366534	0.111569	0.0314136	451.8	0.0703477	0.0175442	0.00576897
452	1.04051	0.497352	0.197013	522	0.240296	0.112518	0.0482574	459.6	0.641417	0.217445	0.0677735	452	0.594124	0.333719	0.115416	452	0.365481	0.110627	0.0308357	452	0.0689724	0.0171302	0.00535932
452.2	1.04014	0.497014	0.197338	522.2	0.239577	0.112337	0.0481289	459.8	0.639983	0.216894	0.0671381	452.2	0.592769	0.332786	0.115053	452.2	0.365257	0.111209	0.0309737	452.2	0.0673443	0.0161434	0.00479137
452.4	1.03887	0.49629	0.196664	522.4	0.238717	0.112503	0.04824	460	0.638342	0.215709	0.0670028	452.4	0.591663	0.332257	0.114847	452.4	0.364577	0.111069	0.0304955	452.4	0.066047	0.0154208	0.00442234
452.6	1.03773	0.495581	0.196577	522.6	0.237857	0.111966	0.0482832	460.2	0.637648	0.215688	0.0671176	452.6	0.591172	0.331284	0.11463	452.6	0.363936	0.110837	0.0302585	452.6	0.0641574	0.0143339	0.00361198
452.8	1.03721	0.495734	0.196785	522.8	0.235796	0.111367	0.0481379	460.4	0.636782	0.215207	0.0670457	452.8	0.590507	0.331233	0.114974	452.8	0.363134	0.110701	0.0301984	452.8	0.0633893	0.014133	0.0038083
453	1.03573	0.495119	0.196359	523	0.235252	0.111096	0.0483444	460.6	0.635733	0.214932	0.0666784	453	0.589954	0.330331	0.114172	453	0.362622	0.110865	0.0301738	453	0.06187	0.013205	0.0035549
453.2	1.03458	0.494999	0.195998	523.2	0.234653	0.110875	0.048481	460.8	0.634436	0.214102	0.0664631	453.2	0.589585	0.330184	0.11382	453.2	0.362834	0.111257	0.0306155	453.2	0.0606882	0.0126138	0.00305011
453.4	1.03326	0.494594	0.196177	523.4	0.233885	0.110704	0.0482177	461	0.633222	0.213138	0.0664621	453.4	0.589326	0.329435	0.113589	453.4	0.362335	0.111328	0.0311473	453.4	0.0595446	0.0124224	0.00241953
453.6	1.03198	0.493948	0.195345	523.6	0.233027	0.109827	0.047832	461.2	0.631925	0.2127	0.0663695	453.6	0.588456	0.328944	0.112982	453.6	0.362609	0.111818	0.0311837	453.6	0.0587566	0.0127539	0.00234419
453.8	1.03081	0.493036	0.194674	523.8	0.232374	0.109325	0.0474232	461.4	0.630619	0.211885	0.0664573	453.8	0.587554	0.328732	0.112962	453.8	0.362668	0.112052	0.0316499	453.8	0.0577339	0.0130143	0.00267261
454	1.02973	0.492811	0.194036	524	0.231899	0.109288	0.0471802	461.6	0.629164	0.211302	0.0668742	454	0.586625	0.328176	0.112857	454	0.362652	0.112726	0.0319611	454	0.0569485	0.0126557	0.00217233
454.2	1.02878	0.492416	0.193579	524.2	0.230836	0.108958	0.0465056	461.8	0.627912	0.210567	0.0667619	454.2	0.586324	0.327974	0.113066	454.2	0.36236	0.11272	0.0317959	454.2	0.0559815	0.0121841	0.00213059
454.4	1.02711	0.491343	0.19301	524.4	0.230877	0.109108	0.0464997	462	0.626085	0.209796	0.0662926	454.4	0.585128	0.327409	0.112581	454.4	0.362081	0.112867	0.0312423	454.4	0.0550361	0.0119412	0.00188593
454.6	1.02582	0.490929	0.193047	524.6	0.229958	0.108315	0.046315	462.2	0.624407	0.208793	0.0656264	454.6	0.584474	0.327717	0.112818	454.6	0.361547	0.112912	0.031295	454.6	0.0545055	0.0114214	0.00160088
454.8	1.02503	0.491037	0.193314	524.8	0.229519	0.107928	0.0462591	462.4	0.623143	0.208687	0.0658633	454.8	0.583749	0.327542	0.112732	454.8	0.36048	0.11214	0.0310373	454.8	0.0536299	0.0115027	0.0019456
455	1.02387	0.490633	0.193051	525	0.229159	0.10722	0.045875	462.6	0.621924	0.208457	0.0656223	455	0.582897	0.327031	0.112394	455	0.360156	0.111497	0.0310713	455	0.0530635	0.0116441	0.00230172
455.2	1.02258	0.49009	0.192746	525.2	0.228858	0.106458	0.0454584	462.8	0.620256	0.208186	0.0651903	455.2	0.581874	0.326248	0.11197	455.2	0.359928	0.111215	0.0308768	455.2	0.0524993	0.0114663	0.00178713
455.4	1.02194	0.489611	0.192543	525.4	0.227977	0.10575	0.0452185	463	0.618789	0.207666	0.0650152	455.4	0.581053	0.325966	0.111979	455.4	0.359296	0.110636	0.0304088	455.4	0.0520203	0.0116364	0.0015645
455.6	1.02082	0.488765	0.192318	525.6	0.227649	0.10481	0.0451689	463.2	0.617415	0.207304	0.0648196	455.6	0.579821	0.325367	0.111111	455.6	0.359095	0.110558	0.0305321	455.6	0.0512382	0.0109283	0.00176786
455.8	1.02022	0.487899	0.192772	525.8	0.227443	0.104167	0.0454638	463.4	0.616018	0.2069	0.0649483	455.8	0.578954	0.325686	0.111227	455.8	0.358156	0.110166	0.0303927	455.8	0.050428	0.0106389	0.00136256
456	1.01955	0.487583	0.193016	526	0.226697	0.102849	0.0453017	463.6	0.614447	0.206588	0.0649543	456	0.577445	0.324558	0.110378	456	0.357683	0.109489	0.0306419	456	0.0496015	0.0104807	0.00095773
456.2	1.01915	0.487101	0.193091	526.2	0.226836	0.102495	0.0461678	463.8	0.613064	0.206314	0.0651734	456.2	0.576643	0.324148	0.110085	456.2	0.356632	0.10881	0.0297907	456.2	0.0485982	0.00942576	0.00036538
456.4	1.01835	0.48674	0.192938	526.4	0.225844	0.101932	0.0463932	464	0.611605	0.205572	0.0654109	456.4	0.576117	0.32381	0.110402	456.4	0.355869	0.1081	0.0297605	456.4	0.0475897	0.00930077	0.00028515
456.6	1.01776	0.486033	0.192902	526.6	0.225044	0.101253	0.0468378	464.2	0.610423	0.205792	0.0656022	456.6	0.576152	0.32379	0.110129	456.6	0.35508	0.108137	0.0302315	456.6	0.0466869	0.0091544	0.00012939
456.8	1.01765	0.486265	0.192504	526.8	0.224722	0.100699	0.0465598	464.4	0.608692	0.205103	0.064971	456.8	0.575641	0.324046	0.109877	456.8	0.354226	0.107728	0.0306262	456.8	0.0465084	0.00924927	0.00080169
457	1.0166	0.485495	0.192053	527	0.225356	0.100604	0.0465783	464.6	0.607278	0.204466	0.0649707	457	0.575259	0.323941	0.110006	457	0.35352	0.107462	0.0303681	457	0.0458748	0.00894594	0.00107008
457.2	1.01639	0.485296	0.191895	527.2	0.225455	0.100312	0.0458696	464.8	0.605175	0.203921	0.0653551	457.2	0.575315	0.324428	0.110449	457.2	0.353296	0.107165	0.0302309	457.2	0.045294	0.00869912	0.00089409
457.4	1.01552	0.484733	0.191651	527.4	0.225079	0.10009	0.0450573	465	0.603512	0.203353	0.0651078	457.4	0.574433	0.324404	0.111234	457.4	0.352646	0.107146	0.0304583	457.4	0.0448277	0.00862141	0.00140243
457.6	1.01501	0.484451	0.190995	527.6	0.224601	0.0994365	0.0448897	465.2	0.602365	0.203043	0.0648021	457.6	0.573783	0.324281	0.111352	457.6	0.352427	0.107088	0.0301133	457.6	0.0443134	0.00848456	0.0016063
457.8	1.01475	0.48356	0.190273	527.8	0.223973	0.099593	0.0439211	465.4	0.601087	0.202852	0.0648878	457.8	0.572812	0.323526	0.110835	457.8	0.352138	0.107251	0.0301476	457.8	0.0437478	0.00792479	0.00190047
458	1.01438	0.483532	0.190189	528	0.223617	0.0997794	0.0436381	465.6	0.60002	0.202909	0.064916	458	0.572088	0.32288	0.110474	458	0.351809	0.107396	0.0302143	458	0.0433469	0.00749206	0.00124193
458.2	1.01372	0.482984	0.189813	528.2	0.223057	0.100194	0.0436116	465.8	0.598935	0.202125	0.0645747	458.2	0.57129	0.322176	0.110939	458.2	0.351914	0.107947	0.0303331	458.2	0.0428833	0.00713181	0.00141415
458.4	1.01258	0.481981	0.189369	528.4	0.223283	0.10084	0.0438772	466	0.597481	0.201861	0.0637933	458.4	0.570304	0.321906	0.111156	458.4	0.352195	0.108347	0.0307777	458.4	0.0428622	0.00787149	0.0013107
458.6	1.01135	0.482152	0.189207	528.6	0.222866	0.101082	0.0439264	466.2	0.596736	0.202115	0.063609	458.6	0.569911	0.321883	0.111053	458.6	0.35153	0.108293	0.0312227	458.6	0.0425782	0.00784029	0.00164914
458.8	1.01023	0.482142	0.189124	528.8	0.222752	0.101009	0.0439104	466.4	0.595345	0.201978	0.0632303	458.8	0.569181	0.321123	0.110677	458.8	0.351031	0.107881	0.0313252	458.8	0.041867	0.00779367	0.00174326
459	1.00878	0.481478	0.188786	529	0.222441	0.100861	0.0434562	466.6	0.59433	0.201704	0.0628047	459	0.56867	0.320643	0.110903	459	0.351245	0.10818	0.0319799	459	0.0412511	0.00783754	0.00161628
459.2	1.00762	0.481103	0.188091	529.2	0.221929	0.100612	0.0429469	466.8	0.593248	0.201464	0.0628471	459.2	0.567813	0.319676	0.110161	459.2	0.35154	0.10901	0.0324571	459.2	0.0403503	0.00755244	0.00098408
459.4	1.00646	0.480289	0.187639	529.4	0.220956	0.100017	0.0428829	467	0.592048	0.200836	0.062665	459.4	0.567397	0.318919	0.110375	459.4	0.351607	0.109063	0.0329366	459.4	0.0398893	0.00775427	0.00099906
459.6	1.00534	0.480225	0.187964	529.6	0.22058	0.099728	0.0427801	467.2	0.590458	0.200299	0.0624397	459.6	0.566143	0.317877	0.110156	459.6	0.351492	0.109105	0.0326888	459.6	0.0391947	0.00713066	0.00079836
459.8	1.00446	0.480365	0.188278	529.8	0.22029	0.0993884	0.0427824	467.4	0.588985	0.199844	0.0623907	459.8	0.565418	0.317814	0.110306	459.8	0.351167	0.109269	0.0327071	459.8	0.03816	0.00690608	0.0003322
460	1.00377	0.480217	0.188132	530	0.219826	0.0990089	0.0431105	467.6	0.587858	0.199342	0.062337	460	0.564774	0.31728	0.110181	460	0.350641	0.108592	0.0325978	460	0.0373871	0.0066117	0.00022928
460.2	1.0032	0.480283	0.188166	530.2	0.219797	0.0987071	0.0431937	467.8	0.586588	0.198853	0.0623439	460.2	0.564379	0.317547	0.11097	460.2	0.350268	0.108023	0.0325563	460.2	0.0361996	0.00619524	-5.586e-05
460.4	1.00223	0.480103	0.188417	530.4	0.218816	0.0980773	0.0426085	468	0.584688	0.19769	0.0620167	460.4	0.564172	0.317745	0.111832	460.4	0.349554	0.107755	0.0328362	460.4	0.0355676	0.00667236	0.00013444
460.6	1.00136	0.479928	0.187961	530.6	0.218527	0.0977172	0.0427089	468.2	0.583609	0.196995	0.0613654	460.6	0.563753	0.318216	0.111758	460.6	0.348731	0.107388	0.0323502	460.6	0.0348781	0.0062416	-6.185e-05
460.8	1.00072	0.480152	0.187921	530.8	0.218134	0.0971991	0.042061	468.4	0.582242	0.196566	0.0607953	460.8	0.56287	0.318756	0.111855	460.8	0.347708	0.106298	0.031857	460.8	0.0349134	0.00601547	0.00029489
461	0.999805	0.479479	0.188059	531	0.218194	0.0970361	0.0418391	468.6	0.580833	0.195551	0.0606962	461	0.562091	0.318774	0.111955	461	0.346913	0.105264	0.0309387	461	0.0341491	0.005523	0.00014976
461.2	0.999704	0.479122	0.188413	531.2	0.217672	0.0967562	0.0415101	468.8	0.57949	0.195068	0.0607924	461.2	0.562003	0.319525	0.112297	461.2	0.346042	0.104659	0.0305736	461.2	0.0335677	0.00530439	0.00025197
461.4	0.999199	0.479037	0.188319	531.4	0.217274	0.0965947	0.0414747	469	0.578382	0.19444	0.0607501	461.4	0.561207	0.320011	0.112595	461.4	0.345206	0.103929	0.0300415	461.4	0.0333216	0.00535758	0.00032686
461.6	0.99909	0.478388	0.188799	531.6	0.216623	0.0959284	0.0413692	469.2	0.577181	0.193952	0.0603593	461.6	0.560889	0.319743	0.112052	461.6	0.344522	0.10322	0.0294057	461.6	0.0326419	0.00532026	5.496e-05
461.8	0.99864	0.477468	0.188239	531.8	0.216101	0.0961473	0.0412918	469.4	0.576041	0.193683	0.0606322	461.8	0.559961	0.319094	0.111352	461.8	0.34391	0.102604	0.029102	461.8	0.0324083	0.00498266	-9.154e-05
462	0.998188	0.477269	0.188463	532	0.216085	0.0966806	0.0421916	469.6	0.574584	0.193103	0.0603694	462	0.559117	0.318744	0.111133	462	0.343206	0.1024	0.0291779	462	0.0320291	0.00488517	-0.00056431
462.2	0.997053	0.476412	0.187569	532.2	0.21582	0.0970316	0.0425231	469.8	0.572998	0.192552	0.0602108	462.2	0.558626	0.318391	0.111256	462.2	0.342505	0.102245	0.0288043	462.2	0.0317618	0.00493599	-0.00045131
462.4	0.996193	0.475399	0.187086	532.4	0.215661	0.097057	0.0428506	470	0.571643	0.192332	0.0596498	462.4	0.558149	0.31819	0.110815	462.4	0.341919	0.101946	0.0287669	462.4	0.0312352	0.00533373	-0.00010409
462.6	0.995165	0.475096	0.186371	532.6	0.215617	0.0971041	0.0429152	470.2	0.570118	0.191701	0.0593238	462.6	0.55746	0.317568	0.110056	462.6	0.340874	0.101402	0.0282909	462.6	0.0308083	0.00489982	-0.00019672
462.8	0.994537	0.474097	0.18627	532.8	0.215118	0.0967872	0.0429206	470.4	0.568925	0.191258	0.0590884	462.8	0.557078	0.316949	0.109643	462.8	0.340424	0.101215	0.0282797	462.8	0.0308397	0.00433748	-0.00063613
463	0.993673	0.472727	0.185401	533	0.215256	0.0969442	0.0432049	470.6	0.567946	0.1913	0.0596055	463	0.556365	0.3157	0.108583	463	0.340438	0.101707	0.0283949	463	0.0303442	0.00401625	-0.00062761
463.2	0.992639	0.472043	0.184545	533.2	0.215143	0.0964148	0.0427768	470.8	0.566308	0.19057	0.0589815	463.2	0.555776	0.314657	0.107851	463.2	0.340955	0.101737	0.028736	463.2	0.030287	0.00392662	-0.00067522
463.4	0.991605	0.471632	0.184623	533.4	0.215453	0.0966936	0.0429271	471	0.564543	0.189408	0.0587546	463.4	0.555248	0.313295	0.108032	463.4	0.340917	0.101662	0.028916	463.4	0.0303225	0.00378453	-0.00088029
463.6	0.990755	0.471261	0.184215	533.6	0.215205	0.0966026	0.0427845	471.2	0.563158	0.189267	0.058299	463.6	0.554338	0.312619	0.10788	463.6	0.340821	0.102114	0.029118	463.6	0.0297973	0.00331249	-0.00078806
463.8	0.989604	0.470466	0.183721	533.8	0.215136	0.096731	0.0430957	471.4	0.562503	0.189245	0.0586727	463.8	0.553803	0.312082	0.107677	463.8	0.340802	0.102551	0.0297101	463.8	0.0291743	0.00309153	-0.00113186
464	0.988572	0.470179	0.183808	534	0.21468	0.0964317	0.0426852	471.6	0.561771	0.188846	0.0589908	464	0.553279	0.311956	0.107635	464	0.340545	0.102787	0.0301361	464	0.0290435	0.00281802	-0.00168255
464.2	0.987641	0.47028	0.183801	534.2	0.214396	0.0957921	0.0421867	471.8	0.561206	0.188789	0.0594641	464.2	0.5522	0.310844	0.107397	464.2	0.340676	0.103081	0.0306904	464.2	0.0280719	0.00235567	-0.00211015
464.4	0.9865	0.469947	0.183941	534.4	0.213711	0.0952348	0.0420507	472	0.559848	0.18839	0.0590112	464.4	0.551752	0.310688	0.107443	464.4	0.339785	0.103331	0.0304104	464.4	0.0281285	0.00242897	-0.00186434
464.6	0.985473	0.470173	0.183664	534.6	0.21291	0.0949515	0.041485	472.2	0.55935	0.188245	0.0589899	464.6	0.550758	0.31032	0.107345	464.6	0.339567	0.103133	0.0303391	464.6	0.0278088	0.00172628	-0.00223603
464.8	0.984758	0.469938	0.183748	534.8	0.211855	0.0946026	0.040931	472.4	0.558717	0.189077	0.0596249	464.8	0.549844	0.310579	0.107113	464.8	0.339387	0.103304	0.0305737	464.8	0.0275577	0.00152486	-0.00168371
465	0.984215	0.469648	0.183826	535	0.211285	0.0944704	0.0402262	472.6	0.557223	0.188368	0.0596882	465	0.549771	0.31047	0.107769	465	0.338786	0.103389	0.0301744	465	0.0262018	0.00106173	-0.00205947
465.2	0.983855	0.469207	0.183826	535.2	0.210345	0.0938173	0.0395759	472.8	0.556419	0.188903	0.0599861	465.2	0.54955	0.311198	0.108275	465.2	0.337866	0.103353	0.0298771	465.2	0.0255618	0.00074784	-0.00213616
465.4	0.982854	0.468729	0.183077	535.4	0.210076	0.0929824	0.0392229	473	0.555215	0.188852	0.0598296	465.4	0.549702	0.311879	0.108696	465.4	0.337571	0.102851	0.0296044	465.4	0.0248061	0.00090078	-0.00254971
465.6	0.982455	0.468201	0.183439	535.6	0.209044	0.0925734	0.0388758	473.2	0.554262	0.189098	0.059841	465.6	0.549523	0.312043	0.108779	465.6	0.337077	0.102875	0.0293723	465.6	0.0237744	0.00051009	-0.00236295
465.8	0.982252	0.468211	0.18319	535.8	0.208739	0.0935549	0.0392832	473.4	0.552907	0.189052	0.0603286	465.8	0.549184	0.312658	0.10878	465.8	0.336327	0.102601	0.0298996	465.8	0.0236424	-0.00022288	-0.00243767
466	0.98177	0.468347	0.183265	536	0.208121	0.0936469	0.0389593	473.6	0.55152	0.188571	0.0599048	466	0.548978	0.313257	0.108792	466	0.33561	0.102433	0.0297515	466	0.0225628	-0.00102806	-0.00246537
466.2	0.981001	0.468363	0.182649	536.2	0.207504	0.0931206	0.0384395	473.8	0.550088	0.18817	0.0594034	466.2	0.548885	0.313728	0.109177	466.2	0.335027	0.101998	0.0295825	466.2	0.0219896	-0.00078296	-0.00241429
466.4	0.98075	0.467897	0.182224	536.4	0.207392	0.0933517	0.0386326	474	0.548817	0.187068	0.0589139	466.4	0.548301	0.313798	0.109278	466.4	0.334462	0.101485	0.0295074	466.4	0.021405	-0.00092921	-0.00190717
466.6	0.97994	0.467698	0.181918	536.6	0.207531	0.0932801	0.0384402	474.2	0.547534	0.186095	0.0583498	466.6	0.547743	0.314163	0.109275	466.6	0.333914	0.101027	0.0289705	466.6	0.0218429	-0.00105198	-0.00197091
466.8	0.978771	0.467199	0.181715	536.8	0.207215	0.0936141	0.0386669	474.4	0.546386	0.185663	0.0577105	466.8	0.547362	0.314356	0.109101	466.8	0.333699	0.10099	0.0290796	466.8	0.022108	-0.00105366	-0.00162926
467	0.977886	0.46681	0.181237	537	0.207395	0.0934952	0.0386085	474.6	0.54528	0.184955	0.0576994	467	0.546448	0.313579	0.108624	467	0.333896	0.101092	0.0291614	467	0.0221737	-0.00059641	-0.00114117
467.2	0.976592	0.466722	0.181218	537.2	0.207459	0.0934962	0.0383609	474.8	0.543673	0.183568	0.0568997	467.2	0.545988	0.313642	0.109403	467.2	0.333652	0.100626	0.0292979	467.2	0.0223569	-0.00032008	-0.00055678
467.4	0.976062	0.466431	0.181713	537.4	0.207484	0.0941271	0.0387893	475	0.542294	0.183009	0.0570265	467.4	0.544987	0.312372	0.109005	467.4	0.333163	0.100782	0.029059	467.4	0.0225567	0.00010448	-0.00016148
467.6	0.975441	0.465987	0.181714	537.6	0.206997	0.0938391	0.0393106	475.2	0.54143	0.182448	0.0568246	467.6	0.544299	0.31173	0.108121	467.6	0.33277	0.100479	0.0294396	467.6	0.022918	0.00075266	0.00038633
467.8	0.974155	0.465561	0.181647	537.8	0.206628	0.0935393	0.0395472	475.4	0.540339	0.181782	0.0572159	467.8	0.543199	0.310577	0.107649	467.8	0.33249	0.100067	0.029082	467.8	0.0227718	0.00064574	-0.00022363
468	0.973397	0.466181	0.182032	538	0.206513	0.0929677	0.0393154	475.6	0.539646	0.181138	0.0576934	468	0.542162	0.310014	0.106829	468	0.33204	0.099801	0.0293683	468	0.0225027	0.00062079	-0.0007527
468.2	0.973102	0.466042	0.182191	538.2	0.206454	0.0921752	0.0396781	475.8	0.538408	0.18059	0.0577526	468.2	0.541318	0.30899	0.10695	468.2	0.331951	0.0993004	0.0292438	468.2	0.0217892	0.00063617	-0.00079977
468.4	0.97242	0.465977	0.182344	538.4	0.206489	0.0924208	0.040441	476	0.536509	0.180173	0.0574016	468.4	0.540918	0.308769	0.107002	468.4	0.331418	0.0992158	0.0286334	468.4	0.0219516	0.00110751	-0.00059667
468.6	0.972076	0.465901	0.182386	538.6	0.206822	0.0928794	0.0409714	476.2	0.53561	0.180366	0.0577627	468.6	0.540163	0.308027	0.106774	468.6	0.330975	0.0994423	0.028435	468.6	0.0210318	0.00054776	-0.00109051
468.8	0.97149	0.465643	0.182451	538.8	0.20695	0.092728	0.0410356	476.4	0.534296	0.180278	0.0576151	468.8	0.539191	0.307702	0.106532	468.8	0.330488	0.0996696	0.027942	468.8	0.0205778	0.00063688	-0.00114083
469	0.971295	0.465716	0.182697	539	0.207687	0.0925324	0.0411926	476.6	0.532621	0.179902	0.0576275	469	0.538963	0.306785	0.106874	469	0.329694	0.0993185	0.026968	469	0.0195336	-8.54e-06	-0.00249523
469.2	0.970586	0.464753	0.181977	539.2	0.207881	0.0921005	0.0416371	476.8	0.532054	0.180277	0.0575835	469.2	0.537917	0.306642	0.106927	469.2	0.329063	0.0987829	0.0266612	469.2	0.0192477	-2.642e-05	-0.002782
469.4	0.970061	0.464915	0.181835	539.4	0.208126	0.092203	0.0421021	477	0.531099	0.180076	0.0573228	469.4	0.538129	0.306519	0.107219	469.4	0.328743	0.0983418	0.0263713	469.4	0.0192241	-0.00014865	-0.00272971
469.6	0.97043	0.464921	0.182448	539.6	0.207657	0.0924836	0.0423285	477.2	0.530089	0.180137	0.0579927	469.6	0.537551	0.306163	0.107091	469.6	0.327826	0.098177	0.0263127	469.6	0.0185874	-0.0013262	-0.00275704
469.8	0.970162	0.464815	0.182086	539.8	0.207464	0.0925838	0.0423235	477.4	0.528985	0.180005	0.0576546	469.8	0.537275	0.305826	0.10697	469.8	0.327022	0.0977995	0.0264042	469.8	0.0180441	-0.00208627	-0.00321482
470	0.969299	0.464241	0.182082	540	0.206735	0.0922808	0.0419989	477.6	0.528457	0.180044	0.0574793	470	0.536972	0.305388	0.10759	470	0.326417	0.0978428	0.0261487	470	0.0174405	-0.00222318	-0.00304649
470.2	0.968433	0.46354	0.181286	540.2	0.205864	0.0914978	0.0416757	477.8	0.527501	0.179845	0.0571381	470.2	0.536676	0.305296	0.107689	470.2	0.326118	0.0977369	0.0263416	470.2	0.0176247	-0.00199918	-0.00284077
470.4	0.967523	0.462404	0.180852	540.4	0.204937	0.0912094	0.0408562	478	0.526618	0.179022	0.0565537	470.4	0.536553	0.305973	0.108006	470.4	0.3255	0.0973139	0.0262053	470.4	0.017865	-0.00244379	-0.00242744
470.6	0.966657	0.462064	0.180877	540.6	0.20469	0.09083	0.0407462	478.2	0.526095	0.179003	0.0566488	470.6	0.536183	0.306282	0.108177	470.6	0.324776	0.0973931	0.025826	470.6	0.0180346	-0.00236015	-0.00199395
470.8	0.966081	0.461321	0.180384	540.8	0.203565	0.0903158	0.039863	478.4	0.525135	0.178313	0.0558239	470.8	0.53565	0.306432	0.108291	470.8	0.32444	0.0975795	0.0263022	470.8	0.0176628	-0.00265952	-0.00164657
471	0.96569	0.460523	0.180378	541	0.202792	0.0894303	0.0389334	478.6	0.524527	0.178462	0.0563076	471	0.53551	0.306383	0.1082	471	0.323859	0.0973157	0.0264202	471	0.0175424	-0.00265209	-0.00173264
471.2	0.964756	0.459282	0.180116	541.2	0.20228	0.089226	0.038149	478.8	0.52353	0.178118	0.0561468	471.2	0.534928	0.305865	0.108394	471.2	0.323821	0.0970419	0.0266116	471.2	0.017455	-0.00296418	-0.00141649
471.4	0.964468	0.458961	0.179987	541.4	0.201845	0.0890948	0.0379343	479	0.522284	0.177911	0.0558985	471.4	0.534321	0.30549	0.107928	471.4	0.323774	0.0968094	0.0268692	471.4	0.0179614	-0.00195798	-0.00046157
471.6	0.963994	0.45856	0.179773	541.6	0.201594	0.0885527	0.0380506	479.2	0.521284	0.177167	0.0555224	471.6	0.534298	0.305654	0.107836	471.6	0.323516	0.0966132	0.0271346	471.6	0.0178471	-0.00161161	-0.00038786
471.8	0.963066	0.45796	0.17943	541.8	0.2012	0.0882227	0.0374389	479.4	0.52052	0.176766	0.0558359	471.8	0.533115	0.30509	0.107218	471.8	0.323891	0.096166	0.0271868	471.8	0.0169297	-0.00195065	-0.00055589
472	0.962913	0.458013	0.179918	542	0.201229	0.0876918	0.037321	479.6	0.519579	0.176052	0.0556883	472	0.532732	0.305083	0.106944	472	0.323833	0.0964556	0.0275154	472	0.0162656	-0.00171132	-0.00069076
472.2	0.962463	0.457616	0.180215	542.2	0.201511	0.0878504	0.0381163	479.8	0.51818	0.175416	0.0556628	472.2	0.532261	0.30494	0.107269	472.2	0.323896	0.0970577	0.0272307	472.2	0.0160237	-0.00136484	-0.00030945
472.4	0.961948	0.457868	0.180238	542.4	0.202152	0.0885056	0.0387659	480	0.516432	0.174936	0.0550667	472.4	0.531554	0.304297	0.106426	472.4	0.324031	0.0978319	0.0272582	472.4	0.0155671	-0.00110681	-0.00046428
472.6	0.961359	0.457793	0.180291	542.6	0.20232	0.0887028	0.038642	480.2	0.515574	0.174594	0.0553833	472.6	0.530912	0.304113	0.106645	472.6	0.324039	0.098486	0.0278099	472.6	0.0146686	-0.00146855	-0.00124646
472.8	0.960804	0.457792	0.180155	542.8	0.20282	0.0890107	0.0390318	480.4	0.513854	0.173715	0.0548373	472.8	0.530122	0.303587	0.106389	472.8	0.323983	0.0987262	0.027545	472.8	0.0145968	-0.00117003	-0.00146721
473	0.960338	0.457757	0.18006	543	0.203093	0.0896916	0.0396609	480.6	0.513054	0.174081	0.0550242	473	0.529367	0.302877	0.106131	473	0.324157	0.0991923	0.0275713	473	0.0142868	-0.00123422	-0.00160954
473.2	0.959564	0.457382	0.179231	543.2	0.203286	0.0901545	0.0401113	480.8	0.51191	0.174015	0.0546029	473.2	0.528514	0.301932	0.105938	473.2	0.324383	0.0995486	0.0279168	473.2	0.0141139	-0.00112671	-0.0012542
473.4	0.959253	0.457587	0.17955	543.4	0.203523	0.0905792	0.0398472	481	0.510953	0.173523	0.0543891	473.4	0.528176	0.301048	0.105823	473.4	0.323964	0.0997312	0.0278893	473.4	0.0140818	-0.00120215	-0.00121773
473.6	0.959136	0.457063	0.179281	543.6	0.203091	0.0911522	0.0399948	481.2	0.510073	0.173422	0.0547039	473.6	0.527029	0.300068	0.105204	473.6	0.323513	0.100297	0.0280044	473.6	0.0130448	-0.00163173	-0.00151281
473.8	0.958461	0.456931	0.179075	543.8	0.202977	0.0916046	0.0399388	481.4	0.509299	0.173809	0.0545503	473.8	0.526146	0.298922	0.104939	473.8	0.32263	0.100242	0.027814	473.8	0.0124073	-0.00197046	-0.00191592
474	0.958151	0.456427	0.179278	544	0.20297	0.0923974	0.0404145	481.6	0.508506	0.173491	0.054575	474	0.525609	0.298673	0.105299	474	0.322112	0.100081	0.0280935	474	0.0126155	-0.0020391	-0.00174385
474.2	0.957323	0.456099	0.178916	544.2	0.202497	0.0921539	0.0402935	481.8	0.507419	0.173132	0.0540961	474.2	0.524909	0.298809	0.10483	474.2	0.321466	0.0996406	0.0284852	474.2	0.0132972	-0.00216495	-0.00159967
474.4	0.956312	0.455992	0.179152	544.4	0.202482	0.0920452	0.0399099	482	0.506637	0.173104	0.0543684	474.4	0.524373	0.299122	0.104536	474.4	0.320252	0.0991232	0.0286906	474.4	0.0130107	-0.00266009	-0.00195687
474.6	0.95588	0.455931	0.179038	544.6	0.202856	0.0920833	0.0403697	482.2	0.505841	0.172872	0.0545463	474.6	0.523372	0.298237	0.104042	474.6	0.319146	0.0985228	0.0291045	474.6	0.0129394	-0.00251372	-0.00203872
474.8	0.955666	0.455451	0.178697	544.8	0.2026	0.0918425	0.0398004	482.4	0.504533	0.172081	0.0537952	474.8	0.522622	0.298052	0.103933	474.8	0.318263	0.0974958	0.0289717	474.8	0.0123545	-0.00340771	-0.00251892
475	0.954919	0.45547	0.178684	545	0.202479	0.0918401	0.0397365	482.6	0.503516	0.172258	0.0542932	475	0.522034	0.298214	0.103752	475	0.318008	0.0967994	0.0290348	475	0.0123537	-0.00298442	-0.00292434
475.2	0.953888	0.454869	0.178129	545.2	0.20285	0.0921829	0.0397379	482.8	0.502343	0.171232	0.0536518	475.2	0.521	0.2978	0.104011	475.2	0.317654	0.096072	0.0289578	475.2	0.0118223	-0.00292927	-0.00314627
475.4	0.9537	0.454798	0.177835	545.4	0.202801	0.0922063	0.0404059	483	0.50105	0.170945	0.0531976	475.4	0.520684	0.298706	0.104049	475.4	0.316976	0.0957363	0.0286195	475.4	0.0116316	-0.00288205	-0.00299691
475.6	0.953092	0.454084	0.177551	545.6	0.202663	0.0917456	0.0406485	483.2	0.500115	0.17001	0.0527881	475.6	0.520367	0.299049	0.104063	475.6	0.316026	0.0947757	0.0279921	475.6	0.0113066	-0.00302747	-0.00353696
475.8	0.952252	0.453643	0.177441	545.8	0.202661	0.0913033	0.0404458	483.4	0.49913	0.169284	0.0527737	475.8	0.519553	0.299013	0.103781	475.8	0.315573	0.0937916	0.0277726	475.8	0.0115899	-0.00271396	-0.00355732
476	0.951642	0.453382	0.177515	546	0.20261	0.0906625	0.0406178	483.6	0.497038	0.16818	0.0521289	476	0.519411	0.29945	0.10393	476	0.315603	0.0943232	0.0277997	476	0.011654	-0.0022328	-0.00379226
476.2	0.9506	0.45338	0.176989	546.2	0.202196	0.0899154	0.0404566	483.8	0.495587	0.167205	0.0516537	476.2	0.519223	0.299908	0.104033	476.2	0.315489	0.0944266	0.0276453	476.2	0.0120282	-0.00241507	-0.0032863
476.4	0.949582	0.452983	0.17614	546.4	0.201491	0.0893122	0.0401516	484	0.49372	0.166787	0.0512272	476.4	0.518818	0.300151	0.103942	476.4	0.315406	0.0943738	0.0275052	476.4	0.0122778	-0.00269268	-0.00352367
476.6	0.949034	0.4525	0.175871	546.6	0.201205	0.089251	0.0401975	484.2	0.493161	0.16636	0.051374	476.6	0.518398	0.30057	0.104384	476.6	0.314742	0.0941919	0.0274233	476.6	0.0121324	-0.00264448	-0.00375171
476.8	0.948913	0.452396	0.175595	546.8	0.201311	0.0895507	0.0406574	484.4	0.492093	0.166028	0.0512652	476.8	0.518024	0.30002	0.104493	476.8	0.314571	0.0941471	0.0270054	476.8	0.0124734	-0.00166656	-0.00323571
477	0.94857	0.452239	0.175615	547	0.200646	0.0893005	0.0400733	484.6	0.491525	0.166104	0.0514919	477	0.517761	0.300124	0.104823	477	0.314207	0.0939531	0.0271403	477	0.012479	-0.00126324	-0.00297465
477.2	0.948449	0.451841	0.175449	547.2	0.200618	0.0890186	0.0400563	484.8	0.49068	0.165703	0.0514482	477.2	0.517599	0.299679	0.104509	477.2	0.313338	0.0934208	0.0267189	477.2	0.0119604	-0.00154003	-0.00267517
477.4	0.948191	0.451247	0.175861	547.4	0.200114	0.0889767	0.0397575	485	0.490173	0.165649	0.0515292	477.4	0.517512	0.299213	0.104483	477.4	0.312552	0.0927189	0.0264522	477.4	0.0118826	-0.00155613	-0.00297694
477.6	0.947619	0.450746	0.175447	547.6	0.199335	0.0892242	0.0400957	485.2	0.489189	0.165422	0.0514846	477.6	0.517015	0.298653	0.104279	477.6	0.312027	0.0923506	0.0261271	477.6	0.01183	-0.00194151	-0.0024176
477.8	0.947153	0.450979	0.175215	547.8	0.198961	0.0890459	0.0394662	485.4	0.488406	0.165543	0.0512085	477.8	0.516942	0.298355	0.104667	477.8	0.311098	0.0916984	0.0260829	477.8	0.0125712	-0.00152119	-0.00207513
478	0.947306	0.450774	0.175086	548	0.198616	0.0893642	0.0394916	485.6	0.487291	0.165001	0.0506555	478	0.516656	0.298184	0.104448	478	0.310831	0.0911297	0.0260966	478	0.0128372	-0.00113606	-0.00179852
478.2	0.946928	0.450982	0.175471	548.2	0.197868	0.0883948	0.0387006	485.8	0.48662	0.165283	0.0506739	478.2	0.515933	0.297934	0.104045	478.2	0.310638	0.091319	0.0263803	478.2	0.0133437	-0.00092118	-0.00167443
478.4	0.946265	0.450788	0.175606	548.4	0.198005	0.0881093	0.0383142	486	0.486415	0.165462	0.0510579	478.4	0.515945	0.297618	0.103821	478.4	0.309926	0.091406	0.0264806	478.4	0.0130067	-0.00099443	-0.00190367
478.6	0.946237	0.450924	0.175352	548.6	0.198175	0.088369	0.0380105	486.2	0.485705	0.164705	0.0509957	478.6	0.515734	0.296663	0.103755	478.6	0.309488	0.0912855	0.0266469	478.6	0.0125667	-0.00063559	-0.00172611
478.8	0.945773	0.451013	0.175648	548.8	0.197922	0.0882558	0.0376887	486.4	0.485129	0.164529	0.0507713	478.8	0.515185	0.296252	0.10352	478.8	0.309419	0.0916973	0.0265332	478.8	0.0118534	-0.00103343	-0.00160246
479	0.945057	0.450711	0.175524	549	0.197948	0.0885416	0.0375151	486.6	0.484368	0.164073	0.0510456	479	0.514374	0.295705	0.103016	479	0.30945	0.0925815	0.026879	479	0.0113825	-0.00068403	-0.0018504
479.2	0.944697	0.450525	0.17544	549.2	0.198305	0.0888526	0.0377057	486.8	0.483116	0.163403	0.050576	479.2	0.513655	0.295233	0.102878	479.2	0.308874	0.0928527	0.026708	479.2	0.0112567	-0.00072461	-0.00187963
479.4	0.944644	0.450199	0.175745	549.4	0.19776	0.0880343	0.0376817	487	0.481716	0.162963	0.0503692	479.4	0.513101	0.294983	0.102407	479.4	0.309216	0.0936559	0.0268838	479.4	0.011023	-0.00151766	-0.00184719
479.6	0.943518	0.450127	0.175682	549.6	0.197773	0.0878917	0.0376699	487.2	0.48088	0.16247	0.0503714	479.6	0.512677	0.294481	0.101702	479.6	0.308769	0.0936405	0.0266529	479.6	0.011166	-0.00182484	-0.00205175
479.8	0.942772	0.449825	0.17557	549.8	0.197833	0.087771	0.037727	487.4	0.479749	0.162218	0.0503405	479.8	0.511958	0.294243	0.101361	479.8	0.308798	0.0943173	0.0268239	479.8	0.0111381	-0.00189271	-0.00185347
480	0.942079	0.449873	0.175609	550	0.19698	0.0872408	0.0376237	487.6	0.477873	0.161565	0.0497252	480	0.511288	0.294241	0.101086	480	0.309423	0.0951283	0.0272063	480	0.0106924	-0.00247082	-0.00220688
480.2	0.940888	0.449377	0.175144	550.2	0.196439	0.0867608	0.0375226	487.8	0.476846	0.161181	0.0497166	480.2	0.510543	0.293636	0.100952	480.2	0.308718	0.0952541	0.0268433	480.2	0.0105959	-0.00327309	-0.0019899
480.4	0.939944	0.449075	0.174628	550.4	0.195633	0.0866279	0.0374775	488	0.476067	0.160757	0.0502151	480.4	0.509558	0.293228	0.100915	480.4	0.308447	0.0950678	0.0263481	480.4	0.0104406	-0.00343493	-0.00228618
480.6	0.940264	0.448747	0.175202	550.6	0.195245	0.0867291	0.0373204	488.2	0.475379	0.160244	0.0503024	480.6	0.508851	0.292345	0.100543	480.6	0.307996	0.0950788	0.0264807	480.6	0.00955702	-0.0033585	-0.00259219
480.8	0.939789	0.449029	0.175129	550.8	0.194736	0.0869197	0.03752	488.4	0.474228	0.159967	0.0511735	480.8	0.508409	0.291946	0.100767	480.8	0.307623	0.0947221	0.0261599	480.8	0.0094663	-0.003428	-0.00239582
481	0.939291	0.448815	0.175094	551	0.193938	0.0868671	0.037668	488.6	0.472971	0.159534	0.0508941	481	0.507874	0.292117	0.100713	481	0.307114	0.093935	0.026229	481	0.00879967	-0.00405531	-0.00259375
481.2	0.938306	0.448017	0.174563	551.2	0.193964	0.0870715	0.0380732	488.8	0.471591	0.159105	0.0512027	481.2	0.507548	0.291853	0.100763	481.2	0.306106	0.0928002	0.0255064	481.2	0.00838447	-0.00481673	-0.00282647
481.4	0.937011	0.447446	0.174199	551.4	0.193868	0.0876644	0.0383258	489	0.470554	0.159245	0.0509334	481.4	0.507236	0.291607	0.101645	481.4	0.306556	0.0925422	0.0257803	481.4	0.00871445	-0.00433894	-0.00298798
481.6	0.936228	0.447493	0.173867	551.6	0.193711	0.0879811	0.0384508	489.2	0.469321	0.15867	0.0505765	481.6	0.506321	0.291103	0.101842	481.6	0.306784	0.0924352	0.0261889	481.6	0.00896202	-0.00394729	-0.00261753
481.8	0.935583	0.447515	0.173352	551.8	0.193659	0.0882616	0.0383894	489.4	0.469	0.159014	0.050293	481.8	0.505675	0.290907	0.102143	481.8	0.306116	0.0924587	0.0263007	481.8	0.00870269	-0.00346427	-0.00316824
482	0.935288	0.447289	0.173472	552	0.193604	0.0886101	0.0390205	489.6	0.467908	0.158737	0.0501036	482	0.50516	0.290384	0.102121	482	0.306215	0.0923501	0.0263245	482	0.00854684	-0.00328106	-0.00317921
482.2	0.935019	0.447008	0.17379	552.2	0.193368	0.0883555	0.0388386	489.8	0.467816	0.159339	0.0504396	482.2	0.504748	0.290353	0.102751	482.2	0.306035	0.0924836	0.0263102	482.2	0.00858417	-0.00303447	-0.00339732
482.4	0.934608	0.446669	0.173579	552.4	0.19403	0.0887603	0.039129	490	0.467251	0.159137	0.0503209	482.4	0.504664	0.290136	0.102873	482.4	0.305184	0.0923047	0.0263876	482.4	0.00866672	-0.00228972	-0.00279005
482.6	0.934335	0.446956	0.173592	552.6	0.193981	0.0888511	0.0392152	490.2	0.46628	0.158868	0.0501568	482.6	0.503964	0.289437	0.102467	482.6	0.30476	0.0918472	0.0263103	482.6	0.00819384	-0.00222732	-0.00274399
482.8	0.933832	0.446824	0.17354	552.8	0.1945	0.08872	0.0395991	490.4	0.466027	0.158814	0.0498147	482.8	0.502967	0.288911	0.102108	482.8	0.304471	0.0921861	0.0267376	482.8	0.00853912	-0.002375	-0.00237171
483	0.93378	0.446499	0.172906	553	0.194991	0.0891638	0.0400149	490.6	0.465111	0.158181	0.0498789	483	0.502072	0.28855	0.101518	483	0.304035	0.0920283	0.0266741	483	0.00846797	-0.00230687	-0.00235678
483.2	0.933718	0.446648	0.173418	553.2	0.195088	0.0889951	0.0404862	490.8	0.463985	0.157976	0.0496104	483.2	0.501584	0.288852	0.101525	483.2	0.303745	0.0923399	0.0264143	483.2	0.00859542	-0.00201398	-0.0021114
483.4	0.933537	0.446418	0.173551	553.4	0.195203	0.0886352	0.040823	491	0.463265	0.15784	0.0492911	483.4	0.500827	0.288873	0.100952	483.4	0.303746	0.0926517	0.0267056	483.4	0.0079264	-0.00243263	-0.00261709
483.6	0.933072	0.44624	0.173549	553.6	0.195414	0.0889413	0.0414486	491.2	0.463308	0.158512	0.0490859	483.6	0.500468	0.288915	0.10059	483.6	0.303069	0.0920455	0.0262451	483.6	0.00762706	-0.00266871	-0.00327165
483.8	0.932841	0.445898	0.173407	553.8	0.195175	0.0881346	0.0410365	491.4	0.462293	0.158344	0.0487361	483.8	0.499594	0.288794	0.100011	483.8	0.302767	0.0921536	0.0260226	483.8	0.00749254	-0.00273509	-0.00350016
484	0.932496	0.445876	0.173412	554	0.194687	0.0875509	0.0407775	491.6	0.461184	0.157893	0.0481649	484	0.498837	0.28817	0.0995639	484	0.302433	0.0921119	0.0258137	484	0.00735595	-0.0033683	-0.00439229
484.2	0.931937	0.445254	0.173191	554.2	0.194681	0.0872633	0.0400305	491.8	0.460798	0.157361	0.0481269	484.2	0.498571	0.287954	0.0992702	484.2	0.301563	0.0922708	0.0252324	484.2	0.00740473	-0.00364633	-0.0041685
484.4	0.93184	0.445142	0.173078	554.4	0.193924	0.0867538	0.0389666	492	0.460469	0.157155	0.0481304	484.4	0.498607	0.288206	0.0990408	484.4	0.301245	0.0919229	0.0249679	484.4	0.00756783	-0.00372283	-0.00404785
484.6	0.931808	0.444673	0.173435	554.6	0.193949	0.0866383	0.038551	492.2	0.459393	0.156709	0.0479013	484.6	0.498377	0.287619	0.0986474	484.6	0.300646	0.0918033	0.0251242	484.6	0.00725799	-0.00392457	-0.00386202
484.8	0.930579	0.444123	0.172523	554.8	0.193571	0.0864426	0.0384123	492.4	0.458371	0.156536	0.0479351	484.8	0.497865	0.287873	0.0986676	484.8	0.300341	0.0910279	0.0251324	484.8	0.00716968	-0.00443348	-0.0038214
485	0.93012	0.443561	0.171958	555	0.193232	0.0868084	0.0384189	492.6	0.4572	0.155766	0.0472549	485	0.497525	0.28788	0.0989133	485	0.300367	0.090317	0.0255313	485	0.0063122	-0.00475981	-0.00400796
485.2	0.929243	0.442968	0.171683	555.2	0.193175	0.0865719	0.0380313	492.8	0.456288	0.154985	0.0474424	485.2	0.496989	0.287698	0.0991482	485.2	0.300122	0.090307	0.0254236	485.2	0.00621154	-0.00473407	-0.00388098
485.4	0.928461	0.442601	0.171628	555.4	0.193049	0.087002	0.0381908	493	0.455685	0.155062	0.0470367	485.4	0.496396	0.287086	0.0990545	485.4	0.30045	0.0909423	0.0264802	485.4	0.00606104	-0.00449275	-0.00380559
485.6	0.927937	0.442282	0.171837	555.6	0.19285	0.0871533	0.0382867	493.2	0.454899	0.154586	0.0471157	485.6	0.495859	0.286102	0.0986598	485.6	0.300854	0.0913497	0.0270429	485.6	0.00577838	-0.00452172	-0.00373977
485.8	0.927238	0.441829	0.171708	555.8	0.192243	0.0867091	0.0381901	493.4	0.454083	0.154307	0.0472482	485.8	0.495436	0.285995	0.0988967	485.8	0.300238	0.0914823	0.0269155	485.8	0.00626148	-0.00453892	-0.00353591
486	0.927341	0.441602	0.172325	556	0.191626	0.0869418	0.0377668	493.6	0.452743	0.153696	0.0470602	486	0.495304	0.285463	0.0986625	486	0.299947	0.0915213	0.0271992	486	0.00707318	-0.00400526	-0.00275874
486.2	0.927386	0.441099	0.172283	556.2	0.191043	0.086838	0.0371274	493.8	0.451662	0.153589	0.0473594	486.2	0.494637	0.28534	0.0986114	486.2	0.299654	0.0913424	0.0275738	486.2	0.00718575	-0.00384579	-0.00277803
486.4	0.927242	0.441165	0.172283	556.4	0.191	0.0862399	0.0369421	494	0.450208	0.152684	0.0469602	486.4	0.494583	0.284713	0.0986692	486.4	0.29911	0.0914604	0.0276112	486.4	0.00775574	-0.00309287	-0.00177752
486.6	0.927031	0.441533	0.172326	556.6	0.190659	0.0862712	0.0366446	494.2	0.448885	0.152001	0.046984	486.6	0.494128	0.284335	0.0989495	486.6	0.298915	0.0912496	0.0281035	486.6	0.00758948	-0.00376782	-0.00190276
486.8	0.926855	0.441565	0.172161	556.8	0.190789	0.086455	0.0369136	494.4	0.447935	0.151376	0.0473539	486.8	0.494049	0.284023	0.0993517	486.8	0.298848	0.0912938	0.0286375	486.8	0.00762838	-0.00399439	-0.00191689
487	0.926585	0.441406	0.171766	557	0.190613	0.0865588	0.037119	494.6	0.446377	0.150585	0.0473693	487	0.493611	0.284112	0.0992171	487	0.299261	0.0918217	0.0289203	487	0.00777722	-0.0037053	-0.00174438
487.2	0.926333	0.441344	0.172327	557.2	0.190656	0.0863087	0.0372047	494.8	0.445263	0.150488	0.0477989	487.2	0.493422	0.284095	0.0996508	487.2	0.298693	0.0916977	0.0287713	487.2	0.00807865	-0.0034094	-0.00157656
487.4	0.92614	0.441283	0.172021	557.4	0.190776	0.0860573	0.0373509	495	0.444219	0.15018	0.0471459	487.4	0.492707	0.283563	0.0992957	487.4	0.298308	0.0916193	0.0293581	487.4	0.00816954	-0.00339318	-0.00175156
487.6	0.925393	0.440696	0.171561	557.6	0.190852	0.0859024	0.0373912	495.2	0.443391	0.14949	0.0467054	487.6	0.492033	0.282891	0.0987837	487.6	0.297588	0.0913916	0.0289258	487.6	0.00816885	-0.00332021	-0.00180941
487.8	0.924796	0.44029	0.17105	557.8	0.190303	0.085228	0.0363707	495.4	0.442768	0.149605	0.0468611	487.8	0.491933	0.282819	0.098357	487.8	0.296811	0.091288	0.0281326	487.8	0.00841125	-0.00360127	-0.00168443
488	0.923948	0.439683	0.170397	558	0.190134	0.0851631	0.0364602	495.6	0.442461	0.149386	0.0469222	488	0.491573	0.283088	0.0983443	488	0.296226	0.0909392	0.0277628	488	0.00818155	-0.00378569	-0.00181316
488.2	0.923161	0.439219	0.169898	558.2	0.19008	0.0852523	0.0363638	495.8	0.442053	0.149087	0.0466292	488.2	0.491493	0.283336	0.0979347	488.2	0.295304	0.0902618	0.0272333	488.2	0.00837004	-0.00358923	-0.00144948
488.4	0.922379	0.43866	0.169208	558.4	0.190316	0.085289	0.0367795	496	0.440856	0.148745	0.0460046	488.4	0.491462	0.283139	0.0976855	488.4	0.294968	0.0899039	0.0268815	488.4	0.00815609	-0.00346023	-0.00105652
488.6	0.921532	0.438475	0.169032	558.6	0.190501	0.0853801	0.0372476	496.2	0.439905	0.148021	0.0456396	488.6	0.491328	0.283556	0.0978261	488.6	0.294689	0.0898673	0.026571	488.6	0.0079492	-0.00345128	-0.00057833
488.8	0.92057	0.437699	0.168021	558.8	0.190433	0.0858112	0.0378385	496.4	0.439158	0.1477	0.0450382	488.8	0.490524	0.284086	0.0977952	488.8	0.294392	0.0892884	0.0257783	488.8	0.0077709	-0.0036738	-0.00028857
489	0.920207	0.437337	0.168262	559	0.190548	0.0864303	0.0382684	496.6	0.438737	0.146923	0.0448153	489	0.489782	0.284015	0.0980454	489	0.294258	0.0891225	0.0254301	489	0.00671529	-0.00409444	-0.00078148
489.2	0.919462	0.436904	0.168351	559.2	0.190466	0.085805	0.0382033	496.8	0.438092	0.146833	0.0447404	489.2	0.4894	0.284359	0.0981541	489.2	0.294192	0.0897004	0.0252484	489.2	0.00630788	-0.00404465	-0.00086133
489.4	0.918393	0.436732	0.168514	559.4	0.190847	0.0862561	0.0390494	497	0.437422	0.147255	0.0448471	489.4	0.489082	0.283955	0.0981333	489.4	0.29382	0.0896687	0.025362	489.4	0.00609573	-0.00411715	-0.00113067
489.6	0.917799	0.43704	0.169061	559.6	0.190661	0.0861549	0.0390747	497.2	0.436535	0.146361	0.0445367	489.6	0.488465	0.283623	0.0981183	489.6	0.293601	0.0900415	0.0249223	489.6	0.006192	-0.00401189	-0.00086898
489.8	0.917794	0.437464	0.169533	559.8	0.190498	0.085511	0.0388134	497.4	0.435853	0.146382	0.0445377	489.8	0.488364	0.284172	0.0984203	489.8	0.292395	0.0899457	0.0245954	489.8	0.00676358	-0.00381346	-0.00103861
490	0.917169	0.437087	0.169597	560	0.189999	0.0857058	0.0384016	497.6	0.435094	0.146415	0.0442809	490	0.487944	0.283672	0.098188	490	0.291276	0.0896686	0.0241698	490	0.00652129	-0.00362299	-0.00104884
490.2	0.917066	0.437548	0.170154	560.2	0.190082	0.0849533	0.0379744	497.8	0.434192	0.146537	0.0447647	490.2	0.487442	0.283403	0.0980253	490.2	0.291286	0.0891602	0.0242296	490.2	0.00628007	-0.00385639	-0.00131127
490.4	0.917274	0.438209	0.171064	560.4	0.189665	0.084699	0.037459	498	0.433067	0.146212	0.0446008	490.4	0.487342	0.283154	0.0984088	490.4	0.290438	0.0887753	0.0236402	490.4	0.00658963	-0.00380384	-0.00157975
490.6	0.917139	0.438313	0.171264	560.6	0.189375	0.0846292	0.0369136	498.2	0.432054	0.146122	0.0450795	490.6	0.486652	0.283223	0.0983814	490.6	0.290036	0.0881291	0.0237799	490.6	0.00641524	-0.00451389	-0.00242488
490.8	0.916947	0.438263	0.171674	560.8	0.189241	0.0843839	0.0365736	498.4	0.431231	0.146131	0.0451617	490.8	0.485902	0.282778	0.0982626	490.8	0.289918	0.0879876	0.0240746	490.8	0.00662889	-0.00459904	-0.00272611
491	0.916335	0.438147	0.171213	561	0.189206	0.0840432	0.0359852	498.6	0.430675	0.146174	0.0452951	491	0.485317	0.282819	0.0985996	491	0.289346	0.0882771	0.0245096	491	0.00678782	-0.0046457	-0.00292215
491.2	0.91638	0.438417	0.171623	561.2	0.188855	0.0841491	0.035042	498.8	0.43008	0.145955	0.04524	491.2	0.485068	0.28262	0.0992232	491.2	0.288464	0.087851	0.0248156	491.2	0.00664458	-0.00464717	-0.00303104
491.4	0.91589	0.438106	0.171618	561.4	0.188578	0.0840515	0.0349887	499	0.429598	0.145626	0.0447299	491.4	0.484411	0.281958	0.0990697	491.4	0.287892	0.0878123	0.0251607	491.4	0.00696889	-0.00458064	-0.00335927
491.6	0.915379	0.437891	0.171196	561.6	0.188059	0.0842819	0.0348755	499.2	0.429386	0.145471	0.0448225	491.6	0.483658	0.281603	0.099227	491.6	0.287403	0.0876257	0.0252029	491.6	0.00685351	-0.00450123	-0.00373454
491.8	0.914871	0.437231	0.170679	561.8	0.187133	0.083898	0.0345619	499.4	0.429551	0.145835	0.0450272	491.8	0.48361	0.281802	0.0992654	491.8	0.286719	0.0870398	0.0250668	491.8	0.00658606	-0.00492595	-0.00397649
492	0.91418	0.436581	0.169953	562	0.187236	0.0840744	0.0350797	499.6	0.429122	0.145351	0.0451071	492	0.482542	0.281059	0.0986998	492	0.286707	0.0866506	0.0255534	492	0.00615305	-0.00510018	-0.00416501
492.2	0.913409	0.436005	0.169383	562.2	0.187247	0.0839026	0.0353643	499.8	0.428286	0.144531	0.0442774	492.2	0.482076	0.28013	0.0983729	492.2	0.286472	0.0863231	0.0253997	492.2	0.00620404	-0.00486249	-0.00430055
492.4	0.912944	0.435397	0.168794	562.4	0.187444	0.0838157	0.0356224	500	0.427225	0.143508	0.0434122	492.4	0.481803	0.279916	0.0984099	492.4	0.287247	0.086896	0.0259665	492.4	0.00612494	-0.00456794	-0.00344598
492.6	0.912285	0.435019	0.168742	562.6	0.1872	0.0842115	0.0363713	500.2	0.42696	0.143115	0.0434885	492.6	0.481112	0.279866	0.0980009	492.6	0.28746	0.0871469	0.0256004	492.6	0.00587666	-0.00494025	-0.00319537
492.8	0.911655	0.434212	0.168008	562.8	0.187353	0.0844931	0.0367016	500.4	0.426409	0.142666	0.0430928	492.8	0.480501	0.279623	0.0980338	492.8	0.287783	0.0874302	0.0257156	492.8	0.0050558	-0.0052407	-0.00333402
493	0.911242	0.433532	0.16817	563	0.18684	0.0841607	0.0365327	500.6	0.425553	0.142282	0.0429211	493	0.48003	0.279342	0.097606	493	0.288094	0.0878755	0.0257804	493	0.00392369	-0.0058039	-0.00419122
493.2	0.911033	0.433419	0.168019	563.2	0.186684	0.0836474	0.0371637	500.8	0.424674	0.142254	0.0431541	493.2	0.480284	0.279125	0.0977163	493.2	0.288184	0.0882312	0.0259285	493.2	0.00356428	-0.00583477	-0.00394638
493.4	0.910438	0.433303	0.168122	563.4	0.186336	0.0833654	0.0373002	501	0.424319	0.14203	0.0433374	493.4	0.479933	0.278507	0.0973966	493.4	0.287577	0.0881598	0.0255759	493.4	0.00367926	-0.00538242	-0.00350302
493.6	0.910033	0.433475	0.168083	563.6	0.185813	0.0826922	0.03702	501.2	0.423325	0.141005	0.0427788	493.6	0.480349	0.278643	0.0973341	493.6	0.286757	0.0881145	0.0248251	493.6	0.00387169	-0.00526735	-0.00333927
493.8	0.909866	0.433148	0.167914	563.8	0.186015	0.0822713	0.0371377	501.4	0.42252	0.141366	0.0428667	493.8	0.480254	0.278779	0.0965294	493.8	0.286014	0.0872638	0.024257	493.8	0.0032797	-0.00554479	-0.0032812
494	0.908957	0.432765	0.167762	564	0.1854	0.0816316	0.0366707	501.6	0.420951	0.140726	0.0425157	494	0.479567	0.278099	0.0958521	494	0.285907	0.0865199	0.0235347	494	0.00297522	-0.00554715	-0.00345779
494.2	0.909277	0.432891	0.16858	564.2	0.185568	0.0811549	0.0362308	501.8	0.419808	0.140376	0.0427555	494.2	0.479497	0.278607	0.0955963	494.2	0.286337	0.0856592	0.0236118	494.2	0.00329781	-0.00536091	-0.00321871
494.4	0.908956	0.432469	0.1683	564.4	0.184874	0.0807159	0.0352423	502	0.418396	0.13977	0.0426314	494.4	0.479207	0.279038	0.0956783	494.4	0.285738	0.0854038	0.0228555	494.4	0.00337953	-0.00589188	-0.00367477
494.6	0.9083	0.432497	0.168362	564.6	0.185584	0.0811086	0.0352857	502.2	0.41762	0.140062	0.043185	494.6	0.478831	0.278785	0.0956338	494.6	0.285858	0.0856112	0.0229477	494.6	0.00379745	-0.00578782	-0.00354829
494.8	0.907904	0.432419	0.168406	564.8	0.18569	0.0817525	0.0351376	502.4	0.416596	0.140549	0.0433138	494.8	0.478431	0.278789	0.0960127	494.8	0.285368	0.0857742	0.0232811	494.8	0.00404983	-0.00602868	-0.00340775
495	0.907216	0.431939	0.168113	565	0.186205	0.0825777	0.0356554	502.6	0.415521	0.14043	0.0433995	495	0.478153	0.278475	0.096311	495	0.28446	0.0856482	0.0233699	495	0.00376186	-0.00631295	-0.00349388
495.2	0.907233	0.431966	0.168366	565.2	0.186111	0.0832846	0.035808	502.8	0.414744	0.140332	0.0432905	495.2	0.477682	0.278179	0.0965986	495.2	0.284299	0.0856231	0.0236046	495.2	0.00406329	-0.00604133	-0.00335036
495.4	0.906695	0.431332	0.16831	565.4	0.185886	0.0836643	0.036509	503	0.414219	0.140458	0.0435783	495.4	0.476992	0.277551	0.0964467	495.4	0.283992	0.085564	0.0236384	495.4	0.00441706	-0.00606494	-0.0033787
495.6	0.906082	0.431137	0.167891	565.6	0.185503	0.0841448	0.0368752	503.2	0.41383	0.140535	0.0440646	495.6	0.476061	0.277059	0.0965718	495.6	0.283734	0.0856428	0.0241806	495.6	0.00424833	-0.00599201	-0.00335346
495.8	0.905731	0.430464	0.167222	565.8	0.185611	0.0842429	0.0371546	503.4	0.413887	0.140496	0.0446175	495.8	0.475664	0.276929	0.096371	495.8	0.28313	0.0855582	0.0238502	495.8	0.00400851	-0.00622439	-0.00343724
496	0.905015	0.430039	0.166512	566	0.185596	0.0843263	0.0372801	503.6	0.413325	0.140907	0.0449262	496	0.474308	0.275771	0.0959359	496	0.283425	0.0858482	0.024414	496	0.00425036	-0.00611229	-0.00319932
496.2	0.904199	0.429938	0.166119	566.2	0.184761	0.0841025	0.0369464	503.8	0.412642	0.140568	0.0447257	496.2	0.473212	0.275026	0.0957094	496.2	0.283344	0.0862445	0.0243941	496.2	0.00480133	-0.00558806	-0.00260916
496.4	0.903965	0.429928	0.165897	566.4	0.185028	0.0850309	0.0377716	504	0.412027	0.140636	0.0443762	496.4	0.472198	0.27476	0.0953463	496.4	0.283334	0.0871955	0.025041	496.4	0.00476856	-0.0055563	-0.00226156
496.6	0.903531	0.43005	0.166014	566.6	0.185007	0.0856892	0.0385094	504.2	0.411455	0.140549	0.044267	496.6	0.471437	0.274358	0.0952452	496.6	0.282748	0.0870588	0.0244728	496.6	0.00501606	-0.00563043	-0.00233287
496.8	0.903319	0.429971	0.166153	566.8	0.185258	0.0855697	0.0379384	504.4	0.410684	0.140472	0.0442699	496.8	0.471321	0.274356	0.0952669	496.8	0.282002	0.0868942	0.0246044	496.8	0.00458027	-0.00522889	-0.00189684
497	0.903176	0.429671	0.165931	567	0.185145	0.0853666	0.0380768	504.6	0.409757	0.140136	0.0442608	497	0.471709	0.274567	0.0948564	497	0.281609	0.0866058	0.0239044	497	0.00456001	-0.00520848	-0.00240473
497.2	0.903312	0.430358	0.166549	567.2	0.1844	0.0849202	0.0379998	504.8	0.409099	0.139675	0.0442673	497.2	0.471701	0.274597	0.0952911	497.2	0.281004	0.086246	0.0240091	497.2	0.00467917	-0.00484255	-0.00202534
497.4	0.902609	0.430121	0.166495	567.4	0.184223	0.0841034	0.0373344	505	0.408827	0.139457	0.0443751	497.4	0.471517	0.274103	0.0952751	497.4	0.280404	0.0861899	0.0237406	497.4	0.00439803	-0.0046999	-0.0022558
497.6	0.901579	0.430325	0.165947	567.6	0.184374	0.0840071	0.0375274	505.2	0.407632	0.138436	0.0433474	497.6	0.471733	0.274507	0.0951959	497.6	0.280049	0.0858643	0.0237773	497.6	0.00385727	-0.0048088	-0.00275867
497.8	0.900888	0.429651	0.165774	567.8	0.184652	0.0835498	0.0375644	505.4	0.40687	0.137732	0.0427122	497.8	0.4712	0.274355	0.0952779	497.8	0.279449	0.0851777	0.0236337	497.8	0.0036141	-0.00469378	-0.00266247
498	0.899956	0.429544	0.165639	568	0.18417	0.0828134	0.0372758	505.6	0.406239	0.137089	0.0421929	498	0.471646	0.27509	0.0960895	498	0.27937	0.0850124	0.0235081	498	0.0034503	-0.00472991	-0.0032985
498.2	0.899608	0.429639	0.165743	568.2	0.184302	0.0822241	0.0370908	505.8	0.405958	0.136855	0.041964	498.2	0.471756	0.275374	0.0958199	498.2	0.278957	0.0844974	0.0232942	498.2	0.00325712	-0.00519189	-0.00328216
498.4	0.898574	0.429012	0.165055	568.4	0.184072	0.0818592	0.0366603	506	0.405483	0.137014	0.0419975	498.4	0.471832	0.275454	0.0959814	498.4	0.278783	0.0847385	0.0233757	498.4	0.00319255	-0.00542939	-0.00391639
498.6	0.897734	0.428953	0.165207	568.6	0.184817	0.0824032	0.0373404	506.2	0.405013	0.137349	0.0421377	498.6	0.471763	0.275243	0.0957792	498.6	0.27821	0.0843737	0.0233202	498.6	0.00368037	-0.00531297	-0.00374764
498.8	0.897373	0.428295	0.16496	568.8	0.184572	0.0819191	0.0368967	506.4	0.403623	0.137241	0.0417305	498.8	0.471366	0.275296	0.0953202	498.8	0.277308	0.0839177	0.0234694	498.8	0.00341412	-0.00560535	-0.00389006
499	0.89701	0.427724	0.165058	569	0.184886	0.0816953	0.0368049	506.6	0.403406	0.136788	0.0416401	499	0.470854	0.274933	0.0951397	499	0.276764	0.0836838	0.0236618	499	0.00327279	-0.00587912	-0.00394629
499.2	0.896688	0.427647	0.164859	569.2	0.184573	0.0818375	0.0364888	506.8	0.40292	0.136278	0.0413645	499.2	0.470489	0.274894	0.0953224	499.2	0.27669	0.0836084	0.0239676	499.2	0.0038952	-0.00571827	-0.0040328
499.4	0.896268	0.427288	0.164994	569.4	0.184359	0.0818042	0.0365996	507	0.401989	0.135678	0.0409524	499.4	0.470258	0.274926	0.0951446	499.4	0.276782	0.0836444	0.0244217	499.4	0.00411113	-0.00606201	-0.00399884
499.6	0.895892	0.427291	0.165068	569.6	0.184238	0.0817255	0.0370596	507.2	0.401693	0.135626	0.0416154	499.6	0.469358	0.274104	0.0949533	499.6	0.276658	0.0836118	0.0245522	499.6	0.00432521	-0.0063454	-0.00410294
499.8	0.895798	0.427068	0.164993	569.8	0.184161	0.0813482	0.0366234	507.4	0.400828	0.135239	0.041343	499.8	0.468824	0.273932	0.0948225	499.8	0.27636	0.0838855	0.0246832	499.8	0.00404267	-0.00651208	-0.0041986
500	0.895659	0.426583	0.164885	570	0.183657	0.0814162	0.03679	507.6	0.399534	0.134857	0.0408943	500	0.467604	0.27291	0.0942997	500	0.275883	0.0839271	0.025085	500	0.00473933	-0.00633838	-0.00306517
500.2	0.895437	0.426567	0.164911	570.2	0.183116	0.0812415	0.0363849	507.8	0.398516	0.134158	0.0402207	500.2	0.467284	0.272567	0.0939914	500.2	0.275135	0.0833593	0.0251534	500.2	0.00503464	-0.00600278	-0.00250587
500.4	0.895485	0.426166	0.164743	570.4	0.18366	0.0815936	0.0367144	508	0.397625	0.133495	0.0397863	500.4	0.467023	0.272512	0.0938241	500.4	0.275008	0.0831332	0.0252384	500.4	0.00562472	-0.00563828	-0.00206807
500.6	0.895465	0.425744	0.165028	570.6	0.183319	0.08123	0.0363591	508.2	0.396363	0.132583	0.0398044	500.6	0.466606	0.272235	0.0937301	500.6	0.274379	0.082175	0.0249103	500.6	0.00607111	-0.00520494	-0.00129442
500.8	0.895474	0.425557	0.16486	570.8	0.183002	0.0806559	0.0361603	508.4	0.394903	0.132181	0.0401964	500.8	0.466888	0.272579	0.0937398	500.8	0.274528	0.0825429	0.0249524	500.8	0.00531265	-0.00574498	-0.001427
501	0.895968	0.425972	0.165045	571	0.182618	0.080653	0.0366816	508.6	0.39399	0.131353	0.0405533	501	0.466507	0.272603	0.0938059	501	0.274858	0.0830025	0.0249327	501	0.00547086	-0.00600769	-0.00190993
501.2	0.896259	0.426491	0.165444	571.2	0.181507	0.0799328	0.0362347	508.8	0.393268	0.131183	0.040814	501.2	0.465835	0.272118	0.0942983	501.2	0.274526	0.0830539	0.0250808	501.2	0.00488553	-0.00650066	-0.00173235
501.4	0.895842	0.426222	0.165385	571.4	0.181569	0.079708	0.036572	509	0.392799	0.131034	0.0410502	501.4	0.465439	0.271614	0.0945611	501.4	0.274376	0.0827853	0.024969	501.4	0.00441746	-0.0064204	-0.00204553
501.6	0.895261	0.4262	0.16484	571.6	0.180998	0.0797645	0.0364969	509.2	0.392085	0.130532	0.040696	501.6	0.465545	0.272182	0.094932	501.6	0.274029	0.0824156	0.0248509	501.6	0.00458634	-0.0061553	-0.0018773
501.8	0.895331	0.426053	0.165047	571.8	0.179917	0.0791521	0.0365251	509.4	0.391424	0.130102	0.0410638	501.8	0.464977	0.271708	0.0948897	501.8	0.273872	0.0828059	0.0243562	501.8	0.00490681	-0.00634629	-0.00195167
502	0.89496	0.426169	0.165158	572	0.178563	0.0789959	0.0363067	509.6	0.390906	0.130376	0.0409098	502	0.464514	0.271552	0.0946534	502	0.274072	0.0829152	0.0241244	502	0.0041485	-0.00658105	-0.00229575
502.2	0.894724	0.426361	0.165079	572.2	0.178487	0.0791068	0.0363579	509.8	0.39028	0.130236	0.0406991	502.2	0.463746	0.271052	0.0941104	502.2	0.274261	0.0828951	0.0237196	502.2	0.00427775	-0.00662998	-0.00229781
502.4	0.893878	0.42594	0.164768	572.4	0.177766	0.0787158	0.0358203	510	0.38979	0.130483	0.0410946	502.4	0.463891	0.27109	0.0944892	502.4	0.274259	0.0829392	0.023896	502.4	0.00442821	-0.00661595	-0.00228321
502.6	0.893485	0.426082	0.164873	572.6	0.177838	0.078688	0.0358358	510.2	0.389005	0.130365	0.0408631	502.6	0.463501	0.270925	0.094425	502.6	0.273534	0.0823594	0.0234107	502.6	0.00460881	-0.00703074	-0.00251762
502.8	0.893293	0.426232	0.164872	572.8	0.177247	0.0784789	0.0349055	510.4	0.388247	0.1307	0.0412269	502.8	0.46302	0.270651	0.0946447	502.8	0.272976	0.0826317	0.0239545	502.8	0.00480559	-0.00663198	-0.0028075
503	0.892095	0.425289	0.164482	573	0.176852	0.078717	0.0347845	510.6	0.387953	0.130501	0.0409922	503	0.462496	0.270696	0.0951631	503	0.272844	0.0827919	0.0239291	503	0.00551632	-0.00637506	-0.0027264
503.2	0.891607	0.425494	0.164428	573.2	0.176995	0.0795535	0.0348893	510.8	0.386702	0.129799	0.0400683	503.2	0.462079	0.270187	0.0952041	503.2	0.272787	0.0825069	0.0239417	503.2	0.0054164	-0.00626857	-0.00342208
503.4	0.890898	0.424829	0.164527	573.4	0.176695	0.079494	0.0344275	511	0.385717	0.129948	0.0394309	503.4	0.462038	0.269912	0.0951346	503.4	0.272649	0.0823209	0.0237259	503.4	0.00497572	-0.00666318	-0.00376365
503.6	0.89023	0.42437	0.164454	573.6	0.176818	0.0794482	0.0345431	511.2	0.385553	0.130172	0.0400737	503.6	0.46186	0.269579	0.0953591	503.6	0.272261	0.08243	0.023782	503.6	0.00457149	-0.00641407	-0.00378612
503.8	0.89003	0.424275	0.164365	573.8	0.176728	0.0793471	0.0341405	511.4	0.384621	0.129973	0.0387378	503.8	0.461655	0.269732	0.0950591	503.8	0.271443	0.0820979	0.0240208	503.8	0.00411242	-0.00643965	-0.0036607
504	0.889884	0.423801	0.164214	574	0.177146	0.0794198	0.0343429	511.6	0.383749	0.129922	0.0386853	504	0.46126	0.269298	0.094805	504	0.270612	0.0818809	0.023418	504	0.00462306	-0.00626179	-0.00308285
504.2	0.88919	0.42355	0.16368	574.2	0.177506	0.0788813	0.0333346	511.8	0.383417	0.129835	0.0388238	504.2	0.460958	0.26894	0.0943019	504.2	0.269925	0.0814711	0.0232507	504.2	0.00434081	-0.00614477	-0.00352706
504.4	0.888877	0.423332	0.163548	574.4	0.177739	0.0782206	0.0330897	512	0.38299	0.129842	0.0394028	504.4	0.460586	0.269261	0.0944601	504.4	0.269343	0.0810143	0.0226774	504.4	0.00400153	-0.00630657	-0.00404913
504.6	0.888514	0.423246	0.163271	574.6	0.17796	0.0776444	0.0329674	512.2	0.382178	0.130118	0.0397786	504.6	0.459853	0.269052	0.0945557	504.6	0.269083	0.0809862	0.0225541	504.6	0.00325163	-0.00699341	-0.00465625
504.8	0.888026	0.423468	0.163298	574.8	0.178003	0.0770256	0.0330661	512.4	0.381364	0.130676	0.0403252	504.8	0.459508	0.269289	0.0943449	504.8	0.268897	0.0811967	0.0228598	504.8	0.00302356	-0.00784808	-0.00493764
505	0.887893	0.42353	0.163662	575	0.17773	0.0765798	0.0330835	512.6	0.381147	0.130248	0.0405812	505	0.459047	0.268858	0.0940436	505	0.268148	0.0805272	0.0224857	505	0.00321949	-0.00775835	-0.0049351
505.2	0.887674	0.42348	0.163454	575.2	0.178176	0.0764565	0.0335115	512.8	0.380549	0.130406	0.0405723	505.2	0.458795	0.268623	0.0945088	505.2	0.267399	0.0796648	0.0220705	505.2	0.00327699	-0.00758779	-0.00469393
505.4	0.887264	0.423505	0.16347	575.4	0.178338	0.07638	0.0335565	513	0.380103	0.130167	0.0406298	505.4	0.458071	0.26831	0.094406	505.4	0.267153	0.0793562	0.0212972	505.4	0.00336496	-0.00694541	-0.0046392
505.6	0.886832	0.422881	0.16273	575.6	0.178232	0.0768884	0.033623	513.2	0.379994	0.130323	0.0416402	505.6	0.457632	0.267959	0.0945811	505.6	0.266538	0.0794721	0.0212729	505.6	0.00373766	-0.0071995	-0.00455307
505.8	0.88656	0.422701	0.162584	575.8	0.178249	0.0773671	0.0340912	513.4	0.379368	0.129845	0.0417923	505.8	0.456665	0.267042	0.0939979	505.8	0.266425	0.0798808	0.021126	505.8	0.00398088	-0.00686386	-0.00430269
506	0.885897	0.422371	0.162361	576	0.178355	0.0780055	0.0340856	513.6	0.37946	0.12967	0.0418153	506	0.456072	0.266898	0.0941519	506	0.266299	0.079609	0.021273	506	0.00387742	-0.00652388	-0.00404123
506.2	0.885361	0.422439	0.161843	576.2	0.178808	0.0786228	0.0346628	513.8	0.379327	0.129414	0.0419442	506.2	0.455352	0.266432	0.0941722	506.2	0.26614	0.0795236	0.0208189	506.2	0.00419872	-0.0063422	-0.00377098
506.4	0.884599	0.421884	0.16173	576.4	0.178248	0.0787262	0.0346388	514	0.379067	0.129136	0.042084	506.4	0.454988	0.265954	0.0939816	506.4	0.266193	0.0798091	0.0213388	506.4	0.00451804	-0.00579039	-0.00355218
506.6	0.884323	0.421419	0.161269	576.6	0.177925	0.0792694	0.0347271	514.2	0.378255	0.128918	0.0416451	506.6	0.454194	0.265826	0.0939829	506.6	0.266129	0.0797151	0.0219686	506.6	0.00529212	-0.00470216	-0.00317715
506.8	0.883652	0.420579	0.160872	576.8	0.177097	0.0793161	0.034495	514.4	0.377424	0.128334	0.0416	506.8	0.454069	0.265571	0.0942483	506.8	0.266009	0.079898	0.0223391	506.8	0.0056097	-0.00404395	-0.00258545
507	0.882897	0.419965	0.160933	577	0.177025	0.0795927	0.0348607	514.6	0.376435	0.127231	0.0407533	507	0.453726	0.265666	0.0944853	507	0.266215	0.0803883	0.0226359	507	0.00560621	-0.00352586	-0.00225545
507.2	0.882776	0.420371	0.161158	577.2	0.177378	0.0803302	0.0347333	514.8	0.375827	0.127013	0.040417	507.2	0.453875	0.265172	0.0942475	507.2	0.266159	0.0804891	0.02276	507.2	0.00485826	-0.00373221	-0.00286836
507.4	0.882574	0.419736	0.161044	577.4	0.177064	0.0800003	0.0345061	515	0.374933	0.126704	0.0400701	507.4	0.453951	0.265638	0.094291	507.4	0.266046	0.0807318	0.0232267	507.4	0.00460584	-0.00382523	-0.00245267
507.6	0.88277	0.420468	0.16154	577.6	0.177235	0.0796533	0.0350123	515.2	0.374226	0.125934	0.0396606	507.6	0.454176	0.265939	0.0941559	507.6	0.266303	0.0813202	0.023807	507.6	0.00478451	-0.00329779	-0.00152856
507.8	0.882572	0.420516	0.161772	577.8	0.176941	0.0795668	0.0349244	515.4	0.372944	0.125456	0.0382252	507.8	0.453473	0.265492	0.09368	507.8	0.266236	0.0809454	0.0241474	507.8	0.00463591	-0.00362475	-0.00135119
508	0.882072	0.42037	0.162201	578	0.177286	0.0794494	0.0349473	515.6	0.371422	0.124793	0.0380512	508	0.453463	0.265436	0.0936729	508	0.265842	0.0810492	0.0238968	508	0.00441434	-0.00394775	-0.0014762
508.2	0.882124	0.420553	0.162686	578.2	0.176847	0.0785668	0.0343178	515.8	0.370979	0.124338	0.0380866	508.2	0.453018	0.265616	0.0934378	508.2	0.265419	0.0807075	0.023797	508.2	0.00383214	-0.00432821	-0.00149243
508.4	0.881572	0.420764	0.16283	578.4	0.176682	0.0776379	0.03411	516	0.370147	0.124025	0.0378688	508.4	0.452557	0.266262	0.093643	508.4	0.265591	0.080763	0.0242461	508.4	0.00341491	-0.00508249	-0.0018311
508.6	0.880799	0.420281	0.163086	578.6	0.176181	0.0770617	0.0338544	516.2	0.369245	0.124078	0.0376822	508.6	0.451821	0.265767	0.0932547	508.6	0.265496	0.0812226	0.0247076	508.6	0.00344549	-0.00535375	-0.00170087
508.8	0.880653	0.420386	0.164234	578.8	0.175723	0.0767468	0.0337204	516.4	0.368529	0.123666	0.0378061	508.8	0.451584	0.265881	0.0927453	508.8	0.26509	0.0807767	0.0249737	508.8	0.00381937	-0.00551944	-0.00137773
509	0.880587	0.420386	0.164577	579	0.175255	0.0769227	0.0339026	516.6	0.367841	0.123055	0.0371535	509	0.451398	0.265978	0.0928346	509	0.26512	0.08092	0.0250644	509	0.0039029	-0.00558489	-0.001445
509.2	0.880582	0.42028	0.164443	579.2	0.176243	0.0775499	0.034435	516.8	0.367278	0.123262	0.0373436	509.2	0.450512	0.265526	0.0930131	509.2	0.264557	0.080939	0.0248976	509.2	0.00394712	-0.005908	-0.00144086
509.4	0.879743	0.419166	0.163736	579.4	0.1765	0.077268	0.0342841	517	0.366766	0.123435	0.0377306	509.4	0.450358	0.265607	0.093034	509.4	0.263982	0.0810614	0.0243957	509.4	0.00364186	-0.00636922	-0.00171807
509.6	0.879162	0.418335	0.163114	579.6	0.17666	0.0778833	0.0345072	517.2	0.366272	0.123318	0.0379972	509.6	0.449887	0.265296	0.0931209	509.6	0.263667	0.0808974	0.0246091	509.6	0.00361596	-0.00655342	-0.00204125
509.8	0.878762	0.418019	0.162926	579.8	0.177189	0.0784321	0.03482	517.4	0.365748	0.123181	0.0377994	509.8	0.449347	0.264756	0.0925609	509.8	0.263169	0.0805896	0.0235674	509.8	0.00414721	-0.00599361	-0.00136949
510	0.878113	0.417293	0.162497	580	0.177238	0.0789492	0.0350655	517.6	0.365233	0.123474	0.0375008	510	0.448729	0.264354	0.0923577	510	0.262887	0.0805444	0.0237461	510	0.00371398	-0.00668752	-0.00183993
510.2	0.877356	0.41621	0.161964	580.2	0.177221	0.0789671	0.0350985	517.8	0.36456	0.123328	0.0366785	510.2	0.448181	0.264127	0.0920558	510.2	0.26221	0.0802394	0.0230399	510.2	0.00392814	-0.00707465	-0.00208378
510.4	0.876852	0.415398	0.162085	580.4	0.177162	0.0790815	0.0351551	518	0.363675	0.123171	0.0361921	510.4	0.447636	0.263891	0.091506	510.4	0.261851	0.0804833	0.0236669	510.4	0.00406324	-0.00694067	-0.00257718
510.6	0.876223	0.414859	0.161269	580.6	0.176564	0.0787341	0.0346147	518.2	0.362883	0.123247	0.0362562	510.6	0.447628	0.263991	0.0915822	510.6	0.261156	0.0801433	0.0235127	510.6	0.00382302	-0.00693357	-0.00263969
510.8	0.875511	0.414857	0.160973	580.8	0.17634	0.0779324	0.0345585	518.4	0.361971	0.12251	0.0361144	510.8	0.447376	0.26354	0.0918722	510.8	0.260725	0.0800156	0.0232885	510.8	0.00341038	-0.00734117	-0.00303084
511	0.875528	0.415559	0.160799	581	0.176442	0.0776893	0.0347199	518.6	0.361456	0.122832	0.036051	511	0.446924	0.262947	0.0918472	511	0.260202	0.0805342	0.0234204	511	0.00295642	-0.00712015	-0.00365296
511.2	0.875391	0.415677	0.160979	581.2	0.176668	0.0777382	0.0348194	518.8	0.361176	0.123127	0.0359186	511.2	0.447007	0.262759	0.0921556	511.2	0.259355	0.0796507	0.0229974	511.2	0.00299741	-0.00702767	-0.00410266
511.4	0.875917	0.415844	0.161121	581.4	0.17647	0.0770509	0.0350947	519	0.360583	0.123156	0.0360349	511.4	0.446342	0.262499	0.0922302	511.4	0.259107	0.0790616	0.023016	511.4	0.0030507	-0.00722991	-0.00398646
511.6	0.875566	0.416672	0.161185	581.6	0.175664	0.0768631	0.0347669	519.2	0.360032	0.122874	0.035703	511.6	0.446366	0.261938	0.0923372	511.6	0.258818	0.078669	0.0228	511.6	0.00347996	-0.00687164	-0.003387
511.8	0.875003	0.416267	0.160682	581.8	0.175231	0.0771101	0.0347685	519.4	0.35921	0.122717	0.0357974	511.8	0.446156	0.261757	0.0927901	511.8	0.258629	0.0782519	0.0232156	511.8	0.00325871	-0.00717284	-0.00389377
512	0.874604	0.416437	0.160251	582	0.17469	0.0764499	0.0341814	519.6	0.358628	0.12214	0.0359611	512	0.446058	0.261749	0.0927329	512	0.257917	0.0784797	0.022901	512	0.00290513	-0.00720811	-0.00409369
512.2	0.874586	0.416313	0.159763	582.2	0.173799	0.0757814	0.0335343	519.8	0.358688	0.121945	0.0365798	512.2	0.445708	0.261674	0.0931452	512.2	0.257587	0.0780663	0.0229084	512.2	0.00302266	-0.00713126	-0.00402279
512.4	0.874046	0.416422	0.159537	582.4	0.173459	0.0756155	0.0333078	520	0.358395	0.121631	0.03652	512.4	0.445452	0.261528	0.0935454	512.4	0.257602	0.0783226	0.0236386	512.4	0.00304968	-0.00744361	-0.00443639
512.6	0.873963	0.416625	0.159993	582.6	0.17283	0.0760874	0.03335	520.2	0.358147	0.121458	0.0371629	512.6	0.444917	0.260727	0.0932619	512.6	0.257575	0.0780934	0.0239291	512.6	0.00309374	-0.00714796	-0.00420388
512.8	0.874666	0.41767	0.160228	582.8	0.172393	0.0760522	0.033004	520.4	0.357344	0.120455	0.0369692	512.8	0.444672	0.261073	0.0931439	512.8	0.257847	0.07805	0.0240772	512.8	0.00412417	-0.00667941	-0.00377276
513	0.874611	0.417607	0.159865	583	0.172355	0.0762294	0.0333809	520.6	0.356495	0.120405	0.0370735	513	0.444273	0.260992	0.0931564	513	0.257118	0.0779696	0.0239913	513	0.00469716	-0.00631041	-0.00382471
513.2	0.87404	0.417358	0.159483	583.2	0.172944	0.0763842	0.0335503	520.8	0.356156	0.120303	0.0378966	513.2	0.443951	0.260458	0.0929909	513.2	0.256614	0.0776771	0.0232642	513.2	0.00517987	-0.00580552	-0.00363789
513.4	0.872959	0.416439	0.158955	583.4	0.173059	0.0758804	0.0335603	521	0.355463	0.119949	0.0379251	513.4	0.444012	0.260534	0.0928323	513.4	0.256292	0.0777579	0.0231784	513.4	0.0052812	-0.00539382	-0.00328156
513.6	0.873033	0.416185	0.158895	583.6	0.172922	0.0762732	0.0334464	521.2	0.354803	0.11999	0.0376293	513.6	0.443426	0.260333	0.0924524	513.6	0.256804	0.0776943	0.0235506	513.6	0.00584876	-0.00456795	-0.00255704
513.8	0.872514	0.415748	0.15888	583.8	0.173474	0.0764303	0.0338183	521.4	0.354265	0.120208	0.0376271	513.8	0.443095	0.260015	0.0917628	513.8	0.256094	0.0776882	0.0228474	513.8	0.00623841	-0.00445114	-0.0016424
514	0.87221	0.415142	0.159433	584	0.173259	0.0763827	0.0335258	521.6	0.353646	0.120071	0.0370865	514	0.442146	0.259854	0.0908253	514	0.255812	0.0775254	0.0230201	514	0.00555792	-0.00500483	-0.00208703
514.2	0.872169	0.414917	0.159839	584.2	0.173122	0.0756323	0.0328043	521.8	0.353091	0.119536	0.0365941	514.2	0.441624	0.260114	0.0904583	514.2	0.255918	0.0774633	0.0227418	514.2	0.00570878	-0.00471442	-0.00216782
514.4	0.871875	0.414981	0.160421	584.4	0.173106	0.0760535	0.0331891	522	0.353001	0.119749	0.0367304	514.4	0.441439	0.260252	0.0907923	514.4	0.255887	0.0776805	0.0230261	514.4	0.00515597	-0.0044699	-0.00238032
514.6	0.87129	0.414538	0.160021	584.6	0.172532	0.075565	0.0328896	522.2	0.352436	0.119816	0.0369335	514.6	0.441126	0.260404	0.090587	514.6	0.255916	0.0776318	0.022155	514.6	0.00475435	-0.00442728	-0.00216213
514.8	0.871146	0.414448	0.160584	584.8	0.172436	0.0753265	0.033247	522.4	0.351597	0.119217	0.0365323	514.8	0.440295	0.25947	0.0902242	514.8	0.25531	0.0771201	0.0214784	514.8	0.00417764	-0.00464471	-0.00213375
515	0.87155	0.414348	0.160879	585	0.172324	0.0752209	0.0333794	522.6	0.351172	0.119519	0.0362781	515	0.440272	0.25935	0.0906654	515	0.254954	0.077283	0.0209877	515	0.00357421	-0.00490917	-0.00286661
515.2	0.871135	0.413788	0.161391	585.2	0.172809	0.0756568	0.0338071	522.8	0.351352	0.119668	0.0365369	515.2	0.439722	0.259268	0.0905317	515.2	0.25465	0.0763023	0.0205297	515.2	0.00291595	-0.00580895	-0.00302577
515.4	0.870418	0.41301	0.160521	585.4	0.172445	0.075681	0.033266	523	0.351363	0.119753	0.0368011	515.4	0.43936	0.259131	0.0898516	515.4	0.254396	0.0758409	0.0202633	515.4	0.00180919	-0.0071261	-0.00342075
515.6	0.869354	0.412325	0.15976	585.6	0.172047	0.0756118	0.0328148	523.2	0.350857	0.119499	0.036382	515.6	0.439546	0.2591	0.0899782	515.6	0.253916	0.0760741	0.0207635	515.6	0.00081842	-0.00752452	-0.00379749
515.8	0.868969	0.411313	0.159276	585.8	0.172369	0.0758061	0.0329479	523.4	0.350128	0.11911	0.036189	515.8	0.439192	0.259176	0.0898705	515.8	0.25375	0.0767076	0.0214342	515.8	0.00022014	-0.00831349	-0.00467472
516	0.868524	0.410831	0.159263	586	0.172003	0.0749672	0.0323373	523.6	0.349996	0.118658	0.0356339	516	0.438762	0.25933	0.0898973	516	0.253446	0.076875	0.0212065	516	0.00036818	-0.00844735	-0.00459031
516.2	0.868543	0.410839	0.159195	586.2	0.171952	0.0752949	0.032724	523.8	0.34978	0.118226	0.0352507	516.2	0.438637	0.259303	0.0907264	516.2	0.253504	0.0769743	0.0218865	516.2	0.0002934	-0.00858313	-0.00449846
516.4	0.868504	0.411198	0.159654	586.4	0.1719	0.0754809	0.0326843	524	0.349113	0.117831	0.034973	516.4	0.437978	0.258988	0.0906244	516.4	0.253233	0.0776646	0.022194	516.4	0.00031027	-0.00880253	-0.00467571
516.6	0.868482	0.411318	0.159482	586.6	0.171686	0.0757443	0.033078	524.2	0.348485	0.117391	0.0348929	516.6	0.437641	0.259135	0.0907277	516.6	0.253124	0.078187	0.0227648	516.6	0.00079507	-0.00842461	-0.00450036
516.8	0.868377	0.411446	0.15904	586.8	0.171378	0.0747788	0.0330329	524.4	0.347862	0.11697	0.0348861	516.8	0.437259	0.259492	0.0905623	516.8	0.252919	0.0788706	0.0230177	516.8	0.00184943	-0.00756917	-0.00426476
517	0.868161	0.411124	0.158888	587	0.172025	0.0753732	0.0332949	524.6	0.347328	0.116789	0.0352148	517	0.437524	0.259379	0.0909341	517	0.252256	0.0790331	0.023489	517	0.00256247	-0.00680393	-0.00403154
517.2	0.867645	0.411444	0.158786	587.2	0.171947	0.0755084	0.0327577	524.8	0.346699	0.116392	0.0353726	517.2	0.436811	0.259464	0.0905592	517.2	0.252157	0.0790952	0.0237952	517.2	0.0029864	-0.00639284	-0.00369022
517.4	0.867446	0.410927	0.158427	587.4	0.171889	0.0756564	0.0328394	525	0.345869	0.116468	0.0352988	517.4	0.436282	0.259166	0.0899498	517.4	0.25199	0.0791399	0.024415	517.4	0.00347056	-0.00599671	-0.0031605
517.6	0.867778	0.411037	0.158593	587.6	0.171832	0.0761045	0.0327467	525.2	0.344892	0.116177	0.0351304	517.6	0.435495	0.258953	0.0894794	517.6	0.252025	0.0785569	0.0244586	517.6	0.00415305	-0.00546825	-0.00304344
517.8	0.86743	0.411426	0.15877	587.8	0.171467	0.0756904	0.0324214	525.4	0.344338	0.115922	0.0357519	517.8	0.434808	0.258544	0.0888599	517.8	0.251537	0.0781659	0.0237379	517.8	0.00459763	-0.00512118	-0.00234668
518	0.867181	0.411564	0.159151	588	0.170586	0.0751804	0.0315073	525.6	0.344005	0.115959	0.0363958	518	0.434206	0.258172	0.0883737	518	0.251168	0.0777774	0.0237045	518	0.00446745	-0.00492716	-0.00228726
518.2	0.867432	0.412231	0.159328	588.2	0.170491	0.0749096	0.0315317	525.8	0.343217	0.115798	0.0364114	518.2	0.43407	0.257811	0.0886648	518.2	0.251603	0.0775505	0.0239075	518.2	0.00505935	-0.00484084	-0.00213344
518.4	0.866703	0.412135	0.158837	588.4	0.170251	0.0746598	0.0320253	526	0.34307	0.115797	0.0365897	518.4	0.433537	0.257767	0.088976	518.4	0.251321	0.0774134	0.0237133	518.4	0.00459486	-0.00517807	-0.00204767
518.6	0.866212	0.411861	0.158671	588.6	0.169669	0.0738476	0.0317558	526.2	0.342065	0.115919	0.0366007	518.6	0.432681	0.256784	0.0881947	518.6	0.250461	0.0763679	0.0222159	518.6	0.00434865	-0.00574777	-0.00175657
518.8	0.865459	0.412215	0.15863	588.8	0.169278	0.0733225	0.0318906	526.4	0.341572	0.11527	0.0364958	518.8	0.432458	0.256017	0.0881238	518.8	0.249536	0.0758088	0.0215193	518.8	0.00352294	-0.00641003	-0.00176964
519	0.865011	0.412163	0.158324	589	0.168919	0.0728671	0.0315527	526.6	0.341269	0.11561	0.0367415	519	0.432501	0.25607	0.0880717	519	0.249508	0.0763427	0.0216507	519	0.0030013	-0.00716307	-0.00237382
519.2	0.864168	0.411863	0.157906	589.2	0.169511	0.0730846	0.031858	526.8	0.340896	0.115801	0.0372229	519.2	0.431959	0.255921	0.0871896	519.2	0.248669	0.0751042	0.0215323	519.2	0.00185977	-0.00804407	-0.00247775
519.4	0.862933	0.411672	0.157597	589.4	0.169369	0.0727073	0.0313846	527	0.340472	0.115467	0.0369452	519.4	0.431938	0.255756	0.0873306	519.4	0.247452	0.0745486	0.0210542	519.4	0.00151785	-0.0084	-0.00319268
519.6	0.862435	0.411487	0.158272	589.6	0.169637	0.0722862	0.0316537	527.2	0.339465	0.115244	0.0364917	519.6	0.431655	0.25561	0.0878721	519.6	0.246647	0.0746711	0.0212542	519.6	0.00118716	-0.00838397	-0.00361187
519.8	0.862158	0.411659	0.158412	589.8	0.169859	0.0723694	0.0319112	527.4	0.338021	0.114123	0.035706	519.8	0.431073	0.255479	0.087934	519.8	0.246255	0.0747253	0.0208745	519.8	0.00142835	-0.00841795	-0.0034442
520	0.861286	0.411308	0.158766	590	0.169858	0.0716535	0.0318888	527.6	0.337842	0.113762	0.0352927	520	0.430734	0.255281	0.0884323	520	0.245708	0.0744008	0.0205062	520	0.00129082	-0.00842256	-0.00324966
520.2	0.861137	0.411064	0.157997	590.2	0.169735	0.0716152	0.0318947	527.8	0.337227	0.113599	0.0351422	520.2	0.430904	0.255044	0.0885672	520.2	0.245517	0.0747499	0.0210702	520.2	0.00058876	-0.0081877	-0.00360715
520.4	0.8605	0.410815	0.15817	590.4	0.169652	0.0719375	0.0321564	528	0.336261	0.113602	0.0351317	520.4	0.430899	0.255138	0.088976	520.4	0.245469	0.0751857	0.0209051	520.4	0.00036238	-0.00852875	-0.00393329
520.6	0.860219	0.410575	0.157545	590.6	0.169994	0.0717882	0.0323674	528.2	0.335807	0.113205	0.0348659	520.6	0.431204	0.255654	0.0898074	520.6	0.245612	0.0752189	0.0211802	520.6	0.00040455	-0.00823857	-0.00383537
520.8	0.859952	0.410248	0.157526	590.8	0.170255	0.0715408	0.0318999	528.4	0.335125	0.112378	0.0347759	520.8	0.430826	0.255414	0.089551	520.8	0.245201	0.0754938	0.0211669	520.8	0.00034554	-0.00818815	-0.00406415
521	0.860414	0.40991	0.15785	591	0.171077	0.0727357	0.0320146	528.6	0.334645	0.112299	0.0344464	521	0.430771	0.255256	0.0902051	521	0.244652	0.0750642	0.0210417	521	0.00065393	-0.00800511	-0.00455822
521.2	0.860289	0.409697	0.157996	591.2	0.170786	0.0732906	0.0319658	528.8	0.334262	0.11246	0.0343864	521.2	0.42993	0.254651	0.089513	521.2	0.244618	0.0747738	0.0208097	521.2	0.00136571	-0.00756971	-0.00432304
521.4	0.860207	0.408814	0.157613	591.4	0.171119	0.0740091	0.0325695	529	0.333862	0.112714	0.0346636	521.4	0.430314	0.25433	0.0893543	521.4	0.244558	0.0747923	0.0208059	521.4	0.00185233	-0.00715213	-0.00392994
521.6	0.86011	0.408527	0.157249	591.6	0.170876	0.0737954	0.0321497	529.2	0.333383	0.112342	0.0353089	521.6	0.430049	0.254269	0.0893352	521.6	0.244207	0.0739057	0.0203747	521.6	0.00211943	-0.00714707	-0.00414553
521.8	0.85989	0.408468	0.15672	591.8	0.170434	0.0734192	0.0315801	529.4	0.333097	0.11273	0.0356921	521.8	0.429503	0.254275	0.0889861	521.8	0.244535	0.0744888	0.0206925	521.8	0.00282075	-0.00680974	-0.00335849
522	0.860196	0.408334	0.156561	592	0.170604	0.0733239	0.0316067	529.6	0.332598	0.112909	0.0355169	522	0.42881	0.253754	0.0886366	522	0.245221	0.0752985	0.0215778	522	0.00270398	-0.00686168	-0.0038038
522.2	0.860404	0.408414	0.156974	592.2	0.170672	0.0730628	0.0317349	529.8	0.331707	0.112778	0.0343956	522.2	0.428234	0.253168	0.0885757	522.2	0.245879	0.075536	0.0223548	522.2	0.00281941	-0.00687897	-0.00426274
522.4	0.859479	0.408128	0.156379	592.4	0.170482	0.0728125	0.0315823	530	0.331805	0.112858	0.0341709	522.4	0.428144	0.253571	0.0889066	522.4	0.245607	0.075412	0.0225553	522.4	0.0023512	-0.00680055	-0.00403091
522.6	0.858877	0.407941	0.156158	592.6	0.169891	0.0731858	0.0313476	530.2	0.331507	0.11348	0.034197	522.6	0.427673	0.253275	0.0881857	522.6	0.245592	0.0752253	0.0224257	522.6	0.00256303	-0.00687546	-0.00374755
522.8	0.858437	0.408279	0.156255	592.8	0.169706	0.0735868	0.0317462	530.4	0.331244	0.11292	0.0339116	522.8	0.427958	0.254067	0.0886837	522.8	0.24597	0.0759377	0.0229428	522.8	0.0025797	-0.00689597	-0.00384654
523	0.858063	0.407611	0.156381	593	0.169516	0.0739055	0.0314267	530.6	0.330821	0.112733	0.0339331	523	0.427296	0.254074	0.0884962	523	0.246189	0.0759928	0.0230985	523	0.00261094	-0.00707797	-0.00381518
523.2	0.857692	0.40741	0.15649	593.2	0.169632	0.0739539	0.0313072	530.8	0.330141	0.112346	0.0337181	523.2	0.426528	0.254061	0.088549	523.2	0.245792	0.0751386	0.022543	523.2	0.00263415	-0.00714391	-0.00417531
523.4	0.856668	0.407205	0.156625	593.4	0.169776	0.0744363	0.0313101	531	0.329904	0.111823	0.0331627	523.4	0.426266	0.254493	0.0891178	523.4	0.245441	0.0746607	0.0220082	523.4	0.00307812	-0.00671532	-0.00432837
523.6	0.856515	0.406959	0.157172	593.6	0.169475	0.0742901	0.0312033	531.2	0.328868	0.111442	0.0326404	523.6	0.425831	0.255008	0.0894043	523.6	0.244922	0.0745398	0.0220111	523.6	0.00288758	-0.00684964	-0.00431004
523.8	0.855775	0.407311	0.157058	593.8	0.169502	0.0740215	0.0308672	531.4	0.328103	0.110929	0.0323467	523.8	0.425685	0.255458	0.0895278	523.8	0.244262	0.0741276	0.0217332	523.8	0.00272627	-0.00665544	-0.00402987
524	0.855124	0.407167	0.157336	594	0.169231	0.0734621	0.0308675	531.6	0.327944	0.110838	0.0326549	524	0.425317	0.25518	0.0896811	524	0.243484	0.0740949	0.0215705	524	0.00275766	-0.00670829	-0.00412764
524.2	0.855354	0.407212	0.157026	594.2	0.168642	0.0733135	0.030365	531.8	0.327428	0.110505	0.0328131	524.2	0.425641	0.255401	0.0897567	524.2	0.243447	0.073911	0.0211638	524.2	0.00246649	-0.00634024	-0.00412949
524.4	0.854969	0.407239	0.157242	594.4	0.168232	0.0733693	0.0305272	532	0.32717	0.110172	0.0331761	524.4	0.425293	0.255523	0.0900731	524.4	0.242454	0.0734421	0.0200672	524.4	0.00214005	-0.00663179	-0.00386326
524.6	0.854869	0.406826	0.157018	594.6	0.168137	0.0730891	0.0299712	532.2	0.326551	0.10977	0.0330245	524.6	0.424832	0.255298	0.0898684	524.6	0.241605	0.0729011	0.019353	524.6	0.0020118	-0.00672532	-0.00402984
524.8	0.854652	0.406343	0.157291	594.8	0.167788	0.0729267	0.0300627	532.4	0.326215	0.109356	0.0327993	524.8	0.424321	0.255017	0.089868	524.8	0.240683	0.0733723	0.0190997	524.8	0.00193662	-0.00675977	-0.0044862
525	0.854744	0.406142	0.157153	595	0.168249	0.073753	0.0309254	532.6	0.326061	0.109784	0.0328197	525	0.424249	0.254577	0.0900098	525	0.239986	0.0723842	0.0181666	525	0.00210288	-0.00666196	-0.00453826
525.2	0.854581	0.406217	0.156829	595.2	0.16799	0.0737076	0.0309282	532.8	0.325125	0.108772	0.0329029	525.2	0.423651	0.253663	0.0890343	525.2	0.239285	0.0720882	0.0175647	525.2	0.00263018	-0.0061156	-0.00402466
525.4	0.854443	0.405691	0.155959	595.4	0.168237	0.0737399	0.0309905	533	0.324561	0.10845	0.0335131	525.4	0.423417	0.253332	0.0886827	525.4	0.238503	0.0720908	0.0170057	525.4	0.00239942	-0.00605562	-0.00406952
525.6	0.854379	0.406078	0.155699	595.6	0.168101	0.0734524	0.0307669	533.2	0.323639	0.108422	0.034002	525.6	0.422894	0.25332	0.0883835	525.6	0.237917	0.071736	0.0163289	525.6	0.00240465	-0.00583481	-0.00410382
525.8	0.854645	0.40687	0.155949	595.8	0.168189	0.0732778	0.0308775	533.4	0.322813	0.10815	0.03364	525.8	0.422461	0.253352	0.0881299	525.8	0.23811	0.0726367	0.017046	525.8	0.00231737	-0.0056768	-0.00439704
526	0.854858	0.406601	0.155963	596	0.168636	0.073289	0.031412	533.6	0.322135	0.108084	0.0334701	526	0.422262	0.25291	0.0879458	526	0.238	0.0722828	0.0176959	526	0.0021581	-0.00581511	-0.00484507
526.2	0.854353	0.406316	0.155535	596.2	0.168359	0.0729647	0.0311619	533.8	0.321263	0.1078	0.0329297	526.2	0.422527	0.252269	0.0878323	526.2	0.237115	0.0719081	0.0180899	526.2	0.00214753	-0.00590037	-0.00530851
526.4	0.853943	0.406416	0.154799	596.4	0.168283	0.0736217	0.0315534	534	0.321111	0.107736	0.0333613	526.4	0.42208	0.252465	0.0878743	526.4	0.237157	0.0715475	0.0183303	526.4	0.00280153	-0.00536942	-0.00430219
526.6	0.854114	0.406506	0.154662	596.6	0.168419	0.0740274	0.0319621	534.2	0.320821	0.108353	0.0334104	526.6	0.421248	0.251461	0.0876658	526.6	0.237305	0.0713222	0.0182738	526.6	0.00337773	-0.00527648	-0.00369486
526.8	0.854115	0.406175	0.154873	596.8	0.168325	0.0741768	0.0322181	534.4	0.320257	0.107559	0.0332604	526.8	0.421195	0.251194	0.0885221	526.8	0.237201	0.0710399	0.0187016	526.8	0.00322756	-0.0053657	-0.00373889
527	0.853893	0.40582	0.154658	597	0.168196	0.0740216	0.0321852	534.6	0.319794	0.107307	0.0330361	527	0.420205	0.250533	0.0881041	527	0.236941	0.0705906	0.0190489	527	0.0038675	-0.0049462	-0.00323407
527.2	0.853533	0.405718	0.154658	597.2	0.168271	0.07405	0.0320057	534.8	0.318924	0.10759	0.0330097	527.2	0.419889	0.250035	0.0880693	527.2	0.237126	0.0704099	0.0196132	527.2	0.00400485	-0.00489327	-0.00346283
527.4	0.852756	0.405526	0.154426	597.4	0.168624	0.0744065	0.0322012	535	0.318279	0.10759	0.0325732	527.4	0.41903	0.250099	0.0879707	527.4	0.236818	0.0700664	0.020327	527.4	0.00384547	-0.00484459	-0.00328963
527.6	0.852649	0.405994	0.154534	597.6	0.168347	0.073877	0.0320512	535.2	0.317348	0.107465	0.0320008	527.6	0.41839	0.249699	0.0881416	527.6	0.236526	0.0704771	0.0211647	527.6	0.00381609	-0.00503521	-0.00301122
527.8	0.852305	0.406259	0.154143	597.8	0.168152	0.0738947	0.032123	535.4	0.316785	0.10719	0.0319664	527.8	0.418556	0.249787	0.0883127	527.8	0.236313	0.0705156	0.0218628	527.8	0.00373835	-0.00448945	-0.00253103
528	0.851832	0.405719	0.154034	598	0.167824	0.0739365	0.0322588	535.6	0.315496	0.106403	0.0313434	528	0.418301	0.249689	0.088522	528	0.236369	0.0708095	0.0224509	528	0.00392508	-0.00446749	-0.00224054
528.2	0.850927	0.404669	0.153427	598.2	0.167084	0.0736201	0.0316203	535.8	0.315193	0.106003	0.0310934	528.2	0.418522	0.249581	0.0883502	528.2	0.23639	0.0707451	0.0224247	528.2	0.00335864	-0.0047916	-0.00200431
528.4	0.85055	0.40426	0.153945	598.4	0.167147	0.0738797	0.0317948	536	0.314285	0.105416	0.0309871	528.4	0.418121	0.249712	0.088033	528.4	0.235781	0.0709177	0.0219674	528.4	0.00331299	-0.00456808	-0.00163248
528.6	0.849742	0.403733	0.153777	598.6	0.166675	0.0739119	0.0314702	536.2	0.31293	0.104693	0.029937	528.6	0.417593	0.249607	0.0878412	528.6	0.235977	0.0711777	0.0220205	528.6	0.00302973	-0.00464526	-0.00168521
528.8	0.849333	0.403855	0.153717	598.8	0.166461	0.0738223	0.0316093	536.4	0.312667	0.104141	0.0295274	528.8	0.417452	0.249254	0.0880559	528.8	0.235013	0.0711979	0.0215404	528.8	0.0028496	-0.00484246	-0.00231479
529	0.849104	0.403921	0.153862	599	0.166711	0.0737739	0.0316738	536.6	0.3122	0.103657	0.0291511	529	0.417011	0.248661	0.0873708	529	0.234213	0.0702289	0.0204078	529	0.0022981	-0.00492305	-0.00216785
529.2	0.849313	0.404161	0.154451	599.2	0.166152	0.0731487	0.0307039	536.8	0.311526	0.102831	0.029444	529.2	0.416302	0.248264	0.0871178	529.2	0.23416	0.0708054	0.0201562	529.2	0.0024902	-0.0046471	-0.00242912
529.4	0.849008	0.403936	0.154876	599.4	0.16585	0.0731632	0.0306121	537	0.311527	0.103218	0.0294438	529.4	0.416279	0.248315	0.0871032	529.4	0.233956	0.0713945	0.0204213	529.4	0.00242032	-0.00458672	-0.0020716
529.6	0.849555	0.404843	0.155857	599.6	0.165728	0.0731022	0.0308869	537.2	0.311225	0.103271	0.0294318	529.6	0.416252	0.248578	0.0872527	529.6	0.233769	0.0712227	0.0200838	529.6	0.00241541	-0.0049922	-0.00282993
529.8	0.849301	0.404776	0.156135	599.8	0.165694	0.0734099	0.0311572	537.4	0.311146	0.10331	0.0292702	529.8	0.416506	0.248403	0.0871251	529.8	0.233415	0.0712026	0.0196068	529.8	0.00293338	-0.00481658	-0.00293034
530	0.849141	0.404055	0.15587	600	0.16589	0.0734465	0.0314365	537.6	0.311039	0.103544	0.0292845	530	0.416509	0.24819	0.0870984	530	0.232794	0.0708627	0.0190754	530	0.00299526	-0.00531026	-0.00335778
530.2	0.849187	0.404371	0.155864	600.2	0.16604	0.0736591	0.0314089	537.8	0.310987	0.103571	0.0295985	530.2	0.416446	0.248104	0.0870736	530.2	0.232005	0.0708761	0.0187199	530.2	0.00281576	-0.00552962	-0.00379302
530.4	0.849264	0.404573	0.156088	600.4	0.165791	0.0736677	0.0313996	538	0.310679	0.104029	0.029706	530.4	0.415979	0.247951	0.0869742	530.4	0.231374	0.0702576	0.01813	530.4	0.00286348	-0.00570784	-0.00364799
530.6	0.849132	0.404476	0.156277	600.6	0.166181	0.0742722	0.0314415	538.2	0.310879	0.104454	0.0298297	530.6	0.415822	0.247445	0.0869533	530.6	0.230725	0.0695141	0.0175991	530.6	0.00265874	-0.00597465	-0.00373188
530.8	0.848779	0.404404	0.15636	600.8	0.165724	0.0744669	0.0311954	538.4	0.310381	0.104024	0.029809	530.8	0.415461	0.247493	0.0870375	530.8	0.230615	0.0693984	0.0179933	530.8	0.00230189	-0.00592821	-0.00419187
531	0.848244	0.404267	0.156377	601	0.166278	0.0747485	0.0316318	538.6	0.310488	0.104656	0.02976	531	0.414666	0.247254	0.086474	531	0.230672	0.0696556	0.0183	531	0.00264874	-0.00604981	-0.00405511
531.2	0.847448	0.403584	0.156019	601.2	0.166836	0.0751431	0.0313499	538.8	0.310347	0.105439	0.0301516	531.2	0.413979	0.246462	0.0864996	531.2	0.23099	0.0699972	0.0187435	531.2	0.00198822	-0.00623517	-0.00410809
531.4	0.846796	0.403649	0.155562	601.4	0.167434	0.0756869	0.0319737	539	0.310818	0.106173	0.0304411	531.4	0.412912	0.245977	0.0860761	531.4	0.230945	0.0702765	0.0192509	531.4	0.00167786	-0.00626611	-0.00429114
531.6	0.846466	0.403603	0.154692	601.6	0.167362	0.0758743	0.0320631	539.2	0.309937	0.105605	0.0298766	531.6	0.412768	0.246198	0.0864137	531.6	0.231208	0.0710153	0.0195416	531.6	0.00192149	-0.00573325	-0.00398913
531.8	0.845511	0.402993	0.154159	601.8	0.167182	0.0760254	0.0319005	539.4	0.309408	0.105499	0.0300651	531.8	0.412806	0.246393	0.0864425	531.8	0.231558	0.0709381	0.019643	531.8	0.00158218	-0.00557093	-0.00402564
532	0.844077	0.402064	0.153547	602	0.167366	0.0757773	0.0316391	539.6	0.308236	0.104793	0.0295256	532	0.412779	0.246335	0.0865433	532	0.231631	0.0708789	0.0195187	532	0.0014761	-0.00583144	-0.00389543
532.2	0.843373	0.401132	0.152887	602.2	0.167031	0.0753903	0.0317741	539.8	0.30798	0.104602	0.0295837	532.2	0.41209	0.24527	0.0857845	532.2	0.231399	0.0707863	0.0193491	532.2	0.00129614	-0.00568484	-0.00375544
532.4	0.843363	0.401033	0.153107	602.4	0.16689	0.0757641	0.031768	540	0.30728	0.104535	0.0302927	532.4	0.411692	0.24544	0.085421	532.4	0.23095	0.0707503	0.0194739	532.4	0.00146867	-0.00475084	-0.00274791
532.6	0.842769	0.400736	0.152122	602.6	0.165799	0.0747065	0.0316415	540.2	0.307295	0.104401	0.0304579	532.6	0.411833	0.245602	0.085647	532.6	0.230743	0.0707768	0.0194616	532.6	0.00115906	-0.00448881	-0.00274456
532.8	0.842359	0.400757	0.152241	602.8	0.165164	0.0739494	0.0311227	540.4	0.306594	0.103788	0.0305869	532.8	0.411938	0.245204	0.085825	532.8	0.23004	0.070684	0.0194815	532.8	0.00126182	-0.00421219	-0.00267387
533	0.84215	0.400459	0.152167	603	0.165081	0.0731332	0.0308944	540.6	0.306088	0.103518	0.0305452	533	0.411623	0.245139	0.0858092	533	0.230068	0.070681	0.0197331	533	0.00116023	-0.00378364	-0.0023021
533.2	0.841989	0.400395	0.151984	603.2	0.164632	0.0727746	0.0307327	540.8	0.305941	0.103417	0.0309038	533.2	0.411189	0.245062	0.0860984	533.2	0.229973	0.0709817	0.020151	533.2	0.00147861	-0.00401282	-0.0025703
533.4	0.841154	0.399654	0.152023	603.4	0.164731	0.0725129	0.0311964	541	0.305376	0.103207	0.0307871	533.4	0.411298	0.244943	0.0865347	533.4	0.229755	0.0705287	0.0199604	533.4	0.00178862	-0.00392895	-0.00214997
533.6	0.841692	0.400042	0.152346	603.6	0.164883	0.0726577	0.0314522	541.2	0.304497	0.102653	0.0305942	533.6	0.411351	0.24518	0.0866129	533.6	0.229433	0.0702837	0.0191288	533.6	0.00216603	-0.00416554	-0.00263416
533.8	0.841261	0.399859	0.152218	603.8	0.164807	0.0724351	0.0315637	541.4	0.303427	0.10205	0.0305275	533.8	0.411734	0.245074	0.0865444	533.8	0.228576	0.0698948	0.0183948	533.8	0.00164614	-0.00439032	-0.00247596
534	0.841205	0.399784	0.15223	604	0.165052	0.0723449	0.0314248	541.6	0.302858	0.101279	0.0307324	534	0.411653	0.245504	0.0868566	534	0.22811	0.0695928	0.0190162	534	0.00079739	-0.00583656	-0.00374033
534.2	0.841516	0.399875	0.152741	604.2	0.165104	0.0726895	0.0315907	541.8	0.302586	0.100921	0.0309368	534.2	0.411234	0.245835	0.0867196	534.2	0.228251	0.0693285	0.0191351	534.2	0.00039228	-0.00645957	-0.00440568
534.4	0.8416	0.399447	0.152689	604.4	0.164757	0.0723299	0.031496	542	0.302162	0.100952	0.0305806	534.4	0.411221	0.24605	0.0868057	534.4	0.227065	0.0680287	0.0186193	534.4	0.00041585	-0.00703986	-0.0046058
534.6	0.841706	0.399639	0.153325	604.6	0.164916	0.0733402	0.0320396	542.2	0.302147	0.100965	0.0309227	534.6	0.411066	0.246485	0.0870915	534.6	0.226952	0.0680185	0.0186788	534.6	7.832e-05	-0.00727767	-0.00476294
534.8	0.841846	0.399843	0.153534	604.8	0.164979	0.0733734	0.0321579	542.4	0.301866	0.100513	0.0310955	534.8	0.410274	0.246643	0.086976	534.8	0.227098	0.0681083	0.0186339	534.8	-0.00010351	-0.00771621	-0.00525292
535	0.841531	0.399098	0.153684	605	0.165182	0.0735296	0.0326693	542.6	0.302167	0.100686	0.0310326	535	0.410049	0.246902	0.0872223	535	0.227026	0.0681095	0.0190148	535	0.00022975	-0.00755765	-0.00522913
535.2	0.841234	0.399008	0.153568	605.2	0.165062	0.0740953	0.0325574	542.8	0.301834	0.101076	0.031116	535.2	0.409457	0.246404	0.087172	535.2	0.226651	0.0678849	0.0187165	535.2	-8.743e-05	-0.0075344	-0.00556176
535.4	0.841053	0.399416	0.154019	605.4	0.164826	0.0746106	0.0333468	543	0.301571	0.101091	0.0307926	535.4	0.408573	0.245618	0.0861945	535.4	0.226819	0.0682909	0.018927	535.4	-0.00013483	-0.00747639	-0.00627227
535.6	0.841321	0.398801	0.153702	605.6	0.164182	0.0743259	0.0327682	543.2	0.300106	0.100342	0.0298508	535.6	0.407725	0.245199	0.0860774	535.6	0.226706	0.068722	0.0186801	535.6	0.00062153	-0.00756138	-0.00616547
535.8	0.841419	0.398807	0.154196	605.8	0.163632	0.0739448	0.0323043	543.4	0.299444	0.100373	0.0299352	535.8	0.407082	0.244646	0.0853594	535.8	0.226714	0.0685344	0.0189303	535.8	0.00111892	-0.00745617	-0.00629179
536	0.84131	0.398438	0.15422	606	0.163275	0.0742332	0.0327253	543.6	0.299202	0.100532	0.0299494	536	0.406784	0.244432	0.0850008	536	0.226514	0.0687157	0.0191525	536	0.00123572	-0.00743743	-0.0062949
536.2	0.841507	0.398203	0.154488	606.2	0.162788	0.0742037	0.0328456	543.8	0.299258	0.101221	0.0304369	536.2	0.40632	0.244406	0.0845509	536.2	0.225897	0.0690295	0.0193941	536.2	0.00183069	-0.00695692	-0.00549812
536.4	0.841019	0.398053	0.154295	606.4	0.162228	0.0744858	0.0325559	544	0.298802	0.101541	0.0306914	536.4	0.406603	0.244589	0.0845421	536.4	0.225625	0.0689402	0.019207	536.4	0.00214333	-0.00623573	-0.00512529
536.6	0.840761	0.398035	0.154256	606.6	0.161828	0.0738337	0.0320052	544.2	0.298283	0.101226	0.030228	536.6	0.406859	0.244574	0.0847902	536.6	0.225456	0.0695442	0.0193948	536.6	0.0022936	-0.00615473	-0.00539759
536.8	0.8402	0.397967	0.154335	606.8	0.161875	0.0740168	0.0316677	544.4	0.297067	0.100607	0.0299306	536.8	0.406905	0.24426	0.0848553	536.8	0.225051	0.0694386	0.0194871	536.8	0.00278506	-0.00604023	-0.00468529
537	0.839831	0.397748	0.154029	607	0.162159	0.0740588	0.0316374	544.6	0.297176	0.10137	0.0299505	537	0.40659	0.244042	0.0851289	537	0.224666	0.0693755	0.0189783	537	0.00308652	-0.006203	-0.00483667
537.2	0.839049	0.39748	0.153709	607.2	0.162462	0.0741132	0.0318071	544.8	0.296553	0.100782	0.0296907	537.2	0.406283	0.24375	0.0851119	537.2	0.224284	0.0694836	0.0187709	537.2	0.00352632	-0.00593654	-0.00457873
537.4	0.838169	0.39704	0.153733	607.4	0.162901	0.0742736	0.031713	545	0.295489	0.100159	0.0293155	537.4	0.406285	0.243755	0.0853565	537.4	0.224186	0.0694562	0.0189492	537.4	0.00379818	-0.00538253	-0.00407769
537.6	0.83799	0.397388	0.153484	607.6	0.162968	0.074402	0.0315746	545.2	0.294938	0.100112	0.0288347	537.6	0.406271	0.243768	0.0850137	537.6	0.224287	0.0694868	0.0194688	537.6	0.0033769	-0.00578109	-0.0038704
537.8	0.837477	0.397153	0.152879	607.8	0.163408	0.0743533	0.0317202	545.4	0.29447	0.100032	0.0288646	537.8	0.406141	0.243544	0.0851133	537.8	0.224187	0.0692394	0.0197364	537.8	0.00259827	-0.00632172	-0.00423291
538	0.836594	0.396828	0.15226	608	0.163652	0.0747481	0.0317363	545.6	0.294673	0.0997704	0.0287387	538	0.406556	0.244581	0.0856551	538	0.224065	0.0690086	0.0201482	538	0.00241555	-0.00624001	-0.00458521
538.2	0.836172	0.396108	0.151731	608.2	0.163801	0.0747009	0.03198	545.8	0.294455	0.0996247	0.0287393	538.2	0.406217	0.244807	0.0855953	538.2	0.223933	0.0685757	0.0197815	538.2	0.00223173	-0.00644626	-0.0046689
538.4	0.835742	0.395946	0.151161	608.4	0.163558	0.0742885	0.0320704	546	0.294028	0.099464	0.0283394	538.4	0.406265	0.244829	0.085745	538.4	0.222605	0.0678439	0.0194284	538.4	0.00163912	-0.00692043	-0.0048499
538.6	0.835496	0.395664	0.150766	608.6	0.163632	0.0746426	0.0320447	546.2	0.293283	0.099134	0.028407	538.6	0.405834	0.244562	0.0860001	538.6	0.22281	0.0685516	0.019481	538.6	0.0014089	-0.00717048	-0.00471403
538.8	0.835212	0.395697	0.150199	608.8	0.163977	0.0743002	0.0319351	546.4	0.292706	0.0978747	0.0276266	538.8	0.404842	0.24474	0.0858492	538.8	0.22278	0.0682543	0.0194986	538.8	0.00136236	-0.00688263	-0.00429538
539	0.834451	0.394652	0.149939	609	0.163937	0.0743589	0.0321447	546.6	0.292401	0.0978849	0.0273356	539	0.404414	0.244741	0.0858056	539	0.222104	0.0677577	0.0195484	539	0.00126108	-0.00687784	-0.00373905
539.2	0.83419	0.394787	0.149836	609.2	0.163935	0.0745592	0.0321883	546.8	0.291781	0.0973706	0.0274573	539.2	0.403209	0.244013	0.0853913	539.2	0.221746	0.067824	0.0192348	539.2	0.00078113	-0.00729462	-0.00369012
539.4	0.83446	0.39546	0.150404	609.4	0.163963	0.074309	0.0322246	547	0.291062	0.0965859	0.0272342	539.4	0.402703	0.24342	0.084741	539.4	0.221765	0.0681763	0.01941	539.4	0.00064568	-0.00743405	-0.00365417
539.6	0.834586	0.395178	0.150295	609.6	0.163982	0.0739829	0.0319682	547.2	0.290003	0.0958247	0.0269932	539.6	0.402214	0.242894	0.0846308	539.6	0.22156	0.0680513	0.0190502	539.6	0.00118265	-0.00772147	-0.00326467
539.8	0.834636	0.395337	0.150534	609.8	0.16386	0.0741344	0.0324566	547.4	0.289787	0.0959254	0.0272082	539.8	0.402169	0.242328	0.084263	539.8	0.221421	0.0677485	0.0187723	539.8	0.00102704	-0.00750444	-0.00313403
540	0.834603	0.395366	0.150641	610	0.163953	0.074815	0.0330078	547.6	0.289905	0.0963273	0.0277404	540	0.402196	0.241978	0.0839933	540	0.221565	0.0675606	0.0186797	540	0.00057888	-0.00778567	-0.00316516
540.2	0.834327	0.395377	0.150505	610.2	0.163785	0.075032	0.0335109	547.8	0.289077	0.0960962	0.0280397	540.2	0.401761	0.241555	0.0839972	540.2	0.221122	0.0672273	0.0184584	540.2	0.00031606	-0.00801855	-0.0031577
540.4	0.8342	0.395689	0.150864	610.4	0.163615	0.0753534	0.0330787	548	0.288256	0.095619	0.0274386	540.4	0.401604	0.240883	0.0837844	540.4	0.221015	0.0665951	0.0179297	540.4	0.000538	-0.00766878	-0.00334263
540.6	0.834735	0.395876	0.151332	610.6	0.16336	0.0752172	0.0331075	548.2	0.287498	0.0953389	0.0274104	540.6	0.40139	0.240706	0.0841028	540.6	0.220509	0.0665881	0.0178753	540.6	0.00057757	-0.00778472	-0.00316467
540.8	0.83467	0.396456	0.151959	610.8	0.163254	0.0754703	0.0333598	548.4	0.286911	0.0953732	0.0274157	540.8	0.401524	0.240775	0.0842897	540.8	0.220273	0.0661776	0.0173559	540.8	0.00078851	-0.0075807	-0.00312205
541	0.834261	0.396591	0.152095	611	0.162772	0.0748499	0.0327286	548.6	0.287023	0.0960575	0.0276355	541	0.401206	0.24072	0.0843077	541	0.220018	0.0662318	0.0172573	541	0.00069208	-0.00734484	-0.00382241
541.2	0.833879	0.396554	0.151951	611.2	0.163143	0.0744828	0.0325705	548.8	0.286578	0.0952269	0.027321	541.2	0.401097	0.240772	0.0846025	541.2	0.219788	0.0664138	0.0176245	541.2	0.00089127	-0.00637784	-0.00388395
541.4	0.833231	0.39669	0.152162	611.4	0.162973	0.0740184	0.0325289	549	0.286224	0.0957265	0.0278586	541.4	0.401008	0.24097	0.0842129	541.4	0.219922	0.0663186	0.017857	541.4	0.00079935	-0.00587834	-0.00383561
541.6	0.832893	0.396548	0.152069	611.6	0.162822	0.0734297	0.0328701	549.2	0.286208	0.0965218	0.0282364	541.6	0.401022	0.241167	0.0839867	541.6	0.220055	0.0661099	0.0179339	541.6	0.00087697	-0.00592724	-0.00434034
541.8	0.832827	0.396274	0.152052	611.8	0.162955	0.0730841	0.0329285	549.4	0.285902	0.0964822	0.0277381	541.8	0.400805	0.240995	0.0841521	541.8	0.219417	0.0659857	0.0176999	541.8	0.000969	-0.0063152	-0.00496589
542	0.832266	0.395798	0.151833	612	0.162557	0.0730349	0.0329796	549.6	0.286031	0.0966159	0.0279053	542	0.400765	0.241627	0.0840836	542	0.21855	0.0660488	0.0174151	542	0.00073068	-0.00610675	-0.00551758
542.2	0.831513	0.394953	0.151253	612.2	0.162225	0.072252	0.032485	549.8	0.285289	0.0963867	0.0279341	542.2	0.399764	0.241256	0.0835128	542.2	0.217869	0.0658123	0.0172595	542.2	0.001261	-0.00616834	-0.00566936
542.4	0.830837	0.394718	0.150913	612.4	0.161939	0.0718511	0.0324191	550	0.285209	0.0967899	0.0279737	542.4	0.399805	0.241608	0.0836354	542.4	0.217292	0.0660046	0.0173649	542.4	0.0011214	-0.00580152	-0.00561634
542.6	0.830597	0.394146	0.150224	612.6	0.162034	0.0719059	0.0321697	550.2	0.285054	0.0972455	0.0282631	542.6	0.399488	0.24186	0.0842539	542.6	0.217298	0.0666148	0.0177032	542.6	0.00199891	-0.00581371	-0.00504363
542.8	0.829984	0.394035	0.150254	612.8	0.162064	0.0718175	0.0324349	550.4	0.285091	0.0969953	0.0284165	542.8	0.398929	0.242388	0.083605	542.8	0.216581	0.0661239	0.0173228	542.8	0.0020748	-0.0058648	-0.00503389
543	0.829251	0.393391	0.15015	613	0.162028	0.0719078	0.032625	550.6	0.284733	0.0972068	0.0287981	543	0.398743	0.242219	0.0835928	543	0.216193	0.0661057	0.0170682	543	0.00195535	-0.00651119	-0.00510161
543.2	0.828876	0.393437	0.14984	613.2	0.161671	0.0720915	0.0324977	550.8	0.284208	0.096521	0.0287952	543.2	0.398028	0.241641	0.0837029	543.2	0.216225	0.0661863	0.0170292	543.2	0.00197283	-0.00625022	-0.0054026
543.4	0.828518	0.393427	0.149571	613.4	0.161561	0.07178	0.0327589	551	0.283749	0.0962349	0.0283784	543.4	0.398197	0.240855	0.0830474	543.4	0.215868	0.0661493	0.0168281	543.4	0.00194036	-0.00631361	-0.00585397
543.6	0.828153	0.392813	0.148772	613.6	0.161515	0.0718499	0.0332821	551.2	0.283292	0.0964371	0.0281416	543.6	0.397414	0.239816	0.0825997	543.6	0.215812	0.0658157	0.0169864	543.6	0.00226891	-0.00652383	-0.00572482
543.8	0.82834	0.392865	0.148592	613.8	0.161466	0.0721865	0.0335403	551.4	0.283442	0.0968041	0.0285942	543.8	0.397032	0.238952	0.0826167	543.8	0.215596	0.0657551	0.0171728	543.8	0.00218225	-0.00647793	-0.00587462
544	0.828086	0.39296	0.148446	614	0.16048	0.0719508	0.0326793	551.6	0.2825	0.0967926	0.0289026	544	0.396496	0.238574	0.0823032	544	0.215951	0.0658214	0.0177613	544	0.0019788	-0.00659989	-0.00589902
544.2	0.827978	0.393079	0.148316	614.2	0.160226	0.0723611	0.0325382	551.8	0.281507	0.0964285	0.0288107	544.2	0.395709	0.238015	0.082186	544.2	0.215886	0.0657797	0.0182274	544.2	0.00182837	-0.00717872	-0.00589237
544.4	0.828125	0.393116	0.148622	614.4	0.159879	0.0723736	0.0319393	552	0.281197	0.0963689	0.0282333	544.4	0.395627	0.237731	0.0819812	544.4	0.215582	0.0656329	0.0181481	544.4	0.00209632	-0.00695665	-0.00559383
544.6	0.828303	0.392615	0.148123	614.6	0.159799	0.072363	0.0319199	552.2	0.280404	0.0965508	0.0281488	544.6	0.395744	0.237669	0.0824205	544.6	0.215398	0.0654627	0.0181267	544.6	0.00141516	-0.00708226	-0.00558876
544.8	0.827915	0.39278	0.148695	614.8	0.15968	0.0722964	0.0310699	552.4	0.280098	0.0961911	0.0278132	544.8	0.395597	0.237265	0.0823497	544.8	0.215345	0.0659162	0.0186612	544.8	0.0011109	-0.00695649	-0.00558213
545	0.82727	0.392215	0.147817	615	0.159758	0.071818	0.0307337	552.6	0.279978	0.0958734	0.0278189	545	0.395149	0.237087	0.0826454	545	0.215417	0.0661259	0.019037	545	0.00097117	-0.00667106	-0.00551131
545.2	0.827141	0.392271	0.147812	615.2	0.160767	0.0720977	0.031432	552.8	0.279857	0.0951865	0.0276595	545.2	0.394547	0.236513	0.0824947	545.2	0.215117	0.0662181	0.0194036	545.2	0.00098357	-0.00671086	-0.00532523
545.4	0.826659	0.392519	0.148203	615.4	0.160893	0.0718235	0.03184	553	0.279676	0.0955216	0.028293	545.4	0.39446	0.236525	0.0821076	545.4	0.215116	0.0659672	0.0194436	545.4	0.00098627	-0.00665181	-0.00471168
545.6	0.826539	0.392284	0.148143	615.6	0.161245	0.0719473	0.0319457	553.2	0.280302	0.0955279	0.0284128	545.6	0.394144	0.236316	0.082582	545.6	0.214728	0.0657726	0.0191625	545.6	0.00068854	-0.00727978	-0.00466001
545.8	0.826555	0.392522	0.148493	615.8	0.161884	0.0718778	0.0320163	553.4	0.280083	0.0948166	0.0279455	545.8	0.393981	0.236628	0.0835042	545.8	0.214432	0.0656749	0.0194541	545.8	0.00069982	-0.00760164	-0.00420295
546	0.825871	0.391843	0.148169	616	0.162087	0.0720044	0.0320536	553.6	0.280447	0.0947457	0.028877	546	0.393492	0.236993	0.0836327	546	0.214119	0.0654668	0.019231	546	0.00083555	-0.00757785	-0.00356855
546.2	0.825322	0.391544	0.148125	616.2	0.162127	0.0716598	0.0321015	553.8	0.280372	0.0942929	0.0287977	546.2	0.393075	0.236796	0.0835916	546.2	0.2138	0.0650398	0.0192937	546.2	0.00083745	-0.0074517	-0.00303522
546.4	0.825599	0.391943	0.148324	616.4	0.162438	0.0721168	0.0327612	554	0.280238	0.0939506	0.0295022	546.4	0.393494	0.237183	0.0839767	546.4	0.213696	0.0651294	0.0194033	546.4	0.00107884	-0.00772744	-0.00294321
546.6	0.826197	0.392241	0.14888	616.6	0.162417	0.0723077	0.0330195	554.2	0.279738	0.0937958	0.0295088	546.6	0.393057	0.236913	0.0843062	546.6	0.213612	0.06486	0.0189696	546.6	0.00132693	-0.00779054	-0.00294798
546.8	0.826056	0.392237	0.149324	616.8	0.162415	0.0718179	0.033195	554.4	0.279308	0.093329	0.0296802	546.8	0.392285	0.236484	0.0833967	546.8	0.21306	0.0647086	0.0182256	546.8	0.00155574	-0.00720655	-0.00283651
547	0.825987	0.392364	0.149367	617	0.162459	0.0715069	0.0331701	554.6	0.278554	0.093258	0.0291733	547	0.391785	0.236504	0.0834658	547	0.212981	0.065369	0.0177613	547	0.00130298	-0.00669869	-0.00276496
547.2	0.825972	0.392012	0.149071	617.2	0.161805	0.0710917	0.032553	554.8	0.278004	0.0929963	0.0290918	547.2	0.391021	0.236132	0.0829573	547.2	0.212705	0.0653201	0.0175764	547.2	0.00131505	-0.00669962	-0.00312373
547.4	0.826163	0.392215	0.149195	617.4	0.161707	0.0707487	0.0325968	555	0.277338	0.0930443	0.028393	547.4	0.390953	0.235893	0.0822771	547.4	0.212488	0.0654407	0.017003	547.4	0.00161642	-0.00656239	-0.00307078
547.6	0.826171	0.391811	0.149211	617.6	0.160929	0.0706941	0.0321311	555.2	0.276235	0.0929375	0.0281253	547.6	0.390039	0.235655	0.0817438	547.6	0.212607	0.0651842	0.0168499	547.6	0.00213911	-0.00632689	-0.00284551
547.8	0.826479	0.391831	0.149539	617.8	0.159917	0.0702278	0.0310971	555.4	0.275361	0.0924853	0.0280872	547.8	0.38977	0.235475	0.0813245	547.8	0.212188	0.0652225	0.0166993	547.8	0.00268239	-0.0059471	-0.00278787
548	0.825881	0.391395	0.149353	618	0.158852	0.0696753	0.0304611	555.6	0.274281	0.0925084	0.0274342	548	0.389203	0.235064	0.0807609	548	0.21229	0.0656772	0.017051	548	0.00296293	-0.00611265	-0.00261392
548.2	0.826057	0.390901	0.149184	618.2	0.159044	0.0707828	0.0312146	555.8	0.273585	0.0920925	0.026628	548.2	0.388997	0.234669	0.0801566	548.2	0.212068	0.0656342	0.0172975	548.2	0.00335409	-0.00606639	-0.00250928
548.4	0.825933	0.390254	0.148831	618.4	0.158524	0.070606	0.0311477	556	0.272652	0.0916121	0.0256016	548.4	0.389258	0.234253	0.0801166	548.4	0.211929	0.065322	0.016887	548.4	0.00317578	-0.00507768	-0.00223794
548.6	0.825649	0.389831	0.148681	618.6	0.158208	0.0703375	0.0307954	556.2	0.271882	0.0916376	0.0252501	548.6	0.389442	0.233811	0.0799681	548.6	0.211945	0.0646024	0.0167729	548.6	0.0029304	-0.00511336	-0.00226844
548.8	0.824869	0.389292	0.148618	618.8	0.157902	0.0706186	0.0310968	556.4	0.271852	0.0912882	0.0254054	548.8	0.389263	0.233563	0.0796717	548.8	0.211489	0.0643306	0.0169959	548.8	0.00345512	-0.00467111	-0.00202107
549	0.824489	0.388389	0.147796	619	0.158373	0.0707376	0.0314009	556.6	0.271389	0.0908898	0.0252112	549	0.389289	0.233644	0.0800082	549	0.211298	0.0641233	0.0169268	549	0.00350599	-0.00466558	-0.0023199
549.2	0.824451	0.388557	0.148091	619.2	0.158992	0.0713196	0.0322028	556.8	0.271455	0.0905995	0.0253139	549.2	0.389161	0.233211	0.0797221	549.2	0.210982	0.0640525	0.0170431	549.2	0.00340583	-0.00507259	-0.00198252
549.4	0.824045	0.388415	0.14805	619.4	0.15865	0.0713966	0.0318425	557	0.271265	0.0910788	0.0260153	549.4	0.389535	0.233758	0.0805426	549.4	0.211214	0.0635277	0.0172751	549.4	0.00345522	-0.00498693	-0.00119748
549.6	0.823625	0.388187	0.148023	619.6	0.158617	0.0712071	0.0318304	557.2	0.271452	0.0905988	0.0259861	549.6	0.389049	0.23339	0.0810694	549.6	0.211619	0.0635972	0.0177566	549.6	0.00297761	-0.00551322	-0.00125554
549.8	0.823164	0.388318	0.148261	619.8	0.15887	0.0714058	0.032568	557.4	0.270798	0.0901009	0.0261153	549.8	0.388813	0.233774	0.081527	549.8	0.211504	0.063268	0.0184987	549.8	0.00322719	-0.00590927	-0.00131507
550	0.822698	0.387917	0.148202	620	0.158921	0.0720677	0.032913	557.6	0.270559	0.0895346	0.0263642	550	0.388304	0.233522	0.0816071	550	0.21139	0.0632372	0.0186069	550	0.00317471	-0.00648729	-0.00131534
550.2	0.822664	0.388396	0.148415	620.2	0.159536	0.0725494	0.0335489	557.8	0.270031	0.0893833	0.026374	550.2	0.387572	0.23313	0.0816816	550.2	0.211119	0.0632547	0.019015	550.2	0.00310924	-0.0064044	-0.00148093
550.4	0.82307	0.388795	0.149024	620.4	0.159633	0.0728584	0.0339764	558	0.269445	0.0887878	0.0266143	550.4	0.387564	0.233205	0.0817999	550.4	0.210919	0.0633481	0.0189537	550.4	0.00375285	-0.00600131	-0.00125283
550.6	0.822792	0.388613	0.149524	620.6	0.159731	0.0728225	0.033724	558.2	0.269432	0.0895224	0.0268766	550.6	0.38718	0.233121	0.0821576	550.6	0.210475	0.0632662	0.018607	550.6	0.00334114	-0.00526347	-0.00130528
550.8	0.822404	0.389017	0.149669	620.8	0.159411	0.0721969	0.0331483	558.4	0.269544	0.0897026	0.0271822	550.8	0.386596	0.233426	0.0821632	550.8	0.210353	0.0643458	0.0185665	550.8	0.00339562	-0.00496269	-0.00111121
551	0.822213	0.389292	0.150084	621	0.1593	0.0720488	0.0326462	558.6	0.269044	0.08981	0.0269128	551	0.386489	0.234184	0.0822221	551	0.210441	0.064411	0.0183805	551	0.00287677	-0.00496824	-0.00149129
551.2	0.822001	0.389444	0.150403	621.2	0.158581	0.0721425	0.0321434	558.8	0.268382	0.0899752	0.0267865	551.2	0.386164	0.233976	0.0822012	551.2	0.210384	0.0639096	0.0186049	551.2	0.00317599	-0.00495327	-0.00165227
551.4	0.822048	0.389876	0.150727	621.4	0.158754	0.0723944	0.0324349	559	0.268057	0.0898418	0.0261953	551.4	0.385883	0.233868	0.0819736	551.4	0.210045	0.0639372	0.0181787	551.4	0.00401563	-0.00407827	-0.00121021
551.6	0.821841	0.3896	0.150683	621.6	0.158099	0.0722152	0.0320724	559.2	0.26748	0.0895212	0.0263418	551.6	0.385258	0.233551	0.0818896	551.6	0.209264	0.063105	0.0175486	551.6	0.00433875	-0.0039261	-0.00157051
551.8	0.821514	0.389917	0.150754	621.8	0.157906	0.0718654	0.0316374	559.4	0.267723	0.0894151	0.0262726	551.8	0.385042	0.23325	0.081757	551.8	0.208716	0.0630071	0.017617	551.8	0.00413531	-0.00409274	-0.00167868
552	0.821061	0.389563	0.150149	622	0.157581	0.0717899	0.0312838	559.6	0.267385	0.0894659	0.0257546	552	0.384586	0.232887	0.0814207	552	0.208519	0.0631808	0.0172326	552	0.00412042	-0.00434727	-0.00184778
552.2	0.821203	0.389361	0.150012	622.2	0.1578	0.0724171	0.0320069	559.8	0.266826	0.0893227	0.0256303	552.2	0.384637	0.232732	0.0815418	552.2	0.208523	0.0629021	0.0172568	552.2	0.00391073	-0.00419359	-0.00217273
552.4	0.820863	0.389526	0.14953	622.4	0.15737	0.0716694	0.0314165	560	0.265887	0.0891168	0.0253749	552.4	0.384413	0.232624	0.0813653	552.4	0.208177	0.0621739	0.0166936	552.4	0.00371479	-0.00365584	-0.0022808
552.6	0.820393	0.389172	0.149296	622.6	0.15729	0.071647	0.0313847	560.2	0.265507	0.0891902	0.0255236	552.6	0.383708	0.232639	0.0804401	552.6	0.20779	0.0621505	0.0170426	552.6	0.00347388	-0.00436396	-0.00264202
552.8	0.820092	0.388618	0.148686	622.8	0.157826	0.0719664	0.0314682	560.4	0.265233	0.0890935	0.0259667	552.8	0.383563	0.232468	0.0805402	552.8	0.207237	0.0621008	0.016374	552.8	0.00307175	-0.00427969	-0.00285877
553	0.819941	0.388136	0.148698	623	0.158342	0.072092	0.0316534	560.6	0.264229	0.0888898	0.0252744	553	0.383114	0.232102	0.0806038	553	0.207231	0.0622789	0.0164609	553	0.00254837	-0.00471973	-0.0033392
553.2	0.819636	0.388439	0.148858	623.2	0.158455	0.0728135	0.0321972	560.8	0.264106	0.088984	0.0254274	553.2	0.382696	0.232103	0.0805259	553.2	0.206906	0.0621883	0.016624	553.2	0.00273423	-0.00507865	-0.003073
553.4	0.818979	0.387978	0.148603	623.4	0.158552	0.0729467	0.0323377	561	0.263807	0.0892296	0.0254203	553.4	0.382236	0.23193	0.0799835	553.4	0.206437	0.0618751	0.0167557	553.4	0.00253808	-0.00552459	-0.00321166
553.6	0.818264	0.387782	0.148308	623.6	0.158392	0.0727169	0.0324385	561.2	0.263252	0.0880289	0.0247013	553.6	0.381493	0.231562	0.0798228	553.6	0.206239	0.0619113	0.0167801	553.6	0.00231739	-0.00603253	-0.00348665
553.8	0.817639	0.387468	0.148242	623.8	0.158974	0.0732091	0.0331207	561.4	0.262546	0.0873015	0.0246586	553.8	0.381243	0.231734	0.0797903	553.8	0.205443	0.0615653	0.0165705	553.8	0.0024371	-0.00628399	-0.00369765
554	0.817176	0.386859	0.147949	624	0.159476	0.0736724	0.033647	561.6	0.262091	0.0865825	0.0245768	554	0.381009	0.231273	0.0797802	554	0.204947	0.0616439	0.0167894	554	0.00233902	-0.00673183	-0.00391323
554.2	0.816843	0.386479	0.147716	624.2	0.159911	0.0736455	0.0337699	561.8	0.261495	0.0864761	0.0240837	554.2	0.380942	0.230886	0.0800326	554.2	0.20468	0.0619222	0.0170033	554.2	0.00249059	-0.00649575	-0.00353067
554.4	0.816399	0.386082	0.147738	624.4	0.159709	0.0730192	0.0337455	562	0.261354	0.0858778	0.0240828	554.4	0.381629	0.231207	0.0799781	554.4	0.204471	0.0622819	0.0170268	554.4	0.001919	-0.0064864	-0.00369974
554.6	0.815945	0.385873	0.147408	624.6	0.159301	0.0722094	0.0331306	562.2	0.260852	0.0861337	0.0239931	554.6	0.381726	0.231165	0.0801972	554.6	0.204379	0.0621088	0.0170377	554.6	0.00128304	-0.00714617	-0.00393193
554.8	0.815526	0.385532	0.146926	624.8	0.158986	0.0718917	0.0331255	562.4	0.260249	0.0853268	0.0233043	554.8	0.381982	0.231732	0.0804114	554.8	0.204401	0.0627829	0.0173055	554.8	0.00131494	-0.00738594	-0.00375301
555	0.815295	0.385164	0.146543	625	0.159143	0.0721332	0.0331934	562.6	0.259664	0.085327	0.0233116	555	0.382373	0.231711	0.0802831	555	0.204315	0.0624742	0.0173139	555	0.00141368	-0.00724914	-0.00399258
555.2	0.814897	0.385028	0.146407	625.2	0.158878	0.0718402	0.0328907	562.8	0.258844	0.084823	0.0230613	555.2	0.382667	0.231389	0.0804412	555.2	0.20374	0.0618444	0.0174347	555.2	0.00196224	-0.00693873	-0.00380235
555.4	0.814816	0.384956	0.145921	625.4	0.158772	0.0717033	0.0325375	563	0.25824	0.0843596	0.0229656	555.4	0.382765	0.231065	0.0805046	555.4	0.203603	0.0620096	0.0173384	555.4	0.00251617	-0.00642029	-0.00319096
555.6	0.814346	0.384397	0.145291	625.6	0.158533	0.0712568	0.0320102	563.2	0.258424	0.0842486	0.0237634	555.6	0.382558	0.230624	0.0805747	555.6	0.203544	0.0615741	0.0173609	555.6	0.00230508	-0.00612424	-0.00333524
555.8	0.813936	0.383916	0.14454	625.8	0.158113	0.0705611	0.0312057	563.4	0.258445	0.0838897	0.0235788	555.8	0.382356	0.230335	0.0803816	555.8	0.203288	0.061351	0.0172994	555.8	0.00194601	-0.00608762	-0.00328679
556	0.813658	0.383487	0.143864	626	0.157797	0.0702818	0.0312199	563.6	0.257725	0.0843532	0.0240452	556	0.38192	0.230159	0.0803089	556	0.203167	0.0610985	0.0168274	556	0.00223805	-0.00605348	-0.0030311
556.2	0.813979	0.383836	0.144524	626.2	0.158148	0.0709323	0.0319552	563.8	0.257326	0.0845728	0.0242162	556.2	0.381903	0.230309	0.0808229	556.2	0.202942	0.061078	0.017595	556.2	0.00133173	-0.00611364	-0.0033134
556.4	0.814057	0.384062	0.144465	626.4	0.157727	0.0709628	0.0316521	564	0.256592	0.0844555	0.0238648	556.4	0.381214	0.230108	0.0804324	556.4	0.20287	0.0610971	0.0177511	556.4	0.0015353	-0.00502676	-0.00276576
556.6	0.814539	0.384187	0.14501	626.6	0.157899	0.0711465	0.0313646	564.2	0.256549	0.0846529	0.0238964	556.6	0.380746	0.230002	0.0801771	556.6	0.20282	0.061803	0.0182776	556.6	0.00105824	-0.00535727	-0.00272427
556.8	0.814791	0.384261	0.14558	626.8	0.158136	0.0712745	0.0313862	564.4	0.256332	0.0847953	0.024054	556.8	0.38087	0.229312	0.0805815	556.8	0.202956	0.0614764	0.0178231	556.8	0.0007955	-0.00477608	-0.00259992
557	0.814886	0.384188	0.146302	627	0.15801	0.0720587	0.0315156	564.6	0.255972	0.085185	0.0237413	557	0.380011	0.228938	0.0801695	557	0.202612	0.0614597	0.0183262	557	0.00100784	-0.00457281	-0.00228343
557.2	0.814716	0.384347	0.146791	627.2	0.158215	0.0729403	0.0318442	564.8	0.256335	0.0852969	0.0240615	557.2	0.379232	0.228691	0.0796861	557.2	0.202198	0.0609109	0.0180117	557.2	0.00116626	-0.00446337	-0.00198557
557.4	0.814779	0.384244	0.146992	627.4	0.158366	0.0729093	0.0316643	565	0.256115	0.0849794	0.0239729	557.4	0.378274	0.228473	0.0787137	557.4	0.201808	0.0602953	0.017549	557.4	0.00144186	-0.00463377	-0.00175636
557.6	0.814589	0.3845	0.147201	627.6	0.158482	0.0727971	0.0310683	565.2	0.256212	0.084719	0.0238473	557.6	0.377559	0.228368	0.0790898	557.6	0.201763	0.0600382	0.0173564	557.6	0.00165348	-0.00469338	-0.00138984
557.8	0.814694	0.384375	0.147454	627.8	0.158538	0.072858	0.031277	565.4	0.256567	0.0846697	0.0243875	557.8	0.37737	0.228341	0.079079	557.8	0.201141	0.0598493	0.0173853	557.8	0.00163629	-0.0050243	-0.00195154
558	0.814352	0.384146	0.147378	628	0.15816	0.0730367	0.0313056	565.6	0.256322	0.0848796	0.0242057	558	0.377303	0.228366	0.0790848	558	0.200845	0.0600974	0.0174203	558	0.00146934	-0.00549712	-0.00199383
558.2	0.814132	0.384594	0.147379	628.2	0.157591	0.0721914	0.0305856	565.8	0.255713	0.0847102	0.0235447	558.2	0.377471	0.228964	0.0794317	558.2	0.200713	0.0606492	0.0171992	558.2	0.00191245	-0.00533758	-0.00161318
558.4	0.813534	0.38399	0.147137	628.4	0.157386	0.071728	0.0305298	566	0.256241	0.0848481	0.023959	558.4	0.377238	0.228538	0.0787326	558.4	0.200085	0.0605432	0.0166987	558.4	0.00165001	-0.00531902	-0.00180979
558.6	0.813381	0.383686	0.146618	628.6	0.157171	0.071976	0.0304056	566.2	0.256193	0.0855024	0.0238548	558.6	0.376788	0.228507	0.0788035	558.6	0.200352	0.0604987	0.0166107	558.6	0.00223188	-0.00562742	-0.00179395
558.8	0.812901	0.383443	0.1464	628.8	0.156835	0.0720423	0.0306099	566.4	0.256225	0.0853022	0.0240236	558.8	0.376944	0.228864	0.078875	558.8	0.199611	0.0610345	0.016449	558.8	0.00269011	-0.00550028	-0.00184047
559	0.812583	0.383814	0.146262	629	0.156579	0.0718666	0.0304501	566.6	0.256227	0.0858595	0.0244507	559	0.37658	0.228252	0.0788944	559	0.199662	0.0610207	0.0164064	559	0.00287061	-0.0051522	-0.00235896
559.2	0.811919	0.383832	0.146497	629.2	0.156334	0.0713743	0.0303242	566.8	0.255704	0.0855251	0.0242849	559.2	0.376344	0.22829	0.0789918	559.2	0.198887	0.0608073	0.0169679	559.2	0.00328726	-0.00522365	-0.00218903
559.4	0.811362	0.383494	0.146095	629.4	0.156231	0.0715434	0.0305924	567	0.256005	0.0861214	0.0249199	559.4	0.375898	0.227921	0.0789187	559.4	0.198488	0.0613937	0.0166328	559.4	0.00311881	-0.00550726	-0.00223823
559.6	0.811033	0.383427	0.146098	629.6	0.15643	0.071219	0.0308436	567.2	0.256567	0.0862862	0.0254165	559.6	0.375414	0.227756	0.078948	559.6	0.197873	0.0612017	0.0163439	559.6	0.00309546	-0.00543353	-0.00250854
559.8	0.810623	0.383219	0.146021	629.8	0.156434	0.0712266	0.0314631	567.4	0.255925	0.0863306	0.0250498	559.8	0.375548	0.227977	0.0792937	559.8	0.197205	0.0606669	0.0154222	559.8	0.00332527	-0.00554178	-0.00290268
560	0.810591	0.383616	0.146567	630	0.156262	0.0715196	0.0325717	567.6	0.255244	0.0865093	0.0254166	560	0.375281	0.228324	0.0793611	560	0.197274	0.0611398	0.0157095	560	0.0035226	-0.00568746	-0.00320332
560.2	0.810456	0.383801	0.146857	630.2	0.156416	0.0720117	0.0328385	567.8	0.254784	0.0862893	0.0252695	560.2	0.375626	0.228745	0.0797397	560.2	0.196818	0.0612681	0.0163304	560.2	0.00315882	-0.0056136	-0.00358781
560.4	0.80978	0.383276	0.146776	630.4	0.156256	0.0717144	0.0330757	568	0.254357	0.0858976	0.0251907	560.4	0.375916	0.228911	0.0797888	560.4	0.197093	0.0621006	0.0167021	560.4	0.00343709	-0.00506877	-0.00356094
560.6	0.809272	0.382866	0.146539	630.6	0.156416	0.071382	0.0328897	568.2	0.253288	0.0855871	0.0249649	560.6	0.376203	0.22873	0.0795281	560.6	0.19713	0.0624099	0.0168542	560.6	0.00302841	-0.00535873	-0.00380109
560.8	0.808849	0.382846	0.146483	630.8	0.156271	0.071586	0.0328236	568.4	0.252528	0.0850653	0.0251467	560.8	0.375802	0.228573	0.0794333	560.8	0.197343	0.0619696	0.0167519	560.8	0.00295614	-0.00519086	-0.00395947
561	0.808811	0.383179	0.1464	631	0.156196	0.0717744	0.0325808	568.6	0.251842	0.0846145	0.0250174	561	0.374888	0.228286	0.0788113	561	0.197267	0.0612087	0.0164241	561	0.00286417	-0.00563427	-0.00391304
561.2	0.808061	0.383574	0.146338	631.2	0.155968	0.0714012	0.0324024	568.8	0.251664	0.0845393	0.0252791	561.2	0.375116	0.228946	0.0791492	561.2	0.197513	0.0605001	0.0158383	561.2	0.00328174	-0.00573043	-0.0035308
561.4	0.807992	0.383701	0.146114	631.4	0.156018	0.0709666	0.0314838	569	0.250962	0.0839541	0.0247575	561.4	0.374794	0.229137	0.0796329	561.4	0.197557	0.0605502	0.015703	561.4	0.00340886	-0.00578233	-0.00387379
561.6	0.807459	0.383358	0.145403	631.6	0.1562	0.0713572	0.0315099	569.2	0.250391	0.0838725	0.0244687	561.6	0.374619	0.228376	0.0798836	561.6	0.197484	0.0607073	0.0158495	561.6	0.00318317	-0.00593867	-0.00423734
561.8	0.807455	0.383262	0.14519	631.8	0.155622	0.0711792	0.031356	569.4	0.249564	0.0831595	0.0243818	561.8	0.374515	0.228253	0.0797957	561.8	0.197268	0.0604874	0.0160403	561.8	0.00265097	-0.00602933	-0.0049846
562	0.806777	0.382909	0.144742	632	0.15531	0.070976	0.0312516	569.6	0.248635	0.0830506	0.0237887	562	0.374698	0.227932	0.0797183	562	0.196945	0.0597665	0.0155737	562	0.00254839	-0.00556732	-0.00420769
562.2	0.80666	0.382915	0.144479	632.2	0.155025	0.0704342	0.0308415	569.8	0.248365	0.0826554	0.023813	562.2	0.373926	0.227063	0.0791627	562.2	0.196699	0.0595979	0.0156214	562.2	0.00241715	-0.00555843	-0.0042593
562.4	0.806402	0.382132	0.143793	632.4	0.154942	0.070752	0.0312037	570	0.248676	0.0831206	0.0241304	562.4	0.372988	0.225764	0.0785968	562.4	0.196522	0.0595839	0.0156991	562.4	0.00188631	-0.00519753	-0.00428719
562.6	0.80582	0.381979	0.143163	632.6	0.154896	0.0708072	0.0308548	570.2	0.248644	0.0834607	0.0239692	562.6	0.372564	0.225625	0.0787941	562.6	0.196966	0.0595101	0.0162565	562.6	0.00215297	-0.00543815	-0.00385579
562.8	0.805813	0.381908	0.143483	632.8	0.154806	0.0706079	0.0307724	570.4	0.248616	0.0837052	0.0243695	562.8	0.371933	0.2246	0.0783398	562.8	0.196491	0.0598277	0.0164825	562.8	0.00156467	-0.00614072	-0.00399065
563	0.805544	0.38165	0.143682	633	0.154912	0.0709683	0.0309273	570.6	0.248584	0.0841191	0.0246812	563	0.371121	0.223834	0.078347	563	0.196609	0.0599655	0.0169245	563	0.00107882	-0.00601914	-0.00414522
563.2	0.805417	0.381517	0.143766	633.2	0.155176	0.0712834	0.0312218	570.8	0.248093	0.0840545	0.0246054	563.2	0.370748	0.223944	0.0784936	563.2	0.195553	0.0597438	0.0169061	563.2	0.00100301	-0.00651713	-0.00370692
563.4	0.805091	0.381237	0.143679	633.4	0.155143	0.0712556	0.0311694	571	0.247759	0.0842414	0.0245269	563.4	0.370299	0.223716	0.0780805	563.4	0.195169	0.0601203	0.0164993	563.4	0.00076224	-0.00667318	-0.00403208
563.6	0.804358	0.381036	0.14332	633.6	0.155031	0.071246	0.0310077	571.2	0.247134	0.0840772	0.0239511	563.6	0.370012	0.224164	0.0784079	563.6	0.19477	0.06	0.0167942	563.6	0.00104839	-0.00623953	-0.00372477
563.8	0.803951	0.380802	0.143047	633.8	0.154581	0.0711347	0.0312017	571.4	0.246392	0.0839262	0.0235674	563.8	0.36967	0.224766	0.0786543	563.8	0.19442	0.0597416	0.0167904	563.8	0.0017357	-0.00592833	-0.00406342
564	0.803822	0.380499	0.143134	634	0.154793	0.0716207	0.0319253	571.6	0.245874	0.0834559	0.0235194	564	0.369084	0.224833	0.0784435	564	0.19393	0.0600446	0.0172045	564	0.00185526	-0.00596281	-0.00419931
564.2	0.802962	0.380168	0.14273	634.2	0.154854	0.0712449	0.0321597	571.8	0.24568	0.0829594	0.0234482	564.2	0.369714	0.225436	0.0786307	564.2	0.193987	0.060224	0.0173816	564.2	0.00182474	-0.00574255	-0.00407632
564.4	0.802562	0.379967	0.142917	634.4	0.154545	0.0712886	0.0323821	572	0.245351	0.0823176	0.0231333	564.4	0.369833	0.225324	0.0783452	564.4	0.194169	0.0605169	0.0176575	564.4	0.00213282	-0.00560174	-0.00365153
564.6	0.802652	0.380087	0.142933	634.6	0.154654	0.0710134	0.0323592	572.2	0.244431	0.081969	0.0228212	564.6	0.369276	0.225561	0.0779204	564.6	0.194671	0.0606647	0.0176345	564.6	0.00206693	-0.00585555	-0.00373293
564.8	0.803101	0.380879	0.143365	634.8	0.154733	0.0712807	0.0324779	572.4	0.244504	0.0816607	0.0236711	564.8	0.369126	0.226042	0.0779356	564.8	0.194713	0.0603616	0.0175724	564.8	0.00186907	-0.00610449	-0.00383974
565	0.803442	0.38116	0.143515	635	0.154673	0.0713692	0.0323595	572.6	0.243971	0.0809658	0.0230498	565	0.36917	0.225853	0.0780042	565	0.19523	0.0603246	0.0175757	565	0.00211014	-0.00628033	-0.00375146
565.2	0.803342	0.381301	0.143471	635.2	0.154207	0.070971	0.0321217	572.8	0.243616	0.0808772	0.0229566	565.2	0.369673	0.22663	0.0790047	565.2	0.19527	0.0601127	0.0171758	565.2	0.00223772	-0.00640037	-0.00414249
565.4	0.803695	0.381159	0.143493	635.4	0.154664	0.0709024	0.0326066	573	0.24314	0.0800388	0.0224756	565.4	0.369115	0.225708	0.078586	565.4	0.194855	0.0597146	0.0169366	565.4	0.00140992	-0.0066569	-0.00531398
565.6	0.803785	0.380926	0.14344	635.6	0.154856	0.0713526	0.0328642	573.2	0.242566	0.0798386	0.022919	565.6	0.369167	0.225149	0.0783728	565.6	0.19456	0.0595189	0.0165563	565.6	0.00134216	-0.00684965	-0.00551004
565.8	0.80424	0.381472	0.14412	635.8	0.15459	0.0706649	0.0324967	573.4	0.242822	0.0794401	0.0233047	565.8	0.369067	0.225378	0.0782027	565.8	0.19409	0.0590729	0.0159925	565.8	0.00073388	-0.00733287	-0.00570834
566	0.804411	0.381383	0.144507	636	0.154912	0.070613	0.0326817	573.6	0.242924	0.0792669	0.0234715	566	0.368847	0.224828	0.078135	566	0.193883	0.057964	0.0155245	566	0.00117218	-0.00733891	-0.00535468
566.2	0.805013	0.381242	0.144837	636.2	0.155148	0.0705038	0.0326028	573.8	0.243061	0.0789943	0.0233643	566.2	0.36869	0.224384	0.0779498	566.2	0.193997	0.0584068	0.0153979	566.2	0.00126358	-0.00745143	-0.00514181
566.4	0.80476	0.380329	0.144704	636.4	0.15506	0.0702111	0.0326209	574	0.243042	0.0790692	0.0236636	566.4	0.368693	0.224281	0.078058	566.4	0.193646	0.0584261	0.0153518	566.4	0.00193715	-0.00653942	-0.00445226
566.6	0.804727	0.380304	0.14545	636.6	0.155412	0.0703588	0.0322036	574.2	0.242619	0.0784944	0.0233717	566.6	0.368395	0.224386	0.0788413	566.6	0.193422	0.057905	0.0152784	566.6	0.00210003	-0.00644919	-0.00433222
566.8	0.804801	0.379881	0.146133	636.8	0.155622	0.07061	0.032287	574.4	0.242649	0.0784427	0.0235947	566.8	0.367826	0.223734	0.0786626	566.8	0.192852	0.0573625	0.0150593	566.8	0.00192234	-0.00645277	-0.00436691
567	0.804361	0.379369	0.146075	637	0.155139	0.070761	0.032019	574.6	0.242823	0.0787162	0.0234487	567	0.367132	0.223558	0.0788673	567	0.192101	0.0567086	0.0150278	567	0.00157182	-0.00564145	-0.00419299
567.2	0.803808	0.379695	0.145968	637.2	0.154683	0.0703844	0.0312603	574.8	0.242213	0.078703	0.0227649	567.2	0.366821	0.223558	0.0790071	567.2	0.191568	0.0565349	0.01483	567.2	0.00154866	-0.00505717	-0.00399324
567.4	0.803251	0.379184	0.145692	637.4	0.154298	0.0701414	0.0307091	575	0.241779	0.0791001	0.0226425	567.4	0.366662	0.223792	0.078525	567.4	0.190958	0.0565246	0.0150949	567.4	0.00143577	-0.00484853	-0.00431586
567.6	0.802229	0.378868	0.145122	637.6	0.153892	0.070061	0.0301067	575.2	0.240986	0.078884	0.0220598	567.6	0.366336	0.223879	0.0786237	567.6	0.190388	0.0562584	0.0152811	567.6	0.00160397	-0.00437112	-0.0037734
567.8	0.80203	0.378751	0.144963	637.8	0.153501	0.0700081	0.0299474	575.4	0.240379	0.0787261	0.0219071	567.8	0.365473	0.223128	0.0779936	567.8	0.19051	0.0561689	0.015485	567.8	0.00227319	-0.00378275	-0.00350379
568	0.80181	0.378526	0.145151	638	0.15385	0.070406	0.0305305	575.6	0.240192	0.0786104	0.0217247	568	0.365393	0.222687	0.0776113	568	0.19048	0.0568433	0.0162777	568	0.00212764	-0.00344348	-0.0033071
568.2	0.801365	0.378694	0.14482	638.2	0.1538	0.0701655	0.0304309	575.8	0.239846	0.0783284	0.0216091	568.2	0.365545	0.222888	0.0773552	568.2	0.191232	0.0574139	0.0166699	568.2	0.00202989	-0.00334568	-0.00304559
568.4	0.801131	0.379043	0.145166	638.4	0.154107	0.0707525	0.0300215	576	0.239903	0.0785108	0.0213216	568.4	0.365052	0.222523	0.0767485	568.4	0.191057	0.0577775	0.0170967	568.4	0.00221812	-0.00368198	-0.00277889
568.6	0.80117	0.379063	0.145162	638.6	0.153978	0.0708396	0.029883	576.2	0.239355	0.0789758	0.021722	568.6	0.364585	0.222669	0.0766442	568.6	0.19167	0.0586112	0.0174597	568.6	0.0017066	-0.00408479	-0.00271895
568.8	0.801029	0.37916	0.144977	638.8	0.153989	0.0705198	0.0300776	576.4	0.239008	0.0790113	0.0219854	568.8	0.364069	0.222176	0.0765124	568.8	0.191951	0.0588629	0.0178091	568.8	0.00093112	-0.00470058	-0.00321304
569	0.801108	0.379065	0.144866	639	0.153596	0.0701421	0.0300172	576.6	0.238549	0.0786955	0.021729	569	0.363699	0.221995	0.076523	569	0.192203	0.059478	0.0179759	569	0.00082937	-0.00517365	-0.00329406
569.2	0.800967	0.379215	0.144538	639.2	0.153093	0.069378	0.0299054	576.8	0.238294	0.0787931	0.0221069	569.2	0.363587	0.222159	0.0767576	569.2	0.192271	0.0593769	0.0176932	569.2	0.00044889	-0.00584148	-0.00361215
569.4	0.800328	0.37907	0.144572	639.4	0.153149	0.0692684	0.030483	577	0.238217	0.078653	0.0227381	569.4	0.363202	0.221912	0.0760681	569.4	0.191807	0.0593085	0.0172665	569.4	0.00058172	-0.0064222	-0.00377286
569.6	0.800155	0.379125	0.144566	639.6	0.153272	0.0697117	0.0304979	577.2	0.237964	0.0786366	0.0232905	569.6	0.36312	0.221896	0.0763237	569.6	0.191613	0.0594254	0.0165391	569.6	0.00076502	-0.00702128	-0.00411599
569.8	0.800154	0.378723	0.144208	639.8	0.153912	0.0692301	0.0306724	577.4	0.238304	0.0783609	0.0230892	569.8	0.363245	0.222386	0.0768194	569.8	0.191289	0.0588187	0.0158231	569.8	0.00109731	-0.00724834	-0.00397476
570	0.800236	0.3784	0.144398	640	0.15442	0.0692048	0.0310326	577.6	0.237766	0.0779872	0.0228345	570	0.363942	0.222439	0.0771217	570	0.191321	0.0579495	0.0157171	570	0.00197355	-0.006171	-0.00341954
570.2	0.800212	0.377921	0.144568	640.2	0.154115	0.0689242	0.030998	577.8	0.237208	0.0777312	0.0223487	570.2	0.364093	0.222778	0.0770745	570.2	0.190741	0.0581036	0.0150298	570.2	0.00221114	-0.00578357	-0.00290492
570.4	0.799463	0.377388	0.144577	640.4	0.153925	0.0686753	0.0308012	578	0.236761	0.077231	0.0223307	570.4	0.36372	0.222792	0.0773913	570.4	0.190117	0.0578912	0.0152953	570.4	0.0023624	-0.00502371	-0.00299085
570.6	0.799464	0.377692	0.14496	640.6	0.154142	0.0692096	0.0308411	578.2	0.236007	0.0766508	0.0216978	570.6	0.363226	0.222695	0.0778077	570.6	0.189605	0.0567081	0.0145944	570.6	0.00142434	-0.00512063	-0.00360325
570.8	0.79886	0.377242	0.144485	640.8	0.153988	0.069173	0.0312078	578.4	0.235971	0.076735	0.0214519	570.8	0.363111	0.222471	0.07768	570.8	0.188453	0.0552648	0.0137908	570.8	0.00140596	-0.0052321	-0.00396711
571	0.798878	0.377453	0.144346	641	0.153947	0.0692756	0.0311726	578.6	0.235662	0.0769403	0.0216531	571	0.362785	0.222463	0.0776338	571	0.187864	0.0551591	0.0139289	571	0.00139141	-0.00492007	-0.00411519
571.2	0.798668	0.377727	0.144375	641.2	0.154386	0.0693651	0.0311517	578.8	0.234934	0.0767	0.0214011	571.2	0.362912	0.22232	0.0773599	571.2	0.187627	0.0549006	0.0138024	571.2	0.00166607	-0.00456601	-0.00410738
571.4	0.798645	0.377479	0.143836	641.4	0.154741	0.0698561	0.032002	579	0.234339	0.0767373	0.0214828	571.4	0.363227	0.222362	0.0769839	571.4	0.187108	0.0546995	0.0138521	571.4	0.00200065	-0.00453816	-0.00416907
571.6	0.798189	0.377521	0.143695	641.6	0.154785	0.0697908	0.0316726	579.2	0.233542	0.0764607	0.0208837	571.6	0.363164	0.221984	0.0768501	571.6	0.186484	0.0547724	0.0140592	571.6	0.00166761	-0.00435818	-0.00400319
571.8	0.798344	0.377545	0.143951	641.8	0.154766	0.0700207	0.0321774	579.4	0.233385	0.0768758	0.0212449	571.8	0.362757	0.221374	0.0763648	571.8	0.186548	0.0546524	0.0140686	571.8	0.00167254	-0.0043668	-0.00376603
572	0.798365	0.377278	0.143999	642	0.154848	0.0697211	0.0324867	579.6	0.233344	0.0766402	0.0213875	572	0.362798	0.221538	0.0766537	572	0.185911	0.0547799	0.0144741	572	0.00154465	-0.00435161	-0.00373306
572.2	0.797979	0.377138	0.143386	642.2	0.154792	0.0701431	0.0324465	579.8	0.232992	0.0764538	0.0214125	572.2	0.362573	0.22176	0.0765735	572.2	0.185826	0.0548779	0.0146124	572.2	0.0019131	-0.00434556	-0.00323608
572.4	0.797837	0.377478	0.143455	642.4	0.15442	0.0703221	0.0318649	580	0.233124	0.076864	0.0216715	572.4	0.36228	0.221615	0.0763139	572.4	0.18545	0.0549402	0.0150115	572.4	0.00189698	-0.00469052	-0.00254106
572.6	0.797685	0.377255	0.14327	642.6	0.153764	0.0697608	0.0319171	580.2	0.23251	0.076927	0.0223514	572.6	0.361811	0.221209	0.0764627	572.6	0.185888	0.0552931	0.0157423	572.6	0.00118765	-0.00499648	-0.00234247
572.8	0.797486	0.377097	0.143163	642.8	0.153862	0.0695337	0.0324902	580.4	0.232107	0.0765429	0.0225842	572.8	0.361487	0.221142	0.0763456	572.8	0.186073	0.0559744	0.0163687	572.8	0.00066959	-0.00557166	-0.00269307
573	0.797346	0.377324	0.143262	643	0.154089	0.070181	0.0329361	580.6	0.232335	0.0764353	0.023671	573	0.361322	0.221199	0.0762091	573	0.186038	0.0565108	0.0174838	573	0.00109915	-0.00575489	-0.00250803
573.2	0.796616	0.377033	0.142997	643.2	0.153549	0.0700314	0.0327859	580.8	0.232358	0.076513	0.0235607	573.2	0.361755	0.221466	0.0765753	573.2	0.18598	0.0560406	0.0178888	573.2	0.00136546	-0.00585612	-0.00273648
573.4	0.796045	0.376267	0.142936	643.4	0.153326	0.0698384	0.0330494	581	0.232781	0.0771372	0.0242208	573.4	0.361107	0.221148	0.0766142	573.4	0.185542	0.055511	0.017675	573.4	0.00129822	-0.00627734	-0.00310128
573.6	0.796296	0.375736	0.142475	643.6	0.153439	0.0698928	0.0328729	581.2	0.233123	0.0772278	0.0249477	573.6	0.361057	0.220898	0.0771679	573.6	0.185143	0.055558	0.0180174	573.6	0.00035719	-0.00666623	-0.0036691
573.8	0.796028	0.375068	0.141795	643.8	0.153482	0.069788	0.0324308	581.4	0.233278	0.077213	0.024698	573.8	0.361002	0.221306	0.0777993	573.8	0.185806	0.0555036	0.0183448	573.8	0.00017317	-0.00601555	-0.00330213
574	0.795943	0.37534	0.142251	644	0.152853	0.0697991	0.032326	581.6	0.232895	0.0772414	0.024723	574	0.360912	0.221324	0.077685	574	0.185533	0.0554867	0.0185484	574	0.0002349	-0.00591103	-0.00333386
574.2	0.795983	0.375264	0.142573	644.2	0.152447	0.0696082	0.0321581	581.8	0.232405	0.0768474	0.0242526	574.2	0.360333	0.2213	0.0774837	574.2	0.185572	0.0558975	0.0186454	574.2	0.00074366	-0.00561357	-0.00352856
574.4	0.795533	0.375359	0.142549	644.4	0.152507	0.0695671	0.0320204	582	0.231933	0.0767277	0.0247281	574.4	0.359521	0.220758	0.0776986	574.4	0.185625	0.0557053	0.0188806	574.4	0.00042006	-0.00571484	-0.00405706
574.6	0.795431	0.37505	0.142287	644.6	0.152926	0.0699768	0.0325079	582.2	0.231128	0.0763459	0.0244113	574.6	0.358985	0.220871	0.0782393	574.6	0.185236	0.0548445	0.0177129	574.6	0.00032121	-0.0057767	-0.00472881
574.8	0.795164	0.375052	0.141851	644.8	0.152325	0.069898	0.0322556	582.4	0.230339	0.0762677	0.0241854	574.8	0.359143	0.221417	0.078864	574.8	0.184723	0.0553532	0.0173184	574.8	0.0011997	-0.00572424	-0.00499445
575	0.794892	0.375154	0.141643	645	0.152637	0.0702023	0.0323719	582.6	0.229537	0.0762229	0.0238301	575	0.358979	0.221194	0.0787554	575	0.184787	0.0554654	0.0174471	575	0.00128796	-0.00580955	-0.00520195
575.2	0.794385	0.374716	0.141252	645.2	0.152549	0.0702968	0.0327075	582.8	0.228898	0.075924	0.0231487	575.2	0.358734	0.220818	0.0786261	575.2	0.184882	0.0557917	0.0172281	575.2	0.00167802	-0.00541984	-0.00527584
575.4	0.793973	0.374529	0.140737	645.4	0.151611	0.0697421	0.032476	583	0.227872	0.0757192	0.022462	575.4	0.358044	0.220504	0.0783317	575.4	0.184875	0.0563481	0.0173016	575.4	0.00191411	-0.0049182	-0.00553572
575.6	0.793129	0.374148	0.140555	645.6	0.150958	0.0693782	0.031965	583.2	0.227027	0.0755069	0.0217084	575.6	0.357427	0.219909	0.0777864	575.6	0.184309	0.0561034	0.016812	575.6	0.00156824	-0.00504135	-0.00553036
575.8	0.792903	0.374209	0.140304	645.8	0.150706	0.0690412	0.032455	583.4	0.226666	0.0755931	0.0220802	575.8	0.356662	0.219456	0.0770548	575.8	0.18409	0.0556544	0.0164472	575.8	0.00211164	-0.0048409	-0.00487122
576	0.792424	0.373926	0.139631	646	0.150565	0.0687043	0.0318003	583.6	0.226015	0.0752339	0.0217951	576	0.356363	0.219233	0.0767956	576	0.183437	0.0557361	0.0166548	576	0.00224034	-0.00460411	-0.00458256
576.2	0.79223	0.373838	0.139324	646.2	0.150423	0.0689907	0.0313924	583.8	0.225494	0.0752267	0.0216865	576.2	0.356326	0.219111	0.0763848	576.2	0.183385	0.0557628	0.0166123	576.2	0.00231475	-0.00435657	-0.00416396
576.4	0.792018	0.373929	0.13923	646.4	0.150685	0.0685784	0.030925	584	0.225185	0.0748823	0.0215343	576.4	0.356619	0.218774	0.076264	576.4	0.183014	0.0557946	0.0164534	576.4	0.0020468	-0.00505914	-0.00410076
576.6	0.792076	0.373784	0.139511	646.6	0.150669	0.068103	0.0309117	584.2	0.224424	0.0742468	0.0213072	576.6	0.356595	0.21816	0.0762137	576.6	0.182833	0.0557827	0.0167836	576.6	0.00182443	-0.00559877	-0.00470207
576.8	0.791603	0.373211	0.139504	646.8	0.151138	0.0687139	0.031619	584.4	0.224305	0.0742335	0.0211705	576.8	0.35664	0.218306	0.0758305	576.8	0.182831	0.0562979	0.0169652	576.8	0.00195573	-0.0056499	-0.00431759
577	0.791032	0.372604	0.139674	647	0.151826	0.06919	0.0317656	584.6	0.224688	0.0743539	0.0216052	577	0.356117	0.21755	0.0756911	577	0.182413	0.0555357	0.0170675	577	0.00155979	-0.00617955	-0.00430689
577.2	0.791121	0.372307	0.139899	647.2	0.151662	0.0686157	0.0316478	584.8	0.224574	0.0743741	0.0209998	577.2	0.356097	0.217179	0.0753008	577.2	0.181972	0.0549808	0.0168316	577.2	0.00126636	-0.00621922	-0.00424196
577.4	0.790872	0.371897	0.139805	647.4	0.151905	0.0689022	0.0319852	585	0.224909	0.074727	0.0215658	577.4	0.355424	0.216146	0.0749143	577.4	0.181773	0.054925	0.01648	577.4	0.00071926	-0.00668662	-0.00435873
577.6	0.791153	0.372048	0.13961	647.6	0.152006	0.0690464	0.032051	585.2	0.225309	0.0743242	0.0219832	577.6	0.355507	0.216209	0.0747715	577.6	0.180995	0.0546573	0.0165312	577.6	0.00052351	-0.00661939	-0.00411707
577.8	0.790723	0.372103	0.139416	647.8	0.152046	0.0693936	0.0320657	585.4	0.225112	0.0740754	0.0213742	577.8	0.355421	0.216441	0.0747623	577.8	0.181258	0.0547688	0.0164637	577.8	0.00130301	-0.00636198	-0.00368129
578	0.790966	0.37257	0.140015	648	0.152152	0.0691218	0.0320831	585.6	0.22492	0.0741833	0.0213499	578	0.355462	0.216483	0.0743524	578	0.180456	0.0549466	0.0164898	578	0.00217151	-0.0064051	-0.00307797
578.2	0.791247	0.373041	0.140695	648.2	0.152356	0.0690004	0.0321348	585.8	0.224942	0.0742505	0.0214961	578.2	0.355344	0.216284	0.0741935	578.2	0.180166	0.0548304	0.016345	578.2	0.00287534	-0.00609467	-0.00290442
578.4	0.791036	0.373317	0.141042	648.4	0.15231	0.0688525	0.03189	586	0.22473	0.0746501	0.0220036	578.4	0.354909	0.215954	0.0746992	578.4	0.179831	0.0548141	0.0161402	578.4	0.00227655	-0.00643623	-0.00329855
578.6	0.791072	0.373163	0.14047	648.6	0.15275	0.0693769	0.0323384	586.2	0.224792	0.074913	0.0219685	578.6	0.356036	0.216688	0.0757184	578.6	0.179667	0.0551809	0.0158719	578.6	0.0021335	-0.00618624	-0.00349339
578.8	0.791069	0.373713	0.140511	648.8	0.151857	0.0691264	0.0317374	586.4	0.224555	0.0753349	0.0221946	578.8	0.356351	0.217303	0.0756174	578.8	0.179551	0.0552483	0.0158664	578.8	0.0025753	-0.00600456	-0.00361783
579	0.791143	0.373611	0.140753	649	0.151978	0.0691511	0.0323482	586.6	0.22407	0.075083	0.0218387	579	0.356232	0.217326	0.0755679	579	0.180145	0.0554285	0.0166099	579	0.00269807	-0.00607195	-0.00354334
579.2	0.791448	0.373714	0.140958	649.2	0.15141	0.0690294	0.0321824	586.8	0.224305	0.0755585	0.0223064	579.2	0.354919	0.216785	0.0752388	579.2	0.180105	0.0554899	0.0167781	579.2	0.00330888	-0.00545263	-0.00305653
579.4	0.791122	0.374169	0.140867	649.4	0.150752	0.0689414	0.0316837	587	0.224373	0.076003	0.0225289	579.4	0.354074	0.216741	0.0754185	579.4	0.179947	0.0548823	0.0171251	579.4	0.00298293	-0.00540681	-0.00340087
579.6	0.790905	0.374539	0.140959	649.6	0.151287	0.0692734	0.0317029	587.2	0.224287	0.0763238	0.0227171	579.6	0.354443	0.217123	0.0756332	579.6	0.179465	0.0540172	0.0167112	579.6	0.00265244	-0.00568573	-0.00338556
579.8	0.79145	0.375434	0.141413	649.8	0.151742	0.0690086	0.032321	587.4	0.224794	0.0766673	0.0236417	579.8	0.353968	0.217016	0.0758119	579.8	0.179444	0.0541564	0.0168206	579.8	0.00217636	-0.00571205	-0.00345957
580	0.790983	0.375318	0.141187	650	0.151759	0.068964	0.0320525	587.6	0.224403	0.0766062	0.0233616	580	0.353756	0.217061	0.0764649	580	0.179354	0.0544284	0.0167236	580	0.00194722	-0.00568956	-0.00375861
580.2	0.790868	0.37522	0.141123	650.2	0.151378	0.06836	0.0318783	587.8	0.223814	0.0760157	0.0230967	580.2	0.353708	0.217221	0.0766188	580.2	0.179079	0.0542375	0.0163278	580.2	0.00187885	-0.00589299	-0.00346234
580.4	0.790293	0.375259	0.140889	650.4	0.151123	0.0681889	0.0313131	588	0.22328	0.0756598	0.0228749	580.4	0.353784	0.217618	0.0772046	580.4	0.179193	0.0540686	0.0162071	580.4	0.00166326	-0.00691431	-0.00365701
580.6	0.789892	0.374825	0.14106	650.6	0.150803	0.0676712	0.0313125	588.2	0.222626	0.0753271	0.0227201	580.6	0.35329	0.21746	0.0769228	580.6	0.179382	0.0540428	0.0162798	580.6	0.00091675	-0.00747411	-0.00409307
580.8	0.788855	0.373922	0.140528	650.8	0.150903	0.067885	0.0314573	588.4	0.222054	0.0750883	0.0224125	580.8	0.352988	0.217904	0.0764704	580.8	0.17979	0.0547783	0.0165763	580.8	0.00041384	-0.00739929	-0.00352969
581	0.788552	0.373254	0.140532	651	0.150938	0.0674333	0.0311244	588.6	0.221503	0.0743186	0.0223956	581	0.352588	0.217075	0.0763927	581	0.179718	0.0541875	0.0161645	581	0.00019552	-0.00794703	-0.0037899
581.2	0.788488	0.373329	0.140523	651.2	0.150749	0.0668282	0.0310887	588.8	0.221168	0.0738215	0.021937	581.2	0.352194	0.216879	0.0755305	581.2	0.179982	0.0544836	0.0161696	581.2	0.00028997	-0.00780645	-0.00366336
581.4	0.787707	0.372628	0.140729	651.4	0.150863	0.066996	0.0309604	589	0.22129	0.0736627	0.0218221	581.4	0.352388	0.216419	0.0758967	581.4	0.180071	0.0544289	0.0159669	581.4	0.00023488	-0.00782748	-0.00372038
581.6	0.787754	0.372379	0.140862	651.6	0.150736	0.0665417	0.0305035	589.2	0.220959	0.07339	0.0219751	581.6	0.352497	0.216821	0.0756293	581.6	0.179621	0.053928	0.0155331	581.6	0.00068504	-0.00739188	-0.00326468
581.8	0.786636	0.371301	0.140125	651.8	0.150407	0.0662137	0.0297065	589.4	0.220027	0.0731244	0.0210803	581.8	0.351987	0.21621	0.0752823	581.8	0.179787	0.0543737	0.0155447	581.8	0.00115236	-0.00726151	-0.00310244
582	0.786807	0.371146	0.140825	652	0.150356	0.065721	0.0291806	589.6	0.219447	0.072727	0.0206505	582	0.351568	0.215589	0.0744613	582	0.179474	0.0545227	0.0150516	582	0.00139089	-0.0070262	-0.00298558
582.2	0.786606	0.370559	0.140871	652.2	0.150361	0.0657659	0.0291042	589.8	0.21889	0.07286	0.020484	582.2	0.351293	0.214792	0.0739941	582.2	0.179493	0.0548599	0.0155962	582.2	0.0012515	-0.00656351	-0.00322263
582.4	0.786302	0.370261	0.140846	652.4	0.150036	0.0652003	0.0287028	590	0.218483	0.0722559	0.0197661	582.4	0.351552	0.214596	0.0740241	582.4	0.179742	0.0554197	0.0156944	582.4	0.00140668	-0.00595588	-0.00303297
582.6	0.785914	0.36975	0.140302	652.6	0.149802	0.065052	0.028681	590.2	0.218502	0.0721579	0.0195737	582.6	0.351688	0.21471	0.0738011	582.6	0.179823	0.0553918	0.0158855	582.6	0.00136532	-0.0063183	-0.00315641
582.8	0.785475	0.369435	0.140164	652.8	0.149616	0.0647957	0.0282836	590.4	0.217985	0.0717895	0.0188999	582.8	0.351065	0.214456	0.0729606	582.8	0.179161	0.0548408	0.0153331	582.8	0.00208022	-0.00605048	-0.00317167
583	0.785649	0.369006	0.140026	653	0.149616	0.0646761	0.0284375	590.6	0.217764	0.0714891	0.0185978	583	0.350455	0.213408	0.0724181	583	0.178818	0.054891	0.0158312	583	0.00223916	-0.00590964	-0.00292168
583.2	0.785256	0.369375	0.139936	653.2	0.149815	0.0647728	0.0284821	590.8	0.218351	0.0720537	0.0189564	583.2	0.349894	0.212861	0.072555	583.2	0.17818	0.0541367	0.0151013	583.2	0.00228648	-0.00602799	-0.00313737
583.4	0.784245	0.369295	0.139556	653.4	0.149514	0.0647368	0.0283196	591	0.218575	0.0719652	0.0187535	583.4	0.350039	0.212761	0.0733065	583.4	0.177974	0.0537121	0.0149005	583.4	0.0022336	-0.00598272	-0.00353944
583.6	0.784022	0.369544	0.139432	653.6	0.150177	0.064576	0.0285293	591.2	0.218347	0.0715437	0.0183917	583.6	0.350219	0.212964	0.0738452	583.6	0.177647	0.0537059	0.014563	583.6	0.00186118	-0.00589961	-0.00362547
583.8	0.784101	0.370453	0.139724	653.8	0.150347	0.0650234	0.0296041	591.4	0.218479	0.0714174	0.0182175	583.8	0.349864	0.212297	0.073845	583.8	0.177248	0.053528	0.0143832	583.8	0.00210112	-0.00563556	-0.003479
584	0.783063	0.370587	0.138983	654	0.149928	0.0650332	0.0291146	591.6	0.217629	0.071195	0.0184789	584	0.349782	0.21219	0.0739356	584	0.176393	0.053272	0.013774	584	0.0022557	-0.00571385	-0.00337221
584.2	0.782902	0.370973	0.13887	654.2	0.149682	0.0645757	0.0286898	591.8	0.2169	0.0709381	0.0182301	584.2	0.349758	0.212548	0.0737437	584.2	0.175348	0.0521273	0.0128951	584.2	0.00185374	-0.00639458	-0.00320656
584.4	0.782545	0.371233	0.138856	654.4	0.14989	0.064886	0.0290784	592	0.216864	0.0708395	0.0186332	584.4	0.349751	0.212754	0.0739551	584.4	0.174692	0.0516831	0.0126207	584.4	0.00155678	-0.00692683	-0.003286
584.6	0.782668	0.37131	0.138891	654.6	0.149427	0.0645992	0.028997	592.2	0.216258	0.0705098	0.0184316	584.6	0.350035	0.212903	0.0736885	584.6	0.174319	0.0520443	0.0130209	584.6	0.00099221	-0.00736543	-0.00362504
584.8	0.782535	0.371123	0.139253	654.8	0.149187	0.064908	0.0289026	592.4	0.21582	0.0703743	0.0186902	584.8	0.350549	0.213885	0.0746334	584.8	0.173773	0.0516388	0.0128171	584.8	0.0010553	-0.00737025	-0.00383413
585	0.782647	0.371301	0.139607	655	0.149372	0.0651678	0.0290821	592.6	0.215859	0.0703272	0.0190947	585	0.349498	0.213728	0.0746656	585	0.173538	0.0509857	0.0124151	585	0.00086723	-0.00778233	-0.00433616
585.2	0.782731	0.371538	0.140502	655.2	0.14992	0.0658586	0.0299017	592.8	0.215809	0.0705795	0.01936	585.2	0.349063	0.21394	0.0745774	585.2	0.17333	0.0504271	0.012039	585.2	0.00040857	-0.00801974	-0.00433373
585.4	0.782907	0.371144	0.141102	655.4	0.149805	0.0662884	0.0296941	593	0.215144	0.070321	0.0194412	585.4	0.348998	0.213894	0.0751749	585.4	0.172923	0.049611	0.0117073	585.4	0.00060524	-0.0078649	-0.00461071
585.6	0.783134	0.371269	0.141331	655.6	0.149693	0.0664664	0.0298274	593.2	0.213766	0.0699573	0.0193585	585.6	0.348489	0.214195	0.0743548	585.6	0.173199	0.0493004	0.0116573	585.6	0.00141556	-0.00702724	-0.0038618
585.8	0.782694	0.370784	0.140926	655.8	0.149398	0.0666286	0.0295207	593.4	0.213036	0.0697536	0.0188432	585.8	0.34802	0.213823	0.0745341	585.8	0.173109	0.0496248	0.0123408	585.8	0.00126079	-0.00701919	-0.0046626
586	0.783755	0.371186	0.141733	656	0.149322	0.0668425	0.0296049	593.6	0.212631	0.0696106	0.0190266	586	0.347318	0.213779	0.0739638	586	0.173034	0.0500699	0.0125411	586	0.00115877	-0.00698718	-0.00455687
586.2	0.783585	0.370435	0.141346	656.2	0.149499	0.06736	0.0294776	593.8	0.212067	0.0702245	0.0188891	586.2	0.346875	0.213538	0.0736597	586.2	0.172795	0.0504441	0.0132427	586.2	0.00130171	-0.00635007	-0.00386477
586.4	0.78337	0.370286	0.140841	656.4	0.149148	0.0670154	0.0290619	594	0.212273	0.0700574	0.0186918	586.4	0.346816	0.213988	0.0735329	586.4	0.172565	0.0507884	0.0130214	586.4	0.00134457	-0.0065034	-0.00387375
586.6	0.783408	0.369835	0.140532	656.6	0.148498	0.0666849	0.0286738	594.2	0.212409	0.0706788	0.0191462	586.6	0.346147	0.213834	0.0734291	586.6	0.172811	0.0512893	0.0137722	586.6	0.00097785	-0.00713668	-0.00428154
586.8	0.783508	0.36985	0.139914	656.8	0.148837	0.0667737	0.0287325	594.4	0.212287	0.0714053	0.0195143	586.8	0.344944	0.213081	0.0729282	586.8	0.172611	0.0515222	0.0140479	586.8	0.00166481	-0.00665817	-0.00443847
587	0.783587	0.369444	0.139549	657	0.148456	0.0666664	0.0285194	594.6	0.212459	0.0717393	0.0196762	587	0.344558	0.212716	0.072678	587	0.17289	0.0517358	0.0144163	587	0.00179995	-0.00646547	-0.00436969
587.2	0.782634	0.368937	0.139274	657.2	0.147901	0.0662026	0.0281488	594.8	0.21292	0.0715387	0.019864	587.2	0.344687	0.213181	0.0731754	587.2	0.173124	0.0516268	0.0142635	587.2	0.00194974	-0.00622739	-0.00407708
587.4	0.782674	0.368933	0.13896	657.4	0.147639	0.0656359	0.0281306	595	0.212931	0.0715954	0.0198236	587.4	0.344299	0.212825	0.073316	587.4	0.173128	0.0514285	0.0141337	587.4	0.00199973	-0.00581756	-0.00386451
587.6	0.782928	0.369452	0.139196	657.6	0.147738	0.0655056	0.0284565	595.2	0.212663	0.071169	0.019904	587.6	0.344377	0.213124	0.0734435	587.6	0.173192	0.0511693	0.0141991	587.6	0.00223382	-0.0056077	-0.00304919
587.8	0.78246	0.369418	0.139054	657.8	0.14758	0.0656082	0.0285551	595.4	0.212721	0.0715154	0.0203788	587.8	0.343677	0.212176	0.0727979	587.8	0.173112	0.0513379	0.0139103	587.8	0.00293583	-0.00522633	-0.00256119
588	0.781446	0.368833	0.138353	658	0.147585	0.0652584	0.0280219	595.6	0.212146	0.0715986	0.020855	588	0.343216	0.211941	0.0722767	588	0.172313	0.0510438	0.0131961	588	0.00266027	-0.00531101	-0.0027853
588.2	0.781615	0.369075	0.138408	658.2	0.147223	0.0649382	0.0280703	595.8	0.212128	0.071683	0.020324	588.2	0.343055	0.212291	0.0719801	588.2	0.171462	0.0506809	0.0130712	588.2	0.00337321	-0.00541789	-0.00224685
588.4	0.781523	0.369337	0.138506	658.4	0.146984	0.0649596	0.0278782	596	0.211801	0.0711307	0.020688	588.4	0.343485	0.212691	0.0726043	588.4	0.171125	0.0511906	0.0134191	588.4	0.00350543	-0.00537708	-0.00175113
588.6	0.781693	0.369767	0.138535	658.6	0.145818	0.0641118	0.0266765	596.2	0.211016	0.070649	0.0207296	588.6	0.343938	0.21347	0.0733421	588.6	0.171152	0.0512804	0.0135758	588.6	0.00341055	-0.00586262	-0.00220373
588.8	0.781043	0.36974	0.138688	658.8	0.14563	0.0643421	0.0268431	596.4	0.210936	0.0701177	0.0207988	588.8	0.344321	0.214191	0.0741819	588.8	0.170866	0.0511159	0.0134687	588.8	0.00336222	-0.00624433	-0.00253426
589	0.780942	0.370224	0.139239	659	0.146251	0.0645932	0.0273291	596.6	0.210325	0.0698461	0.0204463	589	0.343757	0.213663	0.0737119	589	0.170334	0.0510145	0.0136347	589	0.00279767	-0.00644776	-0.00251684
589.2	0.781061	0.370285	0.139878	659.2	0.146487	0.0644048	0.0270501	596.8	0.209258	0.069336	0.0200842	589.2	0.344412	0.213406	0.0739777	589.2	0.169937	0.0508743	0.0135063	589.2	0.00296152	-0.00658031	-0.00236515
589.4	0.781044	0.37023	0.139988	659.4	0.146067	0.0641313	0.0264047	597	0.207986	0.0684531	0.0194279	589.4	0.344706	0.213306	0.0741112	589.4	0.169878	0.0513012	0.0140209	589.4	0.00325141	-0.00671006	-0.00249158
589.6	0.780768	0.370741	0.140194	659.6	0.146428	0.0641648	0.0266939	597.2	0.207446	0.0685372	0.0193746	589.6	0.34473	0.213118	0.073413	589.6	0.169914	0.0515566	0.0149252	589.6	0.0036417	-0.0061475	-0.00208623
589.8	0.78022	0.370591	0.139946	659.8	0.145883	0.0639745	0.0264668	597.4	0.207442	0.0682899	0.0188848	589.8	0.344759	0.212844	0.0736921	589.8	0.169796	0.0522936	0.0154495	589.8	0.00271962	-0.00670083	-0.00329767
590	0.780392	0.370311	0.139768	660	0.145927	0.0642124	0.0262024	597.6	0.207674	0.0684527	0.0191848	590	0.344197	0.212272	0.073615	590	0.169398	0.0523334	0.0153505	590	0.00218185	-0.00715007	-0.00304337
590.2	0.77933	0.369534	0.139257	660.2	0.146527	0.0649174	0.0263668	597.8	0.207343	0.0683346	0.0188403	590.2	0.344457	0.212628	0.073736	590.2	0.168767	0.0522149	0.0152782	590.2	0.00174119	-0.00710362	-0.00336567
590.4	0.779236	0.369348	0.139069	660.4	0.14633	0.0650248	0.0258856	598	0.207685	0.0677361	0.0187992	590.4	0.343794	0.212365	0.0736586	590.4	0.168665	0.0525926	0.0153236	590.4	0.00082478	-0.00761628	-0.0044253
590.6	0.778882	0.368852	0.139191	660.6	0.146113	0.0648268	0.0254898	598.2	0.207051	0.0673252	0.0186109	590.6	0.342999	0.211293	0.0736505	590.6	0.168989	0.0522886	0.0158323	590.6	0.00120683	-0.00758506	-0.00487866
590.8	0.778119	0.368289	0.138847	660.8	0.146303	0.0654054	0.025677	598.4	0.206784	0.0672029	0.0187834	590.8	0.3425	0.210759	0.0730986	590.8	0.168683	0.051557	0.0158119	590.8	0.00127643	-0.00725926	-0.0053696
591	0.77739	0.367594	0.138742	661	0.14633	0.0654948	0.0257083	598.6	0.207101	0.0672736	0.0184492	591	0.342798	0.210612	0.0731844	591	0.168783	0.0512649	0.0158193	591	0.00061207	-0.0068734	-0.00529124
591.2	0.776928	0.367248	0.138551	661.2	0.146016	0.0649559	0.0254889	598.8	0.207622	0.0669721	0.0188444	591.2	0.342486	0.21015	0.0728337	591.2	0.168427	0.0508255	0.0156611	591.2	0.00016002	-0.00696944	-0.00539506
591.4	0.776985	0.367439	0.138525	661.4	0.146289	0.0650254	0.0260059	599	0.20806	0.0673987	0.0189977	591.4	0.341848	0.20957	0.0730004	591.4	0.168051	0.0503312	0.015268	591.4	0.00080558	-0.00664449	-0.00511475
591.6	0.776337	0.367027	0.138715	661.6	0.146085	0.0651514	0.0259196	599.2	0.208189	0.0679489	0.0189972	591.6	0.341717	0.209696	0.0728775	591.6	0.168308	0.049876	0.0153429	591.6	0.00084801	-0.00722237	-0.00481301
591.8	0.775942	0.366696	0.138906	661.8	0.146312	0.0656778	0.0263654	599.4	0.208792	0.0689075	0.019103	591.8	0.341217	0.209804	0.0733098	591.8	0.16793	0.0502488	0.015074	591.8	0.00093349	-0.00704493	-0.00504467
592	0.776048	0.366429	0.13826	662	0.146065	0.065625	0.0261896	599.6	0.209244	0.0699439	0.0195555	592	0.341325	0.209824	0.0730945	592	0.167436	0.0497014	0.0151535	592	0.00098107	-0.00690346	-0.00501767
592.2	0.775988	0.366828	0.138264	662.2	0.145347	0.0656632	0.0265163	599.8	0.209498	0.0698019	0.0196936	592.2	0.341486	0.210185	0.0735708	592.2	0.16716	0.0498947	0.0150307	592.2	0.00117327	-0.0070248	-0.00439825
592.4	0.776201	0.366635	0.138197	662.4	0.145278	0.0654446	0.026152	600	0.208873	0.0696999	0.019889	592.4	0.341963	0.210599	0.0747632	592.4	0.167244	0.0499291	0.0147489	592.4	0.00099793	-0.00680735	-0.00431787
592.6	0.776314	0.366545	0.138503	662.6	0.144512	0.0650876	0.026304	600.2	0.208554	0.0697819	0.0199632	592.6	0.341549	0.210297	0.0741283	592.6	0.167008	0.0501481	0.0149264	592.6	0.00116761	-0.00711975	-0.00437507
592.8	0.776454	0.366071	0.138566	662.8	0.144875	0.065012	0.0265596	600.4	0.208647	0.0698908	0.0198548	592.8	0.341633	0.210282	0.0742548	592.8	0.166551	0.050269	0.0152952	592.8	0.00098291	-0.00718166	-0.00426975
593	0.776363	0.365629	0.138705	663	0.145437	0.0647825	0.026704	600.6	0.207831	0.0701156	0.0197842	593	0.341101	0.210219	0.0736292	593	0.166377	0.0502051	0.0151885	593	0.000671	-0.00730204	-0.00427856
593.2	0.776416	0.365671	0.138695	663.2	0.145314	0.0643558	0.0267657	600.8	0.206872	0.0698748	0.0192736	593.2	0.340595	0.209992	0.0730306	593.2	0.166885	0.0504633	0.0156019	593.2	0.00118593	-0.00722044	-0.00374845
593.4	0.776267	0.365719	0.138597	663.4	0.145534	0.0641571	0.0272135	601	0.20639	0.0695536	0.019049	593.4	0.340482	0.209607	0.0727256	593.4	0.16741	0.0507547	0.016129	593.4	0.00144429	-0.00706918	-0.00380186
593.6	0.775366	0.365706	0.138209	663.6	0.145863	0.0637085	0.027313	601.2	0.205864	0.069592	0.0188603	593.6	0.340268	0.20943	0.072674	593.6	0.167341	0.0507298	0.0162243	593.6	0.00182162	-0.00631728	-0.00335434
593.8	0.775037	0.365772	0.138074	663.8	0.145845	0.0637358	0.0273672	601.4	0.205536	0.0690608	0.0186114	593.8	0.340705	0.209646	0.0731494	593.8	0.168072	0.0513297	0.0160514	593.8	0.00125365	-0.00686987	-0.00414165
594	0.77536	0.366118	0.138446	664	0.146251	0.0639629	0.0272363	601.6	0.204891	0.0688452	0.0184175	594	0.340829	0.20957	0.0736816	594	0.168091	0.0516063	0.0161415	594	0.00132397	-0.00699193	-0.003548
594.2	0.775166	0.365778	0.138304	664.2	0.146852	0.064281	0.0270645	601.8	0.203774	0.0677275	0.0177677	594.2	0.340556	0.209674	0.0735707	594.2	0.167553	0.0510647	0.0154938	594.2	0.00109311	-0.00656428	-0.00396189
594.4	0.775143	0.366043	0.138433	664.4	0.14698	0.0639583	0.0267292	602	0.203542	0.0675739	0.0182653	594.4	0.340411	0.209081	0.0734069	594.4	0.167557	0.0512653	0.0151949	594.4	0.00114524	-0.00598062	-0.00355084
594.6	0.774586	0.365475	0.138128	664.6	0.146962	0.063352	0.0266233	602.2	0.202653	0.0673569	0.0182112	594.6	0.340911	0.208689	0.0732397	594.6	0.167426	0.0504838	0.015133	594.6	0.00132558	-0.00552116	-0.0034468
594.8	0.774905	0.36618	0.138493	664.8	0.146047	0.0631827	0.02658	602.4	0.202479	0.0677045	0.0186635	594.8	0.340803	0.209016	0.0732321	594.8	0.166603	0.0499426	0.0145247	594.8	0.00109203	-0.00536678	-0.00351883
595	0.774937	0.366344	0.138165	665	0.146188	0.063052	0.0267263	602.6	0.202427	0.0679638	0.0186044	595	0.340796	0.209034	0.0735598	595	0.166268	0.0497837	0.0143794	595	0.00116626	-0.00486436	-0.00307751
595.2	0.774509	0.366185	0.137751	665.2	0.145936	0.062724	0.0264263	602.8	0.202307	0.0676843	0.018579	595.2	0.340683	0.208721	0.0734129	595.2	0.165154	0.049302	0.0134675	595.2	0.00141409	-0.00513279	-0.00278817
595.4	0.77436	0.366255	0.137958	665.4	0.146445	0.062845	0.0270834	603	0.202082	0.0676492	0.017943	595.4	0.340226	0.208831	0.0738507	595.4	0.164473	0.0484911	0.0131356	595.4	0.00195582	-0.00519076	-0.00232974
595.6	0.774208	0.365965	0.138151	665.6	0.147084	0.0633583	0.0279312	603.2	0.202114	0.0679269	0.0179821	595.6	0.339959	0.208736	0.0732064	595.6	0.164325	0.048619	0.012859	595.6	0.00137005	-0.00617373	-0.00253749
595.8	0.774339	0.365949	0.138124	665.8	0.147172	0.0636055	0.028729	603.4	0.202608	0.0679705	0.0180854	595.8	0.33958	0.208614	0.0735084	595.8	0.163968	0.0490247	0.0123888	595.8	0.00154903	-0.00573711	-0.00250091
596	0.773826	0.365525	0.136878	666	0.146206	0.0626056	0.0283789	603.6	0.20242	0.0678967	0.018325	596	0.339044	0.207658	0.0726141	596	0.163577	0.0486609	0.0123226	596	0.00164784	-0.00555106	-0.00254116
596.2	0.773475	0.365653	0.137207	666.2	0.146173	0.0628001	0.028701	603.8	0.202347	0.0672575	0.0185149	596.2	0.338775	0.207819	0.0729291	596.2	0.162593	0.0477663	0.0118313	596.2	0.00203196	-0.00568151	-0.00223343
596.4	0.773393	0.365361	0.137157	666.4	0.145988	0.0624087	0.0284628	604	0.202593	0.0673208	0.0187095	596.4	0.338766	0.207988	0.0730036	596.4	0.162558	0.0481783	0.0120988	596.4	0.00214884	-0.00599065	-0.00219727
596.6	0.772732	0.365052	0.136859	666.6	0.145901	0.0618448	0.0284789	604.2	0.202489	0.0668947	0.0192144	596.6	0.338172	0.207608	0.0723922	596.6	0.162348	0.0482371	0.0126155	596.6	0.00243539	-0.00660036	-0.00271173
596.8	0.772914	0.364913	0.136471	666.8	0.145991	0.0612093	0.0278636	604.4	0.202606	0.0667774	0.0197228	596.8	0.338302	0.208173	0.0728755	596.8	0.162861	0.0479648	0.0130506	596.8	0.00191622	-0.00695255	-0.00331388
597	0.772633	0.365134	0.135984	667	0.14595	0.0610587	0.0279363	604.6	0.201906	0.066216	0.0196365	597	0.338409	0.208396	0.0730029	597	0.163405	0.0482228	0.013296	597	0.0020775	-0.00723012	-0.003586
597.2	0.772721	0.365916	0.136198	667.2	0.145946	0.0609513	0.0273353	604.8	0.201049	0.065708	0.0191637	597.2	0.33778	0.207276	0.0725044	597.2	0.163851	0.048323	0.0134288	597.2	0.00260311	-0.00724092	-0.00356219
597.4	0.7728	0.366095	0.137099	667.4	0.146074	0.0612234	0.0272464	605	0.200446	0.0652569	0.0193149	597.4	0.337907	0.207196	0.0728095	597.4	0.164212	0.0489836	0.0137098	597.4	0.00244705	-0.00737681	-0.0041989
597.6	0.772636	0.366348	0.137372	667.6	0.146021	0.0613286	0.0272323	605.2	0.200069	0.0656632	0.0193854	597.6	0.337872	0.207234	0.0729876	597.6	0.164102	0.0490258	0.013229	597.6	0.00262815	-0.00718273	-0.00432268
597.8	0.772828	0.366438	0.137878	667.8	0.145614	0.0615639	0.0271891	605.4	0.200434	0.0658924	0.0201629	597.8	0.337903	0.206812	0.0728087	597.8	0.164435	0.0497896	0.0136657	597.8	0.00197207	-0.00769814	-0.0048944
598	0.77303	0.366399	0.138392	668	0.145272	0.0614456	0.0268175	605.6	0.199932	0.0660815	0.02031	598	0.337957	0.207347	0.0736397	598	0.16457	0.0501412	0.0142446	598	0.00193542	-0.0075955	-0.00458713
598.2	0.772865	0.365784	0.137946	668.2	0.145393	0.0617185	0.0268088	605.8	0.200102	0.065981	0.0207406	598.2	0.338247	0.207972	0.0741209	598.2	0.163906	0.049405	0.0140388	598.2	0.00107796	-0.00748032	-0.00528466
598.4	0.772688	0.366033	0.138565	668.4	0.144712	0.0616368	0.02681	606	0.200394	0.0669048	0.0211703	598.4	0.338435	0.208316	0.0738637	598.4	0.163769	0.0492808	0.0139331	598.4	0.00057177	-0.00777244	-0.00515598
598.6	0.773047	0.365599	0.138468	668.6	0.144029	0.0615417	0.0266734	606.2	0.1997	0.0665904	0.0205204	598.6	0.338343	0.208616	0.0742465	598.6	0.163324	0.0489801	0.0136094	598.6	0.00054931	-0.00773239	-0.00508391
598.8	0.773087	0.365826	0.139203	668.8	0.143788	0.0619582	0.0267253	606.4	0.19932	0.066874	0.0206324	598.8	0.338163	0.209123	0.0744546	598.8	0.163011	0.0489824	0.013689	598.8	0.00040986	-0.00741703	-0.00531765
599	0.772634	0.365016	0.138839	669	0.144401	0.0624622	0.0271612	606.6	0.198793	0.0664648	0.0197322	599	0.337695	0.208901	0.0745074	599	0.163064	0.049382	0.0136804	599	0.0003962	-0.00734036	-0.00485919
599.2	0.772052	0.364542	0.139288	669.2	0.144536	0.0630493	0.0273268	606.8	0.198532	0.0664401	0.0190092	599.2	0.3368	0.208554	0.0744005	599.2	0.162876	0.0495292	0.0141629	599.2	0.00016259	-0.00756613	-0.00488235
599.4	0.772158	0.364323	0.139536	669.4	0.145409	0.0636686	0.0280475	607	0.19858	0.0663812	0.0184995	599.4	0.3364	0.209054	0.0742699	599.4	0.162576	0.0498189	0.0144192	599.4	-0.0002319	-0.00781828	-0.00489288
599.6	0.77163	0.363432	0.139297	669.6	0.144746	0.0635998	0.0280209	607.2	0.198757	0.0666186	0.0187376	599.6	0.336451	0.209238	0.0737549	599.6	0.162983	0.0501709	0.0148046	599.6	-0.00037041	-0.00789192	-0.00486088
599.8	0.771523	0.363238	0.139111	669.8	0.144107	0.0631273	0.0278647	607.4	0.198757	0.0668894	0.018809	599.8	0.336114	0.208872	0.0738428	599.8	0.162556	0.0497752	0.0148191	599.8	-1.758e-05	-0.00745116	-0.00453637
600	0.770807	0.362931	0.138314	670	0.143257	0.0624279	0.0272516	607.6	0.198636	0.0664969	0.018632	600	0.335932	0.208807	0.0738575	600	0.162068	0.0489373	0.014791	600	0.00020887	-0.00729725	-0.00417399
600.2	0.77071	0.363286	0.138427	670.2	0.14377	0.0628056	0.0270745	607.8	0.19913	0.0662112	0.0186594	600.2	0.335795	0.208884	0.0739752	600.2	0.161715	0.0484592	0.0148655	600.2	0.00085077	-0.00710577	-0.00322108
600.4	0.770201	0.362883	0.137649	670.4	0.143664	0.0622241	0.026931	608	0.198996	0.0655052	0.018338	600.4	0.335893	0.209068	0.0741621	600.4	0.161846	0.0489451	0.014852	600.4	0.00089307	-0.00697799	-0.00326524
600.6	0.770027	0.362877	0.137185	670.6	0.143808	0.0615942	0.0265033	608.2	0.19874	0.0650278	0.0186987	600.6	0.335665	0.208997	0.0743406	600.6	0.161727	0.0485585	0.0152851	600.6	0.0011575	-0.00645469	-0.00383692
600.8	0.770537	0.36311	0.136976	670.8	0.143502	0.0613732	0.0256086	608.4	0.197989	0.0647691	0.0187236	600.8	0.335915	0.208861	0.0743433	600.8	0.161546	0.0489122	0.0155106	600.8	0.00098865	-0.00575008	-0.00395916
601	0.769667	0.362869	0.136337	671	0.143384	0.0607272	0.0250086	608.6	0.197083	0.0641898	0.0183266	601	0.335772	0.208391	0.0741715	601	0.161302	0.0495929	0.0153653	601	0.00187142	-0.00526412	-0.0036655
601.2	0.769468	0.362946	0.136557	671.2	0.142569	0.0604616	0.0242901	608.8	0.196724	0.0640023	0.0181854	601.2	0.335209	0.207459	0.0731539	601.2	0.16102	0.0496194	0.0149176	601.2	0.00224705	-0.00477476	-0.0036189
601.4	0.769296	0.362459	0.136564	671.4	0.142287	0.0602722	0.0245918	609	0.196661	0.0636839	0.0182533	601.4	0.334974	0.207145	0.0730818	601.4	0.1605	0.0493754	0.0146754	601.4	0.00222617	-0.00435601	-0.00376589
601.6	0.768718	0.362221	0.135455	671.6	0.142342	0.0603532	0.0244882	609.2	0.196727	0.0638138	0.018467	601.6	0.334675	0.206275	0.0729803	601.6	0.159911	0.0489344	0.0142444	601.6	0.00278945	-0.00390398	-0.0035025
601.8	0.768364	0.361834	0.134929	671.8	0.142648	0.060251	0.0245605	609.4	0.196376	0.0634687	0.0185286	601.8	0.334961	0.205863	0.0729239	601.8	0.159705	0.0488866	0.0143863	601.8	0.00280888	-0.00384778	-0.00372213
602	0.767808	0.361535	0.134348	672	0.143034	0.0606892	0.0247511	609.6	0.195828	0.0637367	0.0185586	602	0.335436	0.206197	0.0737182	602	0.159472	0.0482056	0.0141913	602	0.00328199	-0.00348201	-0.00343761
602.2	0.767888	0.361286	0.134131	672.2	0.142926	0.0608328	0.0248345	609.8	0.195845	0.0635868	0.0178514	602.2	0.335482	0.205832	0.0736363	602.2	0.159101	0.0480818	0.0135807	602.2	0.00280922	-0.00367955	-0.00330663
602.4	0.768018	0.361487	0.134407	672.4	0.142826	0.0610651	0.0245588	610	0.195201	0.0636546	0.0169959	602.4	0.335301	0.205408	0.0732224	602.4	0.158839	0.0479574	0.0127979	602.4	0.00284319	-0.0043025	-0.00327823
602.6	0.767551	0.361417	0.13434	672.6	0.143063	0.060984	0.0242218	610.2	0.194849	0.0633951	0.01665	602.6	0.335054	0.205079	0.0728354	602.6	0.158621	0.0482755	0.0125727	602.6	0.00257735	-0.00417155	-0.00290426
602.8	0.76714	0.361364	0.134865	672.8	0.143351	0.0615371	0.024405	610.4	0.194799	0.0639515	0.0167891	602.8	0.334865	0.20471	0.0728242	602.8	0.158789	0.0480447	0.0130074	602.8	0.00232227	-0.00392637	-0.00322035
603	0.766905	0.361123	0.135192	673	0.143336	0.0621232	0.024961	610.6	0.194506	0.0638751	0.0164305	603	0.333829	0.204015	0.0724843	603	0.158798	0.048638	0.0127943	603	0.00223179	-0.00428137	-0.00309642
603.2	0.766226	0.360875	0.135229	673.2	0.143442	0.0634178	0.0254902	610.8	0.194472	0.0639525	0.0167918	603.2	0.333646	0.20404	0.0720663	603.2	0.158646	0.0489453	0.0132726	603.2	0.00184032	-0.004397	-0.00347879
603.4	0.766123	0.360626	0.135188	673.4	0.143922	0.0637587	0.0257883	611	0.194854	0.0642446	0.0174142	603.4	0.333493	0.204357	0.0714007	603.4	0.158391	0.0485724	0.0129911	603.4	0.00143008	-0.0046037	-0.00335827
603.6	0.76569	0.36042	0.135057	673.6	0.143776	0.0641146	0.0260198	611.2	0.194904	0.0644181	0.0180059	603.6	0.333436	0.204312	0.070807	603.6	0.158494	0.0478901	0.0129629	603.6	0.00161722	-0.00443984	-0.00350677
603.8	0.766116	0.360992	0.135265	673.8	0.14367	0.0644838	0.0262935	611.4	0.194686	0.0638593	0.0176425	603.8	0.332235	0.203432	0.0700668	603.8	0.157968	0.0474476	0.0123342	603.8	0.00160611	-0.00432477	-0.00359666
604	0.766068	0.361595	0.135276	674	0.143524	0.0643321	0.0261618	611.6	0.194116	0.0635036	0.0173123	604	0.331848	0.20373	0.0699994	604	0.158558	0.0473201	0.0120264	604	0.0014291	-0.00490589	-0.00365569
604.2	0.766158	0.362408	0.135874	674.2	0.143757	0.0640548	0.0264026	611.8	0.194457	0.0636612	0.0180485	604.2	0.330949	0.203919	0.0697401	604.2	0.158596	0.0471594	0.0122298	604.2	0.00175137	-0.00513665	-0.00370254
604.4	0.766147	0.362323	0.136194	674.4	0.143618	0.0632907	0.0264221	612	0.194076	0.0635205	0.0190633	604.4	0.330826	0.204262	0.0702255	604.4	0.158174	0.0466998	0.0117098	604.4	0.00124473	-0.00516691	-0.00456942
604.6	0.76614	0.362281	0.136424	674.6	0.143874	0.0630073	0.0261568	612.2	0.193681	0.0638054	0.0196564	604.6	0.330281	0.204214	0.0701207	604.6	0.158139	0.0466032	0.0121634	604.6	0.00072885	-0.00529967	-0.00516308
604.8	0.766265	0.362439	0.136791	674.8	0.14358	0.0628608	0.0260584	612.4	0.19313	0.0640489	0.0199452	604.8	0.330407	0.20421	0.0702618	604.8	0.15772	0.0469136	0.0123417	604.8	0.00082176	-0.00529197	-0.00523675
605	0.765417	0.362192	0.136789	675	0.143129	0.0624466	0.0260497	612.6	0.192602	0.0638541	0.0196926	605	0.329678	0.203941	0.0701122	605	0.1577	0.0469442	0.0125215	605	0.00142605	-0.00525719	-0.00509386
605.2	0.765944	0.362521	0.137349	675.2	0.142319	0.0619421	0.0256856	612.8	0.192608	0.0635163	0.0197846	605.2	0.329434	0.203869	0.0699173	605.2	0.15723	0.0463013	0.0124581	605.2	0.00160053	-0.00514437	-0.00500339
605.4	0.766214	0.362215	0.136904	675.4	0.142802	0.0620565	0.0257945	613	0.192334	0.063446	0.0192918	605.4	0.329347	0.203946	0.0703617	605.4	0.156673	0.0458245	0.0122552	605.4	0.0017507	-0.00551384	-0.0049816
605.6	0.766371	0.362448	0.136728	675.6	0.142745	0.0621883	0.0257154	613.2	0.192038	0.0636031	0.0191643	605.6	0.329236	0.203544	0.0703671	605.6	0.156398	0.0457882	0.0123684	605.6	0.00223009	-0.00573933	-0.00444702
605.8	0.76701	0.362796	0.137318	675.8	0.142494	0.061605	0.025656	613.4	0.192297	0.0634167	0.0191762	605.8	0.330215	0.204077	0.0714351	605.8	0.156286	0.0456253	0.0122485	605.8	0.00234191	-0.00596778	-0.00444372
606	0.76698	0.3623	0.137522	676	0.141948	0.0614149	0.0253541	613.6	0.192441	0.0642763	0.0192202	606	0.330456	0.204144	0.0718509	606	0.155609	0.0457931	0.0124392	606	0.00273798	-0.00592802	-0.00383152
606.2	0.767301	0.362181	0.138148	676.2	0.141058	0.0609847	0.0251248	613.8	0.192411	0.064284	0.0184029	606.2	0.330595	0.204369	0.0721261	606.2	0.155351	0.0459171	0.0125927	606.2	0.00247559	-0.00654098	-0.00358754
606.4	0.767162	0.361809	0.138273	676.4	0.141065	0.061031	0.0248154	614	0.19216	0.0641504	0.017952	606.4	0.330861	0.204641	0.0721751	606.4	0.155267	0.0457813	0.01317	606.4	0.0025494	-0.00680344	-0.00319531
606.6	0.766451	0.361267	0.138546	676.6	0.140698	0.0606386	0.0245218	614.2	0.191979	0.0641295	0.0176301	606.6	0.33078	0.204758	0.0721219	606.6	0.155108	0.045809	0.0137359	606.6	0.00184565	-0.00680777	-0.00287559
606.8	0.766787	0.360993	0.138242	676.8	0.140828	0.0610402	0.025581	614.4	0.19128	0.0638218	0.0171486	606.8	0.33043	0.204609	0.0726176	606.8	0.155611	0.0463097	0.0143953	606.8	0.00242732	-0.0060972	-0.00246324
607	0.765946	0.360405	0.138256	677	0.141049	0.0612551	0.0259165	614.6	0.191073	0.063506	0.0168265	607	0.330021	0.204055	0.0717966	607	0.155214	0.0471981	0.0145702	607	0.00257987	-0.00600511	-0.00220237
607.2	0.765416	0.360189	0.137631	677.2	0.14061	0.0616771	0.0259382	614.8	0.191169	0.0632219	0.016717	607.2	0.329767	0.204157	0.0713256	607.2	0.15536	0.0473619	0.0151652	607.2	0.002236	-0.00635014	-0.00282071
607.4	0.765486	0.35996	0.137662	677.4	0.140388	0.0613377	0.025657	615	0.191397	0.063465	0.0168388	607.4	0.32941	0.204276	0.0707937	607.4	0.155555	0.047266	0.0152401	607.4	0.00214816	-0.00610643	-0.00272556
607.6	0.765203	0.359833	0.137364	677.6	0.139692	0.0611676	0.0252774	615.2	0.19127	0.0628534	0.0168874	607.6	0.329561	0.203901	0.0706099	607.6	0.155858	0.0474226	0.0150916	607.6	0.00238805	-0.00613539	-0.00293393
607.8	0.765549	0.359959	0.137564	677.8	0.138756	0.0607903	0.024618	615.4	0.19045	0.0627043	0.0167743	607.8	0.328777	0.20345	0.0703491	607.8	0.155839	0.0473893	0.0147476	607.8	0.0022051	-0.0067329	-0.00326043
608	0.765037	0.360415	0.137538	678	0.138446	0.0600822	0.0242705	615.6	0.19007	0.062829	0.0173377	608	0.328569	0.203321	0.0706286	608	0.155961	0.0473056	0.0147093	608	0.00195146	-0.0074839	-0.00338317
608.2	0.764873	0.360254	0.137547	678.2	0.138981	0.0594777	0.0243739	615.8	0.189723	0.0626811	0.0178906	608.2	0.328299	0.203144	0.0707683	608.2	0.155416	0.0468233	0.0142688	608.2	0.00173766	-0.00736249	-0.00361695
608.4	0.764765	0.359849	0.137439	678.4	0.139475	0.0595478	0.0241915	616	0.18882	0.0624774	0.0177783	608.4	0.328588	0.202488	0.0711311	608.4	0.154758	0.0457954	0.0134507	608.4	0.00141523	-0.00714502	-0.00352315
608.6	0.763885	0.359148	0.13697	678.6	0.139987	0.0598512	0.0244519	616.2	0.188842	0.0622012	0.0174385	608.6	0.32775	0.201628	0.0707212	608.6	0.154531	0.0450771	0.0131635	608.6	0.00154296	-0.00682591	-0.00334655
608.8	0.763402	0.358936	0.137008	678.8	0.140306	0.0600477	0.0243213	616.4	0.188906	0.0621861	0.0171394	608.8	0.327494	0.200949	0.0709161	608.8	0.154368	0.0448384	0.0128839	608.8	0.00126102	-0.00632652	-0.00317938
609	0.762317	0.358326	0.136157	679	0.140602	0.0604241	0.0245784	616.6	0.188533	0.0619187	0.0167834	609	0.32704	0.200105	0.0706865	609	0.15407	0.0441402	0.0123515	609	0.00144117	-0.00599416	-0.00311229
609.2	0.762498	0.357942	0.136184	679.2	0.140493	0.0599804	0.024172	616.8	0.188899	0.0617908	0.016814	609.2	0.327366	0.200328	0.070847	609.2	0.154163	0.0442291	0.0121128	609.2	0.00133606	-0.00604822	-0.00318806
609.4	0.762961	0.358004	0.135873	679.4	0.141297	0.0609178	0.0245753	617	0.188991	0.0621995	0.0167398	609.4	0.327659	0.200378	0.0713692	609.4	0.154024	0.0437804	0.0115422	609.4	0.00173788	-0.00579326	-0.00273825
609.6	0.762543	0.358117	0.135686	679.6	0.141273	0.0606366	0.0242604	617.2	0.189571	0.062506	0.0170381	609.6	0.327879	0.200506	0.0718411	609.6	0.153978	0.0436717	0.0110355	609.6	0.00149634	-0.00592074	-0.00266007
609.8	0.762263	0.358063	0.13596	679.8	0.141317	0.0605242	0.0242827	617.4	0.190074	0.0630478	0.0178448	609.8	0.328484	0.201533	0.0730291	609.8	0.154084	0.0436745	0.0111043	609.8	0.00143153	-0.00615921	-0.00271313
610	0.761881	0.357885	0.1358	680	0.141654	0.0614383	0.0245916	617.6	0.189717	0.0641681	0.0183056	610	0.328306	0.201744	0.0729236	610	0.153774	0.0431811	0.011078	610	0.00221447	-0.00560459	-0.00230947
610.2	0.761396	0.358104	0.135633	680.2	0.14184	0.0613893	0.0250082	617.8	0.189438	0.0642838	0.0178304	610.2	0.328478	0.202344	0.0732342	610.2	0.154261	0.0430693	0.0110513	610.2	0.00151689	-0.00609596	-0.00280484
610.4	0.760741	0.357789	0.135124	680.4	0.142019	0.0618307	0.0250666	618	0.18889	0.0636483	0.017289	610.4	0.328345	0.202712	0.0734389	610.4	0.154714	0.0432008	0.0112189	610.4	0.00118371	-0.00629282	-0.0027848
610.6	0.760006	0.357847	0.134824	680.6	0.141823	0.0618821	0.0253243	618.2	0.188447	0.0635779	0.016723	610.6	0.328164	0.202914	0.073309	610.6	0.154719	0.04348	0.0111933	610.6	0.00071087	-0.0066186	-0.00292424
610.8	0.759996	0.357739	0.134229	680.8	0.142004	0.0623968	0.0257536	618.4	0.188434	0.0636472	0.0168361	610.8	0.327314	0.202789	0.0724888	610.8	0.154816	0.0442892	0.0117528	610.8	0.00124076	-0.00635577	-0.00293935
611	0.759351	0.357938	0.134662	681	0.141857	0.0622379	0.0257621	618.6	0.188737	0.0639402	0.0169724	611	0.327515	0.20317	0.0723467	611	0.15461	0.0450899	0.0121393	611	0.00135487	-0.00663634	-0.00336773
611.2	0.759861	0.358368	0.135157	681.2	0.14134	0.0626342	0.0259411	618.8	0.188543	0.063699	0.0169591	611.2	0.326608	0.203179	0.0718259	611.2	0.154625	0.0452581	0.0125668	611.2	0.00075027	-0.00758133	-0.00411817
611.4	0.760093	0.357975	0.135317	681.4	0.141571	0.0624715	0.0258882	619	0.188305	0.0637501	0.017623	611.4	0.326901	0.203364	0.0718394	611.4	0.154448	0.0455282	0.0126221	611.4	0.00074672	-0.00780273	-0.00429201
611.6	0.760319	0.35799	0.135223	681.6	0.140858	0.0622641	0.0255751	619.2	0.188093	0.063204	0.0182298	611.6	0.326871	0.203223	0.0714129	611.6	0.154579	0.0463023	0.0131772	611.6	0.00110493	-0.00815567	-0.00426786
611.8	0.760642	0.358452	0.135535	681.8	0.140663	0.0621995	0.0251536	619.4	0.187866	0.0633013	0.0185921	611.8	0.32626	0.203099	0.0710138	611.8	0.153716	0.0461523	0.0132273	611.8	0.00141042	-0.00841754	-0.00414274
612	0.760592	0.358972	0.135477	682	0.140557	0.0617729	0.0249593	619.6	0.187834	0.0625406	0.0182336	612	0.326043	0.20319	0.0707216	612	0.153378	0.0464013	0.0135314	612	0.00095273	-0.00852213	-0.00431006
612.2	0.760582	0.358522	0.135294	682.2	0.141177	0.061751	0.0248715	619.8	0.187142	0.0615233	0.0179847	612.2	0.325734	0.202771	0.0705692	612.2	0.152575	0.0458828	0.0130961	612.2	0.00125991	-0.00817008	-0.0043953
612.4	0.760441	0.358226	0.135307	682.4	0.141306	0.0620525	0.0248924	620	0.186736	0.0611008	0.017853	612.4	0.325205	0.201903	0.0700849	612.4	0.152003	0.0457414	0.0132755	612.4	0.00145777	-0.00782127	-0.00444682
612.6	0.759771	0.357738	0.134539	682.6	0.141431	0.0620048	0.0254166	620.2	0.186953	0.0606813	0.0176174	612.6	0.323972	0.200927	0.0692996	612.6	0.151707	0.0455292	0.0133061	612.6	0.00157081	-0.00707259	-0.00445639
612.8	0.759793	0.35799	0.134233	682.8	0.14158	0.061989	0.0256432	620.4	0.186024	0.0602869	0.0170785	612.8	0.32366	0.200305	0.0694704	612.8	0.151423	0.045666	0.013509	612.8	0.00192047	-0.00665739	-0.00440122
613	0.759338	0.357712	0.133687	683	0.141202	0.0616303	0.0260223	620.6	0.186028	0.0603062	0.0172093	613	0.323483	0.199661	0.0690403	613	0.151128	0.0455345	0.0137399	613	0.00222589	-0.00682597	-0.00489532
613.2	0.759417	0.357218	0.134227	683.2	0.140953	0.0612758	0.025801	620.8	0.185365	0.0598372	0.016998	613.2	0.323026	0.199447	0.0689413	613.2	0.151674	0.0460837	0.014172	613.2	0.00296678	-0.00634479	-0.00487952
613.4	0.759416	0.357528	0.134149	683.4	0.140605	0.0610402	0.0256662	621	0.184592	0.0599662	0.0170177	613.4	0.323099	0.199484	0.0693969	613.4	0.151803	0.0455348	0.0136287	613.4	0.00328962	-0.00588364	-0.00436637
613.6	0.75865	0.357275	0.133982	683.6	0.140483	0.0603709	0.0254168	621.2	0.184745	0.0604095	0.0171353	613.6	0.323033	0.199848	0.0696138	613.6	0.152075	0.0459754	0.0138424	613.6	0.0033756	-0.00582049	-0.00436267
613.8	0.758155	0.356813	0.134023	683.8	0.140032	0.0603316	0.0249379	621.4	0.184487	0.0605536	0.0175932	613.8	0.322335	0.200016	0.0695762	613.8	0.152526	0.0460046	0.014227	613.8	0.00377473	-0.00551224	-0.00387954
614	0.757849	0.357245	0.134302	684	0.140132	0.0606956	0.0250131	621.6	0.184196	0.0606235	0.0175273	614	0.322454	0.199951	0.0695085	614	0.15262	0.0456317	0.0141215	614	0.00394863	-0.00506775	-0.00379227
614.2	0.75752	0.356872	0.134103	684.2	0.140026	0.060424	0.0253335	621.8	0.184249	0.0603827	0.0167869	614.2	0.322662	0.199884	0.0695878	614.2	0.152801	0.0455867	0.0136499	614.2	0.00309087	-0.00546856	-0.00389123
614.4	0.757038	0.35676	0.133967	684.4	0.139177	0.0606555	0.0249781	622	0.183758	0.0596431	0.0164038	614.4	0.322542	0.199996	0.0697297	614.4	0.152667	0.0452577	0.0138514	614.4	0.0029432	-0.00506126	-0.0031417
614.6	0.757038	0.356814	0.134142	684.6	0.138705	0.0600768	0.024959	622.2	0.183475	0.059984	0.0160106	614.6	0.322582	0.199841	0.0696793	614.6	0.152679	0.0454903	0.0140434	614.6	0.00316467	-0.00470184	-0.00226494
614.8	0.757273	0.356604	0.134324	684.8	0.138669	0.0601219	0.0251136	622.4	0.1837	0.0604838	0.0160096	614.8	0.32216	0.200145	0.0696574	614.8	0.152528	0.0459783	0.0142132	614.8	0.00362752	-0.00450605	-0.00196074
615	0.757378	0.357009	0.135168	685	0.13872	0.0602678	0.0255923	622.6	0.18358	0.0602566	0.0158484	615	0.322766	0.20069	0.0701846	615	0.152631	0.0458398	0.0136807	615	0.00356155	-0.00498493	-0.00188685
615.2	0.757465	0.356861	0.135241	685.2	0.139095	0.0605352	0.0261765	622.8	0.18375	0.0606737	0.0162682	615.2	0.322302	0.200772	0.0700684	615.2	0.152093	0.0450036	0.0134542	615.2	0.00349784	-0.00525263	-0.0012337
615.4	0.7572	0.356456	0.134934	685.4	0.139482	0.0600193	0.0259903	623	0.184117	0.0616654	0.017342	615.4	0.323174	0.200992	0.0705881	615.4	0.152225	0.0453517	0.0135036	615.4	0.00354471	-0.00553669	-0.00122627
615.6	0.757347	0.356668	0.135013	685.6	0.139052	0.0602203	0.0259384	623.2	0.184049	0.0614024	0.0177613	615.6	0.322629	0.200761	0.0700922	615.6	0.152585	0.0459914	0.0138926	615.6	0.00349396	-0.00546243	-0.00062189
615.8	0.757286	0.356662	0.135221	685.8	0.139404	0.0599696	0.0257215	623.4	0.183883	0.0613343	0.0180428	615.8	0.322454	0.200848	0.0705083	615.8	0.151753	0.0452334	0.0130621	615.8	0.00327025	-0.00593453	-0.00098574
616	0.757045	0.356331	0.1347	686	0.139622	0.0601623	0.0259502	623.6	0.18355	0.0613156	0.0182963	616	0.322854	0.201235	0.0709009	616	0.15106	0.0452866	0.0129356	616	0.00258075	-0.00581561	-0.00123523
616.2	0.75675	0.355715	0.134362	686.2	0.139743	0.0603285	0.025955	623.8	0.18247	0.0604632	0.0180395	616.2	0.322714	0.200875	0.0711183	616.2	0.150128	0.0449954	0.0126439	616.2	0.00305861	-0.00509062	-0.00077738
616.4	0.756661	0.355346	0.133803	686.4	0.139434	0.0599505	0.0263209	624	0.181683	0.0608809	0.0179112	616.4	0.322044	0.200782	0.0706749	616.4	0.149445	0.045095	0.0125161	616.4	0.00251372	-0.00522803	-0.00103962
616.6	0.756061	0.355017	0.133001	686.6	0.139517	0.0597272	0.02653	624.2	0.181403	0.0604795	0.0171017	616.6	0.321694	0.200634	0.0706894	616.6	0.14921	0.045432	0.0126376	616.6	0.00268714	-0.00515502	-0.00110368
616.8	0.755617	0.354899	0.13313	686.8	0.139651	0.0599282	0.0265523	624.4	0.180244	0.0599391	0.0170182	616.8	0.321391	0.200181	0.0703186	616.8	0.148724	0.0453918	0.0125941	616.8	0.00297614	-0.0052081	-0.00128193
617	0.754845	0.353972	0.132708	687	0.139225	0.0596988	0.0258171	624.6	0.179994	0.059986	0.0171527	617	0.320732	0.199491	0.0696582	617	0.148745	0.0456965	0.012627	617	0.00263444	-0.00526815	-0.00199507
617.2	0.75431	0.353385	0.132997	687.2	0.139339	0.0593191	0.0259732	624.8	0.178821	0.0593948	0.0165975	617.2	0.320587	0.199501	0.0694156	617.2	0.149043	0.045903	0.0126513	617.2	0.00266099	-0.00546081	-0.0022415
617.4	0.754288	0.353604	0.132952	687.4	0.139281	0.0593501	0.0256623	625	0.178543	0.0598079	0.0167363	617.4	0.320504	0.199689	0.0693817	617.4	0.148382	0.0459246	0.0122347	617.4	0.00242137	-0.00571727	-0.00212105
617.6	0.754014	0.353263	0.132998	687.6	0.139712	0.0597695	0.0253475	625.2	0.178937	0.0599562	0.0166229	617.6	0.320072	0.199834	0.0693799	617.6	0.147997	0.0459425	0.0130181	617.6	0.0026138	-0.0057689	-0.00219307
617.8	0.753396	0.353429	0.132789	687.8	0.13958	0.0602203	0.024366	625.4	0.178876	0.0596778	0.0164279	617.8	0.319669	0.199636	0.0691079	617.8	0.147354	0.0455499	0.0124819	617.8	0.00223368	-0.00607326	-0.00269006
618	0.753202	0.353532	0.132861	688	0.139415	0.0602478	0.0240224	625.6	0.179447	0.0597973	0.0164693	618	0.319903	0.199391	0.069157	618	0.147258	0.0453298	0.0126072	618	0.00203142	-0.00651744	-0.00322806
618.2	0.753901	0.354253	0.133141	688.2	0.139364	0.0601558	0.0241404	625.8	0.179577	0.0592819	0.0159521	618.2	0.319071	0.198914	0.0686426	618.2	0.146615	0.0448217	0.012386	618.2	0.00185866	-0.00661038	-0.00274673
618.4	0.753722	0.354483	0.133367	688.4	0.138751	0.0600479	0.0232852	626	0.17918	0.058826	0.0154619	618.4	0.31904	0.198861	0.0687245	618.4	0.146975	0.0449555	0.0131691	618.4	0.00216282	-0.00654444	-0.00291363
618.6	0.754055	0.354536	0.133767	688.6	0.138487	0.0597298	0.023402	626.2	0.179004	0.059156	0.0150854	618.6	0.318827	0.198476	0.0685249	618.6	0.147026	0.0447661	0.0133965	618.6	0.00227411	-0.00690643	-0.00317714
618.8	0.754347	0.35532	0.134236	688.8	0.138506	0.0602088	0.0233411	626.4	0.179225	0.059342	0.015079	618.8	0.318576	0.198677	0.0684995	618.8	0.146807	0.0448572	0.0132145	618.8	0.00217915	-0.00806544	-0.0042108
619	0.754446	0.356027	0.134553	689	0.13888	0.0606728	0.0235743	626.6	0.179223	0.0590413	0.0151042	619	0.319167	0.198957	0.06867	619	0.14683	0.0447228	0.0134467	619	0.00229812	-0.00820722	-0.00428179
619.2	0.754484	0.356302	0.134614	689.2	0.139364	0.0606242	0.0240866	626.8	0.179253	0.0594356	0.0151324	619.2	0.318848	0.198917	0.0690548	619.2	0.146134	0.0446248	0.0132496	619.2	0.00254546	-0.00790341	-0.00412678
619.4	0.754524	0.356333	0.134568	689.4	0.139086	0.0603129	0.0238165	627	0.17886	0.058916	0.0150182	619.4	0.318939	0.197989	0.0692254	619.4	0.146185	0.0455094	0.0139427	619.4	0.00233223	-0.0080954	-0.00472007
619.6	0.754615	0.356298	0.134596	689.6	0.139173	0.0605979	0.0240995	627.2	0.178417	0.0581161	0.0148857	619.6	0.318888	0.198069	0.0694733	619.6	0.146209	0.0453739	0.0135617	619.6	0.00228845	-0.00773244	-0.0045927
619.8	0.754356	0.356629	0.134396	689.8	0.139161	0.060055	0.0237027	627.4	0.178069	0.0579317	0.014673	619.8	0.319328	0.197841	0.0696599	619.8	0.146005	0.0450931	0.0132586	619.8	0.00224944	-0.00807208	-0.00463274
620	0.754264	0.356617	0.134105	690	0.139414	0.0602947	0.0243376	627.6	0.178327	0.0584365	0.0148492	620	0.319746	0.197875	0.0698777	620	0.145996	0.0453303	0.0135451	620	0.00254756	-0.00732828	-0.00442304
620.2	0.753849	0.356099	0.133605	690.2	0.139357	0.0603349	0.0244824	627.8	0.177762	0.0577777	0.0141698	620.2	0.319257	0.197965	0.0693532	620.2	0.14581	0.0451452	0.0129254	620.2	0.00246353	-0.00699308	-0.00432435
620.4	0.753439	0.355669	0.133109	690.4	0.138601	0.0599006	0.0246126	628	0.176896	0.057486	0.0140119	620.4	0.318673	0.19792	0.069026	620.4	0.145554	0.0452449	0.0126358	620.4	0.0019016	-0.00715721	-0.00405948
620.6	0.752887	0.355393	0.132995	690.6	0.139047	0.0599473	0.0250818	628.2	0.176492	0.0569376	0.013515	620.6	0.318809	0.198027	0.0688095	620.6	0.145174	0.0454419	0.0123459	620.6	0.00213757	-0.00652935	-0.00361165
620.8	0.752258	0.354926	0.132755	690.8	0.138699	0.0597078	0.0251344	628.4	0.176423	0.0568177	0.0141342	620.8	0.318879	0.198303	0.0687997	620.8	0.144884	0.045223	0.01204	620.8	0.00195583	-0.00597171	-0.00313091
621	0.750916	0.354212	0.132528	691	0.138129	0.0592387	0.0248764	628.6	0.175863	0.0568945	0.0139264	621	0.31875	0.198497	0.068892	621	0.145028	0.045447	0.0115547	621	0.00166737	-0.00554607	-0.00336252
621.2	0.750498	0.354197	0.132698	691.2	0.138663	0.0590288	0.0255482	628.8	0.17574	0.0570977	0.0141968	621.2	0.318579	0.198581	0.06877	621.2	0.14462	0.0454017	0.0113984	621.2	0.0017713	-0.00585191	-0.00341403
621.4	0.750243	0.35401	0.132193	691.4	0.138741	0.0593524	0.0254457	629	0.17584	0.0577281	0.0147334	621.4	0.318132	0.1986	0.0691051	621.4	0.143865	0.0448534	0.0108846	621.4	0.0016514	-0.00527707	-0.00342315
621.6	0.749419	0.353722	0.131897	691.6	0.139055	0.0593875	0.0252595	629.2	0.176335	0.057944	0.0150643	621.6	0.317704	0.199087	0.0695662	621.6	0.143962	0.0444201	0.0105843	621.6	0.00144536	-0.00500118	-0.00356672
621.8	0.749119	0.353872	0.131658	691.8	0.139257	0.0591115	0.0247951	629.4	0.176165	0.0582501	0.0156799	621.8	0.317467	0.199122	0.0694194	621.8	0.143872	0.0438152	0.0103386	621.8	0.00158931	-0.00478079	-0.00363633
622	0.748858	0.353415	0.131771	692	0.138813	0.0585319	0.0250614	629.6	0.176521	0.0584733	0.0162544	622	0.316983	0.199314	0.0695657	622	0.143995	0.0428682	0.0108097	622	0.00150421	-0.00495423	-0.00330929
622.2	0.749607	0.354259	0.132187	692.2	0.139514	0.0587245	0.0254999	629.8	0.176655	0.0583833	0.016485	622.2	0.316504	0.199286	0.0693062	622.2	0.143918	0.0429216	0.011284	622.2	0.0013563	-0.00518552	-0.00299748
622.4	0.749129	0.353534	0.132099	692.4	0.139063	0.0590268	0.0252876	630	0.175923	0.0587054	0.0166785	622.4	0.316668	0.199234	0.0696327	622.4	0.145177	0.0429336	0.0119361	622.4	0.00183097	-0.00499158	-0.00338683
622.6	0.74966	0.353947	0.132344	692.6	0.138644	0.0588136	0.0252279	630.2	0.175567	0.058949	0.0171137	622.6	0.315639	0.198975	0.0689893	622.6	0.14546	0.0428699	0.0125845	622.6	0.00199008	-0.00513008	-0.00311607
622.8	0.749836	0.354429	0.132684	692.8	0.138222	0.0588711	0.02537	630.4	0.175123	0.0585972	0.0169661	622.8	0.31536	0.198641	0.0691075	622.8	0.145584	0.0434969	0.0127038	622.8	0.00234532	-0.00517003	-0.00309475
623	0.749668	0.354268	0.132283	693	0.138226	0.0594563	0.0255131	630.6	0.175017	0.0581776	0.0169899	623	0.31571	0.198445	0.0691674	623	0.145616	0.0433234	0.0127199	623	0.00266593	-0.00498659	-0.00245385
623.2	0.7501	0.354412	0.132542	693.2	0.137952	0.0598675	0.0255186	630.8	0.174761	0.0580606	0.0170502	623.2	0.315033	0.197753	0.0687484	623.2	0.145535	0.0432106	0.0122949	623.2	0.00284806	-0.00495615	-0.00223998
623.4	0.750401	0.354079	0.132745	693.4	0.137556	0.0599402	0.0251326	631	0.174568	0.0576427	0.017273	623.4	0.315352	0.197499	0.0682477	623.4	0.14565	0.0432882	0.0128244	623.4	0.00319207	-0.00514604	-0.00166157
623.6	0.750995	0.354365	0.133057	693.6	0.13741	0.0601833	0.024884	631.2	0.174739	0.0581585	0.0175774	623.6	0.315973	0.197752	0.0681104	623.6	0.145434	0.0430591	0.0122416	623.6	0.00325377	-0.00556906	-0.0014558
623.8	0.751325	0.354451	0.133278	693.8	0.137336	0.0604962	0.0249308	631.4	0.174453	0.0578294	0.0170755	623.8	0.316501	0.19783	0.0680766	623.8	0.145564	0.0436954	0.0127818	623.8	0.00313827	-0.00588965	-0.00149826
624	0.751666	0.353597	0.133205	694	0.13752	0.0609082	0.025546	631.6	0.174592	0.0580246	0.0170407	624	0.316663	0.19765	0.0680997	624	0.144815	0.04382	0.0123816	624	0.00317973	-0.00570727	-0.00234462
624.2	0.751392	0.352979	0.133203	694.2	0.137045	0.061102	0.0252987	631.8	0.173674	0.057379	0.016545	624.2	0.316437	0.197436	0.0679974	624.2	0.144319	0.0440562	0.0122061	624.2	0.00289399	-0.00605398	-0.00194959
624.4	0.751453	0.352718	0.133287	694.4	0.136048	0.0600931	0.0247628	632	0.173084	0.0569785	0.0158548	624.4	0.316674	0.19748	0.0685789	624.4	0.143412	0.0439489	0.0123278	624.4	0.0030197	-0.00582762	-0.00165878
624.6	0.7516	0.352728	0.133166	694.6	0.136765	0.0604023	0.0251412	632.2	0.173227	0.0574108	0.0154961	624.6	0.317193	0.197675	0.0693121	624.6	0.143027	0.0441223	0.012471	624.6	0.00291649	-0.00557421	-0.00199878
624.8	0.751682	0.35248	0.133145	694.8	0.136682	0.0601072	0.0244187	632.4	0.173415	0.0572821	0.0155137	624.8	0.316732	0.197634	0.0700259	624.8	0.142992	0.0442152	0.012372	624.8	0.00266766	-0.00565084	-0.00262477
625	0.751153	0.352109	0.133452	695	0.136792	0.0603152	0.0245174	632.6	0.172808	0.0571135	0.0151149	625	0.316558	0.197025	0.0700589	625	0.142575	0.044109	0.0121215	625	0.00231098	-0.00607868	-0.00409897
625.2	0.751254	0.352384	0.133184	695.2	0.137972	0.0607153	0.0252519	632.8	0.172825	0.0572086	0.0147808	625.2	0.316056	0.196645	0.0700532	625.2	0.141821	0.0440506	0.0121301	625.2	0.00244446	-0.00597518	-0.00421441
625.4	0.750941	0.352191	0.132964	695.4	0.137975	0.060475	0.0252447	633	0.172992	0.0573605	0.0143787	625.4	0.315707	0.196532	0.0706783	625.4	0.140873	0.0432224	0.0112489	625.4	0.00222561	-0.00584141	-0.00449221
625.6	0.750647	0.352167	0.133014	695.6	0.138378	0.0603798	0.0257795	633.2	0.173276	0.0575449	0.0146217	625.6	0.315157	0.196665	0.0706786	625.6	0.140518	0.0428686	0.0112575	625.6	0.00201882	-0.00589868	-0.00445379
625.8	0.750636	0.352319	0.132943	695.8	0.138691	0.059788	0.0256468	633.4	0.172759	0.0574226	0.0146728	625.8	0.314446	0.196249	0.0703151	625.8	0.140015	0.0421801	0.0116828	625.8	0.00201537	-0.00602877	-0.00469264
626	0.749658	0.352421	0.132245	696	0.138309	0.0592201	0.0255231	633.6	0.172823	0.0577088	0.0150007	626	0.313717	0.196022	0.070161	626	0.140529	0.0426912	0.0119302	626	0.00181567	-0.00628186	-0.0047075
626.2	0.749625	0.353095	0.132185	696.2	0.138495	0.0585043	0.0251076	633.8	0.173309	0.0580662	0.0151349	626.2	0.313003	0.195686	0.069939	626.2	0.140809	0.0430604	0.0122396	626.2	0.00230787	-0.00606613	-0.00442695
626.4	0.748665	0.353154	0.132073	696.4	0.138155	0.0580087	0.0246133	634	0.172529	0.0579866	0.0152686	626.4	0.312306	0.19526	0.0697022	626.4	0.141553	0.0423667	0.0127659	626.4	0.00278884	-0.0052769	-0.00402259
626.6	0.748238	0.353261	0.131683	696.6	0.138022	0.0577493	0.0240614	634.2	0.172448	0.0574859	0.0157264	626.6	0.311326	0.194706	0.069216	626.6	0.141953	0.0428462	0.0131368	626.6	0.00255386	-0.00492843	-0.00324488
626.8	0.748029	0.353042	0.131335	696.8	0.138061	0.0576384	0.0242585	634.4	0.17238	0.0569903	0.0154778	626.8	0.31113	0.194683	0.0691925	626.8	0.141959	0.0425335	0.0127101	626.8	0.00240181	-0.00452833	-0.00285555
627	0.747627	0.353287	0.130887	697	0.137855	0.0578165	0.0239366	634.6	0.172526	0.0569678	0.0164143	627	0.311042	0.194799	0.0689357	627	0.141975	0.0420001	0.0126267	627	0.00239653	-0.0047679	-0.00235882
627.2	0.748011	0.354058	0.131524	697.2	0.137499	0.0577472	0.0236809	634.8	0.172411	0.0566889	0.0165366	627.2	0.311216	0.19547	0.068957	627.2	0.141764	0.0419079	0.0127056	627.2	0.00262098	-0.00417241	-0.0017244
627.4	0.747701	0.353912	0.13152	697.4	0.137314	0.0568952	0.0233146	635	0.171905	0.0561853	0.016531	627.4	0.311875	0.195925	0.0687424	627.4	0.141315	0.0422311	0.0126058	627.4	0.00289851	-0.00426605	-0.00101258
627.6	0.747611	0.353721	0.131143	697.6	0.136976	0.0565445	0.0231199	635.2	0.171606	0.0560352	0.0161659	627.6	0.311966	0.196376	0.0691101	627.6	0.141402	0.0425453	0.0129643	627.6	0.00218498	-0.00484802	-0.00115356
627.8	0.747224	0.353436	0.130863	697.8	0.136866	0.0564371	0.0231149	635.4	0.171323	0.0552178	0.0157444	627.8	0.312199	0.196734	0.0694394	627.8	0.141443	0.0429556	0.0137813	627.8	0.0019087	-0.00445378	-0.00117505
628	0.746827	0.352647	0.130717	698	0.136734	0.0564444	0.0231817	635.6	0.171198	0.0549907	0.0158032	628	0.31237	0.196757	0.0694325	628	0.141056	0.0429004	0.0137408	628	0.00178758	-0.00478438	-0.00154061
628.2	0.746543	0.352569	0.130628	698.2	0.136925	0.0562443	0.0224935	635.8	0.170539	0.0544022	0.0155204	628.2	0.312386	0.196797	0.0696726	628.2	0.1407	0.0427193	0.0141703	628.2	0.00196195	-0.00498584	-0.00091473
628.4	0.747127	0.352774	0.130589	698.4	0.137128	0.056141	0.0223212	636	0.170508	0.0543536	0.0154208	628.4	0.312567	0.197213	0.070065	628.4	0.140249	0.0424816	0.0138847	628.4	0.00216827	-0.00529209	-0.00141065
628.6	0.747161	0.35259	0.130324	698.6	0.137703	0.0567298	0.022481	636.2	0.169967	0.0540716	0.0154065	628.6	0.312747	0.197343	0.0705168	628.6	0.139942	0.0427672	0.0139541	628.6	0.00208462	-0.00577219	-0.00133588
[truncated: 1,056 more rows]
