# Supplementary material for: Design of amyloidogenic peptide traps
Source: Nat Chem Biol. 2024 Mar 19;20(8):981–90. doi: 10.1038/s41589-024-01578-5 (PMC11288891; doi:10.1038/s41589-024-01578-5)
Supplement: Supplementary file 10 — Statistical source data. [file 41589_2024_1578_MOESM10_ESM.xlsx]

## Sheet: Fig. 6a
2 uM Ab control						DAm_012 0.1 uM						DAm_012 0.25 uM						DAm_012 0.5 uM						Dam_012 1 uM						Fits
time / h	relative aggregate conc	time / h	relative aggregate conc	time / h	relative aggregate conc	time / h	relative aggregate conc	time / h	relative aggregate conc	time / h	relative aggregate conc	time / h	relative aggregate conc	time / h	relative aggregate conc	time / h	relative aggregate conc	time / h	relative aggregate conc	time / h	relative aggregate conc	time / h	relative aggregate conc	time / h	relative aggregate conc	time / h	relative aggregate conc	time / h	relative aggregate conc	time / h	2 uM Ab control	DAm_012 0.1 uM	DAm_012 0.25 uM	DAm_012 0.5 uM	Dam_012 1 uM
0.229168	-0.00601208	0.229168	0.00204093	0.275002	-0.00750564	0.045833	0.0121234	0.366669	-0.0074071	0.275002	-0.00772799	0.366669	-0.00658703	0.50417	0.0144476	0.412503	-0.00726088	0.50417	-0.00145292	0.87084	0.00892587	0.779172	-0.00330148	1.46668	0.00815604	1.46668	0.00289288	1.37501	-0.000613025	0.045833	5.37209e-06	4.82651e-06	4.05199e-06	3.00357e-06	1.43643e-06
0.275002	0.00647813	0.275002	-0.00324184	0.320835	0.00720518	0.0916667	-0.00705926	0.412503	0.00109033	0.320835	0.00196747	0.412503	-0.010801	0.550004	-0.000686424	0.458336	0.0119073	0.550004	-0.00409599	0.916673	-0.00366793	0.825006	0.0140115	1.51251	0.0221762	1.51251	0.021116	1.42084	0.0120717	0.136899	6.07445e-05	5.15727e-05	3.82192e-05	2.70839e-05	1.28338e-05
0.320835	-0.000466053	0.320835	0.00120091	0.366669	0.000300459	0.1375	-0.0050641	0.458336	0.00631678	0.366669	0.00576052	0.458336	0.0173881	0.595837	-0.0137612	0.50417	-0.00464644	0.595837	0.0055489	0.962507	-0.00525793	0.87084	-0.01071	1.55835	0.0212119	1.55835	-0.0105601	1.46668	0.0184197	0.227965	0.000262457	0.000201419	0.000118225	7.67189e-05	3.56941e-05
0.366669	-0.00710264	0.366669	-0.0111287	0.412503	0.0066276	0.183334	-0.00320403	0.50417	-0.010927	0.412503	-0.0144817	0.50417	-0.0303067	0.641671	0.0172096	0.550004	-0.0206615	0.641671	-0.0177866	1.00834	0.0113109	0.916673	0.0161508	1.60418	-0.00279786	1.60418	0.0107181	1.51251	-0.0134576	0.319031	0.000941878	0.000635218	0.000271638	0.000155114	7.02281e-05
0.412503	0.00621714	0.412503	-0.0251943	0.458336	-0.00436395	0.229168	-0.00257015	0.550004	0.0028147	0.458336	0.00229853	0.550004	-0.013339	0.687505	-0.0233221	0.595837	-0.0110183	0.687505	-0.0235596	1.05417	0.00752515	0.962507	0.00458245	1.65001	-0.000901782	1.65001	-0.0100062	1.55835	-0.00433509	0.410098	0.00320892	0.00187478	0.000551268	0.000267335	0.000116756
0.458336	-0.00507997	0.458336	0.00517699	0.50417	0.0160527	0.275002	-0.00729826	0.595837	0.00539237	0.50417	0.00293228	0.595837	-0.00411291	0.733339	-0.0249891	0.641671	-0.00980963	0.733339	-0.00489586	1.10001	0.0501144	1.00834	-0.00343354	1.69585	-0.00773849	1.69585	-0.00637946	1.60418	0.00391967	0.501164	0.0106985	0.00539689	0.00105318	0.000420624	0.000175711
0.50417	-0.0026565	0.50417	-0.00213115	0.550004	0.0193956	0.320835	-0.0230205	0.641671	0.0185296	0.550004	-0.011067	0.641671	-0.0108808	0.779172	0.0149869	0.687505	-0.0206484	0.779172	-0.0213223	1.14584	0.00930444	1.05417	0.0152792	1.74168	0.000582574	1.74168	-0.00234179	1.65001	-0.00681266	0.59223	0.0346972	0.015284	0.00194921	0.00062487	0.000247643
0.550004	0.00656202	0.550004	-0.00706859	0.595837	0.0586537	0.366669	-0.0208487	0.687505	0.0236138	0.595837	-0.0240826	0.687505	-0.0197239	0.825006	0.0110482	0.733339	-0.0279531	0.825006	0.00237258	1.19168	0.035022	1.10001	0.0406742	1.78751	-0.0067742	1.78751	-0.0177242	1.69585	-0.000327591	0.683296	0.104766	0.0421373	0.00354411	0.000893227	0.000333222
0.595837	0.0484788	0.595837	0.00467298	0.641671	0.105945	0.412503	-0.000813997	0.733339	0.0432752	0.641671	-0.00554296	0.733339	0.020804	0.87084	0.0272935	0.779172	0.0162428	0.87084	-0.00844314	1.23751	0.0158285	1.14584	0.0145793	1.83335	-0.0235247	1.83335	-0.00648665	1.74168	-0.0193946	0.774362	0.265755	0.109084	0.0063742	0.00124294	0.000433245
0.641671	0.0881306	0.641671	0.0349603	0.687505	0.205981	0.458336	-0.0186457	0.779172	0.0862335	0.687505	0.0176694	0.779172	-0.000585278	0.916673	-0.00119307	0.825006	-3.50344e-05	0.916673	-0.01752	1.28334	0.0301763	1.19168	0.0280229	1.87918	0.00264117	1.87918	0.0287268	1.78751	0.00687677	0.865428	0.504043	0.2467	0.0113718	0.00169644	0.000548646
0.687505	0.132284	0.687505	0.0671889	0.733339	0.265848	0.50417	0.00116038	0.825006	0.114437	0.733339	0.0172343	0.825006	0.0111788	0.962507	0.0484419	0.87084	0.00205389	0.962507	-0.0194443	1.32918	0.0235513	1.23751	0.086261	1.92501	-0.0178473	1.92501	0.00682335	1.83335	-3.07391e-05	0.956495	0.717533	0.449424	0.020124	0.00228271	0.0006805
0.733339	0.172029	0.733339	0.126317	0.779172	0.374442	0.550004	0.00997232	0.87084	0.184638	0.779172	0.0332578	0.87084	0.0553939	1.00834	0.0629059	0.916673	0.0152443	1.00834	-0.0106457	1.37501	0.0273749	1.28334	0.0861025	1.97085	-0.00272201	1.97085	0.00771664	1.87918	0.00460471	1.04756	0.852609	0.650593	0.035233	0.00303903	0.000830035
0.779172	0.266862	0.779172	0.231478	0.825006	0.464238	0.595837	0.037333	0.916673	0.242947	0.825006	0.0497448	0.916673	0.056607	1.05417	0.0781053	0.962507	0.0439244	1.05417	-0.0124889	1.42084	0.0318547	1.32918	0.0287493	2.01668	0.00753846	2.01668	-0.0244954	1.92501	-0.000921294	1.13863	0.925539	0.796874	0.0606869	0.00401326	0.000998641
0.825006	0.350863	0.825006	0.350135	0.87084	0.596583	0.641671	0.0641533	0.962507	0.286705	0.87084	0.101627	0.962507	0.103216	1.10001	0.0851002	1.00834	0.0352402	1.10001	-0.0150044	1.46668	0.0619385	1.37501	0.0830784	2.06252	0.00255449	2.06252	0.0181324	1.97085	-0.000110661	1.22969	0.96277	0.886538	0.101883	0.00526657	0.00118788
0.87084	0.466239	0.87084	0.459766	0.916673	0.664361	0.687505	0.119436	1.00834	0.382941	0.916673	0.174291	1.00834	0.131549	1.14584	0.15608	1.05417	0.0654837	1.14584	-0.0059044	1.51251	0.0640837	1.42084	0.0941846	2.10835	-0.00149769	2.10835	0.00939603	2.01668	-0.00371855	1.32076	0.981444	0.937599	0.164524	0.00687694	0.00139952
0.916673	0.551014	0.916673	0.619827	0.962507	0.778328	0.733339	0.276139	1.05417	0.464333	0.962507	0.232738	1.05417	0.182197	1.19168	0.139883	1.10001	0.089329	1.19168	0.0102438	1.55835	0.0634023	1.46668	0.0767131	2.15418	-0.00947204	2.15418	-0.0343394	2.06252	0.0133961	1.41183	0.99076	0.965874	0.251626	0.00894331	0.00163552
0.962507	0.665635	0.962507	0.716317	1.00834	0.826635	0.779172	0.464983	1.10001	0.520527	1.00834	0.288508	1.10001	0.174088	1.23751	0.229347	1.14584	0.101495	1.23751	0.0256038	1.60418	0.0712639	1.51251	0.0983444	2.20002	-0.0142718	2.20002	0.0225631	2.10835	0.00705945	1.50289	0.995401	0.981375	0.359629	0.0115906	0.00189805
1.00834	0.769518	1.00834	0.777507	1.05417	0.866112	0.825006	0.640702	1.14584	0.620558	1.05417	0.398819	1.14584	0.225231	1.28334	0.266251	1.19168	0.116761	1.28334	0.0133042	1.65001	0.0583042	1.55835	0.118774	2.24585	0.00402801	2.24585	-0.00126984	2.15418	0.0146177	1.59396	0.997711	0.989842	0.477479	0.0149758	0.00218954
1.05417	0.835017	1.05417	0.864459	1.10001	0.937487	0.87084	0.805614	1.19168	0.715701	1.10001	0.465353	1.19168	0.227769	1.32918	0.251362	1.23751	0.128454	1.32918	0.0258704	1.69585	0.0716299	1.60418	0.110956	2.29168	-0.00530068	2.29168	0.0142019	2.20002	0.0156681	1.68502	0.99886	0.994461	0.591234	0.019294	0.00251267
1.10001	0.903788	1.10001	0.892356	1.14584	0.961658	0.916673	0.892185	1.23751	0.755486	1.14584	0.561523	1.23751	0.266812	1.37501	0.315968	1.28334	0.169615	1.37501	0.0257777	1.74168	0.0739518	1.65001	0.147259	2.33752	-0.00176856	2.33752	0.0105573	2.24585	-0.00523706	1.77609	0.999433	0.99698	0.690422	0.024786	0.00287042
1.14584	0.965876	1.14584	0.948675	1.19168	0.959313	0.962507	0.954191	1.28334	0.843073	1.19168	0.655876	1.28334	0.297683	1.42084	0.346857	1.32918	0.179823	1.42084	0.0406044	1.78751	0.0826084	1.69585	0.119157	2.38335	0.021071	2.38335	0.00752012	2.29168	0.0107701	1.86716	0.999718	0.998353	0.770709	0.0317443	0.00326606
1.19168	0.952369	1.19168	0.974585	1.23751	1.00038	1.00834	0.975753	1.32918	0.867037	1.23751	0.704211	1.32918	0.393663	1.46668	0.383744	1.37501	0.192396	1.46668	0.0689594	1.83335	0.109197	1.74168	0.149597	2.42919	0.00429888	2.42919	-0.00655812	2.33752	0.0295973	1.95822	0.999859	0.999102	0.832563	0.0405183	0.00370321
1.23751	1.00189	1.23751	1.00681	1.28334	1.00661	1.05417	0.984181	1.37501	0.920403	1.28334	0.767728	1.37501	0.36897	1.51251	0.451553	1.42084	0.233452	1.51251	0.0557556	1.87918	0.116579	1.78751	0.16131	2.47502	0.0162387	2.47502	-0.000555214	2.38335	0.035717	2.04929	0.99993	0.999511	0.878771	0.0515162	0.00418583
1.28334	0.989784	1.28334	0.984245	1.32918	0.975345	1.10001	1.03596	1.42084	0.975023	1.32918	0.824795	1.42084	0.444854	1.55835	0.486773	1.46668	0.267308	1.55835	0.0626879	1.92501	0.127356	1.83335	0.168428	2.52085	0.0250149	2.52085	0.010593	2.42919	0.0482076	2.14035	0.999965	0.999733	0.912666	0.0651995	0.00471831
1.32918	1.02219	1.32918	0.979242	1.37501	1.00104	1.14584	1.00638	1.46668	0.940171	1.37501	0.866868	1.46668	0.448573	1.60418	0.568539	1.51251	0.304922	1.60418	0.082453	1.97085	0.113311	1.87918	0.191076	2.56669	0.0185682	2.56669	-0.00918439	2.47502	0.0518726	2.23142	0.999983	0.999855	0.937264	0.0820693	0.00530546
1.37501	1.04338	1.37501	1.04243	1.42084	1.0212	1.19168	0.994042	1.51251	0.985938	1.42084	0.909188	1.51251	0.546309	1.65001	0.578231	1.55835	0.322592	1.65001	0.0846439	2.01668	0.147697	1.92501	0.212193	2.61252	0.0121107	2.61252	0.0101643	2.52085	0.0422592	2.32249	0.999991	0.999921	0.955007	0.102638	0.00595255
1.42084	1.05808	1.42084	0.988221	1.46668	1.01823	1.23751	0.996536	1.55835	0.977414	1.46668	0.914078	1.55835	0.510729	1.69585	0.616474	1.60418	0.394036	1.69585	0.0968044	2.06252	0.175371	1.97085	0.225174	2.65835	0.0213311	2.65835	0.00994987	2.56669	0.0638038	2.41355	0.999996	0.999957	0.967762	0.127384	0.00666536
1.46668	1.00795	1.46668	1.02245	1.51251	0.995298	1.28334	0.995622	1.60418	0.987601	1.51251	0.91945	1.60418	0.591019	1.74168	0.650158	1.65001	0.369508	1.74168	0.0981259	2.10835	0.152556	2.01668	0.19756	2.70419	0.0158487	2.70419	0.0162922	2.61252	0.0410946	2.50462	0.999998	0.999976	0.976913	0.156693	0.00745023
1.51251	0.994631	1.51251	1.02387	1.55835	0.998326	1.32918	1.00784	1.65001	0.982401	1.55835	0.97768	1.65001	0.610844	1.78751	0.706608	1.69585	0.443461	1.78751	0.102925	2.15418	0.162399	2.06252	0.232094	2.75002	0.0251557	2.75002	-0.0314809	2.65835	0.0547612	2.59569	0.999999	0.999987	0.983471	0.190779	0.00831409
1.55835	0.997418	1.55835	1.00364	1.60418	1.00929			1.69585	1.00597	1.60418	0.953493	1.69585	0.630254	1.83335	0.74611	1.74168	0.435132	1.83335	0.127745	2.20002	0.209771	2.10835	0.237403	2.79585	0.0366513	2.79585	-0.0189748	2.70419	0.0662813	2.68675	0.999999	0.999993	0.988169	0.229617	0.00926452
		1.60418	1.01438	1.65001	0.992384			1.74168	1.02976	1.65001	0.98817	1.74168	0.696129	1.87918	0.79161	1.78751	0.507587	1.87918	0.14431	2.24585	0.210931	2.15418	0.217224	2.84169	0.0302155	2.84169	-0.00160929	2.75002	0.0626164	2.77782	1	0.999996	0.991532	0.272881	0.0103098
		1.65001	0.991404					1.78751	1.00614	1.69585	1.00735	1.78751	0.73953	1.92501	0.821453	1.83335	0.538225	1.92501	0.144507	2.29168	0.219676	2.20002	0.212061	2.88752	0.0513649	2.88752	0.020848	2.79585	0.0604471	2.86888	1	0.999998	0.993939	0.319922	0.0114589
		1.69585	0.994213					1.83335	0.97505	1.74168	0.985947	1.83335	0.760664	1.97085	0.863358	1.87918	0.555409	1.97085	0.151439	2.33752	0.221342	2.24585	0.271183	2.93336	0.0400643	2.93336	0.0192579	2.84169	0.0611093	2.95995	1	0.999999	0.995662	0.369802	0.0127217
								1.87918	1.0012	1.78751	0.98607	1.87918	0.769268	2.01668	0.928503	1.92501	0.61269	2.01668	0.165176	2.38335	0.229368	2.29168	0.274062	2.97919	0.0632397	2.97919	-0.016152	2.88752	0.0726865	3.05102	1	0.999999	0.996896	0.421374	0.0141088
								1.92501	1.01999	1.83335	0.96561	1.92501	0.843316	2.06252	0.939633	1.97085	0.598725	2.06252	0.145423	2.42919	0.237343	2.33752	0.313469	3.02502	0.021071	3.02502	0.0237422	2.93336	0.0912626	3.14208	1	1	0.997778	0.473396	0.0156319
								1.97085	1.02139	1.87918	1.00188	1.97085	0.844226	2.10835	0.959588	2.01668	0.656269	2.10835	0.170671	2.47502	0.25029	2.38335	0.308556	3.07086	0.0618312	3.07086	0.0147022	2.97919	0.0891732	3.23315	1	1	0.99841	0.524665	0.0173036
								2.01668	1.01566	1.92501	1.00723	2.01668	0.862646	2.15418	0.959523	2.06252	0.687576	2.15418	0.171807	2.52085	0.265446	2.42919	0.329712	3.11669	0.0536402	3.11669	0.022849	3.02502	0.0668065	3.32421	1	1	0.998862	0.574123	0.0191373
								2.06252	1.01235	1.97085	1.00671	2.06252	0.886078	2.20002	0.966567	2.10835	0.729118	2.20002	0.187445	2.56669	0.273535	2.47502	0.352836	3.16252	0.0581799	3.16252	0.0358374	3.07086	0.101938	3.41528	1	1	0.999186	0.62093	0.0211479
								2.10835	0.983103	2.01668	1.02155	2.10835	0.908745	2.24585	1.04407	2.15418	0.726951	2.24585	0.222733	2.61252	0.273964	2.52085	0.324865	3.20836	0.05896	3.20836	0.0421261	3.11669	0.0946078	3.50635	1	1	0.999417	0.664496	0.023351
								2.15418	1.02528	2.06252	1.02013	2.15418	0.916774	2.29168	1.03395	2.20002	0.766154	2.29168	0.232714	2.65835	0.277749	2.56669	0.361248	3.25419	0.0522425	3.25419	0.0223666	3.16252	0.105043	3.59741	1	1	0.999583	0.704473	0.0257639
								2.20002	0.97633	2.10835	1.00325	2.20002	0.947676	2.33752	1.06155	2.24585	0.80072	2.33752	0.23931	2.70419	0.293939	2.61252	0.386114	3.30003	0.0715175	3.30003	0.0245283	3.20836	0.109508	3.68848	1	1	0.999701	0.740719	0.0284046
								2.24585	1.0233	2.15418	1.01307	2.24585	0.912033	2.38335	1.03312	2.29168	0.820401	2.38335	0.25234	2.75002	0.31119	2.65835	0.368577	3.34586	0.0816154	3.34586	0.0351406	3.25419	0.108115	3.77955	1	1	0.999786	0.773261	0.0312927
								2.29168	1.00037	2.20002	0.984122	2.29168	0.896837	2.42919	1.01313	2.33752	0.828349	2.42919	0.267375	2.79585	0.343671	2.70419	0.38585	3.39169	0.0797085	3.39169	0.0161314	3.30003	0.102463	3.87061	1	1	0.999847	0.802242	0.034449
										2.24585	1.01709	2.33752	0.957541	2.47502	1.03253	2.38335	0.825117	2.47502	0.268453	2.84169	0.353034	2.75002	0.421797	3.43753	0.0729368	3.43753	0.069693	3.34586	0.119144	3.96168	1	1	0.999891	0.827885	0.0378954
										2.29168	0.986042	2.38335	0.976057	2.52085	1.05028	2.42919	0.896627	2.52085	0.255852	2.88752	0.3666	2.79585	0.421718	3.48336	0.0791884	3.48336	0.0519523	3.39169	0.135048	4.05274	1	1	0.999922	0.850456	0.0416554
										2.33752	1.01711	2.42919	0.954636	2.56669	1.0584	2.47502	0.893697	2.56669	0.26035	2.93336	0.371862	2.84169	0.456119	3.52919	0.0964481	3.52919	0.0219735	3.43753	0.136053	4.14381	1	1	0.999944	0.870242	0.0457533
										2.38335	0.997061	2.47502	1.02316	2.61252	1.09135	2.52085	0.925806	2.61252	0.30621	2.97919	0.391825	2.88752	0.438066	3.57503	0.0939345	3.57503	0.0547394	3.48336	0.146591	4.23488	1	1	0.99996	0.887529	0.050215
										2.42919	0.99743	2.52085	0.988044	2.65835	1.05747	2.56669	0.937262	2.65835	0.350029	3.02502	0.417581	2.93336	0.49229	3.62086	0.101616	3.62086	0.0567939	3.52919	0.148053	4.32594	1	1	0.999971	0.902594	0.055067
										2.47502	1.02718	2.56669	1.03073	2.70419	1.04979	2.61252	0.919762	2.70419	0.344186	3.07086	0.406665	2.97919	0.446597	3.6667	0.100999	3.6667	0.0936511	3.57503	0.158716	4.41701	1	1	0.999979	0.915697	0.0603371
										2.52085	1.02469	2.61252	0.970151	2.75002	1.09713	2.65835	0.915112	2.75002	0.34938	3.11669	0.414237	3.02502	0.481395	3.71253	0.096914	3.71253	0.0612425	3.62086	0.134352	4.50808	1	1	0.999985	0.927074	0.0660535
										2.56669	1.00229	2.65835	0.972417	2.79585	1.04029	2.70419	0.934635	2.79585	0.389687	3.16252	0.453053	3.07086	0.514872	3.75836	0.103686	3.75836	0.0933652	3.6667	0.126257	4.59914	1	1	0.999989	0.936941	0.072245
										2.61252	1.00812	2.70419	0.976568	2.84169	1.01367	2.75002	0.991509	2.84169	0.379207	3.20836	0.490834	3.11669	0.515123	3.8042	0.113675	3.8042	0.0674777	3.71253	0.164322	4.69021	1	1	0.999992	0.94549	0.0789409
										2.65835	0.989589	2.75002	1.04923	2.88752	0.985721	2.79585	0.959623	2.88752	0.393999	3.25419	0.485926	3.16252	0.549485	3.85003	0.123221	3.85003	0.0495047	3.75836	0.16471	4.78127	1	1	0.999995	0.952891	0.0861699
												2.79585	0.980702	2.93336	1.0526	2.84169	0.980368	2.93336	0.379439	3.30003	0.47024	3.20836	0.543252	3.89586	0.120783	3.89586	0.08713	3.8042	0.166731	4.87234	1	1	0.999996	0.959295	0.0939604
												2.84169	0.994477	2.97919	0.992128	2.88752	0.999181	2.97919	0.412906	3.34586	0.491781	3.25419	0.557223	3.9417	0.120945	3.9417	0.0525776	3.85003	0.19838	4.96341	1	1	0.999997	0.964833	0.10234
												2.88752	1.00696	3.02502	1.00676	2.93336	0.968044	3.02502	0.446061	3.39169	0.515908	3.30003	0.599707	3.98753	0.123546	3.98753	0.0905781	3.89586	0.193277	5.05447	1	1	0.999998	0.969622	0.111335
												2.93336	1.02844	3.07086	1.00112	2.97919	0.947326	3.07086	0.420882	3.43753	0.526004	3.34586	0.573757	4.03336	0.113795	4.03336	0.0892382	3.9417	0.220324	5.14554	1	1	0.999999	0.973761	0.120968
												2.97919	0.95031			3.02502	0.988316	3.11669	0.435025	3.48336	0.551343	3.39169	0.587373	4.0792	0.121801	4.0792	0.0720871	3.98753	0.206338	5.2366	1	1	0.999999	0.977337	0.131262
												3.02502	1.01483			3.07086	0.979816	3.16252	0.455775	3.52919	0.568669	3.43753	0.636432	4.12503	0.118183	4.12503	0.0896491	4.03336	0.196759	5.32767	1	1	0.999999	0.980427	0.142235
												3.07086	1.03486			3.11669	0.993939	3.20836	0.460887	3.57503	0.585036	3.48336	0.634795	4.17087	0.134619	4.17087	0.0910605	4.0792	0.216557	5.41874	1	1	0.999999	0.983096	0.1539
																3.16252	1.03607	3.25419	0.477267	3.62086	0.616949	3.52919	0.643418	4.2167	0.135301	4.2167	0.113571	4.12503	0.211487	5.5098	1	1	1	0.985402	0.166267
																3.20836	1.00047	3.30003	0.515916	3.6667	0.620116	3.57503	0.689018	4.26253	0.129451	4.26253	0.0872551	4.17087	0.200983	5.60087	1	1	1	0.987394	0.179342
																3.25419	0.999733	3.34586	0.492059	3.71253	0.629518	3.62086	0.691052	4.30837	0.155465	4.30837	0.0918109	4.2167	0.210665	5.69194	1	1	1	0.989114	0.193122
																3.30003	1.01014	3.39169	0.558901	3.75836	0.624685	3.6667	0.675245	4.3542	0.159235	4.3542	0.0929007	4.26253	0.247224	5.783	1	1	1	0.990599	0.2076
																3.34586	1.04674	3.43753	0.528193	3.8042	0.680309	3.71253	0.707665	4.40003	0.16046	4.40003	0.0971349	4.30837	0.232667	5.87407	1	1	1	0.991882	0.222763
																3.39169	1.00373	3.48336	0.578446	3.85003	0.681723	3.75836	0.755801	4.44587	0.171381	4.44587	0.134492	4.3542	0.234368	5.96513	1	1	1	0.99299	0.238588
																3.43753	0.983363	3.52919	0.584485	3.89586	0.681079	3.8042	0.735952	4.4917	0.160449	4.4917	0.154645	4.40003	0.248149	6.0562	1	1	1	0.993947	0.255049
																3.48336	0.978292	3.57503	0.61109	3.9417	0.728161	3.85003	0.747296	4.53754	0.181967	4.53754	0.150875	4.44587	0.25879	6.14727	1	1	1	0.994773	0.27211
																3.52919	1.01806	3.62086	0.586595	3.98753	0.712513	3.89586	0.771608	4.58337	0.182075	4.58337	0.169063	4.4917	0.275973	6.23833	1	1	1	0.995486	0.289729
																3.57503	0.995962	3.6667	0.621604	4.03336	0.763216	3.9417	0.779188	4.6292	0.190667	4.6292	0.143765	4.53754	0.283554	6.3294	1	1	1	0.996103	0.307858
																3.62086	1.01337	3.71253	0.620341	4.0792	0.781993	3.98753	0.784973	4.67504	0.182985	4.67504	0.173422	4.58337	0.276544	6.42046	1	1	1	0.996635	0.326442
																3.6667	0.990668	3.75836	0.641775	4.12503	0.783369	4.03336	0.822741	4.72087	0.173331	4.72087	0.171474	4.6292	0.288726	6.51153	1	1	1	0.997094	0.345423
																		3.8042	0.663001	4.17087	0.797086	4.0792	0.830031	4.7667	0.207742	4.7667	0.174583	4.67504	0.297083	6.6026	1	1	1	0.997491	0.364736
																		3.85003	0.693953	4.2167	0.809768	4.12503	0.854964	4.81254	0.18876	4.81254	0.183838	4.72087	0.28312	6.69366	1	1	1	0.997833	0.384315
																		3.89586	0.666038	4.26253	0.815636	4.17087	0.828592	4.85837	0.186961	4.85837	0.192985	4.7667	0.296273	6.78473	1	1	1	0.998129	0.40409
																		3.9417	0.720963	4.30837	0.83989	4.2167	0.878246	4.90421	0.200591	4.90421	0.18457	4.81254	0.322247	6.8758	1	1	1	0.998384	0.423991
																		3.98753	0.718459	4.3542	0.862995	4.26253	0.886315	4.95004	0.20888	4.95004	0.191359	4.85837	0.297826	6.96686	1	1	1	0.998605	0.443947
																		4.03336	0.727443	4.40003	0.910468	4.30837	0.893657	4.99587	0.217288	4.99587	0.187768	4.90421	0.304824	7.05793	1	1	1	0.998795	0.463889
																		4.0792	0.77081	4.44587	0.887526	4.3542	0.897394	5.04171	0.227321	5.04171	0.185481	4.95004	0.330662	7.14899	1	1	1	0.99896	0.48375
																		4.12503	0.765999	4.4917	0.921194	4.40003	0.893248	5.08754	0.221362	5.08754	0.218461	4.99587	0.350894	7.24006	1	1	1	0.999102	0.503464
																		4.17087	0.76484	4.53754	0.892044	4.44587	0.90199	5.13337	0.234732	5.13337	0.213691	5.04171	0.315682	7.33113	1	1	1	0.999224	0.522971
																		4.2167	0.801368	4.58337	0.929031	4.4917	0.917415	5.17921	0.2264	5.17921	0.224536	5.08754	0.358418	7.42219	1	1	1	0.99933	0.542213
																		4.26253	0.84921	4.6292	0.987293	4.53754	0.96242	5.22504	0.239629	5.22504	0.253157	5.13337	0.351544	7.51326	1	1	1	0.999422	0.56114
																		4.30837	0.857313	4.67504	0.964843	4.58337	0.960123	5.27087	0.237798	5.27087	0.20642	5.17921	0.372176	7.60432	1	1	1	0.999501	0.579704
																		4.3542	0.878307	4.72087	0.962143	4.6292	0.968561	5.31671	0.261168	5.31671	0.225143	5.22504	0.383319	7.69539	1	1	1	0.999569	0.597864
																		4.40003	0.894559	4.7667	0.954584	4.67504	1.00762	5.36254	0.23212	5.36254	0.256015	5.27087	0.350791	7.78646	1	1	1	0.999628	0.615584
																		4.44587	0.915924	4.81254	1.00599	4.72087	1.00992	5.40838	0.28313	5.40838	0.237167	5.31671	0.390786	7.87752	1	1	1	0.999678	0.632834
																		4.4917	0.90985	4.85837	1.01571	4.7667	0.976775	5.45421	0.275297	5.45421	0.284315	5.36254	0.393423	7.96859	1	1	1	0.999722	0.649588
																		4.53754	0.910441	4.90421	1.01097	4.81254	1.02663	5.50004	0.26833	5.50004	0.228698	5.40838	0.400525	8.05966	1	1	1	0.99976	0.665828
																		4.58337	0.945879	4.95004	0.985942	4.85837	1.01258	5.54588	0.258926	5.54588	0.241222	5.45421	0.388742	8.15072	1	1	1	0.999793	0.681536
																		4.6292	0.953739	4.99587	1.02145	4.90421	0.979535	5.59171	0.278092	5.59171	0.273881	5.50004	0.406587	8.24179	1	1	1	0.999821	0.696704
																		4.67504	0.940767	5.04171	1.0169	4.95004	1.0348	5.63754	0.260356	5.63754	0.275632	5.54588	0.429091	8.33285	1	1	1	0.999846	0.711325
																		4.72087	0.963198	5.08754	1.00416	4.99587	0.987036	5.68338	0.281169	5.68338	0.282457	5.59171	0.41579	8.42392	1	1	1	0.999867	0.725395
																		4.7667	0.985015	5.13337	1.01716	5.04171	0.9901	5.72921	0.269609	5.72921	0.322887	5.63754	0.412856	8.51499	1	1	1	0.999885	0.738916
																		4.81254	0.980691	5.17921	0.998814	5.08754	1.00459	5.77505	0.284864	5.77505	0.307272	5.68338	0.456481	8.60605	1	1	1	0.999901	0.751891
																		4.85837	0.982998	5.22504	1.00434	5.13337	0.997931	5.82088	0.305796	5.82088	0.284529	5.72921	0.436284	8.69712	1	1	1	0.999914	0.764326
																		4.90421	1.00166	5.27087	0.996845	5.17921	0.98833	5.86671	0.283867	5.86671	0.311471	5.77505	0.492766	8.78818	1	1	1	0.999926	0.77623
																		4.95004	0.978743			5.22504	1.01374	5.91255	0.301668	5.91255	0.33014	5.82088	0.44922	8.87925	1	1	1	0.999936	0.787614
																		4.99587	1.0076					5.95838	0.330272	5.95838	0.335893	5.86671	0.469691	8.97032	1	1	1	0.999945	0.798489
																		5.04171	0.996526					6.00421	0.326469	6.00421	0.367551	5.91255	0.455911	9.06138	1	1	1	0.999952	0.808868
																		5.08754	1.0337					6.05005	0.319947	6.05005	0.355653	5.95838	0.460226	9.15245	1	1	1	0.999959	0.818767
																		5.13337	0.998995					6.09588	0.32648	6.09588	0.34027	6.00421	0.49852	9.24352	1	1	1	0.999964	0.828199
																		5.17921	1.00126					6.14172	0.347109	6.14172	0.347845	6.05005	0.541518	9.33458	1	1	1	0.999969	0.83718
																		5.22504	0.984945					6.18755	0.334378	6.18755	0.346791	6.09588	0.50577	9.42565	1	1	1	0.999973	0.845727
																		5.27087	0.991796					6.23338	0.354932	6.23338	0.3797	6.14172	0.540799	9.51671	1	1	1	0.999977	0.853855
																		5.31671	0.99051					6.27922	0.350165	6.27922	0.404051	6.18755	0.513876	9.60778	1	1	1	0.99998	0.861582
																		5.36254	1.01769					6.32505	0.351877	6.32505	0.374322	6.23338	0.569616	9.69885	1	1	1	0.999983	0.868922
																								6.37088	0.36867	6.37088	0.444553	6.27922	0.542077	9.78991	1	1	1	0.999985	0.875893
																								6.41672	0.349406	6.41672	0.386114	6.32505	0.553894	9.88098	1	1	1	0.999987	0.882511
																								6.46255	0.366503	6.46255	0.452289	6.37088	0.505176	9.97205	1	1	1	0.999989	0.888789
																								6.50838	0.382355	6.50838	0.4383	6.41672	0.544772	10.0631	1	1	1	0.999991	0.894745
																								6.55422	0.376125	6.55422	0.413824	6.46255	0.559866	10.1542	1	1	1	0.999992	0.900393
																								6.60005	0.396602	6.60005	0.407321	6.50838	0.546108	10.2452	1	1	1	0.999993	0.905748
																								6.64589	0.378909	6.64589	0.392921	6.55422	0.581102	10.3363	1	1	1	0.999994	0.910822
																								6.69172	0.398542	6.69172	0.410465	6.60005	0.570484	10.4274	1	1	1	0.999995	0.91563
																								6.73755	0.404273	6.73755	0.444857	6.64589	0.543539	10.5184	1	1	1	0.999995	0.920185
																								6.78339	0.398292	6.78339	0.465795	6.69172	0.535113	10.6095	1	1	1	0.999996	0.924499
																								6.82922	0.42123	6.82922	0.456737	6.73755	0.567333	10.7006	1	1	1	0.999997	0.928585
																								6.87505	0.424534	6.87505	0.468636	6.78339	0.593067	10.7916	1	1	1	0.999997	0.932453
																								6.92089	0.440147	6.92089	0.439801	6.82922	0.588101	10.8827	1	1	1	0.999997	0.936115
																								6.96672	0.4141	6.96672	0.46726	6.87505	0.590304	10.9738	1	1	1	0.999998	0.939581
																								7.01256	0.397816	7.01256	0.484161	6.92089	0.617889	11.0648	1	1	1	0.999998	0.942862
																								7.05839	0.44746	7.05839	0.542046	6.96672	0.652803	11.1559	1	1	1	0.999998	0.945966
																								7.10422	0.440624	7.10422	0.51975	7.01256	0.625904	11.247	1	1	1	0.999999	0.948904
																								7.15006	0.430071	7.15006	0.502635	7.05839	0.614338	11.338	1	1	1	0.999999	0.951683
																								7.19589	0.455424	7.19589	0.501259	7.10422	0.637938	11.4291	1	1	1	0.999999	0.954313
																								7.24172	0.444708	7.24172	0.531666	7.15006	0.637595	11.5202	1	1	1	0.999999	0.9568
																								7.28756	0.480647	7.28756	0.518196	7.19589	0.623438	11.6112	1	1	1	0.999999	0.959153
																								7.33339	0.480008	7.33339	0.555839	7.24172	0.626726	11.7023	1	1	1	0.999999	0.961379
																								7.37922	0.476725	7.37922	0.549782	7.28756	0.641409	11.7934	1	1	1	0.999999	0.963484
																								7.42506	0.480344	7.42506	0.583602	7.33339	0.658477	11.8844	1	1	1	0.999999	0.965476
																								7.47089	0.488145	7.47089	0.586407	7.37922	0.639468	11.9755	1	1	1	1	0.967359
																								7.51673	0.472196	7.51673	0.571525	7.42506	0.653225	12.0666	1	1	1	1	0.969139
																								7.56256	0.468956	7.56256	0.595108	7.47089	0.651775	12.1576	1	1	1	1	0.970823
																								7.60839	0.4703	7.60839	0.601504	7.51673	0.672955	12.2487	1	1	1	1	0.972416
																								7.65423	0.494927	7.65423	0.59475	7.56256	0.648088	12.3398	1	1	1	1	0.973922
																								7.70006	0.469477	7.70006	0.56663	7.60839	0.682248	12.4308	1	1	1	1	0.975345
																								7.74589	0.503649	7.74589	0.629321	7.65423	0.700391	12.5219	1	1	1	1	0.976692
																								7.79173	0.509478	7.79173	0.641291	7.70006	0.704227	12.613	1	1	1	1	0.977965
																								7.83756	0.491969	7.83756	0.632161	7.74589	0.68975	12.704	1	1	1	1	0.979168
																								7.8834	0.510063	7.8834	0.626159	7.79173	0.681312	12.7951	1	1	1	1	0.980306
																								7.92923	0.489109	7.92923	0.61292	7.83756	0.712699	12.8862	1	1	1	1	0.981382
																								7.97506	0.498914	7.97506	0.612348	7.8834	0.679771	12.9772	1	1	1	1	0.9824
																								8.0209	0.515871	8.0209	0.635592	7.92923	0.682009	13.0683	1	1	1	1	0.983361
																								8.06673	0.51508	8.06673	0.692744	7.97506	0.688734	13.1594	1	1	1	1	0.984271
																								8.11256	0.518547	8.11256	0.673324	8.0209	0.671368	13.2504	1	1	1	1	0.98513
																								8.1584	0.509608	8.1584	0.659603	8.06673	0.663022	13.3415	1	1	1	1	0.985943
																								8.20423	0.507918	8.20423	0.661604	8.11256	0.673377	13.4326	1	1	1	1	0.986711
																								8.25007	0.557769	8.25007	0.665874	8.1584	0.666846	13.5236	1	1	1	1	0.987438
																								8.2959	0.509012	8.2959	0.684508	8.20423	0.707207	13.6147	1	1	1	1	0.988125
																								8.34173	0.527009	8.34173	0.670287	8.25007	0.725612	13.7058	1	1	1	1	0.988774
																								8.38757	0.505729	8.38757	0.677005	8.2959	0.696714	13.7968	1	1	1	1	0.989388
																								8.4334	0.54182	8.4334	0.680774	8.34173	0.738353	13.8879	1	1	1	1	0.989968
																								8.47923	0.529273	8.47923	0.750093	8.38757	0.752728	13.979	1	1	1	1	0.990516
																								8.52507	0.546219	8.52507	0.741804	8.4334	0.721205	14.07	1	1	1	1	0.991035
																								8.5709	0.562893	8.5709	0.72794	8.47923	0.679223	14.1611	1	1	1	1	0.991525
																								8.61673	0.550488	8.61673	0.717756	8.52507	0.718681	14.2522	1	1	1	1	0.991988
																								8.66257	0.54195	8.66257	0.746788	8.5709	0.733341	14.3432	1	1	1	1	0.992426
																								8.7084	0.550845	8.7084	0.806621	8.61673	0.706088	14.4343	1	1	1	1	0.992841
																								8.75424	0.532751	8.75424	0.757937	8.66257	0.719857	14.5254	1	1	1	1	0.993232
																								8.80007	0.579026	8.80007	0.767656	8.7084	0.756187	14.6164	1	1	1	1	0.993602
																								8.8459	0.536229	8.8459	0.75481	8.75424	0.734631	14.7075	1	1	1	1	0.993952
																								8.89174	0.554659	8.89174	0.820842	8.80007	0.723008	14.7986	1	1	1	1	0.994283
																								8.93757	0.581594	8.93757	0.762921	8.8459	0.755685	14.8896	1	1	1	1	0.994595
																								8.9834	0.543835	8.9834	0.825148	8.89174	0.721901	14.9807	1	1	1	1	0.994891
																								9.02924	0.568267	9.02924	0.834849	8.93757	0.731834	15.0718	1	1	1	1	0.99517
																								9.07507	0.563977	9.07507	0.808979	8.9834	0.738936	15.1628	1	1	1	1	0.995434
																								9.12091	0.586676	9.12091	0.805245	9.02924	0.745592	15.2539	1	1	1	1	0.995684
																								9.16674	0.53481	9.16674	0.786236	9.07507	0.728546	15.3449	1	1	1	1	0.99592
																								9.21257	0.570738	9.21257	0.838869	9.12091	0.764465	15.436	1	1	1	1	0.996143
																								9.25841	0.589644	9.25841	0.859557	9.16674	0.748835	15.5271	1	1	1	1	0.996354
																								9.30424	0.553554	9.30424	0.86556	9.21257	0.742338	15.6181	1	1	1	1	0.996554
																								9.35007	0.600642	9.35007	0.86749	9.25841	0.778714	15.7092	1	1	1	1	0.996742
																								9.39591	0.575234	9.39591	0.849481	9.30424	0.809643	15.8003	1	1	1	1	0.99692
																								9.44174	0.614207	9.44174	0.869526	9.35007	0.785062	15.8913	1	1	1	1	0.997089
																								9.48758	0.563446	9.48758	0.86799	9.39591	0.786398	15.9824	1	1	1	1	0.997248
																								9.53341	0.579146	9.53341	0.884337	9.44174	0.782185	16.0735	1	1	1	1	0.997398
																								9.57924	0.587347	9.57924	0.867722	9.48758	0.782733	16.1645	1	1	1	1	0.997541
																								9.62508	0.577206	9.62508	0.884373	9.53341	0.794732	16.2556	1	1	1	1	0.997675
																								9.67091	0.58465	9.67091	0.862719	9.57924	0.77788	16.3467	1	1	1	1	0.997802
																								9.71674	0.596904	9.71674	0.865185	9.62508	0.80269	16.4377	1	1	1	1	0.997923
																								9.76258	0.61166	9.76258	0.903739	9.67091	0.766942	16.5288	1	1	1	1	0.998036
																								9.80841	0.581042	9.80841	0.880156	9.71674	0.803284	16.6199	1	1	1	1	0.998144
																								9.85424	0.579741	9.85424	0.900452	9.76258	0.782493	16.7109	1	1	1	1	0.998245
																								9.90008	0.586242	9.90008	0.888928	9.80841	0.833392	16.802	1	1	1	1	0.998341
																								9.94591	0.576123	9.94591	0.947993	9.85424	0.854525	16.8931	1	1	1	1	0.998432
																								9.99175	0.622018	9.99175	0.946349	9.90008	0.832592	16.9841	1	1	1	1	0.998518
																								10.0376	0.597294	10.0376	0.919157	9.94591	0.834739	17.0752	1	1	1	1	0.998599
																								10.0834	0.615323	10.0834	0.940364	9.99175	0.84039	17.1663	1	1	1	1	0.998675
																								10.1292	0.593155	10.1292	0.872671	10.0376	0.830001	17.2573	1	1	1	1	0.998748
																								10.1751	0.602245	10.1751	0.906508	10.0834	0.859286	17.3484	1	1	1	1	0.998816
																								10.2209	0.585581	10.2209	0.93111	10.1292	0.827614	17.4395	1	1	1	1	0.998881
																								10.2667	0.578777	10.2667	0.910475	10.1751	0.86689	17.5305	1	1	1	1	0.998942
																								10.3126	0.591876	10.3126	0.970968	10.2209	0.841235	17.6216	1	1	1	1	0.999
																								10.3584	0.604596	10.3584	0.9558	10.2667	0.870041	17.7127	1	1	1	1	0.999055
																								10.4042	0.645107	10.4042	0.93847	10.3126	0.874859	17.8037	1	1	1	1	0.999106
																								10.4501	0.614748	10.4501	0.975756	10.3584	0.864664	17.8948	1	1	1	1	0.999155
																								10.4959	0.605398	10.4959	0.963339	10.4042	0.838484	17.9859	1	1	1	1	0.999201
																								10.5418	0.626547	10.5418	0.975059	10.4501	0.900183	18.0769	1	1	1	1	0.999245
																								10.5876	0.639148	10.5876	0.983992	10.4959	0.884496	18.168	1	1	1	1	0.999286
																								10.6334	0.638119	10.6334	0.898111	10.5418	0.90588
																								10.6793	0.639982	10.6793	0.984493	10.5876	0.932768
																								10.7251	0.638303	10.7251	0.956229	10.6334	0.927128
																								10.7709	0.631163	10.7709	0.972862	10.6793	0.928807
																								10.8168	0.618595	10.8168	1.04831	10.7251	0.92682
																								10.8626	0.622712	10.8626	0.95714	10.7709	0.922413
																								10.9084	0.658618	10.9084	1.03005	10.8168	0.933625
																								10.9543	0.645616	10.9543	1.00625	10.8626	0.903391
																								11.0001	0.670016	11.0001	0.974523	10.9084	0.936981
																								11.0459	0.650481	11.0459	0.951226	10.9543	0.931592
																								11.0918	0.675293	11.0918	0.962911	11.0001	0.938032
																								11.1376	0.669496	11.1376	0.986708	11.0459	0.941537
																								11.1834	0.677286	11.1834	0.98937	11.0918	0.963846
																								11.2293	0.670905	11.2293	1.01938	11.1376	0.914329
																								11.2751	0.691274	11.2751	1.00536	11.1834	0.940144
																								11.3209	0.67785	11.3209	0.982098	11.2293	0.950625
																								11.3668	0.69096	11.3668	0.957712	11.2751	0.970606
																								11.4126	0.698804	11.4126	0.96518	11.3209	0.936353
																								11.4584	0.675574	11.4584	1.01177	11.3668	0.998635
																								11.5043	0.753335	11.5043	0.95555	11.4126	0.94696
																								11.5501	0.73458	11.5501	1.01285	11.4584	0.996363
																								11.5959	0.718989	11.5959	1.05397	11.5043	0.96202
																								11.6418	0.734104	11.6418	0.988298	11.5501	1.0094
																								11.6876	0.744852	11.6876	1.02987	11.5959	0.952543
																								11.7334	0.70381	11.7334	1.02024	11.6418	0.957464
																								11.7793	0.727874	11.7793	0.997499	11.6876	0.976657
																								11.8251	0.80337	11.8251	0.98376	11.7334	0.990061
																								11.8709	0.784713	11.8709	0.996373	11.7793	0.954907
																								11.9168	0.801593	11.9168	0.969843	11.8251	0.951196
																								11.9626	0.788711	11.9626	1.00055	11.8709	0.988497
																								12.0084	0.808744	12.0084	0.967627	11.9168	0.958674
																								12.0543	0.832136	12.0543	1.01735	11.9626	1.01525
																								12.1001	0.82674	12.1001	0.993193	12.0084	0.98482
																								12.1459	0.809838	12.1459	1.04281	12.0543	0.977136
																								12.1918	0.832884	12.1918	0.968467	12.1001	0.985037
																								12.2376	0.80077	12.2376	1.03525	12.1459	0.983005
																								12.2834	0.82946	12.2834	1.00883	12.1918	0.992196
																								12.3293	0.832548	12.3293	0.993479	12.2376	1.03123
																								12.3751	0.823447	12.3751	1.01585	12.2834	1.01032
																								12.4209	0.858139	12.4209	1.00223	12.3293	1.01501
																								12.4668	0.847381	12.4668	1.00198	12.3751	1.02287
																								12.5126	0.797292	12.5126	1.05701	12.4209	0.99352
																								12.5584	0.814703	12.5584	1.00111	12.4668	1.02902
																								12.6043	0.840208	12.6043	1.03048	12.5126	1.03475
																								12.6501	0.84517	12.6501	1.02691	12.5584	1.0337
																								12.6959	0.826719	12.6959	0.963322	12.6043	1.00408
																								12.7418	0.819308	12.7418	0.94601	12.6501	1.01584
																								12.7876	0.858183	12.7876	0.986922	12.6959	1.00581
																								12.8334	0.854997	12.8334	1.00504	12.7418	1.00286
																								12.8793	0.821962	12.8793	1.00188	12.7876	1.01481
																								12.9251	0.832429	12.9251	0.988137	12.8334	0.997676
																								12.9709	0.842277	12.9709	0.985975	12.8793	1.03348
																								13.0168	0.878379	13.0168	1.00523	12.9251	0.986179
																								13.0626	0.852549			12.9709	0.982365
																								13.1084	0.841335			13.0168	0.964166
																								13.1543	0.867544			13.0626	0.993395
																								13.2001	0.871834			13.1084	0.972809
																								13.2459	0.85984			13.1543	1.02117
																								13.2918	0.853188			13.2001	0.988223
																								13.3376	0.854867			13.2459	0.998258
																								13.3834	0.870469			13.2918	1.00847
																								13.4293	0.863752			13.3376	0.999332
																								13.4751	0.841508			13.3834	1.02718
																								13.5209	0.869505			13.4293	1.00542
																								13.5668	0.8658			13.4751	1.00165
																								13.6126	0.878465			13.5209	0.980413
																								13.6584	0.897502			13.5668	1.00611
																								13.7043	0.883341			13.6126	0.969144
																								13.7501	0.887166			13.6584	0.980322
																								13.7959	0.875215			13.7043	0.963812
																								13.8418	0.873341			13.7501	0.983815
																								13.8876	0.883623			13.7959	0.962705
																								13.9334	0.931155			13.8418	1.01025
																								13.9793	0.889181			13.8876	0.992036
																								14.0251	0.90514			13.9334	1.01259
																								14.0709	0.909019			13.9793	0.988565
																								14.1168	0.899279			14.0251	1.01852
																								14.1626	0.886895			14.0709	0.996728
																								14.2084	0.903093			14.1168	1.00536
																								14.2543	0.908629			14.1626	1.00952
																								14.3001	0.908532			14.2084	0.990951
																								14.3459	0.904089			14.2543	1.02227
																								14.3918	0.919226			14.3001	0.998441
																								14.4376	0.900915			14.3459	0.99207
																								14.4834	0.894252
																								14.5293	0.92512
																								14.5751	0.924199
																								14.6209	0.916679
																								14.6668	0.917275
																								14.7126	0.885042
																								14.7585	0.956811
																								14.8043	0.918695
																								14.8501	0.907654
																								14.896	0.932357
																								14.9418	0.922855
																								14.9876	0.93175
																								15.0335	0.918597
																								15.0793	0.935413
																								15.1251	0.878595
																								15.171	0.901413
																								15.2168	0.898759
																								15.2626	0.944806
																								15.3085	0.955782
																								15.3543	0.955229
																								15.4001	0.968393
																								15.446	0.978416
																								15.4918	0.986303
																								15.5376	0.991612
																								15.5835	1.0049
																								15.6293	0.961893
																								15.6751	0.971124
																								15.721	0.971015
																								15.7668	0.927601
																								15.8126	0.964341
																								15.8585	0.992826
																								15.9043	0.971276
																								15.9501	0.990496
																								15.996	0.957884
																								16.0418	0.988427
																								16.0876	0.966346
																								16.1335	1.01898
																								16.1793	0.989434
																								16.2251	0.968621
																								16.271	0.98068
																								16.3168	0.993205
																								16.3626	0.997669
																								16.4085	0.980615
																								16.4543	1.00565
																								16.5001	0.956746
																								16.546	0.982858
																								16.5918	1.00373
																								16.6376	0.980225
																								16.6835	0.955392
																								16.7293	0.970864
																								16.7751	0.980149
																								16.821	0.955468
																								16.8668	0.986856
																								16.9126	1.00369
																								16.9585	0.978535
																								17.0043	1.02281
																								17.0501	0.968892
																								17.096	0.968404
																								17.1418	0.9873
																								17.1876	0.978838
																								17.2335	0.966768
																								17.2793	1.00911
																								17.3251	0.987842
																								17.371	0.957125
																								17.4168	0.999186
																								17.4626	1.01858
																								17.5085	1.01511
																								17.5543	1.00537
																								17.6001	1.00906
																								17.646	1.01056
																								17.6918	1.01997
																								17.7376	0.98925
																								17.7835	0.966032
																								17.8293	1.00321
																								17.8751	0.984125
																								17.921	1.01078
																								17.9668	1.02277
																								18.0126	1.00365
																								18.0585	0.985241
																								18.1043	1.00604
																								18.1501	0.989315

## Sheet: Fig. 6b
2 uM Ab control						Dam_014 0.1 uM						Dam_014 0.25 uM						Dam_014 0.5 uM						Dam_014 1 uM						Fits
time / h	relative aggregate conc	time / h	relative aggregate conc	time / h	relative aggregate conc	time / h	relative aggregate conc	time / h	relative aggregate conc	time / h	relative aggregate conc	time / h	relative aggregate conc	time / h	relative aggregate conc	time / h	relative aggregate conc	time / h	relative aggregate conc	time / h	relative aggregate conc	time / h	relative aggregate conc	time / h	relative aggregate conc	time / h	relative aggregate conc	time / h	relative aggregate conc	time / h	2 uM Ab control	Dam_014 0.1 uM	Dam_014 0.25 uM	Dam_014 0.5 uM	Dam_014 1 uM
0.229168	-0.00601208	0.229168	0.00204093	0.275002	-0.00750564	0.229168	0.00568082	0.045833	0.0106673	0.275002	0.00269448	0.366669	-0.000568909	0.412503	0.0134173	0.366669	0.00535467	0.595837	-0.00289538	0.641671	-0.0155747	0.779172	-0.0142236	11.4584	0.0179952	5.45421	0.0326595	5.63754	0.0100638	0.045833	5.37209e-06	4.87893e-06	4.21602e-06	3.30368e-06	1.94007e-06
0.275002	0.00647813	0.275002	-0.00324184	0.320835	0.00720518	0.275002	-0.0128957	0.0916667	-0.00489251	0.320835	-0.00202698	0.412503	-0.00190789	0.458336	-0.00944929	0.412503	0.00206013	0.641671	-0.0194925	0.687505	0.00593349	0.825006	0.024929	11.5043	0.0123069	5.50004	-0.00947886	5.68338	0.00617814	0.172517	0.000112211	9.04262e-05	6.78177e-05	4.94987e-05	2.74802e-05
0.320835	-0.000466053	0.320835	0.00120091	0.366669	0.000300459	0.320835	0.00721489	0.1375	-0.00577482	0.366669	-0.000667495	0.458336	0.0024768	0.50417	-0.00396798	0.458336	-0.0074148	0.687505	0.0223878	0.733339	0.00964117	0.87084	-0.0107053	11.5501	-0.0157262	5.54588	0.0629046	5.72921	-0.0590227	0.299202	0.000717788	0.000465641	0.000265618	0.00016767	8.26743e-05
0.366669	-0.00710264	0.366669	-0.0111287	0.412503	0.0066276	0.366669	-0.00212367	0.183334	-0.000793464	0.412503	-0.00898057	0.50417	0.00197704	0.550004	-0.0031247	0.50417	-0.0165644	0.733339	-0.0115815	0.779172	-0.0194263	0.916673	0.000872062	11.5959	-0.00652942	5.59171	-0.0277519	5.77505	-0.000202922	0.425886	0.00395923	0.00197483	0.000788379	0.000405658	0.000167615
0.412503	0.00621714	0.412503	-0.0251943	0.458336	-0.00436395	0.412503	-0.00371642	0.229168	0.00531835	0.458336	-0.0152544	0.550004	-0.00715065	0.595837	-3.59537e-05	0.550004	-0.0145877	0.779172	0.0073941	0.825006	-0.00875325	0.962507	0.0145394	11.6418	-0.0142274	5.63754	0.0086367	5.82088	0.0494196	0.55257	0.0208913	0.00796839	0.0021383	0.000859659	0.000282474
0.458336	-0.00507997	0.458336	0.00517699	0.50417	0.0160527	0.458336	-0.0185877	0.275002	-0.0155905	0.50417	0.00290575	0.595837	0.0171584	0.641671	0.00661221	0.595837	-0.00638891	0.825006	0.0135255	0.87084	-0.0220541	1.00834	-0.00604429	11.6876	0.0248076	5.68338	-0.0104634	5.86671	0.0347325	0.679254	0.100023	0.0310571	0.00559911	0.00171259	0.000427504
0.50417	-0.0026565	0.50417	-0.00213115	0.550004	0.0193956	0.50417	-0.00408527	0.320835	-0.00844012	0.550004	-0.00785991	0.641671	0.023363	0.687505	0.014741	0.641671	0.00172651	0.87084	-0.024972	0.916673	0.0108291	1.05417	0.0358748	11.7334	0.031041	5.72921	-0.0269249	5.91255	0.0236102	0.805939	0.344046	0.110769	0.0143768	0.00330603	0.000603037
0.550004	0.00656202	0.550004	-0.00706859	0.595837	0.0586537	0.550004	0.0136781	0.366669	-0.0139821	0.595837	0.0182551	0.687505	0.0365076	0.733339	-0.0118222	0.687505	-0.00388672	0.916673	-0.0133258	0.962507	-0.0110031	1.10001	0.0403855	11.7793	-0.00203324	5.77505	-0.0502389	5.95838	-0.0216276	0.932623	0.668759	0.310641	0.0360734	0.0062708	0.000809483
0.595837	0.0484788	0.595837	0.00467298	0.641671	0.105945	0.595837	0.032548	0.412503	-0.033448	0.641671	0.0332737	0.733339	0.0609864	0.779172	0.0161432	0.733339	0.0144126	0.962507	-0.00747632	1.00834	0.0100011	1.14584	0.0341157	11.8251	-0.0234923	5.82088	-0.00132686	6.00421	0.0105629	1.05931	0.864885	0.587166	0.086506	0.0117557	0.00104734
0.641671	0.0881306	0.641671	0.0349603	0.687505	0.205981	0.641671	0.0524407	0.458336	-0.0197079	0.687505	0.0664985	0.779172	0.0813162	0.825006	0.0349307	0.779172	0.0195504	1.00834	-0.0143301	1.05417	0.0276216	1.19168	0.0496023	11.8709	-0.00346384	5.86671	0.0136382	6.05005	-0.0251568	1.18599	0.948044	0.794965	0.189124	0.0218022	0.00131717
0.687505	0.132284	0.687505	0.0671889	0.733339	0.265848	0.687505	0.0634642	0.50417	-0.0161971	0.733339	0.0975462	0.825006	0.108096	0.87084	0.0494233	0.825006	0.0510195	1.05417	0.0195688	1.10001	0.0142488	1.23751	0.0893112	11.9168	0.00607352	5.91255	-0.0155043	6.09588	-0.00661963	1.31268	0.98026	0.905395	0.353627	0.0398764	0.00161963
0.733339	0.172029	0.733339	0.126317	0.779172	0.374442	0.733339	0.101497	0.550004	-0.00347715	0.779172	0.131506	0.87084	0.129246	0.916673	0.0435301	0.87084	0.0673254	1.10001	0.0014565	1.14584	0.0475279	1.28334	0.0774482	11.9626	-0.0149427	5.95838	-0.0167645	6.14172	-0.0311814	1.43936	0.992517	0.957265	0.545117	0.0713794	0.00195547
0.779172	0.266862	0.779172	0.231478	0.825006	0.464238	0.779172	0.179023	0.595837	0.0105846	0.825006	0.20151	0.916673	0.19776	0.962507	0.0811835	0.916673	0.0796445	1.14584	0.0542782	1.19168	-0.000527955	1.32918	0.0766814	12.0084	-0.011809	6.00421	0.0406146	6.18755	0.0092439	1.56604	0.997165	0.980801	0.709616	0.123432	0.00232551
0.825006	0.350863	0.825006	0.350135	0.87084	0.596583	0.825006	0.228767	0.641671	0.0240949	0.87084	0.27405	0.962507	0.233931	1.00834	0.125279	0.962507	0.126677	1.19168	0.0223702	1.23751	0.0375388	1.37501	0.13529	12.0543	0.000691721	6.05005	-0.0420869	6.23338	0.00439572	1.69273	0.998926	0.991387	0.824575	0.202518	0.00273064
0.87084	0.466239	0.87084	0.459766	0.916673	0.664361	0.87084	0.281143	0.687505	0.0735225	0.916673	0.338791	1.00834	0.273328	1.05417	0.15299	1.00834	0.143083	1.23751	0.0443411	1.28334	0.0606488	1.42084	0.127938	12.1001	0.00389355	6.09588	-0.0205451	6.27922	0.0116323	1.81941	0.999593	0.996137	0.89669	0.309299	0.00317187
0.916673	0.551014	0.916673	0.619827	0.962507	0.778328	0.916673	0.357025	0.733339	0.10796	0.962507	0.389652	1.05417	0.317165	1.10001	0.187132	1.05417	0.196672	1.28334	0.0623653	1.32918	0.0768294	1.46668	0.176352	12.1459	0.0260679	6.14172	-0.0118024	6.32505	0.0361941	1.9461	0.999846	0.998268	0.939803	0.43416	0.00365027
0.962507	0.665635	0.962507	0.716317	1.00834	0.826635	0.962507	0.408597	0.779172	0.155697	1.00834	0.470762	1.10001	0.36501	1.14584	0.238337	1.10001	0.214387	1.32918	0.0831204	1.37501	0.0834348	1.51251	0.191598	12.1918	0.0574049	6.18755	0.0357313	6.37088	0.0197602	2.07278	0.999942	0.999223	0.965073	0.560092	0.00416702
1.00834	0.769518	1.00834	0.777507	1.05417	0.866112	1.00834	0.511153	0.825006	0.197689	1.05417	0.550916	1.14584	0.407348	1.19168	0.275824	1.14584	0.240568	1.37501	0.0837371	1.42084	0.157768	1.55835	0.228375	12.2376	0.00709538	6.23338	0.0305329	6.41672	0.0564423	2.19947	0.999978	0.999652	0.979769	0.671855	0.00472338
1.05417	0.835017	1.05417	0.864459	1.10001	0.937487	1.05417	0.575224	0.87084	0.271224	1.10001	0.617017	1.19168	0.430101	1.23751	0.312467	1.19168	0.272121	1.42084	0.141968	1.46668	0.15739	1.60418	0.260912	12.2834	0.00627789	6.27922	0.000839132	6.46255	-0.0299693	2.32615	0.999992	0.999844	0.988289	0.762071	0.0053207
1.10001	0.903788	1.10001	0.892356	1.14584	0.961658	1.10001	0.651584	0.916673	0.330862	1.14584	0.688766	1.23751	0.461077	1.28334	0.361073	1.23751	0.301413	1.46668	0.147817	1.51251	0.178629	1.65001	0.295524	12.3293	0.0238539	6.32505	-0.0398815	6.50838	-0.0151396	2.45283	0.999997	0.99993	0.993222	0.830493	0.00596043
1.14584	0.965876	1.14584	0.948675	1.19168	0.959313	1.14584	0.705545	0.962507	0.418918	1.19168	0.721596	1.28334	0.546847	1.32918	0.413592	1.28334	0.350022	1.51251	0.160503	1.55835	0.220205	1.69585	0.318243	12.3751	-0.0283291	6.37088	0.0208844	6.55422	0.00279154	2.57952	0.999999	0.999969	0.996078	0.88047	0.00664412
1.19168	0.952369	1.19168	0.974585	1.23751	1.00038	1.19168	0.784746	1.00834	0.50191	1.23751	0.750651	1.32918	0.565206	1.37501	0.464081	1.32918	0.369914	1.55835	0.194508	1.60418	0.217127	1.74168	0.352283	12.4209	0.064013	6.41672	0.0174582	6.60005	0.000367452	2.7062	1	0.999986	0.997731	0.916194	0.00737341
1.23751	1.00189	1.23751	1.00681	1.28334	1.00661	1.23751	0.810641	1.05417	0.611904	1.28334	0.79792	1.37501	0.58381	1.42084	0.503303	1.37501	0.398531	1.60418	0.227279	1.65001	0.311853	1.78751	0.351772	12.4668	-0.0177018	6.46255	-0.00345347	6.64589	-0.0378833	2.83289	1	0.999994	0.998687	0.941426	0.00815005
1.28334	0.989784	1.28334	0.984245	1.32918	0.975345	1.28334	0.853662	1.10001	0.656011	1.32918	0.799509	1.42084	0.629072	1.46668	0.539152	1.42084	0.423403	1.65001	0.220302	1.69585	0.302908	1.83335	0.406005	12.5126	0.0115575	6.50838	0.017537	6.69172	-0.0660098	2.95957	1	0.999997	0.99924	0.959131	0.00897588
1.32918	1.02219	1.32918	0.979242	1.37501	1.00104	1.32918	0.857016	1.14584	0.697203	1.37501	0.86031	1.46668	0.670165	1.51251	0.580777	1.46668	0.462445	1.69585	0.253373	1.74168	0.382659	1.87918	0.431145	12.5584	0.0436098	6.55422	-0.0181822	6.73755	0.0320589	3.08626	1	0.999999	0.99956	0.971511	0.00985287
1.37501	1.04338	1.37501	1.04243	1.42084	1.0212	1.37501	0.894529	1.19168	0.750776	1.42084	0.857664	1.51251	0.685771	1.55835	0.611919	1.51251	0.482538	1.74168	0.311392	1.78751	0.395582	1.92501	0.453518	12.6043	0.0206521	6.60005	-0.0194818	6.78339	0.0262125	3.21294	1	0.999999	0.999746	0.98015	0.0107831
1.42084	1.05808	1.42084	0.988221	1.46668	1.01823	1.42084	0.932043	1.23751	0.826406	1.46668	0.922341	1.55835	0.763601	1.60418	0.670291	1.55835	0.567628	1.78751	0.335442	1.83335	0.416424	1.97085	0.475951	12.6501	0.00781068	6.64589	-0.0018782	6.82922	0.0185125	3.33962	1	1	0.999853	0.986173	0.0117686
1.46668	1.00795	1.46668	1.02245	1.51251	0.995298	1.46668	0.958499	1.28334	0.828842	1.51251	0.938912	1.60418	0.81055	1.65001	0.659299	1.60418	0.584927	1.83335	0.369323	1.87918	0.419016	2.01668	0.499256	12.6959	0.00978627	6.69172	0.0131656	6.87505	-0.0154248	3.46631	1	1	0.999915	0.99037	0.0128118
1.51251	0.994631	1.51251	1.02387	1.55835	0.998326	1.51251	0.934432	1.32918	0.893213	1.55835	0.91344	1.65001	0.815793	1.69585	0.704483	1.65001	0.608739	1.87918	0.379859	1.92501	0.48831	2.06252	0.547144	12.7418	0.0105356	6.73755	0.0389212	6.92089	0.0161953	3.59299	1	1	0.999951	0.993294	0.0139151
1.55835	0.997418	1.55835	1.00364	1.60418	1.00929	1.55835	0.985593	1.37501	0.830781	1.60418	0.899386	1.69585	0.823459	1.74168	0.733145	1.69585	0.641927	1.92501	0.413705	1.97085	0.481075	2.10835	0.570118	12.7876	0.00430229	6.78339	-0.0278307	6.96672	0.054446	3.71968	1	1	0.999971	0.99533	0.0150809
		1.60418	1.01438	1.65001	0.992384	1.60418	0.95647	1.42084	0.937687	1.65001	0.958147	1.74168	0.860253	1.78751	0.801009	1.74168	0.667182	1.97085	0.438178	2.01668	0.506632	2.15418	0.586883	12.8334	0.00334856	6.82922	-0.0375186	7.01256	0.0602211	3.84636	1	1	0.999983	0.996748	0.0163119
		1.65001	0.991404			1.65001	1.01176	1.46668	0.931897	1.69585	0.957191	1.78751	0.903732	1.83335	0.837182	1.78751	0.710545	2.01668	0.492691	2.06252	0.592107	2.20002	0.595047	12.8793	-0.0278522	6.87505	0.0442377	7.05839	-0.0102201	3.97304	1	1	0.99999	0.997735	0.0176108
		1.69585	0.994213			1.69585	1.01093	1.51251	0.940233	1.74168	0.941392	1.83335	0.887551	1.87918	0.799509	1.83335	0.687049	2.06252	0.505888	2.10835	0.597723	2.24585	0.607873	12.9251	0.0331869	6.92089	-0.00664338	7.10422	0.0323797	4.09973	1	1	0.999994	0.998423	0.0189805
						1.74168	0.984226	1.55835	0.90881	1.78751	0.960462	1.87918	0.934557	1.92501	0.836054	1.87918	0.729862	2.10835	0.548473	2.15418	0.603662	2.29168	0.696056	12.9709	0.0317222	6.96672	-0.00140562	7.15006	0.054553	4.22641	1	1	0.999997	0.998902	0.020424
						1.78751	0.989885	1.60418	0.99057	1.83335	0.948842	1.92501	0.937414	1.97085	0.873521	1.92501	0.776836	2.15418	0.583429	2.20002	0.619681	2.33752	0.718895	13.0168	0.0412936	7.01256	-0.0391332	7.19589	-0.0323221	4.3531	1	1	0.999998	0.999235	0.0219443
						1.83335	0.991301	1.65001	0.991728	1.87918	0.946279	1.97085	0.94161	2.01668	0.887386	1.97085	0.774868	2.20002	0.625045	2.24585	0.671336	2.38335	0.69962	13.0626	0.0182677	7.05839	-0.0279095	7.24172	0.0309538	4.47978	1	1	0.999999	0.999467	0.0235447
						1.87918	0.989633	1.69585	0.947962	1.92501	0.950569	2.01668	0.978573	2.06252	0.887612	2.01668	0.795569	2.24585	0.644161	2.29168	0.724918	2.42919	0.742396	13.1084	0.0265788	7.10422	0.07657	7.28756	0.0113115	4.60647	1	1	0.999999	0.999629	0.0252285
						1.92501	1.01094	1.74168	0.945058	1.97085	0.952736	2.06252	0.956895	2.10835	0.914067	2.06252	0.857832	2.29168	0.684156	2.33752	0.72202	2.47502	0.803094	13.1543	0.0564853	7.15006	0.025689	7.33339	0.060328	4.73315	1	1	1	0.999742	0.0269992
						1.97085	1.02554	1.78751	0.98478	2.01668	0.949797	2.10835	0.968031	2.15418	0.938493	2.10835	0.887899	2.33752	0.694992	2.38335	0.739496	2.52085	0.793562	13.2001	0.00736787	7.19589	-0.0027446	7.37922	0.0410066	4.85983	1	1	1	0.99982	0.0288604
						2.01668	1.00033	1.83335	0.964395	2.06252	0.978144	2.15418	0.977055	2.20002	0.904801	2.15418	0.900352	2.38335	0.713474	2.42919	0.740432	2.56669	0.817408	13.2459	0.0824746	7.24172	0.00639194	7.42506	0.0700244	4.98652	1	1	1	0.999875	0.0308157
						2.06252	0.980102	1.87918	0.982133	2.10835	0.987863	2.20002	0.987531	2.24585	0.948004	2.20002	0.907525	2.42919	0.754333	2.47502	0.787102	2.61252	0.867131	13.2918	0.0416342	7.28756	0.0466794	7.47089	0.0438941	5.1132	1	1	1	0.999913	0.032869
						2.10835	0.995728	1.92501	0.951087	2.15418	1.01287	2.24585	0.981581	2.29168	0.932806	2.24585	0.919585	2.47502	0.765151	2.52085	0.796695	2.65835	0.825708	13.3376	0.0357756	7.33339	0.0197029	7.51673	0.000581343	5.23989	1	1	1	0.999939	0.0350242
						2.15418	1.02601	1.97085	0.950949	2.20002	0.959102	2.29168	0.986899	2.33752	0.985413	2.29168	0.930003	2.52085	0.762349	2.56669	0.784331	2.70419	0.876453	13.3834	0.0502519	7.37922	0.00158738	7.56256	0.0699174	5.36657	1	1	1	0.999958	0.0372854
						2.20002	0.993221	2.01668	0.964699	2.24585	0.987532	2.33752	1.01499	2.38335	1.00037	2.33752	0.947051	2.56669	0.837706	2.61252	0.822307	2.75002	0.897668	13.4293	0.0296444	7.42506	0.0838163	7.60839	0.0183342	5.49326	1	1	1	0.999971	0.0396566
						2.24585	1.01364	2.06252	1.02018	2.29168	0.999051	2.38335	1.02321	2.42919	0.96486	2.38335	0.978478	2.61252	0.799455	2.65835	0.860698	2.79585	0.969643	13.4751	0.0379896	7.47089	0.0480577	7.65423	0.0475659	5.61994	1	1	1	0.999979	0.0421422
						2.29168	0.981753	2.10835	0.990598	2.33752	0.9968	2.42919	0.996565	2.47502	0.948632	2.42919	0.959879	2.65835	0.846004	2.70419	0.835896	2.84169	0.90084	13.5209	0.00682288	7.51673	0.0829892	7.70006	0.0549808	5.74662	1	1	1	0.999986	0.0447464
						2.33752	1.0114	2.15418	1.02295	2.38335	0.944221	2.47502	1.03324	2.52085	1.00352	2.47502	0.956551	2.70419	0.857985	2.75002	0.881486	2.88752	0.899517	13.5668	0.0396246	7.56256	0.0162767	7.74589	0.023432	5.87331	1	1	1	0.99999	0.0474737
						2.38335	1.00684	2.20002	1.00954	2.42919	0.976601	2.52085	1.03256	2.56669	0.990992	2.52085	0.976076	2.75002	0.870459	2.79585	0.909852	2.93336	0.956863	13.6126	0.0712341	7.60839	0.0474276	7.79173	0.0842481	5.99999	1	1	1	0.999993	0.0503286
								2.24585	1.01238	2.47502	0.973735	2.56669	1.00668	2.61252	0.994581	2.56669	0.973599	2.79585	0.896148	2.84169	0.936471	2.97919	0.925213	13.6584	0.0833602	7.65423	0.0681424	7.83756	0.0222912	6.12668	1	1	1	0.999995	0.0533157
								2.29168	1.02656	2.52085	0.982223	2.61252	0.992774	2.65835	0.968606	2.61252	0.95193	2.84169	0.888167	2.88752	0.963361	3.02502	0.999504	13.7043	0.0498432	7.70006	0.115518	7.8834	0.0221843	6.25336	1	1	1	0.999997	0.0564396
								2.33752	1.06498	2.56669	0.997012	2.65835	1.00054	2.70419	1.00396	2.65835	1.00759	2.88752	0.939173	2.93336	0.977346	3.07086	0.966486	13.7501	0.105841	7.74589	0.0742071	7.92923	0.112482	6.38005	1	1	1	0.999998	0.0597048
								2.38335	1.00423	2.61252	0.989525			2.75002	0.984334	2.70419	0.994884	2.93336	0.93565	2.97919	0.946605	3.11669	1.00113	13.7959	0.11933	7.79173	0.0247832	7.97506	0.121429	6.50673	1	1	1	0.999998	0.0631163
								2.42919	0.979532	2.65835	0.998215			2.79585	1.0117	2.75002	1.02157	2.97919	0.949287	3.02502	0.976356	3.16252	0.98095	13.8418	0.0493663	7.83756	0.0585726	8.0209	0.0762628	6.63341	1	1	1	0.999999	0.0666785
								2.47502	0.997509	2.70419	0.975177					2.79585	1.02481	3.02502	0.928056	3.07086	0.97695	3.20836	1.01818	13.8876	0.0709957	7.8834	0.0288395	8.06673	-0.0322508	6.7601	1	1	1	0.999999	0.0703964
								2.52085	1.00987	2.75002	0.964742					2.84169	1.04219	3.07086	0.933941	3.11669	1.01489	3.25419	1.04042	13.9334	0.0455854	7.92923	0.0165918	8.11256	0.109951	6.88678	1	1	1	0.999999	0.0742745
								2.56669	1.02128	2.79585	0.967617					2.88752	1.01639	3.11669	0.973072	3.16252	0.97443	3.30003	0.998722	13.9793	0.0797837	7.97506	0.116818	8.1584	0.0702026	7.01347	1	1	1	1	0.0783175
								2.61252	1.01902	2.84169	1.00036					2.93336	1.01633	3.16252	0.979503	3.20836	0.970615	3.34586	1.02538	14.0251	0.0816571	8.0209	0.0421111	8.20423	0.0531627	7.14015	1	1	1	1	0.0825301
								2.65835	1.02049	2.88752	1.02335					2.97919	0.988512	3.20836	0.968315	3.25419	0.990071	3.39169	1.00678	14.0709	0.0853698	8.06673	0.062432	8.25007	0.111056	7.26684	1	1	1	1	0.0869167
								2.70419	1.01474	2.93336	0.976298					3.02502	0.99516	3.25419	0.993052	3.30003	0.974502	3.43753	1.04211	14.1168	0.0704848	8.11256	0.0454192	8.2959	0.0691332	7.39352	1	1	1	1	0.0914818
								2.75002	1.01207									3.30003	1.0479	3.34586	0.953534	3.48336	0.992978	14.1626	0.132954	8.1584	0.12178	8.34173	0.0635007	7.5202	1	1	1	1	0.0962296
								2.79585	0.992556									3.34586	1.00338	3.39169	1.01952	3.52919	1.04249	14.2084	0.108873	8.20423	0.0849189	8.38757	0.122035	7.64689	1	1	1	1	0.101164
								2.84169	1.02456									3.39169	1.01929	3.43753	0.972756	3.57503	0.997203	14.2543	0.148691	8.25007	0.0942918	8.4334	0.129949	7.77357	1	1	1	1	0.10629
								2.88752	0.982887									3.43753	1.03204	3.48336	1.0006	3.62086	0.986543	14.3001	0.146409	8.2959	0.0825561	8.47923	0.083036	7.90026	1	1	1	1	0.11161
																		3.48336	1.04711	3.52919	0.977184	3.6667	1.01625	14.3459	0.160102	8.34173	0.157933	8.52507	0.120859	8.02694	1	1	1	1	0.117128
																		3.52919	1.03148	3.57503	0.974358			14.3918	0.098109	8.38757	0.0661733	8.5709	0.0912708	8.15363	1	1	1	1	0.122847
																		3.57503	1.04046	3.62086	0.966619			14.4376	0.164087	8.4334	0.0750342	8.61673	0.133728	8.28031	1	1	1	1	0.12877
																		3.62086	1.02237	3.6667	0.996478			14.4834	0.110644	8.47923	0.0576275	8.66257	0.137899	8.40699	1	1	1	1	0.134901
																		3.6667	0.952546	3.71253	0.953372			14.5293	0.137723	8.52507	0.0910231	8.7084	0.138255	8.53368	1	1	1	1	0.141239
																		3.71253	1.04119	3.75836	0.970093			14.5751	0.12839	8.5709	0.0841313	8.75424	0.171301	8.66036	1	1	1	1	0.147789
																		3.75836	0.979662	3.8042	0.989405			14.6209	0.202952	8.61673	0.128948	8.80007	0.140145	8.78705	1	1	1	1	0.154551
																		3.8042	1.01129	3.85003	1.01556			14.6668	0.131728	8.66257	0.108351	8.8459	0.165099	8.91373	1	1	1	1	0.161525
																		3.85003	1.0164	3.89586	0.993581			14.7126	0.143956	8.7084	0.192313	8.89174	0.141428	9.04042	1	1	1	1	0.168713
																		3.89586	0.972315	3.9417	0.993815			14.7585	0.171921	8.75424	0.180498	8.93757	0.143817	9.1671	1	1	1	1	0.176114
																				3.98753	1.0126			14.8043	0.164121	8.80007	0.197235	8.9834	0.227198	9.29378	1	1	1	1	0.183728
																								14.8501	0.191643	8.8459	0.106933	9.02924	0.233044	9.42047	1	1	1	1	0.191553
																								14.896	0.233369	8.89174	0.207041	9.07507	0.231084	9.54715	1	1	1	1	0.199587
																								14.9418	0.205881	8.93757	0.189005	9.12091	0.237643	9.67384	1	1	1	1	0.207829
																								14.9876	0.198592	8.9834	0.13836	9.16674	0.204276	9.80052	1	1	1	1	0.216274
																								15.0335	0.224581	9.02924	0.192116	9.21257	0.216468	9.9272	1	1	1	1	0.22492
																								15.0793	0.234323	9.07507	0.0829499	9.25841	0.168343	10.0539	1	1	1	1	0.233762
																								15.1251	0.234153	9.12091	0.0947644	9.30424	0.223705	10.1806	1	1	1	1	0.242795
																								15.171	0.219131	9.16674	0.164746	9.35007	0.22563	10.3073	1	1	1	1	0.252014
																								15.2168	0.273051	9.21257	0.142731	9.39591	0.260173	10.4339	1	1	1	1	0.261412
																								15.2626	0.235583	9.25841	0.235908	9.44174	0.183315	10.5606	1	1	1	1	0.270983
																								15.3085	0.268657	9.30424	0.234412	9.48758	0.293682	10.6873	1	1	1	1	0.280719
																								15.3543	0.280204	9.35007	0.205072	9.53341	0.293468	10.814	1	1	1	1	0.290612
																								15.4001	0.284428	9.39591	0.237405	9.57924	0.27871	10.9407	1	1	1	1	0.300654
																								15.446	0.325337	9.44174	0.225472	9.62508	0.246341	11.0674	1	1	1	1	0.310836
																								15.4918	0.298496	9.48758	0.212043	9.67091	0.344481	11.194	1	1	1	1	0.321148
																								15.5376	0.278263	9.53341	0.251779	9.71674	0.255039	11.3207	1	1	1	1	0.33158
																								15.5835	0.292944	9.57924	0.214563	9.76258	0.269905	11.4474	1	1	1	1	0.342122
																								15.6293	0.309396	9.62508	0.241343	9.80841	0.272293	11.5741	1	1	1	1	0.352763
																								15.6751	0.358786	9.67091	0.246738	9.85424	0.326122	11.7008	1	1	1	1	0.363493
																								15.721	0.36662	9.71674	0.202316	9.90008	0.342948	11.8275	1	1	1	1	0.3743
																								15.7668	0.314539	9.76258	0.265248	9.94591	0.293861	11.9542	1	1	1	1	0.385172
																								15.8126	0.36318	9.80841	0.286986	9.99175	0.369827	12.0808	1	1	1	1	0.396099
																								15.8585	0.362532	9.85424	0.288246	10.0376	0.279459	12.2075	1	1	1	1	0.407068
																								15.9043	0.333546	9.90008	0.306441	10.0834	0.304591	12.3342	1	1	1	1	0.418068
																								15.9501	0.328777	9.94591	0.248116	10.1292	0.347012	12.4609	1	1	1	1	0.429088
																								15.996	0.310792	9.99175	0.342908	10.1751	0.390147	12.5876	1	1	1	1	0.440115
																								16.0418	0.342572	10.0376	0.258356	10.2209	0.405226	12.7143	1	1	1	1	0.451138
																								16.0876	0.436822	10.0834	0.339836	10.2667	0.306337	12.8409	1	1	1	1	0.462146
																								16.1335	0.315833	10.1292	0.384219	10.3126	0.313645	12.9676	1	1	1	1	0.473128
																								16.1793	0.392234	10.1751	0.344405	10.3584	0.364052	13.0943	1	1	1	1	0.484073
																								16.2251	0.356571	10.2209	0.400208	10.4042	0.360345	13.221	1	1	1	1	0.494971
																								16.271	0.358445	10.2667	0.388276	10.4501	0.412641	13.3477	1	1	1	1	0.505811
																								16.3168	0.422652	10.3126	0.317349	10.4959	0.374533	13.4744	1	1	1	1	0.516584
																								16.3626	0.319376	10.3584	0.347595	10.5418	0.272365	13.601	1	1	1	1	0.52728
																								16.4085	0.394108	10.4042	0.325659	10.5876	0.424227	13.7277	1	1	1	1	0.53789
																								16.4543	0.351871	10.4501	0.362481	10.6334	0.375638	13.8544	1	1	1	1	0.548407
																								16.5001	0.43052	10.4959	0.346886	10.6793	0.404691	13.9811	1	1	1	1	0.558821
																								16.546	0.446359	10.5418	0.346807	10.7251	0.43239	14.1078	1	1	1	1	0.569126
																								16.5918	0.43798	10.5876	0.329715	10.7709	0.397847	14.2345	1	1	1	1	0.579313
																								16.6376	0.443396	10.6334	0.416631	10.8168	0.454563	14.3612	1	1	1	1	0.589378
																								16.6835	0.431133	10.6793	0.377761	10.8626	0.417346	14.4878	1	1	1	1	0.599312
																								16.7293	0.485258	10.7251	0.431832	10.9084	0.470249	14.6145	1	1	1	1	0.609112
																								16.7751	0.429328	10.7709	0.413913	10.9543	0.406296	14.7412	1	1	1	1	0.618772
																								16.821	0.482941	10.8168	0.371735	11.0001	0.427185	14.8679	1	1	1	1	0.628287
																								16.8668	0.452184	10.8626	0.371854	11.0459	0.421018	14.9946	1	1	1	1	0.637653
																								16.9126	0.480387	10.9084	0.349367	11.0918	0.445758	15.1213	1	1	1	1	0.646866
																								16.9585	0.470918	10.9543	0.385755	11.1376	0.467575	15.2479	1	1	1	1	0.655924
																								17.0043	0.450514	11.0001	0.452428	11.1834	0.412677	15.3746	1	1	1	1	0.664823
																								17.0501	0.479161	11.0459	0.462156	11.2293	0.47745	15.5013	1	1	1	1	0.673561
																								17.096	0.500279	11.0918	0.452704	11.2751	0.516663	15.628	1	1	1	1	0.682136
																								17.1418	0.554097	11.1376	0.486257	11.3209	0.547926	15.7547	1	1	1	1	0.690547
																								17.1876	0.51823	11.1834	0.444198	11.3668	0.502974	15.8814	1	1	1	1	0.698793
																								17.2335	0.463867	11.2293	0.443292	11.4126	0.450214	16.008	1	1	1	1	0.706872
																								17.2793	0.497213	11.2751	0.430808	11.4584	0.553773	16.1347	1	1	1	1	0.714785
																								17.3251	0.52075	11.3209	0.45298	11.5043	0.469037	16.2614	1	1	1	1	0.72253
																								17.371	0.555562	11.3668	0.457942	11.5501	0.553238	16.3881	1	1	1	1	0.730109
																								17.4168	0.462538	11.4126	0.484406	11.5959	0.556696	16.5148	1	1	1	1	0.737522
																								17.4626	0.561931	11.4584	0.480035	11.6418	0.539157	16.6415	1	1	1	1	0.744768
																								17.5085	0.628795	11.5043	0.444434	11.6876	0.55855	16.7682	1	1	1	1	0.751851
																								17.5543	0.544049	11.5501	0.453295	11.7334	0.514952	16.8948	1	1	1	1	0.758769
																								17.6001	0.560433	11.5959	0.445931	11.7793	0.519408	17.0215	1	1	1	1	0.765525
																								17.646	0.553007	11.6418	0.484603	11.8251	0.589314	17.1482	1	1	1	1	0.77212
																								17.6918	0.64586	11.6876	0.485627	11.8709	0.525539	17.2749	1	1	1	1	0.778557
																								17.7376	0.632882	11.7334	0.487202	11.9168	0.503223	17.4016	1	1	1	1	0.784836
																								17.7835	0.657271	11.7793	0.50134	11.9626	0.552169	17.5283	1	1	1	1	0.79096
																								17.8293	0.513836	11.8251	0.509177	12.0084	0.487752	17.6549	1	1	1	1	0.79693
																								17.8751	0.626377	11.8709	0.483934	12.0543	0.563006	17.7816	1	1	1	1	0.80275
																								17.921	0.611151	11.9168	0.389812	12.1001	0.611488	17.9083	1	1	1	1	0.808422
																								17.9668	0.624639	11.9626	0.443765	12.1459	0.632021	18.035	1	1	1	1	0.813947
																								18.0126	0.616226	12.0084	0.562461	12.1918	0.587175	18.1617	1	1	1	1	0.819328
																								18.0585	0.59303	12.0543	0.512367	12.2376	0.57288	18.2884	1	1	1	1	0.824569
																								18.1043	0.603623	12.1001	0.541234	12.2834	0.512171	18.4151	1	1	1	1	0.82967
																								18.1501	0.693002	12.1459	0.485115	12.3293	0.582113	18.5417	1	1	1	1	0.834636
																								18.196	0.667626	12.1918	0.550607	12.3751	0.575411	18.6684	1	1	1	1	0.839469
																								18.2418	0.60737	12.2376	0.56888	12.4209	0.625533	18.7951	1	1	1	1	0.844171
																								18.2876	0.630226	12.2834	0.584081	12.4668	0.603288	18.9218	1	1	1	1	0.848745
																								18.3335	0.672667	12.3293	0.602906	12.5126	0.664425	19.0485	1	1	1	1	0.853194
																								18.3793	0.646473	12.3751	0.533988	12.5584	0.682606	19.1752	1	1	1	1	0.85752
																								18.4251	0.666297	12.4209	0.670878	12.6043	0.604607	19.3018	1	1	1	1	0.861727
																								18.471	0.620143	12.4668	0.470544	12.6501	0.641575	19.4285	1	1	1	1	0.865816
																								18.5168	0.715312	12.5126	0.626417	12.6959	0.670129	19.5552	1	1	1	1	0.869792
																								18.5626	0.684827	12.5584	0.578213	12.7418	0.627779	19.6819	1	1	1	1	0.873655
																								18.6085	0.71487	12.6043	0.498387	12.7876	0.593735	19.8086	1	1	1	1	0.87741
																								18.6543	0.715619	12.6501	0.544857	12.8334	0.610454	19.9353	1	1	1	1	0.881059
																								18.7001	0.693172	12.6959	0.561437	12.8793	0.740749	20.0619	1	1	1	1	0.884603
																								18.746	0.709658	12.7418	0.629331	12.9251	0.621719	20.1886	1	1	1	1	0.888046
																								18.7918	0.686121	12.7876	0.552812	12.9709	0.627137	20.3153	1	1	1	1	0.891391
																								18.8377	0.740927	12.8334	0.61216	13.0168	0.726454	20.442	1	1	1	1	0.89464
																								18.8835	0.720183	12.8793	0.687773	13.0626	0.726026	20.5687	1	1	1	1	0.897795
																								18.9293	0.776215	12.9251	0.566438	13.1084	0.666814	20.6954	1	1	1	1	0.900858
																								18.9752	0.755199	12.9709	0.54978	13.1543	0.718575	20.8221	1	1	1	1	0.903833
																								19.021	0.706695	13.0168	0.630315	13.2001	0.741782	20.9487	1	1	1	1	0.906721
																								19.0668	0.74464	13.0626	0.650558	13.2459	0.781067	21.0754	1	1	1	1	0.909525
																								19.1127	0.74447	13.1084	0.61157	13.2918	0.774044	21.2021	1	1	1	1	0.912247
																								19.1585	0.727745	13.1543	0.601291	13.3376	0.710269	21.3288	1	1	1	1	0.91489
																								19.2043	0.765077	13.2001	0.592194	13.3834	0.714547	21.4555	1	1	1	1	0.917454
																								19.2502	0.771481	13.2459	0.64977	13.4293	0.714119	21.5822	1	1	1	1	0.919943
																								19.296	0.816579	13.2918	0.569628	13.4751	0.744955	21.7088	1	1	1	1	0.922359
																								19.3418	0.850777	13.3376	0.602473	13.5209	0.707596	21.8355	1	1	1	1	0.924704
																								19.3877	0.793893	13.3834	0.642366	13.5668	0.744634	21.9622	1	1	1	1	0.926979
																								19.4335	0.817362	13.4293	0.649652	13.6126	0.73476	22.0889	1	1	1	1	0.929186
																								19.4793	0.824277	13.4751	0.642681	13.6584	0.677045	22.2156	1	1	1	1	0.931329
																								19.5252	0.740041	13.5209	0.653984	13.7043	0.748056	22.3423	1	1	1	1	0.933407
																								19.571	0.808404	13.5668	0.641027	13.7501	0.718468	22.4689	1	1	1	1	0.935423
																								19.6168	0.789636	13.6126	0.672414	13.7959	0.697507	22.5956	1	1	1	1	0.93738
																								19.6627	0.799786	13.6584	0.678007	13.8418	0.79775	22.7223	1	1	1	1	0.939278
																								19.7085	0.74154	13.7043	0.651188	13.8876	0.77629	22.849	1	1	1	1	0.941119
																								19.7543	0.811367	13.7501	0.67139	13.9334	0.841206	22.9757	1	1	1	1	0.942905
																								19.8002	0.797572	13.7959	0.705377	13.9793	0.778821	23.1024	1	1	1	1	0.944638
																								19.846	0.84829	13.8418	0.754289	14.0251	0.780033	23.2291	1	1	1	1	0.946319
																								19.8918	0.767019	13.8876	0.678794	14.0709	0.793473	23.3557	1	1	1	1	0.947949
																								19.9377	0.857692	13.9334	0.731999	14.1168	0.765595	23.4824	1	1	1	1	0.94953
																								19.9835	0.818112	13.9793	0.687419	14.1626	0.794827	23.6091	1	1	1	1	0.951064
																								20.0293	0.812355	14.0251	0.709512	14.2084	0.810584	23.7358	1	1	1	1	0.952551
																								20.0752	0.828569	14.0709	0.625511	14.2543	0.747237	23.8625	1	1	1	1	0.953994
																								20.121	0.834666	14.1168	0.632009	14.3001	0.816608	23.9892	1	1	1	1	0.955393
																								20.1668	0.864095	14.1626	0.721366	14.3459	0.749233	24.1158	1	1	1	1	0.95675
																								20.2127	0.841308	14.2084	0.712347	14.3918	0.728985	24.2425	1	1	1	1	0.958066
																								20.2585	0.915495	14.2543	0.685804	14.4376	0.838425	24.3692	1	1	1	1	0.959343
																								20.3043	0.869068	14.3001	0.686867	14.4834	0.744242	24.4959	1	1	1	1	0.96058
																								20.3502	0.843965	14.3459	0.683993	14.5293	0.76146	24.6226	1	1	1	1	0.961781
																								20.396	0.869681	14.3918	0.673871	14.5751	0.716329	24.7493	1	1	1	1	0.962945
																								20.4418	0.834836	14.4376	0.72239	14.6209	0.756933	24.8759	1	1	1	1	0.964073
																								20.4877	0.910862	14.4834	0.699036	14.6668	0.771584	25.0026	1	1	1	1	0.965168
																								20.5335	0.846042	14.5293	0.824821	14.7126	0.842988	25.1293	1	1	1	1	0.966229
																								20.5793	0.84996	14.5751	0.778902	14.7585	0.827588	25.256	1	1	1	1	0.967258
																								20.6252	0.885248	14.6209	0.691633	14.8043	0.738324
																								20.671	0.871282	14.6668	0.668555	14.8501	0.867051
																								20.7168	0.913826	14.7126	0.686513	14.896	0.825699
																								20.7627	0.87462	14.7585	0.749563	14.9418	0.88213
																								20.8085	0.811504	14.8043	0.753265	14.9876	0.795932
																								20.8543	0.888484	14.8501	0.722665	15.0335	0.877175
																								20.9002	0.868081	14.896	0.716758	15.0793	0.865767
																								20.946	0.864845	14.9418	0.768466	15.1251	0.884982
																								20.9918	0.916619	14.9876	0.702699	15.171	0.843024
																								21.0377	0.87864	15.0335	0.759723	15.2168	0.827731
																								21.0835	0.889335	15.0793	0.775752	15.2626	0.83593
																								21.1293	0.846826	15.1251	0.757794	15.3085	0.88762
																								21.1752	0.934161	15.171	0.708882	15.3543	0.870509
																								21.221	0.961547	15.2168	0.721917	15.4001	0.798178
																								21.2668	0.936954	15.2626	0.721641	15.446	0.835252
																								21.3127	0.908716	15.3085	0.772759	15.4918	0.904588
																								21.3585	0.927927	15.3543	0.733613	15.5376	0.931147
																								21.4043	0.936715	15.4001	0.783471	15.5835	0.961376
																								21.4502	0.887598	15.446	0.748382	15.6293	0.917172
																								21.496	0.950783	15.4918	0.80072	15.6751	0.985118
																								21.5418	0.915461	15.5376	0.752753	15.721	0.849619
																								21.5877	0.899554	15.5835	0.846993	15.7668	0.872255
																								21.6335	0.846587	15.6293	0.723099	15.8126	0.917386
																								21.6793	0.893355	15.6751	0.776973	15.8585	0.828016
																								21.7252	0.945027	15.721	0.782801	15.9043	0.797144
																								21.771	0.888211	15.7668	0.730896	15.9501	0.846517
																								21.8168	0.891924	15.8126	0.786818	15.996	0.893894
																								21.8627	0.985118	15.8585	0.903545	16.0418	0.83322
																								21.9085	0.981439	15.9043	0.896142	16.0876	0.92637
																								21.9543	0.901836	15.9501	0.819269	16.1335	0.884412
																								22.0002	0.976364	15.996	0.796703	16.1793	0.870794
																								22.046	0.967814	16.0418	0.848175	16.2251	0.896175
																								22.0918	0.91478	16.0876	0.778863	16.271	0.902592
																								22.1377	0.963284	16.1335	0.728139	16.3168	0.929293
																								22.1835	0.920025	16.1793	0.857863	16.3626	0.95528
																								22.2293	0.934229	16.2251	0.843488	16.4085	0.903163
																								22.2752	0.917266	16.271	0.867393	16.4543	0.877175
																								22.321	0.894274	16.3168	0.799617	16.5001	0.942162
																								22.3668	0.959128	16.3626	0.835573	16.546	0.884055
																								22.4127	0.918084	16.4085	0.864361	16.5918	0.922912
																								22.4585	0.965668	16.4543	0.818442	16.6376	0.932786
																								22.5043	1.00062	16.5001	0.846914	16.6835	0.9951
																								22.5502	0.946934	16.546	0.839432	16.7293	0.881274
																								22.596	0.945231	16.5918	0.887123	16.7751	0.936066
																								22.6418	1.02804	16.6376	0.862825	16.821	0.890686
																								22.6877	0.945674	16.6835	0.822065	16.8668	0.968542
																								22.7335	0.947888	16.7293	0.777997	16.9126	0.959202
																								22.7793	0.904731	16.7751	0.810998	16.9585	0.902236
																								22.8252	0.98849	16.821	0.845103	17.0043	0.901915
																								22.871	0.99067	16.8668	0.811825	17.0501	0.809586
																								22.9168	0.998606	16.9126	0.835927	17.096	0.976349
																								22.9627	0.943596	16.9585	0.807178	17.1418	0.89475
																								23.0085	0.989069	17.0043	0.857311	17.1876	0.886764
																								23.0544	1.01472	17.0501	0.822577	17.2335	0.969112
																								23.1002	0.930686	17.096	0.900316	17.2793	0.954068
																								23.146	1.00147	17.1418	0.864164	17.3251	0.900952
																								23.1919	1.00334	17.1876	0.988373	17.371	0.995991
																								23.2377	0.914643	17.2335	0.885902	17.4168	0.998629
																								23.2835	1.0106	17.2793	0.851837	17.4626	0.889866
																								23.3294	1.00532	17.3251	0.887084	17.5085	0.910934
																								23.3752	1.05018	17.371	0.911461	17.5543	0.925585
																								23.421	0.978271	17.4168	0.850459	17.6001	0.859529
																								23.4669	1.00549	17.4626	0.82171	17.646	0.929756
																								23.5127	1.01066	17.5085	0.770868	17.6918	0.929756
																								23.5585	1.01036	17.5543	0.893149	17.7376	0.943338
																								23.6044	1.05828	17.6001	0.925481	17.7835	0.998985
																								23.6502	1.01594	17.646	0.842386	17.8293	0.951181
																								23.696	1.01094	17.6918	0.813991	17.8751	0.981482
																								23.7419	1.03652	17.7376	0.835257	17.921	0.932002
																								23.7877	1.0137	17.7835	0.901301	17.9668	0.95111
																								23.8335	1.00143	17.8293	0.909689	18.0126	1.01945
																								23.8794	1.07514	17.8751	0.861092	18.0585	0.950005
																								23.9252	0.938384	17.921	0.853924	18.1043	0.92391
																								23.971	0.994587	17.9668	0.90898	18.1501	0.987649
																								24.0169	0.998197	18.0126	0.911815	18.196	0.980448
																								24.0627	0.986139	18.0585	0.977583	18.2418	0.983835
																								24.1085	0.99084	18.1043	0.924693	18.2876	0.97011
																								24.1544	1.04994	18.1501	0.946747	18.3335	0.975172
																								24.2002	0.990295	18.196	0.923512	18.3793	0.909651
																								24.246	1.02885	18.2418	0.898819	18.4251	0.891078
																								24.2919	0.971833	18.2876	0.841401	18.471	0.964585
																								24.3377	1.07634	18.3335	0.923079	18.5168	0.913037
																								24.3835	0.975444	18.3793	0.986798	18.5626	1.01888
																								24.4294	1.06254	18.4251	0.88224	18.6085	0.98355
																								24.4752	1.03631	18.471	0.94974	18.6543	0.936708
																								24.521	0.956982	18.5168	0.785834	18.7001	0.995421
																								24.5669	0.952827	18.5626	0.910437	18.746	0.938383
																								24.6127	0.998402	18.6085	0.971518	18.7918	0.934141
																								24.6585	1.02606	18.6543	0.83699	18.8377	0.997916
																								24.7044	1.00555	18.7001	0.969746	18.8835	1.02055
																								24.7502	0.961002	18.746	0.870858	18.9293	0.964442
																								24.796	1.02231	18.7918	0.846836	18.9752	0.992177
																								24.8419	0.97575	18.8377	0.892361	19.021	0.940914
																								24.8877	0.923772	18.8835	0.871922	19.0668	0.898029
																								24.9335	1.0154	18.9293	0.988137	19.1127	0.97642
																								24.9794	0.998027	18.9752	0.882279	19.1585	0.994102
																								25.0252	1.06414	19.021	0.956277	19.2043	0.903483
																								25.071	1.02933	19.0668	0.917762	19.2502	1.01955
																								25.1169	1.0312	19.1127	0.956592	19.296	0.83871
																								25.1627	0.968836	19.1585	0.861683	19.3418	0.912289
																								25.2085	0.949489	19.2043	0.893739	19.3877	0.986794
																								25.2544	1.05518	19.2502	0.954308	19.4335	1.0269
																										19.296	0.957577	19.4793	1.02772
																										19.3418	0.953717	19.5252	1.00669
																										19.3877	0.961988	19.571	0.963551
																										19.4335	0.910988	19.6168	0.939274
																										19.4793	0.962696	19.6627	0.960699
																										19.5252	0.899646	19.7085	0.952571
																										19.571	1.00594	19.7543	0.942661
																										19.6168	0.952694	19.8002	1.00323
																										19.6627	0.953993	19.846	0.991428
																										19.7085	1.0098	19.8918	0.971001
																										19.7543	1.01098	19.9377	1.06846
																										19.8002	0.874521	19.9835	0.985296
																										19.846	0.895236	20.0293	0.957526
																										19.8918	1.01937	20.0752	1.10048
																										19.9377	1.00523	20.121	0.949612
																										19.9835	0.972148	20.1668	0.951502
																										20.0293	0.978922	20.2127	0.957348
																										20.0752	0.95482	20.2585	0.98437
																										20.121	0.987507	20.3043	1.01881
																										20.1668	0.957065	20.3502	1.07577
																										20.2127	0.981285	20.396	0.991891
																										20.2585	0.928119	20.4418	1.05474
																										20.3043	1.04193	20.4877	0.962268
																										20.3502	0.996643	20.5335	0.901879
																										20.396	1.01374	20.5793	1.01816
																										20.4418	1.01259	20.6252	1.01881
																										20.4877	0.97203	20.671	1.03495
																										20.5335	0.968328	20.7168	1.02415
																										20.5793	1.02425	20.7627	0.925514
																										20.6252	1.02795	20.8085	1.04155
																										20.671	0.962736	20.8543	1.01827
																										20.7168	1.03492	20.9002	0.882237
																										20.7627	0.966398	20.946	0.983407
																										20.8085	0.984041	20.9918	1.05253
																										20.8543	0.989003	21.0377	0.943267
																										20.9002	1.02405	21.0835	1.00786
																										20.946	1.01255	21.1293	1.04101
																										20.9918	0.92044	21.1752	0.984405
																										21.0377	1.04055	21.221	1.01136
																										21.0835	1.00511	21.2668	0.982088
																										21.1293	1.02811	21.3127	0.965298
																										21.1752	0.989555	21.3585	0.972677
																										21.221	1.04792	21.4043	1.00262
																										21.2668	0.917841	21.4502	1.01075
																										21.3127	0.995738	21.496	0.955601
																										21.3585	0.933003	21.5418	1.00227
																										21.4043	0.951591	21.5877	1.11648
																										21.4502	0.93698	21.6335	0.998344
																										21.496	1.03311	21.6793	0.995741
																										21.5418	0.947377	21.7252	0.96487
																										21.5877	0.982309	21.771	0.989432
																										21.6335	1.04662	21.8168	0.995421
																										21.6793	0.945684	21.8627	0.999877
																										21.7252	0.932215	21.9085	0.992248
																										21.771	1.05201	21.9543	1.0418
																										21.8168	1.04028	22.0002	0.942768
																										21.8627	1.00224	22.046	1.00162
																										21.9085	0.993729	22.0918	0.974138
																										21.9543	1.03756	22.1377	0.99321
																										22.0002	0.937177	22.1835	0.936316
																										22.046	0.969352	22.2293	1.02005
																										22.0918	0.945054	22.2752	1.00954
																										22.1377	0.902009	22.321	1.0957
																										22.1835	1.01665	22.3668	1.06223
																										22.2293	1.06788	22.4127	1.05338
																										22.2752	0.951079	22.4585	1.02369
																										22.321	0.985853	22.5043	1.01799
																										22.3668	0.98601	22.5502	0.976277
																										22.4127	0.996722	22.596	0.835858
																										22.4585	0.948243
																										22.5043	0.989397
																										22.5502	0.925481
																										22.596	0.988491
																										22.6418	0.955962
																										22.6877	0.996722
																										22.7335	1.03043
																										22.7793	1.00188
																										22.8252	1.02787
																										22.871	0.970652
																										22.9168	0.974747
																										22.9627	0.920952
																										23.0085	0.980221
																										23.0544	0.972975
																										23.1002	0.974905
																										23.146	1.03933
																										23.1919	0.93253
																										23.2377	1.01736
																										23.2835	0.983136
																										23.3294	1.03725
																										23.3752	1.02661
																										23.421	1.03516
																										23.4669	0.99369
																										23.5127	0.953599
																										23.5585	1.02267
																										23.6044	1.01078

## Sheet: Fig. 6c
2 uM Ab control						Dam_015 0.5 uM						Dam_015 1 uM						Dam_015 1.5 uM						Dam_015 3 uM						Fits
time / h	relative aggregate conc	time / h	relative aggregate conc	time / h	relative aggregate conc	time / h	relative aggregate conc	time / h	relative aggregate conc	time / h	relative aggregate conc	time / h	relative aggregate conc	time / h	relative aggregate conc	time / h	relative aggregate conc	time / h	relative aggregate conc	time / h	relative aggregate conc	time / h	relative aggregate conc	time / h	relative aggregate conc	time / h	relative aggregate conc	time / h	relative aggregate conc	time / h	2 uM Ab control	Dam_015 0.5 uM	Dam_015 1 uM	Dam_015 1.5 uM	Dam_015 3 uM
0.229168	-0.00601208	0.229168	0.00204093	0.275002	-0.00750564	0.229168	0.00341334	0.412503	-0.00477632	0.412503	0.00114921	0.50417	-0.00511812	0.412503	-0.00331357	0.366669	0.0183126	0.641671	-0.00715811	0.641671	-0.015719	0.595837	-0.00163885	0.962507	-0.0178386	0.87084	-0.0163852	0.641671	0.0216156	0.19198	0.000152821	7.74961e-05	5.09788e-05	3.6464e-05	1.4656e-05
0.275002	0.00647813	0.275002	-0.00324184	0.320835	0.00720518	0.275002	0.00565431	0.458336	0.000925698	0.458336	0.0050121	0.550004	0.0146186	0.458336	-0.00358545	0.412503	-0.0114883	0.687505	0.00911077	0.687505	0.0132262	0.641671	-0.020899	1.00834	-0.00912911	0.916673	0.0628639	0.687505	0.0101935	0.265417	0.000448709	0.000169649	0.000102628	7.24222e-05	2.81956e-05
0.320835	-0.000466053	0.320835	0.00120091	0.366669	0.000300459	0.320835	-0.00906764	0.50417	0.00385062	0.50417	-0.00616131	0.595837	-0.0095005	0.50417	0.00689901	0.458336	-0.00682432	0.733339	-0.00195266	0.733339	0.00249282	0.687505	0.0225379	1.05417	0.0115999	0.962507	-0.0372589	0.733339	0.00398666	0.338855	0.00123313	0.000329067	0.000178997	0.000124125	4.63529e-05
0.366669	-0.00710264	0.366669	-0.0111287	0.412503	0.0066276	0.366669	0.00523931	0.550004	0.00743022	0.550004	0.000415261	0.641671	0.013627	0.550004	0.013934	0.50417	-0.0177574	0.779172	0.000998576	0.779172	-0.00377892	0.733339	-0.018651	1.10001	-0.0156936	1.00834	0.0167282	0.779172	0.00224258	0.412292	0.00330413	0.000600191	0.00028791	0.000195466	6.93566e-05
0.412503	0.00621714	0.412503	-0.0251943	0.458336	-0.00436395	0.412503	-0.000321621	0.595837	-0.00602232	0.595837	-0.00919369	0.687505	0.010924	0.595837	-0.0262027	0.550004	0.00860611	0.825006	-0.0293146	0.825006	0.00395357	0.779172	-0.0179114	1.14584	0.00222467	1.05417	0.00897169	0.825006	0.00292653	0.485729	0.0087357	0.00105846	0.000440512	0.000291811	9.74965e-05
0.458336	-0.00507997	0.458336	0.00517699	0.50417	0.0160527	0.458336	0.0019816	0.641671	0.00665939	0.641671	-0.00817968	0.733339	0.0120436	0.641671	-0.0107224	0.595837	-0.00594604	0.87084	-0.0080331	0.87084	-0.00206411	0.825006	-0.0172007	1.19168	-0.00158458	1.10001	-0.00663617	0.87084	-0.0246197	0.559166	0.0227457	0.00183095	0.000652402	0.000420405	0.000131127
0.50417	-0.0026565	0.50417	-0.00213115	0.550004	0.0193956	0.50417	-0.010157	0.687505	0.025381	0.687505	0.00109127	0.779172	-0.00622171	0.687505	-0.0164829	0.641671	0.0123161	0.916673	-0.0068615	0.916673	-0.00835173	0.87084	-0.0187525	1.23751	0.0179609	1.14584	-0.00571108	0.916673	-0.0185496	0.632604	0.0573986	0.00313071	0.000945211	0.000590908	0.000170673
0.550004	0.00656202	0.550004	-0.00706859	0.595837	0.0586537	0.550004	-0.0244847	0.733339	0.00267854	0.733339	-0.0142348	0.825006	0.000127953	0.733339	-0.0244524	0.687505	-0.0115488	0.962507	-0.0219885	0.962507	0.0218002	0.916673	-0.0236256	1.28334	0.0142626	1.19168	0.0104898	0.962507	-0.00447727	0.706041	0.135074	0.00531286	0.00134876	0.000816113	0.000216632
0.595837	0.0484788	0.595837	0.00467298	0.641671	0.105945	0.595837	-0.0119415	0.779172	0.0497202	0.779172	0.0062096	0.87084	-0.00308686	0.779172	0.00214107	0.733339	-0.0166974	1.00834	0.00888832	1.00834	0.0115749	0.962507	0.00482954	1.32918	0.00470253	1.23751	-0.00476228	1.00834	0.0288142	0.779478	0.277819	0.00896428	0.00190403	0.00111289	0.000269583
0.641671	0.0881306	0.641671	0.0349603	0.687505	0.205981	0.641671	-0.0127196	0.825006	0.0358558	0.825006	0.0116853	0.916673	0.0156103	0.825006	0.0119968	0.779172	-0.00998915	1.05417	0.0218649	1.05417	0.0417745	1.00834	-0.0131978	1.37501	-0.0048021	1.28334	-0.000824732	1.05417	0.00321721	0.852916	0.470358	0.0150411	0.00266719	0.00150341	0.000330192
0.687505	0.132284	0.687505	0.0671889	0.733339	0.265848	0.687505	-0.00461682	0.87084	0.0558762	0.87084	0.0177693	0.962507	0.0261984	0.87084	-0.0110792	0.825006	0.0137698	1.10001	0.0251869	1.10001	0.0386625	1.05417	-0.0175343	1.42084	0.00747625	1.32918	-0.00177354	1.10001	-0.01896	0.926353	0.655002	0.025064	0.00371498	0.00201679	0.000399223
0.733339	0.172029	0.733339	0.126317	0.779172	0.374442	0.733339	0.000663992	0.916673	0.110341	0.916673	0.0314922	1.00834	0.0317963	0.916673	0.0232119	0.87084	0.01592	1.14584	0.0639237	1.14584	0.0516981	1.10001	-0.00703401	1.46668	-0.00543081	1.37501	-0.03242	1.14584	-0.00259639	0.99979	0.791316	0.0413556	0.00515196	0.00269113	0.000477545
0.779172	0.266862	0.779172	0.231478	0.825006	0.464238	0.779172	0.0182805	0.962507	0.12732	0.962507	0.0492712	1.05417	0.0339875	0.962507	0.0213258	0.916673	0.0171769	1.19168	0.0340257	1.19168	0.0403773	1.14584	-0.0153008	1.51251	-0.00374808	1.42084	0.00671828	1.19168	-0.00379331	1.07323	0.878183	0.0672234	0.00712002	0.00357625	0.000566141
0.825006	0.350863	0.825006	0.350135	0.87084	0.596583	0.825006	0.0271614	1.00834	0.144131	1.00834	0.0707296	1.10001	0.0464949	1.00834	0.00671209	0.962507	0.0173737	1.23751	0.0641165	1.23751	0.0245312	1.19168	0.0345319	1.55835	0.0251911	1.46668	0.00370582	1.23751	-0.00900846	1.14666	0.92994	0.106832	0.0098106	0.00473709	0.000666125
0.87084	0.466239	0.87084	0.459766	0.916673	0.664361	0.87084	0.0682045	1.05417	0.169262	1.05417	0.0864709	1.14584	0.0527006	1.05417	0.00654217	1.00834	0.0653459	1.28334	0.0833218	1.28334	0.0527143	1.23751	0.0359968	1.60418	0.0109527	1.51251	0.0351825	1.28334	-0.0170278	1.2201	0.959942	0.164314	0.0134802	0.00625809	0.000778752
0.916673	0.551014	0.916673	0.619827	0.962507	0.778328	0.916673	0.0600913	1.10001	0.211953	1.10001	0.104231	1.19168	0.0964605	1.10001	0.0315214	1.05417	0.0517629	1.32918	0.106161	1.32918	0.077309	1.28334	0.0606811	1.65001	-0.0124206	1.55835	0.0279953	1.32918	0.0114247	1.29354	0.977147	0.241796	0.0184688	0.00824861	0.000905436
0.962507	0.665635	0.962507	0.716317	1.00834	0.826635	0.962507	0.106996	1.14584	0.243842	1.14584	0.146558	1.23751	0.0764039	1.14584	0.0731873	1.10001	0.0212503	1.37501	0.103966	1.37501	0.0768009	1.32918	0.0190571	1.69585	0.0343074	1.60418	0.00783313	1.37501	0.00234517	1.36698	0.986974	0.336993	0.0252211	0.0108496	0.00104776
1.00834	0.769518	1.00834	0.777507	1.05417	0.866112	1.00834	0.146898	1.19168	0.298898	1.19168	0.175501	1.28334	0.102986	1.19168	0.062363	1.14584	0.0546248	1.42084	0.125529	1.42084	0.113764	1.37501	0.0517761	1.74168	0.0279833	1.65001	-0.00637525	1.42084	0.00102856	1.44041	0.992577	0.442411	0.034307	0.0142417	0.00120752
1.05417	0.835017	1.05417	0.864459	1.10001	0.937487	1.05417	0.189144	1.23751	0.327408	1.23751	0.208345	1.32918	0.108632	1.23751	0.0905538	1.19168	0.106125	1.46668	0.116245	1.46668	0.120703	1.42084	0.0690494	1.78751	-0.00363713	1.69585	0.00584063	1.46668	0.0174606	1.51385	0.995771	0.547736	0.0464377	0.0186542	0.00138669
1.10001	0.903788	1.10001	0.892356	1.14584	0.961658	1.10001	0.21116	1.28334	0.35576	1.28334	0.253889	1.37501	0.128417	1.28334	0.0951078	1.23751	0.0800343	1.51251	0.153247	1.51251	0.122942	1.46668	0.0862066	1.83335	0.0361566	1.74168	0.0606342	1.51251	0.0160243	1.58729	0.997591	0.643912	0.0624662	0.0243751	0.00158753
1.14584	0.965876	1.14584	0.948675	1.19168	0.959313	1.14584	0.241226	1.32918	0.408388	1.32918	0.296052	1.42084	0.137357	1.32918	0.122891	1.28334	0.0997199	1.55835	0.12851	1.55835	0.139201	1.51251	0.0948794	1.87918	0.0527804	1.78751	0.0427966	1.55835	-0.00673432	1.66073	0.998627	0.725751	0.0833607	0.0317609	0.00181253
1.19168	0.952369	1.19168	0.974585	1.23751	1.00038	1.19168	0.274924	1.37501	0.473581	1.37501	0.332441	1.46668	0.192089	1.37501	0.119577	1.32918	0.134942	1.60418	0.186452	1.60418	0.161557	1.55835	0.110311	1.92501	0.0195697	1.83335	0.024461	1.60418	0.00361049	1.73416	0.999218	0.791956	0.11013	0.0412443	0.00206449
1.23751	1.00189	1.23751	1.00681	1.28334	1.00661	1.23751	0.320241	1.42084	0.505343	1.42084	0.359973	1.51251	0.190394	1.42084	0.154497	1.37501	0.130081	1.65001	0.165393	1.65001	0.155412	1.60418	0.10947	1.97085	0.0052018	1.87918	0.0134311	1.65001	0.0470929	1.8076	0.999554	0.843727	0.143688	0.0533364	0.00234655
1.28334	0.989784	1.28334	0.984245	1.32918	0.975345	1.28334	0.375052	1.46668	0.536113	1.46668	0.389573	1.55835	0.227932	1.46668	0.190623	1.42084	0.124766	1.69585	0.183367	1.69585	0.1684	1.65001	0.133617	2.01668	0.0278724	1.92501	0.0324547	1.69585	0.0227954	1.88104	0.999746	0.883339	0.184657	0.0686199	0.00266219
1.32918	1.02219	1.32918	0.979242	1.37501	1.00104	1.32918	0.396777	1.51251	0.592605	1.51251	0.415464	1.60418	0.201878	1.51251	0.186205	1.46668	0.133549	1.74168	0.218322	1.74168	0.202204	1.69585	0.173834	2.06252	0.0470296	1.97085	0.036582	1.74168	0.0188969	1.95447	0.999855	0.913241	0.233133	0.0877262	0.00301532
1.37501	1.04338	1.37501	1.04243	1.42084	1.0212	1.37501	0.448091	1.55835	0.631896	1.55835	0.45247	1.65001	0.288374	1.55835	0.217353	1.51251	0.162168	1.78751	0.223558	1.78751	0.18939	1.74168	0.177953	2.10835	0.0729916	2.01668	0.0288492	1.78751	0.0313448	2.02791	0.999918	0.935627	0.288497	0.111291	0.0034103
1.42084	1.05808	1.42084	0.988221	1.46668	1.01823	1.42084	0.470584	1.60418	0.668357	1.60418	0.516952	1.69585	0.274843	1.60418	0.238645	1.55835	0.185988	1.83335	0.260159	1.83335	0.230069	1.78751	0.176793	2.15418	0.0590305	2.06252	0.0232512	1.83335	0.0188969	2.10135	0.999953	0.952303	0.349342	0.139882	0.00385197
1.46668	1.00795	1.46668	1.02245	1.51251	0.995298	1.46668	0.538249	1.65001	0.716286	1.65001	0.542959	1.74168	0.304192	1.65001	0.291883	1.60418	0.193438	1.87918	0.229549	1.87918	0.241025	1.83335	0.216387	2.20002	0.0599921	2.10835	0.0449552	1.87918	0.0199057	2.17479	0.999973	0.964688	0.413608	0.173906	0.00434575
1.51251	0.994631	1.51251	1.02387	1.55835	0.998326	1.51251	0.582933	1.69585	0.752547	1.69585	0.560815	1.78751	0.334805	1.69585	0.250624	1.65001	0.224935	1.92501	0.256466	1.92501	0.270844	1.87918	0.245552	2.24585	0.0650218	2.15418	0.0376494	1.92501	0.0356537	2.24822	0.999985	0.97387	0.478883	0.213496	0.00489766
1.55835	0.997418	1.55835	1.00364	1.60418	1.00929	1.55835	0.603963	1.74168	0.794404	1.74168	0.632684	1.83335	0.331382	1.74168	0.285052	1.69585	0.220195	1.97085	0.282048	1.97085	0.269224	1.92501	0.222666	2.29168	0.0622111	2.20002	0.0241052	1.97085	0.0494183	2.32166	0.999991	0.98067	0.542795	0.258417	0.0055144
		1.60418	1.01438	1.65001	0.992384	1.60418	0.657093	1.78751	0.824286	1.78751	0.676199	1.87918	0.370248	1.78751	0.339275	1.74168	0.239608	2.01668	0.26615	2.01668	0.298646	1.97085	0.259794	2.33752	0.0755434	2.24585	0.0720436	2.01668	0.0476229	2.3951	0.999995	0.985703	0.60335	0.308004	0.00620342
		1.65001	0.991404			1.65001	0.70267	1.83335	0.832892	1.83335	0.694867	1.92501	0.368169	1.83335	0.358154	1.78751	0.267577	2.06252	0.335052	2.06252	0.304092	2.01668	0.274559	2.38335	0.0842529	2.29168	0.0261214	2.06252	0.0502904	2.46854	0.999997	0.989426	0.659126	0.361182	0.006973
		1.69585	0.994213			1.69585	0.747697	1.87918	0.865499	1.87918	0.729729	1.97085	0.38693	1.87918	0.406481	1.83335	0.272619	2.10835	0.310078	2.10835	0.371144	2.06252	0.282724	2.42919	0.1001	2.33752	0.0842358	2.10835	0.0747588	2.54197	0.999998	0.992181	0.709311	0.416563	0.00783234
						1.74168	0.759835	1.92501	0.930925	1.92501	0.740584	2.01668	0.402316	1.92501	0.442607	1.87918	0.307115	2.15418	0.355681	2.15418	0.342373	2.10835	0.318619	2.47502	0.0701069	2.38335	0.0211164	2.15418	0.0611823	2.61541	0.999999	0.994218	0.75362	0.472603	0.00879163
						1.78751	0.813681	1.97085	0.906142	1.97085	0.78493	2.06252	0.448667	1.97085	0.457986	1.92501	0.301587	2.20002	0.347154	2.20002	0.343659	2.15418	0.315689	2.52085	0.0818121	2.42919	0.059804	2.20002	0.0596092	2.68885	0.999999	0.995724	0.792167	0.527794	0.00986216
						1.83335	0.819076	2.01668	0.949097	2.01668	0.813004	2.10835	0.432465	2.01668	0.474299	1.97085	0.295364	2.24585	0.36799	2.24585	0.386879	2.20002	0.340707	2.56669	0.102985	2.47502	0.0553683	2.24585	0.0596605	2.76229	1	0.996838	0.825319	0.580819	0.0110564
						1.87918	0.832916	2.06252	0.979677	2.06252	0.853033	2.15418	0.462454	2.06252	0.504376	2.01668	0.32091	2.29168	0.402901	2.29168	0.411156	2.24585	0.374616	2.61252	0.113802	2.52085	0.0567441	2.29168	0.110666	2.83572	1	0.997662	0.853585	0.63066	0.0123882
						1.92501	0.88588	2.10835	0.986614	2.10835	0.846176	2.20002	0.507093	2.10835	0.519125	2.06252	0.365353	2.33752	0.435468	2.33752	0.432718	2.29168	0.39273	2.65835	0.0965683	2.56669	0.0620811	2.33752	0.0840948	2.90916	1	0.998271	0.877528	0.676632	0.0138728
						1.97085	0.882819	2.15418	1.00743	2.15418	0.879658	2.24585	0.515682	2.15418	0.561114	2.10835	0.36022	2.38335	0.421023	2.38335	0.417015	2.33752	0.426827	2.70419	0.115041	2.61252	0.0681061	2.38335	0.112735	2.9826	1	0.998722	0.897711	0.71837	0.0155268
						2.01668	0.914317	2.20002	0.980754	2.20002	0.885095	2.29168	0.578811	2.20002	0.564037	2.15418	0.360356	2.42919	0.418947	2.42919	0.42597	2.38335	0.450119	2.75002	0.12168	2.65835	0.0480151	2.42919	0.0828466	3.05603	1	0.999055	0.914663	0.755772	0.0173688
						2.06252	0.956813	2.24585	0.988452	2.24585	0.911479	2.33752	0.58812	2.24585	0.599246	2.20002	0.365611	2.47502	0.45982	2.47502	0.465394	2.42919	0.412686	2.79585	0.120681	2.70419	0.103971	2.47502	0.121883	3.12947	1	0.999301	0.928865	0.788936	0.0194189
						2.10835	0.941437	2.29168	0.99295	2.29168	0.910069	2.38335	0.581786	2.29168	0.605737	2.24585	0.415218	2.52085	0.495768	2.52085	0.488735	2.47502	0.451294	2.84169	0.119442	2.75002	0.0835242	2.52085	0.137683	3.20291	1	0.999483	0.940739	0.818096	0.0216992
						2.15418	0.946998	2.33752	1.00298	2.33752	0.907751	2.42919	0.602642	2.33752	0.611463	2.29168	0.406708	2.56669	0.470809	2.56669	0.528699	2.52085	0.471235	2.88752	0.117001	2.79585	0.0812945	2.56669	0.129509	3.27635	1	0.999618	0.950653	0.843565	0.0242338
						2.20002	0.988041	2.38335	0.98974	2.38335	0.96581	2.47502	0.616285	2.38335	0.647963	2.33752	0.429574	2.61252	0.49559	2.61252	0.535384	2.56669	0.461141	2.93336	0.15428	2.84169	0.0784243	2.61252	0.128671	3.34978	1	0.999717	0.958921	0.865693	0.027049
						2.24585	0.998302	2.42919	0.988272	2.42919	0.947336	2.52085	0.622459	2.42919	0.656817	2.38335	0.459117	2.65835	0.536967	2.65835	0.522253	2.61252	0.530263	2.97919	0.149731	2.88752	0.108501	2.65835	0.144197	3.42322	1	0.999791	0.965812	0.884842	0.030173
						2.29168	1.00297	2.47502	1.00491	2.47502	0.935882	2.56669	0.655279	2.47502	0.734065	2.42919	0.436857	2.70419	0.522181	2.70419	0.562852	2.65835	0.518965	3.02502	0.140633	2.93336	0.0830735	2.70419	0.110649	3.49666	1	0.999845	0.971552	0.90136	0.0336365
						2.33752	0.982397	2.52085	0.990236	2.52085	0.996935	2.61252	0.686435	2.52085	0.711771	2.47502	0.505832	2.75002	0.571774	2.75002	0.534939	2.70419	0.567652	3.07086	0.155094	2.97919	0.0975428	2.75002	0.134827	3.5701	1	0.999886	0.976331	0.915574	0.0374724
						2.38335	1.02305	2.56669	0.990405	2.56669	1.00427	2.65835	0.679366	2.56669	0.771891	2.52085	0.534725	2.79585	0.604875	2.79585	0.613185	2.75002	0.588928	3.11669	0.203116	3.02502	0.128972	2.79585	0.143924	3.64353	1	0.999916	0.980309	0.927782	0.0417158
						2.42919	0.976131	2.61252	0.972518	2.61252	0.989461	2.70419	0.690338	2.61252	0.74839	2.56669	0.518022	2.84169	0.567859	2.84169	0.579683	2.79585	0.539676	3.16252	0.170867	3.07086	0.0752458	2.84169	0.149293	3.71697	1	0.999938	0.98362	0.938253	0.0464043
						2.47502	0.963027	2.65835	1.00229	2.65835	1.01298	2.75002	0.719463	2.65835	0.786301	2.61252	0.539692	2.88752	0.598528	2.88752	0.633286	2.84169	0.606956	3.20836	0.205816	3.11669	0.120789	2.88752	0.168683	3.79041	1	0.999954	0.986374	0.947225	0.051577
						2.52085	1.03355	2.70419	1.02519	2.70419	0.993053	2.79585	0.74016	2.70419	0.824058	2.65835	0.545506	2.93336	0.627996	2.93336	0.648783	2.88752	0.618138	3.25419	0.210568	3.16252	0.103473	2.93336	0.173419	3.86384	1	0.999966	0.988666	0.954905	0.0572755
						2.56669	1.00343			2.75002	1.01046	2.84169	0.756282	2.75002	0.798756	2.70419	0.581864	2.97919	0.609235	2.97919	0.662311	2.93336	0.646839	3.30003	0.200509	3.20836	0.206561	2.97919	0.154149	3.93728	1	0.999975	0.990573	0.961475	0.0635425
										2.79585	1.00141	2.88752	0.777282	2.79585	0.831722	2.75002	0.562966	3.02502	0.616843	3.02502	0.6575	2.97919	0.617485	3.34586	0.235587	3.25419	0.152574	3.02502	0.207719	4.01072	1	0.999981	0.992159	0.967093	0.070422
										2.84169	1.02385	2.93336	0.78795	2.84169	0.865367	2.79585	0.612786	3.07086	0.670885	3.07086	0.685207	3.02502	0.649595	3.39169	0.209533	3.30003	0.168585	3.07086	0.201359	4.08416	1	0.999986	0.993478	0.971895	0.0779589
										2.88752	0.989103	2.97919	0.7705	2.88752	0.855138	2.84169	0.615163	3.11669	0.651428	3.11669	0.70661	3.07086	0.671451	3.43753	0.239101	3.34586	0.114621	3.11669	0.180242	4.15759	1	0.99999	0.994575	0.975998	0.0861979
										2.93336	1.00429	3.02502	0.823265	2.93336	0.897381	2.88752	0.6133	3.16252	0.671063	3.16252	0.657468	3.11669	0.666346	3.48336	0.228708	3.39169	0.133408	3.16252	0.177831	4.23103	1	0.999992	0.995488	0.979504	0.0951829
										2.97919	0.992503	3.07086	0.82029	2.97919	0.894646	2.93336	0.649083	3.20836	0.659688	3.20836	0.718328	3.16252	0.741864	3.52919	0.24744	3.43753	0.142967	3.20836	0.213277	4.30447	1	0.999994	0.996247	0.982498	0.104956
										3.02502	1.01132	3.11669	0.827711	3.02502	0.867559	2.97919	0.644903	3.25419	0.68008	3.25419	0.727712	3.20836	0.639602	3.57503	0.216042	3.48336	0.177029	3.25419	0.215602	4.37791	1	0.999996	0.996879	0.985056	0.115558
										3.07086	0.996173	3.16252	0.827823	3.07086	0.940441	3.02502	0.702173	3.30003	0.695148	3.30003	0.767041	3.25419	0.669319	3.62086	0.258813	3.52919	0.172854	3.30003	0.199922	4.45134	1	0.999997	0.997404	0.98724	0.127024
												3.20836	0.879276	3.11669	0.896923	3.07086	0.736547	3.34586	0.748819	3.34586	0.747606	3.30003	0.677064	3.6667	0.290082	3.57503	0.156132	3.34586	0.242841	4.52478	1	0.999998	0.997841	0.989105	0.139384
												3.25419	0.884411	3.16252	0.950908	3.11669	0.665361	3.39169	0.717838	3.39169	0.761261	3.34586	0.734772	3.71253	0.263214	3.62086	0.160781	3.39169	0.224032	4.59822	1	0.999998	0.998204	0.990698	0.152664
												3.30003	0.900197	3.20836	0.94389	3.16252	0.711577	3.43753	0.715317	3.43753	0.805624	3.39169	0.746519	3.75836	0.291025	3.6667	0.179211	3.43753	0.224835	4.67165	1	0.999999	0.998506	0.992058	0.166879
												3.34586	0.862675	3.25419	0.968071	3.20836	0.693496	3.48336	0.735486	3.48336	0.78114	3.43753	0.761617	3.8042	0.276731	3.71253	0.162631	3.48336	0.211772	4.74509	1	0.999999	0.998758	0.993219	0.182038
												3.39169	0.900437	3.30003	0.984214	3.25419	0.748722	3.52919	0.795593	3.52919	0.778616	3.48336	0.766287	3.85003	0.279837	3.75836	0.195412	3.52919	0.266899	4.81853	1	0.999999	0.998967	0.994211	0.198137
												3.43753	0.879292	3.34586	1.00967	3.30003	0.771572	3.57503	0.765236	3.57503	0.790937	3.52919	0.803879	3.89586	0.307593	3.8042	0.16339	3.57503	0.224938	4.89197	1	1	0.999141	0.995057	0.215164
												3.48336	0.918958	3.39169	0.997621	3.34586	0.775358	3.62086	0.792924	3.62086	0.805068	3.57503	0.806562	3.9417	0.319169	3.85003	0.165264	3.62086	0.250467	4.9654	1	1	0.999285	0.99578	0.233091
												3.52919	0.953201	3.43753	0.953865	3.39169	0.832219	3.6667	0.78413	3.6667	0.81804	3.62086	0.816381	3.98753	0.292671	3.89586	0.19629	3.6667	0.239831	5.03884	1	1	0.999405	0.996397	0.251882
												3.57503	0.942917	3.48336	1.0294	3.43753	0.856447	3.71253	0.823697	3.71253	0.856989	3.6667	0.825953	4.03336	0.331669	3.9417	0.161469	3.71253	0.29294	5.11228	1	1	0.999506	0.996924	0.271484
												3.62086	0.928858	3.52919	0.99271	3.48336	0.835308	3.75836	0.812307	3.75836	0.886442	3.71253	0.81744	4.0792	0.34391	3.98753	0.209834	3.75836	0.272285	5.18572	1	1	0.999589	0.997374	0.291835
												3.6667	0.920445	3.57503	0.970263	3.52919	0.851404	3.8042	0.816252	3.8042	0.843032	3.75836	0.808085	4.12503	0.311865	4.03336	0.192922	3.8042	0.288734	5.25915	1	1	0.999658	0.997758	0.312859
												3.71253	0.9243	3.62086	1.02996	3.57503	0.862716	3.85003	0.818773	3.85003	0.866611	3.8042	0.890376	4.17087	0.353545	4.0792	0.159358	3.85003	0.274627	5.33259	1	1	0.999715	0.998086	0.334473
												3.75836	0.927163	3.6667	0.991962	3.62086	0.918896	3.89586	0.816415	3.89586	0.877471	3.85003	0.808926	4.2167	0.332557	4.12503	0.218444	3.89586	0.30113	5.40603	1	1	0.999763	0.998366	0.356582
												3.8042	0.957248	3.71253	1.01772	3.6667	0.888868	3.9417	0.830044	3.9417	0.901589	3.89586	0.842965	4.26253	0.306927	4.17087	0.201224	3.9417	0.315134	5.47946	1	1	0.999803	0.998605	0.379085
												3.85003	0.90709	3.75836	0.98367	3.71253	0.954617	3.98753	0.822718	3.98753	0.891301	3.9417	0.873639	4.30837	0.351843	4.2167	0.199018	3.98753	0.292376	5.5529	1	1	0.999836	0.998809	0.401877
												3.89586	0.947971	3.8042	0.981121	3.75836	0.915034	4.03336	0.834582	4.03336	0.868897	3.98753	0.897932	4.3542	0.395409	4.26253	0.194179	4.03336	0.311031	5.62634	1	1	0.999864	0.998983	0.424849
												3.9417	0.942709	3.85003	0.97463	3.8042	0.921076	4.0792	0.859127	4.0792	0.887363	4.03336	0.900223	4.40003	0.403102	4.30837	0.264556	4.0792	0.301404	5.69978	1	1	0.999887	0.999132	0.447893
												3.98753	0.977896	3.89586	1.02547	3.85003	0.938309	4.12503	0.845572	4.12503	0.889221	4.0792	0.894611	4.44587	0.387033	4.3542	0.203643	4.12503	0.344391	5.77321	1	1	0.999906	0.999259	0.470901
												4.03336	0.9687	3.9417	1.01264	3.89586	0.977316	4.17087	0.906806	4.17087	0.899176	4.12503	0.906489	4.4917	0.385146	4.40003	0.240457	4.17087	0.349862	5.84665	1	1	0.999922	0.999367	0.49377
												4.0792	0.999984	3.98753	0.959795	3.9417	0.971986	4.2167	0.866898	4.2167	0.905368	4.17087	0.906097	4.53754	0.419633	4.44587	0.258081	4.2167	0.368842	5.92009	1	1	0.999935	0.99946	0.516404
												4.12503	0.959183	4.03336	1.03314	3.98753	1.00189	4.26253	0.900711	4.26253	0.926772	4.2167	0.887374	4.58337	0.39356	4.4917	0.264177	4.26253	0.35701	5.99353	1	1	0.999946	0.999539	0.538711
												4.17087	0.99469	4.0792	0.967578	4.03336	0.98937	4.30837	0.873809	4.30837	0.939061	4.26253	0.944008	4.6292	0.43402	4.53754	0.276535	4.30837	0.363353	6.06696	1	1	0.999955	0.999606	0.560609
												4.2167	0.991299	4.12503	0.999286	4.0792	0.981329	4.3542	0.907058	4.3542	0.894556	4.30837	0.934697	4.67504	0.448776	4.58337	0.257844	4.3542	0.341039	6.1404	1	1	0.999963	0.999664	0.582027
												4.26253	0.969963			4.12503	0.98033	4.40003	0.929719	4.40003	0.919404	4.3542	0.945415	4.72087	0.409833	4.6292	0.2466	4.40003	0.359044	6.21384	1	1	0.999969	0.999713	0.602899
												4.30837	1.02078			4.17087	1.00206	4.44587	0.89681	4.44587	0.926819	4.40003	0.915394	4.7667	0.43071	4.67504	0.216452	4.44587	0.37009	6.28727	1	1	0.999974	0.999755	0.623173
												4.3542	0.975353			4.2167	0.97615	4.4917	0.920287	4.4917	0.971261	4.44587	0.952435	4.81254	0.446871	4.72087	0.294491	4.4917	0.344425	6.36071	1	1	0.999978	0.999791	0.642805
												4.40003	1.01323			4.26253	0.983661	4.53754	0.906272	4.53754	0.976072	4.4917	0.922094	4.85837	0.414548	4.7667	0.306233	4.53754	0.367183	6.43415	1	1	0.999982	0.999821	0.661759
												4.44587	0.995826			4.30837	1.03552	4.58337	0.888906	4.58337	0.967149	4.53754	0.944023	4.90421	0.46821	4.81254	0.293305	4.58337	0.37787	6.50759	1	1	0.999985	0.999847	0.680011
												4.4917	0.985046			4.3542	1.03101	4.6292	0.910707	4.6292	0.949683	4.58337	0.959092	4.95004	0.457818	4.85837	0.304477	4.6292	0.38052	6.58102	1	1	0.999988	0.99987	0.697543
												4.53754	0.988212			4.40003	1.06495	4.67504	0.916476	4.67504	0.924263	4.6292	0.942732	4.99587	0.481321	4.90421	0.317974	4.67504	0.393669	6.65446	1	1	0.99999	0.999889	0.714344
												4.58337	0.955392			4.44587	0.976287	4.72087	0.931914	4.72087	1.00308	4.67504	0.980658	5.04171	0.434741	4.95004	0.320038	4.72087	0.413367	6.7279	1	1	0.999991	0.999905	0.730411
												4.6292	0.980823			4.4917	1.0664	4.7667	0.923223	4.7667	0.983805	4.72087	0.971086	5.08754	0.454748	4.99587	0.317784	4.7667	0.391942	6.80134	1	1	0.999993	0.999919	0.745747
												4.67504	0.96075			4.53754	0.991672	4.81254	0.962227	4.81254	0.952906	4.7667	0.975799	5.13337	0.496595	5.04171	0.388779	4.81254	0.395909	6.87477	1	1	0.999994	0.999931	0.760358
												4.72087	0.962414			4.58337	1.02771	4.85837	0.916179	4.85837	0.942379	4.81254	0.964211	5.17921	0.453473	5.08754	0.301204	4.85837	0.406408	6.94821	1	1	0.999995	0.999941	0.774257
												4.7667	0.974106			4.6292	0.990824	4.90421	0.907993	4.90421	0.974103	4.85837	1.01976	5.22504	0.48121	5.13337	0.357729	4.90421	0.399534	7.02165	1	1	0.999996	0.99995	0.787459
												4.81254	0.988612			4.67504	1.02438	4.95004	0.912442	4.95004	0.964481	4.90421	1.00357	5.27087	0.473332	5.17921	0.348194	4.95004	0.375579	7.09508	1	1	0.999997	0.999957	0.799983
												4.85837	0.979192			4.72087	0.991672	4.99587	0.932641	4.99587	0.95586	4.95004	0.950897	5.31671	0.500385	5.22504	0.314559	4.99587	0.385548	7.16852	1	1	0.999997	0.999963	0.811847
												4.90421	1.02066			4.7667	0.983949	5.04171	0.974907	5.04171	0.969626	4.99587	0.969012	5.36254	0.488884	5.27087	0.368214	5.04171	0.482481	7.24196	1	1	0.999998	0.999969	0.823076
												4.95004	1.00206					5.08754	0.965846	5.08754	0.994205	5.04171	0.989925	5.40838	0.526495	5.31671	0.37068	5.08754	0.449104	7.3154	1	1	0.999998	0.999973	0.833692
												4.99587	0.984774					5.13337	0.93227	5.13337	0.974437	5.08754	0.973537	5.45421	0.531599	5.36254	0.38923	5.13337	0.455225	7.38883	1	1	0.999998	0.999977	0.84372
												5.04171	0.954033					5.17921	0.955806	5.17921	0.964862	5.13337	0.980948	5.50004	0.537609	5.40838	0.339085	5.17921	0.470221	7.46227	1	1	0.999999	0.99998	0.853185
												5.08754	0.938039					5.22504	0.946507	5.22504	0.947032	5.17921	0.957583	5.54588	0.521244	5.45421	0.398907	5.22504	0.470272	7.53571	1	1	0.999999	0.999983	0.862112
												5.13337	1.00451					5.27087	0.998472	5.27087	0.989949	5.22504	0.982819	5.59171	0.570394	5.50004	0.401422	5.27087	0.455926	7.60915	1	1	0.999999	0.999986	0.870525
												5.17921	0.987653					5.31671	0.951816	5.31671	0.957797	5.27087	0.990665	5.63754	0.562591	5.54588	0.378034	5.31671	0.464373	7.68258	1	1	0.999999	0.999988	0.87845
												5.22504	1.00784					5.36254	0.957096	5.36254	0.999349	5.31671	1.02874	5.68338	0.593638	5.59171	0.386573	5.36254	0.476428	7.75602	1	1	0.999999	0.99999	0.885912
																		5.40838	0.974358	5.40838	0.956336	5.36254	0.976321	5.72921	0.563626	5.63754	0.352463	5.40838	0.491748	7.82946	1	1	0.999999	0.999991	0.892933
																		5.45421	0.992792	5.45421	0.983725	5.40838	0.994943	5.77505	0.637555	5.68338	0.372981	5.45421	0.458748	7.9029	1	1	1	0.999992	0.899537
																		5.50004	0.935503	5.50004	0.992379			5.82088	0.55464	5.72921	0.404719	5.50004	0.456132	7.97633	1	1	1	0.999994	0.905746
																		5.54588	0.965327	5.54588	0.999238			5.86671	0.578937	5.77505	0.415156	5.54588	0.469417	8.04977	1	1	1	0.999994	0.911582
																		5.59171	0.971066	5.59171	0.983948			5.91255	0.623853	5.82088	0.377488	5.59171	0.540172	8.12321	1	1	1	0.999995	0.917066
																		5.63754	0.965282	5.63754	1.01115			5.95838	0.601035	5.86671	0.462833	5.63754	0.519346	8.19664	1	1	1	0.999996	0.922217
																		5.68338	0.991324	5.68338	1.00114			6.00421	0.627404	5.91255	0.523581	5.68338	0.490278	8.27008	1	1	1	0.999997	0.927055
																		5.72921	0.986059	5.72921	0.987711			6.05005	0.567121	5.95838	0.483043	5.72921	0.571498	8.34352	1	1	1	0.999997	0.931597
																		5.77505	0.97025					6.09588	0.605695	6.00421	0.514259	5.77505	0.495835	8.41696	1	1	1	0.999997	0.93586
																		5.82088	0.963517					6.14172	0.652589	6.05005	0.556552	5.82088	0.511207	8.49039	1	1	1	0.999998	0.939862
																		5.86671	0.988447					6.18755	0.592677	6.09588	0.495923	5.86671	0.540138	8.56383	1	1	1	0.999998	0.943617
																		5.91255	1.01246					6.23338	0.641697	6.14172	0.552922	5.91255	0.519671	8.63727	1	1	1	0.999998	0.94714
																		5.95838	0.990939					6.27922	0.611445	6.18755	0.528799	5.95838	0.548619	8.71071	1	1	1	0.999999	0.950446
																		6.00421	0.975841					6.32505	0.656713	6.23338	0.459038	6.00421	0.5063	8.78414	1	1	1	0.999999	0.953546
																		6.05005	0.988373					6.37088	0.65098	6.27922	0.479983	6.05005	0.569223	8.85758	1	1	1	0.999999	0.956454
																		6.09588	0.989026					6.41672	0.65233	6.32505	0.613907	6.09588	0.546619	8.93102	1	1	1	0.999999	0.959182
																		6.14172	1.0226					6.46255	0.693733	6.37088	0.551547	6.14172	0.557562	9.00445	1	1	1	0.999999	0.961739
																								6.50838	0.646172	6.41672	0.590946	6.18755	0.591948	9.07789	1	1	1	0.999999	0.964138
																								6.55422	0.693474	6.46255	0.57631	6.23338	0.51078	9.15133	1	1	1	0.999999	0.966386
																								6.60005	0.668787	6.50838	0.60143	6.27922	0.566419	9.22477	1	1	1	1	0.968495
																								6.64589	0.719695	6.55422	0.627095	6.32505	0.586391	9.2982	1	1	1	1	0.970471
																								6.69172	0.670396	6.60005	0.578398	6.37088	0.563307	9.37164	1	1	1	1	0.972324
																								6.73755	0.694879	6.64589	0.628353	6.41672	0.608893	9.44508	1	1	1	1	0.974062
																								6.78339	0.716311	6.69172	0.628471	6.46255	0.583142	9.51852	1	1	1	1	0.97569
																								6.82922	0.723726	6.73755	0.685091	6.50838	0.624453	9.59195	1	1	1	1	0.977217
																								6.87505	0.700759	6.78339	0.576168	6.55422	0.618913	9.66539	1	1	1	1	0.978647
																								6.92089	0.715941	6.82922	0.687439	6.60005	0.571891	9.73883	1	1	1	1	0.979989
																								6.96672	0.741274	6.87505	0.67418	6.64589	0.591042	9.81226	1	1	1	1	0.981246
																								7.01256	0.743401	6.92089	0.647329	6.69172	0.564196	9.8857	1	1	1	1	0.982424
																								7.05839	0.674316	6.96672	0.677714	6.73755	0.624607	9.95914	1	1	1	1	0.983528
																								7.10422	0.756715	7.01256	0.680205	6.78339	0.60826	10.0326	1	1	1	1	0.984563
																								7.15006	0.75788	7.05839	0.681438	6.82922	0.63396	10.106	1	1	1	1	0.985533
																								7.19589	0.776297	7.10422	0.669673	6.87505	0.614535	10.1795	1	1	1	1	0.986443
																								7.24172	0.737594	7.15006	0.668629	6.92089	0.616279	10.2529	1	1	1	1	0.987295
																								7.28756	0.802721	7.19589	0.645929	6.96672	0.641192	10.3263	1	1	1	1	0.988093
																								7.33339	0.729384	7.24172	0.675983	7.01256	0.613065	10.3998	1	1	1	1	0.988842
																								7.37922	0.798542	7.28756	0.651527	7.05839	0.654034	10.4732	1	1	1	1	0.989543
																								7.42506	0.747154	7.33339	0.701909	7.10422	0.629104	10.5466	1	1	1	1	0.990201
																								7.47089	0.804256	7.37922	0.742233	7.15006	0.655573	10.6201	1	1	1	1	0.990817
																								7.51673	0.773468	7.42506	0.736825	7.19589	0.665575	10.6935	1	1	1	1	0.991394
																								7.56256	0.82628	7.47089	0.729424	7.24172	0.661489	10.7669	1	1	1	1	0.991935
																								7.60839	0.84405	7.51673	0.684166	7.28756	0.682178	10.8404	1	1	1	1	0.992442
																								7.65423	0.851835	7.56256	0.736659	7.33339	0.669679	10.9138	1	1	1	1	0.992917
																								7.70006	0.802148	7.60839	0.726127	7.37922	0.633498	10.9873	1	1	1	1	0.993363
																								7.74589	0.817071	7.65423	0.708954	7.42506	0.684589	11.0607	1	1	1	1	0.99378
																								7.79173	0.841276	7.70006	0.697687	7.47089	0.692557	11.1341	1	1	1	1	0.994171
																								7.83756	0.820381	7.74589	0.764198	7.51673	0.710562	11.2076	1	1	1	1	0.994538
																								7.8834	0.80139	7.79173	0.701316	7.56256	0.670825	11.281	1	1	1	1	0.994881
																								7.92923	0.827888	7.83756	0.751816	7.60839	0.705501	11.3544	1	1	1	1	0.995203
																								7.97506	0.846232	7.8834	0.742186	7.65423	0.712854	11.4279	1	1	1	1	0.995505
																								8.0209	0.815444	7.92923	0.742162	7.70006	0.707057	11.5013	1	1	1	1	0.995787
																								8.06673	0.852353	7.97506	0.746028	7.74589	0.728602	11.5748	1	1	1	1	0.996052
																								8.11256	0.822378	8.0209	0.794607	7.79173	0.675065	11.6482	1	1	1	1	0.9963
																								8.1584	0.838761	8.06673	0.797881	7.83756	0.730517	11.7216	1	1	1	1	0.996533
																								8.20423	0.868107	8.11256	0.786186	7.8834	0.669953	11.7951	1	1	1	1	0.996751
																								8.25007	0.860526	8.1584	0.793397	7.92923	0.697123	11.8685	1	1	1	1	0.996955
																								8.2959	0.839427	8.20423	0.811496	7.97506	0.664909	11.9419	1	1	1	1	0.997147
																								8.34173	0.827149	8.25007	0.832132	8.0209	0.682469	12.0154	1	1	1	1	0.997326
																								8.38757	0.865999	8.2959	0.830946	8.06673	0.726464	12.0888	1	1	1	1	0.997494
																								8.4334	0.891055	8.34173	0.845961	8.11256	0.736587	12.1623	1	1	1	1	0.997652
																								8.47923	0.82186	8.38757	0.861071	8.1584	0.730961	12.2357	1	1	1	1	0.9978
																								8.52507	0.921326	8.4334	0.828337	8.20423	0.737715	12.3091	1	1	1	1	0.997938
																								8.5709	0.841701	8.47923	0.821269	8.25007	0.707792	12.3826	1	1	1	1	0.998068
																								8.61673	0.862116	8.52507	0.864724	8.2959	0.725438	12.456	1	1	1	1	0.998189
																								8.66257	0.888707	8.5709	0.823641	8.34173	0.752147	12.5294	1	1	1	1	0.998303
																								8.7084	0.836542	8.61673	0.871603	8.38757	0.741016	12.6029	1	1	1	1	0.99841
																								8.75424	0.865814	8.66257	0.782889	8.4334	0.745171	12.6763	1	1	1	1	0.99851
																								8.80007	0.882013	8.7084	0.921557	8.47923	0.719334	12.7498	1	1	1	1	0.998603
																								8.8459	0.872157	8.75424	0.883415	8.52507	0.760081	12.8232	1	1	1	1	0.998691
																								8.89174	0.827648	8.80007	0.891955	8.5709	0.754592	12.8966	1	1	1	1	0.998774
																								8.93757	0.915464	8.8459	0.797667	8.61673	0.75637	12.9701	1	1	1	1	0.998851
																								8.9834	0.861524	8.89174	0.849543	8.66257	0.758012	13.0435	1	1	1	1	0.998923
																								9.02924	0.937136	8.93757	0.886997	8.7084	0.78354	13.1169	1	1	1	1	0.998991
																								9.07507	0.893034	8.9834	0.914204	8.75424	0.767536	13.1904	1	1	1	1	0.999054
																								9.12091	0.898267	9.02924	0.874544	8.80007	0.770101	13.2638	1	1	1	1	0.999114
																								9.16674	0.943885	9.07507	0.961478	8.8459	0.749804	13.3373	1	1	1	1	0.999169
																								9.21257	0.934621	9.12091	0.939751	8.89174	0.75779	13.4107	1	1	1	1	0.999222
																								9.25841	0.879646	9.16674	0.980241	8.93757	0.762697	13.4841	1	1	1	1	0.999271
																								9.30424	0.932328	9.21257	0.910219	8.9834	0.781112	13.5576	1	1	1	1	0.999316
																								9.35007	0.879646	9.25841	0.949215	9.02924	0.802298	13.631	1	1	1	1	0.999359
																								9.39591	0.965151	9.30424	1.00066	9.07507	0.809052	13.7044	1	1	1	1	0.9994
																								9.44174	0.971179	9.35007	0.940296	9.12091	0.78908	13.7779	1	1	1	1	0.999437
																								9.48758	0.914632	9.39591	0.944874	9.16674	0.816114	13.8513	1	1	1	1	0.999473
																								9.53341	0.895882	9.44174	0.962949	9.21257	0.809223	13.9248	1	1	1	1	0.999506
																								9.57924	0.928852	9.48758	0.989421	9.25841	0.823825	13.9982	1	1	1	1	0.999537
																								9.62508	0.975617	9.53341	0.958869	9.30424	0.807291	14.0716	1	1	1	1	0.999566
																								9.67091	0.963301	9.57924	0.975687	9.35007	0.838137	14.1451	1	1	1	1	0.999593
																								9.71674	0.916481	9.62508	0.966483	9.39591	0.797083	14.2185	1	1	1	1	0.999619
																								9.76258	0.901207	9.67091	0.96729	9.44174	0.819944	14.2919	1	1	1	1	0.999643
																								9.80841	0.975839	9.71674	0.955786	9.48758	0.866692	14.3654	1	1	1	1	0.999665
																								9.85424	0.966408	9.76258	1.01755	9.53341	0.786789	14.4388	1	1	1	1	0.999686
																								9.90008	0.975635	9.80841	1.02066	9.57924	0.858861	14.5123	1	1	1	1	0.999706
																								9.94591	0.950025	9.85424	1.01376	9.62508	0.854979	14.5857	1	1	1	1	0.999725
																								9.99175	0.976061	9.90008	0.994592	9.67091	0.828989	14.6591	1	1	1	1	0.999742
																								10.0376	0.96123	9.94591	0.96952	9.71674	0.823877	14.7326	1	1	1	1	0.999758
																								10.0834	0.996142	9.99175	1.05486	9.76258	0.828237	14.806	1	1	1	1	0.999773
																								10.1292	0.949803	10.0376	1.05183	9.80841	0.804247
																								10.1751	0.978132	10.0834	0.960032	9.85424	0.814404
																								10.2209	0.976782	10.1292	0.991081	9.90008	0.859613
																								10.2667	0.961822	10.1751	1.04559	9.94591	0.84142
																								10.3126	0.941685	10.2209	0.964372	9.99175	0.86871
																								10.3584	0.959566	10.2667	1.01817	10.0376	0.885792
																								10.4042	0.97301	10.3126	0.936952	10.0834	0.835743
																								10.4501	1.00641	10.3584	1.10159	10.1292	0.892597
																								10.4959	0.916795	10.4042	0.992504	10.1751	0.852261
																								10.5418	0.987803	10.4501	1.05169	10.2209	0.791337
																								10.5876	0.964319	10.4959	0.997106	10.2667	0.843318
																								10.6334	0.955942	10.5418	1.03039	10.3126	0.859134
																								10.6793	0.998583	10.5876	0.976422	10.3584	0.858502
																								10.7251	0.951948	10.6334	1.02023	10.4042	0.839608
																								10.7709	0.997622	10.6793	0.987571	10.4501	0.847063
																								10.8168	0.968738	10.7251	0.99471	10.4959	0.854142
																								10.8626	0.989966	10.7709	0.987286	10.5418	0.896512
																								10.9084	0.993036	10.8168	0.991793	10.5876	0.906994
																								10.9543	0.984992	10.8626	0.946203	10.6334	0.908653
																								11.0001	0.928519	10.9084	0.961977	10.6793	0.867838
																								11.0459	0.918755	10.9543	1.02806	10.7251	0.855783
																								11.0918	0.97325	11.0001	1.02657	10.7709	0.879362
																								11.1376	0.990318			10.8168	0.919596
																								11.1834	0.99703			10.8626	0.881978
																								11.2293	0.983457			10.9084	0.862263
																								11.2751	1.02305			10.9543	0.887792
																								11.3209	0.921215			11.0001	0.925119
																								11.3668	0.971197			11.0459	0.830921
																								11.4126	0.957218			11.0918	0.894786
																								11.4584	1.00846			11.1376	0.917972
																								11.5043	0.991797			11.1834	0.909764
																								11.5501	0.985584			11.2293	0.897607
																								11.5959	0.980831			11.2751	0.904258
																								11.6418	0.97815			11.3209	0.915783
																								11.6876	0.951837			11.3668	0.874113
																								11.7334	0.977337			11.4126	0.924897
																								11.7793	0.986231			11.4584	0.866607
																								11.8251	1.01656			11.5043	0.868573
																								11.8709	1.00369			11.5501	0.872369
																								11.9168	1.01761			11.5959	0.92293
																								11.9626	0.998472			11.6418	0.947826
																								12.0084	0.994312			11.6876	0.935156
																								12.0543	0.969737			11.7334	0.944423
																								12.1001	0.966223			11.7793	0.910174
																								12.1459	0.980295			11.8251	0.922776
																								12.1918	0.97693			11.8709	0.943192
																								12.2376	0.998139			11.9168	0.935429
																								12.2834	0.965373			11.9626	0.957658
																								12.3293	0.96565			12.0084	0.947553
																								12.3751	0.952502			12.0543	0.94203
																								12.4209	1.02774			12.1001	0.902412
																								12.4668	1.00228			12.1459	0.924845
																								12.5126	0.983605			12.1918	0.933532
																								12.5584	1.0562			12.2376	0.985957
																								12.6043	1.0087			12.2834	0.910311
																								12.6501	0.968923			12.3293	0.898034
																								12.6959	0.990262			12.3751	0.944834
																								12.7418	1.00028			12.4209	0.937071
																								12.7876	1.00507			12.4668	0.946048
																								12.8334	0.961415			12.5126	0.967045
																								12.8793	1.01837			12.5584	0.932044
																								12.9251	0.972011			12.6043	0.918553
																								12.9709	1.00513			12.6501	0.936045
																												12.6959	0.925221
																												12.7418	0.964874
																												12.7876	0.966669
																												12.8334	0.970055
																												12.8793	0.918997
																												12.9251	0.978895
																												12.9709	0.932078
																												13.0168	0.916142
																												13.0626	0.959128
																												13.1084	0.936524
																												13.1543	0.989667
																												13.2001	0.95022
																												13.2459	0.951246
																												13.2918	0.951058
																												13.3376	1.02207
																												13.3834	0.939482
																												13.4293	0.975834
																												13.4751	0.953503
																												13.5209	0.897573
																												13.5668	0.942013
																												13.6126	0.966242
																												13.6584	0.976262
																												13.7043	0.963506
																												13.7501	0.978313
																												13.7959	0.997464
																												13.8418	1.00119
																												13.8876	0.996199
																												13.9334	0.99796
																												13.9793	0.942765
																												14.0251	0.974346
																												14.0709	0.968482
																												14.1168	0.959659
																												14.1626	0.980912
																												14.2084	0.94309
																												14.2543	1.03147
																												14.3001	1.02279
																												14.3459	0.990813
																												14.3918	0.992762
																												14.4376	0.997139
																												14.4834	0.946202
																												14.5293	0.987119
																												14.5751	1.0014
																												14.6209	0.984161
																												14.6668	1.01446
																												14.7126	1.02412
																												14.7585	0.98977
																												14.8043	1.01779

## Sheet: Fig. 6e
DAm12	DAm14	DAm15	condition
1.0224	1.0224	1.0224	Untreated
1.0758	1.0758	1.0758	Untreated
0.9018	0.9018	0.9018	Untreated
1.095	1.29725	0.934842	Binder
1.112	1.30228	0.974748	Binder
1.159	1.31004	0.969998	Binder
0.6254	0.6254	0.6254	A-Beta
0.6264	0.6264	0.6264	A-Beta
0.6259	0.6259	0.6259	A-Beta
0.8737	1.14365	1.06431	A-Beta + Binder
0.8502	1.16122	1.10764	A-Beta + Binder
0.845	1.2058	1.08598	A-Beta + Binder
