# Supplementary material for: Design of amyloidogenic peptide traps
Source: Nat Chem Biol. 2024 Mar 19;20(8):981–90. doi: 10.1038/s41589-024-01578-5 (PMC11288891; doi:10.1038/s41589-024-01578-5)
Supplement: Supplementary file 11 — Statistical source data. [file 41589_2024_1578_MOESM11_ESM.xlsx]

## Sheet: Extended Data Fig. 1a
SEC binding assays
GFP104			C104			complex
	uv 230	vol 230		uv 230	vol 230			uv 230	vol 230
0	0.000627269	7.00487	0	0.00034	7.00649		0	0.000117	7.00009
1	0.000562877	7.0115	1	0.000337	7.01313		1	0.00013	7.00673
2	0.000538614	7.01814	2	0.000319	7.01976		2	0.000144	7.01336
3	0.00052911	7.02478	3	0.000286	7.0264		3	0.000152	7.02
4	0.000521534	7.03142	4	0.000302	7.03304		4	0.000162	7.02663
5	0.00052808	7.03805	5	0.000349	7.03968		5	0.000177	7.03327
6	0.000535315	7.04492	6	0.000379	7.04654		6	0.000185	7.03991
7	0.000532836	7.05155	7	0.000379	7.05318		7	0.000178	7.04655
8	0.000547473	7.05819	8	0.000358	7.05981		8	0.000167	7.05341
9	0.000596076	7.06483	9	0.00034	7.06645		9	0.000167	7.06004
10	0.000626318	7.07145	10	0.000334	7.07309		10	0.000178	7.06668
11	0.000609508	7.07809	11	0.000329	7.07974		11	0.000186	7.07332
12	0.000582514	7.08473	12	0.000337	7.08638		12	0.000193	7.07995
13	0.000573062	7.09137	13	0.000385	7.09301		13	0.000205	7.08658
14	0.000569632	7.09823	14	0.000383	7.09988		14	0.000215	7.09322
15	0.000560599	7.10487	15	0.000361	7.10652		15	0.000212	7.09986
16	0.000549794	7.11151	16	0.000353	7.11316		16	0.000214	7.10673
17	0.000537122	7.11815	17	0.000346	7.1198		17	0.000192	7.11337
18	0.000506828	7.12479	18	0.000351	7.12643		18	0.000173	7.12
19	0.000459289	7.13142	19	0.000365	7.13307		19	0.000168	7.12664
20	0.000423925	7.13806	20	0.000376	7.13971		20	0.000156	7.13328
21	0.000421472	7.1447	21	0.00039	7.14634		21	0.000136	7.13992
22	0.000428446	7.15156	22	0.000413	7.15321		22	0.000109	7.14655
23	0.000420242	7.15819	23	0.000391	7.15984		23	8.07e-05	7.15319
24	0.000415503	7.16483	24	0.000412	7.16648		24	5.84e-05	7.16005
25	0.000416341	7.17147	25	0.000461	7.17312		25	4.92e-05	7.16669
26	0.000406941	7.17812	26	0.000491	7.17975		26	3.22e-05	7.17333
27	0.000397934	7.18476	27	0.000507	7.18638		27	3.84e-05	7.17996
28	0.000395604	7.1914	28	0.00051	7.19302		28	5.56e-05	7.18662
29	0.000409245	7.19804	29	0.000486	7.19965		29	6.37e-05	7.19325
30	0.000434189	7.2049	30	0.000467	7.20652		30	5.98e-05	7.19989
31	0.000454541	7.21154	31	0.000456	7.21316		31	5.23e-05	7.20653
32	0.000462152	7.21818	32	0.000432	7.2198		32	5.05e-05	7.2134
33	0.00047794	7.22482	33	0.000405	7.22644		33	5.58e-05	7.22004
34	0.000490272	7.23146	34	0.000336	7.23307		34	5.86e-05	7.22667
35	0.000502674	7.23809	35	0.000284	7.23971		35	5.47e-05	7.23331
36	0.000525331	7.24473	36	0.000271	7.24636		36	5.83e-05	7.23995
37	0.00055524	7.25137	37	0.000264	7.25298		37	7.85e-05	7.24659
38	0.000581013	7.25823	38	0.000259	7.25985		38	9.34e-05	7.25322
39	0.000597647	7.26486	39	0.000283	7.26649		39	9.47e-05	7.25986
40	0.000607614	7.2715	40	0.000311	7.27312		40	9.47e-05	7.26672
41	0.000610852	7.27814	41	0.000331	7.27976		41	0.000102	7.27335
42	0.000599471	7.28478	42	0.000361	7.2864		42	0.000105	7.27999
43	0.000579459	7.29142	43	0.000395	7.29304		43	0.000102	7.28663
44	0.000550292	7.29805	44	0.000409	7.29967		44	0.000114	7.29326
45	0.000520871	7.30469	45	0.000385	7.30631		45	0.000134	7.2999
46	0.000498589	7.31156	46	0.000353	7.31318		46	0.00014	7.30654
47	0.000473236	7.3182	47	0.000338	7.31982		47	0.000124	7.31317
48	0.0004265	7.32484	48	0.000328	7.32646		48	0.000106	7.32004
49	0.000365468	7.33148	49	0.000289	7.33309		49	9.88e-05	7.32668
50	0.000320808	7.33812	50	0.000244	7.33974		50	0.000101	7.33331
51	0.000315275	7.34475	51	0.000263	7.34637		51	0.000103	7.33996
52	0.00032272	7.35139	52	0.000272	7.35301		52	0.000107	7.34659
53	0.00032862	7.35801	53	0.000255	7.35964		53	0.000122	7.35323
54	0.000343596	7.36489	54	0.000249	7.36651		54	0.00012	7.35986
55	0.000332259	7.37152	55	0.000245	7.37314		55	0.000115	7.3665
56	0.00030447	7.37816	56	0.000226	7.37978		56	0.000124	7.37337
57	0.000281831	7.3848	57	0.000198	7.38642		57	0.000137	7.38
58	0.000285855	7.39142	58	0.000179	7.39306		58	0.000148	7.38664
59	0.000314324	7.39806	59	0.000188	7.39971		59	0.000161	7.39328
60	0.000345019	7.4047	60	0.000245	7.40634		60	0.00018	7.39992
61	0.000341152	7.41134	61	0.000237	7.41298		61	0.000198	7.40657
62	0.000277432	7.4182	62	0.000196	7.41985		62	0.000215	7.4132
63	0.000214044	7.42484	63	0.000172	7.42649		63	0.00022	7.41984
64	0.000179212	7.43148	64	0.000155	7.43313		64	0.000217	7.42671
65	0.000179875	7.43811	65	0.000146	7.43977		65	0.000217	7.43335
66	0.000190776	7.44475	66	0.000161	7.4464		66	0.000217	7.43998
67	0.000194808	7.4514	67	0.000209	7.45304		67	0.000215	7.44662
68	0.000191282	7.45803	68	0.000255	7.45968		68	0.000216	7.45326
69	0.00018183	7.46467	69	0.000277	7.46631		69	0.000219	7.4599
70	0.000159217	7.47153	70	0.000253	7.47318		70	0.000216	7.46654
71	0.000129683	7.47816	71	0.000231	7.47981		71	0.000213	7.47317
72	0.000159863	7.4848	72	0.000243	7.48644		72	0.000211	7.48004
73	0.00017717	7.49144	73	0.000258	7.49309		73	0.00022	7.48667
74	0.000160509	7.49809	74	0.000271	7.49972		74	0.000239	7.49331
75	0.000144904	7.50474	75	0.000287	7.50635		75	0.000237	7.49995
76	0.0001402	7.51138	76	0.000287	7.51299		76	0.000224	7.50659
77	0.00013451	7.51802	77	0.000255	7.51962		77	0.000216	7.51322
78	0.000129474	7.52489	78	0.000222	7.52649		78	0.000211	7.51986
79	0.00012525	7.53153	79	0.000214	7.53314		79	0.000201	7.5265
80	0.000132659	7.53817	80	0.00019	7.53977		80	0.000184	7.53337
81	0.000148011	7.5448	81	0.000159	7.54641		81	0.000167	7.54001
82	0.000151642	7.55143	82	0.000147	7.55305		82	0.000167	7.54664
83	0.000164279	7.55807	83	0.000153	7.55968		83	0.00016	7.55328
84	0.000169367	7.56471	84	0.000163	7.56632		84	0.000141	7.55992
85	0.000151371	7.57135	85	0.000173	7.57296		85	0.000138	7.56655
86	0.000126018	7.57821	86	0.000179	7.57982		86	0.000148	7.57319
87	0.000112045	7.58484	87	0.000171	7.58646		87	0.000158	7.57983
88	9.83337e-05	7.59148	88	0.000166	7.59309		88	0.000161	7.58669
89	9.54187e-05	7.59812	89	0.000169	7.59973		89	0.000161	7.59332
90	8.08523e-05	7.60475	90	0.000188	7.60637		90	0.000167	7.59996
91	5.0428e-05	7.61138	91	0.000207	7.61302		91	0.000178	7.60661
92	2.86003e-05	7.61802	92	0.000204	7.61965		92	0.000171	7.61323
93	1.53867e-05	7.62466	93	0.000179	7.62629		93	0.000163	7.61987
94	1.73592e-05	7.63153	94	0.000133	7.63316		94	0.000165	7.6265
95	3.35488e-05	7.63817	95	8.93e-05	7.6398		95	0.000165	7.63314
96	4.71988e-05	7.6448	96	7e-05	7.64644		96	0.000157	7.64001
97	4.95901e-05	7.65144	97	6.59e-05	7.65308		97	0.000152	7.64665
98	5.2252e-05	7.65808	98	7.96e-05	7.65971		98	0.00016	7.65328
99	4.41354e-05	7.66471	99	8.84e-05	7.66636		99	0.000171	7.65992
100	5.27321e-05	7.67136	100	6.69e-05	7.67299		100	0.000174	7.66656
101	7.689e-05	7.67799	101	2.82e-05	7.67963		101	0.000171	7.6732
102	0.000100158	7.68485	102	0	7.68649		102	0.000169	7.67983
103	0.000117753	7.69149	103	3.98e-06	7.69313		103	0.000166	7.68647
104	0.000129674	7.69813	104	2.85e-05	7.69976		104	0.00016	7.69334
105	0.000135557	7.70477	105	5.23e-05	7.7064		105	0.00016	7.69997
106	0.000135461	7.7114	106	5.37e-05	7.71304		106	0.000166	7.70661
107	0.000118939	7.71804	107	5.58e-05	7.71967		107	0.000165	7.71325
108	0.000101458	7.72468	108	4.02e-05	7.72631		108	0.000149	7.7199
109	9.32368e-05	7.73131	109	1.84e-05	7.73295		109	0.000117	7.72654
110	7.00389e-05	7.73819	110	2.19e-05	7.73982		110	9.38e-05	7.73317
111	4.77486e-05	7.74482	111	4.74e-05	7.74646		111	7.74e-05	7.73981
112	3.06687e-05	7.75146	112	6.82e-05	7.7531		112	6.09e-05	7.74668
113	1.57358e-05	7.7581	113	6.75e-05	7.75974		113	5.79e-05	7.75333
114	4.32888e-06	7.76474	114	8.31e-05	7.76637		114	6.36e-05	7.75996
115	0	7.77137	115	9.81e-05	7.77301		115	6.16e-05	7.76659
116	9.8098e-06	7.77801	116	8.08e-05	7.77964		116	4.65e-05	7.77323
117	3.58267e-05	7.78465	117	4.78e-05	7.78628		117	3.32e-05	7.77987
118	8.4099e-05	7.79151	118	4.06e-05	7.79315		118	3.09e-05	7.78651
119	0.000125058	7.79814	119	7.21e-05	7.79978		119	4.58e-05	7.79314
120	0.000160963	7.80478	120	0.000101	7.80642		120	6.46e-05	7.8
121	0.000193726	7.81142	121	0.000105	7.81306		121	7.72e-05	7.80664
122	0.000217753	7.81805	122	0.000105	7.8197		122	9.87e-05	7.81328
123	0.000232773	7.82468	123	0.000115	7.82633		123	0.000112	7.81992
124	0.000247514	7.83132	124	0.000109	7.83297		124	0.00011	7.82655
125	0.000258886	7.83796	125	0.000116	7.8396		125	0.000106	7.83318
126	0.000260169	7.84483	126	0.000161	7.84648		126	0.000119	7.83982
127	0.000267195	7.85147	127	0.000217	7.85311		127	0.000148	7.84645
128	0.000252472	7.85811	128	0.000241	7.85975		128	0.000169	7.85332
129	0.000241065	7.86475	129	0.000231	7.86639		129	0.000194	7.85997
130	0.00023499	7.87139	130	0.000235	7.87302		130	0.000216	7.8666
131	0.000217587	7.87802	131	0.000264	7.87966		131	0.000225	7.87324
132	0.000193883	7.88465	132	0.000289	7.8863		132	0.000217	7.87988
133	0.000184545	7.89129	133	0.000304	7.89294		133	0.000203	7.88652
134	0.000190724	7.89816	134	0.000315	7.8998		134	0.000197	7.89314
135	0.000198046	7.90479	135	0.000311	7.90644		135	0.000202	7.89979
136	0.000198116	7.91143	136	0.000299	7.91307		136	0.0002	7.90665
137	0.000192295	7.91806	137	0.000289	7.91971		137	0.000181	7.91328
138	0.000194459	7.92471	138	0.000287	7.92635		138	0.000163	7.91992
139	0.000194355	7.93136	139	0.000295	7.93297		139	0.000141	7.92656
140	0.000194974	7.93799	140	0.000295	7.93961		140	0.000114	7.93321
141	0.000211487	7.94462	141	0.000288	7.94625		141	9.76e-05	7.93985
142	0.000233489	7.9515	142	0.000283	7.95312		142	8.98e-05	7.94649
143	0.000223321	7.95814	143	0.000308	7.95976		143	8.65e-05	7.95312
144	0.000197907	7.96478	144	0.000348	7.9664		144	8.43e-05	7.96
145	0.000189563	7.97141	145	0.000387	7.97303		145	8.79e-05	7.96664
146	0.000189197	7.97805	146	0.000422	7.97967		146	9.4e-05	7.97328
147	0.000190541	7.98469	147	0.000456	7.98631		147	0.0001	7.9799
148	0.000184012	7.99132	148	0.000478	7.99295		148	0.000105	7.98655
149	0.000178767	7.99796	149	0.000488	7.99958		149	9.8e-05	7.99319
150	0.000175398	8.00483	150	0.000478	8.00644		150	8.46e-05	7.99982
151	0.000169132	8.01146	151	0.000474	8.01308		151	7.87e-05	8.00646
152	0.000171645	8.0181	152	0.00047	8.01972		152	8.38e-05	8.01332
153	0.000200961	8.02473	153	0.000437	8.02636		153	8.53e-05	8.01995
154	0.000239371	8.03138	154	0.00041	8.03299		154	9.05e-05	8.02659
155	0.000260693	8.03801	155	0.000409	8.03964		155	9.02e-05	8.03323
156	0.000272955	8.04465	156	0.000409	8.04628		156	7.76e-05	8.03986
157	0.000280714	8.05128	157	0.000397	8.05292		157	6.18e-05	8.04649
158	0.000289197	8.05815	158	0.000394	8.05978		158	5.41e-05	8.05313
159	0.000294739	8.0648	159	0.000372	8.06643		159	6.53e-05	8.05976
160	0.000301617	8.07143	160	0.000371	8.07307		160	8.03e-05	8.06664
161	0.000327302	8.07807	161	0.000383	8.07971		161	7.43e-05	8.07328
162	0.000352664	8.08471	162	0.000398	8.08634		162	5.71e-05	8.07991
163	0.000358145	8.09134	163	0.000416	8.09298		163	6.72e-05	8.08655
164	0.000354549	8.09798	164	0.000417	8.09961		164	7.35e-05	8.09319
165	0.000368863	8.10462	165	0.000408	8.10625		165	7.3e-05	8.09982
166	0.000396581	8.11148	166	0.000429	8.11311		166	8.3e-05	8.10646
167	0.000420015	8.11811	167	0.000462	8.11975		167	9.75e-05	8.1131
168	0.000435969	8.12475	168	0.000455	8.12639		168	0.000105	8.11996
169	0.000445342	8.13139	169	0.000469	8.13302		169	0.000102	8.1266
170	0.000438552	8.13802	170	0.000505	8.13967		170	0.000102	8.13323
171	0.000414447	8.14461	171	0.000535	8.14618		171	0.000116	8.13987
172	0.000404934	8.15084	172	0.000565	8.1524		172	0.000112	8.1464
173	0.000415293	8.15723	173	0.000596	8.15888		173	8.05e-05	8.15263
174	0.00044316	8.16411	174	0.000623	8.16568		174	6e-05	8.15909
175	0.000456453	8.17075	175	0.000623	8.17239		175	4.8e-05	8.16572
176	0.000439338	8.17738	176	0.000598	8.17903		176	3.46e-05	8.1726
177	0.000412553	8.18402	177	0.000563	8.18567		177	1.8e-05	8.17924
178	0.000405318	8.19066	178	0.000566	8.19231		178	5.36e-06	8.18588
179	0.000425208	8.1973	179	0.000566	8.19894		179	2.42e-06	8.19252
180	0.000458477	8.20393	180	0.000541	8.20558		180	3.55e-06	8.19915
181	0.000513566	8.21057	181	0.000515	8.21221		181	0	8.20578
182	0.000554062	8.21743	182	0.00049	8.21899		182	1.27e-05	8.21242
183	0.000628176	8.22406	183	0.000468	8.22572		183	2.03e-05	8.21906
184	0.000691181	8.2307	184	0.000482	8.23235		184	1.66e-05	8.22592
185	0.000755023	8.23734	185	0.000509	8.23899		185	2.52e-05	8.23256
186	0.000847213	8.24398	186	0.00055	8.24563		186	4.29e-05	8.2392
187	0.000958201	8.25064	187	0.000606	8.25225		187	5.6e-05	8.24583
188	0.00106065	8.25728	188	0.000662	8.25889		188	5.63e-05	8.25248
189	0.00114132	8.26392	189	0.000721	8.26552		189	4.96e-05	8.25911
190	0.00122115	8.27079	190	0.000767	8.27229		190	4.66e-05	8.26575
191	0.00127754	8.27742	191	0.000793	8.27904		191	4.98e-05	8.27238
192	0.00132301	8.28407	192	0.000815	8.28568		192	6.58e-05	8.27925
193	0.00133215	8.2907	193	0.00083	8.29232		193	8.74e-05	8.28589
194	0.00134201	8.29734	194	0.000811	8.29895		194	0.000112	8.29253
195	0.00135377	8.30398	195	0.000763	8.30559		195	0.000123	8.29917
196	0.0013758	8.31061	196	0.000701	8.31223		196	0.000125	8.3058
197	0.00142689	8.31725	197	0.000683	8.31886		197	0.000131	8.31244
198	0.00147312	8.32412	198	0.000676	8.32561		198	0.000146	8.31908
199	0.00152366	8.33075	199	0.000663	8.33236		199	0.000174	8.32572
200	0.00157193	8.33739	200	0.000661	8.33899		200	0.000199	8.33258
201	0.0016558	8.34402	201	0.000678	8.34564		201	0.000221	8.33921
202	0.00176442	8.35067	202	0.0007	8.35227		202	0.00023	8.34585
203	0.00190443	8.35729	203	0.000724	8.35892		203	0.000229	8.35249
204	0.00206375	8.36393	204	0.000758	8.36556		204	0.000222	8.35913
205	0.00222816	8.37056	205	0.000822	8.37219		205	0.000216	8.36576
206	0.00241464	8.37743	206	0.000908	8.37895		206	0.000219	8.37239
207	0.00257015	8.38407	207	0.000953	8.38571		207	0.000227	8.37903
208	0.00274288	8.39071	208	0.000992	8.39234		208	0.000245	8.3859
209	0.00291156	8.39735	209	0.00104	8.39898		209	0.00025	8.39254
210	0.00312019	8.40399	210	0.001079	8.40562		210	0.000246	8.39918
211	0.00330454	8.41062	211	0.001096	8.41226		211	0.000244	8.40581
212	0.00349452	8.41726	212	0.001111	8.41889		212	0.000242	8.41244
213	0.00367114	8.42389	213	0.001154	8.42553		213	0.000249	8.41909
214	0.00384301	8.43076	214	0.001188	8.43226		214	0.000257	8.42572
215	0.00404984	8.43739	215	0.001189	8.43903		215	0.000255	8.43236
216	0.00422836	8.44403	216	0.001165	8.44566		216	0.000254	8.43922
217	0.00448745	8.45067	217	0.001144	8.4523		217	0.00027	8.44585
218	0.00472934	8.45731	218	0.001118	8.45894		218	0.000274	8.45249
219	0.00499878	8.46394	219	0.001112	8.46556		219	0.000268	8.45914
220	0.00523348	8.47058	220	0.001156	8.4722		220	0.000271	8.46578
221	0.00549393	8.47722	221	0.001217	8.47884		221	0.000273	8.47242
222	0.00575965	8.48409	222	0.001243	8.48557		222	0.000274	8.47906
223	0.00602916	8.49073	223	0.00124	8.49235		223	0.000278	8.48569
224	0.00631087	8.49737	224	0.001263	8.49899		224	0.000287	8.49257
225	0.00655353	8.504	225	0.001323	8.50562		225	0.000299	8.4992
226	0.00687045	8.51064	226	0.001394	8.51227		226	0.0003	8.50585
227	0.00710677	8.51728	227	0.001467	8.5189		227	0.00028	8.51248
228	0.00743584	8.52391	228	0.00154	8.52554		228	0.00026	8.51912
229	0.00775468	8.53055	229	0.001596	8.53218		229	0.000251	8.52575
230	0.00811711	8.53741	230	0.001616	8.53889		230	0.000236	8.53239
231	0.00847	8.54405	231	0.001606	8.54567		231	0.000221	8.53903
232	0.0088211	8.55069	232	0.001626	8.55231		232	0.000213	8.54589
233	0.00918475	8.55733	233	0.00166	8.55894		233	0.000208	8.55253
234	0.00954033	8.56396	234	0.001672	8.56558		234	0.000202	8.55916
235	0.00998047	8.57059	235	0.001706	8.57222		235	0.000202	8.56581
236	0.0103393	8.57723	236	0.001755	8.57886		236	0.000208	8.57244
237	0.0107971	8.58386	237	0.001791	8.5855		237	0.000217	8.57907
238	0.0111642	8.59073	238	0.00181	8.59221		238	0.000227	8.5857
239	0.0115429	8.59737	239	0.001824	8.599		239	0.000245	8.59234
240	0.0118851	8.60401	240	0.001872	8.60564		240	0.000272	8.59921
241	0.0122541	8.61065	241	0.001953	8.61228		241	0.000291	8.60585
242	0.0126637	8.61728	242	0.002051	8.61892		242	0.000291	8.61249
243	0.0130596	8.62392	243	0.002138	8.62556		243	0.000285	8.61913
244	0.013501	8.63056	244	0.002235	8.63219		244	0.000275	8.62576
245	0.0138507	8.6372	245	0.002315	8.63883		245	0.000263	8.6324
246	0.0142915	8.64406	246	0.002358	8.64553		246	0.000275	8.63904
247	0.0146436	8.6507	247	0.00238	8.65233		247	0.000288	8.64567
248	0.0150568	8.65733	248	0.002418	8.65896		248	0.000304	8.65254
249	0.0154704	8.66397	249	0.002484	8.6656		249	0.000314	8.65917
250	0.0159004	8.67061	250	0.002516	8.67224		250	0.000315	8.66581
251	0.0163194	8.67726	251	0.002545	8.67888		251	0.000316	8.67244
252	0.0166879	8.68389	252	0.002557	8.68552		252	0.000329	8.67909
253	0.0171197	8.69053	253	0.002589	8.69215		253	0.000343	8.68572
254	0.0174802	8.6974	254	0.002624	8.69885		254	0.000361	8.69236
255	0.0178656	8.70404	255	0.002644	8.70566		255	0.000389	8.699
256	0.018166	8.71068	256	0.002663	8.71231		256	0.000395	8.70587
257	0.0185114	8.71732	257	0.002711	8.71894		257	0.000394	8.71251
258	0.0188369	8.72396	258	0.002805	8.72557		258	0.000387	8.71914
259	0.0191607	8.73059	259	0.00287	8.73222		259	0.000381	8.72578
260	0.0195056	8.73723	260	0.002947	8.73885		260	0.000383	8.73242
261	0.0198102	8.74387	261	0.00303	8.74549		261	0.000397	8.73906
262	0.0201359	8.75073	262	0.003107	8.75217		262	0.000417	8.7457
263	0.0203806	8.75736	263	0.003157	8.75898		263	0.000436	8.75233
264	0.0206865	8.764	264	0.003208	8.76562		264	0.00046	8.75919
265	0.0209776	8.77064	265	0.003302	8.77226		265	0.000473	8.76583
266	0.0212978	8.77728	266	0.003414	8.7789		266	0.000492	8.77247
267	0.0215846	8.78391	267	0.003549	8.78553		267	0.000518	8.7791
268	0.0218574	8.79055	268	0.003636	8.79218		268	0.00055	8.78574
269	0.0221424	8.79719	269	0.003721	8.79881		269	0.000586	8.79238
270	0.0223809	8.80406	270	0.003794	8.8055		270	0.000618	8.79902
271	0.0226282	8.8107	271	0.003834	8.81232		271	0.000648	8.80565
272	0.0228411	8.81734	272	0.003857	8.81896		272	0.000672	8.81252
273	0.0230861	8.82397	273	0.003905	8.8256		273	0.000683	8.81916
274	0.02327	8.83061	274	0.003979	8.83223		274	0.000686	8.8258
275	0.0234766	8.83724	275	0.004011	8.83887		275	0.000695	8.83244
276	0.0236594	8.84389	276	0.004009	8.8455		276	0.000704	8.83908
277	0.0238321	8.85052	277	0.003981	8.85215		277	0.000707	8.84571
278	0.0239871	8.85739	278	0.003969	8.85882		278	0.000704	8.85235
279	0.0241146	8.86402	279	0.003962	8.86564		279	0.000696	8.85899
280	0.0242752	8.87066	280	0.003971	8.87228		280	0.000705	8.86585
281	0.0244241	8.8773	281	0.004021	8.87892		281	0.000716	8.87249
282	0.0245764	8.88393	282	0.004099	8.88555		282	0.000705	8.87912
283	0.0246966	8.89056	283	0.004163	8.8922		283	0.000704	8.88576
284	0.0248173	8.89719	284	0.004181	8.89884		284	0.000712	8.8924
285	0.0249053	8.90383	285	0.004193	8.90548		285	0.000715	8.89903
286	0.0250033	8.9107	286	0.004239	8.91216		286	0.00071	8.90567
287	0.0251068	8.91734	287	0.004289	8.91899		287	0.000702	8.91231
288	0.0251921	8.92398	288	0.004324	8.92563		288	0.000698	8.91918
289	0.0252477	8.93062	289	0.004373	8.93226		289	0.000699	8.92582
290	0.0252669	8.93725	290	0.004414	8.9389		290	0.000683	8.93246
291	0.0252801	8.94389	291	0.004465	8.94553		291	0.000686	8.9391
292	0.0252898	8.95053	292	0.004532	8.95218		292	0.000712	8.94573
293	0.0253363	8.95716	293	0.004587	8.95881		293	0.000757	8.95237
294	0.0253927	8.96403	294	0.004633	8.96548		294	0.000806	8.959
295	0.0254303	8.97066	295	0.00469	8.97231		295	0.000844	8.96564
296	0.0254329	8.9773	296	0.004797	8.97895		296	0.000873	8.97251
297	0.0254125	8.98394	297	0.0049	8.98558		297	0.000906	8.97914
298	0.025387	8.99058	298	0.00501	8.99223		298	0.00094	8.98578
299	0.0253774	8.99723	299	0.005105	8.99885		299	0.000968	8.99242
300	0.0253517	9.00386	300	0.005196	9.00549		300	0.000999	8.99905
301	0.025332	9.0105	301	0.005269	9.01212		301	0.001012	9.0057
302	0.0253284	9.01737	302	0.005318	9.01879		302	0.001023	9.01234
303	0.0252927	9.02401	303	0.005365	9.02563		303	0.00102	9.01898
304	0.0252183	9.03065	304	0.005423	9.03227		304	0.001001	9.02585
305	0.025142	9.03729	305	0.005476	9.0389		305	0.000982	9.03249
306	0.0250799	9.04393	306	0.00548	9.04554		306	0.000977	9.03913
307	0.0250253	9.05056	307	0.005503	9.05218		307	0.000982	9.04576
308	0.0249811	9.0572	308	0.005521	9.05882		308	0.000984	9.0524
309	0.0249228	9.06383	309	0.005553	9.06545		309	0.000995	9.05904
310	0.0248806	9.0707	310	0.005589	9.07212		310	0.001001	9.06568
311	0.0248474	9.07733	311	0.005619	9.07896		311	0.001031	9.07231
312	0.0247995	9.08397	312	0.005646	9.08559		312	0.001069	9.07918
313	0.024739	9.09061	313	0.00568	9.09223		313	0.001093	9.08581
314	0.024702	9.09725	314	0.005719	9.09887		314	0.001107	9.09245
315	0.0246777	9.10388	315	0.005759	9.10552		315	0.001132	9.09909
316	0.02464	9.11052	316	0.005824	9.11215		316	0.001157	9.10573
317	0.0245984	9.11716	317	0.005869	9.11879		317	0.001173	9.11235
318	0.0245363	9.12403	318	0.005955	9.12545		318	0.001195	9.11899
319	0.0244891	9.13067	319	0.006048	9.1323		319	0.00121	9.12562
320	0.0244331	9.13731	320	0.006113	9.13894		320	0.001215	9.13249
321	0.0243669	9.14395	321	0.006153	9.14558		321	0.001193	9.13913
322	0.0242811	9.15058	322	0.006194	9.15221		322	0.001161	9.14577
323	0.024194	9.15722	323	0.006208	9.15885		323	0.001143	9.15241
324	0.024101	9.16386	324	0.006218	9.16549		324	0.001149	9.15904
325	0.0240032	9.17049	325	0.006242	9.17213		325	0.001173	9.16568
326	0.0239179	9.17735	326	0.006244	9.17878		326	0.001192	9.17232
327	0.0238342	9.18399	327	0.006258	9.18562		327	0.001203	9.17895
328	0.0237724	9.19062	328	0.006236	9.19226		328	0.001207	9.18582
329	0.0236953	9.19727	329	0.006173	9.1989		329	0.001206	9.19245
330	0.0236271	9.2039	330	0.006105	9.20554		330	0.001214	9.19909
331	0.0235276	9.21054	331	0.006079	9.21216		331	0.001223	9.20573
332	0.0234359	9.21718	332	0.006107	9.2188		332	0.001231	9.21237
333	0.0233545	9.22381	333	0.006162	9.22543		333	0.001239	9.21902
334	0.0232847	9.23068	334	0.006197	9.23209		334	0.001241	9.22566
335	0.023226	9.23733	335	0.006216	9.23895		335	0.001224	9.23229
336	0.0231642	9.24396	336	0.006243	9.24558		336	0.001203	9.23916
337	0.023102	9.2506	337	0.006262	9.25222		337	0.001191	9.2458
338	0.0230282	9.25724	338	0.006261	9.25886		338	0.001204	9.25244
339	0.0229696	9.26387	339	0.006261	9.2655		339	0.001232	9.25908
340	0.0228963	9.27051	340	0.006289	9.27213		340	0.001252	9.26572
341	0.0228523	9.27715	341	0.006331	9.27877		341	0.001264	9.27235
342	0.0228138	9.28401	342	0.006324	9.28542		342	0.001276	9.27899
343	0.0227712	9.29065	343	0.006341	9.29227		343	0.001275	9.28562
344	0.0227138	9.29728	344	0.006377	9.2989		344	0.001272	9.29249
345	0.0226369	9.30392	345	0.006385	9.30554		345	0.001298	9.29913
346	0.0225663	9.31056	346	0.006372	9.31218		346	0.001328	9.30576
347	0.0225125	9.31718	347	0.006345	9.31882		347	0.001361	9.3124
348	0.0224703	9.32382	348	0.006322	9.32546		348	0.001369	9.31904
349	0.0223876	9.33046	349	0.006335	9.33209		349	0.00137	9.32566
350	0.0223143	9.33733	350	0.006386	9.33874		350	0.001384	9.3323
351	0.0222541	9.34397	351	0.006411	9.3456		351	0.001408	9.33893
352	0.0222039	9.35061	352	0.006431	9.35224		352	0.001441	9.34581
353	0.022142	9.35725	353	0.006427	9.35887		353	0.001486	9.35245
354	0.02207	9.36387	354	0.006418	9.36552		354	0.001536	9.35908
355	0.0220198	9.37052	355	0.006437	9.37215		355	0.001558	9.36572
356	0.0219736	9.37715	356	0.006473	9.37879		356	0.001573	9.37236
357	0.021912	9.38379	357	0.006523	9.38543		357	0.001584	9.379
358	0.0218418	9.39065	358	0.006581	9.39207		358	0.0016	9.38563
359	0.0218109	9.39729	359	0.006618	9.39893		359	0.00162	9.39227
360	0.0217894	9.40393	360	0.006612	9.40556		360	0.001635	9.39913
361	0.0217602	9.41057	361	0.006591	9.4122		361	0.001644	9.40577
362	0.0217029	9.4172	362	0.006575	9.41884		362	0.001647	9.4124
363	0.0216286	9.42385	363	0.006556	9.42547		363	0.001678	9.41905
364	0.0215839	9.43049	364	0.006541	9.43211		364	0.001706	9.42568
365	0.0215722	9.43713	365	0.006515	9.43875		365	0.001713	9.43232
366	0.0215534	9.444	366	0.006468	9.44539		366	0.001718	9.43896
367	0.0214905	9.45064	367	0.006417	9.45226		367	0.001732	9.44559
368	0.0214312	9.45728	368	0.006376	9.4589		368	0.001746	9.45246
369	0.021371	9.46392	369	0.006339	9.46554		369	0.001759	9.45911
370	0.0213058	9.47055	370	0.006313	9.47217		370	0.001782	9.46574
371	0.0212399	9.47719	371	0.006303	9.47881		371	0.001811	9.47238
372	0.0211994	9.48382	372	0.006287	9.48545		372	0.001864	9.47902
373	0.0211908	9.49046	373	0.006271	9.49208		373	0.001889	9.48565
374	0.0211765	9.49732	374	0.006269	9.49872		374	0.001894	9.49229
375	0.0211284	9.50396	375	0.006294	9.50558		375	0.001913	9.49893
376	0.0210776	9.51059	376	0.006328	9.51222		376	0.001957	9.50579
377	0.0210705	9.51724	377	0.006344	9.51886		377	0.002008	9.51242
378	0.0210481	9.52388	378	0.006352	9.5255		378	0.002054	9.51906
379	0.021018	9.53051	379	0.006353	9.53214		379	0.0021	9.5257
380	0.0209812	9.53714	380	0.006343	9.53878		380	0.002136	9.53234
381	0.0209341	9.54378	381	0.006346	9.54542		381	0.002182	9.53897
382	0.020886	9.55065	382	0.006358	9.55206		382	0.002205	9.54561
383	0.0208425	9.55729	383	0.006376	9.55893		383	0.002241	9.55225
384	0.0207989	9.56393	384	0.006384	9.56557		384	0.002301	9.55912
385	0.0207489	9.57057	385	0.006372	9.57221		385	0.002369	9.56576
386	0.0207015	9.5772	386	0.006354	9.57884		386	0.002423	9.57239
387	0.0206552	9.58384	387	0.006352	9.58548		387	0.002466	9.57903
388	0.0206294	9.59048	388	0.006356	9.59212		388	0.002515	9.58567
389	0.0206133	9.59712	389	0.006367	9.59875		389	0.002561	9.59231
390	0.0206052	9.60398	390	0.006369	9.60539		390	0.002617	9.59895
391	0.0206018	9.61062	391	0.006356	9.61225		391	0.002662	9.60558
392	0.020586	9.61725	392	0.00635	9.61889		392	0.002712	9.61245
393	0.0205643	9.62389	393	0.006349	9.62553		393	0.00275	9.61908
394	0.0205121	9.63053	394	0.006334	9.63216		394	0.002796	9.62572
395	0.0204664	9.63715	395	0.006303	9.6388		395	0.002848	9.63236
396	0.0204169	9.64379	396	0.006286	9.64544		396	0.002902	9.63899
397	0.0203658	9.65043	397	0.006303	9.65207		397	0.002963	9.64564
398	0.0203215	9.65729	398	0.006313	9.65872		398	0.003019	9.65227
399	0.0202818	9.66394	399	0.006296	9.66558		399	0.003105	9.65891
400	0.0202294	9.67057	400	0.006276	9.67222		400	0.00318	9.66577
401	0.0201541	9.67722	401	0.006269	9.67886		401	0.003251	9.67242
402	0.0200912	9.68385	402	0.006258	9.6855		402	0.003316	9.67906
403	0.0200463	9.69049	403	0.00624	9.69213		403	0.003398	9.68569
404	0.020032	9.69712	404	0.006236	9.69877		404	0.003482	9.69233
405	0.0200064	9.70376	405	0.006257	9.70541		405	0.003557	9.69897
406	0.0199821	9.71062	406	0.006295	9.71205		406	0.003631	9.7056
407	0.0199674	9.71726	407	0.006299	9.71891		407	0.003697	9.71224
408	0.019952	9.72389	408	0.006308	9.72555		408	0.00379	9.7191
409	0.0199186	9.73054	409	0.006346	9.73218		409	0.003851	9.72574
410	0.0198759	9.73718	410	0.006371	9.73882		410	0.003922	9.73237
411	0.019861	9.74382	411	0.006371	9.74545		411	0.003999	9.73901
412	0.0198552	9.75046	412	0.006354	9.75208		412	0.004083	9.74565
413	0.0198326	9.7571	413	0.006321	9.75872		413	0.00415	9.7523
414	0.0197667	9.76395	414	0.006288	9.76536		414	0.004219	9.75894
415	0.0197063	9.77061	415	0.006276	9.77223		415	0.004307	9.76557
416	0.0196613	9.77725	416	0.006244	9.77887		416	0.004392	9.77244
417	0.0196148	9.78388	417	0.006222	9.78551		417	0.004473	9.77909
418	0.0195652	9.79052	418	0.006197	9.79215		418	0.004526	9.78572
419	0.0195336	9.79716	419	0.006156	9.79878		419	0.00463	9.79236
420	0.0195236	9.80379	420	0.006133	9.80542		420	0.004727	9.799
421	0.0195101	9.81043	421	0.006131	9.81205		421	0.004823	9.80563
422	0.0194862	9.81728	422	0.006147	9.81869		422	0.004913	9.81227
423	0.0194641	9.82393	423	0.006176	9.82555		423	0.005014	9.81891
424	0.0194854	9.83057	424	0.006195	9.83219		424	0.005122	9.82577
425	0.0195048	9.8372	425	0.006192	9.83883		425	0.005213	9.83241
426	0.0195082	9.84384	426	0.006217	9.84546		426	0.005323	9.83904
427	0.0194958	9.85048	427	0.006233	9.85211		427	0.005435	9.84568
428	0.0194706	9.85712	428	0.006224	9.85875		428	0.005569	9.85232
429	0.0194476	9.86375	429	0.00622	9.86539		429	0.005653	9.85895
430	0.0194441	9.8706	430	0.006208	9.87203		430	0.00574	9.86558
431	0.0194429	9.87726	431	0.006175	9.8789		431	0.005828	9.87222
432	0.0194227	9.8839	432	0.006144	9.88554		432	0.005934	9.87908
433	0.0193994	9.89054	433	0.006145	9.89218		433	0.006044	9.88573
434	0.0193981	9.89718	434	0.006153	9.89881		434	0.006136	9.89236
435	0.0194139	9.90381	435	0.006114	9.90545		435	0.006232	9.899
436	0.0194295	9.91045	436	0.006046	9.91209		436	0.006311	9.90564
437	0.0194487	9.91709	437	0.005997	9.91873		437	0.006405	9.91227
438	0.0194798	9.92392	438	0.00598	9.92536		438	0.006477	9.91892
439	0.0195139	9.93059	439	0.005957	9.93222		439	0.006569	9.92555
440	0.019529	9.93722	440	0.005929	9.93886		440	0.00666	9.9324
441	0.0195487	9.94386	441	0.005925	9.94549		441	0.00676	9.93905
442	0.0195874	9.9505	442	0.005937	9.95214		442	0.006849	9.94569
443	0.0196067	9.95714	443	0.005918	9.95877		443	0.006927	9.95233
444	0.019596	9.96377	444	0.005874	9.96541		444	0.007009	9.95896
445	0.0195988	9.97041	445	0.005875	9.97204		445	0.007085	9.96561
446	0.0196279	9.97725	446	0.005891	9.97869		446	0.007192	9.97225
447	0.0196577	9.98392	447	0.005892	9.98555		447	0.007283	9.97889
448	0.0196727	9.99056	448	0.005876	9.9922		448	0.007389	9.98574
449	0.0196784	9.99719	449	0.005866	9.99883		449	0.007477	9.9924
450	0.019696	10.0038	450	0.005865	10.0055		450	0.007558	9.99903
451	0.019709	10.0105	451	0.005828	10.0121		451	0.007628	10.0057
452	0.0197258	10.0171	452	0.005766	10.0187		452	0.007693	10.0123
453	0.0197642	10.0237	453	0.005757	10.0254		453	0.007757	10.019
454	0.0198314	10.0306	454	0.005773	10.032		454	0.007818	10.0256
455	0.0198909	10.0372	455	0.00578	10.0389		455	0.007904	10.0322
456	0.0199162	10.0439	456	0.005773	10.0455		456	0.007959	10.0391
457	0.0199262	10.0505	457	0.00573	10.0521		457	0.008041	10.0457
458	0.0199513	10.0572	458	0.005675	10.0588		458	0.008109	10.0524
459	0.0199911	10.0638	459	0.005644	10.0654		459	0.008182	10.059
460	0.0200189	10.0704	460	0.005656	10.0721		460	0.008263	10.0656
461	0.0200447	10.0771	461	0.005696	10.0787		461	0.008349	10.0723
462	0.0200663	10.0839	462	0.005754	10.0853		462	0.008436	10.0789
463	0.0201001	10.0906	463	0.005761	10.0922		463	0.008521	10.0855
464	0.0201185	10.0972	464	0.00575	10.0989		464	0.008608	10.0924
465	0.0201405	10.1038	465	0.005741	10.1055		465	0.008668	10.099
466	0.0201953	10.1105	466	0.005726	10.1121		466	0.008752	10.1057
467	0.0202699	10.1171	467	0.005734	10.1188		467	0.008811	10.1123
468	0.0203414	10.1238	468	0.005773	10.1254		468	0.008871	10.1189
469	0.0203978	10.1304	469	0.00583	10.132		469	0.008923	10.1256
470	0.0204942	10.1372	470	0.005857	10.1387		470	0.008973	10.1322
471	0.0205981	10.1439	471	0.005884	10.1455		471	0.009024	10.1389
472	0.020725	10.1505	472	0.00589	10.1522		472	0.009071	10.1457
473	0.0208529	10.1572	473	0.005852	10.1588		473	0.00912	10.1524
474	0.0209701	10.1638	474	0.005814	10.1654		474	0.009161	10.159
475	0.0210584	10.1705	475	0.005795	10.1721		475	0.009228	10.1656
476	0.0211303	10.1771	476	0.0058	10.1787		476	0.009275	10.1723
477	0.0212641	10.1837	477	0.005816	10.1853		477	0.009341	10.1789
478	0.0213981	10.1905	478	0.005835	10.192		478	0.009415	10.1855
479	0.0215362	10.1972	479	0.00582	10.1989		479	0.0095	10.1922
480	0.0216351	10.2039	480	0.0058	10.2055		480	0.009596	10.199
481	0.0217478	10.2105	481	0.005778	10.2121		481	0.009688	10.2057
482	0.0218506	10.2171	482	0.005766	10.2188		482	0.009775	10.2123
483	0.0219553	10.2238	483	0.005804	10.2254		483	0.009859	10.219
484	0.0220889	10.2304	484	0.005857	10.232		484	0.009965	10.2256
485	0.0222348	10.2371	485	0.005896	10.2387		485	0.010044	10.2323
486	0.0223832	10.2439	486	0.005918	10.2453		486	0.010123	10.2389
487	0.0224697	10.2506	487	0.005927	10.2522		487	0.010181	10.2455
488	0.022605	10.2572	488	0.005923	10.2588		488	0.010243	10.2523
489	0.0227384	10.2638	489	0.005892	10.2654		489	0.010312	10.259
490	0.0228736	10.2705	490	0.005863	10.2721		490	0.010371	10.2657
491	0.0229906	10.2771	491	0.005842	10.2787		491	0.010445	10.2723
492	0.0231219	10.2837	492	0.005816	10.2854		492	0.010521	10.2789
493	0.0232718	10.2904	493	0.005781	10.292		493	0.010598	10.2856
494	0.023402	10.2972	494	0.005743	10.2987		494	0.010653	10.2922
495	0.0235484	10.3039	495	0.005706	10.3055		495	0.010727	10.2988
496	0.0236869	10.3105	496	0.005663	10.3122		496	0.010806	10.3057
497	0.0238573	10.3172	497	0.005629	10.3188		497	0.010896	10.3124
498	0.0239831	10.3238	498	0.005598	10.3254		498	0.010981	10.319
499	0.0241155	10.3304	499	0.005593	10.3321		499	0.011057	10.3256
500	0.0242507	10.3371	500	0.00563	10.3387		500	0.011148	10.3323
501	0.0244012	10.3437	501	0.005671	10.3453		501	0.011227	10.3389
502	0.0245541	10.3505	502	0.005694	10.352		502	0.011317	10.3455
503	0.0246779	10.3572	503	0.005709	10.3589		503	0.011407	10.3522
504	0.0248267	10.3638	504	0.005718	10.3655		504	0.011519	10.359
505	0.0249573	10.3705	505	0.005704	10.3721		505	0.011619	10.3657
506	0.0251201	10.3771	506	0.005698	10.3788		506	0.011729	10.3723
507	0.0252539	10.3838	507	0.005748	10.3854		507	0.011848	10.3789
508	0.025392	10.3904	508	0.005796	10.392		508	0.011959	10.3856
509	0.0255247	10.397	509	0.00584	10.3987		509	0.012069	10.3922
510	0.0256584	10.4038	510	0.005845	10.4053		510	0.012161	10.3989
511	0.0257822	10.4105	511	0.005809	10.4122		511	0.012289	10.4055
512	0.0258907	10.4172	512	0.005765	10.4188		512	0.012406	10.4123
513	0.0260384	10.4238	513	0.005744	10.4255		513	0.012566	10.419
514	0.0261571	10.4304	514	0.005748	10.4321		514	0.012721	10.4256
515	0.0263005	10.4371	515	0.005776	10.4387		515	0.01286	10.4323
516	0.0264121	10.4437	516	0.005783	10.4454		516	0.012976	10.4389
517	0.0265279	10.4504	517	0.005733	10.452		517	0.013085	10.4456
518	0.0266387	10.4571	518	0.005667	10.4586		518	0.013228	10.4522
519	0.0267603	10.4639	519	0.005603	10.4655		519	0.013364	10.4588
520	0.0268952	10.4705	520	0.00554	10.4721		520	0.013526	10.4656
521	0.027023	10.4771	521	0.005505	10.4788		521	0.013651	10.4723
522	0.0271349	10.4838	522	0.0055	10.4854		522	0.0138	10.479
523	0.0272023	10.4904	523	0.005498	10.492		523	0.013911	10.4856
524	0.0272645	10.4971	524	0.005473	10.4987		524	0.01402	10.4923
525	0.0273019	10.5037	525	0.005426	10.5053		525	0.01415	10.4989
526	0.0273406	10.5105	526	0.005398	10.512		526	0.014299	10.5055
527	0.0273729	10.5172	527	0.005368	10.5188		527	0.014465	10.5122
528	0.0274248	10.5238	528	0.005353	10.5255		528	0.014596	10.519
529	0.0274897	10.5305	529	0.005332	10.5321		529	0.014739	10.5257
530	0.0275394	10.5371	530	0.005306	10.5387		530	0.014856	10.5323
531	0.027605	10.5437	531	0.005285	10.5454		531	0.015013	10.539
532	0.0276724	10.5504	532	0.005259	10.552		532	0.015161	10.5456
533	0.0277488	10.557	533	0.005222	10.5587		533	0.015319	10.5522
534	0.0278309	10.5638	534	0.005197	10.5653		534	0.015476	10.5589
535	0.0279379	10.5705	535	0.005197	10.5722		535	0.015627	10.5655
536	0.0280546	10.5772	536	0.005176	10.5788		536	0.015784	10.5723
537	0.0281612	10.5838	537	0.005158	10.5854		537	0.015907	10.579
538	0.0282335	10.5904	538	0.005183	10.5921		538	0.016057	10.5856
539	0.0282769	10.5971	539	0.005234	10.5987		539	0.016194	10.5923
540	0.0283103	10.6037	540	0.005288	10.6053		540	0.016353	10.5989
541	0.0283281	10.6103	541	0.005336	10.612		541	0.016478	10.6055
542	0.0284161	10.6171	542	0.005373	10.6186		542	0.016612	10.6122
543	0.0284996	10.6239	543	0.00536	10.6255		543	0.016755	10.6188
544	0.0285686	10.6305	544	0.005341	10.6321		544	0.016888	10.6256
545	0.0286076	10.6371	545	0.005336	10.6388		545	0.017026	10.6323
546	0.0286406	10.6438	546	0.005354	10.6454		546	0.017151	10.639
547	0.0286897	10.6504	547	0.005365	10.652		547	0.017323	10.6456
548	0.028746	10.657	548	0.005328	10.6587		548	0.017468	10.6522
549	0.0287899	10.6637	549	0.00528	10.6653		549	0.017646	10.6589
550	0.0288396	10.6704	550	0.005245	10.672		550	0.017814	10.6655
551	0.0289109	10.6772	551	0.005216	10.6788		551	0.01799	10.6721
552	0.028913	10.6838	552	0.005228	10.6854		552	0.018153	10.6789
553	0.0288952	10.6905	553	0.005288	10.6921		553	0.018299	10.6857
554	0.0288846	10.6971	554	0.005325	10.6987		554	0.018467	10.6923
555	0.0288731	10.7037	555	0.005345	10.7053		555	0.018622	10.6989
556	0.0288497	10.7104	556	0.00533	10.712		556	0.018821	10.7056
557	0.028826	10.717	557	0.005305	10.7186		557	0.018977	10.7122
558	0.0288262	10.7237	558	0.005287	10.7253		558	0.019158	10.7188
559	0.0288405	10.7305	559	0.005264	10.7321		559	0.019315	10.7255
560	0.0288381	10.7372	560	0.005242	10.7388		560	0.019467	10.7323
561	0.0288141	10.7438	561	0.005265	10.7454		561	0.019611	10.739
562	0.0288003	10.7504	562	0.005254	10.7521		562	0.019758	10.7456
563	0.0288051	10.7571	563	0.005206	10.7587		563	0.019951	10.7523
564	0.0288257	10.7637	564	0.00518	10.7653		564	0.020119	10.7589
565	0.0288598	10.7703	565	0.005152	10.772		565	0.020316	10.7655
566	0.0288861	10.7771	566	0.005155	10.7786		566	0.020466	10.7722
567	0.0288731	10.7838	567	0.005179	10.7855		567	0.020624	10.7788
568	0.0288419	10.7905	568	0.005204	10.7921		568	0.020762	10.7856
569	0.0288306	10.7971	569	0.005227	10.7987		569	0.020923	10.7923
570	0.0288359	10.8037	570	0.00524	10.8054		570	0.021105	10.7989
571	0.0288466	10.8104	571	0.005205	10.812		571	0.021285	10.8056
572	0.0288472	10.817	572	0.005186	10.8187		572	0.021458	10.8122
573	0.0288302	10.8236	573	0.005204	10.8253		573	0.021582	10.8188
574	0.0287926	10.8304	574	0.005225	10.8319		574	0.021746	10.8255
575	0.0287477	10.8372	575	0.005251	10.8388		575	0.02188	10.8321
576	0.0287164	10.8438	576	0.005272	10.8454		576	0.022052	10.8389
577	0.028718	10.8504	577	0.005285	10.8521		577	0.022221	10.8456
578	0.0287163	10.8571	578	0.005288	10.8587		578	0.022404	10.8523
579	0.0286948	10.8637	579	0.005273	10.8653		579	0.02257	10.8589
580	0.0286703	10.8704	580	0.005255	10.872		580	0.022714	10.8656
581	0.0286398	10.877	581	0.005226	10.8786		581	0.022871	10.8722
582	0.0286162	10.8837	582	0.005182	10.8853		582	0.023018	10.8788
583	0.0286122	10.8905	583	0.005142	10.8921		583	0.0232	10.8855
584	0.0286046	10.8971	584	0.005101	10.8988		584	0.023342	10.8922
585	0.0285704	10.9038	585	0.005062	10.9054		585	0.023524	10.899
586	0.028536	10.9104	586	0.00503	10.912		586	0.02368	10.9056
587	0.0284983	10.917	587	0.004994	10.9187		587	0.023846	10.9122
588	0.0284622	10.9237	588	0.004949	10.9253		588	0.024014	10.9189
589	0.0284337	10.9303	589	0.004926	10.9319		589	0.024176	10.9255
590	0.0284088	10.937	590	0.004961	10.9386		590	0.024355	10.9322
591	0.0283723	10.9438	591	0.005006	10.9454		591	0.024517	10.9388
592	0.0283211	10.9505	592	0.005047	10.9521		592	0.024711	10.9455
593	0.0282661	10.9571	593	0.005083	10.9587		593	0.024865	10.9523
594	0.0282284	10.9637	594	0.005092	10.9654		594	0.025059	10.9589
595	0.0282197	10.9704	595	0.005085	10.972		595	0.025225	10.9656
596	0.0282218	10.977	596	0.005076	10.9786		596	0.025409	10.9722
597	0.0282274	10.9837	597	0.005075	10.9853		597	0.025594	10.9788
598	0.0282071	10.9904	598	0.005093	10.9919		598	0.025774	10.9855
599	0.0281776	10.9972	599	0.005128	10.9988		599	0.02597	10.9921
600	0.0281626	11.0038	600	0.005106	11.0054		600	0.026146	10.9988
601	0.028167	11.0104	601	0.005097	11.0121		601	0.026337	11.0056
602	0.0281639	11.0171	602	0.005092	11.0187		602	0.026497	11.0122
603	0.0281393	11.0237	603	0.005085	11.0253		603	0.026726	11.0189
604	0.0281088	11.0303	604	0.005102	11.032		604	0.026926	11.0255
605	0.0280572	11.037	605	0.005122	11.0386		605	0.027127	11.0322
606	0.0279953	11.0437	606	0.005125	11.0452		606	0.027306	11.0388
607	0.027951	11.0505	607	0.005125	11.0521		607	0.027481	11.0454
608	0.027934	11.0571	608	0.005097	11.0588		608	0.027669	11.0522
609	0.0278965	11.0638	609	0.005045	11.0654		609	0.027835	11.059
610	0.027835	11.0704	610	0.005048	11.072		610	0.02806	11.0656
611	0.0277655	11.077	611	0.005043	11.0787		611	0.02827	11.0722
612	0.0277099	11.0837	612	0.005005	11.0853		612	0.028521	11.0789
613	0.0276787	11.0903	613	0.004957	11.092		613	0.028708	11.0855
614	0.0276651	11.097	614	0.004911	11.0986		614	0.02891	11.0921
615	0.0276705	11.1038	615	0.004877	11.1054		615	0.029114	11.0988
616	0.0276794	11.1104	616	0.004864	11.1121		616	0.029329	11.1055
617	0.0276707	11.1171	617	0.004863	11.1187		617	0.029563	11.1123
618	0.0276457	11.1237	618	0.004889	11.1254		618	0.029773	11.1189
619	0.0276387	11.1303	619	0.004947	11.132		619	0.03001	11.1256
620	0.0276195	11.137	620	0.004951	11.1386		620	0.030186	11.1322
621	0.0275844	11.1436	621	0.004888	11.1453		621	0.030406	11.1388
622	0.0275623	11.1503	622	0.004842	11.1519		622	0.030588	11.1455
623	0.0275598	11.1571	623	0.00483	11.1588		623	0.030803	11.1521
624	0.0275425	11.1638	624	0.004836	11.1654		624	0.031015	11.1588
625	0.0275194	11.1704	625	0.004835	11.1721		625	0.03123	11.1656
626	0.0274927	11.177	626	0.004821	11.1787		626	0.031451	11.1722
627	0.0274646	11.1837	627	0.004797	11.1853		627	0.031647	11.1789
628	0.0274509	11.1903	628	0.004752	11.192		628	0.031882	11.1855
629	0.0274304	11.197	629	0.004674	11.1986		629	0.032085	11.1922
630	0.0274214	11.2036	630	0.004603	11.2052		630	0.032329	11.1988
631	0.0274297	11.2105	631	0.004596	11.2121		631	0.032529	11.2054
632	0.0274276	11.2171	632	0.004643	11.2187		632	0.032745	11.2121
633	0.0274012	11.2237	633	0.004694	11.2254		633	0.032928	11.2189
634	0.0273531	11.2304	634	0.004717	11.232		634	0.033109	11.2256
635	0.0273109	11.237	635	0.004729	11.2386		635	0.033289	11.2322
636	0.0272821	11.2437	636	0.004754	11.2453		636	0.033461	11.2388
637	0.0272585	11.2503	637	0.004799	11.2519		637	0.033677	11.2455
638	0.0272401	11.257	638	0.004865	11.2585		638	0.033848	11.2521
639	0.027237	11.2638	639	0.004908	11.2654		639	0.03407	11.2588
640	0.0272415	11.2704	640	0.004941	11.2721		640	0.034253	11.2655
641	0.0272411	11.2771	641	0.004971	11.2787		641	0.034476	11.2723
642	0.0272388	11.2837	642	0.00496	11.2853		642	0.034694	11.2789
643	0.0272372	11.2903	643	0.004929	11.292		643	0.034934	11.2856
644	0.0272579	11.297	644	0.004918	11.2986		644	0.035182	11.2922
645	0.0272876	11.3036	645	0.00492	11.3052		645	0.035419	11.2988
646	0.0273055	11.3103	646	0.004884	11.3119		646	0.035657	11.3055
647	0.0273325	11.3171	647	0.004829	11.3187		647	0.035841	11.3121
648	0.0273647	11.3238	648	0.004754	11.3254		648	0.036073	11.3188
649	0.0273944	11.3304	649	0.004699	11.332		649	0.036256	11.3256
650	0.0274296	11.337	650	0.004654	11.3387		650	0.036465	11.3322
651	0.0274677	11.3437	651	0.004613	11.3453		651	0.036642	11.3389
652	0.0274978	11.3503	652	0.004593	11.352		652	0.036822	11.3455
653	0.0275276	11.3569	653	0.004598	11.3586		653	0.036991	11.3521
654	0.0275595	11.3636	654	0.004591	11.3652		654	0.037144	11.3588
655	0.0275829	11.3705	655	0.004567	11.3721		655	0.037353	11.3654
656	0.0276258	11.3771	656	0.004579	11.3787		656	0.037545	11.3721
657	0.0276726	11.3837	657	0.004577	11.3854		657	0.037756	11.3789
658	0.0277137	11.3904	658	0.004591	11.392		658	0.03792	11.3856
659	0.0277606	11.397	659	0.004592	11.3986		659	0.038109	11.3922
660	0.0278036	11.4036	660	0.004577	11.4053		660	0.038282	11.3988
661	0.0278436	11.4103	661	0.004576	11.4119		661	0.038479	11.4055
662	0.0278915	11.4169	662	0.004597	11.4185		662	0.038693	11.4121
663	0.0279642	11.4238	663	0.004585	11.4254		663	0.038897	11.4187
664	0.0280388	11.4304	664	0.004577	11.4321		664	0.039111	11.4254
665	0.0281244	11.4371	665	0.00459	11.4387		665	0.039266	11.4322
666	0.0281964	11.4437	666	0.00461	11.4453		666	0.039448	11.4389
667	0.0282657	11.4503	667	0.004646	11.452		667	0.039612	11.4455
668	0.0283581	11.457	668	0.004668	11.4586		668	0.039813	11.4522
669	0.0284423	11.4636	669	0.004693	11.4652		669	0.039994	11.4588
670	0.0285216	11.4703	670	0.004744	11.4719		670	0.040201	11.4655
671	0.028605	11.4771	671	0.004809	11.4787		671	0.040398	11.4721
672	0.0287312	11.4837	672	0.004831	11.4854		672	0.040574	11.4787
673	0.0288385	11.4904	673	0.00481	11.492		673	0.040766	11.4856
674	0.0289326	11.497	674	0.004788	11.4986		674	0.04094	11.4922
675	0.0290109	11.5037	675	0.004771	11.5053		675	0.041141	11.4989
676	0.0290807	11.5103	676	0.004749	11.5119		676	0.041313	11.5055
677	0.0291352	11.5169	677	0.004748	11.5186		677	0.041539	11.5121
678	0.0291696	11.5236	678	0.004776	11.5252		678	0.041734	11.5188
679	0.0292579	11.5304	679	0.004826	11.5321		679	0.041966	11.5254
680	0.0293512	11.5371	680	0.004874	11.5387		680	0.042195	11.5321
681	0.0294565	11.5437	681	0.004883	11.5453		681	0.042415	11.5389
682	0.0295212	11.5503	682	0.004851	11.552		682	0.042643	11.5456
683	0.0295966	11.557	683	0.004863	11.5586		683	0.042856	11.5522
684	0.0296913	11.5636	684	0.004905	11.5653		684	0.043121	11.5588
685	0.0298049	11.5702	685	0.004947	11.5719		685	0.043356	11.5655
686	0.0299429	11.5769	686	0.004975	11.5785		686	0.043661	11.5721
687	0.0300866	11.5838	687	0.004971	11.5854		687	0.043923	11.5787
688	0.0302499	11.5904	688	0.004975	11.592		688	0.044234	11.5854
689	0.03036	11.597	689	0.005014	11.5987		689	0.044531	11.5922
690	0.0304798	11.6037	690	0.005035	11.6053		690	0.044821	11.5989
691	0.0305885	11.6103	691	0.005032	11.612		691	0.045133	11.6055
692	0.030718	11.6169	692	0.005073	11.6186		692	0.045434	11.6121
693	0.03084	11.6236	693	0.005108	11.6252		693	0.045827	11.6188
694	0.0309726	11.6302	694	0.005112	11.6319		694	0.046165	11.6254
695	0.031113	11.6371	695	0.005116	11.6387		695	0.046607	11.6321
696	0.0312289	11.6437	696	0.005137	11.6454		696	0.046997	11.6387
697	0.0313377	11.6504	697	0.005157	11.652		697	0.047438	11.6456
698	0.0314199	11.657	698	0.005135	11.6586		698	0.047858	11.6522
699	0.0315179	11.6636	699	0.005073	11.6653		699	0.04831	11.6588
700	0.0316063	11.6703	700	0.005042	11.6719		700	0.048822	11.6655
701	0.0317312	11.6769	701	0.005043	11.6785		701	0.049327	11.6721
702	0.0318463	11.6836	702	0.005076	11.6852		702	0.049953	11.6788
703	0.0319613	11.6904	703	0.005123	11.6921		703	0.050479	11.6854
704	0.0320646	11.6971	704	0.00515	11.6987		704	0.051196	11.6921
705	0.0321552	11.7037	705	0.005158	11.7053		705	0.051816	11.6989
706	0.0322775	11.7103	706	0.005165	11.712		706	0.052562	11.7055
707	0.0324026	11.717	707	0.005187	11.7186		707	0.053306	11.7122
708	0.0325173	11.7236	708	0.005231	11.7252		708	0.054119	11.7188
709	0.0326161	11.7302	709	0.005277	11.7319		709	0.055001	11.7255
710	0.0327474	11.7369	710	0.005294	11.7385		710	0.055862	11.7321
711	0.0328504	11.7437	711	0.005286	11.7454		711	0.056896	11.7387
712	0.0329542	11.7504	712	0.005239	11.752		712	0.057806	11.7454
713	0.0330608	11.757	713	0.005192	11.7586		713	0.059036	11.7522
714	0.0331665	11.7637	714	0.005173	11.7653		714	0.060076	11.7589
715	0.0332834	11.7703	715	0.005168	11.7719		715	0.061354	11.7655
716	0.0333698	11.7769	716	0.00516	11.7786		716	0.06256	11.7721
717	0.0334598	11.7836	717	0.005153	11.7852		717	0.063945	11.7788
718	0.0335597	11.7902	718	0.005215	11.7918		718	0.065413	11.7854
719	0.0336737	11.7971	719	0.005274	11.7987		719	0.066896	11.792
720	0.0337574	11.8037	720	0.005268	11.8054		720	0.068627	11.7987
721	0.0338515	11.8104	721	0.005279	11.812		721	0.070194	11.8056
722	0.0339447	11.817	722	0.005317	11.8186		722	0.072203	11.8122
723	0.0340314	11.8236	723	0.005356	11.8253		723	0.073892	11.8188
724	0.0341196	11.8303	724	0.005378	11.8319		724	0.07608	11.8255
725	0.0341929	11.8369	725	0.005387	11.8385		725	0.078101	11.8321
726	0.0342973	11.8435	726	0.005412	11.8452		726	0.080414	11.8387
727	0.0343981	11.8504	727	0.005482	11.852		727	0.082772	11.8454
728	0.0345041	11.857	728	0.005482	11.8587		728	0.085192	11.852
729	0.0345966	11.8637	729	0.00541	11.8653		729	0.087947	11.8589
730	0.0346838	11.8703	730	0.0054	11.8719		730	0.090451	11.8655
731	0.0347498	11.8769	731	0.005425	11.8786		731	0.093612	11.8721
732	0.034828	11.8836	732	0.00544	11.8852		732	0.096325	11.8788
733	0.0349421	11.8902	733	0.005452	11.8919		733	0.099789	11.8854
734	0.0350468	11.8969	734	0.005483	11.8985		734	0.102878	11.8921
735	0.0351465	11.9037	735	0.005519	11.9054		735	0.106453	11.8987
736	0.035215	11.9104	736	0.005516	11.912		736	0.110045	11.9054
737	0.035287	11.917	737	0.005462	11.9186		737	0.113732	11.9122
738	0.0353541	11.9236	738	0.005408	11.9253		738	0.117845	11.9189
739	0.0354261	11.9303	739	0.005425	11.9319		739	0.121613	11.9255
740	0.0355039	11.9369	740	0.005463	11.9386		740	0.126341	11.9321
741	0.035579	11.9435	741	0.00548	11.9452		741	0.130372	11.9388
742	0.0356221	11.9502	742	0.005525	11.9518		742	0.135524	11.9454
743	0.0356281	11.957	743	0.005597	11.9587		743	0.140076	11.952
744	0.0356646	11.9637	744	0.005656	11.9653		744	0.145388	11.9587
745	0.0357	11.9703	745	0.005711	11.972		745	0.150585	11.9655
746	0.0357122	11.977	746	0.005786	11.9786		746	0.156019	11.9722
747	0.0357177	11.9836	747	0.005834	11.9853		747	0.161857	11.9788
748	0.0357404	11.9902	748	0.005882	11.9919		748	0.167352	11.9855
749	0.0357677	11.9969	749	0.005918	11.9985		749	0.173878	11.9921
750	0.0357922	12.0035	750	0.005934	12.0051		750	0.179384	11.9987
751	0.035821	12.0104	751	0.005974	12.012		751	0.186518	12.0054
752	0.0358526	12.017	752	0.005995	12.0187		752	0.192531	12.012
753	0.0358551	12.0237	753	0.00598	12.0253		753	0.199745	12.0189
754	0.035827	12.0303	754	0.005966	12.0319		754	0.206507	12.0255
755	0.0358238	12.0369	755	0.005963	12.0386		755	0.213735	12.0321
756	0.035846	12.0436	756	0.005965	12.0452		756	0.221344	12.0388
757	0.0358878	12.0502	757	0.005993	12.0518		757	0.228647	12.0454
758	0.0359261	12.0569	758	0.005993	12.0585		758	0.237128	12.0521
759	0.0359476	12.0637	759	0.006004	12.0653		759	0.24452	12.0587
760	0.0359529	12.0704	760	0.006039	12.072		760	0.253824	12.0653
761	0.0359579	12.077	761	0.006055	12.0786		761	0.261502	12.0722
762	0.0359641	12.0836	762	0.00604	12.0853		762	0.270842	12.0788
763	0.0359952	12.0903	763	0.006014	12.0919		763	0.279244	12.0855
764	0.0360449	12.0969	764	0.006	12.0985		764	0.288458	12.0921
765	0.0360734	12.1035	765	0.006009	12.1052		765	0.297652	12.0987
766	0.0360743	12.1102	766	0.006016	12.1118		766	0.306499	12.1054
767	0.0360404	12.117	767	0.006061	12.1187		767	0.316542	12.112
768	0.036001	12.1237	768	0.006134	12.1253		768	0.325214	12.1187
769	0.0359837	12.1303	769	0.006194	12.132		769	0.335985	12.1255
770	0.0359809	12.137	770	0.006227	12.1386		770	0.344842	12.1321
771	0.0359617	12.1436	771	0.006271	12.1452		771	0.355704	12.1388
772	0.0359455	12.1502	772	0.006345	12.1519		772	0.365343	12.1454
773	0.0359175	12.1569	773	0.006425	12.1585		773	0.375984	12.1521
774	0.0358692	12.1635	774	0.006484	12.1652		774	0.386499	12.1587
775	0.0358169	12.1704	775	0.006526	12.172		775	0.396952	12.1653
776	0.0357896	12.177	776	0.006605	12.1786		776	0.40838	12.172
777	0.0357785	12.1836	777	0.006646	12.1853		777	0.418287	12.1788
778	0.0357551	12.1903	778	0.006737	12.1919		778	0.430414	12.1855
779	0.0357154	12.1969	779	0.006848	12.1986		779	0.440363	12.1921
780	0.035671	12.2036	780	0.006939	12.2052		780	0.452193	12.1988
781	0.0356432	12.2102	781	0.006998	12.2118		781	0.462678	12.2054
782	0.0356338	12.2168	782	0.007024	12.2185		782	0.473971	12.212
783	0.0356375	12.2237	783	0.007037	12.2253		783	0.485196	12.2187
784	0.035622	12.2303	784	0.007069	12.232		784	0.495921	12.2253
785	0.0355963	12.237	785	0.007125	12.2386		785	0.507749	12.2322
786	0.0355696	12.2436	786	0.007144	12.2452		786	0.517952	12.2388
787	0.0355437	12.2503	787	0.007182	12.2519		787	0.530389	12.2455
788	0.0355182	12.2569	788	0.007171	12.2585		788	0.540567	12.2521
789	0.0354813	12.2635	789	0.007158	12.2652		789	0.552624	12.2587
790	0.0354509	12.2702	790	0.00717	12.2718		790	0.563394	12.2654
791	0.0353961	12.277	791	0.007209	12.2787		791	0.574895	12.272
792	0.0353217	12.2837	792	0.007278	12.2853		792	0.586245	12.2787
793	0.0352528	12.2903	793	0.007368	12.2919		793	0.597087	12.2855
794	0.0352066	12.2969	794	0.007454	12.2986		794	0.608813	12.2921
795	0.0351632	12.3036	795	0.007513	12.3052		795	0.618788	12.2988
796	0.0351126	12.3102	796	0.007582	12.3118		796	0.63095	12.3054
797	0.0350629	12.3168	797	0.007632	12.3185		797	0.640727	12.312
798	0.0350129	12.3235	798	0.007707	12.3251		798	0.652325	12.3187
799	0.0349758	12.3304	799	0.007789	12.332		799	0.662409	12.3253
800	0.034927	12.337	800	0.007852	12.3386		800	0.673215	12.332
801	0.0349018	12.3436	801	0.007884	12.3453		801	0.68358	12.3388
802	0.0348907	12.3503	802	0.007916	12.3519		802	0.693658	12.3455
803	0.0348798	12.3569	803	0.007981	12.3585		803	0.704208	12.3521
804	0.0348425	12.3635	804	0.008042	12.3652		804	0.71355	12.3588
805	0.0347733	12.3702	805	0.008092	12.3718		805	0.724487	12.3654
806	0.0347162	12.3768	806	0.008131	12.3785		806	0.733236	12.372
807	0.0346782	12.3837	807	0.008149	12.3853		807	0.74377	12.3787
808	0.0346435	12.3903	808	0.008137	12.392		808	0.752674	12.3853
809	0.034598	12.3969	809	0.008147	12.3986		809	0.762412	12.3922
810	0.0345627	12.4036	810	0.008195	12.4052		810	0.771632	12.3988
811	0.0344937	12.4102	811	0.008249	12.4119		811	0.780515	12.4054
812	0.0343905	12.4169	812	0.008273	12.4185		812	0.789689	12.4121
813	0.0342769	12.4235	813	0.008267	12.4251		813	0.79765	12.4187
814	0.0341809	12.4301	814	0.008289	12.4318		814	0.806933	12.4253
815	0.0341255	12.437	815	0.008322	12.4386		815	0.814432	12.432
816	0.0340715	12.4437	816	0.008367	12.4453		816	0.823269	12.4386
817	0.0339992	12.4503	817	0.008437	12.4519		817	0.830656	12.4455
818	0.0338928	12.4569	818	0.008469	12.4586		818	0.838655	12.4521
819	0.0337959	12.4636	819	0.008445	12.4652		819	0.846108	12.4588
820	0.0337077	12.4702	820	0.008439	12.4718		820	0.853212	12.4654
821	0.0336571	12.4768	821	0.008504	12.4785		821	0.860568	12.472
822	0.0336378	12.4835	822	0.008577	12.4851		822	0.86696	12.4787
823	0.0336388	12.4903	823	0.00861	12.492		823	0.874427	12.4853
824	0.0336442	12.497	824	0.008615	12.4986		824	0.880281	12.4919
825	0.0336343	12.5036	825	0.008639	12.5052		825	0.887185	12.4988
826	0.0336194	12.5103	826	0.008651	12.5119		826	0.892867	12.5054
827	0.0336143	12.5169	827	0.008671	12.5185		827	0.899026	12.5121
828	0.0336449	12.5235	828	0.008736	12.5252		828	0.904665	12.5187
829	0.0337117	12.5302	829	0.00884	12.5318		829	0.910059	12.5254
830	0.0337945	12.5368	830	0.008929	12.5384		830	0.91557	12.532
831	0.0338968	12.5437	831	0.008955	12.5453		831	0.920398	12.5386
832	0.034033	12.5503	832	0.008978	12.5519		832	0.92584	12.5453
833	0.0341631	12.557	833	0.009037	12.5586		833	0.930104	12.5521
834	0.0344156	12.5636	834	0.009133	12.5652		834	0.935177	12.5588
835	0.0346825	12.5702	835	0.009217	12.5719		835	0.939218	12.5654
836	0.0351373	12.5769	836	0.009293	12.5785		836	0.943721	12.5721
837	0.0356127	12.5835	837	0.009359	12.5851		837	0.947636	12.5787
838	0.0362604	12.5901	838	0.009422	12.5918		838	0.951452	12.5853
839	0.0369797	12.597	839	0.009476	12.5986		839	0.955217	12.592
840	0.0378199	12.6036	840	0.009514	12.6053		840	0.958526	12.5986
841	0.0388729	12.6103	841	0.009585	12.6119		841	0.96222	12.6055
842	0.0399714	12.6169	842	0.009664	12.6186		842	0.965169	12.6121
843	0.04153	12.6235	843	0.009676	12.6252		843	0.968595	12.6187
844	0.0429684	12.6302	844	0.009647	12.6318		844	0.971264	12.6254
845	0.0450725	12.6368	845	0.009641	12.6385		845	0.974119	12.632
846	0.0470313	12.6434	846	0.009652	12.6451		846	0.976483	12.6387
847	0.0495992	12.6503	847	0.009659	12.652		847	0.978832	12.6453
848	0.052242	12.657	848	0.009657	12.6586		848	0.981109	12.6519
849	0.0552874	12.6636	849	0.009663	12.6653		849	0.983076	12.6588
850	0.0587402	12.6702	850	0.009694	12.6719		850	0.985153	12.6654
851	0.0622376	12.6769	851	0.009696	12.6785		851	0.986659	12.6721
852	0.0666381	12.6835	852	0.009707	12.6852		852	0.988491	12.6787
853	0.0705681	12.6901	853	0.009787	12.6918		853	0.989867	12.6854
854	0.0758783	12.6968	854	0.009858	12.6984		854	0.991275	12.692
855	0.080551	12.7036	855	0.009897	12.7053		855	0.992517	12.6986
856	0.0863524	12.7103	856	0.009927	12.7119		856	0.993732	12.7053
857	0.0918445	12.7169	857	0.009965	12.7186		857	0.994828	12.7121
858	0.098016	12.7236	858	0.01002	12.7252		858	0.995728	12.7188
859	0.104469	12.7302	859	0.010083	12.7318		859	0.996683	12.7254
860	0.110824	12.7368	860	0.010109	12.7385		860	0.997419	12.732
861	0.118338	12.7435	861	0.01011	12.7451		861	0.998187	12.7387
862	0.124859	12.7501	862	0.010101	12.7517		862	0.998634	12.7453
863	0.13335	12.757	863	0.010128	12.7586		863	0.999082	12.752
864	0.140542	12.7636	864	0.010176	12.7652		864	0.999457	12.7586
865	0.149255	12.7703	865	0.010221	12.7719		865	0.999755	12.7655
866	0.157398	12.7769	866	0.010259	12.7785		866	0.999922	12.7721
867	0.166342	12.7835	867	0.010299	12.7852		867	0.999993	12.7787
868	0.175582	12.7902	868	0.01034	12.7918		868	1	12.7854
869	0.184387	12.7968	869	0.010363	12.7984		869	0.999904	12.792
870	0.194929	12.8034	870	0.010419	12.8051		870	0.999661	12.7987
871	0.204033	12.8103	871	0.010501	12.8119		871	0.999369	12.8053
872	0.215343	12.8169	872	0.010562	12.8186		872	0.998978	12.8119
873	0.224982	12.8236	873	0.010581	12.8252		873	0.998512	12.8188
874	0.236247	12.8302	874	0.010602	12.8318		874	0.997921	12.8254
875	0.246843	12.8369	875	0.010642	12.8385		875	0.997153	12.8321
876	0.257968	12.8435	876	0.010692	12.8451		876	0.996432	12.8387
877	0.269658	12.8501	877	0.010755	12.8518		877	0.995549	12.8453
878	0.280679	12.8568	878	0.010807	12.8584		878	0.994715	12.852
879	0.293566	12.8636	879	0.010807	12.8653		879	0.993567	12.8586
880	0.304262	12.8703	880	0.010777	12.8719		880	0.992539	12.8652
881	0.317829	12.8769	881	0.010821	12.8786		881	0.991328	12.8721
882	0.329311	12.8836	882	0.010907	12.8852		882	0.9901	12.8788
883	0.342756	12.8902	883	0.010988	12.8918		883	0.988747	12.8854
884	0.355292	12.8968	884	0.011052	12.8985		884	0.98726	12.892
885	0.368526	12.9035	885	0.011113	12.9051		885	0.985924	12.8987
886	0.382209	12.9101	886	0.011187	12.9117		886	0.984311	12.9053
887	0.395002	12.917	887	0.011242	12.9186		887	0.982868	12.9119
888	0.409532	12.9236	888	0.01126	12.9252		888	0.981018	12.9186
889	0.421839	12.9302	889	0.01133	12.9319		889	0.979475	12.9254
890	0.4373	12.9369	890	0.011425	12.9385		890	0.977644	12.9321
891	0.449891	12.9435	891	0.011453	12.9452		891	0.975891	12.9387
892	0.464882	12.9502	892	0.011454	12.9518		892	0.974019	12.9453
893	0.478403	12.9568	893	0.011457	12.9584		893	0.972097	12.952
894	0.492929	12.9634	894	0.011457	12.9651		894	0.970273	12.9586
895	0.507291	12.9703	895	0.011425	12.9719		895	0.968096	12.9653
896	0.521149	12.9769	896	0.011377	12.9786		896	0.96622	12.9719
897	0.536291	12.9836	897	0.011375	12.9852		897	0.963849	12.9788
898	0.549404	12.9902	898	0.011409	12.9918		898	0.961884	12.9854
899	0.565553	12.9968	899	0.011455	12.9985		899	0.959419	12.9921
900	0.578548	13.0035	900	0.011477	13.0051		900	0.957109	12.9987
901	0.594421	13.0101	901	0.01148	13.0117		901	0.95464	13.0053
902	0.608241	13.0168	902	0.011481	13.0184		902	0.952096	13.012
903	0.623249	13.0236	903	0.011506	13.0252		903	0.949664	13.0186
904	0.637479	13.0303	904	0.01158	13.0319		904	0.946967	13.0252
905	0.651541	13.0369	905	0.011677	13.0385		905	0.944688	13.0321
906	0.666249	13.0435	906	0.011761	13.0452		906	0.941782	13.0387
907	0.679422	13.0502	907	0.011801	13.0518		907	0.939345	13.0454
908	0.694546	13.0568	908	0.011818	13.0585		908	0.936477	13.052
909	0.706634	13.0634	909	0.011818	13.0651		909	0.933853	13.0587
910	0.721366	13.0701	910	0.011825	13.0717		910	0.931089	13.0653
911	0.733452	13.0769	911	0.01185	13.0786		911	0.928193	13.0719
912	0.746753	13.0836	912	0.011901	13.0852		912	0.925493	13.0785
913	0.759019	13.0902	913	0.011963	13.0919		913	0.922345	13.0854
914	0.771272	13.0969	914	0.011982	13.0985		914	0.91961	13.0921
915	0.783668	13.1035	915	0.011963	13.1052		915	0.916167	13.0987
916	0.794729	13.1101	916	0.011953	13.1118		916	0.913324	13.1053
917	0.806999	13.1168	917	0.011951	13.1184		917	0.910007	13.112
918	0.817055	13.1234	918	0.011976	13.1251		918	0.906908	13.1186
919	0.829006	13.1303	919	0.012015	13.1319		919	0.903762	13.1252
920	0.838391	13.1369	920	0.012054	13.1386		920	0.900519	13.1319
921	0.848807	13.1435	921	0.012093	13.1452		921	0.897512	13.1387
922	0.85803	13.1502	922	0.012133	13.1518		922	0.893985	13.1454
923	0.867087	13.1568	923	0.012145	13.1585		923	0.891023	13.152
924	0.875983	13.1635	924	0.012181	13.1651		924	0.887322	13.1587
925	0.88386	13.1701	925	0.012256	13.1717		925	0.884298	13.1653
926	0.892533	13.1767	926	0.01232	13.1784		926	0.880711	13.172
927	0.899492	13.1836	927	0.012372	13.1852		927	0.877416	13.1786
928	0.907621	13.1903	928	0.012416	13.1919		928	0.873936	13.1852
929	0.913854	13.1969	929	0.012445	13.1985		929	0.870334	13.1921
930	0.920826	13.2035	930	0.012464	13.2051		930	0.866936	13.1987
931	0.926766	13.2102	931	0.012472	13.2118		931	0.863107	13.2054
932	0.932701	13.2168	932	0.012464	13.2184		932	0.859907	13.212
933	0.938302	13.2234	933	0.012464	13.2251		933	0.855869	13.2186
934	0.943313	13.2301	934	0.012442	13.2317		934	0.852569	13.2253
935	0.948609	13.2369	935	0.012423	13.2386		935	0.848661	13.2319
936	0.952766	13.2436	936	0.012416	13.2452		936	0.84512	13.2386
937	0.95755	13.2502	937	0.012428	13.2518		937	0.841387	13.2454
938	0.961163	13.2569	938	0.012457	13.2585		938	0.837621	13.2521
939	0.965209	13.2635	939	0.012511	13.2651		939	0.834066	13.2587
940	0.968521	13.2701	940	0.012604	13.2718		940	0.830069	13.2653
941	0.971961	13.2768	941	0.012699	13.2784		941	0.826662	13.272
942	0.975177	13.2834	942	0.012775	13.285		942	0.82238	13.2786
943	0.978083	13.2903	943	0.012843	13.2919		943	0.818937	13.2852
944	0.980958	13.2969	944	0.012903	13.2986		944	0.814828	13.2919
945	0.98322	13.3036	945	0.012959	13.3052		945	0.811191	13.2987
946	0.985774	13.3102	946	0.013027	13.3118		946	0.807255	13.3054
947	0.987652	13.3168	947	0.013087	13.3185		947	0.80334	13.312
948	0.989674	13.3235	948	0.013157	13.3251		948	0.799532	13.3187
949	0.991278	13.3301	949	0.013236	13.3317		949	0.795368	13.3253
950	0.992892	13.3367	950	0.013268	13.3384		950	0.791706	13.3319
951	0.994187	13.3436	951	0.013265	13.3452		951	0.787251	13.3386
952	0.995291	13.3502	952	0.013279	13.3519		952	0.783672	13.3452
953	0.996332	13.3569	953	0.013298	13.3585		953	0.77933	13.3521
954	0.997169	13.3635	954	0.013324	13.3651		954	0.775551	13.3587
955	0.998019	13.3701	955	0.013382	13.3718		955	0.77137	13.3653
956	0.998535	13.3768	956	0.013442	13.3784		956	0.767363	13.372
957	0.998984	13.3834	957	0.013491	13.3851		957	0.763376	13.3786
958	0.99929	13.39	958	0.013517	13.3917		958	0.75913	13.3852
959	0.999624	13.3969	959	0.013513	13.3986		959	0.755366	13.3919
960	0.99988	13.4036	960	0.013515	13.4052		960	0.750875	13.3985
961	1	13.4102	961	0.013553	13.4118		961	0.747194	13.4054
962	0.999962	13.4168	962	0.013623	13.4185		962	0.742758	13.412
963	0.999838	13.4235	963	0.013688	13.4251		963	0.738981	13.4187
964	0.999655	13.4301	964	0.013778	13.4317		964	0.734657	13.4253
965	0.999414	13.4367	965	0.013842	13.4384		965	0.730537	13.432
966	0.998915	13.4434	966	0.01388	13.445		966	0.726453	13.4386
967	0.998473	13.4502	967	0.013909	13.4519		967	0.722121	13.4452
968	0.997895	13.4569	968	0.01394	13.4585		968	0.718302	13.4519
969	0.997228	13.4635	969	0.013971	13.4652		969	0.713735	13.4587
970	0.996388	13.4702	970	0.014009	13.4718		970	0.710028	13.4654
971	0.995458	13.4768	971	0.014109	13.4784		971	0.705515	13.472
972	0.994558	13.4834	972	0.014176	13.4851		972	0.701556	13.4786
973	0.99336	13.4901	973	0.014211	13.4917		973	0.697172	13.4853
974	0.9922	13.4967	974	0.014214	13.4983		974	0.693055	13.4919
975	0.990798	13.5036	975	0.014252	13.5052		975	0.688988	13.4986
976	0.989613	13.5102	976	0.014335	13.5119		976	0.684563	13.5052
977	0.988207	13.5169	977	0.014411	13.5185		977	0.68067	13.5121
978	0.986793	13.5235	978	0.014444	13.5251		978	0.675992	13.5187
979	0.985294	13.5301	979	0.014484	13.5318		979	0.672156	13.5253
980	0.983719	13.5368	980	0.014577	13.5384		980	0.667477	13.532
981	0.982267	13.5434	981	0.014609	13.545		981	0.663488	13.5386
982	0.980488	13.55	982	0.014661	13.5517		982	0.659091	13.5452
983	0.979017	13.5569	983	0.01475	13.5585		983	0.65491	13.5519
984	0.977195	13.5635	984	0.014834	13.5652		984	0.65066	13.5585
985	0.975559	13.5702	985	0.014869	13.5718		985	0.646193	13.5654
986	0.973704	13.5768	986	0.014865	13.5785		986	0.642212	13.572
987	0.971892	13.5834	987	0.014863	13.5851		987	0.637648	13.5787
988	0.97009	13.5901	988	0.014907	13.5917		988	0.633941	13.5853
989	0.968136	13.5967	989	0.01496	13.5984		989	0.629284	13.5919
990	0.966387	13.6034	990	0.014956	13.605		990	0.625452	13.5986
991	0.964235	13.6102	991	0.015002	13.6119		991	0.621061	13.6052
992	0.962468	13.6169	992	0.015036	13.6185		992	0.617067	13.6118
993	0.960204	13.6235	993	0.015067	13.6252		993	0.61288	13.6187
994	0.95821	13.6301	994	0.01511	13.6318		994	0.608679	13.6253
995	0.95595	13.6368	995	0.015172	13.6384		995	0.604806	13.632
996	0.953751	13.6434	996	0.015262	13.6451		996	0.600398	13.6386
997	0.951571	13.65	997	0.015365	13.6517		997	0.596648	13.6453
998	0.949166	13.6567	998	0.015463	13.6583		998	0.591937	13.6519
999	0.946996	13.6636	999	0.015548	13.6652		999	0.588155	13.6585
1000	0.944299	13.6702	1000	0.015641	13.6718		1000	0.583685	13.6652
1001	0.942067	13.6768	1001	0.015686	13.6785		1001	0.579663	13.672
1002	0.939333	13.6835	1002	0.015744	13.6851		1002	0.575368	13.6787
1003	0.93697	13.6901	1003	0.015812	13.6918		1003	0.57113	13.6853
1004	0.934421	13.6968	1004	0.015905	13.6984		1004	0.567114	13.6919
1005	0.931984	13.7034	1005	0.016022	13.705		1005	0.562669	13.6986
1006	0.929495	13.71	1006	0.016113	13.7117		1006	0.558944	13.7052
1007	0.926731	13.7169	1007	0.016175	13.7185		1007	0.554276	13.7119
1008	0.924218	13.7235	1008	0.01624	13.7252		1008	0.550568	13.7185
1009	0.921188	13.7302	1009	0.016323	13.7318		1009	0.546245	13.7254
1010	0.918716	13.7368	1010	0.016398	13.7384		1010	0.542359	13.732
1011	0.915661	13.7435	1011	0.016525	13.7451		1011	0.538294	13.7386
1012	0.913072	13.7501	1012	0.016651	13.7517		1012	0.534202	13.7453
1013	0.910148	13.7567	1013	0.016773	13.7584		1013	0.530363	13.7519
1014	0.907313	13.7634	1014	0.016877	13.765		1014	0.526078	13.7586
1015	0.904334	13.7702	1015	0.016949	13.7719		1015	0.522424	13.7652
1016	0.901219	13.7769	1016	0.017035	13.7785		1016	0.517898	13.7718
1017	0.89837	13.7835	1017	0.017152	13.7851		1017	0.514317	13.7787
1018	0.894999	13.7901	1018	0.017304	13.7918		1018	0.510041	13.7853
1019	0.892194	13.7968	1019	0.01744	13.7984		1019	0.506181	13.792
1020	0.888739	13.8034	1020	0.017615	13.805		1020	0.502189	13.7986
1021	0.885867	13.81	1021	0.017756	13.8117		1021	0.498163	13.8052
1022	0.882459	13.8167	1022	0.017888	13.8183		1022	0.494453	13.8119
1023	0.879265	13.8235	1023	0.01803	13.8252		1023	0.49031	13.8185
1024	0.875931	13.8302	1024	0.018179	13.8318		1024	0.486859	13.8252
1025	0.872383	13.8368	1025	0.018383	13.8385		1025	0.482499	13.832
1026	0.869139	13.8435	1026	0.018578	13.8451		1026	0.479011	13.8387
1027	0.865482	13.8501	1027	0.018807	13.8517		1027	0.474923	13.8453
1028	0.862455	13.8567	1028	0.019003	13.8584		1028	0.47136	13.8519
1029	0.858806	13.8634	1029	0.019222	13.865		1029	0.467572	13.8586
1030	0.855611	13.87	1030	0.019417	13.8717		1030	0.463708	13.8652
1031	0.851967	13.8769	1031	0.019613	13.8785		1031	0.460141	13.8719
1032	0.848515	13.8835	1032	0.019839	13.8851		1032	0.456135	13.8785
1033	0.845037	13.8901	1033	0.020063	13.8918		1033	0.452756	13.8854
1034	0.8413	13.8968	1034	0.020368	13.8984		1034	0.448618	13.892
1035	0.838055	13.9034	1035	0.020616	13.9051		1035	0.44534	13.8986
1036	0.834207	13.9101	1036	0.020922	13.9117		1036	0.441506	13.9053
1037	0.830951	13.9167	1037	0.0212	13.9183		1037	0.438035	13.9119
1038	0.826954	13.9233	1038	0.021554	13.925		1038	0.434403	13.9185
1039	0.823436	13.9302	1039	0.021917	13.9318		1039	0.430794	13.9252
1040	0.819615	13.9369	1040	0.022286	13.9385		1040	0.427514	13.9318
1041	0.815909	13.9435	1041	0.022665	13.9451		1041	0.423774	13.9387
1042	0.812232	13.9501	1042	0.02303	13.9518		1042	0.42067	13.9453
1043	0.808297	13.9568	1043	0.023511	13.9584		1043	0.416841	13.952
1044	0.804785	13.9634	1044	0.023897	13.965		1044	0.413756	13.9586
1045	0.80073	13.97	1045	0.0244	13.9717		1045	0.410177	13.9652
1046	0.797357	13.9767	1046	0.024858	13.9783		1046	0.406921	13.9719
1047	0.793052	13.9835	1047	0.025427	13.9852		1047	0.403595	13.9785
1048	0.789487	13.9902	1048	0.025965	13.9918		1048	0.400207	13.9852
1049	0.785427	13.9968	1049	0.026518	13.9984		1049	0.397098	13.992
1050	0.781665	14.0034	1050	0.027109	14.0051		1050	0.393573	13.9986
1051	0.777798	14.0101	1051	0.027727	14.0117		1051	0.390648	14.0053
1052	0.77381	14.0167	1052	0.028506	14.0184		1052	0.38707	14.0119
1053	0.770136	14.0234	1053	0.029157	14.025		1053	0.384161	14.0185
1054	0.765936	14.03	1054	0.029966	14.0316		1054	0.380834	14.0252
1055	0.762355	14.0369	1055	0.030656	14.0385		1055	0.377828	14.0318
1056	0.757879	14.0435	1056	0.03152	14.0451		1056	0.374778	14.0385
1057	0.7543	14.0501	1057	0.032311	14.0518		1057	0.371623	14.0453
1058	0.75002	14.0568	1058	0.03318	14.0584		1058	0.368757	14.052
1059	0.746105	14.0634	1059	0.034109	14.0651		1059	0.365491	14.0586
1060	0.74195	14.0701	1060	0.035072	14.0717		1060	0.362791	14.0653
1061	0.737791	14.0767	1061	0.036195	14.0783		1061	0.359534	14.0719
1062	0.733888	14.0833	1062	0.037138	14.085		1062	0.356881	14.0785
1063	0.72951	14.0902	1063	0.038411	14.0918		1063	0.353844	14.0852
1064	0.725815	14.0968	1064	0.039527	14.0985		1064	0.35105	14.0918
1065	0.721197	14.1035	1065	0.040965	14.1051		1065	0.348188	14.0987
1066	0.717436	14.1101	1066	0.042308	14.1117		1066	0.345286	14.1053
1067	0.713017	14.1167	1067	0.043801	14.1184		1067	0.342664	14.1119
1068	0.70908	14.1234	1068	0.045358	14.125		1068	0.339767	14.1186
1069	0.704908	14.13	1069	0.046925	14.1317		1069	0.337401	14.1252
1070	0.700709	14.1366	1070	0.048704	14.1383		1070	0.334511	14.1319
1071	0.696706	14.1435	1071	0.050302	14.1451		1071	0.332178	14.1385
1072	0.692222	14.1502	1072	0.052338	14.1518		1072	0.329501	14.1451
1073	0.688428	14.1568	1073	0.054043	14.1584		1073	0.327113	14.152
1074	0.683642	14.1634	1074	0.056195	14.1651		1074	0.324645	14.1586
1075	0.679759	14.1701	1075	0.058096	14.1717		1075	0.32222	14.1653
1076	0.675259	14.1767	1076	0.060267	14.1784		1076	0.319963	14.1719
1077	0.671224	14.1833	1077	0.062466	14.185		1077	0.317496	14.1785
1078	0.666937	14.19	1078	0.06473	14.1916		1078	0.31539	14.1852
1079	0.662685	14.1968	1079	0.067261	14.1985		1079	0.312856	14.1918
1080	0.658677	14.2035	1080	0.069559	14.2051		1080	0.310847	14.1985
1081	0.654202	14.2101	1081	0.072346	14.2118		1081	0.308475	14.2053
1082	0.650406	14.2167	1082	0.074688	14.2184		1082	0.306406	14.212
1083	0.645657	14.2234	1083	0.077748	14.225		1083	0.304255	14.2186
1084	0.641901	14.23	1084	0.080478	14.2317		1084	0.302202	14.2252
1085	0.63751	14.2367	1085	0.08362	14.2383		1085	0.300246	14.2319
1086	0.633493	14.2433	1086	0.086725	14.2449		1086	0.298143	14.2385
1087	0.629227	14.2502	1087	0.089924	14.2518		1087	0.296335	14.2452
1088	0.624872	14.2568	1088	0.093426	14.2584		1088	0.294255	14.2518
1089	0.620803	14.2635	1089	0.096636	14.2651		1089	0.292613	14.2587
1090	0.616304	14.2701	1090	0.100604	14.2717		1090	0.290662	14.2653
1091	0.612519	14.2767	1091	0.104044	14.2784		1091	0.289005	14.2719
1092	0.607843	14.2834	1092	0.108314	14.285		1092	0.287233	14.2786
1093	0.604063	14.29	1093	0.112001	14.2916		1093	0.285533	14.2852
1094	0.59964	14.2966	1094	0.116254	14.2983		1094	0.283904	14.2918
1095	0.595541	14.3035	1095	0.120375	14.3051		1095	0.282213	14.2985
1096	0.591358	14.3101	1096	0.124642	14.3118		1096	0.280788	14.3051
1097	0.587059	14.3168	1097	0.129245	14.3184		1097	0.279158	14.312
1098	0.583207	14.3234	1098	0.133509	14.325		1098	0.277819	14.3186
1099	0.578698	14.3301	1099	0.13869	14.3317		1099	0.276254	14.3253
1100	0.574844	14.3367	1100	0.14304	14.3383		1100	0.274962	14.3319
1101	0.570208	14.3433	1101	0.148582	14.345		1101	0.273569	14.3385
1102	0.566375	14.35	1102	0.153399	14.3516		1102	0.272269	14.3452
1103	0.562057	14.3568	1103	0.15902	14.3584		1103	0.271047	14.3518
1104	0.557987	14.3635	1104	0.164325	14.3651		1104	0.269778	14.3584
1105	0.553957	14.3701	1105	0.169909	14.3718		1105	0.268692	14.3653
1106	0.549673	14.3767	1106	0.175762	14.3784		1106	0.267448	14.3719
1107	0.54591	14.3834	1107	0.181361	14.385		1107	0.266456	14.3786
1108	0.541435	14.39	1108	0.187861	14.3917		1108	0.265288	14.3852
1109	0.537801	14.3967	1109	0.193351	14.3983		1109	0.264325	14.3918
1110	0.533366	14.4033	1110	0.200359	14.4049		1110	0.263283	14.3985
1111	0.529603	14.4102	1111	0.206175	14.4118		1111	0.262361	14.4051
1112	0.525383	14.4168	1112	0.213157	14.4184		1112	0.26147	14.4118
1113	0.521362	14.4234	1113	0.219599	14.4251		1113	0.260581	14.4186
1114	0.517401	14.4301	1114	0.226407	14.4317		1114	0.259796	14.4253
1115	0.513188	14.4367	1115	0.233375	14.4383		1115	0.25893	14.4319
1116	0.50951	14.4434	1116	0.240106	14.445		1116	0.258247	14.4385
1117	0.50514	14.45	1117	0.247736	14.4516		1117	0.257481	14.4452
1118	0.501599	14.4566	1118	0.254311	14.4582		1118	0.256891	14.4518
1119	0.497273	14.4635	1119	0.262538	14.4651		1119	0.256239	14.4585
1120	0.493661	14.4701	1120	0.269247	14.4718		1120	0.255673	14.4651
1121	0.489539	14.4768	1121	0.277475	14.4784		1121	0.255117	14.472
1122	0.485688	14.4834	1122	0.284766	14.485		1122	0.254599	14.4786
1123	0.481811	14.49	1123	0.292752	14.4917		1123	0.254151	14.4853
1124	0.477707	14.4967	1124	0.300738	14.4983		1124	0.253705	14.4919
1125	0.474032	14.5033	1125	0.308614	14.5049		1125	0.25337	14.4985
1126	0.469738	14.51	1126	0.317309	14.5116		1126	0.253027	14.5052
1127	0.466207	14.5168	1127	0.324935	14.5184		1127	0.252766	14.5118
1128	0.461855	14.5235	1128	0.33413	14.5251		1128	0.252468	14.5184
1129	0.458216	14.5301	1129	0.341674	14.5317		1129	0.252237	14.5253
1130	0.454126	14.5367	1130	0.350979	14.5384		1130	0.252047	14.5319
1131	0.450425	14.5434	1131	0.359004	14.545		1131	0.251909	14.5386
1132	0.446621	14.55	1132	0.367848	14.5516		1132	0.25181	14.5452
1133	0.442762	14.5566	1133	0.376429	14.5583		1133	0.251708	14.5518
1134	0.439221	14.5633	1134	0.38502	14.5649		1134	0.251648	14.5585
1135	0.43518	14.5701	1135	0.394249	14.5717		1135	0.251635	14.5651
1136	0.43178	14.5768	1136	0.402368	14.5784		1136	0.251636	14.5717
1137	0.42767	14.5834	1137	0.41219	14.5851		1137	0.251665	14.5786
1138	0.42438	14.5901	1138	0.420374	14.5917		1138	0.251745	14.5853
1139	0.420468	14.5967	1139	0.430286	14.5983		1139	0.251845	14.5919
1140	0.416941	14.6033	1140	0.438718	14.605		1140	0.251944	14.5985
1141	0.413178	14.61	1141	0.448251	14.6116		1141	0.25204	14.6052
1142	0.409499	14.6166	1142	0.457389	14.6182		1142	0.252212	14.6118
1143	0.405963	14.6235	1143	0.46657	14.6251		1143	0.252397	14.6184
1144	0.402157	14.6301	1144	0.476327	14.6318		1144	0.252623	14.6251
1145	0.398873	14.6367	1145	0.485081	14.6384		1145	0.252807	14.6319
1146	0.394973	14.6434	1146	0.49527	14.645		1146	0.253023	14.6386
1147	0.391783	14.65	1147	0.503534	14.6517		1147	0.25323	14.6452
1148	0.387936	14.6567	1148	0.513558	14.6583		1148	0.253466	14.6518
1149	0.384677	14.6633	1149	0.522242	14.6649		1149	0.253765	14.6585
1150	0.381092	14.6699	1150	0.531768	14.6716		1150	0.254072	14.6651
1151	0.377705	14.6768	1151	0.54099	14.6784		1151	0.254496	14.6718
1152	0.374278	14.6834	1152	0.550051	14.6851		1152	0.25485	14.6784
1153	0.370691	14.6901	1153	0.55962	14.6917		1153	0.255257	14.6853
1154	0.367497	14.6967	1154	0.567994	14.6983		1154	0.255629	14.6919
1155	0.363787	14.7034	1155	0.577956	14.705		1155	0.256046	14.6986
1156	0.360755	14.71	1156	0.586268	14.7116		1156	0.256454	14.7052
1157	0.357022	14.7166	1157	0.596302	14.7183		1157	0.256899	14.7118
1158	0.353886	14.7233	1158	0.605061	14.7249		1158	0.257364	14.7185
1159	0.350401	14.7301	1159	0.614487	14.7317		1159	0.25777	14.7251
1160	0.347179	14.7368	1160	0.623615	14.7384		1160	0.258206	14.7317
1161	0.343895	14.7434	1161	0.63223	14.745		1161	0.258515	14.7386
1162	0.340573	14.75	1162	0.641741	14.7517		1162	0.258975	14.7452
1163	0.337569	14.7567	1163	0.649939	14.7583		1163	0.259387	14.7519
1164	0.334099	14.7633	1164	0.65979	14.765		1164	0.259879	14.7585
1165	0.331238	14.77	1165	0.667739	14.7716		1165	0.26036	14.7652
1166	0.327752	14.7766	1166	0.677118	14.7782		1166	0.260854	14.7718
1167	0.324898	14.7835	1167	0.685227	14.785		1167	0.261338	14.7784
1168	0.321679	14.7901	1168	0.693813	14.7917		1168	0.261779	14.7851
1169	0.318675	14.7967	1169	0.702236	14.7984		1169	0.262277	14.7919
1170	0.315643	14.8034	1170	0.710378	14.805		1170	0.262728	14.7986
1171	0.312511	14.81	1171	0.71916	14.8117		1171	0.263286	14.8052
1172	0.309695	14.8167	1172	0.726655	14.8183		1172	0.263698	14.8118
1173	0.306353	14.8233	1173	0.735566	14.8249		1173	0.264157	14.8185
1174	0.303594	14.8299	1174	0.742703	14.8316		1174	0.264565	14.8251
1175	0.300293	14.8368	1175	0.751279	14.8383		1175	0.264984	14.8318
1176	0.297529	14.8434	1176	0.75862	14.8451		1176	0.265448	14.8384
1177	0.294438	14.8501	1177	0.766555	14.8517		1177	0.265883	14.8453
1178	0.291551	14.8567	1178	0.774019	14.8583		1178	0.266381	14.8519
1179	0.288666	14.8633	1179	0.781284	14.865		1179	0.266811	14.8585
1180	0.285666	14.87	1180	0.788954	14.8716		1180	0.267338	14.8652
1181	0.283008	14.8766	1181	0.795681	14.8782		1181	0.267766	14.8718
1182	0.279872	14.8832	1182	0.803359	14.8849		1182	0.268256	14.8785
1183	0.277389	14.8901	1183	0.809547	14.8917		1183	0.268718	14.8851
1184	0.274324	14.8967	1184	0.817137	14.8984		1184	0.269173	14.8917
1185	0.27175	14.9034	1185	0.823444	14.905		1185	0.269609	14.8986
1186	0.268814	14.91	1186	0.830432	14.9117		1186	0.269984	14.9052
1187	0.26608	14.9167	1187	0.836912	14.9183		1187	0.270433	14.9119
1188	0.263311	14.9233	1188	0.843332	14.925		1188	0.2708	14.9185
1189	0.260452	14.9299	1189	0.849765	14.9316		1189	0.271259	14.9252
1190	0.25784	14.9366	1190	0.855388	14.9382		1190	0.271623	14.9318
1191	0.254818	14.9434	1191	0.861827	14.945		1191	0.272045	14.9384
1192	0.252347	14.9501	1192	0.867111	14.9517		1192	0.272432	14.9451
1193	0.249395	14.9567	1193	0.873485	14.9583		1193	0.272821	14.9519
1194	0.246958	14.9633	1194	0.878607	14.965		1194	0.273218	14.9586
1195	0.244196	14.97	1195	0.884153	14.9716		1195	0.273591	14.9652
1196	0.241653	14.9766	1196	0.889276	14.9783		1196	0.273977	14.9718
1197	0.23909	14.9833	1197	0.894257	14.9849		1197	0.274271	14.9785
1198	0.236437	14.9899	1198	0.899506	14.9915		1198	0.274617	14.9851
1199	0.234068	14.9968	1199	0.904128	14.9983		1199	0.274878	14.9917
1200	0.231309	15.0034	1200	0.909483	15.005		1200	0.27514	14.9984
1201	0.229049	15.0101	1201	0.913803	15.0117		1201	0.27534	15.0053
1202	0.226319	15.0167	1202	0.91887	15.0183		1202	0.275522	15.0119
1203	0.223967	15.0233	1203	0.922949	15.025		1203	0.275702	15.0185
1204	0.221371	15.03	1204	0.92735	15.0316		1204	0.275848	15.0252
1205	0.218925	15.0366	1205	0.931438	15.0382		1205	0.275997	15.0318
1206	0.216537	15.0432	1206	0.935343	15.0449		1206	0.276112	15.0384
1207	0.214026	15.0501	1207	0.939301	15.0516		1207	0.276264	15.0451
1208	0.211812	15.0567	1208	0.942645	15.0584		1208	0.276367	15.0517
1209	0.209172	15.0634	1209	0.946549	15.065		1209	0.276464	15.0586
1210	0.207031	15.07	1210	0.949579	15.0716		1210	0.276554	15.0652
1211	0.20448	15.0767	1211	0.953242	15.0783		1211	0.276636	15.0719
1212	0.202309	15.0833	1212	0.956242	15.0849		1212	0.276696	15.0785
1213	0.199971	15.0899	1213	0.959505	15.0916		1213	0.276728	15.0851
1214	0.197714	15.0965	1214	0.962502	15.0982		1214	0.276746	15.0917
1215	0.195528	15.1034	1215	0.965464	15.1049		1215	0.276753	15.0984
1216	0.193188	15.1101	1216	0.968497	15.1117		1216	0.276766	15.105
1217	0.191129	15.1167	1217	0.971158	15.1183		1217	0.276743	15.1119
1218	0.188713	15.1233	1218	0.974031	15.125		1218	0.276693	15.1185
1219	0.186767	15.13	1219	0.976267	15.1316		1219	0.276631	15.1252
1220	0.184401	15.1366	1220	0.978863	15.1383		1220	0.276557	15.1318
1221	0.182388	15.1432	1221	0.980857	15.1449		1221	0.276462	15.1385
1222	0.180168	15.1499	1222	0.982954	15.1515		1222	0.276373	15.1451
1223	0.17802	15.1567	1223	0.984791	15.1583		1223	0.27625	15.1517
1224	0.175922	15.1634	1224	0.98652	15.165		1224	0.27614	15.1584
1225	0.173684	15.17	1225	0.988143	15.1717		1225	0.275996	15.1652
1226	0.171716	15.1767	1226	0.989477	15.1783		1226	0.275841	15.1719
1227	0.169463	15.1833	1227	0.990983	15.1849		1227	0.275617	15.1785
1228	0.167618	15.1899	1228	0.99219	15.1916		1228	0.275375	15.1851
1229	0.165403	15.1966	1229	0.993574	15.1982		1229	0.275116	15.1918
1230	0.16356	15.2032	1230	0.994615	15.2049		1230	0.274826	15.1984
1231	0.161522	15.2101	1231	0.995667	15.2116		1231	0.274555	15.2051
1232	0.159641	15.2167	1232	0.99655	15.2184		1232	0.274237	15.2117
1233	0.157814	15.2234	1233	0.997367	15.225		1233	0.273955	15.2186
1234	0.155864	15.23	1234	0.998137	15.2317		1234	0.273607	15.2252
1235	0.154159	15.2366	1235	0.998782	15.2383		1235	0.273285	15.2318
1236	0.152151	15.2433	1236	0.999366	15.2449		1236	0.272894	15.2385
1237	0.150484	15.2499	1237	0.999701	15.2515		1237	0.272526	15.2451
1238	0.148434	15.2565	1238	0.999937	15.2582		1238	0.272168	15.2518
1239	0.14672	15.2634	1239	0.999996	15.2649		1239	0.271795	15.2584
1240	0.144819	15.2701	1240	1	15.2717		1240	0.271446	15.265
1241	0.143059	15.2767	1241	0.999952	15.2783		1241	0.271001	15.2719
1242	0.141277	15.2833	1242	0.999777	15.285		1242	0.270607	15.2785
1243	0.13943	15.29	1243	0.999473	15.2916		1243	0.270109	15.2852
1244	0.137808	15.2966	1244	0.999076	15.2982		1244	0.269658	15.2918
1245	0.135952	15.3032	1245	0.998598	15.3049		1245	0.269129	15.2984
1246	0.134454	15.3099	1246	0.998095	15.3115		1246	0.268615	15.3051
1247	0.132586	15.3167	1247	0.997298	15.3182		1247	0.268118	15.3117
1248	0.131093	15.3234	1248	0.9966	15.325		1248	0.267595	15.3183
1249	0.129387	15.33	1249	0.995647	15.3317		1249	0.267093	15.3252
1250	0.127812	15.3366	1250	0.994678	15.3383		1250	0.26643	15.3319
1251	0.126188	15.3433	1251	0.993592	15.3449		1251	0.265873	15.3385
1252	0.124486	15.3499	1252	0.992533	15.3516		1252	0.265189	15.3451
1253	0.122946	15.3566	1253	0.991422	15.3582		1253	0.264584	15.3518
1254	0.121203	15.3632	1254	0.990141	15.3648		1254	0.263879	15.3584
1255	0.119742	15.3701	1255	0.988848	15.3715		1255	0.263174	15.365
1256	0.11802	15.3767	1256	0.987164	15.3783		1256	0.26247	15.3717
1257	0.116641	15.3833	1257	0.985774	15.385		1257	0.261676	15.3785
1258	0.115064	15.39	1258	0.983771	15.3916		1258	0.260924	15.3852
1259	0.113629	15.3966	1259	0.981997	15.3983		1259	0.26009	15.3918
1260	0.112163	15.4033	1260	0.980016	15.4049		1260	0.259436	15.3985
1261	0.110635	15.4099	1261	0.97808	15.4115		1261	0.258611	15.4051
1262	0.109311	15.4165	1262	0.975965	15.4182		1262	0.257884	15.4117
1263	0.107766	15.4234	1263	0.973737	15.4248		1263	0.257079	15.4184
1264	0.106504	15.43	1264	0.971546	15.4317		1264	0.256337	15.425
1265	0.104984	15.4367	1265	0.968995	15.4383		1265	0.255585	15.4319
1266	0.103697	15.4433	1266	0.966841	15.4449		1266	0.254765	15.4385
1267	0.102253	15.45	1267	0.964091	15.4516		1267	0.254032	15.4452
1268	0.100899	15.4566	1268	0.961955	15.4582		1268	0.253157	15.4518
1269	0.0995366	15.4632	1269	0.959364	15.4649		1269	0.252389	15.4584
1270	0.0981083	15.4699	1270	0.956931	15.4715		1270	0.251421	15.4651
1271	0.0968595	15.4767	1271	0.954234	15.4782		1271	0.250608	15.4717
1272	0.0953835	15.4834	1272	0.951498	15.485		1272	0.249713	15.4784
1273	0.0941744	15.49	1273	0.948811	15.4916		1273	0.248863	15.4852
1274	0.0927496	15.4966	1274	0.94582	15.4983		1274	0.247971	15.4918
1275	0.0915594	15.5033	1275	0.943237	15.5049		1275	0.247024	15.4985
1276	0.0902215	15.5099	1276	0.939951	15.5115		1276	0.246172	15.5051
1277	0.0889699	15.5166	1277	0.937262	15.5182		1277	0.245197	15.5118
1278	0.0877334	15.5232	1278	0.933952	15.5248		1278	0.244376	15.5184
1279	0.0864745	15.5301	1279	0.930985	15.5315		1279	0.243327	15.525
1280	0.0853672	15.5367	1280	0.927631	15.5383		1280	0.242462	15.5317
1281	0.0841005	15.5433	1281	0.924321	15.545		1281	0.241467	15.5385
1282	0.0830975	15.55	1282	0.920996	15.5516		1282	0.240524	15.5452
1283	0.0818684	15.5566	1283	0.917321	15.5582		1283	0.239529	15.5518
1284	0.0808455	15.5632	1284	0.91408	15.5649		1284	0.238509	15.5584
1285	0.0796797	15.5699	1285	0.910142	15.5715		1285	0.237595	15.5651
1286	0.0785963	15.5765	1286	0.906932	15.5782		1286	0.236535	15.5717
1287	0.0775151	15.5834	1287	0.903055	15.5848		1287	0.235632	15.5784
1288	0.0763985	15.59	1288	0.899652	15.5917		1288	0.234491	15.585
1289	0.0753742	15.5967	1289	0.895844	15.5983		1289	0.233575	15.5919
1290	0.0742253	15.6033	1290	0.892105	15.6049		1290	0.232478	15.5985
1291	0.0732787	15.6099	1291	0.888376	15.6116		1291	0.231473	15.6051
1292	0.0721078	15.6166	1292	0.884339	15.6182		1292	0.23038	15.6118
1293	0.0711538	15.6232	1293	0.880791	15.6249		1293	0.229288	15.6184
1294	0.0700627	15.6298	1294	0.876257	15.6315		1294	0.228234	15.625
1295	0.0690923	15.6367	1295	0.872467	15.6382		1295	0.227051	15.6317
1296	0.0681056	15.6433	1296	0.867943	15.645		1296	0.226023	15.6383
1297	0.067114	15.65	1297	0.86388	15.6516		1297	0.224794	15.6452
1298	0.0661897	15.6566	1298	0.859429	15.6583		1298	0.223803	15.6518
1299	0.0651531	15.6633	1299	0.855065	15.6649		1299	0.222586	15.6585
1300	0.0642756	15.6699	1300	0.850822	15.6715		1300	0.221514	15.6651
1301	0.0632128	15.6765	1301	0.846162	15.6782		1301	0.220365	15.6717
1302	0.0623741	15.6832	1302	0.842038	15.6848		1302	0.21925	15.6784
1303	0.0613831	15.69	1303	0.837015	15.6915		1303	0.218148	15.685
1304	0.0605165	15.6967	1304	0.833026	15.6983		1304	0.216936	15.6917
1305	0.0595789	15.7033	1305	0.82813	15.705		1305	0.215885	15.6985
1306	0.0586857	15.7099	1306	0.823768	15.7116		1306	0.214581	15.7052
1307	0.0578306	15.7166	1307	0.81906	15.7182		1307	0.213476	15.7118
1308	0.0569383	15.7232	1308	0.814516	15.7248		1308	0.212175	15.7184
1309	0.0561909	15.7299	1309	0.810105	15.7315		1309	0.211055	15.7251
1310	0.0552827	15.7365	1310	0.805247	15.7381		1310	0.209857	15.7317
1311	0.05456	15.7434	1311	0.801034	15.7448		1311	0.208689	15.7384
1312	0.0537115	15.75	1312	0.795903	15.7516		1312	0.207557	15.745
1313	0.0530007	15.7567	1313	0.791737	15.7583		1313	0.206303	15.7518
1314	0.0522313	15.7633	1314	0.786642	15.7649		1314	0.205247	15.7585
1315	0.0515155	15.7699	1315	0.782221	15.7715		1315	0.203885	15.7651
1316	0.0508023	15.7766	1316	0.777372	15.7782		1316	0.202799	15.7718
1317	0.0500298	15.7832	1317	0.772541	15.7848		1317	0.20151	15.7784
1318	0.0493497	15.7898	1318	0.767732	15.7915		1318	0.200346	15.785
1319	0.0485476	15.7967	1319	0.762509	15.7981		1319	0.199097	15.7917
1320	0.0479224	15.8033	1320	0.758012	15.805		1320	0.197843	15.7983
1321	0.0471775	15.81	1321	0.752369	15.8116		1321	0.196624	15.8052
1322	0.0465285	15.8166	1322	0.747727	15.8182		1322	0.195288	15.8118
1323	0.0458212	15.8232	1323	0.742289	15.8249		1323	0.194168	15.8185
1324	0.0451302	15.8299	1324	0.737499	15.8315		1324	0.192764	15.8251
1325	0.0444553	15.8365	1325	0.732432	15.8382		1325	0.191679	15.8317
1326	0.0437333	15.8432	1326	0.727291	15.8448		1326	0.190362	15.8384
1327	0.0431301	15.85	1327	0.722482	15.8514		1327	0.189175	15.845
1328	0.0424372	15.8567	1328	0.717095	15.8583		1328	0.187913	15.8516
1329	0.0418776	15.8633	1329	0.712445	15.8649		1329	0.186625	15.8585
1330	0.0412192	15.8699	1330	0.706701	15.8716		1330	0.185416	15.8651
1331	0.0406491	15.8766	1331	0.702119	15.8782		1331	0.184055	15.8718
1332	0.0400511	15.8832	1332	0.696661	15.8849		1332	0.182887	15.8784
1333	0.0394773	15.8899	1333	0.691692	15.8915		1333	0.181432	15.885
1334	0.0389331	15.8965	1334	0.686435	15.8981		1334	0.180255	15.8917
1335	0.0383365	15.9034	1335	0.68112	15.9048		1335	0.178873	15.8983
1336	0.0378468	15.91	1336	0.67625	15.9116		1336	0.17765	15.905
1337	0.0372733	15.9166	1337	0.670771	15.9183		1337	0.176374	15.9118
1338	0.0368011	15.9233	1338	0.666216	15.9249		1338	0.175096	15.9185
1339	0.0362427	15.9299	1339	0.660474	15.9315		1339	0.173907	15.9251
1340	0.0357668	15.9365	1340	0.65585	15.9382		1340	0.172569	15.9317
1341	0.0352467	15.9432	1341	0.650469	15.9448		1341	0.171451	15.9384
1342	0.0347383	15.9498	1342	0.645651	15.9514		1342	0.170026	15.945
1343	0.0342551	15.9567	1343	0.640511	15.9581		1343	0.168888	15.9517
1344	0.0337577	15.9633	1344	0.635309	15.9649		1344	0.167546	15.9583
1345	0.0333429	15.97	1345	0.630386	15.9716		1345	0.166349	15.9652
1346	0.0328536	15.9766	1346	0.624894	15.9782		1346	0.165083	15.9718
1347	0.0324521	15.9832	1347	0.620195	15.9849		1347	0.163826	15.9784
1348	0.0319701	15.9899	1348	0.614495	15.9915		1348	0.16263	15.9851
1349	0.0315671	15.9965	1349	0.609984	15.9981		1349	0.161318	15.9917
1350	0.0310952	16.0031	1350	0.604519	16.0048		1350	0.16018	15.9984
1351	0.0306654	16.01	1351	0.599557	16.0114		1351	0.158782	16.005
1352	0.0302504	16.0166	1352	0.594338	16.0183		1352	0.157691	16.0116
1353	0.0298366	16.0233	1353	0.589177	16.0249		1353	0.156364	16.0185
1354	0.0294488	16.0299	1354	0.584358	16.0315		1354	0.155207	16.0251
1355	0.0290047	16.0366	1355	0.579008	16.0382		1355	0.153938	16.0318
1356	0.0286349	16.0432	1356	0.574459	16.0448		1356	0.152703	16.0384
1357	0.028172	16.0498	1357	0.568846	16.0515		1357	0.151479	16.045
1358	0.0277896	16.0565	1358	0.564232	16.0581		1358	0.150182	16.0517
1359	0.0273648	16.0633	1359	0.558716	16.0648		1359	0.149048	16.0583
1360	0.0270113	16.07	1360	0.553898	16.0716		1360	0.147673	16.0649
1361	0.026655	16.0766	1361	0.548787	16.0783		1361	0.146557	16.0718
1362	0.0262969	16.0832	1362	0.543741	16.0849		1362	0.145229	16.0785
1363	0.0259474	16.0899	1363	0.53893	16.0915		1363	0.144078	16.0851
1364	0.0255488	16.0965	1364	0.533544	16.0982		1364	0.142828	16.0917
1365	0.0252237	16.1032	1365	0.528959	16.1048		1365	0.141625	16.0984
1366	0.0248367	16.1098	1366	0.523414	16.1115		1366	0.140452	16.105
1367	0.0245339	16.1167	1367	0.518955	16.1181		1367	0.139195	16.1116
1368	0.0241693	16.1233	1368	0.513576	16.1249		1368	0.138099	16.1183
1369	0.0238195	16.1299	1369	0.50884	16.1316		1369	0.136768	16.1251
1370	0.0234706	16.1366	1370	0.503855	16.1382		1370	0.135706	16.1318
1371	0.0231301	16.1432	1371	0.499001	16.1449		1371	0.134455	16.1384
1372	0.0228181	16.1499	1372	0.494329	16.1515		1372	0.13335	16.145
1373	0.0224738	16.1565	1373	0.489238	16.1581		1373	0.132176	16.1517
1374	0.0222017	16.1631	1374	0.484923	16.1648		1374	0.130999	16.1583
1375	0.02186	16.17	1375	0.479616	16.1714		1375	0.129891	16.165
1376	0.0215688	16.1766	1376	0.47529	16.1783		1376	0.128656	16.1716
1377	0.0212671	16.1833	1377	0.470128	16.1849		1377	0.127612	16.1785
1378	0.0210143	16.1899	1378	0.465702	16.1915		1378	0.126338	16.1851
1379	0.0207715	16.1965	1379	0.460904	16.1982		1379	0.125302	16.1917
1380	0.0204937	16.2032	1380	0.456221	16.2048		1380	0.124076	16.1984
1381	0.0202379	16.2098	1381	0.451651	16.2114		1381	0.122957	16.205
1382	0.0199351	16.2165	1382	0.446775	16.2181		1382	0.121797	16.2116
1383	0.0196876	16.2233	1383	0.442608	16.2247		1383	0.120648	16.2183
1384	0.0194157	16.23	1384	0.437418	16.2316		1384	0.119571	16.2249
1385	0.0192074	16.2366	1385	0.43324	16.2382		1385	0.118362	16.2318
1386	0.0189872	16.2432	1386	0.428396	16.2449		1386	0.117355	16.2384
1387	0.0187613	16.2499	1387	0.424243	16.2515		1387	0.116123	16.2451
1388	0.0185386	16.2565	1388	0.419711	16.2582		1388	0.115123	16.2517
1389	0.0183126	16.2631	1389	0.415329	16.2648		1389	0.113937	16.2583
1390	0.0181346	16.2698	1390	0.411097	16.2714		1390	0.112884	16.265
1391	0.0179089	16.2766	1391	0.406461	16.2781		1391	0.111798	16.2716
1392	0.0177338	16.2833	1392	0.402454	16.2849		1392	0.110716	16.2782
1393	0.0175164	16.2899	1393	0.397552	16.2916		1393	0.109688	16.2851
1394	0.0173098	16.2966	1394	0.393742	16.2982		1394	0.108544	16.2918
1395	0.0170939	16.3032	1395	0.389254	16.3048		1395	0.107581	16.2984
1396	0.016892	16.3098	1396	0.385193	16.3115		1396	0.10641	16.305
1397	0.0166982	16.3165	1397	0.380827	16.3181		1397	0.105465	16.3117
1398	0.0164745	16.3231	1398	0.376534	16.3248		1398	0.104346	16.3183
1399	0.016276	16.33	1399	0.372521	16.3314		1399	0.103378	16.325
1400	0.0160445	16.3366	1400	0.368033	16.3383		1400	0.102354	16.3316
1401	0.0158666	16.3433	1401	0.3643	16.3449		1401	0.10133	16.3384
1402	0.015666	16.3499	1402	0.35977	16.3515		1402	0.100354	16.3451
1403	0.0155027	16.3565	1403	0.356146	16.3582		1403	0.09928	16.3517
1404	0.015325	16.3632	1404	0.351918	16.3648		1404	0.098389	16.3584
1405	0.0151441	16.3698	1405	0.34815	16.3714		1405	0.097297	16.365
1406	0.0149713	16.3764	1406	0.344179	16.3781		1406	0.096413	16.3716
1407	0.0148066	16.3833	1407	0.340219	16.3847		1407	0.09535	16.3783
1408	0.0146749	16.3899	1408	0.336478	16.3916		1408	0.094403	16.3849
1409	0.014496	16.3966	1409	0.332307	16.3982		1409	0.093418	16.3918
1410	0.0143501	16.4032	1410	0.328804	16.4049		1410	0.092453	16.3984
1411	0.0141726	16.4099	1411	0.324582	16.4115		1411	0.091558	16.405
1412	0.0140162	16.4165	1412	0.321159	16.4181		1412	0.090564	16.4117
1413	0.0138554	16.4231	1413	0.317112	16.4248		1413	0.089732	16.4183
1414	0.0137185	16.4298	1414	0.313525	16.4314		1414	0.088698	16.425
1415	0.013584	16.4366	1415	0.309774	16.4381		1415	0.087873	16.4316
1416	0.0134385	16.4433	1416	0.30611	16.4449		1416	0.086887	16.4382
1417	0.013292	16.4499	1417	0.302655	16.4516		1417	0.086035	16.4451
1418	0.0131132	16.4565	1418	0.29893	16.4582		1418	0.085153	16.4517
1419	0.0129843	16.4632	1419	0.29579	16.4648		1419	0.084269	16.4584
1420	0.0128867	16.4698	1420	0.291966	16.4715		1420	0.083426	16.465
1421	0.0128225	16.4765	1421	0.288859	16.4781		1421	0.082462	16.4717
1422	0.0127186	16.4831	1422	0.285178	16.4847		1422	0.081653	16.4783
1423	0.0126058	16.49	1423	0.28201	16.4914		1423	0.080666	16.4849
1424	0.012488	16.4966	1424	0.278583	16.4982		1424	0.079876	16.4916
1425	0.0123763	16.5032	1425	0.275207	16.5049		1425	0.078952	16.4984
1426	0.0122702	16.5099	1426	0.271999	16.5115		1426	0.078146	16.5051
1427	0.012132	16.5165	1427	0.268496	16.5181		1427	0.077298	16.5117
1428	0.0120331	16.5232	1428	0.265533	16.5248		1428	0.076449	16.5184
1429	0.0119008	16.5298	1429	0.261911	16.5314		1429	0.075658	16.525
1430	0.0117351	16.5364	1430	0.259019	16.5381		1430	0.074757	16.5316
1431	0.0115833	16.5433	1431	0.255641	16.5447		1431	0.074021	16.5383
1432	0.0114803	16.5499	1432	0.252666	16.5516		1432	0.07315	16.5449
1433	0.0113702	16.5566	1433	0.249517	16.5582		1433	0.07245	16.5518
1434	0.0112397	16.5632	1434	0.246445	16.5648		1434	0.071651	16.5584
1435	0.0111203	16.5698	1435	0.243542	16.5715		1435	0.070934	16.565
1436	0.0110179	16.5765	1436	0.240358	16.5781		1436	0.070179	16.5717
1437	0.0109573	16.5831	1437	0.237702	16.5848		1437	0.06941	16.5783
1438	0.0108916	16.5898	1438	0.234411	16.5914		1438	0.068703	16.5849
1439	0.0108589	16.5966	1439	0.231786	16.598		1439	0.067888	16.5916
1440	0.0107894	16.6033	1440	0.228757	16.6049		1440	0.067237	16.5982
1441	0.0106857	16.6099	1441	0.226059	16.6115		1441	0.066451	16.6051
1442	0.0105792	16.6165	1442	0.223269	16.6182		1442	0.065791	16.6117
1443	0.0105033	16.6232	1443	0.22049	16.6248		1443	0.065036	16.6184
1444	0.0104546	16.6298	1444	0.217928	16.6315		1444	0.064337	16.625
1445	0.0103685	16.6364	1445	0.215022	16.6381		1445	0.063613	16.6316
1446	0.0102759	16.6431	1446	0.212582	16.6447		1446	0.062883	16.6383
1447	0.0101656	16.6499	1447	0.209598	16.6514		1447	0.062224	16.6449
1448	0.0100564	16.6566	1448	0.207249	16.6582		1448	0.061492	16.6516
1449	0.00994921	16.6632	1449	0.204546	16.6649		1449	0.060903	16.6584
1450	0.00988238	16.6699	1450	0.202092	16.6715		1450	0.060179	16.6651
1451	0.00983021	16.6765	1451	0.19957	16.6781		1451	0.059585	16.6717
1452	0.00976596	16.6831	1452	0.197046	16.6848		1452	0.058895	16.6783
1453	0.00969649	16.6898	1453	0.194694	16.6914		1453	0.058265	16.685
1454	0.00959983	16.6964	1454	0.192039	16.698		1454	0.057612	16.6916
1455	0.00953817	16.7032	1455	0.189892	16.7047		1455	0.056963	16.6983
1456	0.00946919	16.7099	1456	0.187272	16.7116		1456	0.056362	16.7049
1457	0.00941513	16.7166	1457	0.185196	16.7182		1457	0.055683	16.7117
1458	0.00936087	16.7232	1458	0.182698	16.7248		1458	0.055103	16.7184
1459	0.00930054	16.7298	1459	0.18046	16.7315		1459	0.054422	16.725
1460	0.00923106	16.7365	1460	0.178169	16.7381		1460	0.053876	16.7317
1461	0.00913774	16.7431	1461	0.17586	16.7447		1461	0.053224	16.7383
1462	0.00905303	16.7497	1462	0.173704	16.7514		1462	0.052637	16.7449
1463	0.00897374	16.7566	1463	0.171239	16.758		1463	0.052032	16.7516
1464	0.00892443	16.7632	1464	0.169206	16.7649		1464	0.051432	16.7582
1465	0.00884911	16.7699	1465	0.166796	16.7715		1465	0.05088	16.765
1466	0.00876707	16.7765	1466	0.164851	16.7782		1466	0.050273	16.7717
1467	0.00868858	16.7832	1467	0.162596	16.7848		1467	0.049774	16.7784
1468	0.00861505	16.7898	1468	0.160617	16.7914		1468	0.04918	16.785
1469	0.00854472	16.7964	1469	0.158598	16.7981		1469	0.048683	16.7916
1470	0.00847775	16.8031	1470	0.156547	16.8047		1470	0.048123	16.7983
1471	0.00843828	16.8099	1471	0.154651	16.8113		1471	0.047648	16.8049
1472	0.00840769	16.8166	1472	0.152512	16.8182		1472	0.047147	16.8115
1473	0.00837224	16.8232	1473	0.150818	16.8248		1473	0.046633	16.8184
1474	0.00831796	16.8298	1474	0.148774	16.8315		1474	0.046152	16.825
1475	0.00828378	16.8365	1475	0.147099	16.8381		1475	0.0456	16.8317
1476	0.00826052	16.8431	1476	0.145108	16.8448		1476	0.045139	16.8383
1477	0.00823291	16.8498	1477	0.143324	16.8514		1477	0.044578	16.845
1478	0.00820138	16.8564	1478	0.141454	16.858		1478	0.044114	16.8516
1479	0.00816013	16.8632	1479	0.139559	16.8647		1479	0.043579	16.8582
1480	0.00812328	16.8699	1480	0.137816	16.8715		1480	0.043084	16.8649
1481	0.00811664	16.8765	1481	0.13594	16.8782		1481	0.042566	16.8717
1482	0.0081024	16.8832	1482	0.134394	16.8848		1482	0.042072	16.8784
1483	0.00802892	16.8898	1483	0.132505	16.8914		1483	0.041623	16.885
1484	0.00795319	16.8965	1484	0.130967	16.8981		1484	0.041138	16.8916
1485	0.00788816	16.9031	1485	0.129192	16.9047		1485	0.04074	16.8983
1486	0.00782982	16.9097	1486	0.12768	16.9113		1486	0.04024	16.9049
1487	0.0077814	16.9165	1487	0.126098	16.918		1487	0.039839	16.9115
1488	0.00775397	16.9232	1488	0.124588	16.9249		1488	0.039363	16.9182
1489	0.0077375	16.9299	1489	0.123181	16.9315		1489	0.038951	16.925
1490	0.00765952	16.9365	1490	0.121589	16.9381		1490	0.038514	16.9317
1491	0.00755007	16.9432	1491	0.120213	16.9448		1491	0.038098	16.9383
1492	0.00744878	16.9498	1492	0.118545	16.9514		1492	0.037692	16.945
1493	0.00740981	16.9564	1493	0.11722	16.9581		1493	0.037254	16.9516
1494	0.00739482	16.9631	1494	0.115654	16.9647		1494	0.036875	16.9582
1495	0.00737963	16.9699	1495	0.114247	16.9713		1495	0.036432	16.9649
1496	0.00736043	16.9766	1496	0.112749	16.9782		1496	0.036095	16.9715
1497	0.00733339	16.9832	1497	0.111274	16.9848		1497	0.035669	16.9783
1498	0.00728844	16.9898	1498	0.10989	16.9915		1498	0.035308	16.985
1499	0.00723661	16.9965	1499	0.108426	16.9981		1499	0.034916	16.9917
1500	0.00724629	17.0031	1500	0.107227	17.0047		1500	0.034545	16.9983
1501	0.0072361	17.0097	1501	0.105738	17.0114		1501	0.03416	17.0049
1502	0.00721119	17.0164	1502	0.104563	17.018		1502	0.033745	17.0116
1503	0.00719833	17.0232	1503	0.103189	17.0247		1503	0.033386	17.0182
1504	0.00719347	17.0299	1504	0.101999	17.0315		1504	0.032983	17.0249
1505	0.00717752	17.0365	1505	0.100746	17.0382		1505	0.032652	17.0316
1506	0.00714705	17.0432	1506	0.099521	17.0448		1506	0.032262	17.0384
1507	0.00711815	17.0498	1507	0.098392	17.0514		1507	0.031949	17.045
1508	0.00707192	17.0564	1508	0.097176	17.0581		1508	0.031602	17.0516
1509	0.00703256	17.0631	1509	0.096132	17.0647		1509	0.031273	17.0583
1510	0.00698591	17.0697	1510	0.094839	17.0713		1510	0.030942	17.0649
1511	0.00695834	17.0765	1511	0.093843	17.078		1511	0.030614	17.0715
1512	0.00693506	17.0832	1512	0.092636	17.0848		1512	0.030334	17.0782
1513	0.00689532	17.0898	1513	0.091575	17.0915		1513	0.029996	17.085
1514	0.00683861	17.0965	1514	0.090473	17.0981		1514	0.029709	17.0917
1515	0.00677655	17.1031	1515	0.089454	17.1048		1515	0.029366	17.0983
1516	0.00673107	17.1098	1516	0.08847	17.1114		1516	0.029075	17.1049
1517	0.00671097	17.1164	1517	0.087348	17.118		1517	0.028758	17.1116
1518	0.00670819	17.123	1518	0.086356	17.1247		1518	0.02846	17.1182
1519	0.00667315	17.1298	1519	0.085191	17.1313		1519	0.028167	17.1249
1520	0.00663926	17.1365	1520	0.08428	17.1382		1520	0.02786	17.1315
1521	0.00661391	17.1432	1521	0.083209	17.1448		1521	0.02759	17.1383
1522	0.00659427	17.1498	1522	0.082327	17.1515		1522	0.027276	17.145
1523	0.00657022	17.1564	1523	0.081379	17.1581		1523	0.027028	17.1517
1524	0.00654257	17.1631	1524	0.080448	17.1647		1524	0.026735	17.1583
1525	0.00652951	17.1697	1525	0.079494	17.1714		1525	0.026483	17.1649
1526	0.00652612	17.1764	1526	0.078473	17.178		1526	0.026215	17.1716
1527	0.00649734	17.1831	1527	0.077629	17.1847		1527	0.025961	17.1782
1528	0.00643478	17.1899	1528	0.076676	17.1915		1528	0.025716	17.1849
1529	0.00639986	17.1965	1529	0.075903	17.1981		1529	0.025453	17.1916
1530	0.00637353	17.2031	1530	0.074958	17.2048		1530	0.025226	17.1984
1531	0.00634219	17.2098	1531	0.074145	17.2114		1531	0.024943	17.205
1532	0.00630158	17.2164	1532	0.073264	17.2181		1532	0.024716	17.2116
1533	0.00625725	17.2231	1533	0.072456	17.2247		1533	0.024448	17.2183
1534	0.00622143	17.2297	1534	0.071642	17.2313		1534	0.02422	17.2249
1535	0.00617893	17.2365	1535	0.0708	17.238		1535	0.023974	17.2315
1536	0.00612514	17.2432	1536	0.07009	17.2448		1536	0.023736	17.2382
1537	0.0060767	17.2498	1537	0.069271	17.2515		1537	0.023507	17.2449
1538	0.00606294	17.2565	1538	0.068585	17.2581		1538	0.023279	17.2517
1539	0.00605452	17.2631	1539	0.067749	17.2647		1539	0.023074	17.2583
1540	0.00604409	17.2698	1540	0.067067	17.2714		1540	0.022816	17.265
1541	0.00602063	17.2764	1541	0.066294	17.278		1541	0.022617	17.2716
1542	0.00598443	17.283	1542	0.065537	17.2846		1542	0.022383	17.2782
1543	0.00595962	17.2898	1543	0.064798	17.2913		1543	0.02219	17.2849
1544	0.00594854	17.2965	1544	0.064101	17.2981		1544	0.021966	17.2915
1545	0.00594259	17.3032	1545	0.063499	17.3048		1545	0.021764	17.2983
1546	0.00591045	17.3098	1546	0.062782	17.3114		1546	0.021546	17.305
1547	0.00587068	17.3164	1547	0.062189	17.3181		1547	0.021315	17.3116
1548	0.00583261	17.3231	1548	0.061434	17.3247		1548	0.021088	17.3183
1549	0.00579498	17.3297	1549	0.060807	17.3314		1549	0.02085	17.3249
1550	0.00576873	17.3363	1550	0.060118	17.338		1550	0.020667	17.3315
1551	0.00576904	17.3431	1551	0.059508	17.3446		1551	0.020451	17.3382
1552	0.00578693	17.3499	1552	0.058919	17.3515		1552	0.020269	17.3448
1553	0.00580342	17.3565	1553	0.058285	17.3581		1553	0.020063	17.3516
1554	0.00580689	17.3631	1554	0.057674	17.3648		1554	0.019887	17.3583
1555	0.00576621	17.3698	1555	0.056995	17.3714		1555	0.01971	17.365
1556	0.00574988	17.3764	1556	0.056455	17.3781		1556	0.019557	17.3716
1557	0.00574511	17.383	1557	0.055814	17.3847		1557	0.019411	17.3782
1558	0.00574102	17.3897	1558	0.055328	17.3913		1558	0.019243	17.3849
1559	0.00574741	17.3964	1559	0.054768	17.398		1559	0.019101	17.3915
1560	0.00575468	17.4032	1560	0.054245	17.4048		1560	0.018918	17.3982
1561	0.00573736	17.4098	1561	0.053707	17.4115		1561	0.018769	17.4049
1562	0.00568146	17.4165	1562	0.053165	17.4181		1562	0.018607	17.4117
1563	0.00562445	17.4231	1563	0.052661	17.4247		1563	0.018466	17.4183
1564	0.00558406	17.4297	1564	0.052075	17.4314		1564	0.018302	17.4249
1565	0.00558887	17.4364	1565	0.051579	17.438		1565	0.018124	17.4316
1566	0.0056079	17.443	1566	0.051027	17.4446		1566	0.017941	17.4382
1567	0.00562403	17.4497	1567	0.050575	17.4513		1567	0.017748	17.4448
1568	0.00561897	17.4565	1568	0.050052	17.4581		1568	0.017591	17.4515
1569	0.00557748	17.4632	1569	0.049584	17.4648		1569	0.01741	17.4582
1570	0.0055236	17.4698	1570	0.049118	17.4714		1570	0.017273	17.465
1571	0.00548114	17.4764	1571	0.048651	17.4781		1571	0.017126	17.4716
1572	0.00547699	17.4831	1572	0.04823	17.4847		1572	0.016989	17.4783
1573	0.00548644	17.4897	1573	0.04776	17.4913		1573	0.016824	17.4849
1574	0.00548111	17.4963	1574	0.047393	17.498		1574	0.016659	17.4915
1575	0.00544663	17.5031	1575	0.046924	17.5046		1575	0.016509	17.4982
1576	0.00538531	17.5098	1576	0.046498	17.5115		1576	0.016338	17.5048
1577	0.00533055	17.5165	1577	0.046032	17.5181		1577	0.016196	17.5115
1578	0.00531313	17.5231	1578	0.045619	17.5247		1578	0.016065	17.5183
1579	0.00531983	17.5298	1579	0.045206	17.5314		1579	0.015957	17.525
1580	0.00532332	17.5364	1580	0.044754	17.538		1580	0.015834	17.5316
1581	0.00532499	17.543	1581	0.044355	17.5447		1581	0.015718	17.5382
1582	0.00532223	17.5497	1582	0.043906	17.5513		1582	0.015575	17.5449
1583	0.0053057	17.5564	1583	0.04354	17.5579		1583	0.015439	17.5515
1584	0.00526331	17.5632	1584	0.043105	17.5648		1584	0.015326	17.5581
1585	0.00523664	17.5698	1585	0.042757	17.5714		1585	0.015211	17.5648
1586	0.00522289	17.5764	1586	0.042397	17.5781		1586	0.015128	17.5716
1587	0.00519405	17.5831	1587	0.042062	17.5847		1587	0.015036	17.5783
1588	0.00515071	17.5897	1588	0.041714	17.5914		1588	0.014934	17.5849
1589	0.00512762	17.5963	1589	0.041332	17.598		1589	0.014818	17.5916
1590	0.00510743	17.603	1590	0.041024	17.6046		1590	0.014712	17.5982
1591	0.00506677	17.6097	1591	0.040683	17.6113		1591	0.014593	17.6048
1592	0.00503012	17.6165	1592	0.040402	17.6181		1592	0.014484	17.6115
1593	0.00500599	17.6231	1593	0.040086	17.6248		1593	0.014395	17.6182
1594	0.00501067	17.6298	1594	0.039835	17.6314		1594	0.014291	17.625
1595	0.00502119	17.6364	1595	0.039553	17.638		1595	0.014203	17.6316
1596	0.00502496	17.643	1596	0.039273	17.6447		1596	0.014091	17.6382
1597	0.00502228	17.6497	1597	0.038962	17.6513		1597	0.013989	17.6449
1598	0.00498424	17.6563	1598	0.038617	17.6579		1598	0.013873	17.6515
1599	0.00492658	17.663	1599	0.038334	17.6646		1599	0.013766	17.6582
1600	0.00490634	17.6698	1600	0.038001	17.6715		1600	0.013656	17.6648
1601	0.00490735	17.6765	1601	0.037706	17.6781		1601	0.013556	17.6715
1602	0.00491548	17.6831	1602	0.037373	17.6847		1602	0.013467	17.6783
1603	0.00491474	17.6897	1603	0.037074	17.6914		1603	0.013355	17.6849
1604	0.00490464	17.6964	1604	0.036713	17.698		1604	0.013263	17.6916
1605	0.00489478	17.703	1605	0.036369	17.7046		1605	0.01317	17.6982
1606	0.00489219	17.7097	1606	0.036036	17.7113		1606	0.013099	17.7049
1607	0.00489057	17.7163	1607	0.035739	17.7179		1607	0.012997	17.7115
1608	0.00491943	17.7232	1608	0.035505	17.7248		1608	0.012897	17.7181
1609	0.00494277	17.7298	1609	0.03525	17.7314		1609	0.012796	17.7248
1610	0.00492806	17.7364	1610	0.035049	17.7381		1610	0.012698	17.7316
1611	0.004912	17.7431	1611	0.034769	17.7447		1611	0.012604	17.7383
1612	0.00488894	17.7497	1612	0.03452	17.7513		1612	0.012508	17.7449
1613	0.00487016	17.7563	1613	0.034273	17.758		1613	0.012441	17.7515
1614	0.00486501	17.763	1614	0.034092	17.7646		1614	0.012359	17.7582
1615	0.0048609	17.7697	1615	0.033896	17.7712		1615	0.012277	17.7648
1616	0.00484117	17.7765	1616	0.033671	17.7781		1616	0.012188	17.7714
1617	0.00482882	17.7831	1617	0.033447	17.7848		1617	0.012128	17.7781
1618	0.0048106	17.7898	1618	0.033198	17.7914		1618	0.012069	17.7849
1619	0.00479791	17.7964	1619	0.032982	17.798		1619	0.012001	17.7916
1620	0.00478903	17.803	1620	0.032729	17.8047		1620	0.011935	17.7982
1621	0.00478176	17.8097	1621	0.032555	17.8113		1621	0.011854	17.8049
1622	0.00476223	17.8163	1622	0.032334	17.8179		1622	0.011784	17.8115
1623	0.00472344	17.823	1623	0.032099	17.8246		1623	0.01169	17.8181
1624	0.00468086	17.8298	1624	0.031852	17.8315		1624	0.011607	17.8248
1625	0.00465857	17.8364	1625	0.031635	17.8381		1625	0.01153	17.8315
1626	0.00465379	17.8431	1626	0.031453	17.8447		1626	0.011463	17.8383
1627	0.00467001	17.8497	1627	0.03127	17.8514		1627	0.011383	17.8449
1628	0.0046921	17.8563	1628	0.031119	17.858		1628	0.011288	17.8515
1629	0.00469177	17.863	1629	0.03088	17.8646		1629	0.011204	17.8582
1630	0.0046833	17.8696	1630	0.03068	17.8713		1630	0.011115	17.8648
1631	0.00467604	17.8763	1631	0.030417	17.8779		1631	0.011042	17.8715
1632	0.00468263	17.8831	1632	0.030194	17.8848		1632	0.010946	17.8781
1633	0.00469466	17.8898	1633	0.029997	17.8914		1633	0.010871	17.8848
1634	0.00468957	17.8964	1634	0.029823	17.8981		1634	0.010809	17.8916
1635	0.00466715	17.903	1635	0.029632	17.9047		1635	0.010749	17.8983
1636	0.00462319	17.9097	1636	0.029378	17.9113		1636	0.010676	17.9049
1637	0.00455848	17.9163	1637	0.029137	17.918		1637	0.010602	17.9115
1638	0.00449618	17.923	1638	0.028915	17.9246		1638	0.010554	17.9182
1639	0.00445678	17.9296	1639	0.028779	17.9312		1639	0.010503	17.9248
1640	0.00443783	17.9365	1640	0.028583	17.9381		1640	0.010462	17.9314
1641	0.00442886	17.9431	1641	0.028437	17.9447		1641	0.010404	17.9381
1642	0.00441713	17.9497	1642	0.028285	17.9514		1642	0.010364	17.9449
1643	0.00440851	17.9564	1643	0.02811	17.958		1643	0.010329	17.9516
1644	0.00440952	17.963	1644	0.027912	17.9646		1644	0.010285	17.9582
1645	0.00439298	17.9697	1645	0.027727	17.9713		1645	0.010223	17.9648
1646	0.0043971	17.9763	1646	0.027592	17.9779		1646	0.010153	17.9715
1647	0.00441564	17.983	1647	0.027389	17.9845		1647	0.010102	17.9781
1648	0.00443338	17.9898	1648	0.027172	17.9914		1648	0.010067	17.9848
1649	0.00444459	17.9964	1649	0.026974	17.9981		1649	0.010035	17.9914
1650	0.00443717	18.0031	1650	0.026838	18.0047		1650	0.009961	17.9983
1651	0.00442371	18.0097	1651	0.026681	18.0113		1651	0.009904	18.0049
1652	0.00441947	18.0164	1652	0.026527	18.018		1652	0.009876	18.0115
1653	0.00440566	18.023	1653	0.026385	18.0246		1653	0.009856	18.0182
1654	0.00435416	18.0296	1654	0.026256	18.0312		1654	0.009818	18.0248
1655	0.00432253	18.0363	1655	0.026135	18.0379		1655	0.009777	18.0315
1656	0.00434191	18.0431	1656	0.025987	18.0448		1656	0.009749	18.0381
1657	0.00434688	18.0498	1657	0.025906	18.0514		1657	0.009711	18.0448
1658	0.00432873	18.0564	1658	0.025768	18.058		1658	0.009657	18.0516
1659	0.0043091	18.063	1659	0.025609	18.0647		1659	0.009603	18.0582
1660	0.00429758	18.0697	1660	0.02546	18.0713		1660	0.009591	18.0649
1661	0.00428539	18.0763	1661	0.025349	18.078		1661	0.009571	18.0715
1662	0.00425741	18.0829	1662	0.025231	18.0846		1662	0.009523	18.0781
1663	0.00422153	18.0896	1663	0.025085	18.0912		1663	0.00946	18.0848
1664	0.00422974	18.0965	1664	0.024936	18.0981		1664	0.00941	18.0914
1665	0.00428625	18.1031	1665	0.024778	18.1047		1665	0.009375	18.0981
1666	0.00429174	18.1097	1666	0.024664	18.1114		1666	0.009342	18.1049
1667	0.00429027	18.1164	1667	0.024514	18.118		1667	0.009316	18.1116
1668	0.00430899	18.123	1668	0.024417	18.1246		1668	0.009278	18.1182
1669	0.00431516	18.1296	1669	0.024321	18.1313		1669	0.009241	18.1248
1670	0.00430501	18.1363	1670	0.024214	18.1379		1670	0.009198	18.1315
1671	0.00429127	18.1429	1671	0.024087	18.1445		1671	0.009163	18.1381
1672	0.00428826	18.1498	1672	0.023969	18.1514		1672	0.009114	18.1447
1673	0.00430016	18.1564	1673	0.023872	18.158		1673	0.00906	18.1514
1674	0.00426689	18.1631	1674	0.023752	18.1647		1674	0.009012	18.1582
1675	0.00418531	18.1697	1675	0.023649	18.1713		1675	0.008966	18.1649
1676	0.00415248	18.1763	1676	0.023495	18.178		1676	0.008918	18.1715
1677	0.00413323	18.183	1677	0.023371	18.1846		1677	0.008852	18.1782
1678	0.00410443	18.1896	1678	0.023224	18.1912		1678	0.008797	18.1848
1679	0.00408847	18.1963	1679	0.023065	18.1979		1679	0.008754	18.1914
1680	0.00408493	18.2031	1680	0.022914	18.2048		1680	0.008719	18.1981
1681	0.00408172	18.2098	1681	0.022792	18.2114		1681	0.00866	18.2047
1682	0.00407545	18.2164	1682	0.022676	18.218		1682	0.008602	18.2116
1683	0.0040707	18.223	1683	0.022513	18.2247		1683	0.008554	18.2182
1684	0.00410691	18.2297	1684	0.022377	18.2313		1684	0.008502	18.2249
1685	0.00416067	18.2363	1685	0.022299	18.2379		1685	0.00845	18.2315
1686	0.00416952	18.2429	1686	0.02228	18.2446		1686	0.008403	18.2381
1687	0.00416478	18.2496	1687	0.022243	18.2512		1687	0.008377	18.2448
1688	0.00416587	18.2564	1688	0.022219	18.2581		1688	0.008348	18.2514
1689	0.00418112	18.2631	1689	0.022168	18.2647		1689	0.008307	18.2581
1690	0.0042114	18.2697	1690	0.022047	18.2714		1690	0.008249	18.2649
1691	0.00423882	18.2763	1691	0.021917	18.278		1691	0.00821	18.2716
1692	0.0042504	18.283	1692	0.021841	18.2846		1692	0.008184	18.2782
1693	0.00426606	18.2896	1693	0.021818	18.2913		1693	0.008159	18.2848
1694	0.00427659	18.2962	1694	0.021726	18.2979		1694	0.008137	18.2915
1695	0.00426829	18.3029	1695	0.021571	18.3045		1695	0.008121	18.2981
1696	0.00427297	18.3098	1696	0.021444	18.3114		1696	0.008102	18.3047
1697	0.00429782	18.3164	1697	0.021363	18.318		1697	0.008072	18.3114
1698	0.004315	18.323	1698	0.021278	18.3247		1698	0.008044	18.3182
1699	0.00428019	18.3297	1699	0.021203	18.3313		1699	0.008008	18.3249
1700	0.00422924	18.3363	1700	0.021192	18.338		1700	0.007985	18.3315
1701	0.00419831	18.3429	1701	0.021177	18.3446		1701	0.007979	18.3382
1702	0.00418563	18.3496	1702	0.021118	18.3512		1702	0.007986	18.3448
1703	0.00418795	18.3562	1703	0.021028	18.3579		1703	0.007986	18.3514
1704	0.00420245	18.3631	1704	0.021004	18.3647		1704	0.007969	18.3581
1705	0.00421544	18.3697	1705	0.021002	18.3714		1705	0.007946	18.3647
1706	0.00420773	18.3764	1706	0.02097	18.378		1706	0.007921	18.3716
1707	0.00419169	18.383	1707	0.020899	18.3847		1707	0.007907	18.3782
1708	0.00420566	18.3896	1708	0.020829	18.3913		1708	0.007869	18.3849
1709	0.00426472	18.3963	1709	0.020785	18.3979		1709	0.007836	18.3915
1710	0.00433942	18.4029	1710	0.020733	18.4045		1710	0.007813	18.3981
1711	0.00439511	18.4096	1711	0.020677	18.4112		1711	0.007783	18.4048
1712	0.00443461	18.4164	1712	0.020628	18.4181		1712	0.007739	18.4114
1713	0.0044531	18.4231	1713	0.020611	18.4247		1713	0.007693	18.418
1714	0.00446008	18.4297	1714	0.020548	18.4313		1714	0.007662	18.4249
1715	0.00446373	18.4363	1715	0.020447	18.438		1715	0.007623	18.4315
1716	0.00447461	18.443	1716	0.02034	18.4446		1716	0.007587	18.4382
1717	0.00449401	18.4496	1717	0.020246	18.4512		1717	0.00756	18.4448
1718	0.00449611	18.4563	1718	0.020162	18.4579		1718	0.007557	18.4515
1719	0.00451052	18.4629	1719	0.020035	18.4645		1719	0.007552	18.4581
1720	0.00451005	18.4697	1720	0.019914	18.4714		1720	0.007536	18.4647
1721	0.00450218	18.4764	1721	0.019801	18.478		1721	0.007505	18.4714
1722	0.00450561	18.483	1722	0.019681	18.4846		1722	0.00747	18.4782
1723	0.00453221	18.4897	1723	0.019542	18.4913		1723	0.00744	18.4849
1724	0.00458339	18.4963	1724	0.019444	18.4979		1724	0.007402	18.4915
1725	0.00463757	18.5029	1725	0.019352	18.5046		1725	0.007371	18.4981
1726	0.0046784	18.5096	1726	0.019246	18.5112		1726	0.007338	18.5048
1727	0.00470644	18.5162	1727	0.019142	18.5178		1727	0.007296	18.5114
1728	0.00476399	18.5231	1728	0.019049	18.5247		1728	0.007268	18.518
1729	0.00480923	18.5297	1729	0.019001	18.5313		1729	0.007251	18.5247
1730	0.00487556	18.5364	1730	0.018916	18.538		1730	0.007232	18.5315
1731	0.00495512	18.543	1731	0.018821	18.5446		1731	0.007216	18.5382
1732	0.00506418	18.5496	1732	0.018751	18.5513		1732	0.007211	18.5448
1733	0.00518281	18.5563	1733	0.018714	18.5579		1733	0.007213	18.5515
1734	0.00528302	18.5629	1734	0.018683	18.5645		1734	0.007224	18.5581
1735	0.00539249	18.5695	1735	0.018661	18.5712		1735	0.007223	18.5647
1736	0.00551195	18.5764	1736	0.018653	18.578		1736	0.007224	18.5714
1737	0.00565544	18.583	1737	0.01863	18.5847		1737	0.00722	18.578
1738	0.00576994	18.5897	1738	0.018607	18.5913		1738	0.0072	18.5849
1739	0.00595866	18.5963	1739	0.018524	18.598		1739	0.007166	18.5915
1740	0.0061516	18.6029	1740	0.018475	18.6046		1740	0.007129	18.5981
1741	0.00635385	18.6096	1741	0.018424	18.6112		1741	0.007099	18.6048
1742	0.00654364	18.6162	1742	0.018346	18.6179		1742	0.007075	18.6114
1743	0.00672266	18.6229	1743	0.018239	18.6245		1743	0.007048	18.6181
1744	0.00695062	18.6297	1744	0.018118	18.6314		1744	0.007028	18.6247
1745	0.00717465	18.6364	1745	0.018016	18.638		1745	0.007021	18.6313
1746	0.00745126	18.643	1746	0.017978	18.6446		1746	0.007002	18.6382
1747	0.00770323	18.6496	1747	0.017954	18.6513		1747	0.006984	18.6449
1748	0.00801519	18.6563	1748	0.017849	18.6579		1748	0.006959	18.6515
1749	0.00826806	18.6629	1749	0.017802	18.6646		1749	0.006935	18.6581
1750	0.00854671	18.6695	1750	0.017746	18.6712		1750	0.006919	18.6648
1751	0.00884748	18.6762	1751	0.017691	18.6778		1751	0.006898	18.6714
1752	0.00915478	18.6831	1752	0.017667	18.6847		1752	0.006869	18.678
1753	0.0094831	18.6897	1753	0.017682	18.6913		1753	0.00683	18.6847
1754	0.00977234	18.6963	1754	0.017701	18.698		1754	0.006784	18.6915
1755	0.0101305	18.703	1755	0.017678	18.7046		1755	0.006726	18.6982
1756	0.010436	18.7096	1756	0.017594	18.7112		1756	0.006675	18.7048
1757	0.0108291	18.7163	1757	0.017514	18.7179		1757	0.006647	18.7114
1758	0.0111759	18.7229	1758	0.017514	18.7245		1758	0.006638	18.7181
1759	0.0115661	18.7295	1759	0.017512	18.7311		1759	0.006626	18.7247
1760	0.0119403	18.7364	1760	0.017519	18.738		1760	0.006588	18.7314
1761	0.0123119	18.743	1761	0.017524	18.7447		1761	0.006553	18.738
1762	0.0127196	18.7497	1762	0.017497	18.7513		1762	0.006527	18.7449
1763	0.0131059	18.7563	1763	0.017434	18.7579		1763	0.006512	18.7515
1764	0.0135618	18.7629	1764	0.017358	18.7646		1764	0.006492	18.7582
1765	0.0139466	18.7696	1765	0.017311	18.7712		1765	0.006482	18.7648
1766	0.0143699	18.7762	1766	0.017266	18.7779		1766	0.006472	18.7714
1767	0.0147082	18.7829	1767	0.017217	18.7845		1767	0.006442	18.7781
1768	0.0150946	18.7897	1768	0.017126	18.7914		1768	0.006401	18.7847
1769	0.0154577	18.7964	1769	0.01703	18.798		1769	0.006369	18.7913
1770	0.0158233	18.803	1770	0.016967	18.8046		1770	0.006365	18.7982
1771	0.0162028	18.8096	1771	0.016942	18.8113		1771	0.006352	18.8048
1772	0.0165357	18.8163	1772	0.016912	18.8179		1772	0.00633	18.8115
1773	0.0168944	18.8229	1773	0.016861	18.8245		1773	0.006308	18.8181
1774	0.017172	18.8295	1774	0.016835	18.8312		1774	0.00629	18.8247
1775	0.0175202	18.8362	1775	0.01682	18.8378		1775	0.006269	18.8314
1776	0.0178315	18.8431	1776	0.016803	18.8447		1776	0.00625	18.838
1777	0.0181821	18.8497	1777	0.016793	18.8513		1777	0.006241	18.8447
1778	0.0184849	18.8563	1778	0.016826	18.858		1778	0.006248	18.8515
1779	0.0187919	18.863	1779	0.016856	18.8646		1779	0.006253	18.8581
1780	0.0190939	18.8696	1780	0.016839	18.8712		1780	0.006243	18.8648
1781	0.0193636	18.8762	1781	0.016787	18.8779		1781	0.00624	18.8714
1782	0.019658	18.8829	1782	0.01674	18.8845		1782	0.006225	18.8781
1783	0.0199144	18.8895	1783	0.016723	18.8911		1783	0.006207	18.8847
1784	0.0202216	18.8964	1784	0.016705	18.898		1784	0.006184	18.8913
1785	0.0204579	18.903	1785	0.016674	18.9047		1785	0.006163	18.898
1786	0.0207435	18.9097	1786	0.016642	18.9113		1786	0.006146	18.9048
1787	0.0210051	18.9163	1787	0.016601	18.9179		1787	0.006125	18.9115
1788	0.021263	18.9229	1788	0.016552	18.9246		1788	0.006091	18.9181
1789	0.0214925	18.9296	1789	0.016512	18.9312		1789	0.006075	18.9247
1790	0.0216967	18.9362	1790	0.016476	18.9378		1790	0.006076	18.9314
1791	0.0219074	18.9428	1791	0.016411	18.9445		1791	0.006074	18.938
1792	0.022083	18.9497	1792	0.016354	18.9514		1792	0.006084	18.9447
1793	0.0222726	18.9563	1793	0.016331	18.958		1793	0.006091	18.9513
1794	0.0224118	18.963	1794	0.01631	18.9646		1794	0.006098	18.9582
1795	0.0225841	18.9696	1795	0.01627	18.9713		1795	0.006104	18.9648
1796	0.0227185	18.9763	1796	0.016226	18.9779		1796	0.006103	18.9715
1797	0.0228641	18.9829	1797	0.016176	18.9845		1797	0.006098	18.9781
1798	0.0230277	18.9895	1798	0.016126	18.9912		1798	0.006087	18.9847
1799	0.0231888	18.9962	1799	0.016099	18.9978		1799	0.006059	18.9914
1800	0.0233682	19.003	1800	0.016133	19.0047		1800	0.006031	18.998
1801	0.0235249	19.0097	1801	0.016198	19.0113		1801	0.006006	19.0046
1802	0.0236979	19.0163	1802	0.016237	19.0179		1802	0.005977	19.0115
1803	0.0238536	19.0229	1803	0.01624	19.0246		1803	0.005952	19.0181
1804	0.0240135	19.0296	1804	0.016217	19.0312		1804	0.005927	19.0248
1805	0.0241423	19.0362	1805	0.016203	19.0378		1805	0.005893	19.0314
1806	0.0242865	19.0428	1806	0.016207	19.0445		1806	0.005866	19.0381
1807	0.0244279	19.0495	1807	0.016229	19.0511		1807	0.005862	19.0447
1808	0.0245451	19.0564	1808	0.016247	19.058		1808	0.005862	19.0513
1809	0.0246661	19.063	1809	0.016226	19.0647		1809	0.005855	19.058
1810	0.0247627	19.0696	1810	0.016153	19.0713		1810	0.005846	19.0648
1811	0.0249119	19.0763	1811	0.016044	19.0779		1811	0.005835	19.0715
1812	0.0250449	19.0829	1812	0.015961	19.0846		1812	0.005826	19.0781
1813	0.0251972	19.0895	1813	0.015901	19.0912		1813	0.005823	19.0847
1814	0.025349	19.0962	1814	0.015873	19.0978		1814	0.005829	19.0914
1815	0.0255059	19.1028	1815	0.015859	19.1045		1815	0.005844	19.098
1816	0.0256399	19.1097	1816	0.015838	19.1113		1816	0.005841	19.1047
1817	0.0257657	19.1163	1817	0.015808	19.118		1817	0.005815	19.1113
1818	0.0259289	19.1229	1818	0.015792	19.1246		1818	0.005813	19.1182
1819	0.0260812	19.1296	1819	0.015797	19.1312		1819	0.005821	19.1248
1820	0.026245	19.1362	1820	0.015774	19.1379		1820	0.005822	19.1314
1821	0.0263559	19.1429	1821	0.015786	19.1445		1821	0.005821	19.1381
1822	0.0265144	19.1495	1822	0.015808	19.1511		1822	0.00582	19.1447
1823	0.0266627	19.1562	1823	0.01581	19.1578		1823	0.005815	19.1514
1824	0.0268064	19.163	1824	0.015773	19.1647		1824	0.005804	19.158
1825	0.026943	19.1697	1825	0.01571	19.1713		1825	0.005787	19.1646
1826	0.0270883	19.1763	1826	0.015647	19.1779		1826	0.005786	19.1715
1827	0.0272429	19.1829	1827	0.015592	19.1846		1827	0.00578	19.1781
1828	0.0273607	19.1896	1828	0.015532	19.1912		1828	0.005749	19.1848
1829	0.0275386	19.1962	1829	0.0155	19.1978		1829	0.005725	19.1914
1830	0.0277027	19.2028	1830	0.015498	19.2045		1830	0.005712	19.198
1831	0.0278816	19.2095	1831	0.01552	19.2111		1831	0.005708	19.2047
1832	0.028016	19.2163	1832	0.015544	19.218		1832	0.00571	19.2113
1833	0.0281675	19.223	1833	0.015554	19.2246		1833	0.005712	19.218
1834	0.0283368	19.2296	1834	0.015581	19.2312		1834	0.00571	19.2248
1835	0.0285162	19.2363	1835	0.015612	19.2379		1835	0.005717	19.2315
1836	0.0287026	19.2429	1836	0.015575	19.2445		1836	0.005731	19.2381
1837	0.0288618	19.2495	1837	0.015528	19.2512		1837	0.005752	19.2447
1838	0.0290173	19.2562	1838	0.015574	19.2578		1838	0.005762	19.2514
1839	0.0291116	19.2628	1839	0.015601	19.2644		1839	0.00576	19.258
1840	0.029222	19.2697	1840	0.0156	19.2713		1840	0.005758	19.2646
1841	0.0293201	19.2763	1841	0.015563	19.278		1841	0.005755	19.2713
1842	0.0294191	19.283	1842	0.015518	19.2846		1842	0.005746	19.2781
1843	0.0294938	19.2896	1843	0.015489	19.2912		1843	0.005735	19.2848
1844	0.029556	19.2962	1844	0.015473	19.2979		1844	0.005731	19.2914
1845	0.0296145	19.3029	1845	0.015456	19.3045		1845	0.005708	19.298
1846	0.029655	19.3095	1846	0.015502	19.3111		1846	0.005677	19.3047
1847	0.0297079	19.3161	1847	0.015609	19.3178		1847	0.005666	19.3113
1848	0.0297592	19.323	1848	0.015626	19.3246		1848	0.005671	19.318
1849	0.0297903	19.3296	1849	0.015616	19.3313		1849	0.005681	19.3246
1850	0.0298048	19.3363	1850	0.015621	19.3379		1850	0.005689	19.3315
1851	0.0297889	19.3429	1851	0.015633	19.3446		1851	0.005692	19.3381
1852	0.0297589	19.3495	1852	0.015631	19.3512		1852	0.005693	19.3447
1853	0.0297006	19.3562	1853	0.015633	19.3578		1853	0.005697	19.3514
1854	0.0296151	19.3628	1854	0.01569	19.3645		1854	0.005708	19.358
1855	0.0295253	19.3695	1855	0.015765	19.3711		1855	0.005737	19.3647
1856	0.0294371	19.3763	1856	0.015769	19.378		1856	0.005758	19.3713
1857	0.0293364	19.383	1857	0.015701	19.3846		1857	0.005759	19.3779
1858	0.0291536	19.3896	1858	0.015638	19.3912		1858	0.005753	19.3848
1859	0.0289893	19.3962	1859	0.015603	19.3979		1859	0.005744	19.3914
1860	0.0288124	19.4029	1860	0.015592	19.4045		1860	0.005726	19.3981
1861	0.0286586	19.4095	1861	0.015611	19.4112		1861	0.005695	19.4047
1862	0.0284783	19.4161	1862	0.01564	19.4178		1862	0.005668	19.4113
1863	0.0282879	19.4228	1863	0.015659	19.4244		1863	0.005644	19.418
1864	0.0281009	19.4296	1864	0.015627	19.4313		1864	0.005613	19.4246
1865	0.0278445	19.4363	1865	0.015584	19.4379		1865	0.005595	19.4313
1866	0.0275834	19.4429	1866	0.015611	19.4446		1866	0.005587	19.4381
1867	0.0272208	19.4496	1867	0.015675	19.4512		1867	0.005571	19.4448
1868	0.0269404	19.4562	1868	0.015741	19.4579		1868	0.00555	19.4514
1869	0.026638	19.4628	1869	0.015781	19.4645		1869	0.005538	19.458
1870	0.0263385	19.4695	1870	0.015785	19.4711		1870	0.005543	19.4647
1871	0.0259973	19.4761	1871	0.01577	19.4777		1871	0.005563	19.4713
1872	0.025633	19.483	1872	0.015772	19.4846		1872	0.005571	19.478
1873	0.0252846	19.4896	1873	0.015776	19.4913		1873	0.005575	19.4846
1874	0.0248618	19.4963	1874	0.015771	19.4979		1874	0.005577	19.4915
1875	0.0245064	19.5029	1875	0.015777	19.5045		1875	0.005566	19.4981
1876	0.0240767	19.5095	1876	0.015774	19.5112		1876	0.00555	19.5048
1877	0.0237454	19.5162	1877	0.015742	19.5178		1877	0.005541	19.5114
1878	0.0233593	19.5228	1878	0.01572	19.5244		1878	0.005534	19.518
1879	0.022971	19.5294	1879	0.015738	19.5311		1879	0.00551	19.5247
1880	0.0225537	19.5363	1880	0.01577	19.5379		1880	0.005476	19.5313
1881	0.0221292	19.543	1881	0.015771	19.5446		1881	0.00547	19.5379
1882	0.0217403	19.5496	1882	0.015754	19.5512		1882	0.005477	19.5448
1883	0.0212766	19.5562	1883	0.015733	19.5578		1883	0.005489	19.5514
1884	0.0209063	19.5629	1884	0.01572	19.5645		1884	0.005506	19.5581
1885	0.0204404	19.5695	1885	0.015717	19.5711		1885	0.005522	19.5647
1886	0.0200426	19.5761	1886	0.015727	19.5778		1886	0.005537	19.5713
1887	0.0196413	19.5828	1887	0.015733	19.5844		1887	0.005552	19.578
1888	0.0192915	19.5896	1888	0.015712	19.5913		1888	0.00556	19.5846
1889	0.0189069	19.5963	1889	0.015667	19.5979		1889	0.005579	19.5912
1890	0.0184777	19.6029	1890	0.015621	19.6046		1890	0.005599	19.5981
1891	0.0180866	19.6096	1891	0.015603	19.6112		1891	0.005591	19.6047
1892	0.0176473	19.6162	1892	0.015585	19.6178		1892	0.0056	19.6114
1893	0.0173032	19.6228	1893	0.01557	19.6245		1893	0.005611	19.618
1894	0.0169203	19.6295	1894	0.015577	19.6311		1894	0.005608	19.6247
1895	0.0166296	19.6361	1895	0.015579	19.6378		1895	0.005586	19.6313
1896	0.0163053	19.643	1896	0.015571	19.6446		1896	0.005569	19.6379
1897	0.0159708	19.6496	1897	0.015569	19.6512		1897	0.005575	19.6446
1898	0.0156087	19.6562	1898	0.015568	19.6579		1898	0.00559	19.6514
1899	0.0152682	19.6629	1899	0.015563	19.6645		1899	0.005587	19.6581
1900	0.0149997	19.6695	1900	0.015566	19.6712		1900	0.005581	19.6647
1901	0.0147059	19.6762	1901	0.015565	19.6778		1901	0.005584	19.6713
1902	0.0144843	19.6828	1902	0.015564	19.6844		1902	0.005577	19.678
1903	0.0142189	19.6894	1903	0.015551	19.6911		1903	0.005556	19.6846
1904	0.0139924	19.6963	1904	0.015515	19.6979		1904	0.005527	19.6913
1905	0.0137381	19.7029	1905	0.015489	19.7046		1905	0.005519	19.6979
1906	0.0135135	19.7096	1906	0.015476	19.7112		1906	0.00551	19.7048
1907	0.0132803	19.7162	1907	0.01546	19.7178		1907	0.005482	19.7114
1908	0.0130523	19.7229	1908	0.015438	19.7245		1908	0.005486	19.7181
1909	0.0128568	19.7295	1909	0.015425	19.7311		1909	0.005519	19.7247
1910	0.0126517	19.7361	1910	0.015421	19.7377		1910	0.005543	19.7313
1911	0.0124872	19.7428	1911	0.01542	19.7444		1911	0.005543	19.738
1912	0.012297	19.7496	1912	0.015401	19.7512		1912	0.005537	19.7446
1913	0.0121505	19.7563	1913	0.015392	19.7579		1913	0.005541	19.7512
1914	0.0119759	19.7629	1914	0.015394	19.7645		1914	0.005564	19.7581
1915	0.0118256	19.7695	1915	0.015392	19.7712		1915	0.005568	19.7647
1916	0.0116716	19.7762	1916	0.015363	19.7778		1916	0.00557	19.7714
1917	0.0115326	19.7828	1917	0.015308	19.7844		1917	0.005578	19.778
1918	0.0114119	19.7894	1918	0.015275	19.7911		1918	0.005556	19.7846
1919	0.0112807	19.7961	1919	0.015299	19.7977		1919	0.005514	19.7913
1920	0.0111699	19.8029	1920	0.015316	19.8046		1920	0.005477	19.7979
1921	0.0110462	19.8096	1921	0.015307	19.8112		1921	0.005459	19.8046
1922	0.0109483	19.8162	1922	0.015315	19.8179		1922	0.005455	19.8114
1923	0.0108273	19.8229	1923	0.015336	19.8245		1923	0.005446	19.8181
1924	0.0107278	19.8295	1924	0.015351	19.8312		1924	0.005427	19.8247
1925	0.0106485	19.8361	1925	0.01535	19.8378		1925	0.005427	19.8313
1926	0.010596	19.8428	1926	0.015355	19.8444		1926	0.00542	19.838
1927	0.0105377	19.8494	1927	0.015392	19.8511		1927	0.005403	19.8446
1928	0.0104402	19.8563	1928	0.015412	19.8579		1928	0.005384	19.8513
1929	0.0103591	19.8629	1929	0.015374	19.8646		1929	0.005373	19.8579
1930	0.0102449	19.8695	1930	0.015335	19.8712		1930	0.005377	19.8648
1931	0.0101441	19.8762	1931	0.015322	19.8778		1931	0.005394	19.8714
1932	0.0100324	19.8828	1932	0.015313	19.8845		1932	0.005395	19.878
1933	0.00994107	19.8895	1933	0.015296	19.8911		1933	0.00538	19.8847
1934	0.00985986	19.8961	1934	0.015267	19.8977		1934	0.005374	19.8913
1935	0.00976822	19.9027	1935	0.015236	19.9044		1935	0.005381	19.898
1936	0.0096693	19.9096	1936	0.015225	19.9112		1936	0.005398	19.9046
1937	0.00959829	19.9163	1937	0.015248	19.9179		1937	0.00541	19.9112
1938	0.00957006	19.9229	1938	0.015276	19.9245		1938	0.005418	19.9181
1939	0.00949951	19.9295	1939	0.015275	19.9311		1939	0.005423	19.9247
1940	0.00946291	19.9362	1940	0.015272	19.9378		1940	0.005414	19.9314
1941	0.00941657	19.9428	1941	0.015265	19.9444		1941	0.005386	19.938
1942	0.00937878	19.9494	1942	0.015253	19.9511		1942	0.005357	19.9446
1943	0.00934804	19.9561	1943	0.015246	19.9577		1943	0.005346	19.9513
1944	0.00931686	19.9629	1944	0.015254	19.9646		1944	0.005336	19.9579
1945	0.00927378	19.9696	1945	0.015269	19.9712		1945	0.005316	19.9645
1946	0.00920859	19.9762	1946	0.01526	19.9778		1946	0.005302	19.9714
1947	0.00913067	19.9829	1947	0.015218	19.9845		1947	0.005303	19.978
1948	0.00905026	19.9895	1948	0.015165	19.9911		1948	0.005305	19.9847
1949	0.00901287	19.9961	1949	0.015141	19.9978		1949	0.005303	19.9913
							1950	0.005311	19.998

## Sheet: Extended Data Fig. 1c
Conc1 [M]	3e-06		Conc1	3e-06
Time1	V6R	V6R_Fit	Time1	WT	WT_Fit
240	0.02438756	0	240	0.05057926	0
240.2	0.02633281	0.00024589	240.2	0.06016854	0.00763456
240.4	0.02784285	0.00049152	240.4	0.07128346	0.0152249
240.6	0.02933954	0.00073689	240.6	0.08401888	0.02277127
240.8	0.03076239	0.00098199	240.8	0.097961	0.03027393
241	0.03223889	0.00122683	241	0.11274362	0.03773312
241.2	0.03368553	0.00147141	241.2	0.12850467	0.0451491
241.4	0.03499499	0.00171573	241.4	0.14460347	0.05252212
241.6	0.03588759	0.00195979	241.6	0.16124745	0.05985243
241.8	0.03683405	0.00220359	241.8	0.17747263	0.06714028
242	0.03681229	0.00244713	242	0.19215816	0.07438591
242.2	0.0360755	0.0026904	242.2	0.20548862	0.08158956
242.4	0.03590927	0.00293342	242.4	0.21813218	0.08875149
242.6	0.03582225	0.00317618	242.6	0.23047939	0.09587193
242.8	0.03609378	0.00341868	242.8	0.24211737	0.10295112
243	0.03621883	0.00366092	243	0.25371019	0.1099893
243.2	0.03626406	0.0039029	243.2	0.26442937	0.11698671
243.4	0.03653381	0.00414463	243.4	0.27540579	0.12394358
243.6	0.03732481	0.00438609	243.6	0.28621568	0.13086016
243.8	0.0380112	0.0046273	243.8	0.29665407	0.13773667
244	0.03829978	0.00486825	244	0.30682318	0.14457334
244.2	0.03849309	0.00510894	244.2	0.31643645	0.15137041
244.4	0.0385495	0.00534938	244.4	0.32601506	0.1581281
244.6	0.03912088	0.00558955	244.6	0.33571348	0.16484665
244.8	0.03956693	0.00582948	244.8	0.34467613	0.17152628
245	0.03998212	0.00606914	245	0.3532003	0.17816721
245.2	0.04015178	0.00630855	245.2	0.36165659	0.18476968
245.4	0.04033562	0.00654771	245.4	0.37052639	0.19133389
245.6	0.04036818	0.00678661	245.6	0.37881993	0.19786008
245.8	0.04057393	0.00702525	245.8	0.3868847	0.20434847
246	0.03932355	0.00726364	246	0.39383538	0.21079927
246.2	0.0392135	0.00750177	246.2	0.40108957	0.2172127
246.4	0.03930991	0.00773965	246.4	0.40827855	0.22358898
246.6	0.03909797	0.00797728	246.6	0.41481317	0.22992832
246.8	0.03895333	0.00821465	246.8	0.42124215	0.23623094
247	0.03915743	0.00845177	247	0.42864759	0.24249705
247.2	0.03935232	0.00868864	247.2	0.43564669	0.24872685
247.4	0.03919176	0.00892525	247.4	0.44256767	0.25492057
247.6	0.0392396	0.00916161	247.6	0.44900078	0.26107842
247.8	0.03920748	0.00939772	247.8	0.4555097	0.26720059
248	0.03876273	0.00963357	248	0.46161094	0.27328729
248.2	0.03958998	0.00986918	248.2	0.46828955	0.27933873
248.4	0.03953143	0.01010453	248.4	0.4743972	0.28535512
248.6	0.04041953	0.01033963	248.6	0.48126116	0.29133666
248.8	0.04026902	0.01057448	248.8	0.48701136	0.29728355
249	0.0404769	0.01080908	249	0.49248183	0.30319599
249.2	0.04027297	0.01104343	249.2	0.49769606	0.30907417
249.4	0.04024493	0.01127753	249.4	0.50358559	0.31491831
249.6	0.04022755	0.01151138	249.6	0.50854067	0.32072859
249.8	0.0404293	0.01174497	249.8	0.51412207	0.32650522
250	0.03981584	0.01197832	250	0.51889621	0.33224838
250.2	0.04034706	0.01221142	250.2	0.52401399	0.33795827
250.4	0.03996037	0.01244428	250.4	0.52867978	0.34363508
250.6	0.0406245	0.01267688	250.6	0.53406977	0.34927901
250.8	0.04150353	0.01290923	250.8	0.53943128	0.35489024
251	0.04205915	0.01314134	251	0.54440331	0.36046897
251.2	0.04213865	0.0133732	251.2	0.54907701	0.36601538
251.4	0.04198653	0.01360481	251.4	0.55355921	0.37152967
251.6	0.04228621	0.01383617	251.6	0.55799541	0.37701201
251.8	0.04258087	0.01406729	251.8	0.56243739	0.38246259
252	0.04299612	0.01429816	252	0.56681734	0.38788159
252.2	0.04351848	0.01452878	252.2	0.57105512	0.39326921
252.4	0.04369076	0.01475916	252.4	0.57557314	0.39862561
252.6	0.04423889	0.01498929	252.6	0.58031618	0.40395099
252.8	0.04368702	0.01521917	252.8	0.58355749	0.40924551
253	0.04364918	0.01544881	253	0.58724502	0.41450937
253.2	0.04319183	0.0156782	253.2	0.59078262	0.41974273
253.4	0.0428277	0.01590735	253.4	0.59478199	0.42494578
253.6	0.0423343	0.01613626	253.6	0.59817441	0.43011868
253.8	0.04234147	0.01636492	253.8	0.6020148	0.43526162
254	0.04201442	0.01659333	254	0.60530357	0.44037477
254.2	0.04215487	0.01682151	254.2	0.6090026	0.4454583
254.4	0.0421586	0.01704944	254.4	0.61244045	0.45051238
254.6	0.0434152	0.01727712	254.6	0.61689805	0.45553718
254.8	0.04389334	0.01750456	254.8	0.62054233	0.46053287
255	0.04429154	0.01773176	255	0.62408735	0.46549963
255.2	0.0447257	0.01795872	255.2	0.62834732	0.47043761
255.4	0.04520075	0.01818543	255.4	0.63237492	0.47534699
255.6	0.0452572	0.0184119	255.6	0.63534646	0.48022793
255.8	0.04587839	0.01863813	255.8	0.63899449	0.48508059
256	0.04623057	0.01886412	256	0.64279704	0.48990514
256.2	0.04588841	0.01908987	256.2	0.64635264	0.49470175
256.4	0.04555217	0.01931538	256.4	0.65023594	0.49947056
256.6	0.04518072	0.01954064	256.6	0.65361041	0.50421176
256.8	0.04473113	0.01976567	256.8	0.65625394	0.50892548
257	0.04482478	0.01999045	257	0.66012832	0.51361191
257.2	0.04435378	0.020215	257.2	0.6628307	0.51827118
257.4	0.04414571	0.0204393	257.4	0.66641675	0.52290346
257.6	0.04410295	0.02066337	257.6	0.66947437	0.52750891
257.8	0.04438018	0.02088719	257.8	0.67231848	0.53208768
258	0.04453581	0.02111078	258	0.67534371	0.53663993
258.2	0.04469918	0.02133413	258.2	0.67820631	0.54116581
258.4	0.04527191	0.02155724	258.4	0.68121793	0.54566546
258.6	0.04617391	0.02178011	258.6	0.68459239	0.55013905
258.8	0.0468556	0.02200274	258.8	0.68740403	0.55458673
259	0.04724491	0.02222514	259	0.68992791	0.55900864
259.2	0.04748036	0.0224473	259.2	0.69233823	0.56340494
259.4	0.04739401	0.02266922	259.4	0.69463916	0.56777577
259.6	0.04751619	0.0228909	259.6	0.69670657	0.57212128
259.8	0.04758362	0.02311235	259.8	0.70023919	0.57644161
260	0.04729018	0.02333356	260	0.70291538	0.58073692
260.2	0.04723185	0.02355453	260.2	0.70600504	0.58500735
260.4	0.0471089	0.02377527	260.4	0.70866299	0.58925304
260.6	0.04717786	0.02399578	260.6	0.71099217	0.59347413
260.8	0.04734342	0.02421604	260.8	0.71359792	0.59767078
261	0.0477871	0.02443608	261	0.71720005	0.60184311
261.2	0.04771438	0.02465587	261.2	0.71932227	0.60599127
261.4	0.04777845	0.02487544	261.4	0.72215173	0.6101154
261.6	0.04735594	0.02509476	261.6	0.72424841	0.61421564
261.8	0.04786291	0.02531386	261.8	0.7267945	0.61829213
262	0.04783091	0.02553272	262	0.72932616	0.622345
262.2	0.04774846	0.02575134	262.2	0.73161289	0.6263744
262.4	0.04769305	0.02596974	262.4	0.73423425	0.63038046
262.6	0.04751918	0.0261879	262.6	0.73671651	0.6343633
262.8	0.04764505	0.02640582	262.8	0.73890036	0.63832308
263	0.04744526	0.02662352	263	0.74070837	0.64225992
263.2	0.04787576	0.02684098	263.2	0.74330207	0.64617395
263.4	0.04814191	0.02705821	263.4	0.74628734	0.65006531
263.6	0.04868813	0.02727521	263.6	0.74936607	0.65393412
263.8	0.04876052	0.02749197	263.8	0.75222655	0.65778053
264	0.04962544	0.02770851	264	0.75489652	0.66160465
264.2	0.04988168	0.02792481	264.2	0.75738756	0.66540662
264.4	0.04984892	0.02814088	264.4	0.7593125	0.66918657
264.6	0.05045057	0.02835672	264.6	0.76184816	0.67294462
264.8	0.05144162	0.02857233	264.8	0.76529451	0.6766809
265	0.05208924	0.02878771	265	0.76785063	0.68039553
265.2	0.05261758	0.02900286	265.2	0.76975986	0.68408865
265.4	0.05263413	0.02921778	265.4	0.77175987	0.68776037
265.6	0.05269891	0.02943248	265.6	0.77386875	0.69141082
265.8	0.05318787	0.02964694	265.8	0.77592401	0.69504013
266	0.05235383	0.02986117	266	0.77768858	0.69864841
266.2	0.05179549	0.03007518	266.2	0.77990554	0.70223579
266.4	0.05167635	0.03028895	266.4	0.78192124	0.70580239
266.6	0.05167348	0.0305025	266.6	0.78419749	0.70934833
266.8	0.05171503	0.03071582	266.8	0.78612479	0.71287373
267	0.05200608	0.03092891	267	0.78798775	0.7163787
267.2	0.05205838	0.03114177	267.2	0.79048331	0.71986337
267.4	0.05230389	0.03135441	267.4	0.79274958	0.72332786
267.6	0.05256763	0.03156682	267.6	0.79518325	0.72677227
267.8	0.05197026	0.031779	267.8	0.79651624	0.73019674
268	0.05182963	0.03199096	268	0.79830749	0.73360136
268.2	0.05140215	0.03220269	268.2	0.7999217	0.73698626
268.4	0.0520468	0.03241419	268.4	0.802291	0.74035156
268.6	0.05230018	0.03262547	268.6	0.8046835	0.74369736
268.8	0.05293613	0.03283653	268.8	0.80739102	0.74702377
269	0.05340164	0.03304735	269	0.80932306	0.75033092
269.2	0.05332877	0.03325795	269.2	0.81096038	0.75361891
269.4	0.0532581	0.03346833	269.4	0.81256949	0.75688785
269.6	0.05341469	0.03367848	269.6	0.81431886	0.76013786
269.8	0.05340198	0.03388841	269.8	0.81640114	0.76336904
270	0.05347715	0.03409812	270	0.81907101	0.7665815
270.2	0.05375323	0.0343076	270.2	0.82169664	0.76977535
270.4	0.05470141	0.03451685	270.4	0.82421999	0.7729507
270.6	0.05510395	0.03472589	270.6	0.82646392	0.77610766
270.8	0.05629424	0.0349347	270.8	0.82928112	0.77924633
271	0.05683795	0.03514328	271	0.83133156	0.78236681
271.2	0.05665109	0.03535165	271.2	0.83341876	0.78546922
271.4	0.05664097	0.03555979	271.4	0.83510437	0.78855366
271.6	0.05642197	0.03576771	271.6	0.83679312	0.79162023
271.8	0.05621066	0.0359754	271.8	0.83827173	0.79466904
272	0.0563429	0.03618288	272	0.84017433	0.79770018
272.2	0.05601211	0.03639013	272.2	0.84161917	0.80071377
272.4	0.05600862	0.03659717	272.4	0.8436123	0.8037099
272.6	0.05546486	0.03680398	272.6	0.84496292	0.80668867
272.8	0.05522579	0.03701057	272.8	0.84674304	0.80965018
273	0.05516128	0.03721694	273	0.84777523	0.81259455
273.2	0.05434236	0.03742309	273.2	0.84859911	0.81552185
273.4	0.0545311	0.03762902	273.4	0.85004421	0.8184322
273.6	0.05470863	0.03783473	273.6	0.85149502	0.82132568
273.8	0.05452313	0.03804022	273.8	0.85333101	0.82420241
274	0.05487662	0.03824549	274	0.85498892	0.82706247
274.2	0.0556158	0.03845054	274.2	0.8568165	0.82990596
274.4	0.05614587	0.03865537	274.4	0.85854801	0.83273299
274.6	0.05645692	0.03885998	274.6	0.86012826	0.83554363
274.8	0.05713352	0.03906438	274.8	0.86226216	0.83833799
275	0.05682114	0.03926856	275	0.86322239	0.84111617
275.2	0.05665851	0.03947252	275.2	0.86451501	0.84387825
275.4	0.05703751	0.03967626	275.4	0.86604732	0.84662433
275.6	0.05745272	0.03987978	275.6	0.86793619	0.84935451
275.8	0.05759287	0.04008309	275.8	0.86978258	0.85206887
276	0.05729394	0.04028618	276	0.87142922	0.8547675
276.2	0.0571321	0.04048905	276.2	0.87321266	0.8574505
276.4	0.05722219	0.0406917	276.4	0.87570664	0.86011796
276.6	0.05647747	0.04089414	276.6	0.87687624	0.86276997
276.8	0.05577304	0.04109637	276.8	0.87825839	0.86540661
277	0.05594306	0.04129837	277	0.8798098	0.86802798
277.2	0.05522628	0.04150016	277.2	0.88100112	0.87063417
277.4	0.05541382	0.04170174	277.4	0.88265302	0.87322526
277.6	0.0556785	0.0419031	277.6	0.88403479	0.87580133
277.8	0.05573957	0.04210425	277.8	0.88576796	0.87836249
278	0.0558592	0.04230518	278	0.88715395	0.88090881
278.2	0.05608818	0.04250589	278.2	0.88901613	0.88344038
278.4	0.05620277	0.0427064	278.4	0.89081591	0.88595728
278.6	0.05636081	0.04290668	278.6	0.89217909	0.8884596
278.8	0.0573065	0.04310676	278.8	0.89380211	0.89094743
279	0.05783131	0.04330662	279	0.89530878	0.89342084
279.2	0.05863405	0.04350626	279.2	0.89673835	0.89587993
279.4	0.05942766	0.0437057	279.4	0.89862697	0.89832477
279.6	0.06009339	0.04390492	279.6	0.90039657	0.90075545
279.8	0.06075448	0.04410393	279.8	0.90173198	0.90317205
280	0.06081085	0.04430272	280	0.9028871	0.90557465
280.2	0.06168544	0.04450131	280.2	0.90495684	0.90796333
280.4	0.06159121	0.04469968	280.4	0.90645719	0.91033818
280.6	0.06095131	0.04489784	280.6	0.90706588	0.91269927
280.8	0.06078677	0.04509578	280.8	0.90822482	0.91504668
281	0.06137317	0.04529352	281	0.9098071	0.91738049
281.2	0.06101884	0.04549105	281.2	0.91106096	0.91970078
281.4	0.06074381	0.04568836	281.4	0.91254465	0.92200763
281.6	0.0603041	0.04588546	281.6	0.9136252	0.92430112
281.8	0.05976878	0.04608236	281.8	0.91494863	0.92658132
282	0.05951944	0.04627904	282	0.91634274	0.92884831
282.2	0.05963437	0.04647551	282.2	0.91806926	0.93110217
282.4	0.05957076	0.04667178	282.4	0.91988492	0.93334298
282.6	0.05977042	0.04686783	282.6	0.92162484	0.9355708
282.8	0.06041318	0.04706367	282.8	0.92307962	0.93778572
283	0.06034513	0.04725931	283	0.924303	0.93998781
283.2	0.06081173	0.04745473	283.2	0.9257067	0.94217714
283.4	0.06155883	0.04764995	283.4	0.92722222	0.94435379
283.6	0.06184248	0.04784496	283.6	0.92853078	0.94651783
283.8	0.06220895	0.04803976	283.8	0.92957165	0.94866933
284	0.06243091	0.04823435	284	0.93073242	0.95080837
284.2	0.06286805	0.04842874	284.2	0.93181042	0.95293502
284.4	0.06239965	0.04862292	284.4	0.93241992	0.95504935
284.6	0.0622117	0.04881689	284.6	0.93372067	0.95715143
284.8	0.06241833	0.04901065	284.8	0.93544139	0.95924133
285	0.06251529	0.04920421	285	0.93688631	0.96131913
285.2	0.06179334	0.04939756	285.2	0.93817077	0.96338489
285.4	0.06125148	0.0495907	285.4	0.93870842	0.96543868
285.6	0.06147159	0.04978364	285.6	0.93989608	0.96748058
285.8	0.06153133	0.04997637	285.8	0.94160773	0.96951065
286	0.06181705	0.05016889	286	0.94361943	0.97152896
286.2	0.06205295	0.05036121	286.2	0.945519	0.97353558
286.4	0.0620317	0.05055332	286.4	0.94717787	0.97553057
286.6	0.06227393	0.05074523	286.6	0.94893886	0.977514
286.8	0.06254485	0.05093694	286.8	0.95004251	0.97948595
287	0.06262943	0.05112844	287	0.95131757	0.98144647
287.2	0.06331106	0.05131973	287.2	0.95319226	0.98339564
287.4	0.06421953	0.05151082	287.4	0.95476537	0.98533351
287.6	0.06391007	0.05170171	287.6	0.95596192	0.98726016
287.8	0.06463057	0.05189239	287.8	0.95731677	0.98917565
288	0.06454754	0.05208287	288	0.95775499	0.99108004
288.2	0.06474314	0.05227314	288.2	0.95883809	0.9929734
288.4	0.06501235	0.05246322	288.4	0.9602736	0.99485579
288.6	0.0654705	0.05265308	288.6	0.96236724	0.99672728
288.8	0.06571401	0.05284275	288.8	0.96373713	0.99858793
289	0.06593334	0.05303222	289	0.96519262	100043779
289.2	0.06637208	0.05322148	289.2	0.96672559	100227695
289.4	0.06665111	0.05341054	289.4	0.96775611	100410544
289.6	0.06707907	0.05359939	289.6	0.96965231	100592335
289.8	0.06671682	0.05378805	289.8	0.970598	100773072
290	0.06641983	0.0539765	290	0.97162206	100952763
290.2	0.06679427	0.05416476	290.2	0.97312604	101131412
290.4	0.06669287	0.05435281	290.4	0.97423618	101309027
290.6	0.06665744	0.05454066	290.6	0.97574674	101485613
290.8	0.06671873	0.05472831	290.8	0.97660593	101661175
291	0.06647573	0.05491576	291	0.97742856	101835721
291.2	0.06690515	0.05510301	291.2	0.9785144	102009256
291.4	0.06689925	0.05529006	291.4	0.97916087	102181785
291.6	0.06694419	0.05547691	291.6	0.98001193	102353315
291.8	0.06694892	0.05566357	291.8	0.98108415	102523851
292	0.06694368	0.05585002	292	0.98183298	1026934
292.2	0.06706749	0.05603627	292.2	0.98307661	102861966
292.4	0.06720646	0.05622232	292.4	0.98375194	103029556
292.6	0.06713537	0.05640818	292.6	0.98530485	103196175
292.8	0.06742726	0.05659384	292.8	0.98630051	103361828
293	0.06784306	0.0567793	293	0.9877127	103526522
293.2	0.06770936	0.05696456	293.2	0.98881047	103690262
293.4	0.06780554	0.05714962	293.4	0.98979558	103853054
293.6	0.06767318	0.05733448	293.6	0.9910695	104014902
293.8	0.06774117	0.05751915	293.8	0.99191406	104175813
294	0.06746382	0.05770362	294	0.99293603	104335792
294.2	0.068004	0.05788789	294.2	0.9944914	104494844
294.4	0.06784793	0.05807197	294.4	0.99535437	104652975
294.6	0.06760005	0.05825585	294.6	0.99630381	10481019
294.8	0.06738368	0.05843954	294.8	0.99664328	104966493
295	0.06763055	0.05862302	295	0.99777071	105121892
295.2	0.0683032	0.05880631	295.2	0.99922115	10527639
295.4	0.06850234	0.05898941	295.4	100044498	105429993
295.6	0.06891108	0.05917231	295.6	100235553	105582707
295.8	0.06885967	0.05935502	295.8	100339368	105734536
296	0.06932533	0.05953753	296	100424325	105885485
296.2	0.0689426	0.05971984	296.2	10047878	10603556
296.4	0.06920077	0.05990196	296.4	100596584	106184765
296.6	0.06937716	0.06008389	296.6	100757646	106333107
296.8	0.06956733	0.06026562	296.8	100863245	106480588
297	0.06981788	0.06044716	297	101009244	106627216
297.2	0.07016819	0.0606285	297.2	101210304	106772994
297.4	0.07045739	0.06080965	297.4	101346967	106917928
297.6	0.07046069	0.06099061	297.6	101495636	107062022
297.8	0.07078728	0.06117137	297.8	101632491	107205281
298	0.07160555	0.06135194	298	101782301	10734771
298.2	0.07222398	0.06153232	298.2	101926007	107489315
298.4	0.07238633	0.0617125	298.4	102012316	107630099
298.6	0.07271696	0.0618925	298.6	102103742	107770067
298.8	0.07301327	0.0620723	298.8	102165678	107909225
299	0.07359931	0.06225191	299	102300284	108047577
299.2	0.07366078	0.06243132	299.2	102393621	108185127
299.4	0.07369562	0.06261055	299.4	102483072	10832188
299.6	0.07341274	0.06278958	299.6	102528149	108457841
299.8	0.07322506	0.06296842	299.8	102565666	108593015
300	0.07336826	0.06314708	300	102622675	108727405
300.2	0.07289688	0.06332554	300.2	102704631	108861017
300.4	0.07316152	0.06350381	300.4	102809574	108993855
300.6	0.07296582	0.06368189	300.6	10283868	109125924
300.8	0.07232597	0.06385978	300.8	10291184	109257227
301	0.07265451	0.06403748	301	103055738	10938777
301.2	0.07254326	0.06421499	301.2	103189131	109517556
301.4	0.07241143	0.06439231	301.4	10323463	109646591
301.6	0.0729656	0.06456944	301.6	103401142	109774878
301.8	0.07326114	0.06474638	301.8	103519827	109902422
302	0.07412405	0.06492313	302	103662543	110029228
302.2	0.07419762	0.0650997	302.2	103751017	110155298
302.4	0.07430783	0.06527607	302.4	103828895	110280639
302.6	0.07503875	0.06545226	302.6	103939953	110405253
302.8	0.07513709	0.06562826	302.8	104000572	110529145
303	0.07533766	0.06580407	303	104104667	11065232
303.2	0.07509791	0.06597969	303.2	104217768	110774781
303.4	0.07495869	0.06615513	303.4	104334839	110896533
303.6	0.07465752	0.06633038	303.6	104388	11101758
303.8	0.0750607	0.06650544	303.8	104519984	111137925
304	0.07511699	0.06668031	304	104614883	111257573
304.2	0.0747996	0.066855	304.2	104725582	111376528
304.4	0.07461466	0.0670295	304.4	1047736	111494794
304.6	0.07427523	0.06720382	304.6	104844181	111612375
304.8	0.07468164	0.06737795	304.8	104956653	111729274
305	0.07489842	0.06755189	305	105007065	111845497
305.2	0.07522953	0.06772565	305.2	105112298	111961046
305.4	0.07527942	0.06789922	305.4	105146618	112075926
305.6	0.07546384	0.06807261	305.6	105248541	11219014
305.8	0.07512739	0.06824581	305.8	105273626	112303693
306	0.07558998	0.06841882	306	105368515	112416588
306.2	0.07607178	0.06859165	306.2	105454031	112528829
306.4	0.0762928	0.0687643	306.4	105556785	11264042
306.6	0.07695306	0.06893676	306.6	105693189	112751364
306.8	0.07658572	0.06910904	306.8	105746998	112861666
307	0.0759183	0.06928114	307	105832207	112971329
307.2	0.07573109	0.06945305	307.2	105895595	113080356
307.4	0.0750514	0.06962477	307.4	105948201	113188752
307.6	0.07512742	0.06979632	307.6	106025308	11329652
307.8	0.07463711	0.06996768	307.8	106161138	113403664
308	0.07404585	0.07013886	308	106208403	113510187
308.2	0.07414133	0.07030985	308.2	106302904	113616092
308.4	0.07383085	0.07048066	308.4	106332138	113721385
308.6	0.07449762	0.07065129	308.6	106464786	113826067
308.8	0.07539196	0.07082174	308.8	10656129	113930143
309	0.0757791	0.07099201	309	10665961	114033616
309.2	0.07699564	0.07116209	309.2	106851745	11413649
309.4	0.07700581	0.07133199	309.4	106927654	114238768
309.6	0.07764986	0.07150171	309.6	107089341	114340453
309.8	0.07848012	0.07167125	309.8	107251988	11444155
310	0.07929176	0.07184061	310	107372955	11454206
310.2	0.08017696	0.07200979	310.2	107536374	114641989
310.4	0.08091411	0.07217879	310.4	107685424	114741338
310.6	0.08048164	0.0723476	310.6	107745292	114840112
310.8	0.08046942	0.07251624	310.8	107845653	114938314
311	0.08054628	0.07268469	311	107938824	115035947
311.2	0.08089812	0.07285297	311.2	107979731	115133014
311.4	0.08035277	0.07302107	311.4	108044975	115229519
311.6	0.079729	0.07318898	311.6	108063349	115325465
311.8	0.07861586	0.07335672	311.8	108076238	115420856
312	0.07849743	0.07352428	312	108097374	115515693
312.2	0.07826213	0.07369166	312.2	108188586	115609981
312.4	0.07817199	0.07385886	312.4	108234377	115703723
312.6	0.07848405	0.07402588	312.6	108335417	115796922
312.8	0.07892562	0.07419273	312.8	108416069	115889582
313	0.07921709	0.07435939	313	108474619	115981704
313.2	0.07967883	0.07452588	313.2	108594952	116073293
313.4	0.0796327	0.07469219	313.4	108688832	116164351
313.6	0.08003131	0.07485832	313.6	108801173	116254881
313.8	0.0807347	0.07502428	313.8	108898481	116344888
314	0.08111739	0.07519006	314	108949762	116434372
314.2	0.08143277	0.07535566	314.2	109047547	116523339
314.4	0.08129759	0.07552108	314.4	109108862	11661179
314.6	0.08103464	0.07568633	314.6	109207615	116699729
314.8	0.08186654	0.0758514	314.8	109310647	116787158
315	0.08205474	0.0760163	315	109363361	116874081
315.2	0.08189768	0.07618102	315.2	109434915	1169605
315.4	0.08170182	0.07634556	315.4	109504837	117046419
315.6	0.08126516	0.07650993	315.6	109554774	11713184
315.8	0.08146594	0.07667412	315.8	109696078	117216766
316	0.08174389	0.07683813	316	109803768	1173012
316.2	0.08207677	0.07700197	316.2	109935447	117385145
316.4	0.08243434	0.07716564	316.4	110020825	117468604
316.6	0.08261651	0.07732913	316.6	110120225	117551579
316.8	0.08350551	0.07749245	316.8	110275769	117634074
317	0.0837328	0.07765559	317	110347382	11771609
317.2	0.08379479	0.07781856	317.2	110437756	117797632
317.4	0.08432749	0.07798135	317.4	110569575	117878701
317.6	0.08480262	0.07814397	317.6	110654039	117959301
317.8	0.08552188	0.07830642	317.8	110779576	118039434
318	0.08584923	0.07846869	318	110834232	118119102
318.2	0.08573867	0.07863079	318.2	110906852	118198309
318.4	0.08597565	0.07879272	318.4	111025237	118277057
318.6	0.08577327	0.07895447	318.6	111067538	118355349
318.8	0.08621403	0.07911606	318.8	111102861	118433188
319	0.08662588	0.07927746	319	111245028	118510575
319.2	0.0869839	0.0794387	319.2	11135876	118587515
319.4	0.08707674	0.07959976	319.4	111379603	118664008
319.6	0.08731332	0.07976066	319.6	111477239	118740059
319.8	0.08730116	0.07992138	319.8	111519372	118815669
320	0.08700508	0.08008193	320	111525753	11889084
320.2	0.08671235	0.0802423	320.2	111595358	118965577
320.4	0.08596948	0.08040251	320.4	111565983	11903988
320.6	0.08558143	0.08056254	320.6	111615748	119113753
320.8	0.08604314	0.08072241	320.8	11173151	119187199
321	0.08521026	0.0808821	321	111721286	119260218
321.2	0.08489334	0.08104162	321.2	111782635	119332815
321.4	0.08507945	0.08120098	321.4	111891341	119404991
321.6	0.08494112	0.08136016	321.6	111943894	119476749
321.8	0.08491962	0.08151917	321.8	112076751	119548091
322	0.08508747	0.08167801	322	1121161	11961902
322.2	0.084826	0.08183669	322.2	112210414	119689539
322.4	0.08544336	0.08199519	322.4	112366259	119759648
322.6	0.08514026	0.08215353	322.6	112420555	119829352
322.8	0.08617767	0.08231169	322.8	112547947	119898652
323	0.08625651	0.08246969	323	112633002	11996755
323.2	0.08642069	0.08262751	323.2	112646539	120036049
323.4	0.08651423	0.08278517	323.4	112698543	120104151
323.6	0.08713356	0.08294266	323.6	112783882	120171859
323.8	0.08676832	0.08309999	323.8	112758915	120239175
324	0.08656042	0.08325714	324	112774828	120306101
324.2	0.08670691	0.08341413	324.2	11284451	120372639
324.4	0.08662233	0.08357095	324.4	11287888	120438791
324.6	0.08684783	0.0837276	324.6	112985555	120504561
324.8	0.08748367	0.08388408	324.8	113062556	120569949
325	0.08701179	0.0840404	325	113107514	120634959
325.2	0.08700739	0.08419655	325.2	113199262	120699592
325.4	0.08681167	0.08435253	325.4	113268681	12076385
325.6	0.08700617	0.08450835	325.6	113339636	120827736
325.8	0.08731894	0.084664	325.8	113455858	120891253
326	0.08747244	0.08481949	326	1135226	120954401
326.2	0.08773963	0.0849748	326.2	113651943	121017183
326.4	0.08816293	0.08512996	326.4	113816982	121079602
326.6	0.08796618	0.08528494	326.6	113861451	121141659
326.8	0.08863516	0.08543977	326.8	113972186	121203357
327	0.08841586	0.08559442	327	114046049	121264697
327.2	0.08873048	0.08574891	327.2	114118807	121325682
327.4	0.08866992	0.08590324	327.4	114172583	121386314
327.6	0.08887266	0.0860574	327.6	114188888	121446595
327.8	0.08930937	0.0862114	327.8	114232522	121506526
328	0.08934651	0.08636523	328	114267452	12156611
328.2	0.08920505	0.0865189	328.2	114305441	121625349
328.4	0.08895507	0.0866724	328.4	114323703	121684245
328.6	0.08847857	0.08682574	328.6	114349687	121742799
328.8	0.08847096	0.08697892	328.8	114348998	121801015
329	0.08826241	0.08713193	329	114404293	121858893
329.2	0.08810372	0.08728478	329.2	114438511	121916436
329.4	0.08836086	0.08743746	329.4	114546574	121973645
329.6	0.08839093	0.08758999	329.6	114628486	122030523
329.8	0.08853582	0.08774235	329.8	114752119	122087072
330	0.08865445	0.08789454	330	114847424	122143293
330.2	0.08922915	0.08804658	330.2	114938758	122199188
330.4	0.08928047	0.08819845	330.4	115028962	12225476
330.6	0.08978385	0.08835016	330.6	115078033	12231001
330.8	0.09038033	0.08850171	330.8	115185667	122364939
331	0.09031533	0.0886531	331	115231856	122419551
331.2	0.09061612	0.08880432	331.2	115280908	122473846
331.4	0.09021008	0.08895538	331.4	11532975	122527826
331.6	0.09068487	0.08910629	331.6	115351925	122581494
331.8	0.09077223	0.08925703	331.8	115368983	122634851
332	0.09012313	0.08940761	332	115357039	122687899
332.2	0.09030604	0.08955803	332.2	115398644	122740639
332.4	0.09049838	0.08970828	332.4	115491785	122793074
332.6	0.0902751	0.08985838	332.6	115509414	122845206
332.8	0.09069532	0.09000832	332.8	115559695	122897035
333	0.09094501	0.0901581	333	115666456	122948564
333.2	0.09104857	0.09030772	333.2	115780053	122999795
333.4	0.09107078	0.09045717	333.4	115892554	123050728
333.6	0.09067388	0.09060647	333.6	115937008	123101367
333.8	0.09137229	0.09075561	333.8	116052851	123151712
334	0.09128875	0.09090459	334	116148335	123201766
334.2	0.09163806	0.09105341	334.2	1162287	12325153
334.4	0.09190491	0.09120207	334.4	116312877	123301005
334.6	0.0925172	0.09135058	334.6	116404101	123350194
334.8	0.09276896	0.09149892	334.8	116527591	123399098
335	0.09271958	0.09164711	335	116621624	123447719
335.2	0.0925238	0.09179513	335.2	116690785	123496058
335.4	0.0921196	0.091943	335.4	116703851	123544117
335.6	0.09206522	0.09209071	335.6	116653083	123591897
335.8	0.09224888	0.09223827	335.8	116703064	123639401
336	0.09240035	0.09238567	336	1167736	12368663
336.2	0.09242667	0.0925329	336.2	116817601	123733585
336.4	0.09225529	0.09267999	336.4	116832894	123780268
336.6	0.09246523	0.09282691	336.6	116861627	12382668
336.8	0.09209764	0.09297368	336.8	116850475	123872824
337	0.09208062	0.09312029	337	116914318	123918701
337.2	0.09208427	0.09326674	337.2	116945534	123964311
337.4	0.09220705	0.09341304	337.4	117003196	124009658
337.6	0.09271115	0.09355918	337.6	117087407	124054741
337.8	0.09360411	0.09370517	337.8	117218141	124099564
338	0.09354166	0.093851	338	117279651	124144127
338.2	0.09440903	0.09399667	338.2	1173797	124188432
338.4	0.09482337	0.09414219	338.4	117460959	12423248
338.6	0.0950195	0.09428756	338.6	117563974	124276273
338.8	0.09521196	0.09443277	338.8	117647959	124319812
339	0.09556719	0.09457782	339	11772388	124363099
339.2	0.09536616	0.09472272	339.2	11780026	124406136
339.4	0.09536888	0.09486746	339.4	117837487	124448923
339.6	0.09522606	0.09501205	339.6	117896301	124491462
339.8	0.09538037	0.09515648	339.8	117992663	124533754
340	0.09522785	0.09530076	340	11808995	124575802
340.2	0.09490129	0.09544489	340.2	118107688	124617606
340.4	0.09498492	0.09558886	340.4	118150815	124659168
340.6	0.09495728	0.09573268	340.6	118174981	12470049
340.8	0.09463332	0.09587635	340.8	118179122	124741571
341	0.0947129	0.09601986	341	118233767	124782415
341.2	0.09481194	0.09616322	341.2	118286896	124823023
341.4	0.09484803	0.09630642	341.4	118334108	124863395
341.6	0.09530063	0.09644947	341.6	118420319	124903533
341.8	0.09558024	0.09659237	341.8	118462953	124943438
342	0.09585432	0.09673512	342	118503381	124983113
342.2	0.09640783	0.09687771	342.2	118620447	125022558
342.4	0.09682111	0.09702016	342.4	11870379	125061774
342.6	0.09685888	0.09716245	342.6	118771489	125100763
342.8	0.09730074	0.09730459	342.8	118857649	125139526
343	0.09767144	0.09744657	343	118973158	125178064
343.2	0.0977908	0.09758841	343.2	119057809	12521638
343.4	0.09788933	0.09773009	343.4	119136174	125254473
343.6	0.09815947	0.09787162	343.6	119223192	125292346
343.8	0.09825617	0.098013	343.8	119290833	125329999
344	0.09837252	0.09815423	344	119368308	125367434
344.2	0.09790452	0.09829531	344.2	119341032	125404653
344.4	0.09834087	0.09843624	344.4	119391033	125441655
344.6	0.09805008	0.09857702	344.6	119375959	125478444
344.8	0.09851464	0.09871765	344.8	11948701	125515019
345	0.09833903	0.09885812	345	119510715	125551382
345.2	0.09867453	0.09899845	345.2	119642117	125587535
345.4	0.09815671	0.09913863	345.4	119644416	125623478
345.6	0.09879239	0.09927866	345.6	11973282	125659213
345.8	0.09876731	0.09941854	345.8	119761985	125694741
346	0.09929415	0.09955827	346	119822858	125730064
346.2	0.09960413	0.09969785	346.2	119899259	125765181
346.4	0.09984731	0.09983728	346.4	119982257	125800096
346.6	0.09988165	0.09997656	346.6	119996268	125834808
346.8	0.10001783	0.10011569	346.8	120075792	125869318
347	0.10052351	0.10025468	347	120138699	125903629
347.2	0.1008277	0.10039351	347.2	120192777	125937742
347.4	0.10060159	0.1005322	347.4	12024096	125971656
347.6	0.10071459	0.10067074	347.6	120290914	126005374
347.8	0.10062284	0.10080913	347.8	120324065	126038897
348	0.10102038	0.10094738	348	120413501	126072226
348.2	0.10066843	0.10108547	348.2	120458079	126105361
348.4	0.10097392	0.10122342	348.4	12054084	126138305
348.6	0.10075306	0.10136123	348.6	120558633	126171058
348.8	0.10067384	0.10149888	348.8	12062079	126203621
349	0.10002854	0.10163639	349	120610466	126235995
349.2	0.10009189	0.10177375	349.2	12064695	126268182
349.4	0.09968299	0.10191096	349.4	120614144	126300182
349.6	0.10004711	0.10204803	349.6	120723373	126331997
349.8	0.10003458	0.10218495	349.8	120743119	126363628
350	0.10063009	0.10232173	350	120812937	126395076
350.2	0.10040426	0.10245836	350.2	120860424	126426341
350.4	0.10001432	0.10259484	350.4	120903323	126457425
350.6	0.10022662	0.10273118	350.6	12090929	126488329
350.8	0.09985931	0.10286737	350.8	120966407	126519054
351	0.10043733	0.10300341	351	121032619	126549602
351.2	0.10045808	0.10313932	351.2	121063985	126579972
351.4	0.10056651	0.10327507	351.4	121115524	126610166
351.6	0.1009267	0.10341068	351.6	121207253	126640185
351.8	0.10127475	0.10354615	351.8	121299376	126670031
352	0.1015568	0.10368147	352	121378524	126699703
352.2	0.10105191	0.10381665	352.2	121382728	126729204
352.4	0.10124679	0.10395168	352.4	121412131	126758534
352.6	0.1014442	0.10408657	352.6	121470685	126787694
352.8	0.10167008	0.10422131	352.8	121523677	126816685
353	0.10216108	0.10435591	353	121616257	126845508
353.2	0.10256041	0.10449037	353.2	121658298	126874164
353.4	0.1030199	0.10462468	353.4	121726855	126902654
353.6	0.10338226	0.10475885	353.6	121809684	126930979
353.8	0.10359034	0.10489288	353.8	121795309	126959139
354	0.10384581	0.10502676	354	121878052	126987137
354.2	0.10348708	0.10516051	354.2	121931233	127014973
354.4	0.10346048	0.1052941	354.4	121982345	127042647
354.6	0.10398379	0.10542756	354.6	122070305	127070161
354.8	0.10373304	0.10556087	354.8	122103343	127097516
355	0.10366591	0.10569404	355	122140351	127124712
355.2	0.10354766	0.10582707	355.2	12219018	127151751
355.4	0.1036307	0.10595995	355.4	122263957	127178633
355.6	0.10366105	0.1060927	355.6	122323036	127205359
355.8	0.10353189	0.1062253	355.8	12234968	12723193
356	0.10329728	0.10635776	356	122391265	127258348
356.2	0.10344582	0.10649008	356.2	122433576	127284612
356.4	0.10373231	0.10662226	356.4	122494081	127310725
356.6	0.10421026	0.1067543	356.6	12257312	127336686
356.8	0.10479001	0.10688619	356.8	12265047	127362497
357	0.10486303	0.10701795	357	122702548	127388158
357.2	0.105486	0.10714956	357.2	122723461	12741367
357.4	0.10599215	0.10728104	357.4	122754196	127439035
357.6	0.10559311	0.10741237	357.6	122763409	127464253
357.8	0.10562477	0.10754356	357.8	122815182	127489324
358	0.10591894	0.10767461	358	122878468	127514251
358.2	0.10606747	0.10780553	358.2	122922334	127539033
358.4	0.10634406	0.1079363	358.4	122973249	127563672
358.6	0.10656164	0.10806693	358.6	123014184	127588167
358.8	0.10593391	0.10819743	358.8	123007292	127612521
359	0.10602499	0.10832778	359	123083269	127636734
359.2	0.10647535	0.108458	359.2	123179217	127660807
359.4	0.10666834	0.10858808	359.4	123218498	12768474
359.6	0.10672638	0.10871801	359.6	123275101	127708534
359.8	0.10634744	0.10884781	359.8	123298086	127732191
360	0.10639504	0.10897747	360	123395872	12775571
360.2	0.1067582	0.10910699	360.2	123412253	127779094
360.4	0.10666634	0.10923638	360.4	123460664	127802342
360.6	0.10719644	0.10936562	360.6	123525161	127825455
360.8	0.10751206	0.10949473	360.8	12360704	127848434
361	0.10781273	0.1096237	361	123646121	12787128
361.2	0.10781056	0.10975253	361.2	123635687	127893994
361.4	0.10744431	0.10988123	361.4	123634045	127916576
361.6	0.10717925	0.11000978	361.6	123674837	127939028
361.8	0.10723462	0.1101382	361.8	123742733	127961349
362	0.10748274	0.11026649	362	123787024	127983541
362.2	0.10770017	0.11039463	362.2	123839786	128005605
362.4	0.10753687	0.11052264	362.4	123856273	128027541
362.6	0.10780515	0.11065051	362.6	123906165	128049349
362.8	0.10793621	0.11077825	362.8	124000993	128071032
363	0.10838327	0.11090585	363	124074783	128092588
363.2	0.10806397	0.11103331	363.2	124148038	12811402
363.4	0.10793143	0.11116064	363.4	124194516	128135328
363.6	0.10744821	0.11128783	363.6	124262407	128156512
363.8	0.10714864	0.11141488	363.8	124330143	128177574
364	0.10704817	0.1115418	364	124396942	128198513
364.2	0.10729092	0.11166858	364.2	12442284	128219331
364.4	0.10754873	0.11179523	364.4	124491113	128240029
364.6	0.10805841	0.11192174	364.6	124558149	128260607
364.8	0.10850887	0.11204812	364.8	124653614	128281065
365	0.10894441	0.11217437	365	124689979	128301405
365.2	0.1089278	0.11230047	365.2	124717703	128321627
365.4	0.10903186	0.11242645	365.4	124839191	128341733
365.6	0.10887627	0.11255229	365.6	124923121	128361721
365.8	0.10899405	0.11267799	365.8	124948603	128381594
366	0.10954825	0.11280356	366	125024034	128401352
366.2	0.10974893	0.112929	366.2	125074263	128420995
366.4	0.11026785	0.1130543	366.4	125099701	128440524
366.6	0.11105195	0.11317947	366.6	125218335	12845994
366.8	0.11079674	0.1133045	366.8	125241937	128479244
367	0.11087765	0.1134294	367	125249343	128498436
367.2	0.11051971	0.11355417	367.2	12524992	128517517
367.4	0.11060605	0.11367881	367.4	125246221	128536487
367.6	0.11007957	0.11380331	367.6	125252178	128555348
367.8	0.11047201	0.11392768	367.8	125271341	128574099
368	0.1107341	0.11405191	368	125267025	128592741
368.2	0.1111314	0.11417602	368.2	125291215	128611276
368.4	0.11098881	0.11429999	368.4	125344819	128629703
368.6	0.11067608	0.11442383	368.6	125375807	128648023
368.8	0.11125694	0.11454753	368.8	125464838	128666238
369	0.11091217	0.11467111	369	125497778	128684347
369.2	0.1108803	0.11479455	369.2	125585512	12870235
369.4	0.11075882	0.11491786	369.4	125645573	12872025
369.6	0.11085589	0.11504104	369.6	125636608	128738046
369.8	0.11086043	0.11516408	369.8	125646724	128755739
370	0.11095539	0.115287	370	125743652	128773329
370.2	0.11101021	0.11540978	370.2	125800448	128790817
370.4	0.11161096	0.11553244	370.4	125867049	128808204
370.6	0.11209884	0.11565496	370.6	125951676	128825491
370.8	0.11174063	0.11577735	370.8	125961924	128842677
371	0.11236699	0.11589961	371	126025744	128859764
371.2	0.11243105	0.11602174	371.2	126062423	128876751
371.4	0.11272446	0.11614374	371.4	126121798	128893641
371.6	0.11248546	0.11626561	371.6	126128946	128910432
371.8	0.11342826	0.11638735	371.8	1261869	128927126
372	0.11421869	0.11650896	372	126278965	128943724
372.2	0.1140713	0.11663044	372.2	126349599	128960225
372.4	0.11412851	0.11675179	372.4	126425991	128976631
372.6	0.11426238	0.11687301	372.6	126456574	128992941
372.8	0.11500288	0.1169941	372.8	126569179	129009158
373	0.11503039	0.11711506	373	126605627	12902528
373.2	0.11533709	0.1172359	373.2	126674432	129041309
373.4	0.11518991	0.1173566	373.4	126672806	129057245
373.6	0.1151727	0.11747717	373.6	126666833	129073089
373.8	0.11518133	0.11759762	373.8	126733662	12908884
374	0.11514436	0.11771794	374	126782967	129104501
374.2	0.11525374	0.11783812	374.2	12684776	129120071
374.4	0.11580736	0.11795818	374.4	126886865	129135551
374.6	0.11570132	0.11807812	374.6	126891	129150941
374.8	0.11492971	0.11819792	374.8	126905437	129166242
375	0.11493502	0.1183176	375	126961161	129181454
375.2	0.11445906	0.11843715	375.2	126953833	129196578
375.4	0.1143371	0.11855657	375.4	126978575	129211615
375.6	0.114439	0.11867586	375.6	126989348	129226564
375.8	0.11487037	0.11879502	375.8	127050807	129241427
376	0.11549964	0.11891406	376	127155083	129256204
376.2	0.11543363	0.11903297	376.2	127180306	129270895
376.4	0.1157825	0.11915176	376.4	127192963	129285501
376.6	0.11551837	0.11927042	376.6	127165431	129300023
376.8	0.11550839	0.11938895	376.8	127188788	12931446
377	0.11527359	0.11950735	377	127181289	129328814
377.2	0.11525421	0.11962563	377.2	127215682	129343084
377.4	0.1153684	0.11974378	377.4	127239641	129357272
377.6	0.1155559	0.11986181	377.6	127249688	129371378
377.8	0.11585991	0.11997971	377.8	127308578	129385402
378	0.11567622	0.12009748	378	127319366	129399344
378.2	0.11577899	0.12021513	378.2	127362224	129413206
378.4	0.11571269	0.12033265	378.4	127379563	129426988
378.6	0.11509019	0.12045004	378.6	127419469	12944069
378.8	0.11531528	0.12056732	378.8	127549158	129454312
379	0.11518763	0.12068446	379	127554983	129467856
379.2	0.11570234	0.12080148	379.2	127639376	129481321
379.4	0.11595591	0.12091838	379.4	127728747	129494708
379.6	0.11622112	0.12103515	379.6	127799907	129508018
379.8	0.11651138	0.1211518	379.8	127910227	12952125
380	0.1171372	0.12126832	380	128037312	129534406
380.2	0.11706895	0.12138472	380.2	128034831	129547485
380.4	0.11698195	0.12150099	380.4	128064796	129560489
380.6	0.11659573	0.12161714	380.6	12803341	129573418
380.8	0.11672747	0.12173316	380.8	128097405	129586271
381	0.11731016	0.12184906	381	12817393	12959905
381.2	0.11781071	0.12196484	381.2	12824578	129611755
381.4	0.11817636	0.12208049	381.4	128314175	129624387
381.6	0.1183559	0.12219602	381.6	12831291	129636945
381.8	0.11910957	0.12231143	381.8	128371999	129649431
382	0.11963278	0.12242671	382	128411506	129661844
382.2	0.1198163	0.12254188	382.2	128450905	129674185
382.4	0.12026737	0.12265691	382.4	128484645	129686455
382.6	0.12017408	0.12277183	382.6	128499973	129698654
382.8	0.1201372	0.12288662	382.8	128491887	129710782
383	0.12001608	0.12300129	383	12845023	12972284
383.2	0.12023396	0.12311584	383.2	128534096	129734828
383.4	0.11992827	0.12323026	383.4	128507747	129746746
383.6	0.11980536	0.12334456	383.6	128538136	129758596
383.8	0.11991474	0.12345874	383.8	128546177	129770377
384	0.11946058	0.1235728	384	128535141	129782089
384.2	0.11866594	0.12368674	384.2	128483142	129793734
384.4	0.11847958	0.12380055	384.4	128470967	129805312
384.6	0.11777321	0.12391425	384.6	12843729	129816822
384.8	0.11767152	0.12402782	384.8	128511997	129828265
385	0.11754781	0.12414127	385	12852077	129839643
385.2	0.11726601	0.1242546	385.2	128606415	129850954
385.4	0.11764453	0.12436781	385.4	128687814	1298622
385.6	0.1178128	0.12448089	385.6	128744054	129873381
385.8	0.11850839	0.12459386	385.8	128846107	129884496
386	0.11886439	0.12470671	386	128956184	129895548
386.2	0.11904131	0.12481943	386.2	12903844	129906536
386.4	0.11935354	0.12493204	386.4	129110946	129917459
386.6	0.11872426	0.12504452	386.6	129180012	12992832
386.8	0.11873581	0.12515689	386.8	12918623	129939118
387	0.11970217	0.12526913	387	129306986	129949853
387.2	0.11951717	0.12538126	387.2	129345695	129960526
387.4	0.12005917	0.12549327	387.4	129376343	129971137
387.6	0.12012783	0.12560515	387.6	129427939	129981686
387.8	0.12039994	0.12571692	387.8	12943887	129992175
388	0.1204625	0.12582856	388	129475478	130002603
388.2	0.12042716	0.12594009	388.2	12944286	13001297
388.4	0.12054316	0.1260515	388.4	129387347	130023277
388.6	0.12019815	0.12616279	388.6	129397064	130033525
388.8	0.12025102	0.12627396	388.8	129393045	130043713
389	0.12007023	0.12638501	389	12938985	130053842
389.2	0.12059723	0.12649595	389.2	129471014	130063913
389.4	0.12125681	0.12660676	389.4	129538196	130073925
389.6	0.12207068	0.12671746	389.6	129630986	130083879
389.8	0.12280231	0.12682804	389.8	129670319	130093776
390	0.12331598	0.1269385	390	12974205	130103615
390.2	0.12349668	0.12704884	390.2	129753569	130113397
390.4	0.12333361	0.12715907	390.4	129799575	130123123
390.6	0.12290995	0.12726917	390.6	129879422	130132792
390.8	0.12348999	0.12737916	390.8	129919307	130142405
391	0.12398282	0.12748904	391	130015619	130151963
391.2	0.12325335	0.12759879	391.2	130017361	130161465
391.4	0.12383183	0.12770843	391.4	130106375	130170912
391.6	0.12374331	0.12781795	391.6	130169761	130180304
391.8	0.12390503	0.12792735	391.8	13020313	130189642
392	0.12371394	0.12803664	392	130202695	130198926
392.2	0.12303811	0.12814581	392.2	130139214	130208156
392.4	0.12256237	0.12825486	392.4	130156524	130217333
392.6	0.12204856	0.1283638	392.6	130184502	130226456
392.8	0.12129856	0.12847262	392.8	130159273	130235527
393	0.12058729	0.12858132	393	130149713	130244545
393.2	0.12075336	0.12868991	393.2	130198396	130253511
393.4	0.12106035	0.12879838	393.4	130221316	130262425
393.6	0.12117468	0.12890674	393.6	130168072	130271287
393.8	0.12133336	0.12901498	393.8	130184174	130280098
394	0.12096218	0.12912311	394	130207286	130288858
394.2	0.1208184	0.12923112	394.2	130203186	130297567
394.4	0.12112144	0.12933901	394.4	13029758	130306226
394.6	0.12158548	0.12944679	394.6	130348587	130314834
394.8	0.12203979	0.12955446	394.8	130395679	130323393
395	0.12316681	0.129662	395	130456355	130331902
395.2	0.12307318	0.12976944	395.2	130517914	130340362
395.4	0.12409627	0.12987676	395.4	130623629	130348772
395.6	0.12447456	0.12998396	395.6	130712209	130357134
395.8	0.12499712	0.13009105	395.8	13079973	130365448
396	0.12478989	0.13019803	396	130800271	130373713
396.2	0.12504441	0.13030489	396.2	130879525	130381931
396.4	0.12514757	0.13041164	396.4	130986761	130390101
396.6	0.1252509	0.13051827	396.6	130975105	130398224
396.8	0.12457188	0.13062479	396.8	130965047	130406299
397	0.12441466	0.1307312	397	130956972	130414328
397.2	0.12469223	0.13083749	397.2	131000265	13042231
397.4	0.12459764	0.13094367	397.4	130990639	130430246
397.6	0.12411351	0.13104974	397.6	130986276	130438136
397.8	0.12424482	0.13115569	397.8	13106785	130445981
398	0.12405167	0.13126153	398	131044588	13045378
398.2	0.12401133	0.13136726	398.2	131049536	130461533
398.4	0.12407308	0.13147287	398.4	131050321	130469242
398.6	0.12424178	0.13157837	398.6	131059661	130476906
398.8	0.12421747	0.13168376	398.8	131120449	130484526
399	0.12520013	0.13178903	399	131179287	130492102
399.2	0.12486664	0.1318942	399.2	131232448	130499634
399.4	0.12513582	0.13199925	399.4	131266922	130507122
399.6	0.12500582	0.13210419	399.6	131342835	130514566
399.8	0.12528496	0.13220901	399.8	13138809	130521968
400	0.12540753	0.13231373	400	131423384	130529327
400.2	0.12566904	0.13241833	400.2	13151845	130536643
400.4	0.12579531	0.13252282	400.4	131540895	130543917
400.6	0.12626381	0.1326272	400.6	131576173	130551148
400.8	0.12626579	0.13273147	400.8	131617646	130558338
401	0.12685884	0.13283563	401	131661467	130565486
401.2	0.12694	0.13293967	401.2	131740729	130572593
401.4	0.1269054	0.13304361	401.4	131784631	130579658
401.6	0.12677179	0.13314743	401.6	131824985	130586683
401.8	0.12716339	0.13325114	401.8	131834876	130593667
402	0.12755689	0.13335474	402	131869544	13060061
402.2	0.12806449	0.13345824	402.2	131929702	130607513
402.4	0.12840138	0.13356162	402.4	131937692	130614376
402.6	0.12921183	0.13366489	402.6	132013229	1306212
402.8	0.12935734	0.13376805	402.8	132009031	130627984
403	0.1299287	0.1338711	403	132062455	130634728
403.2	0.1297792	0.13397404	403.2	132105703	130641434
403.4	0.13008655	0.13407687	403.4	132150109	130648101
403.6	0.13026971	0.13417959	403.6	132246988	130654729
403.8	0.13035491	0.1342822	403.8	132272922	130661318
404	0.13020757	0.1343847	404	13230915	13066787
404.2	0.12994354	0.13448709	404.2	132346828	130674383
404.4	0.13027314	0.13458937	404.4	13238439	130680859
404.6	0.13042453	0.13469154	404.6	132446888	130687297
404.8	0.1302445	0.13479361	404.8	13246821	130693698
405	0.13032772	0.13489556	405	1325099	130700062
405.2	0.12984018	0.13499741	405.2	132553465	130706389
405.4	0.12971552	0.13509915	405.4	132554954	13071268
405.6	0.12930217	0.13520077	405.6	132553723	130718934
405.8	0.12927876	0.13530229	405.8	13256078	130725152
406	0.12943445	0.13540371	406	132597411	130731333
406.2	0.12946419	0.13550501	406.2	132625003	130737479
406.4	0.12944757	0.1356062	406.4	132618849	13074359
406.6	0.12995774	0.13570729	406.6	132630072	130749664
406.8	0.13005043	0.13580827	406.8	132652098	130755704
407	0.13025786	0.13590914	407	132695519	130761709
407.2	0.13041539	0.1360099	407.2	132760793	130767679
407.4	0.13080488	0.13611056	407.4	132850341	130773614
407.6	0.13030784	0.13621111	407.6	132880508	130779515
407.8	0.12992481	0.13631155	407.8	132881553	130785382
408	0.1300914	0.13641188	408	132910367	130791215
408.2	0.13016043	0.13651211	408.2	132985978	130797014
408.4	0.13076639	0.13661223	408.4	133032352	130802779
408.6	0.13064837	0.13671224	408.6	133080734	130808511
408.8	0.13044392	0.13681215	408.8	133108043	13081421
409	0.13096232	0.13691195	409	133158647	130819876
409.2	0.13103684	0.13701164	409.2	13320633	130825509
409.4	0.13113265	0.13711123	409.4	133218314	130831109
409.6	0.13025782	0.13721071	409.6	133234949	130836677
409.8	0.13047788	0.13731008	409.8	133309325	130842213
410	0.13052719	0.13740935	410	133318547	130847717
410.2	0.13083207	0.13750851	410.2	133338132	130853188
410.4	0.13135462	0.13760757	410.4	133330043	130858628
410.6	0.13200004	0.13770652	410.6	133377792	130864037
410.8	0.13198325	0.13780536	410.8	133339727	130869414
411	0.13214027	0.1379041	411	133362347	13087476
411.2	0.13232084	0.13800273	411.2	133421048	130880075
411.4	0.1329549	0.13810126	411.4	133502639	130885359
411.6	0.13314285	0.13819968	411.6	133511646	130890613
411.8	0.13371224	0.138298	411.8	133554647	130895836
412	0.13401325	0.13839621	412	133599336	130901029
412.2	0.1345808	0.13849432	412.2	133714516	130906192
412.4	0.13495065	0.13859232	412.4	133747337	130911325
412.6	0.13526025	0.13869022	412.6	133838805	130916428
412.8	0.13555337	0.13878802	412.8	133891214	130921502
413	0.13599712	0.13888571	413	133937676	130926546
413.2	0.13575573	0.13898329	413.2	133973572	130931561
413.4	0.13584274	0.13908077	413.4	134025223	130936547
413.6	0.13536345	0.13917815	413.6	134057783	130941505
413.8	0.13574329	0.13927542	413.8	134123176	130946433
414	0.13530651	0.13937259	414	134115452	130951333
414.2	0.13599037	0.13946966	414.2	134109032	130956204
414.4	0.13534576	0.13956662	414.4	1340626	130961048
414.6	0.13548619	0.13966348	414.6	134060867	130965863
414.8	0.13435564	0.13976023	414.8	134010946	13097065
415	0.13378892	0.13985688	415	134034626	13097541
415.2	0.13339636	0.13995343	415.2	134019122	130980142
415.4	0.13319197	0.14004987	415.4	134042824	130984846
415.6	0.13285853	0.14014622	415.6	134009758	130989524
415.8	0.13285004	0.14024246	415.8	134037969	130994174
416	0.13259519	0.14033859	416	134037787	130998797
416.2	0.13269431	0.14043463	416.2	134116222	131003394
416.4	0.13287826	0.14053056	416.4	134144553	131007964
416.6	0.13338417	0.14062638	416.6	134202597	131012507
416.8	0.13328632	0.14072211	416.8	134192845	131017024
417	0.13342783	0.14081774	417	134221554	131021515
417.2	0.13408353	0.14091326	417.2	134336299	13102598
417.4	0.13506755	0.14100868	417.4	134461665	131030419
417.6	0.13549382	0.141104	417.6	134515788	131034833
417.8	0.13621054	0.14119921	417.8	134593035	13103922
418	0.13707187	0.14129433	418	134676033	131043583
418.2	0.1377392	0.14138934	418.2	134680725	13104792
418.4	0.13752544	0.14148425	418.4	134691486	131052232
418.6	0.13813207	0.14157906	418.6	134756308	131056519
418.8	0.13749358	0.14167377	418.8	134742178	131060781
419	0.13757374	0.14176838	419	134692749	131065018
419.2	0.13726246	0.14186289	419.2	134668446	131069231
419.4	0.1371261	0.14195729	419.4	13463334	13107342
419.6	0.13721287	0.1420516	419.6	134639037	131077584
419.8	0.13722293	0.1421458	419.8	134675875	131081724
420	0.13689916	0.14223991	420	134649169	13108584
420.2	0.13674062	0.14233391	420.2	134679788	131089933
420.4	0.13670023	0.14242781	420.4	134673895	131094001
420.6	0.13671043	0.14252161	420.6	13470863	131098046
420.8	0.13665523	0.14261532	420.8	13475159	131102068
421	0.1365423	0.14270892	421	13481755	131106066
421.2	0.13724191	0.14280242	421.2	134936605	131110041
421.4	0.13750581	0.14289582	421.4	135049399	131113993
421.6	0.13752794	0.14298913	421.6	135099619	131117923
421.8	0.13725679	0.14308233	421.8	135154436	131121829
422	0.13706355	0.14317543	422	135172268	131125713
422.2	0.13685959	0.14326844	422.2	135160741	131129574
422.4	0.13736096	0.14336134	422.4	135197336	131133413
422.6	0.13750177	0.14345415	422.6	135220269	13113723
422.8	0.13766606	0.14354686	422.8	135191918	131141024
423	0.1377449	0.14363946	423	135201117	131144797
423.2	0.13743756	0.14373197	423.2	135237943	131148548
423.4	0.13801733	0.14382438	423.4	13526067	131152277
423.6	0.1380142	0.1439167	423.6	135296897	131155984
423.8	0.13880034	0.14400891	423.8	135361188	13115967
424	0.13865471	0.14410102	424	135364035	131163335
424.2	0.13916352	0.14419304	424.2	135420404	131166978
424.4	0.13957223	0.14428496	424.4	135490738	131170601
424.6	0.13983303	0.14437678	424.6	135550851	131174202
424.8	0.13961501	0.1444685	424.8	135564159	131177782
425	0.1394869	0.14456012	425	135618375	131181342
425.2	0.13980004	0.14465165	425.2	135674476	131184881
425.4	0.13912129	0.14474308	425.4	135657686	1311884
425.6	0.13902327	0.14483441	425.6	135664826	131191898
425.8	0.13853467	0.14492564	425.8	135640994	131195376
426	0.13819098	0.14501677	426	135609124	131198834
426.2	0.13854032	0.14510781	426.2	135631281	131202271
426.4	0.13898873	0.14519875	426.4	135677724	131205689
426.6	0.13863018	0.1452896	426.6	135677511	131209087
426.8	0.13879417	0.14538034	426.8	135697137	131212465
427	0.13873927	0.14547099	427	135752525	131215824
427.2	0.13873188	0.14556155	427.2	135856793	131219164
427.4	0.13895779	0.145652	427.4	135928132	131222484
427.6	0.13894766	0.14574236	427.6	136018241	131225784
427.8	0.13930798	0.14583263	427.8	136099357	131229066
428	0.13911464	0.14592279	428	136153178	131232329
428.2	0.13995034	0.14601286	428.2	1362401	131235572
428.4	0.14001497	0.14610284	428.4	136284782	131238797
428.6	0.13945061	0.14619272	428.6	136247163	131242003
428.8	0.13978697	0.1462825	428.8	136262989	131245191
429	0.13985913	0.14637219	429	136257387	13124836
429.2	0.13997551	0.14646178	429.2	136229298	131251511
429.4	0.14016323	0.14655127	429.4	136196567	131254644
429.6	0.14060278	0.14664067	429.6	136215433	131257758
429.8	0.1403992	0.14672998	429.8	136174828	131260855
430	0.14075423	0.14681919	430	136188754	131263933
430.2	0.14105745	0.1469083	430.2	136157947	131266994
430.4	0.14096242	0.14699732	430.4	136161097	131270037
430.6	0.14097501	0.14708624	430.6	136160021	131273062
430.8	0.14142517	0.14717507	430.8	136244023	13127607
431	0.14172975	0.1472638	431	136318224	13127906
431.2	0.14187182	0.14735244	431.2	136420292	131282033
431.4	0.14185037	0.14744098	431.4	136464812	131284989
431.6	0.14190219	0.14752943	431.6	13649968	131287927
431.8	0.14162861	0.14761779	431.8	136520653	131290849
432	0.14162406	0.14770605	432	136557951	131293754
432.2	0.14174759	0.14779422	432.2	13660211	131296642
432.4	0.14131331	0.14788229	432.4	136574042	131299513
432.6	0.14073158	0.14797027	432.6	136519644	131302367
432.8	0.14116869	0.14805815	432.8	136574132	131305205
433	0.14098553	0.14814594	433	13660121	131308027
433.2	0.14105751	0.14823364	433.2	136628538	131310832
433.4	0.14126462	0.14832124	433.4	136654535	131313621
433.6	0.14135889	0.14840875	433.6	136635387	131316394
433.8	0.14197808	0.14849617	433.8	136702827	13131915
434	0.14194507	0.14858349	434	136719186	131321891
434.2	0.14228057	0.14867072	434.2	136714064	131324616
434.4	0.14266746	0.14875786	434.4	136750424	131327325
434.6	0.14369628	0.1488449	434.6	136826224	131330019
434.8	0.14398081	0.14893185	434.8	136844646	131332696
435	0.14440124	0.14901871	435	136879456	131335359
435.2	0.14464481	0.14910547	435.2	13694236	131338006
435.4	0.14477388	0.14919215	435.4	136934758	131340637
435.6	0.14524029	0.14927872	435.6	136977947	131343253
435.8	0.14542634	0.14936521	435.8	137023758	131345855
436	0.14570835	0.14945161	436	137064199	131348441
436.2	0.14613416	0.14953791	436.2	137127579	131351012
436.4	0.14570821	0.14962412	436.4	137150742	131353568
436.6	0.14548854	0.14971024	436.6	137200015	131356109
436.8	0.14619339	0.14979626	436.8	137294195	131358636
437	0.1458126	0.1498822	437	137307371	131361148
437.2	0.14564355	0.14996804	437.2	13731284	131363645
437.4	0.14555388	0.15005379	437.4	13731253	131366128
437.6	0.14580652	0.15013945	437.6	137291904	131368597
437.8	0.14605287	0.15022502	437.8	137373941	131371051
438	0.14583284	0.1503105	438	137375063	131373492
438.2	0.14628359	0.15039588	438.2	137398917	131375917
438.4	0.14613927	0.15048118	438.4	137398038	131378329
438.6	0.14631735	0.15056638	438.6	137418911	131380727
438.8	0.14593926	0.15065149	438.8	137391677	131383111
439	0.14595245	0.15073651	439	137410243	131385482
439.2	0.14600435	0.15082144	439.2	137408816	131387838
439.4	0.1462266	0.15090628	439.4	137393621	131390181
439.6	0.14636036	0.15099103	439.6	13741754	13139251
439.8	0.14632084	0.15107569	439.8	13743035	131394826
440	0.14632084	0.15116067	440	13743035	13139714
440.2	0.14563156	0.15116067	440.2	137412847	131378289
440.4	0.14513302	0.15116067	440.4	137372245	131359441
440.6	0.14496088	0.15116067	440.6	137376236	131340595
440.8	0.14482479	0.15116067	440.8	137393244	131321752
441	0.14438255	0.15116067	441	137363563	131302912
441.2	0.14351566	0.15116067	441.2	137308672	131284075
441.4	0.14283627	0.15116067	441.4	13724361	13126524
441.6	0.14215818	0.15116067	441.6	137171892	131246408
441.8	0.1420525	0.15116067	441.8	137149475	131227579
442	0.14190757	0.15116067	442	137103517	131208753
442.2	0.14204739	0.15116067	442.2	137033212	131189929
442.4	0.14211511	0.15116067	442.4	136989393	131171108
442.6	0.14237182	0.15116067	442.6	136934535	131152289
442.8	0.14277176	0.15116067	442.8	136896171	131133473
443	0.14299726	0.15116067	443	136833935	13111466
443.2	0.14300037	0.15116067	443.2	13672526	13109585
443.4	0.14355058	0.15116067	443.4	136714148	131077042
443.6	0.14373221	0.15116067	443.6	136598328	131058238
443.8	0.14373772	0.15116067	443.8	136520995	131039435
444	0.14404777	0.15116067	444	136430117	131020636
444.2	0.14372677	0.15116067	444.2	136340733	131001839
444.4	0.14460863	0.15116067	444.4	136328402	130983045
444.6	0.14490265	0.15116067	444.6	136339933	130964253
444.8	0.14497632	0.15116067	444.8	136264637	130945464
445	0.14470396	0.15116067	445	136173737	130926678
445.2	0.14451726	0.15116067	445.2	136116559	130907895
445.4	0.14474511	0.15116067	445.4	136045957	130889114
445.6	0.14501337	0.15116067	445.6	136050227	130870336
445.8	0.14527115	0.15116067	445.8	13605069	130851561
446	0.14517525	0.15116067	446	136032807	130832788
446.2	0.1456444	0.15116067	446.2	136060339	130814019
446.4	0.14564776	0.15116067	446.4	136048816	130795251
446.6	0.14544763	0.15116067	446.6	136040314	130776487
446.8	0.14555051	0.15116067	446.8	136011928	130757725
447	0.14569215	0.15116067	447	135979513	130738966
447.2	0.14636228	0.15116067	447.2	135984685	130720209
447.4	0.14658719	0.15116067	447.4	135993791	130701456
447.6	0.14610944	0.15116067	447.6	13588783	130682705
447.8	0.14618714	0.15116067	447.8	135853606	130663956
448	0.14589331	0.15116067	448	135779608	130645211
448.2	0.14605413	0.15116067	448.2	135764976	130626468
448.4	0.14643889	0.15116067	448.4	135761159	130607727
448.6	0.14577242	0.15116067	448.6	135657082	13058899
448.8	0.14590655	0.15116067	448.8	135541534	130570255
449	0.14590295	0.15116067	449	135497291	130551522
449.2	0.14613657	0.15116067	449.2	135458389	130532793
449.4	0.14640567	0.15116067	449.4	135421592	130514066
449.6	0.14602048	0.15116067	449.6	135360237	130495342
449.8	0.14579831	0.15116067	449.8	13526722	13047662
450	0.14585546	0.15116067	450	135228938	130457902
450.2	0.14607617	0.15116067	450.2	135224077	130439185
450.4	0.14644031	0.15116067	450.4	135182697	130420472
450.6	0.14665873	0.15116067	450.6	135184862	130401761
450.8	0.14672581	0.15116067	450.8	135119272	130383053
451	0.14675344	0.15116067	451	135086426	130364348
451.2	0.14719014	0.15116067	451.2	135068991	130345645
451.4	0.14685155	0.15116067	451.4	134987451	130326945
451.6	0.1463853	0.15116067	451.6	134920454	130308248
451.8	0.14714407	0.15116067	451.8	134950187	130289553
452	0.14661809	0.15116067	452	134860456	130270861
452.2	0.14720526	0.15116067	452.2	134878892	130252172
452.4	0.14691504	0.15116067	452.4	134802029	130233485
452.6	0.14686209	0.15116067	452.6	134737523	130214801
452.8	0.14680583	0.15116067	452.8	134685388	13019612
453	0.14683876	0.15116067	453	134646773	130177441
453.2	0.14670503	0.15116067	453.2	134596342	130158766
453.4	0.14633792	0.15116067	453.4	134544188	130140092
453.6	0.14620293	0.15116067	453.6	134481295	130121422
453.8	0.1467005	0.15116067	453.8	134510917	130102754
454	0.14700739	0.15116067	454	134467711	130084089
454.2	0.14754816	0.15116067	454.2	134498837	130065426
454.4	0.14852122	0.15116067	454.4	134518426	130046766
454.6	0.14848036	0.15116067	454.6	134470997	130028109
454.8	0.14841895	0.15116067	454.8	134436612	130009455
455	0.14866385	0.15116067	455	134437199	129990803
455.2	0.14920638	0.15116067	455.2	134382987	129972154
455.4	0.14893439	0.15116067	455.4	134353666	129953508
455.6	0.14905355	0.15116067	455.6	134327451	129934864
455.8	0.1496562	0.15116067	455.8	134298462	129916223
456	0.14895006	0.15116067	456	134177222	129897584
456.2	0.14885048	0.15116067	456.2	134127907	129878949
456.4	0.14885081	0.15116067	456.4	134073112	129860316
456.6	0.14927648	0.15116067	456.6	134059362	129841685
456.8	0.14932333	0.15116067	456.8	134036864	129823057
457	0.14979776	0.15116067	457	134017596	129804432
457.2	0.14958062	0.15116067	457.2	134011155	12978581
457.4	0.14938022	0.15116067	457.4	134022918	12976719
457.6	0.14975464	0.15116067	457.6	134030342	129748573
457.8	0.14989497	0.15116067	457.8	134007537	129729959
458	0.14983623	0.15116067	458	13395926	129711347
458.2	0.15002372	0.15116067	458.2	133937322	129692738
458.4	0.14980552	0.15116067	458.4	13391536	129674132
458.6	0.1496547	0.15116067	458.6	133836527	129655528
458.8	0.14936513	0.15116067	458.8	133746756	129636927
459	0.14897882	0.15116067	459	133625786	129618329
459.2	0.14870497	0.15116067	459.2	133568726	129599733
459.4	0.14820479	0.15116067	459.4	133511176	12958114
459.6	0.14806462	0.15116067	459.6	133411282	12956255
459.8	0.14812499	0.15116067	459.8	133325405	129543962
460	0.14754947	0.15116067	460	133237789	129525377
460.2	0.14784839	0.15116067	460.2	133246372	129506795
460.4	0.14808832	0.15116067	460.4	133255661	129488215
460.6	0.14894986	0.15116067	460.6	133282155	129469638
460.8	0.14897111	0.15116067	460.8	133298665	129451064
461	0.14907026	0.15116067	461	133282921	129432492
461.2	0.14901984	0.15116067	461.2	133253654	129413923
461.4	0.14877714	0.15116067	461.4	13324149	129395357
461.6	0.14930891	0.15116067	461.6	13325607	129376793
461.8	0.15002438	0.15116067	461.8	133260098	129358232
462	0.15027404	0.15116067	462	133208862	129339674
462.2	0.15065708	0.15116067	462.2	133121674	129321118
462.4	0.15110969	0.15116067	462.4	133135941	129302565
462.6	0.15159122	0.15116067	462.6	133055468	129284015
462.8	0.1513632	0.15116067	462.8	13292971	129265467
463	0.15110378	0.15116067	463	132865084	129246922
463.2	0.15106172	0.15116067	463.2	132880573	129228379
463.4	0.15091037	0.15116067	463.4	132809133	12920984
463.6	0.15097593	0.15116067	463.6	132743086	129191303
463.8	0.1505181	0.15116067	463.8	132646847	129172768
464	0.15047233	0.15116067	464	132670988	129154236
464.2	0.15022471	0.15116067	464.2	132663328	129135707
464.4	0.14978829	0.15116067	464.4	132585197	129117181
464.6	0.14969506	0.15116067	464.6	132544358	129098657
464.8	0.14909773	0.15116067	464.8	132509139	129080136
465	0.14929407	0.15116067	465	132487268	129061618
465.2	0.14954439	0.15116067	465.2	132447783	129043102
465.4	0.1498181	0.15116067	465.4	132449419	129024589
465.6	0.15091723	0.15116067	465.6	132484786	129006078
465.8	0.15168862	0.15116067	465.8	132489324	12898757
466	0.15224482	0.15116067	466	132488428	128969065
466.2	0.15264069	0.15116067	466.2	132466184	128950563
466.4	0.15312644	0.15116067	466.4	132491022	128932063
466.6	0.15306491	0.15116067	466.6	132425919	128913565
466.8	0.15305221	0.15116067	466.8	132377774	128895071
467	0.15301909	0.15116067	467	132380671	128876579
467.2	0.15301825	0.15116067	467.2	13235693	12885809
467.4	0.15300502	0.15116067	467.4	132306747	128839603
467.6	0.15254099	0.15116067	467.6	132232741	128821119
467.8	0.15220452	0.15116067	467.8	13221369	128802638
468	0.1523918	0.15116067	468	132216607	128784159
468.2	0.15178216	0.15116067	468.2	132112332	128765683
468.4	0.15158622	0.15116067	468.4	132034866	12874721
468.6	0.15115493	0.15116067	468.6	131977645	128728739
468.8	0.15115454	0.15116067	468.8	131977965	128710271
469	0.15151647	0.15116067	469	131954358	128691806
469.2	0.15184188	0.15116067	469.2	131909063	128673343
469.4	0.15245225	0.15116067	469.4	131923958	128654883
469.6	0.15277978	0.15116067	469.6	131937506	128636425
469.8	0.15267932	0.15116067	469.8	131871568	128617971
470	0.15259597	0.15116067	470	131827868	128599518
470.2	0.15217751	0.15116067	470.2	131742015	128581069
470.4	0.15237147	0.15116067	470.4	131764222	128562622
470.6	0.15239061	0.15116067	470.6	131752102	128544178
470.8	0.15287777	0.15116067	470.8	131778023	128525736
471	0.15316617	0.15116067	471	131776471	128507297
471.2	0.15310641	0.15116067	471.2	131739602	128488861
471.4	0.15348356	0.15116067	471.4	131749579	128470427
471.6	0.15285648	0.15116067	471.6	131693878	128451996
471.8	0.15356254	0.15116067	471.8	131696423	128433568
472	0.153882	0.15116067	472	131631205	128415142
472.2	0.15407996	0.15116067	472.2	131564885	128396719
472.4	0.15433253	0.15116067	472.4	131522726	128378299
472.6	0.15469642	0.15116067	472.6	131492484	128359881
472.8	0.15518664	0.15116067	472.8	131487072	128341466
473	0.15592968	0.15116067	473	131480471	128323054
473.2	0.15608132	0.15116067	473.2	131407552	128304644
473.4	0.15616609	0.15116067	473.4	131355487	128286236
473.6	0.15578818	0.15116067	473.6	131263334	128267832
473.8	0.15570964	0.15116067	473.8	131186269	12824943
474	0.15540532	0.15116067	474	131204906	128231031
474.2	0.15519905	0.15116067	474.2	131160956	128212634
474.4	0.15484417	0.15116067	474.4	131173001	12819424
474.6	0.15512192	0.15116067	474.6	131199391	128175849
474.8	0.15496501	0.15116067	474.8	131176062	12815746
475	0.15505669	0.15116067	475	131204505	128139074
475.2	0.1551567	0.15116067	475.2	131159509	12812069
475.4	0.15505844	0.15116067	475.4	131164842	12810231
475.6	0.15401973	0.15116067	475.6	131033662	128083931
475.8	0.15457199	0.15116067	475.8	130983687	128065556
476	0.15443124	0.15116067	476	130919173	128047183
476.2	0.15405338	0.15116067	476.2	130861332	128028813
476.4	0.15428754	0.15116067	476.4	13084046	128010445
476.6	0.15445629	0.15116067	476.6	130781882	12799208
476.8	0.15499532	0.15116067	476.8	13076727	127973718
477	0.15540288	0.15116067	477	130755953	127955358
477.2	0.1553026	0.15116067	477.2	130694633	127937001
477.4	0.15582858	0.15116067	477.4	13072042	127918646
477.6	0.15591777	0.15116067	477.6	130690104	127900295
477.8	0.15637111	0.15116067	477.8	130675679	127881945
478	0.15621411	0.15116067	478	130653464	127863599
478.2	0.15606759	0.15116067	478.2	130569076	127845255
478.4	0.15627245	0.15116067	478.4	130584805	127826914
478.6	0.1568865	0.15116067	478.6	130592528	127808575
478.8	0.15695579	0.15116067	478.8	130563877	127790239
479	0.15753283	0.15116067	479	130628923	127771905
479.2	0.15747107	0.15116067	479.2	13054309	127753575
479.4	0.15732977	0.15116067	479.4	130499185	127735247
479.6	0.15729353	0.15116067	479.6	130428078	127716921
479.8	0.15738003	0.15116067	479.8	130454844	127698598
480	0.1572891	0.15116067	480	130429692	127680278
480.2	0.1572548	0.15116067	480.2	130374259	12766196
480.4	0.15782075	0.15116067	480.4	130387134	127643645
480.6	0.15731841	0.15116067	480.6	130283324	127625333
480.8	0.1576875	0.15116067	480.8	130317089	127607023
481	0.15737051	0.15116067	481	130286788	127588716
481.2	0.15704332	0.15116067	481.2	130254351	127570412
481.4	0.15698454	0.15116067	481.4	130231814	12755211
481.6	0.15661758	0.15116067	481.6	130166226	12753381
481.8	0.15645264	0.15116067	481.8	130109149	127515514
482	0.15619228	0.15116067	482	13007752	12749722
482.2	0.15608444	0.15116067	482.2	130014432	127478928
482.4	0.15615708	0.15116067	482.4	130005864	12746064
482.6	0.15615939	0.15116067	482.6	129975874	127442354
482.8	0.15639469	0.15116067	482.8	129947559	12742407
483	0.15611631	0.15116067	483	129881705	127405789
483.2	0.15641205	0.15116067	483.2	129864211	127387511
483.4	0.15706448	0.15116067	483.4	129858573	127369235
483.6	0.15783574	0.15116067	483.6	129912848	127350962
483.8	0.15796042	0.15116067	483.8	12990638	127332692
484	0.15835633	0.15116067	484	129839848	127314424
484.2	0.15870712	0.15116067	484.2	129797155	127296159
484.4	0.15925542	0.15116067	484.4	129820582	127277896
484.6	0.15909215	0.15116067	484.6	129751542	127259637
484.8	0.15946685	0.15116067	484.8	129805105	127241379
485	0.15936873	0.15116067	485	129789645	127223125
485.2	0.1591118	0.15116067	485.2	129793406	127204873
485.4	0.15925472	0.15116067	485.4	129771063	127186623
485.6	0.15888531	0.15116067	485.6	129734798	127168376
485.8	0.15848436	0.15116067	485.8	129692983	127150132
486	0.15782175	0.15116067	486	129637311	127131891
486.2	0.15719958	0.15116067	486.2	129542148	127113652
486.4	0.15706181	0.15116067	486.4	129485038	127095415
486.6	0.15697838	0.15116067	486.6	129416049	127077182
486.8	0.15660274	0.15116067	486.8	129337855	12705895
487	0.15646044	0.15116067	487	129289064	127040722
487.2	0.15718172	0.15116067	487.2	129321155	127022496
487.4	0.157659	0.15116067	487.4	129294768	127004273
487.6	0.15845188	0.15116067	487.6	129308815	126986052
487.8	0.15832628	0.15116067	487.8	129271754	126967834
488	0.1587856	0.15116067	488	129213756	126949619
488.2	0.15926832	0.15116067	488.2	129178757	126931406
488.4	0.15999117	0.15116067	488.4	129157316	126913196
488.6	0.16035309	0.15116067	488.6	129143424	126894988
488.8	0.16080217	0.15116067	488.8	129135984	126876783
489	0.16083589	0.15116067	489	129097763	126858581
489.2	0.16109324	0.15116067	489.2	129081571	126840381
489.4	0.16143273	0.15116067	489.4	129059765	126822184
489.6	0.16132593	0.15116067	489.6	129024436	126803989
489.8	0.16132614	0.15116067	489.8	128988113	126785797
490	0.16102678	0.15116067	490	128894721	126767608
490.2	0.16134464	0.15116067	490.2	128818293	126749421
490.4	0.1612445	0.15116067	490.4	128758237	126731237
490.6	0.16135502	0.15116067	490.6	1287294	126713056
490.8	0.16101656	0.15116067	490.8	128676694	126694877
491	0.16144675	0.15116067	491	12870146	126676701
491.2	0.16127096	0.15116067	491.2	128698546	126658527
491.4	0.16134961	0.15116067	491.4	128696524	126640356
491.6	0.1616861	0.15116067	491.6	128723664	126622188
491.8	0.16133726	0.15116067	491.8	128711396	126604022
492	0.16150738	0.15116067	492	128672642	126585859
492.2	0.16159331	0.15116067	492.2	128632847	126567698
492.4	0.16150472	0.15116067	492.4	12858618	12654954
492.6	0.16118964	0.15116067	492.6	128605036	126531385
492.8	0.16101097	0.15116067	492.8	128585417	126513232
493	0.16065145	0.15116067	493	128578197	126495082
493.2	0.16067776	0.15116067	493.2	128573997	126476934
493.4	0.16062798	0.15116067	493.4	128559417	126458789
493.6	0.16111057	0.15116067	493.6	128564172	126440647
493.8	0.16175618	0.15116067	493.8	128575068	126422507
494	0.16177417	0.15116067	494	128510912	12640437
494.2	0.16196701	0.15116067	494.2	128481597	126386235
494.4	0.16242505	0.15116067	494.4	128470019	126368103
494.6	0.16297308	0.15116067	494.6	128424158	126349974
494.8	0.16206857	0.15116067	494.8	128292021	126331847
495	0.16200452	0.15116067	495	128287618	126313723
495.2	0.16188963	0.15116067	495.2	1282279	126295601
495.4	0.16261794	0.15116067	495.4	128215636	126277482
495.6	0.16277167	0.15116067	495.6	128219347	126259366
495.8	0.16224489	0.15116067	495.8	128144768	126241252
496	0.16214307	0.15116067	496	128079316	126223141
496.2	0.16136222	0.15116067	496.2	127990887	126205032
496.4	0.16036751	0.15116067	496.4	127930426	126186926
496.6	0.15974454	0.15116067	496.6	127928652	126168823
496.8	0.15943618	0.15116067	496.8	127895763	126150722
497	0.15903295	0.15116067	497	127860411	126132624
497.2	0.15888622	0.15116067	497.2	127814824	126114528
497.4	0.1597099	0.15116067	497.4	127877767	126096435
497.6	0.1604708	0.15116067	497.6	127897133	126078345
497.8	0.16156779	0.15116067	497.8	127902054	126060257
498	0.16158585	0.15116067	498	127822696	126042172
498.2	0.1623015	0.15116067	498.2	127798163	126024089
498.4	0.16305478	0.15116067	498.4	127751672	126006009
498.6	0.16286869	0.15116067	498.6	127673658	125987932
498.8	0.16300971	0.15116067	498.8	127619802	125969857
499	0.16407646	0.15116067	499	127658207	125951785
499.2	0.16524828	0.15116067	499.2	127640168	125933715
499.4	0.16555193	0.15116067	499.4	12763263	125915648
499.6	0.1656454	0.15116067	499.6	127606022	125897583
499.8	0.16522872	0.15116067	499.8	127556066	125879522
500	0.16508931	0.15116067	500	127563365	125861462
500.2	0.16464551	0.15116067	500.2	127560869	125843406
500.4	0.16478498	0.15116067	500.4	127599922	125825351
500.6	0.16467986	0.15116067	500.6	127570918	1258073
500.8	0.16454532	0.15116067	500.8	127589761	125789251
501	0.16413235	0.15116067	501	127603954	125771205
501.2	0.16429672	0.15116067	501.2	127631491	125753161
501.4	0.16495721	0.15116067	501.4	127696865	12573512
501.6	0.16506435	0.15116067	501.6	127680649	125717081
501.8	0.16555928	0.15116067	501.8	127670861	125699045
502	0.16520035	0.15116067	502	127578718	125681012
502.2	0.16521433	0.15116067	502.2	12755207	125662981
502.4	0.16502639	0.15116067	502.4	127537673	125644953
502.6	0.16498609	0.15116067	502.6	127519578	125626927
502.8	0.16514661	0.15116067	502.8	127461192	125608904
503	0.16551232	0.15116067	503	127394751	125590884
503.2	0.16586966	0.15116067	503.2	127356113	125572866
503.4	0.16547231	0.15116067	503.4	127300108	125554851
503.6	0.16577708	0.15116067	503.6	127217566	125536838
503.8	0.16538884	0.15116067	503.8	127150427	125518828
504	0.16574149	0.15116067	504	127122755	12550082
504.2	0.16601651	0.15116067	504.2	127111334	125482815
504.4	0.16611243	0.15116067	504.4	127072078	125464813
504.6	0.16601202	0.15116067	504.6	127048347	125446813
504.8	0.1658572	0.15116067	504.8	127062118	125428816
505	0.16555367	0.15116067	505	127015096	125410821
505.2	0.16618807	0.15116067	505.2	126981338	125392829
505.4	0.16576159	0.15116067	505.4	126944561	12537484
505.6	0.16555853	0.15116067	505.6	126920313	125356853
505.8	0.16575571	0.15116067	505.8	126908534	125338869
506	0.16573469	0.15116067	506	126857201	125320887
506.2	0.16601067	0.15116067	506.2	126828198	125302908
506.4	0.16574018	0.15116067	506.4	126783916	125284931
506.6	0.16568088	0.15116067	506.6	126754717	125266957
506.8	0.16614396	0.15116067	506.8	126731834	125248986
507	0.16670899	0.15116067	507	126723968	125231017
507.2	0.16728575	0.15116067	507.2	126730563	125213051
507.4	0.16688396	0.15116067	507.4	126627973	125195087
507.6	0.16702445	0.15116067	507.6	126592493	125177126
507.8	0.16669	0.15116067	507.8	126573977	125159167
508	0.16716622	0.15116067	508	126598927	125141211
508.2	0.1669625	0.15116067	508.2	126637992	125123258
508.4	0.16683725	0.15116067	508.4	126619359	125105307
508.6	0.16677102	0.15116067	508.6	126602769	125087359
508.8	0.16676733	0.15116067	508.8	126579289	125069413
509	0.16672772	0.15116067	509	126536167	12505147
509.2	0.16677087	0.15116067	509.2	126518013	12503353
509.4	0.16614045	0.15116067	509.4	126513442	125015592
509.6	0.16629972	0.15116067	509.6	126491766	124997657
509.8	0.1666339	0.15116067	509.8	126452379	124979724
510	0.16648029	0.15116067	510	126354164	124961794
510.2	0.16602947	0.15116067	510.2	126274351	124943866
510.4	0.16581856	0.15116067	510.4	126250454	124925941
510.6	0.16614294	0.15116067	510.6	126249718	124908018
510.8	0.16656508	0.15116067	510.8	126199306	124890099
511	0.16636741	0.15116067	511	12611228	124872181
511.2	0.16611254	0.15116067	511.2	126031879	124854266
511.4	0.16524052	0.15116067	511.4	125967345	124836354
511.6	0.16510619	0.15116067	511.6	125938401	124818445
511.8	0.16509134	0.15116067	511.8	125885338	124800538
512	0.16526129	0.15116067	512	12587162	124782633
512.2	0.16552367	0.15116067	512.2	125872019	124764731
512.4	0.16523193	0.15116067	512.4	125817685	124746832
512.6	0.16589913	0.15116067	512.6	12582734	124728935
512.8	0.16679063	0.15116067	512.8	125881575	124711041
513	0.16736542	0.15116067	513	125891308	124693149
513.2	0.16762543	0.15116067	513.2	125919291	12467526
513.4	0.16803454	0.15116067	513.4	125971186	124657374
513.6	0.1690638	0.15116067	513.6	126003528	12463949
513.8	0.1692735	0.15116067	513.8	125977854	124621608
514	0.16963887	0.15116067	514	125993054	124603729
514.2	0.16984105	0.15116067	514.2	125983564	124585853
514.4	0.17068722	0.15116067	514.4	126016547	124567979
514.6	0.17096204	0.15116067	514.6	126035824	124550108
514.8	0.17065399	0.15116067	514.8	12599687	12453224
515	0.17018752	0.15116067	515	125966573	124514374
515.2	0.16936682	0.15116067	515.2	125910596	12449651
515.4	0.1694062	0.15116067	515.4	125910389	124478649
515.6	0.16924293	0.15116067	515.6	125816239	124460791
515.8	0.16840909	0.15116067	515.8	12573259	124442935
516	0.16834333	0.15116067	516	125727664	124425082
516.2	0.16810577	0.15116067	516.2	125690202	124407232
516.4	0.16760443	0.15116067	516.4	125647758	124389383
516.6	0.16831222	0.15116067	516.6	125681969	124371538
516.8	0.16830288	0.15116067	516.8	125677309	124353695
517	0.16873745	0.15116067	517	12568047	124335855
517.2	0.16889771	0.15116067	517.2	125670501	124318017
517.4	0.16959296	0.15116067	517.4	12565499	124300182
517.6	0.16972768	0.15116067	517.6	12555165	124282349
517.8	0.16956886	0.15116067	517.8	125493042	124264519
518	0.1699899	0.15116067	518	125469286	124246691
518.2	0.17030552	0.15116067	518.2	125455468	124228866
518.4	0.17068134	0.15116067	518.4	125466266	124211044
518.6	0.17062629	0.15116067	518.6	12544394	124193224
518.8	0.17039748	0.15116067	518.8	125365312	124175406
519	0.17004219	0.15116067	519	125303662	124157592
519.2	0.17020026	0.15116067	519.2	125275849	124139779
519.4	0.17069049	0.15116067	519.4	125256928	12412197
519.6	0.16986006	0.15116067	519.6	125189228	124104162
519.8	0.16948148	0.15116067	519.8	125180515	124086358
520	0.16968056	0.15116067	520	125219083	124068556
520.2	0.16924834	0.15116067	520.2	125201435	124050756
520.4	0.1692888	0.15116067	520.4	125186995	124032959
520.6	0.16945267	0.15116067	520.6	125189311	124015165
520.8	0.1695991	0.15116067	520.8	12519638	123997373
521	0.17022329	0.15116067	521	125172346	123979584
521.2	0.17006353	0.15116067	521.2	125124099	123961797
521.4	0.16980769	0.15116067	521.4	125065066	123944013
521.6	0.16936879	0.15116067	521.6	124997753	123926232
521.8	0.16911955	0.15116067	521.8	124958818	123908452
522	0.16893719	0.15116067	522	124909022	123890676
522.2	0.16935031	0.15116067	522.2	12489098	123872902
522.4	0.16929337	0.15116067	522.4	124818879	123855131
522.6	0.16920197	0.15116067	522.6	124776872	123837362
522.8	0.16903251	0.15116067	522.8	124703594	123819595
523	0.16934383	0.15116067	523	124697874	123801832
523.2	0.1698606	0.15116067	523.2	124684733	12378407
523.4	0.17005301	0.15116067	523.4	12465271	123766312
523.6	0.17031235	0.15116067	523.6	12467125	123748556
523.8	0.17085956	0.15116067	523.8	124650144	123730802
524	0.1706957	0.15116067	524	124638052	123713051
524.2	0.17082358	0.15116067	524.2	124663643	123695303
524.4	0.17067213	0.15116067	524.4	12462464	123677557
524.6	0.17095368	0.15116067	524.6	124624337	123659813
524.8	0.17118549	0.15116067	524.8	124663744	123642072
525	0.17117281	0.15116067	525	124647046	123624334
525.2	0.17038585	0.15116067	525.2	124611119	123606598
525.4	0.17013545	0.15116067	525.4	124587997	123588865
525.6	0.16993366	0.15116067	525.6	124558934	123571135
525.8	0.16977615	0.15116067	525.8	124548761	123553406
526	0.16996438	0.15116067	526	124540839	123535681
526.2	0.17011867	0.15116067	526.2	124516962	123517958
526.4	0.17003144	0.15116067	526.4	124454827	123500237
526.6	0.17011173	0.15116067	526.6	124439101	123482519
526.8	0.17047682	0.15116067	526.8	124450072	123464804
527	0.17078672	0.15116067	527	124462801	123447091
527.2	0.1709509	0.15116067	527.2	124411575	123429381
527.4	0.17169369	0.15116067	527.4	124418841	123411673
527.6	0.17206691	0.15116067	527.6	124379249	123393968
527.8	0.17191638	0.15116067	527.8	124322431	123376265
528	0.17188554	0.15116067	528	124313624	123358565
528.2	0.17183066	0.15116067	528.2	124332687	123340867
528.4	0.17167587	0.15116067	528.4	124255187	123323172
528.6	0.17188907	0.15116067	528.6	124208485	12330548
528.8	0.17146662	0.15116067	528.8	124153204	12328779
529	0.17142391	0.15116067	529	124118768	123270102
529.2	0.17155998	0.15116067	529.2	124083713	123252417
529.4	0.17189311	0.15116067	529.4	124038696	123234735
529.6	0.17191193	0.15116067	529.6	123998978	123217055
529.8	0.17236992	0.15116067	529.8	124018714	123199378
530	0.17181008	0.15116067	530	123948745	123181703
530.2	0.17165738	0.15116067	530.2	123922402	123164031
530.4	0.17162233	0.15116067	530.4	12388126	123146361
530.6	0.1719029	0.15116067	530.6	123899007	123128694
530.8	0.17169417	0.15116067	530.8	123893891	123111029
531	0.17130242	0.15116067	531	123836662	123093367
531.2	0.17106475	0.15116067	531.2	123783215	123075708
531.4	0.17130523	0.15116067	531.4	123817593	123058051
531.6	0.17101628	0.15116067	531.6	12378645	123040396
531.8	0.17080284	0.15116067	531.8	12376622	123022744
532	0.17108193	0.15116067	532	123752518	123005095
532.2	0.17093492	0.15116067	532.2	123740284	122987448
532.4	0.1715394	0.15116067	532.4	123707814	122969803
532.6	0.17207439	0.15116067	532.6	123701008	122952161
532.8	0.17255089	0.15116067	532.8	123714301	122934522
533	0.17359772	0.15116067	533	123749748	122916885
533.2	0.17473574	0.15116067	533.2	123789717	122899251
533.4	0.17524205	0.15116067	533.4	12380217	122881619
533.6	0.17582511	0.15116067	533.6	123810415	12286399
533.8	0.1766201	0.15116067	533.8	123853027	122846364
534	0.1766973	0.15116067	534	123799034	122828739
534.2	0.17685706	0.15116067	534.2	123776999	122811118
534.4	0.17724732	0.15116067	534.4	123795581	122793499
534.6	0.17735697	0.15116067	534.6	123778761	122775882
534.8	0.17705943	0.15116067	534.8	123719516	122758268
535	0.17684703	0.15116067	535	123692757	122740657
535.2	0.17698629	0.15116067	535.2	123656849	122723048
535.4	0.17707947	0.15116067	535.4	123634194	122705441
535.6	0.17630748	0.15116067	535.6	123512851	122687837
535.8	0.17603653	0.15116067	535.8	123446781	122670236
536	0.17584479	0.15116067	536	123371253	122652637
536.2	0.17563544	0.15116067	536.2	123315754	122635041
536.4	0.1763127	0.15116067	536.4	123304432	122617447
536.6	0.17601404	0.15116067	536.6	123256425	122599856
536.8	0.17595413	0.15116067	536.8	123228467	122582267
537	0.17622447	0.15116067	537	123225673	122564681
537.2	0.17661488	0.15116067	537.2	123273288	122547097
537.4	0.17629336	0.15116067	537.4	123244083	122529516
537.6	0.17573015	0.15116067	537.6	123158227	122511937
537.8	0.17546228	0.15116067	537.8	123166889	122494361
538	0.17516438	0.15116067	538	123125434	122476787
538.2	0.17495954	0.15116067	538.2	123167405	122459216
538.4	0.17503316	0.15116067	538.4	123213141	122441648
538.6	0.17458442	0.15116067	538.6	123151168	122424081
538.8	0.17455845	0.15116067	538.8	123112767	122406518
539	0.17464429	0.15116067	539	123096083	122388957
539.2	0.17515628	0.15116067	539.2	123053602	122371398
539.4	0.17490296	0.15116067	539.4	122983719	122353842
539.6	0.17487766	0.15116067	539.6	122910468	122336289
539.8	0.17551744	0.15116067	539.8	12289834	122318738
540	0.17518857	0.15116067	540	122774524	122301189
540.2	0.17556229	0.15116067	540.2	122751644	122283644
540.4	0.17563426	0.15116067	540.4	122674356	1222661
540.6	0.17555395	0.15116067	540.6	122635821	122248559
540.8	0.17551903	0.15116067	540.8	122591949	122231021
541	0.17620577	0.15116067	541	12262095	122213485
541.2	0.17619542	0.15116067	541.2	122577147	122195952
541.4	0.17606028	0.15116067	541.4	122569737	122178421
541.6	0.17565304	0.15116067	541.6	122547883	122160893
541.8	0.17577181	0.15116067	541.8	122602935	122143367
542	0.17615491	0.15116067	542	122639582	122125844
542.2	0.17658486	0.15116067	542.2	122694758	122108323
542.4	0.17666492	0.15116067	542.4	122684234	122090804
542.6	0.17667411	0.15116067	542.6	122667536	122073289
542.8	0.17734105	0.15116067	542.8	122699773	122055776
543	0.17747673	0.15116067	543	122680379	122038265
543.2	0.17754022	0.15116067	543.2	122629911	122020757
543.4	0.17767209	0.15116067	543.4	122603314	122003251
543.6	0.17794164	0.15116067	543.6	122586571	121985748
543.8	0.17775657	0.15116067	543.8	122576979	121968247
544	0.17753808	0.15116067	544	122511297	121950749
544.2	0.17704447	0.15116067	544.2	122447941	121933253
544.4	0.17639372	0.15116067	544.4	122366384	12191576
544.6	0.17687302	0.15116067	544.6	122381601	12189827
544.8	0.17631127	0.15116067	544.8	122299856	121880781
545	0.17658668	0.15116067	545	122234295	121863296
545.2	0.17602234	0.15116067	545.2	122164496	121845813
545.4	0.17626292	0.15116067	545.4	122196318	121828332
545.6	0.1762984	0.15116067	545.6	122198617	121810854
545.8	0.17674174	0.15116067	545.8	122222348	121793378
546	0.17714186	0.15116067	546	122211096	121775905
546.2	0.17726077	0.15116067	546.2	12220805	121758435
546.4	0.17738675	0.15116067	546.4	122200251	121740967
546.6	0.17801457	0.15116067	546.6	122231255	121723501
546.8	0.17811279	0.15116067	546.8	122183361	121706038
547	0.1778856	0.15116067	547	122134685	121688578
547.2	0.17801778	0.15116067	547.2	122099216	12167112
547.4	0.17805194	0.15116067	547.4	1220858	121653664
547.6	0.1781848	0.15116067	547.6	122099165	121636211
547.8	0.17798217	0.15116067	547.8	122088517	121618761
548	0.17796693	0.15116067	548	122032076	121601313
548.2	0.17731196	0.15116067	548.2	121952591	121583867
548.4	0.17730883	0.15116067	548.4	121941493	121566424
548.6	0.17768161	0.15116067	548.6	12189129	121548983
548.8	0.17735945	0.15116067	548.8	121859642	121531545
549	0.17743729	0.15116067	549	121794716	12151411
549.2	0.17788451	0.15116067	549.2	121806813	121496677
549.4	0.17834456	0.15116067	549.4	121820971	121479246
549.6	0.17844335	0.15116067	549.6	121797949	121461818
549.8	0.17832728	0.15116067	549.8	121759262	121444393
550	0.17846723	0.15116067	550	121715577	12142697
550.2	0.17815049	0.15116067	550.2	121728673	121409549
550.4	0.17878266	0.15116067	550.4	121704976	121392131
550.6	0.17925919	0.15116067	550.6	121730858	121374716
550.8	0.17926074	0.15116067	550.8	121673043	121357303
551	0.1792136	0.15116067	551	121590472	121339892
551.2	0.17906415	0.15116067	551.2	121540323	121322484
551.4	0.17872583	0.15116067	551.4	121483035	121305079
551.6	0.17876106	0.15116067	551.6	121500287	121287676
551.8	0.1787472	0.15116067	551.8	121466528	121270275
552	0.17874307	0.15116067	552	121458244	121252877
552.2	0.17906946	0.15116067	552.2	121455244	121235482
552.4	0.17923439	0.15116067	552.4	121481072	121218089
552.6	0.17975862	0.15116067	552.6	121514149	121200698
552.8	0.18003167	0.15116067	552.8	121524379	12118331
553	0.18023747	0.15116067	553	121480851	121165925
553.2	0.18039432	0.15116067	553.2	121486975	121148542
553.4	0.1799727	0.15116067	553.4	121456842	121131161
553.6	0.17983993	0.15116067	553.6	121430056	121113783
553.8	0.1799717	0.15116067	553.8	121425158	121096407
554	0.18038541	0.15116067	554	121414411	121079034
554.2	0.18043848	0.15116067	554.2	121404884	121061664
554.4	0.18106535	0.15116067	554.4	121393118	121044296
554.6	0.18108872	0.15116067	554.6	121374225	12102693
554.8	0.18098922	0.15116067	554.8	121321938	121009567
555	0.18035976	0.15116067	555	121212558	120992206
555.2	0.18039124	0.15116067	555.2	12121186	120974848
555.4	0.17994817	0.15116067	555.4	121152993	120957493
555.6	0.17964041	0.15116067	555.6	121147956	120940139
555.8	0.17952961	0.15116067	555.8	121141597	120922789
556	0.17908477	0.15116067	556	121095958	120905441
556.2	0.1794938	0.15116067	556.2	121072605	120888095
556.4	0.17889231	0.15116067	556.4	121012588	120870752
556.6	0.17870789	0.15116067	556.6	120941945	120853411
556.8	0.17880899	0.15116067	556.8	120874233	120836073
557	0.17910853	0.15116067	557	1208924	120818737
557.2	0.1791728	0.15116067	557.2	120876195	120801404
557.4	0.17974345	0.15116067	557.4	120892911	120784073
557.6	0.18015466	0.15116067	557.6	12089401	120766745
557.8	0.18069422	0.15116067	557.8	120882453	120749419
558	0.18174161	0.15116067	558	120920947	120732096
558.2	0.18193274	0.15116067	558.2	12090541	120714775
558.4	0.18230888	0.15116067	558.4	120908062	120697457
558.6	0.1820028	0.15116067	558.6	120888946	120680141
558.8	0.18150843	0.15116067	558.8	120832408	120662827
559	0.18134249	0.15116067	559	120810468	120645517
559.2	0.18111099	0.15116067	559.2	120814478	120628208
559.4	0.18058339	0.15116067	559.4	120819724	120610902
559.6	0.18025201	0.15116067	559.6	120818981	120593599
559.8	0.17971318	0.15116067	559.8	120783573	120576298
560	0.17917257	0.15116067	560	120704872	120558999
560.2	0.17921722	0.15116067	560.2	120664007	120541703
560.4	0.17881136	0.15116067	560.4	120594161	12052441
560.6	0.17902564	0.15116067	560.6	1205801	120507119
560.8	0.17944776	0.15116067	560.8	120566318	12048983
561	0.17973332	0.15116067	561	120614701	120472544
561.2	0.1800167	0.15116067	561.2	120575769	120455261
561.4	0.1807141	0.15116067	561.4	12057456	12043798
561.6	0.18067456	0.15116067	561.6	120535689	120420701
561.8	0.18154454	0.15116067	561.8	120532601	120403425
562	0.18256062	0.15116067	562	120589814	120386151
562.2	0.18212313	0.15116067	562.2	120509252	12036888
562.4	0.18253501	0.15116067	562.4	120517116	120351611
562.6	0.18246689	0.15116067	562.6	120506296	120334345
562.8	0.18272934	0.15116067	562.8	120470782	120317081
563	0.18337109	0.15116067	563	120527861	12029982
563.2	0.18381869	0.15116067	563.2	120525579	120282561
563.4	0.18352577	0.15116067	563.4	120507656	120265305
563.6	0.18323669	0.15116067	563.6	120461211	120248051
563.8	0.18308588	0.15116067	563.8	120462829	1202308
564	0.1822907	0.15116067	564	120428276	120213551
564.2	0.18177843	0.15116067	564.2	120386952	120196304
564.4	0.18173973	0.15116067	564.4	120375703	120179061
564.6	0.18122889	0.15116067	564.6	120365854	120161819
564.8	0.1808794	0.15116067	564.8	120289646	12014458
565	0.18075837	0.15116067	565	120286314	120127344
565.2	0.18079185	0.15116067	565.2	120195695	120110109
565.4	0.18065483	0.15116067	565.4	120174755	120092878
565.6	0.18065175	0.15116067	565.6	12014624	120075649
565.8	0.18089193	0.15116067	565.8	120144867	120058422
566	0.18108822	0.15116067	566	120170047	120041198
566.2	0.18092531	0.15116067	566.2	120113937	120023976
566.4	0.18176871	0.15116067	566.4	120182934	120006757
566.6	0.18244561	0.15116067	566.6	120161153	11998954
566.8	0.18305233	0.15116067	566.8	120125173	119972326
567	0.18345885	0.15116067	567	120097921	119955114
567.2	0.18362628	0.15116067	567.2	120018756	119937905
567.4	0.18393384	0.15116067	567.4	119995501	119920698
567.6	0.18445733	0.15116067	567.6	120013685	119903494
567.8	0.18469416	0.15116067	567.8	120035121	119886292
568	0.18453045	0.15116067	568	119992416	119869092
568.2	0.18430777	0.15116067	568.2	119918301	119851895
568.4	0.18455982	0.15116067	568.4	119886738	119834701
568.6	0.18447003	0.15116067	568.6	11986497	119817509
568.8	0.18408779	0.15116067	568.8	119784589	119800319
569	0.1841689	0.15116067	569	119820674	119783132
569.2	0.18378504	0.15116067	569.2	1197991	119765947
569.4	0.1835152	0.15116067	569.4	119838482	119748765
569.6	0.1839628	0.15116067	569.6	119874284	119731585
569.8	0.18375445	0.15116067	569.8	119880249	119714408
570	0.18381739	0.15116067	570	119902022	119697233
570.2	0.18389794	0.15116067	570.2	119900147	119680061
570.4	0.18432479	0.15116067	570.4	119914811	119662891
570.6	0.18383317	0.15116067	570.6	119830989	119645724
570.8	0.18385008	0.15116067	570.8	119800178	119628559
571	0.18352925	0.15116067	571	119770598	119611396
571.2	0.18357467	0.15116067	571.2	119721839	119594236
571.4	0.18395436	0.15116067	571.4	119777551	119577079
571.6	0.18355486	0.15116067	571.6	119720217	119559923
571.8	0.18373855	0.15116067	571.8	119665677	119542771
572	0.18340667	0.15116067	572	119575164	119525621
572.2	0.18264055	0.15116067	572.2	119452774	119508473
572.4	0.18278946	0.15116067	572.4	11941851	119491328
572.6	0.18245972	0.15116067	572.6	119365019	119474185
572.8	0.18222127	0.15116067	572.8	119274012	119457044
573	0.18204828	0.15116067	573	119271484	119439907
573.2	0.18232103	0.15116067	573.2	119235831	119422771
573.4	0.18297789	0.15116067	573.4	119273588	119405638
573.6	0.1834984	0.15116067	573.6	11931157	119388508
573.8	0.18336648	0.15116067	573.8	119277107	11937138
574	0.18361359	0.15116067	574	119303033	119354254
574.2	0.18371021	0.15116067	574.2	119274862	119337131
574.4	0.1836868	0.15116067	574.4	119243598	11932001
574.6	0.18388821	0.15116067	574.6	119251817	119302892
574.8	0.18423948	0.15116067	574.8	119255812	119285776
575	0.18457561	0.15116067	575	119269144	119268663
575.2	0.18532672	0.15116067	575.2	119312653	119251552
575.4	0.18549188	0.15116067	575.4	119323667	119234444
575.6	0.18588684	0.15116067	575.6	119267616	119217338
575.8	0.18653562	0.15116067	575.8	119271979	119200234
576	0.18634537	0.15116067	576	119257416	119183133
576.2	0.18624266	0.15116067	576.2	119207366	119166034
576.4	0.18650865	0.15116067	576.4	119159666	119148938
576.6	0.18674013	0.15116067	576.6	119121243	119131845
576.8	0.18652858	0.15116067	576.8	119066874	119114753
577	0.18595837	0.15116067	577	119035728	119097665
577.2	0.18670679	0.15116067	577.2	119068165	119080578
577.4	0.18672523	0.15116067	577.4	119145732	119063494
577.6	0.18630606	0.15116067	577.6	119140267	119046413
577.8	0.18579084	0.15116067	577.8	119087805	119029334
578	0.185354	0.15116067	578	119024112	119012258
578.2	0.18457726	0.15116067	578.2	11896109	118995183
578.4	0.18454966	0.15116067	578.4	118965732	118978112
578.6	0.18472186	0.15116067	578.6	118958837	118961043
578.8	0.18453027	0.15116067	578.8	118911327	118943976
579	0.18506844	0.15116067	579	118915638	118926912
579.2	0.18514768	0.15116067	579.2	118895162	11890985
579.4	0.18511967	0.15116067	579.4	118871135	11889279
579.6	0.18579108	0.15116067	579.6	118864046	118875733
579.8	0.1860111	0.15116067	579.8	118844112	118858679
580	0.18615459	0.15116067	580	118769702	118841627
580.2	0.18655251	0.15116067	580.2	11873969	118824577
580.4	0.18682	0.15116067	580.4	118667948	11880753
580.6	0.18711177	0.15116067	580.6	118613572	118790486
580.8	0.18676306	0.15116067	580.8	11857686	118773443
581	0.18689872	0.15116067	581	118529152	118756403
581.2	0.18718881	0.15116067	581.2	118547805	118739366
581.4	0.18682817	0.15116067	581.4	118549634	118722331
581.6	0.18659668	0.15116067	581.6	118501098	118705299
581.8	0.18621285	0.15116067	581.8	118430766	118688269
582	0.18598173	0.15116067	582	118420673	118671241
582.2	0.18633984	0.15116067	582.2	118462603	118654216
582.4	0.18637873	0.15116067	582.4	118481184	118637193
582.6	0.18676316	0.15116067	582.6	118498969	118620173
582.8	0.1868919	0.15116067	582.8	11850025	118603155
583	0.18711897	0.15116067	583	118508039	11858614
583.2	0.18717194	0.15116067	583.2	118539279	118569127
583.4	0.18721577	0.15116067	583.4	118521896	118552116
583.6	0.18729588	0.15116067	583.6	118514467	118535108
583.8	0.18738498	0.15116067	583.8	118525616	118518103
584	0.18746733	0.15116067	584	118484339	118501099
584.2	0.18737408	0.15116067	584.2	118452561	118484099
584.4	0.18702698	0.15116067	584.4	118321487	1184671
584.6	0.18720653	0.15116067	584.6	118264065	118450104
584.8	0.18688317	0.15116067	584.8	118242742	118433111
585	0.18683339	0.15116067	585	118221379	11841612
585.2	0.18648834	0.15116067	585.2	118212979	118399132
585.4	0.18650675	0.15116067	585.4	118150966	118382145
585.6	0.18667097	0.15116067	585.6	118063721	118365162
585.8	0.18658823	0.15116067	585.8	117976192	11834818
586	0.18679108	0.15116067	586	117963358	118331202
586.2	0.18701184	0.15116067	586.2	117883847	118314225
586.4	0.18659653	0.15116067	586.4	117832351	118297251
586.6	0.18715994	0.15116067	586.6	117844828	11828028
586.8	0.18668376	0.15116067	586.8	117840744	118263311
587	0.18668784	0.15116067	587	11785301	118246344
587.2	0.18673299	0.15116067	587.2	117889518	11822938
587.4	0.18671366	0.15116067	587.4	117866123	118212418
587.6	0.18679849	0.15116067	587.6	117918405	118195459
587.8	0.18668157	0.15116067	587.8	117895234	118178502
588	0.18621764	0.15116067	588	117811956	118161548
588.2	0.18625476	0.15116067	588.2	117765508	118144596
588.4	0.18596701	0.15116067	588.4	117725529	118127646
588.6	0.18607928	0.15116067	588.6	117751732	118110699
588.8	0.18626999	0.15116067	588.8	117789395	118093754
589	0.18692813	0.15116067	589	117832336	118076812
589.2	0.18626803	0.15116067	589.2	117748116	118059872
589.4	0.18624946	0.15116067	589.4	117667103	118042934
589.6	0.18645652	0.15116067	589.6	11763801	118025999
589.8	0.18638923	0.15116067	589.8	117577027	118009067
590	0.18633635	0.15116067	590	11752567	117992137
590.2	0.18658049	0.15116067	590.2	117488001	117975209
590.4	0.18676113	0.15116067	590.4	117454113	117958284
590.6	0.18689523	0.15116067	590.6	117472304	117941361
590.8	0.18695371	0.15116067	590.8	117501253	11792444
591	0.18751769	0.15116067	591	117502023	117907522
591.2	0.18817722	0.15116067	591.2	117518579	117890607
591.4	0.18833208	0.15116067	591.4	117463398	117873694
591.6	0.18838193	0.15116067	591.6	117438151	117856783
591.8	0.18858733	0.15116067	591.8	117391796	117839875
592	0.18883988	0.15116067	592	117419566	117822969
592.2	0.18905995	0.15116067	592.2	117412718	117806065
592.4	0.1887949	0.15116067	592.4	117364852	117789164
592.6	0.18963968	0.15116067	592.6	117390606	117772266
592.8	0.18988487	0.15116067	592.8	117366773	117755369
593	0.18975468	0.15116067	593	117345518	117738476
593.2	0.18878282	0.15116067	593.2	117292428	117721584
593.4	0.1885411	0.15116067	593.4	117273167	117704695
593.6	0.18843042	0.15116067	593.6	117268462	117687809
593.8	0.188039	0.15116067	593.8	117208159	117670925
594	0.1880467	0.15116067	594	117223899	117654043
594.2	0.18776484	0.15116067	594.2	117205874	117637164
594.4	0.18778448	0.15116067	594.4	117216603	117620287
594.6	0.18785139	0.15116067	594.6	11726401	117603413
594.8	0.18839163	0.15116067	594.8	117244146	117586541
595	0.18887422	0.15116067	595	117235521	117569671
595.2	0.18919565	0.15116067	595.2	117232294	117552804
595.4	0.18930139	0.15116067	595.4	11720676	11753594
595.6	0.18925141	0.15116067	595.6	117182219	117519077
595.8	0.18961285	0.15116067	595.8	117240032	117502217
596	0.18929276	0.15116067	596	117230528	11748536
596.2	0.18935272	0.15116067	596.2	117170066	117468505
596.4	0.18931503	0.15116067	596.4	117089634	117451652
596.6	0.18939142	0.15116067	596.6	117056317	117434802
596.8	0.1888476	0.15116067	596.8	117043216	117417954
597	0.18859743	0.15116067	597	117009024	117401109
597.2	0.18803486	0.15116067	597.2	116956412	117384266
597.4	0.18765617	0.15116067	597.4	116919816	117367426
597.6	0.18799934	0.15116067	597.6	116906381	117350587
597.8	0.18807094	0.15116067	597.8	116909662	117333752
598	0.18883763	0.15116067	598	116940539	117316919
598.2	0.189299	0.15116067	598.2	116963888	117300088
598.4	0.19059718	0.15116067	598.4	117003594	117283259
598.6	0.19091191	0.15116067	598.6	116945226	117266433
598.8	0.19150376	0.15116067	598.8	116901375	11724961
599	0.19202543	0.15116067	599	116954576	117232788
599.2	0.1920533	0.15116067	599.2	116949699	11721597
599.4	0.1920256	0.15116067	599.4	116921834	117199153
599.6	0.19207093	0.15116067	599.6	116898532	117182339
599.8	0.19202827	0.15116067	599.8	116905574	117165528
600	0.19152054	0.15116067	600	116862302	117148719
600.2	0.19135529	0.15116067	600.2	116815429	117131912
600.4	0.19062954	0.15116067	600.4	116789912	117115108
600.6	0.19025105	0.15116067	600.6	116795582	117098306
600.8	0.18985358	0.15116067	600.8	116742062	117081506
601	0.18990229	0.15116067	601	11670853	117064709
601.2	0.18924982	0.15116067	601.2	116643059	117047914
601.4	0.18934747	0.15116067	601.4	116637619	117031122
601.6	0.18989609	0.15116067	601.6	116648805	117014332
601.8	0.1901854	0.15116067	601.8	116662064	116997545
602	0.19131845	0.15116067	602	11668684	11698076
602.2	0.19157983	0.15116067	602.2	116687076	116963977
602.4	0.19236275	0.15116067	602.4	116679206	116947197
602.6	0.19221135	0.15116067	602.6	11662455	116930419
602.8	0.19262034	0.15116067	602.8	116638055	116913644
603	0.19275649	0.15116067	603	116632851	116896871
603.2	0.1927333	0.15116067	603.2	116601111	1168801
603.4	0.19297733	0.15116067	603.4	116573136	116863332
603.6	0.19298199	0.15116067	603.6	116552192	116846566
603.8	0.19226209	0.15116067	603.8	11653299	116829803
604	0.19216388	0.15116067	604	116569479	116813042
604.2	0.19183637	0.15116067	604.2	116461267	116796283
604.4	0.19187375	0.15116067	604.4	116448349	116779527
604.6	0.19185578	0.15116067	604.6	116382825	116762773
604.8	0.19155745	0.15116067	604.8	116303976	116746022
605	0.19153692	0.15116067	605	11630306	116729273
605.2	0.19046757	0.15116067	605.2	116189918	116712527
605.4	0.19073798	0.15116067	605.4	116213373	116695782
605.6	0.19094249	0.15116067	605.6	116213467	116679041
605.8	0.1908128	0.15116067	605.8	11618386	116662301
606	0.19113539	0.15116067	606	116149846	116645564
606.2	0.19133694	0.15116067	606.2	11608669	11662883
606.4	0.19202354	0.15116067	606.4	116083174	116612098
606.6	0.19208398	0.15116067	606.6	116022232	116595368
606.8	0.19217202	0.15116067	606.8	116061684	116578641
607	0.19221752	0.15116067	607	116063668	116561916
607.2	0.1926139	0.15116067	607.2	116135133	116545193
607.4	0.19273584	0.15116067	607.4	116127094	116528473
607.6	0.19197498	0.15116067	607.6	11605845	116511755
607.8	0.19192221	0.15116067	607.8	116029281	11649504
608	0.19196698	0.15116067	608	115996939	116478327
608.2	0.19181046	0.15116067	608.2	115912032	116461616
608.4	0.19187721	0.15116067	608.4	115921101	116444908
608.6	0.19165669	0.15116067	608.6	115906029	116428203
608.8	0.19165306	0.15116067	608.8	115903152	116411499
609	0.19117294	0.15116067	609	115900614	116394798
609.2	0.19060697	0.15116067	609.2	115816193	1163781
609.4	0.19095679	0.15116067	609.4	115896566	116361404
609.6	0.19132326	0.15116067	609.6	115870973	11634471
609.8	0.19145638	0.15116067	609.8	115891737	116328018
610	0.19253313	0.15116067	610	115889509	116311329
610.2	0.19310011	0.15116067	610.2	115892224	116294643
610.4	0.19341349	0.15116067	610.4	115890934	116277959
610.6	0.19360613	0.15116067	610.6	115887758	116261277
610.8	0.19385696	0.15116067	610.8	115948298	116244597
611	0.19343795	0.15116067	611	115875062	11622792
611.2	0.19360228	0.15116067	611.2	115836037	116211246
611.4	0.19387555	0.15116067	611.4	11578584	116194574
611.6	0.19328929	0.15116067	611.6	115691781	116177904
611.8	0.19326997	0.15116067	611.8	115668622	116161236
612	0.19311249	0.15116067	612	115616544	116144571
612.2	0.19322965	0.15116067	612.2	115563727	116127909
612.4	0.19341272	0.15116067	612.4	115570695	116111248
612.6	0.19374729	0.15116067	612.6	115583991	11609459
612.8	0.19343609	0.15116067	612.8	115551916	116077935
613	0.19298389	0.15116067	613	115518053	116061282
613.2	0.19299564	0.15116067	613.2	115504799	116044631
613.4	0.19293501	0.15116067	613.4	115537228	116027983
613.6	0.19358336	0.15116067	613.6	115546757	116011337
613.8	0.19396196	0.15116067	613.8	115567733	115994693
614	0.1942084	0.15116067	614	115523958	115978052
614.2	0.19414411	0.15116067	614.2	115500622	115961413
614.4	0.19427433	0.15116067	614.4	11552356	115944777
614.6	0.19433561	0.15116067	614.6	115524711	115928143
614.8	0.1940731	0.15116067	614.8	115505417	115911511
615	0.19380115	0.15116067	615	115442525	115894882
615.2	0.19447893	0.15116067	615.2	115443968	115878255
615.4	0.19457754	0.15116067	615.4	115469161	115861631
615.6	0.19435732	0.15116067	615.6	115447534	115845009
615.8	0.19512159	0.15116067	615.8	115489102	115828389
616	0.19536884	0.15116067	616	115480145	115811772
616.2	0.19479062	0.15116067	616.2	115431315	115795157
616.4	0.19515236	0.15116067	616.4	115447939	115778544
616.6	0.19525436	0.15116067	616.6	115453594	115761934
616.8	0.19494009	0.15116067	616.8	11544711	115745326
617	0.19478867	0.15116067	617	115428383	115728721
617.2	0.19470351	0.15116067	617.2	115432853	115712118
617.4	0.19507088	0.15116067	617.4	115380054	115695517
617.6	0.1959142	0.15116067	617.6	11535277	115678919
617.8	0.19561928	0.15116067	617.8	115297178	115662323
618	0.19528482	0.15116067	618	115257484	11564573
618.2	0.19530346	0.15116067	618.2	115278796	115629139
618.4	0.19503254	0.15116067	618.4	115253141	11561255
618.6	0.19531222	0.15116067	618.6	115220403	115595964
618.8	0.19561335	0.15116067	618.8	115160854	11557938
619	0.19602232	0.15116067	619	115140353	115562798
619.2	0.19611124	0.15116067	619.2	115102538	115546219
619.4	0.19590693	0.15116067	619.4	115097255	115529642
619.6	0.19603273	0.15116067	619.6	115085887	115513068
619.8	0.19617429	0.15116067	619.8	115078891	115496496
620	0.19581883	0.15116067	620	115034234	115479926
620.2	0.19554805	0.15116067	620.2	114952586	115463359
620.4	0.19613792	0.15116067	620.4	114974129	115446794
620.6	0.19660096	0.15116067	620.6	115040137	115430231
620.8	0.19651266	0.15116067	620.8	115070607	115413671
621	0.1966272	0.15116067	621	115061881	115397113
621.2	0.19701589	0.15116067	621.2	115082229	115380558
621.4	0.19783161	0.15116067	621.4	115081805	115364005
621.6	0.19732546	0.15116067	621.6	115044967	115347454
621.8	0.19681449	0.15116067	621.8	11503047	115330906
622	0.19647566	0.15116067	622	114969371	11531436
622.2	0.19622911	0.15116067	622.2	114884893	115297816
622.4	0.19631546	0.15116067	622.4	11483492	115281275
622.6	0.19646172	0.15116067	622.6	114790657	115264736
622.8	0.19641455	0.15116067	622.8	114717752	1152482
623	0.19634026	0.15116067	623	114713257	115231666
623.2	0.19599957	0.15116067	623.2	114617497	115215134
623.4	0.19567191	0.15116067	623.4	11453006	115198605
623.6	0.19551862	0.15116067	623.6	114457765	115182078
623.8	0.19556366	0.15116067	623.8	114425504	115165553
624	0.19562577	0.15116067	624	114348832	115149031
624.2	0.19526182	0.15116067	624.2	114269673	115132511
624.4	0.19513395	0.15116067	624.4	114264156	115115994
624.6	0.19582177	0.15116067	624.6	114330823	115099479
624.8	0.19536349	0.15116067	624.8	114304936	115082966
625	0.1958063	0.15116067	625	114337974	115066455
625.2	0.19554873	0.15116067	625.2	114368708	115049947
625.4	0.19552669	0.15116067	625.4	114398905	115033442
625.6	0.19480332	0.15116067	625.6	114384369	115016939
625.8	0.19498653	0.15116067	625.8	114370149	115000438
626	0.19474112	0.15116067	626	114349402	114983939
626.2	0.1949633	0.15116067	626.2	114333634	114967443
626.4	0.19508664	0.15116067	626.4	114388085	114950949
626.6	0.19515766	0.15116067	626.6	11443448	114934458
626.8	0.19605332	0.15116067	626.8	114473566	114917969
627	0.19646083	0.15116067	627	114495835	114901482
627.2	0.19644401	0.15116067	627.2	114442874	114884998
627.4	0.19669295	0.15116067	627.4	114361166	114868516
627.6	0.19699356	0.15116067	627.6	114365714	114852036
627.8	0.19671531	0.15116067	627.8	114289184	114835559
628	0.19694384	0.15116067	628	114239828	114819084
628.2	0.19708335	0.15116067	628.2	114237753	114802612
628.4	0.1977206	0.15116067	628.4	114241672	114786141
628.6	0.19777847	0.15116067	628.6	114216561	114769674
628.8	0.19746936	0.15116067	628.8	114177303	114753208
629	0.19811135	0.15116067	629	114232469	114736745
629.2	0.19777602	0.15116067	629.2	114232018	114720284
629.4	0.1975954	0.15116067	629.4	114201587	114703826
629.6	0.19731792	0.15116067	629.6	114178091	11468737
629.8	0.1970635	0.15116067	629.8	114157866	114670917
630	0.19695991	0.15116067	630	114151746	114654465
630.2	0.19660492	0.15116067	630.2	114110771	114638016
630.4	0.19629652	0.15116067	630.4	114101985	11462157
630.6	0.19630256	0.15116067	630.6	114109668	114605126
630.8	0.19648511	0.15116067	630.8	114054472	114588684
631	0.19591565	0.15116067	631	114002094	114572245
631.2	0.1961339	0.15116067	631.2	113958841	114555807
631.4	0.19633633	0.15116067	631.4	113953333	114539373
631.6	0.1966735	0.15116067	631.6	113996931	11452294
631.8	0.19708666	0.15116067	631.8	114019718	11450651
632	0.19814775	0.15116067	632	114062998	114490083
632.2	0.1984414	0.15116067	632.2	114061843	114473657
632.4	0.19860326	0.15116067	632.4	114029282	114457234
632.6	0.1986532	0.15116067	632.6	114009532	114440814
632.8	0.19958344	0.15116067	632.8	114052703	114424396
633	0.1999913	0.15116067	633	114100586	11440798
633.2	0.19974719	0.15116067	633.2	114093314	114391566
633.4	0.19948532	0.15116067	633.4	114037696	114375155
633.6	0.1997234	0.15116067	633.6	114039871	114358746
633.8	0.19997218	0.15116067	633.8	114044745	11434234
634	0.19959655	0.15116067	634	114017733	114325936
634.2	0.19875552	0.15116067	634.2	113900594	114309534
634.4	0.1990217	0.15116067	634.4	11389555	114293134
634.6	0.19875783	0.15116067	634.6	113832759	114276737
634.8	0.1989773	0.15116067	634.8	113781325	114260343
635	0.19914719	0.15116067	635	113740389	11424395
635.2	0.19987444	0.15116067	635.2	113759033	11422756
635.4	0.20012136	0.15116067	635.4	113785618	114211173
635.6	0.20039712	0.15116067	635.6	113761895	114194787
635.8	0.20094558	0.15116067	635.8	113759534	114178405
636	0.20091034	0.15116067	636	113716528	114162024
636.2	0.20027791	0.15116067	636.2	113697593	114145646
636.4	0.19994564	0.15116067	636.4	11365256	11412927
636.6	0.1999862	0.15116067	636.6	113628568	114112896
636.8	0.19960117	0.15116067	636.8	113605994	114096525
637	0.19904439	0.15116067	637	113558607	114080156
637.2	0.19897513	0.15116067	637.2	113480785	11406379
637.4	0.19848017	0.15116067	637.4	113427179	114047426
637.6	0.19821782	0.15116067	637.6	113412712	114031064
637.8	0.19832426	0.15116067	637.8	113409563	114014704
638	0.19741682	0.15116067	638	1133511	113998347
638.2	0.19748637	0.15116067	638.2	113317062	113981993
638.4	0.19806054	0.15116067	638.4	113363418	11396564
638.6	0.19790347	0.15116067	638.6	113330881	11394929
638.8	0.19844575	0.15116067	638.8	113323659	113932942
639	0.19870237	0.15116067	639	113327666	113916597
639.2	0.19881477	0.15116067	639.2	113344548	113900254
639.4	0.19929599	0.15116067	639.4	113348831	113883913
[truncated: 1,002 more rows]
