# Supplementary material for: Design of amyloidogenic peptide traps
Source: Nat Chem Biol. 2024 Mar 19;20(8):981–90. doi: 10.1038/s41589-024-01578-5 (PMC11288891; doi:10.1038/s41589-024-01578-5)
Supplement: Supplementary file 12 — Statistical source data. [file 41589_2024_1578_MOESM12_ESM.xlsx]

## Sheet: CH11-P34
Time1	1E-05	2.5E-06	6.25E-07
235	0.00074717	0.00548955	0.00075286		Concentration in all tabs in Molar [M]
235.2	0.00109753	0.00582921	0.00094352
235.4	0.00064309	0.00536565	0.00061593
235.6	0.00058525	0.00532562	0.00051525
235.8	0.0003839	0.00540217	0.00023835
236	0.00025327	0.0053905	0.00041967
236.2	0.00022982	0.00527007	8.48e-05
236.4	-7.547e-05	0.00529535	-9.704e-05
236.6	-0.00015964	0.00465354	-0.00048177
236.8	0.0002633	0.00458337	-0.00036932
237	0.00045055	0.00463168	-0.00036684
237.2	0.00039904	0.00402473	-0.00074873
237.4	0.00085132	0.00403975	-0.00082
237.6	0.00183386	0.00430093	5.196e-05
237.8	0.00211268	0.00473007	0.00010926
238	0.00254257	0.00515459	0.00074432
238.2	0.00257437	0.00586214	0.00139434
238.4	0.00248548	0.00613511	0.00121509
238.6	0.00241855	0.00648189	0.00122585
238.8	0.00250442	0.00628185	0.00102412
239	0.00291792	0.00631786	0.00115007
239.2	0.00312032	0.00628084	0.00136479
239.4	0.00280273	0.00584553	0.00111472
239.6	0.00351669	0.00631958	0.00153377
239.8	0.00367469	0.00663822	0.00196061
240	0.00412193	0.00696287	0.00279205
240.2	0.00405198	0.00709587	0.00269641
240.4	0.00395034	0.00721411	0.00307462
240.6	0.00384152	0.00681991	0.00318794
240.8	0.00391388	0.00692723	0.00358642
241	0.00321343	0.00652362	0.00281813
241.2	0.00262324	0.00565318	0.00235912
241.4	0.00255071	0.00533939	0.00231648
241.6	0.00215155	0.00533244	0.00191102
241.8	0.00196457	0.00544115	0.00153195
242	0.00169384	0.00556228	0.00171772
242.2	0.00115658	0.00567738	0.00132665
242.4	0.00079988	0.00514241	0.0005364
242.6	8.401e-05	0.00469445	-0.00029472
242.8	-0.00027584	0.00456239	-0.00044115
243	-5.62e-05	0.00467301	-0.00022078
243.2	-7.371e-05	0.00440195	-0.00069905
243.4	0.00040955	0.00434099	-0.00077521
243.6	0.00060071	0.00454438	-0.00037669
243.8	0.00087949	0.00476256	2.665e-05
244	0.00123262	0.00518234	0.00046382
244.2	0.00149008	0.00547889	0.00083896
244.4	0.00126212	0.00534376	0.00089308
244.6	0.00092953	0.00527554	0.00093648
244.8	0.00080508	0.00511126	0.00065382
245	0.00088334	0.00502525	0.00055428
245.2	0.00113739	0.00485095	0.00102623
245.4	0.00153281	0.00501349	0.00128574
245.6	0.00213805	0.00539802	0.00140339
245.8	0.00222425	0.00517144	0.00110226
246	0.00249134	0.00556971	0.00161093
246.2	0.00219446	0.00565337	0.00136808
246.4	0.00241257	0.00586631	0.00174981
246.6	0.0020086	0.00524237	0.00151383
246.8	0.00212421	0.005461	0.00180952
247	0.00235453	0.00489137	0.00141017
247.2	0.00259847	0.00514491	0.00052619
247.4	0.00242009	0.00480894	0.00036096
247.6	0.00196587	0.0047855	0.00020616
247.8	0.00176875	0.00458003	-0.00020865
248	0.00211954	0.00539191	0.00020241
248.2	0.00202276	0.0058328	0.00047471
248.4	0.0018042	0.00599004	0.00016485
248.6	0.00183546	0.00649832	0.000211
248.8	0.00173207	0.00618731	-0.00038191
249	0.0024048	0.00607587	0.00021245
249.2	0.0029041	0.00626976	0.00076637
249.4	0.00254505	0.00611225	0.00086201
249.6	0.00265636	0.00611457	0.00107793
249.8	0.00301129	0.00653929	0.0015887
250	0.00349132	0.00697631	0.00250248
250.2	0.0030544	0.00676841	0.00273426
250.4	0.00338245	0.00684444	0.00327443
250.6	0.00357657	0.00639614	0.00329048
250.8	0.00394338	0.0068004	0.00351408
251	0.00372496	0.00611578	0.0027012
251.2	0.00371845	0.00644255	0.00250562
251.4	0.00356449	0.00591206	0.00290114
251.6	0.00338155	0.0062648	0.00243001
251.8	0.00290701	0.00586921	0.00211441
252	0.00325746	0.00638769	0.00230854
252.2	0.00323588	0.00677582	0.00240976
252.4	0.00337427	0.00682355	0.00190197
252.6	0.00316249	0.00656088	0.00150614
252.8	0.0031278	0.00612253	0.00149344
253	0.00365401	0.00606565	0.00224617
253.2	0.00373228	0.00587141	0.00254194
253.4	0.00339577	0.00541917	0.00228021
253.6	0.00364981	0.00540995	0.0026875
253.8	0.00417524	0.00549128	0.0025064
254	0.00352583	0.00495659	0.00192509
254.2	0.00288294	0.00442315	0.00167456
254.4	0.00354108	0.00491737	0.00185273
254.6	0.00394349	0.005134	0.0020214
254.8	0.00343252	0.00497624	0.00140508
255	0.00332701	0.0046247	0.00086366
255.2	0.00351767	0.00511304	0.00154204
255.4	0.00314961	0.00493336	0.00143744
255.6	0.00253992	0.00532312	0.00069605
255.8	0.00218087	0.00498393	0.00102844
256	0.00242306	0.0053603	0.00110143
256.2	0.0025859	0.00561062	0.00115131
256.4	0.00261075	0.0054328	0.00081737
256.6	0.00291958	0.00531849	0.00130036
256.8	0.00335372	0.00565686	0.00178686
257	0.00388166	0.00570629	0.00184848
257.2	0.00442834	0.00540548	0.00164506
257.4	0.00431925	0.00579365	0.00137129
257.6	0.00416303	0.00569166	0.00106333
257.8	0.00436541	0.00580322	0.00062148
258	0.00381571	0.00551565	0.00042932
258.2	0.00400269	0.0060846	0.00051504
258.4	0.00429145	0.00705628	0.00083354
258.6	0.00387459	0.00725166	0.00090484
258.8	0.00303125	0.0069586	0.00078283
259	0.00298847	0.00739377	0.00116395
259.2	0.00215205	0.00748763	0.00129023
259.4	0.00153079	0.00747034	0.00097417
259.6	0.00144255	0.00792084	0.00100084
259.8	0.00153802	0.00780185	0.00125102
260	0.00167322	0.00768881	0.00114965
260.2	0.00211409	0.00753775	0.0014412
260.4	0.00280151	0.00789447	0.0021563
260.6	0.0031578	0.0079182	0.00208203
260.8	0.00353378	0.00810913	0.00190672
261	0.00401459	0.00821213	0.00157707
261.2	0.00434521	0.00804541	0.00149604
261.4	0.00417803	0.00850243	0.00163101
261.6	0.00426369	0.00809386	0.00157951
261.8	0.00411975	0.00778913	0.00128939
262	0.00353381	0.00751829	0.00083042
262.2	0.00358011	0.0079106	0.00084361
262.4	0.00291858	0.0073576	0.00066361
262.6	0.00261273	0.00664556	0.00055333
262.8	0.0020754	0.00589337	0.00025156
263	0.00174183	0.00590651	0.00043937
263.2	0.00163543	0.00512624	6.2e-05
263.4	0.001917	0.00530389	2.15e-06
263.6	0.00193923	0.00465584	0.00024046
263.8	0.00239966	0.00504065	0.0008234
264	0.00289713	0.00517257	0.00163188
264.2	0.00305041	0.00574911	0.00221869
264.4	0.00312003	0.00602289	0.00231988
264.6	0.00285233	0.00601443	0.00206052
264.8	0.00274072	0.00609093	0.00265322
265	0.00313725	0.00639127	0.0031119
265.2	0.0032685	0.00637336	0.00379505
265.4	0.0034211	0.00661463	0.00380847
265.6	0.00344353	0.00655357	0.00349475
265.8	0.00347474	0.0066521	0.00318652
266	0.00345694	0.00671225	0.00312113
266.2	0.00340799	0.00641166	0.00278011
266.4	0.00333104	0.00663453	0.00280213
266.6	0.00355807	0.00624033	0.00291095
266.8	0.0033069	0.00639943	0.00295011
267	0.00353455	0.0064827	0.0027533
267.2	0.00364798	0.00581468	0.00196681
267.4	0.00357265	0.00610494	0.00193776
267.6	0.00340993	0.00527841	0.00153268
267.8	0.00344451	0.00585159	0.00144471
268	0.00313219	0.00558214	0.00150747
268.2	0.00280343	0.00576214	0.00149105
268.4	0.00249659	0.00542607	0.00163138
268.6	0.00201128	0.00566131	0.0019704
268.8	0.00219186	0.00583224	0.00256443
269	0.00281697	0.00665693	0.00312667
269.2	0.00297659	0.00683382	0.00315312
269.4	0.00319552	0.00729609	0.00330723
269.6	0.0033913	0.00765767	0.00363187
269.8	0.00356873	0.00818363	0.00431139
270	0.0036778	0.00809287	0.00428338
270.2	0.00381573	0.00812323	0.00417131
270.4	0.00386231	0.00841796	0.00425823
270.6	0.00427783	0.00833986	0.00430236
270.8	0.00461603	0.00861712	0.00424145
271	0.00501666	0.00820842	0.00366945
271.2	0.00470123	0.00778326	0.00363033
271.4	0.00498613	0.00771303	0.00310171
271.6	0.00423534	0.0067536	0.00182766
271.8	0.004414	0.00685875	0.00186031
272	0.00440774	0.00710576	0.00166313
272.2	0.00448691	0.00735969	0.00147315
272.4	0.00403785	0.00752553	0.00146763
272.6	0.00351184	0.00742223	0.00063122
272.8	0.00363994	0.00763317	0.00074882
273	0.00344047	0.00723266	0.00044466
273.2	0.00332555	0.0069837	0.00040611
273.4	0.00319532	0.00653545	0.00101176
273.6	0.00294324	0.00619861	0.00119528
273.8	0.00272145	0.00579108	0.0009585
274	0.00277405	0.00494055	0.00088456
274.2	0.00311447	0.00472459	0.00133245
274.4	0.00308893	0.00450914	0.00138019
274.6	0.00398187	0.00474128	0.00211076
274.8	0.00429978	0.00456551	0.00255845
275	0.00461197	0.0047734	0.0027931
275.2	0.00436902	0.00454347	0.00297287
275.4	0.0041296	0.00466105	0.00250131
275.6	0.00401721	0.00450026	0.00229909
275.8	0.00423279	0.00478456	0.00230884
276	0.00387872	0.00488757	0.00225851
276.2	0.00420695	0.00501569	0.00223784
276.4	0.0039973	0.00475577	0.00173878
276.6	0.00339593	0.00434644	0.00101116
276.8	0.0036063	0.00491619	0.0012941
277	0.00383149	0.00483828	0.00112627
277.2	0.00408668	0.00521685	0.00166045
277.4	0.00413579	0.00503594	0.00173473
277.6	0.00416447	0.00570153	0.00179537
277.8	0.00437853	0.00581356	0.00197848
278	0.0047577	0.00612528	0.00280163
278.2	0.00519539	0.00684696	0.00314961
278.4	0.00510573	0.00698108	0.0029478
278.6	0.00537057	0.00762147	0.00321218
278.8	0.0057043	0.00830534	0.00319248
279	0.00553029	0.00828084	0.00252529
279.2	0.00509702	0.00779175	0.00234908
279.4	0.00496216	0.00798778	0.00223119
279.6	0.00538841	0.0080661	0.00255843
279.8	0.0048557	0.00813866	0.00261241
280	0.00501627	0.00841337	0.00326992
280.2	0.00511199	0.00798234	0.0030224
280.4	0.00496288	0.0075239	0.00296346
280.6	0.00427913	0.00720103	0.00277285
280.8	0.00418242	0.00673602	0.00241145
281	0.00411296	0.00679743	0.00238898
281.2	0.0042009	0.00670184	0.00268089
281.4	0.00372084	0.00627798	0.00226559
281.6	0.00355044	0.00645325	0.00247634
281.8	0.00363179	0.00600769	0.002591
282	0.00335073	0.00620616	0.00249525
282.2	0.00283334	0.00597123	0.00219367
282.4	0.00276382	0.00561422	0.00160606
282.6	0.00280918	0.00577579	0.00111403
282.8	0.00347017	0.00570952	0.00098136
283	0.00331102	0.00497186	0.00074283
283.2	0.00350183	0.00488207	0.00129655
283.4	0.00407678	0.00539701	0.00181317
283.6	0.00404999	0.00545749	0.00249556
283.8	0.00425516	0.0056163	0.00342814
284	0.00454623	0.00539192	0.00379684
284.2	0.00466889	0.00483249	0.00381057
284.4	0.00450084	0.0048982	0.00433634
284.6	0.00437827	0.0050467	0.00405485
284.8	0.00448649	0.00503462	0.0037762
285	0.00437251	0.0060515	0.00397865
285.2	0.00451882	0.00566718	0.00405702
285.4	0.00418586	0.00535186	0.00345139
285.6	0.00403699	0.00598108	0.00340012
285.8	0.00380692	0.00618415	0.00298181
286	0.00357985	0.00675352	0.00269615
286.2	0.00369579	0.0066465	0.00212935
286.4	0.00367331	0.00609262	0.0012832
286.6	0.00328768	0.00579241	0.00068321
286.8	0.00356398	0.00567377	0.00050206
287	0.0032318	0.00555272	0.00034838
287.2	0.00297118	0.00522855	-0.00010903
287.4	0.00315688	0.00531796	-7.833e-05
287.6	0.00244448	0.00492919	5.66e-06
287.8	0.00275776	0.00525238	0.00039973
288	0.00256159	0.00495137	0.00022588
288.2	0.00257227	0.00507591	0.00047235
288.4	0.00189844	0.00515767	0.00084426
288.6	0.00244368	0.00551443	0.00086925
288.8	0.0028518	0.00565014	0.00139463
289	0.0030992	0.00577012	0.00172581
289.2	0.00349486	0.00521035	0.00211757
289.4	0.00383946	0.00561941	0.00244283
289.6	0.00383658	0.00608135	0.00278303
289.8	0.0042781	0.00603287	0.00270675
290	0.00468459	0.00594982	0.00296084
290.2	0.0046813	0.00541443	0.00221093
290.4	0.00458404	0.0048099	0.00204167
290.6	0.00500035	0.00526461	0.00253224
290.8	0.00497854	0.00510067	0.0025999
291	0.00452475	0.00548006	0.00268972
291.2	0.00423268	0.0055198	0.00253289
291.4	0.00426134	0.00527209	0.00226308
291.6	0.00383992	0.00526534	0.00193285
291.8	0.00412533	0.00553516	0.0020321
292	0.00386342	0.00546444	0.0020182
292.2	0.00402203	0.0050476	0.00214473
292.4	0.0040616	0.00528298	0.00239172
292.6	0.00509974	0.0058142	0.00287325
292.8	0.00547701	0.00612725	0.00324632
293	0.00542186	0.00593609	0.00311595
293.2	0.00554203	0.00549031	0.00324708
293.4	0.00594432	0.00527141	0.00362007
293.6	0.00648363	0.00580378	0.00396352
293.8	0.00638486	0.00540131	0.00352998
294	0.00672836	0.00572449	0.00338602
294.2	0.00676128	0.00595634	0.00336753
294.4	0.00700624	0.00642028	0.00406366
294.6	0.00643801	0.00615074	0.00387883
294.8	0.00572994	0.00569234	0.00322577
295	0.00568869	0.0066247	0.00322727
295.2	0.00518281	0.00647476	0.00260832
295.4	0.00484394	0.00604043	0.00177319
295.6	0.00464778	0.0060535	0.00159045
295.8	0.00422809	0.00594086	0.00128125
296	0.00438146	0.00609151	0.00129749
296.2	0.00449835	0.00604481	0.00165474
296.4	0.004583	0.00656249	0.00172742
296.6	0.00485865	0.00697319	0.00198298
296.8	0.00480451	0.00684781	0.00201571
297	0.00447413	0.00646083	0.00222883
297.2	0.0045388	0.0062906	0.00253158
297.4	0.00494941	0.00638174	0.00309651
297.6	0.00507549	0.00663824	0.00336546
297.8	0.00518475	0.00625723	0.00297954
298	0.0055428	0.00656944	0.00320099
298.2	0.00560871	0.00675281	0.00390072
298.4	0.00552819	0.00648788	0.00354562
298.6	0.00516422	0.00560225	0.00290499
298.8	0.00487407	0.00557859	0.00269691
299	0.00490696	0.00598513	0.00237735
299.2	0.0045411	0.00551518	0.00177985
299.4	0.0047618	0.00519423	0.00161067
299.6	0.00509749	0.00502734	0.0014382
299.8	0.00452086	0.00515344	0.00147689
300	0.00479122	0.00521689	0.00131999
300.2	0.00463314	0.00523373	0.00110517
300.4	0.00457089	0.00466445	0.00084445
300.6	0.00451237	0.00455315	0.00076594
300.8	0.00379661	0.0036907	0.00089682
301	0.00269583	0.00331364	0.00056568
301.2	0.0029031	0.00348964	0.00075003
301.4	0.00309627	0.00327799	0.00077229
301.6	0.00321457	0.00341656	0.00130626
301.8	0.00380801	0.00362304	0.00139811
302	0.00395895	0.0036657	0.00147538
302.2	0.00428504	0.00405541	0.00161947
302.4	0.00434121	0.00406969	0.00126329
302.6	0.00422743	0.0041844	0.00107205
302.8	0.00457047	0.00498792	0.00085392
303	0.00504702	0.00531336	0.0008354
303.2	0.00506677	0.00544669	0.00102975
303.4	0.00553022	0.0056823	0.00160878
303.6	0.00561431	0.00595344	0.00196119
303.8	0.00530212	0.00594123	0.00183993
304	0.00610311	0.00590547	0.00159263
304.2	0.00600587	0.00568522	0.00152618
304.4	0.00580385	0.00485836	0.00165938
304.6	0.00572963	0.00445204	0.00169955
304.8	0.0053104	0.00391307	0.00212974
305	0.00549904	0.00419006	0.00238861
305.2	0.00633509	0.00496094	0.00335435
305.4	0.00668958	0.00474534	0.00380911
305.6	0.00687428	0.00530289	0.00421417
305.8	0.00690538	0.00549589	0.00419207
306	0.00701913	0.0058596	0.00416697
306.2	0.00677169	0.00595225	0.00417204
306.4	0.00640274	0.00610878	0.00399104
306.6	0.0059726	0.0057361	0.00342981
306.8	0.00598852	0.00567557	0.00329321
307	0.00541396	0.00516551	0.00334515
307.2	0.00524255	0.00500532	0.0032448
307.4	0.00554965	0.00466917	0.00365317
307.6	0.00540485	0.00453214	0.00328902
307.8	0.00508834	0.00354792	0.00258291
308	0.00511961	0.00325661	0.00263658
308.2	0.00469657	0.00252286	0.00198542
308.4	0.00511332	0.00201895	0.00252637
308.6	0.00538041	0.00195283	0.00261211
308.8	0.00554418	0.00237629	0.00296813
309	0.00557238	0.00278396	0.00289596
309.2	0.00575976	0.00379197	0.00340068
309.4	0.00561808	0.00409227	0.00316785
309.6	0.00524681	0.00505224	0.00318509
309.8	0.00494254	0.00556256	0.00302257
310	0.00508364	0.00581824	0.0028382
310.2	0.00513698	0.00623667	0.00263375
310.4	0.00514108	0.00663685	0.00229221
310.6	0.00475817	0.0063285	0.00156041
310.8	0.00454251	0.00637621	0.00115221
311	0.00478075	0.00672939	0.00149731
311.2	0.00502489	0.00645896	0.0013002
311.4	0.00569422	0.00633582	0.0021661
311.6	0.00533842	0.00608925	0.00183772
311.8	0.00505486	0.00534868	0.00148003
312	0.00485904	0.00518366	0.00151616
312.2	0.00508527	0.00486941	0.00114582
312.4	0.00558468	0.00460476	0.00159852
312.6	0.005117	0.00471816	0.00126906
312.8	0.00503282	0.00472053	0.00119576
313	0.00462487	0.00470305	0.00134306
313.2	0.00468384	0.00518001	0.001813
313.4	0.00468587	0.00503977	0.00176168
313.6	0.00463675	0.00510827	0.00245056
313.8	0.00438675	0.00522736	0.00236367
314	0.00441928	0.00512139	0.00246199
314.2	0.00458674	0.00488834	0.00247703
314.4	0.00415773	0.00435139	0.00251917
314.6	0.00371257	0.00409668	0.0022624
314.8	0.0038863	0.00382283	0.00220578
315	0.00470459	0.00414024	0.0030032
315.2	0.00489874	0.00392632	0.0028621
315.4	0.00486678	0.00395042	0.00320108
315.6	0.00423814	0.00400388	0.00263972
315.8	0.00400518	0.00396047	0.00220021
316	0.00320593	0.00316597	0.00127138
316.2	0.00358376	0.00303046	0.00098225
316.4	0.00398757	0.00320073	0.00129854
316.6	0.00353833	0.00305744	0.00079959
316.8	0.00365567	0.0034855	0.00066565
317	0.00426579	0.00409464	0.00089868
317.2	0.00466102	0.00403834	0.00066354
317.4	0.00475749	0.00360406	0.00076922
317.6	0.00507961	0.00355112	0.00092951
317.8	0.00569742	0.00379207	0.00105891
318	0.0063336	0.00374804	0.00150314
318.2	0.00671069	0.00371549	0.00161608
318.4	0.00682239	0.00430189	0.00213158
318.6	0.00698027	0.00489633	0.00236514
318.8	0.00721582	0.00476122	0.00242295
319	0.00706425	0.00515124	0.00244205
319.2	0.00659228	0.00514018	0.00268838
319.4	0.00577613	0.00474641	0.00243113
319.6	0.00561553	0.00465578	0.0028913
319.8	0.00479683	0.00403626	0.00231106
320	0.0043057	0.00332219	0.00234315
320.2	0.00421894	0.00303712	0.00255048
320.4	0.00345927	0.00317855	0.00221184
320.6	0.0031083	0.00309555	0.00208279
320.8	0.00297355	0.00319547	0.00178056
321	0.00343513	0.00307464	0.00185068
321.2	0.00262598	0.00268073	0.00094792
321.4	0.00242989	0.00252156	0.00102728
321.6	0.00361149	0.00289667	0.00156179
321.8	0.00389174	0.0032403	0.00145558
322	0.00415758	0.00364579	0.00156199
322.2	0.00395983	0.00375916	0.00157702
322.4	0.00427916	0.00451233	0.00191205
322.6	0.00390452	0.00453669	0.00188472
322.8	0.00424864	0.00434126	0.00173811
323	0.00435179	0.00465881	0.00187658
323.2	0.00447488	0.00431543	0.00207866
323.4	0.00444092	0.00425009	0.00214703
323.6	0.00467365	0.00410245	0.00267345
323.8	0.00455963	0.00384441	0.00288003
324	0.00459555	0.00364451	0.00329848
324.2	0.00434829	0.00359848	0.0029334
324.4	0.0044302	0.00374612	0.00357428
324.6	0.00472541	0.00371957	0.00393187
324.8	0.00380789	0.00324406	0.00320685
325	0.00408208	0.00350176	0.00385626
325.2	0.00395289	0.00368376	0.00323906
325.4	0.00435962	0.00385851	0.00316963
325.6	0.00484614	0.00334626	0.00322839
325.8	0.0045267	0.00340367	0.00271655
326	0.00483541	0.00341135	0.00268868
326.2	0.00459026	0.00292458	0.00231713
326.4	0.00481646	0.00332705	0.00196331
326.6	0.00432712	0.00292278	0.0015573
326.8	0.00469273	0.00304308	0.00171649
327	0.00482274	0.00302818	0.00167873
327.2	0.00456164	0.00306447	0.001527
327.4	0.00547631	0.00387587	0.0021699
327.6	0.00608225	0.00368153	0.0022537
327.8	0.00629754	0.00358958	0.00229802
328	0.00638016	0.00359409	0.00234285
328.2	0.00629785	0.00370463	0.00249887
328.4	0.00648146	0.00363351	0.0029754
328.6	0.00630599	0.0036477	0.00294948
328.8	0.00671082	0.00387187	0.00341731
329	0.00763506	0.00417266	0.0038103
329.2	0.0079101	0.00432565	0.003828
329.4	0.00763896	0.00397638	0.00365332
329.6	0.00754986	0.00288621	0.00387914
329.8	0.00734422	0.00310778	0.00386298
330	0.00682182	0.00210821	0.00320037
330.2	0.00638981	0.00191822	0.0030351
330.4	0.00609678	0.00195136	0.00290259
330.6	0.00518668	0.00152446	0.00236698
330.8	0.00476278	0.0018139	0.00265004
331	0.00439255	0.00182098	0.00251031
331.2	0.00415522	0.00231493	0.00258367
331.4	0.00405474	0.0025182	0.00243047
331.6	0.00367493	0.00255581	0.00238241
331.8	0.00319863	0.00287013	0.00212057
332	0.00277628	0.00315463	0.00210543
332.2	0.00304375	0.00386385	0.00250404
332.4	0.00337852	0.00432995	0.00253292
332.6	0.00424108	0.00475764	0.00282098
332.8	0.00501716	0.00531713	0.0028945
333	0.00502309	0.00527871	0.00254443
333.2	0.00460845	0.00507677	0.00250885
333.4	0.00471158	0.0047692	0.00202813
333.6	0.00507601	0.00420314	0.00222285
333.8	0.00524012	0.00371043	0.00247345
334	0.00495331	0.00297169	0.00206717
334.2	0.00533748	0.00305243	0.00227395
334.4	0.00562807	0.00250236	0.00208774
334.6	0.0048454	0.00174435	0.00112679
334.8	0.00453602	0.00163306	0.00134061
335	0.00463211	0.00120506	0.00136078
335.2	0.00459402	0.00148008	0.00188682
335.4	0.00420703	0.00160412	0.00210646
335.6	0.00483688	0.00225548	0.00282379
335.8	0.00469723	0.00219061	0.0028045
336	0.00454509	0.00216467	0.00290609
336.2	0.00496176	0.00235764	0.00297872
336.4	0.00511991	0.00246209	0.00312903
336.6	0.00512666	0.00259515	0.00301336
336.8	0.00464382	0.00258785	0.00270176
337	0.00439896	0.0025975	0.0027091
337.2	0.00459649	0.00255312	0.00260706
337.4	0.00507149	0.00247017	0.00302827
337.6	0.00503544	0.00216694	0.00308016
337.8	0.00500867	0.00183631	0.00286176
338	0.00467475	0.00212541	0.00255008
338.2	0.00552873	0.00225108	0.00239737
338.4	0.0059993	0.00229864	0.0016049
338.6	0.00613799	0.00243709	0.00117754
338.8	0.00634592	0.00276892	0.00147116
339	0.00680606	0.00264517	0.00154454
339.2	0.00680541	0.00322316	0.00211021
339.4	0.00689395	0.00336052	0.00225859
339.6	0.00681552	0.00310626	0.00211633
339.8	0.00618629	0.00282375	0.00189393
340	0.00606764	0.00283661	0.00220683
340.2	0.00575748	0.0030519	0.00199936
340.4	0.00586397	0.0030867	0.00267054
340.6	0.0054092	0.00290358	0.00213148
340.8	0.00531861	0.00268473	0.00216697
341	0.00545743	0.00289438	0.00250997
341.2	0.0050748	0.00272654	0.00249149
341.4	0.00475742	0.00290015	0.00297228
341.6	0.00473389	0.0028106	0.00289003
341.8	0.0047595	0.00292498	0.00286248
342	0.00519745	0.00405846	0.0033474
342.2	0.00515846	0.00405771	0.00302589
342.4	0.00485364	0.00411864	0.00254655
342.6	0.00489692	0.00408473	0.00287705
342.8	0.00394021	0.00323325	0.00256128
343	0.00427462	0.00317987	0.00247253
343.2	0.00401792	0.00312995	0.00276208
343.4	0.0038661	0.00245358	0.00275505
343.6	0.0035814	0.00233357	0.0023566
343.8	0.00378237	0.00242413	0.00266311
344	0.0040689	0.00261735	0.00268733
344.2	0.00425587	0.0029017	0.00285908
344.4	0.00485669	0.00249849	0.00265592
344.6	0.00423581	0.00236462	0.00191038
344.8	0.0042444	0.00228652	0.00201589
345	0.00457727	0.00274295	0.00225686
345.2	0.00483803	0.00270174	0.00222506
345.4	0.00535836	0.00287003	0.00244833
345.6	0.00574272	0.00322834	0.00229203
345.8	0.00611836	0.00402366	0.00259426
346	0.00613724	0.00433934	0.00240923
346.2	0.00548118	0.00358199	0.0016002
346.4	0.00560238	0.00385622	0.00150026
346.6	0.00583828	0.00366995	0.00143793
346.8	0.00577458	0.0030593	0.00144347
347	0.00584072	0.00288132	0.0008777
347.2	0.00557989	0.00290523	0.0014464
347.4	0.00507082	0.00246723	0.00106512
347.6	0.00490206	0.00271611	0.00103907
347.8	0.00504048	0.00255674	0.00153525
348	0.0048815	0.00265445	0.00140208
348.2	0.00429003	0.00232706	0.0014988
348.4	0.00394953	0.00212197	0.00076796
348.6	0.00362013	0.00201727	0.00088209
348.8	0.00438736	0.00231328	0.00115201
349	0.00439564	0.00212173	0.00057651
349.2	0.00422921	0.00210477	5.41e-05
349.4	0.00445187	0.00215489	0.00041301
349.6	0.00488821	0.0023167	0.00085456
349.8	0.00503801	0.00248844	0.00108182
350	0.00486445	0.00197745	0.00051194
350.2	0.00510382	0.00204097	0.00057765
350.4	0.0049476	0.00211151	0.00073593
350.6	0.00538523	0.00180544	0.0008588
350.8	0.00539469	0.00152923	0.00120966
351	0.00505535	0.00156103	0.00151219
351.2	0.00534848	0.00207485	0.00228404
351.4	0.0053662	0.00182542	0.0021387
351.6	0.00574466	0.00209139	0.0028369
351.8	0.00591406	0.00212969	0.00336782
352	0.00622312	0.00260355	0.00335094
352.2	0.00640591	0.00330735	0.00360104
352.4	0.00713016	0.00372245	0.00345322
352.6	0.00712431	0.00388913	0.00304788
352.8	0.00735066	0.00436316	0.00260308
353	0.00706974	0.00455002	0.00193812
353.2	0.00731219	0.00489256	0.00197212
353.4	0.00724669	0.00507111	0.00225001
353.6	0.00772722	0.00527644	0.00219414
353.8	0.00769743	0.00566715	0.00183191
354	0.00750611	0.0051634	0.0015128
354.2	0.00756692	0.00538267	0.00158269
354.4	0.00714748	0.00532505	0.00127429
354.6	0.00697159	0.00495657	0.00099839
354.8	0.00672598	0.0044266	0.00137738
355	0.00677289	0.00449414	0.00157527
355.2	0.00634072	0.0039583	0.00140672
355.4	0.00603185	0.00358677	0.00192215
355.6	0.00545	0.00323699	0.00213149
355.8	0.00557347	0.00345429	0.00241247
356	0.00553884	0.00394732	0.00281984
356.2	0.00545294	0.00409073	0.00268
356.4	0.00476078	0.0033557	0.00226903
356.6	0.00460109	0.00324805	0.00253055
356.8	0.00498125	0.00307058	0.00302724
357	0.00480017	0.00256479	0.00285473
357.2	0.00489864	0.00259046	0.00285539
357.4	0.00475092	0.00238593	0.00267872
357.6	0.00550423	0.00233373	0.00256632
357.8	0.00565764	0.00254786	0.00240886
358	0.006022	0.00246554	0.00254682
358.2	0.00616251	0.0027869	0.00249431
358.4	0.00641746	0.0028616	0.00260397
358.6	0.00646652	0.00268138	0.00275977
358.8	0.00665216	0.00232915	0.00292341
359	0.00676469	0.00307311	0.00288701
359.2	0.00661525	0.00251406	0.00295333
359.4	0.00642934	0.00269937	0.0031319
359.6	0.00575356	0.00273931	0.00226296
359.8	0.00563255	0.00309883	0.00239069
360	0.00576731	0.00385195	0.00296423
360.2	0.00600428	0.0039497	0.00306775
360.4	0.00554701	0.00393098	0.0033588
360.6	0.00613496	0.00398132	0.0034659
360.8	0.00607249	0.00372425	0.00309911
361	0.00598411	0.00404497	0.00274747
361.2	0.00620402	0.00497567	0.00275776
361.4	0.00562952	0.00455397	0.00260457
361.6	0.00573724	0.0049984	0.00208664
361.8	0.00542507	0.00481397	0.00181645
362	0.00486018	0.00448789	0.00166499
362.2	0.00488171	0.00434584	0.00155544
362.4	0.00555177	0.00457044	0.0017452
362.6	0.00544172	0.00416656	0.00112344
362.8	0.00518578	0.0038116	0.00080955
363	0.00529471	0.00361631	0.0003225
363.2	0.0050636	0.00247902	-3.286e-05
363.4	0.00419229	0.00244831	-0.0006441
363.6	0.00378006	0.00194277	-0.00129545
363.8	0.00376487	0.00179738	-0.00128733
364	0.00487758	0.00299015	-0.00038452
364.2	0.00461075	0.00264983	-0.00063093
364.4	0.00456701	0.00253168	-0.00070881
364.6	0.00447851	0.00228753	-0.00087388
364.8	0.00423421	0.00265749	-0.00060118
365	0.00432485	0.003479	-2.697e-05
365.2	0.00416388	0.00408587	0.00031434
365.4	0.00350436	0.00397138	0.00040678
365.6	0.00405654	0.00469284	0.00105767
365.8	0.00362431	0.00417675	0.00130397
366	0.00429469	0.00496614	0.00181936
366.2	0.00554898	0.00575124	0.00256642
366.4	0.00605602	0.00589735	0.00273124
366.6	0.00603799	0.00578565	0.00280036
366.8	0.00624852	0.00581264	0.00301134
367	0.0063197	0.00573479	0.00262946
367.2	0.00610409	0.00505541	0.00271223
367.4	0.00521191	0.00502098	0.00202358
367.6	0.00551711	0.00469279	0.00167418
367.8	0.00554661	0.00501904	0.00180679
368	0.00597041	0.00521943	0.00203453
368.2	0.00501513	0.00415204	0.00100641
368.4	0.00477569	0.00378068	0.00104564
368.6	0.00398718	0.0036585	0.00088078
368.8	0.00389184	0.0040644	0.0009656
369	0.00391551	0.00421399	0.00113408
369.2	0.00448767	0.00455112	0.00144018
369.4	0.004601	0.00475184	0.00175388
369.6	0.00506369	0.00511893	0.00232365
369.8	0.00533592	0.00455477	0.00226658
370	0.00621022	0.00526441	0.00247941
370.2	0.00621056	0.00467506	0.00227108
370.4	0.00598756	0.00451359	0.00225835
370.6	0.00581611	0.00473663	0.00280202
370.8	0.00599154	0.00490293	0.00301512
371	0.00529131	0.00477998	0.00313121
371.2	0.00456596	0.0038948	0.0030321
371.4	0.00404072	0.00405795	0.00263459
371.6	0.00438103	0.00385178	0.00243591
371.8	0.00364276	0.00346752	0.00230164
372	0.00347782	0.00284872	0.00184228
372.2	0.00361818	0.00291095	0.00163817
372.4	0.0040669	0.00290457	0.00193696
372.6	0.00390742	0.0030762	0.00199526
372.8	0.00408543	0.00325253	0.00166346
373	0.00467561	0.0032103	0.001645
373.2	0.00545177	0.00331562	0.00174614
373.4	0.00528962	0.0034946	0.00160145
373.6	0.00570916	0.00347652	0.0017385
373.8	0.00643091	0.00349114	0.00202606
374	0.00668755	0.00398562	0.00202414
374.2	0.00636911	0.00391997	0.00177044
374.4	0.00650809	0.00458125	0.00265486
374.6	0.00645982	0.0049883	0.00281222
374.8	0.0067113	0.00591371	0.00342004
375	0.00613444	0.00590312	0.00345946
375.2	0.00624518	0.00610559	0.00358599
375.4	0.00617337	0.00602535	0.00374353
375.6	0.00593145	0.00568076	0.00354747
375.8	0.00542329	0.00551915	0.00385933
376	0.00551184	0.00567425	0.00413597
376.2	0.00614516	0.0060044	0.00447953
376.4	0.00640955	0.00559576	0.00434791
376.6	0.0063727	0.00567584	0.00464544
376.8	0.00625973	0.00522447	0.00396579
377	0.00685857	0.00519013	0.00412311
377.2	0.0069053	0.00513331	0.00395679
377.4	0.00703059	0.00542893	0.00360671
377.6	0.00739492	0.00518625	0.00335607
377.8	0.00789867	0.00540407	0.00357407
378	0.00792918	0.00523519	0.00346842
378.2	0.00755783	0.00526165	0.00269293
378.4	0.00781258	0.00535926	0.00289571
378.6	0.00798131	0.00619803	0.00284519
378.8	0.00807639	0.00622614	0.00303841
379	0.00797857	0.00614903	0.00294843
379.2	0.00797549	0.00645163	0.00279424
379.4	0.0077043	0.00600804	0.00288904
379.6	0.00719745	0.00582344	0.00246899
379.8	0.00661502	0.00572677	0.00265547
380	0.00609193	0.00531425	0.00260725
380.2	0.00645313	0.00520969	0.00260127
380.4	0.00586325	0.00474915	0.00253134
380.6	0.00515718	0.00482978	0.00274227
380.8	0.00467702	0.00415141	0.00226384
381	0.00471306	0.00438596	0.00246879
381.2	0.00433552	0.00378493	0.00194282
381.4	0.00473358	0.00398152	0.00182711
381.6	0.00454394	0.00388515	0.00208032
381.8	0.00453126	0.00396567	0.00241596
382	0.00379557	0.00359224	0.002031
382.2	0.0035137	0.0037394	0.00150245
382.4	0.00385467	0.00340886	0.00165616
382.6	0.00429796	0.00361434	0.00214515
382.8	0.00458453	0.00333671	0.00204912
383	0.00510629	0.00357639	0.00216552
383.2	0.00581972	0.00390839	0.00217143
383.4	0.00653199	0.00426343	0.00290766
383.6	0.00634504	0.00449157	0.00243317
383.8	0.00670485	0.00470102	0.00275256
384	0.00678143	0.00464775	0.00273233
384.2	0.00701752	0.00497354	0.00267428
384.4	0.00680316	0.00504592	0.0032742
384.6	0.00701006	0.00568042	0.0035183
384.8	0.00715791	0.00508235	0.00335662
385	0.00728964	0.00566336	0.00353157
385.2	0.00721256	0.0057065	0.0036202
385.4	0.00738805	0.00639344	0.00408313
385.6	0.00662222	0.00633842	0.00445812
385.8	0.00614188	0.00638703	0.00437659
386	0.00586046	0.00637853	0.00438142
386.2	0.00573502	0.00634686	0.00440613
386.4	0.00572358	0.0062383	0.00472825
386.6	0.00568237	0.00595502	0.00486183
386.8	0.0055087	0.00590502	0.0048887
387	0.00512697	0.00539448	0.00450269
387.2	0.00503611	0.00548212	0.0045862
387.4	0.00465851	0.00535136	0.0042436
387.6	0.00456277	0.00545785	0.00351362
387.8	0.00473879	0.00524917	0.00341032
388	0.00450664	0.00539026	0.00307418
388.2	0.00481138	0.00550157	0.00301142
388.4	0.00557079	0.00636079	0.00336982
388.6	0.00567151	0.00634967	0.00247612
388.8	0.00521349	0.00519792	0.00177512
389	0.00552722	0.00572411	0.00189055
389.2	0.00558677	0.00547117	0.00174896
389.4	0.00613463	0.00541674	0.00173605
389.6	0.00640444	0.00581807	0.00197945
389.8	0.00653874	0.00618652	0.00220981
390	0.00704113	0.00602945	0.00259031
390.2	0.00663769	0.00583002	0.00253857
390.4	0.00706281	0.00582236	0.00260466
390.6	0.00665225	0.00555651	0.00238394
390.8	0.0067036	0.00532922	0.00233726
391	0.00620584	0.00478356	0.00173651
391.2	0.00582593	0.00467102	0.00171259
391.4	0.00581643	0.0047424	0.00170286
391.6	0.00569858	0.00483257	0.00192685
391.8	0.00494578	0.00450494	0.00164267
392	0.00498161	0.00496077	0.0018726
392.2	0.0055511	0.00565186	0.0025241
392.4	0.00543362	0.00616426	0.00274746
392.6	0.00509267	0.0052235	0.00236835
392.8	0.00552764	0.00531021	0.00306089
393	0.00625276	0.00585615	0.00327857
393.2	0.00618212	0.00557813	0.00297074
393.4	0.00672266	0.00621804	0.00349671
393.6	0.00684052	0.00653967	0.00420194
393.8	0.00724432	0.00661919	0.00481481
394	0.00772096	0.006961	0.00462685
394.2	0.00755761	0.00726752	0.0042951
394.4	0.00816094	0.00796461	0.00428936
394.6	0.00770835	0.00794591	0.00403324
394.8	0.00806449	0.00755345	0.00371663
395	0.00750723	0.00703671	0.00342132
395.2	0.00714805	0.00696816	0.00359949
395.4	0.00686927	0.00658483	0.00315154
395.6	0.00618625	0.00602768	0.00281626
395.8	0.00587004	0.00599025	0.00218126
396	0.00657441	0.00674126	0.00275976
396.2	0.00657579	0.00687943	0.00267546
396.4	0.00615121	0.00603073	0.00172712
396.6	0.00666607	0.00599756	0.0019112
396.8	0.00684278	0.00596655	0.00171178
397	0.00600468	0.00492417	0.00074651
397.2	0.00527432	0.00449807	0.00012989
397.4	0.00510672	0.00429361	8.07e-05
397.6	0.00491567	0.00420917	0.00021935
397.8	0.00493307	0.00454918	5.248e-05
398	0.0047624	0.00460052	-0.00017793
398.2	0.00478646	0.00449542	0.00015324
398.4	0.00537023	0.00444737	0.00028666
398.6	0.0052052	0.00446467	0.00069305
398.8	0.0055171	0.00439328	0.00078905
399	0.00509183	0.00419111	0.00110598
399.2	0.0046935	0.00410037	0.00118162
399.4	0.00501951	0.00455976	0.00184785
399.6	0.00499741	0.00425426	0.00205227
399.8	0.00555708	0.00444929	0.00243847
400	0.00657243	0.00510307	0.00305739
400.2	0.00724672	0.00480944	0.00302311
400.4	0.00768115	0.00494786	0.00358936
400.6	0.00815529	0.00532847	0.00419583
400.8	0.00814669	0.00529106	0.00387245
401	0.00757008	0.00457644	0.00397075
401.2	0.00727755	0.00441186	0.00384941
401.4	0.00723245	0.0042399	0.00415765
401.6	0.00741281	0.00468449	0.00452332
401.8	0.0072808	0.00437554	0.00448384
402	0.0074473	0.00475152	0.00466899
402.2	0.00785437	0.00504222	0.00476012
402.4	0.00757953	0.00532625	0.0041672
402.6	0.00734996	0.00605781	0.00413128
402.8	0.00681322	0.00556879	0.00342727
403	0.00596644	0.00533794	0.00276512
403.2	0.00538962	0.0049338	0.00232418
403.4	0.00565765	0.00542966	0.0030846
403.6	0.00553538	0.00483156	0.00240595
403.8	0.00603597	0.00509969	0.00264087
404	0.00647376	0.00533045	0.00222605
404.2	0.00694937	0.00488112	0.00176158
404.4	0.00658019	0.00474143	0.00135738
404.6	0.00679352	0.00438702	0.00114103
404.8	0.00646652	0.00388886	0.00114253
405	0.00597491	0.00270039	0.00105953
405.2	0.00600371	0.00226658	0.00104497
405.4	0.00621771	0.00245422	0.00153024
405.6	0.00680244	0.0026542	0.00167943
405.8	0.00711728	0.00272416	0.00199923
406	0.00742059	0.00335275	0.00296642
406.2	0.00800358	0.0037965	0.00320912
406.4	0.00818643	0.00426186	0.00323376
406.6	0.00856321	0.00481176	0.00338501
406.8	0.00849545	0.0049504	0.00340427
407	0.00854979	0.00573664	0.00355333
407.2	0.00881601	0.0062017	0.00436432
407.4	0.00918733	0.00655228	0.0048468
407.6	0.00893895	0.00648821	0.00399988
407.8	0.00869376	0.00653516	0.003912
408	0.00884251	0.00633145	0.00359183
408.2	0.0087354	0.00630276	0.00347093
408.4	0.00847528	0.00590123	0.00331628
408.6	0.00842496	0.00567142	0.00351836
408.8	0.00751287	0.00473147	0.00300211
409	0.00745997	0.00448136	0.00287159
409.2	0.00745643	0.00433599	0.00264626
409.4	0.00720623	0.00420679	0.00256207
409.6	0.00709026	0.00367137	0.00275248
409.8	0.00719603	0.00384295	0.00319244
410	0.00703623	0.00371347	0.00351799
410.2	0.00789437	0.00430415	0.00353358
410.4	0.00810106	0.00431403	0.00360677
410.6	0.00809862	0.00474842	0.00377643
410.8	0.00857483	0.00540366	0.00419022
411	0.00851051	0.00538838	0.00421035
411.2	0.00864753	0.00533901	0.00423478
411.4	0.00841568	0.00477782	0.00332248
411.6	0.00847428	0.00521617	0.00321262
411.8	0.00875688	0.00531151	0.00383994
412	0.0090297	0.00514698	0.00368552
412.2	0.00905271	0.00523402	0.00365643
412.4	0.00925093	0.00481261	0.0033519
412.6	0.00911776	0.00489737	0.00357058
412.8	0.00888807	0.00435204	0.00276484
413	0.00928282	0.00440037	0.00271882
413.2	0.00851075	0.0043874	0.00220389
413.4	0.00798829	0.00368605	0.00234669
413.6	0.00744301	0.00347493	0.00200116
413.8	0.00780842	0.00362436	0.00223644
414	0.00770301	0.0034733	0.00238203
414.2	0.0081791	0.00351579	0.00280434
414.4	0.00777912	0.00386912	0.00291491
414.6	0.00791313	0.004056	0.00307799
414.8	0.0078404	0.00385906	0.00290136
415	0.00778787	0.00365459	0.00281275
415.2	0.00775478	0.00346506	0.00282306
415.4	0.00803493	0.00320264	0.00239201
415.6	0.00802374	0.00357963	0.00276103
415.8	0.00821789	0.00382764	0.00321278
416	0.0083817	0.0040318	0.003389
416.2	0.00835579	0.00465555	0.00374825
416.4	0.00834766	0.00486324	0.00367076
416.6	0.00852257	0.00523835	0.00398515
416.8	0.00835735	0.00546671	0.00376416
417	0.0086453	0.00610624	0.00440596
417.2	0.00790058	0.00661705	0.00432751
417.4	0.00752095	0.00645523	0.00422353
417.6	0.00669617	0.00663897	0.00379985
417.8	0.00718419	0.0071189	0.00496616
418	0.00672628	0.00733829	0.00493963
418.2	0.00675378	0.00744979	0.00466651
418.4	0.00696349	0.00785402	0.0046982
418.6	0.00688549	0.00699274	0.0040399
418.8	0.00672073	0.00618964	0.00349465
419	0.00718864	0.00601891	0.00384964
419.2	0.00749996	0.00505313	0.00361892
419.4	0.00754444	0.00448479	0.00335456
419.6	0.00787221	0.00433775	0.00371936
419.8	0.00805901	0.00422842	0.00407779
420	0.00766174	0.00323825	0.00367315
420.2	0.00748313	0.00260136	0.00308495
420.4	0.00749686	0.00186359	0.00279475
420.6	0.00736578	0.00113486	0.00235014
420.8	0.00723805	0.00109785	0.00213983
421	0.00711557	0.00130195	0.00180632
421.2	0.00652311	0.00128985	0.00135182
421.4	0.00583028	0.00070294	0.00108533
421.6	0.00565923	0.00104335	0.00144546
421.8	0.0059243	0.00162906	0.00195833
422	0.00501897	0.00181826	0.00130517
422.2	0.005053	0.00225285	0.00153797
422.4	0.00518669	0.0022079	0.00215159
422.6	0.00496602	0.00233328	0.00215742
422.8	0.00530942	0.00289676	0.00271564
423	0.00499879	0.00265211	0.00318464
423.2	0.00569322	0.00273817	0.00327371
423.4	0.00598761	0.00325892	0.00365219
423.6	0.00668065	0.00390859	0.00378265
423.8	0.00693165	0.00383793	0.00323419
424	0.00699833	0.00364018	0.00280605
424.2	0.00763728	0.00410897	0.00285868
424.4	0.00753249	0.0041292	0.0026282
424.6	0.00752194	0.00382815	0.00192989
424.8	0.00785119	0.00438901	0.00241023
425	0.00781657	0.00448396	0.00232284
425.2	0.00805279	0.00501192	0.0022798
425.4	0.00774298	0.00468075	0.00225881
425.6	0.00832817	0.00518519	0.00245495
425.8	0.00808555	0.00459522	0.00168884
426	0.00749347	0.00455621	0.00170738
426.2	0.00745363	0.00436419	0.00232802
426.4	0.00753723	0.00396368	0.00290663
426.6	0.00708703	0.00401264	0.00260256
426.8	0.00627233	0.00370028	0.00249879
427	0.00572617	0.00291149	0.00205035
427.2	0.00668961	0.00362544	0.00217816
427.4	0.00683687	0.00395187	0.00268254
427.6	0.00659548	0.00436297	0.00247026
427.8	0.0069775	0.00457118	0.00247332
428	0.00644443	0.00473178	0.00252062
428.2	0.00652132	0.00475697	0.0030192
428.4	0.00562394	0.00416023	0.00256793
428.6	0.00556622	0.00388952	0.00259143
428.8	0.00580661	0.00419299	0.00322742
429	0.00596986	0.00416021	0.0023932
429.2	0.00605848	0.00435986	0.00208997
429.4	0.00604936	0.00370377	0.00193895
429.6	0.00636953	0.00345307	0.00177992
429.8	0.00564958	0.00333021	0.00145104
430	0.00511578	0.00282447	0.00146875
430.2	0.00507209	0.00246223	0.00155232
430.4	0.00496694	0.00202017	0.00157855
430.6	0.00494644	0.00234333	0.00117887
430.8	0.0046955	0.00233447	0.00150453
431	0.0049387	0.00199188	0.00167955
431.2	0.00553257	0.00189696	0.00194506
431.4	0.00577773	0.00280594	0.00257556
431.6	0.00578119	0.00347886	0.00257323
431.8	0.00668777	0.00372161	0.00281092
432	0.00654018	0.00360695	0.00289231
432.2	0.00665479	0.00396717	0.00296972
432.4	0.00673714	0.00435874	0.0029155
432.6	0.0069527	0.00500655	0.00278724
432.8	0.00702412	0.00539205	0.00312462
433	0.0067939	0.00534935	0.00273118
433.2	0.00662663	0.00568812	0.00299094
433.4	0.00675835	0.00580796	0.00334149
433.6	0.00641011	0.00571045	0.00325995
433.8	0.00578965	0.00585777	0.00274022
434	0.00560606	0.00500074	0.00224004
434.2	0.00602956	0.00520785	0.00234564
434.4	0.00574982	0.0047212	0.0023229
434.6	0.00586176	0.00428857	0.00220884
434.8	0.00566752	0.00348144	0.00216624
435	0.00578858	0.00273316	0.00184013
435.2	0.00611448	0.00261517	0.00156555
435.4	0.00613391	0.00326454	0.00147617
435.6	0.00643503	0.00313797	0.00123275
435.8	0.00685455	0.0032454	0.00113949
436	0.00658996	0.00278356	0.00088601
436.2	0.00676438	0.00311967	0.00104592
436.4	0.00694608	0.00333304	0.00160897
436.6	0.00676957	0.00357984	0.00175904
436.8	0.00706011	0.00356051	0.00257201
437	0.00767854	0.00391907	0.00312476
437.2	0.00819935	0.00421093	0.00354324
437.4	0.00870007	0.00434867	0.00425017
437.6	0.00856682	0.0046571	0.00430254
437.8	0.00852981	0.00465796	0.00437369
438	0.00832585	0.00448375	0.00429658
438.2	0.00796953	0.00407979	0.00409323
438.4	0.00772819	0.00399968	0.00438363
438.6	0.0075918	0.00391101	0.00418365
438.8	0.00747026	0.00418378	0.00438517
439	0.00689099	0.00406095	0.00413455
439.2	0.00642554	0.00421515	0.00368165
439.4	0.00633343	0.00455979	0.00400875
439.6	0.00593598	0.00452403	0.00378572
439.8	0.00604354	0.00485528	0.00366511
440	0.00586715	0.0049052	0.00333035
440.2	0.0057501	0.00544922	0.00320018
440.4	0.00563912	0.00576357	0.00297503
440.6	0.00563592	0.00564445	0.00277217
440.8	0.00572783	0.00586261	0.00270221
441	0.00616274	0.00585135	0.0027127
441.2	0.00601386	0.00572661	0.00233559
441.4	0.00664062	0.00607642	0.00291816
441.6	0.00643863	0.00606969	0.00247004
441.8	0.00650662	0.00572234	0.00193139
442	0.00643651	0.00570182	0.00123207
442.2	0.00691065	0.00567668	0.00130989
442.4	0.00750367	0.006174	0.00210494
442.6	0.00732787	0.00619834	0.0021548
442.8	0.00763226	0.0063603	0.00226454
443	0.00740432	0.0058898	0.00221805
443.2	0.00783577	0.00629314	0.00295957
443.4	0.00829543	0.00664168	0.00363694
443.6	0.00819915	0.00659676	0.00310613
443.8	0.00838672	0.0069649	0.00305794
444	0.00799302	0.00666292	0.00273141
444.2	0.00775213	0.00635416	0.00303792
444.4	0.00767626	0.0059694	0.00298993
444.6	0.00729556	0.00520487	0.00282599
444.8	0.0072118	0.00510129	0.00260424
445	0.00730081	0.00423732	0.00270876
445.2	0.0076819	0.00436143	0.00320503
445.4	0.00791009	0.00431019	0.00357157
445.6	0.00736217	0.00378328	0.00286188
445.8	0.00773735	0.00395024	0.0026015
446	0.0077646	0.00409128	0.00236876
446.2	0.00775709	0.00408547	0.0025333
446.4	0.00725415	0.00389044	0.00253376
446.6	0.00675712	0.00399723	0.0022979
446.8	0.00692967	0.00429787	0.00236967
447	0.00635465	0.00419342	0.00278078
447.2	0.00649978	0.0048195	0.00290172
447.4	0.00631869	0.0048754	0.00267078
447.6	0.00622956	0.00554736	0.00271684
447.8	0.00565576	0.00555629	0.00257256
448	0.00594673	0.00541609	0.00277896
448.2	0.00575964	0.00507454	0.00243803
448.4	0.00597023	0.00515624	0.00230162
448.6	0.00586677	0.00517704	0.00199864
448.8	0.00641063	0.00570984	0.00197617
449	0.00694208	0.00572661	0.00231886
449.2	0.00780298	0.00613166	0.0024589
449.4	0.00787107	0.00605291	0.00278854
449.6	0.00796984	0.00585502	0.00291098
449.8	0.00872234	0.0062768	0.00279679
450	0.00931848	0.00619859	0.00291456
450.2	0.00919338	0.00581443	0.00303298
450.4	0.00922044	0.00546264	0.00316857
450.6	0.00926637	0.00559137	0.00335354
450.8	0.00913495	0.00575634	0.00348886
451	0.00874597	0.00497285	0.00326177
451.2	0.00875542	0.00527493	0.00309398
451.4	0.00887918	0.00576718	0.00358794
451.6	0.00887413	0.00550698	0.00314171
451.8	0.00777526	0.0045847	0.0026257
452	0.00769436	0.00444924	0.00293636
452.2	0.00679167	0.00383157	0.00243265
452.4	0.0064449	0.00431358	0.00264887
452.6	0.00652426	0.00439516	0.00288685
452.8	0.00678665	0.00417472	0.00287932
453	0.00661225	0.00383928	0.0032716
453.2	0.00672238	0.00396084	0.00353191
453.4	0.00655588	0.00419812	0.00433334
453.6	0.00678604	0.00417104	0.00455435
453.8	0.00726557	0.00466731	0.00445183
454	0.00753763	0.00482795	0.00412987
454.2	0.00754919	0.00507988	0.004231
454.4	0.00783749	0.00573547	0.00407307
454.6	0.00794992	0.00669352	0.00412905
454.8	0.00783468	0.00714122	0.00420804
455	0.0083226	0.00745227	0.003891
455.2	0.00851363	0.0079729	0.00330358
455.4	0.00869556	0.00812485	0.00320921
455.6	0.00818982	0.00753529	0.00254125
455.8	0.00704921	0.007489	0.00253391
456	0.00743393	0.00808999	0.00291988
456.2	0.00706113	0.00742613	0.0025602
456.4	0.00731959	0.00773253	0.00273982
456.6	0.00743313	0.00720219	0.00317775
456.8	0.00757274	0.00691489	0.00304175
457	0.00757229	0.00695328	0.00326409
457.2	0.00775796	0.00700905	0.00379301
457.4	0.0081186	0.00676996	0.00432445
457.6	0.00801175	0.00606477	0.00373153
457.8	0.00783203	0.0055785	0.00319826
458	0.00784892	0.00484226	0.00255832
458.2	0.00768193	0.00476306	0.00273609
458.4	0.0075482	0.00490716	0.00248043
458.6	0.00723849	0.00477745	0.00227844
458.8	0.00737728	0.00451514	0.00231504
459	0.00749547	0.00455647	0.0018833
459.2	0.00768271	0.00427776	0.00182945
459.4	0.00730541	0.00451762	0.00185763
459.6	0.00736141	0.00460597	0.00217069
459.8	0.00706	0.00473704	0.00199068
460	0.00776839	0.00535303	0.00201699
460.2	0.00718806	0.0051081	0.00156333
460.4	0.00753681	0.00616243	0.00177247
460.6	0.00748993	0.00609088	0.00166798
460.8	0.00797437	0.00636538	0.00153772
461	0.00817855	0.00617407	0.00109203
461.2	0.00805417	0.0060392	0.00108225
461.4	0.00844773	0.00594089	0.00083566
461.6	0.00774685	0.0055439	-8.219e-05
461.8	0.00846921	0.00562812	0.00067561
462	0.00849029	0.00575387	0.00075122
462.2	0.00831981	0.005583	0.00057092
462.4	0.00861574	0.00596484	0.00094346
462.6	0.00865469	0.00599086	0.00096761
462.8	0.00970092	0.00587366	0.0017703
463	0.0094049	0.0057637	0.00187908
463.2	0.00971776	0.00518875	0.00210717
463.4	0.00908736	0.00468348	0.00207823
463.6	0.00903579	0.00440886	0.00240804
463.8	0.00838256	0.00397773	0.00212186
464	0.00814423	0.00361032	0.00190201
464.2	0.0075439	0.00356308	0.00167084
464.4	0.00769166	0.00408608	0.00170329
464.6	0.00728103	0.00310491	0.00088242
464.8	0.00739944	0.00322153	0.00053658
465	0.00715963	0.00356769	0.00070567
465.2	0.00716935	0.00413629	0.00107918
465.4	0.00735651	0.0047249	0.00128958
465.6	0.00733072	0.00525388	0.00152967
465.8	0.00778451	0.00596388	0.00239627
466	0.00737752	0.00590088	0.00214118
466.2	0.00763158	0.00610472	0.0023721
466.4	0.00807828	0.00640477	0.00287158
466.6	0.00835152	0.00646913	0.00325729
466.8	0.0087394	0.0063461	0.00374809
467	0.00825269	0.0060472	0.00336706
467.2	0.00903199	0.00622731	0.00356372
467.4	0.00932549	0.00675882	0.0043473
467.6	0.00950514	0.00662563	0.00429882
467.8	0.00937085	0.00602212	0.00408331
468	0.00928833	0.0055397	0.00364884
468.2	0.00934286	0.00607363	0.00366621
468.4	0.00908547	0.00639979	0.00359384
468.6	0.00902347	0.00610029	0.00328825
468.8	0.00872752	0.00648695	0.0034385
469	0.00844279	0.00671907	0.00380736
469.2	0.00838589	0.00632795	0.00347842
469.4	0.00804214	0.00645164	0.00301991
469.6	0.007872	0.00634765	0.00284646
469.8	0.00751877	0.00645999	0.00301142
470	0.00738569	0.00590648	0.00293032
470.2	0.00736893	0.00636312	0.00315306
470.4	0.00701541	0.00595251	0.0030981
470.6	0.00713238	0.00666674	0.00313885
470.8	0.00736213	0.00668599	0.00289135
471	0.00792339	0.00691159	0.00287155
471.2	0.00880497	0.00747222	0.00333325
471.4	0.00885466	0.00686854	0.00288755
471.6	0.00885036	0.00620572	0.00216212
471.8	0.00864659	0.00604004	0.00193997
472	0.00894831	0.00622839	0.00243796
472.2	0.00863956	0.00674126	0.00258552
472.4	0.00836755	0.00609534	0.00271209
472.6	0.00884653	0.00588784	0.00317631
472.8	0.00914062	0.0061258	0.00342214
473	0.00956916	0.00671183	0.00372605
473.2	0.00978659	0.0060663	0.00338015
473.4	0.00980697	0.00635357	0.00355886
473.6	0.00971706	0.00624364	0.0036391
473.8	0.00946854	0.00608693	0.00389536
474	0.00932184	0.00578874	0.00367777
474.2	0.00908787	0.00613589	0.003494
474.4	0.00852858	0.00562732	0.00365479
474.6	0.0084062	0.00581788	0.00312435
474.8	0.00799847	0.00566097	0.00281604
475	0.00792586	0.00560667	0.00287039
475.2	0.00811901	0.00524029	0.00236793
475.4	0.00808938	0.00489046	0.00203852
475.6	0.00869123	0.005476	0.00253475
475.8	0.00858451	0.00576307	0.00260412
476	0.00894874	0.00613649	0.00292247
476.2	0.00859334	0.00631475	0.00299424
476.4	0.00916965	0.00647077	0.00350505
476.6	0.00990553	0.00714506	0.00379946
476.8	0.00989531	0.00770365	0.00380579
477	0.00957327	0.00773162	0.00340834
477.2	0.00932097	0.00718192	0.00306941
477.4	0.00880579	0.00733076	0.00317095
477.6	0.00809727	0.00666336	0.00262671
477.8	0.0077473	0.00630869	0.00224615
478	0.00710302	0.00580333	0.00166609
478.2	0.0063299	0.00528515	0.0014707
478.4	0.00559118	0.00471148	0.00157305
478.6	0.00585007	0.00514443	0.00190022
478.8	0.00604262	0.0049982	0.00231047
479	0.00671786	0.00504013	0.00300992
479.2	0.00769592	0.00509168	0.00338687
479.4	0.00832706	0.00545011	0.00394722
479.6	0.00922979	0.00623254	0.00433751
479.8	0.00946736	0.00656029	0.00423211
480	0.0102142	0.00701874	0.00452305
480.2	0.0102149	0.00731736	0.00475795
480.4	0.0106127	0.00776444	0.00489648
480.6	0.0103705	0.00726527	0.00434577
480.8	0.0106475	0.00755552	0.00480178
481	0.0104993	0.00729745	0.0042864
481.2	0.00955752	0.00628995	0.00308192
481.4	0.00860626	0.00557154	0.00262126
481.6	0.00759053	0.00455474	0.00177459
481.8	0.0072524	0.00456769	0.0014916
482	0.00632491	0.00396658	0.00146811
482.2	0.00615026	0.00426211	0.0019106
482.4	0.00624756	0.00443379	0.00196465
482.6	0.00665004	0.00453582	0.00232438
482.8	0.00658157	0.00459681	0.00193901
483	0.00671131	0.00481139	0.00188812
483.2	0.0068427	0.00526171	0.00210035
483.4	0.00714785	0.0059201	0.00210267
483.6	0.00729435	0.00629003	0.00201932
483.8	0.00752181	0.00630049	0.00187967
484	0.00796342	0.0066772	0.00183077
484.2	0.0081705	0.00699947	0.00171607
484.4	0.00829718	0.00735862	0.00199437
484.6	0.008927	0.007071	0.0021447
484.8	0.00961102	0.007162	0.00245237
485	0.00876305	0.00597181	0.00126897
485.2	0.00787509	0.00506525	0.00042447
485.4	0.008146	0.00515552	0.00098903
485.6	0.00819526	0.00491276	0.00113294
485.8	0.00833248	0.00469424	0.0015033
486	0.00828216	0.00468222	0.0018475
486.2	0.00876109	0.00499371	0.00196133
486.4	0.00921234	0.00496808	0.00198085
486.6	0.00920759	0.0049907	0.00232966
486.8	0.00927043	0.00528753	0.00260464
487	0.00968432	0.00538662	0.00270488
487.2	0.00952429	0.0055224	0.00285456
487.4	0.00943557	0.0054194	0.00281758
487.6	0.00960167	0.00546469	0.00300393
487.8	0.00953906	0.00542935	0.00316008
488	0.00949173	0.00566725	0.00293422
488.2	0.00917288	0.00566338	0.00287524
488.4	0.00894032	0.00538143	0.00331784
488.6	0.00882498	0.0047652	0.00279046
488.8	0.00812476	0.0042397	0.0021772
489	0.00774652	0.00407585	0.00184863
489.2	0.0075634	0.00441831	0.00169277
489.4	0.0082222	0.0045992	0.00169831
489.6	0.00797814	0.00461953	0.00164665
489.8	0.00806396	0.00519337	0.00155819
490	0.00862905	0.00600892	0.00168436
490.2	0.00899985	0.00652051	0.00209319
490.4	0.00883552	0.00629488	0.00212013
490.6	0.00865132	0.00620428	0.00190865
490.8	0.00859234	0.00586202	0.00159009
491	0.00887578	0.00600145	0.0014698
491.2	0.00852231	0.00580458	0.001547
491.4	0.00850861	0.00564017	0.00182143
491.6	0.00859313	0.00568276	0.00223855
491.8	0.00795044	0.00491072	0.00231013
492	0.00766949	0.0049093	0.00242811
492.2	0.00770142	0.00478854	0.00294403
492.4	0.0082618	0.00471001	0.00379585
492.6	0.0077238	0.00453289	0.00320097
492.8	0.00775002	0.00461394	0.00360336
493	0.00802516	0.00468903	0.00352246
493.2	0.00833396	0.004977	0.00313012
493.4	0.00886774	0.00507546	0.00331577
493.6	0.00880673	0.00539397	0.00336975
493.8	0.00868297	0.00575738	0.00322914
494	0.00883814	0.00543188	0.00327772
494.2	0.00863906	0.00493044	0.00316551
494.4	0.00838482	0.00450647	0.00280862
494.6	0.00846556	0.0045775	0.00259164
494.8	0.00832224	0.00430743	0.00238261
495	0.00895473	0.00443058	0.00243175
495.2	0.00861231	0.00420532	0.00268615
495.4	0.0086652	0.00379406	0.00275146
495.6	0.00884968	0.00426244	0.0029668
495.8	0.00887491	0.00469148	0.0031221
496	0.00889464	0.00520435	0.00354852
496.2	0.00954509	0.00562024	0.0035042
496.4	0.00962377	0.00581309	0.00382762
496.6	0.00887326	0.00549009	0.00312561
496.8	0.00902912	0.00508549	0.00288445
497	0.00939835	0.00484223	0.00231956
497.2	0.0095968	0.00527195	0.00268373
497.4	0.00968374	0.00529861	0.00290127
497.6	0.00922038	0.00513492	0.00284027
497.8	0.00863532	0.00478213	0.00270868
498	0.00900497	0.00452007	0.00290805
498.2	0.00911766	0.00437542	0.00301642
498.4	0.00862107	0.00449235	0.00345695
498.6	0.00870123	0.00437283	0.00369104
498.8	0.00855478	0.00422211	0.00372216
499	0.00891878	0.00442317	0.00410227
499.2	0.00854107	0.00430728	0.00456482
499.4	0.00889501	0.00509009	0.00478433
499.6	0.00922483	0.00564198	0.00482762
499.8	0.0086985	0.00560838	0.00457154
500	0.00881808	0.0052546	0.00417789
500.2	0.0085805	0.00483121	0.00332354
500.4	0.00851152	0.00481499	0.00363239
500.6	0.0078167	0.00445852	0.00287102
500.8	0.0076736	0.00391246	0.00251559
501	0.00772709	0.00401893	0.00246022
501.2	0.00776215	0.00396635	0.00261603
501.4	0.00814225	0.00384737	0.00237493
501.6	0.00841538	0.00385305	0.00227597
501.8	0.00844293	0.00391486	0.00202568
502	0.00885533	0.0039298	0.00231382
502.2	0.00831607	0.00402783	0.00222277
502.4	0.00837565	0.00450719	0.00280247
502.6	0.00844633	0.00423205	0.00302652
502.8	0.00813625	0.00409728	0.00283293
503	0.00863786	0.00472379	0.00336749
503.2	0.00833438	0.00445221	0.00343139
503.4	0.00820803	0.00451149	0.00342413
503.6	0.00825855	0.0043679	0.00294734
503.8	0.00831009	0.00417368	0.00284096
504	0.00871833	0.00396049	0.0026661
504.2	0.0085264	0.00417133	0.00279239
504.4	0.00870898	0.00448869	0.00296598
504.6	0.00819289	0.00474973	0.00263063
504.8	0.00800045	0.00434186	0.00227437
505	0.00840874	0.00433199	0.00168275
505.2	0.0089739	0.00480701	0.00203929
505.4	0.00982442	0.00565252	0.00226895
505.6	0.00986073	0.00564996	0.00202121
505.8	0.00939376	0.00561206	0.00172131
506	0.00928341	0.00541544	0.00154324
506.2	0.00940121	0.00552858	0.00176638
506.4	0.00965015	0.00522475	0.00220554
506.6	0.00953936	0.00455713	0.00246618
506.8	0.00942556	0.00439693	0.00229363
507	0.00992792	0.00474271	0.00288504
507.2	0.00951392	0.0041715	0.00287571
507.4	0.00955155	0.004409	0.00326934
507.6	0.0100851	0.00453277	0.00342704
507.8	0.0101662	0.00395185	0.00341665
508	0.0102904	0.00385287	0.00393778
508.2	0.009982	0.00387948	0.00426472
508.4	0.00973752	0.00398242	0.00390935
508.6	0.00954348	0.00399697	0.00387499
508.8	0.00970151	0.0038074	0.00394524
509	0.0098069	0.00374199	0.00390136
509.2	0.00990164	0.00417448	0.00431705
509.4	0.009907	0.00397268	0.00376173
509.6	0.00939652	0.00322605	0.00318404
509.8	0.00961987	0.00342933	0.00280695
510	0.00961979	0.00341115	0.0022447
510.2	0.00975929	0.00284438	0.00243683
510.4	0.00966855	0.00287221	0.00239147
510.6	0.00942709	0.00257109	0.00210601
510.8	0.00925836	0.00286046	0.00209485
511	0.00956265	0.00334686	0.00220465
511.2	0.00930542	0.00322273	0.00197095
511.4	0.00977292	0.0035153	0.00225434
511.6	0.00997501	0.00322713	0.00155653
511.8	0.00963008	0.00297326	0.00123242
512	0.00956576	0.00300149	0.00150233
512.2	0.0095019	0.00325967	0.00138158
512.4	0.0101133	0.00357915	0.00164306
512.6	0.010735	0.003968	0.00204542
512.8	0.0111171	0.00428985	0.00231203
513	0.0109208	0.00428973	0.00239595
513.2	0.0113103	0.00469819	0.00264953
513.4	0.0114905	0.00485005	0.00298246
513.6	0.0111173	0.00479959	0.00273925
513.8	0.011599	0.00527702	0.00289309
514	0.0116999	0.00560226	0.00287583
514.2	0.0114628	0.00516006	0.00340789
514.4	0.011341	0.00602118	0.00342321
514.6	0.0113212	0.00588472	0.00353606
514.8	0.011567	0.00668318	0.00427055
515	0.0113209	0.00622526	0.00401641
515.2	0.0110338	0.00628989	0.00382651
515.4	0.0112619	0.0061278	0.00385983
515.6	0.0106993	0.00610908	0.00352513
515.8	0.0101646	0.00553032	0.00366328
516	0.00992322	0.00519005	0.0038974
516.2	0.010315	0.00539734	0.00397082
516.4	0.0102859	0.00543993	0.00422354
516.6	0.0103066	0.00579123	0.00402127
516.8	0.00971743	0.00523147	0.00356663
517	0.00947984	0.00529866	0.00416821
517.2	0.00939596	0.00508848	0.00429819
517.4	0.0090376	0.00493932	0.00462231
517.6	0.00863369	0.00537593	0.00448075
517.8	0.00916956	0.00562187	0.00470935
518	0.00928806	0.00599434	0.0048004
518.2	0.00928804	0.00610568	0.0047767
518.4	0.00948644	0.00653302	0.00443835
518.6	0.00973544	0.00644851	0.00454153
518.8	0.00965638	0.00614615	0.00450351
519	0.00952688	0.00585488	0.0041754
519.2	0.00941405	0.00567958	0.00398207
519.4	0.00942872	0.00514114	0.00361696
519.6	0.00920381	0.00506878	0.00412283
519.8	0.0093137	0.00407851	0.00414262
520	0.00951084	0.00327233	0.00392597
520.2	0.00961808	0.0027338	0.00328924
520.4	0.00948275	0.00206376	0.00302604
520.6	0.00958157	0.00172763	0.00303934
520.8	0.00908928	0.00075674	0.00293792
521	0.0089927	0.00060044	0.00334257
521.2	0.00903534	0.00010146	0.00340423
521.4	0.00900933	0.00033777	0.00338986
521.6	0.00932459	0.00102912	0.00366343
521.8	0.00957514	0.00089309	0.00349195
522	0.00986009	0.00108865	0.00354191
522.2	0.0105252	0.00167775	0.00360308
522.4	0.010719	0.00195047	0.00335438
522.6	0.011227	0.00268206	0.003446
522.8	0.0119813	0.00307663	0.00379189
523	0.011856	0.00382077	0.00377098
523.2	0.0116295	0.00415329	0.0040034
523.4	0.0115129	0.00461652	0.00394529
523.6	0.0115446	0.0046857	0.0048126
523.8	0.0113305	0.00491991	0.0048201
524	0.0116088	0.0049485	0.00462612
524.2	0.0113983	0.00472392	0.00430295
524.4	0.0110333	0.0043677	0.00415574
524.6	0.0107123	0.00414041	0.00408674
524.8	0.0105618	0.00368961	0.00414568
525	0.0103491	0.00387174	0.00402844
525.2	0.0104579	0.00375505	0.00395595
525.4	0.0106322	0.00385338	0.00389023
525.6	0.0108498	0.00404762	0.00435776
525.8	0.0110241	0.00379159	0.0042845
526	0.0111074	0.00375626	0.00436606
526.2	0.0116083	0.00463325	0.00443061
526.4	0.0115521	0.00505501	0.00429528
526.6	0.011655	0.00505129	0.00438912
526.8	0.0113768	0.0049073	0.00429668
527	0.0110131	0.00540921	0.00402547
527.2	0.0104579	0.00527874	0.00435107
527.4	0.00954235	0.00484746	0.0041697
527.6	0.00904238	0.00449427	0.00385687
527.8	0.00913305	0.00433422	0.00348498
528	0.00904403	0.00343577	0.00263109
528.2	0.00846343	0.0023295	0.00198754
528.4	0.00829476	0.00169002	0.00136333
528.6	0.00843604	0.00134393	0.00157194
528.8	0.00836461	0.00086555	0.00183403
529	0.00837264	0.00061508	0.00175821
529.2	0.00876279	0.00052472	0.00190631
529.4	0.00918072	0.00038174	0.00234064
529.6	0.00922658	0.00039054	0.00267305
529.8	0.0093116	0.00027282	0.00288366
530	0.00899871	0.00069318	0.00320683
530.2	0.00914651	0.00126718	0.00333361
530.4	0.0091511	0.00139855	0.00362962
530.6	0.00898197	0.00147426	0.00371522
530.8	0.00944014	0.00245282	0.00394493
531	0.0100544	0.00337845	0.00396393
531.2	0.0099828	0.00351329	0.00428757
531.4	0.00974514	0.0035311	0.00375314
531.6	0.0101998	0.00396237	0.0031988
531.8	0.0107759	0.00434959	0.00299927
532	0.0109469	0.0046793	0.00263702
532.2	0.0111542	0.00461854	0.00262431
532.4	0.0111651	0.00467744	0.00246359
532.6	0.011284	0.00466597	0.00309558
532.8	0.0109068	0.00484458	0.00306996
533	0.0110178	0.00482043	0.0033929
533.2	0.0105653	0.00442347	0.00302167
533.4	0.0103244	0.0041078	0.00308477
533.6	0.00945871	0.00370667	0.00318053
533.8	0.00892655	0.00351741	0.00327281
534	0.0085293	0.00368163	0.00363008
534.2	0.00863855	0.0039231	0.0035761
534.4	0.00849067	0.00393093	0.00328109
534.6	0.00846264	0.00402284	0.00307107
534.8	0.00867125	0.00354616	0.00245042
535	0.00862879	0.00342451	0.00182581
535.2	0.00879282	0.00353308	0.00204252
535.4	0.0082891	0.00282121	0.00143326
535.6	0.00854514	0.00338736	0.00132839
535.8	0.00934204	0.00339276	0.00119129
536	0.00964104	0.00363231	0.0015235
536.2	0.00948503	0.00331199	0.00148307
536.4	0.00944913	0.00328251	0.00146184
536.6	0.00940772	0.00358141	0.00184564
536.8	0.00944026	0.00398065	0.00228061
537	0.00913978	0.00398029	0.00248968
537.2	0.00860372	0.00389989	0.0024113
537.4	0.00843633	0.00381821	0.00287363
537.6	0.00800472	0.00372848	0.00311577
537.8	0.00837393	0.00419062	0.00341928
538	0.00829658	0.00436623	0.00338991
538.2	0.00865836	0.00477053	0.0034044
538.4	0.00837735	0.00453673	0.00336674
538.6	0.00848338	0.00452551	0.00367015
538.8	0.0087196	0.00372862	0.0035602
539	0.00906749	0.00411372	0.00391316
539.2	0.00929298	0.00429776	0.00447856
539.4	0.00923868	0.00374543	0.00413604
539.6	0.00979425	0.00415582	0.00401488
539.8	0.0107632	0.00445213	0.00423256
540	0.0108139	0.00444139	0.00434398
540.2	0.0110182	0.00389328	0.00400643
540.4	0.0109761	0.00374985	0.00385764
540.6	0.0111001	0.00375588	0.003761
540.8	0.0113079	0.00381788	0.00401352
541	0.0102616	0.00287187	0.00345185
541.2	0.0105512	0.00243764	0.00304114
541.4	0.0107793	0.00245761	0.00314516
541.6	0.0104205	0.00269091	0.00307775
541.8	0.0100829	0.00271248	0.00261521
542	0.00961401	0.00264334	0.0022427
542.2	0.00986384	0.00287336	0.00252287
542.4	0.00948528	0.00302431	0.00270796
542.6	0.00956153	0.00329916	0.0030678
542.8	0.00999386	0.00316693	0.00303279
543	0.0093024	0.00386849	0.00340923
543.2	0.00861157	0.00366872	0.00334316
543.4	0.00883395	0.00394728	0.00326359
543.6	0.00860469	0.00405139	0.00347401
543.8	0.00859863	0.00440018	0.0040831
544	0.00844334	0.00432832	0.00419223
544.2	0.00845256	0.00423819	0.00445267
544.4	0.00833578	0.00453632	0.00499233
544.6	0.00826296	0.00474534	0.00513535
544.8	0.00847061	0.00453758	0.00545184
545	0.00837365	0.00440004	0.00562846
545.2	0.00958503	0.00532806	0.00607909
545.4	0.0092824	0.00535654	0.00630814
545.6	0.00911243	0.00505948	0.00581172
545.8	0.00958576	0.00526434	0.00546044
546	0.00984499	0.00511078	0.005506
546.2	0.0100477	0.00458841	0.00520053
546.4	0.00995709	0.00459669	0.00534094
546.6	0.00994355	0.00501113	0.00537714
546.8	0.0101591	0.00457862	0.00508939
547	0.00908987	0.00417033	0.00478167
547.2	0.00925587	0.00366722	0.00437667
547.4	0.00984508	0.00382651	0.00465861
547.6	0.00947658	0.00347234	0.0044433
547.8	0.00951279	0.00381386	0.00468106
548	0.00974558	0.00388231	0.00479579
548.2	0.00958209	0.00373333	0.00489564
548.4	0.00966801	0.00431582	0.00515118
548.6	0.00926889	0.00396049	0.004381
548.8	0.00935743	0.00372226	0.00456167
549	0.00892935	0.00395407	0.00481373
549.2	0.00870492	0.00381269	0.0045934
549.4	0.00798005	0.00355934	0.00406738
549.6	0.00831875	0.00348313	0.00352747
549.8	0.00831887	0.00339671	0.00380936
550	0.00804431	0.0029992	0.00373067
550.2	0.00771635	0.00319816	0.00356335
550.4	0.00719159	0.00311116	0.00354813
550.6	0.00697487	0.00335075	0.00339469
550.8	0.00667691	0.00273365	0.00286781
551	0.00609529	0.00249627	0.00240253
551.2	0.00680965	0.00274462	0.00269348
551.4	0.00715069	0.00269016	0.00283797
551.6	0.0074252	0.00326573	0.00312043
551.8	0.00813742	0.0039166	0.00399307
552	0.00796818	0.00373914	0.00390406
552.2	0.00800173	0.00365748	0.00386009
552.4	0.00814244	0.00358638	0.00401932
552.6	0.00762206	0.00301078	0.00373878
552.8	0.00770416	0.00351265	0.00406673
553	0.00762331	0.00303924	0.003691
553.2	0.00771667	0.00292077	0.00366827
553.4	0.00773907	0.00287807	0.00372691
553.6	0.0085784	0.00328712	0.00388748
553.8	0.00863094	0.00336056	0.00440834
554	0.00863066	0.00394373	0.00449554
554.2	0.0083226	0.0036951	0.00398324
554.4	0.00791888	0.00324411	0.00345206
554.6	0.00807767	0.00323699	0.00306671
554.8	0.00733233	0.0030092	0.00229505
555	0.00755887	0.00291759	0.00228566
555.2	0.00794074	0.00324385	0.00249421
555.4	0.0080479	0.00351008	0.00264843
555.6	0.00860631	0.00384064	0.0031919
555.8	0.00872243	0.00367445	0.00353336
556	0.00828474	0.00340773	0.00318118
556.2	0.00840699	0.00348117	0.00347906
556.4	0.00880804	0.00425157	0.00386978
556.6	0.00872142	0.00420151	0.00357568
556.8	0.00916697	0.00438102	0.00310088
557	0.00942965	0.0039694	0.00308663
557.2	0.00960277	0.00406606	0.00347675
557.4	0.00984519	0.00447535	0.00367663
557.6	0.0104271	0.00478573	0.00383306
557.8	0.0100685	0.00427986	0.00365411
558	0.0100301	0.00419743	0.00331445
558.2	0.00977693	0.00335099	0.0026532
558.4	0.00975222	0.00340451	0.00258789
558.6	0.00968933	0.00349751	0.00241875
558.8	0.00896646	0.00326957	0.00211103
559	0.00941724	0.00298789	0.00246
559.2	0.00920584	0.00272719	0.00209556
559.4	0.00905575	0.00280319	0.00255695
559.6	0.00941698	0.00233822	0.00281713
559.8	0.00962856	0.00237371	0.00297346
560	0.00978908	0.00283813	0.00291933
560.2	0.00985714	0.00290675	0.00333902
560.4	0.0100227	0.00277771	0.00306434
560.6	0.0100799	0.00208198	0.00261721
560.8	0.0108507	0.00223696	0.00288522
561	0.0110626	0.00202347	0.00281596
561.2	0.0109527	0.00217908	0.00279337
561.4	0.011202	0.00266276	0.00290654
561.6	0.0114117	0.00272007	0.00292922
561.8	0.0111843	0.00296067	0.00269933
562	0.0109642	0.00301348	0.00271834
562.2	0.0104188	0.00311425	0.00273325
562.4	0.0105692	0.0045747	0.00352247
562.6	0.0100385	0.00485402	0.00371965
562.8	0.00962302	0.00502967	0.00363339
563	0.00998442	0.00572779	0.00372115
563.2	0.0095975	0.00614213	0.00341821
563.4	0.00937672	0.00634603	0.00352304
563.6	0.0100781	0.00615819	0.00331851
563.8	0.0104389	0.0064536	0.00337539
564	0.0101807	0.0059686	0.00335182
564.2	0.00997308	0.00567238	0.00338532
564.4	0.0102749	0.00540759	0.0034205
564.6	0.0110549	0.00552518	0.00356376
564.8	0.0113503	0.00540889	0.00353132
565	0.0112872	0.00505547	0.00330788
565.2	0.0111456	0.00540057	0.00348232
565.4	0.0112588	0.00495029	0.00343322
565.6	0.0113455	0.0047618	0.00339312
565.8	0.0108048	0.00507521	0.00337704
566	0.0102485	0.00475172	0.00318449
566.2	0.00987319	0.005062	0.00315401
566.4	0.00935871	0.00572355	0.00336916
566.6	0.00894138	0.00553808	0.00318694
566.8	0.00902624	0.00607714	0.00321849
567	0.00896459	0.00626992	0.00301207
567.2	0.00880876	0.00613044	0.00281106
567.4	0.00888454	0.0061652	0.00282405
567.6	0.00913242	0.00626057	0.00326522
567.8	0.00914073	0.00624383	0.0031697
568	0.00865146	0.00543811	0.00340777
568.2	0.00830924	0.00572046	0.00376345
568.4	0.00845637	0.00537417	0.00383699
568.6	0.00847871	0.00508615	0.00341077
568.8	0.0081146	0.00507853	0.0032911
569	0.00810283	0.00500189	0.00337358
569.2	0.00800786	0.00496615	0.00313525
569.4	0.00749628	0.0044387	0.00272759
569.6	0.00727594	0.00460639	0.00287837
569.8	0.0070583	0.00455875	0.00263028
570	0.00711368	0.00426159	0.00266324
570.2	0.00711339	0.00421685	0.00293018
570.4	0.00745837	0.00464311	0.0033569
570.6	0.00832204	0.00435696	0.00375409
570.8	0.00867612	0.0045293	0.0038969
571	0.00899751	0.00449537	0.0043521
571.2	0.00921523	0.00478042	0.00448571
571.4	0.0094877	0.00518333	0.0048234
571.6	0.00934194	0.00534545	0.00491666
571.8	0.00946132	0.00508622	0.00478824
572	0.00882312	0.00473752	0.00493089
572.2	0.00853446	0.00492071	0.00508987
572.4	0.00845602	0.00442876	0.00458671
572.6	0.00821512	0.00449868	0.00433088
572.8	0.00827883	0.00517838	0.00433913
573	0.00843897	0.00566692	0.00446748
573.2	0.00812897	0.00553769	0.00424485
573.4	0.00749498	0.00553336	0.00426427
573.6	0.00718187	0.00496544	0.00430842
573.8	0.00724311	0.00446938	0.00386391
574	0.00757437	0.00460543	0.00419563
574.2	0.00772911	0.00431533	0.00402572
574.4	0.00746763	0.00407316	0.00371039
574.6	0.00758972	0.00337604	0.00329679
574.8	0.00707283	0.00324604	0.00298413
575	0.00716357	0.00337652	0.00336304
575.2	0.00688483	0.00362692	0.0028374
575.4	0.00716526	0.0038968	0.00299508
575.6	0.00691063	0.00385509	0.00286347
575.8	0.00703417	0.00381181	0.00246986
576	0.00711891	0.00375359	0.00224422
576.2	0.00712474	0.00360962	0.00228149
576.4	0.00742313	0.00371773	0.00231925
576.6	0.00825957	0.00435587	0.00249342
576.8	0.00914306	0.00496648	0.00283423
577	0.00947839	0.00532945	0.0034092
577.2	0.00931806	0.00494552	0.0034441
577.4	0.00971546	0.00543055	0.00394575
577.6	0.00988941	0.00570015	0.00409009
577.8	0.0105972	0.00556813	0.00414707
578	0.0111047	0.00598491	0.0046923
578.2	0.0108039	0.00593118	0.00455317
578.4	0.0100887	0.00583632	0.00446585
578.6	0.0105443	0.00628799	0.00500209
578.8	0.0103297	0.00630546	0.00505068
579	0.0104265	0.00663788	0.0054284
579.2	0.0101035	0.00666038	0.00536276
579.4	0.0101691	0.00665646	0.00534645
579.6	0.00941742	0.00631992	0.0046479
579.8	0.00876009	0.00580585	0.00390175
580	0.00849707	0.00546002	0.00356893
580.2	0.00837158	0.00535868	0.00318287
580.4	0.00870186	0.00517015	0.00305821
580.6	0.00902898	0.00486847	0.00287254
580.8	0.00846732	0.00495754	0.00264855
581	0.00845583	0.00498689	0.00276903
581.2	0.00787106	0.0047627	0.00215442
581.4	0.00832519	0.00533481	0.00214449
581.6	0.00857862	0.00546604	0.00239032
581.8	0.00905526	0.00505448	0.00253544
582	0.00945946	0.00590539	0.00294135
582.2	0.0092349	0.005845	0.00304837
582.4	0.00919365	0.0061698	0.00298987
582.6	0.00962305	0.00658276	0.00368791
582.8	0.0100118	0.00658289	0.00402173
583	0.0102645	0.00736946	0.00486949
583.2	0.0102016	0.00707449	0.00531681
583.4	0.0104358	0.00729821	0.00519179
583.6	0.00984102	0.00706986	0.0049478
583.8	0.00978761	0.00690973	0.00515148
584	0.0100226	0.00676178	0.00508843
584.2	0.0101369	0.00641271	0.00489086
584.4	0.0102821	0.0063824	0.00513001
584.6	0.00999861	0.00642623	0.00477551
584.8	0.00932688	0.00631653	0.00422834
585	0.00930613	0.00593866	0.00365554
585.2	0.00923695	0.00588895	0.00363876
585.4	0.00955861	0.00636892	0.00351407
585.6	0.0100003	0.0066093	0.00360074
585.8	0.0101732	0.00672136	0.00355916
586	0.0100498	0.00646643	0.00355592
586.2	0.00942226	0.00608929	0.00322091
586.4	0.00932142	0.00625851	0.00283834
586.6	0.00916313	0.00636293	0.00345588
586.8	0.00913029	0.00627673	0.0037074
587	0.00915294	0.00623251	0.0037819
587.2	0.00909851	0.00542737	0.0032972
587.4	0.00925084	0.00614046	0.00292727
587.6	0.00894822	0.00586471	0.00271685
587.8	0.00897468	0.00550805	0.00252023
588	0.00924449	0.00487786	0.00237196
588.2	0.00917997	0.00480285	0.00210811
588.4	0.00938382	0.00483226	0.00228046
588.6	0.00943562	0.00470101	0.00172649
588.8	0.00990088	0.00467776	0.00174466
589	0.0104742	0.0051193	0.00144896
589.2	0.0113515	0.00556	0.0021614
589.4	0.0116351	0.00579524	0.00199182
589.6	0.0120515	0.0060576	0.00234534
589.8	0.0119868	0.00619539	0.00245348
590	0.0110961	0.00537617	0.00223844
590.2	0.0109999	0.00575922	0.002553
590.4	0.0108923	0.00568848	0.00291078
590.6	0.00981134	0.00491422	0.0025755
590.8	0.00922108	0.00443642	0.002301
591	0.00967703	0.00447864	0.00261525
591.2	0.00969078	0.00462207	0.00311243
591.4	0.00949088	0.00488068	0.0031023
591.6	0.00947501	0.00462463	0.00324817
591.8	0.00949399	0.00456264	0.00365531
592	0.00916196	0.00397153	0.00393579
592.2	0.00907324	0.00389334	0.0039206
592.4	0.00930513	0.00406751	0.00434504
592.6	0.00935103	0.00447701	0.00437777
592.8	0.0092735	0.00470231	0.00450679
593	0.00904401	0.00495571	0.00442993
593.2	0.00861593	0.00496492	0.00448871
593.4	0.0085977	0.00538667	0.00418891
593.6	0.0084337	0.00593968	0.00401133
593.8	0.00808339	0.00550396	0.00369426
594	0.007826	0.00482742	0.00336479
594.2	0.00862787	0.00521504	0.00322854
594.4	0.00849908	0.00462404	0.00278349
594.6	0.00855861	0.0040835	0.0021041
594.8	0.00927726	0.00397837	0.00213344
595	0.0100425	0.00368443	0.00223502
595.2	0.0102456	0.00337649	0.00223349
595.4	0.0102843	0.00299029	0.00156519
595.6	0.0103868	0.00273989	0.00151282
595.8	0.0109695	0.00267788	0.00199129
596	0.0107327	0.00202845	0.00217937
596.2	0.0115397	0.00227767	0.00281935
596.4	0.0106962	0.00228446	0.00305587
596.6	0.0102224	0.00239661	0.00298363
596.8	0.00966504	0.0025824	0.00291584
597	0.00909428	0.0029501	0.00306938
597.2	0.00843609	0.00306262	0.00287168
597.4	0.00858808	0.00326353	0.00278621
597.6	0.00797386	0.00340847	0.00283682
597.8	0.00815763	0.0033279	0.00294371
598	0.0080515	0.0035145	0.00257852
598.2	0.00824367	0.00401162	0.00246028
598.4	0.00824556	0.00427651	0.00241274
598.6	0.00847286	0.00477299	0.00217762
598.8	0.00812962	0.00498562	0.00177006
599	0.00807294	0.00486179	0.00158922
599.2	0.00814241	0.00503324	0.0016479
599.4	0.00825978	0.00508512	0.00148545
599.6	0.00899397	0.00558837	0.00215725
599.8	0.00974701	0.00586947	0.00279045
600	0.00975198	0.0056819	0.00307597
600.2	0.0101023	0.00571183	0.00331621
600.4	0.009403	0.00512547	0.00302663
600.6	0.00988922	0.00565372	0.00313543
600.8	0.00985277	0.00562164	0.00335003
601	0.00956235	0.00560933	0.00357295
601.2	0.00934667	0.00552278	0.00332436
601.4	0.00929063	0.00511628	0.00361099
601.6	0.00926718	0.005469	0.00380405
601.8	0.00957776	0.00513676	0.0040522
602	0.00873441	0.00480467	0.00337039
602.2	0.00912928	0.0051182	0.00329515
602.4	0.00881725	0.00507771	0.0029356
602.6	0.00871108	0.00508327	0.00283962
602.8	0.00890142	0.00544533	0.00312007
603	0.00918651	0.00546349	0.00354586
603.2	0.00920784	0.00560085	0.00382977
603.4	0.0100724	0.00609572	0.00460212
603.6	0.0106078	0.00652875	0.00514455
603.8	0.0108847	0.00638647	0.00531856
604	0.0111006	0.00603808	0.00539209
604.2	0.0108163	0.0057944	0.00543921
604.4	0.0111284	0.00544373	0.00542172
604.6	0.0115639	0.00613156	0.00563004
604.8	0.0114701	0.00539779	0.00547464
605	0.0111682	0.00542314	0.00525325
605.2	0.0114365	0.00550981	0.00473827
605.4	0.0109684	0.0048274	0.00412747
605.6	0.0109698	0.0053241	0.00369002
605.8	0.0104538	0.00523263	0.00332265
606	0.00965941	0.00510143	0.0023615
606.2	0.00990187	0.00548931	0.00200762
606.4	0.00908011	0.005451	0.00141208
606.6	0.00855488	0.0059682	0.00099427
606.8	0.00870126	0.00664485	0.00170523
607	0.00836272	0.00669841	0.00227567
607.2	0.00828956	0.00669955	0.00272409
607.4	0.00871535	0.00708403	0.0033132
607.6	0.0087529	0.00697295	0.00341153
607.8	0.00844432	0.00678067	0.00377586
608	0.00812058	0.00617846	0.00343633
608.2	0.00797996	0.00598151	0.00349276
608.4	0.00827011	0.00549469	0.00364983
608.6	0.00864511	0.00562528	0.00375045
608.8	0.00878099	0.0056297	0.00405718
609	0.00934996	0.00588713	0.00422209
609.2	0.00934433	0.0058653	0.0035534
609.4	0.00889913	0.00509926	0.00301018
609.6	0.00906306	0.00533268	0.00292399
609.8	0.00863468	0.00537321	0.00237678
610	0.00857708	0.0051884	0.00180964
610.2	0.00887754	0.00532544	0.0015487
610.4	0.00825551	0.00530998	0.00093718
610.6	0.00863483	0.0057015	0.00142067
610.8	0.0093414	0.00586075	0.00236517
611	0.00950225	0.00600508	0.00315934
611.2	0.00957741	0.00601443	0.00306193
611.4	0.00970877	0.00603693	0.00269306
611.6	0.00912677	0.00542551	0.00236434
611.8	0.00883609	0.00560129	0.00223349
612	0.00861037	0.00525263	0.00183802
612.2	0.00886395	0.00562607	0.00227849
612.4	0.00899873	0.00584821	0.00290983
612.6	0.0093175	0.00637984	0.00337943
612.8	0.00899872	0.0062631	0.00380572
613	0.00883405	0.00563414	0.00340446
613.2	0.00815657	0.00488929	0.00256365
613.4	0.00768788	0.00424139	0.002608
613.6	0.00735413	0.00413428	0.00265236
613.8	0.00693315	0.00428275	0.00264911
614	0.0072619	0.00431741	0.00280167
614.2	0.00774579	0.00449332	0.00277913
614.4	0.00782781	0.00495019	0.00297824
614.6	0.00883869	0.00557293	0.00398781
614.8	0.00917999	0.00574132	0.00422456
615	0.00939721	0.00559399	0.00434433
615.2	0.00949591	0.00587475	0.0039676
615.4	0.00946233	0.00590688	0.00386966
615.6	0.00951389	0.00595786	0.00380761
615.8	0.0103608	0.00702633	0.00381877
616	0.0105856	0.00703151	0.0038888
616.2	0.0109486	0.0073336	0.00441024
616.4	0.0110574	0.00725226	0.00444233
616.6	0.0109459	0.00707257	0.00416619
616.8	0.0104488	0.0067538	0.00370199
617	0.0109465	0.00712212	0.00384176
617.2	0.0105086	0.00661043	0.00351897
617.4	0.00986479	0.00687185	0.00390498
617.6	0.0102199	0.0068973	0.00404487
617.8	0.01012	0.00728187	0.00453069
618	0.0106194	0.00752276	0.00452943
618.2	0.0107091	0.0077426	0.00418674
618.4	0.0103112	0.00724935	0.00467325
618.6	0.0104684	0.00739879	0.0051054
618.8	0.0100128	0.00684753	0.00482705
619	0.00959495	0.00626101	0.0047371
619.2	0.00911833	0.0063839	0.004594
619.4	0.00887909	0.00625637	0.00478222
619.6	0.00884582	0.00602193	0.00451248
619.8	0.00862041	0.00572017	0.00439708
620	0.00815343	0.00546399	0.00442399
620.2	0.00790613	0.00511	0.00432041
620.4	0.00821366	0.00518456	0.00374577
620.6	0.00782074	0.00501596	0.00364423
620.8	0.00771195	0.00550564	0.00358987
621	0.00819044	0.00596302	0.00338686
621.2	0.00725528	0.00599682	0.00245188
621.4	0.00701832	0.00644596	0.00233138
621.6	0.00702822	0.00634196	0.00210783
621.8	0.00655852	0.00640044	0.00203627
622	0.0066886	0.00623235	0.00112281
622.2	0.00666499	0.00573447	0.00077586
622.4	0.00640667	0.00526644	0.00129919
622.6	0.00681141	0.00579058	0.00161225
622.8	0.00700041	0.00576757	0.00127721
623	0.00713414	0.00565755	0.00178357
623.2	0.00735808	0.00641984	0.00233541
623.4	0.00775577	0.00683254	0.00286138
623.6	0.00810071	0.00684902	0.00318716
623.8	0.00838605	0.00661651	0.00365631
624	0.00835321	0.00664301	0.00363823
624.2	0.00895565	0.00609369	0.00337616
624.4	0.00981105	0.0060961	0.00362239
624.6	0.0101648	0.00564637	0.0038255
624.8	0.0103409	0.00596807	0.0035078
625	0.010475	0.00608091	0.00329971
625.2	0.0100069	0.00635749	0.00322308
625.4	0.00966036	0.00608477	0.00288209
625.6	0.00931408	0.00617322	0.00275374
625.8	0.00928243	0.00602152	0.00250251
626	0.00926346	0.00531348	0.0023259
626.2	0.00961681	0.00511643	0.00249683
626.4	0.00956643	0.00531802	0.00279173
626.6	0.00962916	0.00599269	0.00283236
626.8	0.00945766	0.00580763	0.00255608
627	0.00903207	0.00572911	0.00277741
627.2	0.00856383	0.00601982	0.0026981
627.4	0.00789353	0.00569419	0.00162719
627.6	0.00787367	0.00511462	0.00190813
627.8	0.00777095	0.00447214	0.00171121
628	0.00764646	0.00394659	0.00115907
628.2	0.00784841	0.00333673	0.00102519
628.4	0.00800935	0.00301437	0.0011027
628.6	0.00807331	0.00303574	0.000939
628.8	0.00763478	0.003002	0.00123375
629	0.00813284	0.00357868	0.00177087
629.2	0.0082792	0.00375544	0.00234462
629.4	0.00845944	0.0040395	0.00241051
629.6	0.00849434	0.00414281	0.00282854
629.8	0.00877329	0.00402667	0.00305828
630	0.0090475	0.00388473	0.00323835
630.2	0.00984618	0.00465774	0.00395257
630.4	0.0101174	0.00492286	0.00458228
630.6	0.0106372	0.0053952	0.00486443
630.8	0.0109292	0.00479107	0.00487244
631	0.0110521	0.00513581	0.00474629
631.2	0.0110567	0.00543343	0.00460788
631.4	0.0113039	0.00563665	0.00414862
631.6	0.0118163	0.00572115	0.004625
631.8	0.0118309	0.00575917	0.00434192
632	0.0117238	0.00570819	0.00423937
632.2	0.0111541	0.00534669	0.00414896
632.4	0.0106003	0.00548185	0.00351148
632.6	0.0105002	0.00577723	0.00354745
632.8	0.0102037	0.00556405	0.00368644
633	0.0104056	0.00586264	0.00373252
633.2	0.0101341	0.0057446	0.00390898
633.4	0.00992364	0.00595321	0.00366124
633.6	0.00960532	0.00576326	0.00367212
633.8	0.00967892	0.00590769	0.00374313
634	0.00984902	0.00601898	0.0040088
634.2	0.0103307	0.00632924	0.00476659
634.4	0.0107537	0.00628589	0.00488537
634.6	0.0111569	0.00636111	0.00489361
[truncated: 2,001 more rows]

## Sheet: CH11-P37
Time1	1E-05	2.5E-06	6.25E-07
235	-0.00455727	0.00156403	0.0002402
235.2	-0.00417833	0.00092436	0.00074145
235.4	-0.00347419	0.00054302	0.00128665
235.6	-0.00366501	-0.00014227	0.00136273
235.8	-0.00347034	-0.00050676	0.00139015
236	-0.00318988	-0.00082187	0.00157465
236.2	-0.00317914	-0.00146776	0.00134649
236.4	-0.00313673	-0.00168655	0.00124091
236.6	-0.00265576	-0.00155208	0.00162332
236.8	-0.00234146	-0.00152386	0.00175423
237	-0.00229241	-0.00173969	0.00133723
237.2	-0.00260628	-0.00144771	0.00118729
237.4	-0.00254253	-0.0008706	0.00116681
237.6	-0.00295302	-0.00129213	0.00089131
237.8	-0.00348013	-0.00139992	0.00082675
238	-0.00362669	-0.00115597	0.00105716
238.2	-0.0041604	-0.00139138	0.00086531
238.4	-0.00383756	-0.00087154	0.00100891
238.6	-0.00377394	-0.00102042	0.00148665
238.8	-0.00308673	-0.00057997	0.0019941
239	-0.0036084	-0.00049269	0.00235298
239.2	-0.00338009	-0.00052786	0.00314424
239.4	-0.00334695	-6.628e-05	0.00339907
239.6	-0.00379229	4.288e-05	0.00326849
239.8	-0.00327222	0.00014012	0.00340338
240	-0.00317066	0.00034778	0.00320771
240.2	-0.0031961	0.00054114	0.00283474
240.4	-0.00307811	0.00067942	0.00298754
240.6	-0.00282419	0.0005071	0.00307271
240.8	-0.00293188	0.00045508	0.00293228
241	-0.00337829	0.00010946	0.00218685
241.2	-0.00352549	0.00021157	0.00238176
241.4	-0.00361033	0.00024688	0.00255229
241.6	-0.00402463	-0.00038186	0.00240951
241.8	-0.00453222	-0.00030552	0.00262421
242	-0.00488367	-0.0004521	0.00234768
242.2	-0.00517453	-0.0007278	0.00219695
242.4	-0.00467393	-0.00048179	0.0025079
242.6	-0.00432635	-0.000319	0.0029871
242.8	-0.00430003	-1.594e-05	0.0028964
243	-0.00435451	0.00016475	0.00329079
243.2	-0.0033978	0.00095487	0.00373375
243.4	-0.00299688	0.00135687	0.00386742
243.6	-0.00264452	0.00159371	0.00409994
243.8	-0.002172	0.00151827	0.00381734
244	-0.00238222	0.00158253	0.00323557
244.2	-0.00223407	0.0012943	0.00352581
244.4	-0.00255546	0.00052101	0.00353897
244.6	-0.0025959	0.00031278	0.0030398
244.8	-0.00294449	0.00015957	0.0023678
245	-0.00344834	-0.00072919	0.0015948
245.2	-0.00351897	-0.0007327	0.00152543
245.4	-0.00355595	-0.00051965	0.00150551
245.6	-0.0039027	-0.00086051	0.00130709
245.8	-0.00448025	-0.00121027	0.00105488
246	-0.00438849	-0.0009806	0.00116581
246.2	-0.00411604	-0.00058411	0.00147987
246.4	-0.00383008	-0.00041983	0.00199207
246.6	-0.00362398	-0.00044863	0.00202676
246.8	-0.00433454	-0.00029147	0.00162491
247	-0.00386629	-0.00023076	0.00182496
247.2	-0.00341038	-0.00031536	0.00200054
247.4	-0.00367443	-0.00022962	0.00244036
247.6	-0.00362298	-0.00028961	0.00266708
247.8	-0.00354984	-0.00056448	0.00254908
248	-0.00394785	-0.00085861	0.00255037
248.2	-0.00322896	-0.00089058	0.0032432
248.4	-0.00378362	-0.0009216	0.00278964
248.6	-0.00394518	-0.00069061	0.00211583
248.8	-0.00425381	-0.00088156	0.0017722
249	-0.00419827	-0.00088834	0.00230992
249.2	-0.00373458	0.00015423	0.00256899
249.4	-0.00320556	0.00027261	0.00308978
249.6	-0.00373905	5.264e-05	0.00309467
249.8	-0.00331581	0.00027056	0.00325487
250	-0.00317742	0.00058757	0.00345453
250.2	-0.00309973	0.0012576	0.00350005
250.4	-0.00338716	0.00065814	0.00303348
250.6	-0.00322471	0.00094329	0.00298643
250.8	-0.00380086	0.00053842	0.00242921
251	-0.00360325	5.35e-05	0.00236865
251.2	-0.00364967	-5.691e-05	0.00234917
251.4	-0.00358876	0.00033532	0.00215067
251.6	-0.00316173	0.00040554	0.00237962
251.8	-0.0031942	0.00107278	0.00257763
252	-0.00332316	0.00051046	0.00226965
252.2	-0.00272746	0.00069867	0.00266848
252.4	-0.00353496	0.00089884	0.00264526
252.6	-0.00375041	0.00075607	0.00246431
252.8	-0.00388138	0.00075151	0.00295506
253	-0.00437429	0.00094715	0.00306792
253.2	-0.00415787	0.00149618	0.00339017
253.4	-0.00404182	0.0011616	0.0035939
253.6	-0.00450058	0.00082761	0.00343858
253.8	-0.0043127	0.00053333	0.00337901
254	-0.00482884	0.00031583	0.00306545
254.2	-0.00520317	0.00015018	0.00311077
254.4	-0.0054582	-0.00053627	0.00298197
254.6	-0.00513139	-0.00019957	0.00304877
254.8	-0.00549861	-0.00084305	0.00285352
255	-0.00516175	-0.00097555	0.00336053
255.2	-0.00489059	-0.00087065	0.00356802
255.4	-0.00432484	-0.00057757	0.0036939
255.6	-0.0043608	-0.00045453	0.00416141
255.8	-0.00478077	-0.00059406	0.00349389
256	-0.00543125	-0.00146619	0.00321968
256.2	-0.0057091	-0.00063432	0.00343892
256.4	-0.00637576	-0.00058924	0.00375357
256.6	-0.00623975	-0.00053233	0.00368291
256.8	-0.00639143	-6.719e-05	0.00406558
257	-0.00659791	0.00031586	0.00400483
257.2	-0.00595754	0.00043904	0.00416737
257.4	-0.00579801	0.00023018	0.00375548
257.6	-0.00614266	-5.067e-05	0.00369247
257.8	-0.00609351	-0.00036199	0.00349452
258	-0.00614203	-0.00048604	0.00328656
258.2	-0.00593795	-0.00087226	0.00325287
258.4	-0.00566043	-0.0009869	0.00321523
258.6	-0.0048356	-0.00079156	0.00349117
258.8	-0.00455406	-0.00064221	0.00413376
259	-0.00395084	-0.00045162	0.00433244
259.2	-0.00369049	-5.046e-05	0.00400774
259.4	-0.00374835	0.00011863	0.00358863
259.6	-0.0045127	-6.11e-05	0.00294436
259.8	-0.00485383	-0.00014229	0.00230582
260	-0.00523597	-0.00020518	0.00242422
260.2	-0.00524324	0.00031749	0.00278496
260.4	-0.00461819	0.00072046	0.00364306
260.6	-0.00459051	0.00042373	0.00320928
260.8	-0.00469005	0.00043615	0.00346573
261	-0.00465064	0.00028026	0.00325424
261.2	-0.00461621	-0.00026762	0.00312369
261.4	-0.00456921	-0.00053353	0.0030951
261.6	-0.00497555	-0.00089175	0.00301111
261.8	-0.004662	-0.00093835	0.00300032
262	-0.00444595	-0.0007666	0.00318059
262.2	-0.0043888	-0.00076386	0.00341408
262.4	-0.00452173	-0.00085343	0.00306822
262.6	-0.00435401	-0.0009236	0.00304885
262.8	-0.00432903	-0.00052398	0.00319571
263	-0.004378	-0.00013985	0.00286917
263.2	-0.00453264	9.248e-05	0.00295478
263.4	-0.00471543	0.00060683	0.00357952
263.6	-0.00490896	0.00013677	0.00313951
263.8	-0.00472129	5.088e-05	0.00327009
264	-0.00470037	9.646e-05	0.00361837
264.2	-0.00484414	0.00066961	0.00391079
264.4	-0.00432477	0.0006388	0.00408139
264.6	-0.00446996	0.000317	0.00367744
264.8	-0.00401893	0.00041627	0.00414272
265	-0.00399088	-0.00017124	0.0038515
265.2	-0.00394933	-0.00037825	0.0042454
265.4	-0.00377445	-0.00033641	0.00406892
265.6	-0.00432701	-0.00051974	0.00376659
265.8	-0.00435431	-0.00035447	0.00401812
266	-0.0047351	-0.00045262	0.00390012
266.2	-0.00502071	-0.00097954	0.00306472
266.4	-0.00517017	-0.0015592	0.00211095
266.6	-0.00550957	-0.00228111	0.00223006
266.8	-0.00574249	-0.00219481	0.00240965
267	-0.00557187	-0.00222028	0.00246015
267.2	-0.00562777	-0.00220111	0.00243244
267.4	-0.00561725	-0.00184287	0.00266738
267.6	-0.00588275	-0.00240084	0.00242477
267.8	-0.00618145	-0.00206854	0.00223808
268	-0.00626607	-0.0019148	0.00179292
268.2	-0.00635491	-0.00201888	0.00125897
268.4	-0.00619397	-0.00224448	0.00151902
268.6	-0.0061938	-0.00221286	0.00192441
268.8	-0.00615752	-0.00244975	0.00208409
269	-0.00617441	-0.00280343	0.00215067
269.2	-0.00647325	-0.00256812	0.00245035
269.4	-0.0062207	-0.00228808	0.00242042
269.6	-0.00661388	-0.00184653	0.0026574
269.8	-0.00661128	-0.00122745	0.0032192
270	-0.00636829	-0.00128149	0.00345003
270.2	-0.00625923	-0.00143028	0.00323665
270.4	-0.00635976	-0.00175621	0.00351816
270.6	-0.00638766	-0.00162263	0.00391622
270.8	-0.00601101	-0.0012223	0.00409465
271	-0.00545738	-0.00091563	0.0045606
271.2	-0.00501852	-0.00039457	0.00490197
271.4	-0.00484886	8.086e-05	0.00549692
271.6	-0.00479079	8.652e-05	0.00566846
271.8	-0.00473	0.00018692	0.00506104
272	-0.00434982	-0.00043023	0.00480165
272.2	-0.00429285	-0.0005798	0.0044425
272.4	-0.00459967	-0.00115985	0.00413233
272.6	-0.0045404	-0.00133116	0.00405324
272.8	-0.00449197	-0.00118136	0.00329548
273	-0.00477889	-0.00120273	0.00287827
273.2	-0.00489277	-0.00080735	0.00252273
273.4	-0.00491463	-0.00062991	0.00242101
273.6	-0.00543479	-0.00026644	0.00244486
273.8	-0.0057252	-0.0006173	0.00228056
274	-0.00584879	-0.00123499	0.00216679
274.2	-0.0059979	-0.00107181	0.00213432
274.4	-0.00572553	-0.00105369	0.0025127
274.6	-0.00589879	-0.00048128	0.00271722
274.8	-0.00610759	-0.00049117	0.00322579
275	-0.00614947	-0.00102158	0.0040103
275.2	-0.00565281	-0.00099601	0.00434197
275.4	-0.00567507	-0.00081135	0.00456864
275.6	-0.00559186	-0.00026999	0.00499722
275.8	-0.00579239	-0.00049298	0.00480324
276	-0.00528535	-0.00063165	0.00503565
276.2	-0.00544702	-0.00020533	0.00463683
276.4	-0.00563629	-0.00103901	0.00423104
276.6	-0.00534682	-0.00075719	0.00440158
276.8	-0.0051259	-0.00053665	0.00384826
277	-0.00479995	-0.00032629	0.00409065
277.2	-0.00479268	-0.00045072	0.00349423
277.4	-0.00482888	-0.00066508	0.00335379
277.6	-0.00479826	-0.00056163	0.00338233
277.8	-0.00505684	-0.00087444	0.00314716
278	-0.00462149	-0.00071942	0.00339976
278.2	-0.00444564	-0.00066292	0.00376082
278.4	-0.0045765	-0.00092468	0.00385959
278.6	-0.00512084	-0.00114613	0.00378456
278.8	-0.00505802	-0.00094011	0.00431895
279	-0.00540122	-0.00134692	0.0041391
279.2	-0.00534653	-0.0009887	0.00388888
279.4	-0.00549023	-0.00016328	0.00420018
279.6	-0.00561868	0.00025934	0.00465506
279.8	-0.00603279	-2.462e-05	0.00438499
280	-0.00540834	0.0004472	0.0049791
280.2	-0.00627128	0.00013761	0.00454432
280.4	-0.00653465	-0.00030251	0.00408716
280.6	-0.00642193	-3.724e-05	0.00431665
280.8	-0.00614917	-0.00017655	0.00391731
281	-0.0058801	-0.00019851	0.00444231
281.2	-0.00593931	-0.00042767	0.00386644
281.4	-0.00575033	-0.0005072	0.00377924
281.6	-0.00571461	-0.00093297	0.00388397
281.8	-0.00564232	-0.00147599	0.00335879
282	-0.00489321	-0.00153328	0.00382945
282.2	-0.00476479	-0.00207103	0.00410523
282.4	-0.00500358	-0.00219523	0.00326976
282.6	-0.0046239	-0.00189976	0.00332521
282.8	-0.00447753	-0.00131217	0.00370054
283	-0.00465777	-0.00131421	0.00335072
283.2	-0.00426443	-0.00135815	0.00333578
283.4	-0.00376576	-0.00069789	0.00402557
283.6	-0.00361737	-0.0007185	0.00419041
283.8	-0.00362055	-0.00053943	0.00465679
284	-0.00323339	-0.00046048	0.00496436
284.2	-0.0039348	-0.00066711	0.00496943
284.4	-0.00399153	-0.00057524	0.00479393
284.6	-0.00409156	-0.00045681	0.00501741
284.8	-0.00388578	-0.00033301	0.00497084
285	-0.00409076	5.5e-07	0.00561278
285.2	-0.00406141	-0.00041893	0.00533152
285.4	-0.00444441	-0.00065893	0.00511437
285.6	-0.00476464	-0.00098365	0.00494202
285.8	-0.00491163	-0.0014082	0.00461156
286	-0.00504834	-0.00118628	0.00509692
286.2	-0.00511079	-0.00141302	0.00485485
286.4	-0.00521256	-0.00131238	0.00421462
286.6	-0.00506935	-0.00110863	0.00452342
286.8	-0.00503342	-0.00094144	0.00473911
287	-0.00508269	-0.00093209	0.00451857
287.2	-0.00496658	-0.00141925	0.00399378
287.4	-0.00436609	-0.00128649	0.004378
287.6	-0.0043347	-0.00180368	0.00393764
287.8	-0.00419104	-0.00199702	0.00431342
288	-0.00419726	-0.00199186	0.00372594
288.2	-0.00487703	-0.00228259	0.00370477
288.4	-0.0052	-0.0023329	0.00318698
288.6	-0.00521231	-0.00212894	0.0027978
288.8	-0.00493409	-0.00211696	0.00302526
289	-0.00536265	-0.00206082	0.0033722
289.2	-0.00547955	-0.00229599	0.00319195
289.4	-0.00580954	-0.002266	0.00297398
289.6	-0.00580674	-0.00212146	0.00309064
289.8	-0.00592382	-0.00230085	0.0032176
290	-0.00552111	-0.00157322	0.00371972
290.2	-0.00560945	-0.00201996	0.00383404
290.4	-0.00609056	-0.00222287	0.00353079
290.6	-0.00663954	-0.00213476	0.0030396
290.8	-0.00646516	-0.00218932	0.00320201
291	-0.00646797	-0.00216188	0.00318336
291.2	-0.00604663	-0.00241587	0.00279781
291.4	-0.0055277	-0.00210007	0.00340398
291.6	-0.00560831	-0.00215999	0.0032239
291.8	-0.00529152	-0.00209158	0.00315699
292	-0.00512208	-0.00208199	0.0032245
292.2	-0.00493822	-0.00190988	0.0032908
292.4	-0.00479852	-0.00132874	0.00338281
292.6	-0.00458557	-0.00093265	0.00320914
292.8	-0.00479172	-0.0008913	0.00339078
293	-0.00506035	-0.00104564	0.00329251
293.2	-0.00510548	-0.00089908	0.00344135
293.4	-0.00486289	-0.00104459	0.00370494
293.6	-0.00467858	-0.0009755	0.004364
293.8	-0.00483393	-0.00107593	0.00448913
294	-0.00467626	-0.00095486	0.00458368
294.2	-0.00584999	-0.00253938	0.00386453
294.4	-0.00625577	-0.0025439	0.00371079
294.6	-0.00707067	-0.00338338	0.00285528
294.8	-0.00704414	-0.00378859	0.00312442
295	-0.00692326	-0.00325318	0.00337871
295.2	-0.00653017	-0.00311142	0.00362376
295.4	-0.00658878	-0.00272658	0.00395568
295.6	-0.00662127	-0.00248384	0.00388358
295.8	-0.00608431	-0.00213465	0.0036855
296	-0.00620926	-0.00174803	0.00409111
296.2	-0.00605055	-0.00109479	0.00381275
296.4	-0.00621967	-0.00064089	0.00395804
296.6	-0.00602972	-0.00086907	0.00355599
296.8	-0.00611632	-0.00097013	0.00353252
297	-0.00579111	-0.00087889	0.00395614
297.2	-0.00560154	-0.00061369	0.00448549
297.4	-0.00543315	-0.00125148	0.00472661
297.6	-0.00562017	-0.00161358	0.00447119
297.8	-0.00555285	-0.00186732	0.00369688
298	-0.00576729	-0.00262985	0.00301705
298.2	-0.00642201	-0.00361919	0.00283561
298.4	-0.00660339	-0.00361023	0.00295379
298.6	-0.0072428	-0.00420371	0.00209859
298.8	-0.0070571	-0.00418934	0.00188295
299	-0.00655817	-0.0033142	0.00235382
299.2	-0.00639778	-0.00329086	0.00243853
299.4	-0.00616105	-0.00276968	0.00269896
299.6	-0.00553298	-0.00194696	0.00303977
299.8	-0.00556917	-0.00150587	0.00298735
300	-0.00591155	-0.00151439	0.00322342
300.2	-0.00563206	-0.00082677	0.00336604
300.4	-0.00547719	-0.00084343	0.00330297
300.6	-0.00558044	-0.0006685	0.00340041
300.8	-0.00555443	-9.319e-05	0.00403853
301	-0.00575413	-0.00040326	0.00454584
301.2	-0.00580032	-0.00056182	0.00458349
301.4	-0.00597908	-0.00115276	0.00448906
301.6	-0.00624692	-0.00111463	0.00403454
301.8	-0.00608134	-0.00146848	0.00380492
302	-0.0065721	-0.00213794	0.00333729
302.2	-0.00708336	-0.00271521	0.00331212
302.4	-0.00698119	-0.00336553	0.00280621
302.6	-0.00727071	-0.00373655	0.00214789
302.8	-0.00687105	-0.00401654	0.00183581
303	-0.00643116	-0.00346523	0.00241278
303.2	-0.00623671	-0.00337669	0.00246234
303.4	-0.00568456	-0.00314973	0.00268389
303.6	-0.00588469	-0.00253214	0.00233259
303.8	-0.00641818	-0.00271973	0.00227816
304	-0.00616147	-0.00283509	0.0024272
304.2	-0.00586023	-0.00224693	0.00210982
304.4	-0.00586194	-0.00223712	0.00181075
304.6	-0.0057117	-0.00151404	0.00229294
304.8	-0.00557306	-0.00146591	0.00312941
305	-0.0055427	-0.00164023	0.00355327
305.2	-0.00491431	-0.00108899	0.00400713
305.4	-0.00468162	-0.00126589	0.00436686
305.6	-0.00517368	-0.00157158	0.00390705
305.8	-0.00529645	-0.00189332	0.00358983
306	-0.00531939	-0.00187373	0.00350217
306.2	-0.00499724	-0.00155154	0.00428925
306.4	-0.00486281	-0.00146683	0.00417637
306.6	-0.00480758	-0.00081957	0.00446711
306.8	-0.0040528	-0.00021595	0.00509054
307	-0.00390824	0.00013241	0.00551791
307.2	-0.00383325	0.00031045	0.00529536
307.4	-0.00385067	0.00063936	0.00534588
307.6	-0.00427973	0.00111354	0.00530525
307.8	-0.00441875	0.00050024	0.00527352
308	-0.00450218	0.00047061	0.00501369
308.2	-0.00457882	0.00080078	0.0044533
308.4	-0.0050765	0.00010811	0.00408921
308.6	-0.00516428	-0.00017553	0.00396684
308.8	-0.00515505	-0.00024884	0.00385947
309	-0.00497915	-0.00011674	0.00366678
309.2	-0.005157	-0.00063455	0.00331814
309.4	-0.00563081	-0.00116732	0.00268102
309.6	-0.00574526	-0.00181084	0.00217351
309.8	-0.00526118	-0.00176754	0.00262139
310	-0.0051559	-0.0018752	0.00278389
310.2	-0.00517081	-0.0019083	0.00294527
310.4	-0.00522738	-0.00242158	0.00248208
310.6	-0.00512846	-0.00258454	0.00267003
310.8	-0.0053808	-0.00285249	0.0027057
311	-0.00598675	-0.00304226	0.00260722
311.2	-0.00633958	-0.00293669	0.00253052
311.4	-0.00670334	-0.00236335	0.00317851
311.6	-0.00672463	-0.00228182	0.00319133
311.8	-0.00671508	-0.00220638	0.00333339
312	-0.0065803	-0.00198591	0.00348832
312.2	-0.00701877	-0.00189306	0.00298825
312.4	-0.00689977	-0.00202828	0.00259417
312.6	-0.00648581	-0.00117004	0.00267098
312.8	-0.00640517	-0.00082469	0.00282185
313	-0.006599	-0.0008987	0.00288632
313.2	-0.00661799	-0.00119592	0.00268875
313.4	-0.00611345	-0.00116996	0.00287985
313.6	-0.0057574	-0.0013605	0.00299373
313.8	-0.00573332	-0.00173441	0.00312118
314	-0.00596268	-0.00185137	0.00307099
314.2	-0.0057537	-0.00244389	0.00296699
314.4	-0.00597298	-0.00291195	0.00281839
314.6	-0.00670588	-0.00343046	0.00255543
314.8	-0.0074153	-0.00368667	0.00265457
315	-0.00740979	-0.00399183	0.00298019
315.2	-0.00726253	-0.00402358	0.00297988
315.4	-0.00755223	-0.00440408	0.00280004
315.6	-0.00714503	-0.0047803	0.00212978
315.8	-0.00722022	-0.00493754	0.00181323
316	-0.00736274	-0.00525683	0.00148304
316.2	-0.0073826	-0.0049538	0.00105826
316.4	-0.00655577	-0.00452072	0.00111832
316.6	-0.0063346	-0.00388501	0.00163071
316.8	-0.00639815	-0.00372163	0.00179523
317	-0.00650752	-0.00335313	0.00168976
317.2	-0.00623457	-0.00317231	0.00133445
317.4	-0.00601585	-0.00324579	0.00139678
317.6	-0.00607956	-0.00322212	0.0011559
317.8	-0.00612157	-0.00325738	0.00111089
318	-0.00574368	-0.00303801	0.00107616
318.2	-0.0057998	-0.00330643	0.0009528
318.4	-0.00573589	-0.00307467	0.00103554
318.6	-0.00591435	-0.00329221	0.00117609
318.8	-0.00566144	-0.00320775	0.00155165
319	-0.0057701	-0.00427015	0.00105998
319.2	-0.00570211	-0.00442301	0.00072599
319.4	-0.00627414	-0.00482057	-2.9e-05
319.6	-0.00613013	-0.00494625	-0.00022746
319.8	-0.00588507	-0.00502252	0.00023905
320	-0.00638859	-0.00524683	-0.00024725
320.2	-0.00639508	-0.00489981	-0.00026175
320.4	-0.00632967	-0.00436981	-5.05e-05
320.6	-0.00628421	-0.00428462	0.0005115
320.8	-0.00628297	-0.00376053	0.0008171
321	-0.00630766	-0.00358784	0.00089585
321.2	-0.00631587	-0.00426813	0.00090764
321.4	-0.00656197	-0.00419017	0.00108782
321.6	-0.00649316	-0.00388785	0.0012383
321.8	-0.00707289	-0.00382454	0.00135423
322	-0.0071649	-0.00371167	0.00128767
322.2	-0.0077043	-0.00371567	0.00138729
322.4	-0.00747227	-0.00343694	0.00151702
322.6	-0.0074797	-0.00341953	0.00177543
322.8	-0.00746083	-0.00334693	0.0018525
323	-0.00833381	-0.00447971	0.00127687
323.2	-0.00805384	-0.00358273	0.00172829
323.4	-0.00814456	-0.00350238	0.00173169
323.6	-0.0080068	-0.00343276	0.00164959
323.8	-0.00774662	-0.00388126	0.00155014
324	-0.00836301	-0.00409744	0.000615
324.2	-0.00823895	-0.00405647	0.00057345
324.4	-0.00771889	-0.0039024	0.00011821
324.6	-0.00754891	-0.00407211	-1.705e-05
324.8	-0.00718021	-0.0035508	-0.00011849
325	-0.0073438	-0.00378764	-0.0005503
325.2	-0.00725972	-0.00411931	-0.00063055
325.4	-0.00701253	-0.00336938	-0.00072621
325.6	-0.00695617	-0.00377399	-0.00076959
325.8	-0.00740419	-0.0040963	-0.00094658
326	-0.00723322	-0.00401418	-0.00120893
326.2	-0.00738503	-0.00424893	-0.00105699
326.4	-0.00721366	-0.00386211	-0.00067446
326.6	-0.00743381	-0.00383121	-0.00054812
326.8	-0.00760194	-0.00342396	-0.00023547
327	-0.00739656	-0.00339729	-0.00026469
327.2	-0.00691479	-0.00234941	0.00029619
327.4	-0.00674155	-0.00257182	0.00083288
327.6	-0.00685838	-0.00260275	0.00060546
327.8	-0.00625173	-0.00260674	0.00101015
328	-0.00660048	-0.00236685	0.00067316
328.2	-0.00651632	-0.00263622	0.00092415
328.4	-0.00618507	-0.00271207	0.00061268
328.6	-0.00615969	-0.0026323	0.00081019
328.8	-0.00634959	-0.00290947	0.00026078
329	-0.00687916	-0.0034095	0.0002121
329.2	-0.00660414	-0.00374188	0.00067196
329.4	-0.00653462	-0.00384707	0.00070802
329.6	-0.00661305	-0.00442276	0.00113756
329.8	-0.00703539	-0.00457579	0.00120106
330	-0.00701909	-0.00420007	0.00133025
330.2	-0.00757085	-0.00385884	0.00122599
330.4	-0.00779527	-0.00358771	0.00127651
330.6	-0.00772235	-0.00283314	0.00159632
330.8	-0.00767654	-0.00277458	0.00170657
331	-0.00810345	-0.00307102	0.00141583
331.2	-0.00852794	-0.00316908	0.00168355
331.4	-0.00813695	-0.00372234	0.00226854
331.6	-0.0077733	-0.00348435	0.00227753
331.8	-0.00764873	-0.00294685	0.00225013
332	-0.00792392	-0.00301347	0.00239172
332.2	-0.00739723	-0.00336475	0.00295893
332.4	-0.00709364	-0.00358156	0.00267606
332.6	-0.00701235	-0.00407074	0.00234498
332.8	-0.0071103	-0.00437148	0.00212303
333	-0.0072392	-0.00512472	0.00234947
333.2	-0.00679015	-0.00499614	0.00253273
333.4	-0.00691154	-0.00520866	0.00227876
333.6	-0.006704	-0.0047182	0.00220942
333.8	-0.00668519	-0.00474436	0.00209831
334	-0.0059963	-0.00402023	0.00235532
334.2	-0.00641063	-0.00414666	0.00193059
334.4	-0.00645205	-0.00406543	0.00226906
334.6	-0.00630752	-0.00376754	0.00222473
334.8	-0.00679184	-0.00420481	0.00157023
335	-0.00697939	-0.00430589	0.00120299
335.2	-0.00699138	-0.00449156	0.00108579
335.4	-0.00704388	-0.00477764	0.00088214
335.6	-0.00705277	-0.00441577	0.00032776
335.8	-0.00747889	-0.00431235	-1.622e-05
336	-0.00752192	-0.00436826	2.171e-05
336.2	-0.00730109	-0.00431078	-0.00042266
336.4	-0.00732803	-0.00421299	-0.0008098
336.6	-0.00735162	-0.00434054	-0.00138793
336.8	-0.0073624	-0.00420524	-0.00117669
337	-0.00771321	-0.00450663	-0.00101321
337.2	-0.00750994	-0.00406246	-0.0008972
337.4	-0.00746183	-0.00408964	-0.00108112
337.6	-0.00686887	-0.00342906	-0.00056309
337.8	-0.00698436	-0.0034179	-5.071e-05
338	-0.00698379	-0.00277612	0.0005789
338.2	-0.00755553	-0.00288261	0.00037163
338.4	-0.00718698	-0.00258623	0.00074749
338.6	-0.00683047	-0.00254302	0.00076038
338.8	-0.00699982	-0.00220787	0.00077466
339	-0.00695341	-0.00231228	0.00100043
339.2	-0.00732692	-0.00294947	0.00068836
339.4	-0.00768495	-0.00332305	0.00058588
339.6	-0.00748989	-0.00314913	0.00047133
339.8	-0.00790921	-0.00303706	0.0005331
340	-0.00819981	-0.00285964	0.00016276
340.2	-0.00831586	-0.00264154	-4.39e-05
340.4	-0.00875775	-0.00305901	3.534e-05
340.6	-0.0088955	-0.00305848	0.00023602
340.8	-0.00828589	-0.00334912	0.00039228
341	-0.00801991	-0.00311743	0.0008928
341.2	-0.00765874	-0.00339877	0.00057697
341.4	-0.00792185	-0.00353101	0.00034793
341.6	-0.00742534	-0.00318187	0.00087427
341.8	-0.0070426	-0.00259519	0.00122996
342	-0.00697473	-0.00293429	0.00149728
342.2	-0.00668402	-0.00274214	0.00164024
342.4	-0.00610185	-0.0028278	0.0018781
342.6	-0.00580922	-0.00268575	0.00213352
342.8	-0.00579213	-0.0030026	0.00203158
343	-0.00531652	-0.00301846	0.00242739
343.2	-0.00563944	-0.00333501	0.00229038
343.4	-0.00580766	-0.00331895	0.00242122
343.6	-0.00600423	-0.00319061	0.00204265
343.8	-0.00657401	-0.00351156	0.00172531
344	-0.00666562	-0.00357062	0.0016287
344.2	-0.00720626	-0.00384202	0.0012109
344.4	-0.00736602	-0.00430151	0.00103261
344.6	-0.00748997	-0.00442036	0.00075304
344.8	-0.00714891	-0.00473201	0.0001908
345	-0.00781252	-0.00464691	0.00011936
345.2	-0.00814881	-0.00499825	-0.00040983
345.4	-0.00854861	-0.00535804	-0.00055715
345.6	-0.0080986	-0.00554629	-5.842e-05
345.8	-0.00842155	-0.00557211	-0.00047687
346	-0.00913152	-0.00611575	-0.00070496
346.2	-0.00887415	-0.00511366	-0.00031403
346.4	-0.00847419	-0.004846	-0.00015301
346.6	-0.00816879	-0.00452631	3.556e-05
346.8	-0.00787759	-0.004584	0.00014365
347	-0.00774899	-0.00408705	0.00040565
347.2	-0.0074957	-0.00374672	0.00051014
347.4	-0.00735591	-0.00405441	0.0003879
347.6	-0.00722865	-0.00374007	0.00062653
347.8	-0.00710761	-0.00377041	0.00125503
348	-0.00628508	-0.00324375	0.00184923
348.2	-0.00637009	-0.00322346	0.00195184
348.4	-0.00630359	-0.00328252	0.00213125
348.6	-0.00653922	-0.00353128	0.00190184
348.8	-0.00623436	-0.00326553	0.00212644
349	-0.00602544	-0.00326348	0.0025094
349.2	-0.00578003	-0.00342051	0.00235137
349.4	-0.00599555	-0.0039544	0.00248343
349.6	-0.00587791	-0.00384752	0.00262467
349.8	-0.0062654	-0.00327049	0.00247045
350	-0.00625609	-0.00317963	0.00249593
350.2	-0.00584368	-0.00270994	0.00294107
350.4	-0.00576115	-0.00282688	0.00275066
350.6	-0.00595283	-0.00301968	0.00237592
350.8	-0.00619104	-0.00303581	0.00195926
351	-0.00652476	-0.0031013	0.00195806
351.2	-0.00660249	-0.00348186	0.00191087
351.4	-0.00704536	-0.00380059	0.00166355
351.6	-0.00676865	-0.00360224	0.00166295
351.8	-0.00687183	-0.00388193	0.00172894
352	-0.00678326	-0.00385185	0.0015273
352.2	-0.00749746	-0.00386805	0.0010996
352.4	-0.00811751	-0.00394786	0.000284
352.6	-0.00834237	-0.00416467	-0.00027136
352.8	-0.00837534	-0.00377446	-0.00034344
353	-0.00788541	-0.00360709	-0.00025678
353.2	-0.00829349	-0.00364555	-0.00071912
353.4	-0.00821771	-0.00361945	1.098e-05
353.6	-0.00793346	-0.0034318	0.00029044
353.8	-0.00821391	-0.00312176	0.00045112
354	-0.00813667	-0.00308523	0.00077674
354.2	-0.00770259	-0.00282409	0.00200861
354.4	-0.00757634	-0.00250744	0.00161356
354.6	-0.00732457	-0.002339	0.00219143
354.8	-0.00728086	-0.00258243	0.0019152
355	-0.00754697	-0.00293623	0.00188371
355.2	-0.00768044	-0.00330287	0.0015606
355.4	-0.00706991	-0.00266883	0.00172161
355.6	-0.00719296	-0.00340833	0.00172444
355.8	-0.00743915	-0.0033367	0.0019995
356	-0.00777147	-0.00341771	0.00151062
356.2	-0.00793258	-0.00389858	0.00131175
356.4	-0.00821617	-0.00427489	0.0013973
356.6	-0.0081791	-0.00456973	0.00147408
356.8	-0.00776528	-0.00431729	0.00171535
357	-0.00737638	-0.00411493	0.00188604
357.2	-0.00752728	-0.00415981	0.00178974
357.4	-0.00714146	-0.003951	0.00244934
357.6	-0.00694495	-0.00371962	0.00270113
357.8	-0.00702972	-0.00386398	0.00268809
358	-0.00648941	-0.00342597	0.00377564
358.2	-0.00575524	-0.00312192	0.00469196
358.4	-0.00599448	-0.00341729	0.00349553
358.6	-0.00615378	-0.0034679	0.0031067
358.8	-0.00600399	-0.00332789	0.00245282
359	-0.00684677	-0.00385425	0.00207227
359.2	-0.00678778	-0.00368201	0.00202502
359.4	-0.00653282	-0.00318033	0.00241254
359.6	-0.00696323	-0.00369267	0.00227589
359.8	-0.00720316	-0.00356243	0.00219215
360	-0.00751633	-0.00387293	0.00198871
360.2	-0.00749468	-0.0039303	0.00216574
360.4	-0.00754365	-0.0034875	0.0024191
360.6	-0.00711758	-0.00284101	0.00238203
360.8	-0.00709163	-0.00281408	0.00216478
361	-0.00775342	-0.00278967	0.00210625
361.2	-0.00805257	-0.00300069	0.00168211
361.4	-0.00809003	-0.00369587	0.00169977
361.6	-0.00780283	-0.00376697	0.00163515
361.8	-0.00775308	-0.00445981	0.00148458
362	-0.00760839	-0.00405898	0.00212893
362.2	-0.0079798	-0.00449701	0.00160557
362.4	-0.00858924	-0.00511559	0.00052775
362.6	-0.00843737	-0.00498103	0.00102139
362.8	-0.00900682	-0.00541109	0.001286
363	-0.00964081	-0.005791	0.0012236
363.2	-0.00953709	-0.00565172	0.00125539
363.4	-0.00988759	-0.00554093	0.00153667
363.6	-0.010231	-0.00576324	0.00138658
363.8	-0.0104829	-0.00555689	0.00173344
364	-0.010504	-0.004855	0.00199454
364.2	-0.0102273	-0.00445439	0.00233392
364.4	-0.00995898	-0.00419605	0.00248662
364.6	-0.00970667	-0.00398962	0.00250051
364.8	-0.0102159	-0.00407243	0.00202727
365	-0.0101402	-0.0034014	0.00238849
365.2	-0.00936551	-0.00293145	0.0022309
365.4	-0.0090406	-0.00317616	0.00214949
365.6	-0.00825226	-0.00243366	0.00209777
365.8	-0.0076397	-0.00222194	0.00228985
366	-0.00729681	-0.00179707	0.00226867
366.2	-0.00723776	-0.00192131	0.00214017
366.4	-0.00684834	-0.00202878	0.00236717
366.6	-0.00680475	-0.00231512	0.00244155
366.8	-0.00726504	-0.00290041	0.0017097
367	-0.0068193	-0.00300744	0.00144001
367.2	-0.00706763	-0.00334777	0.00121385
367.4	-0.00742858	-0.00312601	0.00139599
367.6	-0.00805177	-0.00342017	0.00093432
367.8	-0.00793906	-0.00308071	0.00146323
368	-0.00788308	-0.00316019	0.00141422
368.2	-0.00809556	-0.00381426	0.00140813
368.4	-0.00863441	-0.00435416	0.00088166
368.6	-0.00924111	-0.00475218	0.0006645
368.8	-0.00990022	-0.00457891	0.00088503
369	-0.0096704	-0.00413401	0.00132049
369.2	-0.00941959	-0.00408047	0.00146161
369.4	-0.00977106	-0.00445907	0.00159058
369.6	-0.00926803	-0.00420058	0.00168767
369.8	-0.0090738	-0.00393506	0.00187994
370	-0.00843806	-0.00392743	0.00211921
370.2	-0.00879058	-0.00393441	0.0022019
370.4	-0.00820109	-0.00349502	0.00227143
370.6	-0.00799407	-0.00389658	0.00203679
370.8	-0.00730453	-0.00334931	0.00236415
371	-0.0069083	-0.00257396	0.00293207
371.2	-0.00727393	-0.00208879	0.00311648
371.4	-0.00743032	-0.00214483	0.00326844
371.6	-0.0079582	-0.00210373	0.00273633
371.8	-0.00745468	-0.00142914	0.00336024
372	-0.00764059	-0.00180546	0.0028771
372.2	-0.00806981	-0.00210427	0.00272934
372.4	-0.00860594	-0.00220493	0.00236831
372.6	-0.00893812	-0.00221812	0.00248422
372.8	-0.00892178	-0.00185481	0.00309037
373	-0.00895296	-0.00214592	0.00267722
373.2	-0.00876923	-0.00224754	0.00306237
373.4	-0.00915451	-0.00294787	0.00284901
373.6	-0.00923167	-0.00338303	0.00230594
373.8	-0.00914827	-0.00374034	0.0024227
374	-0.00846204	-0.00412552	0.00243702
374.2	-0.00808381	-0.00379073	0.00283459
374.4	-0.00736114	-0.00387376	0.00260949
374.6	-0.00685064	-0.00389374	0.00285594
374.8	-0.00656908	-0.00357195	0.00334741
375	-0.0067086	-0.00383076	0.00356451
375.2	-0.00693091	-0.00422443	0.00359279
375.4	-0.00701671	-0.00459094	0.00380945
375.6	-0.00707039	-0.00416946	0.00356739
375.8	-0.00657172	-0.00409981	0.00374267
376	-0.00641254	-0.0040525	0.00332033
376.2	-0.00576588	-0.00340058	0.00390834
376.4	-0.00616049	-0.00321153	0.00385161
376.6	-0.00602558	-0.00279371	0.00411499
376.8	-0.00582506	-0.00234306	0.00435034
377	-0.0060833	-0.00240008	0.00399128
377.2	-0.00577752	-0.00195594	0.00440893
377.4	-0.00616097	-0.00245127	0.0040662
377.6	-0.00632449	-0.00226293	0.00377709
377.8	-0.00613105	-0.00242875	0.00377197
378	-0.00603181	-0.00199894	0.0039376
378.2	-0.00627199	-0.00216185	0.00412638
378.4	-0.00706331	-0.00231671	0.00343284
378.6	-0.00734513	-0.00217027	0.00355452
378.8	-0.00811231	-0.00288209	0.00324873
379	-0.00840804	-0.00282923	0.00317574
379.2	-0.00839182	-0.00288007	0.00286587
379.4	-0.00869933	-0.00326554	0.00271892
379.6	-0.00852122	-0.00324879	0.00249106
379.8	-0.00865451	-0.0035852	0.00234954
380	-0.00857536	-0.00327833	0.00238495
380.2	-0.00813223	-0.00287808	0.00289749
380.4	-0.00833597	-0.00301177	0.00279161
380.6	-0.00817567	-0.00282193	0.00271805
380.8	-0.00823825	-0.00280444	0.00266029
381	-0.00837215	-0.00307949	0.00269304
381.2	-0.00833223	-0.00310073	0.00282469
381.4	-0.00813653	-0.00363109	0.00269129
381.6	-0.00820056	-0.00373151	0.00267806
381.8	-0.00803734	-0.00417656	0.00265999
382	-0.00838197	-0.00431461	0.00294512
382.2	-0.00852015	-0.00475835	0.00325816
382.4	-0.00844433	-0.00446563	0.00368409
382.6	-0.00810502	-0.00424343	0.00442495
382.8	-0.00815596	-0.00443045	0.00440211
383	-0.00772056	-0.00424274	0.00396894
383.2	-0.00734286	-0.00414394	0.00390011
383.4	-0.00769993	-0.00445287	0.00364338
383.6	-0.00731685	-0.00369489	0.00319203
383.8	-0.00741372	-0.00353504	0.00339391
384	-0.00725043	-0.00358263	0.00313679
384.2	-0.0073444	-0.00357222	0.00261123
384.4	-0.00734635	-0.0036307	0.00204326
384.6	-0.0074887	-0.00327542	0.00160729
384.8	-0.00761087	-0.00339709	0.00103488
385	-0.00798214	-0.00355934	0.00050257
385.2	-0.00804187	-0.00370287	0.0003979
385.4	-0.00826309	-0.00420535	-0.00013658
385.6	-0.00856449	-0.00460837	-0.00029495
385.8	-0.00864813	-0.00469186	-0.00024255
386	-0.00841834	-0.0044731	0.00072913
386.2	-0.00771505	-0.00413966	0.00177736
386.4	-0.00755905	-0.00398903	0.00241698
386.6	-0.00711186	-0.00409239	0.0028161
386.8	-0.00770363	-0.00527015	0.00216636
387	-0.0076633	-0.00498497	0.00215001
387.2	-0.00733356	-0.00468844	0.00297182
387.4	-0.00756495	-0.00474313	0.00301152
387.6	-0.00720927	-0.00410175	0.00356326
387.8	-0.00764278	-0.00422871	0.00393856
388	-0.00792499	-0.00467773	0.00374884
388.2	-0.00838537	-0.00485138	0.00355183
388.4	-0.00798148	-0.00436728	0.00350929
388.6	-0.00789376	-0.00402995	0.00338995
388.8	-0.00822966	-0.00406864	0.00303124
389	-0.0086418	-0.00437135	0.0026706
389.2	-0.00851988	-0.00416414	0.00266102
389.4	-0.00866319	-0.00386021	0.00267901
389.6	-0.00819075	-0.00333732	0.00320912
389.8	-0.00792045	-0.00257499	0.0037823
390	-0.00752429	-0.00237053	0.00397253
390.2	-0.00759461	-0.00231222	0.00393006
390.4	-0.00776107	-0.002765	0.00329966
390.6	-0.00764896	-0.00329733	0.00246822
390.8	-0.00784751	-0.00374696	0.00192366
391	-0.00715588	-0.00320687	0.00230333
391.2	-0.00658739	-0.0027014	0.00286129
391.4	-0.00699951	-0.00249588	0.00242419
391.6	-0.00751657	-0.00267252	0.002145
391.8	-0.00812246	-0.00306063	0.00199265
392	-0.0083935	-0.00362393	0.00227718
392.2	-0.00865657	-0.00376244	0.00203673
392.4	-0.00812909	-0.00346441	0.00219551
392.6	-0.00841688	-0.00335558	0.00259607
392.8	-0.00880191	-0.0030786	0.00287284
393	-0.00853394	-0.00298656	0.00315311
393.2	-0.00800193	-0.00256932	0.00383466
393.4	-0.00777009	-0.00279881	0.00444196
393.6	-0.00767251	-0.00306796	0.00453608
393.8	-0.00748927	-0.00310824	0.00455128
394	-0.00738159	-0.0037639	0.00381085
394.2	-0.0070005	-0.00369655	0.00386825
394.4	-0.00634546	-0.00365856	0.00352239
394.6	-0.00612905	-0.00368146	0.00303607
394.8	-0.00587521	-0.00383905	0.00306575
395	-0.00565811	-0.00341661	0.00345847
395.2	-0.00621028	-0.00327038	0.00318217
395.4	-0.00687739	-0.00408474	0.00249428
395.6	-0.00723152	-0.0046007	0.00236513
395.8	-0.00697948	-0.00501656	0.00249996
396	-0.00706048	-0.00518852	0.00234189
396.2	-0.00720826	-0.00526579	0.0020934
396.4	-0.00725601	-0.00525642	0.00187067
396.6	-0.00803639	-0.0054317	0.00174703
396.8	-0.00821651	-0.00512314	0.00166023
397	-0.00784367	-0.00532372	0.00206519
397.2	-0.0084248	-0.00590703	0.00161548
397.4	-0.00899997	-0.00569838	0.00174577
397.6	-0.00893091	-0.00524544	0.001683
397.8	-0.00891231	-0.00452457	0.00166485
398	-0.00872282	-0.00433086	0.00158549
398.2	-0.00854986	-0.00360726	0.00209368
398.4	-0.00866274	-0.00339608	0.00196625
398.6	-0.00904116	-0.0033666	0.00167148
398.8	-0.00907591	-0.00308557	0.00156862
399	-0.00946487	-0.00301777	0.00148968
399.2	-0.00989292	-0.00352202	0.00150541
399.4	-0.00970468	-0.00436715	0.00138808
399.6	-0.00892952	-0.00392974	0.00207249
399.8	-0.008892	-0.00465868	0.00157977
400	-0.00844144	-0.00454663	0.00173858
400.2	-0.00772868	-0.00470757	0.00205166
400.4	-0.00773723	-0.00509236	0.00210907
400.6	-0.00826926	-0.00531301	0.00232825
400.8	-0.00845756	-0.00515653	0.00259295
401	-0.00859306	-0.00529372	0.00277719
401.2	-0.00895758	-0.00520537	0.00254396
401.4	-0.00871001	-0.00486628	0.00315769
401.6	-0.00843814	-0.00512897	0.00273057
401.8	-0.00860509	-0.00496994	0.00251742
402	-0.00822039	-0.00490296	0.00250701
402.2	-0.00862623	-0.00486529	0.00256139
402.4	-0.00864203	-0.00472861	0.00240629
402.6	-0.00888898	-0.00474053	0.00230596
402.8	-0.0088514	-0.00495347	0.00184126
403	-0.00922745	-0.00513103	0.00185646
403.2	-0.00927738	-0.00512221	0.0021962
403.4	-0.00897733	-0.00549046	0.00172595
403.6	-0.0085339	-0.00520444	0.00203674
403.8	-0.00867471	-0.0056777	0.00101648
404	-0.00827853	-0.00546562	0.00094823
404.2	-0.00802598	-0.00570973	0.00106055
404.4	-0.00861267	-0.00592266	0.00080376
404.6	-0.0090637	-0.00569221	0.00108846
404.8	-0.00852805	-0.00570281	0.00164818
405	-0.00809266	-0.00546948	0.00187928
405.2	-0.00769198	-0.0056991	0.00215175
405.4	-0.00761225	-0.00560429	0.00237203
405.6	-0.00790273	-0.00527042	0.00195869
405.8	-0.00830737	-0.00509935	0.00199659
406	-0.00829064	-0.00470317	0.00228097
406.2	-0.00911964	-0.00404092	0.00203152
406.4	-0.00883361	-0.00383359	0.00183499
406.6	-0.0094412	-0.00417585	0.00117508
406.8	-0.00895082	-0.00396738	0.00107601
407	-0.00919095	-0.00377859	0.00092499
407.2	-0.00944433	-0.00424052	0.00042172
407.4	-0.00970531	-0.00502825	-0.00024302
407.6	-0.00981556	-0.00540126	-0.0004625
407.8	-0.00960465	-0.0054458	-0.00064806
408	-0.00962154	-0.00543522	-0.00052343
408.2	-0.00947458	-0.00548791	0.00015293
408.4	-0.00952916	-0.00558624	0.00073408
408.6	-0.00917013	-0.0058262	0.00181141
408.8	-0.00829014	-0.00595052	0.00262247
409	-0.00811638	-0.00599236	0.00296011
409.2	-0.00827107	-0.00623178	0.0026851
409.4	-0.00872282	-0.00578724	0.00271891
409.6	-0.00900291	-0.00579855	0.00263191
409.8	-0.00949427	-0.00579462	0.00295757
410	-0.00894406	-0.00484736	0.00348054
410.2	-0.00942522	-0.00446391	0.00336703
410.4	-0.00912824	-0.00473629	0.00298495
410.6	-0.00922054	-0.00500155	0.00226736
410.8	-0.00907431	-0.00522618	0.00217109
411	-0.00975611	-0.00576096	0.00127971
411.2	-0.00980955	-0.0060199	0.00088774
411.4	-0.00984669	-0.00602057	0.00052345
411.6	-0.0096195	-0.00539154	0.00067692
411.8	-0.0091922	-0.0050444	0.00051263
412	-0.00964931	-0.00485028	0.00023447
412.2	-0.0098033	-0.0049685	0.00028406
412.4	-0.00970576	-0.00505054	9.555e-05
412.6	-0.00899512	-0.00493371	7.705e-05
412.8	-0.00883964	-0.00464242	0.00016982
413	-0.00911624	-0.00478192	-6.456e-05
413.2	-0.00952216	-0.0051966	-0.00038365
413.4	-0.00928191	-0.00496336	0.00042154
413.6	-0.00905634	-0.00524784	0.00081614
413.8	-0.00877019	-0.00471097	0.0013408
414	-0.00852728	-0.00453833	0.00162585
414.2	-0.00873194	-0.0043161	0.00185505
414.4	-0.00895349	-0.00494755	0.00135755
414.6	-0.00928518	-0.00551547	0.00075935
414.8	-0.00961084	-0.00569608	0.00078944
415	-0.00978142	-0.00577479	0.00086083
415.2	-0.00943296	-0.00551315	0.00126321
415.4	-0.00942435	-0.00555744	0.00104305
415.6	-0.00967851	-0.00576803	0.00104601
415.8	-0.00984874	-0.00627842	0.00049062
416	-0.0104893	-0.00666823	-9.929e-05
416.2	-0.0104102	-0.00679421	-0.00062045
416.4	-0.00984397	-0.0064278	-0.00067286
416.6	-0.00943227	-0.00635659	-0.0009858
416.8	-0.00967373	-0.00623482	-0.00077559
417	-0.00964625	-0.006778	-0.00044612
417.2	-0.00971584	-0.00688672	-0.00037906
417.4	-0.00942736	-0.00641933	3.5e-06
417.6	-0.00944855	-0.0064757	0.00012658
417.8	-0.00946965	-0.00570247	0.00033767
418	-0.00947653	-0.00581215	0.00068322
418.2	-0.00898968	-0.00519155	0.00108338
418.4	-0.00947532	-0.00547387	0.00056215
418.6	-0.00902562	-0.0052861	0.00074413
418.8	-0.00863963	-0.00515622	0.00119397
419	-0.00888916	-0.00543317	0.00144179
419.2	-0.00844991	-0.00529235	0.00141787
419.4	-0.00863825	-0.00514463	0.00112102
419.6	-0.0089028	-0.00586348	0.00103903
419.8	-0.00920786	-0.00616732	0.00070204
420	-0.00939606	-0.00621735	0.0004354
420.2	-0.00905114	-0.00602479	0.00047691
420.4	-0.00871876	-0.00575832	0.00030827
420.6	-0.00894265	-0.00578801	0.00026939
420.8	-0.00894532	-0.00552775	0.00085066
421	-0.00926419	-0.00559309	0.00135313
421.2	-0.00976057	-0.00493135	0.00131794
421.4	-0.00979355	-0.00508818	0.00114266
421.6	-0.0100217	-0.00504291	0.00101768
421.8	-0.010031	-0.00479966	0.00100371
422	-0.00955826	-0.00497165	0.0011003
422.2	-0.00965848	-0.00468515	0.00062745
422.4	-0.00963116	-0.00495493	0.00036048
422.6	-0.00914974	-0.00476759	0.00057072
422.8	-0.00923328	-0.00453431	0.00022364
423	-0.0095539	-0.00508719	0.00030025
423.2	-0.00885944	-0.00473059	0.00030792
423.4	-0.00892369	-0.00491125	0.00039387
423.6	-0.00898639	-0.00553137	0.00032098
423.8	-0.00873842	-0.0052597	0.00036262
424	-0.0084602	-0.00535419	0.00031148
424.2	-0.00825186	-0.00564553	0.00031404
424.4	-0.00836198	-0.00602671	-4.8e-07
424.6	-0.00886794	-0.00598498	0.00060201
424.8	-0.00921782	-0.00586897	0.00038555
425	-0.00947094	-0.00563705	0.00067497
425.2	-0.0093076	-0.00546581	0.00052762
425.4	-0.00942028	-0.00559988	-0.00027192
425.6	-0.00946821	-0.00557081	-2.904e-05
425.8	-0.00910211	-0.00537341	0.00016496
426	-0.00896055	-0.0055969	-4.227e-05
426.2	-0.00925614	-0.00563932	-0.00027256
426.4	-0.00933995	-0.00576334	-0.00029608
426.6	-0.00956482	-0.0056241	-0.00049791
426.8	-0.00969796	-0.00570452	-0.00088079
427	-0.00987647	-0.00663429	-0.00096176
427.2	-0.00988283	-0.00670589	-0.00132667
427.4	-0.0102458	-0.00689513	-0.00123568
427.6	-0.0107357	-0.00718597	-0.00159935
427.8	-0.0107418	-0.00724314	-0.00157346
428	-0.0109925	-0.007643	-0.00139782
428.2	-0.0111885	-0.00819654	-0.0013032
428.4	-0.0117767	-0.00838925	-0.00171407
428.6	-0.0122617	-0.00848203	-0.0018186
428.8	-0.0114979	-0.00812824	-0.00122834
429	-0.0111503	-0.00707781	-0.00042772
429.2	-0.0107843	-0.00672908	-0.00018738
429.4	-0.0106505	-0.00605299	0.00010994
429.6	-0.0101799	-0.00556154	0.0011963
429.8	-0.00943181	-0.00480856	0.00140745
430	-0.00904841	-0.00467493	0.00178128
430.2	-0.00896199	-0.00441003	0.00179081
430.4	-0.00850666	-0.00457453	0.00150558
430.6	-0.00842138	-0.00456308	0.00129452
430.8	-0.008533	-0.00491306	0.00085723
431	-0.00845499	-0.00586324	0.0007079
431.2	-0.00859694	-0.00616102	0.00018153
431.4	-0.00859825	-0.00583339	0.00071838
431.6	-0.00923691	-0.00648877	0.00039913
431.8	-0.00935562	-0.0066433	0.00025352
432	-0.00934443	-0.00639778	0.00059001
432.2	-0.0096602	-0.00685814	0.00033304
432.4	-0.01	-0.00651829	0.00043455
432.6	-0.0101162	-0.00629747	0.0006184
432.8	-0.0102991	-0.00577961	0.00101104
433	-0.0109556	-0.00540808	0.00109947
433.2	-0.0108065	-0.00546062	0.00153728
433.4	-0.0109575	-0.00507543	0.00178226
433.6	-0.0108705	-0.0043913	0.00222728
433.8	-0.0109425	-0.00450986	0.00223668
434	-0.0105924	-0.00505204	0.00203265
434.2	-0.0107822	-0.00546532	0.00132843
434.4	-0.0105486	-0.00540917	0.00164009
434.6	-0.0108973	-0.00563939	0.00184069
434.8	-0.011057	-0.00640627	0.00146285
435	-0.0110584	-0.00646498	0.00132871
435.2	-0.0109045	-0.00615191	0.00143833
435.4	-0.0111744	-0.00651931	0.00179714
435.6	-0.0116761	-0.00700464	0.00160822
435.8	-0.0110939	-0.00658343	0.00169877
436	-0.0113235	-0.00651903	0.00166532
436.2	-0.0113316	-0.00689626	0.00142857
436.4	-0.0115025	-0.0065307	0.00123062
436.6	-0.0120101	-0.00699869	0.00080719
436.8	-0.0121157	-0.00754182	0.00041605
437	-0.0113575	-0.00761126	0.00042261
437.2	-0.0108383	-0.00755981	0.00086215
437.4	-0.0108217	-0.00723695	0.00119882
437.6	-0.0104402	-0.00696499	0.00192153
437.8	-0.0101484	-0.00740621	0.00176959
438	-0.00894816	-0.00715481	0.0019306
438.2	-0.00847137	-0.00693205	0.00243035
438.4	-0.00796007	-0.00666318	0.00290095
438.6	-0.00808883	-0.00679282	0.00281745
438.8	-0.00829893	-0.00714173	0.00255707
439	-0.00845548	-0.00700051	0.00225254
439.2	-0.00830927	-0.00666833	0.00261367
439.4	-0.00903528	-0.00720843	0.00188055
439.6	-0.00910167	-0.00648121	0.00207478
439.8	-0.00881807	-0.00630589	0.00176494
440	-0.00986849	-0.00682879	0.00090442
440.2	-0.0100155	-0.00716809	0.00040507
440.4	-0.0105967	-0.00703261	-0.00023071
440.6	-0.0109856	-0.00746571	-0.00049867
440.8	-0.0111104	-0.00752739	-0.0007822
441	-0.0113684	-0.0076388	-0.00159277
441.2	-0.0119607	-0.00784318	-0.0013643
441.4	-0.0123116	-0.00788038	-0.00115337
441.6	-0.0117917	-0.00782765	-0.00058853
441.8	-0.0113423	-0.00773234	-0.00063807
442	-0.01062	-0.00773701	5.765e-05
442.2	-0.0102418	-0.0075434	0.0001044
442.4	-0.010077	-0.00739428	0.00071807
442.6	-0.0101244	-0.00736412	0.00102724
442.8	-0.0103075	-0.00776767	0.00133584
443	-0.01004	-0.00803437	0.00120915
443.2	-0.00980766	-0.00764776	0.00184592
443.4	-0.00935647	-0.00755746	0.00172679
443.6	-0.00876868	-0.00699558	0.00235249
443.8	-0.00798517	-0.00724403	0.00262362
444	-0.00806634	-0.0071219	0.00260166
444.2	-0.00805051	-0.00702352	0.00227682
444.4	-0.00827612	-0.00651588	0.00198878
444.6	-0.0085793	-0.00655107	0.00197917
444.8	-0.00866969	-0.00658696	0.00155891
445	-0.00877678	-0.00585576	0.00128236
445.2	-0.00886091	-0.00538557	0.00189943
445.4	-0.0086959	-0.00486418	0.00219927
445.6	-0.00835727	-0.00425342	0.00229787
445.8	-0.00825712	-0.00399807	0.00201068
446	-0.0079952	-0.00347551	0.00212931
446.2	-0.0077144	-0.00238977	0.0022775
446.4	-0.0083731	-0.00280582	0.00242414
446.6	-0.00876014	-0.0033063	0.00212591
446.8	-0.00893194	-0.00354319	0.002163
447	-0.0082634	-0.0036299	0.00221249
447.2	-0.00808095	-0.00328872	0.00224961
447.4	-0.00807358	-0.00363209	0.00174006
447.6	-0.00825961	-0.00436918	0.00186617
447.8	-0.00811358	-0.0046292	0.00175412
448	-0.00850318	-0.00441692	0.00154261
448.2	-0.00885339	-0.00475544	0.00115782
448.4	-0.00906052	-0.00552302	0.00079826
448.6	-0.00906549	-0.00607659	0.00078977
448.8	-0.00877027	-0.00587078	0.00089807
449	-0.00899017	-0.00510062	0.00148365
449.2	-0.00939478	-0.00569269	0.00102972
449.4	-0.00948846	-0.0057624	0.00105865
449.6	-0.00941872	-0.00612531	0.00080104
449.8	-0.00962201	-0.00593009	0.00109257
450	-0.0102764	-0.00591946	0.00098162
450.2	-0.0106706	-0.00575191	0.00130707
450.4	-0.0112741	-0.00679358	0.00124888
450.6	-0.0106077	-0.00675424	0.00090198
450.8	-0.0102336	-0.00635494	0.00120907
451	-0.0100132	-0.00625213	0.000781
451.2	-0.009983	-0.00587268	0.00069587
451.4	-0.0103512	-0.00591285	0.00074912
451.6	-0.010146	-0.00574805	0.00045511
451.8	-0.00990548	-0.00528896	0.0001187
452	-0.00966648	-0.00493183	0.00027355
452.2	-0.00896323	-0.00536235	0.00027051
452.4	-0.00875644	-0.00539182	-0.0001521
452.6	-0.00860679	-0.00488406	0.0002428
452.8	-0.00863011	-0.00475828	0.00040852
453	-0.00869722	-0.00413334	0.00074979
453.2	-0.00875871	-0.00414931	0.00085061
453.4	-0.00854384	-0.00358685	0.0013104
453.6	-0.00900848	-0.00390824	0.00127934
453.8	-0.00996857	-0.00374896	0.00124763
454	-0.0102916	-0.00397	0.00141734
454.2	-0.00997931	-0.00384704	0.00209358
454.4	-0.0100459	-0.00410844	0.00227689
454.6	-0.0101043	-0.00389331	0.00226595
454.8	-0.0106631	-0.00413132	0.00253737
455	-0.0113645	-0.00450524	0.00210792
455.2	-0.0114964	-0.00453758	0.00240852
455.4	-0.0117747	-0.00468543	0.00222717
455.6	-0.0115471	-0.00519867	0.001901
455.8	-0.0116286	-0.00557412	0.00214757
456	-0.0114539	-0.00589549	0.00210792
456.2	-0.0111838	-0.00677274	0.00246618
456.4	-0.0114424	-0.00687502	0.0020332
456.6	-0.0112409	-0.00749453	0.00201623
456.8	-0.0106827	-0.00766743	0.0017467
457	-0.0103444	-0.00705239	0.00153045
457.2	-0.0100074	-0.00733896	0.00126826
457.4	-0.00996664	-0.00703764	0.00111662
457.6	-0.0103823	-0.0069454	0.00109491
457.8	-0.0101234	-0.00670919	0.00078663
458	-0.00991229	-0.00642657	0.00123039
458.2	-0.00990489	-0.0063455	0.00090022
458.4	-0.00977035	-0.00612197	0.00096501
458.6	-0.00960565	-0.00604634	0.00082407
458.8	-0.0100873	-0.00650992	0.00034395
459	-0.0101088	-0.00660829	0.00035984
459.2	-0.00994339	-0.00616145	0.0006101
459.4	-0.00978863	-0.00603896	0.0009193
459.6	-0.0101129	-0.00665144	0.00143635
459.8	-0.0105477	-0.00613856	0.00162309
460	-0.0110551	-0.00644883	0.00140356
460.2	-0.0112181	-0.00701575	0.00176591
460.4	-0.0111358	-0.00674845	0.00132758
460.6	-0.0108965	-0.0071897	0.00140551
460.8	-0.0107267	-0.00675485	0.00116413
461	-0.0104552	-0.00699764	0.00128596
461.2	-0.0108835	-0.00715298	0.00132654
461.4	-0.0108913	-0.00655674	0.0014016
461.6	-0.0106753	-0.00654943	0.0014668
461.8	-0.0105287	-0.00681208	0.00114871
462	-0.0104786	-0.00689255	0.00084245
462.2	-0.0099073	-0.00667468	0.00085525
462.4	-0.00965544	-0.0071467	0.00092668
462.6	-0.00980167	-0.00723564	0.00097631
462.8	-0.00994852	-0.00758477	0.00083954
463	-0.00944148	-0.00725395	0.0012072
463.2	-0.00910683	-0.00686788	0.00147268
463.4	-0.00934211	-0.00692686	0.00152581
463.6	-0.00944522	-0.00633603	0.00217136
463.8	-0.00937153	-0.00555897	0.00232705
464	-0.010054	-0.00625283	0.0016875
464.2	-0.0105398	-0.00629803	0.00135956
464.4	-0.0106395	-0.005944	0.00117005
464.6	-0.0107827	-0.0064295	0.00115747
464.8	-0.0103769	-0.00549027	0.00134722
465	-0.0107671	-0.00532784	0.00168914
465.2	-0.0113266	-0.0050615	0.00161044
465.4	-0.0108664	-0.00508315	0.00127256
465.6	-0.01083	-0.00571756	0.00164193
465.8	-0.0109975	-0.00630423	0.00107118
466	-0.0110298	-0.00675774	0.00056883
466.2	-0.0108447	-0.00710631	0.00079813
466.4	-0.0111578	-0.00811597	0.00076553
466.6	-0.0111721	-0.00778588	0.00095242
466.8	-0.010545	-0.00796669	0.00120144
467	-0.0100633	-0.00796229	0.00161349
467.2	-0.00964789	-0.00766901	0.00142149
467.4	-0.00972383	-0.00756236	0.00171479
467.6	-0.00916482	-0.00728149	0.00204604
467.8	-0.00945099	-0.00767394	0.00159601
468	-0.0101144	-0.00795658	0.00124075
468.2	-0.0103528	-0.00740048	0.00127602
468.4	-0.00972883	-0.00646998	0.00215931
468.6	-0.00999366	-0.00670029	0.0018146
468.8	-0.0100546	-0.00640015	0.00164321
469	-0.0108068	-0.00643912	0.0017525
469.2	-0.0106124	-0.00670368	0.00141246
469.4	-0.0110748	-0.00722748	0.00062499
469.6	-0.0112735	-0.00724817	0.00092013
469.8	-0.0115348	-0.00724565	0.00065127
470	-0.0113518	-0.00699699	0.00104669
470.2	-0.0114134	-0.00713089	0.00131574
470.4	-0.0116014	-0.0073661	0.00171961
470.6	-0.0116459	-0.00733335	0.0012555
470.8	-0.011141	-0.00721498	0.00170642
471	-0.010644	-0.00675815	0.00188324
471.2	-0.0103337	-0.00652176	0.00184005
471.4	-0.00990591	-0.00598728	0.00216959
471.6	-0.00958745	-0.00600472	0.00239226
471.8	-0.00942216	-0.00563097	0.00244167
472	-0.00941396	-0.00588177	0.0026994
472.2	-0.00905238	-0.00542139	0.00287575
472.4	-0.0085303	-0.00504264	0.00269091
472.6	-0.00868008	-0.00564343	0.00219561
472.8	-0.00888397	-0.00627589	0.00194752
473	-0.00916281	-0.00567759	0.00259332
473.2	-0.00938712	-0.00570233	0.00209721
473.4	-0.00972279	-0.00548062	0.00212261
473.6	-0.00987566	-0.00530209	0.00226226
473.8	-0.0102123	-0.00519988	0.00231721
474	-0.00975606	-0.00496324	0.00235384
474.2	-0.0101915	-0.00527205	0.0023326
474.4	-0.0102448	-0.00528364	0.00253858
474.6	-0.0104068	-0.004936	0.00208644
474.8	-0.010099	-0.00465961	0.00224746
475	-0.00986767	-0.00492681	0.00229005
475.2	-0.0100838	-0.00536162	0.00187973
475.4	-0.00983612	-0.0050942	0.00188847
475.6	-0.00972891	-0.0054541	0.00230771
475.8	-0.009288	-0.00543528	0.00242188
476	-0.00897854	-0.00573817	0.00250151
476.2	-0.00837695	-0.00530576	0.00264863
476.4	-0.00817026	-0.00536405	0.00293262
476.6	-0.00832188	-0.00546845	0.00324548
476.8	-0.0086977	-0.00602572	0.00324901
477	-0.00891137	-0.00559977	0.00342566
477.2	-0.00955805	-0.00565671	0.00294601
477.4	-0.00972404	-0.00547349	0.00324842
477.6	-0.0103483	-0.00559495	0.00332779
477.8	-0.0104464	-0.00531001	0.0033893
478	-0.0103844	-0.00543294	0.00321518
478.2	-0.0108077	-0.00601381	0.00318981
478.4	-0.0106778	-0.00573306	0.00334524
478.6	-0.0108009	-0.00531723	0.00269915
478.8	-0.0113423	-0.0059015	0.00207093
479	-0.011255	-0.00618556	0.00237918
479.2	-0.0110368	-0.00617417	0.00218724
479.4	-0.0107448	-0.00624549	0.00183378
479.6	-0.0108597	-0.00636437	0.00216348
479.8	-0.0101399	-0.00632574	0.00213684
480	-0.0094466	-0.00571777	0.00216889
480.2	-0.00936384	-0.00570424	0.0024285
480.4	-0.00961205	-0.00594917	0.00250592
480.6	-0.00948322	-0.00595709	0.00234381
480.8	-0.00984803	-0.00646498	0.0021847
481	-0.00975426	-0.0060242	0.00195795
481.2	-0.00986252	-0.00522175	0.0020786
481.4	-0.00958429	-0.00499853	0.00216436
481.6	-0.00988788	-0.00518198	0.00190397
481.8	-0.00940795	-0.00511483	0.00167399
482	-0.00948858	-0.0050497	0.00151695
482.2	-0.00954988	-0.00499899	0.00139722
482.4	-0.00946926	-0.00449722	0.00164207
482.6	-0.00991443	-0.00475004	0.00098064
482.8	-0.0104659	-0.00555555	0.0011796
483	-0.00997179	-0.00525122	0.00203732
483.2	-0.00991911	-0.00503185	0.00167491
483.4	-0.0106082	-0.00588824	0.00087843
483.6	-0.0110671	-0.006044	0.00121549
483.8	-0.0104387	-0.00539596	0.0020804
484	-0.0109663	-0.00580975	0.00179746
484.2	-0.0117589	-0.00672082	0.00179224
484.4	-0.012354	-0.00708147	0.00145945
484.6	-0.0125603	-0.00710772	0.00144898
484.8	-0.0131874	-0.00743125	0.0007229
485	-0.0131425	-0.00685248	0.00098621
485.2	-0.0131237	-0.00717157	0.00037702
485.4	-0.0128965	-0.00784521	0.00013148
485.6	-0.0128078	-0.00803321	0.00034398
485.8	-0.0122955	-0.00778021	0.0008122
486	-0.0124908	-0.00754978	0.00054426
486.2	-0.0124827	-0.00783001	0.00024191
486.4	-0.0121929	-0.00806581	0.0007427
486.6	-0.0117333	-0.00765046	0.0011409
486.8	-0.0114166	-0.00752073	0.00139496
487	-0.0112254	-0.00675664	0.00105855
487.2	-0.0111187	-0.00693426	0.00033694
487.4	-0.0110893	-0.00688704	0.00047053
487.6	-0.0110811	-0.00678641	0.00095436
487.8	-0.0108002	-0.00633633	0.00129449
488	-0.0114164	-0.00724534	0.00031678
488.2	-0.0113081	-0.0071677	0.00052694
488.4	-0.0113713	-0.00688736	0.00043258
488.6	-0.0111034	-0.00704175	0.00044287
488.8	-0.0107572	-0.00717282	0.00036244
489	-0.0105779	-0.00741233	0.00044691
489.2	-0.0102323	-0.00738317	0.00018468
489.4	-0.0103165	-0.00711927	0.00036126
489.6	-0.0104167	-0.00680005	0.00076489
489.8	-0.0105775	-0.00668782	0.00086405
490	-0.0106714	-0.006631	0.00067631
490.2	-0.0104329	-0.00678026	0.00046803
490.4	-0.0102805	-0.00621131	0.00123019
490.6	-0.0102296	-0.00579465	0.00107829
490.8	-0.0103587	-0.00600931	0.00084192
491	-0.0106336	-0.00606265	0.00069426
491.2	-0.0102031	-0.00625302	0.00098582
491.4	-0.0102281	-0.00638453	0.00132346
491.6	-0.0104667	-0.0069854	0.00145504
491.8	-0.0103176	-0.00712667	0.00124349
492	-0.0101849	-0.00677178	0.00156112
492.2	-0.00986223	-0.00638779	0.00197928
492.4	-0.00992038	-0.00638741	0.00190764
492.6	-0.00982231	-0.00669774	0.00191241
492.8	-0.0104847	-0.00689523	0.00121132
493	-0.0108951	-0.00681122	0.00084957
493.2	-0.0112905	-0.00603361	0.00076228
493.4	-0.0115023	-0.00568177	0.0006156
493.6	-0.011076	-0.00549078	0.00119961
493.8	-0.0112988	-0.00524237	0.00142357
494	-0.0113084	-0.00521954	0.00113509
494.2	-0.0112024	-0.00512853	0.00121658
494.4	-0.0115076	-0.00464478	0.00163112
494.6	-0.0115245	-0.00486879	0.00151065
494.8	-0.0109626	-0.00484633	0.00194498
495	-0.0110397	-0.00512549	0.00190382
495.2	-0.0108583	-0.00503503	0.00185033
495.4	-0.0107712	-0.00505667	0.00222859
495.6	-0.0102308	-0.00486477	0.00219096
495.8	-0.0103449	-0.00537891	0.00174874
496	-0.00968741	-0.00499047	0.00244756
496.2	-0.00953938	-0.00531259	0.00244538
496.4	-0.00970211	-0.00605475	0.00184746
496.6	-0.00972954	-0.00663489	0.0017484
496.8	-0.0100956	-0.007169	0.00120305
497	-0.00940427	-0.00696163	0.00159995
497.2	-0.0093969	-0.00673864	0.00185394
497.4	-0.00923494	-0.0063809	0.00195
497.6	-0.00906002	-0.00661264	0.00220203
497.8	-0.00917811	-0.00604409	0.00258824
498	-0.00956598	-0.00620511	0.00217913
498.2	-0.00977098	-0.00629266	0.00204128
498.4	-0.0105841	-0.00665052	0.00134945
498.6	-0.010591	-0.00707018	0.00113618
498.8	-0.0107648	-0.00686523	0.00141375
499	-0.0110996	-0.00679606	0.00104367
499.2	-0.0109859	-0.00623399	0.00090815
499.4	-0.0111152	-0.00602355	0.00101573
499.6	-0.0107267	-0.00610899	0.00081139
499.8	-0.0107378	-0.00656008	0.00074718
500	-0.0102659	-0.00625059	0.00129614
500.2	-0.0103951	-0.00579626	0.00109634
500.4	-0.0109218	-0.00651202	0.00043913
500.6	-0.0110603	-0.00667189	0.00066974
500.8	-0.0115886	-0.0068445	0.00065913
501	-0.0117651	-0.00629366	0.00112033
501.2	-0.0125514	-0.00652322	0.00092607
501.4	-0.013069	-0.00657308	0.00052466
501.6	-0.0134809	-0.00659308	0.00083829
501.8	-0.013974	-0.00615031	0.00114955
502	-0.014713	-0.00716295	0.00026179
502.2	-0.0149022	-0.00807205	-0.0002212
502.4	-0.0148696	-0.00890458	-0.00035889
502.6	-0.0142356	-0.0088811	-0.00026373
502.8	-0.0141925	-0.00895674	-0.0004591
503	-0.0135541	-0.00846402	5.841e-05
503.2	-0.0132327	-0.00804516	0.00019423
503.4	-0.0133443	-0.00853314	0.0002892
503.6	-0.0121238	-0.00826914	0.00059325
503.8	-0.0117839	-0.0084545	0.0006506
504	-0.0114586	-0.00787349	0.00116243
504.2	-0.0108818	-0.00738536	0.00151059
504.4	-0.0107116	-0.00758221	0.0013946
504.6	-0.010345	-0.00705548	0.00152569
504.8	-0.0104388	-0.00697108	0.00166968
505	-0.0102101	-0.00643482	0.00176801
505.2	-0.0105102	-0.00666156	0.00142458
505.4	-0.0106783	-0.00642302	0.00124773
505.6	-0.0106922	-0.00598868	0.00128351
505.8	-0.0107456	-0.00594321	0.00130725
506	-0.0102956	-0.00604915	0.00086516
506.2	-0.0102488	-0.00613849	0.00057581
506.4	-0.0101007	-0.0062929	0.00012063
506.6	-0.0109508	-0.00674492	-0.00070893
506.8	-0.0112255	-0.00709624	-0.00092287
507	-0.011713	-0.00751476	-0.00058474
507.2	-0.0121631	-0.00804939	-0.00122309
507.4	-0.0127669	-0.00861355	-0.00142892
507.6	-0.0124942	-0.0083365	-0.00122191
507.8	-0.0128477	-0.00861867	-0.00138943
508	-0.0126331	-0.00865098	-0.00128429
508.2	-0.0122429	-0.00878231	-0.00114188
508.4	-0.0120472	-0.0084961	-0.00104415
508.6	-0.0117529	-0.00814873	-0.00077408
508.8	-0.0115972	-0.00766651	-5.358e-05
509	-0.0110493	-0.00677356	0.00054655
509.2	-0.0105914	-0.00621555	0.00096848
509.4	-0.00994975	-0.00524722	0.00191286
509.6	-0.00922479	-0.00417639	0.00292346
509.8	-0.0090734	-0.00398697	0.00316525
510	-0.008487	-0.00348687	0.003279
510.2	-0.00857627	-0.00346983	0.00310517
510.4	-0.00892706	-0.00397234	0.00280265
510.6	-0.00966087	-0.00448552	0.0025921
510.8	-0.00983223	-0.004963	0.00228847
511	-0.0107527	-0.00577939	0.00196536
511.2	-0.0104774	-0.00563616	0.00206987
511.4	-0.01107	-0.00605283	0.00144211
511.6	-0.0114924	-0.00627052	0.00094552
511.8	-0.011433	-0.00677021	0.00030934
512	-0.0112039	-0.00721426	0.00020757
512.2	-0.0114582	-0.00740611	0.00014291
512.4	-0.0114103	-0.00761646	-0.0001009
512.6	-0.0116642	-0.00771622	-2.823e-05
512.8	-0.0119917	-0.0074779	-0.00049467
513	-0.0119442	-0.00719278	-0.00062559
513.2	-0.0120466	-0.00695991	-0.00088833
513.4	-0.012085	-0.00704847	-0.00088381
513.6	-0.0123651	-0.0069722	-0.0010423
513.8	-0.0123896	-0.00747951	-0.00167707
514	-0.0124264	-0.0072937	-0.00151967
514.2	-0.0126422	-0.00708279	-0.00176554
514.4	-0.0129668	-0.00717858	-0.00210255
514.6	-0.0131104	-0.00727235	-0.00180198
514.8	-0.0131177	-0.00745194	-0.00156645
515	-0.0131768	-0.00734414	-0.00080714
515.2	-0.0123617	-0.00727381	-3.912e-05
515.4	-0.0124254	-0.00734453	5.648e-05
515.6	-0.0118855	-0.00701734	0.00015657
515.8	-0.0111117	-0.00737308	0.00058777
516	-0.0110577	-0.00779223	0.00058375
516.2	-0.0111907	-0.00809224	0.00048802
516.4	-0.0109355	-0.00855249	4.134e-05
516.6	-0.0110166	-0.00824718	3.229e-05
516.8	-0.0110511	-0.00826932	-0.00062896
517	-0.011323	-0.00834261	-0.00082392
517.2	-0.011303	-0.00819625	-0.00095716
517.4	-0.0112244	-0.00829487	-0.00113732
517.6	-0.0113677	-0.00801549	-0.00152426
517.8	-0.0112997	-0.00815062	-0.00179732
518	-0.0118394	-0.00757253	-0.00187823
518.2	-0.011546	-0.00717422	-0.00186439
518.4	-0.0114412	-0.00693009	-0.00192299
518.6	-0.0118021	-0.00689249	-0.00132162
518.8	-0.0120672	-0.00637723	-0.00103894
519	-0.0125723	-0.00620775	-0.00096401
519.2	-0.0122273	-0.00572542	-0.00083071
519.4	-0.0119522	-0.00538045	-0.00088605
519.6	-0.0117906	-0.00511393	-0.00156643
519.8	-0.0120397	-0.00587424	-0.00130939
520	-0.0124851	-0.00601094	-0.00186621
520.2	-0.0125817	-0.00618012	-0.00201959
520.4	-0.0123974	-0.00664849	-0.00215811
520.6	-0.0125251	-0.00707623	-0.00216164
520.8	-0.0127058	-0.00751753	-0.00216318
521	-0.0129749	-0.00777841	-0.00171192
521.2	-0.0130746	-0.00822957	-0.0018295
521.4	-0.0130028	-0.00867518	-0.00194636
521.6	-0.0128034	-0.0088563	-0.00209869
521.8	-0.0126938	-0.00919377	-0.00188581
522	-0.0126317	-0.00922208	-0.00157682
522.2	-0.011847	-0.00940742	-0.00119882
522.4	-0.0117191	-0.00935871	-0.00119165
522.6	-0.0120445	-0.00950316	-0.00110295
522.8	-0.0118118	-0.00851055	-0.00082244
523	-0.0119744	-0.0081847	-0.0010111
523.2	-0.0116632	-0.00776239	-0.0008655
523.4	-0.0114473	-0.00752112	-0.00085335
523.6	-0.0116816	-0.0070999	-0.00102893
523.8	-0.0116066	-0.0069397	-0.00042095
524	-0.0118983	-0.00668933	-0.00069785
524.2	-0.0118456	-0.00689862	-0.00087788
524.4	-0.0120809	-0.00710566	-0.0010195
524.6	-0.0120058	-0.00726901	-0.00082262
524.8	-0.0120128	-0.00669145	-0.00046861
525	-0.0124447	-0.00715919	-0.00064805
525.2	-0.0125281	-0.00744846	-0.00114539
525.4	-0.0120323	-0.00734964	-0.0010992
525.6	-0.0120888	-0.00748545	-0.00112757
525.8	-0.0115076	-0.00749592	-0.00077372
526	-0.0115764	-0.00789997	-0.00072026
526.2	-0.0114189	-0.00798089	-0.0009304
526.4	-0.0115599	-0.00801352	-0.00120805
526.6	-0.0121236	-0.00816723	-0.00149349
526.8	-0.012275	-0.00765039	-0.00184423
527	-0.0126892	-0.00803419	-0.00227758
527.2	-0.0127488	-0.00842272	-0.0025824
527.4	-0.012751	-0.00794451	-0.00291208
527.6	-0.0124526	-0.00780234	-0.00302474
527.8	-0.0125695	-0.007351	-0.00229272
528	-0.0126379	-0.00766922	-0.00252457
528.2	-0.0122401	-0.00707018	-0.00215727
528.4	-0.0119416	-0.00662055	-0.00164634
528.6	-0.0114974	-0.00665749	-0.00126627
528.8	-0.011769	-0.0062126	-0.0011125
529	-0.0118801	-0.00673063	-0.00143501
529.2	-0.0114834	-0.00673112	-0.00113177
529.4	-0.0113039	-0.00675585	-0.00094099
529.6	-0.0111824	-0.00655255	-0.0004819
529.8	-0.0107645	-0.00659027	0.00015928
530	-0.0111794	-0.00708338	-0.00014704
530.2	-0.0112898	-0.0074645	-0.00057676
530.4	-0.0113574	-0.00806941	-0.00108757
530.6	-0.0119417	-0.00872582	-0.00174497
530.8	-0.0122243	-0.00885071	-0.00215444
531	-0.012359	-0.00959408	-0.0025191
531.2	-0.0127235	-0.00986104	-0.00264326
531.4	-0.0128009	-0.0095683	-0.00259045
531.6	-0.0127661	-0.00944365	-0.00235318
531.8	-0.0130227	-0.00934355	-0.00168424
532	-0.0125244	-0.00963404	-0.00177151
532.2	-0.0121622	-0.00873327	-0.00126221
532.4	-0.012073	-0.00875003	-0.00111516
532.6	-0.0122472	-0.00892062	-0.00106015
532.8	-0.0125768	-0.00853062	-0.00126509
533	-0.0126441	-0.00858305	-0.00116455
533.2	-0.0123194	-0.00815005	-0.00058564
533.4	-0.0123278	-0.00812928	-0.00035804
533.6	-0.0119094	-0.00776005	5.5e-05
533.8	-0.0121743	-0.00811998	0.00040727
534	-0.0121575	-0.00841621	0.00028835
534.2	-0.0124304	-0.0089463	0.00043843
534.4	-0.0124642	-0.00905115	0.00066323
534.6	-0.0127921	-0.00914059	0.00047228
534.8	-0.0131312	-0.00913715	0.00052213
535	-0.0131076	-0.00912796	-0.00010185
535.2	-0.0132892	-0.00855874	-0.00022843
535.4	-0.0132548	-0.00849045	-0.00069164
535.6	-0.0130962	-0.00812001	-0.0007714
535.8	-0.0128991	-0.00844712	-0.0009088
536	-0.0123705	-0.0079394	-0.00084172
536.2	-0.0124343	-0.00753293	-0.00110838
536.4	-0.0126013	-0.00780677	-0.00136516
536.6	-0.0121833	-0.0074709	-0.00129553
536.8	-0.0120019	-0.00722314	-0.00148938
537	-0.0121168	-0.00736474	-0.00127819
537.2	-0.0114673	-0.00738858	-0.00109184
537.4	-0.0114647	-0.00776644	-0.00124174
537.6	-0.0112325	-0.00757409	-0.00080052
537.8	-0.0115301	-0.0076477	-0.00070107
538	-0.0112823	-0.00777466	-0.00048855
538.2	-0.0112113	-0.00790866	-9.133e-05
538.4	-0.0111575	-0.00821402	-0.00034007
538.6	-0.0114355	-0.0082691	-0.00058289
538.8	-0.0118789	-0.0081248	-0.00080718
539	-0.0115927	-0.00769211	-0.00093929
539.2	-0.011471	-0.00745489	-0.00090196
539.4	-0.0116823	-0.00770426	-0.00059142
539.6	-0.0117098	-0.00760242	-0.00041998
539.8	-0.0117672	-0.00737741	-0.00047462
540	-0.0114487	-0.00703594	3.779e-05
540.2	-0.011659	-0.00738428	-0.00015405
540.4	-0.011794	-0.00758678	-0.00011288
540.6	-0.0110663	-0.00713621	0.00048587
540.8	-0.0114626	-0.00774952	6.119e-05
541	-0.0114696	-0.0082782	-0.00014019
541.2	-0.0108617	-0.00802305	0.00025791
541.4	-0.0108715	-0.00793232	0.00024427
541.6	-0.0110411	-0.00750978	0.00028503
541.8	-0.0104973	-0.00739748	7.732e-05
542	-0.0103318	-0.00762813	0.00019751
542.2	-0.0100291	-0.00715226	0.00049549
542.4	-0.0105259	-0.00708267	0.00030991
542.6	-0.0104805	-0.00656172	0.0005448
542.8	-0.0110329	-0.00689323	0.00019444
543	-0.0105955	-0.00665482	0.00073946
543.2	-0.0104946	-0.00628484	0.0009731
543.4	-0.0106286	-0.00620305	0.00161672
543.6	-0.0108198	-0.00618902	0.00101656
543.8	-0.0106705	-0.00530778	0.00153073
544	-0.0108633	-0.00583857	0.00135403
544.2	-0.0111382	-0.00640207	0.00103604
544.4	-0.0114374	-0.00668169	0.00102004
544.6	-0.0112063	-0.00706302	0.00094442
544.8	-0.0116506	-0.00786848	0.00053034
545	-0.0114819	-0.00798184	0.0006703
545.2	-0.0116814	-0.00818453	0.00038435
545.4	-0.0120384	-0.00782137	0.00045856
545.6	-0.0120761	-0.00792985	0.00017459
545.8	-0.0114271	-0.00790888	0.00021184
546	-0.0110981	-0.0074932	0.00040357
546.2	-0.010903	-0.00699645	0.00039521
546.4	-0.0110815	-0.00684962	0.00038179
546.6	-0.0110341	-0.00678833	0.00046414
546.8	-0.0113787	-0.00735382	0.0001674
547	-0.0105495	-0.00647592	0.00056478
547.2	-0.0104785	-0.00638591	0.0005866
547.4	-0.0106592	-0.00642484	0.00068525
547.6	-0.0110153	-0.00670653	0.000518
547.8	-0.0109343	-0.00619802	0.00144842
548	-0.0112686	-0.00660567	0.00087583
548.2	-0.0113785	-0.00679939	0.00107887
548.4	-0.0115157	-0.00674479	0.00143294
548.6	-0.0113798	-0.00677441	0.0013323
548.8	-0.0117229	-0.00640149	0.00150599
549	-0.0118245	-0.00646749	0.0012887
549.2	-0.0116198	-0.00661021	0.00063259
549.4	-0.0116948	-0.00618767	0.00060134
549.6	-0.0113963	-0.00721179	-0.00029144
549.8	-0.0111022	-0.00715822	-0.0004325
550	-0.010818	-0.00734827	-0.00070225
550.2	-0.0115842	-0.00769967	-0.00129487
550.4	-0.0116466	-0.00794109	-0.001428
550.6	-0.0120485	-0.00826091	-0.00177862
550.8	-0.012113	-0.00868806	-0.00187127
551	-0.0119918	-0.00839539	-0.00166201
551.2	-0.0120997	-0.00912931	-0.00135437
551.4	-0.0122837	-0.00888442	-0.00068475
551.6	-0.0121753	-0.00896814	-0.00013294
551.8	-0.0116753	-0.00808453	0.00045842
552	-0.0117055	-0.00745936	0.00038936
552.2	-0.0111031	-0.0068375	0.00106333
552.4	-0.0108251	-0.00632278	0.00166992
552.6	-0.0109185	-0.00640067	0.00124713
552.8	-0.0114619	-0.006269	0.00119019
553	-0.0109565	-0.00677922	0.00114688
553.2	-0.0107507	-0.00661496	0.00117586
553.4	-0.0109241	-0.00697815	0.00088134
553.6	-0.0108955	-0.00792727	0.00013962
553.8	-0.0111447	-0.00780392	5.886e-05
554	-0.0115754	-0.00837641	-4.445e-05
554.2	-0.0119616	-0.00868274	-0.00011058
554.4	-0.0118609	-0.00915585	-0.00028875
554.6	-0.0121028	-0.00924978	-0.00034316
554.8	-0.0125599	-0.00960198	-5.748e-05
555	-0.0123854	-0.0089102	-0.00012932
555.2	-0.0124411	-0.00895189	-0.00018726
555.4	-0.0124439	-0.00820181	0.00030692
555.6	-0.0120826	-0.00758277	0.00052177
555.8	-0.0121003	-0.00687571	0.00095043
556	-0.0122891	-0.00652038	0.00111097
556.2	-0.0120936	-0.00621188	0.0009813
556.4	-0.0124721	-0.0062724	0.00087743
556.6	-0.0121248	-0.00628927	0.00069516
556.8	-0.0116629	-0.0056039	0.00089828
557	-0.0114766	-0.0058658	0.00097891
557.2	-0.0111082	-0.00542573	0.00135181
557.4	-0.0109128	-0.00597687	0.00143667
557.6	-0.0105236	-0.00578527	0.00145764
557.8	-0.0106289	-0.00584582	0.00185338
558	-0.0105205	-0.00649828	0.00201424
558.2	-0.0100709	-0.00687003	0.00165189
558.4	-0.010042	-0.00767986	0.00126655
558.6	-0.0100278	-0.00741106	0.00104825
558.8	-0.0104111	-0.0075238	0.00073851
559	-0.00985798	-0.00687661	0.00033401
559.2	-0.0103719	-0.00756836	7.765e-05
559.4	-0.0107804	-0.00755974	0.00026188
559.6	-0.0113987	-0.00787225	0.00044939
559.8	-0.0118168	-0.00838625	0.00013032
560	-0.0123077	-0.00892105	-0.00015237
560.2	-0.0123852	-0.00925994	-0.00077635
560.4	-0.0126286	-0.00951649	-0.00082977
560.6	-0.0125905	-0.00948784	-0.00128456
560.8	-0.012713	-0.00957334	-0.00125156
561	-0.0127265	-0.0097364	-0.00100353
561.2	-0.0128533	-0.00939959	-0.00043638
561.4	-0.01277	-0.0093075	-0.00016466
561.6	-0.0126183	-0.00890192	-0.00031882
561.8	-0.013011	-0.00920124	-0.00045628
562	-0.0129492	-0.00926502	-0.00019576
562.2	-0.0128377	-0.0093329	-0.00060483
562.4	-0.0127881	-0.00939753	-0.00094816
562.6	-0.0126531	-0.00853698	-0.00072107
562.8	-0.0129338	-0.0088127	-0.00082951
563	-0.0127117	-0.00859292	-0.00062924
563.2	-0.0130871	-0.00879768	-0.00042419
563.4	-0.0130083	-0.00859742	0.00021693
563.6	-0.0129522	-0.00855934	0.00035741
563.8	-0.012767	-0.00832488	0.00029665
564	-0.012961	-0.00802646	0.00089549
564.2	-0.0127161	-0.00775877	0.00090548
564.4	-0.0126734	-0.00688975	0.00108101
564.6	-0.0121082	-0.00618046	0.00105693
564.8	-0.0116012	-0.0060468	0.00105375
565	-0.0111302	-0.00564327	0.00086431
565.2	-0.0112557	-0.00555406	0.0008733
565.4	-0.0106423	-0.00533633	0.00047056
565.6	-0.0112557	-0.00573869	-5.55e-06
565.8	-0.0115597	-0.00582609	8.627e-05
566	-0.011775	-0.0061418	-0.00025989
566.2	-0.0118491	-0.00651571	-0.00088191
566.4	-0.0118336	-0.00666902	-0.00103101
566.6	-0.0122906	-0.00688087	-0.00087425
566.8	-0.0127338	-0.00707149	-0.00096498
567	-0.0127558	-0.00709977	-0.00078643
567.2	-0.0125939	-0.00669637	-0.00063053
567.4	-0.0126648	-0.00667427	-0.00029056
567.6	-0.012529	-0.00619459	-0.0001049
567.8	-0.0122688	-0.00572225	0.00055321
568	-0.0124531	-0.00554499	0.00104188
568.2	-0.01276	-0.00546043	0.00093346
568.4	-0.0125182	-0.00462931	0.001074
568.6	-0.0121477	-0.00473572	0.00093544
568.8	-0.0120391	-0.0048474	0.00110159
569	-0.0119901	-0.00460025	0.00149746
569.2	-0.0118792	-0.00509235	0.00154916
569.4	-0.011915	-0.00555395	0.00154294
569.6	-0.0123711	-0.00657356	0.00137022
569.8	-0.0124939	-0.00723652	0.00077505
570	-0.0131163	-0.0082427	-0.00028178
570.2	-0.0132802	-0.00903035	-0.00071768
570.4	-0.0131882	-0.00905007	-0.00082417
570.6	-0.0133581	-0.0090822	-0.00130855
570.8	-0.013479	-0.00874038	-0.00130226
571	-0.0132071	-0.00888039	-0.00176017
571.2	-0.0126763	-0.00860059	-0.00137301
571.4	-0.0126935	-0.00917174	-0.00124296
571.6	-0.0122615	-0.00871638	-0.00138407
571.8	-0.0120733	-0.00823988	-0.00124215
572	-0.0120235	-0.00773934	-0.0004737
572.2	-0.0117817	-0.00701327	8.925e-05
572.4	-0.0116196	-0.00690532	0.00023098
572.6	-0.0117007	-0.00678983	0.0006316
572.8	-0.0120414	-0.00629835	0.00123859
573	-0.0118674	-0.0058709	0.00180351
573.2	-0.0111333	-0.00557887	0.00221753
573.4	-0.0111406	-0.0059435	0.00186605
573.6	-0.0112818	-0.00679614	0.00129815
573.8	-0.0116266	-0.00713727	0.00112045
574	-0.0116922	-0.00723527	0.00120805
574.2	-0.0112102	-0.00735186	0.00093304
574.4	-0.0109701	-0.00702845	0.0010547
574.6	-0.0111965	-0.00687632	0.0005224
574.8	-0.0116546	-0.00710016	0.00024327
575	-0.011782	-0.00759552	-0.00017749
575.2	-0.0116791	-0.00785247	0.00011375
575.4	-0.0118867	-0.00792579	-1.478e-05
575.6	-0.0120786	-0.00723111	4.96e-05
575.8	-0.011956	-0.00689338	0.0006951
576	-0.0121991	-0.00695043	0.00112881
576.2	-0.0127202	-0.00727713	0.00081543
576.4	-0.0133221	-0.00759549	0.00022502
576.6	-0.0130885	-0.00709293	0.00087309
576.8	-0.0129002	-0.00651502	0.00141353
577	-0.0120537	-0.00625765	0.00161651
577.2	-0.0117304	-0.00625914	0.00143759
577.4	-0.0121196	-0.00673638	0.00075625
577.6	-0.0123746	-0.00713149	0.0008605
577.8	-0.0124832	-0.00752827	0.00105532
578	-0.0122732	-0.00749681	0.00109412
578.2	-0.0121652	-0.00783526	0.00055007
578.4	-0.0128233	-0.00821346	0.00015534
578.6	-0.0128172	-0.00796665	-3.766e-05
578.8	-0.0128884	-0.00843497	-0.0001493
579	-0.0125752	-0.00841308	2.014e-05
579.2	-0.0122657	-0.00832312	0.00047884
579.4	-0.0119721	-0.00810451	0.00072741
579.6	-0.0116037	-0.00746187	0.00108469
579.8	-0.0118281	-0.00785642	0.00085369
580	-0.0121763	-0.0080896	0.00036716
580.2	-0.0122717	-0.00809999	0.0002228
580.4	-0.0120959	-0.00822441	9.877e-05
580.6	-0.0115988	-0.00788112	0.00095443
580.8	-0.0118217	-0.0075753	0.00103819
581	-0.0116262	-0.00740308	0.00085098
581.2	-0.0119557	-0.00761551	0.00066479
581.4	-0.0123296	-0.00745801	0.00072032
581.6	-0.0124747	-0.00786192	0.00103292
581.8	-0.0129272	-0.0081208	0.00134684
582	-0.0128212	-0.00730235	0.00169025
582.2	-0.0131258	-0.0073017	0.00103118
582.4	-0.0130034	-0.0069721	0.00104141
582.6	-0.012579	-0.00593674	0.00179886
582.8	-0.0123015	-0.00611469	0.00191299
583	-0.012017	-0.00585544	0.0018937
583.2	-0.0121279	-0.00592088	0.00169629
583.4	-0.0119403	-0.00574587	0.00184193
583.6	-0.0118498	-0.00531552	0.00226578
583.8	-0.0122575	-0.00603603	0.00148283
584	-0.012275	-0.00620353	0.00105195
584.2	-0.012187	-0.0060984	0.00121015
584.4	-0.0125974	-0.00636416	0.00102427
584.6	-0.0128226	-0.0066147	0.00103387
584.8	-0.0131424	-0.00696295	0.00072007
585	-0.012551	-0.00753131	0.00066986
585.2	-0.0123167	-0.00807657	0.00041971
585.4	-0.0126508	-0.00822406	0.00035465
585.6	-0.0123597	-0.00787572	0.00096139
585.8	-0.0132229	-0.00816992	0.00086899
586	-0.0128022	-0.00745371	0.00141906
586.2	-0.01304	-0.0074813	0.00100248
586.4	-0.013056	-0.00745408	0.00100754
586.6	-0.0131013	-0.0076027	0.00131693
586.8	-0.0130765	-0.00793622	0.00124348
587	-0.0133122	-0.00792718	0.00108823
587.2	-0.013526	-0.00777216	0.00086497
587.4	-0.0133142	-0.00777201	0.00098434
587.6	-0.0127817	-0.00744291	0.00124723
587.8	-0.0126347	-0.00777867	0.00038603
588	-0.0129286	-0.00764735	0.0006608
588.2	-0.0127218	-0.00718302	0.00111076
588.4	-0.0132915	-0.00785369	0.00062293
588.6	-0.0130549	-0.00800393	0.00044204
588.8	-0.0127463	-0.00796688	0.0003707
589	-0.0120218	-0.00812803	0.00021727
589.2	-0.0119245	-0.00779285	-2.447e-05
589.4	-0.0121882	-0.00751788	0.00017191
589.6	-0.0122065	-0.00679678	0.00104383
589.8	-0.0126395	-0.0069841	0.00135193
590	-0.0120273	-0.00628967	0.00172834
590.2	-0.0124018	-0.0067565	0.00081235
590.4	-0.01238	-0.00707321	0.00099103
590.6	-0.0118859	-0.00683281	0.00145284
590.8	-0.0120642	-0.00706285	0.00153769
591	-0.0121916	-0.00720746	0.0012109
591.2	-0.0118015	-0.00717552	0.00116989
591.4	-0.0121398	-0.00784138	0.00053325
591.6	-0.0121137	-0.00773851	0.00058892
591.8	-0.0126976	-0.00860364	0.00013348
592	-0.0131943	-0.00866417	0.0004216
592.2	-0.0134523	-0.00906719	0.0001805
592.4	-0.0132541	-0.00919139	7.195e-05
592.6	-0.0131792	-0.00893757	1.555e-05
592.8	-0.0128036	-0.00902034	-0.00015744
593	-0.013035	-0.00915811	-0.00016194
593.2	-0.0124293	-0.0087018	0.00066513
593.4	-0.0125621	-0.00852022	0.00115696
593.6	-0.0123116	-0.00837916	0.00135855
593.8	-0.01183	-0.00823516	0.00195115
594	-0.0115013	-0.00762436	0.00151652
594.2	-0.0117901	-0.00779533	0.00159612
594.4	-0.0108973	-0.00750067	0.00271129
594.6	-0.0107931	-0.00727928	0.00300362
594.8	-0.0107363	-0.00743156	0.00308821
595	-0.0109018	-0.00710284	0.00271868
595.2	-0.0111152	-0.00718915	0.00216597
595.4	-0.011808	-0.00713358	0.00193772
595.6	-0.0118174	-0.00686853	0.00253791
595.8	-0.0123803	-0.00739286	0.00192412
596	-0.0120857	-0.00658496	0.00164338
596.2	-0.0126414	-0.00667041	0.00139593
596.4	-0.0124228	-0.00597421	0.00174127
596.6	-0.0128923	-0.00586317	0.00177197
596.8	-0.0131423	-0.00599039	0.00202159
597	-0.0138344	-0.00627756	0.00202726
597.2	-0.0131091	-0.00614135	0.00262085
597.4	-0.0137114	-0.00665553	0.00207563
597.6	-0.0136637	-0.00674616	0.00215598
597.8	-0.0134132	-0.0064956	0.00221518
598	-0.0129715	-0.00610351	0.00227424
598.2	-0.0127012	-0.00623097	0.00277051
598.4	-0.0124882	-0.00680314	0.00257654
598.6	-0.0126736	-0.00679014	0.00235875
598.8	-0.0121365	-0.00700168	0.00209666
599	-0.0121218	-0.00742969	0.00162553
599.2	-0.0118359	-0.00764022	0.0015691
599.4	-0.011314	-0.00761563	0.00176045
599.6	-0.0107681	-0.00766256	0.00190755
599.8	-0.0110584	-0.00808819	0.00145818
600	-0.0108106	-0.00768613	0.00143706
600.2	-0.0115725	-0.00799537	0.0015542
600.4	-0.0115283	-0.00771159	0.00169587
600.6	-0.0118921	-0.00789573	0.00181287
600.8	-0.0125307	-0.00819789	0.00147515
601	-0.0124609	-0.00824923	0.00132538
601.2	-0.012302	-0.00799403	0.00171176
601.4	-0.0130103	-0.00820687	0.00147648
601.6	-0.0130473	-0.00779657	0.00196781
601.8	-0.0128708	-0.00717668	0.00130537
602	-0.0133793	-0.00668316	0.00167228
602.2	-0.013222	-0.00641797	0.00134107
602.4	-0.0134638	-0.00671362	0.00105394
602.6	-0.0128167	-0.00637888	0.00112292
602.8	-0.0123998	-0.00601556	0.00132522
603	-0.0128114	-0.00613326	0.00102515
603.2	-0.0125607	-0.00548659	0.00114255
603.4	-0.0129572	-0.00545339	0.00096321
603.6	-0.0126578	-0.0050527	0.00186804
603.8	-0.0130559	-0.00549547	0.0016002
604	-0.0131297	-0.00520983	0.00164884
604.2	-0.0137622	-0.00543477	0.00138851
604.4	-0.0134535	-0.0054747	0.00182399
604.6	-0.0138866	-0.00637377	0.00189628
604.8	-0.0139347	-0.00677189	0.00176607
605	-0.0135356	-0.00719833	0.00201704
605.2	-0.0139418	-0.00762924	0.00203458
605.4	-0.0142281	-0.00844002	0.00186407
605.6	-0.0137963	-0.0082828	0.00231549
605.8	-0.0134262	-0.00785074	0.00225424
606	-0.0131359	-0.00808952	0.00270454
606.2	-0.0124078	-0.0082158	0.00261854
606.4	-0.0122755	-0.00825691	0.00307975
606.6	-0.0120496	-0.00775296	0.00363961
606.8	-0.0117156	-0.00659106	0.00411094
607	-0.0121826	-0.00677787	0.00398917
607.2	-0.0118878	-0.00620846	0.00413014
607.4	-0.0121331	-0.00618874	0.00395195
607.6	-0.0118499	-0.00595916	0.0039867
607.8	-0.0122081	-0.00629093	0.00318463
608	-0.0127847	-0.00606315	0.00288182
608.2	-0.0127221	-0.00626481	0.00260789
608.4	-0.0127306	-0.00656068	0.00218849
608.6	-0.0130985	-0.00684575	0.00172271
608.8	-0.0130175	-0.00687729	0.00120888
609	-0.0132216	-0.00770583	0.000446
609.2	-0.0134918	-0.00811434	-2.939e-05
609.4	-0.0135249	-0.00849272	-0.00033638
609.6	-0.0131821	-0.0083699	7.918e-05
609.8	-0.0130842	-0.00860364	0.00011498
610	-0.0133321	-0.00936436	0.00011175
610.2	-0.0136473	-0.00931777	0.00019513
610.4	-0.013353	-0.00883235	0.00055021
610.6	-0.0133956	-0.00893857	0.00085883
610.8	-0.0130789	-0.00865033	0.00090484
611	-0.0131283	-0.00909303	0.00110449
611.2	-0.0125058	-0.00856311	0.00150979
611.4	-0.012968	-0.00921623	0.0013358
611.6	-0.012952	-0.00927241	0.00101836
611.8	-0.0132062	-0.00939647	0.00104308
612	-0.0136505	-0.00946075	0.0010442
612.2	-0.0137538	-0.00947997	0.00086058
612.4	-0.0135468	-0.00883337	0.00058836
612.6	-0.0134565	-0.00838295	0.00126123
612.8	-0.0139882	-0.00853394	0.00081203
613	-0.0141476	-0.00812388	0.0007508
613.2	-0.0140073	-0.00758312	0.00109856
613.4	-0.0137617	-0.00725973	0.00160796
613.6	-0.0131103	-0.00685839	0.00235582
613.8	-0.0129476	-0.00684506	0.00224262
614	-0.0127183	-0.00676373	0.00192433
614.2	-0.0126756	-0.00637736	0.0016714
614.4	-0.0120771	-0.00659353	0.00183344
614.6	-0.011992	-0.00664206	0.00188921
614.8	-0.0116819	-0.00651204	0.00173743
615	-0.0110439	-0.00628011	0.0021
615.2	-0.0108413	-0.0065576	0.00240087
615.4	-0.0112692	-0.00721069	0.0020949
615.6	-0.0108064	-0.00677301	0.00199973
615.8	-0.0113496	-0.00694473	0.00212576
616	-0.0113621	-0.00687746	0.00211695
616.2	-0.0111614	-0.00667014	0.00165773
616.4	-0.0108559	-0.00637035	0.00173775
616.6	-0.0115305	-0.0065071	0.00186459
616.8	-0.0118946	-0.00633814	0.00167233
617	-0.0117519	-0.00569194	0.00211987
617.2	-0.0120183	-0.00605142	0.00219536
617.4	-0.0119583	-0.005681	0.00249592
617.6	-0.0119509	-0.00625237	0.00217263
617.8	-0.0122926	-0.00671214	0.00136892
618	-0.0121666	-0.00672632	0.00103341
618.2	-0.0123755	-0.0069211	0.00142936
618.4	-0.012373	-0.0073396	0.00129475
618.6	-0.0125411	-0.00731969	0.00099892
618.8	-0.0126776	-0.00770626	0.00106312
619	-0.0125054	-0.00792802	0.00134916
619.2	-0.0123712	-0.00757463	0.00179927
619.4	-0.0126935	-0.00740543	0.00167991
619.6	-0.0126593	-0.00782328	0.00161757
619.8	-0.0131186	-0.00811983	0.00160758
620	-0.012672	-0.00810263	0.00160377
620.2	-0.0127045	-0.00839152	0.00124073
620.4	-0.0130668	-0.00858087	0.00117691
620.6	-0.013489	-0.00864893	0.00114842
620.8	-0.0130737	-0.00809231	0.00158832
621	-0.0131246	-0.0077909	0.00184005
621.2	-0.0133224	-0.00759443	0.00199345
621.4	-0.013294	-0.00723215	0.00168972
621.6	-0.0131489	-0.00730728	0.00172098
621.8	-0.0128228	-0.00702072	0.0017208
622	-0.0120346	-0.00642096	0.00210837
622.2	-0.0123038	-0.00664323	0.00205014
622.4	-0.0126461	-0.00694459	0.00201665
622.6	-0.0122464	-0.00674431	0.00217777
622.8	-0.0122358	-0.00660539	0.002383
623	-0.0120067	-0.00634612	0.00241673
623.2	-0.0119281	-0.00600646	0.00258827
623.4	-0.0123532	-0.00643727	0.00173636
623.6	-0.0121959	-0.00704146	0.00151839
623.8	-0.0125989	-0.00737521	0.00150774
624	-0.0128101	-0.0077914	0.00133747
624.2	-0.0132559	-0.00817073	0.00134858
624.4	-0.0139455	-0.00839333	0.00102618
624.6	-0.0138384	-0.00795121	0.00121721
624.8	-0.0136516	-0.00751884	0.00155534
625	-0.0138962	-0.00766866	0.00120889
625.2	-0.0139963	-0.00768357	0.00144156
625.4	-0.0138555	-0.00778388	0.00164253
625.6	-0.0136882	-0.00768654	0.00221731
625.8	-0.0133783	-0.00771541	0.00248797
626	-0.013243	-0.00752371	0.00204296
626.2	-0.013685	-0.00737867	0.00226018
626.4	-0.0138572	-0.00776044	0.00244082
626.6	-0.0138425	-0.00722301	0.00231126
626.8	-0.0137801	-0.00704479	0.00217819
627	-0.0133167	-0.00670786	0.00201831
627.2	-0.0133807	-0.00715033	0.00211935
627.4	-0.0134121	-0.00721389	0.00209971
627.6	-0.0135768	-0.0082079	0.00196401
627.8	-0.0141195	-0.00792846	0.00208389
628	-0.0140697	-0.00802105	0.00216548
628.2	-0.0138819	-0.00794938	0.00199132
628.4	-0.0136715	-0.00769104	0.00128205
628.6	-0.0127661	-0.00719059	0.00173067
628.8	-0.0127334	-0.00745869	0.00161132
629	-0.0126356	-0.00785451	0.00173273
629.2	-0.0121303	-0.00791588	0.00190154
629.4	-0.011863	-0.00757077	0.00235366
629.6	-0.0121286	-0.00735614	0.00167673
629.8	-0.0122051	-0.00726576	0.00146417
630	-0.0123698	-0.0069246	0.00062276
630.2	-0.0125884	-0.006518	0.00111864
630.4	-0.0128811	-0.00666307	0.00101361
630.6	-0.0133824	-0.00593257	0.00109314
630.8	-0.0129717	-0.00580614	0.0010665
631	-0.0130147	-0.00584873	0.00123161
631.2	-0.0136526	-0.00652934	0.00148463
631.4	-0.0138976	-0.00661874	0.00141574
631.6	-0.0140083	-0.00661554	0.00101294
631.8	-0.0134888	-0.00598446	0.00129211
632	-0.0130438	-0.00647755	0.00161179
632.2	-0.0122875	-0.00622519	0.00148679
632.4	-0.0118021	-0.00635034	0.00108453
632.6	-0.0115027	-0.00650747	0.00217969
632.8	-0.0114201	-0.00676575	0.00228005
633	-0.0110022	-0.00678799	0.00254702
633.2	-0.0103901	-0.00658572	0.0025133
633.4	-0.0105059	-0.00655658	0.00264079
633.6	-0.0105954	-0.00670979	0.00215292
633.8	-0.0106474	-0.00686452	0.00211656
634	-0.0106438	-0.00667816	0.00198962
634.2	-0.0107957	-0.0067715	0.00220643
634.4	-0.0112029	-0.00684969	0.00200837
634.6	-0.0117284	-0.00711616	0.00147074
[truncated: 2,001 more rows]

## Sheet: CH11-P104
Time1	1E-05	2.5E-06	6.25E-07
235	-0.00401797	-0.00140008	-0.00056545
235.2	-0.00319407	-0.00193601	-0.00080155
235.4	-0.0024985	-0.00236959	-0.00093215
235.6	-0.00196113	-0.00312928	-0.00107002
235.8	-0.00126065	-0.00372932	-0.0015516
236	-0.00047816	-0.00429282	-0.00169199
236.2	0.00037727	-0.00413768	-0.00191109
236.4	0.00108511	-0.00426527	-0.00213628
236.6	0.00127389	-0.00452752	-0.00214256
236.8	0.00162736	-0.00446343	-0.0022958
237	0.00203773	-0.00354663	-0.00205757
237.2	0.00213606	-0.00262762	-0.001642
237.4	0.00221206	-0.00293025	-0.00180695
237.6	0.00293999	-0.00268934	-0.00182973
237.8	0.00342553	-0.00258408	-0.0019911
238	0.00378766	-0.00188649	-0.0019001
238.2	0.00459469	-0.0015559	-0.00225526
238.4	0.00614407	-0.0001485	-0.00157276
238.6	0.00667144	-0.0002939	-0.00168606
238.8	0.00723422	7.063e-05	-0.00151821
239	0.00837106	0.00044552	-0.00152785
239.2	0.00913768	0.00099873	-0.00107645
239.4	0.00924681	0.00071245	-0.00083104
239.6	0.00948744	0.0006708	-0.00103458
239.8	0.0101353	0.00082136	-0.00115707
240	0.010755	0.00122953	-0.00056848
240.2	0.0110642	0.00135941	-0.00065792
240.4	0.0107679	0.00085304	-0.00064891
240.6	0.0106473	0.00051728	-0.00082137
240.8	0.0109182	0.00090529	-0.00058812
241	0.0106458	0.00128574	-0.00049522
241.2	0.0110792	0.00140661	-0.00048002
241.4	0.0109853	0.00096861	-0.0010894
241.6	0.0112623	0.00059515	-0.00171594
241.8	0.0113219	0.00046331	-0.0020057
242	0.012316	0.00098152	-0.00196736
242.2	0.0129287	0.0005497	-0.00242776
242.4	0.014253	0.00153574	-0.00146539
242.6	0.0147376	0.00154087	-0.00083127
242.8	0.0153073	0.00198272	-0.00060312
243	0.016127	0.00227175	-0.00031334
243.2	0.0167274	0.0027636	-0.0001856
243.4	0.0167678	0.00283241	8.01e-06
243.6	0.0175056	0.00365631	3.796e-05
243.8	0.0176363	0.00399756	0.00055315
244	0.0178551	0.00438827	0.00053115
244.2	0.0181512	0.00443604	0.00050967
244.4	0.0179794	0.00452278	0.00061089
244.6	0.0182368	0.00478041	0.00015452
244.8	0.018605	0.00525343	0.00072705
245	0.0186853	0.00561675	3.486e-05
245.2	0.0195456	0.00597417	-7.21e-05
245.4	0.0191962	0.0054448	-0.00033554
245.6	0.0191663	0.0049242	-0.0010467
245.8	0.0194364	0.00537356	-0.00113254
246	0.0203484	0.00555105	-0.0013601
246.2	0.0196893	0.00407249	-0.00196493
246.4	0.0200589	0.0042889	-0.00149037
246.6	0.0199994	0.00337917	-0.00162721
246.8	0.020421	0.00250638	-0.00215448
247	0.0209633	0.00318744	-0.00205765
247.2	0.0211994	0.00280627	-0.00249682
247.4	0.0213581	0.00269133	-0.00299553
247.6	0.0218133	0.00254363	-0.00331621
247.8	0.0220638	0.00238032	-0.00319093
248	0.0223207	0.00274808	-0.00351065
248.2	0.0229554	0.00299162	-0.00306108
248.4	0.0229769	0.00304828	-0.00283625
248.6	0.0239335	0.00369439	-0.00282466
248.8	0.0240436	0.00378426	-0.0024351
249	0.0243043	0.00464335	-0.00239259
249.2	0.0246631	0.00507167	-0.00208463
249.4	0.0246541	0.00557017	-0.00188706
249.6	0.0251314	0.0058195	-0.00202884
249.8	0.0256591	0.00689436	-0.00153743
250	0.0263847	0.00741945	-0.00118418
250.2	0.0261467	0.00675326	-0.0012942
250.4	0.0268475	0.00704558	-0.00085192
250.6	0.0271651	0.00633069	-0.00094654
250.8	0.0282452	0.00658329	-0.00054342
251	0.0285093	0.00713734	-0.00080339
251.2	0.0285897	0.0062685	-0.00126144
251.4	0.0290312	0.00620819	-0.00085587
251.6	0.0296309	0.0065235	-0.0001463
251.8	0.0303145	0.00635601	0.00026616
252	0.03058	0.00629482	0.0003935
252.2	0.0305663	0.00581775	0.00050851
252.4	0.0307318	0.00590949	0.00090457
252.6	0.031011	0.00604462	0.00060125
252.8	0.0303905	0.00576842	0.00034367
253	0.0310468	0.00662939	0.00062593
253.2	0.0312889	0.00711526	0.00067944
253.4	0.0312503	0.00692543	0.00065463
253.6	0.0319599	0.0067738	0.00049101
253.8	0.0326517	0.00786338	0.00050677
254	0.0336055	0.00832241	0.00080988
254.2	0.0337406	0.00795186	0.00022257
254.4	0.0339827	0.00758874	-0.00026032
254.6	0.0339192	0.00779771	-0.0004622
254.8	0.0343871	0.007881	-0.00055387
255	0.0335208	0.00763506	-0.00103286
255.2	0.0330587	0.00749374	-0.0007643
255.4	0.0334914	0.00837815	0.00021136
255.6	0.0335584	0.00857237	0.00032666
255.8	0.0336924	0.0080964	4.51e-05
256	0.0334072	0.00771357	5.081e-05
256.2	0.0332301	0.00794891	0.00040623
256.4	0.0335157	0.00830493	0.00075593
256.6	0.0337856	0.00835856	0.00063594
256.8	0.0341053	0.00842309	0.00117894
257	0.0343997	0.00886599	0.00134733
257.2	0.0346271	0.00927223	0.00139772
257.4	0.03509	0.00891445	0.00076542
257.6	0.0355806	0.00930431	0.00039474
257.8	0.0363281	0.0102419	0.00073492
258	0.0366672	0.0103522	0.00027075
258.2	0.0367218	0.010024	-0.00029077
258.4	0.0368132	0.00965682	-0.00129185
258.6	0.0368908	0.00940354	-0.00138122
258.8	0.0372613	0.00927876	-0.00156807
259	0.0368398	0.009264	-0.00150782
259.2	0.0370993	0.00922657	-0.00133657
259.4	0.0374516	0.00925831	-0.00113331
259.6	0.0377289	0.00891361	-0.00127965
259.8	0.0382577	0.00883513	-0.00108419
260	0.0383863	0.00878984	-0.00072831
260.2	0.0390445	0.00915571	3.087e-05
260.4	0.0392573	0.00895344	5.05e-06
260.6	0.0397555	0.00964204	0.000317
260.8	0.0399272	0.010433	0.00086332
261	0.0399137	0.0108586	0.00055023
261.2	0.0403523	0.0115227	0.00070164
261.4	0.0407708	0.0118836	0.00031164
261.6	0.0407571	0.0124148	0.00052424
261.8	0.0414329	0.0122829	0.0007219
262	0.041608	0.0121441	0.00034064
262.2	0.0419934	0.0116398	4.027e-05
262.4	0.0422107	0.0111358	-0.00039377
262.6	0.0427452	0.0116204	0.00022033
262.8	0.0432377	0.0119097	0.00026717
263	0.0432276	0.0112949	0.00054571
263.2	0.0435509	0.0109066	0.00024177
263.4	0.0433963	0.0107268	0.0001421
263.6	0.0438982	0.010802	-0.00019569
263.8	0.0441091	0.0108268	-8.636e-05
264	0.0439746	0.0106703	-0.00017845
264.2	0.044059	0.0107631	-1.62e-06
264.4	0.0442461	0.011101	-0.00016904
264.6	0.0444397	0.0117569	0.00049009
264.8	0.0446366	0.0116833	0.00058367
265	0.0446738	0.0114882	0.00040595
265.2	0.0454037	0.0117874	0.00036766
265.4	0.0458722	0.0121001	0.00010628
265.6	0.04611	0.0122641	4.4e-05
265.8	0.0467783	0.0120089	0.00032798
266	0.0469973	0.0122794	0.00077397
266.2	0.0473611	0.0117906	0.0005321
266.4	0.0473587	0.0118746	0.00055926
266.6	0.0478104	0.0130241	0.00101152
266.8	0.0481021	0.0129315	0.00039036
267	0.0480761	0.0127032	0.0003794
267.2	0.0477678	0.0123383	-0.00022288
267.4	0.0472466	0.0122091	-0.00023141
267.6	0.0474868	0.0121262	-0.00042073
267.8	0.0473625	0.0122822	-0.00016339
268	0.047101	0.0124856	-0.00021126
268.2	0.0473704	0.0132429	0.0002865
268.4	0.0475872	0.0127086	0.00045421
268.6	0.0477528	0.0122276	0.00080917
268.8	0.0475164	0.0118327	0.00032175
269	0.0474243	0.0118628	-0.00022002
269.2	0.0479162	0.0120973	-0.00014388
269.4	0.0479354	0.0124115	-5.401e-05
269.6	0.0483062	0.0127937	0.00022161
269.8	0.0486637	0.0129744	0.00070789
270	0.0490013	0.0132262	0.00088929
270.2	0.0491336	0.0135033	0.00080606
270.4	0.049544	0.0139804	0.00053601
270.6	0.0499767	0.0144659	0.0007447
270.8	0.050548	0.0144933	0.00080182
271	0.0502239	0.0144972	0.00150525
271.2	0.0506672	0.0145574	0.00193894
271.4	0.0508259	0.0150023	0.00273177
271.6	0.0510252	0.0149411	0.0029311
271.8	0.0515378	0.0152776	0.00330486
272	0.0514931	0.0153831	0.00345151
272.2	0.051914	0.0150578	0.00395219
272.4	0.0517529	0.0137746	0.00359106
272.6	0.0513085	0.0136763	0.00296255
272.8	0.0506918	0.0132182	0.00247061
273	0.0507812	0.0132026	0.00223436
273.2	0.0511885	0.0135973	0.00243055
273.4	0.0514673	0.0139487	0.00246277
273.6	0.0517883	0.0143685	0.00246607
273.8	0.0520746	0.014981	0.00250613
274	0.0527882	0.0152729	0.0025929
274.2	0.0525459	0.0149703	0.00250069
274.4	0.0529116	0.0150319	0.0022384
274.6	0.053277	0.0154175	0.00300378
274.8	0.0538295	0.0157012	0.00323509
275	0.0541422	0.0156104	0.00307196
275.2	0.0545123	0.0156203	0.00354764
275.4	0.054773	0.0157484	0.00406491
275.6	0.0553151	0.0160203	0.00352949
275.8	0.0558119	0.016396	0.00346526
276	0.0554875	0.016112	0.00317964
276.2	0.0553702	0.0158803	0.00283051
276.4	0.0551322	0.0159881	0.00230106
276.6	0.0549051	0.0160128	0.00171392
276.8	0.0551783	0.0159555	0.00156722
277	0.0555606	0.0161461	0.00164106
277.2	0.0552036	0.0161615	0.0011865
277.4	0.0558606	0.0166424	0.00172621
277.6	0.0558005	0.0168152	0.00164833
277.8	0.0560306	0.0171495	0.00205366
278	0.0558835	0.0167597	0.0020468
278.2	0.0554365	0.0164854	0.00214549
278.4	0.0560266	0.0168374	0.00247567
278.6	0.0561685	0.0164178	0.00265475
278.8	0.0563871	0.016248	0.00242362
279	0.0565322	0.0158513	0.00255673
279.2	0.0562699	0.0158593	0.00295206
279.4	0.0567305	0.0159525	0.00254263
279.6	0.0570145	0.0158963	0.00194696
279.8	0.0571368	0.0159288	0.00235961
280	0.0571187	0.0159668	0.00236363
280.2	0.0571724	0.0160224	0.00185821
280.4	0.0572634	0.0156803	0.00191519
280.6	0.0575671	0.015627	0.00184027
280.8	0.0578384	0.0156908	0.00226238
281	0.0581948	0.0158243	0.00233939
281.2	0.0588078	0.0159221	0.00235676
281.4	0.0601947	0.016973	0.00292351
281.6	0.060423	0.0178179	0.00305339
281.8	0.0611548	0.0179686	0.00344842
282	0.0620389	0.0180818	0.00382992
282.2	0.0629793	0.0191098	0.00435809
282.4	0.063711	0.0198771	0.00492807
282.6	0.0638995	0.0205402	0.00488354
282.8	0.0643958	0.0211017	0.00514377
283	0.064679	0.0214028	0.00544357
283.2	0.0645246	0.0213649	0.0050802
283.4	0.0644737	0.0210839	0.00494391
283.6	0.0649746	0.0215745	0.00520684
283.8	0.0646868	0.021451	0.00538547
284	0.0644741	0.0211079	0.00472405
284.2	0.0643806	0.0204758	0.00436596
284.4	0.0634932	0.0191797	0.00381787
284.6	0.0634149	0.0191026	0.00352837
284.8	0.0637018	0.0188545	0.00365629
285	0.0638806	0.0185256	0.00333038
285.2	0.0637116	0.0180205	0.00304286
285.4	0.0639421	0.0183346	0.0032517
285.6	0.0641079	0.0180417	0.00357572
285.8	0.0642346	0.0173791	0.0036071
286	0.0648373	0.0183203	0.00446774
286.2	0.0654244	0.0196451	0.00500578
286.4	0.0653613	0.0202425	0.00554605
286.6	0.0658051	0.0211969	0.00580802
286.8	0.0658147	0.0217997	0.00629589
287	0.0659285	0.0223624	0.00681728
287.2	0.0659475	0.022152	0.00627211
287.4	0.065753	0.0222422	0.00593808
287.6	0.0658718	0.0222256	0.00559789
287.8	0.0655965	0.0215947	0.00522055
288	0.0658502	0.021471	0.00500415
288.2	0.0656339	0.0209844	0.00485034
288.4	0.0651333	0.020148	0.00401791
288.6	0.0654563	0.0200291	0.0041247
288.8	0.0656838	0.0200691	0.0043459
289	0.065384	0.0194517	0.00426927
289.2	0.0654678	0.0193479	0.00467786
289.4	0.0660031	0.0193125	0.00523092
289.6	0.0658585	0.018546	0.00499293
289.8	0.0663674	0.0190398	0.00514707
290	0.0670391	0.0194646	0.00544066
290.2	0.067516	0.019891	0.00586202
290.4	0.0675045	0.0199658	0.00603978
290.6	0.0675324	0.020033	0.0059808
290.8	0.0676537	0.0205361	0.00641916
291	0.0683657	0.0208081	0.00688249
291.2	0.0681862	0.0202877	0.00568655
291.4	0.0682309	0.0202508	0.00543221
291.6	0.0682201	0.0203937	0.00540435
291.8	0.0681091	0.0201605	0.00523726
292	0.0685645	0.0202596	0.00524567
292.2	0.0687598	0.0201752	0.00449131
292.4	0.0687888	0.0202124	0.00413619
292.6	0.0686639	0.0201907	0.00408195
292.8	0.0687158	0.0202203	0.00414512
293	0.0688891	0.0207568	0.00453244
293.2	0.0691007	0.0208105	0.0046315
293.4	0.0689802	0.0203885	0.00375077
293.6	0.0690208	0.0197165	0.00321595
293.8	0.0694567	0.0204925	0.00323565
294	0.0697906	0.0204913	0.00365552
294.2	0.0697003	0.0210158	0.00400342
294.4	0.0692557	0.0211135	0.0037827
294.6	0.0693103	0.0211262	0.00399733
294.8	0.069798	0.0223492	0.00483472
295	0.070443	0.0229848	0.00535573
295.2	0.0703242	0.0229281	0.00481112
295.4	0.0709913	0.0235789	0.00541015
295.6	0.0710268	0.0242399	0.00547581
295.8	0.0712912	0.0241794	0.00559582
296	0.0722095	0.0247412	0.00540152
296.2	0.0728123	0.0257395	0.00540888
296.4	0.0730603	0.0262494	0.00559588
296.6	0.073506	0.0263738	0.00525809
296.8	0.0741153	0.0265088	0.00538964
297	0.0741813	0.0268498	0.00542599
297.2	0.0741135	0.0261483	0.00468515
297.4	0.074071	0.0261811	0.00451269
297.6	0.0740192	0.0261215	0.00471076
297.8	0.073933	0.0263202	0.00469992
298	0.0737403	0.0257999	0.0045555
298.2	0.0727846	0.0253448	0.00412821
298.4	0.0722751	0.0247728	0.0036497
298.6	0.0724471	0.024293	0.00375473
298.8	0.0721052	0.0246087	0.00378854
299	0.0720387	0.0241997	0.00379572
299.2	0.0722112	0.0239859	0.00402223
299.4	0.0724654	0.0245586	0.00471603
299.6	0.0726915	0.0251892	0.00515067
299.8	0.0728404	0.0258681	0.00528976
300	0.073246	0.0258321	0.00504375
300.2	0.0733254	0.0264549	0.00513282
300.4	0.0731775	0.0265224	0.00498308
300.6	0.0736515	0.0263465	0.00488715
300.8	0.0737206	0.0265242	0.00538322
301	0.0735869	0.0263843	0.00554877
301.2	0.0734494	0.0262818	0.00509155
301.4	0.0736881	0.0262414	0.0054106
301.6	0.0735432	0.0254459	0.00490599
301.8	0.0738716	0.0248607	0.00422074
302	0.0740352	0.0243909	0.00355562
302.2	0.0739594	0.0241766	0.0037603
302.4	0.0739853	0.0236505	0.00321278
302.6	0.074016	0.0231229	0.00315782
302.8	0.0739375	0.0232141	0.00328867
303	0.0746543	0.0238598	0.00394961
303.2	0.0754888	0.0246165	0.00518325
303.4	0.0758685	0.0255291	0.00620271
303.6	0.076399	0.0260273	0.00619813
303.8	0.0763372	0.0263921	0.00612677
304	0.0763162	0.0260568	0.00651161
304.2	0.076161	0.0265849	0.00702301
304.4	0.0764148	0.0270591	0.0068715
304.6	0.077083	0.0268911	0.0070361
304.8	0.0771885	0.027305	0.00726538
305	0.0772864	0.0271753	0.00714496
305.2	0.0776464	0.0271961	0.00689766
305.4	0.077936	0.0271582	0.00682132
305.6	0.0778045	0.0267791	0.00600855
305.8	0.0785773	0.0274279	0.00615593
306	0.0782001	0.02707	0.00567829
306.2	0.0775074	0.026819	0.00543175
306.4	0.0769347	0.0268974	0.00489982
306.6	0.0766266	0.026724	0.00458543
306.8	0.0763562	0.027004	0.0043452
307	0.0769733	0.0274741	0.0045019
307.2	0.077389	0.0274423	0.00495492
307.4	0.0775448	0.0279077	0.00511656
307.6	0.0775723	0.0276686	0.00468854
307.8	0.0774484	0.0273549	0.00513154
308	0.0777008	0.027345	0.00520902
308.2	0.0780022	0.0270963	0.00501377
308.4	0.078378	0.0272338	0.00483795
308.6	0.0790675	0.0271581	0.00561138
308.8	0.0797776	0.0276782	0.00616988
309	0.0805312	0.0283098	0.0067365
309.2	0.0809965	0.028273	0.00691018
309.4	0.0813319	0.0285553	0.00734183
309.6	0.0817163	0.0288831	0.00694701
309.8	0.0821077	0.0296365	0.00745876
310	0.0812066	0.0298682	0.00700445
310.2	0.0808769	0.0303993	0.00651765
310.4	0.0805007	0.0310416	0.00671985
310.6	0.080129	0.0306666	0.00630762
310.8	0.0801855	0.0301167	0.00631053
311	0.0804948	0.0302409	0.00683956
311.2	0.0805697	0.0302837	0.00722069
311.4	0.0803639	0.0301982	0.00750548
311.6	0.0800479	0.0300383	0.00790193
311.8	0.0802294	0.0298446	0.00796863
312	0.0803441	0.0301296	0.00774105
312.2	0.0806207	0.0301567	0.00762623
312.4	0.0809864	0.0301855	0.00770762
312.6	0.0813591	0.0301951	0.00767057
312.8	0.0820861	0.0300786	0.00743931
313	0.082453	0.0301084	0.00723104
313.2	0.0828759	0.0297522	0.00699678
313.4	0.0835342	0.0301158	0.0069341
313.6	0.0840493	0.0300468	0.0065481
313.8	0.0843625	0.0302828	0.00704864
314	0.0840665	0.0302933	0.0064898
314.2	0.0843565	0.0300982	0.00653481
314.4	0.0842495	0.029933	0.00707795
314.6	0.0840121	0.0293029	0.00687232
314.8	0.0842952	0.0284593	0.00697117
315	0.084514	0.0291939	0.00733154
315.2	0.084233	0.0290687	0.00732937
315.4	0.0840068	0.0290798	0.00746182
315.6	0.0836246	0.0294577	0.00756483
315.8	0.0835772	0.029246	0.0071721
316	0.0834099	0.0294278	0.00730921
316.2	0.0833606	0.0296517	0.00686559
316.4	0.0835396	0.0298406	0.00698781
316.6	0.0836548	0.0303332	0.00700147
316.8	0.0841806	0.0304069	0.00723071
317	0.0839838	0.0305647	0.00714276
317.2	0.0841758	0.030517	0.00674444
317.4	0.0840647	0.030548	0.00624114
317.6	0.0843758	0.0306249	0.00634383
317.8	0.084299	0.0305192	0.0060705
318	0.0841899	0.0309712	0.00608077
318.2	0.0845353	0.0312643	0.00662402
318.4	0.0845473	0.0316545	0.00686987
318.6	0.0846191	0.0316948	0.00656141
318.8	0.0850483	0.0317742	0.00634964
319	0.0849272	0.032432	0.00665199
319.2	0.0850343	0.0320937	0.00643305
319.4	0.0849659	0.0324754	0.00670308
319.6	0.0852656	0.0324996	0.00688515
319.8	0.0855192	0.0326826	0.00731313
320	0.0857374	0.033178	0.00771174
320.2	0.0862395	0.0338754	0.00795878
320.4	0.0874496	0.0346508	0.0084576
320.6	0.0881489	0.0349794	0.00836436
320.8	0.0885862	0.0345501	0.0085681
321	0.0886257	0.0344098	0.0083009
321.2	0.088891	0.0343699	0.00816497
321.4	0.0890517	0.0343348	0.00832905
321.6	0.0897214	0.034639	0.00830624
321.8	0.0896267	0.0344887	0.0083338
322	0.0896262	0.0345519	0.00866826
322.2	0.0899847	0.0342038	0.00881529
322.4	0.0903205	0.0344322	0.00932033
322.6	0.0905055	0.0346725	0.00931243
322.8	0.0902377	0.0345531	0.00930094
323	0.0899544	0.0342499	0.00948681
323.2	0.0898619	0.0344174	0.00944951
323.4	0.0895586	0.0344236	0.00956616
323.6	0.0895207	0.0346136	0.00951652
323.8	0.0889871	0.0350545	0.00964045
324	0.08905	0.0352343	0.00992587
324.2	0.0894957	0.0351247	0.00952639
324.4	0.0896441	0.0352895	0.00921958
324.6	0.0899548	0.0355133	0.00892184
324.8	0.0899771	0.034933	0.00905169
325	0.0894074	0.0346298	0.00895734
325.2	0.0896838	0.0344211	0.00880407
325.4	0.0894307	0.0341786	0.00830858
325.6	0.0895524	0.0345034	0.00794403
325.8	0.0893106	0.0334592	0.00759778
326	0.0892042	0.0325833	0.00761746
326.2	0.0894437	0.0326664	0.00807813
326.4	0.0895336	0.0325717	0.0084279
326.6	0.0895692	0.0331142	0.00845857
326.8	0.0895373	0.0325882	0.008067
327	0.0895057	0.0321289	0.00823993
327.2	0.0893641	0.0325513	0.0081976
327.4	0.0896185	0.0326539	0.00826069
327.6	0.089358	0.0329782	0.00860979
327.8	0.0894487	0.0330549	0.00894224
328	0.0904343	0.0336481	0.00960559
328.2	0.0905194	0.0339393	0.00925627
328.4	0.0905661	0.0347498	0.00939456
328.6	0.0916854	0.0357704	0.00982659
328.8	0.0918084	0.0364422	0.0101299
329	0.0922211	0.0368184	0.0103775
329.2	0.0931717	0.0375291	0.0105007
329.4	0.0930136	0.0375134	0.0108024
329.6	0.0932338	0.0374297	0.0109411
329.8	0.0936488	0.0367625	0.0111675
330	0.0932745	0.0367864	0.011424
330.2	0.0933301	0.0370823	0.0117401
330.4	0.0929812	0.036355	0.0113789
330.6	0.0928879	0.035998	0.0106803
330.8	0.0925977	0.0351873	0.00993541
331	0.0921736	0.0342883	0.00966252
331.2	0.0916296	0.0340876	0.0090094
331.4	0.0916174	0.0335679	0.00896254
331.6	0.0913744	0.033027	0.00867585
331.8	0.09115	0.0332601	0.00853356
332	0.0913261	0.0337634	0.00847311
332.2	0.0910953	0.0338997	0.00812463
332.4	0.091454	0.0345053	0.0080885
332.6	0.0922725	0.0352985	0.00878245
332.8	0.0925667	0.0356062	0.00854856
333	0.0932416	0.0358926	0.0088847
333.2	0.0930215	0.0356098	0.00884745
333.4	0.0933836	0.0356901	0.00886734
333.6	0.0938109	0.0363172	0.0096264
333.8	0.0943582	0.0365724	0.0100888
334	0.0946713	0.037048	0.0103245
334.2	0.0949514	0.036887	0.0104759
334.4	0.0947628	0.0362406	0.0100443
334.6	0.0952663	0.0362019	0.00988198
334.8	0.0956513	0.0362883	0.0103302
335	0.0957726	0.0358778	0.0103312
335.2	0.0959883	0.0359629	0.0102138
335.4	0.0961593	0.0357997	0.0104497
335.6	0.0958345	0.0358204	0.0103432
335.8	0.0958649	0.036047	0.0103895
336	0.0961151	0.0361949	0.0100389
336.2	0.0959679	0.0364247	0.0100035
336.4	0.0959317	0.0366304	0.0101947
336.6	0.0963677	0.0369832	0.0103867
336.8	0.0964546	0.0371752	0.00977014
337	0.0963655	0.0377005	0.00991523
337.2	0.096394	0.0381819	0.00995113
337.4	0.0965403	0.0382599	0.00974709
337.6	0.0968625	0.0387386	0.0101936
337.8	0.0971336	0.0388567	0.0102269
338	0.0975674	0.0390275	0.0103101
338.2	0.0971725	0.0388224	0.0104783
338.4	0.0975142	0.0392514	0.0108067
338.6	0.0977853	0.0394357	0.0116074
338.8	0.0979783	0.0393092	0.012085
339	0.0976029	0.0391075	0.0114338
339.2	0.0971805	0.0387662	0.0111604
339.4	0.0972275	0.0384601	0.0113712
339.6	0.096824	0.0381413	0.0108515
339.8	0.0968958	0.038116	0.0109259
340	0.0971788	0.0387284	0.0113225
340.2	0.0971124	0.0391377	0.0112017
340.4	0.0977559	0.0393086	0.0115423
340.6	0.0978268	0.0395433	0.0110731
340.8	0.0975707	0.0395903	0.0109713
341	0.0981278	0.0399563	0.0111336
341.2	0.0988564	0.0405503	0.0111419
341.4	0.0987629	0.0397737	0.0101757
341.6	0.0993158	0.0399807	0.00998725
341.8	0.0993345	0.0399818	0.0100179
342	0.0991844	0.0402448	0.00980107
342.2	0.0989642	0.0404866	0.0101758
342.4	0.0992668	0.0409199	0.0105055
342.6	0.0989785	0.0407435	0.0107685
342.8	0.098991	0.0404494	0.0103225
343	0.0987252	0.0405297	0.0100522
343.2	0.0985048	0.0403477	0.0101025
343.4	0.0986185	0.0407058	0.0100031
343.6	0.0981877	0.0404307	0.0098546
343.8	0.0986119	0.0406569	0.0107613
344	0.0986484	0.0409715	0.0111598
344.2	0.0984712	0.0404572	0.010698
344.4	0.0986584	0.0403727	0.0109386
344.6	0.098115	0.0404573	0.0106956
344.8	0.0986617	0.0404554	0.011359
345	0.0993537	0.0406875	0.0111917
345.2	0.0998042	0.0408388	0.0113967
345.4	0.0994939	0.0405366	0.0112967
345.6	0.100159	0.0403619	0.0117475
345.8	0.100391	0.0406888	0.011896
346	0.100035	0.0406334	0.0119771
346.2	0.100138	0.0402938	0.0120892
346.4	0.100631	0.0402813	0.012194
346.6	0.100671	0.0398483	0.0124271
346.8	0.100458	0.0397132	0.0119405
347	0.100634	0.0398264	0.0121956
347.2	0.100431	0.0393971	0.0117279
347.4	0.0998262	0.0393272	0.0110259
347.6	0.100166	0.0389204	0.011149
347.8	0.100508	0.0397036	0.011782
348	0.100428	0.0396447	0.0116085
348.2	0.100513	0.0396875	0.0110837
348.4	0.100558	0.040346	0.0113453
348.6	0.100591	0.0408465	0.0112659
348.8	0.101146	0.0411024	0.0111983
349	0.101146	0.0416522	0.0109673
349.2	0.101793	0.0417314	0.0111319
349.4	0.101533	0.0421003	0.0113633
349.6	0.102404	0.0422679	0.011645
349.8	0.102009	0.0421395	0.0113272
350	0.102007	0.0421015	0.0109886
350.2	0.101629	0.0415883	0.010725
350.4	0.101109	0.0410384	0.0101305
350.6	0.100254	0.0403563	0.00997297
350.8	0.0999246	0.0401934	0.00928102
351	0.100105	0.0399857	0.00924743
351.2	0.0998289	0.0394353	0.00869494
351.4	0.0997407	0.0398488	0.00857152
351.6	0.100208	0.0399842	0.00891089
351.8	0.100434	0.040172	0.00943178
352	0.100253	0.039678	0.0093678
352.2	0.100187	0.0396243	0.00941419
352.4	0.100607	0.0395959	0.0100879
352.6	0.101011	0.0394091	0.00989252
352.8	0.101329	0.0392741	0.00978515
353	0.10194	0.0398138	0.0104575
353.2	0.102492	0.0397848	0.011289
353.4	0.102655	0.0399649	0.0118786
353.6	0.103524	0.0400182	0.0123819
353.8	0.104141	0.0400838	0.0126899
354	0.103986	0.040177	0.0125197
354.2	0.103254	0.0399706	0.0122398
354.4	0.103323	0.040406	0.012143
354.6	0.103353	0.0407727	0.0120824
354.8	0.103242	0.0415026	0.0117943
355	0.103228	0.0415395	0.0119966
355.2	0.103104	0.0415256	0.0119448
355.4	0.102558	0.0418109	0.0114992
355.6	0.101816	0.0415324	0.0106095
355.8	0.101426	0.0412578	0.0102983
356	0.10141	0.0412162	0.0100578
356.2	0.101376	0.0412209	0.0101147
356.4	0.101413	0.0407424	0.00984777
356.6	0.101179	0.0404388	0.00921991
356.8	0.10168	0.0407717	0.00948759
357	0.102134	0.0407823	0.0103657
357.2	0.102367	0.0406134	0.0106844
357.4	0.103387	0.0405474	0.0108792
357.6	0.103972	0.0404316	0.0111616
357.8	0.104191	0.0399755	0.0111555
358	0.103782	0.0402471	0.0109919
358.2	0.104844	0.0409814	0.0111927
358.4	0.105249	0.0408939	0.0112025
358.6	0.105243	0.0410958	0.0109389
358.8	0.105322	0.0411954	0.01127
359	0.105794	0.0411566	0.0116469
359.2	0.105883	0.041296	0.0115147
359.4	0.105944	0.0416708	0.0112414
359.6	0.105935	0.0422581	0.0109389
359.8	0.10622	0.0426755	0.0110388
360	0.106678	0.0431502	0.0113399
360.2	0.106247	0.0431427	0.0115361
360.4	0.106649	0.0432542	0.0115202
360.6	0.106513	0.0435504	0.011521
360.8	0.106879	0.0440441	0.0122568
361	0.106369	0.0439611	0.0122819
361.2	0.106426	0.0441502	0.0124093
361.4	0.106297	0.0437848	0.0127733
361.6	0.105854	0.043756	0.0128022
361.8	0.105801	0.0435583	0.0127181
362	0.10609	0.0438487	0.0125139
362.2	0.106727	0.0437978	0.012708
362.4	0.106059	0.0432059	0.0124182
362.6	0.106164	0.0431699	0.0123952
362.8	0.106248	0.0430462	0.0127385
363	0.106478	0.0433904	0.0127378
363.2	0.107034	0.0437177	0.0127438
363.4	0.106982	0.0440502	0.0121936
363.6	0.107047	0.0441687	0.0120161
363.8	0.107465	0.0445226	0.0119365
364	0.10759	0.0441392	0.0118764
364.2	0.107817	0.0442289	0.0120807
364.4	0.108484	0.0450403	0.0123471
364.6	0.107518	0.0444427	0.0117735
364.8	0.107579	0.044498	0.0121117
365	0.107454	0.0447181	0.0118186
365.2	0.10727	0.0442102	0.0118753
365.4	0.107178	0.0443137	0.0119787
365.6	0.107065	0.0442792	0.0120168
365.8	0.107242	0.0439128	0.0118443
366	0.107282	0.0439213	0.0118783
366.2	0.107214	0.0437481	0.0118956
366.4	0.10647	0.0432029	0.0112625
366.6	0.106497	0.0429457	0.0111497
366.8	0.106297	0.0430859	0.0115506
367	0.106412	0.0436577	0.0119111
367.2	0.106796	0.0436718	0.0115357
367.4	0.10696	0.0441892	0.0115811
367.6	0.107875	0.0447191	0.012189
367.8	0.107946	0.0453402	0.0117404
368	0.107953	0.0454265	0.0122235
368.2	0.108354	0.0457497	0.0126803
368.4	0.108635	0.0463335	0.0133118
368.6	0.108523	0.0461823	0.0133412
368.8	0.109139	0.0467653	0.0139262
369	0.109547	0.0474236	0.0143576
369.2	0.109665	0.0474313	0.0145188
369.4	0.109679	0.0475633	0.0144862
369.6	0.109714	0.0473959	0.014539
369.8	0.110118	0.0474942	0.014415
370	0.110425	0.047573	0.0143141
370.2	0.110172	0.0471576	0.0137733
370.4	0.109887	0.046808	0.0131903
370.6	0.11013	0.0469184	0.0135701
370.8	0.1101	0.0467247	0.0133781
371	0.110357	0.0469117	0.0125258
371.2	0.110844	0.0467722	0.0121664
371.4	0.110873	0.0467884	0.0120211
371.6	0.111118	0.0463694	0.0115083
371.8	0.111034	0.0464541	0.0114606
372	0.111037	0.0458974	0.0118839
372.2	0.111472	0.0453833	0.0116539
372.4	0.111756	0.0457527	0.0121367
372.6	0.111513	0.0457276	0.0122127
372.8	0.111317	0.0454923	0.012634
373	0.111026	0.0457519	0.0128211
373.2	0.111087	0.0457796	0.0125313
373.4	0.110985	0.0454605	0.0127171
373.6	0.11123	0.0457293	0.0130251
373.8	0.111427	0.0458546	0.0133103
374	0.111555	0.0465824	0.0136843
374.2	0.111208	0.046852	0.0136759
374.4	0.111448	0.047234	0.0136964
374.6	0.111104	0.0474618	0.0137427
374.8	0.111081	0.0474736	0.0130584
375	0.111282	0.0477747	0.0131501
375.2	0.111359	0.0476551	0.0138718
375.4	0.11135	0.0472894	0.0135998
375.6	0.11199	0.0472935	0.0137343
375.8	0.112405	0.0470405	0.0141149
376	0.112542	0.0466295	0.0136119
376.2	0.112537	0.0469134	0.0134596
376.4	0.112327	0.0471104	0.0135606
376.6	0.112188	0.0473762	0.013689
376.8	0.112249	0.047371	0.0137057
377	0.111953	0.0476378	0.0135374
377.2	0.112171	0.0476737	0.0138822
377.4	0.112282	0.0479275	0.0140374
377.6	0.112009	0.0479441	0.0139016
377.8	0.111833	0.0484037	0.0139586
378	0.111712	0.048573	0.0138535
378.2	0.11185	0.0486807	0.0136549
378.4	0.111722	0.0488097	0.0133226
378.6	0.111036	0.0486978	0.0130366
378.8	0.111133	0.0484359	0.0124226
379	0.111273	0.0478031	0.0125665
379.2	0.111258	0.0476262	0.0126419
379.4	0.11121	0.0470989	0.0125218
379.6	0.111613	0.0471487	0.0124772
379.8	0.111691	0.0468472	0.0127176
380	0.111543	0.0473889	0.0127712
380.2	0.111536	0.0480767	0.0132744
380.4	0.111716	0.0482937	0.0135703
380.6	0.112027	0.0485541	0.013428
380.8	0.112154	0.0488366	0.0138579
381	0.112022	0.0489714	0.014501
381.2	0.112309	0.0485139	0.0139664
381.4	0.112827	0.0485317	0.0136012
381.6	0.113101	0.0478045	0.013465
381.8	0.11349	0.0480261	0.0134483
382	0.113972	0.0478388	0.0136731
382.2	0.114091	0.0481971	0.0138442
382.4	0.114223	0.0483776	0.0137633
382.6	0.113956	0.0478236	0.0131984
382.8	0.114073	0.0476989	0.0125913
383	0.113945	0.0476729	0.0125157
383.2	0.11408	0.0482087	0.0126494
383.4	0.114723	0.0484852	0.0130724
383.6	0.1153	0.0493183	0.0133024
383.8	0.115372	0.0492783	0.013751
384	0.115469	0.0499404	0.0139013
384.2	0.115469	0.0505843	0.0145062
384.4	0.115175	0.0502804	0.0140315
384.6	0.115409	0.0505779	0.0139133
384.8	0.115087	0.0502759	0.0142162
385	0.114873	0.0497339	0.0141131
385.2	0.114812	0.049019	0.0132622
385.4	0.114574	0.0483246	0.0134191
385.6	0.114444	0.0476348	0.013227
385.8	0.113983	0.0477474	0.0133164
386	0.114102	0.0481139	0.0135999
386.2	0.114032	0.048229	0.0131397
386.4	0.114595	0.048222	0.0132885
386.6	0.11389	0.0478017	0.0128698
386.8	0.11418	0.0484137	0.0129298
387	0.11432	0.0481197	0.0129987
387.2	0.115017	0.0482085	0.0134264
387.4	0.115724	0.0485775	0.0138728
387.6	0.115924	0.0487489	0.013816
387.8	0.115874	0.048447	0.0138162
388	0.115882	0.0483379	0.0138064
388.2	0.115939	0.0483621	0.0139984
388.4	0.116055	0.0480721	0.0134059
388.6	0.11607	0.0479128	0.0137556
388.8	0.115879	0.0474773	0.0133583
389	0.116026	0.0475818	0.0132171
389.2	0.115912	0.0471727	0.0131363
389.4	0.115646	0.0468108	0.0127803
389.6	0.115693	0.0471021	0.0126552
389.8	0.116084	0.0479595	0.0130572
390	0.116543	0.0487535	0.0130485
390.2	0.11661	0.0486463	0.0128035
390.4	0.11648	0.0489485	0.0130333
390.6	0.116205	0.049031	0.0129113
390.8	0.116728	0.0490001	0.0130036
391	0.116285	0.048322	0.0127545
391.2	0.115981	0.0484394	0.0123935
391.4	0.116107	0.0485609	0.0125017
391.6	0.116411	0.0487607	0.012372
391.8	0.116685	0.0483607	0.0125153
392	0.117136	0.0488284	0.0129611
392.2	0.11721	0.0491489	0.012882
392.4	0.117469	0.0499064	0.013514
392.6	0.116819	0.049657	0.0132652
392.8	0.117449	0.0500222	0.0136246
393	0.117604	0.0499833	0.013304
393.2	0.117286	0.0500021	0.0134829
393.4	0.116786	0.0501477	0.0136095
393.6	0.117248	0.0504377	0.0143443
393.8	0.117836	0.0507011	0.0140943
394	0.117425	0.0505061	0.0137789
394.2	0.116959	0.0501146	0.0135662
394.4	0.116193	0.0499363	0.0132363
394.6	0.116166	0.0499144	0.0135035
394.8	0.115862	0.0493745	0.0132176
395	0.115171	0.0492755	0.0127142
395.2	0.115112	0.0489527	0.0125858
395.4	0.115332	0.0484866	0.0129737
395.6	0.115703	0.0485371	0.0134306
395.8	0.115633	0.0480083	0.013827
396	0.115462	0.0482128	0.0138159
396.2	0.115631	0.0481237	0.0139852
396.4	0.116034	0.048699	0.0148591
396.6	0.115721	0.0478451	0.0144187
396.8	0.116618	0.0479288	0.0146741
397	0.117003	0.0479769	0.013974
397.2	0.117019	0.0477909	0.0142092
397.4	0.117272	0.0479114	0.0142943
397.6	0.118119	0.0475653	0.0139657
397.8	0.118273	0.048022	0.0132779
398	0.118014	0.0480485	0.0130776
398.2	0.118045	0.0481666	0.0129988
398.4	0.11757	0.0483693	0.0127518
398.6	0.117696	0.048963	0.0127557
398.8	0.117878	0.0487091	0.012556
399	0.117597	0.0487649	0.0125697
399.2	0.117287	0.0486423	0.0129035
399.4	0.117186	0.0486846	0.0130864
399.6	0.117266	0.0490074	0.0136538
399.8	0.117533	0.0492802	0.0138318
400	0.117934	0.0497041	0.0140663
400.2	0.118515	0.050472	0.0151518
400.4	0.118705	0.0510056	0.0157726
400.6	0.118869	0.0512003	0.0156541
400.8	0.119327	0.0515477	0.0153952
401	0.120082	0.0519412	0.0155291
401.2	0.120224	0.0512425	0.0153648
401.4	0.120721	0.0512955	0.0153861
401.6	0.120924	0.0507744	0.0147583
401.8	0.121102	0.0511356	0.0146078
402	0.121436	0.0507032	0.0144286
402.2	0.121807	0.0508307	0.015284
402.4	0.121361	0.0505609	0.0148933
402.6	0.121648	0.0505015	0.0149598
402.8	0.121756	0.0501294	0.0150646
403	0.121546	0.049935	0.0149788
403.2	0.121242	0.0493538	0.0144359
403.4	0.121057	0.0485642	0.0138199
403.6	0.12088	0.0486054	0.0141426
403.8	0.120589	0.0485054	0.0135268
404	0.120191	0.0484369	0.0132415
404.2	0.120048	0.0492899	0.0133691
404.4	0.119686	0.0490156	0.0131654
404.6	0.119541	0.0492756	0.0131249
404.8	0.119661	0.0497297	0.0135048
405	0.120253	0.0501678	0.0135529
405.2	0.120331	0.0503402	0.013765
405.4	0.120819	0.0511667	0.0141934
405.6	0.120524	0.051295	0.0138891
405.8	0.120609	0.0518822	0.0141137
406	0.120859	0.0525089	0.0147703
406.2	0.120903	0.0530044	0.0157245
406.4	0.120636	0.0531711	0.0157323
406.6	0.120556	0.0533649	0.0159801
406.8	0.120913	0.0531789	0.016166
407	0.120468	0.0524879	0.0156186
407.2	0.120655	0.0515173	0.0151554
407.4	0.120125	0.051047	0.0148433
407.6	0.119923	0.0509546	0.0148765
407.8	0.119815	0.0507162	0.0145344
408	0.120348	0.0508083	0.0142907
408.2	0.120852	0.051297	0.0142474
408.4	0.121226	0.050611	0.0143789
408.6	0.121916	0.050896	0.0145685
408.8	0.122599	0.051342	0.0147115
409	0.122791	0.0508433	0.0141537
409.2	0.12247	0.0503949	0.0135075
409.4	0.122782	0.0505086	0.0133374
409.6	0.1216	0.0500026	0.0124607
409.8	0.121013	0.0500326	0.012106
410	0.120675	0.0506918	0.0124457
410.2	0.12011	0.0504156	0.0123385
410.4	0.119788	0.0504719	0.0128644
410.6	0.119563	0.050235	0.0129526
410.8	0.119748	0.0499841	0.0131809
411	0.11919	0.049232	0.0130321
411.2	0.119543	0.0491465	0.0132619
411.4	0.119482	0.0496773	0.0137835
411.6	0.120107	0.0504201	0.0145331
411.8	0.121075	0.0512271	0.0151471
412	0.121925	0.0516681	0.0149534
412.2	0.122304	0.0520468	0.0152862
412.4	0.122933	0.0523879	0.0155457
412.6	0.123308	0.0525753	0.015716
412.8	0.12327	0.0526495	0.015375
413	0.123507	0.0531704	0.0151072
413.2	0.123707	0.0534809	0.0149601
413.4	0.124017	0.0543249	0.015238
413.6	0.123124	0.0539919	0.0149615
413.8	0.123265	0.0541355	0.0149339
414	0.122771	0.0542057	0.0146509
414.2	0.122305	0.05336	0.0139731
414.4	0.121878	0.0535261	0.0144199
414.6	0.121813	0.0528006	0.0138031
414.8	0.121219	0.051914	0.0132858
415	0.121151	0.0513331	0.0130471
415.2	0.121225	0.0515053	0.0130807
415.4	0.121992	0.0519465	0.0138263
415.6	0.122093	0.0514181	0.0137351
415.8	0.122343	0.0511199	0.0140478
416	0.122151	0.0510852	0.0139438
416.2	0.122008	0.0511629	0.0146064
416.4	0.122371	0.0518175	0.0151126
416.6	0.122362	0.0515395	0.0151152
416.8	0.123071	0.0521426	0.0153252
417	0.122894	0.0525155	0.0156794
417.2	0.123277	0.0523068	0.0163673
417.4	0.123555	0.0524218	0.0166091
417.6	0.12361	0.0523568	0.0168248
417.8	0.12365	0.0523689	0.0167297
418	0.123666	0.0529643	0.0167253
418.2	0.123655	0.0531612	0.016915
418.4	0.123919	0.05354	0.0173143
418.6	0.124061	0.0530385	0.0168749
418.8	0.123644	0.053106	0.0166513
419	0.124482	0.0539055	0.0168553
419.2	0.124814	0.0543753	0.0172473
419.4	0.125454	0.0544686	0.0174156
419.6	0.125426	0.0544517	0.0170989
419.8	0.125392	0.0549715	0.0173528
420	0.125216	0.054921	0.0172764
420.2	0.125347	0.0549458	0.0176653
420.4	0.125262	0.0549515	0.0176373
420.6	0.12489	0.0546452	0.0171126
420.8	0.125012	0.0545925	0.0169792
421	0.124453	0.0537785	0.0167267
421.2	0.125203	0.0534003	0.0171598
421.4	0.125394	0.0534719	0.017231
421.6	0.126148	0.0538831	0.0173926
421.8	0.126315	0.0535166	0.0171431
422	0.126385	0.0541014	0.0176928
422.2	0.126026	0.053802	0.0179288
422.4	0.126254	0.054129	0.0180532
422.6	0.125844	0.0542307	0.0179527
422.8	0.126173	0.0543684	0.0181204
423	0.126505	0.0551695	0.0183824
423.2	0.126451	0.0554726	0.0183449
423.4	0.126131	0.0559692	0.01817
423.6	0.126073	0.0569839	0.018292
423.8	0.125849	0.0572865	0.0183982
424	0.125851	0.0571147	0.018644
424.2	0.125951	0.057763	0.0188185
424.4	0.125445	0.0573876	0.0183834
424.6	0.125437	0.0572948	0.0181656
424.8	0.125355	0.0566551	0.0178274
425	0.125353	0.055777	0.0173781
425.2	0.125412	0.0551197	0.0170519
425.4	0.125861	0.0549663	0.01667
425.6	0.125878	0.0545283	0.0161827
425.8	0.125147	0.05373	0.0156749
426	0.124554	0.0540299	0.0161061
426.2	0.124677	0.0532917	0.0158235
426.4	0.124766	0.0525887	0.0154527
426.6	0.124933	0.0524948	0.0156246
426.8	0.125108	0.0523073	0.0153419
427	0.124646	0.052713	0.0150861
427.2	0.124784	0.0525626	0.0148021
427.4	0.124665	0.0533467	0.0149747
427.6	0.125411	0.0539747	0.0153191
427.8	0.125439	0.0541963	0.0154519
428	0.125939	0.0542359	0.0157989
428.2	0.126257	0.0550204	0.0156037
428.4	0.126235	0.0545163	0.0156751
428.6	0.126679	0.0546941	0.0161592
428.8	0.126344	0.0546469	0.0157989
429	0.126378	0.0548363	0.0156745
429.2	0.126801	0.0551982	0.0156276
429.4	0.126669	0.0553179	0.0155975
429.6	0.12592	0.0557074	0.0155573
429.8	0.125805	0.056074	0.0160341
430	0.125909	0.055902	0.0160344
430.2	0.126073	0.0554728	0.01619
430.4	0.126095	0.0551404	0.0162156
430.6	0.126006	0.0554286	0.0165132
430.8	0.126019	0.0553522	0.0163812
431	0.125798	0.0551255	0.0158643
431.2	0.126165	0.0551837	0.0158449
431.4	0.126378	0.0554717	0.0155155
431.6	0.126879	0.0555587	0.0155253
431.8	0.127088	0.0557086	0.0155979
432	0.127557	0.0555718	0.0158346
432.2	0.127404	0.0553957	0.015593
432.4	0.127469	0.0548833	0.0162492
432.6	0.128091	0.05532	0.0163781
432.8	0.128029	0.0556921	0.0165194
433	0.128081	0.0560615	0.0164268
433.2	0.128305	0.0561265	0.0166792
433.4	0.128219	0.0561402	0.0175553
433.6	0.128137	0.0563543	0.0181514
433.8	0.128306	0.0561056	0.0183395
434	0.128461	0.0559589	0.0183184
434.2	0.128173	0.0561668	0.0183955
434.4	0.127927	0.0559343	0.018248
434.6	0.127409	0.056323	0.018305
434.8	0.127179	0.0564671	0.0181479
435	0.126698	0.0562476	0.0173095
435.2	0.126748	0.0562146	0.0166735
435.4	0.126571	0.0558271	0.0160661
435.6	0.126647	0.0557447	0.0160878
435.8	0.126754	0.0554792	0.0160774
436	0.126576	0.0550854	0.0159228
436.2	0.126894	0.0548201	0.0158339
436.4	0.127213	0.0546129	0.015875
436.6	0.127448	0.0546953	0.0153126
436.8	0.127644	0.0544036	0.0154462
437	0.127846	0.0544835	0.0154893
437.2	0.128103	0.0545101	0.0163439
437.4	0.128993	0.0552591	0.0167218
437.6	0.129393	0.0558815	0.0167212
437.8	0.129878	0.0563301	0.0167565
438	0.130148	0.0572581	0.0172958
438.2	0.129983	0.0574031	0.0173427
438.4	0.129597	0.0570994	0.0175776
438.6	0.129629	0.0572662	0.0179343
438.8	0.129591	0.0570607	0.0173556
439	0.12934	0.0567274	0.0167794
439.2	0.129211	0.0566014	0.0164149
439.4	0.129553	0.0566796	0.0163789
439.6	0.129876	0.0568541	0.0164121
439.8	0.130218	0.0570592	0.0162904
440	0.13029	0.0571414	0.0162668
440.2	0.131028	0.0572284	0.0158617
440.4	0.131174	0.0571193	0.0157002
440.6	0.131532	0.0576823	0.0159232
440.8	0.131561	0.0573868	0.0163982
441	0.131743	0.0577032	0.0167642
441.2	0.131851	0.0584624	0.0173521
441.4	0.132379	0.0590637	0.017461
441.6	0.132117	0.0589136	0.0175106
441.8	0.132061	0.0589462	0.0178476
442	0.131624	0.0590145	0.0178139
442.2	0.131639	0.0590288	0.0178268
442.4	0.131372	0.0585519	0.0176826
442.6	0.13095	0.0579895	0.0171247
442.8	0.130262	0.057566	0.0162729
443	0.13001	0.0572395	0.0161728
443.2	0.130403	0.057519	0.0162023
443.4	0.130678	0.0573013	0.0157316
443.6	0.130174	0.057056	0.0155445
443.8	0.130212	0.0566858	0.0155703
444	0.130128	0.0566091	0.0156167
444.2	0.130366	0.0570932	0.0157363
444.4	0.130243	0.0572576	0.0163378
444.6	0.130005	0.0571264	0.0165326
444.8	0.129517	0.0567001	0.0168654
445	0.129946	0.056834	0.0170984
445.2	0.129955	0.0571213	0.0173576
445.4	0.130019	0.0572251	0.0174237
445.6	0.129798	0.0579462	0.0170681
445.8	0.130617	0.0583764	0.0174434
446	0.130985	0.0592528	0.01753
446.2	0.131578	0.0596049	0.0174509
446.4	0.131464	0.0588187	0.016754
446.6	0.13153	0.0583367	0.016548
446.8	0.13191	0.058769	0.0166472
447	0.132143	0.0591723	0.0169362
447.2	0.132303	0.0590135	0.0166555
447.4	0.132136	0.0583869	0.0162283
447.6	0.131747	0.0582205	0.0164156
447.8	0.132025	0.0581602	0.0168767
448	0.131705	0.0578213	0.0166238
448.2	0.131616	0.0578266	0.0167719
448.4	0.13149	0.0571182	0.0165835
448.6	0.131537	0.057084	0.0163971
448.8	0.131531	0.0573964	0.0167733
449	0.131753	0.0579702	0.0173136
449.2	0.1325	0.0584368	0.0178713
449.4	0.132284	0.0587512	0.0176473
449.6	0.132843	0.0593479	0.0175878
449.8	0.133226	0.0591605	0.017937
450	0.132922	0.0595582	0.0180858
450.2	0.132658	0.0591113	0.0178643
450.4	0.132262	0.058731	0.0174809
450.6	0.132359	0.0591865	0.0176508
450.8	0.132246	0.0592706	0.0176306
451	0.131912	0.0587569	0.0174757
451.2	0.132022	0.0582473	0.0175425
451.4	0.131878	0.0580858	0.0171804
451.6	0.132073	0.0583386	0.0176923
451.8	0.131968	0.0584614	0.0177311
452	0.132188	0.058281	0.0176188
452.2	0.132496	0.0589293	0.0176581
452.4	0.132662	0.0591513	0.017627
452.6	0.133462	0.0604453	0.0181282
452.8	0.133701	0.0609801	0.0186325
453	0.134556	0.0616843	0.0186273
453.2	0.135084	0.0618414	0.0184117
453.4	0.135004	0.0617828	0.0179126
453.6	0.135744	0.0620094	0.0181692
453.8	0.135663	0.0621809	0.0185521
454	0.135764	0.0623472	0.0184241
454.2	0.135458	0.0620272	0.0179859
454.4	0.13547	0.0609215	0.0175999
454.6	0.13538	0.0603024	0.0175917
454.8	0.134934	0.0596054	0.017893
455	0.134352	0.0588119	0.0178488
455.2	0.134112	0.0585612	0.0180391
455.4	0.133558	0.058254	0.0173584
455.6	0.133446	0.0582682	0.0177204
455.8	0.132954	0.0582028	0.0176472
456	0.13339	0.0588286	0.0181056
456.2	0.132842	0.058726	0.0181708
456.4	0.132578	0.0589775	0.0179678
456.6	0.132905	0.0598	0.0184559
456.8	0.133021	0.0596964	0.018217
457	0.133607	0.0598192	0.0179308
457.2	0.133909	0.0602017	0.01836
457.4	0.134825	0.059852	0.0185423
457.6	0.135273	0.0601103	0.0185829
457.8	0.135721	0.0603643	0.0188264
458	0.135983	0.0604656	0.0183249
458.2	0.13571	0.0598309	0.0182895
458.4	0.135826	0.0588697	0.0184386
458.6	0.135467	0.0589841	0.0184719
458.8	0.135078	0.0593389	0.0181363
459	0.134701	0.0593695	0.0177416
459.2	0.134759	0.059202	0.0172771
459.4	0.134891	0.0596628	0.0174316
459.6	0.13507	0.0603689	0.0178645
459.8	0.134969	0.0606597	0.0179752
460	0.13463	0.0609879	0.0178581
460.2	0.133808	0.0608691	0.017297
460.4	0.133736	0.0610955	0.0169128
460.6	0.134155	0.060793	0.0172074
460.8	0.134525	0.0604003	0.0170486
461	0.134794	0.060699	0.0172089
461.2	0.135403	0.0609045	0.0178188
461.4	0.13567	0.0603929	0.0178987
461.6	0.135506	0.060204	0.0178069
461.8	0.136077	0.060481	0.0178151
462	0.135881	0.0606912	0.017846
462.2	0.1359	0.0607029	0.0184851
462.4	0.13565	0.0607942	0.0183361
462.6	0.135329	0.0608451	0.0182852
462.8	0.134763	0.0606541	0.0179128
463	0.135008	0.060731	0.018326
463.2	0.135327	0.060478	0.0183595
463.4	0.135778	0.0611913	0.0187106
463.6	0.135717	0.0614925	0.0185847
463.8	0.1358	0.0615337	0.0183742
464	0.13555	0.0612694	0.0181353
464.2	0.135676	0.0613919	0.0182761
464.4	0.1361	0.0614592	0.0183189
464.6	0.136577	0.0615692	0.0186478
464.8	0.136818	0.0618165	0.0186606
465	0.136687	0.0618084	0.0186986
465.2	0.136498	0.0616038	0.0184778
465.4	0.135833	0.0617609	0.0184762
465.6	0.135582	0.0624002	0.0182225
465.8	0.135919	0.0629868	0.018317
466	0.135341	0.0626969	0.0183571
466.2	0.135245	0.062597	0.0186283
466.4	0.134586	0.0618879	0.0182992
466.6	0.133961	0.0607864	0.0181588
466.8	0.133578	0.0602604	0.0178666
467	0.133922	0.060184	0.0177985
467.2	0.134106	0.0604013	0.0180745
467.4	0.134885	0.060627	0.018072
467.6	0.135224	0.0612091	0.018671
467.8	0.135672	0.0613186	0.0191185
468	0.135822	0.0614603	0.0198808
468.2	0.136318	0.0620045	0.0202585
468.4	0.136864	0.0621341	0.0202416
468.6	0.137251	0.0614399	0.0202561
468.8	0.137074	0.0612178	0.0197342
469	0.136421	0.0609635	0.0193551
469.2	0.136392	0.0612974	0.0190218
469.4	0.13647	0.061679	0.0188745
469.6	0.136701	0.0617376	0.0186847
469.8	0.137163	0.0616295	0.0184466
470	0.13672	0.0611458	0.0178381
470.2	0.136627	0.0610564	0.0175936
470.4	0.136567	0.0609333	0.0174772
470.6	0.136426	0.0606974	0.0170469
470.8	0.136583	0.0608228	0.0170059
471	0.137071	0.0608964	0.0171029
471.2	0.137794	0.061497	0.0175595
471.4	0.138167	0.0609654	0.0175432
471.6	0.137926	0.0607355	0.0177865
471.8	0.138171	0.0606114	0.0183903
472	0.13818	0.0609305	0.0193766
472.2	0.138317	0.060608	0.0189382
472.4	0.138499	0.0606943	0.0195361
472.6	0.138168	0.0601085	0.0193421
472.8	0.138013	0.0606411	0.0190537
473	0.137906	0.0611361	0.0188089
473.2	0.137784	0.0611286	0.0183966
473.4	0.137741	0.0616585	0.0183992
473.6	0.13719	0.0618032	0.0184524
473.8	0.136974	0.0622207	0.0179583
474	0.136399	0.0619054	0.0177084
474.2	0.136249	0.0620106	0.0174318
474.4	0.136287	0.0617742	0.0174751
474.6	0.136622	0.061795	0.0177376
474.8	0.136852	0.0616194	0.0177763
475	0.13711	0.0614282	0.0180413
475.2	0.137586	0.0615999	0.0183636
475.4	0.137334	0.0608359	0.0184834
475.6	0.137204	0.0607719	0.0184922
475.8	0.137341	0.0614177	0.0189134
476	0.137485	0.0613497	0.0188763
476.2	0.137928	0.0615648	0.0186101
476.4	0.137897	0.0620081	0.0191912
476.6	0.137982	0.061638	0.0181081
476.8	0.138964	0.0628483	0.0183729
477	0.138951	0.0625658	0.0176811
477.2	0.138929	0.0625248	0.0179427
477.4	0.139498	0.0627721	0.0184802
477.6	0.139536	0.0628886	0.0190047
477.8	0.139317	0.0628974	0.0186385
478	0.139594	0.0627758	0.0185767
478.2	0.139322	0.0624604	0.0183259
478.4	0.139396	0.0620822	0.0185249
478.6	0.139133	0.0620147	0.0188689
478.8	0.138466	0.0620172	0.0183962
479	0.138055	0.062082	0.0189269
479.2	0.138406	0.0626024	0.0192833
479.4	0.138095	0.0625233	0.0194399
479.6	0.138234	0.0626963	0.0192205
479.8	0.138179	0.0630851	0.0191741
480	0.138224	0.0627593	0.0188823
480.2	0.138168	0.0631433	0.0191345
480.4	0.137747	0.0633473	0.0188606
480.6	0.13777	0.0631815	0.0188349
480.8	0.138509	0.0635776	0.0192644
481	0.138562	0.0628538	0.0192537
481.2	0.13854	0.0629368	0.019942
481.4	0.139106	0.0625586	0.0201028
481.6	0.139207	0.063145	0.0200139
481.8	0.138657	0.0628116	0.0192525
482	0.13887	0.0626839	0.0190442
482.2	0.138157	0.061867	0.0183232
482.4	0.137917	0.0615139	0.0180037
482.6	0.137538	0.0616351	0.0178196
482.8	0.137745	0.06239	0.018004
483	0.138409	0.0628906	0.0188921
483.2	0.138573	0.0629843	0.0189316
483.4	0.138939	0.0631985	0.0189581
483.6	0.138988	0.0634268	0.0188279
483.8	0.139076	0.0636772	0.0188832
484	0.138872	0.0637624	0.0190031
484.2	0.138236	0.064001	0.0191367
484.4	0.138268	0.0640096	0.0190722
484.6	0.138256	0.0634685	0.0193121
484.8	0.138662	0.06371	0.0191172
485	0.138856	0.0633303	0.0193093
485.2	0.138521	0.062902	0.0187149
485.4	0.139048	0.0630727	0.0185089
485.6	0.139267	0.0635209	0.018279
485.8	0.138971	0.0630497	0.0181976
486	0.139514	0.06322	0.0181076
486.2	0.139345	0.0633184	0.0181498
486.4	0.139527	0.0633223	0.0180811
486.6	0.139483	0.0638344	0.018343
486.8	0.139646	0.0639903	0.0188839
487	0.139574	0.0641857	0.0191099
487.2	0.138701	0.0635639	0.018941
487.4	0.13915	0.0638492	0.0191831
487.6	0.138564	0.0635953	0.0193882
487.8	0.138878	0.0636319	0.0193212
488	0.138198	0.0636601	0.0195688
488.2	0.137402	0.0631286	0.0187412
488.4	0.138162	0.0628576	0.0185877
488.6	0.137874	0.0627234	0.0182181
488.8	0.13823	0.0626383	0.0181273
489	0.138839	0.0621578	0.0178173
489.2	0.138924	0.0624905	0.0173632
489.4	0.139452	0.0627786	0.0175497
489.6	0.140661	0.0637042	0.0181281
489.8	0.14129	0.0643846	0.018683
490	0.141986	0.065165	0.0190413
490.2	0.141951	0.0654251	0.0195177
490.4	0.14218	0.0654332	0.0193648
490.6	0.141774	0.0655659	0.0196246
490.8	0.141775	0.0656047	0.0197823
491	0.14126	0.0659803	0.0199071
491.2	0.140971	0.0662068	0.02
491.4	0.141028	0.0661985	0.0196699
491.6	0.140357	0.0662232	0.0197235
491.8	0.140115	0.0658562	0.0193515
492	0.139421	0.0657627	0.0192466
492.2	0.139512	0.0657192	0.0190025
492.4	0.139698	0.0657151	0.0191395
492.6	0.139201	0.0655155	0.0190853
492.8	0.139429	0.0652803	0.0189983
493	0.139173	0.0651564	0.0186485
493.2	0.13908	0.0653284	0.0189323
493.4	0.139285	0.0652446	0.0193903
493.6	0.140059	0.0656166	0.0196256
493.8	0.139997	0.0657645	0.0197252
494	0.140097	0.065724	0.019771
494.2	0.140051	0.0656796	0.0196234
494.4	0.140134	0.0658312	0.0194547
494.6	0.139867	0.0657583	0.0191671
494.8	0.140507	0.0662692	0.0194528
495	0.140361	0.0662555	0.0189738
495.2	0.140531	0.0662984	0.0186689
495.4	0.140984	0.0658905	0.0184743
495.6	0.141296	0.0663264	0.0188195
495.8	0.141139	0.0662192	0.0188144
496	0.141908	0.0673893	0.019628
496.2	0.141748	0.0678403	0.0194661
496.4	0.141518	0.0679299	0.0193026
496.6	0.141888	0.0678334	0.01945
496.8	0.142428	0.0682074	0.0195972
497	0.142699	0.0682323	0.019548
497.2	0.142745	0.0677488	0.0197497
497.4	0.14277	0.0672046	0.0194237
497.6	0.143059	0.067089	0.019447
497.8	0.143379	0.0675345	0.0198634
498	0.143602	0.0672926	0.0199668
498.2	0.143238	0.0666968	0.0197044
498.4	0.143283	0.0660255	0.0198914
498.6	0.143267	0.0656629	0.0196867
498.8	0.143232	0.0654093	0.0200662
499	0.142637	0.0647328	0.0196466
499.2	0.141956	0.064076	0.0199338
499.4	0.142136	0.0639412	0.0199449
499.6	0.141515	0.0637201	0.0199406
499.8	0.140857	0.0636148	0.0200332
500	0.14108	0.0638196	0.0200844
500.2	0.140077	0.0636991	0.0192394
500.4	0.140481	0.063771	0.0191817
500.6	0.141163	0.0643193	0.0195735
500.8	0.141219	0.0646679	0.0191827
501	0.14151	0.065105	0.0190393
501.2	0.14128	0.06518	0.0193078
501.4	0.141675	0.066161	0.0195677
501.6	0.142187	0.0669457	0.0200188
501.8	0.142724	0.0675005	0.0202721
502	0.143034	0.0673304	0.0204152
502.2	0.142698	0.0670197	0.0200245
502.4	0.143151	0.0670576	0.0200723
502.6	0.143266	0.0676729	0.0205158
502.8	0.143074	0.0678683	0.0207656
503	0.142711	0.0677356	0.0202988
503.2	0.142419	0.067195	0.0199336
503.4	0.142589	0.0669682	0.0195821
503.6	0.142631	0.0667921	0.0197508
503.8	0.142071	0.0666128	0.0192074
504	0.141666	0.0662589	0.0186988
504.2	0.140476	0.0658156	0.0184795
504.4	0.140702	0.0657361	0.018745
504.6	0.140689	0.065679	0.019076
504.8	0.140318	0.0656258	0.0188335
505	0.140897	0.0664211	0.0194414
505.2	0.140446	0.0666606	0.0191372
505.4	0.14063	0.0671556	0.0191641
505.6	0.140987	0.0669905	0.019155
505.8	0.141401	0.0676265	0.0196734
506	0.14142	0.0674956	0.0199786
506.2	0.141834	0.0683636	0.0203451
506.4	0.142476	0.0690627	0.0209985
506.6	0.143	0.0697061	0.0215414
506.8	0.143628	0.0699444	0.0215302
507	0.14416	0.0704995	0.0219571
507.2	0.14416	0.0700979	0.0219578
507.4	0.144233	0.0700717	0.0222825
507.6	0.144627	0.0697377	0.0221692
507.8	0.144421	0.0691565	0.0220379
508	0.144507	0.0688105	0.0221021
508.2	0.144618	0.0685732	0.0225332
508.4	0.144671	0.0682428	0.0221467
508.6	0.144444	0.067757	0.0215436
508.8	0.144173	0.0670663	0.0211238
509	0.144365	0.06686	0.0207642
509.2	0.143728	0.0665057	0.0197991
509.4	0.144106	0.067038	0.0202641
509.6	0.14436	0.0673557	0.0202929
509.8	0.144089	0.0675184	0.0206762
510	0.143585	0.0670823	0.0204009
510.2	0.143789	0.0678047	0.020357
510.4	0.143758	0.0677393	0.0207072
510.6	0.143865	0.0676932	0.0205686
510.8	0.143576	0.0672374	0.0206671
511	0.143115	0.0674	0.0207197
511.2	0.142373	0.0668127	0.0203124
511.4	0.142642	0.0668578	0.0201822
511.6	0.142742	0.0665539	0.0200467
511.8	0.143135	0.0670097	0.0204853
512	0.142857	0.0667786	0.020747
512.2	0.142739	0.0666843	0.0208055
512.4	0.142244	0.0662909	0.0201867
512.6	0.142706	0.0665775	0.0206164
512.8	0.143652	0.0667338	0.0211755
513	0.144104	0.0678564	0.0215894
513.2	0.144298	0.068384	0.0219808
513.4	0.144144	0.0688525	0.0223925
513.6	0.144433	0.0690688	0.0230831
513.8	0.144305	0.0684823	0.0232292
514	0.14429	0.0687889	0.0229397
514.2	0.144446	0.0690125	0.0232781
514.4	0.144996	0.0692463	0.0234639
514.6	0.144842	0.0691878	0.0226864
514.8	0.144436	0.0688381	0.0222379
515	0.144258	0.0686602	0.0220419
515.2	0.143873	0.0678808	0.0216967
515.4	0.14389	0.0673391	0.0207572
515.6	0.144007	0.0669022	0.0208948
515.8	0.144243	0.0663498	0.0206239
516	0.143925	0.0657051	0.0204277
516.2	0.144103	0.0656242	0.0198176
516.4	0.144252	0.0657219	0.0194223
516.6	0.145308	0.0665389	0.0199758
516.8	0.145644	0.0666927	0.0199876
517	0.145359	0.0672174	0.0198947
517.2	0.145887	0.0680307	0.0203951
517.4	0.145952	0.0685887	0.0203719
517.6	0.14703	0.0691624	0.021019
517.8	0.147099	0.0699329	0.0210731
518	0.146955	0.0702917	0.0208505
518.2	0.14691	0.0706945	0.0208391
518.4	0.147154	0.0716748	0.0213768
518.6	0.146655	0.0709045	0.0210308
518.8	0.145989	0.0703773	0.0206693
519	0.146435	0.0700559	0.020996
519.2	0.146283	0.0699409	0.0211215
519.4	0.146342	0.0699038	0.0209501
519.6	0.146716	0.0694542	0.021153
519.8	0.146841	0.0685551	0.0208949
520	0.146718	0.06831	0.02106
520.2	0.145905	0.0675593	0.0204858
520.4	0.14581	0.0675928	0.0203691
520.6	0.146099	0.0670675	0.0203893
520.8	0.145697	0.0666379	0.0197931
521	0.145971	0.0667764	0.019631
521.2	0.146264	0.0670547	0.0194915
521.4	0.145853	0.0665463	0.0190306
521.6	0.146127	0.067033	0.0190812
521.8	0.145576	0.0677666	0.0188278
522	0.145224	0.06746	0.0182847
522.2	0.144726	0.067756	0.0179712
522.4	0.144584	0.0677084	0.0181723
522.6	0.144519	0.0670156	0.0177908
522.8	0.144779	0.0677326	0.0182015
523	0.145692	0.0680371	0.0194879
523.2	0.145384	0.0684228	0.0202975
523.4	0.145557	0.068009	0.0204647
523.6	0.14609	0.0682729	0.0211955
523.8	0.145888	0.0681795	0.021559
524	0.145583	0.0683078	0.0217087
524.2	0.145365	0.0685067	0.0216495
524.4	0.145818	0.0691009	0.0221931
524.6	0.145707	0.0691892	0.0220634
524.8	0.145977	0.0697664	0.022111
525	0.146305	0.0699027	0.0219863
525.2	0.146538	0.0702906	0.0216039
525.4	0.146571	0.0705183	0.0214063
525.6	0.147108	0.0710923	0.0212234
525.8	0.146947	0.0709695	0.0210442
526	0.146544	0.0707468	0.021121
526.2	0.146414	0.0703757	0.0207949
526.4	0.146053	0.0702601	0.020975
526.6	0.146423	0.0700952	0.0218696
526.8	0.146924	0.069655	0.0223738
527	0.146972	0.0690574	0.0226483
527.2	0.14667	0.0685379	0.022865
527.4	0.146507	0.0683383	0.0227998
527.6	0.146757	0.0688568	0.0230896
527.8	0.146352	0.0687111	0.0228026
528	0.146366	0.0687566	0.0230391
528.2	0.146138	0.0692204	0.0229951
528.4	0.146169	0.0692642	0.0229528
528.6	0.145844	0.0695894	0.022667
528.8	0.146128	0.0696472	0.022155
529	0.146082	0.0692917	0.0217895
529.2	0.145796	0.0691482	0.0214201
529.4	0.145957	0.0694716	0.021467
529.6	0.1458	0.0690313	0.021514
529.8	0.145685	0.0690719	0.0213444
530	0.145725	0.0695853	0.0218021
530.2	0.146023	0.0697963	0.0214899
530.4	0.146181	0.0699158	0.0211643
530.6	0.147138	0.0700499	0.0215442
530.8	0.14729	0.0699944	0.0212151
531	0.147051	0.0704579	0.0210628
531.2	0.147138	0.0704733	0.0211558
531.4	0.146972	0.0715024	0.0212891
531.6	0.146782	0.0715729	0.0214682
531.8	0.146187	0.0712903	0.0217843
532	0.146287	0.0708283	0.0219091
532.2	0.146282	0.0706408	0.0218889
532.4	0.146168	0.070485	0.0221666
532.6	0.146092	0.0703478	0.0223225
532.8	0.1455	0.0698208	0.021856
533	0.145045	0.0690585	0.0220045
533.2	0.144812	0.0690054	0.0216787
533.4	0.14491	0.0687731	0.0214261
533.6	0.144462	0.0680281	0.0212794
533.8	0.144595	0.0677063	0.0205675
534	0.144637	0.0673844	0.0203033
534.2	0.144347	0.0671571	0.0193951
534.4	0.144298	0.0669346	0.0189704
534.6	0.143964	0.0670406	0.018582
534.8	0.143764	0.0672821	0.0187786
535	0.144033	0.0673893	0.0188627
535.2	0.144226	0.0672697	0.0188763
535.4	0.143936	0.0678447	0.0194111
535.6	0.143995	0.0674374	0.0193569
535.8	0.144267	0.0670542	0.0196452
536	0.14483	0.0668459	0.0197269
536.2	0.145235	0.0673593	0.019994
536.4	0.145371	0.0676051	0.020264
536.6	0.146263	0.068211	0.0209137
536.8	0.146412	0.0686427	0.0212503
537	0.147057	0.0687239	0.0217672
537.2	0.147926	0.0693041	0.0218334
537.4	0.148464	0.0695708	0.0220821
537.6	0.148244	0.0695281	0.0219404
537.8	0.148592	0.0690688	0.0214566
538	0.148212	0.06936	0.021351
538.2	0.148058	0.0699118	0.0215736
538.4	0.148096	0.0699108	0.0218426
538.6	0.148235	0.0703117	0.02169
538.8	0.148713	0.0705543	0.0223825
539	0.14862	0.0704684	0.022096
539.2	0.148049	0.0704724	0.0219558
539.4	0.147439	0.07041	0.0218788
539.6	0.14693	0.069637	0.0213164
539.8	0.146891	0.0699156	0.0214786
540	0.14635	0.0694465	0.0208829
540.2	0.146426	0.0698342	0.0208163
540.4	0.146479	0.0702156	0.020831
540.6	0.147025	0.0705597	0.0212859
540.8	0.146832	0.0703187	0.0215051
541	0.146983	0.0702024	0.0214139
541.2	0.147717	0.0707158	0.0214807
541.4	0.147401	0.070661	0.0215032
541.6	0.147364	0.0704587	0.0209224
541.8	0.147881	0.0707157	0.0210367
542	0.147641	0.0710439	0.0208399
542.2	0.14774	0.0710893	0.0212396
542.4	0.147976	0.0708549	0.0212134
542.6	0.148238	0.0708567	0.0209973
542.8	0.148808	0.0706319	0.021195
543	0.14839	0.0704871	0.0208711
543.2	0.148282	0.0705122	0.0207778
543.4	0.148417	0.0704113	0.0210337
543.6	0.148365	0.0705569	0.0209587
543.8	0.148865	0.0707828	0.020909
544	0.148611	0.0703718	0.020666
544.2	0.149148	0.0710867	0.0210716
544.4	0.149237	0.0718576	0.0216085
544.6	0.149422	0.0717332	0.0218398
544.8	0.149205	0.0721113	0.0224214
545	0.149789	0.0723582	0.0229222
545.2	0.150068	0.0731266	0.0234605
545.4	0.150108	0.0733261	0.0237777
545.6	0.150542	0.0734622	0.0237543
545.8	0.149972	0.0735177	0.0236766
546	0.149671	0.0736117	0.0236564
546.2	0.148834	0.0733015	0.0235923
546.4	0.148567	0.0726229	0.0228779
546.6	0.148327	0.072247	0.0225696
546.8	0.148668	0.0729137	0.0229596
547	0.148422	0.0732117	0.0230248
547.2	0.148667	0.0734506	0.0230321
547.4	0.148545	0.0729276	0.0225785
547.6	0.148459	0.0732112	0.0224077
547.8	0.148173	0.0726251	0.0216704
548	0.148232	0.0731318	0.0225548
548.2	0.148001	0.0731004	0.0221508
548.4	0.148309	0.0735205	0.0222761
548.6	0.148334	0.0733094	0.02184
548.8	0.148441	0.0733114	0.0227395
549	0.148823	0.0735411	0.0229526
549.2	0.149018	0.0735671	0.0229984
549.4	0.149438	0.0735304	0.0228409
549.6	0.149487	0.0733514	0.0222872
549.8	0.14906	0.0730534	0.0217535
550	0.149366	0.072833	0.0217241
550.2	0.148977	0.0723475	0.021582
550.4	0.149107	0.07167	0.0214149
550.6	0.148963	0.0716527	0.021664
550.8	0.149409	0.0721091	0.0220962
551	0.149365	0.0718194	0.0222516
551.2	0.14947	0.0714221	0.0223098
551.4	0.149537	0.0711724	0.0221582
551.6	0.149513	0.0714604	0.0224297
551.8	0.149155	0.0712536	0.0224423
552	0.149459	0.0715937	0.0226083
552.2	0.14983	0.0715723	0.0221411
552.4	0.150187	0.0721211	0.0223604
552.6	0.149895	0.072288	0.0222991
552.8	0.149816	0.0727067	0.0223989
553	0.149786	0.0728705	0.0218042
553.2	0.150158	0.0730911	0.0218602
553.4	0.150378	0.073617	0.0217511
553.6	0.150269	0.0727865	0.0215764
553.8	0.150192	0.0731768	0.0219224
554	0.15048	0.0735404	0.0222372
554.2	0.150156	0.0736564	0.0224535
554.4	0.14982	0.0736388	0.0222103
554.6	0.149302	0.0737346	0.021905
554.8	0.149688	0.0741445	0.0221784
555	0.149726	0.0745747	0.0226816
555.2	0.149788	0.0739584	0.0223585
555.4	0.149948	0.0736706	0.0219527
555.6	0.149357	0.0730195	0.0218652
555.8	0.149865	0.0732021	0.0220251
556	0.149994	0.0729778	0.0214718
556.2	0.15045	0.0729195	0.021614
556.4	0.150283	0.0729313	0.0213277
556.6	0.150278	0.0729639	0.020824
556.8	0.150131	0.0723418	0.0205622
557	0.149908	0.0715259	0.020194
557.2	0.150437	0.0715146	0.0208912
557.4	0.150019	0.0716296	0.0212019
557.6	0.150119	0.071261	0.0215213
557.8	0.149615	0.0719042	0.0216141
558	0.14985	0.072462	0.0215828
558.2	0.149699	0.072887	0.0218042
558.4	0.149626	0.0734715	0.022203
558.6	0.14972	0.0736556	0.0223047
558.8	0.150257	0.0741411	0.0230543
559	0.149965	0.0738455	0.0233044
559.2	0.149864	0.0723753	0.0229062
559.4	0.150164	0.0720118	0.0231721
559.6	0.150208	0.0724488	0.0238341
559.8	0.150751	0.0728826	0.0241254
560	0.150502	0.0721988	0.0239712
560.2	0.150842	0.0719954	0.0236786
560.4	0.151049	0.0716303	0.0234879
560.6	0.151102	0.0714663	0.0231176
560.8	0.151125	0.0708637	0.0232135
561	0.15054	0.0705476	0.0228367
561.2	0.150956	0.0706322	0.0232832
561.4	0.150125	0.0708574	0.0228736
561.6	0.15082	0.0708436	0.0229609
561.8	0.150432	0.0707528	0.0222303
562	0.151029	0.0717848	0.0222324
562.2	0.151126	0.071728	0.0225536
562.4	0.150898	0.0720508	0.0229395
562.6	0.151219	0.0719471	0.0225722
562.8	0.151448	0.0718706	0.0224925
563	0.151362	0.0717314	0.0223341
563.2	0.152001	0.0717365	0.0220245
563.4	0.152048	0.0724745	0.0219142
563.6	0.151762	0.0732576	0.0221618
563.8	0.151747	0.0733149	0.0219354
564	0.151743	0.073468	0.0216217
564.2	0.151502	0.0737599	0.021248
564.4	0.151418	0.0740249	0.0213953
564.6	0.151311	0.0739654	0.0216976
564.8	0.151705	0.0742931	0.0228791
565	0.151375	0.0737957	0.0228524
565.2	0.151532	0.0737321	0.0232464
565.4	0.151767	0.0735226	0.0231101
565.6	0.152758	0.0732706	0.0236539
565.8	0.152679	0.0728349	0.0231035
566	0.152615	0.0728757	0.0228165
566.2	0.152444	0.0724608	0.0232014
566.4	0.152272	0.0725882	0.0231876
566.6	0.1525	0.0724121	0.0228935
566.8	0.152858	0.0726972	0.0228054
567	0.153323	0.073166	0.0230578
567.2	0.153544	0.0732879	0.0228383
567.4	0.15277	0.0731429	0.0224671
567.6	0.152366	0.0735723	0.0226906
567.8	0.151901	0.0734022	0.0223146
568	0.151424	0.0729652	0.0219657
568.2	0.150824	0.0724972	0.0219347
568.4	0.151013	0.0725052	0.0227211
568.6	0.15093	0.0722754	0.0229698
568.8	0.15084	0.0726937	0.0236962
569	0.150311	0.0719579	0.023195
569.2	0.150011	0.0716908	0.0231961
569.4	0.149819	0.0710974	0.022842
569.6	0.149675	0.0710327	0.0230185
569.8	0.149393	0.0712721	0.0227147
570	0.149285	0.0714854	0.0226088
570.2	0.149484	0.0716311	0.0229023
570.4	0.149806	0.0720513	0.0230117
570.6	0.150196	0.072374	0.0227991
570.8	0.15079	0.0729445	0.0227467
571	0.150988	0.0729069	0.0227635
571.2	0.150842	0.0727198	0.0221755
571.4	0.150849	0.0728036	0.0218433
571.6	0.150585	0.072436	0.0216978
571.8	0.150902	0.0721519	0.021446
572	0.15143	0.0722943	0.0216192
572.2	0.151382	0.0722238	0.0216075
572.4	0.1517	0.0724219	0.0219173
572.6	0.151517	0.0726318	0.0217702
572.8	0.151697	0.0730355	0.0224491
573	0.151814	0.0726031	0.0222362
573.2	0.151353	0.0722107	0.0222946
573.4	0.151028	0.072087	0.0219636
573.6	0.151216	0.072297	0.0221201
573.8	0.151379	0.0720811	0.0222151
574	0.151431	0.0720166	0.0219703
574.2	0.151393	0.0719309	0.0220809
574.4	0.151002	0.0718718	0.0219696
574.6	0.150661	0.0715941	0.021203
574.8	0.150643	0.0715713	0.0212363
575	0.1505	0.0710237	0.021123
575.2	0.150841	0.0710455	0.0210448
575.4	0.151082	0.0713598	0.0210328
575.6	0.151024	0.0715582	0.0212707
575.8	0.151527	0.0720542	0.0215232
576	0.152122	0.0725261	0.0221006
576.2	0.152241	0.072972	0.0222612
576.4	0.152332	0.0731893	0.0228334
576.6	0.152854	0.0736098	0.0233293
576.8	0.152606	0.073324	0.0233984
577	0.152418	0.0726012	0.0230454
577.2	0.152265	0.0723731	0.0231971
577.4	0.152273	0.0724463	0.02296
577.6	0.152117	0.0722775	0.0229986
577.8	0.151797	0.0717565	0.0225287
578	0.151231	0.071718	0.0219572
578.2	0.15155	0.0718939	0.0220893
578.4	0.150763	0.0716439	0.0216889
578.6	0.150244	0.0712276	0.0212733
578.8	0.150473	0.0713097	0.0211597
579	0.151113	0.0715893	0.0211987
579.2	0.151958	0.0722506	0.0213553
579.4	0.151997	0.0730191	0.0211952
579.6	0.151771	0.0732996	0.0215198
579.8	0.151586	0.0730001	0.0213654
580	0.152358	0.0736364	0.0217158
580.2	0.152252	0.0743378	0.0216023
580.4	0.152036	0.0744063	0.0219453
580.6	0.152567	0.0746213	0.0222474
580.8	0.151924	0.0743908	0.0220133
581	0.152122	0.0742891	0.0222947
581.2	0.152462	0.074305	0.0222997
581.4	0.152424	0.0742149	0.0221784
581.6	0.152746	0.0743441	0.0221495
581.8	0.152778	0.0741018	0.0219896
582	0.153193	0.0744113	0.0223382
582.2	0.153677	0.0746703	0.0228547
582.4	0.153012	0.0743329	0.0233951
582.6	0.153206	0.0742972	0.0232602
582.8	0.153919	0.0747449	0.0234277
583	0.154216	0.074916	0.0238026
583.2	0.154396	0.0752323	0.0239362
583.4	0.153954	0.0747482	0.0238467
583.6	0.153839	0.0743461	0.0240184
583.8	0.153846	0.0742417	0.0237285
584	0.15457	0.0743657	0.0238672
584.2	0.154318	0.0750127	0.0241216
584.4	0.15411	0.0747778	0.0241197
584.6	0.154134	0.0742447	0.0240439
584.8	0.153832	0.0743537	0.0233179
585	0.153932	0.0742008	0.0231886
585.2	0.154515	0.0747178	0.0232242
585.4	0.154405	0.0747225	0.0234576
585.6	0.15461	0.0749934	0.0236682
585.8	0.15405	0.0745359	0.0234212
586	0.154183	0.0748425	0.0235433
586.2	0.154092	0.075064	0.0234974
586.4	0.153852	0.0751182	0.023601
586.6	0.15358	0.0755526	0.0229844
586.8	0.153342	0.0757669	0.023037
587	0.153547	0.0756387	0.0226834
587.2	0.154116	0.0751848	0.0227093
587.4	0.154428	0.0746728	0.022878
587.6	0.154717	0.0739882	0.0226992
587.8	0.154483	0.073459	0.0224608
588	0.154762	0.0727789	0.0221615
588.2	0.154517	0.0729502	0.0223026
588.4	0.154388	0.0723061	0.0217892
588.6	0.153912	0.0721721	0.0212844
588.8	0.15347	0.072568	0.0208449
589	0.153529	0.0726602	0.0216575
589.2	0.153387	0.0730746	0.0220622
589.4	0.152925	0.0729949	0.0224746
589.6	0.15287	0.0731052	0.0228535
589.8	0.152565	0.0731493	0.0226274
590	0.152978	0.073672	0.0231885
590.2	0.152726	0.073901	0.0230224
590.4	0.152724	0.0742967	0.0234206
590.6	0.152662	0.0745329	0.0232762
590.8	0.153146	0.074722	0.0235415
591	0.153391	0.074666	0.0235258
591.2	0.153416	0.0746063	0.0236802
591.4	0.153392	0.0742279	0.023748
591.6	0.153619	0.0740026	0.0236945
591.8	0.153564	0.07407	0.0235997
592	0.154101	0.0743437	0.023534
592.2	0.153892	0.0746342	0.023648
592.4	0.153564	0.0746938	0.023157
592.6	0.152628	0.0746303	0.0227472
592.8	0.152242	0.07416	0.0228443
593	0.152727	0.0744332	0.0232623
593.2	0.152453	0.0748195	0.022838
593.4	0.152249	0.0747891	0.0227146
593.6	0.151932	0.0745971	0.0225331
593.8	0.151886	0.0745159	0.022371
594	0.151586	0.0743603	0.022702
594.2	0.151124	0.0739208	0.0220453
594.4	0.151213	0.0739334	0.0220664
594.6	0.151293	0.0733964	0.0215385
594.8	0.151222	0.0736308	0.0214551
595	0.151453	0.0739738	0.0214916
595.2	0.152131	0.0739297	0.0216549
595.4	0.152922	0.0737296	0.0218844
595.6	0.153977	0.0747525	0.0223069
595.8	0.154334	0.0745737	0.0221955
596	0.155127	0.0751337	0.0228013
596.2	0.155413	0.075043	0.0229033
596.4	0.155714	0.0749484	0.0226567
596.6	0.155488	0.0748079	0.0224501
596.8	0.155775	0.0747807	0.0222208
597	0.156024	0.0751464	0.0221035
597.2	0.155577	0.0748612	0.0217006
597.4	0.155178	0.0746659	0.0218957
597.6	0.15453	0.0743421	0.0218566
597.8	0.154718	0.0741895	0.0218179
598	0.154033	0.0740092	0.0219064
598.2	0.153762	0.0737187	0.0218951
598.4	0.153266	0.0735123	0.0218432
598.6	0.15336	0.0732644	0.0218055
598.8	0.153651	0.074107	0.0225328
599	0.154119	0.0742485	0.0227106
599.2	0.153874	0.0742293	0.0227499
599.4	0.154042	0.0746278	0.0232716
599.6	0.154208	0.0748417	0.023838
599.8	0.153915	0.0745366	0.0233628
600	0.154154	0.0750472	0.0235243
600.2	0.153644	0.0750439	0.0230413
600.4	0.153382	0.0750385	0.0224587
600.6	0.153335	0.0752384	0.0220274
600.8	0.153111	0.0750144	0.0218467
601	0.153092	0.0747975	0.0219109
601.2	0.153303	0.0746801	0.022008
601.4	0.153405	0.0749414	0.0223132
601.6	0.153534	0.074993	0.0219496
601.8	0.15386	0.0752863	0.0223638
602	0.15364	0.075142	0.0229865
602.2	0.154017	0.0754174	0.0235604
602.4	0.154135	0.0753596	0.0237371
602.6	0.154565	0.0755625	0.0239576
602.8	0.155571	0.0760511	0.0248286
603	0.155334	0.0759998	0.024406
603.2	0.155434	0.0760489	0.0249017
603.4	0.155695	0.0757233	0.0252364
603.6	0.155688	0.0756831	0.0251092
603.8	0.155519	0.0759219	0.0244283
604	0.155163	0.0762424	0.024611
604.2	0.154934	0.0758543	0.0241331
604.4	0.154747	0.0751755	0.0235745
604.6	0.154689	0.0751455	0.023563
604.8	0.154008	0.0748624	0.0236998
605	0.153408	0.0748099	0.0237563
605.2	0.153183	0.0747141	0.0235068
605.4	0.152966	0.0743104	0.0235003
605.6	0.152745	0.0741159	0.0233575
605.8	0.152307	0.0741521	0.0233152
606	0.152329	0.0738252	0.0233801
606.2	0.152902	0.0740466	0.0233402
606.4	0.153336	0.0743715	0.0234305
606.6	0.153851	0.0750612	0.0239797
606.8	0.154878	0.0755781	0.0242936
607	0.155193	0.0762121	0.0244234
607.2	0.155916	0.0762945	0.0246925
607.4	0.156589	0.0763095	0.0245318
607.6	0.157129	0.076963	0.0244606
607.8	0.157334	0.0769559	0.0243445
608	0.157132	0.07703	0.024123
608.2	0.157575	0.077016	0.0238851
608.4	0.157286	0.0769567	0.0240226
608.6	0.157284	0.0771676	0.0245484
608.8	0.156495	0.0769601	0.0243723
609	0.155894	0.0765231	0.0241177
609.2	0.156138	0.0766792	0.024062
609.4	0.155788	0.0762686	0.0243342
609.6	0.15533	0.0763904	0.024391
609.8	0.155327	0.0763502	0.0249079
610	0.15523	0.0758809	0.0250924
610.2	0.155598	0.0757904	0.0250106
610.4	0.155841	0.0764822	0.0256657
610.6	0.155569	0.076588	0.025895
610.8	0.155748	0.0766693	0.0258282
611	0.156135	0.0768458	0.0262142
611.2	0.155993	0.0766115	0.0258755
611.4	0.155708	0.0763728	0.0253821
611.6	0.15533	0.0763964	0.0248825
611.8	0.154971	0.0760939	0.0242951
612	0.155061	0.0766211	0.0239402
612.2	0.155042	0.0766362	0.0236237
612.4	0.155047	0.0765451	0.0235928
612.6	0.1553	0.0761427	0.0229611
612.8	0.15521	0.0762664	0.0227471
613	0.15492	0.0761121	0.022371
613.2	0.155069	0.0764101	0.0222871
613.4	0.154671	0.0763251	0.0224295
613.6	0.154813	0.076382	0.0224008
613.8	0.155302	0.0762611	0.0228627
614	0.155187	0.0759221	0.0227181
614.2	0.155265	0.0757207	0.0226367
614.4	0.15527	0.075441	0.0226246
614.6	0.155139	0.0752774	0.0227881
614.8	0.154987	0.0754353	0.0233222
615	0.155195	0.0752645	0.0231279
615.2	0.155523	0.0756308	0.0232039
615.4	0.15542	0.0754868	0.0232559
615.6	0.155561	0.0756171	0.0232637
615.8	0.155145	0.0752727	0.023041
616	0.155249	0.0755961	0.0232276
616.2	0.155083	0.0751096	0.0228783
616.4	0.155535	0.0751185	0.0231316
616.6	0.155554	0.0752111	0.0233028
616.8	0.155507	0.0759235	0.0242555
617	0.15531	0.0759538	0.0241114
617.2	0.155269	0.0765206	0.0244168
617.4	0.155319	0.0773252	0.0249334
617.6	0.155605	0.0778704	0.0250694
617.8	0.155698	0.0781305	0.0254782
618	0.155469	0.0784182	0.0255308
618.2	0.155758	0.0785896	0.025221
618.4	0.156379	0.0789878	0.0251075
618.6	0.156638	0.079599	0.0254592
618.8	0.157012	0.0800882	0.0254124
619	0.157998	0.0804113	0.0252825
619.2	0.15846	0.0805907	0.0255566
619.4	0.158097	0.0801149	0.0251093
619.6	0.158212	0.0799191	0.0251136
619.8	0.158657	0.0799139	0.0251442
620	0.159049	0.079833	0.024788
620.2	0.158986	0.0794962	0.0246642
620.4	0.158734	0.0791009	0.0247507
620.6	0.159037	0.0794312	0.0254559
620.8	0.159037	0.0786255	0.0255068
621	0.158748	0.078337	0.0253865
621.2	0.158372	0.0783579	0.025966
621.4	0.15843	0.0786224	0.0264459
621.6	0.158087	0.0781076	0.0264464
621.8	0.158147	0.0782369	0.0263769
622	0.158344	0.0783288	0.0261852
622.2	0.158153	0.0778505	0.0256529
622.4	0.157968	0.0777427	0.0255543
622.6	0.157691	0.0777991	0.025347
622.8	0.157257	0.0774502	0.0249773
623	0.156486	0.0771817	0.0247653
623.2	0.156139	0.0769939	0.0243928
623.4	0.156242	0.0773692	0.0242915
623.6	0.156263	0.0777757	0.0244424
623.8	0.156444	0.0780733	0.0238863
624	0.15612	0.0778636	0.02336
624.2	0.156097	0.0775242	0.02326
624.4	0.15586	0.0776717	0.0230594
624.6	0.156321	0.0782777	0.0239353
624.8	0.15527	0.0779244	0.0234747
625	0.155284	0.0787144	0.0240032
625.2	0.155662	0.0791016	0.0243054
625.4	0.156285	0.0796301	0.0247348
625.6	0.15641	0.079237	0.0244537
625.8	0.156488	0.0794349	0.0239145
626	0.156381	0.078887	0.0236192
626.2	0.155804	0.0784221	0.0232247
626.4	0.155697	0.0783296	0.0233566
626.6	0.15541	0.0785406	0.0233159
626.8	0.15568	0.0786006	0.0234285
627	0.15576	0.0786669	0.0234803
627.2	0.156226	0.0790032	0.0237009
627.4	0.156648	0.0793246	0.0239338
627.6	0.156416	0.0795725	0.0242996
627.8	0.157149	0.0800242	0.0252549
628	0.157798	0.0802256	0.0257527
628.2	0.157926	0.0805242	0.025859
628.4	0.158156	0.0811447	0.0265846
628.6	0.15807	0.0814601	0.0273911
628.8	0.157726	0.0812007	0.0268342
629	0.158427	0.0816157	0.0271804
629.2	0.159191	0.0817282	0.027453
629.4	0.158976	0.0810548	0.0274466
629.6	0.158266	0.0800829	0.0262406
629.8	0.157674	0.0793515	0.0254654
630	0.157437	0.0786791	0.0248102
630.2	0.156531	0.0785322	0.0242473
630.4	0.156384	0.0784079	0.0237127
630.6	0.156228	0.0785626	0.0232162
630.8	0.156326	0.0789033	0.0226947
631	0.155904	0.0782992	0.0221809
631.2	0.155622	0.0783941	0.0222645
631.4	0.155714	0.0785556	0.0219984
631.6	0.155929	0.0790664	0.022626
631.8	0.156159	0.0794529	0.022892
632	0.15649	0.0802147	0.0229506
632.2	0.156367	0.0809066	0.0231667
632.4	0.156678	0.0807313	0.0238901
632.6	0.156818	0.0812058	0.0242258
632.8	0.157027	0.0812501	0.0243292
633	0.157407	0.0817632	0.0249873
633.2	0.157642	0.081543	0.0254495
633.4	0.157422	0.0811042	0.0253568
633.6	0.157585	0.081011	0.0253978
633.8	0.157818	0.080994	0.025889
634	0.158021	0.0809205	0.0260417
634.2	0.158129	0.081118	0.0264416
634.4	0.158689	0.0810096	0.0264785
634.6	0.158904	0.0809189	0.0266124
[truncated: 2,001 more rows]

## Sheet: CH11-PCH11
Time1	1E-05	2.5E-06	6.25E-07
235	0.00635698	0.00191878	0.00413078
235.2	0.00667093	0.00172164	0.00412391
235.4	0.00663448	0.00144349	0.00389583
235.6	0.00657894	0.001231	0.00385619
235.8	0.00694557	0.00126007	0.00383574
236	0.00717609	0.00110166	0.0031232
236.2	0.00755612	0.00101793	0.00316757
236.4	0.00809115	0.00078997	0.00318122
236.6	0.00821891	0.00084711	0.0031796
236.8	0.00838795	0.00077405	0.00295142
237	0.00856065	0.00162066	0.00286136
237.2	0.00874333	0.00196751	0.00261926
237.4	0.00880741	0.00191324	0.00280844
237.6	0.00907772	0.00155632	0.00294166
237.8	0.0102362	0.00202227	0.00330417
238	0.0103187	0.00206115	0.00306904
238.2	0.0100049	0.00183528	0.00269415
238.4	0.0104291	0.00219229	0.00299154
238.6	0.0108265	0.00122363	0.00302054
238.8	0.0109058	0.00096887	0.00287749
239	0.0112321	0.00129847	0.00302163
239.2	0.0117214	0.00145422	0.00355363
239.4	0.0121895	0.00148491	0.0036649
239.6	0.0124876	0.00155656	0.0036967
239.8	0.0130345	0.00189493	0.00379032
240	0.0130352	0.00141875	0.00364123
240.2	0.0138604	0.00151397	0.00431591
240.4	0.014366	0.00140375	0.00439563
240.6	0.0140184	0.00156841	0.00422261
240.8	0.0146851	0.00178098	0.00408195
241	0.014822	0.0023596	0.00373474
241.2	0.0155975	0.00260869	0.00406206
241.4	0.0153673	0.00276051	0.00418853
241.6	0.0155828	0.00256288	0.00420895
241.8	0.0158787	0.00302976	0.00419242
242	0.0157443	0.00316739	0.00366504
242.2	0.0158532	0.0033021	0.00422362
242.4	0.0163307	0.00364877	0.00476732
242.6	0.016371	0.00328795	0.0048592
242.8	0.0167058	0.00380934	0.00476022
243	0.0172917	0.00394515	0.00471448
243.2	0.018291	0.00446555	0.0053925
243.4	0.0188469	0.00444134	0.00536688
243.6	0.0189295	0.0045591	0.00554769
243.8	0.0191557	0.00458359	0.00563814
244	0.0192586	0.00436319	0.00537432
244.2	0.019943	0.0044673	0.00511475
244.4	0.0201574	0.00439453	0.00504754
244.6	0.019988	0.00387144	0.0047848
244.8	0.0203184	0.00391526	0.0045912
245	0.020263	0.00407918	0.00435037
245.2	0.0205637	0.0044007	0.00484866
245.4	0.0200235	0.00402515	0.00456786
245.6	0.020009	0.00386029	0.00478786
245.8	0.0199044	0.00381393	0.00498991
246	0.0191134	0.0033085	0.00407348
246.2	0.0191346	0.00379847	0.0045032
246.4	0.0189613	0.00368674	0.00381539
246.6	0.0191823	0.00363787	0.00356043
246.8	0.0197882	0.00371476	0.00327274
247	0.0204354	0.00402965	0.00326308
247.2	0.0212535	0.00454127	0.00377093
247.4	0.022035	0.00505942	0.00408344
247.6	0.0225163	0.00561554	0.00385598
247.8	0.0229285	0.00621034	0.00400715
248	0.0237827	0.00662999	0.00429178
248.2	0.02419	0.00689616	0.00474396
248.4	0.0246973	0.00738976	0.00549612
248.6	0.0251217	0.00755157	0.00580652
248.8	0.025348	0.00798476	0.00569708
249	0.0256503	0.00807887	0.00601706
249.2	0.0249578	0.00783542	0.00598299
249.4	0.0246765	0.00750342	0.00591814
249.6	0.0239687	0.0070006	0.0055727
249.8	0.0238207	0.00649204	0.00542677
250	0.0234812	0.00589916	0.00436472
250.2	0.0236214	0.00589252	0.00429441
250.4	0.0230237	0.00508509	0.00352345
250.6	0.0231565	0.0045658	0.00330196
250.8	0.0233431	0.00409767	0.00268327
251	0.0235477	0.00378777	0.00269283
251.2	0.0236412	0.00339836	0.00257574
251.4	0.0236812	0.00347335	0.00222466
251.6	0.0238784	0.00311468	0.00231424
251.8	0.0241186	0.00305479	0.00269011
252	0.0249683	0.00315172	0.00306882
252.2	0.0248847	0.00340117	0.00319103
252.4	0.0251766	0.00373699	0.00370654
252.6	0.0260374	0.00445004	0.00415155
252.8	0.0259029	0.00442529	0.00407743
253	0.0259839	0.00454109	0.00461745
253.2	0.0259277	0.00500884	0.00512692
253.4	0.0268255	0.00568127	0.00572866
253.6	0.0274172	0.00645581	0.0062434
253.8	0.0283685	0.00721224	0.00660451
254	0.0285628	0.00726711	0.00685286
254.2	0.0291335	0.00786865	0.00751724
254.4	0.0292156	0.00799409	0.0075364
254.6	0.0297703	0.00792736	0.00743823
254.8	0.0299327	0.00793298	0.00727368
255	0.0299652	0.00747127	0.00708216
255.2	0.0295132	0.00748304	0.00670619
255.4	0.0293974	0.00739939	0.00651657
255.6	0.0290985	0.00755936	0.0068542
255.8	0.0287402	0.00743349	0.00655481
256	0.0286267	0.00702845	0.00622219
256.2	0.0280984	0.00685451	0.00593178
256.4	0.0282533	0.00656042	0.00597745
256.6	0.0285272	0.00637637	0.00554794
256.8	0.0282694	0.00604927	0.00523932
257	0.0286518	0.00570977	0.00544165
257.2	0.0289939	0.00571112	0.00515641
257.4	0.0296576	0.00592344	0.00496071
257.6	0.0298885	0.00603892	0.00472252
257.8	0.0302835	0.00592219	0.00467749
258	0.0304978	0.00587928	0.00509837
258.2	0.0312055	0.00612532	0.00563303
258.4	0.0310618	0.0059186	0.00547304
258.6	0.0315216	0.00587391	0.00559171
258.8	0.0315161	0.00570633	0.00541
259	0.0318459	0.00599123	0.00550427
259.2	0.0318001	0.00680577	0.00584279
259.4	0.0319346	0.00711041	0.00588367
259.6	0.0318671	0.00753819	0.00637866
259.8	0.0325167	0.0075875	0.00686529
260	0.0327592	0.00784935	0.00642886
260.2	0.0335974	0.00859576	0.00657928
260.4	0.0335032	0.00813775	0.00610938
260.6	0.0333619	0.00826918	0.0055057
260.8	0.0336297	0.00853229	0.00557614
261	0.0340512	0.00891603	0.00574078
261.2	0.0339101	0.00899682	0.00516241
261.4	0.0339017	0.00932551	0.00544467
261.6	0.0333486	0.00894534	0.00497959
261.8	0.0337935	0.00895002	0.00565163
262	0.0336926	0.00924919	0.00621083
262.2	0.0340893	0.00911697	0.00654525
262.4	0.0339114	0.0090297	0.00609916
262.6	0.0337235	0.008552	0.00595699
262.8	0.0335653	0.00852051	0.00566212
263	0.0335365	0.0084985	0.00559779
263.2	0.0339286	0.00905358	0.00597693
263.4	0.0339365	0.00899668	0.00612619
263.6	0.034381	0.00961437	0.0067295
263.8	0.0350138	0.0100885	0.00684864
264	0.0353757	0.00999215	0.00634832
264.2	0.0357064	0.00968467	0.00608941
264.4	0.0353332	0.00944943	0.00578749
264.6	0.0353116	0.0096567	0.00533731
264.8	0.0356349	0.00974585	0.00542821
265	0.0360015	0.0100748	0.00578923
265.2	0.035428	0.00956825	0.00574029
265.4	0.0353683	0.00928191	0.00647441
265.6	0.0353495	0.00915037	0.00624508
265.8	0.0355206	0.00936407	0.00632005
266	0.0358184	0.00966071	0.00660979
266.2	0.0362469	0.00952161	0.00608061
266.4	0.03627	0.0097877	0.00591932
266.6	0.0364982	0.00991398	0.00628163
266.8	0.0365731	0.00994395	0.00603506
267	0.0372669	0.0102759	0.00686842
267.2	0.037848	0.0107922	0.00766913
267.4	0.0381731	0.0110858	0.00783345
267.6	0.039053	0.0113566	0.00808644
267.8	0.0395657	0.0111649	0.00803229
268	0.0400956	0.010742	0.00770839
268.2	0.0397162	0.0107038	0.0074461
268.4	0.0399095	0.010887	0.00715507
268.6	0.0400204	0.0107501	0.00695536
268.8	0.0404162	0.0104518	0.00677931
269	0.0405858	0.0103354	0.00717221
269.2	0.0401441	0.0107226	0.00747534
269.4	0.0400653	0.0104379	0.00745387
269.6	0.0400295	0.0107036	0.00704479
269.8	0.0399689	0.0109715	0.00684852
270	0.0407184	0.0113813	0.0071808
270.2	0.0406811	0.0113691	0.00702081
270.4	0.0406961	0.0116413	0.00729411
270.6	0.0406183	0.0116197	0.0073661
270.8	0.0406555	0.0115719	0.00765577
271	0.0406738	0.0111965	0.00825881
271.2	0.0404529	0.011024	0.0079838
271.4	0.0407472	0.0110542	0.00767949
271.6	0.0408292	0.0105394	0.00764587
271.8	0.0402074	0.0100913	0.00754258
272	0.0402869	0.010122	0.00755235
272.2	0.0400843	0.010155	0.00771575
272.4	0.0404182	0.0105694	0.00729224
272.6	0.0406089	0.0110213	0.00742683
272.8	0.0407152	0.0108424	0.00678403
273	0.0409788	0.0109131	0.00687866
273.2	0.0414429	0.0114631	0.00697175
273.4	0.0415003	0.0109866	0.00638128
273.6	0.0420288	0.0112335	0.00629295
273.8	0.0423408	0.0114259	0.00606705
274	0.0424357	0.0117314	0.00595243
274.2	0.042472	0.0116533	0.0062083
274.4	0.0426412	0.0113786	0.00610035
274.6	0.0429952	0.011526	0.00619639
274.8	0.0436682	0.0113722	0.00639207
275	0.0440108	0.0115533	0.00655443
275.2	0.0444065	0.011615	0.00647115
275.4	0.0443473	0.0114658	0.00643564
275.6	0.0444975	0.0112854	0.00658086
275.8	0.0444411	0.0116582	0.00704753
276	0.0451429	0.0119538	0.00755662
276.2	0.0454294	0.0126117	0.00806299
276.4	0.0451671	0.0127674	0.00760822
276.6	0.045575	0.0132091	0.007981
276.8	0.0458776	0.0128668	0.00764502
277	0.0459997	0.0126931	0.00767711
277.2	0.0463855	0.0130311	0.00796509
277.4	0.0458945	0.0129624	0.00758404
277.6	0.0463212	0.0130072	0.00785364
277.8	0.0458993	0.0132397	0.00824481
278	0.0456277	0.0134138	0.008502
278.2	0.0456375	0.0128229	0.00838813
278.4	0.0462039	0.0131466	0.00815288
278.6	0.0462335	0.0134553	0.00842278
278.8	0.046346	0.0135548	0.00791053
279	0.0461776	0.0134465	0.00773415
279.2	0.0460474	0.0130359	0.00769907
279.4	0.0457256	0.0127255	0.00744023
279.6	0.0461508	0.0127261	0.00765412
279.8	0.0462752	0.0126552	0.00817309
280	0.0465559	0.0120162	0.00816762
280.2	0.0466786	0.0120355	0.00791559
280.4	0.0462544	0.0113712	0.00689068
280.6	0.0469346	0.0118007	0.00765315
280.8	0.047302	0.0113936	0.00756149
281	0.047399	0.0114734	0.00743163
281.2	0.0476191	0.0115532	0.00793754
281.4	0.0475609	0.0113539	0.00767652
281.6	0.0479839	0.0110251	0.00758648
281.8	0.0476736	0.0110747	0.00743262
282	0.0481941	0.0113861	0.00744907
282.2	0.0481941	0.0115628	0.0067355
282.4	0.0484708	0.0120987	0.00670898
282.6	0.0485295	0.0124055	0.00731676
282.8	0.0482768	0.0124177	0.00657773
283	0.0482262	0.0120885	0.00710963
283.2	0.0480764	0.0124977	0.00743175
283.4	0.0473585	0.0125016	0.00705221
283.6	0.0474533	0.0129785	0.00755251
283.8	0.0472424	0.0127089	0.00741618
284	0.0477172	0.0124426	0.00723166
284.2	0.0476994	0.0128063	0.00711538
284.4	0.0478629	0.0132415	0.00728041
284.6	0.0488834	0.0138885	0.00796923
284.8	0.0491676	0.0138635	0.00807845
285	0.0492722	0.0139775	0.00801456
285.2	0.0493078	0.0139167	0.00803141
285.4	0.049559	0.0141512	0.00758197
285.6	0.0498753	0.0141931	0.00775139
285.8	0.0503307	0.0145329	0.00772681
286	0.051053	0.0152735	0.00825434
286.2	0.0511033	0.0147614	0.00781503
286.4	0.051496	0.0152112	0.00848729
286.6	0.0518892	0.0155821	0.00893459
286.8	0.0513483	0.0151941	0.00842797
287	0.0511385	0.0152444	0.00852712
287.2	0.0505234	0.0151937	0.00830537
287.4	0.050258	0.015366	0.00827706
287.6	0.0502286	0.0152763	0.00817241
287.8	0.0502012	0.0148113	0.0078732
288	0.0506318	0.0148766	0.00775259
288.2	0.0505721	0.015226	0.0073042
288.4	0.0510166	0.0151029	0.00709345
288.6	0.0510889	0.0148469	0.00704112
288.8	0.0508681	0.0143539	0.00713661
289	0.0502707	0.0136315	0.00642867
289.2	0.0500823	0.0133701	0.00612516
289.4	0.0504921	0.0134054	0.00636978
289.6	0.050783	0.0130362	0.00656457
289.8	0.0510953	0.01289	0.00659789
290	0.0513508	0.0127385	0.00704405
290.2	0.0516744	0.0124358	0.00741395
290.4	0.0519563	0.0132091	0.00775863
290.6	0.0518541	0.0132677	0.00769911
290.8	0.0519535	0.0133578	0.00766492
291	0.051849	0.0132573	0.00756446
291.2	0.051941	0.0132464	0.00756044
291.4	0.0524968	0.0139478	0.00772189
291.6	0.0525015	0.0137903	0.00766522
291.8	0.0533186	0.0143312	0.0082375
292	0.0538816	0.0147613	0.00823221
292.2	0.0538816	0.0146261	0.00805627
292.4	0.0538773	0.0145362	0.00781343
292.6	0.0535209	0.0145884	0.00781221
292.8	0.0537617	0.0145652	0.00753312
293	0.0536256	0.0142919	0.00736654
293.2	0.0539533	0.0144563	0.00689516
293.4	0.0543764	0.0148464	0.00697564
293.6	0.0545235	0.0145654	0.00690877
293.8	0.0547038	0.0142628	0.00653148
294	0.0551595	0.0146052	0.00701472
294.2	0.0549996	0.0149743	0.00700513
294.4	0.0549476	0.0155827	0.00657418
294.6	0.0545268	0.015596	0.00634654
294.8	0.0548377	0.0155411	0.00607516
295	0.0551155	0.0156321	0.00623056
295.2	0.0551661	0.0158384	0.00620476
295.4	0.0554463	0.016156	0.00674023
295.6	0.055928	0.0162421	0.00685259
295.8	0.0563823	0.0165276	0.00756406
296	0.0562707	0.0162063	0.00772778
296.2	0.0561065	0.0162019	0.00789247
296.4	0.0567866	0.0166065	0.00819299
296.6	0.0575906	0.0171477	0.00884301
296.8	0.0583131	0.0173837	0.00908912
297	0.058758	0.0174491	0.00945979
297.2	0.059162	0.0177688	0.00929399
297.4	0.0597562	0.017927	0.00987209
297.6	0.0600048	0.0178929	0.00990775
297.8	0.0602108	0.0184644	0.00968446
298	0.0599018	0.0187417	0.00993417
298.2	0.0599169	0.0185191	0.00988038
298.4	0.0601024	0.0186207	0.00954375
298.6	0.0593484	0.0180389	0.00895538
298.8	0.0595732	0.0178702	0.00885274
299	0.0593385	0.0176322	0.00877462
299.2	0.0588853	0.0177208	0.00841437
299.4	0.0588985	0.0176597	0.00835681
299.6	0.0587933	0.0173738	0.00836015
299.8	0.0586654	0.0168073	0.00877402
300	0.0584832	0.0168114	0.00851074
300.2	0.0584567	0.0170412	0.00837061
300.4	0.0592306	0.0176047	0.00904923
300.6	0.0596508	0.0180435	0.00974402
300.8	0.0594502	0.0182294	0.0100221
301	0.0597716	0.0185665	0.0103949
301.2	0.0601826	0.0188734	0.0105641
301.4	0.060276	0.0188126	0.0105613
301.6	0.060413	0.0192833	0.0108118
301.8	0.0610612	0.0198525	0.0110317
302	0.060676	0.0187422	0.0108139
302.2	0.0611769	0.0186697	0.0106833
302.4	0.0608383	0.0187275	0.0101803
302.6	0.0607336	0.0183489	0.00967451
302.8	0.0614069	0.0181232	0.0097883
303	0.061441	0.017889	0.00959469
303.2	0.0614692	0.0176471	0.00963921
303.4	0.0614263	0.0172411	0.00973861
303.6	0.0616946	0.0170474	0.0099989
303.8	0.0621527	0.0174614	0.0103789
304	0.062378	0.0181919	0.0106854
304.2	0.0625192	0.0182331	0.0107721
304.4	0.0628887	0.018391	0.011304
304.6	0.0626542	0.0179713	0.0110533
304.8	0.0624548	0.0179138	0.0103333
305	0.0628332	0.0180064	0.0104451
305.2	0.0632872	0.0180642	0.0106755
305.4	0.0630331	0.0177695	0.0106677
305.6	0.0633193	0.0182242	0.0110268
305.8	0.0635048	0.0184127	0.0107737
306	0.0630964	0.0175803	0.00993157
306.2	0.0636493	0.0185057	0.00949512
306.4	0.0638464	0.0187809	0.00938336
306.6	0.0639598	0.0187685	0.00893857
306.8	0.064707	0.0191967	0.00948537
307	0.0651439	0.0194902	0.00982785
307.2	0.0652065	0.0193989	0.0100786
307.4	0.0656984	0.0203036	0.0106266
307.6	0.0662545	0.0207284	0.0111603
307.8	0.0666439	0.021524	0.0118198
308	0.0667361	0.0215653	0.0120121
308.2	0.0665875	0.0214221	0.0116337
308.4	0.0666497	0.0214215	0.0116381
308.6	0.0664133	0.0208387	0.0111418
308.8	0.0666865	0.0211817	0.0115137
309	0.0666016	0.0206759	0.0115998
309.2	0.0674033	0.0208748	0.0118983
309.4	0.0672868	0.0204782	0.0113226
309.6	0.0674011	0.0205653	0.0116155
309.8	0.0673395	0.0202955	0.011086
310	0.0678206	0.0201208	0.010525
310.2	0.067631	0.020684	0.0103486
310.4	0.0677387	0.0213598	0.0105788
310.6	0.067665	0.0213961	0.0101382
310.8	0.0683676	0.021872	0.0103592
311	0.0685107	0.0219133	0.0104643
311.2	0.0682236	0.0218119	0.0102775
311.4	0.0682437	0.0220646	0.01027
311.6	0.0682881	0.0220613	0.0104302
311.8	0.0683908	0.0223226	0.0108354
312	0.0684867	0.0219266	0.0110839
312.2	0.0685878	0.0221737	0.0109319
312.4	0.0684032	0.0217593	0.0110955
312.6	0.0683839	0.0213045	0.0107693
312.8	0.0681735	0.021018	0.010688
313	0.0681987	0.0203917	0.0100714
313.2	0.0689534	0.0206239	0.010397
313.4	0.0683429	0.019707	0.00993555
313.6	0.0681309	0.0193799	0.0101794
313.8	0.0680636	0.0193397	0.00972957
314	0.0674774	0.0188867	0.00939671
314.2	0.0669521	0.0190335	0.00911351
314.4	0.0674453	0.0194603	0.00930955
314.6	0.0672179	0.0189312	0.00864762
314.8	0.067832	0.0197159	0.00908737
315	0.068037	0.0196677	0.00920011
315.2	0.0680119	0.0197043	0.00878149
315.4	0.0681721	0.0195783	0.00871462
315.6	0.069093	0.0201984	0.00936628
315.8	0.0691967	0.0203365	0.00977862
316	0.0691729	0.0201885	0.00962083
316.2	0.0688714	0.0206652	0.00970345
316.4	0.0689493	0.0205822	0.00977159
316.6	0.0690784	0.0207851	0.00947452
316.8	0.0689948	0.0211684	0.00964238
317	0.069542	0.0213174	0.0100994
317.2	0.0698933	0.0215534	0.0103956
317.4	0.0696142	0.0214284	0.0103583
317.6	0.0696241	0.0213757	0.0107026
317.8	0.0689603	0.021178	0.0105308
318	0.0689473	0.0209824	0.0105154
318.2	0.0692043	0.0211663	0.0106677
318.4	0.0698688	0.0219134	0.0110507
318.6	0.0698925	0.0220928	0.0107043
318.8	0.0699679	0.022626	0.0107998
319	0.070111	0.0223815	0.0108439
319.2	0.0702031	0.0224787	0.0110063
319.4	0.0702258	0.022303	0.011093
319.6	0.070859	0.0227455	0.0114725
319.8	0.070344	0.0227057	0.0111968
320	0.0703912	0.0227984	0.0112458
320.2	0.0704327	0.0233051	0.0115871
320.4	0.0709903	0.0235226	0.0116195
320.6	0.0715826	0.0245657	0.0118911
320.8	0.0720895	0.0247971	0.0121952
321	0.0726476	0.0250342	0.0123256
321.2	0.0729889	0.0252734	0.0125063
321.4	0.0730113	0.0247106	0.0122254
321.6	0.0731588	0.0245872	0.0123912
321.8	0.0731311	0.0245609	0.0120575
322	0.073402	0.0243031	0.011945
322.2	0.0729918	0.0242417	0.011955
322.4	0.0731954	0.0242411	0.0117074
322.6	0.0725017	0.0235879	0.0114497
322.8	0.0721416	0.0234512	0.011489
323	0.072962	0.0232051	0.0120439
323.2	0.0731702	0.0229635	0.0121341
323.4	0.0732221	0.022712	0.0117229
323.6	0.0737371	0.0230202	0.0120919
323.8	0.0730643	0.0230138	0.011874
324	0.0728068	0.0229835	0.0118371
324.2	0.072787	0.0230679	0.0113926
324.4	0.0733635	0.023307	0.0114145
324.6	0.0736968	0.0239331	0.0111126
324.8	0.0739038	0.0239554	0.010856
325	0.0744973	0.0242555	0.0108101
325.2	0.074348	0.0241258	0.010536
325.4	0.0743466	0.0235532	0.0100833
325.6	0.0745337	0.0235506	0.0101911
325.8	0.0746651	0.022835	0.00993635
326	0.0747194	0.0222162	0.0100031
326.2	0.0746993	0.0218445	0.0102022
326.4	0.0747379	0.0216188	0.0103377
326.6	0.0745389	0.0216972	0.0102895
326.8	0.0749771	0.0217362	0.0105979
327	0.0759088	0.0218817	0.0108726
327.2	0.0759319	0.0219317	0.011171
327.4	0.076081	0.0222192	0.0116671
327.6	0.0761156	0.022466	0.0122806
327.8	0.0755991	0.0220133	0.011877
328	0.0760711	0.0225736	0.0121878
328.2	0.0760403	0.0227106	0.01232
328.4	0.0763521	0.023169	0.0124638
328.6	0.0756818	0.0231102	0.0116044
328.8	0.0755123	0.0233392	0.0117563
329	0.0755639	0.02344	0.0114715
329.2	0.0754678	0.0236352	0.0111371
329.4	0.0758404	0.0232445	0.0111816
329.6	0.0757802	0.0234414	0.0113111
329.8	0.0759057	0.0233313	0.0114718
330	0.0759712	0.0235575	0.0117585
330.2	0.0760964	0.0241057	0.0121141
330.4	0.0763106	0.0244533	0.0117855
330.6	0.0764135	0.0241672	0.0112183
330.8	0.0767248	0.0241234	0.0116341
331	0.0770673	0.0244345	0.0115209
331.2	0.0774322	0.0246023	0.012255
331.4	0.0776396	0.0251216	0.0128119
331.6	0.0775171	0.0248893	0.0125572
331.8	0.0776746	0.0245264	0.0122516
332	0.0780982	0.0252684	0.0125247
332.2	0.0781158	0.0248309	0.0120945
332.4	0.0781172	0.025031	0.0118192
332.6	0.078184	0.0248786	0.0113746
332.8	0.0789648	0.0254087	0.0119425
333	0.0792692	0.0255185	0.0116771
333.2	0.0792542	0.0252567	0.0118285
333.4	0.0789732	0.0250591	0.0122504
333.6	0.0784394	0.0252148	0.0125809
333.8	0.0785519	0.0248004	0.0128926
334	0.0789409	0.0250142	0.012948
334.2	0.0787926	0.024615	0.0124756
334.4	0.0783906	0.0240601	0.0118195
334.6	0.0781527	0.0234247	0.0116174
334.8	0.0782857	0.0232063	0.0121353
335	0.0783579	0.0232973	0.0119907
335.2	0.0784939	0.0235432	0.0124875
335.4	0.0785647	0.0237762	0.0121235
335.6	0.0790841	0.0234793	0.0117675
335.8	0.0795422	0.0235435	0.0113022
336	0.0803401	0.0244853	0.0114892
336.2	0.0810477	0.0250117	0.0118538
336.4	0.0814198	0.0255445	0.0119343
336.6	0.081976	0.0260558	0.0119901
336.8	0.0823938	0.0266716	0.0127757
337	0.0825249	0.0271663	0.0129178
337.2	0.0822393	0.027387	0.0130914
337.4	0.0823391	0.0276311	0.0129527
337.6	0.0821072	0.0276435	0.0129871
337.8	0.0822362	0.0276205	0.013153
338	0.0820212	0.0275655	0.0128995
338.2	0.0817568	0.0268459	0.0127677
338.4	0.0814615	0.0267109	0.0125776
338.6	0.0818048	0.0257231	0.0125465
338.8	0.0825025	0.0254838	0.0129227
339	0.0822681	0.0251239	0.0126694
339.2	0.0825179	0.0251438	0.0126221
339.4	0.0828742	0.0249063	0.0120964
339.6	0.0829108	0.0248417	0.0119826
339.8	0.0831917	0.0248139	0.0119038
340	0.0834602	0.0251166	0.0124349
340.2	0.0838071	0.0259576	0.0129573
340.4	0.0838167	0.025812	0.0126734
340.6	0.0840174	0.0269801	0.0138073
340.8	0.0842944	0.0276872	0.0143463
341	0.084337	0.0278456	0.0140099
341.2	0.0839326	0.02781	0.0138411
341.4	0.0841114	0.0279763	0.0142089
341.6	0.0840392	0.0281952	0.0149726
341.8	0.0842193	0.028678	0.0150379
342	0.084028	0.0284197	0.0147322
342.2	0.0843733	0.0283159	0.0144579
342.4	0.0842935	0.0284051	0.0143341
342.6	0.0843143	0.0279571	0.014322
342.8	0.0842437	0.027759	0.0138473
343	0.0838708	0.0272038	0.0130914
343.2	0.0838804	0.0272077	0.0127699
343.4	0.0835057	0.0268146	0.0125827
343.6	0.0832257	0.0266362	0.0122044
343.8	0.0833629	0.0262735	0.012295
344	0.0833912	0.0267984	0.0128235
344.2	0.0838782	0.0270583	0.0132223
344.4	0.0836004	0.0265629	0.0131968
344.6	0.0837424	0.0275022	0.0138874
344.8	0.0839299	0.0273786	0.0135315
345	0.0843682	0.0269382	0.0133312
345.2	0.084389	0.027056	0.0136777
345.4	0.0847004	0.0277337	0.0142435
345.6	0.0847391	0.0276825	0.0137386
345.8	0.0854147	0.0278164	0.01375
346	0.0854247	0.0274983	0.0134471
346.2	0.0859746	0.0276997	0.0137514
346.4	0.0860307	0.0272438	0.0136548
346.6	0.0853658	0.0266522	0.0130503
346.8	0.0857523	0.0262419	0.0125668
347	0.0855343	0.0257935	0.011628
347.2	0.0853273	0.0254642	0.01158
347.4	0.0850309	0.0252742	0.0118027
347.6	0.0851339	0.0254865	0.0116386
347.8	0.0857073	0.0258173	0.0122674
348	0.0860058	0.0258926	0.0131161
348.2	0.0859175	0.0257095	0.0130863
348.4	0.0859307	0.0258664	0.0132165
348.6	0.0858766	0.0263606	0.0131626
348.8	0.0863995	0.0264623	0.0129717
349	0.0863545	0.0265363	0.0126908
349.2	0.0863973	0.027365	0.0128336
349.4	0.0869461	0.0279841	0.0131369
349.6	0.0866982	0.0274321	0.0125965
349.8	0.0871198	0.0279706	0.0131094
350	0.0871763	0.0284113	0.0132232
350.2	0.0873288	0.0285815	0.0136123
350.4	0.0874716	0.0289047	0.0139818
350.6	0.0876354	0.0292453	0.0142009
350.8	0.0882879	0.0296132	0.0144971
351	0.0880902	0.0294896	0.0144505
351.2	0.0882686	0.0294375	0.0153674
351.4	0.0880596	0.0295407	0.0154676
351.6	0.0881746	0.0298083	0.0156144
351.8	0.0884609	0.0299831	0.0161664
352	0.0880691	0.0297382	0.0162743
352.2	0.0878584	0.0301936	0.0162304
352.4	0.0878874	0.0297648	0.0160465
352.6	0.0873686	0.0297637	0.0154903
352.8	0.0880178	0.0299544	0.0153384
353	0.0881683	0.0298818	0.0149695
353.2	0.0878093	0.0292935	0.0145136
353.4	0.0876241	0.0291558	0.0144258
353.6	0.0871368	0.0291812	0.01381
353.8	0.0873977	0.0291185	0.0139985
354	0.0870453	0.0288054	0.0136546
354.2	0.0870493	0.0285764	0.0139314
354.4	0.0878438	0.0293388	0.014737
354.6	0.0875933	0.0285464	0.0145099
354.8	0.087708	0.028158	0.0142646
355	0.0877508	0.0275426	0.0138929
355.2	0.0879981	0.0274983	0.0141772
355.4	0.0879188	0.0274076	0.0135602
355.6	0.0882777	0.0281816	0.0142566
355.8	0.0886057	0.0286453	0.014227
356	0.0885669	0.0287333	0.0142191
356.2	0.0894515	0.029068	0.0143096
356.4	0.089752	0.0286721	0.0140422
356.6	0.0904934	0.0291578	0.0143729
356.8	0.0914439	0.0299682	0.0149782
357	0.0918263	0.0300263	0.0147588
357.2	0.0913437	0.029563	0.0146423
357.4	0.0920374	0.0307082	0.0154025
357.6	0.0923314	0.0309754	0.0155698
357.8	0.0923133	0.0304167	0.0156049
358	0.0924196	0.0306831	0.0157287
358.2	0.0931065	0.0308347	0.0165214
358.4	0.0936497	0.0311982	0.017084
358.6	0.0933028	0.0307239	0.0169365
358.8	0.0933469	0.0304458	0.0168034
359	0.0935725	0.0307179	0.0168019
359.2	0.0935742	0.0311109	0.0167902
359.4	0.0932356	0.0306789	0.015852
359.6	0.0928628	0.0311326	0.0156921
359.8	0.09242	0.0310427	0.0152646
360	0.0921933	0.0306348	0.0150496
360.2	0.0921602	0.0309198	0.0149326
360.4	0.091324	0.0310584	0.0144463
360.6	0.0914603	0.0312906	0.0148614
360.8	0.0912222	0.0317138	0.0150792
361	0.0909585	0.0313231	0.0150647
361.2	0.0907917	0.0308457	0.0150838
361.4	0.0917775	0.031686	0.0156668
361.6	0.0920905	0.0316004	0.0156991
361.8	0.0920886	0.0311192	0.015723
362	0.0921581	0.0310113	0.0161457
362.2	0.0922463	0.0306961	0.0161787
362.4	0.0928258	0.0309239	0.0164469
362.6	0.0930416	0.0310513	0.0166437
362.8	0.0931887	0.0308479	0.0167363
363	0.0935693	0.0309423	0.0161435
363.2	0.0936482	0.030892	0.0157371
363.4	0.0939067	0.0307273	0.0153297
363.6	0.0939634	0.031258	0.0152908
363.8	0.0937009	0.0310582	0.0150658
364	0.0936696	0.0306562	0.0146422
364.2	0.0935129	0.0314478	0.0144226
364.4	0.0933351	0.0314614	0.0142298
364.6	0.093479	0.0314057	0.0146941
364.8	0.0935768	0.0320437	0.014954
365	0.0935297	0.0319079	0.0148016
365.2	0.0939412	0.0318361	0.014214
365.4	0.0940596	0.0319966	0.0145265
365.6	0.0935273	0.0314884	0.0142798
365.8	0.0930963	0.031026	0.0140222
366	0.0936357	0.0309375	0.0141856
366.2	0.0940765	0.0309656	0.0140509
366.4	0.0944947	0.0309321	0.0141886
366.6	0.094353	0.0307495	0.0144299
366.8	0.0943561	0.0306904	0.0141037
367	0.094648	0.0306232	0.0140152
367.2	0.0948477	0.0308684	0.0139721
367.4	0.0952746	0.0311711	0.0140671
367.6	0.0953066	0.0311592	0.0141478
367.8	0.0953109	0.031159	0.0141085
368	0.0955815	0.0314229	0.0145854
368.2	0.0957892	0.031903	0.0144129
368.4	0.0958403	0.0321039	0.014729
368.6	0.0963102	0.0326306	0.0147181
368.8	0.0966235	0.033363	0.0149858
369	0.0965319	0.0330831	0.0146634
369.2	0.0967545	0.0329977	0.0146447
369.4	0.0966989	0.0331991	0.0151397
369.6	0.0967643	0.0328663	0.0151852
369.8	0.0969995	0.0327849	0.0150511
370	0.0970663	0.0326962	0.0150684
370.2	0.0968402	0.0328861	0.0149614
370.4	0.0966069	0.0326008	0.0148766
370.6	0.0964726	0.0322042	0.0147541
370.8	0.0969534	0.0324398	0.015053
371	0.0969241	0.0323967	0.0155441
371.2	0.0967997	0.0323507	0.0157029
371.4	0.096411	0.0321853	0.0159704
371.6	0.0961562	0.0318684	0.0159186
371.8	0.096037	0.0317255	0.0160114
372	0.0958341	0.0309012	0.0159363
372.2	0.0961609	0.0308893	0.0158549
372.4	0.0960202	0.0309136	0.0162152
372.6	0.0965004	0.0305954	0.0161848
372.8	0.0961648	0.0302762	0.0166008
373	0.0964471	0.0303469	0.0164111
373.2	0.0964938	0.0302993	0.0166113
373.4	0.096607	0.0305246	0.0167732
373.6	0.0967643	0.0307371	0.0170523
373.8	0.0972351	0.0307208	0.0168752
374	0.0974239	0.0305682	0.0166866
374.2	0.0976419	0.0309002	0.0167408
374.4	0.0974626	0.0306897	0.0163655
374.6	0.0982875	0.0307682	0.0161995
374.8	0.0985791	0.0313886	0.0164057
375	0.0981914	0.031548	0.0161861
375.2	0.0984323	0.0322403	0.0164397
375.4	0.097847	0.0325037	0.0158363
375.6	0.097567	0.032904	0.0154442
375.8	0.0971995	0.0329948	0.015338
376	0.0968903	0.0330461	0.0154574
376.2	0.0969907	0.033767	0.0158769
376.4	0.0965197	0.0331394	0.015379
376.6	0.0966449	0.0329035	0.0151777
376.8	0.0964716	0.0335135	0.0151896
377	0.0971172	0.034298	0.0152257
377.2	0.0972908	0.0343728	0.0156744
377.4	0.0976755	0.0348333	0.0160058
377.6	0.0984532	0.0351803	0.0164627
377.8	0.0984976	0.0344991	0.0164913
378	0.0981509	0.0342332	0.0160905
378.2	0.0982485	0.0339951	0.0161089
378.4	0.0985059	0.0337499	0.01624
378.6	0.0993354	0.0341855	0.0167482
378.8	0.0995064	0.0343512	0.017302
379	0.0996021	0.0344116	0.0176806
379.2	0.100101	0.0350034	0.0179821
379.4	0.099741	0.0345632	0.0171184
379.6	0.0995999	0.0344965	0.0168209
379.8	0.0994417	0.0342473	0.0166298
380	0.0997512	0.034502	0.01663
380.2	0.100148	0.0343358	0.016163
380.4	0.100168	0.034194	0.0157409
380.6	0.100449	0.0343544	0.0158662
380.8	0.100871	0.0348199	0.0160169
381	0.100848	0.0347683	0.0159895
381.2	0.100806	0.0347126	0.0160041
381.4	0.100989	0.0348066	0.0157765
381.6	0.101056	0.0345762	0.0157871
381.8	0.100872	0.0341537	0.0159623
382	0.100893	0.0337568	0.0160998
382.2	0.100736	0.0334125	0.0160651
382.4	0.100557	0.0334048	0.0165758
382.6	0.100674	0.0335724	0.016634
382.8	0.100747	0.0334255	0.0168875
383	0.100307	0.0329462	0.0169904
383.2	0.100398	0.0329474	0.0168661
383.4	0.100271	0.0330467	0.0163603
383.6	0.10043	0.0333011	0.0159911
383.8	0.100701	0.0334229	0.0156822
384	0.101106	0.0334226	0.015443
384.2	0.101662	0.0339121	0.0158863
384.4	0.101959	0.0345624	0.0164287
384.6	0.102375	0.0346789	0.016996
384.8	0.102673	0.0349947	0.0170272
385	0.10283	0.0353697	0.0171395
385.2	0.103193	0.0358039	0.0173297
385.4	0.103819	0.0366032	0.0177629
385.6	0.103556	0.0365995	0.0184142
385.8	0.104169	0.0371787	0.018833
386	0.104089	0.0372528	0.0189316
386.2	0.103861	0.0371314	0.0186069
386.4	0.103799	0.0369874	0.0188582
386.6	0.104004	0.0369825	0.0186463
386.8	0.104022	0.0371223	0.0190444
387	0.103738	0.0369486	0.0194986
387.2	0.103546	0.0371948	0.0191872
387.4	0.103804	0.0374756	0.0188783
387.6	0.103738	0.0365205	0.0179668
387.8	0.103916	0.0366345	0.0178739
388	0.104373	0.0369461	0.0181449
388.2	0.105157	0.0379849	0.0190801
388.4	0.105316	0.0377492	0.018829
388.6	0.105689	0.0377914	0.0190246
388.8	0.105859	0.0376982	0.0187286
389	0.105687	0.0375373	0.0181914
389.2	0.105394	0.0374734	0.0177848
389.4	0.105338	0.0375939	0.0180518
389.6	0.105204	0.0374019	0.0181347
389.8	0.105568	0.0378743	0.0178678
390	0.105296	0.0371072	0.0171121
390.2	0.105197	0.0369109	0.0169639
390.4	0.105122	0.0364646	0.0168537
390.6	0.105286	0.0364536	0.0167941
390.8	0.104993	0.0365187	0.0170599
391	0.104742	0.036402	0.0171362
391.2	0.105065	0.0361289	0.01688
391.4	0.105302	0.0357572	0.0169887
391.6	0.104879	0.0355031	0.0166032
391.8	0.105398	0.0358312	0.0169398
392	0.106037	0.0362671	0.0173035
392.2	0.105526	0.036231	0.0171077
392.4	0.105585	0.0358532	0.0167308
392.6	0.105578	0.0360677	0.0172893
392.8	0.105347	0.0360402	0.0171858
393	0.10496	0.0359315	0.0167221
393.2	0.104522	0.0359426	0.0169292
393.4	0.104711	0.0364221	0.0170333
393.6	0.104992	0.0365109	0.0171561
393.8	0.105005	0.0368294	0.0175315
394	0.104982	0.0365883	0.0169609
394.2	0.10491	0.0368791	0.0173715
394.4	0.104673	0.0365598	0.0177391
394.6	0.104952	0.0368111	0.017616
394.8	0.105081	0.0364971	0.0176415
395	0.105209	0.0361025	0.0174559
395.2	0.105351	0.0357415	0.0175782
395.4	0.104713	0.0353144	0.0172792
395.6	0.104863	0.035367	0.0168673
395.8	0.105331	0.0350542	0.0169073
396	0.105581	0.0352625	0.0173843
396.2	0.104886	0.0348628	0.0170546
396.4	0.106033	0.0354242	0.0176643
396.6	0.105833	0.0360013	0.0181594
396.8	0.105762	0.0358162	0.0178325
397	0.105728	0.0357722	0.0175385
397.2	0.105747	0.0359578	0.0172857
397.4	0.106461	0.0364461	0.0172666
397.6	0.10723	0.0368182	0.017502
397.8	0.107596	0.0375648	0.0176152
398	0.10799	0.0380746	0.0168269
398.2	0.108327	0.0384318	0.0169557
398.4	0.108431	0.0385214	0.016742
398.6	0.109317	0.0388352	0.016539
398.8	0.10941	0.0388854	0.0167463
399	0.10959	0.0391094	0.0166774
399.2	0.109606	0.0395924	0.0169758
399.4	0.109948	0.0395589	0.0173147
399.6	0.110795	0.0398656	0.0177955
399.8	0.111051	0.0398884	0.0185003
400	0.110906	0.0397041	0.0187936
400.2	0.110683	0.0397971	0.019479
400.4	0.111126	0.0403205	0.0200252
400.6	0.110445	0.0403032	0.0204645
400.8	0.110054	0.0391003	0.0198842
401	0.109868	0.0395081	0.0201626
401.2	0.109619	0.0396785	0.0197271
401.4	0.110043	0.0399574	0.019879
401.6	0.110219	0.039991	0.0197929
401.8	0.109618	0.0393187	0.0190928
402	0.109383	0.038811	0.0188109
402.2	0.109175	0.0382668	0.0184104
402.4	0.109204	0.0379792	0.0182809
402.6	0.10938	0.0378367	0.0181778
402.8	0.10945	0.0378182	0.0181584
403	0.109401	0.037787	0.0180775
403.2	0.109603	0.0380181	0.0181273
403.4	0.109771	0.0376392	0.0184979
403.6	0.109997	0.0377422	0.0186209
403.8	0.109933	0.0377609	0.0185304
404	0.10973	0.0375588	0.0184865
404.2	0.109862	0.0377937	0.0192969
404.4	0.110004	0.0379529	0.018906
404.6	0.10996	0.0376286	0.0188203
404.8	0.110117	0.0374026	0.0188381
405	0.110033	0.0382367	0.0191646
405.2	0.109948	0.038491	0.0191033
405.4	0.110098	0.038765	0.0193571
405.6	0.109611	0.0381644	0.0188565
405.8	0.109475	0.0375879	0.0185952
406	0.109989	0.0373536	0.0187948
406.2	0.110351	0.0375558	0.0188479
406.4	0.110688	0.0381559	0.0196106
406.6	0.110701	0.0383301	0.0195466
406.8	0.111582	0.039023	0.0201901
407	0.111596	0.0396765	0.0205559
407.2	0.11152	0.0397621	0.0204394
407.4	0.111716	0.0395147	0.0204889
407.6	0.111922	0.0398738	0.0205939
407.8	0.111986	0.0400945	0.0203962
408	0.112054	0.0398513	0.0204102
408.2	0.112181	0.0398703	0.0206428
408.4	0.11247	0.0394232	0.0201844
408.6	0.112165	0.0390382	0.0200525
408.8	0.111722	0.0392909	0.0201955
409	0.111593	0.0398043	0.0198791
409.2	0.111557	0.0398122	0.019795
409.4	0.111622	0.0399534	0.0193737
409.6	0.111989	0.0395635	0.0190504
409.8	0.112037	0.0392653	0.0190846
410	0.112117	0.0393206	0.0188438
410.2	0.112176	0.0394683	0.0188494
410.4	0.11282	0.0398335	0.0190186
410.6	0.112953	0.0401865	0.018748
410.8	0.113521	0.0408136	0.0191454
411	0.113614	0.0409572	0.0190496
411.2	0.113724	0.0409059	0.0188702
411.4	0.114566	0.0409067	0.0192307
411.6	0.114432	0.0410351	0.0197365
411.8	0.11438	0.0407534	0.019292
412	0.114782	0.0405687	0.0194745
412.2	0.114713	0.0407346	0.0196941
412.4	0.11414	0.0402953	0.01906
412.6	0.114096	0.0405126	0.0190985
412.8	0.114182	0.040712	0.0193443
413	0.114299	0.0406042	0.0196627
413.2	0.114214	0.0405413	0.0192166
413.4	0.114544	0.040742	0.0191382
413.6	0.115134	0.0404804	0.0193886
413.8	0.114498	0.0397062	0.0190447
414	0.114799	0.0399188	0.0190676
414.2	0.114706	0.0394641	0.0191051
414.4	0.114991	0.0395405	0.0191038
414.6	0.114709	0.0396312	0.0193241
414.8	0.115105	0.0397392	0.0196153
415	0.115103	0.039628	0.0197793
415.2	0.114822	0.0395992	0.0200204
415.4	0.115128	0.0393731	0.0200215
415.6	0.11481	0.0393954	0.0198097
415.8	0.11449	0.0395911	0.0191977
416	0.114775	0.039884	0.0193094
416.2	0.114414	0.0402937	0.0189193
416.4	0.114044	0.0400757	0.0183411
416.6	0.114991	0.0409947	0.0190758
416.8	0.114786	0.0413548	0.0194341
417	0.115296	0.0413874	0.0199747
417.2	0.115931	0.0417428	0.0196006
417.4	0.116336	0.0418618	0.0199947
417.6	0.116506	0.0416571	0.0202721
417.8	0.116198	0.0413324	0.0196306
418	0.116609	0.0419425	0.0198498
418.2	0.116321	0.0416902	0.0194501
418.4	0.116807	0.0418609	0.0194621
418.6	0.116831	0.0414789	0.019533
418.8	0.116734	0.0411311	0.0190005
419	0.116674	0.0405491	0.0191342
419.2	0.116578	0.0402449	0.0188804
419.4	0.116799	0.0404258	0.0183762
419.6	0.116443	0.0402667	0.0181495
419.8	0.116292	0.0404658	0.017932
420	0.116413	0.0404967	0.0178795
420.2	0.115969	0.0406138	0.0178625
420.4	0.116065	0.0406137	0.0183636
420.6	0.116523	0.0409537	0.018975
420.8	0.116245	0.041027	0.019015
421	0.116921	0.0411334	0.0196792
421.2	0.116621	0.0410362	0.0194016
421.4	0.116698	0.0413212	0.0193044
421.6	0.11689	0.0415059	0.0195247
421.8	0.117235	0.0418645	0.0193094
422	0.117509	0.0418569	0.0195954
422.2	0.117819	0.0421711	0.0198806
422.4	0.117359	0.0419212	0.0199656
422.6	0.1172	0.0411202	0.0195918
422.8	0.117265	0.041079	0.0195893
423	0.117671	0.0414012	0.020525
423.2	0.11758	0.0417868	0.0204921
423.4	0.117842	0.0420589	0.0203485
423.6	0.118067	0.0419955	0.0204565
423.8	0.118455	0.0423222	0.0208565
424	0.118351	0.0421477	0.0207801
424.2	0.118356	0.0422605	0.0208441
424.4	0.118688	0.0420639	0.0205826
424.6	0.118834	0.0423864	0.0204056
424.8	0.118934	0.0427604	0.0201643
425	0.119311	0.0430586	0.0204044
425.2	0.119413	0.0429017	0.0203082
425.4	0.119301	0.0428176	0.0203851
425.6	0.119918	0.0433159	0.0208357
425.8	0.120233	0.0434395	0.0209453
426	0.120667	0.0432133	0.0212399
426.2	0.120668	0.0434123	0.021658
426.4	0.1202	0.04308	0.0213533
426.6	0.120302	0.0428856	0.0214592
426.8	0.120565	0.0432818	0.0220092
427	0.120453	0.0431328	0.0224461
427.2	0.120574	0.0427977	0.0221767
427.4	0.120626	0.0421269	0.0224489
427.6	0.12073	0.041767	0.022355
427.8	0.120862	0.0417108	0.0222888
428	0.121148	0.0414065	0.0219538
428.2	0.121032	0.0412313	0.021728
428.4	0.120788	0.0409198	0.0210083
428.6	0.120469	0.0414814	0.0208564
428.8	0.119994	0.0414046	0.0207832
429	0.120171	0.0415563	0.0210438
429.2	0.120296	0.0414474	0.0212274
429.4	0.120261	0.0416891	0.0211157
429.6	0.120831	0.0426014	0.0211534
429.8	0.121116	0.0430491	0.0212148
430	0.121538	0.0432017	0.021084
430.2	0.121307	0.0433092	0.0207917
430.4	0.121765	0.0437785	0.020769
430.6	0.121325	0.0437359	0.0207508
430.8	0.12166	0.0441553	0.0212286
431	0.121593	0.0440351	0.0213952
431.2	0.121891	0.0447556	0.0217154
431.4	0.121362	0.0444663	0.0216387
431.6	0.121057	0.0446353	0.0209279
431.8	0.121073	0.0447235	0.0207141
432	0.121135	0.0447501	0.0206837
432.2	0.12076	0.0446389	0.0204574
432.4	0.120616	0.0446417	0.0203017
432.6	0.120403	0.0450519	0.0203889
432.8	0.120854	0.0453086	0.0208412
433	0.121347	0.0454425	0.0212283
433.2	0.121175	0.0449778	0.0214424
433.4	0.121423	0.0451101	0.0214177
433.6	0.121682	0.0450297	0.0216135
433.8	0.121799	0.0446476	0.0211874
434	0.121379	0.0437594	0.0208962
434.2	0.121422	0.0432144	0.0208037
434.4	0.121846	0.0430837	0.0206993
434.6	0.121348	0.0428914	0.0205211
434.8	0.121384	0.0429506	0.0208042
435	0.120944	0.042749	0.0205434
435.2	0.120429	0.0428978	0.0202926
435.4	0.119834	0.0422602	0.0196247
435.6	0.119313	0.0416354	0.018657
435.8	0.119317	0.0412782	0.0182139
436	0.119526	0.0413937	0.0181402
436.2	0.119911	0.0411702	0.0178001
436.4	0.120246	0.0413948	0.0180101
436.6	0.12061	0.0418486	0.0186596
436.8	0.120889	0.0421542	0.018983
437	0.121516	0.0425426	0.0199999
437.2	0.122301	0.0429471	0.0203727
437.4	0.122728	0.0432571	0.0205567
437.6	0.122318	0.0430068	0.0205586
437.8	0.12223	0.0433858	0.0208229
438	0.122433	0.0433879	0.0211084
438.2	0.123123	0.0441809	0.0216981
438.4	0.123498	0.0448479	0.0218714
438.6	0.123452	0.0450284	0.0222389
438.8	0.123597	0.0453592	0.0225995
439	0.123419	0.0451478	0.0225697
439.2	0.123799	0.0454118	0.0224375
439.4	0.123796	0.0452091	0.0220312
439.6	0.123916	0.0449826	0.021542
439.8	0.124178	0.0450825	0.0216753
440	0.124148	0.0448648	0.0216261
440.2	0.12455	0.0445084	0.0209606
440.4	0.124608	0.0441732	0.0208972
440.6	0.124482	0.044349	0.0209167
440.8	0.124494	0.0447563	0.020405
441	0.124993	0.0452872	0.0205127
441.2	0.124589	0.0450786	0.0199987
441.4	0.124301	0.0451181	0.0200243
441.6	0.123838	0.0452493	0.0201235
441.8	0.124064	0.045692	0.0202596
442	0.123967	0.0461589	0.0198502
442.2	0.123942	0.0465318	0.019971
442.4	0.123892	0.0461828	0.0200327
442.6	0.123927	0.0456377	0.0200755
442.8	0.124105	0.0454626	0.0204982
443	0.123907	0.0452144	0.020782
443.2	0.12429	0.0458566	0.0211125
443.4	0.124613	0.0459289	0.0214386
443.6	0.124988	0.0461467	0.0219977
443.8	0.125425	0.0461863	0.0221061
444	0.125256	0.0456412	0.0217311
444.2	0.125723	0.0459541	0.0217746
444.4	0.125479	0.0459672	0.0217548
444.6	0.125816	0.0463802	0.0220739
444.8	0.125887	0.0464455	0.0220848
445	0.125914	0.0462134	0.0216124
445.2	0.125912	0.0462214	0.0214551
445.4	0.126254	0.0466377	0.0217836
445.6	0.126001	0.0463463	0.0213516
445.8	0.126237	0.0468755	0.020516
446	0.126326	0.0473282	0.0204602
446.2	0.126685	0.0470877	0.0210728
446.4	0.126993	0.0468849	0.0220207
446.6	0.126469	0.0464298	0.0222443
446.8	0.126266	0.0464731	0.0224597
447	0.126379	0.0468226	0.0226974
447.2	0.127021	0.0466524	0.0229081
447.4	0.127662	0.0467377	0.0227688
447.6	0.127778	0.0469008	0.0228071
447.8	0.128438	0.0469905	0.0229128
448	0.128513	0.0472579	0.022878
448.2	0.128302	0.0470505	0.0228431
448.4	0.128364	0.046821	0.0225883
448.6	0.128973	0.0466602	0.0232484
448.8	0.128591	0.0464228	0.0230899
449	0.128382	0.045499	0.0223495
449.2	0.128186	0.0451872	0.0222035
449.4	0.128317	0.0453599	0.0221874
449.6	0.128161	0.0457559	0.0219533
449.8	0.12849	0.0462808	0.022419
450	0.128524	0.0462471	0.0226924
450.2	0.128243	0.0459131	0.0229884
450.4	0.12784	0.0454962	0.0225537
450.6	0.126907	0.0451127	0.0217816
450.8	0.127101	0.044963	0.0216501
451	0.127165	0.0447557	0.0219459
451.2	0.126643	0.0442628	0.0216838
451.4	0.126402	0.044696	0.0215475
451.6	0.126868	0.0450153	0.0219218
451.8	0.127522	0.0454943	0.0227956
452	0.127603	0.0460709	0.0227007
452.2	0.127556	0.0457588	0.0229991
452.4	0.128586	0.0464351	0.0236053
452.6	0.128928	0.0464353	0.0240165
452.8	0.128586	0.046171	0.0234552
453	0.128485	0.0456085	0.023035
453.2	0.128693	0.0460326	0.0233332
453.4	0.128754	0.0463627	0.0233549
453.6	0.128762	0.0462402	0.0230096
453.8	0.128793	0.0460103	0.0231336
454	0.12871	0.046082	0.0220984
454.2	0.128078	0.0459907	0.0217611
454.4	0.12764	0.0455987	0.0208443
454.6	0.127455	0.0455676	0.0206385
454.8	0.127195	0.0453006	0.0206648
455	0.126429	0.0448348	0.0202526
455.2	0.126054	0.0445214	0.0197313
455.4	0.12669	0.0451219	0.0196548
455.6	0.127279	0.0454949	0.0200895
455.8	0.127538	0.0462731	0.0205425
456	0.128064	0.0464458	0.0205801
456.2	0.128707	0.046639	0.0207626
456.4	0.129444	0.0470262	0.0209763
456.6	0.129564	0.0468028	0.0209789
456.8	0.129816	0.0469713	0.0209206
457	0.129916	0.0466819	0.0212528
457.2	0.130196	0.0465243	0.0216362
457.4	0.130069	0.0466958	0.0215937
457.6	0.130147	0.0468424	0.0217639
457.8	0.13016	0.0473732	0.0228337
458	0.130598	0.0479748	0.0229685
458.2	0.130227	0.0479714	0.0235464
458.4	0.130422	0.0475909	0.0235598
458.6	0.130894	0.0480397	0.0239242
458.8	0.130426	0.0479107	0.02369
459	0.13028	0.0474178	0.0236104
459.2	0.130518	0.0473406	0.0233427
459.4	0.130417	0.04775	0.0231333
459.6	0.130463	0.0475298	0.0231487
459.8	0.13028	0.0473573	0.0227141
460	0.130208	0.046862	0.0221133
460.2	0.130178	0.0471173	0.0217676
460.4	0.130762	0.0473784	0.0220428
460.6	0.130555	0.0469598	0.0214768
460.8	0.131006	0.047006	0.021049
461	0.130806	0.0462556	0.0211412
461.2	0.131153	0.0464791	0.0214052
461.4	0.131288	0.0470539	0.0213635
461.6	0.131194	0.0475004	0.0216495
461.8	0.131196	0.0479814	0.0222975
462	0.131635	0.0483913	0.0226322
462.2	0.131576	0.0484144	0.02289
462.4	0.13165	0.0486233	0.022774
462.6	0.131787	0.0491215	0.0229586
462.8	0.131771	0.0490633	0.022876
463	0.131932	0.0487486	0.022736
463.2	0.131935	0.0485774	0.0225939
463.4	0.13169	0.0484166	0.022343
463.6	0.132219	0.0481601	0.0221938
463.8	0.131878	0.0478711	0.0218604
464	0.131741	0.0478827	0.0217875
464.2	0.132267	0.0481771	0.0222745
464.4	0.132608	0.047896	0.0224707
464.6	0.132807	0.0478593	0.0223942
464.8	0.133146	0.0476259	0.0223692
465	0.132735	0.047336	0.0228426
465.2	0.132793	0.0479381	0.0229019
465.4	0.132503	0.0482742	0.0228533
465.6	0.131883	0.0487166	0.0233472
465.8	0.131995	0.0486818	0.0233401
466	0.131826	0.0490967	0.0234158
466.2	0.131736	0.0489207	0.0233039
466.4	0.132015	0.0496509	0.0236084
466.6	0.132373	0.0498121	0.0237126
466.8	0.132575	0.0497427	0.023707
467	0.132301	0.0494794	0.0234176
467.2	0.1326	0.0494747	0.0238668
467.4	0.132671	0.0493494	0.0235328
467.6	0.133246	0.049203	0.0233772
467.8	0.133309	0.0494619	0.0234483
468	0.133412	0.0498351	0.0237682
468.2	0.134211	0.0498157	0.0236271
468.4	0.134702	0.049868	0.0237335
468.6	0.135121	0.0498176	0.0234664
468.8	0.134704	0.0497109	0.0231643
469	0.134724	0.0496806	0.0233649
469.2	0.135096	0.0501361	0.023424
469.4	0.134987	0.0496789	0.0234969
469.6	0.135087	0.049555	0.0237461
469.8	0.135549	0.0496806	0.0235084
470	0.135159	0.0497504	0.0238094
470.2	0.135376	0.0493949	0.0240451
470.4	0.135551	0.0497261	0.0246454
470.6	0.13558	0.0494372	0.0248863
470.8	0.135743	0.0495794	0.0252535
471	0.135271	0.0491786	0.0250415
471.2	0.135337	0.0492851	0.0254301
471.4	0.135245	0.0492301	0.0250284
471.6	0.134976	0.0498366	0.0251913
471.8	0.134783	0.0505475	0.0252866
472	0.134864	0.0504894	0.0251208
472.2	0.135532	0.0504478	0.024987
472.4	0.135562	0.0506931	0.0248188
472.6	0.135219	0.0504197	0.0242081
472.8	0.134839	0.050317	0.0237109
473	0.134931	0.0502447	0.0233764
473.2	0.135633	0.0503985	0.0236061
473.4	0.135654	0.0495781	0.0232072
473.6	0.136063	0.0500314	0.0232908
473.8	0.135683	0.0496843	0.0228131
474	0.135276	0.0494346	0.0230545
474.2	0.135198	0.0495213	0.0230433
474.4	0.135187	0.0501574	0.0233599
474.6	0.135129	0.0504052	0.0230421
474.8	0.135255	0.0504613	0.0228818
475	0.13494	0.0504037	0.0231465
475.2	0.135045	0.051099	0.0238716
475.4	0.134667	0.0511186	0.0236678
475.6	0.134207	0.0514001	0.0240585
475.8	0.133842	0.0507662	0.0238447
476	0.133881	0.0503179	0.0237707
476.2	0.133933	0.0501888	0.0239769
476.4	0.133364	0.0501028	0.023195
476.6	0.133233	0.0496216	0.022578
476.8	0.133843	0.0490123	0.0218338
477	0.134028	0.0487335	0.0217355
477.2	0.13513	0.0482893	0.0223281
477.4	0.135374	0.0483926	0.0222097
477.6	0.13559	0.048504	0.0222569
477.8	0.135725	0.0481188	0.0224388
478	0.136081	0.0487502	0.0228449
478.2	0.136584	0.0492521	0.0230283
478.4	0.13689	0.0497065	0.0233974
478.6	0.137308	0.0502527	0.0238451
478.8	0.138108	0.0506184	0.0244308
479	0.137905	0.0509282	0.0249952
479.2	0.138038	0.0515633	0.0250049
479.4	0.138051	0.0513768	0.0252206
479.6	0.137882	0.0515736	0.0258336
479.8	0.137313	0.0510619	0.0254239
480	0.137034	0.0507097	0.0250511
480.2	0.137085	0.0508598	0.0246836
480.4	0.13693	0.0507893	0.0238923
480.6	0.137288	0.0503332	0.023554
480.8	0.137522	0.0499876	0.0232706
481	0.136851	0.0496431	0.0233195
481.2	0.136879	0.0493472	0.0233802
481.4	0.136268	0.049792	0.022917
481.6	0.135872	0.049187	0.0228459
481.8	0.136182	0.0493651	0.0234481
482	0.136322	0.0494909	0.0232535
482.2	0.136374	0.0492121	0.0231851
482.4	0.136212	0.049266	0.0230725
482.6	0.136531	0.0496791	0.0230345
482.8	0.136897	0.0497186	0.0228402
483	0.136724	0.0497167	0.0227697
483.2	0.137136	0.0497668	0.0227922
483.4	0.137485	0.0494735	0.0232452
483.6	0.137147	0.0492419	0.0231187
483.8	0.137147	0.048623	0.0225122
484	0.137114	0.0486488	0.0222206
484.2	0.137689	0.0492356	0.0219335
484.4	0.137822	0.0497476	0.0219037
484.6	0.138351	0.0500147	0.0219639
484.8	0.1385	0.0503386	0.0223409
485	0.1387	0.0507638	0.0227446
485.2	0.139059	0.0507111	0.0226396
485.4	0.138885	0.0513541	0.0226265
485.6	0.139088	0.0512316	0.0231308
485.8	0.139407	0.0514151	0.0232598
486	0.139308	0.0510772	0.0226441
486.2	0.139364	0.0507067	0.0227572
486.4	0.139538	0.0507239	0.0228931
486.6	0.13999	0.0509493	0.0234892
486.8	0.139754	0.0512153	0.0238528
487	0.13905	0.0509755	0.0239995
487.2	0.138855	0.0505632	0.0237922
487.4	0.13878	0.0503934	0.0236958
487.6	0.138839	0.0502418	0.0236365
487.8	0.138784	0.0499123	0.0229014
488	0.138879	0.0503635	0.0228508
488.2	0.139611	0.0513833	0.0230597
488.4	0.139919	0.0517302	0.0236586
488.6	0.140623	0.0517615	0.0241513
488.8	0.14047	0.0516895	0.0240964
489	0.140723	0.0516128	0.0238952
489.2	0.140806	0.0509894	0.023431
489.4	0.140589	0.0510065	0.0233627
489.6	0.140704	0.0509597	0.0234895
489.8	0.14091	0.0505608	0.0234977
490	0.141293	0.0504205	0.0236556
490.2	0.141397	0.0502242	0.0238142
490.4	0.140891	0.0502684	0.023555
490.6	0.140403	0.0503362	0.0236109
490.8	0.140164	0.0512551	0.0238261
491	0.139897	0.0514163	0.0237615
491.2	0.139878	0.0516532	0.0236681
491.4	0.13992	0.0516484	0.0236762
491.6	0.139971	0.0512658	0.0235227
491.8	0.140014	0.0514007	0.0234451
492	0.140518	0.0521402	0.0240298
492.2	0.140527	0.0527115	0.0240823
492.4	0.140969	0.0531997	0.0246083
492.6	0.141015	0.0531119	0.0244076
492.8	0.140727	0.0528557	0.0240003
493	0.140975	0.0530065	0.0239328
493.2	0.14176	0.0533991	0.0246132
493.4	0.142105	0.0535594	0.0250657
493.6	0.142166	0.0535132	0.0252307
493.8	0.142367	0.0529734	0.025072
494	0.142426	0.0531986	0.0249262
494.2	0.14214	0.0528865	0.0244827
494.4	0.142085	0.05301	0.0246311
494.6	0.141948	0.0528229	0.0247589
494.8	0.142296	0.0533779	0.02492
495	0.141893	0.0531221	0.0246733
495.2	0.141576	0.0531597	0.0244942
495.4	0.141281	0.0526184	0.0243058
495.6	0.141093	0.0519764	0.0238611
495.8	0.141786	0.0528643	0.0242549
496	0.141858	0.0531394	0.0238319
496.2	0.142169	0.0533346	0.0237629
496.4	0.142525	0.053715	0.0240815
496.6	0.142183	0.0536185	0.0234512
496.8	0.141877	0.0538848	0.0229262
497	0.14221	0.0539971	0.0231554
497.2	0.142906	0.054469	0.0239547
497.4	0.142814	0.0538192	0.0242159
497.6	0.143207	0.0534907	0.0244124
497.8	0.143314	0.0529521	0.0242117
498	0.143072	0.0525539	0.0240804
498.2	0.143407	0.0525757	0.0246483
498.4	0.143239	0.0524317	0.0252769
498.6	0.14298	0.0521029	0.0249268
498.8	0.14318	0.0525657	0.0251487
499	0.142769	0.0524725	0.0251367
499.2	0.142588	0.0524819	0.0249216
499.4	0.142324	0.0524106	0.0249824
499.6	0.14241	0.0523841	0.0251923
499.8	0.142767	0.05304	0.0252116
500	0.142403	0.05314	0.0248332
500.2	0.142769	0.053295	0.0248085
500.4	0.142797	0.0536277	0.0250869
500.6	0.142782	0.0537759	0.0245663
500.8	0.143273	0.0539492	0.0245676
501	0.143217	0.0535074	0.0245607
501.2	0.143519	0.0537414	0.024798
501.4	0.143635	0.0530509	0.0249242
501.6	0.143779	0.0529058	0.0248951
501.8	0.14391	0.0528916	0.0245428
502	0.143761	0.0531233	0.0246252
502.2	0.14426	0.0536831	0.0253223
502.4	0.14404	0.0540065	0.0256315
502.6	0.143913	0.0539944	0.0255803
502.8	0.143978	0.0544453	0.0259594
503	0.143618	0.0542735	0.0255697
503.2	0.143709	0.0543741	0.025472
503.4	0.143774	0.0548681	0.0257885
503.6	0.144077	0.0547889	0.0260623
503.8	0.144275	0.0551724	0.0259771
504	0.144162	0.0550546	0.0257976
504.2	0.144815	0.0546623	0.0257774
504.4	0.144924	0.0548793	0.0260861
504.6	0.144462	0.0544837	0.0252907
504.8	0.144868	0.0550976	0.0251401
505	0.144064	0.0549624	0.0247446
505.2	0.144408	0.0554935	0.0251792
505.4	0.144315	0.0550924	0.0250615
505.6	0.144731	0.0554666	0.0252767
505.8	0.145143	0.0555762	0.0248724
506	0.145392	0.0558226	0.0252704
506.2	0.145701	0.055943	0.0258802
506.4	0.145749	0.0560882	0.0265002
506.6	0.145509	0.0561065	0.0266542
506.8	0.145678	0.0564253	0.0263846
507	0.145335	0.05598	0.0258351
507.2	0.145311	0.0559695	0.0256601
507.4	0.145856	0.0564611	0.0262889
507.6	0.146023	0.0559036	0.0261023
507.8	0.145528	0.0558081	0.0258316
508	0.14527	0.0553155	0.0253185
508.2	0.145795	0.0550897	0.0253372
508.4	0.145343	0.0550685	0.0250129
508.6	0.145468	0.054709	0.024951
508.8	0.145618	0.0550165	0.02509
509	0.145243	0.0546843	0.0252634
509.2	0.145636	0.0545641	0.0250545
509.4	0.145873	0.0543032	0.0248032
509.6	0.146317	0.0545288	0.0248958
509.8	0.146106	0.0540675	0.0244885
510	0.146662	0.0546698	0.0254743
510.2	0.146684	0.0545565	0.0256881
510.4	0.146386	0.0554529	0.0262167
510.6	0.146546	0.0562306	0.026219
510.8	0.146093	0.0563033	0.0258443
511	0.145838	0.0562088	0.0255713
511.2	0.146364	0.0569854	0.026175
511.4	0.147038	0.0574173	0.0266664
511.6	0.146873	0.0571426	0.0261057
511.8	0.147003	0.0574992	0.0259797
512	0.147481	0.0578342	0.0262948
512.2	0.147756	0.0574157	0.0262624
512.4	0.14759	0.0571752	0.0262359
512.6	0.147776	0.0569806	0.0263297
512.8	0.147703	0.0567969	0.0264093
513	0.14753	0.0564923	0.0266013
513.2	0.147407	0.0563549	0.0258512
513.4	0.147501	0.0561673	0.0258123
513.6	0.147971	0.0559032	0.0260596
513.8	0.14784	0.055477	0.0259616
514	0.148041	0.0557673	0.0259653
514.2	0.148176	0.0562058	0.0261159
514.4	0.148144	0.0568213	0.026572
514.6	0.148493	0.056645	0.0265917
514.8	0.147958	0.0565316	0.0261324
515	0.148537	0.0563302	0.0260585
515.2	0.148725	0.0567735	0.0269968
515.4	0.148673	0.0567638	0.0268271
515.6	0.148849	0.0567482	0.0269136
515.8	0.149082	0.0573333	0.0276885
516	0.149393	0.0575547	0.0283077
516.2	0.1493	0.0574723	0.028166
516.4	0.149027	0.0575985	0.0282017
516.6	0.148765	0.0579344	0.0283796
516.8	0.149485	0.0580932	0.0288025
517	0.149581	0.0584302	0.0286278
517.2	0.150117	0.058556	0.0282228
517.4	0.150857	0.0581744	0.0281004
517.6	0.151177	0.0582658	0.0278303
517.8	0.15147	0.0583004	0.0271349
518	0.151427	0.0584746	0.026469
518.2	0.151385	0.0585213	0.0265004
518.4	0.15045	0.0577527	0.0255446
518.6	0.150007	0.0573657	0.0253172
518.8	0.149765	0.0573628	0.0244421
519	0.149817	0.0568024	0.0245773
519.2	0.149453	0.0566877	0.0250774
519.4	0.149546	0.056377	0.0249873
519.6	0.149621	0.0562519	0.0255397
519.8	0.149096	0.0559196	0.0257541
520	0.149078	0.055399	0.0256954
520.2	0.148453	0.0553339	0.0256893
520.4	0.148455	0.055535	0.0262705
520.6	0.149025	0.0555775	0.0266379
520.8	0.1497	0.0557762	0.0266489
521	0.149628	0.0557908	0.0263102
521.2	0.150007	0.0559103	0.026388
521.4	0.150416	0.0557144	0.026437
521.6	0.150739	0.0562796	0.026427
521.8	0.151636	0.0565639	0.0264079
522	0.151223	0.0567778	0.0264591
522.2	0.151351	0.0571286	0.0266051
522.4	0.151301	0.0570527	0.0266131
522.6	0.151716	0.0575266	0.0268204
522.8	0.152198	0.0580669	0.0268416
523	0.152385	0.0580325	0.0271825
523.2	0.152425	0.0582529	0.0273807
523.4	0.152744	0.058263	0.0273335
523.6	0.152334	0.0583607	0.027505
523.8	0.151916	0.0578692	0.0273753
524	0.152279	0.0579479	0.0275276
524.2	0.152205	0.058298	0.0276177
524.4	0.152531	0.0584376	0.0278224
524.6	0.152537	0.0586747	0.0276879
524.8	0.152447	0.0591128	0.0278298
525	0.152297	0.0591729	0.0277729
525.2	0.152148	0.059434	0.0278878
525.4	0.152084	0.0589514	0.0280409
525.6	0.151853	0.0590944	0.0277567
525.8	0.15215	0.0592903	0.0280185
526	0.151629	0.0591741	0.0281657
526.2	0.152113	0.0595838	0.0286278
526.4	0.151303	0.0594236	0.0285963
526.6	0.151215	0.0599105	0.0286866
526.8	0.151132	0.0601422	0.0285831
527	0.15106	0.0600077	0.028106
527.2	0.151167	0.0601108	0.0279161
527.4	0.151415	0.0602815	0.0277671
527.6	0.150857	0.059657	0.0272932
527.8	0.150879	0.0591974	0.0267689
528	0.151038	0.058744	0.0262014
528.2	0.150699	0.0585043	0.0260409
528.4	0.151037	0.0585178	0.026438
528.6	0.151226	0.0590436	0.026829
528.8	0.151302	0.0588896	0.0269437
529	0.151174	0.0585939	0.0268491
529.2	0.151514	0.0584246	0.0268531
529.4	0.151988	0.0579891	0.0269185
529.6	0.152117	0.0575997	0.0267773
529.8	0.15244	0.0575113	0.0272307
530	0.152494	0.0574166	0.0271915
530.2	0.153433	0.0579546	0.0278289
530.4	0.153044	0.0581133	0.0280264
530.6	0.153638	0.0581522	0.0283225
530.8	0.153634	0.0583031	0.0284174
531	0.153839	0.0581179	0.028386
531.2	0.15347	0.0579354	0.0279011
531.4	0.153149	0.0577264	0.027858
531.6	0.152882	0.0573878	0.0275699
531.8	0.152714	0.0573261	0.0275571
532	0.152421	0.0574631	0.0278626
532.2	0.15257	0.0577466	0.0282445
532.4	0.152899	0.0582612	0.0287577
532.6	0.152522	0.0582518	0.0281543
532.8	0.152279	0.05784	0.0278257
533	0.152479	0.0583056	0.0275717
533.2	0.152867	0.0588096	0.0274079
533.4	0.15274	0.0585827	0.0269012
533.6	0.152738	0.0584298	0.0270745
533.8	0.153269	0.058821	0.0273904
534	0.15335	0.059204	0.0273839
534.2	0.15377	0.0598559	0.0275134
534.4	0.153024	0.0598206	0.027331
534.6	0.153472	0.0597478	0.0273672
534.8	0.153245	0.0599166	0.0273649
535	0.153016	0.0599142	0.0269266
535.2	0.153365	0.0602317	0.0269833
535.4	0.153793	0.0606471	0.0274168
535.6	0.154651	0.0611809	0.0280334
535.8	0.154416	0.060502	0.0279641
536	0.154947	0.0607538	0.0280765
536.2	0.155423	0.0606985	0.0279462
536.4	0.155115	0.0601908	0.0276817
536.6	0.155084	0.0599357	0.0273033
536.8	0.155541	0.0603959	0.0278103
537	0.155794	0.0608994	0.0276385
537.2	0.15573	0.0605536	0.0276591
537.4	0.15608	0.0602274	0.0281124
537.6	0.156233	0.0604853	0.0289206
537.8	0.15612	0.0606901	0.0292619
538	0.155202	0.0607714	0.0290237
538.2	0.154701	0.0605846	0.0283679
538.4	0.154284	0.0602081	0.0284046
538.6	0.154733	0.0603296	0.0287771
538.8	0.154525	0.0606152	0.0289706
539	0.154923	0.0612932	0.0296739
539.2	0.155179	0.0615758	0.0300148
539.4	0.155132	0.0615323	0.030102
539.6	0.155643	0.061878	0.0304546
539.8	0.155291	0.0615802	0.0301863
540	0.155954	0.0621501	0.0304102
540.2	0.156239	0.0620298	0.0306118
540.4	0.156763	0.0618291	0.0307009
540.6	0.15697	0.0618985	0.0307837
540.8	0.157342	0.0619017	0.030803
541	0.156867	0.0612885	0.0300386
541.2	0.156463	0.0607892	0.0295319
541.4	0.156715	0.0606916	0.0297824
541.6	0.156166	0.0603013	0.0292554
541.8	0.15535	0.0599141	0.0287
542	0.155111	0.0593868	0.0280593
542.2	0.154651	0.0587091	0.0276215
542.4	0.155132	0.0589991	0.0282394
542.6	0.155512	0.0593949	0.0285916
542.8	0.155874	0.0598266	0.0286264
543	0.15584	0.0602323	0.0285353
543.2	0.155627	0.0604584	0.0285414
543.4	0.15609	0.0611329	0.0290933
543.6	0.156198	0.0610694	0.0289466
543.8	0.156451	0.0611292	0.0287314
544	0.156592	0.0610917	0.028422
544.2	0.156675	0.0607947	0.0282158
544.4	0.157086	0.0607965	0.0284967
544.6	0.156652	0.0605592	0.0280277
544.8	0.15653	0.060134	0.0277749
545	0.156415	0.0598089	0.0271811
545.2	0.156235	0.0594527	0.0272042
545.4	0.156316	0.0594578	0.0275456
545.6	0.156052	0.0591483	0.0271189
545.8	0.155897	0.0593524	0.0271124
546	0.156318	0.0589512	0.0273928
546.2	0.156487	0.0592639	0.0276472
546.4	0.157562	0.0602597	0.0280709
546.6	0.158067	0.0608127	0.0283778
546.8	0.158278	0.0611536	0.0285557
547	0.158331	0.0611935	0.0287061
547.2	0.158522	0.0616521	0.0294218
547.4	0.158725	0.061709	0.0298022
547.6	0.158464	0.0612778	0.0290838
547.8	0.158736	0.061917	0.029178
548	0.158885	0.0623607	0.0295394
548.2	0.158984	0.0621809	0.0295774
548.4	0.159206	0.0621259	0.0297612
548.6	0.158919	0.0620434	0.0294226
548.8	0.158826	0.0617462	0.029633
549	0.159014	0.0620091	0.0298709
549.2	0.158704	0.0619459	0.0295583
549.4	0.158	0.0616212	0.0288272
549.6	0.157611	0.0615213	0.0282568
549.8	0.15748	0.0612698	0.0278848
550	0.157449	0.0608547	0.0278818
550.2	0.157092	0.0610203	0.027371
550.4	0.157453	0.0612183	0.0272171
550.6	0.157449	0.0611788	0.0271027
550.8	0.157082	0.0607452	0.0268106
551	0.157264	0.0604814	0.0268669
551.2	0.157202	0.0608367	0.0273309
551.4	0.157725	0.0613213	0.0276523
551.6	0.157676	0.06165	0.0274601
551.8	0.158047	0.0617728	0.0276906
552	0.158332	0.061878	0.0278672
552.2	0.158346	0.0617965	0.0281283
552.4	0.158916	0.0619439	0.0288321
552.6	0.159616	0.0621139	0.0296269
552.8	0.159852	0.062178	0.0300078
553	0.160076	0.0617985	0.0301589
553.2	0.159537	0.0613433	0.0298642
553.4	0.159535	0.0612129	0.0300746
553.6	0.160058	0.0613143	0.0305865
553.8	0.160289	0.0612943	0.030744
554	0.160346	0.0617431	0.030384
554.2	0.160158	0.0619155	0.0298165
554.4	0.160677	0.0623771	0.0299425
554.6	0.160697	0.0622378	0.0296851
554.8	0.160523	0.0622858	0.0295466
555	0.160508	0.0623222	0.0298807
555.2	0.160536	0.062796	0.0300876
555.4	0.161131	0.0634976	0.030267
555.6	0.160944	0.06348	0.0299261
555.8	0.160699	0.0629882	0.0293572
556	0.160257	0.0630895	0.0291089
556.2	0.160179	0.0628693	0.0288492
556.4	0.160603	0.0623247	0.0284406
556.6	0.160288	0.0620184	0.028272
556.8	0.159454	0.0614391	0.0274958
557	0.159008	0.0610566	0.0276379
557.2	0.158553	0.0610721	0.0273165
557.4	0.159546	0.0613817	0.0275251
557.6	0.159383	0.0612893	0.0274838
557.8	0.159316	0.0613172	0.0269262
558	0.159151	0.0613643	0.026529
558.2	0.159631	0.061749	0.027565
558.4	0.160215	0.0617597	0.0280833
558.6	0.160572	0.0614637	0.0283503
558.8	0.160642	0.061493	0.0288647
559	0.16111	0.0616404	0.0299242
559.2	0.161455	0.0622049	0.0304719
559.4	0.16155	0.0624537	0.0310059
559.6	0.161122	0.0625366	0.0303753
559.8	0.160393	0.0621648	0.0300483
560	0.159997	0.0622158	0.0297504
560.2	0.159353	0.0621816	0.0295495
560.4	0.159279	0.0620708	0.0291281
560.6	0.158798	0.0621223	0.0287348
560.8	0.158316	0.0624491	0.0286127
561	0.157985	0.0623506	0.0286615
561.2	0.158069	0.0624267	0.0281427
561.4	0.158607	0.062575	0.0282372
561.6	0.158475	0.0625473	0.028355
561.8	0.158792	0.0623045	0.0281519
562	0.158842	0.0622359	0.027728
562.2	0.159564	0.0625353	0.0285199
562.4	0.159751	0.0615752	0.0281634
562.6	0.160008	0.0610575	0.0280792
562.8	0.160233	0.0612653	0.0282404
563	0.160869	0.0614634	0.0287572
563.2	0.160389	0.0615611	0.0290818
563.4	0.160284	0.06158	0.0293858
563.6	0.160081	0.0617432	0.0294415
563.8	0.160132	0.0618809	0.0297503
564	0.160014	0.0617924	0.0297048
564.2	0.160056	0.0621096	0.0296561
564.4	0.160506	0.0620805	0.0290739
564.6	0.160937	0.0626754	0.0293551
564.8	0.160523	0.0630327	0.0296425
565	0.160537	0.0628454	0.0290897
565.2	0.160991	0.0636715	0.0291902
565.4	0.161284	0.0642402	0.0292692
565.6	0.161112	0.0643256	0.0292356
565.8	0.161315	0.0639698	0.0286872
566	0.16105	0.0632945	0.027891
566.2	0.161227	0.0634144	0.0284355
566.4	0.161072	0.0628638	0.0278609
566.6	0.160919	0.0629412	0.0277504
566.8	0.160474	0.0631246	0.0279797
567	0.160635	0.0631956	0.0284343
567.2	0.160345	0.0632297	0.0287872
567.4	0.160327	0.0632313	0.0287929
567.6	0.160219	0.0632407	0.0288702
567.8	0.160537	0.063222	0.0287828
568	0.160759	0.0631335	0.0289776
568.2	0.160613	0.0633823	0.0284719
568.4	0.160196	0.0632884	0.0282792
568.6	0.160635	0.0639274	0.0287819
568.8	0.160323	0.0641691	0.0288165
569	0.160406	0.0643643	0.0287307
569.2	0.160481	0.0648269	0.0293838
569.4	0.160862	0.0653426	0.0294351
569.6	0.160826	0.064755	0.0295889
569.8	0.161507	0.0645687	0.0293947
570	0.161228	0.0641765	0.0289792
570.2	0.161497	0.0645963	0.0293328
570.4	0.161452	0.0643864	0.0291255
570.6	0.161787	0.0646297	0.0295801
570.8	0.162078	0.0644627	0.0300159
571	0.162684	0.0641595	0.0300409
571.2	0.163165	0.0641793	0.0304054
571.4	0.163413	0.063746	0.0299045
571.6	0.163637	0.0631203	0.0295398
571.8	0.164187	0.0630033	0.0297941
572	0.164021	0.0627072	0.0301072
572.2	0.163411	0.0625123	0.0297701
572.4	0.163185	0.0623838	0.029808
572.6	0.163438	0.0625997	0.0296517
572.8	0.163633	0.0627811	0.030214
573	0.163739	0.062981	0.0308147
573.2	0.16374	0.0635869	0.0309177
573.4	0.16356	0.063907	0.0306586
573.6	0.162846	0.0636032	0.0302739
573.8	0.163077	0.064181	0.0300424
574	0.162676	0.0641126	0.0299881
574.2	0.162351	0.0640434	0.0300026
574.4	0.162433	0.0644781	0.029736
574.6	0.162692	0.0646796	0.0298569
574.8	0.16191	0.0638081	0.0296001
575	0.161801	0.0636628	0.0292992
575.2	0.1621	0.0643522	0.0297023
575.4	0.162233	0.0638395	0.0294167
575.6	0.162041	0.0637945	0.0294089
575.8	0.162173	0.0639476	0.029956
576	0.161759	0.0632582	0.0299449
576.2	0.16192	0.0628903	0.029517
576.4	0.162013	0.0627327	0.0292627
576.6	0.162988	0.0631075	0.0296039
576.8	0.163842	0.0637517	0.0305278
577	0.164053	0.0645266	0.0309788
577.2	0.164058	0.0646237	0.0305901
577.4	0.164006	0.0646026	0.0305744
577.6	0.164128	0.0649919	0.030642
577.8	0.16488	0.0652927	0.0310718
578	0.16492	0.0647836	0.0306908
578.2	0.164624	0.0643239	0.030257
578.4	0.165031	0.0646615	0.0302124
578.6	0.165198	0.0644186	0.0299917
578.8	0.164408	0.0640504	0.029945
579	0.164849	0.0646275	0.030055
579.2	0.164634	0.0646757	0.030283
579.4	0.164306	0.0643467	0.0300012
579.6	0.163689	0.0643165	0.0295427
579.8	0.163681	0.0642119	0.0296439
580	0.16374	0.0640198	0.0297216
580.2	0.163832	0.0637869	0.029256
580.4	0.163846	0.0643066	0.0291413
580.6	0.164161	0.0649646	0.0296325
580.8	0.164523	0.0653702	0.0296229
581	0.164507	0.0657969	0.0292378
581.2	0.164266	0.0655471	0.028847
581.4	0.164079	0.0660443	0.0290228
581.6	0.164482	0.0665848	0.0297059
581.8	0.164667	0.0664452	0.0299042
582	0.164726	0.0659871	0.0296667
582.2	0.164655	0.0661536	0.0298389
582.4	0.165026	0.066681	0.0301028
582.6	0.165189	0.0666165	0.0297056
582.8	0.164762	0.0660871	0.0300507
583	0.164573	0.0657607	0.0302285
583.2	0.164674	0.0660082	0.0307646
583.4	0.16459	0.0658045	0.0310201
583.6	0.164831	0.0658548	0.0313581
583.8	0.165167	0.0656888	0.0316111
584	0.165261	0.0654841	0.031646
584.2	0.165202	0.0650404	0.0310879
584.4	0.164848	0.0650219	0.0311488
584.6	0.164997	0.0649915	0.030967
584.8	0.165032	0.06466	0.0297982
585	0.164837	0.0647383	0.0298693
585.2	0.16483	0.0644647	0.0299548
585.4	0.165066	0.064551	0.0304439
585.6	0.165015	0.0648282	0.0304735
585.8	0.164984	0.0647383	0.0307262
586	0.165464	0.0651098	0.0307133
586.2	0.165575	0.0653183	0.030452
586.4	0.165853	0.0654081	0.0304158
586.6	0.165983	0.0650619	0.0302877
586.8	0.166102	0.0651928	0.0306587
587	0.166575	0.0658209	0.030925
587.2	0.166816	0.0660897	0.0308895
587.4	0.166708	0.0659382	0.0308277
587.6	0.167099	0.066364	0.0308192
587.8	0.16702	0.0662638	0.030573
588	0.166859	0.0664863	0.0302627
588.2	0.167131	0.066678	0.0305124
588.4	0.166423	0.0660483	0.0300771
588.6	0.166555	0.0661016	0.0298133
588.8	0.166115	0.0657946	0.0295529
589	0.166334	0.0657144	0.03017
589.2	0.165927	0.0654568	0.0299141
589.4	0.165714	0.0651597	0.0298202
589.6	0.165822	0.0653516	0.030035
589.8	0.166086	0.0650764	0.0305417
590	0.166087	0.064999	0.0305482
590.2	0.166027	0.0644867	0.0305918
590.4	0.165815	0.0646069	0.0313319
590.6	0.165581	0.0646725	0.031972
590.8	0.165677	0.0650839	0.0320809
591	0.165635	0.0658371	0.0323218
591.2	0.165114	0.065996	0.0322771
591.4	0.165205	0.0663851	0.0321567
591.6	0.165386	0.0667086	0.0320655
591.8	0.165473	0.0666835	0.0318917
592	0.165593	0.0673327	0.0319259
592.2	0.166082	0.0678191	0.0321658
592.4	0.165481	0.0672774	0.0314074
592.6	0.165687	0.0675072	0.0313095
592.8	0.166086	0.0673819	0.031321
593	0.166555	0.067099	0.0312168
593.2	0.166869	0.0671302	0.0312584
593.4	0.167397	0.0663388	0.0310272
593.6	0.167806	0.0663452	0.0313126
593.8	0.167468	0.0658556	0.0311882
594	0.167908	0.065994	0.031463
594.2	0.167692	0.0654997	0.0315537
594.4	0.167559	0.065603	0.0318304
594.6	0.167441	0.0652514	0.0315638
594.8	0.167639	0.06572	0.031737
595	0.167637	0.0662211	0.0315919
595.2	0.167617	0.0659026	0.0310558
595.4	0.167527	0.0660847	0.0304147
595.6	0.167402	0.0660998	0.0302859
595.8	0.167352	0.0662896	0.0301262
596	0.167168	0.0669457	0.0298354
596.2	0.167353	0.0675049	0.0300748
596.4	0.167422	0.0675246	0.030382
596.6	0.167592	0.0678757	0.0305277
596.8	0.167636	0.0679545	0.0306405
597	0.16816	0.0682989	0.031001
597.2	0.168255	0.0682815	0.0314349
597.4	0.168104	0.0682199	0.0313622
597.6	0.168061	0.0686872	0.031447
597.8	0.168403	0.0686473	0.0312506
598	0.168584	0.0685294	0.0314463
598.2	0.168072	0.0679617	0.0315037
598.4	0.167925	0.0675097	0.0313931
598.6	0.167749	0.0669505	0.0312051
598.8	0.168033	0.0669073	0.0315378
599	0.1681	0.0664867	0.0310159
599.2	0.168221	0.0661921	0.0306669
599.4	0.168025	0.0658197	0.0304318
599.6	0.16795	0.0654669	0.0302868
599.8	0.168677	0.0654598	0.030371
600	0.168951	0.0659753	0.0308715
600.2	0.169056	0.0662249	0.031249
600.4	0.169505	0.0665245	0.0314679
600.6	0.169166	0.0665325	0.0313893
600.8	0.169426	0.0669511	0.0316378
601	0.169872	0.0676045	0.032194
601.2	0.16992	0.0680039	0.0324922
601.4	0.16997	0.0684739	0.0325677
601.6	0.170328	0.0688952	0.0328161
601.8	0.17039	0.0689229	0.0328376
602	0.169729	0.068811	0.0328769
602.2	0.16948	0.0689531	0.0332253
602.4	0.169399	0.0687173	0.0331944
602.6	0.169378	0.068965	0.0330795
602.8	0.169687	0.0693048	0.0333682
603	0.169674	0.0695806	0.0334258
603.2	0.169946	0.0696892	0.0336206
603.4	0.169947	0.0695374	0.0334106
603.6	0.170049	0.0697804	0.0334457
603.8	0.17019	0.0698248	0.0332344
604	0.170073	0.0698422	0.0333434
604.2	0.169755	0.0694646	0.032783
604.4	0.170345	0.0697879	0.0328367
604.6	0.169847	0.0697422	0.0323707
604.8	0.170128	0.0697254	0.0320414
605	0.170337	0.0694124	0.0318076
605.2	0.170387	0.0693576	0.0312415
605.4	0.170266	0.0691424	0.0309209
605.6	0.169778	0.069042	0.030557
605.8	0.169449	0.068722	0.030051
606	0.169108	0.0682618	0.0297306
606.2	0.169227	0.0682814	0.0299353
606.4	0.169154	0.0680903	0.0299313
606.6	0.169383	0.0680967	0.0298217
606.8	0.169712	0.0682751	0.0302636
607	0.169683	0.0678501	0.0302671
607.2	0.170267	0.0683818	0.0309353
607.4	0.170689	0.068721	0.0310651
607.6	0.170417	0.0687025	0.0310831
607.8	0.17023	0.0683092	0.0310114
608	0.170819	0.0681975	0.0315913
608.2	0.170549	0.0679295	0.0314843
608.4	0.170428	0.0680891	0.0317712
608.6	0.170509	0.0683321	0.0318022
608.8	0.170726	0.068153	0.0317859
609	0.170767	0.0681525	0.0317499
609.2	0.170494	0.0684076	0.0310777
609.4	0.170669	0.0688027	0.0313578
609.6	0.170559	0.0688943	0.0312233
609.8	0.170933	0.0687968	0.0311632
610	0.171155	0.0688047	0.0314031
610.2	0.171426	0.0690945	0.0312135
610.4	0.171361	0.0687604	0.031028
610.6	0.171569	0.0687215	0.0306293
610.8	0.171514	0.0688431	0.030406
611	0.17181	0.0687446	0.0306754
611.2	0.172293	0.0696049	0.0311592
611.4	0.171769	0.0689305	0.0305252
611.6	0.171527	0.0686068	0.0304581
611.8	0.171941	0.0685164	0.0308545
612	0.172095	0.0686061	0.0314111
612.2	0.171849	0.068424	0.0315627
612.4	0.172271	0.0690647	0.03185
612.6	0.17293	0.0693212	0.0323557
612.8	0.172887	0.0691188	0.0323877
613	0.172923	0.0691261	0.0323654
613.2	0.172936	0.0690523	0.032068
613.4	0.172909	0.0689191	0.0324131
613.6	0.172761	0.0686719	0.0326591
613.8	0.172441	0.068448	0.032907
614	0.171742	0.0682444	0.0328505
614.2	0.171011	0.0677401	0.0321918
614.4	0.170926	0.0676106	0.0321729
614.6	0.170891	0.0671189	0.0317064
614.8	0.170904	0.0670354	0.031565
615	0.171024	0.066911	0.0316356
615.2	0.17138	0.0675488	0.0316828
615.4	0.171647	0.0677985	0.0316755
615.6	0.172286	0.0686492	0.0320672
615.8	0.17275	0.0689744	0.0323218
616	0.172923	0.0696194	0.0323469
616.2	0.173524	0.0702108	0.0328013
616.4	0.17454	0.0707651	0.0330914
616.6	0.174919	0.0711909	0.0339393
616.8	0.175095	0.0712842	0.033626
617	0.174988	0.0715479	0.0337282
617.2	0.175234	0.0716948	0.0343106
617.4	0.174882	0.0715093	0.0345197
617.6	0.174403	0.0717917	0.0347879
617.8	0.174253	0.0718787	0.0347277
618	0.173482	0.0713682	0.0340069
618.2	0.173837	0.0710762	0.0333986
618.4	0.173958	0.0707285	0.0330607
618.6	0.173634	0.0703503	0.0326804
618.8	0.173234	0.0701754	0.0321047
619	0.172982	0.0700916	0.0316495
619.2	0.1733	0.0704301	0.0318449
619.4	0.172863	0.0696857	0.0314056
619.6	0.172398	0.0694241	0.030832
619.8	0.172544	0.0692706	0.0308059
620	0.172521	0.0696102	0.0305761
620.2	0.173014	0.0698707	0.0311706
620.4	0.173605	0.0703162	0.0316196
620.6	0.173882	0.0705118	0.0322797
620.8	0.174155	0.0703685	0.0323173
621	0.174904	0.0710003	0.0334372
621.2	0.175173	0.0710542	0.0338528
621.4	0.174787	0.0706171	0.0336119
621.6	0.174845	0.0711895	0.0339988
621.8	0.175127	0.0712028	0.0339353
622	0.174879	0.0707846	0.0334688
622.2	0.175265	0.0706872	0.0332826
622.4	0.175025	0.0704363	0.0333504
622.6	0.174805	0.0705099	0.0336608
622.8	0.174412	0.0700912	0.0326698
623	0.174145	0.0697231	0.0325148
623.2	0.173864	0.0692211	0.0318539
623.4	0.173207	0.0686647	0.0315232
623.6	0.1734	0.0693903	0.0313441
623.8	0.173746	0.0694919	0.0313213
624	0.173956	0.0701496	0.032031
624.2	0.174269	0.0708949	0.0328396
624.4	0.174946	0.0713716	0.0340095
624.6	0.17552	0.0711839	0.0342862
624.8	0.175516	0.0714806	0.0345501
625	0.176214	0.0719123	0.0348069
625.2	0.176146	0.0713908	0.0342156
625.4	0.175812	0.0710846	0.0340913
625.6	0.175915	0.0715617	0.0343895
625.8	0.176141	0.0709849	0.0339158
626	0.176727	0.0710766	0.0336689
626.2	0.177018	0.0710644	0.0336513
626.4	0.176873	0.0707226	0.0338056
626.6	0.176755	0.0704287	0.0334017
626.8	0.176511	0.0700198	0.0325826
627	0.175864	0.0693453	0.0320552
627.2	0.17552	0.0689674	0.0317283
627.4	0.175989	0.0690749	0.0321327
627.6	0.176159	0.0692569	0.0317097
627.8	0.176508	0.0691229	0.0321246
628	0.177001	0.0695852	0.0329989
628.2	0.176869	0.0696147	0.0325144
628.4	0.176915	0.0700016	0.0324194
628.6	0.176556	0.0700078	0.0319643
628.8	0.176501	0.0702192	0.0320278
629	0.17658	0.0698764	0.0319171
629.2	0.175886	0.0693504	0.0312999
629.4	0.17569	0.069908	0.0318557
629.6	0.176007	0.0702737	0.0322916
629.8	0.176407	0.0705711	0.0324394
630	0.176636	0.0715862	0.0329671
630.2	0.176997	0.0718624	0.0340338
630.4	0.176975	0.0718554	0.0342437
630.6	0.176996	0.0718542	0.0339528
630.8	0.176842	0.0715918	0.0337941
631	0.176697	0.0713199	0.0334575
631.2	0.176852	0.0714474	0.0336543
631.4	0.177145	0.0715964	0.0336024
631.6	0.177054	0.0715092	0.0331279
631.8	0.177506	0.071647	0.0336881
632	0.177234	0.071545	0.033772
632.2	0.176602	0.07147	0.0334148
632.4	0.176437	0.0712975	0.0334503
632.6	0.176142	0.0706626	0.0334424
632.8	0.176062	0.0700275	0.0332674
633	0.175787	0.0696247	0.0330785
633.2	0.175853	0.0698143	0.0328903
633.4	0.17644	0.0704823	0.0335588
633.6	0.176637	0.0708196	0.0336895
633.8	0.17708	0.0716874	0.0340186
634	0.177492	0.0724508	0.0344062
634.2	0.178272	0.0730173	0.0348958
634.4	0.178449	0.0734448	0.0345602
634.6	0.178808	0.074013	0.0344681
[truncated: 2,001 more rows]

## Sheet: CH11-PCH15
Time1	1E-05	2.5E-06	6.25E-07
235	-0.00220795	0.00352158	-0.00105151
235.2	-0.00215959	0.00315522	-0.00050897
235.4	-0.0019758	0.00292386	0.00016639
235.6	-0.0019206	0.00286017	0.00085262
235.8	-0.00147184	0.002913	0.0014798
236	-0.00126588	0.00270913	0.00180781
236.2	-0.00139536	0.00225142	0.00189497
236.4	-0.001663	0.0018876	0.0019033
236.6	-0.00183328	0.00137534	0.00150353
236.8	-0.00149786	0.00129403	0.00142851
237	-0.00156705	0.00080987	0.00086111
237.2	-0.00168053	0.00068632	0.00050224
237.4	-0.00227333	0.00028952	-0.00011418
237.6	-0.00224708	0.00061934	-0.00047264
237.8	-0.00247021	0.00080873	-0.00070625
238	-0.00277067	0.00031662	-0.00135217
238.2	-0.0023984	0.00040221	-0.00149225
238.4	-0.00231831	0.0005329	-0.00093977
238.6	-0.00191982	0.00086639	-0.00052849
238.8	-0.00209391	0.00092595	-0.00055855
239	-0.0014516	0.00105036	1.42e-06
239.2	-0.0017028	0.00121656	0.00015971
239.4	-0.00143987	0.00151412	0.00058763
239.6	-0.00143684	0.00168943	0.00034707
239.8	-0.00075986	0.00209005	0.00050208
240	-0.00097858	0.00152187	-0.00014054
240.2	-0.00140811	0.00125926	-4.598e-05
240.4	-0.00134399	0.00161139	0.00011638
240.6	-0.00161578	0.00136505	-0.00027869
240.8	-0.00154808	0.00174817	1.927e-05
241	-0.00177927	0.00146843	-4.824e-05
241.2	-0.00211658	0.00190747	8.845e-05
241.4	-0.00222623	0.00199085	-0.00031134
241.6	-0.00144311	0.00275687	1.528e-05
241.8	-0.00092739	0.00299203	0.00055793
242	-0.00076052	0.00304244	0.00092532
242.2	-0.00054864	0.00311459	0.00106855
242.4	-0.00076113	0.00302806	0.00146318
242.6	-0.00027338	0.00320688	0.0014276
242.8	-0.00059129	0.00288728	0.00160643
243	-0.00095524	0.00237924	0.00182679
243.2	-0.00125126	0.00261149	0.00203903
243.4	-0.00129045	0.00200627	0.00178687
243.6	-0.00141954	0.00178865	0.00132816
243.8	-0.00108176	0.00177198	0.00135524
244	-0.00129807	0.00104488	0.00129183
244.2	-0.00107837	0.00194638	0.00202017
244.4	-0.00060824	0.00220032	0.00195444
244.6	-0.00102176	0.00178993	0.0016874
244.8	-0.00114242	0.00212328	0.00157972
245	-0.00141038	0.0021155	0.00113679
245.2	-0.00146233	0.0022562	0.00055441
245.4	-0.00160193	0.00244191	0.00061326
245.6	-0.00149036	0.00316022	0.00084034
245.8	-0.00201246	0.00348044	0.00097907
246	-0.00216595	0.00345164	0.0007102
246.2	-0.00225536	0.00273889	-8.2e-05
246.4	-0.00205498	0.00288986	0.00028816
246.6	-0.00210396	0.0029374	-0.00036152
246.8	-0.00225142	0.00298687	7.587e-05
247	-0.0028337	0.00265599	-8.463e-05
247.2	-0.00241357	0.002674	0.00033604
247.4	-0.00257595	0.00212881	0.00014416
247.6	-0.00180925	0.00241171	0.001044
247.8	-0.0014263	0.00213633	0.00128923
248	-0.00109126	0.00220467	0.00194383
248.2	-0.00062519	0.00255344	0.0021467
248.4	-0.00052695	0.00147109	0.00218212
248.6	-0.00098672	0.00088137	0.00192526
248.8	-0.00153466	0.00067959	0.00132409
249	-0.00167124	0.00036131	0.00095402
249.2	-0.0014654	0.00046576	0.00113756
249.4	-0.00161232	0.00076029	0.00157148
249.6	-0.00149486	0.00108191	0.00109353
249.8	-0.00125357	0.00129536	0.00082271
250	-0.00095504	0.00123891	0.00059007
250.2	-0.00090988	0.00099092	0.00014963
250.4	-0.00101601	0.00174876	0.00017959
250.6	-0.00075824	0.00222544	0.00023482
250.8	-0.0010276	0.00233399	0.00045889
251	-0.00092532	0.00251524	0.00015597
251.2	-0.00089974	0.002817	0.00058769
251.4	-0.00116996	0.00301771	0.00067284
251.6	-0.00063945	0.00326998	0.00090841
251.8	-0.00087519	0.00313807	0.00034685
252	-0.00076912	0.00354831	0.00011337
252.2	-0.00065823	0.00329758	-0.00016016
252.4	-0.0006688	0.00312439	-0.00048534
252.6	-0.00059805	0.00337567	-0.00084299
252.8	-0.00083861	0.00304485	-0.0015054
253	-0.0005304	0.00330578	-0.00140486
253.2	-0.00052044	0.00308075	-0.00131858
253.4	-0.00024013	0.00260865	-0.00158406
253.6	-0.00057581	0.00209191	-0.00243692
253.8	-0.00032234	0.00221632	-0.00225641
254	-0.00076907	0.00201739	-0.00217987
254.2	-0.00079108	0.00173849	-0.00264947
254.4	-0.00086726	0.001907	-0.00255009
254.6	-0.0008127	0.00160891	-0.00199372
254.8	-0.0015297	0.00122147	-0.00231794
255	-0.00138978	0.00141137	-0.00204504
255.2	-0.00177317	0.00125649	-0.00162247
255.4	-0.0021111	0.00105481	-0.0019229
255.6	-0.00148211	0.00122128	-0.00132816
255.8	-0.00115824	0.00151623	-0.00076772
256	-0.00111389	0.00140384	-0.00062873
256.2	-0.0008077	0.00131595	-0.00030337
256.4	-0.00116335	0.0010411	-0.00022956
256.6	-0.00103487	0.00083537	0.00040209
256.8	-0.00108433	0.0005458	0.00054892
257	-0.00076766	0.00074722	0.00108782
257.2	-0.00094534	0.00025975	0.00108591
257.4	-0.00055335	0.00012371	0.0011289
257.6	-0.00079022	0.00013985	0.00078556
257.8	-0.00088455	0.00023039	0.00086904
258	-0.00108922	0.00042991	0.0006992
258.2	-0.00090687	0.00087116	0.00070245
258.4	-0.00096451	0.00096238	0.00107048
258.6	-0.00123005	0.00044823	0.00131297
258.8	-0.00164523	0.00091955	0.00110751
259	-0.00180343	0.00096082	0.00095125
259.2	-0.00193208	0.00057964	0.00069876
259.4	-0.00174954	0.00092178	0.00076905
259.6	-0.00133011	0.00137152	0.00112467
259.8	-0.00142619	0.00126497	0.00084716
260	-0.00169075	0.00071488	0.00014161
260.2	-0.00147489	0.00076145	-0.00021282
260.4	-0.00182733	0.00065469	-0.00038217
260.6	-0.0014315	0.00056473	-0.0004019
260.8	-0.0013929	0.00078716	-0.00100022
261	-0.00153299	0.00055166	-0.00167365
261.2	-0.00122753	0.00044341	-0.00181263
261.4	-0.00073745	0.00032552	-0.00165605
261.6	-0.0009458	-9.789e-05	-0.00203783
261.8	-0.00082168	-0.00043757	-0.00181348
262	-0.00037338	5e-08	-0.00118554
262.2	-0.0002559	1.502e-05	-0.00037834
262.4	-2.77e-06	-0.00020383	5.143e-05
262.6	-0.00014435	-0.00117707	0.00025958
262.8	6.924e-05	-0.00041194	0.00085685
263	0.00065013	-0.00021739	0.00150277
263.2	0.00118465	-5.34e-06	0.00180247
263.4	0.00130536	0.00054553	0.00254659
263.6	0.00099227	0.00080929	0.00283194
263.8	0.00097221	0.00080655	0.00272644
264	0.00144152	0.00111971	0.00295712
264.2	0.00155014	0.00193727	0.00284669
264.4	0.00160977	0.00242377	0.00290628
264.6	0.00136682	0.00299174	0.00259212
264.8	0.0007887	0.00320545	0.00210268
265	0.00052089	0.00330869	0.00199479
265.2	0.00033902	0.00335423	0.00204205
265.4	0.00012391	0.00332909	0.00205358
265.6	-0.00011614	0.00284167	0.00141868
265.8	-2.744e-05	0.00268118	0.00134394
266	-0.00029035	0.00263983	0.00113261
266.2	-0.00028064	0.00266118	0.00127627
266.4	-9.686e-05	0.00246577	0.00129839
266.6	-0.00033837	0.00218534	0.00158407
266.8	2.667e-05	0.00265724	0.00214333
267	0.00030887	0.00215736	0.0018138
267.2	0.00026465	0.00153799	0.0015713
267.4	-0.00026463	0.00091095	0.00143061
267.6	-7.075e-05	0.00077425	0.00118419
267.8	3.6e-05	0.00100847	0.00072161
268	0.00014064	0.00116432	0.00101625
268.2	-0.00023361	0.00132934	0.00064858
268.4	-8.559e-05	0.00132312	0.00088471
268.6	-0.00061826	0.00150486	0.00066346
268.8	-0.00061053	0.00148325	0.0009811
269	-0.00028105	0.00186654	0.00156115
269.2	-0.00020783	0.0018432	0.00147049
269.4	0.00035971	0.00205427	0.00185077
269.6	0.00024967	0.00200151	0.00165414
269.8	0.00035968	0.00188038	0.00196123
270	7.421e-05	0.00219683	0.00219102
270.2	0.00024631	0.00243295	0.00236359
270.4	4.058e-05	0.00244913	0.00271962
270.6	0.00040404	0.00266459	0.00298256
270.8	0.00090079	0.00266745	0.00300917
271	0.00082237	0.0022513	0.00244848
271.2	0.00065601	0.00201978	0.0024259
271.4	0.00096	0.00204385	0.00223413
271.6	0.00120984	0.00230159	0.0019702
271.8	0.00065643	0.00252555	0.00185889
272	0.00076642	0.00273201	0.00187245
272.2	0.00050009	0.00257996	0.00144489
272.4	0.00064586	0.00261758	0.00163195
272.6	-5.108e-05	0.00248362	0.00127294
272.8	0.00036026	0.00265746	0.00181045
273	0.00024955	0.00267074	0.00183446
273.2	0.00015842	0.00271377	0.00121032
273.4	2.963e-05	0.00264405	0.00156053
273.6	-0.00045392	0.00260295	0.00132017
273.8	-0.00086835	0.0022765	0.00150956
274	-0.00125547	0.00216034	0.00094389
274.2	-0.00112324	0.00180856	0.00088191
274.4	-0.00108283	0.00220514	0.0013635
274.6	-0.00041958	0.00243028	0.00141427
274.8	8.16e-06	0.00308096	0.00168413
275	-0.00068053	0.00244496	0.00135296
275.2	7.675e-05	0.00264037	0.00188809
275.4	0.00013464	0.00269066	0.00130888
275.6	-0.00011522	0.00251823	0.00124579
275.8	-0.00015852	0.00275458	0.00126107
276	-5.455e-05	0.00286879	0.00093298
276.2	-0.00054756	0.00241464	0.00074032
276.4	-0.00037114	0.00284072	0.00087221
276.6	-0.00099119	0.00279658	0.00061747
276.8	-0.00067872	0.0030004	0.00046012
277	-0.00062473	0.00321434	0.00080916
277.2	-0.00042827	0.00312246	0.00068508
277.4	-0.00060271	0.00295907	0.00127484
277.6	-0.00061416	0.00277614	0.00106
277.8	-0.00057811	0.002552	0.00125956
278	-0.00053604	0.00242976	0.00108967
278.2	-0.00046777	0.00240313	0.00150147
278.4	-0.00012383	0.00286382	0.00155328
278.6	6.684e-05	0.0026445	0.00142615
278.8	9.74e-06	0.00312276	0.0017761
279	-0.00023867	0.002739	0.00192034
279.2	0.00057911	0.00332419	0.00202975
279.4	0.00035318	0.00309236	0.00164593
279.6	0.00017209	0.00267108	0.00176181
279.8	0.00047224	0.00271808	0.00168808
280	0.00043233	0.00249316	0.00155762
280.2	0.00016432	0.00253721	0.00137667
280.4	2.119e-05	0.00281153	0.00127462
280.6	-0.00011271	0.00271718	0.0011328
280.8	-0.00037658	0.00218458	0.00063562
281	-0.00046126	0.00173266	0.00106965
281.2	-0.00081884	0.00112886	0.00077228
281.4	-0.0012244	0.00071003	0.00031072
281.6	-0.00118661	0.00078564	0.00013861
281.8	-0.00162792	0.00083261	0.00045676
282	-0.00165419	0.00104209	0.00073613
282.2	-0.00133512	0.00078547	0.00072496
282.4	-0.00117024	0.00078606	0.00072664
282.6	-0.00119874	0.00089643	0.00115013
282.8	-0.00107292	0.00164813	0.00164896
283	-0.0005811	0.00198865	0.00195026
283.2	6.08e-06	0.0024675	0.00172377
283.4	-0.00034887	0.00188878	0.00171639
283.6	-0.00054434	0.00171785	0.00145899
283.8	-0.00023316	0.00188377	0.00165289
284	-0.00021028	0.00178725	0.00164263
284.2	-7.953e-05	0.00204793	0.00174029
284.4	5.961e-05	0.001873	0.00159439
284.6	0.00023409	0.00153364	0.00145054
284.8	-0.00055486	0.00026615	0.0007175
285	-0.00078753	-8.46e-05	0.00095589
285.2	-0.0014247	-0.00058105	0.00067751
285.4	-0.00149645	-0.00064837	0.00055488
285.6	-0.00142707	-5.968e-05	0.00123329
285.8	-0.00150171	-0.00022032	0.00178605
286	-0.00136524	-1.36e-06	0.00157078
286.2	-0.00160938	-5.595e-05	0.00110006
286.4	-0.00217249	0.00039397	0.00087693
286.6	-0.00172801	0.00102435	0.00086786
286.8	-0.00198119	0.00157098	0.00042061
287	-0.00191328	0.00188349	7.953e-05
287.2	-0.00191628	0.00199748	-0.00046669
287.4	-0.00190361	0.00218754	-0.00028269
287.6	-0.00119584	0.00271369	2.358e-05
287.8	-0.00092046	0.00262726	0.00014106
288	-0.00010735	0.0027658	0.0008447
288.2	0.00057057	0.00270289	0.0014941
288.4	0.00048001	0.00205465	0.00138178
288.6	0.00097948	0.00201924	0.00193317
288.8	0.00030695	0.00117199	0.00170519
289	0.00028847	0.00128887	0.00240825
289.2	0.00017645	0.00075804	0.00204234
289.4	0.00034199	0.0008861	0.00221789
289.6	0.00026881	0.00109636	0.00266593
289.8	-2.393e-05	0.00058732	0.00209286
290	-1.645e-05	0.00100208	0.001343
290.2	1.511e-05	0.00143118	0.00154656
290.4	-8.356e-05	0.00167831	0.00115065
290.6	0.00016274	0.00203789	0.00108326
290.8	-0.00017583	0.002274	0.00114802
291	0.00013696	0.00217924	0.00089579
291.2	0.00056704	0.00243885	0.00099305
291.4	0.00104413	0.00249859	0.00171858
291.6	0.00113137	0.00258426	0.00202524
291.8	0.00133086	0.00261235	0.00223962
292	0.00206302	0.00285499	0.00283254
292.2	0.00170544	0.00223787	0.00261457
292.4	0.00195484	0.00241585	0.00216006
292.6	0.00189921	0.00230057	0.00212987
292.8	0.00114997	0.00211841	0.00179933
293	0.00120767	0.00189269	0.00125199
293.2	0.00112566	0.00185596	0.00073659
293.4	0.00128936	0.00243	0.00102219
293.6	0.00099582	0.00265206	0.00101911
293.8	0.00063639	0.00291387	0.00057907
294	0.00085152	0.00322151	0.00072005
294.2	0.00090294	0.00318391	0.00118226
294.4	0.0003631	0.00334591	0.00094879
294.6	0.00075943	0.00352221	0.00173412
294.8	0.00083783	0.00394295	0.00218969
295	0.00124719	0.00354659	0.00199565
295.2	0.00101618	0.00408796	0.00225524
295.4	0.00094118	0.00410647	0.00270844
295.6	0.00118201	0.00466669	0.00289874
295.8	0.00130803	0.00481997	0.00320716
296	0.00163387	0.004882	0.00362062
296.2	0.00152759	0.00471408	0.00370744
296.4	0.00124912	0.00439363	0.00359108
296.6	0.00024514	0.00345469	0.00301542
296.8	0.00023308	0.00330081	0.0028233
297	0.00012797	0.00248604	0.00227489
297.2	-0.00043494	0.00248285	0.00221294
297.4	-0.00066873	0.00205757	0.00203547
297.6	-0.00136318	0.00181179	0.00172698
297.8	-0.00128168	0.00139735	0.00187512
298	-0.00117965	0.00134831	0.00206497
298.2	-0.00116158	0.00144206	0.00249501
298.4	-0.00112045	0.00148897	0.00278388
298.6	-0.00023316	0.0011952	0.00325485
298.8	-0.00059606	0.00142717	0.00313613
299	-0.00011805	0.00168378	0.00345203
299.2	-0.00039546	0.00227669	0.00320753
299.4	-4.705e-05	0.0023891	0.0033931
299.6	-1.045e-05	0.0028513	0.00359689
299.8	0.00010051	0.00345033	0.00395514
300	0.00019785	0.00418044	0.00381567
300.2	-0.00036004	0.00396771	0.00304327
300.4	-0.00066006	0.00359409	0.00242751
300.6	-0.00075566	0.00339282	0.00147217
300.8	-0.0003945	0.00354474	0.00145042
301	-0.00095307	0.0031207	0.00082055
301.2	-0.00144335	0.00304245	0.00052087
301.4	-0.00121733	0.00328384	0.00061327
301.6	-0.00085016	0.00361658	0.00073847
301.8	-0.00022662	0.00386883	0.00131564
302	-7.852e-05	0.00423014	0.00149158
302.2	-1.122e-05	0.00341823	0.00134616
302.4	0.00052224	0.0028736	0.00143255
302.6	0.00072472	0.00220764	0.00175262
302.8	0.00044839	0.00219455	0.00198272
303	0.00071223	0.00229564	0.00236308
303.2	0.00050542	0.00211115	0.00244155
303.4	0.0008449	0.00209782	0.00275355
303.6	0.00095977	0.00228833	0.0033052
303.8	0.00106027	0.00253046	0.00322356
304	0.00094801	0.00277147	0.00295823
304.2	0.00149019	0.00247794	0.00322544
304.4	0.00208284	0.00262326	0.00309337
304.6	0.00198865	0.00276326	0.00279309
304.8	0.00237787	0.00334868	0.00302142
305	0.00216163	0.00344883	0.00306224
305.2	0.00192923	0.00376376	0.00314349
305.4	0.00184088	0.00432848	0.00331777
305.6	0.00187933	0.00462415	0.00341377
305.8	0.00176527	0.00502995	0.00366668
306	0.00123991	0.00464695	0.00296261
306.2	0.00095377	0.00377804	0.00233665
306.4	0.00138417	0.0039553	0.00233157
306.6	0.00105155	0.00366354	0.00238564
306.8	0.00066107	0.00328996	0.00189945
307	0.00076482	0.00377407	0.00175439
307.2	0.00098366	0.00387093	0.00224792
307.4	0.00118987	0.00389062	0.00199503
307.6	0.00118386	0.00405189	0.00255121
307.8	0.00078151	0.00404746	0.00214593
308	0.00065621	0.00453024	0.00193332
308.2	0.00057032	0.00408319	0.00185376
308.4	0.0004157	0.00402141	0.00162924
308.6	0.00049516	0.00421517	0.00171048
308.8	0.00050743	0.00432798	0.00191376
309	-0.00016509	0.00398878	0.00213877
309.2	0.00012345	0.00462526	0.00258695
309.4	0.00022861	0.00517057	0.00309457
309.6	0.00032867	0.00538031	0.0031953
309.8	0.000456	0.00524653	0.00303443
310	0.00036943	0.00464814	0.0026605
310.2	0.00050654	0.00441053	0.00184819
310.4	0.00116749	0.0049023	0.00221189
310.6	0.00111802	0.00460004	0.00205144
310.8	0.00121052	0.00422407	0.00172292
311	0.00174449	0.00486363	0.00198247
311.2	0.00196639	0.00448506	0.00235088
311.4	0.00174933	0.00464606	0.00214828
311.6	0.00122514	0.00461338	0.00236791
311.8	0.00068436	0.00412386	0.00175923
312	0.000107	0.00396808	0.00148404
312.2	9.162e-05	0.00377542	0.00179719
312.4	0.00036356	0.00386659	0.00205827
312.6	0.00025705	0.00394008	0.00142899
312.8	0.00017746	0.00397782	0.00204679
313	0.0001509	0.00398194	0.00257455
313.2	0.00013983	0.00433937	0.00279759
313.4	-3.659e-05	0.00411658	0.00287636
313.6	0.00016669	0.00400711	0.00290675
313.8	0.00024796	0.00374882	0.00304084
314	-4.053e-05	0.00350764	0.00260952
314.2	0.00030213	0.0036245	0.00229074
314.4	0.00056761	0.0032851	0.00247609
314.6	0.00054011	0.00318257	0.00213553
314.8	0.00065588	0.00337339	0.00212716
315	0.00126657	0.0038096	0.00212316
315.2	0.00082162	0.00381349	0.001966
315.4	0.00104412	0.0041604	0.00185763
315.6	0.00085087	0.00420744	0.00216785
315.8	0.00095438	0.00370771	0.00185236
316	0.00124097	0.00426329	0.00212155
316.2	0.00200114	0.00492893	0.00263517
316.4	0.00234591	0.00492436	0.00246741
316.6	0.00194443	0.0046109	0.00218731
316.8	0.00147658	0.00408419	0.00250624
317	0.00126109	0.00423945	0.00261497
317.2	0.0005573	0.00351821	0.00223127
317.4	0.00095775	0.00322052	0.00258147
317.6	0.0012668	0.0034483	0.00268874
317.8	0.00109428	0.00299154	0.0023768
318	0.00086319	0.00289475	0.0018127
318.2	0.0009417	0.00281081	0.00150545
318.4	0.00032691	0.0024166	0.00106064
318.6	0.0001799	0.00306067	0.00102235
318.8	-0.00037141	0.00277043	0.00074424
319	-0.00064447	0.00283506	0.00099182
319.2	-0.00111188	0.00273884	0.00101152
319.4	-0.00058681	0.00271128	0.00133014
319.6	0.00020046	0.00288567	0.00213602
319.8	0.00085329	0.00306541	0.00218545
320	0.00173371	0.00395395	0.00257687
320.2	0.00204716	0.00409223	0.00275702
320.4	0.00260541	0.00419966	0.0029518
320.6	0.00222363	0.00375398	0.00302304
320.8	0.00218394	0.0035789	0.00313621
321	0.00226818	0.00399551	0.00305817
321.2	0.00199172	0.00326583	0.00321815
321.4	0.00199393	0.00323116	0.00336348
321.6	0.00275823	0.00400606	0.00365047
321.8	0.00261348	0.00353026	0.00301359
322	0.00234105	0.00322214	0.00219881
322.2	0.00172173	0.00334703	0.00194431
322.4	0.00073011	0.00262534	0.00185368
322.6	1.716e-05	0.00257833	0.00132139
322.8	-0.00036879	0.00227498	0.00112111
323	-0.00011025	0.0025306	0.00159973
323.2	0.0002691	0.00291487	0.00156262
323.4	0.00089679	0.00277531	0.00175028
323.6	0.0015463	0.00239813	0.00175706
323.8	0.00134409	0.0027527	0.00143822
324	0.00151605	0.00279914	0.00142252
324.2	0.00105935	0.00263284	0.00130128
324.4	0.00189635	0.00274925	0.00184863
324.6	0.00157097	0.00251932	0.00154718
324.8	0.00158218	0.00268851	0.00162069
325	0.00148665	0.00295225	0.00164976
325.2	0.00158364	0.00276938	0.0023087
325.4	0.00151309	0.00263274	0.00196055
325.6	0.00189091	0.00361031	0.00206967
325.8	0.00135657	0.00322487	0.00192176
326	0.0010541	0.00341238	0.00188251
326.2	0.00066493	0.00382037	0.00240019
326.4	0.0005324	0.00373102	0.00250152
326.6	0.00042275	0.00414777	0.00223375
326.8	0.00094559	0.0047462	0.00252593
327	0.00111574	0.00477677	0.00274632
327.2	0.00151305	0.00493308	0.00259816
327.4	0.00192836	0.00435197	0.00258571
327.6	0.00164126	0.00377453	0.00214236
327.8	0.00176306	0.00468515	0.00250984
328	0.00141326	0.00449934	0.00243011
328.2	0.00102828	0.00407863	0.00200612
328.4	0.00175436	0.0043043	0.00243493
328.6	0.00171845	0.00469367	0.00249732
328.8	0.00160222	0.00474788	0.0029362
329	0.00179	0.00484755	0.0030972
329.2	0.00140468	0.00473056	0.00307043
329.4	0.00100928	0.00442902	0.00269924
329.6	0.00087481	0.00473494	0.00294815
329.8	0.00073047	0.00377816	0.00302592
330	0.00064773	0.00319362	0.00280118
330.2	0.00044915	0.00298787	0.00265066
330.4	0.00070942	0.00285372	0.00250177
330.6	0.00076542	0.00225369	0.00217122
330.8	0.00134677	0.00272247	0.00208711
331	0.00149725	0.00223269	0.00213777
331.2	0.00165459	0.00209817	0.00182442
331.4	0.00199282	0.00217209	0.00224471
331.6	0.00183016	0.00230977	0.00208006
331.8	0.00183399	0.00279653	0.00211656
332	0.00178856	0.00290656	0.0019862
332.2	0.00204126	0.00339615	0.0017476
332.4	0.0021871	0.00402664	0.00248968
332.6	0.00233926	0.004171	0.00283413
332.8	0.00221631	0.00409713	0.00282055
333	0.00267423	0.00451927	0.00290139
333.2	0.00225167	0.00450819	0.00243218
333.4	0.0021457	0.00435902	0.00225034
333.6	0.00190374	0.00431751	0.00243904
333.8	0.00194896	0.00385085	0.0023854
334	0.00177103	0.00342319	0.0021987
334.2	0.00173322	0.00358371	0.00246145
334.4	0.00180566	0.00335715	0.00233804
334.6	0.00148187	0.00291074	0.00208407
334.8	0.00161976	0.003331	0.00255556
335	0.00142599	0.00313416	0.00256247
335.2	0.00080333	0.00283917	0.00185636
335.4	0.00074938	0.00302488	0.00183766
335.6	0.00029323	0.00278224	0.00104782
335.8	0.00012388	0.00265494	0.00049425
336	2.338e-05	0.00283018	0.00070149
336.2	-0.00070043	0.0029639	0.00024537
336.4	-0.00103568	0.00260674	0.00035616
336.6	-0.00089595	0.00238165	9.555e-05
336.8	-0.00082513	0.00273725	-0.00021687
337	-0.00064589	0.00310687	-0.00032816
337.2	-0.00089816	0.00321358	-0.00048943
337.4	-0.00059552	0.00346185	-1.79e-05
337.6	-0.00023477	0.00386938	0.00042926
337.8	0.00038959	0.00449138	0.00055646
338	0.00088672	0.00469904	0.00103252
338.2	0.00128039	0.00523498	0.00171815
338.4	0.00199376	0.00582289	0.00218684
338.6	0.00247741	0.00589033	0.00260533
338.8	0.00307993	0.00611822	0.00347272
339	0.00357346	0.00632363	0.00334805
339.2	0.00349918	0.00586115	0.00299832
339.4	0.00318315	0.0055863	0.00257488
339.6	0.00302674	0.00508692	0.00239175
339.8	0.00300895	0.00448234	0.00236786
340	0.00258816	0.00401276	0.00234293
340.2	0.00209724	0.00356512	0.00196293
340.4	0.00200084	0.0030366	0.00159425
340.6	0.00164505	0.00250877	0.00121111
340.8	0.00127914	0.00257511	0.00131207
341	0.00154212	0.0025151	0.00162438
341.2	0.00148769	0.00234712	0.00158768
341.4	0.00142726	0.00220185	0.00195225
341.6	0.00150985	0.00224504	0.00220963
341.8	0.00150046	0.0020059	0.00195507
342	0.00185903	0.00195059	0.00237332
342.2	0.00192904	0.00197643	0.00260947
342.4	0.00245952	0.00212371	0.00280641
342.6	0.00258373	0.00206529	0.00328488
342.8	0.00296697	0.002506	0.00392676
343	0.00343008	0.00276598	0.00384487
343.2	0.00333566	0.00340635	0.00333837
343.4	0.00275593	0.00343244	0.00246231
343.6	0.00281213	0.0038083	0.00266868
343.8	0.00323304	0.00435274	0.00248243
344	0.00279109	0.0047085	0.00242446
344.2	0.00269231	0.00523853	0.0021355
344.4	0.00222442	0.00525344	0.00146111
344.6	0.00196701	0.00576547	0.0010535
344.8	0.0016779	0.00614226	0.00138405
345	0.00216105	0.00621922	0.00144384
345.2	0.00136149	0.00589607	0.0011594
345.4	0.00123844	0.00569517	0.00150153
345.6	0.00143919	0.00577914	0.00171316
345.8	0.00162117	0.00565894	0.0014877
346	0.00157188	0.00537619	0.00197805
346.2	0.00169735	0.00526696	0.00210141
346.4	0.00163777	0.00523128	0.00261084
346.6	0.00186696	0.00552729	0.00377685
346.8	0.00158371	0.00536715	0.00360335
347	0.00197552	0.00541954	0.0031761
347.2	0.00192982	0.0057762	0.00297154
347.4	0.00211375	0.00571585	0.00274354
347.6	0.00243843	0.00556856	0.00275076
347.8	0.00234727	0.0054584	0.00201027
348	0.00188885	0.00468337	0.00193997
348.2	0.0022887	0.00440842	0.00140429
348.4	0.00161679	0.00376437	0.00062885
348.6	0.00167266	0.0038598	0.00067177
348.8	0.0018462	0.00381635	0.00116409
349	0.00234004	0.00376693	0.00157495
349.2	0.00186019	0.00347362	0.00146455
349.4	0.00199242	0.00350074	0.00176733
349.6	0.00241966	0.00443042	0.00253855
349.8	0.00244029	0.00403617	0.0024189
350	0.00260851	0.00447218	0.00325898
350.2	0.00283383	0.00509401	0.00358067
350.4	0.00263497	0.0052161	0.00380021
350.6	0.00271249	0.00536332	0.00390102
350.8	0.00209408	0.00469001	0.00299884
351	0.0027455	0.00533035	0.00315474
351.2	0.00294874	0.00529959	0.0034356
351.4	0.003217	0.00532818	0.00307508
351.6	0.00284194	0.00465536	0.00255791
351.8	0.00263287	0.00462262	0.00221656
352	0.00269544	0.00456393	0.0025903
352.2	0.00315053	0.00484169	0.00233255
352.4	0.00268585	0.00490792	0.0018792
352.6	0.00271915	0.00469767	0.00208165
352.8	0.00275942	0.00505184	0.00200384
353	0.00238939	0.00454902	0.001979
353.2	0.00264837	0.00505997	0.00205535
353.4	0.00274585	0.00499432	0.00231139
353.6	0.00310993	0.00575672	0.00270216
353.8	0.00292351	0.00520437	0.00266563
354	0.00363652	0.00612081	0.00299931
354.2	0.00310931	0.00579728	0.00248197
354.4	0.00291838	0.00547218	0.00201109
354.6	0.00258118	0.0044281	0.00182269
354.8	0.00196542	0.00360039	0.00151451
355	0.00224838	0.00404528	0.00197266
355.2	0.00210184	0.00355189	0.00222345
355.4	0.00160182	0.00326065	0.00150193
355.6	0.00123466	0.0030452	0.00160406
355.8	0.00125245	0.00329521	0.00166014
356	0.00102972	0.00339578	0.00154899
356.2	0.00074527	0.00360405	0.00155641
356.4	0.00010245	0.00375223	0.0017072
356.6	0.00011859	0.00397586	0.00184418
356.8	0.00079378	0.00482253	0.00215255
357	0.00081522	0.00481868	0.00215441
357.2	0.00136087	0.00553216	0.00265866
357.4	0.0010965	0.00489087	0.00224509
357.6	0.00135296	0.00502919	0.00196154
357.8	0.00156213	0.00479991	0.00161126
358	0.00207794	0.00506892	0.00141102
358.2	0.00148127	0.0043373	0.00098784
358.4	0.0015161	0.00385882	0.00080806
358.6	0.0014384	0.002685	0.00056878
358.8	0.00116398	0.00246182	0.00029164
359	0.00127513	0.0020154	-7.209e-05
359.2	0.00070565	0.00157299	-0.00046256
359.4	9.764e-05	0.0011821	-0.00134378
359.6	-0.00017197	0.00096635	-0.00147427
359.8	-0.00040153	0.00088468	-0.00175383
360	-0.00089609	0.00083985	-0.00156022
360.2	-0.00164142	0.0008658	-0.00131523
360.4	-0.00165722	0.00176452	-0.00096629
360.6	-0.00124235	0.00197704	-0.0009174
360.8	-0.00101588	0.00242341	-0.00022828
361	-0.0011725	0.00236336	-0.00026522
361.2	-0.00076018	0.00319343	0.00049526
361.4	-0.00048636	0.00325472	0.00025736
361.6	-0.00023218	0.00328723	-6.441e-05
361.8	0.00040485	0.00384188	0.00053396
362	0.00035206	0.00433142	0.00101148
362.2	0.00013594	0.00460719	0.00136218
362.4	0.00066368	0.00506369	0.00157142
362.6	0.0013687	0.00490073	0.00160993
362.8	0.00176414	0.00488861	0.00156087
363	0.00190192	0.00453291	0.00123858
363.2	0.001733	0.00483701	0.00158153
363.4	0.00224576	0.00508007	0.00150515
363.6	0.00223996	0.00497429	0.00133892
363.8	0.00252506	0.00528176	0.0015219
364	0.00213117	0.00514967	0.0013233
364.2	0.00182423	0.0050763	0.00094757
364.4	0.00198859	0.00545816	0.00113602
364.6	0.00240082	0.00522204	0.00134914
364.8	0.00226052	0.00554007	0.00146789
365	0.00264345	0.0055248	0.00137504
365.2	0.00237935	0.00588707	0.00136688
365.4	0.00250851	0.00526068	0.00136604
365.6	0.00235814	0.00520993	0.00149459
365.8	0.00247831	0.00576983	0.00267074
366	0.00178934	0.00577463	0.00281331
366.2	0.00203491	0.00556913	0.00299469
366.4	0.00270278	0.00517884	0.00300497
366.6	0.00335271	0.00486991	0.00316895
366.8	0.00306563	0.00439597	0.00327148
367	0.00301683	0.00414581	0.00336327
367.2	0.00333182	0.00458408	0.00355515
367.4	0.00363675	0.0047025	0.00351706
367.6	0.00299708	0.00410063	0.0029204
367.8	0.00334146	0.00401165	0.00297378
368	0.00327941	0.00348652	0.00240917
368.2	0.00316522	0.00329551	0.00223842
368.4	0.00371305	0.00361649	0.00256965
368.6	0.00325152	0.00310931	0.001956
368.8	0.00304864	0.00307159	0.00219468
369	0.00365341	0.00308255	0.0023422
369.2	0.00327257	0.00312508	0.00228492
369.4	0.00350887	0.00314711	0.00267972
369.6	0.00358184	0.00358576	0.00285478
369.8	0.00362119	0.00399162	0.0029816
370	0.00383248	0.00383228	0.00259146
370.2	0.0042994	0.00372953	0.00267822
370.4	0.00417358	0.00347398	0.00281374
370.6	0.00386715	0.00372724	0.00298462
370.8	0.00363988	0.00386309	0.00312676
371	0.0041043	0.00412289	0.00302281
371.2	0.00420961	0.00485893	0.00306882
371.4	0.00399426	0.00440276	0.00332294
371.6	0.0037928	0.00450359	0.00370295
371.8	0.00419273	0.00445957	0.0041941
372	0.00405263	0.00449363	0.00374593
372.2	0.00343107	0.00438434	0.00344819
372.4	0.00323617	0.00424294	0.00366747
372.6	0.00248567	0.00378198	0.00339539
372.8	0.0022789	0.00412203	0.00373263
373	0.00195681	0.00448791	0.00354604
373.2	0.00129942	0.00434207	0.00326371
373.4	0.00120639	0.0043613	0.0029719
373.6	0.00147751	0.00479753	0.00297715
373.8	0.00093606	0.00474321	0.00257131
374	0.00130369	0.00482473	0.00244792
374.2	0.00078919	0.00467653	0.0022958
374.4	0.00051585	0.00459094	0.00232859
374.6	0.00095686	0.00500984	0.0023104
374.8	0.00188743	0.00552886	0.00231117
375	0.00245993	0.00607256	0.002248
375.2	0.00275436	0.0068935	0.00249841
375.4	0.00334653	0.00693577	0.00279225
375.6	0.00406445	0.00745058	0.00355713
375.8	0.00459967	0.00713079	0.00355799
376	0.0045677	0.00729948	0.00343041
376.2	0.00444928	0.00726641	0.00349572
376.4	0.00474786	0.00712277	0.00405756
376.6	0.00533481	0.00750895	0.00466493
376.8	0.00532999	0.00702111	0.00504915
377	0.00559308	0.0070349	0.00556446
377.2	0.00522462	0.00632183	0.00535628
377.4	0.00464809	0.00589481	0.00519999
377.6	0.004623	0.00578233	0.00528314
377.8	0.00425217	0.00522269	0.00487895
378	0.00391403	0.00488323	0.00445219
378.2	0.00333417	0.00436522	0.00422357
378.4	0.00354979	0.00457296	0.00443171
378.6	0.00352509	0.00458504	0.00458831
378.8	0.00381046	0.00507441	0.00458525
379	0.00370392	0.00545808	0.0044626
379.2	0.00365222	0.00595806	0.00428116
379.4	0.00372399	0.00593685	0.0040915
379.6	0.00366453	0.00597504	0.0041051
379.8	0.00362551	0.00598099	0.00377925
380	0.00295324	0.00590485	0.003466
380.2	0.00275825	0.00578769	0.00278157
380.4	0.00295124	0.00568541	0.0027797
380.6	0.00292753	0.0056	0.00280395
380.8	0.00265728	0.00515141	0.00271165
381	0.00233494	0.00501572	0.00220519
381.2	0.00152809	0.00440748	0.00184287
381.4	0.00116117	0.00403495	0.00154531
381.6	0.00108915	0.00343311	0.00153275
381.8	0.00078548	0.00271132	0.00111154
382	0.00090375	0.00249554	0.00113424
382.2	0.00139094	0.0021864	0.00140984
382.4	0.00139714	0.00227913	0.00160535
382.6	0.00181802	0.00244728	0.00218634
382.8	0.00274434	0.0033677	0.00231171
383	0.00292531	0.00364871	0.00279155
383.2	0.00315064	0.00389335	0.0027604
383.4	0.00330044	0.00410327	0.00284369
383.6	0.00311879	0.00419246	0.00299545
383.8	0.00336304	0.00464068	0.0033076
384	0.0032271	0.00481541	0.00284375
384.2	0.00411347	0.00539524	0.00263445
384.4	0.00430948	0.00552722	0.00274005
384.6	0.00438156	0.00596084	0.00287353
384.8	0.00442165	0.00570696	0.00242128
385	0.00465343	0.00551548	0.00247092
385.2	0.00475485	0.00543814	0.003056
385.4	0.0045284	0.00580407	0.00304167
385.6	0.0041097	0.00530175	0.00289993
385.8	0.00415486	0.00486958	0.00273872
386	0.00459515	0.00502969	0.00309045
386.2	0.00436046	0.00464433	0.00308154
386.4	0.0037432	0.00463238	0.00324737
386.6	0.00386774	0.00524035	0.0040207
386.8	0.00355361	0.00519004	0.00414165
387	0.00268714	0.00470608	0.00405737
387.2	0.00235745	0.00422493	0.00335913
387.4	0.00155912	0.0037902	0.00300851
387.6	0.001383	0.00368113	0.00287563
387.8	0.00185366	0.00387025	0.00263427
388	0.00198635	0.0032332	0.00179203
388.2	0.00254662	0.00288401	0.00180812
388.4	0.00194362	0.00238095	0.00113327
388.6	0.00203247	0.00255251	0.00121894
388.8	0.00229	0.00221667	0.00126437
389	0.00296384	0.00294471	0.00207729
389.2	0.003293	0.00340976	0.00242553
389.4	0.00305137	0.00364758	0.00233278
389.6	0.00333013	0.00382775	0.00244122
389.8	0.00401793	0.00419864	0.00259565
390	0.00453508	0.00521338	0.00333498
390.2	0.0044258	0.00563387	0.00362002
390.4	0.00394526	0.00587799	0.00404078
390.6	0.00404422	0.00642145	0.00444492
390.8	0.00416486	0.00623923	0.00431444
391	0.0041837	0.00642393	0.00407426
391.2	0.00478973	0.00651181	0.00389659
391.4	0.00474572	0.00675348	0.00410916
391.6	0.00512071	0.00707043	0.0038708
391.8	0.00522803	0.00687633	0.00376945
392	0.00479136	0.00616631	0.00364201
392.2	0.00421973	0.00565949	0.00345002
392.4	0.00436646	0.0058772	0.0033812
392.6	0.00458206	0.00583022	0.00388019
392.8	0.00486397	0.00575921	0.0042562
393	0.00532579	0.0059907	0.00410032
393.2	0.0052683	0.0057964	0.00401851
393.4	0.00516263	0.00581341	0.00421752
393.6	0.00539599	0.0060541	0.00409324
393.8	0.0050981	0.0056312	0.00343823
394	0.00458897	0.00602787	0.00392203
394.2	0.00429938	0.00568553	0.0035286
394.4	0.00432847	0.00542253	0.0030695
394.6	0.00444767	0.00532922	0.00298996
394.8	0.00442766	0.00498388	0.00256857
395	0.00440121	0.0049287	0.00251137
395.2	0.00445845	0.00482672	0.00243661
395.4	0.00423011	0.00502973	0.00264566
395.6	0.00408982	0.00500159	0.0024612
395.8	0.00300601	0.004612	0.002568
396	0.00221719	0.00459581	0.00272868
396.2	0.00180294	0.00453858	0.00278542
396.4	0.00269124	0.00514702	0.00364881
396.6	0.0026725	0.00500157	0.00417296
396.8	0.0033809	0.00550264	0.00446401
397	0.00359514	0.00549214	0.00454069
397.2	0.00383244	0.00588514	0.00481939
397.4	0.0038805	0.00619284	0.00474386
397.6	0.0038013	0.0064075	0.00452468
397.8	0.00397196	0.00656313	0.00466626
398	0.00422295	0.00714909	0.00446818
398.2	0.00451047	0.00675217	0.00387018
398.4	0.00527198	0.0069673	0.0040433
398.6	0.00501808	0.00610774	0.00398627
398.8	0.00498462	0.00610476	0.00386005
399	0.00530014	0.00613705	0.00444563
399.2	0.00505657	0.00576313	0.00431363
399.4	0.00535655	0.0059542	0.00451701
399.6	0.00465705	0.0060333	0.00438935
399.8	0.00410197	0.00593119	0.00430083
400	0.00405705	0.00634738	0.00470936
400.2	0.00424025	0.00624125	0.00489255
400.4	0.00463742	0.00637661	0.00528319
400.6	0.00416079	0.00606486	0.00483632
400.8	0.00429699	0.00627102	0.00462413
401	0.00392782	0.00588692	0.00438214
401.2	0.0035331	0.00624977	0.00388355
401.4	0.00349913	0.00664452	0.00343262
401.6	0.00361906	0.00680474	0.00356818
401.8	0.00379636	0.00679328	0.00357426
402	0.00333814	0.00659364	0.00271874
402.2	0.00344257	0.00631439	0.00273239
402.4	0.00362366	0.00613672	0.00274022
402.6	0.00339676	0.00567722	0.00222705
402.8	0.0036985	0.00600754	0.00221128
403	0.00328529	0.00512777	0.00173357
403.2	0.00324287	0.00511528	0.00133577
403.4	0.00336768	0.00552379	0.0015431
403.6	0.00280605	0.00598412	0.00163889
403.8	0.00293659	0.00580676	0.00175832
404	0.0027026	0.00592453	0.00223671
404.2	0.00294711	0.00569253	0.0024397
404.4	0.00277488	0.0055616	0.00215251
404.6	0.00290987	0.00543411	0.00204076
404.8	0.00316814	0.00599543	0.00222888
405	0.0031883	0.006057	0.00239644
405.2	0.00326498	0.00639976	0.00232554
405.4	0.00396847	0.00714041	0.00254598
405.6	0.00426842	0.00702395	0.00314633
405.8	0.00434538	0.00670728	0.00308748
406	0.00448879	0.00623773	0.00296781
406.2	0.00480712	0.00628795	0.00309404
406.4	0.00454961	0.00576752	0.00245565
406.6	0.0050245	0.00593517	0.00254808
406.8	0.00460207	0.00480646	0.00138325
407	0.00399598	0.00435948	0.00081453
407.2	0.00416653	0.00485165	0.00083132
407.4	0.0036306	0.00453987	0.00045501
407.6	0.00327216	0.00450741	0.00042362
407.8	0.00313481	0.0042868	0.00060818
408	0.00265602	0.00430547	0.00048615
408.2	0.00261614	0.00425238	0.00040312
408.4	0.00258479	0.00433826	1.511e-05
408.6	0.00277899	0.00491565	0.00083234
408.8	0.00280693	0.00586126	0.00166325
409	0.0026786	0.00612825	0.00201731
409.2	0.0027077	0.00631984	0.00271882
409.4	0.00302128	0.00671439	0.00369074
409.6	0.00317606	0.00634613	0.00437346
409.8	0.00305618	0.00603476	0.00432736
410	0.0034915	0.00628749	0.0046118
410.2	0.00380908	0.00629408	0.00445069
410.4	0.00406928	0.00604455	0.00421898
410.6	0.00445521	0.00586051	0.00445684
410.8	0.0047494	0.00495175	0.00344322
411	0.00541925	0.00520641	0.00409726
411.2	0.00583749	0.00531959	0.00377934
411.4	0.00560492	0.00482435	0.00330874
411.6	0.00578605	0.00499197	0.00365495
411.8	0.00557039	0.00444785	0.00350168
412	0.00521065	0.0042386	0.00301834
412.2	0.00538636	0.00423206	0.0028234
412.4	0.00560967	0.00428389	0.0026512
412.6	0.00590782	0.00535776	0.00342442
412.8	0.00598267	0.00564582	0.00340109
413	0.00535728	0.00540817	0.00300425
413.2	0.00500983	0.00530008	0.003506
413.4	0.00476178	0.00523601	0.0032543
413.6	0.00436166	0.00477988	0.00321047
413.8	0.00402641	0.00507342	0.00281416
414	0.0040199	0.00552993	0.00269542
414.2	0.00360347	0.00562312	0.00259162
414.4	0.00319884	0.00574853	0.00282415
414.6	0.00317166	0.00546697	0.00331946
414.8	0.00333127	0.00524391	0.00305216
415	0.00324052	0.00534544	0.00341327
415.2	0.00320391	0.00549878	0.0030484
415.4	0.00273309	0.00520194	0.0028607
415.6	0.00250638	0.0052391	0.00301974
415.8	0.00247181	0.00509988	0.00321598
416	0.00290569	0.00558542	0.00323337
416.2	0.00305361	0.00530115	0.00268707
416.4	0.00365467	0.00557398	0.00301297
416.6	0.00369611	0.00545126	0.00268171
416.8	0.00321839	0.00450441	0.00209175
417	0.00321594	0.00437324	0.00201739
417.2	0.00296806	0.0040976	0.00176933
417.4	0.00399744	0.00429415	0.00220302
417.6	0.00411584	0.00391635	0.00239297
417.8	0.00416986	0.00455824	0.00232367
418	0.0039951	0.00495409	0.00196317
418.2	0.00376826	0.00474098	0.00187364
418.4	0.00372549	0.00508122	0.0017631
418.6	0.00386481	0.00504571	0.00217303
418.8	0.00390663	0.0053854	0.00190532
419	0.00370599	0.00569264	0.00183741
419.2	0.00346402	0.00591278	0.00164836
419.4	0.003116	0.00580644	0.00156865
419.6	0.00337203	0.0063345	0.00186697
419.8	0.00348892	0.00627354	0.00209472
420	0.00342567	0.00562162	0.00163455
420.2	0.00324692	0.00498423	0.00130357
420.4	0.00304773	0.00445383	0.00118287
420.6	0.00257557	0.00348441	0.00044933
420.8	0.00266054	0.00340607	0.00094522
421	0.0031182	0.0036277	0.0019476
421.2	0.00343361	0.00374873	0.00244875
421.4	0.00427203	0.0040786	0.00322267
421.6	0.00400962	0.00399667	0.00343699
421.8	0.00404837	0.00465753	0.00368524
422	0.00430891	0.0047064	0.00340815
422.2	0.00428431	0.00431098	0.00372165
422.4	0.0041336	0.00511866	0.00375559
422.6	0.00405114	0.00503777	0.00418771
422.8	0.00391032	0.00551246	0.0043214
423	0.00364443	0.0054025	0.00406461
423.2	0.00409804	0.00592065	0.00401055
423.4	0.00449837	0.00633148	0.00366787
423.6	0.00442846	0.00648851	0.00350667
423.8	0.00459099	0.0061285	0.00345756
424	0.00517479	0.00636696	0.00372684
424.2	0.00535621	0.00673502	0.00317612
424.4	0.00489166	0.00648785	0.00266359
424.6	0.0051581	0.00686673	0.00253048
424.8	0.00539503	0.0075008	0.00299411
425	0.00531392	0.00757071	0.00320339
425.2	0.00529709	0.00776225	0.0027174
425.4	0.00509043	0.00794518	0.00256567
425.6	0.00546778	0.00793867	0.00325005
425.8	0.00497106	0.00754563	0.00258958
426	0.00500631	0.00700789	0.00247366
426.2	0.00426133	0.00623332	0.00238365
426.4	0.00364181	0.00618769	0.0023464
426.6	0.00349033	0.0054561	0.00256511
426.8	0.00338201	0.0054538	0.00278166
427	0.00381485	0.00504321	0.00289571
427.2	0.00383695	0.00508807	0.00279323
427.4	0.00318383	0.00439395	0.00277225
427.6	0.00343782	0.00408291	0.00315124
427.8	0.00440928	0.00440494	0.00384917
428	0.00469637	0.00456898	0.00407212
428.2	0.00453052	0.00443912	0.00345703
428.4	0.00464078	0.00400336	0.00347235
428.6	0.00476561	0.0041225	0.00307867
428.8	0.00491512	0.00421827	0.00302929
429	0.00481472	0.00450612	0.00327544
429.2	0.0049878	0.00515066	0.00332789
429.4	0.00518994	0.00564295	0.00385658
429.6	0.00525384	0.00555346	0.00418338
429.8	0.00465121	0.00524962	0.00336497
430	0.00459215	0.00532132	0.00330459
430.2	0.004075	0.00473942	0.0029305
430.4	0.00385798	0.00465018	0.00259179
430.6	0.00420057	0.00466198	0.00273277
430.8	0.00422244	0.00519739	0.0028217
431	0.00385663	0.00538441	0.00241339
431.2	0.00355661	0.00536634	0.00226411
431.4	0.00348961	0.00537433	0.00229857
431.6	0.00394897	0.00584928	0.00222085
431.8	0.00459641	0.00640332	0.00258471
432	0.00464732	0.00608739	0.0024797
432.2	0.00467568	0.00613531	0.0022281
432.4	0.00486097	0.00633628	0.00215197
432.6	0.00511983	0.00666171	0.00199832
432.8	0.00527687	0.00682835	0.00211384
433	0.00507136	0.00685634	0.00202633
433.2	0.00550102	0.00675621	0.00213934
433.4	0.00513339	0.00618775	0.00212198
433.6	0.00470339	0.00573986	0.00165365
433.8	0.00454163	0.00510982	0.00180817
434	0.00386191	0.00461401	0.0015312
434.2	0.00328618	0.00350756	0.00092632
434.4	0.0029351	0.00303114	0.00094673
434.6	0.00278266	0.00303821	0.0017469
434.8	0.00199846	0.0026391	0.001239
435	0.00175883	0.0028777	0.00161557
435.2	0.00177438	0.00255689	0.00194692
435.4	0.00167142	0.00285228	0.00201059
435.6	0.00191255	0.0033562	0.00209931
435.8	0.00246041	0.00406611	0.00286866
436	0.00228698	0.00385025	0.00327829
436.2	0.00238771	0.00443909	0.00298092
436.4	0.00297851	0.00525741	0.00309325
436.6	0.00343792	0.00557397	0.00304451
436.8	0.00402576	0.00576363	0.00304164
437	0.00473598	0.00575735	0.00277994
437.2	0.00518642	0.00581896	0.00286697
437.4	0.0050743	0.00594777	0.00241088
437.6	0.0051762	0.00619758	0.00236841
437.8	0.00531384	0.00634338	0.00276892
438	0.00509916	0.00640192	0.00234989
438.2	0.00539688	0.00620046	0.00241345
438.4	0.00587911	0.00662912	0.002435
438.6	0.00613194	0.00670931	0.00227519
438.8	0.00615749	0.00675742	0.00213412
439	0.00671778	0.0073047	0.00270384
439.2	0.00632657	0.00710257	0.0023683
439.4	0.00681915	0.00751592	0.00246236
439.6	0.00693655	0.00796147	0.00291228
439.8	0.00644962	0.00786981	0.00320815
440	0.00636093	0.00764633	0.00339071
440.2	0.00623475	0.00798812	0.00363807
440.4	0.00616798	0.00803785	0.00377333
440.6	0.00563336	0.00755221	0.00361991
440.8	0.00573531	0.00700609	0.00356006
441	0.00514087	0.00619296	0.00301081
441.2	0.00469506	0.00593782	0.00261833
441.4	0.00413165	0.00585975	0.00265243
441.6	0.003945	0.00601107	0.00305967
441.8	0.00364291	0.00589658	0.00289294
442	0.00351388	0.00582107	0.00289043
442.2	0.00363255	0.00563479	0.00273932
442.4	0.00394395	0.00579583	0.00232229
442.6	0.00375755	0.00547777	0.00268368
442.8	0.00402992	0.00548872	0.00359338
443	0.00400764	0.00525032	0.00336336
443.2	0.00413398	0.00555781	0.00397924
443.4	0.00461998	0.00570193	0.0041806
443.6	0.00417287	0.00579206	0.00473676
443.8	0.00461297	0.00539269	0.00472088
444	0.00509855	0.00551814	0.00497402
444.2	0.00489953	0.00553326	0.00450536
444.4	0.00474953	0.00573077	0.00357384
444.6	0.00477963	0.00564439	0.00289705
444.8	0.00496343	0.00550005	0.00193266
445	0.00515513	0.00570659	0.00143488
445.2	0.00544985	0.00627897	0.00117125
445.4	0.00518517	0.00632583	0.00130756
445.6	0.00548262	0.0068744	0.00121941
445.8	0.00544319	0.00720154	0.00104825
446	0.00588146	0.0076413	0.00124635
446.2	0.00612312	0.00759308	0.00167725
446.4	0.00633333	0.00805913	0.00207695
446.6	0.00612349	0.00814675	0.00289002
446.8	0.00622375	0.00815456	0.00325883
447	0.00591037	0.00794933	0.00317272
447.2	0.00592055	0.00765767	0.00361201
447.4	0.00575187	0.00717659	0.00351027
447.6	0.00574224	0.00674304	0.00430289
447.8	0.00616013	0.00612102	0.00401982
448	0.00560887	0.00636864	0.00382465
448.2	0.00467459	0.00624735	0.00331872
448.4	0.00405514	0.00599284	0.00290797
448.6	0.00395047	0.00547896	0.00309956
448.8	0.00348543	0.00524659	0.00304189
449	0.00333983	0.00546515	0.0034551
449.2	0.00311785	0.00547372	0.00353072
449.4	0.00294504	0.00560151	0.00363844
449.6	0.0036903	0.00614422	0.00374289
449.8	0.00401449	0.00662219	0.00396771
450	0.00419657	0.00676258	0.00408759
450.2	0.00407111	0.00686006	0.00379905
450.4	0.00389768	0.00707042	0.00340971
450.6	0.00374231	0.00702627	0.00315842
450.8	0.00408236	0.00733874	0.00284364
451	0.00421652	0.00695154	0.00252383
451.2	0.00450952	0.00675616	0.00237586
451.4	0.00473918	0.00674369	0.00260203
451.6	0.00433931	0.00649495	0.00286679
451.8	0.00379751	0.00606921	0.00223301
452	0.00258664	0.00577764	0.00197666
452.2	0.00210665	0.00488883	0.00176519
452.4	0.00280753	0.00493152	0.00192635
452.6	0.00327292	0.00487613	0.00269101
452.8	0.00325746	0.00511989	0.00281941
453	0.00299683	0.0048905	0.0025819
453.2	0.00298161	0.00473092	0.00263375
453.4	0.00311148	0.00459105	0.00251656
453.6	0.00332529	0.00441329	0.00256521
453.8	0.00319825	0.00459506	0.00254202
454	0.00285347	0.0047947	0.00251925
454.2	0.0029113	0.00474303	0.00208426
454.4	0.00301432	0.00501001	0.00238946
454.6	0.00361351	0.00570666	0.00255896
454.8	0.00395272	0.00640785	0.00268237
455	0.00393362	0.00604517	0.0026159
455.2	0.0039631	0.00625547	0.00262303
455.4	0.00359475	0.00602553	0.00248084
455.6	0.00336134	0.00625052	0.00260565
455.8	0.00368265	0.00631388	0.00261133
456	0.00359279	0.00621097	0.0024178
456.2	0.00437896	0.00653128	0.00259164
456.4	0.00514302	0.00704898	0.00313637
456.6	0.00483376	0.00733833	0.00348259
456.8	0.00469417	0.00742837	0.00369243
457	0.00427008	0.00708248	0.00340289
457.2	0.00447232	0.00685917	0.00317537
457.4	0.00392008	0.00622736	0.00243877
457.6	0.00389074	0.00599612	0.00206812
457.8	0.00412183	0.00610583	0.00206736
458	0.00428311	0.00619095	0.00233646
458.2	0.00527007	0.00599221	0.00228995
458.4	0.00555598	0.00619903	0.00216997
458.6	0.00542024	0.00575356	0.00169018
458.8	0.00534956	0.00574923	0.00173233
459	0.00515807	0.00529553	0.00145035
459.2	0.00517827	0.00550278	0.00127842
459.4	0.00522254	0.00592964	0.00133272
459.6	0.00516146	0.00595238	0.00163469
459.8	0.00533571	0.00582873	0.00180004
460	0.00508533	0.00567153	0.00208194
460.2	0.00536231	0.00581536	0.00300511
460.4	0.00539999	0.00600533	0.00357156
460.6	0.00479592	0.00619592	0.00392434
460.8	0.00487363	0.00604568	0.00453782
461	0.00465199	0.0061928	0.00401345
461.2	0.00470131	0.00575782	0.00378022
461.4	0.00457367	0.00546225	0.0035116
461.6	0.00473348	0.0053073	0.00366497
461.8	0.00475594	0.00524181	0.00404456
462	0.00462994	0.004887	0.00390468
462.2	0.00402143	0.00447343	0.00360202
462.4	0.0033609	0.00415844	0.0027387
462.6	0.00325224	0.00404559	0.00249259
462.8	0.00367712	0.00448584	0.00240352
463	0.00345277	0.00502425	0.00200925
463.2	0.00401665	0.00552299	0.00205863
463.4	0.00430056	0.00568976	0.00213285
463.6	0.00480221	0.00549105	0.00210531
463.8	0.00563432	0.00572335	0.002066
464	0.005791	0.00589734	0.00205421
464.2	0.00611146	0.00572137	0.00201172
464.4	0.00584463	0.00563602	0.0017474
464.6	0.00504402	0.00546631	0.00173166
464.8	0.00532192	0.00597029	0.00173709
465	0.00520742	0.00559023	0.00102547
465.2	0.00472641	0.00514819	0.00128599
465.4	0.00434434	0.00514856	0.00145299
465.6	0.0035377	0.00501998	0.00137436
465.8	0.00315142	0.00478029	0.00131008
466	0.00259717	0.00440173	0.0011862
466.2	0.00208252	0.00489473	0.00136069
466.4	0.00222988	0.00483465	0.00131727
466.6	0.00264491	0.00498279	0.00182173
466.8	0.00272496	0.00476919	0.00178792
467	0.00332553	0.00519858	0.00244789
467.2	0.00402048	0.00523908	0.00282593
467.4	0.00450587	0.00533916	0.00342147
467.6	0.0049574	0.0054776	0.00301123
467.8	0.00518349	0.00563774	0.002882
468	0.00515872	0.00555532	0.00292627
468.2	0.00517385	0.00515222	0.00277829
468.4	0.00484764	0.00505041	0.00274265
468.6	0.00441319	0.00515723	0.00267876
468.8	0.00491032	0.00558163	0.00265465
469	0.00456708	0.00526177	0.00250305
469.2	0.00402546	0.00545129	0.00267135
469.4	0.00396838	0.00558061	0.0026164
469.6	0.00408649	0.00563494	0.00227399
469.8	0.00419169	0.0054057	0.00190862
470	0.00449929	0.00595094	0.00199317
470.2	0.00417577	0.00574473	0.00180044
470.4	0.00452379	0.00565556	0.00179715
470.6	0.00485633	0.00539667	0.00167945
470.8	0.00545182	0.0055256	0.00202558
471	0.00616661	0.00596583	0.00228876
471.2	0.00592785	0.00564698	0.00203289
471.4	0.00620407	0.00568914	0.00229189
471.6	0.00609717	0.00568922	0.0018313
471.8	0.00599621	0.00557076	0.00196282
472	0.00549825	0.00524328	0.00191139
472.2	0.00541687	0.00553083	0.00194461
472.4	0.00512849	0.00583766	0.00207415
472.6	0.00509243	0.00622295	0.00220455
472.8	0.00488753	0.00668563	0.00221505
473	0.00438456	0.00626818	0.00195747
473.2	0.00403332	0.0057387	0.00207203
473.4	0.00431042	0.00570751	0.00214296
473.6	0.00467671	0.0057057	0.00188959
473.8	0.00463641	0.00561672	0.00164028
474	0.00462967	0.00613853	0.00164981
474.2	0.00477942	0.00575085	0.00186839
474.4	0.00535942	0.00643811	0.00248496
474.6	0.00584626	0.00644534	0.00315608
474.8	0.00565913	0.00654299	0.0036123
475	0.00572798	0.00653816	0.00331946
475.2	0.00564916	0.00645655	0.00347379
475.4	0.00564535	0.00642957	0.00387663
475.6	0.00530677	0.00619484	0.00367728
475.8	0.00505124	0.00600481	0.00364553
476	0.00477183	0.00638879	0.0036207
476.2	0.0052909	0.00667857	0.0037954
476.4	0.00533084	0.00653315	0.00407338
476.6	0.00551847	0.00657527	0.00396671
476.8	0.00526642	0.00638566	0.00345486
477	0.00569824	0.00587966	0.00326708
477.2	0.00616924	0.00620922	0.004006
477.4	0.00669447	0.00629741	0.00377576
477.6	0.0065175	0.00603517	0.00334334
477.8	0.00655706	0.00601383	0.00330091
478	0.00653758	0.00628979	0.0034327
478.2	0.00689137	0.00594856	0.00377651
478.4	0.006615	0.00601665	0.00375111
478.6	0.0064571	0.0057003	0.00377621
478.8	0.00567698	0.00507114	0.00301838
479	0.00587126	0.0048629	0.00243228
479.2	0.00554128	0.00465179	0.00213627
479.4	0.00478962	0.00399486	0.00169318
479.6	0.00431732	0.00390472	0.00129413
479.8	0.00436836	0.0041602	0.0014573
480	0.00412152	0.00418711	0.00136676
480.2	0.00418985	0.00392806	0.00138772
480.4	0.00409222	0.00438587	0.00121887
480.6	0.00387804	0.0046686	0.00103136
480.8	0.00340628	0.0046164	0.00091355
481	0.00383412	0.00481377	0.00152449
481.2	0.0037011	0.0048681	0.00155501
481.4	0.00349868	0.0044422	0.00107613
481.6	0.00339872	0.00479763	0.00104482
481.8	0.00389748	0.00531657	0.00155414
482	0.00424077	0.00589324	0.00182024
482.2	0.00491914	0.0059121	0.00211339
482.4	0.00523764	0.00590476	0.00212768
482.6	0.00500649	0.00563869	0.00213279
482.8	0.00516132	0.00609556	0.00198369
483	0.00547226	0.00671555	0.00214596
483.2	0.00583974	0.00743989	0.00233301
483.4	0.00608212	0.00766615	0.00245709
483.6	0.006207	0.00799968	0.00278631
483.8	0.00687935	0.0084179	0.00384224
484	0.00676202	0.00837013	0.0038506
484.2	0.00688902	0.00816501	0.00415502
484.4	0.00694107	0.00857281	0.00442289
484.6	0.00666321	0.00801395	0.00497113
484.8	0.00610845	0.00712259	0.00445393
485	0.00583107	0.00644379	0.00414839
485.2	0.00525046	0.00573251	0.00335106
485.4	0.00499315	0.00556698	0.00336863
485.6	0.00510541	0.00583445	0.00362814
485.8	0.00560695	0.00587343	0.00380321
486	0.00561196	0.00576978	0.00396042
486.2	0.00592325	0.00606771	0.00434882
486.4	0.00599923	0.00624359	0.00370591
486.6	0.0056206	0.00607576	0.00321774
486.8	0.00616912	0.00687435	0.00357055
487	0.00667727	0.00711387	0.00387294
487.2	0.00710834	0.00767769	0.00401395
487.4	0.00729122	0.00769749	0.00433627
487.6	0.00713594	0.00752984	0.00431393
487.8	0.00784452	0.00819655	0.00484551
488	0.00758361	0.00817919	0.00434429
488.2	0.00778321	0.0079889	0.00454464
488.4	0.00740934	0.00769761	0.00411415
488.6	0.00678629	0.00686012	0.00320245
488.8	0.00607117	0.00601481	0.00239724
489	0.00565774	0.00605065	0.0019602
489.2	0.00546882	0.00608116	0.00227944
489.4	0.00541776	0.00621951	0.00269259
489.6	0.00524947	0.00659304	0.00243976
489.8	0.00557074	0.00642273	0.00249894
490	0.00550188	0.0067404	0.0032746
490.2	0.00589507	0.00725525	0.0036191
490.4	0.0058451	0.00731854	0.00352535
490.6	0.00608911	0.00757117	0.00420825
490.8	0.00651459	0.0080797	0.00525861
491	0.00680829	0.0084257	0.0056548
491.2	0.006822	0.00874755	0.00573925
491.4	0.00690742	0.00887002	0.00582615
491.6	0.00663906	0.00839384	0.0051702
491.8	0.00687441	0.00853378	0.00490635
492	0.00705746	0.00805612	0.00461557
492.2	0.00713039	0.00781342	0.00452648
492.4	0.0064821	0.00742334	0.00415879
492.6	0.00586275	0.00736848	0.00349439
492.8	0.0054811	0.00701424	0.00357623
493	0.00540544	0.00697163	0.00350692
493.2	0.00529425	0.00645074	0.00344937
493.4	0.00521163	0.00588301	0.00310498
493.6	0.00484957	0.00546186	0.00259618
493.8	0.00524558	0.00467878	0.00279342
494	0.00505418	0.00477919	0.00331065
494.2	0.00549586	0.0048488	0.00325551
494.4	0.00579635	0.00536174	0.00346899
494.6	0.00622193	0.00517074	0.00307612
494.8	0.00648684	0.0051695	0.00336664
495	0.00695064	0.00581064	0.00373392
495.2	0.00699957	0.00557314	0.0039237
495.4	0.00667855	0.00579205	0.00363108
495.6	0.00600911	0.00494066	0.00306407
495.8	0.00624828	0.00483058	0.00302168
496	0.00643094	0.00545501	0.00341328
496.2	0.00614744	0.00556887	0.00344323
496.4	0.00567112	0.00534208	0.003248
496.6	0.0052584	0.00500904	0.00259108
496.8	0.00513069	0.00487754	0.00255552
497	0.00544541	0.0047761	0.00260047
497.2	0.00548491	0.00507818	0.00217668
497.4	0.00550101	0.00518296	0.00211862
497.6	0.00528617	0.00539787	0.00175509
497.8	0.00582016	0.00562315	0.00173917
498	0.00599429	0.00598661	0.00188903
498.2	0.00645001	0.00645631	0.00177054
498.4	0.00638164	0.00664058	0.00171233
498.6	0.00636298	0.0067413	0.00166797
498.8	0.00636003	0.00759662	0.00225361
499	0.00632358	0.00828548	0.00242341
499.2	0.00593107	0.00801641	0.00232591
499.4	0.00528605	0.00806704	0.00183783
499.6	0.00503525	0.00767476	0.00179545
499.8	0.00526793	0.00743798	0.001565
500	0.00547127	0.00764267	0.00171626
500.2	0.0053074	0.00705206	0.00186894
500.4	0.0049217	0.00654868	0.00159224
500.6	0.00520872	0.00640312	0.00168179
500.8	0.00498715	0.00623734	0.00173919
501	0.00500046	0.00595234	0.00161061
501.2	0.0053534	0.0063966	0.00214624
501.4	0.00485195	0.00623486	0.00221582
501.6	0.00477862	0.00582262	0.00241255
501.8	0.00504063	0.0053559	0.00257683
502	0.00473343	0.0048792	0.00216876
502.2	0.00450981	0.00482742	0.00248559
502.4	0.00446238	0.00463592	0.00207761
502.6	0.00470927	0.00484326	0.00220577
502.8	0.00470314	0.00481511	0.00204587
503	0.00507991	0.00544929	0.00239268
503.2	0.00572171	0.00551865	0.00294955
503.4	0.00565574	0.00565178	0.0028108
503.6	0.00635451	0.00633486	0.00291412
503.8	0.00708057	0.00667427	0.00321749
504	0.00761139	0.00746139	0.00362602
504.2	0.00791364	0.00789209	0.0042706
504.4	0.00811777	0.00791293	0.00422093
504.6	0.0085923	0.00785882	0.00446069
504.8	0.00815031	0.00730788	0.00404734
505	0.00872801	0.00775878	0.00470528
505.2	0.00907134	0.00813108	0.00556475
505.4	0.00804547	0.00758565	0.00501296
505.6	0.00821016	0.00663743	0.00433558
505.8	0.00756089	0.00592078	0.00344995
506	0.00691863	0.00572197	0.00271293
506.2	0.00713378	0.00563777	0.00264171
506.4	0.00751792	0.00565046	0.00240279
506.6	0.00734857	0.00547356	0.00264526
506.8	0.00720907	0.00571838	0.00331699
507	0.00694358	0.00632305	0.0037654
507.2	0.0072158	0.00666026	0.00392703
507.4	0.0070815	0.00706855	0.00412144
507.6	0.00732703	0.00801222	0.00402656
507.8	0.00681791	0.00813544	0.00385163
508	0.00635413	0.00851522	0.00406065
508.2	0.00628908	0.00836124	0.00425572
508.4	0.00545923	0.00785983	0.00421115
508.6	0.00533723	0.00773476	0.00467303
508.8	0.00522668	0.00743485	0.00446284
509	0.0054381	0.00786155	0.00518031
509.2	0.00485367	0.00717507	0.00487261
509.4	0.00395645	0.00652653	0.00418837
509.6	0.00424814	0.00602145	0.00373716
509.8	0.00450623	0.00607967	0.00389879
510	0.0051918	0.00641289	0.00426661
510.2	0.00617648	0.00652378	0.00452563
510.4	0.00659943	0.0069337	0.00503486
510.6	0.00662017	0.00706816	0.00507726
510.8	0.0071001	0.00785902	0.00524836
511	0.00699444	0.00796383	0.00455988
511.2	0.00757022	0.00879039	0.00468577
511.4	0.00767154	0.00881375	0.00455955
511.6	0.00719727	0.00867395	0.00356359
511.8	0.0065272	0.00862466	0.00352004
512	0.00604461	0.00858702	0.0037509
512.2	0.00575386	0.00790957	0.00324188
512.4	0.00554733	0.00780807	0.00356469
512.6	0.00562834	0.00799483	0.00374526
512.8	0.00602095	0.00803108	0.00388336
513	0.00561187	0.00765548	0.00436283
513.2	0.00528959	0.00662218	0.00418594
513.4	0.00551469	0.00653618	0.00431136
513.6	0.00623704	0.00650058	0.00490121
513.8	0.00660954	0.00654001	0.00519186
514	0.00682707	0.00648188	0.00529821
514.2	0.00720375	0.00667835	0.00550207
514.4	0.00741794	0.00693419	0.00534158
514.6	0.0075009	0.00713299	0.00536329
514.8	0.00746673	0.0071148	0.00504294
515	0.00763651	0.00687757	0.00474556
515.2	0.00810843	0.00743163	0.00477701
515.4	0.0079485	0.00709544	0.00405326
515.6	0.00811241	0.00720343	0.00405269
515.8	0.00802352	0.00754052	0.00411209
516	0.00768153	0.00708016	0.00350304
516.2	0.00794502	0.0070081	0.00297622
516.4	0.00780667	0.00741612	0.00307725
516.6	0.00771291	0.00790524	0.00326229
516.8	0.00763909	0.00827115	0.00350784
517	0.00718153	0.00762032	0.00327138
517.2	0.00728144	0.00729065	0.0034707
517.4	0.00733507	0.00763078	0.00377244
517.6	0.00731452	0.00814949	0.00407585
517.8	0.00725551	0.0083986	0.00393461
518	0.00730008	0.00821169	0.00431311
518.2	0.00692772	0.00816908	0.00460191
518.4	0.00717466	0.00801749	0.00443343
518.6	0.00681859	0.00756591	0.00454476
518.8	0.00652829	0.0069427	0.00415655
519	0.00643338	0.0068801	0.00355208
519.2	0.00637117	0.00684314	0.00298178
519.4	0.0061909	0.00649341	0.00266417
519.6	0.00644184	0.00647653	0.00272205
519.8	0.00588757	0.00575342	0.00234859
520	0.00577315	0.00575581	0.00208076
520.2	0.00557314	0.00544927	0.00183252
520.4	0.00521694	0.00533164	0.00173908
520.6	0.00588584	0.00572902	0.00193551
520.8	0.00607384	0.00567012	0.00199276
521	0.00549733	0.00494415	0.00219476
521.2	0.0058278	0.00523448	0.0028728
521.4	0.00613292	0.00560875	0.00317714
521.6	0.00655484	0.00582364	0.003289
521.8	0.00725401	0.00611401	0.00402491
522	0.00777595	0.00581675	0.00466136
522.2	0.00795	0.00590192	0.0049918
522.4	0.00824849	0.00643315	0.00526788
522.6	0.00781545	0.00654215	0.00558604
522.8	0.00785185	0.0069188	0.00603746
523	0.00746426	0.00751931	0.00605311
523.2	0.00731928	0.00789829	0.00636666
523.4	0.00688099	0.00777549	0.00623441
523.6	0.00669224	0.00749227	0.00638583
523.8	0.00651475	0.00695397	0.00689415
524	0.00641384	0.00728942	0.00688189
524.2	0.00612442	0.00699059	0.00691899
524.4	0.00595901	0.00693985	0.00645457
524.6	0.00663545	0.0071026	0.00659693
524.8	0.00633559	0.0066008	0.00657703
525	0.00547298	0.00614135	0.00628675
525.2	0.0058202	0.00628689	0.00597505
525.4	0.00579337	0.00581522	0.00520411
525.6	0.0060501	0.0053984	0.00447881
525.8	0.00652584	0.00528033	0.00447259
526	0.00620546	0.00483716	0.0036722
526.2	0.00600279	0.00504405	0.00340557
526.4	0.00553922	0.00543278	0.00314638
526.6	0.00627894	0.00584051	0.0035974
526.8	0.00629159	0.00609354	0.00350223
527	0.00616179	0.00653302	0.00334615
527.2	0.00609662	0.00630926	0.0030515
527.4	0.00581451	0.00566013	0.0023698
527.6	0.00604134	0.0057991	0.00268345
527.8	0.00617185	0.00606713	0.00280659
528	0.00599788	0.00620004	0.00227162
528.2	0.00619114	0.00632924	0.00210161
528.4	0.00614973	0.00572934	0.00180349
528.6	0.00698478	0.00572492	0.00200681
528.8	0.00669196	0.00550742	0.00180642
529	0.00653203	0.00526064	0.00137982
529.2	0.00654993	0.00541387	0.00128151
529.4	0.00647857	0.00518065	0.00108333
529.6	0.0063824	0.00527018	0.00136922
529.8	0.00633893	0.00532703	0.00151828
530	0.00614354	0.00559334	0.0016469
530.2	0.00626643	0.00541513	0.00194873
530.4	0.00666798	0.00582044	0.00250308
530.6	0.00756355	0.00609953	0.00343901
530.8	0.00728909	0.0062078	0.003574
531	0.00753187	0.00657055	0.00405357
531.2	0.00722094	0.00618887	0.00398927
531.4	0.00722195	0.00605363	0.00403959
531.6	0.00755291	0.00637824	0.00428976
531.8	0.00737694	0.00669487	0.00401057
532	0.00663747	0.00647651	0.0037341
532.2	0.00666374	0.00648845	0.0034261
532.4	0.00651406	0.00631063	0.00342487
532.6	0.00709083	0.00678564	0.00367417
532.8	0.00671341	0.00667068	0.00294046
533	0.00623776	0.00629418	0.00248603
533.2	0.00543463	0.00651439	0.00191037
533.4	0.00541265	0.00637622	0.00184403
533.6	0.00568047	0.00662283	0.00178759
533.8	0.00587319	0.00627591	0.00137589
534	0.00600852	0.00627592	0.0016335
534.2	0.00590813	0.00589123	0.00180534
534.4	0.00602383	0.00634456	0.0023721
534.6	0.00582616	0.00643179	0.00254319
534.8	0.00548989	0.00693722	0.00253939
535	0.00542433	0.00731897	0.00305689
535.2	0.00544883	0.00772181	0.00364288
535.4	0.0057997	0.00795983	0.00394176
535.6	0.00596291	0.00835094	0.00443364
535.8	0.00607046	0.00902672	0.00479601
536	0.00628662	0.00886628	0.00511968
536.2	0.00693102	0.00881494	0.00488887
536.4	0.0073712	0.00893155	0.00533179
536.6	0.0082122	0.00887564	0.00535744
536.8	0.00767191	0.00828516	0.00440375
537	0.00726296	0.00748352	0.0040657
537.2	0.00721631	0.00726507	0.00370692
537.4	0.00779262	0.00685097	0.0039281
537.6	0.00812539	0.00690342	0.00392726
537.8	0.00805771	0.00633693	0.00397777
538	0.00825253	0.00659731	0.00433129
538.2	0.00733218	0.00628634	0.00415311
538.4	0.00753073	0.00657392	0.0037279
538.6	0.00688954	0.00704706	0.00339216
538.8	0.00623422	0.00711309	0.00309345
539	0.0064465	0.00738801	0.0035721
539.2	0.00673885	0.00782933	0.00403105
539.4	0.00706768	0.00818579	0.00445078
539.6	0.00756534	0.00860839	0.00556524
539.8	0.00756722	0.00888851	0.00584594
540	0.00755391	0.00874109	0.00618407
540.2	0.0076275	0.00877384	0.00611821
540.4	0.00767444	0.00877346	0.00664607
540.6	0.00742733	0.00870215	0.00646087
540.8	0.00632775	0.00845643	0.00626083
541	0.00591725	0.00825819	0.00604989
541.2	0.0056295	0.00807849	0.00562741
541.4	0.00535818	0.00744178	0.00531584
541.6	0.00505465	0.0070734	0.00512565
541.8	0.00498834	0.00664434	0.00456853
542	0.00501824	0.00616067	0.00388298
542.2	0.00418901	0.00542536	0.00275764
542.4	0.00422961	0.00520033	0.00216676
542.6	0.00396179	0.00505401	0.00229459
542.8	0.00456167	0.00515073	0.00228958
543	0.0048415	0.00536334	0.0024395
543.2	0.00549788	0.00550046	0.00290471
543.4	0.006053	0.00653867	0.00385366
543.6	0.00615812	0.00653985	0.00419642
543.8	0.00600212	0.00644573	0.00367595
544	0.00646268	0.00690808	0.00401042
544.2	0.00630521	0.00699127	0.00382147
544.4	0.00620427	0.00754961	0.00406741
544.6	0.00627969	0.00813534	0.00412452
544.8	0.00651494	0.00862398	0.00458365
545	0.00615417	0.00865616	0.00420404
545.2	0.00579812	0.00804935	0.00402929
545.4	0.00553491	0.00828923	0.00428374
545.6	0.00527597	0.00824066	0.00379926
545.8	0.0055636	0.00844787	0.0039906
546	0.00554194	0.00803939	0.00373181
546.2	0.00544575	0.00811863	0.00369258
546.4	0.00555449	0.00815089	0.00420028
546.6	0.00562994	0.0081343	0.00433742
546.8	0.00579114	0.00869185	0.00394118
547	0.00529511	0.00815874	0.00346425
547.2	0.00585499	0.00813532	0.00397978
547.4	0.00607979	0.00872422	0.00432524
547.6	0.00610544	0.00795406	0.0040735
547.8	0.00685685	0.00816774	0.004186
548	0.00685396	0.00868474	0.0044162
548.2	0.00684707	0.00867629	0.00459514
548.4	0.00749326	0.00914865	0.00494362
548.6	0.00764158	0.00875445	0.00519534
548.8	0.00729557	0.00877706	0.00515576
549	0.00685261	0.00836248	0.0044353
549.2	0.00690203	0.0085398	0.00467761
549.4	0.00657418	0.00852414	0.00449568
549.6	0.00672662	0.00800574	0.00427568
549.8	0.0068319	0.00759345	0.00422592
550	0.00671629	0.00729622	0.00378167
550.2	0.0062772	0.00711212	0.0032756
550.4	0.00570016	0.00658769	0.00305352
550.6	0.00521092	0.00635029	0.0024509
550.8	0.00551403	0.0061507	0.00257471
551	0.00569969	0.00615929	0.00311703
551.2	0.00648806	0.00639453	0.0038268
551.4	0.00693698	0.00683804	0.00440315
551.6	0.00735011	0.00701087	0.00501642
551.8	0.00801639	0.0072363	0.00588931
552	0.00777951	0.00739	0.00614409
552.2	0.00816267	0.00785186	0.00679573
552.4	0.00825937	0.00828346	0.00715061
552.6	0.00777909	0.00844878	0.00704774
552.8	0.00762744	0.00927688	0.00713281
553	0.00749558	0.0091869	0.00724992
553.2	0.00694148	0.00962579	0.0075869
553.4	0.00640515	0.00940927	0.00698711
553.6	0.00609059	0.00901477	0.00679663
553.8	0.0056962	0.00824859	0.00610196
554	0.00562983	0.00845634	0.00576066
554.2	0.00510166	0.00791018	0.00468364
554.4	0.00536151	0.00770376	0.00433167
554.6	0.00550732	0.0072638	0.00382591
554.8	0.0059783	0.00723491	0.00389403
555	0.00623096	0.00756834	0.003349
555.2	0.00655684	0.00708114	0.00281262
555.4	0.00700512	0.00699563	0.00299054
555.6	0.00691192	0.00664297	0.00295491
555.8	0.00716355	0.00579771	0.00315707
556	0.00751824	0.00671998	0.00355589
556.2	0.00761596	0.00713094	0.00394507
556.4	0.00763108	0.00699339	0.00401829
556.6	0.00705064	0.00705911	0.00363033
556.8	0.00696314	0.00771428	0.00441134
557	0.00639416	0.00725869	0.00454992
557.2	0.00622378	0.00794726	0.0047728
557.4	0.00553295	0.00760453	0.00453303
557.6	0.00528617	0.00759639	0.00488574
557.8	0.00579054	0.00843875	0.00518499
558	0.00614561	0.00876235	0.00512585
558.2	0.00551643	0.00833236	0.00452707
558.4	0.00555162	0.00843617	0.00464108
558.6	0.00532432	0.00792866	0.00417748
558.8	0.00587416	0.00796299	0.0040955
559	0.00609228	0.00742984	0.00341773
559.2	0.00628424	0.00700686	0.00320309
559.4	0.00666637	0.00662775	0.00334633
559.6	0.00654635	0.00627438	0.00267429
559.8	0.00695762	0.00629927	0.00286903
560	0.00705476	0.00648283	0.00295709
560.2	0.00698895	0.00601879	0.00247394
560.4	0.00708083	0.00576393	0.0020383
560.6	0.00627813	0.00585085	0.00194292
560.8	0.00640607	0.00642356	0.00254366
561	0.00632802	0.00652516	0.00287576
561.2	0.00646264	0.00684391	0.00346934
561.4	0.00617365	0.00703916	0.00395681
561.6	0.00666364	0.00800503	0.00492976
561.8	0.00758651	0.00872315	0.00511033
562	0.00736337	0.008346	0.00523708
562.2	0.00696311	0.00813607	0.00522625
562.4	0.0074433	0.00847661	0.00535069
562.6	0.00801544	0.00853955	0.00537305
562.8	0.00828254	0.00829069	0.00545816
563	0.00804417	0.00775408	0.00491806
563.2	0.00764236	0.00741996	0.0044918
563.4	0.0073417	0.00712387	0.00403669
563.6	0.00674131	0.00645919	0.00325016
563.8	0.0065687	0.00699917	0.00355733
564	0.00636153	0.00657529	0.00268558
564.2	0.00581661	0.00635341	0.0023178
564.4	0.00512124	0.00623803	0.00205161
564.6	0.00427122	0.00618526	0.00215319
564.8	0.00426772	0.00654	0.00239043
565	0.00469152	0.00653632	0.00297592
565.2	0.00471234	0.00680631	0.00317733
565.4	0.00474268	0.00700225	0.00333468
565.6	0.00525789	0.00778101	0.00315373
565.8	0.00550674	0.00836459	0.00248724
566	0.00599003	0.00898725	0.00296367
566.2	0.00611566	0.00910639	0.00285279
566.4	0.00636083	0.00926561	0.00272435
566.6	0.00672193	0.0094581	0.00298253
566.8	0.00639748	0.00888026	0.00241871
567	0.00640126	0.00834158	0.00182488
567.2	0.00661303	0.00802061	0.00161875
567.4	0.00672959	0.00803125	0.00176299
567.6	0.00691051	0.00771825	0.00162671
567.8	0.00740176	0.00807494	0.00165389
568	0.00720007	0.00739042	0.001115
568.2	0.00662653	0.0068748	0.00105271
568.4	0.0064218	0.00698152	0.00103987
568.6	0.00619902	0.00673636	0.0010788
568.8	0.00664652	0.00668476	0.00165195
569	0.00726549	0.00725513	0.00219414
569.2	0.0071375	0.00741676	0.00203118
569.4	0.00706028	0.00685685	0.00157762
569.6	0.00685032	0.0070189	0.00119217
569.8	0.00656589	0.00712504	0.00171444
570	0.00696884	0.0076927	0.00234144
570.2	0.00636777	0.00724641	0.00231627
570.4	0.00603785	0.0070531	0.00256664
570.6	0.00596737	0.0071886	0.0028849
570.8	0.00586757	0.00738154	0.00325452
571	0.00659123	0.0070882	0.00371528
571.2	0.00729655	0.00737767	0.0044728
571.4	0.00760141	0.00797855	0.00506207
571.6	0.00744936	0.00794211	0.00464258
571.8	0.00746722	0.00776166	0.00446903
572	0.00734737	0.00777171	0.00421289
572.2	0.00713372	0.00761911	0.00398457
572.4	0.0069616	0.00788209	0.0042289
572.6	0.00695105	0.00775702	0.00396969
572.8	0.00696228	0.00775871	0.00422667
573	0.00670011	0.00769037	0.00364114
573.2	0.00608208	0.00710358	0.0030266
573.4	0.00568573	0.00720147	0.00267822
573.6	0.00513293	0.00694504	0.00283887
573.8	0.00526421	0.00728111	0.00320273
574	0.00525	0.00761022	0.00341058
574.2	0.0047518	0.00718383	0.00355754
574.4	0.00447288	0.00687168	0.00404198
574.6	0.00417614	0.00631153	0.00434422
574.8	0.00436958	0.00656718	0.00471181
575	0.00432683	0.00573597	0.00459082
575.2	0.0042174	0.00578017	0.00490366
575.4	0.00444978	0.00617792	0.00453079
575.6	0.00458848	0.00614994	0.00432699
575.8	0.004695	0.00617577	0.00394576
576	0.00530031	0.00605132	0.00393269
576.2	0.0053727	0.00591379	0.00398513
576.4	0.00529712	0.00619643	0.00343637
576.6	0.00497192	0.00537722	0.00279313
576.8	0.00540366	0.00563294	0.00291462
577	0.00534245	0.00565032	0.0027717
577.2	0.00557591	0.00606913	0.00264672
577.4	0.00616524	0.00682264	0.0029064
577.6	0.00664854	0.00683788	0.0031238
577.8	0.00719933	0.00714472	0.00341748
578	0.00684884	0.00707781	0.00332445
578.2	0.00705442	0.00705591	0.00382133
578.4	0.00722751	0.00698914	0.0038374
578.6	0.00656916	0.0068537	0.00421533
578.8	0.00650512	0.00763757	0.0050972
579	0.00634795	0.00719382	0.00526557
579.2	0.00658497	0.0075585	0.00574995
579.4	0.00755399	0.00841918	0.00580213
579.6	0.0081045	0.00868383	0.0062122
579.8	0.00780601	0.00859351	0.00614837
580	0.00804092	0.00852887	0.00671343
580.2	0.00774583	0.00832347	0.00638568
580.4	0.00765022	0.00819805	0.00608365
580.6	0.00738471	0.00782803	0.00596685
580.8	0.00743588	0.00813207	0.00555816
581	0.00667876	0.00757026	0.00458371
581.2	0.00712921	0.00776005	0.00386179
581.4	0.00706328	0.00800695	0.00391184
581.6	0.00675025	0.00784451	0.00318268
581.8	0.00644213	0.00771499	0.00311003
582	0.00678021	0.00772176	0.0034186
582.2	0.00709538	0.00819998	0.0038177
582.4	0.00663197	0.008398	0.00370397
582.6	0.00588504	0.00784187	0.00381344
582.8	0.00618907	0.00816222	0.00422811
583	0.00640233	0.00781032	0.00405101
583.2	0.00669449	0.0080091	0.00472318
583.4	0.00718228	0.00775613	0.00489627
583.6	0.00707798	0.00741859	0.00475832
583.8	0.00667998	0.00734464	0.00510017
584	0.00737382	0.00806364	0.00562375
584.2	0.00754773	0.00813233	0.00565095
584.4	0.00735872	0.00842842	0.00608801
584.6	0.00746655	0.00831092	0.00558815
584.8	0.00746919	0.00801326	0.00546933
585	0.00763914	0.00800401	0.00514615
585.2	0.00814646	0.00899974	0.00522635
585.4	0.00748438	0.00867554	0.00510506
585.6	0.00705506	0.00825695	0.00476758
585.8	0.00740086	0.00860031	0.00578519
586	0.00752995	0.00853568	0.00610247
586.2	0.00693841	0.00840421	0.00563569
586.4	0.00658082	0.00834449	0.00553442
586.6	0.00626158	0.00781798	0.00489872
586.8	0.00692559	0.00818765	0.00547506
587	0.00645254	0.00758612	0.00474551
587.2	0.00636194	0.00699689	0.00499578
587.4	0.00640035	0.00641062	0.00444269
587.6	0.00628093	0.00654706	0.00419167
587.8	0.00633762	0.00695836	0.00426986
588	0.00651191	0.00752004	0.00446203
588.2	0.00601341	0.00743631	0.00427764
588.4	0.00575724	0.00688598	0.00421369
588.6	0.00620819	0.00637418	0.00403334
588.8	0.00630138	0.0067016	0.00394615
589	0.00644139	0.00661728	0.00360011
589.2	0.00636825	0.00675977	0.0036205
589.4	0.00618896	0.00609836	0.00367502
589.6	0.0060335	0.00605895	0.00400185
589.8	0.00648468	0.00659744	0.00468358
590	0.00659971	0.00619516	0.00426649
590.2	0.00674685	0.00651255	0.00457695
590.4	0.00676353	0.00670234	0.00493517
590.6	0.007003	0.00646762	0.00506658
590.8	0.00750042	0.00707725	0.00538983
591	0.00746832	0.00712758	0.00544478
591.2	0.0078822	0.00746055	0.00612133
591.4	0.00770867	0.0077229	0.00581021
591.6	0.00787348	0.00830738	0.0058355
591.8	0.00814469	0.00870688	0.00557491
592	0.00816989	0.00925267	0.00581486
592.2	0.00773668	0.00892641	0.0056489
592.4	0.00801433	0.00849005	0.00576019
592.6	0.0080512	0.00845011	0.00573327
592.8	0.00762115	0.00839152	0.0051716
593	0.00728573	0.0072593	0.00485128
593.2	0.00704647	0.0069246	0.0045489
593.4	0.00668847	0.00693773	0.00456411
593.6	0.00651607	0.00664804	0.00421123
593.8	0.00650367	0.00614017	0.00402369
594	0.00604714	0.00546389	0.00338251
594.2	0.00560344	0.00552235	0.0038208
594.4	0.0053255	0.00512266	0.00340877
594.6	0.00548397	0.00509592	0.0032768
594.8	0.00585656	0.00567407	0.00318477
595	0.00583025	0.00542331	0.00331146
595.2	0.00595029	0.00523537	0.00297898
595.4	0.0063522	0.00518213	0.00318406
595.6	0.00737992	0.00591263	0.00383677
595.8	0.00811763	0.00643691	0.00447117
596	0.00797632	0.00664489	0.00479248
596.2	0.00797397	0.00675635	0.0048889
596.4	0.00821313	0.00685672	0.00526514
596.6	0.00761009	0.00701348	0.00540641
596.8	0.00771074	0.00708515	0.00546462
597	0.00789863	0.00744917	0.00582416
597.2	0.00784252	0.00806638	0.00622429
597.4	0.00791011	0.00886219	0.00677081
597.6	0.00841372	0.00918394	0.00633037
597.8	0.0077815	0.00888064	0.00612434
598	0.00751996	0.00922628	0.00577733
598.2	0.00738366	0.00984105	0.00592665
598.4	0.00716686	0.00991868	0.00544217
598.6	0.00687718	0.00944798	0.00517854
598.8	0.00673358	0.00898304	0.0049558
599	0.00612933	0.00820139	0.00503276
599.2	0.0062549	0.00768116	0.00487245
599.4	0.00619594	0.00777682	0.00506995
599.6	0.00601106	0.00753232	0.00491875
599.8	0.00551558	0.00719523	0.00470778
600	0.00489917	0.00648486	0.00385195
600.2	0.0049327	0.00628935	0.00354152
600.4	0.00484934	0.00583569	0.00360279
600.6	0.00503531	0.00607565	0.0038521
600.8	0.00596428	0.00620388	0.00405891
601	0.00603256	0.00624697	0.00420837
601.2	0.00603991	0.00626636	0.00428884
601.4	0.00634239	0.00686167	0.00451134
601.6	0.00627445	0.00709671	0.00443339
601.8	0.00614239	0.00723021	0.00452597
602	0.00657673	0.00807611	0.0049082
602.2	0.00677749	0.00885229	0.00491401
602.4	0.00673433	0.00846568	0.00455443
602.6	0.00644629	0.00780867	0.00424281
602.8	0.00654738	0.00744286	0.00430831
603	0.00650909	0.00731635	0.00476222
603.2	0.00626696	0.00702108	0.00433845
603.4	0.00567548	0.00695106	0.00401142
603.6	0.00587449	0.00672978	0.00366457
603.8	0.00566935	0.00676716	0.00357677
604	0.00579629	0.00648821	0.00325363
604.2	0.00569509	0.00660643	0.00335426
604.4	0.00571971	0.00656075	0.00373722
604.6	0.00558071	0.00624462	0.003816
604.8	0.00554414	0.00612742	0.00406699
605	0.00506447	0.00601696	0.00412302
605.2	0.00497578	0.00659238	0.00492214
605.4	0.00451012	0.00669335	0.00560591
605.6	0.00444577	0.00647174	0.00502614
605.8	0.00458816	0.00669753	0.00460051
606	0.00513616	0.00690414	0.00441063
606.2	0.0054755	0.00713391	0.00413121
606.4	0.00554784	0.00683775	0.00423461
606.6	0.0055763	0.00648793	0.00406737
606.8	0.00571556	0.00658971	0.00382796
607	0.00596178	0.00673738	0.00423036
607.2	0.00599996	0.00691489	0.00366845
607.4	0.00626682	0.00695065	0.00383782
607.6	0.00660944	0.00733649	0.00407635
607.8	0.00625533	0.00707755	0.00394623
608	0.00618641	0.00672529	0.00395405
608.2	0.00618795	0.00656119	0.00405457
608.4	0.00594443	0.00613527	0.00398204
608.6	0.00588346	0.0059276	0.00399003
608.8	0.0057959	0.00600061	0.00436383
609	0.00580865	0.00619074	0.0042905
609.2	0.00594101	0.00629774	0.0050909
609.4	0.00580214	0.00595989	0.00500426
609.6	0.006525	0.00640127	0.00450427
609.8	0.00659944	0.00714364	0.00484157
610	0.00736561	0.00787248	0.00516429
610.2	0.00772717	0.00863528	0.00554736
610.4	0.00812925	0.00895283	0.00603817
610.6	0.00840775	0.00862949	0.00566477
610.8	0.00862806	0.00968773	0.00616495
611	0.00927551	0.0101546	0.00677855
611.2	0.00927098	0.0100208	0.00683287
611.4	0.00902414	0.00980963	0.0072604
611.6	0.00901092	0.0100794	0.00716634
611.8	0.00877158	0.00947913	0.00643689
612	0.00879217	0.00855579	0.00615832
612.2	0.00838754	0.00783387	0.00560537
612.4	0.0075168	0.00718797	0.00514993
612.6	0.00730982	0.0067007	0.00498786
612.8	0.00684862	0.00646291	0.00483505
613	0.00689915	0.00684611	0.00445644
613.2	0.00666459	0.00646285	0.00449817
613.4	0.00675991	0.00653863	0.00417734
613.6	0.00642583	0.00675323	0.00385199
613.8	0.00621328	0.006509	0.00354199
614	0.00663755	0.00649843	0.0032513
614.2	0.00689332	0.00656261	0.00334955
614.4	0.00697667	0.00653428	0.00362459
614.6	0.00711763	0.00676035	0.00370709
614.8	0.00765411	0.0077285	0.00484018
615	0.00785066	0.00765344	0.00474334
615.2	0.00780606	0.0076165	0.00476987
615.4	0.00766194	0.00826551	0.00490187
615.6	0.00783639	0.00816628	0.0047139
615.8	0.00786379	0.00797048	0.00468024
616	0.00761262	0.00758096	0.00494372
616.2	0.00738888	0.00750994	0.00514498
616.4	0.00741818	0.00733427	0.00543065
616.6	0.00734307	0.00686531	0.00541336
616.8	0.00691896	0.00714875	0.00515269
617	0.00659575	0.00705204	0.00434993
617.2	0.00595523	0.00641882	0.00427146
617.4	0.00564889	0.00648521	0.0040064
617.6	0.00540379	0.00649673	0.00400243
617.8	0.00554902	0.0059937	0.00379842
618	0.00579492	0.00664943	0.00408467
618.2	0.00595606	0.00704356	0.00454037
618.4	0.00639722	0.00773685	0.00470594
618.6	0.00704077	0.00818558	0.00532231
618.8	0.00765681	0.00835409	0.00588152
619	0.00775053	0.00882056	0.00554967
619.2	0.00754615	0.00854148	0.00556946
619.4	0.00723046	0.00803913	0.00553282
619.6	0.00751285	0.00787274	0.00552054
619.8	0.00746259	0.00746286	0.00541066
620	0.00710683	0.00671798	0.00493454
620.2	0.0073514	0.00625726	0.00438803
620.4	0.00729881	0.00523953	0.00375257
620.6	0.00705362	0.00440976	0.003372
620.8	0.00686302	0.00470259	0.00332975
621	0.00638049	0.00382094	0.00254472
621.2	0.00617342	0.00349808	0.00269012
621.4	0.00611751	0.00391299	0.00238049
621.6	0.00631225	0.00389062	0.0026164
621.8	0.00608356	0.0034171	0.00249272
622	0.00620343	0.00438494	0.0027738
622.2	0.00642118	0.00486822	0.00293922
622.4	0.00652456	0.00565458	0.00296085
622.6	0.00652231	0.00553544	0.00326777
622.8	0.00601947	0.00551807	0.00311651
623	0.0060853	0.00626146	0.00343501
623.2	0.00522958	0.00566385	0.00330845
623.4	0.00530129	0.00655536	0.00350257
623.6	0.00559794	0.00713854	0.0039377
623.8	0.00592364	0.0076757	0.00401591
624	0.00644859	0.0077907	0.00410542
624.2	0.00739147	0.00813345	0.0038708
624.4	0.00785421	0.00796605	0.00425992
624.6	0.00831364	0.00807264	0.00497451
624.8	0.00852194	0.00860189	0.00503931
625	0.00865668	0.00829192	0.00476121
625.2	0.00916073	0.00867545	0.00524862
625.4	0.0093503	0.00887287	0.00502113
625.6	0.00925553	0.00790823	0.00476098
625.8	0.00930681	0.00754821	0.00445792
626	0.00942225	0.00767908	0.0043309
626.2	0.00955888	0.00785728	0.00429662
626.4	0.00907648	0.00791622	0.00376628
626.6	0.00856951	0.00758922	0.00341637
626.8	0.00782652	0.00776459	0.0033327
627	0.00830524	0.00833528	0.00394789
627.2	0.00777355	0.00780178	0.00353422
627.4	0.00828943	0.00833005	0.00391556
627.6	0.00832351	0.00823204	0.00416047
627.8	0.00816463	0.00838435	0.00363169
628	0.00836803	0.00833881	0.00374559
628.2	0.00805434	0.0085831	0.00360912
628.4	0.00769828	0.00899856	0.00400174
628.6	0.00733225	0.00897487	0.00377152
628.8	0.00758613	0.00918671	0.00335008
629	0.00760168	0.00881107	0.0037097
629.2	0.00799947	0.00885203	0.00402555
629.4	0.00789502	0.00824487	0.00354107
629.6	0.00816047	0.00809432	0.00358008
629.8	0.00844133	0.0085102	0.00421841
630	0.00819345	0.00872302	0.00408048
630.2	0.00803109	0.00846535	0.00411984
630.4	0.00821014	0.00834966	0.00436077
630.6	0.00799274	0.00803454	0.0045917
630.8	0.00786107	0.00785368	0.00492265
631	0.00882628	0.00831036	0.00538742
631.2	0.00872876	0.00800052	0.00548144
631.4	0.00830146	0.00811619	0.00608484
631.6	0.00790349	0.00819168	0.00592483
631.8	0.00759721	0.0083607	0.00598388
632	0.00758394	0.00891504	0.00629757
632.2	0.00702483	0.00895709	0.00647326
632.4	0.00680606	0.00835538	0.00614863
632.6	0.00647001	0.00752173	0.00571835
632.8	0.00679151	0.00716182	0.00559396
633	0.00674118	0.00671814	0.00560803
633.2	0.00697334	0.00666836	0.00533373
633.4	0.00689401	0.00624866	0.00474653
633.6	0.00717301	0.00642552	0.00458851
633.8	0.00709656	0.00613996	0.00439151
634	0.00713952	0.00573178	0.00364232
634.2	0.00759821	0.00527026	0.00367374
634.4	0.00810419	0.00563945	0.00367817
634.6	0.00806402	0.00585919	0.00341749
[truncated: 2,001 more rows]

## Sheet: CH11-PCH17
Time1	1E-05	2.5E-06	6.25E-07
235	-0.00039408	-9.754e-05	-0.00594211
235.2	3.047e-05	6.743e-05	-0.00586001
235.4	0.00047444	0.00012745	-0.0058682
235.6	0.00146645	0.00067419	-0.00561073
235.8	0.0021559	0.00055758	-0.0055697
236	0.00276541	0.00066644	-0.00562783
236.2	0.00326685	0.00058647	-0.0059591
236.4	0.00370379	0.00102983	-0.00559192
236.6	0.00405779	0.00126108	-0.00548081
236.8	0.00398718	0.00118735	-0.00561378
237	0.0041003	0.00133991	-0.00573892
237.2	0.00437984	0.00154657	-0.00610231
237.4	0.00425192	0.00101553	-0.00653859
237.6	0.00389648	0.00079384	-0.00678966
237.8	0.00378035	0.00042536	-0.00726687
238	0.00429148	0.00096405	-0.00705256
238.2	0.00433281	0.0008293	-0.00702295
238.4	0.00463791	0.00086368	-0.00662889
238.6	0.00423959	0.00050045	-0.00702625
238.8	0.00408162	0.00054401	-0.0072718
239	0.00417369	0.00023902	-0.00710752
239.2	0.00406761	0.00014702	-0.0067928
239.4	0.00415509	-7.67e-05	-0.0065884
239.6	0.0045677	-7.314e-05	-0.00616299
239.8	0.00404849	-0.00117157	-0.00651698
240	0.00413579	-0.00086119	-0.00649598
240.2	0.00396875	-0.0008073	-0.00646641
240.4	0.00413878	-0.00073653	-0.00578293
240.6	0.0041448	-0.00061306	-0.00542775
240.8	0.00410452	-0.00093841	-0.00556068
241	0.00474715	-0.00068498	-0.00536333
241.2	0.00486199	-0.00081	-0.00555733
241.4	0.00479329	-0.00138951	-0.00588116
241.6	0.00448332	-0.00141561	-0.00630683
241.8	0.00494307	-0.00117475	-0.00627069
242	0.00464696	-0.00058926	-0.00595628
242.2	0.00465199	-0.00070521	-0.00596151
242.4	0.00471008	-5.104e-05	-0.00535895
242.6	0.00491246	0.00035786	-0.00537935
242.8	0.00556072	0.00066691	-0.00522419
243	0.0056601	0.00114597	-0.00445302
243.2	0.00540162	0.00160722	-0.00470138
243.4	0.00515663	0.00158102	-0.00489875
243.6	0.00517562	0.00163343	-0.00499736
243.8	0.00491509	0.00112553	-0.00574539
244	0.00480035	0.00119016	-0.00601104
244.2	0.00456011	0.00100872	-0.00635193
244.4	0.00507303	0.00060998	-0.00603949
244.6	0.00500963	0.00051058	-0.00600358
244.8	0.00497423	-8.604e-05	-0.00652345
245	0.00506756	-0.00021919	-0.00667081
245.2	0.00480643	-0.00056459	-0.00666982
245.4	0.00481167	-0.00062777	-0.00683068
245.6	0.00463164	-0.00066306	-0.00667813
245.8	0.00544699	-0.00039477	-0.00571399
246	0.00547232	-0.00023564	-0.00506026
246.2	0.00563735	2.72e-06	-0.00463738
246.4	0.00559921	0.00040302	-0.00456231
246.6	0.00599885	0.00047046	-0.00455442
246.8	0.00659262	0.00066093	-0.00405665
247	0.00650867	0.00123833	-0.00381102
247.2	0.00642664	0.00138599	-0.00445185
247.4	0.00689012	0.00144886	-0.00436163
247.6	0.00718643	0.00159389	-0.00408512
247.8	0.00733702	0.00110152	-0.00447978
248	0.0075165	0.00154758	-0.00457482
248.2	0.00821718	0.00223055	-0.00398332
248.4	0.00840258	0.00225083	-0.00339587
248.6	0.00882102	0.00225893	-0.00344756
248.8	0.00922067	0.00262173	-0.00343776
249	0.00994137	0.00230825	-0.00309359
249.2	0.0101924	0.00210521	-0.00301119
249.4	0.0104999	0.00195507	-0.0031146
249.6	0.0110482	0.00147235	-0.0026886
249.8	0.0112336	0.00154074	-0.00250214
250	0.0101928	0.00100678	-0.00302375
250.2	0.00939458	0.00051072	-0.00432332
250.4	0.00894164	0.00014997	-0.0046534
250.6	0.00859278	-0.00021093	-0.00470132
250.8	0.00836255	-0.00012297	-0.00460761
251	0.00828421	-0.00041069	-0.0052691
251.2	0.00831753	-0.00058977	-0.00585147
251.4	0.0083933	-0.00025788	-0.00571541
251.6	0.00816524	-2.795e-05	-0.00574708
251.8	0.00809856	1.853e-05	-0.00615119
252	0.00789282	0.00041752	-0.00603646
252.2	0.00784783	0.00032085	-0.00535284
252.4	0.00798774	0.00046101	-0.00517732
252.6	0.00859576	0.00057749	-0.00479958
252.8	0.009007	0.00099056	-0.00455816
253	0.0097336	0.00135865	-0.00405661
253.2	0.0100019	0.00140722	-0.00427217
253.4	0.0101328	0.00155492	-0.00394528
253.6	0.0102453	0.00198356	-0.00400959
253.8	0.0105831	0.00212483	-0.00425112
254	0.0106097	0.00167573	-0.00440316
254.2	0.011038	0.00134997	-0.00455895
254.4	0.0114424	0.00121712	-0.00421073
254.6	0.0119427	0.00153684	-0.00419478
254.8	0.0125186	0.00128117	-0.00445259
255	0.0124741	0.00073636	-0.00559684
255.2	0.0120882	0.00091879	-0.00566671
255.4	0.0120594	0.00081782	-0.00605292
255.6	0.0117248	0.0006294	-0.00627952
255.8	0.0112795	0.00043199	-0.00617878
256	0.0109131	0.0003465	-0.00596115
256.2	0.0108313	0.00039895	-0.00570906
256.4	0.0106573	0.00059814	-0.00526976
256.6	0.010804	0.00122527	-0.00462273
256.8	0.0105522	0.00135077	-0.00454115
257	0.0108877	0.00213294	-0.00416991
257.2	0.0109107	0.00208925	-0.0042926
257.4	0.0107865	0.0025447	-0.00425012
257.6	0.0111906	0.00310331	-0.00438754
257.8	0.0119028	0.00311649	-0.00390924
258	0.0124944	0.00376394	-0.00304184
258.2	0.0125543	0.00367292	-0.00313716
258.4	0.0123318	0.00373292	-0.00366576
258.6	0.0125905	0.00409092	-0.00394892
258.8	0.0117507	0.00309852	-0.00500963
259	0.010684	0.00233914	-0.00592263
259.2	0.0107131	0.00227866	-0.00542417
259.4	0.0109822	0.00210183	-0.00554444
259.6	0.0109156	0.00213333	-0.0056185
259.8	0.0106778	0.0015494	-0.00581655
260	0.0107607	0.00134226	-0.00612328
260.2	0.0111501	0.0011849	-0.00585977
260.4	0.0114849	0.00102403	-0.00563836
260.6	0.0120208	0.00141126	-0.00508381
260.8	0.0115125	0.00107728	-0.00524008
261	0.0119271	0.00134004	-0.00492375
261.2	0.0123916	0.00149226	-0.00463159
261.4	0.0125121	0.00162849	-0.00422041
261.6	0.0131344	0.00237258	-0.00425207
261.8	0.0135317	0.00293897	-0.00412689
262	0.0141325	0.00370208	-0.00366172
262.2	0.0136925	0.00323275	-0.0043628
262.4	0.0137617	0.00345239	-0.00468553
262.6	0.013584	0.00370156	-0.00477682
262.8	0.0130009	0.00318564	-0.00555669
263	0.013087	0.00309152	-0.00568589
263.2	0.0135388	0.00353703	-0.00516746
263.4	0.0134394	0.00368573	-0.00552113
263.6	0.0131155	0.00340926	-0.00649502
263.8	0.0127781	0.00346241	-0.00605179
264	0.012747	0.00384069	-0.00572313
264.2	0.0128704	0.00399604	-0.00522929
264.4	0.0126809	0.00362353	-0.00538507
264.6	0.0125362	0.00349815	-0.00513972
264.8	0.0123187	0.0030101	-0.0051148
265	0.0128238	0.00278375	-0.00460722
265.2	0.0133265	0.00284227	-0.00468935
265.4	0.0135488	0.00246723	-0.00479539
265.6	0.0141094	0.00241964	-0.00482533
265.8	0.0140903	0.00207823	-0.00483686
266	0.0143761	0.00230202	-0.0044636
266.2	0.0142289	0.00178754	-0.0048357
266.4	0.0147389	0.00201905	-0.0044806
266.6	0.0146961	0.00206604	-0.00439909
266.8	0.0154313	0.00235137	-0.00440263
267	0.0156572	0.0025204	-0.00406615
267.2	0.0158541	0.00319417	-0.00375711
267.4	0.0156875	0.0034998	-0.00433185
267.6	0.0151456	0.00334272	-0.0044891
267.8	0.0150932	0.00344689	-0.00379177
268	0.0155292	0.00365642	-0.00380212
268.2	0.0155129	0.00328756	-0.00424588
268.4	0.0156782	0.00296445	-0.00446093
268.6	0.0160535	0.00319757	-0.00421469
268.8	0.0165269	0.00300809	-0.00387339
269	0.0166089	0.00268815	-0.00405274
269.2	0.0161468	0.00213865	-0.00443651
269.4	0.0160786	0.00167342	-0.00452356
269.6	0.0154208	0.00129102	-0.00488824
269.8	0.0151158	0.00150827	-0.00531389
270	0.0155685	0.00213718	-0.00490995
270.2	0.015561	0.00221428	-0.00500034
270.4	0.0162233	0.00269887	-0.00483851
270.6	0.0160272	0.00282854	-0.00508038
270.8	0.0166756	0.00338864	-0.00455332
271	0.0165487	0.00368902	-0.00487448
271.2	0.0169957	0.00409393	-0.00466762
271.4	0.0167595	0.00391337	-0.00497223
271.6	0.0165171	0.00339985	-0.00524337
271.8	0.0168476	0.00336171	-0.00549542
272	0.0173518	0.00366273	-0.00516001
272.2	0.0171728	0.00371715	-0.00513313
272.4	0.0175713	0.0036394	-0.00486303
272.6	0.017464	0.00362483	-0.00459
272.8	0.0175283	0.00296492	-0.00473803
273	0.0176066	0.00285361	-0.00453117
273.2	0.0174031	0.00240273	-0.00446602
273.4	0.0174647	0.00248639	-0.00441332
273.6	0.0172348	0.00254701	-0.00457045
273.8	0.0180327	0.00328106	-0.00395672
274	0.0182934	0.0036853	-0.00353944
274.2	0.0178806	0.00369776	-0.00381285
274.4	0.0180012	0.00384152	-0.00398916
274.6	0.01758	0.00364503	-0.00404045
274.8	0.0177391	0.00376786	-0.00375955
275	0.0175377	0.00391438	-0.00428295
275.2	0.0172944	0.00375147	-0.00430102
275.4	0.0168514	0.0038613	-0.00462394
275.6	0.0162652	0.00340828	-0.00506292
275.8	0.0161998	0.00349424	-0.00487668
276	0.0157882	0.00349717	-0.00488976
276.2	0.015508	0.00353387	-0.00502878
276.4	0.0157457	0.00296154	-0.00489556
276.6	0.0154693	0.00244534	-0.00512089
276.8	0.0160312	0.00239655	-0.00497731
277	0.0163783	0.0028722	-0.00437592
277.2	0.0166763	0.00318949	-0.00375229
277.4	0.0173678	0.00399026	-0.00335393
277.6	0.0177114	0.00418867	-0.00327404
277.8	0.0182816	0.00435176	-0.00311935
278	0.0181849	0.00424252	-0.00299767
278.2	0.0182042	0.00468561	-0.00323974
278.4	0.0189699	0.00511491	-0.00331589
278.6	0.0196162	0.00487128	-0.00306341
278.8	0.0199005	0.00533385	-0.00282997
279	0.0198433	0.00539906	-0.00306103
279.2	0.0200867	0.00553825	-0.00311468
279.4	0.020437	0.00544092	-0.00297181
279.6	0.0201099	0.00518136	-0.00309607
279.8	0.0198976	0.00545584	-0.00326431
280	0.0196078	0.00549366	-0.00396033
280.2	0.0196789	0.00533054	-0.00402506
280.4	0.0193222	0.00472598	-0.00440326
280.6	0.0190066	0.00434517	-0.00478716
280.8	0.0188552	0.00468164	-0.00454013
281	0.0190107	0.00532725	-0.00426262
281.2	0.0195052	0.00593828	-0.00362039
281.4	0.0193905	0.00585818	-0.00388688
281.6	0.0188643	0.00552904	-0.0043545
281.8	0.0191529	0.00560222	-0.00419061
282	0.0195862	0.00595934	-0.00385803
282.2	0.01979	0.00657778	-0.00383368
282.4	0.0201696	0.00633182	-0.00369144
282.6	0.0200393	0.00585932	-0.00336936
282.8	0.0201557	0.00652425	-0.00325033
283	0.0205495	0.0068741	-0.0031111
283.2	0.0209226	0.0066758	-0.00321767
283.4	0.0209446	0.00618624	-0.00313632
283.6	0.0208051	0.0066035	-0.0030559
283.8	0.0203017	0.00673177	-0.0033608
284	0.0206124	0.00648336	-0.00323269
284.2	0.0200817	0.00555202	-0.0032861
284.4	0.020254	0.00537865	-0.00338607
284.6	0.0202244	0.00540896	-0.00356936
284.8	0.0198403	0.0053852	-0.00343976
285	0.0200067	0.00520451	-0.00339481
285.2	0.0200784	0.00518471	-0.00315888
285.4	0.0198102	0.00444809	-0.00343572
285.6	0.0198253	0.00433073	-0.0036751
285.8	0.0200132	0.00432646	-0.00347979
286	0.020088	0.00431247	-0.00309558
286.2	0.0198089	0.0040472	-0.00314299
286.4	0.0199324	0.00369388	-0.00320324
286.6	0.0200029	0.00361237	-0.00308109
286.8	0.0203178	0.00408695	-0.00281198
287	0.0205719	0.00443418	-0.00231455
287.2	0.0207384	0.00413554	-0.00233322
287.4	0.0211086	0.00491783	-0.00181904
287.6	0.0212979	0.00574125	-0.00148444
287.8	0.0213256	0.00627041	-0.00101767
288	0.021907	0.006681	-0.00065586
288.2	0.0215587	0.00651369	-0.00112363
288.4	0.0221528	0.00707987	-0.00174082
288.6	0.0215606	0.00704382	-0.00235843
288.8	0.0215997	0.00664736	-0.00253085
289	0.0220553	0.00655029	-0.00283355
289.2	0.0224389	0.0069074	-0.00261486
289.4	0.0220868	0.00626211	-0.00312052
289.6	0.0214673	0.0059193	-0.00393206
289.8	0.0212844	0.00612702	-0.00399093
290	0.0215324	0.00585816	-0.00388912
290.2	0.0217337	0.00579288	-0.00430936
290.4	0.0220275	0.00570967	-0.00441504
290.6	0.0220077	0.00550036	-0.00425433
290.8	0.0225279	0.00566064	-0.00351583
291	0.023082	0.00599132	-0.00277355
291.2	0.0231577	0.00612148	-0.00277398
291.4	0.0237113	0.00665876	-0.00249355
291.6	0.0239443	0.00690314	-0.0021671
291.8	0.0242114	0.00713579	-0.00202185
292	0.0245189	0.00707905	-0.00186539
292.2	0.0243784	0.00664947	-0.00221348
292.4	0.024734	0.00649233	-0.00238938
292.6	0.0246529	0.0062432	-0.00218869
292.8	0.0253331	0.00620782	-0.00154104
293	0.0253582	0.00602328	-0.00141785
293.2	0.0249471	0.00589339	-0.0013081
293.4	0.0240752	0.00514987	-0.00174602
293.6	0.0238286	0.00528279	-0.00154438
293.8	0.0239907	0.00596667	-0.00100592
294	0.0235973	0.00543249	-0.0014695
294.2	0.0229613	0.0055728	-0.00173142
294.4	0.0228972	0.00559464	-0.00156624
294.6	0.0228505	0.00527099	-0.00117515
294.8	0.0227631	0.00518114	-0.0010033
295	0.0225075	0.00517218	-0.00121513
295.2	0.0223782	0.00506316	-0.00177319
295.4	0.0230178	0.00510155	-0.00172162
295.6	0.0228612	0.00498059	-0.00186069
295.8	0.0227576	0.00469046	-0.00243043
296	0.0229406	0.0050535	-0.00221893
296.2	0.0234688	0.00503866	-0.00241271
296.4	0.0235098	0.00483034	-0.00226431
296.6	0.0239659	0.00476859	-0.00217508
296.8	0.0242526	0.00506196	-0.00183207
297	0.0242087	0.00507868	-0.00209423
297.2	0.0240351	0.00578955	-0.00156696
297.4	0.0241831	0.00601879	-0.00119328
297.6	0.0242352	0.00657699	-0.00105792
297.8	0.0237009	0.00694925	-0.00159959
298	0.0234383	0.00685681	-0.00191825
298.2	0.0228849	0.00675635	-0.0021289
298.4	0.0231263	0.00703177	-0.00224013
298.6	0.023012	0.00660656	-0.00258554
298.8	0.0226019	0.00655703	-0.00299528
299	0.0223736	0.00630838	-0.00350362
299.2	0.0224918	0.00605521	-0.00366651
299.4	0.0228124	0.0058481	-0.00397695
299.6	0.0226256	0.00573227	-0.0040305
299.8	0.0224848	0.00570333	-0.00433781
300	0.0228658	0.00572499	-0.00426121
300.2	0.0230324	0.00508413	-0.0042483
300.4	0.0228343	0.00451843	-0.00375301
300.6	0.0233871	0.00464548	-0.00301752
300.8	0.0237335	0.00512557	-0.00232188
301	0.0244098	0.00575608	-0.00187217
301.2	0.0239499	0.00579065	-0.00173194
301.4	0.0240899	0.00574269	-0.00170443
301.6	0.0245357	0.00561854	-0.00216021
301.8	0.0250792	0.00588814	-0.00200726
302	0.0250543	0.00596	-0.00176556
302.2	0.0243501	0.00575338	-0.00219896
302.4	0.0243845	0.00561812	-0.00249648
302.6	0.0245049	0.00550388	-0.00222108
302.8	0.0243096	0.00593636	-0.00197108
303	0.0242405	0.00595065	-0.00194237
303.2	0.0243062	0.00597376	-0.00172176
303.4	0.0243826	0.00585106	-0.00178321
303.6	0.0238675	0.00590992	-0.00160589
303.8	0.0238308	0.0057245	-0.00196691
304	0.0239456	0.00567374	-0.00201092
304.2	0.0233513	0.00531809	-0.00214672
304.4	0.0231939	0.00519788	-0.00176341
304.6	0.0230927	0.00559762	-0.00158148
304.8	0.023578	0.00640675	-0.00152591
305	0.0235953	0.00659646	-0.00184867
305.2	0.0228502	0.00605917	-0.00223533
305.4	0.0229325	0.00615274	-0.00257223
305.6	0.0237426	0.00575242	-0.00285228
305.8	0.0238174	0.00642316	-0.00209171
306	0.0233403	0.00622335	-0.00227248
306.2	0.0235271	0.00613773	-0.00189413
306.4	0.0241613	0.00574081	-0.00213166
306.6	0.0253415	0.00632066	-0.00137845
306.8	0.0260321	0.00642289	-0.00129002
307	0.0262897	0.00601604	-0.00157987
307.2	0.0268927	0.00623437	-0.00165241
307.4	0.0272897	0.00660108	-0.00171455
307.6	0.027751	0.00715192	-0.00202815
307.8	0.0277992	0.00689452	-0.0026961
308	0.0276892	0.00687423	-0.00304436
308.2	0.0269563	0.00643618	-0.00352435
308.4	0.0269181	0.00623593	-0.00350025
308.6	0.0268497	0.00648302	-0.00350734
308.8	0.0268554	0.00658888	-0.0033468
309	0.0259575	0.00636199	-0.00400822
309.2	0.0251518	0.00575804	-0.00469801
309.4	0.0252473	0.0059024	-0.00464027
309.6	0.0253175	0.00591065	-0.00418763
309.8	0.0248563	0.00621526	-0.00378189
310	0.0247953	0.00605287	-0.00372978
310.2	0.0248449	0.00621934	-0.00325063
310.4	0.0251898	0.00605589	-0.00311041
310.6	0.0258614	0.0064279	-0.00242356
310.8	0.0260682	0.0065717	-0.00241689
311	0.0260894	0.00690214	-0.00273891
311.2	0.0269089	0.00778745	-0.00188242
311.4	0.0271352	0.00798308	-0.00192894
311.6	0.0276811	0.00776778	-0.0017564
311.8	0.0277977	0.00752608	-0.00175015
312	0.0280459	0.00731607	-0.00152159
312.2	0.027595	0.006974	-0.00216001
312.4	0.0282568	0.00717884	-0.00193404
312.6	0.0283754	0.00739411	-0.00212786
312.8	0.0281542	0.00701939	-0.0025868
313	0.028355	0.00698747	-0.003091
313.2	0.0284874	0.00657767	-0.00291046
313.4	0.0287835	0.00679031	-0.00251603
313.6	0.0283657	0.00687953	-0.00275004
313.8	0.0282964	0.00640819	-0.00314751
314	0.0286498	0.00646185	-0.00303375
314.2	0.0284259	0.00664864	-0.00336887
314.4	0.0282082	0.00655469	-0.00343048
314.6	0.0284191	0.00670112	-0.00377713
314.8	0.028675	0.00678587	-0.00368776
315	0.0290736	0.00686658	-0.00359295
315.2	0.0291679	0.00676432	-0.00303855
315.4	0.0291558	0.00679143	-0.0032563
315.6	0.0293495	0.00706528	-0.00265019
315.8	0.0292731	0.00760668	-0.00280622
316	0.0290905	0.00753934	-0.00243805
316.2	0.0292636	0.00805815	-0.00233781
316.4	0.0297302	0.00860696	-0.00167727
316.6	0.0291261	0.00849454	-0.00202339
316.8	0.0288463	0.00839737	-0.00226883
317	0.0288701	0.00829333	-0.00210406
317.2	0.0285779	0.00784181	-0.00206693
317.4	0.0284315	0.00773056	-0.00243234
317.6	0.028159	0.00751187	-0.00261378
317.8	0.0286977	0.00740962	-0.00230141
318	0.0288677	0.00783623	-0.00234002
318.2	0.0286381	0.00766719	-0.00292413
318.4	0.0286379	0.00740472	-0.00304205
318.6	0.0291986	0.00765848	-0.00286707
318.8	0.0296077	0.00790143	-0.00236225
319	0.0300107	0.00793737	-0.00206818
319.2	0.0295925	0.00759764	-0.00210369
319.4	0.0299933	0.00770198	-0.00213302
319.6	0.0300358	0.00783832	-0.00192147
319.8	0.0302764	0.00844736	-0.00139134
320	0.03049	0.00850345	-0.00080862
320.2	0.0307787	0.00892375	-0.0007069
320.4	0.0305713	0.00921349	-0.00061886
320.6	0.0300735	0.0091127	-0.00079686
320.8	0.0299772	0.00893579	-0.00088836
321	0.0295561	0.00835555	-0.00101287
321.2	0.028987	0.00762592	-0.00135729
321.4	0.0284346	0.00752486	-0.00164991
321.6	0.0285519	0.00770666	-0.00116192
321.8	0.0293035	0.00836744	-0.00112698
322	0.02911	0.00799899	-0.00175627
322.2	0.0291569	0.00743427	-0.00236545
322.4	0.0293208	0.00736447	-0.00269407
322.6	0.0292346	0.00690387	-0.00295727
322.8	0.0293639	0.00653876	-0.00292213
323	0.0291916	0.00599851	-0.00325222
323.2	0.0291164	0.00579091	-0.00347544
323.4	0.0294461	0.00595467	-0.00398319
323.6	0.0294168	0.00587043	-0.00402268
323.8	0.0300249	0.00653394	-0.00368874
324	0.0303561	0.00650632	-0.00376474
324.2	0.0301686	0.00661486	-0.00358281
324.4	0.0298972	0.00661676	-0.00342901
324.6	0.0297606	0.00665767	-0.00343021
324.8	0.0297248	0.00669038	-0.00331887
325	0.0299906	0.00725116	-0.00286184
325.2	0.030297	0.00730354	-0.00269129
325.4	0.0306733	0.00769378	-0.00234577
325.6	0.0308718	0.0082198	-0.00184861
325.8	0.0307413	0.00782128	-0.00247069
326	0.0303625	0.00738791	-0.00241871
326.2	0.0306023	0.00718855	-0.00235188
326.4	0.0304171	0.0068672	-0.00233082
326.6	0.030565	0.0070177	-0.0021312
326.8	0.0304679	0.00710257	-0.00212673
327	0.0302836	0.00701753	-0.00207042
327.2	0.0307119	0.00711614	-0.00180435
327.4	0.0304442	0.00664069	-0.00235405
327.6	0.0305171	0.00636153	-0.00251106
327.8	0.0306283	0.00634739	-0.00292594
328	0.0301922	0.00644928	-0.00263721
328.2	0.0292672	0.00622246	-0.00308123
328.4	0.0293756	0.00648867	-0.00282193
328.6	0.0298631	0.00698222	-0.0025898
328.8	0.0303995	0.00717145	-0.00256652
329	0.0311954	0.00729556	-0.00208049
329.2	0.0308269	0.007421	-0.0024281
329.4	0.0307714	0.0073774	-0.00259453
329.6	0.0305918	0.00755882	-0.00230886
329.8	0.0310132	0.00739792	-0.0021269
330	0.0314763	0.00806685	-0.00176011
330.2	0.0313818	0.0078323	-0.00179844
330.4	0.0314463	0.00807333	-0.00188677
330.6	0.0316132	0.00850262	-0.00201342
330.8	0.0315404	0.00845617	-0.00210428
331	0.031518	0.00815811	-0.00176338
331.2	0.0319414	0.0082509	-0.00214812
331.4	0.0319515	0.0081425	-0.00242918
331.6	0.0315358	0.00769338	-0.00285331
331.8	0.0314837	0.00746657	-0.00282523
332	0.0317392	0.00823905	-0.00266123
332.2	0.0315334	0.00767543	-0.00310272
332.4	0.0318674	0.00773195	-0.00282054
332.6	0.0325606	0.00751049	-0.0026425
332.8	0.0330157	0.0075371	-0.00253703
333	0.0327231	0.00744219	-0.00270622
333.2	0.0321911	0.00737528	-0.00283308
333.4	0.0324475	0.00693155	-0.00252158
333.6	0.0325117	0.00714041	-0.00191252
333.8	0.0323339	0.00700017	-0.00230298
334	0.031902	0.00728441	-0.00249453
334.2	0.0313588	0.00694798	-0.00249668
334.4	0.0314192	0.00734596	-0.00274311
334.6	0.0308818	0.00729475	-0.00301263
334.8	0.0310962	0.00754722	-0.00262557
335	0.031155	0.00789754	-0.00272168
335.2	0.0308411	0.00798105	-0.00298124
335.4	0.0311865	0.00849035	-0.00277653
335.6	0.0309472	0.00847063	-0.00284979
335.8	0.0310524	0.00851016	-0.00314124
336	0.0316109	0.00924712	-0.00317083
336.2	0.0316345	0.00889996	-0.00303303
336.4	0.0322021	0.0093483	-0.00291088
336.6	0.0330722	0.00982404	-0.00208279
336.8	0.033406	0.00996739	-0.00205616
337	0.0336607	0.00985431	-0.00192305
337.2	0.0341608	0.00974249	-0.00121118
337.4	0.0342739	0.00992469	-0.00088151
337.6	0.0348165	0.0101635	-0.00056424
337.8	0.0349386	0.00982148	-0.00083739
338	0.0351331	0.00965763	-0.00078605
338.2	0.0350131	0.00918369	-0.00080215
338.4	0.0355453	0.00938081	-0.00083263
338.6	0.0355155	0.00920828	-0.00073395
338.8	0.0363183	0.00956548	3.322e-05
339	0.0359779	0.00926623	-0.00070215
339.2	0.0352678	0.00845999	-0.00083553
339.4	0.0353009	0.00844806	-0.00117764
339.6	0.0342639	0.00760577	-0.0017021
339.8	0.0336909	0.0069771	-0.00252877
340	0.0340082	0.00744211	-0.00225138
340.2	0.0338486	0.00736974	-0.00242418
340.4	0.0337327	0.00751355	-0.0026303
340.6	0.0336341	0.0072893	-0.00247961
340.8	0.0335879	0.00678127	-0.00273585
341	0.0330934	0.00705231	-0.00269265
341.2	0.0328337	0.00707507	-0.00286087
341.4	0.0322891	0.00700757	-0.00291737
341.6	0.0323272	0.006855	-0.00321126
341.8	0.0322443	0.00681925	-0.00314465
342	0.0322105	0.00692399	-0.00275773
342.2	0.0324535	0.00736992	-0.00251198
342.4	0.032641	0.00754986	-0.00274724
342.6	0.0326503	0.00757632	-0.00266216
342.8	0.0335877	0.00789117	-0.00186405
343	0.0335823	0.00720991	-0.00214604
343.2	0.0337434	0.00705782	-0.00169042
343.4	0.0338273	0.00745114	-0.00146342
343.6	0.0341043	0.00742606	-0.00138636
343.8	0.0341605	0.00716201	-0.00141727
344	0.0345583	0.00737051	-0.00130477
344.2	0.0350702	0.00755674	-0.00104778
344.4	0.0350512	0.00744125	-0.00132873
344.6	0.0349941	0.00733031	-0.00145607
344.8	0.0350792	0.00707788	-0.00149961
345	0.0347202	0.00762899	-0.00140981
345.2	0.0352583	0.00759573	-0.00139448
345.4	0.0352333	0.00784171	-0.00132566
345.6	0.035173	0.00806205	-0.00132652
345.8	0.0352717	0.00850782	-0.00095717
346	0.0350775	0.00854979	-0.00072355
346.2	0.0353837	0.00893972	-0.00062851
346.4	0.0353427	0.00943687	8.659e-05
346.6	0.0357474	0.0102191	0.00063974
346.8	0.0363609	0.0101122	0.00073113
347	0.0363684	0.0100123	0.00054299
347.2	0.0361251	0.0102463	0.0005135
347.4	0.0362415	0.010305	0.00012546
347.6	0.0362282	0.00995831	-0.00063891
347.8	0.0360912	0.00937039	-0.00076917
348	0.0367869	0.00992464	-0.00095696
348.2	0.0367391	0.0100927	-0.00054997
348.4	0.036329	0.0101933	-0.00137582
348.6	0.0363259	0.00999751	-0.00191436
348.8	0.0360651	0.00951241	-0.0020013
349	0.0358615	0.0100449	-0.00206496
349.2	0.0361279	0.0097279	-0.00201875
349.4	0.0355541	0.00980063	-0.00240311
349.6	0.0346816	0.00949628	-0.00240111
349.8	0.0347953	0.00981962	-0.00180424
350	0.0342918	0.00903442	-0.00150202
350.2	0.0347653	0.00906665	-0.00079269
350.4	0.0345569	0.00927407	-0.00019713
350.6	0.0348381	0.00887209	-0.00051455
350.8	0.0354524	0.00814941	-0.00067277
351	0.0355967	0.00804172	-0.00076631
351.2	0.0355473	0.00751478	-0.00123087
351.4	0.0358084	0.00728129	-0.00180522
351.6	0.0359129	0.00748699	-0.00168138
351.8	0.0362746	0.00745743	-0.0015583
352	0.0369574	0.00806445	-0.00159711
352.2	0.0367732	0.00815239	-0.00191868
352.4	0.0366099	0.00813117	-0.00234686
352.6	0.0360162	0.00773329	-0.00258137
352.8	0.0356753	0.0080448	-0.00233677
353	0.0357637	0.00848207	-0.00254581
353.2	0.0357976	0.00837022	-0.00263224
353.4	0.0350259	0.00817632	-0.00308048
353.6	0.0347946	0.00777201	-0.002469
353.8	0.0346726	0.00731444	-0.00253136
354	0.033977	0.00665583	-0.00266329
354.2	0.0347237	0.00751728	-0.00165185
354.4	0.034611	0.00724221	-0.001047
354.6	0.0353215	0.00716029	-0.00051899
354.8	0.0358975	0.00764237	1.474e-05
355	0.0359668	0.00773885	0.00033192
355.2	0.0361001	0.00740621	0.00058033
355.4	0.0363182	0.00770894	0.0007139
355.6	0.0363504	0.00784514	0.00068711
355.8	0.0364264	0.00813124	0.00074805
[truncated: 3,395 more rows]

## Sheet: C104-P34
Time1	2E-06	5E-07	1.25E-07
[truncated: 4,000 more rows]

[truncated: 29 more sheets: C104-P37, C104-P104, C104-PCH11, C104-PCH15, C104-PCH17, C34-P34, C34-P37, C34-P104, C34-PCH11, C34-PCH15, C34-PCH17, C37-P34, C37-P37, C37-P104, C37-PCH11, C37-PCH15, C37-PCH17, CH15-P34, CH15-P37, CH15-P104 …]
