# Supplementary material for: Design of amyloidogenic peptide traps
Source: Nat Chem Biol. 2024 Mar 19;20(8):981–90. doi: 10.1038/s41589-024-01578-5 (PMC11288891; doi:10.1038/s41589-024-01578-5)
Supplement: Supplementary file 13 — Statistical source data. [file 41589_2024_1578_MOESM13_ESM.xlsx]

## Sheet: Extended Data Fig. 3d
C34.1	uv 230	vol 230
0	0	8.00353
1	1.35071e-07	8.01016
2	7.96486e-07	8.01681
3	1.10245e-06	8.02341
4	5.72097e-06	8.03005
5	7.39582e-06	8.03228
6	7.96707e-06	8.03465
7	1.05829e-05	8.03861
8	1.1185e-05	8.04452
9	1.2193e-05	8.05116
10	1.43375e-05	8.0578
11	1.85142e-05	8.06444
12	2.15728e-05	8.07107
13	2.43572e-05	8.07771
14	2.59628e-05	8.08435
15	2.98858e-05	8.09098
16	3.28074e-05	8.09785
17	3.18853e-05	8.10448
18	3.23049e-05	8.11112
19	3.12543e-05	8.11776
20	2.97201e-05	8.1244
21	2.80391e-05	8.13106
22	2.77786e-05	8.1377
23	2.93887e-05	8.14433
24	2.82132e-05	8.15121
25	2.09744e-05	8.15784
26	2.4247e-05	8.16448
27	2.80487e-05	8.17113
28	3.1006e-05	8.17775
29	3.45136e-05	8.18439
30	4.25242e-05	8.19103
31	5.08926e-05	8.19767
32	5.78005e-05	8.20453
33	6.46401e-05	8.21116
34	7.12093e-05	8.2178
35	8.33127e-05	8.22444
36	8.87001e-05	8.23108
37	9.5962e-05	8.2377
38	0.000104098	8.24434
39	0.000112018	8.25098
40	0.000114663	8.25785
41	0.000116012	8.26448
42	0.000118484	8.27112
43	0.000119388	8.27777
44	0.000121409	8.2844
45	0.000125129	8.29103
46	0.000127158	8.29768
47	0.000126276	8.30431
48	0.000125936	8.31117
49	0.000126769	8.31781
50	0.00012867	8.32444
51	0.000130701	8.33108
52	0.000131093	8.33772
53	0.000130362	8.34436
54	0.000134112	8.35099
55	0.000135775	8.35763
56	0.000137754	8.3645
57	0.000143731	8.37114
58	0.000149838	8.37778
59	0.000155562	8.38442
60	0.000160417	8.39105
61	0.000163382	8.39769
62	0.000170239	8.40433
63	0.000177846	8.41096
64	0.000179954	8.41783
65	0.000185001	8.42446
66	0.000188636	8.4311
67	0.000188972	8.43774
68	0.000187519	8.44438
69	0.000184515	8.45102
70	0.000183786	8.45765
71	0.0001896	8.46429
72	0.000187638	8.47116
73	0.000186698	8.4778
74	0.000187402	8.48444
75	0.000184256	8.49107
76	0.000184548	8.49771
77	0.000184151	8.50434
78	0.000184076	8.51099
79	0.000189089	8.51762
80	0.000191666	8.52449
81	0.000189827	8.53112
82	0.000193779	8.53776
83	0.000197913	8.5444
84	0.000201067	8.55104
85	0.000205616	8.55767
86	0.000207126	8.56431
87	0.000209762	8.57094
88	0.000213366	8.57782
89	0.000213432	8.58446
90	0.000215714	8.59109
91	0.000216481	8.59773
92	0.000215785	8.60437
93	0.000212753	8.611
94	0.000213771	8.61764
95	0.000217483	8.62428
96	0.000221942	8.63114
97	0.000222749	8.63778
98	0.000222586	8.64442
99	0.000220732	8.65106
100	0.000214495	8.65769
101	0.000218164	8.66434
102	0.000222384	8.67098
103	0.000226051	8.67761
104	0.000228284	8.68449
105	0.000229244	8.69112
106	0.000228492	8.69777
107	0.000228655	8.7044
108	0.000235283	8.71104
109	0.0002421	8.71767
110	0.000248725	8.72431
111	0.000245277	8.73095
112	0.000241353	8.73782
113	0.000237902	8.74445
114	0.000231744	8.75108
115	0.000229078	8.75772
116	0.000227379	8.76436
117	0.000228713	8.77098
118	0.00022494	8.77762
119	0.000222175	8.78426
120	0.000223232	8.79113
121	0.000226612	8.79777
122	0.000227735	8.80441
123	0.000230517	8.81104
124	0.000235298	8.81768
125	0.000236938	8.82432
126	0.000233489	8.83095
127	0.000230798	8.83759
128	0.000228254	8.84446
129	0.000225508	8.85109
130	0.000223642	8.85773
131	0.000220517	8.86437
132	0.000218894	8.871
133	0.000215825	8.87766
134	0.00021388	8.88429
135	0.000210666	8.89093
136	0.000208199	8.8978
137	0.000208787	8.90444
138	0.000209026	8.91108
139	0.000209342	8.91772
140	0.000207708	8.92435
141	0.000207849	8.93098
142	0.000209404	8.93762
143	0.000209334	8.94426
144	0.000209464	8.95113
145	0.000208885	8.95776
146	0.000211344	8.9644
147	0.000210292	8.97104
148	0.000211058	8.97767
149	0.000212874	8.9843
150	0.000213888	8.99093
151	0.00021412	8.99757
152	0.000213427	9.00444
153	0.000213991	9.01108
154	0.000212	9.01772
155	0.000211818	9.02435
156	0.000212204	9.031
157	0.000210757	9.03763
158	0.000207836	9.04427
159	0.000205849	9.0509
160	0.000205246	9.05777
161	0.000203114	9.06441
162	0.000202901	9.07104
163	0.000204141	9.07768
164	0.000206097	9.08432
165	0.000208488	9.09095
166	0.000212063	9.09759
167	0.000218283	9.10423
168	0.000226646	9.1111
169	0.000230536	9.11774
170	0.000232147	9.12438
171	0.00023354	9.13101
172	0.000238458	9.13765
173	0.000240988	9.14429
174	0.000242757	9.15092
175	0.00024521	9.15756
176	0.000248036	9.16443
177	0.000251643	9.17106
178	0.000253775	9.1777
179	0.000256401	9.18434
180	0.000257605	9.19097
181	0.000260068	9.19761
182	0.000259865	9.20425
183	0.000261535	9.21088
184	0.000263482	9.21776
185	0.000262964	9.2244
186	0.000259858	9.23104
187	0.000255162	9.23767
188	0.00025078	9.24431
189	0.000251195	9.25095
190	0.000247673	9.25758
191	0.000245357	9.26422
192	0.000242638	9.27108
193	0.000241142	9.27772
194	0.000237971	9.28436
195	0.000238281	9.29099
196	0.000243988	9.29763
197	0.000249303	9.30427
198	0.000251181	9.3109
199	0.000251009	9.31754
200	0.000260714	9.32441
201	0.000265252	9.33105
202	0.00026818	9.33769
203	0.000270402	9.34433
204	0.000277492	9.35096
205	0.000282201	9.3576
206	0.000283501	9.36424
207	0.000284771	9.37087
208	0.000287905	9.37774
209	0.000289288	9.38437
210	0.000286798	9.39101
211	0.000287817	9.39765
212	0.000288806	9.40428
213	0.000293075	9.41094
214	0.000298432	9.41758
215	0.000304015	9.42421
216	0.000308906	9.43108
217	0.000313671	9.43772
218	0.000318343	9.44436
219	0.000323325	9.451
220	0.000329993	9.45763
221	0.000337198	9.46427
222	0.000341235	9.47091
223	0.000345191	9.47754
224	0.000347449	9.48441
225	0.000351229	9.49104
226	0.000352285	9.49768
227	0.000356344	9.50432
228	0.000363793	9.51095
229	0.000371606	9.51758
230	0.000378295	9.52422
231	0.000384859	9.53085
232	0.00039571	9.53772
233	0.000402389	9.54436
234	0.000406485	9.551
235	0.000408637	9.55764
236	0.000419146	9.56427
237	0.000425108	9.57092
238	0.000427428	9.57755
239	0.000431455	9.58419
240	0.000435626	9.59105
241	0.000440508	9.59769
242	0.000445656	9.60432
243	0.000452999	9.61096
244	0.000459188	9.6176
245	0.000464548	9.62425
246	0.000466864	9.63089
247	0.000474543	9.63752
248	0.000483805	9.6444
249	0.000492586	9.65104
250	0.000502203	9.65767
251	0.00051216	9.66431
252	0.000521388	9.67094
253	0.000527052	9.67758
254	0.00053728	9.68423
255	0.000550592	9.69086
256	0.000564673	9.69772
257	0.000573478	9.70435
258	0.000580154	9.71099
259	0.00058633	9.71763
260	0.000594195	9.72427
261	0.000603695	9.73089
262	0.000612995	9.73753
263	0.000623896	9.74417
264	0.000635654	9.75104
265	0.000645463	9.75768
266	0.000653409	9.76432
267	0.000664698	9.77095
268	0.000674441	9.77759
269	0.000686112	9.78423
270	0.000696987	9.79086
271	0.000700433	9.7975
272	0.000707075	9.80436
273	0.000715928	9.811
274	0.000721403	9.81764
275	0.000730575	9.82427
276	0.000739299	9.83091
277	0.000746712	9.83755
278	0.000763005	9.84419
279	0.000776372	9.85082
280	0.000788182	9.85769
281	0.000806519	9.86433
282	0.000820107	9.87097
283	0.000829481	9.87761
284	0.000836608	9.88425
285	0.000846274	9.89088
286	0.000857379	9.89752
287	0.000868778	9.90416
288	0.000872964	9.91102
289	0.000879978	9.91766
290	0.000887558	9.92429
291	0.000894181	9.93093
292	0.00090819	9.93757
293	0.000928149	9.94421
294	0.000948979	9.95084
295	0.000957854	9.95748
296	0.000970494	9.96434
297	0.000980564	9.97099
298	0.000989774	9.97763
299	0.0010052	9.98426
300	0.00101935	9.9909
301	0.00103328	9.99754
302	0.00104344	10.0042
303	0.00105453	10.0108
304	0.00106512	10.0177
305	0.00107954	10.0243
306	0.00109003	10.0309
307	0.00110607	10.0376
308	0.00112497	10.0442
309	0.00113597	10.0509
310	0.00114846	10.0575
311	0.00116414	10.0641
312	0.00117995	10.071
313	0.00119135	10.0776
314	0.00120316	10.0843
315	0.0012173	10.0909
316	0.00123113	10.0976
317	0.0012445	10.1042
318	0.00125459	10.1108
319	0.00126378	10.1175
320	0.00127566	10.1243
321	0.00128752	10.131
322	0.00129911	10.1376
323	0.00131185	10.1442
324	0.00132443	10.1509
325	0.00133587	10.1575
326	0.00134596	10.1642
327	0.00135317	10.1708
328	0.00136605	10.1777
329	0.0013799	10.1843
330	0.0013901	10.1909
331	0.00140191	10.1976
332	0.00141113	10.2042
333	0.00141923	10.2109
334	0.00142911	10.2175
335	0.00143969	10.2241
336	0.00145365	10.231
337	0.00147075	10.2376
338	0.00148725	10.2443
339	0.00150531	10.2509
340	0.00152292	10.2576
341	0.00153364	10.2642
342	0.0015475	10.2708
343	0.00156069	10.2775
344	0.00157239	10.2843
345	0.00158237	10.291
346	0.00159732	10.2976
347	0.00161075	10.3042
348	0.00162172	10.3109
349	0.001633	10.3175
350	0.00164286	10.3241
351	0.00165522	10.3308
352	0.00166928	10.3376
353	0.00168404	10.3443
354	0.00170173	10.3509
355	0.00172242	10.3576
356	0.00173557	10.3642
357	0.00174956	10.3708
358	0.00176225	10.3775
359	0.00177062	10.3841
360	0.00177908	10.391
361	0.00179475	10.3976
362	0.00181106	10.4043
363	0.00182922	10.4109
364	0.00184226	10.4175
365	0.00185468	10.4242
366	0.00186736	10.4308
367	0.00187756	10.4375
368	0.00188929	10.4443
369	0.00190456	10.451
370	0.00192377	10.4576
371	0.00193836	10.4642
372	0.00194992	10.4709
373	0.00196024	10.4775
374	0.00197256	10.4841
375	0.00199109	10.4908
376	0.00200882	10.4976
377	0.00202636	10.5043
378	0.00204688	10.5109
379	0.00206927	10.5175
380	0.00209032	10.5242
381	0.00210631	10.5308
382	0.00212224	10.5375
383	0.00213905	10.5441
384	0.002158	10.5509
385	0.00216908	10.5576
386	0.0021812	10.5642
387	0.00219556	10.5709
388	0.00220956	10.5775
389	0.00222319	10.5841
390	0.00223413	10.5908
391	0.00224585	10.5974
392	0.0022599	10.6042
393	0.00227448	10.6109
394	0.00228981	10.6176
395	0.00230729	10.6242
396	0.00232397	10.6308
397	0.00234186	10.6375
398	0.00235783	10.6441
399	0.00236965	10.6508
400	0.00238493	10.6576
401	0.00240324	10.6643
402	0.00242004	10.6709
403	0.00243641	10.6775
404	0.00245033	10.6842
405	0.00246393	10.6908
406	0.00248256	10.6974
407	0.00249521	10.7041
408	0.00250783	10.7109
409	0.002524	10.7176
410	0.00254187	10.7242
411	0.00255923	10.7309
412	0.00257561	10.7375
413	0.00259225	10.7441
414	0.00261343	10.7508
415	0.00263395	10.7574
416	0.00265002	10.7642
417	0.00267371	10.7709
418	0.00269623	10.7775
419	0.00271785	10.7842
420	0.00273902	10.7908
421	0.00276068	10.7975
422	0.00277965	10.8041
423	0.00279729	10.8107
424	0.00281669	10.8175
425	0.00283513	10.8242
426	0.00285371	10.8309
427	0.0028693	10.8375
428	0.0028887	10.8441
429	0.00290636	10.8508
430	0.00292311	10.8574
431	0.00294291	10.8641
432	0.00296218	10.8708
433	0.00298161	10.8776
434	0.00299691	10.8842
435	0.00301173	10.8908
436	0.00302733	10.8975
437	0.00304326	10.9041
438	0.00305739	10.9108
439	0.00307767	10.9174
440	0.0030988	10.9242
441	0.00311414	10.9309
442	0.00313166	10.9375
443	0.00314954	10.9442
444	0.00316775	10.9508
445	0.00319323	10.9575
446	0.00321438	10.9641
447	0.0032343	10.9707
448	0.00325582	10.9775
449	0.00327576	10.9842
450	0.00329437	10.9909
451	0.0033145	10.9975
452	0.00333604	11.0041
453	0.00335872	11.0108
454	0.00338219	11.0174
455	0.00340248	11.024
456	0.00343106	11.0308
457	0.00345752	11.0376
458	0.00348017	11.0442
459	0.00350124	11.0508
460	0.00352198	11.0575
461	0.00354304	11.0641
462	0.00356375	11.0707
463	0.00358698	11.0774
464	0.00361011	11.0841
465	0.00363216	11.0909
466	0.00365057	11.0975
467	0.00367115	11.1041
468	0.00369428	11.1108
469	0.00371798	11.1174
470	0.00374233	11.1241
471	0.00376906	11.1307
472	0.00379572	11.1375
473	0.00381765	11.1442
474	0.00384647	11.1509
475	0.00387434	11.1575
476	0.00390054	11.1641
477	0.00392569	11.1708
478	0.00395593	11.1774
479	0.00398482	11.184
480	0.00401262	11.1908
481	0.00403806	11.1975
482	0.00406528	11.2042
483	0.00409647	11.2108
484	0.00412409	11.2175
485	0.00415148	11.2241
486	0.00417756	11.2307
487	0.00420359	11.2374
488	0.00423277	11.2441
489	0.00426213	11.2509
490	0.00429209	11.2575
491	0.00432111	11.2641
492	0.00435499	11.2708
493	0.0043892	11.2774
494	0.00442067	11.2841
495	0.00445207	11.2907
496	0.00448798	11.2974
497	0.00452811	11.3042
498	0.00456319	11.3108
499	0.00459798	11.3175
500	0.00463512	11.3241
501	0.00467498	11.3307
502	0.00471103	11.3374
503	0.00474361	11.344
504	0.00477573	11.3507
505	0.00481222	11.3575
506	0.00485244	11.3642
507	0.00489088	11.3708
508	0.00492608	11.3774
509	0.00496288	11.3841
510	0.00500157	11.3907
511	0.00504041	11.3973
512	0.00507807	11.404
513	0.00511775	11.4108
514	0.00515746	11.4175
515	0.00519438	11.4241
516	0.00522724	11.4308
517	0.00526626	11.4374
518	0.00530691	11.444
519	0.00534804	11.4507
520	0.00538898	11.4574
521	0.00543333	11.4642
522	0.00547936	11.4708
523	0.00552632	11.4775
524	0.00557501	11.4841
525	0.00562418	11.4907
526	0.00567383	11.4974
527	0.00572249	11.504
528	0.00576888	11.5107
529	0.00581848	11.5175
530	0.00587085	11.5241
531	0.00591916	11.5308
532	0.00596748	11.5374
533	0.00601728	11.5441
534	0.00606897	11.5507
535	0.00612055	11.5573
536	0.00617259	11.564
537	0.00622175	11.5708
538	0.00627482	11.5775
539	0.00632661	11.5841
540	0.00637408	11.5907
541	0.00642304	11.5974
542	0.00647268	11.604
543	0.00652394	11.6107
544	0.00657515	11.6173
545	0.0066294	11.6242
546	0.00668301	11.6308
547	0.00673575	11.6374
548	0.00678743	11.6441
549	0.006844	11.6507
550	0.0069	11.6574
551	0.00695396	11.664
552	0.00700417	11.6707
553	0.00705391	11.6775
554	0.0071044	11.6841
555	0.00715626	11.6908
556	0.00720275	11.6974
557	0.00725277	11.7041
558	0.00730347	11.7107
559	0.00734767	11.7173
560	0.00739788	11.724
561	0.00745162	11.7308
562	0.00750905	11.7375
563	0.0075674	11.7441
564	0.00761911	11.7507
565	0.00766649	11.7574
566	0.00772073	11.764
567	0.00777364	11.7706
568	0.00782689	11.7773
569	0.00788103	11.7841
570	0.00792993	11.7908
571	0.00797801	11.7974
572	0.00802381	11.8041
573	0.0080651	11.8107
574	0.00812211	11.8173
575	0.00817927	11.824
576	0.00823298	11.8306
577	0.00828087	11.8375
578	0.00832752	11.8441
579	0.00837172	11.8507
580	0.00841433	11.8574
581	0.00845932	11.864
582	0.0085057	11.8707
583	0.00855369	11.8773
584	0.00859205	11.884
585	0.00863083	11.8908
586	0.0086711	11.8975
587	0.00871494	11.9041
588	0.00875885	11.9107
589	0.00880468	11.9174
590	0.00885076	11.924
591	0.0088904	11.9306
592	0.00893276	11.9373
593	0.00897597	11.9441
594	0.00901763	11.9508
595	0.00906071	11.9574
596	0.00910172	11.9641
597	0.00914268	11.9707
598	0.00918632	11.9773
599	0.00922227	11.9839
600	0.00926222	11.9906
601	0.00930643	11.9975
602	0.00934264	12.0041
603	0.00937481	12.0107
604	0.00940623	12.0174
605	0.00943866	12.024
606	0.00947257	12.0306
607	0.00950652	12.0373
608	0.00953647	12.0439
609	0.00957145	12.0508
610	0.0096058	12.0574
611	0.00963874	12.0641
612	0.00967544	12.0707
613	0.00971068	12.0773
614	0.00974794	12.084
615	0.00978138	12.0906
616	0.00981168	12.0973
617	0.00984574	12.1041
618	0.00987791	12.1108
619	0.00991088	12.1174
620	0.0099477	12.124
621	0.00998113	12.1307
622	0.010014	12.1373
623	0.0100507	12.1439
624	0.0100838	12.1506
625	0.0101212	12.1574
626	0.0101656	12.1641
627	0.0102094	12.1707
628	0.0102523	12.1774
629	0.0102923	12.184
630	0.0103227	12.1906
631	0.0103625	12.1973
632	0.0104039	12.2039
633	0.0104455	12.2108
634	0.0104885	12.2174
635	0.0105326	12.224
636	0.0105741	12.2307
637	0.0106119	12.2373
638	0.0106525	12.244
639	0.0107007	12.2506
640	0.010754	12.2572
641	0.0108023	12.2641
642	0.0108557	12.2707
643	0.0109083	12.2774
644	0.0109605	12.284
645	0.0110135	12.2906
646	0.0110656	12.2973
647	0.011118	12.3039
648	0.0111713	12.3106
649	0.0112217	12.3174
650	0.011276	12.3241
651	0.0113325	12.3307
652	0.0113858	12.3373
653	0.0114415	12.344
654	0.0115035	12.3506
655	0.0115663	12.3573
656	0.0116309	12.3639
657	0.0116972	12.3708
658	0.0117642	12.3774
659	0.0118323	12.384
660	0.0118979	12.3907
661	0.0119639	12.3973
662	0.0120292	12.404
663	0.0120944	12.4106
664	0.0121652	12.4172
665	0.0122311	12.4241
666	0.0122969	12.4307
667	0.0123738	12.4374
668	0.0124519	12.444
669	0.012531	12.4507
670	0.0126105	12.4573
671	0.0126964	12.4639
672	0.0127823	12.4706
673	0.0128691	12.4774
674	0.0129544	12.4841
675	0.0130501	12.4907
676	0.0131505	12.4973
677	0.0132433	12.504
678	0.0133438	12.5106
679	0.0134434	12.5172
680	0.0135444	12.5239
681	0.0136483	12.5307
682	0.0137634	12.5374
683	0.013882	12.544
684	0.0139957	12.5507
685	0.0141058	12.5573
686	0.0142182	12.5639
687	0.014335	12.5706
688	0.0144571	12.5772
689	0.0145866	12.5841
690	0.0147183	12.5907
691	0.0148461	12.5973
692	0.0149786	12.604
693	0.0151125	12.6106
694	0.0152513	12.6173
695	0.0153973	12.6239
696	0.0155497	12.6305
697	0.0157049	12.6374
698	0.0158573	12.644
699	0.0160186	12.6507
700	0.0161855	12.6573
701	0.016354	12.664
702	0.0165159	12.6706
703	0.0166905	12.6772
704	0.01687	12.6839
705	0.0170476	12.6907
706	0.0172269	12.6974
707	0.0174104	12.704
708	0.0175974	12.7106
709	0.0177845	12.7173
710	0.0179771	12.7239
711	0.0181787	12.7305
712	0.0183885	12.7372
713	0.0186026	12.7441
714	0.018827	12.7507
715	0.0190546	12.7573
716	0.0192814	12.764
717	0.0195132	12.7706
718	0.0197541	12.7772
719	0.0199962	12.7839
720	0.0202391	12.7905
721	0.0205012	12.7974
722	0.0207631	12.804
723	0.0210205	12.8106
724	0.0212811	12.8173
725	0.0215539	12.8239
726	0.0218335	12.8306
727	0.0221165	12.8372
728	0.0224121	12.8438
729	0.0227153	12.8507
730	0.0230269	12.8573
731	0.0233363	12.864
732	0.0236609	12.8706
733	0.0239886	12.8773
734	0.0243124	12.8839
735	0.024651	12.8905
736	0.0249992	12.8972
737	0.025352	12.904
738	0.0257012	12.9107
739	0.0260715	12.9173
740	0.0264471	12.9239
741	0.0268196	12.9306
742	0.0272036	12.9372
743	0.0276072	12.9439
744	0.0280221	12.9505
745	0.0284321	12.9574
746	0.028874	12.964
747	0.0293238	12.9706
748	0.0297748	12.9773
749	0.0302321	12.9839
750	0.0307045	12.9906
751	0.0311896	12.9972
752	0.0316793	13.0038
753	0.0321947	13.0107
754	0.0327206	13.0173
755	0.0332525	13.024
756	0.0337767	13.0306
757	0.0343353	13.0372
758	0.034906	13.0439
759	0.0354735	13.0505
760	0.0360772	13.0572
761	0.036705	13.064
762	0.0373411	13.0707
763	0.0379709	13.0773
764	0.0386438	13.0839
765	0.0393347	13.0906
766	0.0400271	13.0972
767	0.0407441	13.1038
768	0.0414953	13.1105
769	0.0422706	13.1173
770	0.0430471	13.124
771	0.0438626	13.1306
772	0.0446973	13.1373
773	0.045555	13.1439
774	0.046451	13.1506
775	0.0473856	13.1572
776	0.0483496	13.1638
777	0.0493329	13.1707
778	0.0503774	13.1773
779	0.0514489	13.184
780	0.0525395	13.1906
781	0.0536756	13.1972
782	0.0548662	13.2039
783	0.056089	13.2105
784	0.0572999	13.2172
785	0.0586217	13.224
786	0.0599905	13.2307
787	0.0613887	13.2373
788	0.0628205	13.2439
789	0.0643505	13.2506
790	0.0659235	13.2572
791	0.067512	13.2638
792	0.0692486	13.2705
793	0.0710451	13.2773
794	0.0729048	13.284
795	0.0748045	13.2906
796	0.0768186	13.2972
797	0.0788937	13.3039
798	0.0810111	13.3105
799	0.0832668	13.3172
800	0.0856276	13.3238
801	0.088074	13.3307
802	0.0905322	13.3373
803	0.0931849	13.3439
804	0.0959178	13.3506
805	0.0986737	13.3572
806	0.101595	13.3639
807	0.104673	13.3705
808	0.107853	13.3771
809	0.111009	13.384
810	0.114448	13.3906
811	0.117976	13.3973
812	0.121584	13.4039
813	0.125281	13.4106
814	0.129241	13.4172
815	0.133291	13.4238
816	0.137326	13.4305
817	0.141695	13.4373
818	0.146192	13.444
819	0.150814	13.4506
820	0.155439	13.4572
821	0.160418	13.4639
822	0.165485	13.4705
823	0.170587	13.4771
824	0.175982	13.4838
825	0.181573	13.4907
826	0.187322	13.4973
827	0.19306	13.5039
828	0.199137	13.5106
829	0.205371	13.5172
830	0.211672	13.5238
831	0.218208	13.5305
832	0.22498	13.5371
833	0.231943	13.544
834	0.238924	13.5506
835	0.246282	13.5572
836	0.253805	13.5639
837	0.261285	13.5705
838	0.269131	13.5772
839	0.277219	13.5838
840	0.285433	13.5904
841	0.293678	13.5973
842	0.302287	13.6039
843	0.310989	13.6106
844	0.31971	13.6172
845	0.328823	13.6239
846	0.338123	13.6305
847	0.347542	13.6371
848	0.356959	13.6438
849	0.366701	13.6506
850	0.376564	13.6573
851	0.386497	13.6639
852	0.396787	13.6705
853	0.407213	13.6772
854	0.417734	13.6838
855	0.428116	13.6905
856	0.43885	13.6971
857	0.449805	13.704
858	0.460533	13.7106
859	0.471711	13.7172
860	0.482965	13.7239
861	0.494191	13.7305
862	0.505229	13.7371
863	0.516703	13.7438
864	0.528215	13.7504
865	0.539558	13.7573
866	0.551112	13.7639
867	0.562785	13.7706
868	0.574521	13.7772
869	0.585732	13.7838
870	0.597501	13.7905
871	0.609193	13.7971
872	0.620611	13.8038
873	0.632054	13.8106
874	0.643646	13.8173
875	0.655175	13.8239
876	0.666162	13.8305
877	0.677569	13.8372
878	0.688869	13.8438
879	0.699989	13.8504
880	0.710769	13.8571
881	0.721717	13.8639
882	0.732609	13.8706
883	0.743028	13.8772
884	0.753631	13.8839
885	0.76414	13.8905
886	0.774491	13.8971
887	0.784369	13.9038
888	0.79438	13.9104
889	0.804236	13.9173
890	0.813692	13.9239
891	0.823145	13.9306
892	0.832484	13.9372
893	0.841593	13.9438
894	0.850104	13.9505
895	0.858692	13.9571
896	0.867168	13.9637
897	0.875219	13.9706
898	0.88315	13.9772
899	0.890968	13.9839
900	0.898552	13.9905
901	0.905602	13.9971
902	0.912648	14.0038
903	0.91947	14.0104
904	0.92599	14.0171
905	0.93211	14.0239
906	0.938109	14.0306
907	0.943867	14.0372
908	0.949065	14.0438
909	0.954114	14.0505
910	0.959005	14.0571
911	0.96365	14.0638
912	0.967834	14.0704
913	0.971898	14.0773
914	0.975739	14.0839
915	0.979222	14.0905
916	0.982488	14.0972
917	0.985496	14.1038
918	0.988308	14.1105
919	0.99078	14.1171
920	0.992938	14.1237
921	0.994803	14.1306
922	0.996371	14.1372
923	0.997598	14.1439
924	0.998617	14.1505
925	0.999417	14.1572
926	0.999829	14.1638
927	1	14.1704
928	0.99993	14.1771
929	0.999606	14.1839
930	0.999069	14.1906
931	0.998296	14.1972
932	0.997302	14.2038
933	0.996097	14.2105
934	0.994648	14.2171
935	0.992931	14.2237
936	0.990983	14.2304
937	0.988781	14.2372
938	0.986291	14.2439
939	0.983576	14.2505
940	0.980681	14.2572
941	0.977386	14.2638
942	0.97388	14.2704
943	0.970208	14.2771
944	0.966349	14.2837
945	0.962165	14.2906
946	0.957843	14.2972
947	0.953468	14.3038
948	0.94893	14.3105
949	0.94414	14.3171
950	0.939216	14.3238
951	0.934356	14.3304
952	0.929129	14.337
953	0.923764	14.3439
954	0.918288	14.3505
955	0.912717	14.3572
956	0.906846	14.3638
957	0.900863	14.3704
958	0.894932	14.3771
959	0.888576	14.3837
960	0.882114	14.3904
961	0.875623	14.3972
962	0.869108	14.4039
963	0.86228	14.4105
964	0.855356	14.4171
965	0.848531	14.4238
966	0.841541	14.4304
967	0.834359	14.437
968	0.827037	14.4437
969	0.819996	14.4506
970	0.812603	14.4572
971	0.805062	14.4638
972	0.797646	14.4705
973	0.790139	14.4771
974	0.782396	14.4838
975	0.774617	14.4904
976	0.767076	14.497
977	0.759162	14.5039
978	0.751207	14.5105
979	0.743302	14.5172
980	0.735609	14.5238
981	0.727646	14.5304
982	0.719734	14.5371
983	0.712055	14.5437
984	0.704318	14.5503
985	0.696405	14.5572
986	0.688478	14.5639
987	0.680966	14.5705
988	0.673157	14.5771
989	0.665325	14.5838
990	0.657577	14.5904
991	0.650005	14.597
992	0.64216	14.6037
993	0.634324	14.6105
994	0.626762	14.6172
995	0.619131	14.6238
996	0.611364	14.6304
997	0.603651	14.6371
998	0.596268	14.6437
999	0.588566	14.6504
1000	0.58092	14.657
1001	0.573507	14.6639
1002	0.566176	14.6705
1003	0.558701	14.6772
1004	0.5513	14.6838
1005	0.544166	14.6904
1006	0.536875	14.6971
1007	0.529639	14.7037
1008	0.522451	14.7103
1009	0.515526	14.7172
1010	0.508485	14.7238
1011	0.501423	14.7305
1012	0.494567	14.7371
1013	0.487631	14.7438
1014	0.480678	14.7504
1015	0.473803	14.757
1016	0.46732	14.7637
1017	0.460561	14.7705
1018	0.453867	14.7772
1019	0.447383	14.7838
1020	0.440881	14.7904
1021	0.434371	14.7971
1022	0.42796	14.8037
1023	0.421897	14.8104
1024	0.415633	14.817
1025	0.409421	14.8238
1026	0.403294	14.8305
1027	0.397373	14.8371
1028	0.391344	14.8438
1029	0.385361	14.8504
1030	0.379606	14.8571
1031	0.373795	14.8637
1032	0.367991	14.8703
1033	0.362307	14.8772
1034	0.356909	14.8838
1035	0.351369	14.8905
1036	0.345891	14.8971
1037	0.340627	14.9037
1038	0.335366	14.9104
1039	0.330115	14.917
1040	0.324959	14.9237
1041	0.320016	14.9305
1042	0.31499	14.9371
1043	0.309994	14.9438
1044	0.305128	14.9504
1045	0.300372	14.9571
1046	0.295572	14.9637
1047	0.290816	14.9703
1048	0.28632	14.977
1049	0.28171	14.9838
1050	0.277153	14.9905
1051	0.272694	14.9971
1052	0.268394	15.0038
1053	0.26402	15.0104
1054	0.259681	15.017
1055	0.255542	15.0237
1056	0.251418	15.0303
1057	0.247301	15.0372
1058	0.243246	15.0438
1059	0.239446	15.0504
1060	0.235506	15.0571
1061	0.231621	15.0637
1062	0.227881	15.0704
1063	0.224213	15.077
1064	0.220536	15.0836
1065	0.216925	15.0905
1066	0.213462	15.0971
1067	0.209933	15.1038
1068	0.206451	15.1104
1069	0.203046	15.1171
1070	0.199778	15.1237
1071	0.196474	15.1303
1072	0.193196	15.1369
1073	0.190088	15.1438
1074	0.186935	15.1504
1075	0.183828	15.1571
1076	0.180791	15.1637
1077	0.177895	15.1704
1078	0.174981	15.177
1079	0.172098	15.1836
1080	0.169323	15.1903
1081	0.16655	15.1972
1082	0.163805	15.2038
1083	0.161083	15.2104
1084	0.158534	15.2171
1085	0.15592	15.2237
1086	0.153342	15.2303
1087	0.150874	15.237
1088	0.14841	15.2436
1089	0.145971	15.2505
1090	0.143609	15.2571
1091	0.141337	15.2637
1092	0.139051	15.2704
1093	0.136797	15.277
1094	0.134589	15.2837
1095	0.132418	15.2903
1096	0.130278	15.2969
1097	0.12816	15.3038
1098	0.12614	15.3105
1099	0.124109	15.3171
1100	0.122082	15.3237
1101	0.120135	15.3304
1102	0.118217	15.337
1103	0.116303	15.3436
1104	0.114444	15.3503
1105	0.112703	15.3571
1106	0.110916	15.3638
1107	0.109166	15.3704
1108	0.10746	15.377
1109	0.105808	15.3837
1110	0.104133	15.3903
1111	0.102505	15.397
1112	0.100976	15.4036
1113	0.0994203	15.4105
1114	0.0978784	15.4171
1115	0.0963499	15.4237
1116	0.0949004	15.4304
1117	0.0934303	15.437
1118	0.0919998	15.4437
1119	0.0906101	15.4503
1120	0.089246	15.4569
1121	0.0878965	15.4638
1122	0.0865603	15.4704
1123	0.0852726	15.4771
1124	0.0840005	15.4837
1125	0.0827532	15.4903
1126	0.0815174	15.497
1127	0.0803042	15.5036
1128	0.0791045	15.5102
1129	0.077943	15.5171
1130	0.0768155	15.5238
1131	0.0756832	15.5304
1132	0.0745704	15.537
1133	0.0735402	15.5437
1134	0.0724863	15.5503
1135	0.0714473	15.5569
1136	0.0704617	15.5636
1137	0.0695101	15.5704
1138	0.0685407	15.5771
1139	0.067585	15.5837
1140	0.0666799	15.5904
1141	0.06578	15.597
1142	0.0648774	15.6036
1143	0.0639851	15.6103
1144	0.0631501	15.6169
1145	0.0623037	15.6238
1146	0.0614661	15.6304
1147	0.0606556	15.6371
1148	0.0598674	15.6437
1149	0.0590805	15.6503
1150	0.0583101	15.657
1151	0.0575802	15.6636
1152	0.0568468	15.6703
1153	0.0561224	15.6771
1154	0.0554152	15.6838
1155	0.0547333	15.6904
1156	0.0540449	15.697
1157	0.0533666	15.7037
1158	0.0527166	15.7103
1159	0.052071	15.7169
1160	0.0514261	15.7236
1161	0.0507899	15.7304
1162	0.0501947	15.7371
1163	0.0495835	15.7437
1164	0.048983	15.7503
1165	0.0484086	15.757
1166	0.0478406	15.7636
1167	0.0472767	15.7703
1168	0.0467242	15.7769
1169	0.0461995	15.7838
1170	0.0456697	15.7904
1171	0.0451531	15.797
1172	0.0446462	15.8037
1173	0.0441509	15.8103
1174	0.0436575	15.8169
1175	0.0431714	15.8236
1176	0.0427063	15.8302
1177	0.0422458	15.8371
1178	0.0417952	15.8437
1179	0.0413507	15.8504
1180	0.0409213	15.857
1181	0.0404876	15.8636
1182	0.0400614	15.8703
1183	0.0396659	15.8769
1184	0.0392643	15.8835
1185	0.0388638	15.8904
1186	0.0384735	15.8971
1187	0.0380945	15.9037
1188	0.0377117	15.9103
1189	0.0373357	15.917
1190	0.036979	15.9236
1191	0.0366181	15.9302
1192	0.0362621	15.9369
1193	0.0359103	15.9437
1194	0.0355688	15.9504
1195	0.0352324	15.957
1196	0.034903	15.9637
1197	0.0345822	15.9703
1198	0.034263	15.9769
1199	0.0339466	15.9836
1200	0.0336356	15.9902
1201	0.0333409	15.9971
1202	0.0330344	16.0037
1203	0.0327328	16.0103
1204	0.0324488	16.017
1205	0.0321632	16.0236
1206	0.0318791	16.0303
1207	0.0316008	16.0369
1208	0.0313357	16.0435
1209	0.0310634	16.0504
1210	0.0307937	16.057
1211	0.0305332	16.0637
1212	0.0302879	16.0703
1213	0.0300411	16.077
1214	0.0297946	16.0836
1215	0.0295589	16.0902
1216	0.0293191	16.0969
1217	0.0290831	16.1037
1218	0.0288512	16.1104
1219	0.028627	16.117
1220	0.0284042	16.1236
1221	0.0281825	16.1303
1222	0.0279637	16.1369
1223	0.0277488	16.1436
1224	0.0275346	16.1502
1225	0.0273262	16.1571
1226	0.0271304	16.1637
1227	0.0269297	16.1703
1228	0.0267337	16.177
1229	0.0265465	16.1836
1230	0.0263556	16.1903
1231	0.0261629	16.1969
1232	0.0259746	16.2035
1233	0.0257917	16.2104
1234	0.0256118	16.217
1235	0.0254312	16.2237
1236	0.0252527	16.2303
1237	0.0250823	16.2369
1238	0.0249013	16.2436
1239	0.0247267	16.2502
1240	0.0245627	16.2568
1241	0.0243996	16.2637
1242	0.0242349	16.2703
1243	0.024072	16.277
1244	0.023913	16.2836
1245	0.0237536	16.2903
1246	0.0235956	16.2969
1247	0.023441	16.3035
1248	0.0232963	16.3102
1249	0.0231469	16.317
1250	0.0229998	16.3237
1251	0.0228621	16.3303
1252	0.0227245	16.3369
1253	0.022584	16.3436
1254	0.0224424	16.3502
1255	0.0223025	16.3569
1256	0.0221566	16.3635
1257	0.0220146	16.3704
1258	0.0218799	16.377
1259	0.0217469	16.3837
1260	0.0216089	16.3903
1261	0.0214708	16.3969
1262	0.0213434	16.4036
1263	0.0212173	16.4102
1264	0.0210974	16.4168
1265	0.0209861	16.4237
1266	0.0208743	16.4303
1267	0.0207615	16.437
1268	0.0206472	16.4436
1269	0.020531	16.4503
1270	0.0204216	16.4569
1271	0.0203128	16.4635
1272	0.0201982	16.4702
1273	0.0200837	16.477
1274	0.0199674	16.4837
1275	0.0198498	16.4903
1276	0.0197412	16.4969
1277	0.0196327	16.5036
1278	0.0195261	16.5102
1279	0.0194257	16.5169
1280	0.0193151	16.5235
1281	0.0192087	16.5304
1282	0.0191086	16.537
1283	0.0190149	16.5436
1284	0.018923	16.5503
1285	0.0188313	16.5569
1286	0.0187367	16.5635
1287	0.0186395	16.5702
1288	0.0185425	16.5768
1289	0.018447	16.5837
1290	0.0183615	16.5903
1291	0.0182713	16.597
1292	0.0181784	16.6036
1293	0.0180859	16.6102
1294	0.0179908	16.6169
1295	0.0178961	16.6235
1296	0.0178079	16.6301
1297	0.0177251	16.637
1298	0.017644	16.6436
1299	0.0175616	16.6503
1300	0.0174793	16.6569
1301	0.0173971	16.6636
1302	0.0173182	16.6702
1303	0.0172404	16.6768
1304	0.0171635	16.6835
1305	0.0170835	16.6903
1306	0.0170049	16.697
1307	0.0169272	16.7036
1308	0.0168452	16.7103
1309	0.0167631	16.7169
1310	0.0166835	16.7235
1311	0.016608	16.7302
1312	0.0165325	16.7368
1313	0.0164586	16.7437
1314	0.0163888	16.7503
1315	0.0163186	16.7569
1316	0.0162452	16.7636
1317	0.0161735	16.7702
1318	0.0161079	16.7768
1319	0.0160395	16.7835
1320	0.0159693	16.7901
1321	0.0158986	16.797
1322	0.0158267	16.8036
1323	0.0157538	16.8103
1324	0.0156811	16.8169
1325	0.0156138	16.8235
1326	0.0155463	16.8302
1327	0.0154761	16.8368
1328	0.0154039	16.8435
1329	0.015337	16.8503
1330	0.0152721	16.857
1331	0.0152069	16.8636
1332	0.0151412	16.8702
1333	0.01508	16.8769
1334	0.015016	16.8835
1335	0.0149534	16.8902
1336	0.0148958	16.8968
1337	0.0148312	16.9037
1338	0.0147723	16.9103
1339	0.0147195	16.9169
1340	0.0146649	16.9236
1341	0.0146098	16.9302
1342	0.0145558	16.9369
1343	0.0144959	16.9435
1344	0.0144393	16.9501
1345	0.0143834	16.957
1346	0.014327	16.9636
1347	0.0142797	16.9703
1348	0.0142246	16.9769
1349	0.0141635	16.9835
1350	0.0141046	16.9902
1351	0.0140505	16.9968
1352	0.0139943	17.0034
1353	0.0139402	17.0103
1354	0.0138876	17.0169
1355	0.0138358	17.0236
1356	0.0137837	17.0302
1357	0.0137321	17.0369
1358	0.0136776	17.0435
1359	0.0136275	17.0501
1360	0.0135818	17.0568
1361	0.0135384	17.0636
1362	0.0134995	17.0703
1363	0.0134606	17.0769
1364	0.0134174	17.0835
1365	0.0133669	17.0902
1366	0.0133172	17.0968
1367	0.0132694	17.1035
1368	0.0132303	17.1101
1369	0.0131926	17.117
1370	0.0131508	17.1236
1371	0.0131043	17.1303
1372	0.0130585	17.1369
1373	0.0130131	17.1435
1374	0.0129697	17.1502
1375	0.0129306	17.1568
1376	0.0128904	17.1634
1377	0.0128487	17.1703
1378	0.0128057	17.1769
1379	0.0127591	17.1836
1380	0.0127126	17.1902
1381	0.0126693	17.1969
1382	0.0126269	17.2035
1383	0.0125812	17.2101
1384	0.0125402	17.2168
1385	0.0125015	17.2236
1386	0.0124586	17.2303
1387	0.0124165	17.2369
1388	0.0123742	17.2435
1389	0.0123329	17.2502
1390	0.0122974	17.2568
1391	0.0122591	17.2634
1392	0.0122193	17.2701
1393	0.0121843	17.2769
1394	0.0121453	17.2836
1395	0.0121075	17.2902
1396	0.0120768	17.2969
1397	0.0120488	17.3035
1398	0.012014	17.3101
1399	0.0119762	17.3168
1400	0.0119347	17.3234
1401	0.0118978	17.3302
1402	0.0118602	17.3369
1403	0.0118225	17.3436
1404	0.0117897	17.3502
1405	0.0117562	17.3568
1406	0.0117199	17.3635
1407	0.0116781	17.3701
1408	0.0116443	17.3767
1409	0.0116119	17.3836
1410	0.0115785	17.3902
1411	0.0115427	17.3969
1412	0.0115116	17.4035
1413	0.0114809	17.4102
1414	0.0114451	17.4168
1415	0.0114055	17.4234
1416	0.0113695	17.4301
1417	0.0113378	17.4369
1418	0.0113047	17.4436
1419	0.0112728	17.4502
1420	0.0112434	17.4568
1421	0.0112155	17.4635
1422	0.0111804	17.4701
1423	0.0111509	17.4768
1424	0.0111252	17.4834
1425	0.0110987	17.4902
1426	0.0110709	17.4969
1427	0.0110423	17.5035
1428	0.0110146	17.5102
1429	0.0109866	17.5168
1430	0.0109602	17.5234
1431	0.0109321	17.5301
1432	0.0109028	17.5367
1433	0.0108715	17.5435
1434	0.0108394	17.5502
1435	0.0108127	17.5569
1436	0.0107901	17.5635
1437	0.0107622	17.5701
1438	0.0107334	17.5768
1439	0.0107061	17.5834
1440	0.0106785	17.5901
1441	0.0106478	17.5968
1442	0.0106209	17.6036
1443	0.0105923	17.6102
1444	0.0105626	17.6168
1445	0.0105338	17.6235
1446	0.010503	17.6301
1447	0.0104745	17.6367
1448	0.0104444	17.6434
1449	0.0104138	17.6502
1450	0.0103864	17.6569
1451	0.0103616	17.6635
1452	0.0103387	17.6702
1453	0.0103149	17.6768
1454	0.010288	17.6834
1455	0.0102617	17.6901
1456	0.0102344	17.6967
1457	0.01021	17.7035
1458	0.0101897	17.7102
1459	0.0101689	17.7168
1460	0.0101427	17.7235
1461	0.0101221	17.7301
1462	0.0100991	17.7368
1463	0.010076	17.7434
1464	0.0100575	17.75
1465	0.0100348	17.7568
1466	0.0100111	17.7635
1467	0.00998886	17.7702
1468	0.00997111	17.7768
1469	0.00994766	17.7835
1470	0.00992566	17.7901
1471	0.00990357	17.7967
1472	0.0098795	17.8034
1473	0.00985894	17.8101
1474	0.00983868	17.8169
1475	0.00981421	17.8235
1476	0.0097936	17.8301
1477	0.00977475	17.8368
1478	0.00975299	17.8434
1479	0.00973087	17.8501
1480	0.00971061	17.8567
1481	0.00968653	17.8635
1482	0.00966416	17.8702
1483	0.00964361	17.8769
1484	0.00962127	17.8835
1485	0.0096036	17.8901
1486	0.00958494	17.8968
1487	0.00956334	17.9034
1488	0.00953938	17.91
1489	0.00952232	17.9168
1490	0.00949694	17.9235
1491	0.00947423	17.9302
1492	0.00945797	17.9368
1493	0.00943646	17.9434
1494	0.00941456	17.9501
1495	0.00939643	17.9567
1496	0.00937973	17.9633
1497	0.00935824	17.9701
1498	0.00934006	17.9769
1499	0.00932446	17.9835
1500	0.00931289	17.9901
1501	0.00930348	17.9968
1502	0.0092906	18.0034
1503	0.00927638	18.01
1504	0.00926174	18.0167
1505	0.00924836	18.0234
1506	0.00923413	18.0302
1507	0.00922841	18.0368
1508	0.00921824	18.0435
1509	0.0092071	18.0501
1510	0.00919842	18.0567
1511	0.00918215	18.0634
1512	0.00916584	18.07
1513	0.00915306	18.0767
1514	0.00914545	18.0835
1515	0.00913487	18.0901
1516	0.00912207	18.0968
1517	0.00910585	18.1034
1518	0.00908876	18.1101
1519	0.00907273	18.1167
1520	0.00905676	18.1233
1521	0.00904358	18.13
1522	0.00903401	18.1368
1523	0.00902273	18.1435
1524	0.00900937	18.1501
1525	0.00899764	18.1567
1526	0.00898727	18.1634
1527	0.00897712	18.17
1528	0.00896921	18.1767
1529	0.00896539	18.1834
1530	0.00896176	18.1902
1531	0.00895783	18.1968
1532	0.00894695	18.2034
1533	0.00894157	18.2101
1534	0.00893762	18.2167
1535	0.00893328	18.2234
1536	0.00892632	18.23
1537	0.00892145	18.2367
1538	0.00891797	18.2435
1539	0.00890823	18.2501
1540	0.00890053	18.2568
1541	0.0088946	18.2634
1542	0.00889359	18.27
1543	0.00888465	18.2767
1544	0.00887943	18.2833
1545	0.00887709	18.29
1546	0.00887609	18.2968
1547	0.00887462	18.3035
1548	0.0088767	18.3101
1549	0.00888337	18.3167
1550	0.0088832	18.3234
1551	0.00888241	18.33
1552	0.00888197	18.3366
1553	0.00888637	18.3433
1554	0.00888854	18.3501
1555	0.00888999	18.3568
1556	0.00889315	18.3634
1557	0.00889551	18.3701
1558	0.00889807	18.3767
1559	0.00889956	18.3833
1560	0.00890768	18.39
1561	0.00891398	18.3967
1562	0.00892435	18.4035
1563	0.00893702	18.4101
1564	0.00894982	18.4168
1565	0.00895592	18.4234
1566	0.00896429	18.43
1567	0.0089764	18.4367
1568	0.00898614	18.4433
1569	0.00899488	18.45
1570	0.00900334	18.4568
1571	0.00901524	18.4635
1572	0.00902475	18.4701
1573	0.00903376	18.4767
1574	0.00904327	18.4833
1575	0.00905953	18.49
1576	0.00907363	18.4966
1577	0.00908651	18.5033
1578	0.00910226	18.5101
1579	0.00911844	18.5168
1580	0.0091356	18.5234
1581	0.00915421	18.53
1582	0.00917739	18.5367
1583	0.00919754	18.5433
1584	0.00921597	18.55
1585	0.00923611	18.5566
1586	0.0092554	18.5634
1587	0.00927649	18.5701
1588	0.00929756	18.5767
1589	0.00931591	18.5834
1590	0.0093358	18.59
1591	0.00935638	18.5967
1592	0.00937443	18.6033
1593	0.0093974	18.61
1594	0.00942091	18.6168
1595	0.00944257	18.6234
1596	0.00946697	18.6301
1597	0.00949031	18.6367
1598	0.00951136	18.6434
1599	0.00953514	18.65
1600	0.00955742	18.6566
1601	0.00957795	18.6633
1602	0.00959801	18.6701
1603	0.00962008	18.6768
1604	0.00964633	18.6834
1605	0.00967513	18.69
1606	0.00970397	18.6967
1607	0.00972995	18.7033
1608	0.0097634	18.7099
1609	0.00979839	18.7166
1610	0.00983134	18.7235
1611	0.00986385	18.7301
1612	0.00989359	18.7367
1613	0.00991902	18.7434
1614	0.00994307	18.75
1615	0.00996464	18.7566
1616	0.00998645	18.7633
1617	0.0100118	18.7699
1618	0.0100315	18.7768
1619	0.0100505	18.7834
1620	0.0100728	18.79
1621	0.0100987	18.7967
1622	0.0101266	18.8033
1623	0.0101557	18.81
1624	0.0101842	18.8166
1625	0.0102158	18.8232
1626	0.0102441	18.8301
1627	0.0102709	18.8367
1628	0.0102992	18.8434
1629	0.010328	18.85
1630	0.0103602	18.8567
1631	0.0103935	18.8633
1632	0.0104208	18.8699
1633	0.0104488	18.8766
1634	0.0104772	18.8834
1635	0.0105054	18.8901
1636	0.0105399	18.8967
1637	0.0105737	18.9033
1638	0.0106032	18.91
1639	0.01063	18.9166
1640	0.0106607	18.9233
1641	0.0106884	18.9299
1642	0.0107194	18.9368
1643	0.0107535	18.9434
1644	0.0107807	18.95
1645	0.0108038	18.9567
1646	0.0108272	18.9633
1647	0.010848	18.97
1648	0.0108721	18.9766
1649	0.0108996	18.9832
1650	0.0109173	18.9901
1651	0.0109347	18.9967
1652	0.0109529	19.0034
1653	0.0109646	19.01
1654	0.0109822	19.0166
1655	0.0110028	19.0233
1656	0.0110193	19.0299
1657	0.0110364	19.0366
1658	0.0110545	19.0434
1659	0.0110726	19.0501
1660	0.011093	19.0567
1661	0.011114	19.0633
1662	0.0111339	19.07
1663	0.0111542	19.0766
1664	0.0111735	19.0833
1665	0.0111938	19.0899
1666	0.011213	19.0967
1667	0.0112333	19.1034
1668	0.0112505	19.11
1669	0.0112663	19.1167
1670	0.0112799	19.1233
1671	0.0112902	19.1299
1672	0.0113021	19.1366
1673	0.0113151	19.1432
1674	0.0113275	19.1501
1675	0.0113336	19.1567
1676	0.0113415	19.1634
1677	0.0113493	19.17
1678	0.0113539	19.1766
1679	0.011354	19.1833
1680	0.011352	19.1899
1681	0.0113503	19.1966
1682	0.0113499	19.2034
1683	0.0113442	19.21
1684	0.0113345	19.2167
1685	0.0113237	19.2233
1686	0.0113106	19.2299
1687	0.0112975	19.2366
1688	0.0112862	19.2432
1689	0.0112766	19.2499
1690	0.0112647	19.2567
1691	0.0112515	19.2634
1692	0.0112349	19.27
1693	0.0112237	19.2766
1694	0.0112109	19.2833
1695	0.0111981	19.2899
1696	0.0111867	19.2966
1697	0.0111735	19.3032
1698	0.0111585	19.3101
1699	0.0111424	19.3167
1700	0.0111231	19.3233
1701	0.0111067	19.33
1702	0.0110908	19.3366
1703	0.0110704	19.3433
1704	0.0110506	19.3499
1705	0.011031	19.3565
1706	0.0110073	19.3634
1707	0.0109813	19.37
1708	0.0109515	19.3767
1709	0.0109213	19.3833
1710	0.0108971	19.39
1711	0.0108713	19.3966
1712	0.0108403	19.4032
1713	0.0108067	19.4099
1714	0.0107741	19.4167
1715	0.0107379	19.4234
1716	0.0107026	19.43
1717	0.0106712	19.4366
1718	0.0106407	19.4433
1719	0.0106033	19.4499
1720	0.0105616	19.4565
1721	0.0105181	19.4632
1722	0.0104761	19.47
1723	0.0104333	19.4767
1724	0.0103892	19.4833
1725	0.0103504	19.49
1726	0.0103083	19.4966
1727	0.0102621	19.5032
1728	0.010217	19.5099
1729	0.0101756	19.5165
1730	0.0101334	19.5234
1731	0.0100877	19.53
1732	0.0100404	19.5366
1733	0.00999329	19.5433
1734	0.0099451	19.5499
1735	0.00989185	19.5566
1736	0.00984475	19.5632
1737	0.0097967	19.5698
1738	0.00974635	19.5767
1739	0.00969149	19.5833
1740	0.00963963	19.59
1741	0.00958545	19.5966
1742	0.00952713	19.6033
1743	0.00947203	19.6099
1744	0.00942205	19.6165
1745	0.00937602	19.6232
1746	0.00932202	19.63
1747	0.00926554	19.6367
1748	0.0092102	19.6433
1749	0.00916026	19.6499
1750	0.00910675	19.6566
1751	0.0090561	19.6632
1752	0.00901153	19.6699
1753	0.00896548	19.6765
1754	0.00891392	19.6834
1755	0.00885716	19.69
1756	0.00879942	19.6966
1757	0.00873787	19.7033
1758	0.00868276	19.7099
1759	0.00863012	19.7165
1760	0.00857869	19.7232
1761	0.00852455	19.7298
1762	0.00847012	19.7367
1763	0.00841551	19.7433
1764	0.00835842	19.75
1765	0.008306	19.7566
1766	0.00825765	19.7632
1767	0.00821457	19.7699
1768	0.00816775	19.7765
1769	0.00811585	19.7831
1770	0.00806153	19.79
1771	0.00800925	19.7967
1772	0.00795883	19.8033
1773	0.00791114	19.8099
1774	0.00786966	19.8166
1775	0.00781918	19.8232
1776	0.0077664	19.8298
1777	0.00771548	19.8365
1778	0.00766323	19.8433
1779	0.00761647	19.85
1780	0.00757186	19.8566
1781	0.00752864	19.8632
1782	0.00748722	19.8699
1783	0.00744516	19.8765
1784	0.00740213	19.8832
1785	0.00736662	19.8898
1786	0.00732952	19.8967
1787	0.00728896	19.9033
1788	0.00724742	19.91
1789	0.00720752	19.9166
1790	0.00717055	19.9232
1791	0.00713722	19.9299
1792	0.00710327	19.9365
1793	0.00706129	19.9431
1794	0.00702346	19.95
1795	0.00698771	19.9566
1796	0.0069539	19.9633
1797	0.00692677	19.9699
1798	0.00690148	19.9765
1799	0.00687443	19.9832
1800	0.00684961	19.9898
1801	0.00681755	19.9965
1802	0.00678641	20.0033
1803	0.0067676	20.01
1804	0.00673983	20.0166
1805	0.00671049	20.0232
1806	0.00668553	20.0299
1807	0.00666275	20.0365
1808	0.00663908	20.0432
1809	0.0066151	20.0498
1810	0.00658881	20.0567
1811	0.00656731	20.0633
1812	0.00654663	20.0699
1813	0.00652218	20.0766
1814	0.00650243	20.0832
1815	0.00648679	20.0899
1816	0.00647176	20.0965
1817	0.00645464	20.1031
1818	0.00644143	20.11
1819	0.00642754	20.1166
1820	0.00641472	20.1233
1821	0.00640437	20.1299
1822	0.00639245	20.1365
1823	0.00637935	20.1432
1824	0.00636741	20.1498
1825	0.00635739	20.1565
1826	0.00634948	20.1633
1827	0.00633935	20.17
1828	0.00632259	20.1766
1829	0.00631152	20.1832
1830	0.00629969	20.1899
1831	0.00628666	20.1965
1832	0.00627391	20.2031
1833	0.00626203	20.2098
1834	0.00625312	20.2166
1835	0.00624306	20.2233
1836	0.0062274	20.2299
1837	0.00621612	20.2366
1838	0.00621088	20.2432
1839	0.0061982	20.2498
1840	0.00618804	20.2565
1841	0.00618097	20.2631
1842	0.00617578	20.27
1843	0.00616738	20.2766
1844	0.00615713	20.2832
1845	0.00614652	20.2899
1846	0.00614311	20.2965
1847	0.00613466	20.3032
1848	0.0061275	20.3098
1849	0.0061266	20.3164
1850	0.00612576	20.3233
1851	0.00612119	20.3299
1852	0.00611496	20.3366
1853	0.00611449	20.3432
1854	0.00610825	20.3498
1855	0.00610436	20.3565
1856	0.00609998	20.3631
1857	0.00610075	20.3698
1858	0.00609941	20.3766
1859	0.00609556	20.3833
1860	0.00608985	20.3899
1861	0.00608629	20.3965
1862	0.00608061	20.4032
1863	0.00607303	20.4098
1864	0.00607382	20.4164
1865	0.00607408	20.4231
1866	0.00607157	20.43
1867	0.00606621	20.4366
1868	0.00606235	20.4432
1869	0.00605733	20.4499
1870	0.00605195	20.4565
1871	0.00604498	20.4631
1872	0.0060419	20.4698
1873	0.00604094	20.4764
1874	0.00603904	20.4833
1875	0.00603305	20.4899
1876	0.00602803	20.4965
1877	0.00602387	20.5032
1878	0.00601713	20.5098
1879	0.00601343	20.5165
1880	0.00601071	20.5231
1881	0.00600759	20.5297
1882	0.00600479	20.5366
1883	0.00599982	20.5432
1884	0.00599329	20.5499
1885	0.00598827	20.5565
1886	0.00598047	20.5587
1887	0.00597182	20.561
1888	0.00596407	20.5649
1889	0.00595671	20.5704
1890	0.00595258	20.577
1891	0.00595141	20.5837
1892	0.00594242	20.5905
1893	0.00593489	20.5972
1894	0.00592926	20.6038
1895	0.00592498	20.6105
1896	0.00592079	20.6171
1897	0.00592154	20.6237
1898	0.00592506	20.6304
1899	0.005925	20.637
1900	0.00591658	20.6439
1901	0.00590597	20.6505
1902	0.00590103	20.6572
1903	0.00589656	20.6638
1904	0.00589502	20.6704
1905	0.00589099	20.6771
1906	0.00588403	20.6837
1907	0.00587107	20.6903
1908	0.00585756	20.6972
1909	0.00584736	20.7038
1910	0.00584125	20.7105
1911	0.00583692	20.7171
1912	0.00583361	20.7237
1913	0.00583071	20.7304
1914	0.00581781	20.737
1915	0.00580835	20.7437
1916	0.00580597	20.7505
1917	0.00580446	20.7572
1918	0.00580017	20.7638
1919	0.00579456	20.7704
1920	0.00579103	20.7771
1921	0.00578413	20.7837
1922	0.00577424	20.7904
1923	0.00576133	20.797
1924	0.00575361	20.8039
1925	0.00574349	20.8105
1926	0.00573302	20.8171
1927	0.00572766	20.8238
1928	0.00571101	20.8304
1929	0.00569649	20.837
1930	0.00568274	20.8437
1931	0.00567073	20.8503
1932	0.00566046	20.8572
1933	0.00565303	20.8638
1934	0.00564657	20.8705
1935	0.00563579	20.8771
1936	0.0056253	20.8837
1937	0.00560865	20.8904
1938	0.00560133	20.897
1939	0.005595	20.9037
1940	0.00558387	20.9105
1941	0.00557231	20.9172
1942	0.00556141	20.9238
1943	0.00554884	20.9304
1944	0.00553486	20.9371
1945	0.00552354	20.9437
1946	0.00550763	20.9503
1947	0.00549458	20.957
1948	0.0054831	20.9638
1949	0.00546639	20.9705
1950	0.00545708	20.9771
1951	0.00544649	20.9838
1952	0.00543477	20.9904
1953	0.00542433	20.997
1954	0.00541036	21.0037
1955	0.00539997	21.0103
1956	0.00539278	21.0172
1957	0.00538172	21.0238
1958	0.00537581	21.0304
1959	0.00536945	21.0371
1960	0.00535416	21.0437
1961	0.00534187	21.0504
1962	0.0053294	21.057
1963	0.00531541	21.0636
1964	0.00530515	21.0705
1965	0.00529473	21.0771
1966	0.00528322	21.0838
1967	0.00527438	21.0904
1968	0.0052605	21.097
1969	0.00524961	21.1037
1970	0.00524333	21.1103
1971	0.00523472	21.117
1972	0.0052332	21.1238
1973	0.00522928	21.1304
1974	0.00522302	21.1371
1975	0.00521569	21.1437
1976	0.00520725	21.1504
1977	0.00519861	21.157
1978	0.00519109	21.1636
1979	0.0051901	21.1703
1980	0.00519063	21.1772
1981	0.00519369	21.1838
1982	0.0051907	21.1904
1983	0.00519409	21.1971
1984	0.00520204	21.2037
1985	0.00520952	21.2103
1986	0.00521774	21.217
1987	0.0052303	21.2236
1988	0.00524582	21.2305
1989	0.00525417	21.2371
1990	0.00526111	21.2437
1991	0.00527018	21.2504
1992	0.00528334	21.257
1993	0.00529583	21.2637
1994	0.00530903	21.2703
1995	0.00532264	21.2769
1996	0.00533644	21.2838
1997	0.00535036	21.2904
1998	0.00536751	21.2971
[truncated: 105 more rows]

## Sheet: Extended Data Fig. 3c
CH15.1	uv 230	vol 230
0	0	8.00648
1	1.76e-06	8.01311
2	1.47069e-05	8.01975
3	1.76616e-05	8.02638
4	9.30956e-06	8.03302
5	7.73499e-06	8.03966
6	8.60749e-06	8.0448
7	8.35484e-06	8.04692
8	1.31085e-05	8.04984
9	2.78961e-05	8.05449
10	4.6645e-05	8.06076
11	6.1193e-05	8.0674
12	6.29695e-05	8.07404
13	7.16946e-05	8.08068
14	9.45617e-05	8.08731
15	0.000118382	8.09395
16	0.000131339	8.10082
17	0.000132608	8.10746
18	0.000132368	8.1141
19	0.000123897	8.12073
20	0.000112636	8.12737
21	0.000105695	8.13401
22	0.00010421	8.14064
23	0.000100424	8.14728
24	0.000108025	8.15415
25	0.000109846	8.16078
26	0.000110539	8.16742
27	0.000121701	8.17405
28	0.00013361	8.18069
29	0.000144625	8.18732
30	0.000154141	8.19396
31	0.000165465	8.20059
32	0.000172624	8.20747
33	0.000187203	8.2141
34	0.000190214	8.22074
35	0.000183469	8.22738
36	0.000183182	8.23401
37	0.000181195	8.24065
38	0.000182234	8.24728
39	0.000190329	8.25393
40	0.000200119	8.26079
41	0.00020861	8.26742
42	0.000217712	8.27406
43	0.00021861	8.2807
44	0.000221736	8.28734
45	0.000236549	8.29399
46	0.00024206	8.30062
47	0.000250282	8.30726
48	0.000260463	8.31413
49	0.000263725	8.32077
50	0.000264822	8.3274
51	0.000263893	8.33405
52	0.000260572	8.34068
53	0.000270466	8.34732
54	0.000282238	8.35396
55	0.000286362	8.3606
56	0.000299857	8.36746
57	0.000316911	8.37409
58	0.000327417	8.38073
59	0.000336114	8.38737
60	0.000347728	8.394
61	0.000362907	8.40064
62	0.000383701	8.40728
63	0.000393827	8.41391
64	0.000397705	8.42079
65	0.000409044	8.42743
66	0.000427908	8.43406
67	0.000442892	8.4407
68	0.000463656	8.44734
69	0.000487532	8.45398
70	0.000510881	8.46061
71	0.000533054	8.46725
72	0.000551934	8.47411
73	0.000564795	8.48074
74	0.000577426	8.48738
75	0.000594414	8.49402
76	0.000604994	8.50066
77	0.000624868	8.5073
78	0.000638468	8.51393
79	0.000645585	8.52057
80	0.000652481	8.52744
81	0.000659899	8.53408
82	0.000668208	8.54072
83	0.000681511	8.54736
84	0.000695999	8.554
85	0.000706331	8.56063
86	0.000734015	8.56727
87	0.000753228	8.5739
88	0.00076514	8.58077
89	0.000786306	8.5874
90	0.00081704	8.59404
91	0.00084582	8.60068
92	0.000871973	8.60732
93	0.000899557	8.61397
94	0.000929936	8.6206
95	0.000966597	8.62724
96	0.00098696	8.63411
97	0.00100634	8.64076
98	0.00103477	8.64739
99	0.00106324	8.65402
100	0.00108372	8.66066
101	0.00111091	8.6673
102	0.00113753	8.67394
103	0.00115929	8.68057
104	0.00118498	8.68744
105	0.00120912	8.69407
106	0.00122954	8.70071
107	0.00124843	8.70735
108	0.00126396	8.71398
109	0.0012783	8.72061
110	0.00130753	8.72725
111	0.00133069	8.73388
112	0.00135569	8.74076
113	0.00138215	8.74739
114	0.0014025	8.75403
115	0.00141754	8.76067
116	0.00143398	8.76731
117	0.00146414	8.77394
118	0.00149974	8.78058
119	0.00153341	8.78722
120	0.00155217	8.79408
121	0.00158186	8.80071
122	0.00160733	8.80735
123	0.00162618	8.81399
124	0.00164579	8.82063
125	0.00166702	8.82726
126	0.00169703	8.8339
127	0.00171749	8.84054
128	0.00173977	8.84741
129	0.00176265	8.85405
130	0.00178729	8.86069
131	0.00180103	8.86732
132	0.00181959	8.87396
133	0.00184922	8.8806
134	0.00188541	8.88724
135	0.00192314	8.89387
136	0.0019545	8.90074
137	0.00198562	8.90737
138	0.0020137	8.91401
139	0.00203877	8.92065
140	0.00206031	8.92728
141	0.00209234	8.93391
142	0.0021223	8.94054
143	0.0021459	8.94718
144	0.00216327	8.95406
145	0.00217983	8.96069
146	0.00220004	8.96733
147	0.00222038	8.97397
148	0.00224509	8.9806
149	0.00227337	8.98724
150	0.0023048	8.99388
151	0.00232625	9.00051
152	0.00235276	9.00738
153	0.00238243	9.01401
154	0.00241353	9.02065
155	0.00244464	9.02729
156	0.00247177	9.03393
157	0.00249961	9.04058
158	0.00252393	9.04721
159	0.00253991	9.05385
160	0.0025507	9.06072
161	0.00256701	9.06737
162	0.0025805	9.074
163	0.00260044	9.08064
164	0.00261715	9.08728
165	0.0026312	9.09391
166	0.00264762	9.10054
167	0.00266361	9.10719
168	0.00268171	9.11405
169	0.00270875	9.12068
170	0.00274081	9.12732
171	0.00276726	9.13396
172	0.00279759	9.14059
173	0.00281893	9.14725
174	0.0028368	9.15388
175	0.00285815	9.16052
176	0.00287933	9.16739
177	0.00290544	9.17403
178	0.0029341	9.18067
179	0.00296129	9.18731
180	0.00298499	9.19394
181	0.00300801	9.20058
182	0.0030256	9.20721
183	0.00304491	9.21385
184	0.00306981	9.22072
185	0.00309674	9.22735
186	0.0031245	9.23399
187	0.00314962	9.24063
188	0.00316245	9.24726
189	0.00317137	9.25389
190	0.00319139	9.26053
191	0.0032141	9.26716
192	0.00323333	9.27403
193	0.00325272	9.28067
194	0.00327484	9.28731
195	0.00329273	9.29395
196	0.00330625	9.30058
197	0.003314	9.30722
198	0.00332746	9.31386
199	0.00334517	9.32049
200	0.00335194	9.32736
201	0.0033548	9.334
202	0.00336141	9.34063
203	0.00337507	9.34727
204	0.0033849	9.35391
205	0.00339608	9.36056
206	0.00340828	9.3672
207	0.00342244	9.37383
208	0.00343232	9.3807
209	0.00343814	9.38734
210	0.00345812	9.39398
211	0.00348431	9.40062
212	0.00349946	9.40725
213	0.00350659	9.41389
214	0.00351976	9.42053
215	0.0035314	9.42716
216	0.00354171	9.43403
217	0.00354984	9.44066
218	0.00356207	9.4473
219	0.00357561	9.45394
220	0.00357348	9.46058
221	0.00357507	9.4672
222	0.00358985	9.47384
223	0.00360332	9.48047
224	0.00361179	9.48734
225	0.00363172	9.49398
226	0.00365027	9.50063
227	0.00366531	9.50726
228	0.00367769	9.5139
229	0.00368889	9.52053
230	0.00371359	9.52717
231	0.00373642	9.53381
232	0.0037502	9.54067
233	0.00376405	9.54731
234	0.00378222	9.55394
235	0.00378856	9.56059
236	0.00379464	9.56722
237	0.00380785	9.57386
238	0.00383019	9.58049
239	0.0038546	9.58713
240	0.00386581	9.594
241	0.00387252	9.60064
242	0.00388683	9.60728
243	0.00390483	9.61392
244	0.00391754	9.62056
245	0.00393342	9.62719
246	0.00395247	9.63383
247	0.0039728	9.64046
248	0.00398287	9.64733
249	0.00398877	9.65396
250	0.00400179	9.6606
251	0.00401656	9.66724
252	0.00403092	9.67387
253	0.00404322	9.6805
254	0.00406724	9.68713
255	0.00408736	9.69377
256	0.00409431	9.70064
257	0.00409907	9.70728
258	0.00411399	9.71392
259	0.00413488	9.72056
260	0.00415044	9.72719
261	0.00415623	9.73383
262	0.00415824	9.74047
263	0.00418053	9.7471
264	0.00419571	9.75397
265	0.00420483	9.7606
266	0.00422549	9.76724
267	0.00424394	9.77388
268	0.00425581	9.78052
269	0.00426652	9.78717
270	0.00427775	9.79381
271	0.0042963	9.80044
272	0.00432734	9.80731
273	0.00434319	9.81395
274	0.00435733	9.82059
275	0.00437935	9.82723
276	0.00439143	9.83387
277	0.00440352	9.84051
278	0.00441819	9.84713
279	0.00443561	9.85378
280	0.00445625	9.86064
281	0.00446826	9.86728
282	0.00446456	9.87391
283	0.00446607	9.88055
284	0.00446867	9.88719
285	0.0044703	9.89382
286	0.00448191	9.90046
287	0.00449335	9.9071
288	0.00450396	9.91397
289	0.00451788	9.92061
290	0.00452451	9.92725
291	0.00453412	9.93388
292	0.00454984	9.94052
293	0.0045549	9.94716
294	0.00456092	9.95379
295	0.00456888	9.96043
296	0.0045717	9.96729
297	0.00457419	9.97393
298	0.0045821	9.98057
299	0.0045862	9.98721
300	0.00459836	9.99385
301	0.00461232	10.0005
302	0.00462386	10.0071
303	0.00463648	10.0138
304	0.00464426	10.0206
305	0.00466028	10.0273
306	0.00468427	10.0339
307	0.00470298	10.0405
308	0.00471566	10.0472
309	0.00473621	10.0538
310	0.0047521	10.0604
311	0.00477197	10.0671
312	0.00479469	10.074
313	0.00481671	10.0806
314	0.00484022	10.0872
315	0.00485483	10.0939
316	0.00487434	10.1005
317	0.00490061	10.1072
318	0.00492916	10.1138
319	0.00494845	10.1204
320	0.00496908	10.1273
321	0.00498581	10.1339
322	0.0049988	10.1406
323	0.00502217	10.1472
324	0.00505323	10.1538
325	0.00508314	10.1605
326	0.00510534	10.1671
327	0.00513173	10.1738
328	0.00515529	10.1806
329	0.00517277	10.1873
330	0.00519132	10.1939
331	0.00522208	10.2005
332	0.00525862	10.2072
333	0.00528791	10.2138
334	0.00530987	10.2204
335	0.00533368	10.2271
336	0.00536567	10.2339
337	0.0053945	10.2406
338	0.00542552	10.2472
339	0.00546354	10.2539
340	0.00550788	10.2605
341	0.00554196	10.2671
342	0.00557369	10.2738
343	0.00560696	10.2804
344	0.00564351	10.2873
345	0.00568741	10.2939
346	0.00572827	10.3005
347	0.00577065	10.3072
348	0.00581145	10.3138
349	0.00585496	10.3205
350	0.00588982	10.3271
351	0.00593	10.3337
352	0.00597401	10.3406
353	0.00602177	10.3472
354	0.00607222	10.3539
355	0.00612269	10.3605
356	0.0061632	10.3671
357	0.00619712	10.3738
358	0.00624108	10.3804
359	0.00628329	10.3871
360	0.00634624	10.3939
361	0.00640487	10.4006
362	0.00646241	10.4072
363	0.0065165	10.4138
364	0.00657315	10.4205
365	0.00662756	10.4271
366	0.00669366	10.4337
367	0.00676595	10.4404
368	0.0068289	10.4472
369	0.00689819	10.4539
370	0.0069477	10.4605
371	0.00701818	10.4671
372	0.00708776	10.4738
373	0.00715898	10.4804
374	0.00722362	10.4871
375	0.00728858	10.4937
376	0.00735301	10.5006
377	0.00741874	10.5072
378	0.00749109	10.5138
379	0.00755794	10.5205
380	0.00763487	10.5271
381	0.00769171	10.5338
382	0.00775252	10.5404
383	0.00781005	10.547
384	0.00787325	10.5539
385	0.0079382	10.5605
386	0.00800822	10.5672
387	0.0080831	10.5738
388	0.00815564	10.5805
389	0.00823807	10.5871
390	0.00831183	10.5937
391	0.00839184	10.6004
392	0.00846736	10.6072
393	0.00854466	10.6139
394	0.00861968	10.6205
395	0.00870089	10.6271
396	0.00877733	10.6338
397	0.00885058	10.6404
398	0.00892343	10.6471
399	0.00898577	10.6537
400	0.00905518	10.6606
401	0.00911878	10.6672
402	0.00920982	10.6738
403	0.0092973	10.6805
404	0.00938497	10.6871
405	0.00946261	10.6937
406	0.00954273	10.7004
407	0.00962515	10.707
408	0.00970956	10.7139
409	0.00979953	10.7205
410	0.00988267	10.7272
411	0.00996877	10.7338
412	0.0100278	10.7404
413	0.0100983	10.7471
414	0.0101646	10.7537
415	0.0102378	10.7603
416	0.0103084	10.7672
417	0.0103792	10.7739
418	0.0104472	10.7805
419	0.0105103	10.7871
420	0.0105833	10.7938
421	0.0106553	10.8004
422	0.0107287	10.807
423	0.0107918	10.8137
424	0.0108703	10.8205
425	0.0109423	10.8272
426	0.0110204	10.8338
427	0.0110942	10.8405
428	0.0111684	10.8471
429	0.0112483	10.8537
430	0.0113197	10.8604
431	0.011399	10.867
432	0.0114783	10.8739
433	0.0115676	10.8805
434	0.0116387	10.8872
435	0.0117084	10.8938
436	0.0117711	10.9004
437	0.0118408	10.9071
438	0.0119103	10.9137
439	0.0119756	10.9203
440	0.0120471	10.9272
441	0.0121113	10.9338
442	0.0121862	10.9405
443	0.0122501	10.9471
444	0.012313	10.9538
445	0.0123802	10.9604
446	0.0124681	10.967
447	0.0125507	10.9737
448	0.0126367	10.9805
449	0.0127173	10.9872
450	0.0127862	10.9938
451	0.0128669	11.0004
452	0.0129397	11.0071
453	0.0130321	11.0137
454	0.0131273	11.0204
455	0.013224	11.027
456	0.0133008	11.0339
457	0.0133889	11.0405
458	0.0134662	11.0471
459	0.0135417	11.0538
460	0.0136269	11.0604
461	0.0137011	11.067
462	0.0137909	11.0737
463	0.0138647	11.0803
464	0.0139446	11.0872
465	0.0140185	11.0938
466	0.014107	11.1005
467	0.0141831	11.1071
468	0.014273	11.1137
469	0.0143732	11.1204
470	0.0144725	11.127
471	0.0145778	11.1336
472	0.0146675	11.1405
473	0.0147727	11.1471
474	0.0148729	11.1538
475	0.0149803	11.1604
476	0.0150714	11.1671
477	0.0151781	11.1737
478	0.0152807	11.1803
479	0.015388	11.187
480	0.0154951	11.1938
481	0.0155971	11.2005
482	0.015708	11.2071
483	0.0158038	11.2137
484	0.0159171	11.2204
485	0.0160238	11.227
486	0.0161547	11.2337
487	0.0162713	11.2403
488	0.0163998	11.2472
489	0.0165233	11.2538
490	0.0166492	11.2604
491	0.0167773	11.2671
492	0.0168961	11.2737
493	0.0170316	11.2804
494	0.0171525	11.287
495	0.0172898	11.2936
496	0.0174026	11.3005
497	0.0175414	11.3071
498	0.0176654	11.3138
499	0.0177936	11.3204
500	0.0179207	11.3271
501	0.0180502	11.3337
502	0.0181913	11.3403
503	0.0183197	11.347
504	0.0184619	11.3538
505	0.0185887	11.3605
506	0.0187337	11.3671
507	0.0188504	11.3737
508	0.0189797	11.3804
509	0.0191048	11.387
510	0.0192368	11.3936
511	0.0193703	11.4003
512	0.0194989	11.4071
513	0.0196279	11.4138
514	0.0197411	11.4204
515	0.0198799	11.4271
516	0.020001	11.4337
517	0.0201296	11.4403
518	0.0202471	11.447
519	0.0203815	11.4536
520	0.0205074	11.4605
521	0.0206337	11.4671
522	0.0207541	11.4737
523	0.0208693	11.4804
524	0.0210014	11.487
525	0.0211103	11.4937
526	0.0212365	11.5003
527	0.0213553	11.5069
528	0.0214857	11.5138
529	0.0215958	11.5204
530	0.0217093	11.5271
531	0.0218238	11.5337
532	0.0219478	11.5404
533	0.022078	11.547
534	0.0221928	11.5536
535	0.0223235	11.5603
536	0.0224367	11.5671
537	0.022558	11.5738
538	0.0226651	11.5804
539	0.0227865	11.587
540	0.0229016	11.5937
541	0.0230126	11.6003
542	0.0231193	11.607
543	0.0232265	11.6136
544	0.0233379	11.6205
545	0.0234306	11.6271
546	0.0235305	11.6338
547	0.0236205	11.6404
548	0.0237276	11.647
549	0.0238199	11.6537
550	0.0239243	11.6603
551	0.0240226	11.6669
552	0.0241161	11.6738
553	0.0242087	11.6804
554	0.0243016	11.6871
555	0.0243953	11.6937
556	0.0244795	11.7004
557	0.0245708	11.707
558	0.0246432	11.7136
559	0.0247305	11.7202
560	0.0248035	11.7271
561	0.0248851	11.7338
562	0.024965	11.7404
563	0.0250444	11.747
564	0.0251178	11.7537
565	0.0251898	11.7603
566	0.0252722	11.7669
567	0.0253511	11.7736
568	0.0254349	11.7804
569	0.0255018	11.7871
570	0.025577	11.7937
571	0.0256416	11.8004
572	0.0257049	11.807
573	0.0257638	11.8136
574	0.025826	11.8203
575	0.0258887	11.8269
576	0.0259418	11.8338
577	0.0259917	11.8404
578	0.0260355	11.8471
579	0.0260982	11.8537
580	0.0261527	11.8603
581	0.02622	11.867
582	0.0262871	11.8736
583	0.0263581	11.8802
584	0.0264207	11.8871
585	0.026478	11.8937
586	0.0265482	11.9004
587	0.0266252	11.907
588	0.0267125	11.9137
589	0.0267817	11.9203
590	0.0268556	11.9269
591	0.0269182	11.9335
592	0.0269933	11.9404
593	0.027061	11.9471
594	0.0271343	11.9537
595	0.0272147	11.9603
596	0.0272855	11.967
597	0.0273504	11.9736
598	0.027406	11.9802
599	0.0274745	11.9869
600	0.0275386	11.9937
601	0.0276124	12.0004
602	0.0276732	12.007
603	0.0277436	12.0137
604	0.0278145	12.0203
605	0.0278872	12.0269
606	0.0279591	12.0336
607	0.0280323	12.0402
608	0.0281144	12.0471
609	0.0281852	12.0537
610	0.0282742	12.0604
611	0.0283546	12.067
612	0.028446	12.0736
613	0.0285297	12.0803
614	0.0286248	12.0869
615	0.0287169	12.0935
616	0.0288121	12.1004
617	0.0289166	12.107
618	0.0290218	12.1137
619	0.0291352	12.1203
620	0.0292318	12.127
621	0.0293286	12.1336
622	0.0294137	12.1402
623	0.0295288	12.1469
624	0.0296307	12.1537
625	0.0297408	12.1604
626	0.0298499	12.167
627	0.0299571	12.1737
628	0.0300661	12.1803
629	0.0301738	12.1869
630	0.0302936	12.1936
631	0.0304155	12.2002
632	0.0305678	12.207
633	0.030691	12.2137
634	0.030827	12.2203
635	0.0309549	12.227
636	0.0310909	12.2336
637	0.0312281	12.2403
638	0.0313691	12.2469
639	0.0315249	12.2535
640	0.0316844	12.2604
641	0.031861	12.267
642	0.0320137	12.2737
643	0.0321878	12.2803
644	0.0323508	12.287
645	0.0325378	12.2936
646	0.0327201	12.3002
647	0.0329261	12.3069
648	0.0331289	12.3137
649	0.0333249	12.3204
650	0.033534	12.327
651	0.0337438	12.3336
652	0.0339809	12.3403
653	0.034203	12.3469
654	0.034461	12.3536
655	0.0346975	12.3602
656	0.0349872	12.367
657	0.0352554	12.3737
658	0.0355538	12.3803
659	0.0358675	12.387
660	0.0361915	12.3936
661	0.0365334	12.4003
662	0.0368646	12.4069
663	0.0372379	12.4135
664	0.0375829	12.4203
665	0.0379978	12.427
666	0.0383649	12.4337
667	0.0387967	12.4403
668	0.0392153	12.4469
669	0.0396649	12.4536
670	0.0401198	12.4602
671	0.0405815	12.4668
672	0.0410896	12.4736
673	0.0415781	12.4803
674	0.042149	12.487
675	0.0426618	12.4936
676	0.0432644	12.5003
677	0.0438099	12.5069
678	0.0444295	12.5135
679	0.0450294	12.5202
680	0.0456618	12.527
681	0.0463061	12.5337
682	0.0469344	12.5403
683	0.0476207	12.5469
684	0.0482507	12.5536
685	0.048977	12.5602
686	0.0496215	12.5669
687	0.0503801	12.5735
688	0.0510613	12.5803
689	0.0518216	12.587
690	0.0525471	12.5936
691	0.0533018	12.6003
692	0.0540774	12.6069
693	0.0548322	12.6136
694	0.0556517	12.6202
695	0.0563993	12.6268
696	0.0572554	12.6336
697	0.0580017	12.6403
698	0.0588543	12.647
699	0.0596068	12.6536
700	0.0604262	12.6602
701	0.0612065	12.6669
702	0.062009	12.6735
703	0.0628187	12.6801
704	0.0635966	12.6869
705	0.0644278	12.6937
706	0.0651676	12.7003
707	0.0659942	12.7069
708	0.0667084	12.7136
709	0.067537	12.7202
710	0.0682769	12.7268
711	0.0690638	12.7335
712	0.0697982	12.7403
713	0.0705373	12.747
714	0.071263	12.7536
715	0.0719452	12.7602
716	0.0726736	12.7669
717	0.0733258	12.7735
718	0.0740515	12.7802
719	0.0746555	12.7868
720	0.0753311	12.7936
721	0.0759259	12.8003
722	0.0765535	12.807
723	0.0771361	12.8136
724	0.0777271	12.8202
725	0.0783056	12.8269
726	0.0788314	12.8335
727	0.0793752	12.8401
728	0.0798457	12.8469
729	0.0803486	12.8536
730	0.0807661	12.8603
731	0.0812253	12.8669
732	0.0816186	12.8735
733	0.0820125	12.8802
734	0.082361	12.8868
735	0.0826956	12.8935
736	0.0830166	12.9002
737	0.0832953	12.907
738	0.0835684	12.9136
739	0.0837957	12.9202
740	0.0840457	12.9269
741	0.0842419	12.9335
742	0.0844483	12.9402
743	0.0846212	12.9468
744	0.0847837	12.9536
745	0.0849174	12.9603
746	0.0850282	12.9669
747	0.0851269	12.9736
748	0.0852104	12.9802
749	0.0852918	12.9868
750	0.0853402	12.9935
751	0.085368	13.0001
752	0.0853703	13.0069
753	0.0853607	13.0136
754	0.0853326	13.0203
755	0.0852906	13.0269
756	0.0852335	13.0335
757	0.085159	13.0402
758	0.0850653	13.0468
759	0.0849604	13.0534
760	0.0848183	13.0602
761	0.0846833	13.0669
762	0.0845072	13.0736
763	0.0843305	13.0802
764	0.0841259	13.0869
765	0.0839171	13.0935
766	0.0836881	13.1002
767	0.0834512	13.1068
768	0.0832085	13.1135
769	0.082936	13.1203
770	0.0826819	13.1269
771	0.0823832	13.1336
772	0.0821166	13.1402
773	0.0818057	13.1468
774	0.081512	13.1535
775	0.0811744	13.1601
776	0.0808448	13.1669
777	0.0804929	13.1736
778	0.080124	13.1803
779	0.0797591	13.1869
780	0.0793692	13.1935
781	0.0790151	13.2002
782	0.0785871	13.2068
783	0.0781946	13.2134
784	0.0777583	13.2202
785	0.0773677	13.2269
786	0.0769378	13.2336
787	0.0765209	13.2402
788	0.0760912	13.2469
789	0.0756483	13.2535
790	0.0752111	13.2601
791	0.0747307	13.2668
792	0.0743115	13.2735
793	0.073836	13.2803
794	0.0734066	13.2869
795	0.0729109	13.2935
796	0.0724603	13.3002
797	0.0719716	13.3068
798	0.0714981	13.3134
799	0.0710193	13.3201
800	0.0705299	13.3268
801	0.0700683	13.3336
802	0.069566	13.3402
803	0.0691163	13.3469
804	0.0686014	13.3535
805	0.0681538	13.3601
806	0.0676469	13.3668
807	0.0671838	13.3734
808	0.0666889	13.3801
809	0.0662113	13.3869
810	0.0657397	13.3936
811	0.065246	13.4002
812	0.0647857	13.4068
813	0.0642798	13.4135
814	0.0638399	13.4201
815	0.0633284	13.4267
816	0.0628841	13.4335
817	0.0624002	13.4402
818	0.0619588	13.4469
819	0.0614987	13.4535
820	0.0610448	13.4602
821	0.0606119	13.4668
822	0.0601428	13.4734
823	0.0597109	13.4801
824	0.0592301	13.4868
825	0.0588253	13.4936
826	0.0583625	13.5002
827	0.0579493	13.5069
828	0.0575023	13.5135
829	0.0570864	13.5201
830	0.0566681	13.5268
831	0.0562477	13.5334
832	0.0558663	13.5401
833	0.0554601	13.5469
834	0.0550987	13.5535
835	0.0546948	13.5602
836	0.0543537	13.5668
837	0.0539728	13.5735
838	0.053644	13.5801
839	0.0532942	13.5867
840	0.052964	13.5934
841	0.0526354	13.6002
842	0.0523062	13.6069
843	0.0520063	13.6135
844	0.0516964	13.6201
845	0.0514284	13.6268
846	0.0511288	13.6334
847	0.0508781	13.6401
848	0.0505934	13.6468
849	0.050344	13.6536
850	0.0500799	13.6602
851	0.0498368	13.6668
852	0.049601	13.6735
853	0.0493689	13.6801
854	0.0491493	13.6867
855	0.0489259	13.6934
856	0.0487381	13.7001
857	0.0485327	13.7069
858	0.0483655	13.7135
859	0.0481769	13.7202
860	0.0480183	13.7268
861	0.0478611	13.7334
862	0.0477164	13.7401
863	0.0475797	13.7467
864	0.0474506	13.7534
865	0.0473312	13.7602
866	0.0472076	13.7669
867	0.0471066	13.7735
868	0.0470025	13.7801
869	0.046928	13.7868
870	0.0468436	13.7934
871	0.0467695	13.8
872	0.0466989	13.8067
873	0.0466361	13.8135
874	0.0465736	13.8202
875	0.0465211	13.8268
876	0.0464816	13.8335
877	0.0464489	13.8401
878	0.0464261	13.8467
879	0.046418	13.8534
880	0.0464261	13.8601
881	0.046446	13.8669
882	0.0464753	13.8735
883	0.0465232	13.8802
884	0.0465857	13.8868
885	0.0466537	13.8934
886	0.0467344	13.9001
887	0.0468224	13.9067
888	0.0469236	13.9134
889	0.0470157	13.9202
890	0.0471289	13.9268
891	0.0472352	13.9335
892	0.0473531	13.9401
893	0.0474699	13.9467
894	0.0476135	13.9534
895	0.0477618	13.96
896	0.04791	13.9667
897	0.0480729	13.9735
898	0.0482354	13.9802
899	0.0484192	13.9868
900	0.0485857	13.9934
901	0.0488149	14.0001
902	0.0490369	14.0067
903	0.0492846	14.0134
904	0.0495131	14.02
905	0.049758	14.0269
906	0.0500165	14.0335
907	0.0502792	14.0401
908	0.0505702	14.0468
909	0.0508557	14.0534
910	0.0511865	14.06
911	0.0514617	14.0667
912	0.0517904	14.0733
913	0.0520977	14.0802
914	0.0524524	14.0868
915	0.0528021	14.0935
916	0.0531595	14.1001
917	0.0535361	14.1067
918	0.0539087	14.1134
919	0.0543154	14.12
920	0.0546936	14.1267
921	0.0551427	14.1335
922	0.0555466	14.1401
923	0.0560173	14.1468
924	0.0564518	14.1534
925	0.0569508	14.16
926	0.0574526	14.1667
927	0.057966	14.1733
928	0.0585048	14.18
929	0.0590357	14.1868
930	0.0596339	14.1935
931	0.0601786	14.2001
932	0.060828	14.2067
933	0.0614188	14.2134
934	0.0621153	14.22
935	0.0627646	14.2267
936	0.0634819	14.2333
937	0.0642139	14.2402
938	0.0649778	14.2468
939	0.0657989	14.2534
940	0.0665985	14.2601
941	0.0675083	14.2667
942	0.0683358	14.2734
943	0.0693244	14.28
944	0.0702223	14.2867
945	0.0712769	14.2935
946	0.0722947	14.3001
947	0.0733893	14.3068
948	0.074523	14.3134
949	0.075688	14.32
950	0.0769819	14.3267
951	0.0782302	14.3333
952	0.0797064	14.34
953	0.0810529	14.3468
954	0.0826846	14.3535
955	0.0841945	14.3601
956	0.0859412	14.3667
957	0.0876921	14.3734
958	0.0895631	14.38
959	0.0915591	14.3866
960	0.0935613	14.3933
961	0.095842	14.4002
962	0.0979863	14.4068
963	0.100589	14.4134
964	0.102961	14.4201
965	0.105827	14.4267
966	0.108562	14.4333
967	0.111645	14.44
968	0.114798	14.4466
969	0.118106	14.4535
970	0.121687	14.4601
971	0.125213	14.4667
972	0.129306	14.4734
973	0.13308	14.48
974	0.137675	14.4867
975	0.141887	14.4933
976	0.146837	14.5
977	0.151639	14.5068
978	0.156875	14.5134
979	0.162299	14.5201
980	0.167896	14.5267
981	0.174066	14.5334
982	0.179996	14.54
983	0.18691	14.5466
984	0.193164	14.5533
985	0.200706	14.5601
986	0.207627	14.5668
987	0.21553	14.5734
988	0.223286	14.58
989	0.231531	14.5867
990	0.240099	14.5933
991	0.248608	14.6
992	0.258034	14.6066
993	0.266816	14.6135
994	0.27716	14.6201
995	0.286396	14.6268
996	0.297237	14.6334
997	0.307303	14.64
998	0.318365	14.6467
999	0.329321	14.6533
1000	0.340558	14.66
1001	0.352368	14.6668
1002	0.363664	14.6734
1003	0.376305	14.6801
1004	0.387597	14.6867
1005	0.400843	14.6933
1006	0.412631	14.7
1007	0.425917	14.7066
1008	0.438434	14.7133
1009	0.451589	14.7201
1010	0.464785	14.7268
1011	0.47777	14.7334
1012	0.49167	14.74
1013	0.504451	14.7467
1014	0.518958	14.7533
1015	0.531588	14.7599
1016	0.546058	14.7666
1017	0.558963	14.7734
1018	0.573027	14.7801
1019	0.586381	14.7867
1020	0.599934	14.7934
1021	0.613614	14.8
1022	0.626556	14.8066
1023	0.640436	14.8133
1024	0.652782	14.8199
1025	0.666737	14.8268
1026	0.678816	14.8334
1027	0.692416	14.8401
1028	0.704486	14.8467
1029	0.717289	14.8533
1030	0.729403	14.86
1031	0.741505	14.8666
1032	0.753654	14.8732
1033	0.764955	14.8801
1034	0.776969	14.8867
1035	0.787517	14.8934
1036	0.799143	14.9
1037	0.809056	14.9066
1038	0.820103	14.9133
1039	0.829852	14.9199
1040	0.840039	14.9266
1041	0.849463	14.9334
1042	0.858695	14.9401
1043	0.867851	14.9467
1044	0.876242	14.9533
1045	0.884984	14.96
1046	0.892574	14.9666
1047	0.900893	14.9732
1048	0.907812	14.9799
1049	0.915357	14.9867
1050	0.92192	14.9934
1051	0.928603	15
1052	0.934782	15.0067
1053	0.940641	15.0133
1054	0.946375	15.0199
1055	0.951495	15.0266
1056	0.956788	15.0332
1057	0.961186	15.0401
1058	0.965955	15.0467
1059	0.969826	15.0534
1060	0.973824	15.06
1061	0.977292	15.0666
1062	0.980688	15.0733
1063	0.983735	15.0799
1064	0.986444	15.0865
1065	0.988956	15.0934
1066	0.99105	15.1
1067	0.993152	15.1067
1068	0.994724	15.1133
1069	0.996242	15.12
1070	0.997372	15.1266
1071	0.998371	15.1332
1072	0.999041	15.1399
1073	0.999578	15.1467
1074	0.999893	15.1534
1075	1	15.16
1076	0.999917	15.1667
1077	0.999633	15.1733
1078	0.999016	15.1799
1079	0.998314	15.1866
1080	0.997273	15.1932
1081	0.996179	15.2001
1082	0.99473	15.2067
1083	0.993187	15.2133
1084	0.99141	15.22
1085	0.989465	15.2266
1086	0.987333	15.2333
1087	0.984884	15.2399
1088	0.982515	15.2465
1089	0.979736	15.2534
1090	0.977191	15.26
1091	0.974016	15.2667
1092	0.971077	15.2733
1093	0.967657	15.28
1094	0.964297	15.2866
1095	0.960704	15.2932
1096	0.956983	15.2999
1097	0.953214	15.3067
1098	0.949093	15.3134
1099	0.945182	15.32
1100	0.940633	15.3266
1101	0.936603	15.3333
1102	0.931802	15.3399
1103	0.927415	15.3466
1104	0.922531	15.3532
1105	0.917759	15.3601
1106	0.912746	15.3667
1107	0.907641	15.3733
1108	0.902625	15.38
1109	0.897145	15.3866
1110	0.892096	15.3933
1111	0.886206	15.3999
1112	0.88102	15.4065
1113	0.875015	15.4134
1114	0.869476	15.42
1115	0.863425	15.4267
1116	0.857563	15.4333
1117	0.851563	15.4399
1118	0.845304	15.4466
1119	0.839287	15.4532
1120	0.832619	15.4598
1121	0.826681	15.4667
1122	0.819724	15.4733
1123	0.813555	15.48
1124	0.806641	15.4866
1125	0.80021	15.4933
1126	0.793315	15.4999
1127	0.786454	15.5065
1128	0.779657	15.5132
1129	0.772484	15.52
1130	0.765828	15.5267
1131	0.758275	15.5333
1132	0.751691	15.5399
1133	0.744021	15.5466
1134	0.7371	15.5532
1135	0.729476	15.5599
1136	0.72227	15.5665
1137	0.714835	15.5734
1138	0.707298	15.58
1139	0.699912	15.5866
1140	0.692007	15.5933
1141	0.684815	15.5999
1142	0.67667	15.6066
1143	0.669575	15.6132
1144	0.66139	15.6198
1145	0.654041	15.6267
1146	0.645992	15.6333
1147	0.638278	15.64
1148	0.630428	15.6466
1149	0.622517	15.6532
1150	0.614914	15.6599
1151	0.606741	15.6665
1152	0.599373	15.6731
1153	0.590954	15.68
1154	0.583637	15.6866
1155	0.575212	15.6933
1156	0.567665	15.6999
1157	0.559551	15.7066
1158	0.551732	15.7132
1159	0.543842	15.7198
1160	0.535778	15.7265
1161	0.528137	15.7333
1162	0.519799	15.74
1163	0.512418	15.7466
1164	0.504033	15.7532
1165	0.496766	15.7599
1166	0.488525	15.7665
1167	0.480997	15.7732
1168	0.473049	15.7798
1169	0.465364	15.7867
1170	0.45771	15.7933
1171	0.449838	15.8
1172	0.442468	15.8066
1173	0.434421	15.8132
1174	0.427319	15.8199
1175	0.419204	15.8265
1176	0.412162	15.8331
1177	0.404302	15.84
1178	0.397113	15.8466
1179	0.389578	15.8533
1180	0.382245	15.8599
1181	0.37503	15.8666
1182	0.367618	15.8732
1183	0.360785	15.8798
1184	0.353271	15.8865
1185	0.346776	15.8934
1186	0.339337	15.9
1187	0.332863	15.9066
1188	0.325747	15.9133
1189	0.319182	15.9199
1190	0.312421	15.9265
1191	0.305804	15.9332
1192	0.299422	15.9398
1193	0.292738	15.9467
1194	0.286706	15.9533
1195	0.280015	15.9599
1196	0.274322	15.9666
1197	0.267871	15.9732
1198	0.262202	15.9798
1199	0.256127	15.9865
1200	0.250493	15.9931
1201	0.244787	16
1202	0.239135	16.0066
1203	0.2338	16.0133
1204	0.228168	16.0199
1205	0.223166	16.0265
1206	0.217588	16.0332
1207	0.212828	16.0398
1208	0.207495	16.0464
1209	0.202757	16.0533
1210	0.197786	16.0599
1211	0.19312	16.0666
1212	0.188511	16.0732
1213	0.183892	16.0799
1214	0.17963	16.0865
1215	0.175096	16.0932
1216	0.17117	16.0998
1217	0.166763	16.1067
1218	0.163055	16.1133
1219	0.158916	16.1199
1220	0.155219	16.1266
1221	0.15139	16.1332
1222	0.14776	16.1398
1223	0.144226	16.1465
1224	0.140657	16.1531
1225	0.137421	16.16
1226	0.13395	16.1666
1227	0.130994	16.1733
1228	0.127677	16.1799
1229	0.124891	16.1865
1230	0.121841	16.1932
1231	0.119115	16.1998
1232	0.116332	16.2064
1233	0.113707	16.2133
1234	0.111188	16.2199
1235	0.108641	16.2266
1236	0.106332	16.2332
1237	0.103873	16.2399
1238	0.101801	16.2465
1239	0.099479	16.2531
1240	0.097516	16.2598
1241	0.0954239	16.2666
1242	0.0935482	16.2733
1243	0.0916531	16.2799
1244	0.0898577	16.2865
1245	0.0881691	16.2932
1246	0.0864716	16.2998
1247	0.0849565	16.3064
1248	0.0833168	16.3131
1249	0.0819689	16.32
1250	0.0804638	16.3266
1251	0.0791832	16.3332
1252	0.0778308	16.3399
1253	0.0766191	16.3465
1254	0.0754111	16.3531
1255	0.0742621	16.3598
1256	0.0732044	16.3664
1257	0.0721315	16.3733
1258	0.0712103	16.3799
1259	0.0702126	16.3866
1260	0.0693987	16.3932
1261	0.0685124	16.3998
1262	0.0677561	16.4065
1263	0.0669797	16.4131
1264	0.0662738	16.4197
1265	0.0655913	16.4266
1266	0.0649256	16.4332
1267	0.0643333	16.4399
1268	0.0637273	16.4465
1269	0.0632228	16.4532
1270	0.0626808	16.4598
1271	0.062236	16.4664
1272	0.0617634	16.4731
1273	0.0613675	16.4799
1274	0.060992	16.4866
1275	0.0606525	16.4932
1276	0.0603377	16.4998
1277	0.0600396	16.5065
1278	0.0597869	16.5131
1279	0.0595346	16.5198
1280	0.0593382	16.5264
1281	0.0591297	16.5333
1282	0.0589768	16.5399
1283	0.0588231	16.5465
1284	0.0586943	16.5532
1285	0.0585874	16.5598
1286	0.058515	16.5665
1287	0.0584648	16.5731
1288	0.0584318	16.5797
1289	0.0584194	16.5866
1290	0.0584363	16.5932
1291	0.0584804	16.5999
1292	0.0585502	16.6065
1293	0.0586355	16.6131
1294	0.0587497	16.6198
1295	0.0588817	16.6264
1296	0.0590452	16.6331
1297	0.0592228	16.6399
1298	0.0594137	16.6466
1299	0.0596501	16.6532
1300	0.0598844	16.6598
1301	0.0601775	16.6665
1302	0.0604604	16.6731
1303	0.0608097	16.6797
1304	0.061155	16.6864
1305	0.0615711	16.6933
1306	0.061995	16.6999
1307	0.0624671	16.7065
1308	0.0629832	16.7132
1309	0.0634971	16.7198
1310	0.0640873	16.7264
1311	0.0646488	16.7331
1312	0.0653336	16.7397
1313	0.0659738	16.7466
1314	0.0667309	16.7532
1315	0.0674431	16.7599
1316	0.0682339	16.7665
1317	0.0690398	16.7731
1318	0.0698972	16.7798
1319	0.0708422	16.7864
1320	0.0717777	16.793
1321	0.0728377	16.7999
1322	0.0738059	16.8065
1323	0.0749826	16.8132
1324	0.0760617	16.8198
1325	0.0773091	16.8265
1326	0.0785199	16.8331
1327	0.0798339	16.8397
1328	0.081169	16.8464
1329	0.0825072	16.8533
1330	0.0839691	16.8599
1331	0.0853719	16.8665
1332	0.0869989	16.8732
1333	0.0884468	16.8798
1334	0.0901679	16.8864
1335	0.0917491	16.8931
1336	0.0935317	16.8997
1337	0.0952534	16.9066
1338	0.0970626	16.9132
1339	0.0989217	16.9198
1340	0.100755	16.9265
1341	0.102738	16.9331
1342	0.10457	16.9398
1343	0.106673	16.9464
1344	0.108527	16.953
1345	0.110685	16.9599
1346	0.112632	16.9665
1347	0.114763	16.9732
1348	0.11681	16.9798
1349	0.118922	16.9864
1350	0.121056	16.9931
1351	0.123132	16.9997
1352	0.125354	17.0063
1353	0.127397	17.0132
1354	0.129676	17.0198
1355	0.131645	17.0265
1356	0.133922	17.0331
1357	0.135957	17.0398
1358	0.138164	17.0464
1359	0.140245	17.053
1360	0.142344	17.0597
1361	0.144453	17.0665
1362	0.14647	17.0732
1363	0.148589	17.0798
1364	0.150499	17.0865
1365	0.152625	17.0931
1366	0.154422	17.0997
1367	0.156439	17.1064
1368	0.158223	17.113
1369	0.160102	17.1199
1370	0.161877	17.1265
1371	0.163603	17.1331
1372	0.165315	17.1398
1373	0.166891	17.1464
1374	0.16855	17.153
1375	0.169984	17.1597
1376	0.171591	17.1663
1377	0.172939	17.1732
1378	0.174398	17.1798
1379	0.175682	17.1865
1380	0.176981	17.1931
1381	0.178203	17.1997
1382	0.179366	17.2064
1383	0.180508	17.213
1384	0.181525	17.2197
1385	0.182572	17.2265
1386	0.183412	17.2332
1387	0.184336	17.2398
1388	0.185086	17.2464
1389	0.185862	17.2531
1390	0.186521	17.2597
1391	0.18715	17.2663
1392	0.18771	17.273
1393	0.188211	17.2799
1394	0.188675	17.2865
1395	0.18906	17.2931
1396	0.189444	17.2998
1397	0.189717	17.3064
1398	0.189978	17.313
1399	0.190161	17.3197
1400	0.190303	17.3263
1401	0.190387	17.3332
1402	0.190421	17.3398
1403	0.190401	17.3465
1404	0.190348	17.3531
1405	0.190231	17.3597
1406	0.190071	17.3664
1407	0.189862	17.373
1408	0.189637	17.3796
1409	0.189324	17.3865
1410	0.189013	17.3932
1411	0.188635	17.3998
1412	0.188237	17.4064
1413	0.187793	17.4131
1414	0.187305	17.4197
1415	0.186818	17.4263
1416	0.18626	17.433
1417	0.185709	17.4398
1418	0.185062	17.4465
1419	0.184484	17.4531
1420	0.183796	17.4598
1421	0.183156	17.4664
1422	0.182442	17.473
1423	0.181741	17.4797
1424	0.181011	17.4863
1425	0.18024	17.4932
1426	0.179487	17.4998
1427	0.178652	17.5065
1428	0.177884	17.5131
1429	0.176979	17.5197
1430	0.176173	17.5264
1431	0.175255	17.533
1432	0.174402	17.5396
1433	0.17347	17.5465
1434	0.172562	17.5531
1435	0.171657	17.5598
1436	0.17072	17.5664
1437	0.169826	17.5731
1438	0.168846	17.5797
1439	0.167986	17.5863
1440	0.166988	17.593
1441	0.166099	17.5998
1442	0.165088	17.6065
1443	0.164166	17.6131
1444	0.163197	17.6198
1445	0.162231	17.6264
1446	0.161268	17.633
1447	0.160285	17.6397
1448	0.159375	17.6463
1449	0.158352	17.6532
1450	0.157462	17.6598
1451	0.156433	17.6664
1452	0.155541	17.6731
1453	0.15455	17.6797
1454	0.153619	17.6863
1455	0.152663	17.693
1456	0.151724	17.6996
1457	0.150797	17.7065
1458	0.14981	17.7131
1459	0.148922	17.7198
1460	0.147918	17.7264
1461	0.147054	17.733
1462	0.146075	17.7397
1463	0.145207	17.7463
1464	0.144261	17.7529
1465	0.143376	17.7598
1466	0.142485	17.7664
1467	0.141596	17.7731
1468	0.140747	17.7797
1469	0.13986	17.7864
1470	0.139084	17.793
1471	0.1382	17.7996
1472	0.137436	17.8063
1473	0.136579	17.8131
1474	0.135816	17.8198
1475	0.134989	17.8264
1476	0.134196	17.8331
1477	0.133407	17.8397
1478	0.132618	17.8463
1479	0.13187	17.853
1480	0.131057	17.8596
1481	0.130353	17.8665
1482	0.129566	17.8731
1483	0.128887	17.8797
1484	0.128139	17.8864
1485	0.127477	17.893
1486	0.126788	17.8996
1487	0.126118	17.9063
1488	0.125447	17.9129
1489	0.124753	17.9198
1490	0.124119	17.9264
1491	0.123421	17.9331
1492	0.122809	17.9397
1493	0.122104	17.9463
1494	0.121483	17.953
1495	0.120787	17.9596
1496	0.120145	17.9662
1497	0.119498	17.9731
1498	0.118873	17.9797
1499	0.118268	17.9864
1500	0.117636	17.993
1501	0.117064	17.9997
1502	0.116427	18.0063
1503	0.115882	18.0129
1504	0.115237	18.0196
1505	0.114677	18.0264
1506	0.114074	18.0331
1507	0.113499	18.0397
1508	0.112911	18.0464
1509	0.112319	18.053
1510	0.111748	18.0596
1511	0.11114	18.0663
1512	0.110594	18.0729
1513	0.109965	18.0798
1514	0.109442	18.0864
1515	0.10884	18.093
1516	0.108295	18.0997
1517	0.107716	18.1063
1518	0.107165	18.113
1519	0.106612	18.1196
1520	0.106051	18.1262
1521	0.105516	18.1331
1522	0.104925	18.1398
1523	0.104408	18.1464
1524	0.103808	18.153
1525	0.103285	18.1597
1526	0.102675	18.1663
1527	0.102121	18.1729
1528	0.101535	18.1796
1529	0.100972	18.1864
1530	0.100393	18.1931
1531	0.0998139	18.1997
1532	0.0992755	18.2064
1533	0.0986865	18.213
1534	0.0981633	18.2196
1535	0.0975873	18.2263
1536	0.0971007	18.2329
1537	0.096534	18.2398
1538	0.0960125	18.2464
1539	0.0954476	18.253
1540	0.0949168	18.2597
1541	0.0943761	18.2663
1542	0.0938159	18.273
1543	0.0932944	18.2796
1544	0.0927328	18.2862
1545	0.0922196	18.2931
1546	0.0916334	18.2997
1547	0.0911287	18.3064
1548	0.0905735	18.313
1549	0.0900771	18.3197
1550	0.089556	18.3263
1551	0.0890444	18.3329
1552	0.0885312	18.3396
1553	0.0880051	18.3464
1554	0.0875173	18.3531
1555	0.0869787	18.3597
1556	0.0865057	18.3663
1557	0.0859611	18.373
1558	0.0854774	18.3796
1559	0.0849273	18.3863
1560	0.0844205	18.3929
1561	0.0839046	18.3998
1562	0.0834109	18.4064
1563	0.0829193	18.413
1564	0.0824138	18.4197
1565	0.0819521	18.4263
1566	0.0814418	18.4329
1567	0.0809994	18.4396
1568	0.0804936	18.4462
1569	0.0800635	18.4531
1570	0.079593	18.4597
1571	0.0791522	18.4664
1572	0.0786988	18.473
1573	0.0782568	18.4796
1574	0.0778209	18.4863
1575	0.0773636	18.4929
1576	0.0769517	18.4995
1577	0.07649	18.5064
1578	0.0760922	18.513
1579	0.0756439	18.5197
1580	0.0752447	18.5263
1581	0.074805	18.5329
1582	0.0743971	18.5396
1583	0.0739881	18.5462
1584	0.0735862	18.5529
1585	0.0732028	18.5597
1586	0.0727958	18.5664
1587	0.0724352	18.573
1588	0.0720307	18.5796
1589	0.0716777	18.5863
1590	0.0712731	18.5929
1591	0.0709172	18.5996
1592	0.070523	18.6062
1593	0.07015	18.6131
1594	0.0697832	18.6197
1595	0.06941	18.6263
1596	0.0690579	18.633
1597	0.0686884	18.6396
1598	0.0683638	18.6462
1599	0.0679903	18.6529
1600	0.0676696	18.6595
1601	0.0673111	18.6664
1602	0.0669962	18.673
1603	0.0666559	18.6796
1604	0.0663152	18.6863
1605	0.0659758	18.6929
1606	0.0656339	18.6996
1607	0.0653103	18.7062
1608	0.0649559	18.7128
1609	0.0646487	18.7197
1610	0.0643064	18.7263
1611	0.0640112	18.733
1612	0.0636902	18.7396
1613	0.0633965	18.7463
1614	0.0630867	18.7529
1615	0.0627974	18.7595
1616	0.062518	18.7662
1617	0.062225	18.773
1618	0.061957	18.7797
1619	0.0616595	18.7863
1620	0.061399	18.793
1621	0.0610953	18.7996
1622	0.0608244	18.8062
1623	0.060525	18.8129
1624	0.0602629	18.8195
1625	0.0600008	18.8264
1626	0.0597372	18.833
1627	0.0594868	18.8396
1628	0.0592239	18.8463
1629	0.0589908	18.8529
1630	0.0587237	18.8596
1631	0.0584987	18.8662
1632	0.0582419	18.8728
1633	0.0580228	18.8797
1634	0.0577816	18.8864
1635	0.0575403	18.893
1636	0.0572896	18.8996
1637	0.0570352	18.9063
1638	0.0567916	18.9129
1639	0.0565456	18.9195
1640	0.0563369	18.9262
1641	0.056087	18.933
1642	0.0558699	18.9397
1643	0.0556332	18.9463
1644	0.0554196	18.953
1645	0.0551979	18.9596
1646	0.0549916	18.9662
1647	0.0547848	18.9728
1648	0.0545781	18.9795
1649	0.0543724	18.9864
1650	0.0541496	18.993
1651	0.0539692	18.9996
1652	0.0537588	19.0063
1653	0.0535705	19.0129
1654	0.053357	19.0195
1655	0.0531608	19.0262
1656	0.0529586	19.0328
1657	0.0527664	19.0397
1658	0.0525773	19.0463
1659	0.0523878	19.0529
1660	0.0522131	19.0596
1661	0.0520159	19.0662
1662	0.0518502	19.0729
1663	0.0516568	19.0795
1664	0.0514908	19.0862
1665	0.0513048	19.093
1666	0.0511321	19.0997
1667	0.0509571	19.1063
1668	0.0507815	19.1129
1669	0.050604	19.1196
1670	0.05042	19.1262
1671	0.0502594	19.1329
1672	0.0500801	19.1395
1673	0.0499293	19.1463
1674	0.0497613	19.153
1675	0.0496172	19.1596
1676	0.0494626	19.1663
1677	0.0493161	19.1729
1678	0.0491711	19.1795
1679	0.0490297	19.1862
1680	0.0488896	19.1928
1681	0.048737	19.1997
1682	0.0486007	19.2063
1683	0.0484584	19.2129
1684	0.0483371	19.2196
1685	0.0481829	19.2262
1686	0.0480454	19.2329
1687	0.0479036	19.2395
1688	0.0477684	19.2461
1689	0.0476299	19.253
1690	0.047497	19.2596
1691	0.0473768	19.2663
1692	0.047242	19.2729
1693	0.0471101	19.2795
1694	0.046957	19.2862
1695	0.0468379	19.2928
1696	0.0467005	19.2994
1697	0.0465704	19.3063
1698	0.0464297	19.313
1699	0.0462954	19.3196
1700	0.0461544	19.3262
1701	0.0460085	19.3329
1702	0.0458789	19.3395
1703	0.0457398	19.3461
1704	0.0456196	19.3528
1705	0.0454941	19.3596
1706	0.0453866	19.3663
1707	0.0452643	19.3729
1708	0.0451553	19.3796
1709	0.0450404	19.3862
1710	0.0449321	19.3928
1711	0.0448259	19.3995
1712	0.0447134	19.4061
1713	0.0446109	19.413
1714	0.044499	19.4196
1715	0.0443932	19.4262
1716	0.0442651	19.4329
1717	0.0441572	19.4395
1718	0.0440534	19.4461
1719	0.043957	19.4528
1720	0.0438471	19.4594
1721	0.0437416	19.4663
1722	0.0436447	19.4729
1723	0.0435443	19.4796
1724	0.0434526	19.4862
1725	0.0433414	19.4928
1726	0.043252	19.4995
1727	0.0431522	19.5061
1728	0.0430531	19.5128
1729	0.0429486	19.5196
1730	0.042862	19.5263
1731	0.0427729	19.5329
1732	0.042681	19.5395
1733	0.0425928	19.5462
1734	0.0425023	19.5528
1735	0.0424308	19.5595
1736	0.0423498	19.5661
1737	0.0422784	19.573
1738	0.0422015	19.5796
1739	0.0421349	19.5862
1740	0.0420519	19.5929
1741	0.0419727	19.5995
1742	0.0418951	19.6061
1743	0.0418157	19.6128
1744	0.0417368	19.6194
1745	0.0416531	19.6263
1746	0.0415798	19.6329
1747	0.0414926	19.6396
1748	0.0414109	19.6462
1749	0.0413212	19.6528
1750	0.041248	19.6595
1751	0.0411657	19.6661
1752	0.0410844	19.6728
1753	0.0410042	19.6796
1754	0.0409206	19.6862
1755	0.0408371	19.6929
1756	0.0407538	19.6995
1757	0.0406854	19.7062
1758	0.040615	19.7128
1759	0.0405554	19.7194
1760	0.0404856	19.7261
1761	0.0404201	19.7329
1762	0.0403381	19.7396
1763	0.0402612	19.7462
1764	0.0401921	19.7529
1765	0.0401178	19.7595
1766	0.0400396	19.7661
1767	0.0399423	19.7728
1768	0.0398453	19.7794
1769	0.0397513	19.7863
1770	0.0396667	19.7929
1771	0.039571	19.7995
1772	0.0394906	19.8062
1773	0.0394015	19.8128
1774	0.0393114	19.8195
1775	0.0392304	19.8261
1776	0.0391483	19.8327
1777	0.0390826	19.8396
1778	0.0390013	19.8462
1779	0.0389142	19.8529
1780	0.0388032	19.8595
1781	0.038708	19.8662
1782	0.038608	19.8728
1783	0.0385115	19.8794
1784	0.0384072	19.8861
1785	0.0383054	19.8929
1786	0.0382108	19.8996
1787	0.0380992	19.9062
1788	0.0379997	19.9129
1789	0.0378868	19.9195
1790	0.037799	19.9261
1791	0.0377009	19.9327
1792	0.0376081	19.9394
1793	0.0375063	19.9463
1794	0.0374097	19.9529
1795	0.0373058	19.9595
1796	0.0371929	19.9662
1797	0.0370942	19.9728
1798	0.0369822	19.9794
1799	0.036882	19.9861
1800	0.0367737	19.9927
1801	0.0366765	19.9996
1802	0.0365718	20.0062
1803	0.0364755	20.0129
1804	0.0363676	20.0195
1805	0.0362617	20.0261
1806	0.036159	20.0328
1807	0.0360525	20.0394
1808	0.035962	20.046
1809	0.0358631	20.0529
1810	0.0357727	20.0595
1811	0.0356598	20.0662
1812	0.0355585	20.0728
1813	0.035456	20.0795
1814	0.0353656	20.0861
1815	0.0352699	20.0927
1816	0.0351742	20.0994
1817	0.035082	20.1062
1818	0.0349905	20.1129
1819	0.0349111	20.1195
1820	0.034805	20.1261
1821	0.0347182	20.1328
1822	0.0346235	20.1394
1823	0.0345343	20.1461
1824	0.0344335	20.1527
1825	0.0343393	20.1596
1826	0.0342427	20.1662
1827	0.0341417	20.1728
1828	0.0340364	20.1795
1829	0.0339211	20.1861
1830	0.033831	20.1928
1831	0.0337164	20.1994
1832	0.0336068	20.206
1833	0.0334817	20.2129
1834	0.0333695	20.2195
1835	0.0332481	20.2262
1836	0.0331283	20.2328
1837	0.0330092	20.2394
1838	0.0328891	20.2461
1839	0.0327746	20.2527
1840	0.0326306	20.2594
1841	0.0325073	20.2662
1842	0.0323788	20.2729
1843	0.0322655	20.2795
1844	0.0321306	20.2861
1845	0.0320027	20.2928
1846	0.0318643	20.2994
1847	0.0317257	20.3061
1848	0.0315852	20.3127
1849	0.0314268	20.3196
1850	0.0312898	20.3262
1851	0.0311449	20.3328
1852	0.0310068	20.3395
1853	0.0308393	20.3461
1854	0.0306949	20.3527
1855	0.0305418	20.3594
1856	0.030395	20.366
1857	0.0302359	20.3729
1858	0.030075	20.3795
1859	0.029926	20.3862
1860	0.0297668	20.3928
1861	0.0296142	20.3994
1862	0.0294391	20.4061
1863	0.0292927	20.4127
1864	0.0291175	20.4193
1865	0.0289508	20.4262
1866	0.0287673	20.4328
1867	0.0285951	20.4395
1868	0.0284191	20.4461
1869	0.0282354	20.4528
1870	0.0280598	20.4594
1871	0.0278711	20.466
1872	0.0277007	20.4727
1873	0.0275035	20.4795
1874	0.0273328	20.4862
1875	0.0271419	20.4928
1876	0.0269724	20.4995
1877	0.0267962	20.5061
1878	0.0266199	20.5127
1879	0.0264431	20.5194
1880	0.0262629	20.526
1881	0.0260952	20.5329
1882	0.0259094	20.5395
1883	0.0257493	20.5461
1884	0.0255657	20.5528
1885	0.0254045	20.5594
1886	0.0252219	20.5661
1887	0.025051	20.5727
1888	0.0248845	20.5754
1889	0.0247201	20.5776
1890	0.0245553	20.5813
1891	0.0243885	20.587
1892	0.0242412	20.5936
1893	0.0240869	20.6003
1894	0.0239578	20.6069
1895	0.0237827	20.6135
1896	0.0236319	20.6202
1897	0.0234738	20.6268
1898	0.0233325	20.6334
1899	0.0232154	20.6403
1900	0.0231071	20.6469
1901	0.023005	20.6536
1902	0.0228965	20.6602
1903	0.0227962	20.6669
1904	0.0226725	20.6735
1905	0.0225947	20.6801
1906	0.0224843	20.6868
1907	0.0223845	20.6936
1908	0.0222693	20.7003
1909	0.0221335	20.7069
1910	0.0219866	20.7135
1911	0.0218341	20.7202
1912	0.0216857	20.7268
1913	0.0215263	20.7335
1914	0.0213901	20.7401
1915	0.021256	20.747
1916	0.0211544	20.7536
1917	0.0210318	20.7602
1918	0.020916	20.7669
1919	0.0208047	20.7735
1920	0.0207049	20.7801
1921	0.0206075	20.7868
1922	0.0205021	20.7934
1923	0.0204047	20.8003
1924	0.0202968	20.8069
1925	0.0201896	20.8136
1926	0.0200796	20.8202
1927	0.0199885	20.8268
1928	0.019876	20.8335
1929	0.0197705	20.8401
1930	0.0196682	20.8467
1931	0.0195625	20.8536
1932	0.0194594	20.8602
1933	0.0193539	20.8669
1934	0.0192583	20.8735
1935	0.0191621	20.8802
1936	0.0190721	20.8868
1937	0.01897	20.8934
1938	0.0188919	20.9001
1939	0.0188067	20.9069
1940	0.0187214	20.9136
1941	0.0186375	20.9202
1942	0.0185572	20.9268
1943	0.0184776	20.9335
1944	0.0183975	20.9401
1945	0.0183188	20.9468
1946	0.0182263	20.9534
1947	0.0181498	20.9603
1948	0.0180861	20.9669
1949	0.0180275	20.9735
1950	0.0179534	20.9802
1951	0.0178903	20.9868
1952	0.0178349	20.9934
1953	0.0177823	21.0001
1954	0.0177291	21.0067
1955	0.0176754	21.0136
1956	0.0176351	21.0202
1957	0.0175837	21.0269
1958	0.0175204	21.0335
1959	0.0174613	21.0401
1960	0.017425	21.0468
1961	0.017393	21.0534
1962	0.0173631	21.0601
1963	0.0173404	21.0669
1964	0.0173204	21.0736
1965	0.0173012	21.0802
1966	0.0172857	21.0868
1967	0.017284	21.0935
1968	0.0172929	21.1001
1969	0.0173055	21.1068
1970	0.0173369	21.1134
1971	0.0173722	21.1203
1972	0.0174255	21.1269
1973	0.0174933	21.1335
1974	0.0175826	21.1402
1975	0.0176995	21.1468
1976	0.0178321	21.1535
1977	0.0180061	21.1601
1978	0.0181843	21.1667
1979	0.0184259	21.1736
1980	0.0186637	21.1802
1981	0.0189787	21.1869
1982	0.0193113	21.1935
1983	0.0197124	21.2001
1984	0.0201659	21.2068
1985	0.0206703	21.2134
1986	0.0212614	21.22
1987	0.0218644	21.2269
1988	0.022599	21.2335
1989	0.0232994	21.2402
1990	0.0241459	21.2468
1991	0.0249362	21.2535
1992	0.0258185	21.2601
1993	0.0266771	21.2667
1994	0.0275799	21.2734
1995	0.0284808	21.2802
1996	0.0293512	21.2869
1997	0.0302889	21.2935
1998	0.0311389	21.3001
[truncated: 104 more rows]
