# Supplementary material for: Design of amyloidogenic peptide traps
Source: Nat Chem Biol. 2024 Mar 19;20(8):981–90. doi: 10.1038/s41589-024-01578-5 (PMC11288891; doi:10.1038/s41589-024-01578-5)
Supplement: Supplementary file 14 — Statistical source data. [file 41589_2024_1578_MOESM14_ESM.xlsx]

## Sheet: Extended Data Fig. 4c
AuCCC104-2	uv 230	vol 230	CCC104-2	uv 230	vol 230	complex	uv 230	vol 230
0	0.000280282	8.0063	0	0.001187	8.00219	0	0.000256	8.00203
1	0.000369601	8.01294	1	0.001182	8.00883	1	0.000253	8.00867
2	0.000448352	8.01958	2	0.001185	8.01547	2	0.000269	8.01531
3	0.000496109	8.02622	3	0.001112	8.02209	3	0.000288	8.02194
4	0.000511541	8.03119	4	0.001027	8.02873	4	0.000299	8.02858
5	0.000510809	8.03326	5	0.000994	8.03187	5	0.000305	8.03263
6	0.000538156	8.03618	6	0.000969	8.03407	6	0.000312	8.03473
7	0.000557181	8.04082	7	0.000909	8.03768	7	0.000327	8.038
8	0.000518959	8.04709	8	0.000847	8.04302	8	0.000331	8.04299
9	0.000390225	8.05397	9	0.000748	8.04983	9	0.000323	8.04953
10	0.000228516	8.0606	10	0.000641	8.05647	10	0.000313	8.05632
11	0.000110758	8.06724	11	0.000487	8.06311	11	0.000307	8.06295
12	2.72199e-05	8.07387	12	0.000335	8.06975	12	0.000293	8.06959
13	1.00753e-05	8.08051	13	0.000304	8.07638	13	0.000271	8.07623
14	0	8.08715	14	0.000285	8.08302	14	0.000259	8.08285
15	4.1505e-05	8.09379	15	0.000226	8.08966	15	0.000254	8.08949
16	9.78083e-05	8.10042	16	0.000178	8.0963	16	0.000237	8.09613
17	0.000178647	8.10729	17	0.000183	8.10316	17	0.000204	8.10283
18	0.00027373	8.11392	18	0.00019	8.10979	18	0.000183	8.10964
19	0.000413186	8.12056	19	0.000208	8.11643	19	0.000173	8.11628
20	0.000538698	8.1272	20	0.000205	8.12307	20	0.000161	8.12291
21	0.000607245	8.13384	21	0.000243	8.1297	21	0.000157	8.12955
22	0.000686075	8.14048	22	0.000313	8.13634	22	0.000157	8.13619
23	0.000711367	8.14712	23	0.000349	8.14298	23	0.000182	8.14283
24	0.000714635	8.15375	24	0.000376	8.14962	24	0.00021	8.14946
25	0.000687717	8.16062	25	0.000382	8.15649	25	0.000209	8.15615
26	0.0006744	8.16726	26	0.000397	8.16313	26	0.000202	8.16296
27	0.000650765	8.1739	27	0.000419	8.16977	27	0.000218	8.16959
28	0.000607105	8.18053	28	0.000499	8.1764	28	0.000241	8.17623
29	0.000597662	8.18717	29	0.000608	8.18304	29	0.000261	8.18287
30	0.000637273	8.19381	30	0.000714	8.18968	30	0.000277	8.18951
31	0.000662278	8.20044	31	0.000803	8.19632	31	0.000285	8.19615
32	0.000680278	8.20708	32	0.000832	8.20295	32	0.000298	8.20278
33	0.000715562	8.21395	33	0.000857	8.20982	33	0.000285	8.20947
34	0.000735464	8.22058	34	0.000896	8.21645	34	0.000262	8.21629
35	0.000742828	8.22722	35	0.000932	8.22309	35	0.000279	8.22293
36	0.000704974	8.23386	36	0.000979	8.22973	36	0.000331	8.22957
37	0.000676455	8.24051	37	0.001024	8.23635	37	0.000351	8.23621
38	0.000714939	8.24715	38	0.00103	8.24299	38	0.000329	8.24285
39	0.000742978	8.25378	39	0.001045	8.24963	39	0.000316	8.24948
40	0.000681956	8.26042	40	0.001106	8.25626	40	0.000314	8.25612
41	0.000611038	8.26729	41	0.001177	8.26313	41	0.000308	8.26279
42	0.000521975	8.27393	42	0.001277	8.26977	42	0.00028	8.26962
43	0.000432301	8.28057	43	0.001374	8.27641	43	0.000258	8.27625
44	0.000396791	8.2872	44	0.001446	8.28304	44	0.000263	8.28289
45	0.000370254	8.29384	45	0.001496	8.28968	45	0.000253	8.28953
46	0.00033085	8.30048	46	0.001501	8.29633	46	0.000193	8.29617
47	0.000261922	8.30712	47	0.00146	8.30296	47	0.000144	8.3028
48	0.000173988	8.31376	48	0.001408	8.30959	48	0.000151	8.30944
49	0.000115011	8.32062	49	0.001376	8.31646	49	0.000162	8.31611
50	0.000114754	8.32725	50	0.001327	8.32309	50	0.000156	8.32295
51	0.000143242	8.33389	51	0.001257	8.32973	51	0.000147	8.32959
52	0.000193973	8.34053	52	0.001191	8.33637	52	0.000155	8.33623
53	0.000266608	8.34715	53	0.001092	8.34302	53	0.000161	8.34286
54	0.000310621	8.35379	54	0.001004	8.34966	54	0.00015	8.3495
55	0.000310182	8.36043	55	0.000929	8.35629	55	0.00014	8.35614
56	0.000352182	8.36707	56	0.000871	8.36293	56	0.000151	8.36278
57	0.000431305	8.37394	57	0.000862	8.3698	57	0.000163	8.36944
58	0.000487374	8.38058	58	0.000846	8.37644	58	0.000145	8.37627
59	0.0005904	8.38721	59	0.000779	8.38308	59	0.000111	8.38291
60	0.000682362	8.39386	60	0.000703	8.38972	60	8.45e-05	8.38955
61	0.000646256	8.40048	61	0.000606	8.39635	61	6.22e-05	8.39618
62	0.000595856	8.40713	62	0.000492	8.40299	62	4.31e-05	8.40282
63	0.000563034	8.41376	63	0.000459	8.40962	63	3.11e-05	8.40946
64	0.000548042	8.4204	64	0.00046	8.41626	64	1.81e-05	8.4161
65	0.000542434	8.42726	65	0.000444	8.42313	65	6.8e-06	8.42276
66	0.00052501	8.43389	66	0.000409	8.42976	66	0	8.42961
67	0.000547699	8.44053	67	0.000383	8.4364	67	9.66e-06	8.43625
68	0.00058986	8.44717	68	0.000387	8.44304	68	2.7e-05	8.44289
69	0.00053851	8.45381	69	0.000406	8.44968	69	3.75e-05	8.44952
70	0.000477387	8.46044	70	0.000415	8.45632	70	4.75e-05	8.45615
71	0.000526982	8.46708	71	0.000455	8.46295	71	7.55e-05	8.46279
72	0.000586008	8.47373	72	0.000508	8.46959	72	0.000103	8.46943
73	0.00061932	8.48059	73	0.000524	8.47646	73	0.000123	8.47609
74	0.00065854	8.48723	74	0.000529	8.4831	74	0.000143	8.48293
75	0.000719092	8.49387	75	0.000553	8.48974	75	0.000144	8.48957
76	0.00078202	8.50051	76	0.000584	8.49638	76	0.000139	8.4962
77	0.000828438	8.50714	77	0.000599	8.50301	77	0.000135	8.50285
78	0.000916586	8.51378	78	0.000698	8.50965	78	0.000136	8.50948
79	0.00101775	8.52042	79	0.000806	8.51628	79	0.00015	8.51612
80	0.00112717	8.52705	80	0.0008	8.52292	80	0.000162	8.52275
81	0.00122404	8.53392	81	0.000791	8.52979	81	0.000162	8.52941
82	0.0012775	8.54055	82	0.000843	8.53641	82	0.000165	8.53626
83	0.00132766	8.54719	83	0.000896	8.54306	83	0.000167	8.5429
84	0.00141722	8.55383	84	0.000957	8.54969	84	0.000166	8.54954
85	0.00151027	8.56047	85	0.001029	8.55632	85	0.000188	8.55618
86	0.00158027	8.5671	86	0.001076	8.56296	86	0.000225	8.56281
87	0.00161906	8.57374	87	0.001104	8.5696	87	0.000253	8.56945
88	0.00157755	8.58038	88	0.001023	8.57623	88	0.000281	8.57609
89	0.00153593	8.58725	89	0.000946	8.5831	89	0.000305	8.58273
90	0.00141018	8.59389	90	0.001003	8.58974	90	0.000313	8.58959
91	0.00128513	8.60053	91	0.001066	8.59638	91	0.000311	8.59622
92	0.0012071	8.60716	92	0.001065	8.60302	92	0.000297	8.60286
93	0.00112523	8.6138	93	0.001053	8.60966	93	0.000289	8.6095
94	0.0010131	8.62044	94	0.001033	8.61629	94	0.000304	8.61614
95	0.000910672	8.62707	95	0.001032	8.62293	95	0.000317	8.62278
96	0.000842764	8.63371	96	0.001064	8.62956	96	0.000349	8.62941
97	0.000776763	8.64057	97	0.001104	8.63643	97	0.000375	8.63606
98	0.000691273	8.64721	98	0.00113	8.64306	98	0.000364	8.64292
99	0.000580051	8.65384	99	0.001128	8.6497	99	0.000363	8.64956
100	0.000561018	8.66049	100	0.001123	8.65634	100	0.00039	8.6562
101	0.000558579	8.66712	101	0.001093	8.66299	101	0.000419	8.66283
102	0.000571576	8.67376	102	0.00107	8.66964	102	0.000454	8.66947
103	0.000612406	8.6804	103	0.001042	8.67628	103	0.000483	8.6761
104	0.00063606	8.68704	104	0.00099	8.68291	104	0.000517	8.68274
105	0.000660012	8.69391	105	0.000941	8.68978	105	0.000551	8.68939
106	0.000687401	8.70054	106	0.0009	8.69643	106	0.000542	8.69624
107	0.000733207	8.70718	107	0.000845	8.70307	107	0.000531	8.70288
108	0.000806301	8.71382	108	0.000791	8.7097	108	0.000543	8.70952
109	0.000883716	8.72046	109	0.000756	8.71636	109	0.000553	8.71616
110	0.000956316	8.72709	110	0.000722	8.72297	110	0.00053	8.72281
111	0.00104159	8.73373	111	0.000717	8.72961	111	0.000493	8.72944
112	0.0011053	8.74037	112	0.000716	8.73625	112	0.000477	8.73608
113	0.00110235	8.74723	113	0.00074	8.74311	113	0.000482	8.74272
114	0.00109337	8.75386	114	0.000782	8.74974	114	0.000461	8.74959
115	0.00113469	8.7605	115	0.000791	8.75638	115	0.00043	8.75623
116	0.00117691	8.76714	116	0.000793	8.76302	116	0.00041	8.76286
117	0.00112744	8.77378	117	0.000799	8.76965	117	0.000391	8.76951
118	0.00106632	8.78042	118	0.000776	8.77628	118	0.000377	8.77614
119	0.00104308	8.78705	119	0.000768	8.78292	119	0.000368	8.78278
120	0.00102429	8.79369	120	0.000816	8.78956	120	0.000384	8.78941
121	0.000977024	8.80057	121	0.000856	8.79643	121	0.000424	8.79605
122	0.000925267	8.8072	122	0.000862	8.80307	122	0.000442	8.80291
123	0.000914422	8.81384	123	0.000854	8.80971	123	0.000408	8.80955
124	0.000907788	8.82048	124	0.000877	8.81634	124	0.000376	8.81619
125	0.000852131	8.82711	125	0.000903	8.82298	125	0.000359	8.82282
126	0.000801154	8.83375	126	0.000886	8.82962	126	0.000345	8.82945
127	0.000789819	8.84038	127	0.000883	8.83626	127	0.000331	8.83609
128	0.00074455	8.84702	128	0.000857	8.84289	128	0.000317	8.84272
129	0.000677107	8.85389	129	0.000816	8.84975	129	0.000301	8.84936
130	0.000583545	8.86052	130	0.000757	8.85639	130	0.000284	8.85624
131	0.000513207	8.86716	131	0.000712	8.86303	131	0.000282	8.86288
132	0.000536426	8.8738	132	0.000718	8.86967	132	0.000289	8.86951
133	0.000554698	8.88044	133	0.00073	8.8763	133	0.000327	8.87615
134	0.000547771	8.88708	134	0.000714	8.88294	134	0.000364	8.88278
135	0.000530842	8.89371	135	0.000709	8.88958	135	0.000387	8.88942
136	0.000459226	8.90035	136	0.000723	8.89621	136	0.000406	8.89606
137	0.000416668	8.90722	137	0.000719	8.90309	137	0.000421	8.90269
138	0.000436585	8.91386	138	0.000755	8.90972	138	0.000424	8.90956
139	0.000464542	8.9205	139	0.000774	8.91637	139	0.000433	8.91619
140	0.000565068	8.92714	140	0.000782	8.923	140	0.000455	8.92283
141	0.000665937	8.93377	141	0.000829	8.92964	141	0.000453	8.92947
142	0.000663093	8.9404	142	0.000836	8.93627	142	0.000451	8.93611
143	0.000654909	8.94705	143	0.000773	8.94291	143	0.000445	8.94274
144	0.000662651	8.95368	144	0.000689	8.94955	144	0.000408	8.94938
145	0.000666992	8.96055	145	0.000583	8.95641	145	0.000375	8.95602
146	0.000746715	8.96718	146	0.000514	8.96304	146	0.000348	8.96289
147	0.0008514	8.97382	147	0.000524	8.96968	147	0.000329	8.96953
148	0.000935693	8.98045	148	0.000552	8.97632	148	0.000344	8.97616
149	0.00100686	8.9871	149	0.000595	8.98296	149	0.000354	8.98281
150	0.00101818	8.99374	150	0.000613	8.98958	150	0.000335	8.98944
151	0.00100179	9.00038	151	0.000544	8.99622	151	0.000313	8.99608
152	0.0010078	9.00702	152	0.000489	9.00286	152	0.000314	9.00271
153	0.00104755	9.01389	153	0.000503	9.00973	153	0.000326	9.00935
154	0.00109885	9.02053	154	0.000519	9.01637	154	0.00036	9.01621
155	0.00117948	9.02717	155	0.000592	9.023	155	0.000391	9.02285
156	0.00121415	9.0338	156	0.000667	9.02964	156	0.000411	9.02949
157	0.00108224	9.04044	157	0.000677	9.03628	157	0.000427	9.03613
158	0.000965437	9.04708	158	0.000686	9.04292	158	0.000431	9.04276
159	0.000989681	9.05371	159	0.000696	9.04955	159	0.000443	9.0494
160	0.00102116	9.06035	160	0.000703	9.05619	160	0.000465	9.05604
161	0.00107023	9.06721	161	0.000739	9.06306	161	0.000485	9.06268
162	0.00111184	9.07385	162	0.000774	9.06969	162	0.000471	9.06954
163	0.00117119	9.08048	163	0.000795	9.07632	163	0.000444	9.07619
164	0.0012342	9.08712	164	0.00081	9.08297	164	0.00043	9.08282
165	0.00129036	9.09375	165	0.00076	9.08961	165	0.000428	9.08946
166	0.00136891	9.10039	166	0.000679	9.09626	166	0.000435	9.09609
167	0.00155724	9.10703	167	0.00061	9.10289	167	0.000448	9.10273
168	0.00171306	9.11366	168	0.000553	9.10952	168	0.000452	9.10937
169	0.00174415	9.12053	169	0.000509	9.1164	169	0.000464	9.116
170	0.00177981	9.12717	170	0.000489	9.12304	170	0.00048	9.12287
171	0.00179643	9.13381	171	0.000477	9.12968	171	0.000487	9.1295
172	0.00179126	9.14044	172	0.000456	9.13631	172	0.000498	9.13614
173	0.00174725	9.14708	173	0.000444	9.14295	173	0.000512	9.14278
174	0.0017095	9.15372	174	0.000449	9.14959	174	0.00052	9.14942
175	0.00163205	9.16036	175	0.000472	9.15622	175	0.000521	9.15605
176	0.00148615	9.167	176	0.000505	9.16286	176	0.000522	9.16269
177	0.00138138	9.17386	177	0.000532	9.16972	177	0.000504	9.16933
178	0.00134445	9.18049	178	0.000488	9.17636	178	0.000476	9.1762
179	0.00129606	9.18713	179	0.000429	9.18299	179	0.000426	9.18284
180	0.0011845	9.19377	180	0.000349	9.18964	180	0.000374	9.18948
181	0.00108819	9.20041	181	0.000272	9.19627	181	0.000329	9.19612
182	0.00105907	9.20705	182	0.000245	9.20291	182	0.000278	9.20275
183	0.00102358	9.21368	183	0.000229	9.20954	183	0.00025	9.20939
184	0.000879018	9.22031	184	0.000167	9.21618	184	0.00024	9.21602
185	0.000751125	9.22719	185	9.06e-05	9.22305	185	0.00022	9.22266
186	0.000770962	9.23383	186	4.05e-05	9.22969	186	0.000186	9.22953
187	0.000798672	9.24047	187	0	9.23633	187	0.000171	9.23616
188	0.000800959	9.2471	188	3.37e-05	9.24297	188	0.00017	9.2428
189	0.000814593	9.25373	189	8.68e-05	9.24961	189	0.000176	9.24944
190	0.00085226	9.26038	190	0.000148	9.25624	190	0.000191	9.25608
191	0.000871182	9.26702	191	0.000219	9.26288	191	0.000219	9.26271
192	0.000790874	9.27365	192	0.000256	9.26952	192	0.000277	9.26935
193	0.00066497	9.28052	193	0.000283	9.27638	193	0.000317	9.27599
194	0.000682904	9.28715	194	0.000347	9.28301	194	0.000357	9.28286
195	0.000758515	9.29379	195	0.00043	9.28965	195	0.000406	9.2895
196	0.0007498	9.30043	196	0.000502	9.29629	196	0.000437	9.29614
197	0.000733751	9.30706	197	0.000592	9.30293	197	0.000467	9.30278
198	0.000676822	9.3137	198	0.000669	9.30955	198	0.000489	9.30941
199	0.000569601	9.32034	199	0.000748	9.31619	199	0.00051	9.31605
200	0.000505621	9.32697	200	0.000817	9.32282	200	0.000542	9.32269
201	0.000479669	9.33385	201	0.000868	9.3297	201	0.000572	9.32932
202	0.000506835	9.34049	202	0.000917	9.33634	202	0.000598	9.33618
203	0.000577958	9.34712	203	0.000981	9.34297	203	0.000627	9.34282
204	0.000605741	9.35376	204	0.001043	9.34961	204	0.000628	9.34945
205	0.000618326	9.36041	205	0.001085	9.35625	205	0.000626	9.35609
206	0.000621267	9.36703	206	0.001119	9.36289	206	0.000642	9.36274
207	0.000540826	9.37367	207	0.001141	9.36952	207	0.000651	9.36937
208	0.000487478	9.38031	208	0.001163	9.37615	208	0.000651	9.376
209	0.000554211	9.38717	209	0.001142	9.38302	209	0.000638	9.38265
210	0.00061228	9.3938	210	0.001116	9.38965	210	0.000606	9.38951
211	0.00055677	9.40045	211	0.001057	9.39629	211	0.000569	9.39616
212	0.000499764	9.40708	212	0.000987	9.40293	212	0.000506	9.40279
213	0.00053411	9.41372	213	0.000896	9.40957	213	0.000426	9.40943
214	0.000569981	9.42036	214	0.000803	9.41623	214	0.000363	9.41607
215	0.000536422	9.42699	215	0.00076	9.42287	215	0.000337	9.4227
216	0.0005027	9.43363	216	0.000746	9.42951	216	0.00032	9.42934
217	0.000603848	9.4405	217	0.000721	9.43638	217	0.000286	9.43598
218	0.000724083	9.44714	218	0.000698	9.44303	218	0.000263	9.44284
219	0.00070209	9.45378	219	0.000693	9.44966	219	0.000233	9.44947
220	0.000648285	9.46042	220	0.000662	9.4563	220	0.000203	9.45611
221	0.000715067	9.46706	221	0.000677	9.46293	221	0.000187	9.46275
222	0.000799068	9.47369	222	0.00073	9.46957	222	0.00018	9.46941
223	0.000821658	9.48033	223	0.000787	9.47621	223	0.000208	9.47604
224	0.000858683	9.48696	224	0.000843	9.48284	224	0.000238	9.48268
225	0.00089113	9.49383	225	0.000865	9.4897	225	0.000248	9.48931
226	0.000886984	9.50046	226	0.000849	9.49634	226	0.000265	9.49619
227	0.000850632	9.5071	227	0.000829	9.50297	227	0.000302	9.50283
228	0.000845022	9.51374	228	0.000776	9.50962	228	0.000338	9.50946
229	0.000907035	9.52038	229	0.000733	9.51626	229	0.000379	9.5161
230	0.00100094	9.52701	230	0.000707	9.52288	230	0.000405	9.52274
231	0.00105986	9.53365	231	0.000673	9.52951	231	0.000426	9.52937
232	0.00106274	9.54029	232	0.000661	9.53615	232	0.000454	9.53601
233	0.0010449	9.54716	233	0.000673	9.54302	233	0.000451	9.54265
234	0.00107304	9.5538	234	0.000653	9.54966	234	0.000424	9.54951
235	0.00113821	9.56044	235	0.000614	9.5563	235	0.000392	9.55614
236	0.00126953	9.56708	236	0.000595	9.56294	236	0.000385	9.56278
237	0.00137439	9.57372	237	0.000584	9.56957	237	0.00038	9.56942
238	0.00145294	9.58034	238	0.000601	9.57621	238	0.000379	9.57605
239	0.00153307	9.58699	239	0.000621	9.58285	239	0.000392	9.58268
240	0.00158736	9.59362	240	0.000639	9.58948	240	0.000425	9.58932
241	0.0016459	9.60048	241	0.000627	9.59635	241	0.000451	9.59596
242	0.00175965	9.60712	242	0.000583	9.60298	242	0.000445	9.60283
243	0.0018709	9.61376	243	0.000564	9.60962	243	0.000444	9.60947
244	0.00192426	9.62039	244	0.000585	9.61626	244	0.000473	9.61611
245	0.00198186	9.62704	245	0.00065	9.62289	245	0.000496	9.62274
246	0.00201852	9.63367	246	0.000698	9.62954	246	0.000477	9.62938
247	0.00205823	9.64031	247	0.00068	9.63617	247	0.000453	9.63601
248	0.00207303	9.64694	248	0.000662	9.6428	248	0.000428	9.64266
249	0.0020864	9.65382	249	0.000701	9.64968	249	0.000402	9.64929
250	0.00213032	9.66045	250	0.000754	9.65632	250	0.000392	9.65615
251	0.00218559	9.66709	251	0.000852	9.66296	251	0.000397	9.66279
252	0.00223931	9.67373	252	0.000935	9.66959	252	0.000425	9.66943
253	0.00231809	9.68037	253	0.00102	9.67623	253	0.000458	9.67606
254	0.00236315	9.68701	254	0.001104	9.68287	254	0.000473	9.6827
255	0.00232832	9.69364	255	0.001134	9.6895	255	0.000475	9.68934
256	0.00229379	9.70028	256	0.001168	9.69614	256	0.000497	9.69597
257	0.00227394	9.70714	257	0.001256	9.703	257	0.000536	9.70262
258	0.00225355	9.71377	258	0.001341	9.70964	258	0.00057	9.70949
259	0.00223009	9.72041	259	0.001371	9.71628	259	0.000583	9.71612
260	0.00220183	9.72705	260	0.001401	9.72291	260	0.000581	9.72276
261	0.00213786	9.73369	261	0.001443	9.72955	261	0.000585	9.7294
262	0.00205982	9.74034	262	0.001508	9.73618	262	0.000586	9.73604
263	0.00193343	9.74698	263	0.001535	9.74282	263	0.00058	9.74267
264	0.00182696	9.75361	264	0.001568	9.74945	264	0.000579	9.74931
265	0.0018354	9.76049	265	0.001608	9.75632	265	0.000557	9.75594
266	0.00185429	9.76712	266	0.001614	9.76296	266	0.000526	9.76281
267	0.00183742	9.77376	267	0.001634	9.7696	267	0.000497	9.76944
268	0.00181245	9.7804	268	0.001683	9.77624	268	0.000475	9.77608
269	0.00178218	9.78704	269	0.001726	9.78288	269	0.000489	9.78272
270	0.00174642	9.79368	270	0.001738	9.78951	270	0.000504	9.78935
271	0.00174553	9.80031	271	0.001724	9.79615	271	0.000492	9.79598
272	0.00175279	9.80695	272	0.001689	9.80278	272	0.000478	9.80262
273	0.00178487	9.81381	273	0.001639	9.80965	273	0.000475	9.80926
274	0.00183034	9.82044	274	0.001542	9.81628	274	0.000476	9.81613
275	0.00184067	9.82708	275	0.001469	9.82292	275	0.000502	9.82277
276	0.00185286	9.83372	276	0.001444	9.82956	276	0.000526	9.82941
277	0.00186715	9.84036	277	0.001409	9.8362	277	0.000535	9.83605
278	0.00182613	9.84699	278	0.001369	9.84285	278	0.000541	9.84269
279	0.0017884	9.85362	279	0.00134	9.84948	279	0.000539	9.84932
280	0.00172001	9.86026	280	0.001338	9.85612	280	0.000542	9.85595
281	0.00164498	9.86713	281	0.001335	9.86299	281	0.000552	9.86259
282	0.00158073	9.87377	282	0.001355	9.86963	282	0.000567	9.86945
283	0.00150987	9.8804	283	0.001388	9.87627	283	0.000573	9.87609
284	0.00141973	9.88704	284	0.001463	9.88291	284	0.000568	9.88273
285	0.00132349	9.89368	285	0.001544	9.88954	285	0.000578	9.88936
286	0.00135018	9.90032	286	0.001594	9.89618	286	0.000629	9.89601
287	0.00140828	9.90696	287	0.001628	9.90281	287	0.000677	9.90265
288	0.00146432	9.91359	288	0.001669	9.90945	288	0.000687	9.90929
289	0.00150671	9.92046	289	0.001735	9.91632	289	0.000692	9.91593
290	0.00162535	9.92709	290	0.001783	9.92295	290	0.000703	9.9228
291	0.00176251	9.93372	291	0.001797	9.92959	291	0.000714	9.92943
292	0.00187331	9.94036	292	0.00179	9.93623	292	0.000751	9.93607
293	0.00197683	9.947	293	0.001779	9.94286	293	0.000789	9.94271
294	0.00211823	9.95364	294	0.001763	9.94951	294	0.000831	9.94934
295	0.0022994	9.96028	295	0.001756	9.95614	295	0.000866	9.95599
296	0.00233635	9.96692	296	0.00177	9.96278	296	0.000878	9.96262
297	0.00234796	9.97379	297	0.001797	9.96965	297	0.000896	9.96926
298	0.00242342	9.98042	298	0.001786	9.97629	298	0.00095	9.97612
299	0.00250937	9.98707	299	0.001674	9.98292	299	0.001003	9.98276
300	0.00255782	9.9937	300	0.001588	9.98957	300	0.001071	9.9894
301	0.00262816	10.0003	301	0.001652	9.9962	301	0.001149	9.99603
302	0.00270706	10.007	302	0.001714	10.0028	302	0.001183	10.0027
303	0.0027728	10.0136	303	0.00172	10.0095	303	0.001209	10.0093
304	0.00280916	10.0202	304	0.00172	10.0161	304	0.001259	10.016
305	0.00277425	10.0271	305	0.001763	10.023	305	0.001326	10.0226
306	0.00273924	10.0337	306	0.001816	10.0296	306	0.001382	10.0295
307	0.00264134	10.0404	307	0.001857	10.0362	307	0.00144	10.0361
308	0.00252726	10.047	308	0.001903	10.0429	308	0.0015	10.0427
309	0.00241359	10.0537	309	0.002047	10.0495	309	0.001563	10.0494
310	0.00229338	10.0603	310	0.002201	10.0562	310	0.001589	10.056
311	0.00213131	10.0669	311	0.002238	10.0628	311	0.001589	10.0626
312	0.00196858	10.0736	312	0.002275	10.0694	312	0.001603	10.0693
313	0.00185003	10.0804	313	0.002393	10.0763	313	0.001619	10.0759
314	0.00176017	10.0871	314	0.002546	10.0829	314	0.001613	10.0828
315	0.00170344	10.0937	315	0.002646	10.0896	315	0.001603	10.0894
316	0.00165393	10.1004	316	0.002739	10.0962	316	0.001591	10.096
317	0.0016872	10.107	317	0.00284	10.1028	317	0.001583	10.1027
318	0.00176437	10.1136	318	0.002929	10.1095	318	0.001574	10.1093
319	0.00183937	10.1203	319	0.002988	10.1161	319	0.001581	10.116
320	0.00188347	10.1269	320	0.003009	10.1228	320	0.001597	10.1226
321	0.00193246	10.1338	321	0.003029	10.1296	321	0.001617	10.1292
322	0.00200997	10.1404	322	0.003011	10.1363	322	0.001636	10.1361
323	0.00206454	10.147	323	0.00296	10.1429	323	0.001661	10.1427
324	0.00212932	10.1537	324	0.002884	10.1495	324	0.001684	10.1494
325	0.00219286	10.1603	325	0.002808	10.1562	325	0.001706	10.156
326	0.00214879	10.167	326	0.002709	10.1628	326	0.001733	10.1627
327	0.00208299	10.1736	327	0.002614	10.1695	327	0.001774	10.1693
328	0.00200151	10.1802	328	0.002588	10.1761	328	0.00183	10.1759
329	0.00193207	10.1871	329	0.002577	10.183	329	0.001871	10.1826
330	0.00189998	10.1937	330	0.002628	10.1896	330	0.001914	10.1894
331	0.00186506	10.2004	331	0.002695	10.1962	331	0.00198	10.1961
332	0.0018583	10.207	332	0.002795	10.2029	332	0.002066	10.2027
333	0.00187714	10.2137	333	0.002892	10.2095	333	0.002154	10.2094
334	0.00188368	10.2203	334	0.002943	10.2162	334	0.002242	10.216
335	0.00191217	10.2269	335	0.002964	10.2228	335	0.002332	10.2226
336	0.00205928	10.2336	336	0.003011	10.2294	336	0.002443	10.2293
337	0.00223938	10.2404	337	0.00307	10.2363	337	0.002531	10.2359
338	0.00239061	10.2471	338	0.003089	10.2429	338	0.002592	10.2428
339	0.00248608	10.2537	339	0.003119	10.2496	339	0.002655	10.2494
340	0.00258632	10.2603	340	0.003126	10.2562	340	0.002749	10.2561
341	0.00271871	10.267	341	0.003153	10.2629	341	0.002828	10.2627
342	0.00279832	10.2736	342	0.003183	10.2695	342	0.002864	10.2693
343	0.00288076	10.2803	343	0.003194	10.2761	343	0.0029	10.276
344	0.00293744	10.2869	344	0.003242	10.2827	344	0.00295	10.2826
345	0.00295232	10.2938	345	0.00333	10.2896	345	0.002988	10.2892
346	0.00295333	10.3004	346	0.003411	10.2963	346	0.003026	10.2961
347	0.00289281	10.307	347	0.003501	10.3029	347	0.003067	10.3027
348	0.00284344	10.3137	348	0.003579	10.3095	348	0.003137	10.3094
349	0.00284834	10.3203	349	0.003587	10.3162	349	0.003203	10.316
350	0.00284619	10.3269	350	0.003579	10.3228	350	0.003254	10.3226
351	0.00282082	10.3336	351	0.003638	10.3294	351	0.003312	10.3293
352	0.00279645	10.3402	352	0.003716	10.3361	352	0.003426	10.3359
353	0.00269138	10.3471	353	0.003779	10.3429	353	0.003554	10.3425
354	0.00255733	10.3537	354	0.003831	10.3496	354	0.003686	10.3494
355	0.00247902	10.3604	355	0.003872	10.3562	355	0.003832	10.3561
356	0.00242546	10.367	356	0.003912	10.3628	356	0.003942	10.3627
357	0.00238203	10.3736	357	0.003961	10.3695	357	0.004043	10.3693
358	0.00231612	10.3803	358	0.004031	10.3761	358	0.004124	10.376
359	0.00225578	10.3869	359	0.004146	10.3828	359	0.0042	10.3826
360	0.0022032	10.3935	360	0.00426	10.3894	360	0.004293	10.3893
361	0.00212063	10.4004	361	0.004285	10.3963	361	0.004427	10.3959
362	0.00200107	10.4071	362	0.004325	10.4029	362	0.004529	10.4027
363	0.00190853	10.4137	363	0.004414	10.4095	363	0.004611	10.4094
364	0.00179292	10.4203	364	0.004563	10.4162	364	0.004681	10.416
365	0.00167893	10.427	365	0.004712	10.4228	365	0.004761	10.4227
366	0.001674	10.4336	366	0.004832	10.4295	366	0.004856	10.4293
367	0.00170007	10.4402	367	0.004925	10.4361	367	0.004992	10.4359
368	0.0017607	10.4469	368	0.00495	10.4427	368	0.005132	10.4426
369	0.00181365	10.4537	369	0.004976	10.4496	369	0.0053	10.4492
370	0.00183633	10.4604	370	0.005034	10.4562	370	0.005432	10.4561
371	0.00187909	10.467	371	0.005083	10.4629	371	0.005555	10.4627
372	0.00202253	10.4736	372	0.005136	10.4695	372	0.005685	10.4694
373	0.00219186	10.4803	373	0.005186	10.4761	373	0.005836	10.476
374	0.00241848	10.4869	374	0.005223	10.4828	374	0.005981	10.4826
375	0.00260805	10.4936	375	0.005275	10.4894	375	0.00613	10.4893
376	0.00271225	10.5002	376	0.005353	10.4961	376	0.006278	10.4959
377	0.00282336	10.5071	377	0.005429	10.5029	377	0.006415	10.5025
378	0.00290335	10.5137	378	0.005557	10.5096	378	0.00656	10.5094
379	0.00297438	10.5204	379	0.005689	10.5162	379	0.006714	10.516
380	0.00304213	10.527	380	0.005804	10.5228	380	0.006883	10.5227
381	0.0030955	10.5336	381	0.005929	10.5295	381	0.007031	10.5293
382	0.003084	10.5403	382	0.00605	10.5361	382	0.007191	10.5359
383	0.00307395	10.5469	383	0.006201	10.5428	383	0.007347	10.5426
384	0.00304788	10.5535	384	0.00631	10.5494	384	0.007511	10.5492
385	0.00300646	10.5604	385	0.006393	10.5562	385	0.007666	10.5559
386	0.0029274	10.567	386	0.006482	10.5629	386	0.007847	10.5627
387	0.00285993	10.5737	387	0.006577	10.5695	387	0.008002	10.5694
388	0.00280117	10.5803	388	0.006658	10.5762	388	0.008136	10.576
389	0.00270654	10.587	389	0.006705	10.5828	389	0.008241	10.5827
390	0.00265186	10.5936	390	0.006745	10.5894	390	0.008345	10.5893
391	0.00265713	10.6002	391	0.006818	10.5961	391	0.008441	10.5959
392	0.00266626	10.6069	392	0.006859	10.6027	392	0.008581	10.6026
393	0.00270894	10.6137	393	0.006822	10.6096	393	0.008711	10.6092
394	0.00275537	10.6204	394	0.006791	10.6162	394	0.008823	10.6161
395	0.00270649	10.627	395	0.006815	10.6229	395	0.008919	10.6227
396	0.00264764	10.6336	396	0.006839	10.6295	396	0.009034	10.6293
397	0.00263906	10.6403	397	0.006916	10.6361	397	0.009156	10.636
398	0.00264846	10.6469	398	0.00701	10.6428	398	0.009317	10.6426
399	0.00272958	10.6535	399	0.00712	10.6494	399	0.009479	10.6493
400	0.00279915	10.6602	400	0.00722	10.6561	400	0.00965	10.6559
401	0.00274073	10.6671	401	0.00727	10.6629	401	0.009819	10.6625
402	0.00265214	10.6737	402	0.00732	10.6695	402	0.00997	10.6694
403	0.00255579	10.6803	403	0.007422	10.6762	403	0.010145	10.676
404	0.00248121	10.687	404	0.007531	10.6828	404	0.010341	10.6827
405	0.00252814	10.6936	405	0.007626	10.6895	405	0.010551	10.6893
406	0.00258326	10.7002	406	0.007743	10.6961	406	0.010747	10.6959
407	0.00257967	10.7069	407	0.007824	10.7027	407	0.010977	10.7026
408	0.00258699	10.7135	408	0.007923	10.7094	408	0.011179	10.7092
409	0.00256672	10.7204	409	0.008024	10.7162	409	0.011372	10.7159
410	0.00254092	10.727	410	0.008107	10.7229	410	0.011558	10.7227
411	0.00255744	10.7337	411	0.008212	10.7295	411	0.011779	10.7294
412	0.00251202	10.7403	412	0.008377	10.7362	412	0.011972	10.736
413	0.00245299	10.7469	413	0.008524	10.7428	413	0.012209	10.7426
414	0.00243923	10.7536	414	0.008645	10.7494	414	0.012429	10.7493
415	0.002419	10.7602	415	0.008738	10.7561	415	0.012696	10.7559
416	0.00243407	10.7668	416	0.008881	10.7627	416	0.012929	10.7625
417	0.00243824	10.7737	417	0.009003	10.7695	417	0.013196	10.7692
418	0.00243994	10.7803	418	0.009114	10.7762	418	0.01347	10.776
419	0.00244411	10.787	419	0.009236	10.7828	419	0.013792	10.7827
420	0.00244652	10.7936	420	0.009299	10.7895	420	0.014106	10.7893
421	0.00248842	10.8003	421	0.009333	10.7961	421	0.014457	10.796
422	0.00264973	10.8069	422	0.009372	10.8027	422	0.014826	10.8026
423	0.00280356	10.8135	423	0.009427	10.8094	423	0.015207	10.8092
424	0.00290877	10.8202	424	0.009519	10.816	424	0.015627	10.8159
425	0.00301316	10.827	425	0.009614	10.8229	425	0.016032	10.8225
426	0.00311063	10.8337	426	0.009638	10.8295	426	0.016478	10.8294
427	0.00322868	10.8403	427	0.009665	10.8362	427	0.016907	10.836
428	0.00326208	10.847	428	0.009737	10.8428	428	0.017403	10.8427
429	0.00323993	10.8536	429	0.009847	10.8494	429	0.017895	10.8493
430	0.00324559	10.8602	430	0.010057	10.8561	430	0.018465	10.8559
431	0.0032752	10.8669	431	0.010292	10.8627	431	0.018986	10.8626
432	0.00325002	10.8735	432	0.010463	10.8693	432	0.019618	10.8692
433	0.00319319	10.8804	433	0.010619	10.8762	433	0.020188	10.8758
434	0.00313992	10.887	434	0.010778	10.8828	434	0.020827	10.8827
435	0.00311445	10.8936	435	0.010967	10.8895	435	0.021426	10.8894
436	0.00306543	10.9003	436	0.011143	10.8961	436	0.022107	10.896
437	0.00303289	10.9069	437	0.011299	10.9028	437	0.022731	10.9026
438	0.00308002	10.9136	438	0.011396	10.9094	438	0.023438	10.9092
439	0.00320354	10.9202	439	0.011451	10.9161	439	0.024115	10.9159
440	0.00329085	10.9268	440	0.0115	10.9227	440	0.024822	10.9225
441	0.00320689	10.9337	441	0.011615	10.9295	441	0.025517	10.9292
442	0.0031435	10.9403	442	0.011733	10.9362	442	0.026151	10.936
443	0.00321849	10.947	443	0.01188	10.9428	443	0.026794	10.9427
444	0.00328328	10.9536	444	0.012008	10.9495	444	0.027433	10.9493
445	0.00327771	10.9602	445	0.012044	10.9561	445	0.028121	10.9559
446	0.00325385	10.9669	446	0.012085	10.9628	446	0.028772	10.9626
447	0.00317735	10.9735	447	0.012143	10.9694	447	0.029491	10.9692
448	0.00309444	10.9802	448	0.012201	10.976	448	0.030113	10.9759
449	0.00297785	10.987	449	0.012304	10.9828	449	0.030783	10.9825
450	0.00287017	10.9937	450	0.012407	10.9895	450	0.031399	10.9894
451	0.00296473	11.0003	451	0.012433	10.9962	451	0.032091	10.996
452	0.00308727	11.0069	452	0.012461	11.0028	452	0.032761	11.0027
453	0.00304183	11.0136	453	0.01251	11.0094	453	0.033532	11.0093
454	0.0029587	11.0202	454	0.012592	11.0161	454	0.034235	11.0159
455	0.00293692	11.0268	455	0.012718	11.0227	455	0.03502	11.0226
456	0.00293979	11.0335	456	0.012831	11.0293	456	0.035735	11.0292
457	0.0029706	11.0403	457	0.012953	11.0361	457	0.036488	11.0358
458	0.00302143	11.047	458	0.013091	11.0428	458	0.037197	11.0427
459	0.00306505	11.0536	459	0.013185	11.0495	459	0.038017	11.0493
460	0.00307076	11.0603	460	0.013267	11.0561	460	0.038773	11.056
461	0.00305145	11.0669	461	0.013355	11.0628	461	0.039571	11.0626
462	0.00310804	11.0735	462	0.01349	11.0694	462	0.040327	11.0693
463	0.00321918	11.0802	463	0.01358	11.076	463	0.041091	11.0759
464	0.00336767	11.0868	464	0.013658	11.0827	464	0.041854	11.0825
465	0.00348965	11.0937	465	0.013748	11.0895	465	0.04258	11.0892
466	0.00353384	11.1003	466	0.013814	11.0962	466	0.043327	11.096
467	0.00356568	11.107	467	0.013873	11.1028	467	0.044061	11.1027
468	0.00363423	11.1136	468	0.013967	11.1095	468	0.044831	11.1093
469	0.00372715	11.1202	469	0.014065	11.1161	469	0.045486	11.1159
470	0.0039143	11.1269	470	0.014181	11.1227	470	0.046189	11.1226
471	0.00408213	11.1335	471	0.01429	11.1294	471	0.046806	11.1292
472	0.00407924	11.1401	472	0.014359	11.136	472	0.047509	11.1358
473	0.00404952	11.147	473	0.014429	11.1428	473	0.048116	11.1425
474	0.00401616	11.1536	474	0.014508	11.1495	474	0.048793	11.1494
475	0.00398701	11.1603	475	0.014601	11.1561	475	0.049397	11.156
476	0.004016	11.1669	476	0.014744	11.1628	476	0.050096	11.1626
477	0.00404483	11.1736	477	0.014894	11.1694	477	0.050714	11.1693
478	0.00401414	11.1802	478	0.015019	11.1761	478	0.051416	11.1759
479	0.00397345	11.1868	479	0.015162	11.1827	479	0.052068	11.1825
480	0.00386788	11.1935	480	0.01526	11.1893	480	0.052756	11.1892
481	0.00373505	11.2003	481	0.015324	11.1961	481	0.053392	11.1958
482	0.00367567	11.207	482	0.015408	11.2028	482	0.053998	11.2027
483	0.00365772	11.2136	483	0.015539	11.2095	483	0.054572	11.2093
484	0.00364111	11.2202	484	0.015617	11.2161	484	0.055147	11.2159
485	0.0036337	11.2269	485	0.015628	11.2227	485	0.055714	11.2226
486	0.00363101	11.2335	486	0.015639	11.2294	486	0.056201	11.2292
487	0.00365619	11.2402	487	0.01568	11.236	487	0.056686	11.2359
488	0.00368545	11.2468	488	0.015693	11.2426	488	0.057119	11.2425
489	0.00367998	11.2537	489	0.015671	11.2494	489	0.057574	11.2491
490	0.00368704	11.2603	490	0.015687	11.2561	490	0.057979	11.256
491	0.00369969	11.267	491	0.015826	11.2628	491	0.058401	11.2626
492	0.00370497	11.2736	492	0.015934	11.2694	492	0.058789	11.2693
493	0.00366238	11.2802	493	0.015982	11.2761	493	0.059201	11.2759
494	0.00361406	11.2869	494	0.016053	11.2827	494	0.059542	11.2826
495	0.00360042	11.2935	495	0.01623	11.2893	495	0.059901	11.2892
496	0.00359201	11.3001	496	0.0164	11.296	496	0.060219	11.2958
497	0.00361141	11.307	497	0.016492	11.3027	497	0.060541	11.3025
498	0.00365859	11.3136	498	0.016582	11.3095	498	0.060806	11.3093
499	0.00372137	11.3203	499	0.016709	11.3161	499	0.061095	11.316
500	0.00376644	11.3269	500	0.016832	11.3227	500	0.06135	11.3226
501	0.00383384	11.3336	501	0.016844	11.3294	501	0.06159	11.3292
502	0.0039135	11.3402	502	0.016849	11.336	502	0.061803	11.3359
503	0.00403908	11.3468	503	0.016916	11.3427	503	0.062034	11.3425
504	0.00418689	11.3534	504	0.017011	11.3493	504	0.062229	11.3491
505	0.00427477	11.3603	505	0.017061	11.356	505	0.062405	11.3558
506	0.00431985	11.367	506	0.017114	11.3628	506	0.062572	11.3627
507	0.00432092	11.3736	507	0.017219	11.3695	507	0.06274	11.3693
508	0.00433663	11.3802	508	0.017346	11.3761	508	0.062884	11.3759
509	0.0043843	11.3869	509	0.017439	11.3827	509	0.063001	11.3826
510	0.00451738	11.3935	510	0.017507	11.3894	510	0.063119	11.3892
511	0.00464197	11.4001	511	0.017612	11.396	511	0.063224	11.3958
512	0.0047887	11.4068	512	0.017771	11.4026	512	0.063318	11.4025
513	0.00492196	11.4136	513	0.017878	11.4094	513	0.063346	11.4091
514	0.00497386	11.4203	514	0.017953	11.4161	514	0.06337	11.416
515	0.00504133	11.4269	515	0.018022	11.4228	515	0.063394	11.4226
516	0.00519661	11.4336	516	0.018132	11.4294	516	0.063423	11.4293
517	0.00534931	11.4402	517	0.01823	11.4361	517	0.063431	11.4359
518	0.00537515	11.4468	518	0.018316	11.4427	518	0.063435	11.4425
519	0.00536626	11.4535	519	0.018411	11.4493	519	0.063426	11.4492
520	0.00532675	11.4601	520	0.018543	11.456	520	0.063421	11.4558
521	0.005301	11.4669	521	0.018661	11.4627	521	0.063436	11.4625
522	0.00523378	11.4736	522	0.018777	11.4695	522	0.063461	11.4693
523	0.00516216	11.4803	523	0.018905	11.4761	523	0.063507	11.4759
524	0.00515065	11.4869	524	0.018998	11.4827	524	0.06356	11.4826
525	0.00513651	11.4935	525	0.019076	11.4894	525	0.063594	11.4892
526	0.00508195	11.5002	526	0.019159	11.496	526	0.063619	11.4959
527	0.00503829	11.5068	527	0.019266	11.5027	527	0.063641	11.5025
528	0.00507491	11.5134	528	0.0194	11.5093	528	0.063647	11.5091
529	0.00512369	11.5203	529	0.019558	11.516	529	0.063648	11.5158
530	0.00513527	11.5269	530	0.019688	11.5228	530	0.06365	11.5227
531	0.00513054	11.5336	531	0.019804	11.5294	531	0.063638	11.5293
532	0.00512956	11.5402	532	0.019873	11.5361	532	0.063579	11.5359
533	0.0051081	11.5469	533	0.019931	11.5427	533	0.063517	11.5426
534	0.00509239	11.5535	534	0.02005	11.5494	534	0.063434	11.5492
535	0.00512825	11.5601	535	0.020236	11.556	535	0.063354	11.5558
536	0.00514976	11.5668	536	0.020357	11.5626	536	0.06326	11.5625
537	0.00512707	11.5736	537	0.020412	11.5693	537	0.063174	11.5691
538	0.00510921	11.5803	538	0.020447	11.5761	538	0.063075	11.576
539	0.00509852	11.5869	539	0.020506	11.5828	539	0.06297	11.5826
540	0.00508688	11.5936	540	0.020571	11.5894	540	0.062846	11.5892
541	0.00510671	11.6002	541	0.020619	11.596	541	0.062724	11.5959
542	0.00513935	11.6068	542	0.020666	11.6027	542	0.062613	11.6025
543	0.00515523	11.6135	543	0.02073	11.6093	543	0.062495	11.6092
544	0.0051484	11.6201	544	0.02077	11.616	544	0.062368	11.6158
545	0.00514448	11.6269	545	0.020764	11.6227	545	0.062233	11.6224
546	0.00517511	11.6336	546	0.020771	11.6295	546	0.062108	11.6293
547	0.0052609	11.6402	547	0.020754	11.6361	547	0.06198	11.6359
548	0.00537847	11.6469	548	0.020706	11.6427	548	0.061887	11.6426
549	0.00550264	11.6535	549	0.020683	11.6494	549	0.061798	11.6492
550	0.005626	11.6601	550	0.020701	11.656	550	0.061706	11.6559
551	0.00571298	11.6668	551	0.020757	11.6627	551	0.061601	11.6625
552	0.00577986	11.6734	552	0.02082	11.6693	552	0.061497	11.6691
553	0.00589862	11.6802	553	0.02082	11.676	553	0.061366	11.6758
554	0.0060633	11.6869	554	0.020771	11.6828	554	0.061241	11.6826
555	0.00615972	11.6936	555	0.020764	11.6894	555	0.06109	11.6893
556	0.00614675	11.7002	556	0.020819	11.6961	556	0.060947	11.6959
557	0.00610951	11.7068	557	0.020949	11.7027	557	0.06081	11.7025
558	0.00609995	11.7135	558	0.021119	11.7094	558	0.06066	11.7092
559	0.00608948	11.7201	559	0.021201	11.716	559	0.060476	11.7158
560	0.00602924	11.7268	560	0.021195	11.7226	560	0.060302	11.7225
561	0.00597433	11.7335	561	0.021191	11.7293	561	0.060095	11.7291
562	0.00601998	11.7403	562	0.021224	11.7361	562	0.059915	11.736
563	0.0060591	11.7469	563	0.021309	11.7428	563	0.059732	11.7426
564	0.00607704	11.7535	564	0.021474	11.7494	564	0.059567	11.7492
565	0.00611225	11.7602	565	0.021589	11.756	565	0.059431	11.7559
566	0.00627695	11.7668	566	0.021598	11.7627	566	0.059294	11.7625
567	0.00645241	11.7734	567	0.021596	11.7693	567	0.059166	11.7692
568	0.00656384	11.7801	568	0.02157	11.7759	568	0.059053	11.7758
569	0.00667453	11.7869	569	0.021558	11.7826	569	0.058922	11.7824
570	0.00679888	11.7936	570	0.0216	11.7894	570	0.058779	11.7893
571	0.00689791	11.8002	571	0.021634	11.7961	571	0.058669	11.7959
572	0.0069289	11.8069	572	0.021688	11.8027	572	0.058549	11.8026
573	0.00697573	11.8135	573	0.021775	11.8094	573	0.058451	11.8092
574	0.0070196	11.8201	574	0.021795	11.816	574	0.058336	11.8158
575	0.00706521	11.8268	575	0.021788	11.8226	575	0.05822	11.8225
576	0.00706766	11.8334	576	0.021819	11.8293	576	0.058092	11.8291
577	0.00707327	11.8402	577	0.021843	11.8359	577	0.057954	11.8357
578	0.00706981	11.8469	578	0.021861	11.8428	578	0.057832	11.8426
579	0.00703805	11.8535	579	0.021859	11.8494	579	0.057758	11.8492
580	0.00703882	11.8602	580	0.021855	11.856	580	0.0577	11.8559
581	0.00705087	11.8668	581	0.02185	11.8627	581	0.057656	11.8625
582	0.00705803	11.8735	582	0.021781	11.8693	582	0.057576	11.8692
583	0.00711081	11.8801	583	0.021681	11.8759	583	0.05751	11.8758
584	0.00715994	11.8867	584	0.021625	11.8826	584	0.057463	11.8824
585	0.0071934	11.8935	585	0.021632	11.8893	585	0.057423	11.8891
586	0.00721538	11.9002	586	0.021643	11.8961	586	0.057393	11.8959
587	0.00733943	11.9069	587	0.021603	11.9027	587	0.057359	11.9026
588	0.00747816	11.9135	588	0.021576	11.9094	588	0.057308	11.9092
589	0.00764749	11.9202	589	0.021619	11.916	589	0.057258	11.9159
590	0.00782223	11.9268	590	0.021663	11.9227	590	0.05721	11.9225
591	0.00797957	11.9334	591	0.021734	11.9293	591	0.05716	11.9291
592	0.0081107	11.9401	592	0.021804	11.9359	592	0.057148	11.9358
593	0.00818666	11.9468	593	0.021832	11.9426	593	0.057127	11.9424
594	0.00826924	11.9536	594	0.021848	11.9494	594	0.057092	11.9493
595	0.00838963	11.9602	595	0.021818	11.9561	595	0.057039	11.9559
596	0.0085311	11.9668	596	0.021791	11.9627	596	0.056983	11.9626
597	0.00855138	11.9735	597	0.021772	11.9693	597	0.056915	11.9692
598	0.00857318	11.9801	598	0.021731	11.976	598	0.056848	11.9758
599	0.00859989	11.9868	599	0.021683	11.9826	599	0.056796	11.9825
600	0.00863375	11.9934	600	0.021661	11.9892	600	0.056748	11.9891
601	0.00874315	12.0002	601	0.021619	11.9959	601	0.056737	11.9957
602	0.00895623	12.0069	602	0.021583	12.0028	602	0.056737	12.0026
603	0.00915452	12.0136	603	0.021603	12.0094	603	0.056758	12.0092
604	0.00933252	12.0202	604	0.02166	12.016	604	0.056791	12.0159
605	0.0094852	12.0268	605	0.021702	12.0227	605	0.056849	12.0225
606	0.00961413	12.0335	606	0.021699	12.0293	606	0.056912	12.0291
607	0.0097371	12.0401	607	0.021739	12.0359	607	0.057026	12.0358
608	0.00982437	12.0467	608	0.021782	12.0426	608	0.05715	12.0424
609	0.00990908	12.0535	609	0.021779	12.0492	609	0.057337	12.0491
610	0.0100296	12.0602	610	0.021749	12.0561	610	0.057568	12.0559
611	0.0101059	12.0669	611	0.021712	12.0627	611	0.057793	12.0626
612	0.0100549	12.0735	612	0.021644	12.0693	612	0.058042	12.0692
613	0.0100072	12.0802	613	0.021556	12.076	613	0.058347	12.0758
614	0.0100142	12.0868	614	0.021447	12.0826	614	0.058717	12.0825
615	0.0100273	12.0934	615	0.021363	12.0893	615	0.059113	12.0891
616	0.010066	12.1	616	0.021332	12.0959	616	0.059548	12.0958
617	0.0101166	12.1068	617	0.021309	12.1026	617	0.059988	12.1024
618	0.0102306	12.1136	618	0.021228	12.1094	618	0.060558	12.1092
619	0.0103552	12.1202	619	0.021124	12.116	619	0.061083	12.1159
620	0.0104761	12.1268	620	0.021076	12.1227	620	0.061714	12.1225
621	0.0106191	12.1335	621	0.021054	12.1293	621	0.062327	12.1292
622	0.0108115	12.1401	622	0.021031	12.136	622	0.063132	12.1358
623	0.01102	12.1467	623	0.020987	12.1426	623	0.063869	12.1424
624	0.0112084	12.1534	624	0.020944	12.1492	624	0.064805	12.1491
625	0.0114163	12.1601	625	0.020912	12.1559	625	0.06571	12.1557
626	0.0115791	12.1669	626	0.020863	12.1627	626	0.066828	12.1626
627	0.0116874	12.1735	627	0.020798	12.1694	627	0.067922	12.1692
628	0.0117855	12.1802	628	0.02079	12.176	628	0.069175	12.1759
629	0.0119201	12.1868	629	0.020763	12.1827	629	0.070444	12.1825
630	0.0120393	12.1934	630	0.020682	12.1893	630	0.071933	12.1891
631	0.0122311	12.2001	631	0.020582	12.1959	631	0.073501	12.1958
632	0.0124222	12.2067	632	0.020509	12.2026	632	0.075227	12.2024
633	0.0126908	12.2134	633	0.020462	12.2092	633	0.077131	12.209
634	0.0129337	12.2202	634	0.020404	12.2161	634	0.079125	12.2159
635	0.0130823	12.2269	635	0.020316	12.2227	635	0.081356	12.2226
636	0.0132557	12.2335	636	0.020238	12.2294	636	0.083695	12.2292
637	0.0136018	12.2401	637	0.020238	12.236	637	0.08635	12.2358
638	0.0139289	12.2468	638	0.020257	12.2426	638	0.089028	12.2425
639	0.014226	12.2534	639	0.020278	12.2493	639	0.092104	12.2491
640	0.0145015	12.26	640	0.020293	12.2559	640	0.095135	12.2557
641	0.0148222	12.2667	641	0.020266	12.2625	641	0.098707	12.2624
642	0.0151586	12.2735	642	0.020233	12.2694	642	0.102176	12.2692
643	0.0154344	12.2802	643	0.020236	12.276	643	0.106168	12.2759
644	0.0157286	12.2868	644	0.020249	12.2827	644	0.110018	12.2825
645	0.0161485	12.2935	645	0.020261	12.2893	645	0.114606	12.2892
646	0.0166034	12.3001	646	0.020267	12.2959	646	0.118931	12.2958
647	0.0169937	12.3067	647	0.020258	12.3026	647	0.124072	12.3024
648	0.0174452	12.3133	648	0.02027	12.3092	648	0.128887	12.3091
649	0.0179649	12.32	649	0.020344	12.3158	649	0.134654	12.3157
650	0.0186032	12.3269	650	0.020432	12.3227	650	0.140095	12.3226
651	0.0191375	12.3335	651	0.020568	12.3293	651	0.146345	12.3292
652	0.0197108	12.3401	652	0.02072	12.336	652	0.152484	12.3358
653	0.0203032	12.3468	653	0.02081	12.3426	653	0.159323	12.3425
654	0.0210138	12.3534	654	0.020861	12.3493	654	0.166255	12.3491
655	0.0216848	12.36	655	0.020936	12.3559	655	0.173561	12.3558
656	0.0223942	12.3667	656	0.021024	12.3625	656	0.181292	12.3624
657	0.0230698	12.3734	657	0.021055	12.3692	657	0.189048	12.369
658	0.0238843	12.3802	658	0.021042	12.376	658	0.197525	12.3759
659	0.0246121	12.3868	659	0.021016	12.3827	659	0.205613	12.3825
660	0.0252547	12.3935	660	0.021004	12.3893	660	0.214712	12.3892
661	0.0258613	12.4001	661	0.020978	12.3959	661	0.22338	12.3958
662	0.0265295	12.4067	662	0.020918	12.4026	662	0.233176	12.4024
663	0.0271583	12.4134	663	0.020877	12.4093	663	0.242459	12.4091
664	0.0277863	12.42	664	0.020904	12.4159	664	0.253011	12.4157
665	0.0284222	12.4267	665	0.02093	12.4225	665	0.262879	12.4224
666	0.0291023	12.4335	666	0.020965	12.4294	666	0.273929	12.4292
667	0.0297972	12.4402	667	0.02101	12.436	667	0.284297	12.4359
668	0.0304218	12.4468	668	0.021064	12.4427	668	0.295912	12.4425
669	0.0311011	12.4534	669	0.021109	12.4493	669	0.306886	12.4491
670	0.0318766	12.4601	670	0.021142	12.4559	670	0.319129	12.4558
671	0.032726	12.4667	671	0.021182	12.4626	671	0.330419	12.4624
672	0.0335467	12.4734	672	0.02124	12.4692	672	0.343316	12.4691
673	0.0344503	12.48	673	0.021295	12.4759	673	0.355327	12.4757
674	0.0352987	12.4869	674	0.021321	12.4827	674	0.368272	12.4826
675	0.0362098	12.4935	675	0.021351	12.4894	675	0.380712	12.4892
676	0.0371042	12.5001	676	0.021364	12.496	676	0.393899	12.4959
677	0.0381571	12.5068	677	0.021373	12.5026	677	0.406868	12.5025
678	0.0391384	12.5134	678	0.021422	12.5093	678	0.420194	12.5091
679	0.040247	12.52	679	0.021525	12.5159	679	0.433659	12.5158
680	0.0412581	12.5267	680	0.021617	12.5225	680	0.447014	12.5224
681	0.042331	12.5333	681	0.021714	12.5292	681	0.461071	12.529
682	0.0433243	12.5402	682	0.021805	12.536	682	0.47415	12.5359
683	0.0444269	12.5468	683	0.021857	12.5427	683	0.488131	12.5425
684	0.0454613	12.5535	684	0.021914	12.5493	684	0.501228	12.5492
685	0.0467067	12.5601	685	0.022049	12.5559	685	0.515341	12.5558
686	0.0478488	12.5667	686	0.022188	12.5626	686	0.528284	12.5624
687	0.0489605	12.5734	687	0.022385	12.5692	687	0.542461	12.5691
688	0.0500292	12.58	688	0.022555	12.5759	688	0.555464	12.5757
689	0.051198	12.5867	689	0.022701	12.5825	689	0.569681	12.5823
690	0.052395	12.5935	690	0.022844	12.5894	690	0.582554	12.5892
691	0.0535071	12.6001	691	0.022963	12.596	691	0.596587	12.5959
692	0.0546145	12.6068	692	0.023089	12.6026	692	0.609172	12.6025
693	0.0557552	12.6134	693	0.023359	12.6093	693	0.622991	12.6091
694	0.057012	12.6201	694	0.023639	12.6159	694	0.635537	12.6158
695	0.0580973	12.6267	695	0.023823	12.6226	695	0.649482	12.6224
696	0.0592604	12.6333	696	0.023999	12.6292	696	0.662293	12.629
697	0.0604227	12.64	697	0.024192	12.6358	697	0.675936	12.6357
698	0.0617537	12.6468	698	0.024429	12.6427	698	0.688429	12.6425
699	0.0628264	12.6535	699	0.024656	12.6493	699	0.701394	12.6492
700	0.0638893	12.6601	700	0.024895	12.656	700	0.713675	12.6558
701	0.0649638	12.6668	701	0.025226	12.6626	701	0.726108	12.6624
702	0.0662182	12.6734	702	0.025676	12.6692	702	0.738408	12.6691
703	0.0672651	12.68	703	0.026027	12.6759	703	0.75038	12.6757
704	0.0683459	12.6867	704	0.026352	12.6825	704	0.762396	12.6824
705	0.0693152	12.6933	705	0.026706	12.6891	705	0.773527	12.689
706	0.0705783	12.7002	706	0.027122	12.696	706	0.785041	12.6959
707	0.071672	12.7068	707	0.027502	12.7027	707	0.795626	12.7025
708	0.0727786	12.7134	708	0.027985	12.7093	708	0.806814	12.7091
709	0.0738646	12.7201	709	0.028457	12.7159	709	0.816981	12.7158
710	0.0751158	12.7267	710	0.028957	12.7226	710	0.827727	12.7224
711	0.0763288	12.7334	711	0.02939	12.7292	711	0.837379	12.7291
712	0.077526	12.74	712	0.029871	12.7358	712	0.847462	12.7357
713	0.078745	12.7467	713	0.030352	12.7425	713	0.856511	12.7423
714	0.0800008	12.7535	714	0.030964	12.7493	714	0.866001	12.7492
715	0.0813162	12.7602	715	0.031558	12.756	715	0.87445	12.7558
716	0.0824832	12.7668	716	0.032251	12.7626	716	0.88319	12.7625
717	0.083799	12.7734	717	0.032917	12.7692	717	0.890983	12.7691
718	0.0849817	12.7801	718	0.033582	12.7759	718	0.899068	12.7757
719	0.0862101	12.7867	719	0.034266	12.7825	719	0.906283	12.7824
720	0.0872942	12.7933	720	0.035058	12.7892	720	0.913562	12.789
721	0.0884274	12.8	721	0.03588	12.7958	721	0.920115	12.7957
722	0.0894409	12.8068	722	0.036695	12.8027	722	0.926705	12.8025
723	0.0904826	12.8135	723	0.037566	12.8093	723	0.932752	12.8092
724	0.0913704	12.8201	724	0.038408	12.8159	724	0.938882	12.8158
725	0.0922658	12.8267	725	0.039299	12.8226	725	0.944482	12.8224
726	0.0929878	12.8334	726	0.040169	12.8292	726	0.949979	12.8291
727	0.0937373	12.84	727	0.041112	12.8359	727	0.955048	12.8357
728	0.0944494	12.8466	728	0.042012	12.8425	728	0.960048	12.8423
729	0.0952718	12.8533	729	0.043009	12.8491	729	0.964743	12.849
730	0.0960315	12.8602	730	0.043919	12.856	730	0.969205	12.8558
731	0.096882	12.8668	731	0.044895	12.8627	731	0.973424	12.8625
732	0.0976699	12.8734	732	0.0458	12.8693	732	0.977451	12.8691
733	0.0985815	12.8801	733	0.046836	12.8759	733	0.981301	12.8758
734	0.0994671	12.8867	734	0.04781	12.8826	734	0.984409	12.8824
735	0.100445	12.8933	735	0.048886	12.8892	735	0.987427	12.889
736	0.101397	12.9	736	0.049857	12.8958	736	0.989982	12.8957
737	0.102215	12.9066	737	0.050909	12.9025	737	0.992592	12.9023
738	0.103019	12.9135	738	0.051873	12.9093	738	0.994399	12.9092
739	0.103791	12.9201	739	0.052932	12.916	739	0.996217	12.9158
740	0.104618	12.9268	740	0.053931	12.9226	740	0.997424	12.9225
741	0.105338	12.9334	741	0.055065	12.9292	741	0.998578	12.9291
742	0.106103	12.94	742	0.056128	12.9359	742	0.999145	12.9357
743	0.106749	12.9467	743	0.057208	12.9425	743	0.99968	12.9424
744	0.107474	12.9533	744	0.058274	12.9492	744	0.999922	12.949
745	0.108065	12.9599	745	0.059391	12.9558	745	1	12.9556
746	0.108706	12.9668	746	0.060514	12.9627	746	0.999774	12.9625
747	0.109315	12.9735	747	0.061653	12.9693	747	0.999377	12.9691
748	0.109941	12.9801	748	0.062834	12.9759	748	0.998839	12.9758
749	0.110478	12.9867	749	0.063966	12.9826	749	0.997951	12.9824
750	0.111104	12.9934	750	0.065191	12.9892	750	0.997045	12.9891
751	0.11168	13	751	0.066312	12.9959	751	0.995698	12.9957
752	0.112307	13.0066	752	0.067556	13.0025	752	0.994281	13.0023
753	0.112851	13.0133	753	0.068739	13.0091	753	0.992324	13.009
754	0.113346	13.0201	754	0.070061	13.016	754	0.990483	13.0158
755	0.113801	13.0268	755	0.071264	13.0226	755	0.988227	13.0225
756	0.114265	13.0334	756	0.07256	13.0293	756	0.986015	13.0291
757	0.114724	13.04	757	0.073715	13.0359	757	0.983108	13.0358
758	0.115163	13.0467	758	0.074915	13.0425	758	0.980233	13.0424
759	0.115565	13.0533	759	0.075993	13.0492	759	0.976836	13.049
760	0.11593	13.06	760	0.07721	13.0558	760	0.97333	13.0557
761	0.116334	13.0666	761	0.078313	13.0625	761	0.969734	13.0623
762	0.116721	13.0735	762	0.079462	13.0693	762	0.965983	13.0691
763	0.117145	13.0801	763	0.080482	13.076	763	0.962135	13.0758
764	0.117517	13.0867	764	0.08153	13.0826	764	0.958024	13.0824
765	0.117884	13.0934	765	0.082499	13.0892	765	0.953742	13.0891
766	0.118177	13.1	766	0.083551	13.0959	766	0.949056	13.0957
767	0.118469	13.1067	767	0.084573	13.1025	767	0.944498	13.1023
768	0.118765	13.1133	768	0.085647	13.1091	768	0.939519	13.109
769	0.119073	13.1199	769	0.08671	13.1158	769	0.934833	13.1156
770	0.11926	13.1268	770	0.087669	13.1227	770	0.929616	13.1225
771	0.119396	13.1334	771	0.088653	13.1293	771	0.924603	13.1291
772	0.119447	13.1401	772	0.089563	13.1359	772	0.919008	13.1358
773	0.119444	13.1467	773	0.090527	13.1426	773	0.913763	13.1424
774	0.119445	13.1533	774	0.091371	13.1492	774	0.907839	13.1491
775	0.119429	13.16	775	0.092295	13.1558	775	0.902486	13.1557
776	0.119404	13.1666	776	0.093066	13.1625	776	0.896186	13.1623
777	0.119369	13.1733	777	0.093938	13.1691	777	0.890533	13.169
778	0.119323	13.1801	778	0.094671	13.176	778	0.884054	13.1758
779	0.119233	13.1868	779	0.095406	13.1826	779	0.878114	13.1824
780	0.119145	13.1934	780	0.096025	13.1893	780	0.871633	13.1891
781	0.119117	13.2	781	0.096639	13.1959	781	0.86538	13.1957
782	0.119103	13.2067	782	0.097161	13.2025	782	0.858879	13.2024
783	0.119102	13.2133	783	0.09777	13.2092	783	0.852386	13.209
784	0.119104	13.2199	784	0.098304	13.2158	784	0.845694	13.2157
785	0.119132	13.2266	785	0.098853	13.2225	785	0.838792	13.2223
786	0.119161	13.2334	786	0.099345	13.2293	786	0.832335	13.2291
787	0.119155	13.2401	787	0.099804	13.236	787	0.825369	13.2358
788	0.119115	13.2467	788	0.100258	13.2426	788	0.818834	13.2424
789	0.119096	13.2534	789	0.100776	13.2492	789	0.811616	13.2491
790	0.119067	13.26	790	0.1013	13.2559	790	0.804965	13.2557
791	0.119043	13.2666	791	0.101805	13.2625	791	0.797701	13.2623
792	0.119102	13.2733	792	0.102301	13.2691	792	0.790823	13.269
793	0.119156	13.2799	793	0.102702	13.2758	793	0.783236	13.2756
794	0.119192	13.2868	794	0.103131	13.2826	794	0.776277	13.2824
795	0.119231	13.2934	795	0.103486	13.2893	795	0.768679	13.2891
796	0.119286	13.3001	796	0.103854	13.2959	796	0.761646	13.2958
797	0.119369	13.3067	797	0.104158	13.3025	797	0.753911	13.3024
798	0.119439	13.3133	798	0.104468	13.3092	798	0.746949	13.309
799	0.119526	13.32	799	0.104732	13.3158	799	0.739208	13.3157
800	0.119681	13.3266	800	0.105057	13.3225	800	0.732162	13.3223
801	0.119774	13.3332	801	0.105339	13.3291	801	0.724215	13.3289
802	0.119746	13.3401	802	0.105572	13.336	802	0.716911	13.3358
803	0.119726	13.3467	803	0.105729	13.3426	803	0.70921	13.3424
804	0.119709	13.3534	804	0.105762	13.3492	804	0.701838	13.3491
805	0.119685	13.36	805	0.10578	13.3559	805	0.694136	13.3557
806	0.119643	13.3667	806	0.105852	13.3625	806	0.686485	13.3624
807	0.119612	13.3733	807	0.105909	13.3691	807	0.679018	13.369
808	0.11973	13.3799	808	0.105943	13.3758	808	0.671102	13.3756
809	0.119858	13.3866	809	0.105924	13.3824	809	0.663825	13.3823
810	0.120013	13.3934	810	0.105763	13.3893	810	0.655881	13.3891
811	0.120201	13.4001	811	0.105612	13.3959	811	0.648888	13.3958
812	0.12055	13.4067	812	0.105534	13.4026	812	0.641133	13.4024
813	0.12096	13.4133	813	0.10548	13.4092	813	0.634118	13.409
814	0.121492	13.42	814	0.105442	13.4158	814	0.626359	13.4157
815	0.122101	13.4266	815	0.10536	13.4225	815	0.619518	13.4223
816	0.122825	13.4333	816	0.105218	13.4291	816	0.611805	13.429
817	0.123683	13.4399	817	0.105086	13.4358	817	0.604775	13.4356
818	0.124555	13.4468	818	0.104942	13.4426	818	0.597103	13.4424
819	0.125569	13.4534	819	0.104767	13.4492	819	0.590145	13.4491
820	0.126556	13.46	820	0.104655	13.4559	820	0.582635	13.4557
821	0.127611	13.4667	821	0.104555	13.4625	821	0.575797	13.4624
822	0.128661	13.4733	822	0.104378	13.4692	822	0.568257	13.469
823	0.129944	13.48	823	0.104056	13.4758	823	0.561338	13.4756
824	0.131222	13.4866	824	0.103811	13.4824	824	0.553872	13.4823
825	0.132826	13.4932	825	0.103555	13.4891	825	0.546721	13.4889
826	0.134374	13.5001	826	0.103289	13.4959	826	0.539622	13.4957
827	0.136224	13.5067	827	0.102933	13.5026	827	0.532656	13.5024
828	0.13797	13.5134	828	0.102598	13.5092	828	0.526008	13.5091
829	0.140151	13.52	829	0.102265	13.5159	829	0.519031	13.5157
830	0.142276	13.5267	830	0.101925	13.5225	830	0.512523	13.5223
831	0.145039	13.5333	831	0.101404	13.5291	831	0.505404	13.529
832	0.147741	13.5399	832	0.100882	13.5358	832	0.499108	13.5356
833	0.150825	13.5466	833	0.10044	13.5424	833	0.492061	13.5422
834	0.154023	13.5534	834	0.099976	13.5493	834	0.486024	13.549
835	0.157627	13.5601	835	0.099576	13.5559	835	0.479316	13.5558
836	0.161519	13.5667	836	0.099192	13.5625	836	0.473338	13.5624
837	0.165647	13.5733	837	0.098868	13.5692	837	0.466761	13.569
838	0.170249	13.58	838	0.098527	13.5758	838	0.460737	13.5757
839	0.174791	13.5866	839	0.098108	13.5825	839	0.454188	13.5823
840	0.179915	13.5932	840	0.097568	13.5891	840	0.448219	13.5889
841	0.184884	13.5999	841	0.097204	13.5957	841	0.44183	13.5956
842	0.190741	13.6068	842	0.096884	13.6026	842	0.436059	13.6023
843	0.196391	13.6134	843	0.096594	13.6092	843	0.429889	13.6091
844	0.202826	13.62	844	0.096227	13.6159	844	0.424188	13.6157
845	0.208839	13.6267	845	0.095822	13.6225	845	0.418093	13.6224
846	0.21588	13.6333	846	0.09529	13.6292	846	0.412307	13.629
847	0.222431	13.6399	847	0.094776	13.6358	847	0.406314	13.6356
848	0.230134	13.6466	848	0.094194	13.6424	848	0.400502	13.6423
849	0.237299	13.6532	849	0.09372	13.6491	849	0.394818	13.6489
850	0.245821	13.6601	850	0.093303	13.6559	850	0.389004	13.6557
851	0.25376	13.6667	851	0.092878	13.6626	851	0.383528	13.6624
852	0.262595	13.6733	852	0.092339	13.6692	852	0.377735	13.6691
853	0.27112	13.68	853	0.091807	13.6758	853	0.372455	13.6757
854	0.280449	13.6866	854	0.091321	13.6825	854	0.366715	13.6823
855	0.289684	13.6933	855	0.09084	13.6891	855	0.361588	13.689
856	0.299357	13.6999	856	0.090379	13.6958	856	0.355944	13.6956
857	0.309485	13.7065	857	0.089882	13.7024	857	0.350977	13.7022
858	0.319649	13.7134	858	0.089385	13.7093	858	0.345513	13.709
859	0.3306	13.72	859	0.088841	13.7159	859	0.34068	13.7157
860	0.341079	13.7267	860	0.088301	13.7225	860	0.335421	13.7224
861	0.352536	13.7333	861	0.087719	13.7292	861	0.330749	13.729
862	0.363695	13.74	862	0.087193	13.7358	862	0.325572	13.7356
863	0.376012	13.7466	863	0.086616	13.7424	863	0.320939	13.7423
864	0.387835	13.7532	864	0.086058	13.7491	864	0.315937	13.7489
865	0.400673	13.7599	865	0.085457	13.7557	865	0.311481	13.7556
866	0.412691	13.7667	866	0.084886	13.7626	866	0.306728	13.7623
867	0.425837	13.7734	867	0.084236	13.7692	867	0.302318	13.7691
868	0.438175	13.78	868	0.083654	13.7759	868	0.297766	13.7757
869	0.451746	13.7866	869	0.083077	13.7825	869	0.293392	13.7823
870	0.464492	13.7933	870	0.082546	13.7891	870	0.289001	13.789
871	0.478534	13.7999	871	0.081994	13.7958	871	0.284607	13.7956
872	0.491427	13.8066	872	0.081493	13.8024	872	0.280446	13.8023
873	0.505462	13.8132	873	0.080988	13.809	873	0.276163	13.8089
874	0.518411	13.8201	874	0.080523	13.8159	874	0.272203	13.8156
875	0.5326	13.8267	875	0.079944	13.8226	875	0.267983	13.8224
876	0.545797	13.8333	876	0.079423	13.8292	876	0.264256	13.829
877	0.559843	13.84	877	0.078942	13.8358	877	0.26022	13.8357
878	0.573023	13.8466	878	0.07847	13.8425	878	0.256603	13.8423
879	0.586882	13.8533	879	0.077925	13.8491	879	0.25265	13.849
880	0.600271	13.8599	880	0.077375	13.8557	880	0.249118	13.8556
881	0.613616	13.8665	881	0.076856	13.8624	881	0.245349	13.8622
882	0.627116	13.8734	882	0.076332	13.8692	882	0.241898	13.8689
883	0.640073	13.88	883	0.075812	13.8759	883	0.238257	13.8757
884	0.653553	13.8867	884	0.07526	13.8825	884	0.234901	13.8824
885	0.666127	13.8933	885	0.074806	13.8892	885	0.231376	13.889
886	0.679708	13.8999	886	0.074316	13.8958	886	0.228056	13.8956
887	0.691767	13.9066	887	0.073851	13.9024	887	0.224509	13.9023
888	0.704833	13.9132	888	0.073349	13.9091	888	0.22124	13.9089
889	0.716421	13.9199	889	0.072931	13.9157	889	0.217863	13.9155
890	0.72939	13.9267	890	0.072499	13.9226	890	0.214798	13.9223
891	0.741013	13.9334	891	0.072092	13.9292	891	0.211548	13.9291
892	0.7534	13.94	892	0.071672	13.9359	892	0.208591	13.9357
893	0.764644	13.9466	893	0.071281	13.9425	893	0.20545	13.9423
894	0.776642	13.9533	894	0.070844	13.9491	894	0.202478	13.949
895	0.787461	13.9599	895	0.070484	13.9558	895	0.199459	13.9556
896	0.798917	13.9665	896	0.070182	13.9624	896	0.196508	13.9622
897	0.809593	13.9732	897	0.069905	13.969	897	0.193735	13.9689
898	0.82116	13.98	898	0.06955	13.9759	898	0.190933	13.9756
899	0.83157	13.9867	899	0.069221	13.9825	899	0.188299	13.9824
900	0.84196	13.9933	900	0.06888	13.9892	900	0.185476	13.989
901	0.851468	14	901	0.068555	13.9958	901	0.182947	13.9957
902	0.861205	14.0066	902	0.068232	14.0024	902	0.180208	14.0023
903	0.870304	14.0132	903	0.067951	14.0091	903	0.177821	14.009
904	0.879015	14.0199	904	0.067753	14.0157	904	0.17521	14.0156
905	0.887506	14.0265	905	0.06755	14.0224	905	0.172888	14.0222
906	0.895432	14.0334	906	0.06733	14.0292	906	0.170403	14.0289
907	0.903469	14.04	907	0.067136	14.0359	907	0.168156	14.0357
908	0.91038	14.0467	908	0.067001	14.0425	908	0.165796	14.0424
909	0.91759	14.0533	909	0.06685	14.0491	909	0.163648	14.049
910	0.923867	14.0599	910	0.066708	14.0558	910	0.161336	14.0556
911	0.930542	14.0666	911	0.066549	14.0624	911	0.159216	14.0623
912	0.936191	14.0732	912	0.066355	14.0691	912	0.157006	14.0689
913	0.942152	14.0798	913	0.066114	14.0757	913	0.154964	14.0755
914	0.9474	14.0867	914	0.065875	14.0825	914	0.152847	14.0822
915	0.952835	14.0933	915	0.065644	14.0892	915	0.150886	14.089
916	0.95751	14.1	916	0.065413	14.0958	916	0.148839	14.0957
917	0.962209	14.1066	917	0.065181	14.1025	917	0.146911	14.1023
918	0.966276	14.1132	918	0.064993	14.1091	918	0.144831	14.109
919	0.97023	14.1199	919	0.064787	14.1157	919	0.142858	14.1156
920	0.973871	14.1265	920	0.064601	14.1224	920	0.140974	14.1222
921	0.977718	14.1332	921	0.06437	14.129	921	0.139134	14.1289
922	0.981043	14.14	922	0.064197	14.1359	922	0.137359	14.1355
923	0.98393	14.1467	923	0.064059	14.1425	923	0.135591	14.1424
924	0.98649	14.1533	924	0.063913	14.1492	924	0.13393	14.149
925	0.988989	14.1599	925	0.063732	14.1558	925	0.132217	14.1556
926	0.991175	14.1666	926	0.063552	14.1624	926	0.130671	14.1623
927	0.993108	14.1732	927	0.063343	14.1691	927	0.129014	14.1689
928	0.994901	14.1798	928	0.063151	14.1757	928	0.127559	14.1755
929	0.996599	14.1865	929	0.06306	14.1823	929	0.125925	14.1822
930	0.998016	14.1933	930	0.063002	14.1892	930	0.124451	14.1889
931	0.99873	14.2	931	0.062972	14.1958	931	0.122846	14.1957
932	0.999431	14.2066	932	0.062932	14.2025	932	0.121394	14.2023
933	0.999792	14.2133	933	0.062902	14.2091	933	0.119837	14.209
934	1	14.2199	934	0.062874	14.2158	934	0.118456	14.2156
935	0.999626	14.2266	935	0.062914	14.2224	935	0.116946	14.2223
936	0.999134	14.2332	936	0.062988	14.229	936	0.115588	14.2289
937	0.998272	14.2398	937	0.063092	14.2356	937	0.114092	14.2355
938	0.997215	14.2467	938	0.063199	14.2425	938	0.112777	14.2422
939	0.995771	14.2533	939	0.063262	14.2492	939	0.111406	14.249
940	0.994034	14.26	940	0.063336	14.2558	940	0.110151	14.2556
941	0.992112	14.2666	941	0.06345	14.2624	941	0.108878	14.2623
942	0.989658	14.2733	942	0.063591	14.2691	942	0.10769	14.2689
943	0.987317	14.2799	943	0.063752	14.2757	943	0.106439	14.2756
944	0.984439	14.2865	944	0.063959	14.2823	944	0.105223	14.2822
945	0.981592	14.2932	945	0.064136	14.289	945	0.104067	14.2888
946	0.978128	14.3	946	0.064332	14.2958	946	0.10291	14.2955
947	0.974788	14.3067	947	0.064538	14.3025	947	0.101817	14.3024
948	0.970749	14.3133	948	0.064853	14.3091	948	0.100657	14.309
949	0.96694	14.3199	949	0.065153	14.3158	949	0.099655	14.3156
950	0.962406	14.3266	950	0.06551	14.3224	950	0.098601	14.3223
951	0.958153	14.3332	951	0.065861	14.3291	951	0.097605	14.3289
952	0.953372	14.3398	952	0.066222	14.3357	952	0.096516	14.3355
953	0.948689	14.3465	953	0.066565	14.3423	953	0.095537	14.3422
954	0.943649	14.3533	954	0.066995	14.3492	954	0.094451	14.3488
955	0.938631	14.36	955	0.067432	14.3558	955	0.093458	14.3557
956	0.93352	14.3666	956	0.067911	14.3625	956	0.092419	14.3623
957	0.928206	14.3733	957	0.068405	14.3691	957	0.091508	14.3689
958	0.922866	14.3799	958	0.06891	14.3758	958	0.090572	14.3756
959	0.917091	14.3865	959	0.069469	14.3824	959	0.089669	14.3822
960	0.911566	14.3932	960	0.070094	14.389	960	0.088696	14.3889
961	0.905332	14.3998	961	0.070837	14.3957	961	0.087817	14.3955
962	0.89968	14.4067	962	0.071654	14.4025	962	0.0869	14.4022
963	0.893413	14.4133	963	0.072562	14.4092	963	0.086085	14.409
964	0.887706	14.4199	964	0.073434	14.4158	964	0.085266	14.4156
965	0.881082	14.4266	965	0.074404	14.4224	965	0.084509	14.4223
966	0.874981	14.4332	966	0.075385	14.4291	966	0.083666	14.4289
967	0.868083	14.4399	967	0.076513	14.4357	967	0.08287	14.4356
968	0.861918	14.4465	968	0.077656	14.4423	968	0.082016	14.4422
969	0.854801	14.4531	969	0.079033	14.449	969	0.081192	14.4488
970	0.848422	14.46	970	0.080341	14.4558	970	0.080373	14.4555
971	0.841314	14.4666	971	0.081813	14.4625	971	0.079548	14.4623
972	0.834696	14.4733	972	0.083245	14.4691	972	0.078768	14.469
973	0.827515	14.4799	973	0.084952	14.4758	973	0.07797	14.4756
974	0.820669	14.4866	974	0.086586	14.4824	974	0.077237	14.4822
975	0.813481	14.4932	975	0.088498	14.4891	975	0.076463	14.4889
976	0.806398	14.4998	976	0.090305	14.4957	976	0.075777	14.4955
977	0.799008	14.5065	977	0.092452	14.5023	977	0.075022	14.5022
978	0.791423	14.5133	978	0.094463	14.5092	978	0.074374	14.5088
979	0.784168	14.52	979	0.096799	14.5158	979	0.073651	14.5157
980	0.776531	14.5266	980	0.099094	14.5224	980	0.07301	14.5223
981	0.769431	14.5332	981	0.101688	14.5291	981	0.072313	14.5289
982	0.76178	14.5399	982	0.104318	14.5357	982	0.071697	14.5356
983	0.75459	14.5465	983	0.107186	14.5424	983	0.071066	14.5422
984	0.74671	14.5531	984	0.11022	14.549	984	0.070513	14.5488
985	0.739493	14.5598	985	0.113389	14.5556	985	0.069816	14.5555
986	0.731427	14.5666	986	0.116807	14.5625	986	0.069213	14.5621
987	0.724193	14.5733	987	0.120267	14.5691	987	0.068593	14.569
988	0.716106	14.5799	988	0.124164	14.5758	988	0.068032	14.5756
989	0.708681	14.5866	989	0.12798	14.5824	989	0.06751	14.5823
990	0.700425	14.5932	990	0.132248	14.5891	990	0.067017	14.5889
991	0.692793	14.5998	991	0.136402	14.5957	991	0.066522	14.5955
992	0.684262	14.6065	992	0.141163	14.6023	992	0.066012	14.6022
993	0.676426	14.6131	993	0.145765	14.609	993	0.065451	14.6088
994	0.66809	14.62	994	0.150971	14.6158	994	0.064847	14.6155
995	0.660445	14.6266	995	0.155974	14.6225	995	0.064405	14.6223
996	0.652333	14.6332	996	0.161661	14.6291	996	0.063948	14.629
997	0.64475	14.6399	997	0.166989	14.6357	997	0.063524	14.6356
998	0.636737	14.6465	998	0.173088	14.6424	998	0.063025	14.6422
999	0.629083	14.6532	999	0.178803	14.649	999	0.062556	14.6489
1000	0.621339	14.6598	1000	0.185369	14.6557	1000	0.06205	14.6555
1001	0.613787	14.6664	1001	0.191504	14.6623	1001	0.061602	14.6622
1002	0.606286	14.6733	1002	0.198681	14.6692	1002	0.061102	14.6688
1003	0.598734	14.68	1003	0.205411	14.6758	1003	0.060692	14.6756
1004	0.591397	14.6866	1004	0.212953	14.6825	1004	0.060293	14.6823
1005	0.58392	14.6932	1005	0.220235	14.6891	1005	0.059894	14.6889
1006	0.576556	14.6999	1006	0.228345	14.6957	1006	0.059392	14.6956
1007	0.568798	14.7065	1007	0.236412	14.7024	1007	0.05895	14.7022
1008	0.561588	14.7131	1008	0.244764	14.709	1008	0.058553	14.7088
1009	0.553933	14.7198	1009	0.25349	14.7156	1009	0.058179	14.7155
1010	0.54666	14.7266	1010	0.262293	14.7225	1010	0.057784	14.7221
1011	0.538983	14.7333	1011	0.27173	14.7291	1011	0.05742	14.729
1012	0.531915	14.7399	1012	0.280728	14.7358	1012	0.057072	14.7356
1013	0.524466	14.7466	1013	0.290673	14.7424	1013	0.056732	14.7423
1014	0.517374	14.7532	1014	0.300192	14.7491	1014	0.056331	14.7489
1015	0.509836	14.7598	1015	0.310736	14.7557	1015	0.055944	14.7555
1016	0.50312	14.7665	1016	0.320485	14.7623	1016	0.055617	14.7622
1017	0.495936	14.7731	1017	0.331417	14.769	1017	0.055282	14.7688
1018	0.489449	14.78	1018	0.341659	14.7758	1018	0.054935	14.7755
1019	0.482691	14.7866	1019	0.352935	14.7825	1019	0.054574	14.7823
1020	0.476537	14.7933	1020	0.363362	14.7891	1020	0.054255	14.7889
1021	0.469775	14.7999	1021	0.375147	14.7957	1021	0.053922	14.7956
1022	0.463682	14.8065	1022	0.38595	14.8024	1022	0.053621	14.8022
1023	0.457066	14.8132	1023	0.398187	14.809	1023	0.053298	14.8088
1024	0.451123	14.8198	1024	0.409291	14.8156	1024	0.053056	14.8155
1025	0.444432	14.8264	1025	0.421742	14.8223	1025	0.052806	14.8221
1026	0.438317	14.8333	1026	0.433226	14.8292	1026	0.0526	14.8288
1027	0.432078	14.8399	1027	0.445729	14.8358	1027	0.052377	14.8356
1028	0.426199	14.8466	1028	0.457751	14.8424	1028	0.052182	14.8423
1029	0.419873	14.8532	1029	0.470143	14.8491	1029	0.051953	14.8489
1030	0.413698	14.8598	1030	0.482446	14.8557	1030	0.051749	14.8555
1031	0.407842	14.8665	1031	0.494695	14.8623	1031	0.051554	14.8622
1032	0.401806	14.8731	1032	0.507464	14.869	1032	0.051385	14.8688
1033	0.396124	14.8798	1033	0.519386	14.8756	1033	0.051209	14.8755
1034	0.389977	14.8866	1034	0.532279	14.8825	1034	0.051046	14.8821
1035	0.384702	14.8933	1035	0.544123	14.8891	1035	0.05087	14.889
1036	0.378812	14.8999	1036	0.557149	14.8958	1036	0.050708	14.8956
1037	0.373498	14.9065	1037	0.569047	14.9024	1037	0.050527	14.9022
1038	0.367633	14.9132	1038	0.581953	14.909	1038	0.050364	14.9089
1039	0.362573	14.9198	1039	0.593837	14.9157	1039	0.050276	14.9155
1040	0.356946	14.9265	1040	0.606997	14.9223	1040	0.050193	14.9222
1041	0.35186	14.9331	1041	0.618775	14.9289	1041	0.050097	14.9288
1042	0.346406	14.94	1042	0.631574	14.9358	1042	0.049996	14.9354
1043	0.341623	14.9466	1043	0.643223	14.9424	1043	0.049962	14.9423
1044	0.336232	14.9532	1044	0.655854	14.9491	1044	0.049947	14.9489
1045	0.331349	14.9599	1045	0.667274	14.9557	1045	0.049935	14.9556
1046	0.326344	14.9665	1046	0.679535	14.9624	1046	0.049907	14.9622
1047	0.321748	14.9732	1047	0.69057	14.969	1047	0.049921	14.9688
1048	0.316957	14.9798	1048	0.702521	14.9756	1048	0.049935	14.9755
1049	0.312426	14.9864	1049	0.713613	14.9823	1049	0.049936	14.9821
1050	0.307896	14.9933	1050	0.724815	14.9891	1050	0.049944	14.9887
1051	0.30341	14.9999	1051	0.735591	14.9958	1051	0.049953	14.9956
1052	0.299068	15.0066	1052	0.746319	15.0024	1052	0.049943	15.0023
1053	0.294572	15.0132	1053	0.757012	15.0091	1053	0.049885	15.0089
1054	0.290675	15.0199	1054	0.767246	15.0157	1054	0.04979	15.0155
1055	0.286533	15.0265	1055	0.777791	15.0223	1055	0.049715	15.0222
1056	0.282623	15.0331	1056	0.787444	15.029	1056	0.049643	15.0288
1057	0.278376	15.0398	1057	0.797631	15.0356	1057	0.049574	15.0354
1058	0.274631	15.0466	1058	0.80672	15.0425	1058	0.049498	15.0421
1059	0.270658	15.0533	1059	0.816596	15.0491	1059	0.049412	15.0489
1060	0.267188	15.0599	1060	0.825431	15.0557	1060	0.049341	15.0556
1061	0.263521	15.0665	1061	0.835076	15.0624	1061	0.049286	15.0622
1062	0.260153	15.0732	1062	0.843558	15.069	1062	0.049286	15.0689
1063	0.25643	15.0798	1063	0.852763	15.0756	1063	0.049294	15.0755
1064	0.253097	15.0864	1064	0.860864	15.0823	1064	0.049322	15.0821
1065	0.249512	15.0931	1065	0.869607	15.0889	1065	0.049354	15.0888
1066	0.246404	15.0999	1066	0.877411	15.0958	1066	0.049393	15.0954
1067	0.242949	15.1066	1067	0.885869	15.1024	1067	0.049433	15.1023
1068	0.2398	15.1132	1068	0.893293	15.1091	1068	0.049497	15.1089
1069	0.236324	15.1199	1069	0.900925	15.1157	1069	0.049561	15.1156
1070	0.233107	15.1265	1070	0.907805	15.1223	1070	0.049627	15.1222
1071	0.229886	15.1331	1071	0.914925	15.129	1071	0.0497	15.1288
1072	0.226857	15.1398	1072	0.921389	15.1356	1072	0.049729	15.1355
1073	0.223872	15.1464	1073	0.927726	15.1423	1073	0.049753	15.1421
1074	0.220881	15.1533	1074	0.933643	15.1491	1074	0.049787	15.1487
1075	0.218032	15.1599	1075	0.939594	15.1558	1075	0.049829	15.1556
1076	0.215095	15.1665	1076	0.945427	15.1624	1076	0.049877	15.1623
1077	0.212504	15.1732	1077	0.950817	15.169	1077	0.049927	15.1689
1078	0.209739	15.1798	1078	0.956212	15.1757	1078	0.049981	15.1755
1079	0.207293	15.1865	1079	0.960925	15.1823	1079	0.050051	15.1822
1080	0.204581	15.1931	1080	0.965685	15.1889	1080	0.050092	15.1888
1081	0.202126	15.1997	1081	0.969727	15.1956	1081	0.050127	15.1954
1082	0.19956	15.2066	1082	0.974023	15.2025	1082	0.050175	15.2021
1083	0.197378	15.2132	1083	0.977694	15.2091	1083	0.050226	15.2089
1084	0.195083	15.2199	1084	0.981617	15.2157	1084	0.050267	15.2156
1085	0.193026	15.2265	1085	0.9845	15.2224	1085	0.050315	15.2222
1086	0.190745	15.2332	1086	0.987445	15.229	1086	0.050363	15.2288
1087	0.188741	15.2398	1087	0.989751	15.2356	1087	0.050425	15.2355
1088	0.186636	15.2464	1088	0.992111	15.2423	1088	0.050471	15.2421
1089	0.184855	15.2531	1089	0.99407	15.2489	1089	0.050499	15.2488
1090	0.182939	15.2599	1090	0.995821	15.2558	1090	0.050526	15.2554
1091	0.181145	15.2666	1091	0.997087	15.2624	1091	0.050587	15.2623
1092	0.179223	15.2732	1092	0.998133	15.269	1092	0.050651	15.2689
1093	0.177455	15.2798	1093	0.998866	15.2757	1093	0.050705	15.2755
1094	0.175544	15.2865	1094	0.999382	15.2823	1094	0.050755	15.2822
1095	0.173751	15.2931	1095	0.999771	15.289	1095	0.050837	15.2888
1096	0.172068	15.2997	1096	0.999939	15.2956	1096	0.050932	15.2955
1097	0.170401	15.3064	1097	1	15.3022	1097	0.050993	15.3021
1098	0.16885	15.3133	1098	0.999662	15.3091	1098	0.051046	15.3087
1099	0.167293	15.3199	1099	0.999347	15.3157	1099	0.051116	15.3156
1100	0.165955	15.3265	1100	0.998745	15.3224	1100	0.051202	15.3222
1101	0.164544	15.3332	1101	0.998074	15.329	1101	0.051267	15.3289
1102	0.163208	15.3398	1102	0.996706	15.3357	1102	0.051345	15.3355
1103	0.161729	15.3464	1103	0.995187	15.3423	1103	0.051428	15.3421
1104	0.160566	15.3531	1104	0.993368	15.3489	1104	0.051496	15.3488
1105	0.159364	15.3597	1105	0.991472	15.3556	1105	0.051533	15.3554
1106	0.158334	15.3666	1106	0.989288	15.3624	1106	0.05159	15.362
1107	0.157279	15.3732	1107	0.986928	15.3691	1107	0.051664	15.3689
1108	0.156359	15.3799	1108	0.984358	15.3757	1108	0.051743	15.3756
1109	0.155447	15.3865	1109	0.981539	15.3823	1109	0.051805	15.3822
1110	0.15468	15.3931	1110	0.97863	15.389	1110	0.051852	15.3888
1111	0.153883	15.3998	1111	0.975356	15.3956	1111	0.051891	15.3955
1112	0.153258	15.4064	1112	0.972324	15.4023	1112	0.051951	15.4021
1113	0.15261	15.413	1113	0.9689	15.4089	1113	0.05202	15.4087
1114	0.152013	15.4199	1114	0.96542	15.4158	1114	0.052093	15.4154
1115	0.151412	15.4265	1115	0.961374	15.4224	1115	0.052152	15.4222
1116	0.150869	15.4332	1116	0.957485	15.4291	1116	0.052176	15.4289
1117	0.150294	15.4398	1117	0.953005	15.4357	1117	0.052201	15.4355
1118	0.149741	15.4465	1118	0.948755	15.4423	1118	0.052214	15.4422
1119	0.149149	15.4531	1119	0.943681	15.449	1119	0.052223	15.4488
1120	0.148583	15.4597	1120	0.938973	15.4556	1120	0.052254	15.4554
1121	0.148072	15.4664	1121	0.933611	15.4622	1121	0.052294	15.4621
1122	0.147572	15.4732	1122	0.928671	15.4691	1122	0.052325	15.4687
1123	0.147277	15.4799	1123	0.923059	15.4757	1123	0.052371	15.4756
1124	0.147008	15.4865	1124	0.917701	15.4824	1124	0.052408	15.4822
1125	0.146765	15.4932	1125	0.911943	15.489	1125	0.052429	15.4889
1126	0.146489	15.4998	1126	0.90623	15.4956	1126	0.052459	15.4955
1127	0.146326	15.5064	1127	0.900226	15.5023	1127	0.052501	15.5021
1128	0.146187	15.5131	1128	0.894131	15.5089	1128	0.052561	15.5088
1129	0.146136	15.5197	1129	0.888124	15.5155	1129	0.052633	15.5154
1130	0.146113	15.5266	1130	0.881781	15.5224	1130	0.052682	15.5221
1131	0.146162	15.5332	1131	0.875701	15.5291	1131	0.052725	15.5289
1132	0.146269	15.5398	1132	0.869076	15.5357	1132	0.052735	15.5356
1133	0.14634	15.5465	1133	0.862874	15.5423	1133	0.052713	15.5422
1134	0.146411	15.5531	1134	0.855936	15.549	1134	0.052719	15.5488
1135	0.146519	15.5598	1135	0.849333	15.5556	1135	0.052792	15.5555
1136	0.146745	15.5664	1136	0.841997	15.5622	1136	0.052856	15.5621
1137	0.146957	15.573	1137	0.83519	15.5689	1137	0.052883	15.5687
1138	0.147333	15.5799	1138	0.827743	15.5757	1138	0.052907	15.5754
1139	0.147711	15.5865	1139	0.820909	15.5824	1139	0.052916	15.5822
1140	0.148154	15.5932	1140	0.813394	15.589	1140	0.052922	15.5889
1141	0.148599	15.5998	1141	0.806534	15.5956	1141	0.052906	15.5955
1142	0.149023	15.6064	1142	0.798761	15.6023	1142	0.052892	15.6021
1143	0.14945	15.6131	1143	0.791773	15.6089	1143	0.052892	15.6088
1144	0.149967	15.6197	1144	0.78401	15.6156	1144	0.052884	15.6154
1145	0.150559	15.6263	1145	0.776891	15.6222	1145	0.052842	15.622
1146	0.151079	15.6332	1146	0.769296	15.6291	1146	0.05281	15.6287
1147	0.151609	15.6398	1147	0.762109	15.6357	1147	0.052836	15.6356
1148	0.152046	15.6465	1148	0.754319	15.6424	1148	0.052885	15.6422
1149	0.152583	15.6531	1149	0.746669	15.649	1149	0.052944	15.6488
1150	0.153092	15.6598	1150	0.738797	15.6556	1150	0.053005	15.6555
1151	0.153679	15.6664	1151	0.730794	15.6623	1151	0.05307	15.6621
1152	0.154311	15.673	1152	0.723035	15.6689	1152	0.05312	15.6687
1153	0.155147	15.6797	1153	0.714934	15.6755	1153	0.053173	15.6754
1154	0.155892	15.6865	1154	0.707213	15.6824	1154	0.053226	15.682
1155	0.156681	15.6932	1155	0.699098	15.689	1155	0.05328	15.6889
1156	0.157472	15.6998	1156	0.691527	15.6957	1156	0.053361	15.6955
1157	0.158459	15.7064	1157	0.68352	15.7023	1157	0.053407	15.7022
1158	0.159353	15.7131	1158	0.676194	15.7089	1158	0.053423	15.7088
1159	0.160361	15.7197	1159	0.668187	15.7156	1159	0.053435	15.7154
1160	0.161329	15.7264	1160	0.660876	15.7222	1160	0.053424	15.7221
1161	0.162297	15.733	1161	0.653049	15.7289	1161	0.053427	15.7287
1162	0.163216	15.7399	1162	0.645779	15.7357	1162	0.053448	15.7353
1163	0.16403	15.7465	1163	0.637781	15.7424	1163	0.053468	15.7422
1164	0.164857	15.7532	1164	0.630663	15.749	1164	0.053507	15.7488
1165	0.165671	15.7598	1165	0.622797	15.7556	1165	0.053529	15.7555
1166	0.166514	15.7664	1166	0.615567	15.7623	1166	0.053513	15.7621
1167	0.16723	15.7731	1167	0.607669	15.7689	1167	0.053498	15.7688
1168	0.167986	15.7797	1168	0.600458	15.7756	1168	0.053509	15.7754
1169	0.168611	15.7864	1169	0.592617	15.7822	1169	0.053526	15.782
1170	0.169288	15.7932	1170	0.58535	15.789	1170	0.053578	15.7887
1171	0.16994	15.7999	1171	0.577403	15.7957	1171	0.053634	15.7956
1172	0.170633	15.8065	1172	0.570113	15.8023	1172	0.053662	15.8022
1173	0.171301	15.8131	1173	0.562512	15.809	1173	0.053678	15.8088
1174	0.172025	15.8198	1174	0.555156	15.8156	1174	0.053704	15.8155
1175	0.172699	15.8264	1175	0.547733	15.8222	1175	0.053746	15.8221
1176	0.173463	15.833	1176	0.540335	15.8289	1176	0.053766	15.8287
1177	0.174181	15.8397	1177	0.533232	15.8355	1177	0.053763	15.8354
1178	0.17498	15.8465	1178	0.52607	15.8424	1178	0.05375	15.842
1179	0.175704	15.8532	1179	0.519242	15.849	1179	0.053747	15.8489
1180	0.17652	15.8598	1180	0.512045	15.8557	1180	0.053715	15.8555
1181	0.17727	15.8665	1181	0.505507	15.8623	1181	0.05365	15.8621
1182	0.178021	15.8731	1182	0.498541	15.8689	1182	0.053623	15.8688
1183	0.17869	15.8797	1183	0.492146	15.8756	1183	0.053632	15.8754
1184	0.17946	15.8864	1184	0.485174	15.8822	1184	0.053622	15.8821
1185	0.180181	15.893	1185	0.478841	15.8888	1185	0.05362	15.8887
1186	0.180887	15.8999	1186	0.471937	15.8957	1186	0.053633	15.8953
1187	0.181572	15.9065	1187	0.465458	15.9024	1187	0.053629	15.9022
1188	0.182189	15.9131	1188	0.458317	15.909	1188	0.053617	15.9088
1189	0.182801	15.9198	1189	0.452079	15.9156	1189	0.053607	15.9155
1190	0.183337	15.9264	1190	0.445514	15.9223	1190	0.053613	15.9221
1191	0.183906	15.9331	1191	0.43946	15.9289	1191	0.053644	15.9288
1192	0.184476	15.9397	1192	0.432698	15.9355	1192	0.053664	15.9354
1193	0.185079	15.9463	1193	0.426597	15.9422	1193	0.053654	15.942
1194	0.185491	15.9532	1194	0.420222	15.949	1194	0.053637	15.9487
1195	0.185888	15.9598	1195	0.414429	15.9557	1195	0.053527	15.9555
1196	0.18622	15.9665	1196	0.408142	15.9623	1196	0.053417	15.9622
1197	0.186605	15.9731	1197	0.402358	15.969	1197	0.053388	15.9688
1198	0.186995	15.9797	1198	0.396534	15.9756	1198	0.053366	15.9754
1199	0.187477	15.9864	1199	0.390953	15.9822	1199	0.053292	15.9821
1200	0.187871	15.993	1200	0.385124	15.9889	1200	0.0532	15.9887
1201	0.188216	15.9997	1201	0.379423	15.9955	1201	0.053104	15.9954
1202	0.188512	16.0065	1202	0.373998	16.0024	1202	0.053005	16.002
1203	0.188813	16.0132	1203	0.368478	16.009	1203	0.052875	16.0089
1204	0.189123	16.0198	1204	0.363222	16.0156	1204	0.052707	16.0155
1205	0.189475	16.0264	1205	0.357768	16.0223	1205	0.052602	16.0221
1206	0.189783	16.0331	1206	0.352842	16.0289	1206	0.052498	16.0288
1207	0.190087	16.0397	1207	0.34755	16.0356	1207	0.05234	16.0354
1208	0.190333	16.0463	1208	0.342594	16.0422	1208	0.052144	16.042
1209	0.19037	16.053	1209	0.337319	16.0488	1209	0.051992	16.0487
1210	0.190412	16.0598	1210	0.33255	16.0557	1210	0.051873	16.0553
1211	0.190594	16.0665	1211	0.327546	16.0623	1211	0.051742	16.0622
1212	0.190773	16.0731	1212	0.322972	16.069	1212	0.051543	16.0688
1213	0.190885	16.0798	1213	0.318092	16.0756	1213	0.051376	16.0755
1214	0.190983	16.0864	1214	0.3135	16.0822	1214	0.05121	16.0821
1215	0.191032	16.093	1215	0.308465	16.0889	1215	0.051048	16.0887
1216	0.191069	16.0997	1216	0.303952	16.0955	1216	0.050852	16.0954
1217	0.190981	16.1063	1217	0.299136	16.1022	1217	0.05067	16.102
1218	0.190845	16.1132	1218	0.294803	16.109	1218	0.050527	16.1086
1219	0.190781	16.1198	1219	0.290157	16.1157	1219	0.05038	16.1155
1220	0.190677	16.1264	1220	0.285978	16.1223	1220	0.050216	16.1222
1221	0.190429	16.1331	1221	0.281405	16.1289	1221	0.050069	16.1288
1222	0.190136	16.1397	1222	0.277263	16.1356	1222	0.049935	16.1354
1223	0.189897	16.1464	1223	0.272952	16.1422	1223	0.049788	16.1421
1224	0.189719	16.153	1224	0.268936	16.1489	1224	0.049679	16.1487
1225	0.189537	16.1596	1225	0.264939	16.1555	1225	0.049569	16.1553
1226	0.189304	16.1665	1226	0.261002	16.1623	1226	0.049471	16.162
1227	0.189128	16.1731	1227	0.257109	16.169	1227	0.04936	16.1688
1228	0.188937	16.1798	1228	0.253133	16.1756	1228	0.049216	16.1755
1229	0.188781	16.1864	1229	0.249398	16.1823	1229	0.049056	16.1821
1230	0.18863	16.1931	1230	0.245477	16.1889	1230	0.048876	16.1887
1231	0.1885	16.1997	1231	0.242014	16.1956	1231	0.048671	16.1954
1232	0.188365	16.2063	1232	0.23831	16.2022	1232	0.048504	16.202
1233	0.188205	16.213	1233	0.23495	16.2088	1233	0.048323	16.2087
1234	0.187756	16.2198	1234	0.231309	16.2157	1234	0.048125	16.2153
1235	0.187282	16.2265	1235	0.228008	16.2223	1235	0.047889	16.2222
1236	0.186767	16.2331	1236	0.224373	16.229	1236	0.047686	16.2288
1237	0.186229	16.2397	1237	0.221175	16.2356	1237	0.047509	16.2355
1238	0.18578	16.2464	1238	0.217837	16.2422	1238	0.047342	16.2421
1239	0.185341	16.253	1239	0.214803	16.2489	1239	0.047117	16.2487
1240	0.18483	16.2597	1240	0.211638	16.2555	1240	0.046912	16.2554
1241	0.184266	16.2663	1241	0.208698	16.2621	1241	0.046709	16.262
1242	0.183693	16.2732	1242	0.205567	16.269	1242	0.046525	16.2686
1243	0.183086	16.2798	1243	0.202719	16.2756	1243	0.046316	16.2755
1244	0.182644	16.2864	1244	0.19981	16.2823	1244	0.046124	16.2821
1245	0.182155	16.2931	1245	0.197193	16.2889	1245	0.04591	16.2888
1246	0.181697	16.2997	1246	0.19455	16.2956	1246	0.045685	16.2954
1247	0.181151	16.3064	1247	0.192074	16.3022	1247	0.045404	16.3021
1248	0.180544	16.313	1248	0.189413	16.3088	1248	0.045124	16.3087
1249	0.179829	16.3196	1249	0.186919	16.3155	1249	0.044864	16.3153
1250	0.179188	16.3265	1250	0.184245	16.3223	1250	0.044585	16.322
1251	0.178421	16.3331	1251	0.181661	16.329	1251	0.044317	16.3288
1252	0.177678	16.3398	1252	0.179136	16.3356	1252	0.044041	16.3355
1253	0.176749	16.3464	1253	0.176593	16.3422	1253	0.043781	16.3421
1254	0.175886	16.353	1254	0.174118	16.3489	1254	0.04349	16.3487
1255	0.17504	16.3597	1255	0.171553	16.3555	1255	0.043227	16.3554
1256	0.17426	16.3663	1256	0.169147	16.3622	1256	0.042934	16.362
1257	0.173391	16.373	1257	0.166559	16.3688	1257	0.042671	16.3686
1258	0.172556	16.3798	1258	0.164291	16.3756	1258	0.042394	16.3753
1259	0.171667	16.3865	1259	0.161834	16.3823	1259	0.042148	16.3821
1260	0.170796	16.3931	1260	0.159733	16.3889	1260	0.041869	16.3888
1261	0.169966	16.3997	1261	0.157435	16.3956	1261	0.041591	16.3954
1262	0.169133	16.4064	1262	0.155384	16.4022	1262	0.041286	16.4021
1263	0.168422	16.413	1263	0.153193	16.4089	1263	0.041007	16.4087
1264	0.16768	16.4196	1264	0.15121	16.4155	1264	0.040701	16.4153
1265	0.166796	16.4263	1265	0.149026	16.4221	1265	0.040426	16.422
1266	0.165822	16.4331	1266	0.147119	16.4289	1266	0.040182	16.4286
1267	0.164995	16.4398	1267	0.14517	16.4356	1267	0.039955	16.4355
1268	0.164132	16.4464	1268	0.143378	16.4423	1268	0.039714	16.4421
1269	0.163288	16.4531	1269	0.14148	16.4489	1269	0.039497	16.4488
1270	0.162285	16.4597	1270	0.13974	16.4555	1270	0.039262	16.4554
1271	0.161398	16.4663	1271	0.137808	16.4622	1271	0.039032	16.462
1272	0.160497	16.473	1272	0.136003	16.4688	1272	0.038798	16.4687
1273	0.159632	16.4796	1273	0.134086	16.4754	1273	0.038571	16.4753
1274	0.15864	16.4865	1274	0.132284	16.4822	1274	0.038355	16.4819
1275	0.157834	16.4931	1275	0.130621	16.489	1275	0.038127	16.4888
1276	0.156996	16.4998	1276	0.128979	16.4956	1276	0.037886	16.4954
1277	0.156204	16.5064	1277	0.127342	16.5022	1277	0.037637	16.5021
1278	0.155228	16.513	1278	0.125684	16.5089	1278	0.037343	16.5087
1279	0.154386	16.5197	1279	0.124139	16.5155	1279	0.03701	16.5154
1280	0.153491	16.5263	1280	0.122511	16.5221	1280	0.036722	16.522
1281	0.152611	16.533	1281	0.121123	16.5288	1281	0.036423	16.5286
1282	0.151543	16.5398	1282	0.119605	16.5356	1282	0.036164	16.5353
1283	0.150488	16.5465	1283	0.118322	16.5423	1283	0.035912	16.5421
1284	0.14947	16.5531	1284	0.116941	16.5489	1284	0.035679	16.5488
1285	0.148427	16.5597	1285	0.115676	16.5556	1285	0.035424	16.5554
1286	0.147402	16.5664	1286	0.114343	16.5622	1286	0.035172	16.562
1287	0.146322	16.573	1287	0.113101	16.5688	1287	0.034896	16.5687
1288	0.145355	16.5796	1288	0.111704	16.5755	1288	0.034684	16.5753
1289	0.144278	16.5863	1289	0.110414	16.5821	1289	0.034466	16.582
1290	0.14334	16.5931	1290	0.109031	16.5889	1290	0.034264	16.5886
1291	0.142294	16.5998	1291	0.107785	16.5956	1291	0.034016	16.5955
1292	0.141422	16.6064	1292	0.106459	16.6023	1292	0.033764	16.6021
1293	0.14049	16.613	1293	0.105225	16.6089	1293	0.033434	16.6087
1294	0.139629	16.6197	1294	0.103921	16.6155	1294	0.033134	16.6154
1295	0.138673	16.6263	1295	0.102686	16.6222	1295	0.032824	16.622
1296	0.13776	16.633	1296	0.101408	16.6288	1296	0.03253	16.6287
1297	0.136706	16.6396	1297	0.10028	16.6354	1297	0.032246	16.6353
1298	0.135725	16.6465	1298	0.099115	16.6422	1298	0.031977	16.6419
1299	0.134668	16.6531	1299	0.098014	16.6489	1299	0.031697	16.6488
1300	0.133687	16.6597	1300	0.097065	16.6556	1300	0.031419	16.6554
1301	0.132714	16.6664	1301	0.096167	16.6622	1301	0.031147	16.6621
1302	0.131797	16.673	1302	0.095264	16.6688	1302	0.030858	16.6687
1303	0.13072	16.6796	1303	0.094337	16.6755	1303	0.030618	16.6753
1304	0.129687	16.6863	1304	0.093463	16.6821	1304	0.030364	16.682
1305	0.128671	16.6929	1305	0.092546	16.6888	1305	0.030109	16.6886
1306	0.1277	16.6998	1306	0.091626	16.6955	1306	0.029826	16.6953
1307	0.126838	16.7064	1307	0.090581	16.7023	1307	0.029555	16.7021
1308	0.125981	16.7131	1308	0.089741	16.7089	1308	0.029281	16.7087
1309	0.125283	16.7197	1309	0.088848	16.7156	1309	0.02902	16.7154
1310	0.12458	16.7263	1310	0.087923	16.7222	1310	0.028714	16.722
1311	0.123852	16.733	1311	0.086883	16.7288	1311	0.028446	16.7287
1312	0.123003	16.7396	1312	0.08602	16.7355	1312	0.028164	16.7353
1313	0.122383	16.7463	1313	0.085125	16.7421	1313	0.027906	16.7419
1314	0.12171	16.7531	1314	0.08432	16.7488	1314	0.027646	16.7486
1315	0.121106	16.7598	1315	0.083431	16.7556	1315	0.027422	16.7555
1316	0.120368	16.7664	1316	0.08268	16.7622	1316	0.027182	16.7621
1317	0.119716	16.773	1317	0.082002	16.7689	1317	0.026947	16.7687
1318	0.11904	16.7797	1318	0.081369	16.7755	1318	0.026706	16.7754
1319	0.118376	16.7863	1319	0.080648	16.7821	1319	0.026502	16.782
1320	0.117605	16.7929	1320	0.080002	16.7888	1320	0.026265	16.7886
1321	0.116954	16.7996	1321	0.079193	16.7954	1321	0.026049	16.7953
1322	0.116143	16.8064	1322	0.078424	16.8021	1322	0.02584	16.8019
1323	0.115371	16.8131	1323	0.077695	16.8089	1323	0.025637	16.8088
1324	0.114587	16.8197	1324	0.077006	16.8156	1324	0.02538	16.8154
1325	0.113857	16.8264	1325	0.076383	16.8222	1325	0.025127	16.8221
1326	0.113075	16.833	1326	0.075763	16.8288	1326	0.024898	16.8287
1327	0.112274	16.8396	1327	0.075094	16.8355	1327	0.024668	16.8353
1328	0.111398	16.8463	1328	0.074408	16.8421	1328	0.024434	16.842
1329	0.110499	16.8529	1329	0.073778	16.8487	1329	0.024199	16.8486
1330	0.109637	16.8598	1330	0.073096	16.8555	1330	0.023989	16.8552
1331	0.108755	16.8664	1331	0.072611	16.8622	1331	0.023748	16.8621
1332	0.108015	16.873	1332	0.072059	16.8689	1332	0.023524	16.8687
1333	0.10719	16.8797	1333	0.071543	16.8755	1333	0.023295	16.8754
1334	0.106381	16.8863	1334	0.071018	16.8822	1334	0.023117	16.882
1335	0.105526	16.893	1335	0.070526	16.8888	1335	0.02293	16.8887
1336	0.104815	16.8996	1336	0.069991	16.8955	1336	0.022754	16.8953
1337	0.104077	16.9062	1337	0.069507	16.9021	1337	0.022569	16.9019
1338	0.103385	16.9131	1338	0.068957	16.9088	1338	0.022388	16.9086
1339	0.102629	16.9197	1339	0.068459	16.9156	1339	0.022186	16.9154
1340	0.101862	16.9264	1340	0.067906	16.9222	1340	0.022026	16.9221
1341	0.100985	16.933	1341	0.067417	16.9289	1341	0.021849	16.9287
1342	0.100245	16.9397	1342	0.066911	16.9355	1342	0.021677	16.9353
1343	0.0995908	16.9463	1343	0.066411	16.9422	1343	0.021495	16.942
1344	0.0989723	16.9529	1344	0.0659	16.9488	1344	0.021323	16.9486
1345	0.0982422	16.9596	1345	0.065425	16.9554	1345	0.021122	16.9553
1346	0.0975662	16.9664	1346	0.064886	16.9621	1346	0.020932	16.9619
1347	0.0968788	16.9731	1347	0.064393	16.9689	1347	0.020764	16.9688
1348	0.0962766	16.9797	1348	0.063916	16.9756	1348	0.020609	16.9754
1349	0.0955116	16.9863	1349	0.063471	16.9822	1349	0.020433	16.9821
1350	0.0948259	16.993	1350	0.06312	16.9888	1350	0.020272	16.9887
1351	0.0942012	16.9996	1351	0.062787	16.9955	1351	0.020127	16.9953
1352	0.0935653	17.0063	1352	0.06238	17.0021	1352	0.01998	17.002
1353	0.0928615	17.0129	1353	0.06192	17.0087	1353	0.019814	17.0086
1354	0.0921665	17.0197	1354	0.061471	17.0154	1354	0.019643	17.0152
1355	0.0915332	17.0264	1355	0.061017	17.0222	1355	0.019461	17.0221
1356	0.0908696	17.033	1356	0.060615	17.0289	1356	0.019245	17.0287
1357	0.0902492	17.0397	1357	0.060181	17.0355	1357	0.019038	17.0354
1358	0.0896124	17.0463	1358	0.059802	17.0422	1358	0.018852	17.042
1359	0.0891695	17.053	1359	0.059416	17.0488	1359	0.018693	17.0486
1360	0.0886748	17.0596	1360	0.058991	17.0554	1360	0.018497	17.0553
1361	0.0882306	17.0662	1361	0.058501	17.0621	1361	0.018324	17.0619
1362	0.0877562	17.073	1362	0.058175	17.0688	1362	0.018133	17.0685
1363	0.087325	17.0797	1363	0.057912	17.0756	1363	0.017965	17.0754
1364	0.086845	17.0864	1364	0.057616	17.0822	1364	0.017772	17.0821
1365	0.0864381	17.093	1365	0.057236	17.0889	1365	0.017631	17.0887
1366	0.0859632	17.0996	1366	0.056909	17.0955	1366	0.017511	17.0953
1367	0.0854987	17.1063	1367	0.056594	17.1021	1367	0.017373	17.102
1368	0.084903	17.1129	1368	0.056284	17.1088	1368	0.017209	17.1086
1369	0.0843741	17.1195	1369	0.055836	17.1154	1369	0.017067	17.1152
1370	0.0838227	17.1264	1370	0.055442	17.1221	1370	0.016947	17.1219
1371	0.0833039	17.1331	1371	0.055106	17.1289	1371	0.016836	17.1288
1372	0.0826108	17.1397	1372	0.054766	17.1355	1372	0.016707	17.1354
1373	0.0819246	17.1463	1373	0.054421	17.1422	1373	0.016584	17.142
1374	0.0813025	17.153	1374	0.054119	17.1488	1374	0.016471	17.1487
1375	0.0807056	17.1596	1375	0.053854	17.1554	1375	0.016354	17.1553
1376	0.0801247	17.1662	1376	0.053592	17.1621	1376	0.016252	17.1619
1377	0.0795228	17.1729	1377	0.053279	17.1687	1377	0.016151	17.1686
1378	0.0790001	17.1797	1378	0.052969	17.1754	1378	0.016047	17.1752
1379	0.0784372	17.1864	1379	0.052789	17.1822	1379	0.01594	17.1821
1380	0.0778995	17.193	1380	0.0526	17.1889	1380	0.015816	17.1887
1381	0.0773057	17.1997	1381	0.052361	17.1955	1381	0.015669	17.1954
1382	0.0769172	17.2063	1382	0.052085	17.2021	1382	0.015532	17.202
1383	0.0765253	17.2129	1383	0.051821	17.2088	1383	0.015368	17.2086
1384	0.0761052	17.2196	1384	0.051571	17.2154	1384	0.015229	17.2153
1385	0.0755908	17.2262	1385	0.051295	17.222	1385	0.015093	17.2219
1386	0.0751373	17.233	1386	0.050933	17.2287	1386	0.014956	17.2285
1387	0.0746028	17.2397	1387	0.050629	17.2355	1387	0.014827	17.2354
1388	0.0741328	17.2464	1388	0.050319	17.2422	1388	0.014687	17.242
1389	0.0736738	17.253	1389	0.050026	17.2488	1389	0.014469	17.2487
1390	0.0732599	17.2596	1390	0.049722	17.2555	1390	0.014284	17.2553
1391	0.0726609	17.2663	1391	0.049479	17.2621	1391	0.01411	17.262
1392	0.0720723	17.2729	1392	0.049275	17.2687	1392	0.013969	17.2686
1393	0.0714608	17.2795	1393	0.049045	17.2754	1393	0.013855	17.2752
1394	0.0708793	17.2863	1394	0.048753	17.282	1394	0.013744	17.2819
1395	0.070378	17.293	1395	0.048529	17.2889	1395	0.013627	17.2887
1396	0.0699017	17.2997	1396	0.048302	17.2955	1396	0.013505	17.2954
1397	0.0695118	17.3063	1397	0.04809	17.3022	1397	0.013344	17.302
1398	0.0691172	17.313	1398	0.047814	17.3088	1398	0.013189	17.3087
1399	0.0686708	17.3196	1399	0.047547	17.3154	1399	0.013117	17.3153
1400	0.0682064	17.3262	1400	0.047263	17.3221	1400	0.013047	17.3219
1401	0.0679568	17.3329	1401	0.046973	17.3287	1401	0.012986	17.3286
1402	0.0676895	17.3396	1402	0.046639	17.3354	1402	0.01292	17.3352
1403	0.0673773	17.3464	1403	0.046306	17.3422	1403	0.012856	17.3421
1404	0.066982	17.353	1404	0.046034	17.3489	1404	0.012791	17.3487
1405	0.0665708	17.3596	1405	0.045777	17.3555	1405	0.012735	17.3553
1406	0.0661245	17.3663	1406	0.045591	17.3621	1406	0.012677	17.362
1407	0.0656943	17.3729	1407	0.045389	17.3688	1407	0.012646	17.3686
1408	0.0652498	17.3796	1408	0.045313	17.3754	1408	0.012611	17.3753
1409	0.0648668	17.3862	1409	0.045277	17.382	1409	0.012575	17.3819
1410	0.064478	17.393	1410	0.045228	17.3887	1410	0.012541	17.3885
1411	0.0640981	17.3997	1411	0.04512	17.3955	1411	0.012508	17.3954
1412	0.0636808	17.4063	1412	0.045064	17.4022	1412	0.012448	17.402
1413	0.0633268	17.413	1413	0.045036	17.4088	1413	0.012384	17.4087
1414	0.0629159	17.4196	1414	0.044984	17.4154	1414	0.012281	17.4153
1415	0.0625417	17.4262	1415	0.044896	17.4221	1415	0.012179	17.4219
1416	0.0622736	17.4329	1416	0.044821	17.4287	1416	0.012081	17.4286
1417	0.0620211	17.4395	1417	0.044716	17.4354	1417	0.011987	17.4352
1418	0.06167	17.4463	1418	0.044559	17.442	1418	0.011904	17.4419
1419	0.06134	17.453	1419	0.04427	17.4489	1419	0.01182	17.4487
1420	0.0610092	17.4597	1420	0.044027	17.4555	1420	0.01173	17.4553
1421	0.0606907	17.4663	1421	0.043794	17.4621	1421	0.011644	17.462
1422	0.0604302	17.4729	1422	0.043552	17.4688	1422	0.011591	17.4686
1423	0.0601969	17.4796	1423	0.043338	17.4754	1423	0.011543	17.4753
1424	0.0600374	17.4862	1424	0.043142	17.4821	1424	0.011523	17.4819
1425	0.0598509	17.4928	1425	0.042888	17.4887	1425	0.011494	17.4885
1426	0.0595383	17.4996	1426	0.042629	17.4953	1426	0.011454	17.4952
1427	0.0592039	17.5063	1427	0.042395	17.5022	1427	0.011406	17.502
1428	0.0590163	17.513	1428	0.042166	17.5088	1428	0.011326	17.5087
1429	0.0588439	17.5196	1429	0.042007	17.5155	1429	0.011213	17.5153
1430	0.0586861	17.5263	1430	0.041843	17.5221	1430	0.011114	17.522
1431	0.0585025	17.5329	1431	0.041722	17.5287	1431	0.011033	17.5286
1432	0.0582935	17.5395	1432	0.041597	17.5354	1432	0.010949	17.5352
1433	0.0580503	17.5462	1433	0.041362	17.542	1433	0.010859	17.5419
1434	0.0578452	17.5529	1434	0.041091	17.5487	1434	0.01078	17.5485
1435	0.0575891	17.5597	1435	0.040906	17.5555	1435	0.010698	17.5554
1436	0.0573764	17.5663	1436	0.040733	17.5622	1436	0.010622	17.562
1437	0.0571187	17.5729	1437	0.040573	17.5688	1437	0.010524	17.5686
1438	0.0568327	17.5796	1438	0.040405	17.5754	1438	0.01046	17.5753
1439	0.0564491	17.5862	1439	0.040282	17.5821	1439	0.010442	17.5819
1440	0.0560965	17.5929	1440	0.040207	17.5887	1440	0.010415	17.5886
1441	0.0556583	17.5995	1441	0.040108	17.5953	1441	0.010353	17.5952
1442	0.0552426	17.6062	1442	0.039931	17.602	1442	0.01029	17.6018
1443	0.0547594	17.613	1443	0.039821	17.6089	1443	0.010244	17.6087
1444	0.0542977	17.6196	1444	0.039767	17.6155	1444	0.010202	17.6153
1445	0.0539659	17.6263	1445	0.039709	17.6221	1445	0.010168	17.622
1446	0.0536532	17.6329	1446	0.039608	17.6288	1446	0.010135	17.6286
1447	0.053358	17.6396	1447	0.039516	17.6354	1447	0.010126	17.6353
1448	0.0530569	17.6462	1448	0.039419	17.6421	1448	0.010112	17.6419
1449	0.0527912	17.6528	1449	0.039301	17.6487	1449	0.01008	17.6485
1450	0.0525137	17.6596	1450	0.039143	17.6553	1450	0.010042	17.6552
1451	0.0522823	17.6663	1451	0.039022	17.6622	1451	0.010025	17.662
1452	0.0520236	17.673	1452	0.038965	17.6688	1452	0.010015	17.6687
1453	0.0518856	17.6796	1453	0.038901	17.6755	1453	0.009989	17.6753
1454	0.051766	17.6862	1454	0.038773	17.6821	1454	0.009955	17.682
1455	0.0514878	17.6929	1455	0.038646	17.6887	1455	0.00993	17.6886
1456	0.0511241	17.6995	1456	0.03851	17.6954	1456	0.009916	17.6952
1457	0.0508314	17.7062	1457	0.038365	17.702	1457	0.009903	17.7019
1458	0.0505715	17.7129	1458	0.038248	17.7087	1458	0.00987	17.7085
1459	0.0503121	17.7197	1459	0.038136	17.7155	1459	0.009844	17.7154
1460	0.0499819	17.7263	1460	0.037981	17.7222	1460	0.009826	17.722
1461	0.0497131	17.7329	1461	0.037791	17.7288	1461	0.009803	17.7286
1462	0.0494463	17.7396	1462	0.037615	17.7354	1462	0.009743	17.7353
1463	0.0491478	17.7462	1463	0.037436	17.7421	1463	0.009687	17.7419
1464	0.0487813	17.7528	1464	0.037321	17.7487	1464	0.009608	17.7486
1465	0.0485092	17.7595	1465	0.037251	17.7553	1465	0.009522	17.7552
1466	0.0482172	17.7662	1466	0.037205	17.762	1466	0.009406	17.7618
1467	0.0479037	17.773	1467	0.037085	17.7688	1467	0.009292	17.7687
1468	0.0476175	17.7796	1468	0.03695	17.7755	1468	0.009207	17.7753
1469	0.0473787	17.7863	1469	0.036776	17.7821	1469	0.009123	17.782
1470	0.0472106	17.7929	1470	0.036644	17.7888	1470	0.009058	17.7886
1471	0.0470493	17.7995	1471	0.036551	17.7954	1471	0.009003	17.7952
1472	0.0469591	17.8062	1472	0.036462	17.802	1472	0.008953	17.8019
1473	0.0468913	17.8128	1473	0.036402	17.8087	1473	0.008882	17.8085
1474	0.0468445	17.8195	1474	0.036321	17.8153	1474	0.008855	17.8151
1475	0.046789	17.8263	1475	0.036173	17.8222	1475	0.008843	17.822
1476	0.046825	17.833	1476	0.036048	17.8288	1476	0.008844	17.8287
1477	0.0468561	17.8396	1477	0.035991	17.8354	1477	0.008836	17.8353
1478	0.0468353	17.8462	1478	0.035933	17.8421	1478	0.008822	17.8419
1479	0.0468123	17.8529	1479	0.035848	17.8487	1479	0.008802	17.8486
1480	0.0467954	17.8595	1480	0.035718	17.8554	1480	0.008761	17.8552
1481	0.046774	17.8661	1481	0.035594	17.862	1481	0.008703	17.8618
1482	0.0466904	17.8728	1482	0.035483	17.8686	1482	0.00867	17.8685
1483	0.0465702	17.8797	1483	0.035343	17.8755	1483	0.008629	17.8754
1484	0.0464829	17.8863	1484	0.035191	17.8821	1484	0.008575	17.882
1485	0.0464046	17.8929	1485	0.035061	17.8888	1485	0.008488	17.8886
1486	0.0462966	17.8996	1486	0.034909	17.8954	1486	0.008411	17.8953
1487	0.0460452	17.9062	1487	0.034775	17.902	1487	0.008364	17.9019
1488	0.0457879	17.9128	1488	0.034659	17.9087	1488	0.008322	17.9085
1489	0.0454489	17.9195	1489	0.034602	17.9153	1489	0.008262	17.9152
1490	0.0451159	17.9262	1490	0.034579	17.922	1490	0.008198	17.9218
1491	0.0447818	17.933	1491	0.034546	17.9288	1491	0.008138	17.9287
1492	0.0444637	17.9396	1492	0.034443	17.9355	1492	0.008082	17.9353
1493	0.0440958	17.9462	1493	0.034344	17.9421	1493	0.008041	17.942
1494	0.0437133	17.9529	1494	0.034246	17.9487	1494	0.007992	17.9486
1495	0.0433516	17.9595	1495	0.034155	17.9554	1495	0.007987	17.9552
1496	0.0430317	17.9662	1496	0.034115	17.962	1496	0.008003	17.9619
1497	0.0428565	17.9728	1497	0.034078	17.9686	1497	0.007989	17.9685
1498	0.0426871	17.9795	1498	0.034003	17.9753	1498	0.007958	17.9751
1499	0.042618	17.9863	1499	0.033919	17.9821	1499	0.007943	17.982
1500	0.0425628	17.993	1500	0.03383	17.9888	1500	0.007923	17.9886
1501	0.0424794	17.9996	1501	0.033733	17.9954	1501	0.007903	17.9953
1502	0.0423546	18.0062	1502	0.033716	18.0021	1502	0.00788	18.0019
1503	0.0422982	18.0129	1503	0.033713	18.0087	1503	0.007867	18.0085
1504	0.0422465	18.0195	1504	0.033666	18.0153	1504	0.007846	18.0152
1505	0.0421676	18.0261	1505	0.033576	18.022	1505	0.007801	18.0218
1506	0.042058	18.0328	1506	0.033454	18.0286	1506	0.007738	18.0284
1507	0.0419593	18.0396	1507	0.033316	18.0355	1507	0.007687	18.0353
1508	0.0418854	18.0463	1508	0.033199	18.0421	1508	0.007655	18.042
1509	0.0417627	18.0529	1509	0.033081	18.0487	1509	0.007629	18.0486
1510	0.0414621	18.0596	1510	0.032967	18.0554	1510	0.007597	18.0552
1511	0.0411967	18.0662	1511	0.032828	18.062	1511	0.007565	18.0619
1512	0.0409694	18.0728	1512	0.032675	18.0687	1512	0.007493	18.0685
1513	0.0407501	18.0795	1513	0.032557	18.0753	1513	0.007411	18.0751
1514	0.0405396	18.0861	1514	0.032477	18.0819	1514	0.007362	18.0818
1515	0.0403414	18.093	1515	0.03234	18.0888	1515	0.007324	18.0886
1516	0.0400758	18.0996	1516	0.032213	18.0954	1516	0.007271	18.0953
1517	0.0397969	18.1062	1517	0.032109	18.1021	1517	0.007207	18.1019
1518	0.0395737	18.1129	1518	0.032011	18.1087	1518	0.007135	18.1086
1519	0.0393947	18.1195	1519	0.031957	18.1154	1519	0.007057	18.1152
1520	0.039362	18.1262	1520	0.031915	18.122	1520	0.007012	18.1218
1521	0.0393257	18.1328	1521	0.031909	18.1286	1521	0.007005	18.1285
1522	0.0392168	18.1394	1522	0.031893	18.1353	1522	0.007031	18.1351
1523	0.0390864	18.1463	1523	0.031871	18.1421	1523	0.007036	18.142
1524	0.0390144	18.1529	1524	0.031871	18.1488	1524	0.007028	18.1486
1525	0.0389638	18.1596	1525	0.031936	18.1554	1525	0.007035	18.1553
1526	0.03892	18.1662	1526	0.031988	18.1621	1526	0.007056	18.1619
1527	0.0388375	18.1728	1527	0.03198	18.1687	1527	0.00711	18.1685
1528	0.0386595	18.1795	1528	0.031949	18.1753	1528	0.007169	18.1752
1529	0.0384566	18.1861	1529	0.031875	18.182	1529	0.007209	18.1818
1530	0.0382861	18.1928	1530	0.031795	18.1886	1530	0.007232	18.1884
1531	0.038134	18.1996	1531	0.03173	18.1955	1531	0.007225	18.1953
1532	0.038027	18.2063	1532	0.031682	18.2021	1532	0.00723	18.202
1533	0.0379015	18.2129	1533	0.031597	18.2087	1533	0.007257	18.2086
1534	0.0377321	18.2195	1534	0.031507	18.2154	1534	0.007276	18.2152
1535	0.0375631	18.2262	1535	0.031451	18.222	1535	0.00725	18.2219
1536	0.0374659	18.2328	1536	0.031404	18.2287	1536	0.007215	18.2285
1537	0.0373792	18.2394	1537	0.03139	18.2353	1537	0.007158	18.2351
1538	0.0372792	18.2461	1538	0.031344	18.2419	1538	0.007104	18.2418
1539	0.0370861	18.2529	1539	0.031304	18.2488	1539	0.007045	18.2487
1540	0.0368858	18.2596	1540	0.031246	18.2554	1540	0.006964	18.2553
1541	0.0367246	18.2662	1541	0.03117	18.2621	1541	0.006887	18.2619
1542	0.0365948	18.2729	1542	0.031087	18.2687	1542	0.006833	18.2686
1543	0.0363795	18.2795	1543	0.031001	18.2753	1543	0.006783	18.2752
1544	0.0361529	18.2861	1544	0.030918	18.282	1544	0.006711	18.2818
1545	0.0358951	18.2928	1545	0.030837	18.2886	1545	0.006656	18.2885
1546	0.0356516	18.2994	1546	0.030742	18.2952	1546	0.006592	18.2951
1547	0.0354454	18.3063	1547	0.030657	18.3021	1547	0.006527	18.302
1548	0.0352692	18.3129	1548	0.030583	18.3087	1548	0.006516	18.3086
1549	0.0351289	18.3196	1549	0.030503	18.3154	1549	0.006531	18.3152
1550	0.0349617	18.3262	1550	0.030476	18.322	1550	0.006548	18.3219
1551	0.0347322	18.3328	1551	0.03046	18.3287	1551	0.006551	18.3285
1552	0.0344985	18.3395	1552	0.030403	18.3353	1552	0.006491	18.3352
1553	0.0343748	18.3461	1553	0.030331	18.3419	1553	0.006432	18.3418
1554	0.0342379	18.3527	1554	0.030255	18.3486	1554	0.00638	18.3484
1555	0.0340999	18.3596	1555	0.030183	18.3554	1555	0.006324	18.3553
1556	0.0339396	18.3662	1556	0.030134	18.3621	1556	0.006301	18.3619
1557	0.0337607	18.3729	1557	0.030093	18.3687	1557	0.006284	18.3686
1558	0.0335262	18.3795	1558	0.030077	18.3754	1558	0.0062	18.3752
1559	0.0333509	18.3862	1559	0.030043	18.382	1559	0.006109	18.3819
1560	0.0331228	18.3928	1560	0.029979	18.3886	1560	0.006037	18.3885
1561	0.0328996	18.3994	1561	0.029902	18.3953	1561	0.005964	18.3951
1562	0.0325851	18.4061	1562	0.02986	18.4019	1562	0.005926	18.4018
1563	0.0322861	18.4129	1563	0.02985	18.4088	1563	0.005888	18.4086
1564	0.0319849	18.4196	1564	0.029836	18.4154	1564	0.005874	18.4153
1565	0.0316923	18.4262	1565	0.029826	18.4221	1565	0.005879	18.4219
1566	0.0314034	18.4328	1566	0.029796	18.4287	1566	0.00588	18.4285
1567	0.0311254	18.4395	1567	0.029657	18.4353	1567	0.005906	18.4352
1568	0.0309338	18.4461	1568	0.02954	18.442	1568	0.005935	18.4418
1569	0.0307641	18.4528	1569	0.02947	18.4486	1569	0.00594	18.4485
1570	0.0306286	18.4594	1570	0.029402	18.4552	1570	0.005948	18.4551
1571	0.0304791	18.4663	1571	0.02941	18.4621	1571	0.005953	18.462
1572	0.0303931	18.4729	1572	0.029413	18.4688	1572	0.005964	18.4686
1573	0.0302839	18.4795	1573	0.029338	18.4754	1573	0.005992	18.4752
1574	0.0301939	18.4862	1574	0.029256	18.482	1574	0.006012	18.4819
1575	0.0301097	18.4928	1575	0.029155	18.4887	1575	0.00599	18.4885
1576	0.0300294	18.4994	1576	0.029065	18.4953	1576	0.005954	18.4952
1577	0.0299333	18.5061	1577	0.029082	18.5019	1577	0.005889	18.5018
1578	0.0298023	18.5127	1578	0.029097	18.5086	1578	0.005832	18.5084
1579	0.0296522	18.5196	1579	0.029045	18.5154	1579	0.005815	18.5153
1580	0.0295118	18.5262	1580	0.028966	18.5221	1580	0.0058	18.5219
1581	0.0293084	18.5329	1581	0.028855	18.5287	1581	0.005777	18.5286
1582	0.0291368	18.5395	1582	0.028787	18.5354	1582	0.005748	18.5352
1583	0.0289871	18.5461	1583	0.028763	18.542	1583	0.005698	18.5419
1584	0.0288328	18.5528	1584	0.028716	18.5486	1584	0.00564	18.5485
1585	0.0286544	18.5594	1585	0.028672	18.5553	1585	0.005602	18.5551
1586	0.028491	18.566	1586	0.028604	18.5619	1586	0.005555	18.5617
1587	0.0282126	18.5729	1587	0.028523	18.5688	1587	0.005503	18.5686
1588	0.0279231	18.5795	1588	0.028402	18.5754	1588	0.005449	18.5753
1589	0.0276072	18.5862	1589	0.028332	18.582	1589	0.005393	18.5819
1590	0.0273142	18.5928	1590	0.028314	18.5887	1590	0.005344	18.5885
1591	0.027061	18.5995	1591	0.028255	18.5953	1591	0.005305	18.5952
1592	0.026792	18.6061	1592	0.02817	18.6019	1592	0.005265	18.6018
1593	0.0265123	18.6127	1593	0.028105	18.6086	1593	0.005237	18.6084
1594	0.0262254	18.6194	1594	0.028028	18.6152	1594	0.00522	18.6151
1595	0.0259179	18.6262	1595	0.027958	18.6221	1595	0.005208	18.6219
1596	0.0255697	18.6329	1596	0.027899	18.6287	1596	0.005187	18.6286
1597	0.0253433	18.6395	1597	0.027847	18.6354	1597	0.00517	18.6352
1598	0.0251147	18.6462	1598	0.027858	18.642	1598	0.005173	18.6419
1599	0.0248894	18.6528	1599	0.027881	18.6486	1599	0.00517	18.6485
1600	0.0246205	18.6594	1600	0.027867	18.6553	1600	0.005178	18.6551
1601	0.0244008	18.6661	1601	0.027845	18.6619	1601	0.005189	18.6618
1602	0.0242177	18.6727	1602	0.027781	18.6685	1602	0.005198	18.6684
1603	0.0240423	18.6796	1603	0.027686	18.6754	1603	0.005205	18.6753
1604	0.0238485	18.6862	1604	0.027655	18.6821	1604	0.005186	18.6819
1605	0.023689	18.6928	1605	0.027673	18.6887	1605	0.005167	18.6885
1606	0.023411	18.6995	1606	0.027716	18.6953	1606	0.005191	18.6952
1607	0.0231467	18.7061	1607	0.027789	18.702	1607	0.00522	18.7018
1608	0.0229068	18.7128	1608	0.02781	18.7086	1608	0.005199	18.7085
1609	0.0226973	18.7194	1609	0.027716	18.7152	1609	0.005164	18.7151
1610	0.0226248	18.726	1610	0.02763	18.7219	1610	0.005111	18.7217
1611	0.0225541	18.7329	1611	0.027534	18.7288	1611	0.005059	18.7286
1612	0.022465	18.7396	1612	0.027464	18.7354	1612	0.005034	18.7352
1613	0.0223807	18.7462	1613	0.027448	18.742	1613	0.005022	18.7419
1614	0.0223004	18.7528	1614	0.027407	18.7487	1614	0.005041	18.7485
1615	0.0222162	18.7595	1615	0.027312	18.7553	1615	0.00507	18.7551
1616	0.0222228	18.7661	1616	0.027206	18.7619	1616	0.005055	18.7618
1617	0.0221909	18.7727	1617	0.027108	18.7686	1617	0.005011	18.7684
1618	0.022125	18.7794	1618	0.027044	18.7752	1618	0.005003	18.7751
1619	0.0220377	18.7862	1619	0.027054	18.7821	1619	0.00501	18.7819
1620	0.0218845	18.7929	1620	0.027059	18.7887	1620	0.005021	18.7886
1621	0.0217437	18.7995	1621	0.027115	18.7953	1621	0.00504	18.7952
1622	0.021547	18.8061	1622	0.027184	18.802	1622	0.005039	18.8018
1623	0.0212865	18.8128	1623	0.02724	18.8086	1623	0.005024	18.8085
1624	0.0210249	18.8194	1624	0.027303	18.8153	1624	0.005005	18.8151
1625	0.0207192	18.826	1625	0.027377	18.8219	1625	0.004997	18.8218
1626	0.0204753	18.8327	1626	0.027455	18.8285	1626	0.005009	18.8284
1627	0.0202436	18.8396	1627	0.027477	18.8354	1627	0.005046	18.8352
1628	0.0200373	18.8462	1628	0.027466	18.8421	1628	0.00508	18.8419
1629	0.0198399	18.8528	1629	0.027435	18.8487	1629	0.005065	18.8485
1630	0.0196179	18.8595	1630	0.027327	18.8553	1630	0.005046	18.8552
1631	0.0193334	18.8661	1631	0.027205	18.862	1631	0.005022	18.8618
1632	0.0191027	18.8727	1632	0.027117	18.8686	1632	0.004999	18.8684
1633	0.0189485	18.8794	1633	0.027024	18.8752	1633	0.004995	18.8751
1634	0.018818	18.886	1634	0.02695	18.8819	1634	0.004991	18.8817
1635	0.0186448	18.8929	1635	0.02687	18.8887	1635	0.004958	18.8886
1636	0.0184649	18.8995	1636	0.026758	18.8954	1636	0.00492	18.8952
1637	0.0184089	18.9062	1637	0.026669	18.902	1637	0.004898	18.9019
1638	0.0183822	18.9128	1638	0.026628	18.9086	1638	0.004885	18.9085
1639	0.0182985	18.9194	1639	0.026635	18.9153	1639	0.004894	18.9151
1640	0.018175	18.9261	1640	0.026624	18.9219	1640	0.004886	18.9218
1641	0.018097	18.9327	1641	0.026579	18.9286	1641	0.004878	18.9284
1642	0.0180235	18.9393	1642	0.026497	18.9352	1642	0.004874	18.9351
1643	0.0178987	18.9462	1643	0.026413	18.9421	1643	0.004848	18.9419
1644	0.0177252	18.9529	1644	0.026357	18.9487	1644	0.004812	18.9486
1645	0.0176454	18.9595	1645	0.02632	18.9553	1645	0.004797	18.9552
1646	0.017573	18.9661	1646	0.026272	18.962	1646	0.004798	18.9618
1647	0.0173716	18.9728	1647	0.026208	18.9686	1647	0.004786	18.9685
1648	0.0170622	18.9794	1648	0.026102	18.9752	1648	0.004772	18.9751
1649	0.0168389	18.986	1649	0.025984	18.9819	1649	0.004775	18.9817
1650	0.0167353	18.9927	1650	0.025945	18.9885	1650	0.004772	18.9884
1651	0.0166161	18.9995	1651	0.025902	18.9954	1651	0.004766	18.9952
1652	0.016416	19.0062	1652	0.025882	19.002	1652	0.004765	19.0019
1653	0.0162541	19.0128	1653	0.025911	19.0087	1653	0.004768	19.0085
1654	0.0160731	19.0195	1654	0.02587	19.0153	1654	0.004759	19.0152
1655	0.0158958	19.0261	1655	0.02578	19.0219	1655	0.004742	19.0218
1656	0.0156934	19.0327	1656	0.025726	19.0286	1656	0.004717	19.0284
1657	0.0155195	19.0394	1657	0.025672	19.0352	1657	0.004687	19.0351
1658	0.0154359	19.046	1658	0.02564	19.0419	1658	0.004613	19.0417
1659	0.0153371	19.0529	1659	0.025653	19.0487	1659	0.004543	19.0485
1660	0.0151088	19.0595	1660	0.025688	19.0554	1660	0.004534	19.0552
1661	0.0148744	19.0661	1661	0.025766	19.062	1661	0.004535	19.0618
1662	0.0147058	19.0728	1662	0.025812	19.0686	1662	0.004507	19.0685
1663	0.0145322	19.0794	1663	0.025742	19.0753	1663	0.004473	19.0751
1664	0.0144291	19.086	1664	0.025676	19.0819	1664	0.004449	19.0817
1665	0.0143281	19.0927	1665	0.025702	19.0885	1665	0.004419	19.0884
1666	0.014297	19.0993	1666	0.025751	19.0952	1666	0.004374	19.095
1667	0.0143107	19.1062	1667	0.025776	19.102	1667	0.004319	19.1019
1668	0.0142294	19.1128	1668	0.025782	19.1087	1668	0.004298	19.1085
1669	0.0140287	19.1195	1669	0.025729	19.1153	1669	0.004278	19.1152
1670	0.0138903	19.1261	1670	0.025659	19.1219	1670	0.004236	19.1218
1671	0.013785	19.1327	1671	0.025566	19.1286	1671	0.004211	19.1284
1672	0.0136802	19.1394	1672	0.025472	19.1352	1672	0.004206	19.1351
1673	0.0135517	19.146	1673	0.025476	19.1419	1673	0.004207	19.1417
1674	0.0134227	19.1527	1674	0.025546	19.1485	1674	0.004221	19.1484
1675	0.0133021	19.1595	1675	0.025557	19.1554	1675	0.004254	19.1552
1676	0.013148	19.1662	1676	0.025547	19.162	1676	0.004299	19.1619
1677	0.0129991	19.1728	1677	0.025576	19.1687	1677	0.004353	19.1685
1678	0.0129323	19.1794	1678	0.025618	19.1753	1678	0.004409	19.1751
1679	0.0129111	19.1861	1679	0.025673	19.1819	1679	0.004465	19.1818
1680	0.0128796	19.1927	1680	0.025656	19.1886	1680	0.004505	19.1884
1681	0.0127467	19.1994	1681	0.025637	19.1952	1681	0.004532	19.1951
1682	0.0126203	19.206	1682	0.025601	19.2019	1682	0.00456	19.2017
1683	0.0125861	19.2129	1683	0.025528	19.2087	1683	0.004594	19.2085
1684	0.0125566	19.2195	1684	0.025406	19.2154	1684	0.004625	19.2152
1685	0.0125083	19.2261	1685	0.025285	19.222	1685	0.00465	19.2218
1686	0.0124535	19.2328	1686	0.025237	19.2286	1686	0.004676	19.2285
1687	0.0123514	19.2394	1687	0.025203	19.2353	1687	0.004705	19.2351
1688	0.0122524	19.246	1688	0.02514	19.2419	1688	0.004736	19.2417
1689	0.0121176	19.2527	1689	0.025082	19.2485	1689	0.004757	19.2484
1690	0.0119408	19.2593	1690	0.025084	19.2552	1690	0.004772	19.255
1691	0.0119058	19.2662	1691	0.025077	19.262	1691	0.004778	19.2618
1692	0.0119064	19.2728	1692	0.025089	19.2687	1692	0.004789	19.2685
1693	0.0118452	19.2795	1693	0.025101	19.2753	1693	0.004792	19.2752
1694	0.011778	19.2861	1694	0.025102	19.2819	1694	0.00479	19.2818
1695	0.0117314	19.2927	1695	0.025096	19.2886	1695	0.00478	19.2884
1696	0.0116966	19.2994	1696	0.02501	19.2952	1696	0.004766	19.2951
1697	0.0116292	19.306	1697	0.024904	19.3019	1697	0.004754	19.3017
1698	0.0115235	19.3126	1698	0.024811	19.3085	1698	0.004755	19.3083
1699	0.0115281	19.3195	1699	0.0247	19.3154	1699	0.004767	19.3151
1700	0.0115788	19.3261	1700	0.024629	19.322	1700	0.004781	19.3219
1701	0.0115503	19.3328	1701	0.024582	19.3286	1701	0.004789	19.3285
1702	0.0114382	19.3394	1702	0.024515	19.3353	1702	0.004793	19.3351
1703	0.0113201	19.3461	1703	0.0244	19.3419	1703	0.004799	19.3418
1704	0.0111781	19.3527	1704	0.024298	19.3485	1704	0.00478	19.3484
1705	0.0110254	19.3593	1705	0.024217	19.3552	1705	0.004763	19.355
1706	0.0109422	19.366	1706	0.02415	19.3618	1706	0.004733	19.3617
1707	0.0108916	19.3728	1707	0.024131	19.3687	1707	0.004696	19.3685
1708	0.0108006	19.3795	1708	0.024132	19.3753	1708	0.004675	19.3752
1709	0.0107021	19.3861	1709	0.024155	19.382	1709	0.004659	19.3818
1710	0.0106634	19.3928	1710	0.024167	19.3886	1710	0.004629	19.3884
1711	0.0106538	19.3994	1711	0.024098	19.3952	1711	0.004594	19.3951
1712	0.0106728	19.406	1712	0.02404	19.4019	1712	0.00453	19.4017
1713	0.0106909	19.4127	1713	0.024052	19.4085	1713	0.004458	19.4084
1714	0.0107933	19.4193	1714	0.024069	19.4152	1714	0.004438	19.415
1715	0.0109205	19.4262	1715	0.024069	19.422	1715	0.00443	19.4218
1716	0.0109768	19.4328	1716	0.024063	19.4287	1716	0.004419	19.4285
1717	0.0110389	19.4394	1717	0.024005	19.4353	1717	0.004394	19.4351
1718	0.0111266	19.4461	1718	0.023937	19.4419	1718	0.004337	19.4418
1719	0.0111779	19.4527	1719	0.023879	19.4486	1719	0.004274	19.4484
1720	0.0111706	19.4594	1720	0.02383	19.4552	1720	0.004221	19.455
1721	0.0111632	19.466	1721	0.023851	19.4618	1721	0.004155	19.4617
1722	0.0111522	19.4726	1722	0.02389	19.4685	1722	0.004126	19.4683
1723	0.0110945	19.4795	1723	0.023898	19.4753	1723	0.004127	19.4751
1724	0.0109835	19.4861	1724	0.023873	19.482	1724	0.004106	19.4818
1725	0.0108694	19.4928	1725	0.023848	19.4886	1725	0.004076	19.4885
1726	0.0107331	19.4994	1726	0.023819	19.4953	1726	0.004065	19.4951
1727	0.0105237	19.5061	1727	0.023801	19.5019	1727	0.004078	19.5017
1728	0.0103681	19.5127	1728	0.023783	19.5085	1728	0.004094	19.5084
1729	0.0102657	19.5193	1729	0.023759	19.5152	1729	0.004145	19.515
1730	0.0101582	19.526	1730	0.023783	19.5218	1730	0.004206	19.5217
1731	0.010011	19.5328	1731	0.023804	19.5287	1731	0.004273	19.5284
1732	0.00988976	19.5395	1732	0.02384	19.5353	1732	0.004331	19.5352
1733	0.00985178	19.5461	1733	0.023887	19.5419	1733	0.004387	19.5418
1734	0.00980909	19.5527	1734	0.023963	19.5486	1734	0.004446	19.5484
1735	0.00978589	19.5594	1735	0.024043	19.5552	1735	0.004485	19.5551
1736	0.00978493	19.566	1736	0.024132	19.5619	1736	0.004518	19.5617
1737	0.00986454	19.5726	1737	0.024225	19.5685	1737	0.004512	19.5683
1738	0.00994777	19.5793	1738	0.024361	19.5751	1738	0.004487	19.575
1739	0.0100294	19.5862	1739	0.024522	19.582	1739	0.004452	19.5817
1740	0.0101157	19.5928	1740	0.024611	19.5886	1740	0.004436	19.5885
1741	0.0102578	19.5994	1741	0.024683	19.5953	1741	0.004425	19.5951
1742	0.0104159	19.6061	1742	0.024716	19.6019	1742	0.00441	19.6018
1743	0.0105664	19.6127	1743	0.024722	19.6086	1743	0.00437	19.6084
1744	0.0107336	19.6193	1744	0.024738	19.6152	1744	0.00432	19.615
1745	0.0108392	19.626	1745	0.024792	19.6218	1745	0.004303	19.6217
1746	0.0109048	19.6326	1746	0.024849	19.6285	1746	0.004327	19.6283
1747	0.0109683	19.6395	1747	0.024938	19.6353	1747	0.004371	19.6351
1748	0.0110509	19.6461	1748	0.024987	19.642	1748	0.004409	19.6418
1749	0.0111288	19.6527	1749	0.024979	19.6486	1749	0.004421	19.6485
1750	0.011223	19.6594	1750	0.024983	19.6552	1750	0.004387	19.6551
1751	0.0112963	19.666	1751	0.024955	19.6619	1751	0.004356	19.6617
1752	0.0113695	19.6727	1752	0.024944	19.6685	1752	0.004315	19.6684
1753	0.0114195	19.6793	1753	0.025016	19.6751	1753	0.004277	19.675
1754	0.0114784	19.6859	1754	0.025072	19.6818	1754	0.004264	19.6816
1755	0.0115562	19.6928	1755	0.025123	19.6887	1755	0.004234	19.6884
1756	0.0115998	19.6995	1756	0.025168	19.6953	1756	0.004175	19.6951
1757	0.0116281	19.7061	1757	0.025197	19.7019	1757	0.004124	19.7018
1758	0.0117059	19.7127	1758	0.025234	19.7086	1758	0.004114	19.7084
1759	0.0118015	19.7194	1759	0.025288	19.7152	1759	0.004113	19.7151
1760	0.0118794	19.726	1760	0.025342	19.7218	1760	0.004103	19.7217
1761	0.0119565	19.7326	1761	0.025398	19.7285	1761	0.004074	19.7283
1762	0.0119917	19.7393	1762	0.025438	19.7351	1762	0.004078	19.735
1763	0.0120126	19.7461	1763	0.025427	19.742	1763	0.004093	19.7417
1764	0.0120215	19.7528	1764	0.025422	19.7486	1764	0.004101	19.7485
1765	0.0120438	19.7594	1765	0.025397	19.7553	1765	0.004118	19.7551
1766	0.0121424	19.766	1766	0.02538	19.7619	1766	0.00412	19.7618
1767	0.0122599	19.7727	1767	0.025363	19.7685	1767	0.004107	19.7684
1768	0.0123404	19.7793	1768	0.025361	19.7752	1768	0.004084	19.775
1769	0.012462	19.786	1769	0.025385	19.7818	1769	0.004067	19.7817
1770	0.0125817	19.7926	1770	0.025425	19.7884	1770	0.004085	19.7883
1771	0.0127044	19.7995	1771	0.025503	19.7953	1771	0.004122	19.795
1772	0.0128534	19.8061	1772	0.025582	19.802	1772	0.004146	19.8018
1773	0.0130139	19.8127	1773	0.025663	19.8086	1773	0.004167	19.8084
1774	0.0131573	19.8194	1774	0.025776	19.8152	1774	0.004181	19.8151
1775	0.0132856	19.826	1775	0.02586	19.8219	1775	0.004198	19.8217
1776	0.0134024	19.8327	1776	0.025887	19.8285	1776	0.004226	19.8284
1777	0.0135064	19.8393	1777	0.025897	19.8351	1777	0.004277	19.835
1778	0.0135744	19.8459	1778	0.025896	19.8418	1778	0.004324	19.8416
1779	0.0136941	19.8528	1779	0.025889	19.8486	1779	0.004323	19.8483
1780	0.0138311	19.8594	1780	0.025899	19.8553	1780	0.004315	19.8551
1781	0.0139349	19.8661	1781	0.025916	19.8619	1781	0.004332	19.8618
1782	0.0140298	19.8727	1782	0.025937	19.8686	1782	0.004358	19.8684
1783	0.0141608	19.8793	1783	0.025945	19.8752	1783	0.004345	19.875
1784	0.0143077	19.886	1784	0.025861	19.8818	1784	0.004309	19.8817
1785	0.0144334	19.8926	1785	0.025786	19.8885	1785	0.004258	19.8883
1786	0.0145398	19.8993	1786	0.02577	19.8951	1786	0.004204	19.895
1787	0.0146143	19.9061	1787	0.025753	19.902	1787	0.004161	19.9017
1788	0.0146562	19.9128	1788	0.025782	19.9086	1788	0.004152	19.9085
1789	0.0145957	19.9194	1789	0.025824	19.9153	1789	0.004177	19.9151
1790	0.0145352	19.926	1790	0.025786	19.9219	1790	0.004198	19.9217
1791	0.0145359	19.9327	1791	0.025718	19.9285	1791	0.004187	19.9284
1792	0.0146145	19.9393	1792	0.025698	19.9352	1792	0.004143	19.935
1793	0.0146704	19.9459	1793	0.02571	19.9418	1793	0.004131	19.9417
1794	0.0147423	19.9526	1794	0.025764	19.9485	1794	0.004158	19.9483
1795	0.014841	19.9594	1795	0.025804	19.9553	1795	0.004184	19.955
1796	0.0149754	19.9661	1796	0.025835	19.9619	1796	0.004196	19.9618
1797	0.0151558	19.9727	1797	0.025867	19.9686	1797	0.004188	19.9684
1798	0.0154664	19.9794	1798	0.025842	19.9752	1798	0.004185	19.9751
1799	0.0157635	19.986	1799	0.025781	19.9819	1799	0.004185	19.9817
1800	0.0160432	19.9926	1800	0.025777	19.9885	1800	0.004173	19.9884
1801	0.0162907	19.9993	1801	0.025871	19.9951	1801	0.004166	19.995
