# Supplementary material for: Design of amyloidogenic peptide traps
Source: Nat Chem Biol. 2024 Mar 19;20(8):981–90. doi: 10.1038/s41589-024-01578-5 (PMC11288891; doi:10.1038/s41589-024-01578-5)
Supplement: Supplementary file 15 — Statistical source data. [file 41589_2024_1578_MOESM15_ESM.xlsx]

## Sheet: Extended Data Fig. 5
A_GFP_P37	uv 395	vol 395	AB_GFP-P37_C37LHD284B9	uv 395	vol 395	ABC_GFP-P37_C37LHD284B9_LHD284A82	uv 395	vol 395
0	7.20305e-06	7.00557	0	0.001574	7.00061	0	0.001257	7.00034
1	7.44316e-05	7.0118	1	0.001796	7.00683	1	0.001297	7.00656
2	1.68071e-05	7.01802	2	0.002047	7.01305	2	0.001472	7.01278
3	5.04214e-05	7.02447	3	0.002244	7.01927	3	0.001755	7.019
4	3.60153e-05	7.03068	4	0.002323	7.0255	4	0.001969	7.02522
5	0	7.03691	5	0.002276	7.03172	5	0.001794	7.03168
6	0.000194482	7.04313	6	0.002323	7.03793	6	0.001667	7.03791
7	0.000420178	7.04936	7	0.002678	7.04439	7	0.001544	7.04413
8	0.00063627	7.05558	8	0.002903	7.05061	8	0.001349	7.05035
9	0.00084996	7.0618	9	0.002857	7.05683	9	0.001599	7.05657
10	0.000840356	7.06802	10	0.002746	7.06306	10	0.002172	7.0628
11	0.000737113	7.07439	11	0.002509	7.06927	11	0.002582	7.06902
12	0.000722706	7.0807	12	0.002283	7.0755	12	0.002737	7.07524
13	0.00066028	7.08693	13	0.002147	7.08172	13	0.002825	7.08162
14	0.000744316	7.09315	14	0.00209	7.08794	14	0.002817	7.08791
15	0.000926793	7.09937	15	0.002187	7.0944	15	0.002733	7.09413
16	0.00084996	7.1056	16	0.00224	7.10062	16	0.002578	7.10035
17	0.00066028	7.11182	17	0.001964	7.10684	17	0.002407	7.10658
18	0.000434584	7.11804	18	0.00167	7.11307	18	0.002323	7.1128
19	0.000362554	7.12426	19	0.001663	7.1193	19	0.002276	7.11902
20	0.000444188	7.13071	20	0.001695	7.12552	20	0.001906	7.12524
21	0.000725107	7.13693	21	0.001832	7.13173	21	0.001329	7.13147
22	0.00104924	7.14315	22	0.002104	7.13796	22	0.000935	7.13792
23	0.00128695	7.14937	23	0.002326	7.14417	23	0.000716	7.14414
24	0.00143821	7.1556	24	0.002161	7.15063	24	0.000585	7.15037
25	0.00153665	7.16182	25	0.001903	7.15685	25	0.000533	7.15659
26	0.00166631	7.16805	26	0.001821	7.16307	26	0.000501	7.16281
27	0.00180076	7.17427	27	0.001875	7.1693	27	0.000334	7.16903
28	0.00188	7.18055	28	0.001918	7.17552	28	0.000123	7.17526
29	0.00178396	7.18694	29	0.001878	7.18174	29	0.000119	7.18148
30	0.00169032	7.19317	30	0.001853	7.18797	30	0.000278	7.18779
31	0.00150304	7.1994	31	0.002	7.19419	31	0.000454	7.19415
32	0.00131096	7.20562	32	0.002011	7.20062	32	0.000469	7.20037
33	0.00125813	7.21183	33	0.001889	7.20686	33	0.000418	7.2066
34	0.00124853	7.21806	34	0.00214	7.21309	34	0.000458	7.21282
35	0.00119811	7.22428	35	0.002308	7.21932	35	0.00045	7.21904
36	0.00113328	7.23051	36	0.002276	7.22554	36	0.00041	7.22526
37	0.00111167	7.23695	37	0.002086	7.23176	37	0.000537	7.23149
38	0.00112128	7.24317	38	0.001918	7.23798	38	0.000728	7.23771
39	0.00112608	7.24939	39	0.00185	7.2442	39	0.000676	7.24417
40	0.00114769	7.25562	40	0.001771	7.25042	40	0.000752	7.25039
41	0.0011789	7.26184	41	0.001595	7.25687	41	0.001018	7.25661
42	0.00111887	7.26806	42	0.001584	7.26309	42	0.001309	7.26284
43	0.00099162	7.27429	43	0.001663	7.26931	43	0.001496	7.26905
44	0.000917189	7.28051	44	0.001548	7.27553	44	0.001627	7.27528
45	0.000912387	7.28674	45	0.001581	7.28176	45	0.001798	7.2815
46	0.000924392	7.29318	46	0.001875	7.28798	46	0.002021	7.28772
47	0.000977214	7.29941	47	0.00223	7.2942	47	0.002272	7.29397
48	0.00103244	7.30563	48	0.002362	7.30043	48	0.002407	7.30039
49	0.00103244	7.31186	49	0.002387	7.3068	49	0.002347	7.30661
50	0.00101803	7.31808	50	0.00252	7.3131	50	0.002057	7.31284
51	0.00108046	7.3243	51	0.002609	7.31933	51	0.001766	7.31906
52	0.00123652	7.33053	52	0.00248	7.32555	52	0.001587	7.32528
53	0.001419	7.33674	53	0.002344	7.33178	53	0.001488	7.3315
54	0.00153905	7.34319	54	0.002477	7.33799	54	0.001357	7.33773
55	0.00139739	7.34942	55	0.002699	7.34422	55	0.001269	7.34395
56	0.00120771	7.35564	56	0.002656	7.35044	56	0.001174	7.35041
57	0.00104444	7.36186	57	0.002574	7.35666	57	0.000991	7.35663
58	0.000926793	7.36809	58	0.002728	7.36311	58	0.000843	7.36285
59	0.000885976	7.37431	59	0.00286	7.36933	59	0.000959	7.36908
60	0.000859564	7.38053	60	0.00286	7.37556	60	0.001158	7.3753
61	0.000703498	7.38675	61	0.00267	7.38178	61	0.001261	7.38152
62	0.00049461	7.39298	62	0.002538	7.38801	62	0.001198	7.38775
63	0.000360153	7.39943	63	0.002674	7.39423	63	0.001106	7.39397
64	0.000333742	7.40566	64	0.002767	7.40045	64	0.001062	7.40019
65	0.000499412	7.41188	65	0.002753	7.40667	65	0.000951	7.40664
66	0.00073231	7.4181	66	0.002739	7.41296	66	0.000812	7.41286
67	0.000878773	7.42432	67	0.002753	7.41934	67	0.000744	7.41908
68	0.000890778	7.43055	68	0.002792	7.42558	68	0.000748	7.42531
69	0.000876372	7.43677	69	0.002821	7.43179	69	0.000688	7.43153
70	0.000869169	7.44299	70	0.00271	7.43802	70	0.000617	7.43775
71	0.000905184	7.44944	71	0.002742	7.44424	71	0.000668	7.44397
72	0.000950803	7.45566	72	0.002792	7.45046	72	0.000883	7.45019
73	0.000953204	7.46188	73	0.002635	7.45668	73	0.001086	7.45665
74	0.000837955	7.46811	74	0.002466	7.46291	74	0.001241	7.46287
75	0.000703498	7.47433	75	0.002319	7.46935	75	0.001424	7.4691
76	0.000624265	7.48055	76	0.002219	7.47558	76	0.001611	7.47532
77	0.000653077	7.48678	77	0.002104	7.4818	77	0.001822	7.48154
78	0.000770727	7.493	78	0.001943	7.48802	78	0.002005	7.48777
79	0.000830752	7.49922	79	0.001835	7.49424	79	0.002152	7.49399
80	0.000852361	7.50567	80	0.001893	7.50047	80	0.00222	7.50021
81	0.000797138	7.5119	81	0.001975	7.50669	81	0.002284	7.50643
82	0.000780331	7.51812	82	0.002007	7.51291	82	0.002371	7.51288
83	0.00075392	7.52435	83	0.001943	7.51915	83	0.002331	7.5191
84	0.000744316	7.53057	84	0.001871	7.52558	84	0.0022	7.52532
85	0.000864366	7.53679	85	0.001961	7.53182	85	0.002132	7.53154
86	0.000929194	7.54301	86	0.002022	7.53804	86	0.002176	7.53777
87	0.000931595	7.54923	87	0.001742	7.54426	87	0.002065	7.54399
88	0.000979615	7.55566	88	0.00148	7.55048	88	0.001699	7.55022
89	0.00105645	7.5619	89	0.001305	7.55671	89	0.001357	7.55644
90	0.00111407	7.56812	90	0.001118	7.56293	90	0.001022	7.56289
91	0.00124613	7.57435	91	0.000928	7.56915	91	0.000637	7.56912
92	0.00138299	7.58057	92	0.000803	7.5756	92	0.000442	7.57534
93	0.00155586	7.58679	93	0.000749	7.58182	93	0.000378	7.58156
94	0.00179116	7.59302	94	0.000652	7.58804	94	0.000406	7.58779
95	0.0018968	7.59924	95	0.000452	7.59427	95	0.000338	7.594
96	0.00172393	7.60546	96	0.000384	7.60049	96	0.000115	7.60023
97	0.00151504	7.61191	97	0.000649	7.60671	97	0	7.60645
98	0.00135177	7.61814	98	0.000939	7.61293	98	0.000267	7.61268
99	0.00124853	7.62436	99	0.001165	7.61916	99	0.000633	7.61912
100	0.00124373	7.63059	100	0.001402	7.62538	100	0.000935	7.62534
101	0.00129895	7.6368	101	0.001609	7.63183	101	0.001158	7.63157
102	0.00130615	7.64302	102	0.001842	7.63806	102	0.001162	7.63779
103	0.00121972	7.64926	103	0.002104	7.64428	103	0.001126	7.64401
104	0.00108286	7.65548	104	0.002337	7.6505	104	0.001094	7.65023
105	0.00099162	7.66185	105	0.002484	7.65672	105	0.00105	7.65646
106	0.00114529	7.66815	106	0.002441	7.66295	106	0.001054	7.66268
107	0.00126294	7.67437	107	0.002348	7.66918	107	0.000979	7.66909
108	0.00131096	7.68059	108	0.002251	7.67539	108	0.00076	7.67535
109	0.0014094	7.68682	109	0.002161	7.68184	109	0.000648	7.68158
110	0.00144541	7.69304	110	0.002079	7.68806	110	0.000736	7.68781
111	0.00123893	7.69926	111	0.002061	7.69428	111	0.000867	7.69403
112	0.00101323	7.70548	112	0.001975	7.70051	112	0.000991	7.70025
113	0.00101083	7.7117	113	0.001713	7.70673	113	0.00111	7.70647
114	0.00116689	7.71816	114	0.001498	7.71296	114	0.001138	7.7127
115	0.00127734	7.72438	115	0.001477	7.71918	115	0.001162	7.71892
116	0.00136858	7.73061	116	0.001523	7.7254	116	0.00107	7.72537
117	0.00148623	7.73683	117	0.001602	7.73162	117	0.001078	7.73158
118	0.00153425	7.74305	118	0.001667	7.73808	118	0.001265	7.73781
119	0.00150064	7.74927	119	0.001703	7.74431	119	0.001237	7.74403
120	0.00146222	7.7555	120	0.001681	7.75052	120	0.00113	7.75026
121	0.00161108	7.76172	121	0.001595	7.75674	121	0.001074	7.75648
122	0.00170952	7.76801	122	0.001531	7.76297	122	0.001015	7.7627
123	0.0016447	7.77439	123	0.001656	7.76919	123	0.000987	7.76892
124	0.00155826	7.78061	124	0.001875	7.77541	124	0.001018	7.77526
125	0.00152465	7.78683	125	0.001932	7.78163	125	0.001046	7.7816
126	0.00144541	7.79305	126	0.002057	7.78807	126	0.001198	7.78783
127	0.00133737	7.79928	127	0.002204	7.79431	127	0.001365	7.79405
128	0.00125333	7.8055	128	0.002136	7.80053	128	0.001369	7.80027
129	0.00113568	7.81172	129	0.002068	7.80675	129	0.001369	7.8065
130	0.00107326	7.81795	130	0.002014	7.81297	130	0.001321	7.81272
131	0.00112848	7.8244	131	0.001957	7.81919	131	0.001432	7.81894
132	0.00125813	7.83063	132	0.002007	7.82542	132	0.001568	7.82516
133	0.00127014	7.83685	133	0.002104	7.83164	133	0.001711	7.83161
134	0.00115009	7.84307	134	0.002068	7.83786	134	0.001878	7.83782
135	0.00120051	7.84929	135	0.001979	7.84432	135	0.001934	7.84405
136	0.00131816	7.85552	136	0.001821	7.85054	136	0.001957	7.85027
137	0.00134697	7.86174	137	0.001692	7.85677	137	0.001934	7.8565
138	0.0014238	7.86796	138	0.001781	7.86299	138	0.00189	7.86272
139	0.00145742	7.87419	139	0.001868	7.86922	139	0.001949	7.86895
140	0.0014214	7.88063	140	0.001954	7.87544	140	0.002077	7.87516
141	0.00128935	7.88685	141	0.001946	7.88166	141	0.001926	7.88143
142	0.00120531	7.89307	142	0.001824	7.88788	142	0.001643	7.88784
143	0.00128454	7.8993	143	0.001559	7.89426	143	0.001381	7.89407
144	0.00137338	7.90552	144	0.001301	7.90055	144	0.001182	7.90029
145	0.00123893	7.91174	145	0.001298	7.90677	145	0.001122	7.90652
146	0.00109486	7.91797	146	0.001448	7.91299	146	0.000987	7.91273
147	0.00105645	7.92419	147	0.001502	7.91922	147	0.000887	7.91896
148	0.000998824	7.93065	148	0.001434	7.92544	148	0.000931	7.92518
149	0.00104444	7.93686	149	0.001387	7.93166	149	0.000915	7.9314
150	0.00124133	7.94309	150	0.001326	7.93789	150	0.000855	7.93785
151	0.0014118	7.94931	151	0.001366	7.9441	151	0.000915	7.94407
152	0.00138779	7.95554	152	0.001692	7.95056	152	0.001086	7.95029
153	0.00133737	7.96176	153	0.002093	7.95678	153	0.001225	7.95652
154	0.00127494	7.96798	154	0.002057	7.96301	154	0.001269	7.96274
155	0.00122932	7.9742	155	0.001742	7.96924	155	0.001265	7.96896
156	0.00109486	7.98042	156	0.00143	7.97546	156	0.001349	7.97518
157	0.0009436	7.98688	157	0.001229	7.98168	157	0.001396	7.98141
158	0.000881174	7.99309	158	0.00114	7.9879	158	0.001341	7.98764
159	0.000845158	7.99932	159	0.00105	7.99412	159	0.001381	7.99408
160	0.00077793	8.00554	160	0.001068	8.00042	160	0.001381	8.00031
161	0.00087157	8.01176	161	0.001176	8.00679	161	0.001178	8.00653
162	0.00109727	8.01799	162	0.000975	8.01301	162	0.000995	8.01276
163	0.0011741	8.02421	163	0.000717	8.01923	163	0.001038	8.01898
164	0.00124373	8.03043	164	0.000936	8.02546	164	0.001134	8.0252
165	0.00138059	8.03689	165	0.001265	8.03168	165	0.001225	8.03142
166	0.00161589	8.04311	166	0.001427	8.03791	166	0.001309	8.03764
167	0.00182237	8.04934	167	0.00143	8.04413	167	0.001448	8.04409
168	0.00195683	8.05556	168	0.001437	8.05035	168	0.001564	8.05031
169	0.00198564	8.06178	169	0.001362	8.05681	169	0.001548	8.05654
170	0.0018848	8.068	170	0.001165	8.06303	170	0.00152	8.06276
171	0.00152705	8.07422	171	0.001011	8.06925	171	0.001731	8.06898
172	0.00114288	8.08045	172	0.001011	8.07548	172	0.002021	8.07521
173	0.000953204	8.08667	173	0.001029	8.08169	173	0.002009	8.08143
174	0.000845158	8.09312	174	0.000961	8.08792	174	0.001747	8.08765
175	0.000669884	8.09934	175	0.000867	8.09414	175	0.001595	8.09387
176	0.00054263	8.10556	176	0.000807	8.10036	176	0.001715	8.10032
177	0.000473001	8.11178	177	0.00086	8.10661	177	0.001822	8.10656
178	0.000432183	8.11801	178	0.000789	8.11304	178	0.001595	8.11278
179	0.000441787	8.12423	179	0.000814	8.11926	179	0.001365	8.119
180	0.000439386	8.13045	180	0.000921	8.12548	180	0.001317	8.12522
181	0.000528224	8.13667	181	0.000903	8.1317	181	0.001237	8.13144
182	0.000756321	8.14312	182	0.000699	8.13792	182	0.001086	8.13766
183	0.000965209	8.14935	183	0.000505	8.14415	183	0.00103	8.14388
184	0.00107326	8.15384	184	0.000527	8.15037	184	0.001249	8.15033
185	0.00116209	8.15384	185	0.000681	8.15361	185	0.00144	8.15358
186	0.00132536	8.15384	186	0.000731	8.15361	186	0.001412	8.15358
187	0.00161589	8.15444	187	0.000588	8.15361	187	0.001432	8.15358
188	0.00186559	8.15673	188	0.000591	8.15447	188	0.001965	8.15443
189	0.00204807	8.16075	189	0.000824	8.15704	189	0.002853	8.157
190	0.00224735	8.16307	190	0.001011	8.16153	190	0.003481	8.1613
191	0.0023578	8.16309	191	0.001477	8.16285	191	0.003768	8.16258
192	0.00240342	8.1642	192	0.002011	8.16296	192	0.004042	8.16269
193	0.00238421	8.16706	193	0.002136	8.16442	193	0.00436	8.16416
194	0.00237941	8.17164	194	0.002025	8.16762	194	0.004631	8.16736
195	0.00250426	8.17769	195	0.002029	8.17255	195	0.004993	8.17228
196	0.00251867	8.18391	196	0.002233	8.17872	196	0.005331	8.17845
197	0.00240102	8.19013	197	0.002624	8.18494	197	0.005518	8.18467
198	0.00231218	8.19656	198	0.002986	8.19116	198	0.005439	8.19089
199	0.00224495	8.2028	199	0.002939	8.19739	199	0.004802	8.19711
200	0.00217532	8.20904	200	0.002624	8.20361	200	0.004034	8.20356
201	0.0021249	8.21528	201	0.002068	8.20983	201	0.003517	8.20979
202	0.00202166	8.22153	202	0.001681	8.21628	202	0.002864	8.21604
203	0.00194242	8.22776	203	0.001735	8.2225	203	0.002296	8.22228
204	0.00184398	8.23401	204	0.001756	8.22872	204	0.002152	8.22852
205	0.0016399	8.24025	205	0.001516	8.23494	205	0.001842	8.23475
206	0.00145982	8.24649	206	0.0011	8.24117	206	0.001158	8.241
207	0.00127734	8.2528	207	0.000685	8.24739	207	0.000593	8.24724
208	0.00105645	8.25904	208	0.000287	8.25361	208	0.000557	8.25348
209	0.000881174	8.26526	209	7.17e-05	8.25983	209	0.000792	8.25979
210	0.000907585	8.27148	210	0.000341	8.26606	210	0.000943	8.26602
211	0.00100843	8.27771	211	0.000746	8.27251	211	0.001114	8.27224
212	0.00112368	8.28393	212	0.000896	8.27874	212	0.001452	8.27847
213	0.00124373	8.29015	213	0.000953	8.28496	213	0.001663	8.28469
214	0.00136138	8.29637	214	0.001047	8.29118	214	0.001496	8.29091
215	0.00145502	8.30275	215	0.000842	8.2974	215	0.001416	8.29714
216	0.00145742	8.30904	216	0.000688	8.30363	216	0.001528	8.30335
217	0.0014238	8.31526	217	0.000774	8.30985	217	0.001452	8.30974
218	0.00149583	8.32149	218	0.000853	8.31607	218	0.001162	8.31604
219	0.0016591	8.32771	219	0.001025	8.32252	219	0.001217	8.32226
220	0.0016423	8.33393	220	0.001004	8.32874	220	0.001496	8.32848
221	0.00161108	8.34016	221	0.000896	8.33496	221	0.00156	8.33471
222	0.00162549	8.34638	222	0.000903	8.34119	222	0.001599	8.34093
223	0.00170472	8.3526	223	0.000882	8.34741	223	0.001647	8.34715
224	0.00180557	8.35906	224	0.00086	8.35364	224	0.001659	8.35337
225	0.00177915	8.36528	225	0.001133	8.35985	225	0.00193	8.35959
226	0.00177915	8.3715	226	0.001412	8.36608	226	0.002371	8.36604
227	0.00185599	8.37773	227	0.001513	8.3723	227	0.002924	8.37226
228	0.00188	8.38395	228	0.001792	8.37875	228	0.003207	8.37848
229	0.00194002	8.39017	229	0.001964	8.38498	229	0.003095	8.38471
230	0.00213691	8.39639	230	0.002065	8.3912	230	0.003044	8.39093
231	0.00228097	8.40262	231	0.002065	8.39742	231	0.003223	8.39715
232	0.00228097	8.40891	232	0.002004	8.40365	232	0.003346	8.40338
233	0.00224015	8.41529	233	0.002075	8.40986	233	0.003449	8.4096
234	0.00230498	8.42151	234	0.002212	8.41609	234	0.003561	8.4159
235	0.00250426	8.42773	235	0.002341	8.42231	235	0.003386	8.42227
236	0.00250426	8.43396	236	0.002613	8.42873	236	0.003258	8.4285
237	0.00246585	8.44018	237	0.002911	8.43498	237	0.003211	8.43473
238	0.00227376	8.4464	238	0.002911	8.4412	238	0.002888	8.44095
239	0.00194002	8.45262	239	0.002778	8.44743	239	0.002566	8.44717
240	0.00169272	8.45884	240	0.002799	8.45365	240	0.002494	8.45339
241	0.00160148	8.4653	241	0.003029	8.45988	241	0.002514	8.45961
242	0.00156306	8.47153	242	0.003269	8.4661	242	0.002685	8.46584
243	0.00143821	8.47775	243	0.003172	8.47232	243	0.002904	8.47228
244	0.00124853	8.48398	244	0.003101	8.47854	244	0.002992	8.4785
245	0.00114769	8.49019	245	0.002885	8.48499	245	0.00296	8.48473
246	0.00127734	8.49642	246	0.002513	8.49122	246	0.002805	8.49095
247	0.0014046	8.50264	247	0.002416	8.49745	247	0.002554	8.49717
248	0.00167351	8.50886	248	0.002545	8.50367	248	0.002646	8.5034
249	0.00198564	8.51509	249	0.002846	8.50989	249	0.00292	8.50962
250	0.00207448	8.52153	250	0.003065	8.51611	250	0.002952	8.51584
251	0.00198804	8.52775	251	0.002918	8.52234	251	0.002932	8.52209
252	0.00199044	8.53397	252	0.002699	8.52856	252	0.002809	8.52852
253	0.00205767	8.54019	253	0.002792	8.53491	253	0.002562	8.53475
254	0.00207688	8.54642	254	0.002842	8.54122	254	0.002443	8.54097
255	0.00207688	8.55264	255	0.003079	8.54744	255	0.00251	8.54719
256	0.00210569	8.55886	256	0.003405	8.55367	256	0.00265	8.55341
257	0.00210089	8.56509	257	0.003348	8.55989	257	0.002896	8.55963
258	0.00205047	8.57154	258	0.002921	8.56612	258	0.003083	8.56586
259	0.00199044	8.57776	259	0.002459	8.57234	259	0.003103	8.57208
260	0.00194482	8.58399	260	0.002255	8.57856	260	0.003123	8.57853
261	0.00199525	8.59021	261	0.002262	8.58478	261	0.003151	8.58474
262	0.00208168	8.59644	262	0.002075	8.59124	262	0.003179	8.59097
263	0.00218012	8.60266	263	0.001767	8.59747	263	0.003231	8.59719
264	0.00231218	8.60888	264	0.001491	8.60369	264	0.003171	8.60342
265	0.00238181	8.6151	265	0.001176	8.60991	265	0.003055	8.60964
266	0.00227857	8.62132	266	0.000792	8.61614	266	0.003123	8.61586
267	0.00219693	8.62777	267	0.000448	8.62236	267	0.003195	8.62209
268	0.00222814	8.63399	268	0.000419	8.62858	268	0.003191	8.62831
269	0.00227617	8.64022	269	0.000541	8.6348	269	0.003163	8.63476
270	0.00226176	8.64644	270	0.00038	8.64107	270	0.003119	8.64099
271	0.00220173	8.65266	271	0.000326	8.64747	271	0.003079	8.64721
272	0.0021153	8.65889	272	0.000559	8.65369	272	0.003024	8.65343
273	0.00204567	8.66511	273	0.000792	8.65991	273	0.003024	8.65965
274	0.00194482	8.67133	274	0.001011	8.66614	274	0.003051	8.66588
275	0.00182717	8.67779	275	0.001298	8.67236	275	0.002956	8.6721
276	0.00186559	8.68401	276	0.001602	8.67858	276	0.002785	8.67832
277	0.00199284	8.69024	277	0.00185	8.68481	277	0.002952	8.68477
278	0.00204807	8.69646	278	0.002047	8.69102	278	0.003183	8.69099
279	0.00214651	8.70268	279	0.002068	8.69748	279	0.003083	8.69721
280	0.00228817	8.7089	280	0.002072	8.7037	280	0.003	8.70344
281	0.00243223	8.71512	281	0.001911	8.70993	281	0.003111	8.70966
282	0.00255708	8.72134	282	0.001753	8.71615	282	0.003234	8.7159
283	0.00248745	8.72756	283	0.00171	8.72237	283	0.003362	8.72212
284	0.00238901	8.73402	284	0.001563	8.72859	284	0.003565	8.72834
285	0.00247545	8.74024	285	0.001359	8.73482	285	0.003748	8.73457
286	0.00265553	8.74646	286	0.001437	8.74104	286	0.003744	8.74101
287	0.00270835	8.75268	287	0.001538	8.74727	287	0.003425	8.74725
288	0.00268434	8.75891	288	0.001484	8.75371	288	0.003151	8.75347
289	0.00257389	8.76513	289	0.001402	8.75993	289	0.003167	8.75969
290	0.00242263	8.77135	290	0.001416	8.76615	290	0.003123	8.76591
291	0.00232899	8.77757	291	0.001466	8.77238	291	0.002916	8.77214
292	0.00232899	8.78402	292	0.001484	8.7786	292	0.002757	8.77836
293	0.00249946	8.79025	293	0.001498	8.78483	293	0.002646	8.78458
294	0.00266753	8.79648	294	0.001728	8.79105	294	0.002825	8.79101
295	0.00266033	8.8027	295	0.00209	8.79727	295	0.003123	8.79725
296	0.00247065	8.80892	296	0.002129	8.80373	296	0.002952	8.80347
297	0.00233139	8.81514	297	0.002133	8.80995	297	0.002745	8.80969
298	0.00229777	8.82137	298	0.002301	8.81617	298	0.002777	8.81592
299	0.00229297	8.82759	299	0.002405	8.82239	299	0.002896	8.82213
300	0.00234339	8.83381	300	0.002434	8.82862	300	0.002829	8.82835
301	0.00237461	8.84026	301	0.002491	8.83484	301	0.002594	8.83457
302	0.00231698	8.84648	302	0.002584	8.84107	302	0.002471	8.84079
303	0.00226176	8.8527	303	0.002613	8.84728	303	0.002483	8.84725
304	0.00223295	8.85892	304	0.00252	8.8535	304	0.002053	8.85348
305	0.0021201	8.86515	305	0.002233	8.85996	305	0.001408	8.8597
306	0.00207928	8.87137	306	0.001932	8.86617	306	0.001361	8.86592
307	0.00225936	8.87759	307	0.001735	8.8724	307	0.001564	8.87214
308	0.00241542	8.88381	308	0.001613	8.87862	308	0.001504	8.87837
309	0.0025979	8.89021	309	0.00147	8.88485	309	0.001381	8.88458
310	0.00277558	8.89649	310	0.001118	8.89107	310	0.001504	8.89081
311	0.00279238	8.90272	311	0.000781	8.89729	311	0.001826	8.8972
312	0.00273236	8.90894	312	0.000703	8.90351	312	0.001989	8.90348
313	0.00277558	8.91517	313	0.000706	8.90997	313	0.001838	8.9097
314	0.00293404	8.92139	314	0.000703	8.91619	314	0.001774	8.91592
315	0.00316454	8.92761	315	0.000742	8.92241	315	0.001969	8.92215
316	0.00338303	8.93383	316	0.00071	8.92864	316	0.002164	8.92837
317	0.00337343	8.94005	317	0.000606	8.93487	317	0.002148	8.93459
318	0.00327739	8.9465	318	0.000817	8.94108	318	0.0022	8.94081
319	0.00314533	8.95272	319	0.00119	8.9473	319	0.0022	8.94703
320	0.00304689	8.95895	320	0.001685	8.95353	320	0.001977	8.95349
321	0.00309971	8.96517	321	0.002086	8.95975	321	0.001735	8.95972
322	0.00320296	8.97139	322	0.002065	8.9662	322	0.001838	8.96594
323	0.00320056	8.97762	323	0.001957	8.97242	323	0.002085	8.97216
324	0.00315974	8.98383	324	0.001864	8.97864	324	0.002491	8.97838
325	0.00316934	8.99006	325	0.001735	8.98486	325	0.002857	8.98461
326	0.00314533	8.99637	326	0.00176	8.99109	326	0.002825	8.99083
327	0.00310212	9.00273	327	0.001954	8.99731	327	0.00263	8.99705
328	0.00311652	9.00897	328	0.001803	9.00353	328	0.002514	9.00336
329	0.00310452	9.01519	329	0.00181	9.00975	329	0.002566	9.00972
330	0.00303008	9.0214	330	0.001882	9.01619	330	0.002765	9.01594
331	0.00286441	9.02763	331	0.00152	9.02243	331	0.002853	9.02216
332	0.00273236	9.03385	332	0.001312	9.02866	332	0.002483	9.02839
333	0.00267714	9.04007	333	0.001204	9.03488	333	0.001938	9.03461
334	0.00255708	9.0463	334	0.001136	9.0411	334	0.001404	9.04083
335	0.00237461	9.05274	335	0.001194	9.04733	335	0.001142	9.04705
336	0.00223055	9.05896	336	0.001237	9.05355	336	0.001221	9.05328
337	0.0021273	9.06519	337	0.001118	9.05977	337	0.001424	9.05973
338	0.00203606	9.07141	338	0.000982	9.06599	338	0.00148	9.06596
339	0.00203846	9.07764	339	0.000703	9.07244	339	0.0014	9.07219
340	0.0021129	9.08386	340	0.000498	9.07866	340	0.001392	9.0784
341	0.00225215	9.09008	341	0.000746	9.08488	341	0.001599	9.08463
342	0.0023626	9.0963	342	0.000996	9.09111	342	0.001918	9.09085
343	0.00239862	9.10255	343	0.001212	9.09733	343	0.002391	9.09708
344	0.00242983	9.10898	344	0.001183	9.10356	344	0.002749	9.10329
345	0.00251146	9.1152	345	0.001061	9.10978	345	0.002685	9.10954
346	0.00265793	9.12143	346	0.000979	9.11599	346	0.002491	9.11596
347	0.00280679	9.12765	347	0.000893	9.12237	347	0.002367	9.12218
348	0.00293404	9.13387	348	0.000814	9.12867	348	0.002359	9.12841
349	0.00299407	9.1401	349	0.000695	9.1349	349	0.002403	9.13463
350	0.0028212	9.14632	350	0.000491	9.14113	350	0.002578	9.14085
351	0.00266273	9.15254	351	0.000287	9.14735	351	0.002622	9.14708
352	0.00263392	9.15899	352	0.000194	9.15357	352	0.002498	9.1533
353	0.00264592	9.1652	353	0.000176	9.15979	353	0.002391	9.15952
354	0.00269634	9.17143	354	0.000358	9.16601	354	0.0023	9.16598
355	0.00274917	9.17765	355	0.000487	9.17223	355	0.002347	9.17219
356	0.00274917	9.18388	356	0.000588	9.17868	356	0.002455	9.17843
357	0.00276357	9.1901	357	0.000742	9.1849	357	0.002447	9.18464
358	0.00277077	9.19632	358	0.000857	9.19113	358	0.002359	9.19087
359	0.00273956	9.20254	359	0.000817	9.19735	359	0.002292	9.19709
360	0.00288602	9.20877	360	0.000803	9.20358	360	0.002065	9.20331
361	0.00301568	9.21522	361	0.000986	9.2098	361	0.001762	9.20954
362	0.00303969	9.22145	362	0.001072	9.21602	362	0.001707	9.21575
363	0.00301808	9.22767	363	0.001011	9.22224	363	0.002021	9.22221
364	0.00296286	9.23389	364	0.000964	9.22853	364	0.002315	9.22843
365	0.00277558	9.24011	365	0.001047	9.23492	365	0.002355	9.23465
366	0.00257389	9.24633	366	0.001158	9.24114	366	0.002471	9.24087
367	0.00255708	9.25256	367	0.001118	9.24737	367	0.002546	9.2471
368	0.0025955	9.25879	368	0.000896	9.25359	368	0.002574	9.25332
369	0.00248265	9.26523	369	0.000864	9.25981	369	0.002514	9.25954
370	0.00229057	9.27145	370	0.000925	9.26604	370	0.002471	9.26576
371	0.00213931	9.27767	371	0.000817	9.27226	371	0.00257	9.27222
372	0.00200245	9.28389	372	0.000993	9.27848	372	0.002626	9.27844
373	0.00196163	9.29012	373	0.001265	9.28492	373	0.002308	9.28467
374	0.00214171	9.29635	374	0.001312	9.29114	374	0.001989	9.29089
375	0.00240822	9.30257	375	0.001251	9.29737	375	0.001934	9.29711
376	0.00257149	9.30879	376	0.001108	9.30359	376	0.001918	9.30334
377	0.00253788	9.31501	377	0.00105	9.30982	377	0.001985	9.30956
378	0.00247305	9.32146	378	0.001409	9.31604	378	0.001814	9.31578
379	0.0025979	9.32769	379	0.001882	9.32226	379	0.001699	9.322
380	0.00271315	9.33391	380	0.002144	9.32848	380	0.001822	9.32845
381	0.00279478	9.34014	381	0.00228	9.33472	381	0.001938	9.33467
382	0.00291484	9.34636	382	0.002129	9.34116	382	0.001934	9.34089
383	0.00296526	9.35258	383	0.002	9.34739	383	0.001902	9.34712
384	0.00279478	9.3588	384	0.002122	9.35361	384	0.001858	9.35334
385	0.00264352	9.36502	385	0.002258	9.35983	385	0.00179	9.35956
386	0.00257629	9.37146	386	0.002423	9.36605	386	0.001643	9.36578
387	0.00248745	9.3777	387	0.002645	9.37228	387	0.001428	9.372
388	0.00238901	9.38392	388	0.002645	9.3785	388	0.00152	9.37846
389	0.00226656	9.39014	389	0.002498	9.38472	389	0.001902	9.38469
390	0.00223055	9.39636	390	0.002452	9.39117	390	0.002057	9.39092
391	0.00208648	9.40258	391	0.002495	9.39739	391	0.002005	9.39713
392	0.0018944	9.40881	392	0.00252	9.40361	392	0.002013	9.40335
393	0.00175514	9.41503	393	0.002337	9.40984	393	0.002224	9.40957
394	0.00163029	9.42125	394	0.002029	9.41606	394	0.002518	9.4158
395	0.00153185	9.4277	395	0.001824	9.42228	395	0.002709	9.42202
396	0.00146222	9.43393	396	0.001728	9.4285	396	0.002805	9.42824
397	0.00147663	9.44016	397	0.001592	9.43473	397	0.003032	9.43469
398	0.00154385	9.44638	398	0.001488	9.44095	398	0.00327	9.44091
399	0.00158707	9.4526	399	0.001402	9.4474	399	0.003242	9.44713
400	0.00157267	9.45882	400	0.001402	9.45363	400	0.003306	9.45336
401	0.00169272	9.46504	401	0.001423	9.45985	401	0.003453	9.45958
402	0.00184638	9.47127	402	0.001333	9.46608	402	0.003266	9.4658
403	0.00192322	9.47766	403	0.001419	9.47231	403	0.002912	9.47203
404	0.00203366	9.48394	404	0.00167	9.47852	404	0.002773	9.47825
405	0.0021153	9.49016	405	0.001839	9.48475	405	0.002769	9.48466
406	0.00209129	9.49638	406	0.001835	9.49096	406	0.00263	9.49093
407	0.00199765	9.50261	407	0.001785	9.49741	407	0.002391	9.49715
408	0.00185839	9.50883	408	0.001803	9.50363	408	0.002272	9.50338
409	0.00176715	9.51505	409	0.001893	9.50985	409	0.002216	9.5096
410	0.00179356	9.52127	410	0.001835	9.51608	410	0.002013	9.51582
411	0.00183678	9.5275	411	0.001706	9.5223	411	0.00177	9.52205
412	0.00181037	9.53395	412	0.001642	9.52852	412	0.00187	9.52826
413	0.00175755	9.54018	413	0.001362	9.53474	413	0.001973	9.53449
414	0.00173113	9.5464	414	0.001086	9.54097	414	0.001818	9.54094
415	0.00182237	9.55262	415	0.001362	9.54719	415	0.001782	9.54715
416	0.00195203	9.55884	416	0.001688	9.55365	416	0.001993	9.55338
417	0.00192802	9.56506	417	0.001584	9.55988	417	0.002148	9.5596
418	0.00191361	9.57129	418	0.001373	9.56609	418	0.002105	9.56582
419	0.00205047	9.57751	419	0.001126	9.57232	419	0.001981	9.57205
420	0.00213931	9.58383	420	0.000953	9.57854	420	0.001926	9.57827
421	0.00227136	9.59018	421	0.000907	9.58476	421	0.002029	9.58449
422	0.00243943	9.5964	422	0.000939	9.59098	422	0.002168	9.59083
423	0.00264112	9.60262	423	0.001086	9.5972	423	0.002256	9.59717
424	0.00277318	9.60885	424	0.001068	9.60364	424	0.002288	9.6034
425	0.00268674	9.61507	425	0.000516	9.60988	425	0.002121	9.60962
426	0.0025907	9.62129	426	7.17e-06	9.6161	426	0.00179	9.61584
427	0.00271555	9.62751	427	0	9.62232	427	0.001611	9.62206
428	0.00287882	9.63374	428	7.53e-05	9.62855	428	0.001579	9.62828
429	0.00285961	9.6402	429	0.000104	9.63477	429	0.001528	9.63451
430	0.00277318	9.64642	430	9.32e-05	9.64099	430	0.001432	9.64073
431	0.00263872	9.65264	431	3.58e-05	9.64721	431	0.001277	9.64717
432	0.00266513	9.65886	432	4.66e-05	9.65343	432	0.001114	9.65339
433	0.00268674	9.66509	433	0.000154	9.65989	433	0.000991	9.65962
434	0.00257149	9.67131	434	0.000441	9.66612	434	0.001026	9.66584
435	0.00254748	9.67753	435	0.000703	9.67234	435	0.001158	9.67207
436	0.00261711	9.68375	436	0.000893	9.67857	436	0.001408	9.67829
437	0.00264592	9.69	437	0.001039	9.68478	437	0.001591	9.68451
438	0.00263392	9.69642	438	0.001111	9.69101	438	0.001627	9.69073
439	0.00266273	9.70264	439	0.001208	9.69723	439	0.001663	9.69699
440	0.00270835	9.70887	440	0.001344	9.70344	440	0.001695	9.70341
441	0.00265312	9.71509	441	0.001491	9.70983	441	0.001639	9.70964
442	0.00251627	9.72131	442	0.001563	9.71612	442	0.001595	9.71586
443	0.00256909	9.72754	443	0.001674	9.72234	443	0.001703	9.72208
444	0.00272516	9.73376	444	0.001738	9.72857	444	0.001711	9.72831
445	0.00274917	9.73998	445	0.001713	9.73479	445	0.001762	9.73453
446	0.00275877	9.74644	446	0.001724	9.74101	446	0.001858	9.74075
447	0.00287642	9.75266	447	0.001624	9.74723	447	0.001842	9.74697
448	0.00298206	9.75888	448	0.001502	9.75345	448	0.001834	9.75342
449	0.00311172	9.7651	449	0.001412	9.75967	449	0.001667	9.75964
450	0.0032966	9.77133	450	0.001319	9.76613	450	0.001528	9.76586
451	0.00341665	9.77755	451	0.001215	9.77236	451	0.001667	9.77208
452	0.00340945	9.78377	452	0.001108	9.77858	452	0.001826	9.77831
453	0.00322457	9.78999	453	0.000939	9.7848	453	0.001798	9.78453
454	0.0030757	9.79621	454	0.000763	9.79102	454	0.001755	9.79076
455	0.00309251	9.80267	455	0.000706	9.79725	455	0.001599	9.79698
456	0.00312372	9.80889	456	0.000724	9.80347	456	0.001404	9.80321
457	0.00300848	9.81511	457	0.000878	9.80969	457	0.001432	9.80965
458	0.00285721	9.82134	458	0.001194	9.81599	458	0.001568	9.81588
459	0.00269634	9.82756	459	0.00147	9.82236	459	0.001794	9.8221
460	0.0025883	9.83378	460	0.00171	9.82858	460	0.001866	9.82832
461	0.00264592	9.84	461	0.001932	9.83481	461	0.001747	9.83455
462	0.00287642	9.84622	462	0.002115	9.84103	462	0.001552	9.84077
463	0.00309491	9.85268	463	0.002301	9.84725	463	0.001377	9.84699
464	0.00315974	9.8589	464	0.002452	9.85347	464	0.001544	9.85322
465	0.00319816	9.86513	465	0.002523	9.8597	465	0.001774	9.85966
466	0.00333982	9.87135	466	0.002491	9.86592	466	0.001993	9.86588
467	0.0035439	9.87757	467	0.002409	9.87237	467	0.002125	9.87211
468	0.00364955	9.8838	468	0.002147	9.8786	468	0.00214	9.87833
469	0.00367116	9.89002	469	0.00176	9.88482	469	0.002236	9.88455
470	0.00359432	9.89624	470	0.001394	9.89105	470	0.00255	9.89078
471	0.00345506	9.90245	471	0.001308	9.89727	471	0.002912	9.897
472	0.0033086	9.90891	472	0.001247	9.90349	472	0.003159	9.90322
473	0.00332061	9.91512	473	0.001039	9.90971	473	0.003191	9.90945
474	0.00344786	9.92135	474	0.000846	9.91594	474	0.002956	9.9159
475	0.00346707	9.92757	475	0.00071	9.92217	475	0.002896	9.92212
476	0.00335662	9.9338	476	0.000595	9.9286	476	0.002845	9.92835
477	0.00312853	9.94002	477	0.000552	9.93482	477	0.002594	9.93457
478	0.00302528	9.94625	478	0.000548	9.94105	478	0.002343	9.94079
479	0.00303008	9.95247	479	0.000695	9.94727	479	0.00216	9.94702
480	0.00308051	9.95892	480	0.000885	9.9535	480	0.001934	9.95324
481	0.00323417	9.96514	481	0.000774	9.95971	481	0.001826	9.95946
482	0.0033062	9.97137	482	0.000595	9.96594	482	0.001898	9.9659
483	0.00315974	9.97759	483	0.000595	9.97216	483	0.001957	9.97213
484	0.00296526	9.98382	484	0.000778	9.97862	484	0.00183	9.97835
485	0.00288362	9.99004	485	0.000957	9.98483	485	0.001611	9.98457
486	0.00280679	9.99626	486	0.00109	9.99106	486	0.001599	9.9908
487	0.00281399	10.0025	487	0.001194	9.99728	487	0.001818	9.99702
488	0.00291484	10.0087	488	0.00157	10.0035	488	0.002109	10.0032
489	0.00297966	10.0152	489	0.001943	10.0097	489	0.002315	10.0095
490	0.00294605	10.0214	490	0.002004	10.016	490	0.002395	10.0157
491	0.00281399	10.0276	491	0.001979	10.0222	491	0.002292	10.0221
492	0.00272035	10.0338	492	0.002036	10.0284	492	0.002081	10.0284
493	0.00275157	10.04	493	0.002083	10.0349	493	0.002077	10.0346
494	0.0028212	10.0463	494	0.001979	10.0411	494	0.002236	10.0408
495	0.00281399	10.0525	495	0.001882	10.0473	495	0.002308	10.047
496	0.00278758	10.0587	496	0.001878	10.0535	496	0.002148	10.0533
497	0.00271075	10.0651	497	0.002032	10.0597	497	0.001926	10.0595
498	0.00254028	10.0714	498	0.00186	10.066	498	0.001643	10.0657
499	0.00248265	10.0776	499	0.001516	10.0722	499	0.001404	10.0721
500	0.00251867	10.0838	500	0.001445	10.0784	500	0.001305	10.0784
501	0.00263152	10.0901	501	0.001588	10.0849	501	0.001265	10.0846
502	0.00267233	10.0963	502	0.001724	10.0911	502	0.001305	10.0908
503	0.00264352	10.1025	503	0.001824	10.0973	503	0.0015	10.097
504	0.00265793	10.1087	504	0.001918	10.1035	504	0.001667	10.1033
505	0.00271075	10.1149	505	0.00205	10.1098	505	0.001711	10.1095
506	0.00275157	10.1214	506	0.002151	10.116	506	0.00179	10.1157
507	0.00287402	10.1276	507	0.0021	10.1222	507	0.001977	10.1219
508	0.00304209	10.1338	508	0.002072	10.1284	508	0.002172	10.1284
509	0.00308531	10.1401	509	0.002172	10.1346	509	0.002431	10.1346
510	0.00309251	10.1463	510	0.002222	10.1411	510	0.002717	10.1408
511	0.0030565	10.1525	511	0.002187	10.1473	511	0.00288	10.1471
512	0.00302768	10.1587	512	0.002276	10.1535	512	0.002972	10.1533
513	0.00299887	10.165	513	0.002398	10.1598	513	0.002916	10.1595
514	0.00294845	10.1713	514	0.002495	10.166	514	0.002853	10.1657
515	0.00292924	10.1776	515	0.002545	10.1722	515	0.002821	10.1719
516	0.00295325	10.1839	516	0.00238	10.1784	516	0.002618	10.1783
517	0.00296526	10.1901	517	0.002176	10.1846	517	0.002391	10.1846
518	0.00289323	10.1963	518	0.002029	10.1911	518	0.002327	10.1908
519	0.00277558	10.2025	519	0.001928	10.1973	519	0.002176	10.1971
520	0.00272035	10.2087	520	0.001771	10.2035	520	0.002101	10.2033
521	0.00274196	10.215	521	0.001534	10.2098	521	0.002093	10.2095
522	0.00275157	10.2212	522	0.001204	10.216	522	0.002248	10.2157
523	0.002838	10.2276	523	0.000928	10.2222	523	0.002423	10.2219
524	0.00294365	10.2339	524	0.000731	10.2284	524	0.002467	10.2282
525	0.00290523	10.2401	525	0.00062	10.2347	525	0.002534	10.2346
526	0.00281159	10.2463	526	0.000731	10.2409	526	0.002805	10.2409
527	0.00269394	10.2525	527	0.001007	10.2473	527	0.003051	10.2471
528	0.00260751	10.2587	528	0.001226	10.2536	528	0.003044	10.2533
529	0.00266273	10.265	529	0.001222	10.2598	529	0.002932	10.2595
530	0.00280439	10.2712	530	0.001312	10.266	530	0.002737	10.2657
531	0.00284761	10.2775	531	0.001552	10.2722	531	0.002602	10.272
532	0.00284761	10.2839	532	0.001771	10.2784	532	0.002371	10.2782
533	0.00277318	10.2901	533	0.001789	10.2847	533	0.002136	10.2844
534	0.00266513	10.2963	534	0.00171	10.2909	534	0.002049	10.2909
535	0.00271315	10.3025	535	0.001638	10.2973	535	0.002113	10.2971
536	0.00291484	10.3088	536	0.001631	10.3036	536	0.002152	10.3033
537	0.00314533	10.315	537	0.001427	10.3098	537	0.00218	10.3095
538	0.00336143	10.3212	538	0.001115	10.316	538	0.002276	10.3157
539	0.00347908	10.3274	539	0.001054	10.3222	539	0.002522	10.322
540	0.00347667	10.3339	540	0.001147	10.3285	540	0.002769	10.3282
541	0.00347908	10.3401	541	0.001147	10.3347	541	0.002896	10.3344
542	0.0035367	10.3463	542	0.001097	10.3409	542	0.002936	10.3409
543	0.00360393	10.3525	543	0.001194	10.3471	543	0.002944	10.3471
544	0.00368316	10.3588	544	0.001362	10.3536	544	0.002924	10.3533
545	0.00368556	10.365	545	0.001448	10.3598	545	0.002809	10.3595
546	0.00357031	10.3712	546	0.00143	10.366	546	0.002709	10.3658
547	0.00350068	10.3774	547	0.001459	10.3722	547	0.002622	10.372
548	0.00344546	10.3837	548	0.001581	10.3785	548	0.002749	10.3782
549	0.00347908	10.3901	549	0.001627	10.3847	549	0.002829	10.3844
550	0.0035343	10.3963	550	0.00157	10.3909	550	0.003143	10.3907
551	0.00335902	10.4026	551	0.001692	10.3971	551	0.003581	10.3971
552	0.00309731	10.4088	552	0.00186	10.4034	552	0.003827	10.4033
553	0.00290283	10.415	553	0.002057	10.4098	553	0.003963	10.4095
554	0.00276837	10.4212	554	0.002233	10.416	554	0.004165	10.4158
555	0.00271075	10.4275	555	0.002434	10.4223	555	0.004404	10.422
556	0.00264592	10.4337	556	0.00267	10.4285	556	0.004615	10.4282
557	0.00260991	10.4401	557	0.002767	10.4347	557	0.004818	10.4344
558	0.00273956	10.4463	558	0.002753	10.4409	558	0.004782	10.4406
559	0.00278518	10.4526	559	0.002739	10.4472	559	0.004651	10.4471
560	0.00279959	10.4588	560	0.002642	10.4534	560	0.004269	10.4533
561	0.00304689	10.465	561	0.002394	10.4598	561	0.003911	10.4596
562	0.00336623	10.4712	562	0.002262	10.466	562	0.003827	10.4658
563	0.00360393	10.4775	563	0.0021	10.4723	563	0.003974	10.472
564	0.00367836	10.4837	564	0.00195	10.4785	564	0.00409	10.4782
565	0.00375279	10.4899	565	0.00176	10.4847	565	0.004106	10.4845
566	0.00375279	10.4964	566	0.001846	10.4909	566	0.00411	10.4907
567	0.00365195	10.5026	567	0.00209	10.4971	567	0.004245	10.4969
568	0.00346227	10.5088	568	0.002136	10.5034	568	0.004484	10.5033
569	0.00333261	10.515	569	0.002169	10.5096	569	0.00487	10.5096
570	0.0032918	10.5212	570	0.002423	10.516	570	0.005303	10.5158
571	0.00338784	10.5275	571	0.002688	10.5223	571	0.00561	10.522
572	0.00344306	10.5337	572	0.002868	10.5285	572	0.00586	10.5282
573	0.00323177	10.5399	573	0.003072	10.5347	573	0.005964	10.5345
574	0.00315254	10.5464	574	0.003215	10.5409	574	0.005944	10.5407
575	0.00322457	10.5526	575	0.003298	10.5472	575	0.005968	10.5469
576	0.00337823	10.5588	576	0.003154	10.5534	576	0.005904	10.5534
577	0.00346467	10.565	577	0.003194	10.5596	577	0.005725	10.5596
578	0.00346467	10.5713	578	0.003531	10.5661	578	0.005622	10.5658
579	0.00357992	10.5775	579	0.003624	10.5723	579	0.005462	10.572
580	0.00369036	10.5837	580	0.003549	10.5785	580	0.005128	10.5783
581	0.00355351	10.5899	581	0.003552	10.5847	581	0.004818	10.5845
582	0.00341425	10.5961	582	0.003556	10.5909	582	0.004643	10.5907
583	0.00357992	10.6026	583	0.003563	10.5972	583	0.004543	10.5969
584	0.00379121	10.6088	584	0.003624	10.6034	584	0.004651	10.6031
585	0.00382722	10.6151	585	0.003509	10.6096	585	0.004874	10.6096
586	0.0037768	10.6213	586	0.003161	10.6158	586	0.005077	10.6158
587	0.00380321	10.6275	587	0.002728	10.6223	587	0.005049	10.622
588	0.00380801	10.6337	588	0.002437	10.6285	588	0.004882	10.6282
589	0.00364475	10.6399	589	0.002441	10.6347	589	0.004786	10.6345
590	0.0035487	10.6462	590	0.002477	10.641	590	0.004818	10.6407
591	0.00356311	10.6526	591	0.002384	10.6472	591	0.005005	10.6469
592	0.00357992	10.6588	592	0.002237	10.6534	592	0.005112	10.6531
593	0.0035343	10.6651	593	0.002068	10.6596	593	0.005156	10.6596
594	0.00351029	10.6713	594	0.001896	10.6659	594	0.005096	10.6658
595	0.00355591	10.6775	595	0.001957	10.6723	595	0.005057	10.6721
596	0.00364234	10.6837	596	0.002144	10.6785	596	0.005188	10.6783
597	0.00366395	10.6899	597	0.002226	10.6847	597	0.005518	10.6845
598	0.00372398	10.6962	598	0.002208	10.691	598	0.005813	10.6907
599	0.00379121	10.7024	599	0.002197	10.6972	599	0.006007	10.6969
600	0.00374559	10.7088	600	0.002265	10.7034	600	0.006163	10.7032
601	0.0037672	10.7151	601	0.002445	10.7096	601	0.006131	10.7094
602	0.00385603	10.7213	602	0.002595	10.7159	602	0.00598	10.7158
603	0.0039977	10.7275	603	0.00267	10.7221	603	0.005888	10.722
604	0.00406732	10.7337	604	0.002703	10.7285	604	0.00596	10.7283
605	0.00402171	10.74	605	0.002624	10.7348	605	0.00592	10.7345
606	0.0040097	10.7462	606	0.002609	10.741	606	0.005832	10.7407
607	0.00417777	10.7524	607	0.00285	10.7472	607	0.005773	10.7469
608	0.00439867	10.7588	608	0.003068	10.7534	608	0.005864	10.7532
609	0.00454273	10.7651	609	0.003093	10.7597	609	0.006011	10.7594
610	0.00461716	10.7713	610	0.002989	10.7659	610	0.006167	10.7658
611	0.00459555	10.7775	611	0.002767	10.7721	611	0.006346	10.7721
612	0.00454273	10.7837	612	0.002581	10.7785	612	0.006755	10.7783
613	0.00442508	10.79	613	0.00243	10.7848	613	0.007229	10.7845
614	0.00427141	10.7962	614	0.002276	10.791	614	0.007476	10.7907
615	0.00420658	10.8024	615	0.002308	10.7972	615	0.007595	10.797
616	0.00418017	10.8086	616	0.002455	10.8034	616	0.007746	10.8032
617	0.00404091	10.8151	617	0.00238	10.8097	617	0.007977	10.8094
618	0.00392807	10.8213	618	0.002398	10.8159	618	0.008088	10.8156
619	0.00388245	10.8275	619	0.002588	10.8221	619	0.008331	10.8221
620	0.00388245	10.8338	620	0.002617	10.8283	620	0.008597	10.8283
621	0.00390646	10.84	621	0.002663	10.8348	621	0.008665	10.8345
622	0.00391126	10.8462	622	0.002656	10.841	622	0.008605	10.8407
623	0.00390886	10.8524	623	0.002688	10.8472	623	0.008395	10.847
624	0.00387764	10.8586	624	0.002771	10.8535	624	0.00822	10.8532
625	0.00375279	10.8649	625	0.002782	10.8597	625	0.008307	10.8594
626	0.00366395	10.8713	626	0.002642	10.8659	626	0.008462	10.8656
627	0.0037624	10.8775	627	0.002455	10.8721	627	0.008426	10.8719
628	0.00374079	10.8838	628	0.002201	10.8783	628	0.008243	10.8783
629	0.0035439	10.89	629	0.002036	10.8847	629	0.007877	10.8845
630	0.00335422	10.8962	630	0.002061	10.891	630	0.007468	10.8908
631	0.00319576	10.9024	631	0.002194	10.8972	631	0.007328	10.897
632	0.00308291	10.9087	632	0.00238	10.9035	632	0.007384	10.9032
633	0.00304689	10.9149	633	0.002502	10.9097	633	0.007495	10.9094
634	0.00308051	10.9213	634	0.00262	10.9159	634	0.007511	10.9156
635	0.00321256	10.9275	635	0.002782	10.9221	635	0.007388	10.9219
636	0.00327979	10.9338	636	0.002972	10.9284	636	0.007316	10.9283
637	0.00316214	10.94	637	0.003115	10.9346	637	0.00736	10.9345
638	0.00308531	10.9462	638	0.003187	10.941	638	0.007384	10.9408
639	0.00321016	10.9524	639	0.003161	10.9473	639	0.007372	10.947
640	0.00334942	10.9587	640	0.003108	10.9535	640	0.007559	10.9532
641	0.00346947	10.9649	641	0.002903	10.9597	641	0.007814	10.9594
642	0.00359432	10.9711	642	0.002606	10.9659	642	0.007853	10.9657
643	0.00364475	10.9776	643	0.002423	10.9721	643	0.00785	10.9719
644	0.00364475	10.9838	644	0.002549	10.9784	644	0.007989	10.9781
645	0.00363274	10.99	645	0.002635	10.9846	645	0.008212	10.9846
646	0.00363994	10.9962	646	0.002825	10.9909	646	0.008291	10.9908
647	0.00365435	11.0025	647	0.00309	10.9972	647	0.008418	10.997
648	0.00374799	11.0087	648	0.003169	11.0035	648	0.008701	11.0032
649	0.00382002	11.0149	649	0.003219	11.0097	649	0.008952	11.0094
650	0.00389685	11.0211	650	0.003237	11.0159	650	0.009043	11.0157
651	0.00397128	11.0276	651	0.003273	11.0221	651	0.009059	11.0219
652	0.0040049	11.0338	652	0.003502	11.0284	652	0.009123	11.0281
653	0.00404572	11.04	653	0.003774	11.0346	653	0.009234	11.0345
654	0.00420898	11.0462	654	0.003656	11.0408	654	0.009314	11.0408
655	0.00442748	11.0525	655	0.003366	11.0473	655	0.009246	11.047
656	0.00454513	11.0587	656	0.002946	11.0535	656	0.009095	11.0532
657	0.00451872	11.0649	657	0.002445	11.0597	657	0.008916	11.0595
658	0.00441787	11.0711	658	0.002169	11.0659	658	0.008753	11.0657
659	0.00434824	11.0773	659	0.001889	11.0722	659	0.008717	11.0719
660	0.0042522	11.0838	660	0.00166	11.0784	660	0.008824	11.0781
661	0.00417297	11.09	661	0.001846	11.0846	661	0.008884	11.0843
662	0.00413215	11.0962	662	0.002029	11.0908	662	0.008916	11.0908
663	0.00406732	11.1025	663	0.00185	11.0971	663	0.008956	11.097
664	0.00393287	11.1087	664	0.001642	11.1035	664	0.009059	11.1032
665	0.00367836	11.1149	665	0.001703	11.1097	665	0.009234	11.1095
666	0.00348628	11.1211	666	0.001889	11.1159	666	0.0096	11.1157
667	0.0035415	11.1274	667	0.002133	11.1222	667	0.009982	11.1219
668	0.00367836	11.1338	668	0.002276	11.1284	668	0.010336	11.1281
669	0.00371918	11.14	669	0.002466	11.1346	669	0.010642	11.1343
670	0.00362794	11.1463	670	0.002527	11.1408	670	0.010742	11.1408
671	0.00351509	11.1525	671	0.002201	11.1471	671	0.010722	11.147
672	0.00337583	11.1587	672	0.001828	11.1535	672	0.010778	11.1532
673	0.0032942	11.1649	673	0.001735	11.1597	673	0.011116	11.1595
674	0.00342625	11.1712	674	0.001946	11.166	674	0.011378	11.1657
675	0.00361113	11.1774	675	0.002115	11.1722	675	0.011494	11.1719
676	0.00384643	11.1836	676	0.002036	11.1784	676	0.01149	11.1781
677	0.00396648	11.19	677	0.001878	11.1846	677	0.011398	11.1844
678	0.00395448	11.1963	678	0.001896	11.1908	678	0.011307	11.1906
679	0.0040073	11.2025	679	0.002032	11.1971	679	0.011386	11.197
680	0.00420178	11.2087	680	0.002369	11.2033	680	0.011573	11.2033
681	0.00440827	11.2149	681	0.002918	11.2097	681	0.011792	11.2095
682	0.00462436	11.2212	682	0.003337	11.216	682	0.0119	11.2157
683	0.00480924	11.2274	683	0.003445	11.2222	683	0.011697	11.2219
684	0.00481404	11.2336	684	0.003351	11.2284	684	0.011486	11.2281
685	0.00487647	11.24	685	0.002839	11.2346	685	0.011446	11.2344
686	0.00487647	11.2463	686	0.002455	11.2409	686	0.011494	11.2406
687	0.00478763	11.2525	687	0.002549	11.2471	687	0.011561	11.247
688	0.00474201	11.2587	688	0.002602	11.2533	688	0.01143	11.2533
689	0.00473481	11.2649	689	0.002506	11.2598	689	0.01114	11.2595
690	0.0047132	11.2712	690	0.002316	11.266	690	0.011072	11.2657
691	0.004706	11.2774	691	0.001896	11.2722	691	0.011096	11.2719
692	0.0047156	11.2836	692	0.001527	11.2784	692	0.011068	11.2782
693	0.00467718	11.2898	693	0.001538	11.2846	693	0.011048	11.2844
694	0.00459555	11.2963	694	0.001642	11.2909	694	0.011056	11.2906
695	0.0044923	11.3025	695	0.001968	11.2971	695	0.011028	11.2968
696	0.00443468	11.3087	696	0.00209	11.3033	696	0.010897	11.3033
697	0.00445629	11.315	697	0.001878	11.3095	697	0.010778	11.3095
698	0.00446829	11.3212	698	0.001728	11.316	698	0.010889	11.3157
699	0.00444909	11.3274	699	0.001649	11.3222	699	0.011064	11.3219
700	0.00443468	11.3336	700	0.001749	11.3284	700	0.01102	11.3282
701	0.00439867	11.3398	701	0.001875	11.3346	701	0.011156	11.3344
702	0.00440107	11.3462	702	0.00214	11.3409	702	0.011414	11.3406
703	0.00446829	11.3525	703	0.002348	11.3471	703	0.01186	11.3468
704	0.00444669	11.3588	704	0.002247	11.3533	704	0.012305	11.3532
705	0.00439146	11.365	705	0.00223	11.3595	705	0.012317	11.3595
706	0.00432663	11.3712	706	0.002477	11.366	706	0.012313	11.3657
707	0.00426901	11.3774	707	0.002724	11.3722	707	0.012377	11.372
708	0.00422819	11.3836	708	0.002896	11.3784	708	0.012425	11.3782
709	0.00418978	11.3899	709	0.003061	11.3847	709	0.012632	11.3844
710	0.004245	11.3961	710	0.003079	11.3909	710	0.012918	11.3906
711	0.00435064	11.4025	711	0.003122	11.3971	711	0.012862	11.3968
712	0.00443468	11.4087	712	0.003011	11.4033	712	0.012548	11.4031
713	0.00452832	11.415	713	0.002756	11.4096	713	0.012142	11.4095
714	0.00468679	11.4212	714	0.002717	11.4158	714	0.011892	11.4157
715	0.00477082	11.4274	715	0.002817	11.4222	715	0.012035	11.422
716	0.00484525	11.4336	716	0.002853	11.4284	716	0.012019	11.4282
717	0.00488367	11.4399	717	0.002814	11.4347	717	0.011991	11.4344
718	0.00491488	11.4461	718	0.002735	11.4409	718	0.012142	11.4406
719	0.00509256	11.4524	719	0.002617	11.4471	719	0.012067	11.4469
720	0.0051958	11.4588	720	0.00248	11.4533	720	0.01178	11.4531
721	0.00520781	11.465	721	0.002387	11.4596	721	0.011657	11.4594
722	0.0051982	11.4712	722	0.002409	11.4658	722	0.011844	11.4657
723	0.00511177	11.4774	723	0.002523	11.4722	723	0.011975	11.472
724	0.00501813	11.4837	724	0.002387	11.4785	724	0.011979	11.4782
725	0.00488607	11.4899	725	0.002183	11.4847	725	0.012063	11.4844
726	0.00463637	11.4961	726	0.002333	11.4909	726	0.012234	11.4906
727	0.0044923	11.5023	727	0.002527	11.4971	727	0.012118	11.4969
728	0.0044803	11.5088	728	0.002835	11.5033	728	0.011884	11.5031
729	0.00432663	11.515	729	0.003176	11.5096	729	0.012023	11.5093
730	0.00422099	11.5212	730	0.003495	11.5158	730	0.01225	11.5158
731	0.00414416	11.5274	731	0.003735	11.522	731	0.012254	11.522
732	0.00402171	11.5337	732	0.003835	11.5285	732	0.012182	11.5282
733	0.00395448	11.5399	733	0.00395	11.5347	733	0.012146	11.5344
734	0.00396888	11.5461	734	0.00423	11.5409	734	0.012095	11.5407
735	0.00410574	11.5523	735	0.004427	11.5471	735	0.011959	11.5469
736	0.00428102	11.5586	736	0.004201	11.5534	736	0.0119	11.5531
737	0.00434824	11.565	737	0.003896	11.5596	737	0.012266	11.5593
738	0.00432423	11.5712	738	0.003552	11.5658	738	0.012747	11.5656
739	0.00431703	11.5775	739	0.003316	11.572	739	0.012795	11.572
740	0.00427381	11.5837	740	0.003122	11.5784	740	0.012747	11.5782
741	0.00426661	11.5899	741	0.002979	11.5847	741	0.012966	11.5844
742	0.00430262	11.5961	742	0.002885	11.5909	742	0.013328	11.5907
743	0.00430743	11.6023	743	0.002946	11.5971	743	0.013626	11.5969
744	0.00427621	11.6086	744	0.00309	11.6034	744	0.013766	11.6031
745	0.00423299	11.615	745	0.00324	11.6096	745	0.013952	11.6093
746	0.00427141	11.6212	746	0.003434	11.6158	746	0.014295	11.6156
747	0.00443228	11.6275	747	0.003681	11.622	747	0.014509	11.622
748	0.00454993	11.6337	748	0.00385	11.6283	748	0.014565	11.6282
749	0.00465077	11.6399	749	0.003946	11.6347	749	0.0147	11.6344
750	0.0047252	11.6461	750	0.004072	11.6409	750	0.014836	11.6407
751	0.00469399	11.6523	751	0.004136	11.6471	751	0.014804	11.6469
752	0.00464597	11.6586	752	0.004162	11.6534	752	0.014637	11.6531
753	0.00460755	11.6648	753	0.004015	11.6596	753	0.014466	11.6593
754	0.00454993	11.6712	754	0.003703	11.6658	754	0.014426	11.6656
755	0.00452832	11.6775	755	0.00347	11.672	755	0.014275	11.6718
756	0.00454033	11.6837	756	0.003455	11.6783	756	0.014004	11.6782
757	0.00444188	11.6899	757	0.003477	11.6845	757	0.013893	11.6845
758	0.00427621	11.6961	758	0.003613	11.6909	758	0.013773	11.6907
759	0.00410574	11.7024	759	0.003703	11.6972	759	0.01365	11.6969
760	0.00394967	11.7086	760	0.00371	11.7034	760	0.01363	11.7031
761	0.00386084	11.7148	761	0.003735	11.7096	761	0.013837	11.7094
762	0.00399529	11.7213	762	0.003968	11.7158	762	0.014167	11.7156
763	0.00416096	11.7275	763	0.004384	11.7221	763	0.014486	11.7218
764	0.00430262	11.7337	764	0.004947	11.7283	764	0.014784	11.7282
765	0.00441307	11.7399	765	0.005477	11.7345	765	0.015182	11.7345
766	0.00434584	11.7461	766	0.005757	11.7409	766	0.015476	11.7407
767	0.0042546	11.7524	767	0.005975	11.7472	767	0.015556	11.7469
768	0.00434824	11.7586	768	0.006086	11.7534	768	0.015496	11.7531
769	0.00456434	11.7648	769	0.006169	11.7596	769	0.015417	11.7594
770	0.0047276	11.771	770	0.006298	11.7659	770	0.015683	11.7656
771	0.00482365	11.7775	771	0.006545	11.7721	771	0.015926	11.7718
772	0.0047156	11.7837	772	0.006613	11.7783	772	0.015874	11.778
773	0.00455953	11.7899	773	0.006276	11.7845	773	0.015755	11.7845
774	0.0044755	11.7962	774	0.00595	11.7907	774	0.015866	11.7907
775	0.00457874	11.8024	775	0.005653	11.7972	775	0.016149	11.7969
776	0.00482124	11.8086	776	0.005391	11.8034	776	0.016531	11.8032
777	0.00509736	11.8148	777	0.00533	11.8096	777	0.016901	11.8094
778	0.00525823	11.8211	778	0.00533	11.8159	778	0.017386	11.8156
779	0.0051982	11.8275	779	0.005276	11.8221	779	0.017847	11.8218
780	0.00515258	11.8337	780	0.005086	11.8283	780	0.017947	11.828
781	0.00508055	11.8399	781	0.004796	11.8345	781	0.017939	11.8345
782	0.00496531	11.8462	782	0.004473	11.8407	782	0.018098	11.8407
783	0.00496771	11.8524	783	0.00442	11.8472	783	0.018321	11.8469
784	0.00503493	11.8586	784	0.004631	11.8534	784	0.018345	11.8532
785	0.00491488	11.8648	785	0.004839	11.8596	785	0.018015	11.8594
786	0.00479723	11.8711	786	0.004907	11.8659	786	0.017648	11.8656
787	0.00469399	11.8773	787	0.004807	11.8721	787	0.01741	11.8718
788	0.00454993	11.8837	788	0.004807	11.8783	788	0.017259	11.878
789	0.00450671	11.89	789	0.004932	11.8845	789	0.017318	11.8843
790	0.0044851	11.8962	790	0.005108	11.8908	790	0.017605	11.8907
791	0.00455233	11.9024	791	0.005244	11.897	791	0.017903	11.8969
792	0.00479964	11.9086	792	0.005398	11.9034	792	0.018162	11.9032
793	0.00503013	11.9149	793	0.005524	11.9097	793	0.018381	11.9094
794	0.00506135	11.9211	794	0.005384	11.9159	794	0.018436	11.9156
795	0.00498932	11.9273	795	0.005215	11.9221	795	0.018675	11.9218
796	0.00491248	11.9337	796	0.005194	11.9283	796	0.018854	11.9281
797	0.00482605	11.94	797	0.005226	11.9345	797	0.018922	11.9343
798	0.00480684	11.9462	798	0.005108	11.9408	798	0.019232	11.9407
799	0.00489087	11.9524	799	0.005122	11.947	799	0.019363	11.947
800	0.00497251	11.9586	800	0.005208	11.9534	800	0.019319	11.9532
801	0.00503013	11.9649	801	0.005327	11.9597	801	0.019304	11.9594
802	0.0049629	11.9711	802	0.005463	11.9659	802	0.019693	11.9656
803	0.00476122	11.9773	803	0.005585	11.9721	803	0.020274	11.9718
804	0.00465077	11.9835	804	0.005699	11.9783	804	0.020923	11.9781
805	0.00461716	11.99	805	0.005828	11.9846	805	0.021524	11.9843
806	0.00456674	11.9962	806	0.005943	11.9908	806	0.022311	11.9905
807	0.00450431	12.0024	807	0.006043	11.997	807	0.023175	11.997
808	0.00437706	12.0087	808	0.006162	12.0032	808	0.023815	12.0032
809	0.00421619	12.0149	809	0.00609	12.0097	809	0.024643	12.0094
810	0.00419938	12.0211	810	0.006008	12.0159	810	0.025454	12.0156
811	0.00422579	12.0273	811	0.005954	12.0221	811	0.026326	12.0219
812	0.00430743	12.0335	812	0.006	12.0283	812	0.026879	12.0281
813	0.00446589	12.0398	813	0.006094	12.0346	813	0.027555	12.0343
814	0.00441787	12.0462	814	0.00618	12.0408	814	0.028335	12.0405
815	0.00439626	12.0524	815	0.006284	12.047	815	0.029476	12.0468
816	0.00437706	12.0587	816	0.006431	12.0532	816	0.030571	12.0532
817	0.00438426	12.0649	817	0.006574	12.0596	817	0.031967	12.0594
818	0.00455713	12.0711	818	0.006696	12.0659	818	0.033399	12.0656
819	0.0047084	12.0773	819	0.006821	12.0721	819	0.034955	12.0719
820	0.00465317	12.0835	820	0.006979	12.0784	820	0.036681	12.0781
821	0.00455473	12.0898	821	0.007137	12.0846	821	0.038675	12.0843
822	0.00444909	12.0962	822	0.007065	12.0908	822	0.040994	12.0905
823	0.00438906	12.1024	823	0.006807	12.097	823	0.043258	12.0968
824	0.00454753	12.1087	824	0.006585	12.1032	824	0.045971	12.1032
825	0.00469639	12.1149	825	0.006427	12.1095	825	0.048498	12.1094
826	0.00488367	12.1211	826	0.006255	12.1159	826	0.051485	12.1157
827	0.00515258	12.1273	827	0.006255	12.1221	827	0.054159	12.1219
828	0.00527264	12.1336	828	0.006262	12.1284	828	0.057592	12.1281
829	0.00520061	12.1398	829	0.00614	12.1346	829	0.060707	12.1343
830	0.0051886	12.146	830	0.005986	12.1408	830	0.064439	12.1405
831	0.005191	12.1525	831	0.006036	12.147	831	0.067861	12.1468
832	0.00514058	12.1587	832	0.006269	12.1532	832	0.071772	12.153
833	0.00497491	12.1649	833	0.006567	12.1595	833	0.075659	12.1594
834	0.00479723	12.1711	834	0.006785	12.1658	834	0.080015	12.1657
835	0.00467958	12.1773	835	0.007065	12.1722	835	0.084686	12.1719
836	0.00456434	12.1836	836	0.007402	12.1784	836	0.089623	12.1781
837	0.00446349	12.1898	837	0.007664	12.1846	837	0.095237	12.1843
838	0.00446109	12.196	838	0.008051	12.1908	838	0.100504	12.1906
839	0.00460035	12.2025	839	0.008441	12.197	839	0.10652	12.1968
840	0.00473001	12.2087	840	0.008606	12.2033	840	0.112149	12.203
841	0.00482845	12.2149	841	0.00856	12.2095	841	0.119072	12.2095
842	0.00477082	12.2211	842	0.008499	12.2157	842	0.125222	12.2157
843	0.00478763	12.2274	843	0.008556	12.2222	843	0.132388	12.2219
844	0.0049461	12.2336	844	0.008685	12.2284	844	0.138638	12.2281
845	0.00504934	12.2398	845	0.008692	12.2346	845	0.146316	12.2343
846	0.005179	12.246	846	0.008427	12.2408	846	0.153354	12.2406
847	0.00522462	12.2522	847	0.008047	12.247	847	0.161025	12.2468
848	0.00524622	12.2587	848	0.007603	12.2533	848	0.168544	12.253
849	0.00531825	12.2649	849	0.007287	12.2595	849	0.176437	12.2592
850	0.00537108	12.2711	850	0.007452	12.2657	850	0.184605	12.2657
851	0.00544551	12.2774	851	0.007703	12.272	851	0.192275	12.2719
852	0.00562318	12.2836	852	0.007932	12.2784	852	0.200714	12.2781
853	0.00561118	12.2898	853	0.008176	12.2846	853	0.208746	12.2843
854	0.00548393	12.296	854	0.008373	12.2908	854	0.217789	12.2906
855	0.00557276	12.3022	855	0.008549	12.2971	855	0.225396	12.2968
856	0.00561358	12.3087	856	0.008915	12.3033	856	0.23438	12.303
857	0.00561358	12.3149	857	0.009234	12.3095	857	0.242094	12.3092
858	0.00554635	12.3212	858	0.009502	12.3157	858	0.250703	12.3157
859	0.00545271	12.3274	859	0.009857	12.3219	859	0.258191	12.3219
860	0.00538548	12.3336	860	0.009961	12.3284	860	0.266744	12.3281
861	0.00534467	12.3398	861	0.009972	12.3346	861	0.274614	12.3344
862	0.00535187	12.346	862	0.009968	12.3408	862	0.282778	12.3406
863	0.00556316	12.3523	863	0.010008	12.3471	863	0.290512	12.3468
864	0.00577925	12.3585	864	0.010087	12.3533	864	0.298501	12.353
865	0.00574324	12.3649	865	0.010119	12.3595	865	0.306776	12.3592
866	0.005652	12.3712	866	0.010126	12.3657	866	0.314188	12.3655
867	0.00563279	12.3774	867	0.010101	12.372	867	0.32218	12.3719
868	0.00572403	12.3836	868	0.010001	12.3782	868	0.329501	12.3781
869	0.00580086	12.3898	869	0.009818	12.3846	869	0.337931	12.3844
870	0.00570722	12.3961	870	0.009653	12.3909	870	0.344925	12.3906
871	0.00561598	12.4023	871	0.00951	12.3971	871	0.352874	12.3968
872	0.00558717	12.4085	872	0.009484	12.4033	872	0.359841	12.403
873	0.00555115	12.4149	873	0.009402	12.4095	873	0.367575	12.4093
874	0.0056712	12.4212	874	0.009302	12.4157	874	0.374044	12.4155
875	0.0059017	12.4274	875	0.009277	12.422	875	0.380759	12.4219
876	0.00611299	12.4336	876	0.009126	12.4282	876	0.386862	12.4282
877	0.00622584	12.4398	877	0.009029	12.4346	877	0.393299	12.4344
878	0.00621143	12.4461	878	0.009226	12.4409	878	0.399307	12.4406
879	0.00617782	12.4523	879	0.009474	12.4471	879	0.404905	12.4468
880	0.00631228	12.4585	880	0.009657	12.4533	880	0.410578	12.4531
881	0.00644433	12.4647	881	0.009786	12.4595	881	0.415643	12.4593
882	0.00650676	12.4712	882	0.009886	12.4658	882	0.421185	12.4655
883	0.00644913	12.4774	883	0.010094	12.472	883	0.425879	12.4717
884	0.00622824	12.4836	884	0.010269	12.4782	884	0.431131	12.4782
885	0.00594972	12.4898	885	0.010373	12.4844	885	0.435646	12.4844
886	0.00574564	12.4961	886	0.010664	12.4909	886	0.441152	12.4906
887	0.00567361	12.5023	887	0.011033	12.4971	887	0.445688	12.4969
888	0.00564479	12.5085	888	0.011176	12.5033	888	0.450406	12.5031
889	0.00558717	12.5147	889	0.011244	12.5095	889	0.45446	12.5093
890	0.00551034	12.5211	890	0.011363	12.5158	890	0.458554	12.5155
891	0.00546712	12.5274	891	0.011348	12.522	891	0.462151	12.5217
892	0.00546232	12.5336	892	0.011216	12.5282	892	0.465767	12.5281
893	0.00555115	12.5399	893	0.011094	12.5344	893	0.469181	12.5344
894	0.00562799	12.5461	894	0.011054	12.5409	894	0.472037	12.5406
895	0.0056592	12.5523	895	0.011047	12.5471	895	0.474675	12.5469
896	0.00564479	12.5585	896	0.010972	12.5533	896	0.476851	12.5531
897	0.00557997	12.5647	897	0.010915	12.5596	897	0.479254	12.5593
898	0.00558237	12.571	898	0.011069	12.5658	898	0.481271	12.5655
899	0.00562559	12.5774	899	0.011227	12.572	899	0.483257	12.5717
900	0.00564719	12.5836	900	0.01132	12.5782	900	0.484947	12.5779
901	0.00563759	12.5899	901	0.011563	12.5844	901	0.486833	12.5844
902	0.00573603	12.5961	902	0.011424	12.5907	902	0.488094	12.5906
903	0.00584648	12.6023	903	0.011169	12.5971	903	0.489296	12.5969
904	0.00592331	12.6085	904	0.011259	12.6033	904	0.490573	12.6031
905	0.00600495	12.6148	905	0.011467	12.6096	905	0.492049	12.6093
906	0.00608178	12.621	906	0.011757	12.6158	906	0.492984	12.6155
907	0.00609618	12.6273	907	0.011997	12.622	907	0.49378	12.6218
908	0.00610579	12.6337	908	0.011947	12.6282	908	0.494575	12.628
909	0.00619463	12.6399	909	0.011771	12.6344	909	0.495204	12.6343
910	0.00626906	12.6461	910	0.011689	12.6407	910	0.495673	12.6406
911	0.00623304	12.6523	911	0.011832	12.6471	911	0.495837	12.6469
912	0.00610339	12.6585	912	0.012381	12.6533	912	0.495952	12.6531
913	0.0061226	12.6648	913	0.012768	12.6596	913	0.496	12.6593
914	0.00619943	12.671	914	0.012768	12.6658	914	0.495948	12.6655
915	0.00633389	12.6772	915	0.012743	12.672	915	0.495546	12.6718
916	0.00650916	12.6837	916	0.012689	12.6782	916	0.494925	12.678
917	0.00649475	12.6899	917	0.012696	12.6845	917	0.49409	12.6842
918	0.00639871	12.6961	918	0.012829	12.6907	918	0.493064	12.6906
919	0.00618262	12.7023	919	0.012983	12.6969	919	0.492156	12.6969
920	0.00602656	12.7086	920	0.013001	12.7034	920	0.491019	12.7031
921	0.00606977	12.7148	921	0.01289	12.7096	921	0.489992	12.7093
922	0.00608898	12.721	922	0.012904	12.7158	922	0.488616	12.7156
923	0.00604576	12.7272	923	0.01309	12.722	923	0.487267	12.7218
924	0.00603136	12.7335	924	0.013313	12.7282	924	0.48564	12.728
925	0.00586329	12.7399	925	0.013499	12.7345	925	0.484072	12.7342
926	0.00563999	12.7461	926	0.013804	12.7407	926	0.48227	12.7405
927	0.0056712	12.7523	927	0.014015	12.7469	927	0.480241	12.7469
928	0.00575044	12.7586	928	0.013997	12.7533	928	0.478323	12.7531
929	0.00585368	12.7648	929	0.014055	12.7596	929	0.47635	12.7593
930	0.00591611	12.771	930	0.014184	12.7658	930	0.474464	12.7655
931	0.0059065	12.7772	931	0.01422	12.772	931	0.472165	12.7718
932	0.00594492	12.7835	932	0.014288	12.7783	932	0.470144	12.778
933	0.0058969	12.7899	933	0.014478	12.7845	933	0.467462	12.7842
934	0.00584888	12.7961	934	0.01461	12.7907	934	0.465087	12.7904
935	0.00591851	12.8024	935	0.014689	12.7969	935	0.462465	12.7969
936	0.00603136	12.8086	936	0.014678	12.8032	936	0.460273	12.8031
937	0.00610579	12.8148	937	0.014793	12.8096	937	0.457822	12.8094
938	0.00604816	12.821	938	0.015098	12.8158	938	0.455395	12.8156
939	0.00598574	12.8272	939	0.015374	12.8221	939	0.452173	12.8218
940	0.00607938	12.8335	940	0.015678	12.8283	940	0.448914	12.828
941	0.00622344	12.8397	941	0.016216	12.8345	941	0.44568	12.8342
942	0.00617062	12.8461	942	0.016607	12.8407	942	0.442398	12.8405
943	0.00601455	12.8524	943	0.016761	12.8469	943	0.439497	12.8467
944	0.00596413	12.8586	944	0.016908	12.8532	944	0.436366	12.8531
945	0.00611539	12.8648	945	0.017241	12.8595	945	0.433172	12.8593
946	0.00631468	12.871	946	0.017607	12.8658	946	0.429527	12.8656
947	0.00657879	12.8773	947	0.01784	12.8721	947	0.426289	12.8718
948	0.00689812	12.8835	948	0.018076	12.8783	948	0.42272	12.878
949	0.00700857	12.8897	949	0.018395	12.8845	949	0.419935	12.8842
950	0.00701097	12.8961	950	0.018743	12.8907	950	0.416784	12.8905
951	0.007083	12.9024	951	0.018904	12.897	951	0.414027	12.8967
952	0.00728709	12.9086	952	0.019173	12.9032	952	0.410777	12.9031
953	0.00747917	12.9148	953	0.019557	12.9094	953	0.407805	12.9094
954	0.00748397	12.921	954	0.020016	12.9158	954	0.4042	12.9156
955	0.00729909	12.9273	955	0.020331	12.9221	955	0.400878	12.9218
956	0.00709261	12.9335	956	0.020521	12.9283	956	0.397509	12.928
957	0.00685251	12.9397	957	0.020715	12.9345	957	0.394175	12.9343
958	0.00668443	12.9459	958	0.021059	12.9407	958	0.390682	12.9405
959	0.00674446	12.9524	959	0.02141	12.947	959	0.387045	12.9467
960	0.00679248	12.9586	960	0.021761	12.9532	960	0.383648	12.9529
961	0.00671325	12.9648	961	0.02208	12.9594	961	0.380003	12.9594
962	0.00671085	12.9711	962	0.022414	12.9656	962	0.376729	12.9656
963	0.00682609	12.9773	963	0.022822	12.9721	963	0.37295	12.9718
964	0.00687411	12.9835	964	0.023206	12.9783	964	0.369799	12.978
965	0.00691013	12.9897	965	0.02364	12.9845	965	0.366091	12.9843
966	0.00688612	12.9959	966	0.024141	12.9908	966	0.362868	12.9905
967	0.00680929	13.0024	967	0.024668	12.997	967	0.359403	12.9967
968	0.00672765	13.0086	968	0.025045	13.0032	968	0.356487	13.0029
969	0.00668443	13.0148	969	0.025521	13.0094	969	0.353165	13.0094
970	0.00670124	13.0211	970	0.025987	13.0156	970	0.350081	13.0156
971	0.00678288	13.0273	971	0.026575	13.0221	971	0.346692	13.0218
972	0.00675166	13.0335	972	0.027088	13.0283	972	0.343318	13.0281
973	0.0066148	13.0397	973	0.027493	13.0345	973	0.340076	13.0343
974	0.0065956	13.0459	974	0.027837	13.0407	974	0.336698	13.0405
975	0.00667003	13.0522	975	0.028238	13.047	975	0.333734	13.0467
976	0.00679968	13.0586	976	0.02878	13.0532	976	0.330296	13.0529
977	0.00693174	13.0649	977	0.029195	13.0594	977	0.327082	13.0592
978	0.00702538	13.0711	978	0.029271	13.0656	978	0.323322	13.0656
979	0.00710701	13.0773	979	0.029235	13.0719	979	0.320195	13.0718
980	0.00714543	13.0835	980	0.029823	13.0783	980	0.316439	13.0781
981	0.00710221	13.0897	981	0.030289	13.0846	981	0.313241	13.0843
982	0.0070854	13.096	982	0.030586	13.0908	982	0.30976	13.0905
983	0.00711422	13.1022	983	0.030891	13.097	983	0.306617	13.0967
984	0.0070662	13.1086	984	0.031439	13.1032	984	0.303482	13.1029
985	0.00695815	13.1149	985	0.031948	13.1094	985	0.300434	13.1092
986	0.00690293	13.1211	986	0.032386	13.1157	986	0.297442	13.1156
987	0.00685251	13.1273	987	0.03297	13.1219	987	0.294331	13.1219
988	0.00677567	13.1335	988	0.034077	13.1283	988	0.291351	13.1281
989	0.00668924	13.1398	989	0.035404	13.1346	989	0.287938	13.1343
990	0.00679968	13.146	990	0.036053	13.1408	990	0.285121	13.1405
991	0.00691733	13.1522	991	0.036601	13.147	991	0.282046	13.1467
992	0.00695335	13.1584	992	0.037311	13.1532	992	0.279336	13.153
993	0.00703738	13.1649	993	0.038271	13.1594	993	0.275978	13.1592
994	0.00701577	13.1711	994	0.039028	13.1657	994	0.272935	13.1654
995	0.00690053	13.1773	995	0.039888	13.1719	995	0.269533	13.1719
996	0.00686931	13.1835	996	0.040676	13.1781	996	0.266585	13.1781
997	0.00697736	13.1898	997	0.041519	13.1846	997	0.263478	13.1843
998	0.00705899	13.196	998	0.042186	13.1908	998	0.260781	13.1905
999	0.00702058	13.2022	999	0.042816	13.197	999	0.258012	13.1967
1000	0.00679968	13.2084	1000	0.04358	13.2032	1000	0.255278	13.203
1001	0.00665802	13.2148	1001	0.044627	13.2095	1001	0.252466	13.2092
1002	0.0066004	13.2211	1002	0.04577	13.2157	1002	0.249677	13.2154
1003	0.00654518	13.2273	1003	0.046763	13.2219	1003	0.24725	13.2218
1004	0.00666763	13.2335	1004	0.047924	13.2281	1004	0.244628	13.2281
1005	0.00681409	13.2398	1005	0.048953	13.2346	1005	0.242253	13.2343
1006	0.00681649	13.246	1006	0.050347	13.2408	1006	0.239293	13.2405
1007	0.00673245	13.2522	1007	0.051648	13.247	1007	0.236635	13.2468
1008	0.00672525	13.2584	1008	0.053581	13.2532	1008	0.233667	13.253
1009	0.0068381	13.2647	1009	0.055358	13.2595	1009	0.231181	13.2592
1010	0.00693894	13.2711	1010	0.057108	13.2657	1010	0.228464	13.2654
1011	0.00699417	13.2773	1011	0.058685	13.2719	1011	0.226076	13.2716
1012	0.00709021	13.2836	1012	0.06047	13.2781	1012	0.223335	13.2781
1013	0.00716464	13.2898	1013	0.062334	13.2843	1013	0.22092	13.2843
1014	0.00716944	13.296	1014	0.064413	13.2908	1014	0.218219	13.2905
1015	0.00723427	13.3022	1015	0.066735	13.297	1015	0.215724	13.2968
1016	0.00736152	13.3084	1016	0.0687	13.3033	1016	0.213536	13.303
1017	0.00745036	13.3147	1017	0.070693	13.3095	1017	0.211368	13.3092
1018	0.00736872	13.3209	1018	0.072223	13.3157	1018	0.209371	13.3154
1019	0.00725348	13.3273	1019	0.07437	13.3219	1019	0.207322	13.3217
1020	0.00735192	13.3336	1020	0.076535	13.3281	1020	0.205317	13.3279
1021	0.00748878	13.3398	1021	0.079629	13.3344	1021	0.202787	13.3343
1022	0.00750798	13.346	1022	0.082367	13.3407	1022	0.200658	13.3406
1023	0.00751279	13.3522	1023	0.085281	13.347	1023	0.198156	13.3468
1024	0.00757041	13.3585	1024	0.087819	13.3533	1024	0.19617	13.353
1025	0.00759442	13.3647	1025	0.090647	13.3595	1025	0.194113	13.3592
1026	0.00763284	13.3709	1026	0.09363	13.3657	1026	0.192343	13.3654
1027	0.0077793	13.3774	1027	0.097046	13.3719	1027	0.190187	13.3717
1028	0.00804581	13.3836	1028	0.100605	13.3781	1028	0.18817	13.3779
1029	0.00821148	13.3898	1029	0.103813	13.3844	1029	0.186057	13.3843
1030	0.00815146	13.396	1030	0.10724	13.3906	1030	0.184183	13.3906
1031	0.00797378	13.4023	1031	0.110154	13.3971	1031	0.18256	13.3968
1032	0.00786814	13.4085	1032	0.113652	13.4033	1032	0.180929	13.403
1033	0.00784172	13.4147	1033	0.117115	13.4095	1033	0.179206	13.4092
1034	0.00783692	13.4209	1034	0.121255	13.4157	1034	0.177225	13.4154
1035	0.00794257	13.4271	1035	0.124997	13.4219	1035	0.175355	13.4217
1036	0.00800259	13.4336	1036	0.129241	13.4282	1036	0.173461	13.4279
1037	0.0077937	13.4398	1037	0.133048	13.4344	1037	0.171882	13.4341
1038	0.00752239	13.446	1038	0.137392	13.4406	1038	0.170048	13.4406
1039	0.00741674	13.4523	1039	0.141436	13.4469	1039	0.168377	13.4468
1040	0.00735912	13.4585	1040	0.14578	13.4533	1040	0.166598	13.453
1041	0.00739514	13.4647	1041	0.149816	13.4595	1041	0.165091	13.4592
1042	0.00752959	13.4709	1042	0.154057	13.4657	1042	0.163304	13.4655
1043	0.00762323	13.4771	1043	0.158315	13.4719	1043	0.161971	13.4717
1044	0.00767605	13.4836	1044	0.162645	13.4782	1044	0.16081	13.4779
1045	0.00764004	13.4898	1045	0.16738	13.4844	1045	0.159652	13.4841
1046	0.00750558	13.496	1046	0.171764	13.4906	1046	0.158295	13.4906
1047	0.00752479	13.5023	1047	0.176517	13.4968	1047	0.15699	13.4968
1048	0.00772888	13.5085	1048	0.18084	13.5033	1048	0.155936	13.503
1049	0.00791376	13.5147	1049	0.185897	13.5095	1049	0.15489	13.5092
1050	0.00807943	13.5209	1050	0.190586	13.5157	1050	0.153796	13.5155
1051	0.00822589	13.5272	1051	0.195816	13.522	1051	0.152467	13.5217
1052	0.00820428	13.5334	1052	0.200257	13.5282	1052	0.151504	13.5279
1053	0.00812024	13.5398	1053	0.205404	13.5344	1053	0.150529	13.5341
1054	0.00808903	13.546	1054	0.209813	13.5406	1054	0.14965	13.5404
1055	0.00808663	13.5523	1055	0.214648	13.5468	1055	0.148568	13.5468
1056	0.00816106	13.5585	1056	0.219387	13.5531	1056	0.147709	13.5531
1057	0.00827631	13.5647	1057	0.224323	13.5595	1057	0.146925	13.5593
1058	0.00830752	13.5709	1058	0.229058	13.5657	1058	0.146161	13.5655
1059	0.00833633	13.5772	1059	0.233653	13.572	1059	0.145365	13.5717
1060	0.00833393	13.5834	1060	0.23841	13.5782	1060	0.144757	13.5779
1061	0.00818267	13.5898	1061	0.242933	13.5844	1061	0.144176	13.5842
1062	0.00806982	13.5961	1062	0.247812	13.5906	1062	0.143448	13.5904
1063	0.00810103	13.6023	1063	0.252106	13.5969	1063	0.142819	13.5968
1064	0.00815866	13.6085	1064	0.256941	13.6031	1064	0.142286	13.603
1065	0.00821148	13.6147	1065	0.261006	13.6095	1065	0.141813	13.6093
1066	0.00828831	13.621	1066	0.265472	13.6158	1066	0.14108	13.6155
1067	0.00830512	13.6272	1067	0.269491	13.622	1067	0.140412	13.6217
1068	0.0082595	13.6334	1068	0.273989	13.6282	1068	0.139871	13.6279
1069	0.00820428	13.6396	1069	0.277914	13.6344	1069	0.139382	13.6342
1070	0.00820188	13.6461	1070	0.282291	13.6407	1070	0.139063	13.6404
1071	0.00832433	13.6523	1071	0.286251	13.6469	1071	0.138972	13.6466
1072	0.00839156	13.6585	1072	0.290341	13.6531	1072	0.138884	13.6531
1073	0.00838195	13.6647	1073	0.294062	13.6593	1073	0.138717	13.6593
1074	0.00832193	13.671	1074	0.297815	13.6658	1074	0.138518	13.6655
1075	0.00823309	13.6772	1075	0.301632	13.672	1075	0.138487	13.6717
1076	0.00816346	13.6834	1076	0.305321	13.6782	1076	0.138697	13.6779
1077	0.00814425	13.6896	1077	0.309267	13.6844	1077	0.138864	13.6842
1078	0.00822109	13.6961	1078	0.312705	13.6907	1078	0.138721	13.6904
1079	0.00830992	13.7023	1079	0.316515	13.6969	1079	0.138471	13.6966
1080	0.0082571	13.7085	1080	0.319644	13.7031	1080	0.138327	13.703
1081	0.00812745	13.7148	1081	0.32325	13.7093	1081	0.138379	13.7093
1082	0.00811784	13.721	1082	0.326448	13.7158	1082	0.138487	13.7155
1083	0.00818267	13.7272	1083	0.330165	13.722	1083	0.138479	13.7217
1084	0.0082643	13.7334	1084	0.333305	13.7282	1084	0.138435	13.728
1085	0.00836515	13.7396	1085	0.336663	13.7345	1085	0.138407	13.7342
1086	0.00841317	13.7459	1086	0.339574	13.7407	1086	0.138431	13.7404
1087	0.00840116	13.7523	1087	0.342273	13.7469	1087	0.13863	13.7466
1088	0.00834594	13.7585	1088	0.344804	13.7531	1088	0.139012	13.7529
1089	0.00841797	13.7648	1089	0.347237	13.7593	1089	0.139314	13.7593
1090	0.00858124	13.771	1090	0.349625	13.7655	1090	0.13935	13.7655
1091	0.00892218	13.7772	1091	0.351876	13.772	1091	0.139294	13.7718
1092	0.00925352	13.7834	1092	0.354356	13.7782	1092	0.139362	13.778
1093	0.00939518	13.7896	1093	0.356263	13.7844	1093	0.139581	13.7842
1094	0.0094336	13.7959	1094	0.358245	13.7907	1094	0.139819	13.7904
1095	0.00947202	13.8022	1095	0.359826	13.7969	1095	0.139986	13.7966
1096	0.00954405	13.8085	1096	0.36174	13.8031	1096	0.140086	13.8029
1097	0.00963769	13.8148	1097	0.363493	13.8093	1097	0.139994	13.8092
1098	0.00968811	13.821	1098	0.36535	13.8156	1098	0.139807	13.8155
1099	0.00959687	13.8272	1099	0.366913	13.822	1099	0.139839	13.8217
1100	0.00947922	13.8334	1100	0.368694	13.8283	1100	0.140209	13.828
1101	0.00927033	13.8397	1101	0.370142	13.8345	1101	0.14048	13.8342
1102	0.00914068	13.8459	1102	0.371483	13.8407	1102	0.140754	13.8404
1103	0.00913107	13.8521	1103	0.372813	13.8469	1103	0.140993	13.8467
1104	0.00911426	13.8586	1104	0.374135	13.8531	1104	0.141104	13.8529
1105	0.00905424	13.8648	1105	0.375361	13.8594	1105	0.141224	13.8591
1106	0.00893659	13.871	1106	0.376261	13.8656	1106	0.141466	13.8656
1107	0.00881654	13.8772	1107	0.377157	13.8718	1107	0.141781	13.8718
1108	0.00881414	13.8834	1108	0.377802	13.8782	1108	0.142274	13.878
1109	0.00887656	13.8897	1109	0.37834	13.8845	1109	0.142831	13.8842
1110	0.00902783	13.8959	1110	0.378584	13.8907	1110	0.142946	13.8904
1111	0.00927033	13.9021	1111	0.378942	13.8969	1111	0.142946	13.8967
1112	0.00939758	13.9084	1112	0.379078	13.9031	1112	0.142958	13.9029
1113	0.00950323	13.9148	1113	0.379093	13.9094	1113	0.143141	13.9091
1114	0.00971692	13.921	1114	0.379046	13.9156	1114	0.14342	13.9154
1115	0.0100483	13.9272	1115	0.379107	13.9218	1115	0.143686	13.9218
1116	0.0104132	13.9335	1116	0.379121	13.9282	1116	0.143865	13.928
1117	0.0107926	13.9397	1117	0.378892	13.9345	1117	0.143826	13.9342
1118	0.0110999	13.9459	1118	0.378741	13.9407	1118	0.143674	13.9404
1119	0.0112104	13.9521	1119	0.378637	13.9469	1119	0.143499	13.9467
1120	0.0111647	13.9584	1120	0.37848	13.9532	1120	0.143436	13.9529
1121	0.0111119	13.9648	1121	0.378046	13.9594	1121	0.143356	13.9591
1122	0.0111575	13.971	1122	0.377526	13.9656	1122	0.14309	13.9654
1123	0.0111791	13.9772	1123	0.377075	13.9718	1123	0.142628	13.9718
1124	0.0111071	13.9835	1124	0.376598	13.978	1124	0.142147	13.978
1125	0.0109654	13.9897	1125	0.375856	13.9845	1125	0.141844	13.9842
1126	0.0109486	13.9959	1126	0.374806	13.9907	1126	0.141892	13.9905
1127	0.010927	14.0021	1127	0.373974	13.9969	1127	0.142095	13.9967
1128	0.0108718	14.0084	1128	0.373124	14.0032	1128	0.142167	14.0029
1129	0.0109486	14.0146	1129	0.3723	14.0094	1129	0.142155	14.0091
1130	0.0111431	14.021	1130	0.371239	14.0156	1130	0.14194	14.0154
1131	0.0112632	14.0273	1131	0.370336	14.0218	1131	0.141868	14.0216
1132	0.0112944	14.0335	1132	0.369185	14.0281	1132	0.141848	14.028
1133	0.0113712	14.0397	1133	0.368045	14.0344	1133	0.141832	14.0343
1134	0.0115489	14.0459	1134	0.366723	14.0407	1134	0.141824	14.0405
1135	0.0117146	14.0522	1135	0.365507	14.047	1135	0.141685	14.0467
1136	0.0117818	14.0584	1136	0.36416	14.0532	1136	0.14122	14.0529
1137	0.011897	14.0646	1137	0.362712	14.0594	1137	0.140822	14.0591
1138	0.0120555	14.071	1138	0.360944	14.0656	1138	0.140444	14.0654
1139	0.0122428	14.0773	1139	0.359045	14.0718	1139	0.139895	14.0716
1140	0.0123893	14.0835	1140	0.35727	14.0781	1140	0.139449	14.078
1141	0.0125741	14.0897	1141	0.355403	14.0843	1141	0.138721	14.0843
1142	0.0127566	14.0959	1142	0.353657	14.0907	1142	0.138081	14.0905
1143	0.013172	14.1022	1143	0.351628	14.0969	1143	0.13748	14.0967
1144	0.0135826	14.1084	1144	0.349736	14.1032	1144	0.136899	14.1029
1145	0.0138635	14.1146	1145	0.347746	14.1094	1145	0.136541	14.1091
1146	0.0141012	14.1208	1146	0.346058	14.1156	1146	0.136151	14.1154
1147	0.0142957	14.1273	1147	0.344101	14.1219	1147	0.135415	14.1216
1148	0.0144853	14.1335	1148	0.34242	14.1281	1148	0.134751	14.1278
1149	0.0147326	14.1397	1149	0.340373	14.1343	1149	0.134218	14.1343
1150	0.0150424	14.1459	1150	0.338456	14.1405	1150	0.133732	14.1405
1151	0.0152393	14.1522	1151	0.336334	14.147	1151	0.133541	14.1467
1152	0.0153473	14.1584	1152	0.334441	14.1532	1152	0.13337	14.1529
1153	0.0152417	14.1646	1153	0.332294	14.1594	1153	0.133116	14.1592
1154	0.0151696	14.1708	1154	0.330143	14.1656	1154	0.132777	14.1654
1155	0.0152153	14.1773	1155	0.327846	14.1719	1155	0.132185	14.1716
1156	0.0152777	14.1835	1156	0.325587	14.1781	1156	0.131421	14.1778
1157	0.0153377	14.1897	1157	0.323372	14.1843	1157	0.130947	14.1843
1158	0.0154626	14.196	1158	0.32101	14.1905	1158	0.130267	14.1905
1159	0.0155154	14.2022	1159	0.318995	14.197	1159	0.129642	14.1967
1160	0.015585	14.2084	1160	0.316741	14.2032	1160	0.128994	14.2029
1161	0.0157435	14.2146	1161	0.314701	14.2094	1161	0.12831	14.2092
1162	0.0159908	14.2208	1162	0.312479	14.2157	1162	0.127466	14.2154
1163	0.0162141	14.2271	1163	0.310701	14.2219	1163	0.126619	14.2216
1164	0.0163677	14.2335	1164	0.308439	14.2281	1164	0.126038	14.2278
1165	0.0164758	14.2398	1165	0.306436	14.2343	1165	0.125648	14.234
1166	0.0166006	14.246	1166	0.303837	14.2405	1166	0.125246	14.2405
1167	0.0168095	14.2522	1167	0.301575	14.2468	1167	0.12463	14.2467
1168	0.0169512	14.2584	1168	0.299156	14.2532	1168	0.124148	14.253
1169	0.0171361	14.2646	1169	0.29684	14.2594	1169	0.123305	14.2592
1170	0.0172393	14.2709	1170	0.294446	14.2657	1170	0.122517	14.2654
1171	0.0173233	14.2771	1171	0.291936	14.2719	1171	0.121697	14.2716
1172	0.0174122	14.2835	1172	0.289442	14.2781	1172	0.121021	14.2778
1173	0.017477	14.2898	1173	0.286818	14.2843	1173	0.120424	14.2841
1174	0.0175586	14.296	1174	0.284495	14.2906	1174	0.119648	14.2905
1175	0.0178132	14.3022	1175	0.281728	14.2968	1175	0.118534	14.2967
1176	0.0181925	14.3084	1176	0.279588	14.3032	1176	0.117548	14.303
1177	0.0184638	14.3146	1177	0.277179	14.3094	1177	0.116844	14.3092
1178	0.0186775	14.3209	1178	0.275147	14.3157	1178	0.116295	14.3154
1179	0.0188072	14.3271	1179	0.272552	14.3219	1179	0.115972	14.3216
1180	0.0186871	14.3333	1180	0.270272	14.3281	1180	0.115507	14.3279
1181	0.0185599	14.3398	1181	0.267831	14.3343	1181	0.114994	14.3341
1182	0.0187327	14.346	1182	0.265458	14.3406	1182	0.114337	14.3403
1183	0.0189416	14.3522	1183	0.262938	14.3468	1183	0.113601	14.3468
1184	0.0191385	14.3584	1184	0.260429	14.353	1184	0.112638	14.353
1185	0.0192009	14.3647	1185	0.258253	14.3595	1185	0.111863	14.3592
1186	0.0192466	14.3709	1186	0.255999	14.3657	1186	0.111115	14.3654
1187	0.0193666	14.3771	1187	0.253862	14.3719	1187	0.110319	14.3716
1188	0.0194963	14.3833	1188	0.25136	14.3781	1188	0.109241	14.3779
1189	0.0196211	14.3897	1189	0.249428	14.3843	1189	0.108294	14.3841
1190	0.0200029	14.396	1190	0.247177	14.3906	1190	0.107582	14.3903
1191	0.0204015	14.4022	1191	0.245281	14.3968	1191	0.106973	14.3967
1192	0.0205239	14.4084	1192	0.242697	14.403	1192	0.106337	14.403
1193	0.0206968	14.4147	1193	0.240478	14.4095	1193	0.105668	14.4092
1194	0.0208913	14.4209	1194	0.238112	14.4157	1194	0.105075	14.4154
1195	0.0210881	14.4271	1195	0.235793	14.4219	1195	0.104367	14.4217
1196	0.0211602	14.4333	1196	0.233252	14.4281	1196	0.103651	14.4279
1197	0.021237	14.4396	1197	0.230689	14.4344	1197	0.102915	14.4341
1198	0.0213595	14.446	1198	0.228344	14.4406	1198	0.102183	14.4403
1199	0.0215731	14.4522	1199	0.225911	14.4468	1199	0.10097	14.4466
1200	0.0217868	14.4585	1200	0.223613	14.453	1200	0.099724	14.453
1201	0.0221206	14.4647	1201	0.220914	14.4592	1201	0.098742	14.4592
1202	0.0224951	14.4709	1202	0.218957	14.4657	1202	0.09793	14.4654
1203	0.0227881	14.4771	1203	0.21662	14.4719	1203	0.097075	14.4717
1204	0.0230666	14.4833	1204	0.214655	14.4781	1204	0.096366	14.4779
1205	0.0232635	14.4896	1205	0.212272	14.4844	1205	0.095607	14.4841
1206	0.0233619	14.4958	1206	0.210243	14.4906	1206	0.094831	14.4903
1207	0.0234507	14.5022	1207	0.208132	14.4968	1207	0.094107	14.4965
1208	0.0236116	14.5085	1208	0.206128	14.503	1208	0.093633	14.5028
1209	0.0236836	14.5147	1209	0.204063	14.5093	1209	0.093466	14.5092
1210	0.0236236	14.5209	1210	0.202081	14.5157	1210	0.092925	14.5154
1211	0.0234387	14.5271	1211	0.200285	14.5219	1211	0.092113	14.5217
1212	0.0232923	14.5333	1212	0.198378	14.5282	1212	0.091362	14.5279
1213	0.023165	14.5396	1213	0.196583	14.5344	1213	0.090717	14.5341
1214	0.023093	14.5458	1214	0.194321	14.5406	1214	0.089969	14.5403
1215	0.0231098	14.5522	1215	0.192529	14.5468	1215	0.089388	14.5466
1216	0.023177	14.5585	1216	0.19051	14.553	1216	0.088724	14.5528
1217	0.0231962	14.5647	1217	0.188758	14.5593	1217	0.08804	14.5592
1218	0.0232202	14.5709	1218	0.186786	14.5655	1218	0.086914	14.5655
1219	0.0233163	14.5771	1219	0.185012	14.5719	1219	0.085955	14.5717
1220	0.023602	14.5834	1220	0.182972	14.5782	1220	0.085318	14.5779
1221	0.0239117	14.5896	1221	0.181058	14.5844	1221	0.084654	14.5841
1222	0.0241326	14.5958	1222	0.17909	14.5906	1222	0.083858	14.5904
1223	0.0243727	14.602	1223	0.177291	14.5968	1223	0.083066	14.5966
1224	0.0245312	14.6085	1224	0.175674	14.6031	1224	0.082318	14.6028
1225	0.0245768	14.6147	1225	0.17385	14.6093	1225	0.081527	14.609
1226	0.0246801	14.6209	1226	0.17204	14.6155	1226	0.08087	14.6155
1227	0.0249082	14.6271	1227	0.169814	14.6218	1227	0.08023	14.6217
1228	0.0250546	14.6334	1228	0.167785	14.6282	1228	0.079967	14.6279
1229	0.0251531	14.6396	1229	0.165459	14.6344	1229	0.079585	14.6341
1230	0.0251915	14.6458	1230	0.163494	14.6406	1230	0.079199	14.6404
1231	0.0251891	14.652	1231	0.161785	14.6468	1231	0.078706	14.6466
1232	0.0251675	14.6585	1232	0.160311	14.6531	1232	0.078268	14.6528
1233	0.0250954	14.6647	1233	0.15824	14.6593	1233	0.077616	14.659
1234	0.025045	14.6709	1234	0.156218	14.6655	1234	0.077031	14.6655
1235	0.0250618	14.6772	1235	0.154239	14.6717	1235	0.076434	14.6717
1236	0.0250186	14.6834	1236	0.152357	14.6782	1236	0.075826	14.6779
1237	0.0248673	14.6896	1237	0.150813	14.6844	1237	0.074903	14.6841
1238	0.0247689	14.6958	1238	0.149218	14.6906	1238	0.073996	14.6904
1239	0.0246561	14.7021	1239	0.147812	14.6968	1239	0.073057	14.6966
1240	0.0244232	14.7083	1240	0.146002	14.7031	1240	0.072082	14.7028
1241	0.0241903	14.7147	1241	0.143995	14.7093	1241	0.071278	14.709
1242	0.0240462	14.7209	1242	0.141801	14.7155	1242	0.070538	14.7153
1243	0.0239357	14.7272	1243	0.140307	14.7218	1243	0.069941	14.7217
1244	0.0239141	14.7334	1244	0.138747	14.728	1244	0.069217	14.7279
1245	0.0239574	14.7396	1245	0.137392	14.7344	1245	0.068521	14.7342
1246	0.0240198	14.7458	1246	0.135521	14.7406	1246	0.067769	14.7404
1247	0.0240462	14.7521	1247	0.133596	14.7469	1247	0.067232	14.7466
1248	0.0240654	14.7583	1248	0.131733	14.7531	1248	0.066333	14.7528
1249	0.0241638	14.7647	1249	0.129998	14.7593	1249	0.065593	14.7591
1250	0.0243511	14.771	1250	0.128514	14.7655	1250	0.065128	14.7653
1251	0.0244568	14.7772	1251	0.126883	14.7718	1251	0.064634	14.7717
1252	0.0244856	14.7834	1252	0.125306	14.778	1252	0.063982	14.7779
1253	0.0245504	14.7896	1253	0.123499	14.7844	1253	0.063397	14.7842
1254	0.02456	14.7959	1254	0.12199	14.7906	1254	0.062717	14.7904
1255	0.0246801	14.8021	1255	0.120467	14.7969	1255	0.061965	14.7966
1256	0.0248337	14.8083	1256	0.119499	14.8031	1256	0.061153	14.8028
1257	0.0250978	14.8145	1257	0.118251	14.8093	1257	0.060333	14.809
1258	0.0253331	14.821	1258	0.117022	14.8155	1258	0.05992	14.8153
1259	0.0256693	14.8272	1259	0.115613	14.8218	1259	0.059494	14.8215
1260	0.0261039	14.8334	1260	0.114359	14.828	1260	0.058822	14.8279
1261	0.0267665	14.8396	1261	0.1131	14.8342	1261	0.058002	14.8342
1262	0.0275301	14.8459	1262	0.111957	14.8407	1262	0.057302	14.8404
1263	0.0285097	14.8521	1263	0.111323	14.8469	1263	0.056856	14.8466
1264	0.0297774	14.8583	1264	0.110749	14.8531	1264	0.056645	14.8529
1265	0.0310812	14.8645	1265	0.110469	14.8593	1265	0.056379	14.8591
1266	0.0327019	14.871	1266	0.110412	14.8656	1266	0.056208	14.8653
1267	0.034409	14.8772	1267	0.110896	14.8718	1267	0.056303	14.8715
1268	0.0367308	14.8834	1268	0.111487	14.878	1268	0.056486	14.878
1269	0.0389709	14.8896	1269	0.112473	14.8842	1269	0.056753	14.8842
1270	0.0420154	14.8959	1270	0.11371	14.8907	1270	0.057123	14.8904
1271	0.044911	14.9021	1271	0.115491	14.8969	1271	0.057787	14.8966
1272	0.0484862	14.9083	1272	0.11814	14.9031	1272	0.058961	14.9029
1273	0.0519796	14.9145	1273	0.120621	14.9093	1273	0.059999	14.9091
1274	0.0561694	14.9208	1274	0.124241	14.9156	1274	0.061798	14.9153
1275	0.0606233	14.9272	1275	0.127582	14.9218	1275	0.063743	14.9215
1276	0.0654854	14.9334	1276	0.131901	14.928	1276	0.066735	14.9277
1277	0.0708492	14.9397	1277	0.136177	14.9342	1277	0.069552	14.9342
1278	0.0762083	14.9459	1278	0.141794	14.9404	1278	0.073116	14.9404
1279	0.0827055	14.9521	1279	0.147719	14.9469	1279	0.076784	14.9466
1280	0.0887056	14.9583	1280	0.154329	14.9531	1280	0.081511	14.9529
1281	0.0963769	14.9645	1281	0.161365	14.9593	1281	0.086949	14.9591
1282	0.103306	14.9708	1282	0.168502	14.9656	1282	0.092535	14.9653
1283	0.112495	14.9772	1283	0.176764	14.9718	1283	0.098996	14.9715
1284	0.120687	14.9834	1284	0.184481	14.978	1284	0.105493	14.9778
1285	0.130942	14.9897	1285	0.194267	14.9842	1285	0.113689	14.9841
1286	0.140745	14.9959	1286	0.203243	14.9905	1286	0.121363	14.9904
1287	0.152203	15.0021	1287	0.214516	14.9969	1287	0.131349	14.9967
1288	0.163766	15.0083	1288	0.224409	15.0031	1288	0.140623	15.0029
1289	0.176285	15.0146	1289	0.236639	15.0094	1289	0.152519	15.0091
1290	0.189652	15.0208	1290	0.247937	15.0156	1290	0.163276	15.0153
1291	0.203318	15.027	1291	0.261501	15.0218	1291	0.176274	15.0215
1292	0.218605	15.0335	1292	0.274441	15.028	1292	0.188743	15.0278
1293	0.233132	15.0397	1293	0.288847	15.0343	1293	0.202914	15.034
1294	0.250376	15.0459	1294	0.303554	15.0405	1294	0.216803	15.0404
1295	0.266114	15.0521	1295	0.317841	15.0467	1295	0.231742	15.0467
1296	0.284701	15.0583	1296	0.334086	15.0531	1296	0.247142	15.0529
1297	0.301429	15.0646	1297	0.349116	15.0594	1297	0.262117	15.0591
1298	0.321667	15.0708	1298	0.367081	15.0656	1298	0.279372	15.0653
1299	0.339739	15.077	1299	0.382623	15.0718	1299	0.295039	15.0716
1300	0.361173	15.0833	1300	0.401958	15.078	1300	0.313304	15.0778
1301	0.381037	15.0897	1301	0.418242	15.0843	1301	0.329513	15.084
1302	0.402872	15.0959	1302	0.437799	15.0905	1302	0.348951	15.0903
1303	0.424063	15.1021	1303	0.454814	15.0967	1303	0.366043	15.0967
1304	0.445314	15.1084	1304	0.474038	15.1031	1304	0.386484	15.1029
1305	0.467762	15.1146	1305	0.492397	15.1094	1305	0.404173	15.1091
1306	0.488742	15.1208	1306	0.51151	15.1156	1306	0.425155	15.1153
1307	0.512456	15.127	1307	0.530762	15.1218	1307	0.444618	15.1216
1308	0.533098	15.1332	1308	0.549308	15.128	1308	0.46488	15.1278
1309	0.557459	15.1397	1309	0.569377	15.1343	1309	0.48482	15.134
1310	0.577687	15.1459	1310	0.586988	15.1405	1310	0.50447	15.1402
1311	0.601563	15.1521	1311	0.606781	15.1467	1311	0.524867	15.1467
1312	0.621796	15.1584	1312	0.623857	15.1529	1312	0.54369	15.1529
1313	0.644863	15.1646	1313	0.643647	15.1594	1313	0.565082	15.1591
1314	0.66549	15.1708	1314	0.660573	15.1656	1314	0.583729	15.1654
1315	0.687135	15.177	1315	0.679983	15.1718	1315	0.604958	15.1716
1316	0.70783	15.1833	1316	0.69636	15.1781	1316	0.622491	15.1778
1317	0.727448	15.1895	1317	0.714749	15.1843	1317	0.64263	15.184
1318	0.746892	15.1959	1318	0.730922	15.1905	1318	0.65965	15.1902
1319	0.764645	15.2022	1319	0.747525	15.1967	1319	0.679479	15.1965
1320	0.783531	15.2084	1320	0.76339	15.2029	1320	0.697008	15.2029
1321	0.799647	15.2146	1321	0.779061	15.2093	1321	0.71585	15.2091
1322	0.817254	15.2208	1322	0.794851	15.2156	1322	0.733176	15.2154
1323	0.831653	15.227	1323	0.808923	15.2218	1323	0.750037	15.2216
1324	0.847579	15.2333	1324	0.823781	15.2281	1324	0.7664	15.2278
1325	0.860431	15.2395	1325	0.83628	15.2343	1325	0.782	15.234
1326	0.874652	15.2459	1326	0.85056	15.2405	1326	0.798148	15.2402
1327	0.886744	15.2522	1327	0.861894	15.2467	1327	0.812562	15.2465
1328	0.899445	15.2584	1328	0.874608	15.253	1328	0.827856	15.2529
1329	0.91013	15.2646	1329	0.884942	15.2592	1329	0.840447	15.2591
1330	0.920726	15.2708	1330	0.896513	15.2656	1330	0.854428	15.2654
1331	0.930253	15.2771	1331	0.906101	15.2719	1331	0.865953	15.2716
1332	0.939149	15.2833	1332	0.91593	15.2781	1332	0.878414	15.2778
1333	0.947694	15.2895	1333	0.924931	15.2843	1333	0.888834	15.284
1334	0.954986	15.2957	1334	0.933548	15.2905	1334	0.900081	15.2903
1335	0.962486	15.3022	1335	0.941631	15.2967	1335	0.909705	15.2965
1336	0.968376	15.3084	1336	0.948599	15.303	1336	0.919432	15.3027
1337	0.974657	15.3146	1337	0.955692	15.3092	1337	0.927934	15.3092
1338	0.979464	15.3208	1338	0.961636	15.3155	1338	0.936579	15.3154
1339	0.984425	15.3271	1339	0.967994	15.3219	1339	0.944297	15.3216
1340	0.987954	15.3333	1340	0.972762	15.3281	1340	0.951204	15.3278
1341	0.991395	15.3395	1341	0.977984	15.3343	1341	0.957562	15.334
1342	0.993993	15.3457	1342	0.98202	15.3405	1342	0.963498	15.3403
1343	0.996322	15.3522	1343	0.985981	15.3468	1343	0.969374	15.3465
1344	0.998005	15.3584	1344	0.989282	15.353	1344	0.974084	15.3527
1345	0.999028	15.3646	1345	0.992394	15.3592	1345	0.97889	15.3592
1346	0.999589	15.3708	1346	0.994838	15.3654	1346	0.982606	15.3654
1347	0.999868	15.3771	1347	0.996613	15.3719	1347	0.986557	15.3716
1348	1	15.3833	1348	0.998064	15.3781	1348	0.989413	15.3778
1349	0.999393	15.3895	1349	0.998986	15.3843	1349	0.992417	15.3841
1350	0.998636	15.3957	1350	0.999627	15.3905	1350	0.994844	15.3903
1351	0.99733	15.402	1351	0.999846	15.3968	1351	0.996913	15.3965
1352	0.995841	15.4084	1352	1	15.403	1352	0.998186	15.4027
1353	0.993781	15.4146	1353	0.999806	15.4092	1353	0.999117	15.409
1354	0.9914	15.4209	1354	0.999469	15.4154	1354	0.999781	15.4154
1355	0.988943	15.4271	1355	0.998641	15.4217	1355	1	15.4216
1356	0.986151	15.4333	1356	0.997333	15.4281	1356	0.999972	15.4278
1357	0.982833	15.4395	1357	0.996107	15.4343	1357	0.999614	15.4341
1358	0.978974	15.4458	1358	0.994498	15.4405	1358	0.999093	15.4403
1359	0.975488	15.452	1359	0.992928	15.4468	1359	0.998249	15.4465
1360	0.971459	15.4584	1360	0.990881	15.453	1360	0.997143	15.4527
1361	0.967665	15.4646	1361	0.988802	15.4592	1361	0.996069	15.459
1362	0.963	15.4709	1362	0.985745	15.4654	1362	0.994203	15.4654
1363	0.958782	15.4771	1363	0.982755	15.4717	1363	0.992306	15.4716
1364	0.953898	15.4833	1364	0.979307	15.4781	1364	0.990233	15.4779
1365	0.949411	15.4895	1365	0.976013	15.4843	1365	0.988303	15.4841
1366	0.944085	15.4958	1366	0.972357	15.4906	1366	0.985467	15.4903
1367	0.939053	15.502	1367	0.968485	15.4968	1367	0.982698	15.4965
1368	0.933845	15.5082	1368	0.96455	15.503	1368	0.979284	15.5028
1369	0.928579	15.5147	1369	0.960334	15.5092	1369	0.975859	15.509
1370	0.922978	15.5209	1370	0.956284	15.5154	1370	0.971785	15.5152
1371	0.916932	15.5271	1371	0.951542	15.5217	1371	0.967643	15.5216
1372	0.911366	15.5333	1372	0.947463	15.5279	1372	0.963486	15.5279
1373	0.905119	15.5395	1373	0.942713	15.5343	1373	0.958966	15.5341
1374	0.899498	15.5458	1374	0.938451	15.5406	1374	0.954216	15.5403
1375	0.892955	15.552	1375	0.932924	15.5468	1375	0.949219	15.5465
1376	0.887383	15.5582	1376	0.928232	15.553	1376	0.944656	15.5527
1377	0.880705	15.5646	1377	0.922715	15.5592	1377	0.939416	15.559
1378	0.874681	15.5709	1378	0.917611	15.5655	1378	0.934717	15.5652
1379	0.867478	15.5771	1379	0.911722	15.5717	1379	0.929673	15.5716
1380	0.861233	15.5833	1380	0.905998	15.5779	1380	0.925284	15.5779
1381	0.854364	15.5896	1381	0.900284	15.5844	1381	0.920065	15.5841
1382	0.847944	15.5958	1382	0.894585	15.5906	1382	0.915668	15.5903
1383	0.841353	15.602	1383	0.888789	15.5968	1383	0.910305	15.5966
1384	0.834791	15.6082	1384	0.882347	15.603	1384	0.905233	15.6028
1385	0.828212	15.6144	1385	0.876945	15.6092	1385	0.899245	15.609
1386	0.821105	15.6209	1386	0.870938	15.6155	1386	0.893556	15.6152
1387	0.814694	15.6271	1387	0.865647	15.6217	1387	0.887899	15.6214
1388	0.807474	15.6333	1388	0.859278	15.6279	1388	0.882086	15.6279
1389	0.80133	15.6396	1389	0.853922	15.6341	1389	0.876274	15.6341
1390	0.794103	15.6458	1390	0.847772	15.6406	1390	0.870242	15.6403
1391	0.787964	15.652	1391	0.842302	15.6468	1391	0.864684	15.6465
1392	0.780828	15.6582	1392	0.835674	15.653	1392	0.858152	15.6528
1393	0.774636	15.6645	1393	0.829849	15.6593	1393	0.852618	15.659
1394	0.767303	15.6708	1394	0.823505	15.6655	1394	0.84622	15.6652
1395	0.760904	15.6771	1395	0.817293	15.6717	1395	0.840865	15.6714
1396	0.753968	15.6834	1396	0.810966	15.6779	1396	0.834782	15.6778
1397	0.747461	15.6896	1397	0.80479	15.6842	1397	0.829363	15.6841
1398	0.740779	15.6958	1398	0.798962	15.6906	1398	0.823097	15.6904
1399	0.734215	15.702	1399	0.792711	15.6968	1399	0.817253	15.6966
1400	0.727737	15.7082	1400	0.786739	15.703	1400	0.810788	15.7028
1401	0.720968	15.7145	1401	0.780068	15.7093	1401	0.804609	15.709
1402	0.71456	15.7207	1402	0.774451	15.7155	1402	0.798761	15.7152
1403	0.707611	15.7271	1403	0.768067	15.7217	1403	0.792694	15.7215
1404	0.701606	15.7334	1404	0.76259	15.7279	1404	0.787084	15.7277
1405	0.694881	15.7396	1405	0.756357	15.7342	1405	0.780667	15.7341
1406	0.688951	15.7458	1406	0.750751	15.7404	1406	0.774982	15.7403
1407	0.682021	15.752	1407	0.744245	15.7468	1407	0.768286	15.7466
1408	0.676014	15.7583	1408	0.738517	15.7531	1408	0.762768	15.7528
1409	0.669147	15.7645	1409	0.732359	15.7593	1409	0.756001	15.759
1410	0.663281	15.7707	1410	0.726857	15.7655	1410	0.750355	15.7652
1411	0.656714	15.7769	1411	0.720774	15.7717	1411	0.743946	15.7715
1412	0.650868	15.7834	1412	0.714767	15.778	1412	0.738078	15.7777
1413	0.64452	15.7896	1413	0.708666	15.7842	1413	0.731803	15.784
1414	0.638541	15.7958	1414	0.702472	15.7904	1414	0.725645	15.7904
1415	0.632212	15.802	1415	0.696407	15.7967	1415	0.719892	15.7966
1416	0.625984	15.8083	1416	0.689819	15.8031	1416	0.713924	15.8028
1417	0.620214	15.8145	1417	0.684019	15.8093	1417	0.708466	15.809
1418	0.614204	15.8207	1418	0.677718	15.8155	1418	0.702263	15.8153
1419	0.608747	15.8269	1419	0.671982	15.8217	1419	0.696964	15.8215
1420	0.602567	15.8334	1420	0.66548	15.828	1420	0.690606	15.8277
1421	0.5971	15.8396	1421	0.660003	15.8342	1421	0.685243	15.8339
1422	0.590917	15.8458	1422	0.654128	15.8404	1422	0.678997	15.8404
1423	0.58544	15.8521	1423	0.648981	15.8466	1423	0.673718	15.8466
1424	0.579296	15.8583	1424	0.643099	15.8531	1424	0.667464	15.8528
1425	0.57404	15.8645	1425	0.638073	15.8593	1425	0.661631	15.859
1426	0.568213	15.8707	1426	0.632686	15.8655	1426	0.655544	15.8653
1427	0.562988	15.8769	1427	0.62765	15.8718	1427	0.649696	15.8715
1428	0.556993	15.8832	1428	0.622004	15.878	1428	0.644042	15.8777
1429	0.551567	15.8896	1429	0.616563	15.8842	1429	0.638345	15.8839
1430	0.54585	15.8958	1430	0.611208	15.8904	1430	0.632994	15.8902
1431	0.540395	15.9021	1431	0.605795	15.8966	1431	0.626955	15.8966
1432	0.534968	15.9083	1432	0.600365	15.9029	1432	0.621727	15.9028
1433	0.529511	15.9145	1433	0.594572	15.9093	1433	0.615752	15.9091
1434	0.524409	15.9207	1434	0.589511	15.9155	1434	0.611033	15.9153
1435	0.51897	15.927	1435	0.583837	15.9217	1435	0.605344	15.9215
1436	0.51407	15.9332	1436	0.578908	15.928	1436	0.600395	15.9277
1437	0.50842	15.9396	1437	0.573252	15.9342	1437	0.594618	15.9339
1438	0.503741	15.9459	1438	0.56866	15.9404	1438	0.589446	15.9402
1439	0.498288	15.9521	1439	0.563327	15.9466	1439	0.583641	15.9466
1440	0.493786	15.9583	1440	0.558721	15.9529	1440	0.578342	15.9528
1441	0.488502	15.9645	1441	0.553351	15.9593	1441	0.57317	15.9591
1442	0.483925	15.9707	1442	0.548623	15.9655	1442	0.567895	15.9653
1443	0.478854	15.977	1443	0.543562	15.9718	1443	0.56289	15.9715
1444	0.474081	15.9832	1444	0.538787	15.978	1444	0.55759	15.9777
1445	0.469142	15.9894	1445	0.533948	15.9842	1445	0.552983	15.984
1446	0.46423	15.9959	1446	0.529034	15.9904	1446	0.547521	15.9902
1447	0.459826	16.0021	1447	0.524306	15.9967	1447	0.543065	15.9964
1448	0.455286	16.0083	1448	0.519155	16.0029	1448	0.537571	16.0028
1449	0.451204	16.0145	1449	0.514359	16.0091	1449	0.533131	16.0091
1450	0.446385	16.0207	1450	0.508846	16.0156	1450	0.528086	16.0153
1451	0.442457	16.027	1451	0.504212	16.0218	1451	0.523535	16.0215
1452	0.437732	16.0332	1452	0.499287	16.028	1452	0.518474	16.0277
1453	0.433866	16.0394	1453	0.495	16.0342	1453	0.513553	16.034
1454	0.429223	16.0459	1454	0.489903	16.0404	1454	0.508599	16.0402
1455	0.425119	16.0521	1455	0.485418	16.0467	1455	0.503535	16.0464
1456	0.42079	16.0583	1456	0.48021	16.0529	1456	0.499099	16.0528
1457	0.416529	16.0645	1457	0.47559	16.0591	1457	0.494018	16.0591
1458	0.412048	16.0708	1458	0.470833	16.0656	1458	0.489917	16.0653
1459	0.407525	16.077	1459	0.466629	16.0718	1459	0.485055	16.0715
1460	0.403513	16.0832	1460	0.462309	16.078	1460	0.480997	16.0777
1461	0.399186	16.0894	1461	0.457976	16.0842	1461	0.476155	16.084
1462	0.395462	16.0957	1462	0.453277	16.0905	1462	0.472085	16.0902
1463	0.391171	16.1021	1463	0.448438	16.0967	1463	0.467609	16.0964
1464	0.387781	16.1083	1464	0.444151	16.1029	1464	0.46344	16.1026
1465	0.383822	16.1145	1465	0.439605	16.1091	1465	0.459	16.1091
1466	0.380453	16.1208	1466	0.435842	16.1153	1466	0.454277	16.1153
1467	0.376424	16.127	1467	0.43168	16.1218	1467	0.450068	16.1215
1468	0.372924	16.1332	1468	0.427787	16.128	1468	0.445656	16.1278
1469	0.369017	16.1394	1469	0.423099	16.1342	1469	0.441694	16.134
1470	0.365337	16.1457	1470	0.419152	16.1405	1470	0.436995	16.1402
1471	0.361363	16.1521	1471	0.414615	16.1467	1471	0.433148	16.1464
1472	0.357368	16.1583	1472	0.410837	16.1529	1472	0.428485	16.1527
1473	0.353442	16.1646	1473	0.406639	16.1591	1473	0.424574	16.1591
1474	0.349283	16.1708	1474	0.402858	16.1654	1474	0.419947	16.1653
1475	0.345555	16.177	1475	0.39894	16.1718	1475	0.416084	16.1715
1476	0.34149	16.1832	1476	0.395241	16.178	1476	0.412153	16.1778
1477	0.338157	16.1895	1477	0.391179	16.1843	1477	0.408342	16.184
1478	0.334359	16.1957	1478	0.387208	16.1905	1478	0.404061	16.1902
1479	0.3313	16.2019	1479	0.383602	16.1967	1479	0.399737	16.1964
1480	0.327492	16.2083	1480	0.379788	16.2029	1480	0.39575	16.2026
1481	0.324378	16.2146	1481	0.376372	16.2091	1481	0.391493	16.2089
1482	0.320774	16.2208	1482	0.372375	16.2154	1482	0.387742	16.2153
1483	0.31753	16.227	1483	0.368956	16.2216	1483	0.383481	16.2216
1484	0.314315	16.2332	1484	0.364966	16.228	1484	0.379876	16.2278
1485	0.31128	16.2395	1485	0.361392	16.2342	1485	0.375731	16.234
1486	0.308185	16.2457	1486	0.357381	16.2405	1486	0.372134	16.2402
1487	0.304855	16.2519	1487	0.35412	16.2467	1487	0.368	16.2464
1488	0.301777	16.2582	1488	0.350191	16.2529	1488	0.364627	16.2527
1489	0.298312	16.2646	1489	0.346725	16.2592	1489	0.360811	16.2589
1490	0.295553	16.2708	1490	0.342976	16.2654	1490	0.357219	16.2652
1491	0.29229	16.277	1491	0.339556	16.2716	1491	0.353435	16.2716
1492	0.289666	16.2833	1492	0.336187	16.278	1492	0.349687	16.2778
1493	0.286574	16.2895	1493	0.332885	16.2843	1493	0.346043	16.284
1494	0.283784	16.2957	1494	0.329545	16.2905	1494	0.34224	16.2902
1495	0.280564	16.3019	1495	0.325935	16.2967	1495	0.338767	16.2965
1496	0.27775	16.3081	1496	0.322429	16.3029	1496	0.335015	16.3027
1497	0.274744	16.3146	1497	0.318644	16.3092	1497	0.331701	16.3089
1498	0.271855	16.3208	1498	0.315465	16.3154	1498	0.328013	16.3151
1499	0.269032	16.327	1499	0.311884	16.3216	1499	0.324866	16.3216
1500	0.266148	16.3333	1500	0.308694	16.3278	1500	0.320903	16.3278
1501	0.263457	16.3395	1501	0.305138	16.3343	1501	0.317474	16.334
1502	0.260554	16.3457	1502	0.302023	16.3405	1502	0.313746	16.3402
1503	0.257985	16.3519	1503	0.298543	16.3467	1503	0.310432	16.3465
1504	0.254976	16.3581	1504	0.295646	16.3529	1504	0.30709	16.3527
1505	0.252383	16.3644	1505	0.292643	16.3592	1505	0.303951	16.3589
1506	0.249413	16.3708	1506	0.290029	16.3654	1506	0.300605	16.3651
1507	0.24699	16.377	1507	0.28685	16.3716	1507	0.297327	16.3714
1508	0.244075	16.3833	1508	0.283886	16.3778	1508	0.293866	16.3778
1509	0.241497	16.3895	1509	0.280896	16.3842	1509	0.290333	16.384
1510	0.238608	16.3957	1510	0.277903	16.3905	1510	0.2875	16.3903
1511	0.235972	16.4019	1511	0.275089	16.3967	1511	0.284353	16.3965
1512	0.23311	16.4082	1512	0.272197	16.403	1512	0.281648	16.4027
1513	0.230406	16.4144	1513	0.269433	16.4092	1513	0.278644	16.4089
1514	0.227854	16.4208	1514	0.266286	16.4154	1514	0.275927	16.4151
1515	0.225278	16.427	1515	0.263386	16.4216	1515	0.272633	16.4214
1516	0.222793	16.4333	1516	0.260092	16.4278	1516	0.269828	16.4278
1517	0.220101	16.4395	1517	0.25749	16.4341	1517	0.266502	16.434
1518	0.217895	16.4457	1518	0.254196	16.4405	1518	0.263733	16.4403
1519	0.215539	16.4519	1519	0.25135	16.4467	1519	0.260721	16.4465
1520	0.213544	16.4582	1520	0.248453	16.453	1520	0.25792	16.4527
1521	0.210831	16.4644	1521	0.245804	16.4592	1521	0.254857	16.4589
1522	0.208624	16.4706	1522	0.242697	16.4654	1522	0.251742	16.4652
1523	0.206322	16.4771	1523	0.239775	16.4716	1523	0.24875	16.4714
1524	0.204279	16.4833	1524	0.236983	16.4779	1524	0.245742	16.4776
1525	0.202062	16.4895	1525	0.234227	16.4841	1525	0.243017	16.484
1526	0.200065	16.4957	1526	0.231488	16.4904	1526	0.240069	16.4903
1527	0.197832	16.502	1527	0.228624	16.4967	1527	0.237447	16.4965
1528	0.19546	16.5082	1528	0.22642	16.503	1528	0.234236	16.5027
1529	0.193061	16.5144	1529	0.224057	16.5092	1529	0.231607	16.5089
1530	0.190636	16.5206	1530	0.221803	16.5154	1530	0.229108	16.5152
1531	0.188826	16.5271	1531	0.219165	16.5217	1531	0.227143	16.5214
1532	0.186727	16.5333	1532	0.217111	16.5279	1532	0.224581	16.5276
1533	0.184821	16.5395	1533	0.21443	16.5341	1533	0.222186	16.5341
1534	0.182876	16.5457	1534	0.212032	16.5403	1534	0.219333	16.5403
1535	0.181207	16.552	1535	0.209462	16.5468	1535	0.216723	16.5465
1536	0.178919	16.5582	1536	0.207214	16.553	1536	0.213851	16.5527
1537	0.177104	16.5644	1537	0.20487	16.5592	1537	0.211113	16.559
1538	0.175053	16.5706	1538	0.202511	16.5654	1538	0.208714	16.5652
1539	0.173118	16.5769	1539	0.200199	16.5717	1539	0.206136	16.5714
1540	0.171128	16.5833	1540	0.197912	16.5779	1540	0.203459	16.5776
1541	0.169214	16.5895	1541	0.195747	16.5841	1541	0.200781	16.5838
1542	0.167392	16.5958	1542	0.19322	16.5903	1542	0.198784	16.5903
1543	0.165437	16.602	1543	0.191349	16.5966	1543	0.19619	16.5965
1544	0.163435	16.6082	1544	0.189152	16.603	1544	0.194145	16.6027
1545	0.161276	16.6144	1545	0.187259	16.6092	1545	0.191826	16.609
1546	0.15967	16.6206	1546	0.184829	16.6154	1546	0.190012	16.6152
1547	0.157706	16.6269	1547	0.182761	16.6217	1547	0.187609	16.6214
1548	0.156162	16.6333	1548	0.180589	16.6279	1548	0.185297	16.6276
1549	0.154349	16.6395	1549	0.178488	16.6341	1549	0.183137	16.6338
1550	0.152738	16.6458	1550	0.176069	16.6403	1550	0.181012	16.6403
1551	0.150851	16.652	1551	0.173703	16.6466	1551	0.178645	16.6465
1552	0.149134	16.6582	1552	0.171466	16.653	1552	0.176039	16.6528
1553	0.147293	16.6644	1553	0.169	16.6592	1553	0.173875	16.659
1554	0.145444	16.6707	1554	0.166853	16.6654	1554	0.171392	16.6652
1555	0.143523	16.6769	1555	0.164713	16.6717	1555	0.169228	16.6714
1556	0.141566	16.6831	1556	0.163064	16.6779	1556	0.166929	16.6776
1557	0.139905	16.6895	1557	0.160835	16.6841	1557	0.165365	16.6839
1558	0.138203	16.6958	1558	0.158835	16.6903	1558	0.163256	16.6901
1559	0.136743	16.702	1559	0.156594	16.6966	1559	0.161168	16.6965
1560	0.13498	16.7082	1560	0.154763	16.7028	1560	0.159003	16.7028
1561	0.133559	16.7144	1561	0.152694	16.7092	1561	0.157146	16.709
1562	0.131898	16.7207	1562	0.150784	16.7155	1562	0.155236	16.7152
1563	0.13051	16.7269	1563	0.149135	16.7217	1563	0.15333	16.7214
1564	0.129189	16.7331	1564	0.14745	16.7279	1564	0.151516	16.7277
1565	0.128123	16.7395	1565	0.145565	16.7341	1565	0.149391	16.7339
1566	0.126879	16.7458	1566	0.143601	16.7404	1566	0.147347	16.7401
1567	0.125571	16.752	1567	0.141937	16.7466	1567	0.145206	16.7465
1568	0.124229	16.7582	1568	0.139923	16.7528	1568	0.143686	16.7528
1569	0.122853	16.7644	1569	0.138059	16.7593	1569	0.141753	16.759
1570	0.121655	16.7707	1570	0.135855	16.7655	1570	0.139899	16.7652
1571	0.120233	16.7769	1571	0.134044	16.7717	1571	0.137611	16.7714
1572	0.119033	16.7831	1572	0.132023	16.7779	1572	0.135694	16.7777
1573	0.117422	16.7893	1573	0.130069	16.7841	1573	0.1337	16.7839
1574	0.115868	16.7958	1574	0.128012	16.7904	1574	0.131902	16.7901
1575	0.11407	16.802	1575	0.126166	16.7966	1575	0.130183	16.7963
1576	0.112625	16.8082	1576	0.124176	16.8028	1576	0.128373	16.8028
1577	0.11104	16.8145	1577	0.122413	16.809	1577	0.126599	16.809
1578	0.109518	16.8207	1578	0.120854	16.8155	1578	0.124781	16.8152
1579	0.108017	16.8269	1579	0.119312	16.8217	1579	0.12313	16.8214
1580	0.106581	16.8331	1580	0.11804	16.8279	1580	0.121144	16.8277
1581	0.105241	16.8394	1581	0.116667	16.8342	1581	0.119477	16.8339
1582	0.103808	16.8457	1582	0.11557	16.8404	1582	0.117556	16.8401
1583	0.102749	16.852	1583	0.113839	16.8466	1583	0.115849	16.8463
1584	0.101577	16.8582	1584	0.112244	16.8528	1584	0.114114	16.8527
1585	0.1006	16.8645	1585	0.110513	16.859	1585	0.112638	16.859
1586	0.0993373	16.8707	1586	0.109086	16.8655	1586	0.111035	16.8652
1587	0.0983409	16.8769	1587	0.107322	16.8717	1587	0.109555	16.8715
1588	0.0971908	16.8831	1588	0.105616	16.8779	1588	0.107964	16.8777
1589	0.0961464	16.8894	1589	0.103949	16.8842	1589	0.106547	16.8839
1590	0.0950035	16.8956	1590	0.102297	16.8904	1590	0.105298	16.8901
1591	0.093971	16.902	1591	0.100601	16.8966	1591	0.104093	16.8964
1592	0.092869	16.9083	1592	0.098752	16.9028	1592	0.102987	16.9026
1593	0.0917213	16.9145	1593	0.097411	16.9091	1593	0.101702	16.909
1594	0.0905976	16.9207	1594	0.09587	16.9153	1594	0.100389	16.9152
1595	0.0894235	16.9269	1595	0.094397	16.9217	1595	0.098865	16.9215
1596	0.0883959	16.9332	1596	0.092723	16.9279	1596	0.097528	16.9277
1597	0.0870705	16.9394	1597	0.091475	16.9342	1597	0.09571	16.9339
1598	0.0859564	16.9456	1598	0.090468	16.9404	1598	0.094119	16.9401
1599	0.0848448	16.9519	1599	0.089547	16.9466	1599	0.092368	16.9463
1600	0.0838892	16.9583	1600	0.088095	16.9528	1600	0.090789	16.9526
1601	0.082535	16.9645	1601	0.086794	16.9591	1601	0.089173	16.9589
1602	0.0813777	16.9707	1602	0.085471	16.9653	1602	0.087737	16.9653
1603	0.0802084	16.9769	1603	0.084177	16.9717	1603	0.086174	16.9715
1604	0.0791255	16.9832	1604	0.083013	16.9779	1604	0.08459	16.9777
1605	0.0781627	16.9894	1605	0.081851	16.9842	1605	0.083098	16.9839
1606	0.0773416	16.9956	1606	0.080833	16.9904	1606	0.081575	16.9901
1607	0.0765829	17.0018	1607	0.079665	16.9966	1607	0.080532	16.9964
1608	0.0757233	17.0083	1608	0.078288	17.0028	1608	0.079506	17.0026
1609	0.0746789	17.0145	1609	0.076725	17.0091	1609	0.078579	17.0088
1610	0.0733991	17.0207	1610	0.075732	17.0153	1610	0.07727	17.0153
1611	0.0725372	17.027	1611	0.074675	17.0215	1611	0.076029	17.0215
1612	0.071632	17.0332	1612	0.07384	17.028	1612	0.074505	17.0277
1613	0.0708204	17.0394	1613	0.0727	17.0342	1613	0.073307	17.0339
1614	0.0700185	17.0456	1614	0.071632	17.0404	1614	0.072344	17.0402
1615	0.0691877	17.0518	1615	0.07046	17.0466	1615	0.071501	17.0464
1616	0.0680641	17.0581	1616	0.069359	17.0529	1616	0.070315	17.0526
1617	0.0671781	17.0645	1617	0.068094	17.0591	1617	0.069082	17.0588
1618	0.0661937	17.0707	1618	0.06685	17.0653	1618	0.067877	17.065
1619	0.0653653	17.077	1619	0.065718	17.0715	1619	0.066795	17.0715
1620	0.0647386	17.0832	1620	0.064585	17.0778	1620	0.065951	17.0777
1621	0.0641192	17.0894	1621	0.063506	17.0842	1621	0.065024	17.084
1622	0.0634565	17.0956	1622	0.062423	17.0904	1622	0.06434	17.0902
1623	0.0627362	17.1018	1623	0.061549	17.0967	1623	0.06358	17.0964
1624	0.061903	17.1081	1624	0.060445	17.1029	1624	0.062673	17.1026
1625	0.0609739	17.1145	1625	0.059455	17.1091	1625	0.061638	17.1088
1626	0.0603016	17.1207	1626	0.058373	17.1153	1626	0.061042	17.1151
1627	0.0595693	17.127	1627	0.057599	17.1215	1627	0.060286	17.1215
1628	0.0589882	17.1332	1628	0.056939	17.1277	1628	0.059482	17.1277
1629	0.0583255	17.1394	1629	0.056355	17.1342	1629	0.05848	17.1339
1630	0.0576653	17.1456	1630	0.055663	17.1404	1630	0.057612	17.1402
1631	0.0568681	17.1519	1631	0.055032	17.1467	1631	0.056614	17.1464
1632	0.0561646	17.1581	1632	0.054193	17.1529	1632	0.055567	17.1526
1633	0.0553963	17.1643	1633	0.053502	17.1591	1633	0.054358	17.1588
1634	0.0547408	17.1708	1634	0.052799	17.1653	1634	0.053037	17.1651
1635	0.0540613	17.177	1635	0.052	17.1715	1635	0.051887	17.1713
1636	0.0533794	17.1832	1636	0.051337	17.1778	1636	0.050857	17.1777
1637	0.0526447	17.1894	1637	0.050702	17.184	1637	0.050009	17.184
1638	0.0518884	17.1956	1638	0.049817	17.1904	1638	0.04907	17.1902
1639	0.0512665	17.2019	1639	0.048501	17.1967	1639	0.048326	17.1964
1640	0.0506879	17.2081	1640	0.047344	17.2029	1640	0.047491	17.2026
1641	0.0501116	17.2143	1641	0.046584	17.2091	1641	0.046922	17.2089
1642	0.0493193	17.2208	1642	0.04606	17.2153	1642	0.046154	17.2151
1643	0.0486398	17.227	1643	0.045218	17.2216	1643	0.045617	17.2213
1644	0.0479531	17.2332	1644	0.044605	17.2278	1644	0.044941	17.2278
1645	0.0473433	17.2394	1645	0.044107	17.234	1645	0.044173	17.234
1646	0.0464885	17.2457	1646	0.043573	17.2405	1646	0.04323	17.2402
1647	0.0457562	17.2519	1647	0.04273	17.2467	1647	0.042279	17.2464
1648	0.0452784	17.2581	1648	0.041942	17.2529	1648	0.041468	17.2526
1649	0.0447838	17.2643	1649	0.04163	17.2591	1649	0.040708	17.2589
1650	0.0441091	17.2705	1650	0.041325	17.2654	1650	0.039972	17.2651
1651	0.0435665	17.277	1651	0.040447	17.2716	1651	0.03914	17.2713
1652	0.0431319	17.2832	1652	0.039207	17.2778	1652	0.038516	17.2775
1653	0.0426637	17.2894	1653	0.038382	17.284	1653	0.037525	17.284
1654	0.0421883	17.2957	1654	0.037759	17.2902	1654	0.036833	17.2902
1655	0.0417537	17.3019	1655	0.037157	17.2967	1655	0.036391	17.2964
1656	0.0414512	17.3081	1656	0.036196	17.3029	1656	0.036033	17.3026
1657	0.041007	17.3143	1657	0.035493	17.3091	1657	0.035516	17.3089
1658	0.0403755	17.3206	1658	0.034963	17.3153	1658	0.034927	17.3151
1659	0.0397609	17.327	1659	0.034396	17.3216	1659	0.034179	17.3213
1660	0.0392975	17.3332	1660	0.033583	17.3278	1660	0.033467	17.3275
1661	0.0388029	17.3395	1661	0.03288	17.334	1661	0.032767	17.334
1662	0.0384091	17.3457	1662	0.032558	17.3402	1662	0.032086	17.3402
1663	0.0378545	17.3519	1663	0.032203	17.3467	1663	0.03178	17.3464
1664	0.0373166	17.3581	1664	0.031536	17.3529	1664	0.03147	17.3527
1665	0.0366659	17.3643	1665	0.030755	17.3591	1665	0.030881	17.3589
1666	0.0361473	17.3706	1666	0.030285	17.3654	1666	0.030121	17.3651
1667	0.0358328	17.3768	1667	0.029722	17.3716	1667	0.029516	17.3713
1668	0.0355375	17.3832	1668	0.029131	17.3778	1668	0.028824	17.3775
1669	0.0351413	17.3895	1669	0.028597	17.384	1669	0.028235	17.3838
1670	0.0346899	17.3957	1670	0.028267	17.3903	1670	0.027459	17.3902
1671	0.0342913	17.4019	1671	0.028048	17.3965	1671	0.026775	17.3965
1672	0.033912	17.4081	1672	0.027801	17.4029	1672	0.026381	17.4027
1673	0.0336623	17.4144	1673	0.027199	17.4092	1673	0.026019	17.4089
1674	0.0333285	17.4206	1674	0.026672	17.4154	1674	0.025613	17.4151
1675	0.0330788	17.4268	1675	0.026342	17.4216	1675	0.025275	17.4213
1676	0.0327643	17.4332	1676	0.026081	17.4278	1676	0.024989	17.4276
1677	0.0323633	17.4395	1677	0.025747	17.434	1677	0.02467	17.4338
1678	0.0318447	17.4457	1678	0.02527	17.4403	1678	0.024404	17.4401
1679	0.0314077	17.4519	1679	0.024747	17.4465	1679	0.024082	17.4465
1680	0.0310067	17.4581	1680	0.024235	17.4529	1680	0.02393	17.4527
1681	0.0305986	17.4644	1681	0.023697	17.4592	1681	0.023688	17.4589
1682	0.0303177	17.4706	1682	0.023184	17.4654	1682	0.023226	17.4651
1683	0.0301016	17.4768	1683	0.02298	17.4716	1683	0.022753	17.4714
1684	0.0297174	17.483	1684	0.022492	17.4778	1684	0.022323	17.4776
1685	0.0293284	17.4895	1685	0.021926	17.4841	1685	0.02183	17.4838
1686	0.0291171	17.4957	1686	0.021206	17.4903	1686	0.021452	17.49
1687	0.0289803	17.5019	1687	0.020643	17.4965	1687	0.021102	17.4965
1688	0.0288794	17.5081	1688	0.020238	17.5027	1688	0.020811	17.5027
1689	0.028733	17.5144	1689	0.019826	17.5092	1689	0.020632	17.5089
1690	0.0285769	17.5206	1690	0.019528	17.5154	1690	0.020513	17.5151
1691	0.0283584	17.5268	1691	0.01927	17.5216	1691	0.02027	17.5214
1692	0.0280007	17.533	1692	0.018783	17.5278	1692	0.01994	17.5276
1693	0.0276093	17.5393	1693	0.018123	17.5341	1693	0.019638	17.5338
1694	0.0274652	17.5457	1694	0.01779	17.5403	1694	0.019363	17.54
1695	0.0273116	17.5519	1695	0.017481	17.5465	1695	0.019105	17.5463
1696	0.0270547	17.5582	1696	0.017324	17.5527	1696	0.018778	17.5527
1697	0.0266873	17.5644	1697	0.017259	17.5591	1697	0.018504	17.5589
1698	0.02638	17.5706	1698	0.017162	17.5654	1698	0.018277	17.5651
1699	0.0259574	17.5768	1699	0.016872	17.5716	1699	0.017999	17.5714
1700	0.0255396	17.5831	1700	0.016431	17.5779	1700	0.017637	17.5776
1701	0.0252155	17.5893	1701	0.015954	17.5841	1701	0.017458	17.5838
1702	0.0249178	17.5957	1702	0.015675	17.5903	1702	0.017036	17.59
1703	0.0244976	17.6019	1703	0.015488	17.5965	1703	0.01655	17.5963
1704	0.0239574	17.6082	1704	0.015252	17.6027	1704	0.016168	17.6027
1705	0.0235708	17.6144	1705	0.01504	17.609	1705	0.015854	17.6089
1706	0.0232971	17.6206	1706	0.014847	17.6154	1706	0.01558	17.6152
1707	0.0230546	17.6268	1707	0.014585	17.6216	1707	0.015289	17.6214
1708	0.0227592	17.6331	1708	0.014345	17.6279	1708	0.015035	17.6276
1709	0.0225984	17.6393	1709	0.014284	17.6341	1709	0.014864	17.6338
1710	0.0223463	17.6455	1710	0.014212	17.6403	1710	0.014728	17.64
1711	0.0220654	17.652	1711	0.014105	17.6465	1711	0.014581	17.6463
1712	0.0218373	17.6582	1712	0.013915	17.6527	1712	0.014692	17.6525
1713	0.0217556	17.6644	1713	0.013854	17.659	1713	0.014386	17.6589
1714	0.0215107	17.6706	1714	0.013804	17.6653	1714	0.013976	17.6652
1715	0.021153	17.6769	1715	0.013703	17.6716	1715	0.013718	17.6714
1716	0.0208456	17.6831	1716	0.013445	17.6779	1716	0.013483	17.6776
1717	0.0206247	17.6893	1717	0.013155	17.6841	1717	0.013312	17.6838
1718	0.020375	17.6955	1718	0.012732	17.6903	1718	0.013053	17.6901
1719	0.0201013	17.702	1719	0.012298	17.6965	1719	0.012807	17.6963
1720	0.0198444	17.7082	1720	0.011976	17.7028	1720	0.01262	17.7025
1721	0.0194627	17.7144	1721	0.011721	17.709	1721	0.012238	17.709
1722	0.0191577	17.7206	1722	0.011456	17.7152	1722	0.01178	17.7152
1723	0.0191793	17.7269	1723	0.011126	17.7217	1723	0.011856	17.7214
1724	0.0194819	17.7331	1724	0.010753	17.7279	1724	0.012023	17.7276
1725	0.0197412	17.7393	1725	0.010305	17.7341	1725	0.012134	17.7339
1726	0.0198276	17.7455	1726	0.010069	17.7403	1726	0.012393	17.7401
1727	0.0196739	17.7517	1727	0.010015	17.7465	1727	0.012528	17.7463
1728	0.0195971	17.7582	1728	0.010044	17.7528	1728	0.012309	17.7525
1729	0.0196427	17.7644	1729	0.009933	17.759	1729	0.012011	17.7587
1730	0.019818	17.7706	1730	0.009725	17.7652	1730	0.011637	17.7652
1731	0.0200965	17.7769	1731	0.009649	17.7715	1731	0.01151	17.7714
1732	0.0202286	17.7831	1732	0.009678	17.7779	1732	0.011713	17.7776
1733	0.0200125	17.7893	1733	0.009624	17.7841	1733	0.011848	17.7839
1734	0.01977	17.7955	1734	0.009585	17.7903	1734	0.011764	17.7901
1735	0.0195851	17.8018	1735	0.009732	17.7966	1735	0.011526	17.7963
1736	0.0193186	17.8082	1736	0.009879	17.8028	1736	0.011056	17.8025
1737	0.0192346	17.8144	1737	0.009717	17.809	1737	0.010567	17.8087
1738	0.0191025	17.8207	1738	0.009284	17.8152	1738	0.010455	17.8152
1739	0.018896	17.8269	1739	0.009022	17.8214	1739	0.010424	17.8214
1740	0.0187255	17.8331	1740	0.008807	17.8279	1740	0.01044	17.8276
1741	0.0185839	17.8393	1741	0.008427	17.8341	1741	0.010467	17.8339
1742	0.0183822	17.8455	1742	0.008133	17.8403	1742	0.010312	17.8401
1743	0.0181613	17.8518	1743	0.00799	17.8466	1743	0.00968	17.8463
1744	0.0180028	17.858	1744	0.007775	17.8528	1744	0.009146	17.8525
1745	0.0178732	17.8644	1745	0.00742	17.859	1745	0.008912	17.8588
1746	0.0177891	17.8707	1746	0.007054	17.8652	1746	0.008868	17.865
1747	0.0176187	17.8769	1747	0.006853	17.8715	1747	0.00892	17.8714
1748	0.0175058	17.8831	1748	0.006932	17.8777	1748	0.008944	17.8776
1749	0.0174314	17.8893	1749	0.006983	17.8841	1749	0.008765	17.8839
1750	0.0173041	17.8956	1750	0.006979	17.8904	1750	0.008383	17.8901
1751	0.0170424	17.9018	1751	0.006936	17.8966	1751	0.007973	17.8963
1752	0.0168431	17.908	1752	0.006836	17.9028	1752	0.007527	17.9025
1753	0.0167471	17.9144	1753	0.006972	17.909	1753	0.007511	17.9088
1754	0.0166463	17.9207	1754	0.007223	17.9153	1754	0.007543	17.915
1755	0.0165478	17.9269	1755	0.007233	17.9215	1755	0.007332	17.9214
1756	0.0164974	17.9331	1756	0.007147	17.9277	1756	0.007205	17.9277
1757	0.0165526	17.9393	1757	0.007018	17.9341	1757	0.00709	17.9339
1758	0.0166198	17.9456	1758	0.006914	17.9404	1758	0.006541	17.9401
1759	0.0165886	17.9518	1759	0.006757	17.9466	1759	0.005968	17.9463
1760	0.0164806	17.958	1760	0.006538	17.9528	1760	0.006047	17.9526
1761	0.0165142	17.9642	1761	0.006377	17.959	1761	0.006425	17.9588
1762	0.0166078	17.9707	1762	0.006205	17.9653	1762	0.006676	17.965
1763	0.0166198	17.9769	1763	0.005796	17.9715	1763	0.006712	17.9712
1764	0.016555	17.9831	1764	0.005395	17.9777	1764	0.0067	17.9777
1765	0.0164662	17.9894	1765	0.005273	17.9839	1765	0.006672	17.9839
1766	0.0163869	17.9956	1766	0.005133	17.9904	1766	0.006453	17.9901
1767	0.0162837	18.0018	1767	0.004986	17.9966	1767	0.006187	17.9963
1768	0.0161132	18.008	1768	0.004703	18.0028	1768	0.006342	18.0026
1769	0.0160004	18.0142	1769	0.004491	18.009	1769	0.006903	18.0088
1770	0.0159115	18.0206	1770	0.004606	18.0153	1770	0.007026	18.015
1771	0.0157795	18.0269	1771	0.004796	18.0215	1771	0.00697	18.0212
1772	0.015561	18.0331	1772	0.004904	18.0277	1772	0.007094	18.0276
1773	0.0153353	18.0394	1773	0.004943	18.0339	1773	0.007157	18.0339
1774	0.0152008	18.0456	1774	0.004964	18.0404	1774	0.007157	18.0401
1775	0.0151048	18.0518	1775	0.004964	18.0466	1775	0.007169	18.0464
1776	0.0149703	18.058	1776	0.004975	18.0528	1776	0.007181	18.0526
1777	0.0148023	18.0643	1777	0.004868	18.059	1777	0.007312	18.0588
1778	0.0147374	18.0705	1778	0.004907	18.0653	1778	0.007543	18.065
1779	0.0147927	18.0769	1779	0.005007	18.0715	1779	0.007428	18.0712
1780	0.0149055	18.0832	1780	0.004861	18.0777	1780	0.007185	18.0775
1781	0.015088	18.0894	1781	0.00471	18.0839	1781	0.006855	18.0839
1782	0.0153017	18.0956	1782	0.004624	18.0902	1782	0.006596	18.0901
1783	0.0152177	18.1018	1783	0.004534	18.0966	1783	0.006584	18.0964
1784	0.015088	18.108	1784	0.004463	18.1028	1784	0.006489	18.1026
1785	0.0150904	18.1143	1785	0.00442	18.1091	1785	0.006393	18.1088
1786	0.0151672	18.1205	1786	0.004427	18.1153	1786	0.006385	18.115
1787	0.0152681	18.1268	1787	0.004498	18.1215	1787	0.006282	18.1212
1788	0.0153185	18.1332	1788	0.004524	18.1277	1788	0.005948	18.1275
1789	0.0152104	18.1394	1789	0.004509	18.134	1789	0.005649	18.1338
1790	0.0150472	18.1456	1790	0.004513	18.1402	1790	0.005657	18.1401
1791	0.0147999	18.1518	1791	0.004377	18.1466	1791	0.005769	18.1464
1792	0.0144757	18.1581	1792	0.00419	18.1529	1792	0.005765	18.1526
1793	0.0144853	18.1643	1793	0.00404	18.1591	1793	0.005757	18.1588
1794	0.0145598	18.1705	1794	0.003871	18.1653	1794	0.005884	18.1651
1795	0.0144661	18.1767	1795	0.003696	18.1715	1795	0.005988	18.1713
1796	0.0143389	18.1832	1796	0.003563	18.1777	1796	0.005988	18.1775
1797	0.0142188	18.1894	1797	0.003481	18.184	1797	0.005916	18.1837
1798	0.0139835	18.1956	1798	0.003516	18.1902	1798	0.00598	18.1902
1799	0.0137722	18.2018	1799	0.003527	18.1964	1799	0.006115	18.1964
1800	0.013753	18.2081	1800	0.003506	18.2029	1800	0.006071	18.2026
1801	0.0138443	18.2143	1801	0.003516	18.2091	1801	0.005932	18.2088
1802	0.0139019	18.2205	1802	0.003602	18.2153	1802	0.005828	18.2151
1803	0.0138347	18.2267	1803	0.003724	18.2215	1803	0.005578	18.2213
1804	0.0137386	18.233	1804	0.003757	18.2278	1804	0.005248	18.2275
1805	0.0136906	18.2394	1805	0.003703	18.234	1805	0.005092	18.2337
1806	0.0135778	18.2456	1806	0.003631	18.2402	1806	0.005128	18.24
1807	0.0133257	18.2518	1807	0.003599	18.2464	1807	0.005236	18.2464
1808	0.0131936	18.2581	1808	0.003541	18.2528	1808	0.005319	18.2526
1809	0.0131816	18.2643	1809	0.003617	18.2591	1809	0.005383	18.2588
1810	0.0130375	18.2705	1810	0.003714	18.2653	1810	0.005375	18.2651
1811	0.0128935	18.2767	1811	0.003817	18.2715	1811	0.005339	18.2713
1812	0.0128911	18.283	1812	0.003893	18.2778	1812	0.005427	18.2775
1813	0.0129271	18.2894	1813	0.003968	18.284	1813	0.005697	18.2837
1814	0.0128767	18.2956	1814	0.004151	18.2902	1814	0.006027	18.29
1815	0.0127494	18.3019	1815	0.004373	18.2964	1815	0.006206	18.2964
1816	0.0126294	18.3081	1816	0.004559	18.3026	1816	0.006159	18.3026
1817	0.0126918	18.3143	1817	0.004606	18.3091	1817	0.006103	18.3088
1818	0.0128526	18.3205	1818	0.004567	18.3153	1818	0.006222	18.3151
1819	0.0129127	18.3268	1819	0.00447	18.3216	1819	0.006413	18.3213
1820	0.0129775	18.333	1820	0.004412	18.3278	1820	0.006501	18.3275
1821	0.0129607	18.3392	1821	0.004298	18.334	1821	0.006461	18.3337
1822	0.0129847	18.3456	1822	0.004111	18.3402	1822	0.006183	18.34
1823	0.0130928	18.3519	1823	0.003839	18.3464	1823	0.005781	18.3462
1824	0.0132848	18.3581	1824	0.003387	18.3527	1824	0.005458	18.3526
1825	0.0135177	18.3643	1825	0.002993	18.3589	1825	0.005264	18.3589
1826	0.013705	18.3705	1826	0.002674	18.3653	1826	0.0051	18.3651
1827	0.0137914	18.3768	1827	0.002455	18.3715	1827	0.004802	18.3713
1828	0.0136834	18.383	1828	0.002506	18.3778	1828	0.004352	18.3775
1829	0.0134385	18.3892	1829	0.002506	18.384	1829	0.004122	18.3837
1830	0.0132512	18.3957	1830	0.002412	18.3902	1830	0.004082	18.39
1831	0.0132392	18.4019	1831	0.002369	18.3964	1831	0.004098	18.3962
1832	0.0131504	18.4081	1832	0.002477	18.4027	1832	0.004209	18.4026
1833	0.0130399	18.4143	1833	0.002703	18.4089	1833	0.004313	18.4089
1834	0.0128959	18.4206	1834	0.003144	18.4154	1834	0.004281	18.4151
1835	0.0128406	18.4268	1835	0.00361	18.4216	1835	0.004201	18.4213
1836	0.0128815	18.433	1836	0.003878	18.4278	1836	0.004233	18.4275
1837	0.0129127	18.4392	1837	0.003911	18.434	1837	0.00438	18.4338
1838	0.0130183	18.4454	1838	0.003735	18.4402	1838	0.00448	18.44
1839	0.013316	18.4519	1839	0.003606	18.4465	1839	0.004329	18.4462
1840	0.0135754	18.4581	1840	0.003545	18.4527	1840	0.004313	18.4524
1841	0.013621	18.4643	1841	0.00361	18.4589	1841	0.004352	18.4589
1842	0.013621	18.4706	1842	0.003588	18.4651	1842	0.00411	18.4651
1843	0.013621	18.4768	1843	0.003502	18.4716	1843	0.00399	18.4713
1844	0.0135537	18.483	1844	0.003377	18.4778	1844	0.004229	18.4775
1845	0.0133905	18.4892	1845	0.003072	18.484	1845	0.004404	18.4838
1846	0.0132848	18.4954	1846	0.002868	18.4902	1846	0.004344	18.49
1847	0.0132488	18.5019	1847	0.002961	18.4965	1847	0.004281	18.4962
1848	0.0132272	18.5081	1848	0.003054	18.5027	1848	0.004201	18.5024
1849	0.0131456	18.5143	1849	0.003007	18.5089	1849	0.004054	18.5089
1850	0.0130303	18.5206	1850	0.002875	18.5151	1850	0.003788	18.5151
1851	0.0129607	18.5268	1851	0.002688	18.5216	1851	0.003557	18.5213
1852	0.0129199	18.533	1852	0.002595	18.5278	1852	0.003704	18.5276
1853	0.0128887	18.5392	1853	0.002531	18.534	1853	0.003951	18.5338
1854	0.0129055	18.5455	1854	0.002463	18.5403	1854	0.003939	18.54
1855	0.0128839	18.5517	1855	0.002541	18.5465	1855	0.003903	18.5462
1856	0.0127974	18.5581	1856	0.002692	18.5527	1856	0.004018	18.5524
1857	0.0127734	18.5643	1857	0.002785	18.5589	1857	0.004205	18.5587
1858	0.0127518	18.5706	1858	0.002771	18.5651	1858	0.004468	18.5651
1859	0.0125765	18.5768	1859	0.002828	18.5714	1859	0.00481	18.5713
1860	0.0123989	18.583	1860	0.002929	18.5778	1860	0.005124	18.5776
1861	0.0123508	18.5892	1861	0.002961	18.584	1861	0.005311	18.5838
1862	0.0123484	18.5955	1862	0.002961	18.5903	1862	0.005399	18.59
1863	0.012382	18.6017	1863	0.002997	18.5965	1863	0.005454	18.5962
1864	0.0124445	18.6081	1864	0.002989	18.6027	1864	0.005534	18.6025
1865	0.0124925	18.6144	1865	0.002911	18.6089	1865	0.005721	18.6087
1866	0.0124997	18.6206	1866	0.002846	18.6151	1866	0.005972	18.6151
1867	0.0124325	18.6268	1867	0.002921	18.6214	1867	0.005944	18.6213
1868	0.0123556	18.633	1868	0.003047	18.6278	1868	0.005546	18.6276
1869	0.0124685	18.6393	1869	0.003011	18.634	1869	0.005108	18.6338
1870	0.0126534	18.6455	1870	0.002993	18.6403	1870	0.004782	18.64
1871	0.0126966	18.6517	1871	0.002946	18.6465	1871	0.004559	18.6462
1872	0.0124853	18.6579	1872	0.002839	18.6527	1872	0.004567	18.6525
1873	0.01225	18.6644	1873	0.002602	18.659	1873	0.004508	18.6587
1874	0.0120867	18.6706	1874	0.002409	18.6652	1874	0.004317	18.6649
1875	0.0119859	18.6768	1875	0.002194	18.6714	1875	0.00401	18.6714
1876	0.0119835	18.683	1876	0.0019	18.6776	1876	0.003716	18.6776
1877	0.0120243	18.6893	1877	0.001595	18.6841	1877	0.003668	18.6838
1878	0.0121636	18.6955	1878	0.00138	18.6903	1878	0.003903	18.69
1879	0.0123292	18.7017	1879	0.001355	18.6965	1879	0.004078	18.6963
1880	0.012382	18.7079	1880	0.001359	18.7027	1880	0.004233	18.7025
1881	0.0124037	18.7142	1881	0.001333	18.709	1881	0.00452	18.7087
1882	0.0126534	18.7206	1882	0.001201	18.7152	1882	0.004524	18.7149
1883	0.0129007	18.7268	1883	0.001194	18.7214	1883	0.004376	18.7212
1884	0.0130663	18.7331	1884	0.001247	18.7276	1884	0.004341	18.7276
1885	0.013196	18.7393	1885	0.001387	18.734	1885	0.004293	18.7338
1886	0.0132608	18.7455	1886	0.001538	18.7403	1886	0.004165	18.74
1887	0.01322	18.7517	1887	0.001566	18.7465	1887	0.00405	18.7463
1888	0.0130855	18.7579	1888	0.001545	18.7527	1888	0.004038	18.7525
1889	0.0128887	18.7642	1889	0.001498	18.759	1889	0.004229	18.7587
1890	0.0127254	18.7706	1890	0.001305	18.7652	1890	0.004368	18.7649
1891	0.0126053	18.7768	1891	0.001129	18.7714	1891	0.004305	18.7711
1892	0.0124925	18.7831	1892	0.001158	18.7776	1892	0.004269	18.7776
1893	0.0125093	18.7893	1893	0.001219	18.7839	1893	0.00442	18.7838
1894	0.012651	18.7955	1894	0.00129	18.7903	1894	0.004619	18.7901
1895	0.0127494	18.8017	1895	0.001459	18.7965	1895	0.004683	18.7963
1896	0.0126966	18.808	1896	0.001674	18.8027	1896	0.004432	18.8025
1897	0.0127542	18.8142	1897	0.001961	18.809	1897	0.004185	18.8087
1898	0.0129463	18.8204	1898	0.002194	18.8152	1898	0.004146	18.8149
1899	0.013136	18.8269	1899	0.00229	18.8214	1899	0.003947	18.8212
1900	0.0132464	18.8331	1900	0.002516	18.8276	1900	0.003803	18.8274
1901	0.0133497	18.8393	1901	0.00271	18.8339	1901	0.003728	18.8338
1902	0.0133905	18.8455	1902	0.00281	18.8402	1902	0.003589	18.8401
1903	0.0132968	18.8517	1903	0.002778	18.8465	1903	0.003394	18.8463
1904	0.0130159	18.858	1904	0.002667	18.8528	1904	0.003095	18.8525
1905	0.012783	18.8642	1905	0.002678	18.859	1905	0.002924	18.8587
1906	0.0128863	18.8704	1906	0.002735	18.8652	1906	0.003195	18.865
1907	0.0130711	18.8769	1907	0.002696	18.8714	1907	0.003604	18.8712
1908	0.0129847	18.8831	1908	0.00267	18.8777	1908	0.003811	18.8774
1909	0.0127302	18.8893	1909	0.002696	18.8839	1909	0.004078	18.8838
1910	0.0126149	18.8955	1910	0.002642	18.8901	1910	0.004237	18.8901
1911	0.0126318	18.9018	1911	0.002692	18.8966	1911	0.004301	18.8963
1912	0.0127158	18.908	1912	0.002825	18.9028	1912	0.004468	18.9025
1913	0.012831	18.9142	1913	0.003004	18.909	1913	0.004603	18.9088
1914	0.0130039	18.9204	1914	0.003136	18.9152	1914	0.004794	18.915
1915	0.0129487	18.9266	1915	0.003072	18.9214	1915	0.004985	18.9212
1916	0.0127086	18.9331	1916	0.003061	18.9277	1916	0.005037	18.9274
1917	0.0123748	18.9393	1917	0.003079	18.9339	1917	0.00481	18.9336
1918	0.0121924	18.9455	1918	0.002954	18.9401	1918	0.004543	18.9401
1919	0.0123748	18.9518	1919	0.002882	18.9464	1919	0.004134	18.9463
1920	0.0125645	18.958	1920	0.002889	18.9528	1920	0.003684	18.9525
1921	0.0125981	18.9642	1921	0.00285	18.959	1921	0.003485	18.9587
1922	0.0126077	18.9704	1922	0.002581	18.9652	1922	0.003493	18.965
1923	0.0125717	18.9767	1923	0.002212	18.9715	1923	0.003545	18.9712
1924	0.0125165	18.9831	1924	0.001989	18.9777	1924	0.003581	18.9774
1925	0.0127038	18.9893	1925	0.002018	18.9839	1925	0.003648	18.9836
1926	0.0128575	18.9955	1926	0.001875	18.9901	1926	0.003684	18.9901
1927	0.0129895	19.0018	1927	0.001563	18.9963	1927	0.003815	18.9963
1928	0.0133112	19.008	1928	0.001419	19.0028	1928	0.003843	19.0025
1929	0.0134553	19.0142	1929	0.001283	19.009	1929	0.003947	19.0088
1930	0.0132992	19.0204	1930	0.001161	19.0152	1930	0.003863	19.015
1931	0.0131288	19.0267	1931	0.000943	19.0215	1931	0.003585	19.0212
1932	0.0129247	19.0329	1932	0.000871	19.0277	1932	0.003223	19.0274
1933	0.0127182	19.0393	1933	0.000936	19.0339	1933	0.002904	19.0337
1934	0.0126101	19.0456	1934	0.000914	19.0401	1934	0.00267	19.0399
1935	0.0125645	19.0518	1935	0.00071	19.0464	1935	0.002483	19.0463
1936	0.0125909	19.058	1936	0.000574	19.0526	1936	0.002435	19.0525
1937	0.0126582	19.0642	1937	0.000613	19.059	1937	0.002471	19.0588
1938	0.0125549	19.0705	1938	0.000667	19.0652	1938	0.002498	19.065
1939	0.0124877	19.0767	1939	0.000767	19.0715	1939	0.002152	19.0712
1940	0.0125861	19.0829	1940	0.000936	19.0777	1940	0.002132	19.0774
1941	0.0125909	19.0893	1941	0.001165	19.0839	1941	0.00257	19.0837
1942	0.0126486	19.0956	1942	0.001319	19.0901	1942	0.002857	19.0899
1943	0.0127374	19.1018	1943	0.001466	19.0964	1943	0.002896	19.0963
1944	0.0127542	19.108	1944	0.00167	19.1026	1944	0.002864	19.1026
1945	0.0127398	19.1142	1945	0.001814	19.109	1945	0.002892	19.1088
1946	0.012687	19.1205	1946	0.0019	19.1152	1946	0.002829	19.115
1947	0.0125789	19.1267	1947	0.001964	19.1215	1947	0.002813	19.1212
1948	0.0124493	19.1329	1948	0.001771	19.1277	1948	0.002968	19.1274
1949	0.0122356	19.1391	1949	0.001462	19.1339	1949	0.00329	19.1337
1950	0.0120651	19.1456	1950	0.00129	19.1401	1950	0.003433	19.1399
1951	0.0120627	19.1518	1951	0.001255	19.1464	1951	0.003231	19.1461
1952	0.0120771	19.158	1952	0.001229	19.1526	1952	0.003107	19.1526
1953	0.012166	19.1643	1953	0.001147	19.1588	1953	0.003107	19.1588
1954	0.0123652	19.1705	1954	0.001029	19.1653	1954	0.003008	19.165
1955	0.0124661	19.1767	1955	0.000957	19.1715	1955	0.0029	19.1712
1956	0.0124013	19.1829	1956	0.000875	19.1777	1956	0.002956	19.1775
1957	0.0123604	19.1891	1957	0.000717	19.1839	1957	0.002864	19.1837
1958	0.012382	19.1955	1958	0.000789	19.1902	1958	0.002705	19.1899
1959	0.0124445	19.2018	1959	0.000753	19.1964	1959	0.002745	19.1961
1960	0.0125285	19.208	1960	0.000513	19.2026	1960	0.002781	19.2025
1961	0.0125837	19.2143	1961	0.000642	19.2088	1961	0.002741	19.2088
1962	0.0125717	19.2205	1962	0.00086	19.2153	1962	0.002674	19.215
1963	0.0124637	19.2267	1963	0.001054	19.2215	1963	0.002701	19.2212
1964	0.0121972	19.2329	1964	0.001194	19.2277	1964	0.002952	19.2275
1965	0.0119835	19.2391	1965	0.001111	19.2339	1965	0.003135	19.2337
1966	0.0119859	19.2454	1966	0.000993	19.2402	1966	0.003246	19.2399
1967	0.0120147	19.2518	1967	0.001086	19.2464	1967	0.003406	19.2461
1968	0.0120051	19.2581	1968	0.001333	19.2526	1968	0.003378	19.2523
1969	0.0120387	19.2643	1969	0.001645	19.2588	1969	0.003203	19.2588
1970	0.0120651	19.2705	1970	0.001642	19.265	1970	0.00327	19.265
1971	0.0120795	19.2767	1971	0.001208	19.2715	1971	0.003521	19.2712
1972	0.0121443	19.2829	1972	0.000996	19.2777	1972	0.00372	19.2775
1973	0.01219	19.2892	1973	0.00086	19.284	1973	0.003863	19.2837
1974	0.0122836	19.2954	1974	0.000756	19.2902	1974	0.003863	19.2899
1975	0.0124589	19.3017	1975	0.000828	19.2964	1975	0.00374	19.2961
1976	0.0125957	19.3081	1976	0.000932	19.3026	1976	0.003521	19.3024
1977	0.0125573	19.3143	1977	0.000893	19.3088	1977	0.003051	19.3087
1978	0.0124613	19.3205	1978	0.000695	19.3151	1978	0.002809	19.315
1979	0.0123845	19.3267	1979	0.000595	19.3215	1979	0.002884	19.3213
1980	0.0123556	19.3329	1980	0.000875	19.3277	1980	0.002845	19.3275
1981	0.0123436	19.3392	1981	0.001151	19.334	1981	0.002578	19.3337
1982	0.012334	19.3454	1982	0.001183	19.3402	1982	0.002311	19.3399
1983	0.01237	19.3516	1983	0.001197	19.3464	1983	0.002184	19.3462
1984	0.0124853	19.3581	1984	0.001208	19.3526	1984	0.00216	19.3524
1985	0.0125189	19.3643	1985	0.001294	19.3589	1985	0.002232	19.3586
1986	0.0123196	19.3705	1986	0.001405	19.3651	1986	0.002288	19.3651
1987	0.0122548	19.3767	1987	0.001473	19.3713	1987	0.00259	19.3713
1988	0.0122236	19.383	1988	0.001559	19.3777	1988	0.002984	19.3775
1989	0.0121275	19.3892	1989	0.001771	19.384	1989	0.003234	19.3837
1990	0.0120795	19.3954	1990	0.001946	19.3902	1990	0.003322	19.3899
1991	0.0120579	19.4016	1991	0.002011	19.3964	1991	0.003453	19.3962
1992	0.0120627	19.4079	1992	0.00205	19.4027	1992	0.003489	19.4024
1993	0.0120651	19.4143	1993	0.002043	19.4089	1993	0.003418	19.4086
1994	0.0119955	19.4205	1994	0.001968	19.4151	1994	0.003322	19.4149
1995	0.0119499	19.4267	1995	0.001789	19.4213	1995	0.003282	19.4213
1996	0.0121179	19.433	1996	0.001545	19.4277	1996	0.003231	19.4275
1997	0.0122308	19.4392	1997	0.001412	19.434	1997	0.003099	19.4337
1998	0.012346	19.4454	1998	0.001452	19.4402	1998	0.002912	19.44
[truncated: 89 more rows]
