# Supplementary material for: Design of amyloidogenic peptide traps
Source: Nat Chem Biol. 2024 Mar 19;20(8):981–90. doi: 10.1038/s41589-024-01578-5 (PMC11288891; doi:10.1038/s41589-024-01578-5)
Supplement: Supplementary file 16 — Statistical source data. [file 41589_2024_1578_MOESM16_ESM.xlsx]

## Sheet: Extended Data Fig. 7CD tempmelt
DSAA1_1			2DT2			DAm12			DAm14			DAm15			DTTR23
Temperature[C]	CD [mdeg]	HT [V]	Temperature[C]	CD [mdeg]	HT [V]	Temperature[C]	CD [mdeg]	HT [V]	Temperature[C]	CD [mdeg]	HT [V]	Temperature[C]	CD [mdeg]	HT [V]	Temperature[C]	CD [mdeg]	HT [V]
39200	-500751	330.68	38400	-552962	327987	39400	-259243	325446	39200	-510765	329176	39300	-360174	318433	39400	-364953	320749
61500	-499521	330843	62200	-554711	328043	61400	-262529	325482	61200	-511243	329132	62200	-360069	318.41	62900	-365136	320663
81400	-501935	330815	82700	-551541	328072	81600	-26.01	325586	81300	-508675	329255	82200	-360352	318482	82800	-363276	320643
101500	-502149	330879	102300	-55105	328.13	101200	-257961	325651	101000	-504569	329205	102100	-358096	318556	102900	-367571	320813
121000	-496565	330888	122100	-549102	328206	121100	-262785	325774	120900	-503756	329334	121900	-359366	318588	122900	-363925	320.88
140900	-495226	330938	141600	-545967	328376	140700	-260575	325785	140500	-503248	329444	141400	-35584	318662	142200	-363549	321004
160500	-489553	330887	161400	-541501	328395	160600	-260444	326008	160600	-493899	329514	161300	-351793	318845	162000	-361487	321107
180900	-491115	330985	181500	-54248	328464	180600	-261506	326089	180800	-489074	329609	181300	-354324	318864	181700	-358519	321172
201300	-489683	330971	202200	-541986	328437	201200	-258854	326234	200700	-492453	329561	201600	-352746	318904	202100	-358685	321252
221300	-489555	331103	222300	-542128	328475	221400	-256943	326281	221000	-486532	329611	221800	-354009	318948	222300	-357782	321285
241200	-482779	331108	242500	-537217	328615	241700	-256137	326449	241100	-488032	329.71	241800	-350553	318975	242300	-360965	321364
261100	-486646	331271	261600	-534192	328649	260800	-259204	326495	261000	-480318	329721	261800	-351165	318992	262200	-354793	321573
281200	-482156	331362	282000	-53201	328.77	281100	-258332	326558	280900	-479354	329724	281700	-35101	319077	282200	-351333	321497
301400	-482366	331432	302200	-529358	328781	301400	-25.32	326659	301100	-476645	329906	301900	-350473	319.05	302400	-352091	321636
321300	-47.58	331508	322200	-526533	328779	321300	-257967	326654	321000	-474131	329829	321800	-346283	319.07	322300	-35195	321727
341300	-476157	331517	342100	-524692	328824	341300	-256112	326714	341000	-470376	329866	341800	-346762	319101	342300	-348314	321828
361100	-477362	331664	361600	-517634	328943	361000	-254217	326684	361000	-473757	329694	361600	-341716	318884	362100	-349701	321992
381300	-473489	331804	382000	-518186	329021	381200	-255501	326878	381000	-468584	329718	381800	-343229	318853	382200	-350468	322064
401200	-471866	331928	402000	-518606	329118	401100	-254959	326951	401100	-470582	329717	401800	-341878	318732	402200	-343283	322151
421100	-469987	331862	422500	-515003	329098	421600	-253262	326924	421000	-465342	329634	421900	-341494	318894	422300	-342825	322119
441200	-468275	331911	442300	-514055	329136	441500	-253811	326994	441300	-456423	329651	442000	-341668	319058	442500	-343292	322261
461100	-467034	332182	461600	-504435	329329	460900	-254636	326.69	460900	-459534	329218	461600	-344652	318.88	462000	-337708	322323
481300	-461257	332295	481900	-500726	329.25	481000	-256212	326726	481000	-456199	329.2	481800	-343073	318916	482200	-33547	322355
501500	-463815	332324	502400	-501143	329329	501600	-261154	326745	501200	-456999	329195	502000	-339663	318.85	502300	-336364	322504
521600	-456053	332327	522500	-500573	329477	521600	-260087	326.88	521300	-456238	329303	522100	-339581	318952	522500	-332726	322466
542200	-450989	332377	542600	-497381	329432	541700	-254983	326951	541600	-447992	329.25	542300	-341329	318926	542600	-332087	322539
561600	-447041	332375	562000	-489352	329566	561300	-259405	326815	561400	-450216	329019	562000	-335869	318851	562400	-330118	322.71
581900	-449877	332.41	582600	-488257	329634	581800	-262399	326893	581500	-443667	329081	582300	-339032	318928	582600	-326762	322.77
602100	-445498	332516	602900	-485915	329681	601800	-26413	327037	601600	-447727	329112	602500	-336549	318.86	602800	-323938	322792
622300	-448103	332426	620300	-48483	329726	620600	-256394	326894	621800	-446225	329086	622700	-33388	318919	623100	-318189	322943
642200	-442635	332566	642500	-483522	329888	641700	-263499	326957	641700	-439835	329144	642600	-333407	318906	643000	-31914	322924
661900	-438897	332661	662500	-476785	329.94	661700	-26273	326829	661800	-437209	329392	662600	-332228	318971	663000	-317053	323147
680700	-435402	332.86	683200	-479209	330248	682200	-260561	326.87	681900	-438436	329409	682900	-327443	318989	683200	-313136	323265
700400	-439503	332866	700400	-47357	330322	700500	-255486	327114	700600	-436346	329472	700300	-324467	319071	700200	-312989	323395
722000	-431923	332881	720500	-466012	330384	720600	-258044	327104	720500	-431819	329495	720200	-323967	319142	720200	-308123	323555
740500	-42929	333049	740400	-465414	330441	740600	-255277	327305	740600	-427014	329568	740500	-325466	319178	740400	-307312	323657
760500	-432347	333319	760400	-460017	330497	760600	-252258	327341	760600	-424824	329592	760400	-319283	319202	760400	-302027	323861
780500	-425046	333397	780300	-456233	330601	780500	-254258	327.41	782100	-422782	329712	783100	-320457	319.22	783600	-302963	323911
800300	-423696	333543	800200	-457569	330701	800400	-253462	327541	800400	-416473	329675	800100	-314784	319371	800100	-30338	324.13
820400	-418325	333741	820400	-453498	330868	820600	-248691	327746	820500	-415363	329753	820400	-311894	319462	820300	-300986	324202
840400	-414837	333854	840300	-449141	330911	840500	-241905	327966	840500	-410024	329822	840300	-308605	319454	840100	-29321	324307
860300	-414651	334297	860300	-444567	331162	860500	-237619	328085	862900	-41.04	329.8	864000	-308921	319581	864600	-294703	324551
880400	-408957	334515	880300	-440888	331061	880500	-24.06	328337	880400	-402124	329829	880100	-306097	319719	880100	-289789	324449
900300	-403949	334694	900300	-439923	331102	900500	-233976	328454	900300	-399431	329875	900100	-306198	319909	899900	-281536	324653
920100	-394663	334.95	920000	-442347	331754	920400	-230153	328.55	920200	-39104	329959	919900	-299502	320021	919700	-280319	324786
940100	-383858	335029	945500	-442124	331.82	943100	-229601	328.6	940300	-384974	330078	939900	-295414	319978	939700	-278337	325053
962500	-381708	335337	964800	-434503	331892	962400	-224108	328963	962300	-375274	329843	964200	-287768	319647	966700	-277681	325298
##### Extended Information
[Comments]
Sample name	DSAA1_1
Comment	x
User
Division
Company	U of Washington
[Detailed Information]
Creation date	1/2/2023 1:47 PM
Data array type	Non-linear data array * 2
Horizontal axis	Temperature [C]
Vertical axis(1)	CD [mdeg]
Vertical axis(2)	HT [V]
Start	3.92 C
End	96.25 C
Data points	47
[Measurement Information]
Instrument name	J1500
Model name	J-1500
Serial No.	B044061638
Detector	PM-539
Detector S/N	B044061638
Lock-in amp.	X mode
HT volt	Auto
Accessory	MPTC-513
Accessory S/N	A005061647
Cell	1
Control sensor	Holder
Monitor sensor	Holder
Start Mode	Keep target temperature +/-0.10 deg C while 5 seconds
Measurement date	1/2/2023 1:47 PM
Photometric mode	CD	HT
CD scale	2000 mdeg/1.0 dOD
FL scale	200 mdeg/1.0 dOD
D.I.T.	2 sec
Bandwidth	1.00 nm
Monitor wavelength	222 nm
Baseline correction	None
Shutter control	Auto
No. of cycle	1

## Sheet: Extended Data Fig. 7 CDscan
CD[mdeg] wavelength scan at different temperatures
DSAA1_1											2DT2											DAm12											DAm14											DAm15
wavelength[nm]	2.34	14	24.01	34.01	44.01	54.01	64.01	74.01	84.01	94.02	wavelength[nm]	4.21	14	24.01	34.01	44	54.01	63.99	74	84.01	94	wavelength[nm]	2.35	14	24	34.01	44	54	64	74	84	94	wavelength[nm]	4	13.99	24	34	44	54.01	64	73.99	84	93.99	wavelength[nm]	3.99	14	24	34.02	44
260	-0.25187	-0.132561	-0.0950427	-0.0909901	-0.517499	-0.149855	-0.395454	-0.288801	-0.239174	-0.188332	260	0.455075	0.170336	0.222109	0.0819611	-0.0700822	-0.0114488	0.124845	-0.0897058	0.0350663	0.291976	260	-0.0128457	-0.13757	0.0174959	-0.0550688	-0.030334	0.0423274	-0.235744	0.254252	0.0530551	0.0798071	260	0.32452	0.265286	0.115946	0.197593	0.0881611	0.249729	0.500169	0.22165	0.0276549	-0.0809877	260	0.136027	0.0662685	0.310831	0.0844204	-0.0407617
259	-0.297187	-0.365463	-0.317786	-0.372938	-0.447882	-0.325684	-0.0658219	-0.518826	-0.212405	-0.238806	259	0.471663	0.195913	0.119635	0.29147	0.188991	0.00373197	-0.125475	0.0168289	0.0405207	0.118159	259	-0.0413111	-0.314044	0.123303	-0.332044	-0.346223	-0.314257	-0.10103	0.0618332	0.194634	0.0611617	259	0.198455	0.177484	0.177968	0.250137	0.048394	0.491756	0.376379	0.540093	0.20107	0.065517	259	0.187169	0.000701066	-0.0480498	-0.0248631	0.184118
258	-0.170081	-0.505732	-0.230148	-0.295839	-0.195859	-0.412711	-0.248731	-0.54459	-0.361348	-0.360405	258	0.0231179	0.311502	0.0204434	0.309128	0.216509	0.0998639	-0.0790524	0.068813	-0.099244	-0.1268	258	-0.119049	-0.511717	-0.100562	-0.115763	-0.318792	-0.21915	-0.0099451	0.18442	0.231729	0.0277638	258	0.012103	0.236695	0.0215875	0.196818	0.172756	0.528162	0.244911	0.519393	-0.0261142	0.106457	258	0.135293	0.090924	0.0390586	0.22087	-0.0881122
257	-0.211513	-0.261491	-0.31257	-0.360955	-0.168633	-0.465478	-0.69966	-0.517349	-0.415893	-0.381668	257	0.0474534	0.296456	0.0256122	0.043283	0.0988861	0.127275	0.00439635	0.0508309	0.0683283	0.0494685	257	0.0884379	-0.324127	-0.0299815	-0.104974	-0.00480535	0.18464	-0.0611043	0.110158	-0.180308	0.109844	257	-0.164152	0.0882753	0.0147118	0.00722738	0.124884	0.204974	0.24411	0.288761	0.281122	0.226877	257	0.00450036	0.122093	0.141659	0.127202	0.211297
256	-0.352658	-0.139724	-0.194164	-0.322578	-0.189907	-0.405488	-0.301724	-0.217149	-0.274888	-0.466079	256	0.391096	0.410001	-0.0137789	-0.00969298	-0.0415534	0.115593	-0.011896	0.270431	0.060544	0.0446965	256	-0.00814367	-0.022414	-0.0442958	-0.250169	-0.167862	-0.0182738	-0.241279	0.189257	-0.13038	0.249619	256	-0.0607552	-0.0228625	-0.0806676	0.127846	0.158539	0.0404318	0.136562	-0.174722	0.460456	0.249838	256	0.137888	0.281944	0.179213	0.139797	0.296922
255	-0.215675	-0.295693	-0.447959	-0.125487	-0.378839	-0.460654	-0.159489	-0.29997	-0.37118	-0.437315	255	0.407806	0.366186	0.0998844	0.146916	0.0666029	0.125649	0.17518	0.187166	-0.115549	0.037327	255	-0.283795	-0.0111213	-0.239739	-0.223777	-0.31905	-0.0895129	0.225133	0.263433	-0.176353	0.0479665	255	0.0182495	0.167349	0.104288	0.288396	0.148028	0.170571	0.151161	0.00989814	0.184747	-0.0829048	255	-0.0134385	0.15619	0.42012	-0.126324	0.304978
254	-0.424686	-0.203699	-0.557223	-0.248724	-0.454938	-0.23689	-0.231545	-0.502083	-0.332048	-0.52276	254	0.177606	0.163195	0.262482	0.123856	0.071893	-0.136448	0.180783	0.195281	-0.021538	-0.169477	254	-0.154932	-0.135668	-0.0381987	-0.0255594	-0.212521	-0.159907	0.16561	-0.0777305	-0.149714	-0.151183	254	0.204624	-0.0753187	0.0294261	-0.139708	0.197278	0.235118	0.00898534	0.245222	0.0425685	-0.136809	254	0.0706799	0.166666	0.0778631	-0.241593	0.154685
253	-0.108661	-0.139939	-0.363731	-0.334342	-0.458023	-0.0441422	-0.244474	-0.419815	-0.223995	-0.698524	253	0.245632	0.229377	0.229438	0.315875	0.103075	0.124993	0.042857	0.0748059	-0.148991	-0.197336	253	0.242195	-0.194513	-0.137181	-0.0127363	-0.286029	0.00298536	0.179515	-0.0914429	-0.139914	-0.0747597	253	0.299909	-0.0843838	-0.0126868	-0.294464	-0.144649	0.0573252	0.210322	0.287358	-0.0541079	0.108373	253	0.136261	0.0483537	0.00920002	0.103226	0.199576
252	-0.273844	-0.127269	-0.281426	-0.314757	-0.537261	-0.383907	-0.419349	-0.641792	-0.427499	-0.716681	252	0.193298	0.232804	0.150581	0.257754	-0.14335	-0.110164	0.00299545	-0.0537037	-0.173123	-0.0779695	252	0.0740995	-0.282823	-0.283463	0.0438311	-0.31545	-0.077211	-0.0303629	-0.0658328	-0.132907	-0.154676	252	0.0737346	-0.174556	0.00354357	-0.1458	0.0936219	-0.16391	0.273386	-0.00783352	0.131684	0.0613416	252	-0.137033	0.185648	-0.0161031	-0.0906707	-0.0164152
251	-0.401981	-0.179688	-0.225488	-0.39007	-0.751812	-0.574966	-0.275514	-0.393893	-0.575531	-0.745469	251	-0.209695	0.0428436	0.067262	0.0433742	-0.196023	-0.110734	-0.189011	-0.10174	-0.404472	-0.0717862	251	-0.197661	-0.38059	-0.203555	-0.292708	-0.272416	-0.274519	-0.227758	-0.129512	-0.196228	-0.199996	251	0.063104	-0.0567479	-0.0261006	-0.149635	-0.365731	-0.119597	0.120914	-0.365399	-0.160856	0.169159	251	-0.129363	0.043283	0.223642	-0.0133685	-0.0737036
250	-0.0434484	-0.270114	-0.535521	-0.340132	-0.454359	-0.436656	-0.666749	-0.625184	-0.438776	-0.978257	250	-0.126782	-0.113701	-0.27626	0.0742578	-0.16501	-0.0374058	-0.254922	-0.423503	-0.254887	-0.370006	250	-0.179787	-0.28593	-0.0655839	-0.190306	-0.475879	-0.312226	-0.406828	-0.105784	-0.250228	-0.278116	250	0.0191241	-0.0962721	-0.160487	-0.396565	-0.232302	0.0471913	-0.313303	-0.450216	-0.00466286	-0.110855	250	0.172741	0.0730498	0.0557259	-0.0173003	-0.0321663
249	-0.169726	0.0863162	-0.539994	-0.569556	-0.540114	-0.574101	-106585	-0.719696	-0.654268	-0.950119	249	0.00665983	-0.174969	-0.485263	-0.488371	-0.0723704	-0.310293	-0.221966	-0.600633	-0.493243	-0.514252	249	-0.218629	-0.293876	-0.246688	-0.505107	-0.522126	-0.630921	-0.637285	-0.463556	-0.177779	-0.340874	249	-0.0193204	-0.20179	-0.0807667	-0.377972	-0.581003	-0.303758	-0.391349	-0.605921	-0.242728	-0.458349	249	0.0954287	-0.107052	-0.309907	-0.259671	-0.0360315
248	-0.407664	-0.13232	-0.59368	-0.599767	-0.739002	-0.879642	-125211	-102031	-109948	-102893	248	0.0773671	-0.0946029	-0.65358	-0.482353	-0.425153	-0.426149	-0.583493	-0.619857	-0.686462	-11031	248	-0.12019	-0.502982	-0.385848	-0.694474	-0.559958	-0.523211	-0.571554	-0.6146	-0.300424	-0.292111	248	-0.349895	-0.349933	-0.342647	-0.213127	-0.646551	-0.669148	-0.530064	-0.598932	-0.679427	-0.386275	248	-0.0541969	-0.58089	-0.435768	-0.3216	-0.302306
247	-0.699139	-0.675737	-0.59236	-0.840408	-105449	-100534	-121517	-128783	-153981	-110478	247	-0.0877792	-0.418353	-0.558506	-0.450083	-0.612552	-0.830859	-0.714823	-0.944378	-125555	-0.989399	247	-0.381142	-0.542044	-0.446917	-0.513685	-0.591478	-0.640581	-0.648686	-0.884319	-0.633105	-0.858817	247	-0.590167	-0.677664	-0.525805	-0.716697	-0.706312	-0.456682	-0.929543	-0.739371	-0.873813	-0.767537	247	-0.27042	-0.697293	-0.250177	-0.534284	-0.4008
246	-0.693347	-0.661081	-0.770582	-0.975313	-121243	-123493	-111184	-132698	-15332	-159133	246	-0.443737	-0.743919	-0.744704	-0.730767	-0.875041	-11928	-114898	-126002	-145237	-141036	246	-0.66724	-0.778215	-0.806647	-0.950393	-0.744515	-0.97511	-0.675773	-0.975313	-122397	-0.990606	246	-0.82356	-0.866295	-0.779143	-100018	-110157	-0.711687	-108251	-103805	-118604	-118233	246	-0.51447	-0.573029	-0.658846	-0.731086	-0.827466
245	-0.795738	-0.81652	-111628	-107317	-148687	-150371	-178693	-167593	-179711	-200892	245	-0.738521	-102139	-104402	-126093	-140933	-159191	-159701	-179176	-16813	-209679	245	-0.99335	-119503	-117591	-109003	-111929	-124769	-111995	-0.918405	-147747	-117004	245	-112702	-114389	-127569	-111395	-14419	-129862	-130359	-141278	-129451	-154398	245	-0.704627	-100766	-0.830547	-118365	-0.962778
244	-102139	-122618	-153074	-162651	-172651	-186351	-197668	-208491	-230683	-24864	244	-143608	-167352	-155631	-168123	-1919	-22605	-231462	-231503	-227914	-27433	244	-110897	-12929	-146142	-133377	-122565	-14298	-148397	-134711	-153628	-159773	244	-154779	-157359	-159513	-163367	-183351	-190695	-19229	-202477	-19627	-181212	244	-109029	-137559	-109573	-142742	-160857
243	-131113	-182367	-18035	-21333	-225285	-244761	-238794	-288389	-295907	-284905	243	-195664	-235892	-226701	-240649	-241925	-297212	-289147	-293555	-296912	-324132	243	-134633	-171254	-17018	-160372	-160033	-177225	-195512	-17247	-19255	-189992	243	-207228	-197705	-238606	-24348	-246281	-249529	-280701	-276804	-280095	-264268	243	-149668	-196464	-180233	-156379	-225497
242	-178445	-250878	-22562	-273898	-303769	-285366	-331993	-320858	-360902	-373064	242	-260765	-311029	-28247	-306649	-318373	-355908	-347093	-401663	-378837	-399826	242	-185206	-207215	-215174	-219903	-201301	-23581	-236229	-206684	-242262	-232194	242	-261809	-285699	-337449	-321816	-320921	-346345	-372637	-352676	-365728	-353199	242	-21441	-257806	-256221	-235871	-253827
241	-283074	-291858	-306701	-339536	-379628	-363498	-39774	-415882	-446674	-44279	241	-369831	-396215	-410023	-411751	-420836	-460531	-484691	-499944	-510676	-496879	241	-258915	-272191	-272787	-264054	-290143	-294103	-312571	-278477	-271194	-29173	241	-376498	-396227	-426524	-411508	-407081	-424909	-462153	-447963	-478563	-470093	241	-263404	-310245	-334131	-340044	-315021
240	-376636	-402852	-400603	-401956	-436174	-45529	-487293	-544371	-523352	-561932	240	-479799	-493814	-494453	-54783	-570908	-578561	-603525	-619484	-62542	-611304	240	-292709	-339131	-346808	-362721	-363619	-34832	-404288	-376426	-360363	-347728	240	-488451	-488027	-514478	-547532	-53489	-532771	-567964	-563855	-580235	-585389	240	-341098	-369635	-38814	-418068	-414971
239	-49929	-504093	-526198	-555031	-563658	-583152	-613465	-644021	-643396	-700853	239	-656571	-661816	-665945	-696522	-736118	-741761	-755664	-791641	-776627	-78451	239	-363812	-410011	-457695	-442585	-442198	-452089	-450971	-479975	-448746	-428339	239	-657873	-641062	-657053	-719189	-699255	-683722	-713544	-72141	-761964	-73214	239	-457232	-500269	-504333	-494805	-554749
238	-588549	-61822	-653927	-659833	-722887	-725903	-756875	-762805	-77838	-834384	238	-798003	-830224	-837684	-853185	-910954	-922642	-920237	-939403	-91258	-918724	238	-495102	-496487	-571201	-526661	-531365	-544463	-535339	-562825	-541394	-547477	238	-817763	-844159	-801629	-882951	-856122	-875221	-863486	-898156	-878304	-845922	238	-574145	-653992	-633771	-638361	-679602
237	-727092	-779419	-836845	-805322	-873023	-872215	-907268	-915038	-939969	-949031	237	-102069	-103165	-107445	-106827	-110219	-111487	-113085	-109868	-109021	-108699	237	-61879	-613641	-660938	-659984	-656162	-668254	-645371	-703461	-663633	-660103	237	-101143	-105813	-106362	-107748	-110497	-107535	-10635	-108939	-106911	-102477	237	-753497	-796982	-783895	-808302	-813445
236	-910953	-993616	-101595	-105554	-104697	-108118	-109462	-108374	-113711	-113729	236	-125437	-127291	-12742	-128953	-130238	-13211	-133348	-132534	-130752	-129938	236	-717668	-729069	-770402	-775866	-81171	-766988	-802021	-816019	-781898	-767333	236	-124781	-12789	-129222	-129356	-132784	-130349	-127236	-128996	-126422	-124996	236	-937429	-957608	-953764	-967138	-982152
235	-118457	-123427	-12583	-124848	-127187	-126247	-129001	-129592	-131934	-130036	235	-153539	-153549	-155853	-154365	-156452	-158564	-160829	-158905	-154177	-154241	235	-891895	-900309	-897421	-910223	-952219	-930574	-965996	-959402	-934419	-902051	235	-156071	-155372	-156461	-157216	-155891	-155156	-155298	-152758	-151534	-143991	235	-112057	-114911	-114373	-116682	-116937
234	-144677	-145727	-149148	-147107	-151023	-150865	-149672	-152256	-149288	-14827	234	-183331	-181658	-184483	-179893	-183524	-185489	-185738	-183408	-178995	-178456	234	-103466	-10763	-102836	-103009	-108678	-110174	-111126	-111151	-107947	-102988	234	-18.43	-184616	-184302	-183756	-183425	-18078	-18075	-176135	-176343	-16332	234	-131961	-135209	-133172	-136818	-136637
233	-173107	-175304	-175999	-177559	-177478	-176615	-176989	-177626	-174761	-170061	233	-215884	-213994	-213452	-212807	-215852	-21133	-211508	-21118	-204261	-206455	233	-119094	-123422	-123441	-123434	-124505	-124597	-128704	-126095	-122945	-115177	233	-219572	-219763	-213563	-215278	-21403	-210299	-209319	-205757	-201788	-18837	233	-157409	-158372	-155612	-157289	-163565
232	-20812	-206866	-20572	-208277	-20692	-201429	-205428	-204364	-198842	-193929	232	-24.64	-24895	-247792	-245551	-244281	-240823	-242543	-237966	-230197	-231588	232	-138283	-138169	-141969	-143974	-139645	-142515	-145196	-142739	-137879	-12906	232	-25464	-250284	-249062	-245284	-243727	-24023	-237062	-234076	-227226	-214305	232	-180352	-182205	-182312	-181255	-183863
231	-236749	-235399	-237722	-23368	-237482	-228455	-228677	-227718	-221061	-213585	231	-28042	-281127	-279992	-276098	-27296	-270768	-267954	-263752	-256044	-253427	231	-156276	-154674	-158337	-154633	-157621	-15778	-160023	-157624	-150481	-143501	231	-283599	-283641	-282658	-279222	-268882	-267675	-262608	-259156	-248979	-23495	231	-204384	-206188	-201631	-203018	-200962
230	-27175	-273784	-274801	-268756	-268011	-26089	-261338	-256347	-249695	-241296	230	-318283	-31904	-316338	-312377	-306737	-30375	-298602	-292925	-283848	-28196	230	-174137	-17626	-173525	-171306	-176969	-177139	-176272	-175486	-168551	-158949	230	-327853	-323781	-316363	-308601	-303578	-297586	-29358	-288988	-277493	-259763	230	-232001	-233427	-229166	-22734	-227445
229	-306943	-308688	-305404	-298832	-29883	-293603	-288794	-28294	-27.59	-262545	229	-357173	-358147	-352034	-346484	-337412	-337479	-33.08	-32125	-310308	-308962	229	-192695	-195269	-191486	-187946	-189984	-194509	-192328	-189663	-18416	-172555	229	-365921	-356417	-351471	-339604	-337449	-329272	-326178	-317937	-305994	-286485	229	-25647	-254196	-253519	-251463	-251025
228	-345054	-340453	-33907	-328662	-329033	-320432	-314031	-307713	-298699	-284322	228	-391535	-394232	-385153	-377783	-371778	-361195	-356746	-349343	-338151	-33115	228	-210619	-206412	-208704	-205332	-20478	-20881	-205077	-205053	-199126	-181597	228	-396399	-388126	-378701	-37456	-363612	-353444	-351494	-339901	-328014	-306641	228	-278771	-273675	-273696	-273204	-270658
227	-383214	-373736	-370672	-365817	-358703	-349855	-344378	-336491	-325267	-309862	227	-42986	-427997	-416036	-411975	-402242	-390261	-384351	-37584	-362269	-355786	227	-226124	-222962	-222893	-223618	-219759	-224112	-22281	-219112	-20888	-192863	227	-428453	-42015	-406291	-400726	-392893	-382334	-376089	-361635	-350428	-324586	227	-302697	-299344	-293075	-293854	-28.88
226	-411134	-40501	-402895	-399738	-384922	-376911	-366285	-359188	-349379	-329683	226	-460663	-453952	-449108	-439507	-42988	-416614	-407264	-397263	-382636	-377281	226	-241484	-236844	-233332	-231875	-230799	-237737	-235968	-228809	-220364	-201688	226	-452135	-444417	-424907	-42344	-418808	-400694	-396327	-381686	-368444	-343355	226	-320135	-319019	-31272	-308165	-308177
225	-435813	-434628	-428176	-421534	-406013	-399776	-387367	-377764	-367074	-344085	225	-490438	-480578	-475546	-463809	-451735	-441959	-428971	-414262	-404868	-393413	225	-249566	-245192	-242911	-23856	-240261	-242672	-244643	-237841	-227716	-211643	225	-473249	-466302	-445007	-439374	-431938	-419222	-409623	-401568	-38531	-356887	225	-334567	-331244	-32591	-321187	-321032
224	-461145	-459193	-449507	-444588	-428158	-420634	-40736	-39753	-390215	-363693	224	-516021	-505079	-495681	-48382	-473315	-45861	-450431	-431756	-420294	-41145	224	-252621	-253601	-249841	-243862	-249085	-250866	-249487	-246926	-236172	-217193	224	-490431	-480971	-46243	-453803	-441599	-43213	-419561	-415207	-397397	-366981	224	-346299	-341175	-332133	-33246	-327068
223	-481397	-479648	-468203	-463321	-447255	-440891	-424631	-410713	-40633	-37618	223	-53375	-523501	-513964	-503299	-490488	-475975	-462458	-446724	-437115	-423105	223	-256858	-254922	-255609	-248932	-252143	-254586	-257237	-255869	-239099	-221758	223	-500763	-493341	-473948	-463423	-448646	-443016	-43434	-418008	-405799	-374525	223	-352542	-350241	-342428	-338555	-335128
222	-499559	-494889	-483307	-478166	-464261	-453009	-437824	-426389	-413611	-385505	222	-552436	-541111	-528268	-518386	-50495	-489894	-475163	-464648	-448199	-431887	222	-260628	-258504	-258919	-253129	-254072	-258862	-263807	-25726	-24513	-227685	222	-507845	-495402	-483648	-467066	-453599	-446751	-435636	-426886	-412275	-382406	222	-355178	-351695	-347063	-345399	-338944
221	-516497	-500126	-492946	-48875	-474295	-459879	-447718	-439667	-422312	-392774	221	-569406	-553443	-537322	-530661	-517218	-496123	-484157	-472176	-458278	-444071	221	-257187	-25927	-254629	-250402	-254294	-259941	-263772	-25796	-245917	-230173	221	-515447	-49988	-483233	-473105	-459335	-452823	-446065	-429946	-413575	-381996	221	-35979	-357241	-35309	-345316	-341948
220	-520934	-512323	-500428	-491579	-483023	-466181	-45778	-442708	-429668	-399925	220	-574948	-559923	-546636	-536453	-523649	-509941	-492521	-478296	-465406	-453139	220	-253939	-252494	-252956	-249083	-249151	-259549	-265136	-25584	-242899	-225948	220	-505482	-498341	-481846	-473335	-457328	-454379	-449007	-429758	-41207	-381431	220	-357055	-354682	-352901	-345927	-345018
219	-523736	-514444	-507522	-494807	-488007	-468851	-463477	-450597	-431836	-406461	219	-576459	-56478	-550696	-546495	-528819	-512035	-502335	-490029	-469269	-458336	219	-253405	-245302	-251212	-247501	-250075	-260263	-260124	-252181	-249836	-224666	219	-501572	-49264	-475437	-463915	-455287	-450781	-445518	-433002	-419923	-383973	219	-354751	-35404	-350057	-341516	-343009
218	-526443	-511592	-506211	-496546	-487357	-472845	-463784	-457128	-437872	-407576	218	-582921	-563156	-556682	-551666	-532118	-516371	-507702	-491383	-473133	-460996	218	-244813	-240449	-246929	-240712	-250322	-257076	-257855	-254574	-250153	-23006	218	-504726	-48778	-474712	-463703	-457037	-451124	-44298	-434837	-420727	-390908	218	-35261	-349474	-345256	-33773	-338316
217	-523747	-514167	-506973	-494743	-487658	-476508	-463285	-455122	-440379	-407736	217	-583553	-570337	-561272	-54579	-527211	-524632	-50961	-494898	-475687	-470148	217	-239683	-241823	-239797	-24393	-247239	-256165	-255515	-257308	-243981	-230835	217	-497252	-482997	-472856	-46402	-455446	-444664	-438838	-432159	-418663	-389884	217	-348763	-34451	-34.39	-335129	-335099
216	-519627	-515241	-499298	-49504	-484687	-469874	-464906	-456069	-439805	-413004	216	-585642	-572789	-56162	-546935	-530551	-523182	-508563	-495071	-479452	-471747	216	-238271	-240437	-236749	-241295	-245132	-250823	-251433	-255057	-241948	-234496	216	-489463	-481543	-471858	-454731	-452667	-446021	-44167	-42701	-419879	-389818	216	-344236	-344624	-34118	-333187	-339006
215	-515023	-512877	-497284	-490076	-478466	-472974	-461145	-453713	-44455	-40951	215	-577952	-570576	-558191	-542794	-534361	-51668	-499838	-493361	-480559	-473363	215	-237385	-23478	-234937	-235961	-239051	-241872	-248296	-25089	-239919	-231165	215	-487333	-477468	-471271	-45636	-454889	-449168	-442178	-431483	-420679	-394255	215	-341058	-346187	-343555	-33454	-337403
214	-506739	-503175	-497585	-480809	-474825	-471051	-459767	-452726	-444911	-408342	214	-567765	-566664	-551857	-544484	-537865	-518731	-502678	-494933	-485442	-474936	214	-237489	-228948	-228588	-235719	-240529	-243774	-247881	-246988	-239009	-227392	214	-489678	-47851	-468127	-460385	-459005	-452197	-443899	-436718	-43105	-399368	214	-342604	-341279	-344094	-335795	-331959
213	-500879	-498351	-495614	-48.73	-480938	-468029	-458307	-449643	-436602	-40848	213	-573907	-563025	-547291	-538738	-545316	-529032	-515405	-494543	-488271	-476564	213	-235517	-233879	-231349	-237929	-24.06	-251315	-254847	-25.19	-251789	-231576	213	-492264	-491176	-477117	-46603	-46664	-458251	-455102	-447693	-433645	-40165	213	-343409	-341239	-348175	-337893	-334435
212	-496527	-491914	-492108	-48845	-47249	-468769	-457862	-44951	-440164	-410128	212	-572195	-56706	-554602	-543327	-541628	-52216	-517802	-499957	-485341	-48673	212	-238216	-236465	-239555	-244831	-241261	-256914	-261053	-25244	-254817	-237833	212	-500234	-492723	-482544	-484364	-476353	-471083	-465447	-455267	-449264	-418209	212	-349594	-353365	-351181	-340248	-348921
211	-496662	-494504	-488454	-48452	-475869	-467498	-460338	-45646	-440873	-413718	211	-570532	-567171	-562464	-551148	-542836	-522934	-515999	-505866	-49154	-489854	211	-237173	-235009	-235949	-239544	-251439	-264317	-259338	-265819	-245451	-240139	211	-513723	-502452	-496288	-494922	-485364	-482363	-476801	-471849	-459605	-439008	211	-362167	-366714	-357204	-352625	-359908
210	-492672	-501206	-487228	-484878	-48276	-47.98	-462983	-45929	-447453	-417118	210	-576596	-569823	-567871	-554572	-548603	-532954	-525638	-515888	-495584	-49275	210	-244589	-246869	-240791	-237515	-258181	-260451	-271175	-270026	-253396	-254087	210	-526629	-518043	-510319	-508884	-501496	-501134	-496151	-493892	-466927	-449855	210	-373284	-37504	-371388	-365515	-367333
209	-489552	-496084	-481814	-47636	-472425	-480924	-463536	-45705	-449671	-423138	209	-574445	-57438	-561686	-553534	-53925	-529584	-528185	-516762	-489721	-488139	209	-250855	-254992	-24075	-238608	-260382	-266206	-281226	-27.57	-265051	-258119	209	-541441	-531127	-51718	-525516	-513839	-515896	-511686	-500416	-485712	-463076	209	-384047	-378362	-381228	-373856	-380579
208	-475577	-479151	-471076	-463391	-461197	-461676	-44932	-440336	-428944	-42511	208	-565731	-552947	-549847	-539215	-52632	-516278	-513236	-506784	-473156	-475787	208	-239852	-251733	-244428	-244939	-257049	-258567	-273326	-28.18	-274666	-261966	208	-539031	-533879	-51168	-528079	-51.52	-513438	-508719	-500975	-494099	-464864	208	-392354	-384201	-380609	-373964	-384826
207	-448539	-434792	-448819	-434706	-438019	-427157	-408865	-407496	-403486	-390364	207	-532091	-51522	-518287	-497342	-494427	-483313	-475859	-451039	-442426	-43332	207	-228297	-22163	-241093	-242966	-239805	-242209	-250778	-25725	-248332	-230897	207	-515961	-518465	-507404	-498636	-497947	-488441	-482179	-482286	-466616	-44377	207	-377655	-370211	-361984	-364412	-357852
206	-389445	-390803	-395307	-389564	-388715	-377577	-362545	-356226	-370033	-335242	206	-472094	-440847	-453561	-432275	-431925	-415536	-418572	-396516	-387234	-365934	206	-216473	-20151	-201706	-215292	-198036	-222484	-230962	-227248	-193187	-205713	206	-478038	-473155	-474736	-457311	-450376	-443531	-44128	-441313	-439581	-407651	206	-34393	-336562	-331081	-330021	-317209
205	-287488	-309333	-309025	-279161	-301384	-298501	-27092	-274827	-258997	-277751	205	-363878	-326986	-344095	-33137	-32831	-332575	-307454	-303339	-278014	-282358	205	-170629	-165656	-153318	-16217	-155867	-183687	-167391	-174316	-169045	-174314	205	-410577	-385876	-391392	-393182	-373526	-364732	-365771	-36183	-36917	-34398	205	-277657	-266854	-258228	-257659	-247039
204	-207444	-204085	-215215	-187438	-201383	-220342	-19.19	-187133	-196209	-225051	204	-230901	-224943	-233226	-230419	-19786	-216112	-200571	-205765	-171163	-182952	204	-118695	-107597	-116731	-117718	-105909	-135239	-113961	-15152	-13265	-150853	204	-32625	-316227	-294256	-30.71	-301688	-290772	-291365	-282351	-273132	-277119	204	-21144	-210325	-187917	-204304	-190683
203	-659531	-71087	-938993	-733775	-897091	-754804	-110263	-113166	-843098	-136629	203	-790372	-650937	-891727	-689475	-611085	-846201	-650419	-728502	-668799	-797604	203	-617857	-554597	-384981	-242554	-576928	-813213	-607193	-842724	-732698	-10537	203	-206085	-201685	-20322	-215279	-219988	-188763	-187118	-179112	-173381	-181716	203	-127913	-129969	-907189	-119901	-104905
202	636782	562445	382598	298004	0.801299	290541	-0.19112	495299	106713	-359383	202	792409	814864	442007	692549	58301	838356	911729	780242	-0.00920446	625021	202	276478	-157391	168123	0.973429	0.322441	-135615	-0.730059	-470521	142911	815829	202	-859923	-742329	-104026	-132598	-906636	-851777	-71697	-531145	-670161	-101185	202	-498689	-294641	-23893	-138111	-336519
201	205034	195776	208983	169394	204731	15.05	116804	174691	374697	198652	201	231633	261833	241328	256325	247397	258109	231095	235987	931362	204146	201	106183	711647	961457	114672	81024	107514	755844	869338	183898	265426	201	222295	581959	31256	233085	825752	384091	600541	930199	0.846269	476188	201	644155	891405	797852	972794	946964
200	378888	339285	36249	406602	347838	340347	275377	420104	500576	487066	200	439238	470876	426789	404672	397492	43511	42114	37948	411399	633858	200	174615	164203	151549	169334	166931	22637	225306	230318	288092	239446	200	161547	186702	178733	171797	190504	184979	222133	24453	174283	175826	200	200061	20848	201537	227176	22348
[truncated: 16 more columns]

## Sheet: Extended Data Fig. 7 SECtraces
SEC traces abs 230 binders
DSAA1_1	uv 230	vol 230	2DT2	uv 230	vol 230	DTTR23	uv 230	vol 230	DAm12	uv 230	vol 230	DAm14	uv 230	vol 230	DAm15	uv 230	vol 230
0	2.02e-05	8.0033	0	0	8.00336	0	0.003097	8.00603	0	0.012412	8.00661	0	0.000479	8.00129	0	0.000907	8.00268
1	2.3e-05	8.00994	1	3.69e-05	8.01	1	0.003118	8.01267	1	0.012886	8.01325	1	0.000462	8.008	1	0.00111	8.00944
2	2.65e-05	8.0168	2	7.96e-05	8.01664	2	0.003158	8.0193	2	0.012856	8.01989	2	0.000516	8.01463	2	0.001352	8.01607
3	2.27e-05	8.02344	3	0.000136	8.02327	3	0.003204	8.02594	3	0.012712	8.02652	3	0.00058	8.02127	3	0.001566	8.02271
4	1.82e-05	8.03007	4	0.000198	8.03012	4	0.003235	8.0309	4	0.012551	8.03317	4	0.000625	8.02791	4	0.001691	8.02935
5	1.57e-05	8.03321	5	0.000247	8.03237	5	0.003278	8.03298	5	0.012325	8.03981	5	0.000675	8.03455	5	0.0018	8.03599
6	9.39e-06	8.03542	6	0.000294	8.03474	6	0.003326	8.03589	6	0.011705	8.04644	6	0.000706	8.04119	6	0.001808	8.04262
7	1.25e-05	8.03903	7	0.000346	8.0387	7	0.003377	8.04077	7	0.011154	8.05332	7	0.000732	8.04782	7	0.001777	8.04926
8	2.13e-05	8.04436	8	0.000409	8.04439	8	0.003416	8.04704	8	0.010247	8.05996	8	0.000791	8.05461	8	0.001706	8.05599
9	1.87e-05	8.05094	9	0.000463	8.05102	9	0.003449	8.05368	9	0.00924	8.06659	9	0.000862	8.06133	9	0.001644	8.06277
10	1.41e-05	8.05757	10	0.000512	8.05766	10	0.003477	8.06032	10	0.008877	8.07323	10	0.000907	8.06797	10	0.001616	8.06941
11	1.11e-05	8.0642	11	0.000558	8.0643	11	0.003526	8.06696	11	0.008526	8.07987	11	0.000933	8.07461	11	0.001605	8.07605
12	9.91e-06	8.07108	12	0.000598	8.07094	12	0.003579	8.07358	12	0.008217	8.08651	12	0.000953	8.08124	12	0.00149	8.08268
13	1.23e-05	8.07771	13	0.000633	8.07758	13	0.003623	8.08022	13	0.008204	8.09314	13	0.000946	8.08788	13	0.001332	8.08932
14	1.43e-05	8.08435	14	0.000674	8.08444	14	0.003667	8.08686	14	0.008261	8.09978	14	0.000933	8.09451	14	0.001257	8.09596
15	1.33e-05	8.09099	15	0.000725	8.09107	15	0.003689	8.09371	15	0.009113	8.10665	15	0.000904	8.10115	15	0.001227	8.10259
16	1.37e-05	8.09763	16	0.000746	8.09771	16	0.003712	8.10037	16	0.009852	8.11328	16	0.000873	8.10792	16	0.00124	8.10931
17	1.53e-05	8.10427	17	0.000782	8.10435	17	0.003737	8.107	17	0.009575	8.11992	17	0.000805	8.11466	17	0.001208	8.11609
18	1.27e-05	8.11091	18	0.000819	8.11099	18	0.003773	8.11364	18	0.009229	8.12656	18	0.000728	8.12129	18	0.001156	8.12273
19	1.18e-05	8.11754	19	0.00087	8.11763	19	0.003831	8.12028	19	0.00945	8.13319	19	0.000711	8.12793	19	0.001119	8.12937
20	1.59e-05	8.1244	20	0.000935	8.12426	20	0.003897	8.12691	20	0.009878	8.13984	20	0.000713	8.13457	20	0.001043	8.136
21	1.91e-05	8.13104	21	0.001012	8.1309	21	0.00397	8.13355	21	0.010791	8.14648	21	0.0007	8.14122	21	0.000938	8.14263
22	2.13e-05	8.13767	22	0.001098	8.13777	22	0.004018	8.14018	22	0.011659	8.15311	22	0.000682	8.14786	22	0.000897	8.14926
23	2.37e-05	8.14431	23	0.001182	8.14441	23	0.004085	8.14704	23	0.011619	8.15998	23	0.000647	8.15449	23	0.000936	8.1559
24	2.52e-05	8.15095	24	0.001264	8.15104	24	0.004165	8.15369	24	0.011386	8.16478	24	0.000586	8.16126	24	0.00094	8.16262
25	2.49e-05	8.1576	25	0.001348	8.15768	25	0.004254	8.16032	25	0.0107	8.16478	25	0.000542	8.16483	25	0.000913	8.16491
26	2.52e-05	8.16424	26	0.001462	8.16432	26	0.004342	8.16696	26	0.010129	8.16478	26	0.000512	8.16483	26	0.000919	8.16491
27	1.79e-05	8.17088	27	0.001569	8.17096	27	0.004432	8.1736	27	0.010643	8.16527	27	0.000526	8.16483	27	0.001131	8.16494
28	1.21e-05	8.17775	28	0.001676	8.17759	28	0.004521	8.18025	28	0.011394	8.16743	28	0.000562	8.16562	28	0.001345	8.16606
29	1.38e-05	8.18439	29	0.001781	8.18423	29	0.004592	8.18689	29	0.011421	8.17132	29	0.000551	8.16812	29	0.001467	8.16891
30	1.62e-05	8.19102	30	0.001877	8.19109	30	0.004646	8.19352	30	0.011342	8.17356	30	0.000532	8.17235	30	0.001581	8.17349
31	1.11e-05	8.19766	31	0.001969	8.19773	31	0.004694	8.20037	31	0.011511	8.17358	31	0.000528	8.17361	31	0.001728	8.17369
32	5.89e-06	8.2043	32	0.002061	8.20436	32	0.004757	8.20703	32	0.011847	8.17471	32	0.000541	8.17371	32	0.001878	8.17396
33	2.1e-06	8.21093	33	0.002154	8.21101	33	0.004816	8.21367	33	0.012866	8.17756	33	0.000595	8.17518	33	0.001973	8.17577
34	0	8.21757	34	0.002255	8.21764	34	0.004881	8.22031	34	0.014139	8.18214	34	0.000679	8.17838	34	0.002061	8.17931
35	3.28e-06	8.22421	35	0.002358	8.22429	35	0.004954	8.22695	35	0.015059	8.18836	35	0.000752	8.18331	35	0.002027	8.18458
36	6.99e-06	8.23107	36	0.002465	8.23093	36	0.005022	8.23359	36	0.015645	8.195	36	0.000825	8.18974	36	0.001939	8.19114
37	1.06e-05	8.23771	37	0.002566	8.23757	37	0.005095	8.24022	37	0.015783	8.20164	37	0.00089	8.19637	37	0.00175	8.19778
38	1.72e-05	8.24434	38	0.002677	8.24444	38	0.005164	8.24686	38	0.015321	8.20827	38	0.000929	8.20301	38	0.001581	8.20442
39	1.6e-05	8.25099	39	0.002792	8.25107	39	0.005217	8.2537	39	0.01484	8.21514	39	0.000964	8.20965	39	0.001448	8.21106
40	1.13e-05	8.25762	40	0.002912	8.25772	40	0.005296	8.26036	40	0.014092	8.22177	40	0.000965	8.21651	40	0.001294	8.21792
41	1.56e-05	8.26426	41	0.003047	8.26436	41	0.005371	8.26699	41	0.013197	8.22843	41	0.000959	8.22315	41	0.001077	8.22455
42	1.41e-05	8.2709	42	0.003184	8.27099	42	0.005437	8.27363	42	0.011628	8.23509	42	0.000909	8.2298	42	0.000807	8.23121
43	8.95e-06	8.27753	43	0.003325	8.27762	43	0.005505	8.28027	43	0.010008	8.24175	43	0.000851	8.23646	43	0.000575	8.23787
44	2.61e-06	8.2844	44	0.003464	8.28427	44	0.005568	8.28689	44	0.008259	8.2484	44	0.000808	8.24312	44	0.000387	8.24453
45	2.18e-06	8.29104	45	0.003618	8.2909	45	0.005625	8.29353	45	0.00659	8.25505	45	0.000772	8.2498	45	0.000311	8.2512
46	3.73e-06	8.29768	46	0.003778	8.29776	46	0.005684	8.30017	46	0.004892	8.26171	46	0.000708	8.25645	46	0.000288	8.25786
47	7.03e-06	8.30432	47	0.003939	8.3044	47	0.005729	8.30701	47	0.003264	8.26844	47	0.000635	8.26311	47	0.00022	8.26451
48	1.02e-05	8.31096	48	0.004095	8.31104	48	0.005782	8.31368	48	0.001814	8.2751	48	0.00056	8.26984	48	0.000105	8.27124
49	1.17e-05	8.31759	49	0.004252	8.31768	49	0.005847	8.32031	49	0.000374	8.28173	49	0.000473	8.27649	49	2.12e-05	8.2779
50	1.1e-05	8.32422	50	0.004414	8.32431	50	0.005889	8.32696	50	1.33e-05	8.28837	50	0.000436	8.28313	50	0	8.28454
51	9.84e-06	8.33087	51	0.00457	8.33093	51	0.005945	8.33359	51	0	8.295	51	0.00044	8.28977	51	1.89e-05	8.29118
52	1.97e-05	8.33773	52	0.00474	8.33758	52	0.00601	8.34023	52	0.00086	8.30164	52	0.000477	8.29641	52	0.000246	8.29781
53	2.95e-05	8.34436	53	0.00491	8.34421	53	0.006067	8.34687	53	0.001953	8.30828	53	0.000528	8.30304	53	0.000466	8.30445
54	3.95e-05	8.351	54	0.005077	8.35108	54	0.006124	8.3535	54	0.003599	8.31491	54	0.000548	8.30968	54	0.000647	8.31109
55	4.26e-05	8.35764	55	0.005251	8.35772	55	0.006192	8.36033	55	0.005752	8.32178	55	0.000542	8.31632	55	0.000828	8.31772
56	4.4e-05	8.36428	56	0.005438	8.36436	56	0.006262	8.367	56	0.007798	8.32841	56	0.000556	8.32318	56	0.001003	8.32459
57	4.12e-05	8.37093	57	0.005628	8.37099	57	0.00632	8.37364	57	0.009394	8.33505	57	0.000597	8.32981	57	0.001178	8.33122
58	3.95e-05	8.37756	58	0.005817	8.37764	58	0.006388	8.38028	58	0.010697	8.34169	58	0.000661	8.33645	58	0.001321	8.33786
59	4.56e-05	8.3842	59	0.006023	8.38427	59	0.006457	8.38692	59	0.010964	8.34833	59	0.000768	8.34309	59	0.00144	8.3445
60	4.91e-05	8.39107	60	0.006239	8.3909	60	0.006532	8.39355	60	0.010739	8.35497	60	0.000843	8.34973	60	0.001534	8.35114
61	4.67e-05	8.39771	61	0.006459	8.39754	61	0.0066	8.40019	61	0.011099	8.3616	61	0.000847	8.35635	61	0.001631	8.35779
62	3.7e-05	8.40435	62	0.006675	8.40441	62	0.006655	8.40682	62	0.011098	8.36824	62	0.000847	8.36299	62	0.001513	8.36443
63	3.28e-05	8.41099	63	0.00691	8.41104	63	0.00671	8.41365	63	0.010808	8.37511	63	0.000881	8.36962	63	0.001327	8.37106
64	3.04e-05	8.41762	64	0.00715	8.41768	64	0.006782	8.42033	64	0.01006	8.38176	64	0.000925	8.3765	64	0.001149	8.37793
65	2.64e-05	8.42426	65	0.007386	8.42432	65	0.006858	8.42697	65	0.00932	8.38839	65	0.000954	8.38314	65	0.000982	8.38457
66	2.2e-05	8.4309	66	0.007642	8.43096	66	0.006934	8.43361	66	0.00897	8.39502	66	0.000973	8.38978	66	0.000823	8.39121
67	2.47e-05	8.43753	67	0.007902	8.4376	67	0.007027	8.44025	67	0.009983	8.40166	67	0.000931	8.39641	67	0.000668	8.39785
68	2.6e-05	8.4444	68	0.008167	8.44424	68	0.007121	8.44689	68	0.011506	8.4083	68	0.000866	8.40305	68	0.000589	8.40448
69	2.2e-05	8.45103	69	0.008437	8.45088	69	0.007211	8.45352	69	0.014015	8.41494	69	0.000784	8.40969	69	0.000677	8.41112
70	1.77e-05	8.45767	70	0.008712	8.45775	70	0.007303	8.46016	70	0.016228	8.42157	70	0.000716	8.41632	70	0.000759	8.41776
71	2.53e-05	8.46431	71	0.008997	8.46439	71	0.007402	8.46698	71	0.016895	8.42844	71	0.000722	8.42296	71	0.000892	8.4244
72	3.69e-05	8.47095	72	0.009294	8.47103	72	0.007525	8.47366	72	0.017505	8.43507	72	0.000776	8.42982	72	0.001081	8.43126
73	4.65e-05	8.47757	73	0.0096	8.47767	73	0.00765	8.48029	73	0.018185	8.44171	73	0.000793	8.43646	73	0.001351	8.43789
74	5.28e-05	8.48421	74	0.009914	8.4843	74	0.007759	8.48693	74	0.018824	8.44834	74	0.000812	8.44309	74	0.001617	8.44453
75	5.49e-05	8.49085	75	0.010231	8.49093	75	0.007874	8.49357	75	0.018446	8.45498	75	0.000861	8.44973	75	0.001811	8.45117
76	6.06e-05	8.49771	76	0.010542	8.49758	76	0.007996	8.50021	76	0.017769	8.46162	76	0.000886	8.45637	76	0.001991	8.4578
77	6.9e-05	8.50435	77	0.010891	8.50421	77	0.008127	8.50685	77	0.016571	8.46826	77	0.000955	8.46301	77	0.002184	8.46443
78	7.87e-05	8.51099	78	0.011254	8.51108	78	0.008255	8.51348	78	0.015607	8.47489	78	0.001056	8.46965	78	0.002356	8.47107
79	8.59e-05	8.51763	79	0.011614	8.51771	79	0.008403	8.5203	79	0.015267	8.48177	79	0.001144	8.47628	79	0.002347	8.4777
80	9.51e-05	8.52426	80	0.011985	8.52435	80	0.008568	8.52699	80	0.015456	8.4884	80	0.001217	8.48315	80	0.002314	8.48457
81	9.66e-05	8.5309	81	0.012372	8.53099	81	0.008741	8.53363	81	0.015884	8.49505	81	0.001252	8.48979	81	0.002204	8.49122
82	9.53e-05	8.53754	82	0.012759	8.53763	82	0.008921	8.54027	82	0.015848	8.50169	82	0.001199	8.49643	82	0.002075	8.49785
83	9.45e-05	8.54418	83	0.013141	8.54425	83	0.009116	8.5469	83	0.015731	8.50832	83	0.001141	8.50307	83	0.001909	8.50449
84	9.57e-05	8.55104	84	0.013552	8.55088	84	0.009323	8.55354	84	0.015459	8.51496	84	0.001085	8.5097	84	0.001728	8.51113
85	9.81e-05	8.55768	85	0.013973	8.55752	85	0.009532	8.56018	85	0.01578	8.52159	85	0.001037	8.51634	85	0.001605	8.51777
86	0.000104	8.56431	86	0.014393	8.56439	86	0.009753	8.56681	86	0.016633	8.52823	86	0.001031	8.52298	86	0.00149	8.5244
87	0.000104	8.57095	87	0.014807	8.57104	87	0.009987	8.57362	87	0.017186	8.53509	87	0.001028	8.52962	87	0.001398	8.53104
88	9.19e-05	8.57759	88	0.01524	8.57767	88	0.010232	8.58031	88	0.017783	8.54172	88	0.000985	8.53648	88	0.001386	8.5379
89	9.38e-05	8.58424	89	0.015682	8.58431	89	0.010489	8.58695	89	0.017864	8.54836	89	0.000932	8.54312	89	0.001418	8.54454
90	9.81e-05	8.59088	90	0.01614	8.59095	90	0.010759	8.59358	90	0.0175	8.555	90	0.000868	8.54975	90	0.001494	8.55117
91	0.000102	8.59751	91	0.016622	8.59759	91	0.011035	8.60022	91	0.017523	8.56164	91	0.000791	8.55639	91	0.001589	8.55781
92	0.000109	8.60439	92	0.017112	8.60422	92	0.011315	8.60686	92	0.017427	8.56827	92	0.000762	8.56303	92	0.001627	8.56445
93	0.000113	8.61102	93	0.017607	8.61085	93	0.011606	8.6135	93	0.017403	8.5749	93	0.000749	8.56967	93	0.001676	8.57109
94	0.000115	8.61767	94	0.018115	8.61772	94	0.011908	8.62013	94	0.017677	8.58154	94	0.000724	8.5763	94	0.001776	8.57772
95	0.000123	8.6243	95	0.018639	8.62436	95	0.012218	8.62694	95	0.017873	8.58841	95	0.000688	8.58293	95	0.001881	8.58436
96	0.000123	8.63094	96	0.019174	8.63099	96	0.01256	8.63365	96	0.017535	8.59504	96	0.000644	8.58981	96	0.002002	8.59122
97	0.000123	8.63757	97	0.019707	8.63763	97	0.012919	8.64028	97	0.017094	8.60169	97	0.000619	8.59645	97	0.002088	8.59787
98	0.000132	8.64421	98	0.020262	8.64427	98	0.013279	8.64692	98	0.016272	8.60833	98	0.000617	8.60309	98	0.002047	8.60451
99	0.000138	8.65085	99	0.020835	8.65091	99	0.013627	8.65356	99	0.015412	8.61496	99	0.000621	8.60973	99	0.001987	8.61114
100	0.000141	8.65771	100	0.021413	8.65755	100	0.014017	8.6602	100	0.014983	8.6216	100	0.000641	8.61636	100	0.001914	8.61778
101	0.000143	8.66435	101	0.021995	8.66418	101	0.014412	8.66683	101	0.014735	8.62824	101	0.000706	8.623	101	0.001849	8.62442
102	0.000142	8.67098	102	0.022599	8.67104	102	0.014814	8.67347	102	0.0151	8.63487	102	0.000762	8.62964	102	0.001845	8.63106
103	0.000144	8.67762	103	0.023218	8.67769	103	0.015239	8.68026	103	0.015444	8.64174	103	0.000777	8.63627	103	0.001832	8.63769
104	0.000144	8.68426	104	0.02383	8.68433	104	0.015675	8.68697	104	0.015588	8.64837	104	0.000793	8.64313	104	0.001747	8.64455
105	0.00014	8.69088	105	0.024482	8.69097	105	0.016116	8.69361	105	0.01568	8.65501	105	0.000811	8.64977	105	0.001632	8.65119
106	0.00014	8.69752	106	0.025157	8.6976	106	0.016548	8.70024	106	0.015671	8.66165	106	0.000819	8.65641	106	0.00153	8.65783
107	0.000143	8.70416	107	0.025842	8.70424	107	0.016985	8.70688	107	0.015205	8.66828	107	0.000799	8.66305	107	0.001455	8.66447
108	0.000144	8.71103	108	0.026516	8.71088	108	0.017449	8.71353	108	0.015093	8.67492	108	0.000776	8.66968	108	0.001406	8.6711
109	0.000132	8.71767	109	0.027241	8.71751	109	0.01793	8.72017	109	0.015547	8.68156	109	0.000736	8.67631	109	0.001347	8.67774
110	0.000131	8.72431	110	0.027976	8.72437	110	0.018371	8.72681	110	0.015164	8.68819	110	0.00068	8.68295	110	0.001287	8.68438
111	0.000133	8.73094	111	0.028704	8.73101	111	0.018838	8.7336	111	0.013774	8.69506	111	0.000586	8.68958	111	0.001242	8.69102
112	0.000134	8.73758	112	0.02946	8.73765	112	0.019314	8.74032	112	0.012424	8.7017	112	0.000484	8.69645	112	0.001212	8.69787
113	0.00013	8.74422	113	0.030262	8.74428	113	0.019786	8.74696	113	0.011107	8.70834	113	0.000417	8.70309	113	0.001199	8.70453
114	0.000126	8.75085	114	0.031074	8.75093	114	0.020291	8.75359	114	0.009922	8.71498	114	0.000367	8.70973	114	0.001201	8.71117
115	0.000126	8.75749	115	0.031863	8.75756	115	0.020791	8.76023	115	0.009696	8.72162	115	0.000337	8.71636	115	0.0011	8.7178
116	0.000125	8.76435	116	0.032702	8.7642	116	0.021275	8.76687	116	0.009836	8.72826	116	0.000343	8.723	116	0.000975	8.72444
117	0.00012	8.77099	117	0.033569	8.77083	117	0.02174	8.7735	117	0.010322	8.73489	117	0.000353	8.72964	117	0.000908	8.73108
118	0.000118	8.77763	118	0.034455	8.77769	118	0.022221	8.78014	118	0.010545	8.74153	118	0.000364	8.73627	118	0.000858	8.73771
119	0.000125	8.78427	119	0.035328	8.78435	119	0.022705	8.78693	119	0.009452	8.74839	119	0.000392	8.74291	119	0.000818	8.74435
120	0.000126	8.79091	120	0.036249	8.79099	120	0.023194	8.79364	120	0.008595	8.75502	120	0.000405	8.74978	120	0.000769	8.7512
121	0.000127	8.79754	121	0.037199	8.79762	121	0.023669	8.80028	121	0.009298	8.76166	121	0.000424	8.75641	121	0.000789	8.75785
122	0.000131	8.80418	122	0.038153	8.80426	122	0.024146	8.80691	122	0.010158	8.7683	122	0.000423	8.76305	122	0.000832	8.76448
123	0.00014	8.81081	123	0.03914	8.81089	123	0.024616	8.81355	123	0.010317	8.77494	123	0.000413	8.76969	123	0.000895	8.77112
124	0.000152	8.81769	124	0.040156	8.81753	124	0.02506	8.82018	124	0.010129	8.78159	124	0.000385	8.77632	124	0.000991	8.77776
125	0.00016	8.82433	125	0.041209	8.82417	125	0.025515	8.82681	125	0.009281	8.78823	125	0.000345	8.78297	125	0.0012	8.7844
126	0.000163	8.83097	126	0.042273	8.83102	126	0.025981	8.83345	126	0.008576	8.79486	126	0.000268	8.7896	126	0.001388	8.79103
127	0.00017	8.8376	127	0.043392	8.83767	127	0.026448	8.84023	127	0.008351	8.80173	127	0.000192	8.79624	127	0.001493	8.79767
128	0.000177	8.84423	128	0.04453	8.8443	128	0.026883	8.84696	128	0.008428	8.80837	128	0.000123	8.8031	128	0.001603	8.80452
129	0.000184	8.85087	129	0.045682	8.85094	129	0.027326	8.8536	129	0.009647	8.81501	129	5.99e-05	8.80975	129	0.001737	8.81118
130	0.000192	8.85751	130	0.04692	8.85758	130	0.027755	8.86024	130	0.011414	8.82165	130	3.21e-05	8.81639	130	0.001903	8.81782
131	0.0002	8.86415	131	0.048187	8.86422	131	0.028165	8.86687	131	0.012116	8.82829	131	7.39e-06	8.82302	131	0.001971	8.82446
132	0.000204	8.87101	132	0.049477	8.87086	132	0.028571	8.87351	132	0.012115	8.83492	132	2.09e-05	8.82966	132	0.001964	8.83109
133	0.000203	8.87764	133	0.050759	8.87749	133	0.028971	8.88015	133	0.012838	8.84156	133	5.03e-05	8.83629	133	0.001928	8.83773
134	0.000205	8.88429	134	0.052136	8.88434	134	0.029356	8.88679	134	0.013913	8.8482	134	8.12e-05	8.84293	134	0.00185	8.84436
135	0.000208	8.89092	135	0.053541	8.891	135	0.029734	8.89355	135	0.014692	8.85506	135	0.000105	8.84957	135	0.001793	8.85101
136	0.000215	8.89756	136	0.054942	8.89764	136	0.030097	8.90028	136	0.015159	8.8617	136	0.000143	8.85643	136	0.001749	8.85785
137	0.000223	8.9042	137	0.056391	8.90427	137	0.030451	8.90692	137	0.015295	8.86833	137	0.000208	8.86307	137	0.001701	8.8645
138	0.000226	8.91084	138	0.057912	8.91092	138	0.030799	8.91356	138	0.015006	8.87497	138	0.000265	8.8697	138	0.00162	8.87114
139	0.000226	8.91747	139	0.059465	8.91755	139	0.031133	8.92019	139	0.014356	8.88161	139	0.000297	8.87634	139	0.001523	8.87778
140	0.000227	8.92434	140	0.060947	8.92419	140	0.031456	8.92685	140	0.013293	8.88825	140	0.000327	8.88298	140	0.001417	8.88442
141	0.000234	8.93098	141	0.062571	8.93082	141	0.031775	8.93348	141	0.012562	8.89488	141	0.000385	8.88963	141	0.001324	8.89105
142	0.000237	8.93762	142	0.064239	8.93767	142	0.032084	8.94012	142	0.011958	8.90152	142	0.000432	8.89627	142	0.001279	8.89769
143	0.000241	8.94426	143	0.065944	8.94432	143	0.032377	8.94688	143	0.011291	8.90839	143	0.000463	8.90291	143	0.001235	8.90433
144	0.000245	8.95089	144	0.067637	8.95096	144	0.03265	8.95363	144	0.011266	8.91503	144	0.0005	8.90977	144	0.001248	8.91118
145	0.000249	8.95753	145	0.069455	8.9576	145	0.032899	8.96027	145	0.011421	8.92167	145	0.000545	8.91642	145	0.001274	8.91784
146	0.000255	8.96417	146	0.071312	8.96424	146	0.033157	8.96691	146	0.011151	8.9283	146	0.000579	8.92305	146	0.001204	8.92448
147	0.000258	8.97081	147	0.073136	8.97089	147	0.0334	8.97354	147	0.010706	8.93494	147	0.000599	8.92969	147	0.001068	8.93111
148	0.00026	8.97767	148	0.075021	8.97752	148	0.03363	8.98018	148	0.010678	8.94158	148	0.000625	8.93632	148	0.000995	8.93775
149	0.000268	8.9843	149	0.076985	8.98416	149	0.033852	8.98682	149	0.010809	8.94821	149	0.000613	8.94297	149	0.000958	8.94438
150	0.000271	8.99094	150	0.079011	8.99101	150	0.034075	8.99346	150	0.011085	8.95485	150	0.000575	8.9496	150	0.00088	8.95102
151	0.000266	8.99758	151	0.080961	8.99767	151	0.034279	9.0002	151	0.011541	8.96172	151	0.000523	8.95624	151	0.000774	8.95766
152	0.000265	9.00422	152	0.083047	9.00431	152	0.034449	9.00695	152	0.012332	8.96835	152	0.000481	8.9631	152	0.000689	8.9645
153	0.000268	9.01085	153	0.085158	9.01095	153	0.034631	9.01359	153	0.013029	8.97499	153	0.000442	8.96974	153	0.000639	8.97116
154	0.000269	9.01749	154	0.087281	9.01759	154	0.034803	9.02023	154	0.013216	8.98163	154	0.000407	8.97637	154	0.000532	8.9778
155	0.000273	9.02413	155	0.089462	9.02422	155	0.034962	9.02686	155	0.013685	8.98827	155	0.000359	8.98301	155	0.00035	8.98443
156	0.000279	9.031	156	0.091701	9.03086	156	0.035087	9.03349	156	0.014522	8.9949	156	0.000292	8.98965	156	0.000301	8.99107
157	0.000284	9.03764	157	0.093973	9.0375	157	0.035218	9.04012	157	0.014968	9.00154	157	0.000225	8.99628	157	0.000436	8.99771
158	0.000292	9.04427	158	0.096258	9.04433	158	0.035333	9.04676	158	0.015179	9.00817	158	0.000172	9.00292	158	0.000535	9.00435
159	0.000298	9.05091	159	0.098631	9.05099	159	0.035412	9.0535	159	0.015547	9.01504	159	0.000178	9.00956	159	0.000594	9.01098
160	0.000302	9.05755	160	0.101034	9.05763	160	0.035489	9.06027	160	0.015716	9.02168	160	0.000202	9.01642	160	0.000673	9.01782
161	0.000307	9.06419	161	0.103449	9.06427	161	0.035562	9.06691	161	0.015629	9.02832	161	0.000213	9.02307	161	0.000817	9.02449
162	0.000313	9.07082	162	0.105861	9.07091	162	0.035636	9.07355	162	0.015622	9.03496	162	0.000232	9.02971	162	0.000942	9.03113
163	0.000316	9.07746	163	0.108366	9.07753	163	0.035678	9.08019	163	0.015302	9.04159	163	0.000249	9.03634	163	0.001007	9.03777
164	0.000326	9.08432	164	0.110894	9.08417	164	0.035715	9.08682	164	0.014749	9.04823	164	0.00028	9.04298	164	0.001093	9.04441
165	0.000334	9.09096	165	0.113343	9.0908	165	0.035757	9.09346	165	0.014147	9.05487	165	0.000326	9.04962	165	0.001171	9.05104
166	0.000335	9.0976	166	0.115923	9.09764	166	0.035806	9.10009	166	0.01382	9.0615	166	0.000392	9.05626	166	0.001195	9.05768
167	0.000335	9.10423	167	0.11854	9.10431	167	0.035831	9.10683	167	0.013853	9.06837	167	0.000447	9.06289	167	0.001167	9.06432
168	0.000337	9.11087	168	0.121137	9.11095	168	0.035852	9.1136	168	0.013748	9.07501	168	0.00045	9.06975	168	0.001184	9.07115
169	0.00034	9.11752	169	0.123741	9.11759	169	0.035878	9.12023	169	0.013271	9.08164	169	0.000453	9.07639	169	0.001115	9.07781
170	0.000352	9.12416	170	0.126433	9.12423	170	0.035895	9.12687	170	0.012761	9.08828	170	0.000431	9.08303	170	0.000959	9.08445
171	0.00036	9.1308	171	0.129167	9.13087	171	0.035907	9.13351	171	0.012724	9.09492	171	0.0004	9.08967	171	0.000771	9.09109
172	0.00037	9.13767	172	0.131844	9.13751	172	0.035919	9.14015	172	0.013023	9.10156	172	0.000353	9.09631	172	0.00059	9.09773
173	0.000383	9.14431	173	0.134604	9.14414	173	0.035928	9.14678	173	0.01394	9.10819	173	0.000301	9.10293	173	0.000441	9.10436
174	0.000385	9.15095	174	0.137414	9.15096	174	0.035932	9.15342	174	0.01511	9.11483	174	0.000219	9.10956	174	0.000311	9.111
175	0.000386	9.15759	175	0.14023	9.15764	175	0.035913	9.16014	175	0.01574	9.1217	175	0.00013	9.1162	175	0.000285	9.11764
176	0.000387	9.16422	176	0.142956	9.16427	176	0.03588	9.16693	176	0.015879	9.12834	176	6.74e-05	9.12306	176	0.000376	9.12447
177	0.00039	9.17086	177	0.14582	9.17091	177	0.035842	9.17357	177	0.016335	9.13498	177	2e-05	9.12971	177	0.000402	9.13115
178	0.000396	9.17749	178	0.148707	9.17755	178	0.035803	9.18021	178	0.017217	9.14162	178	8.46e-06	9.13635	178	0.00039	9.13779
179	0.000399	9.18413	179	0.151526	9.1842	179	0.03575	9.18684	179	0.018096	9.14825	179	0	9.14299	179	0.000473	9.14443
180	0.000398	9.19099	180	0.154342	9.19084	180	0.035681	9.19348	180	0.018564	9.15489	180	2.68e-05	9.14963	180	0.000642	9.15106
181	0.000406	9.19763	181	0.15723	9.19747	181	0.035608	9.20012	181	0.018635	9.16152	181	6.29e-05	9.15627	181	0.000803	9.1577
182	0.000405	9.20427	182	0.160122	9.2043	182	0.035531	9.20675	182	0.018327	9.16816	182	0.000106	9.1629	182	0.000924	9.16433
183	0.000401	9.21091	183	0.162911	9.21099	183	0.035447	9.21347	183	0.017834	9.17503	183	0.000162	9.16954	183	0.001039	9.17097
184	0.000403	9.21754	184	0.1658	9.21762	184	0.035356	9.22025	184	0.017049	9.18166	184	0.000229	9.17638	184	0.001178	9.17779
185	0.000412	9.22417	185	0.168709	9.22426	185	0.03527	9.22689	185	0.016429	9.1883	185	0.000299	9.18304	185	0.001286	9.18447
186	0.00042	9.23081	186	0.17159	9.2309	186	0.035187	9.23353	186	0.016835	9.19494	186	0.000336	9.18967	186	0.001327	9.19111
187	0.00043	9.23744	187	0.174395	9.23754	187	0.035104	9.24017	187	0.01731	9.20157	187	0.000328	9.19631	187	0.001373	9.19774
188	0.000437	9.2443	188	0.177311	9.24418	188	0.03501	9.24681	188	0.017596	9.20822	188	0.000319	9.20295	188	0.001344	9.20439
189	0.000445	9.25096	189	0.180205	9.25081	189	0.034923	9.25344	189	0.018014	9.21485	189	0.000331	9.2096	189	0.001289	9.21101
190	0.000449	9.25759	190	0.183014	9.25762	190	0.034828	9.26008	190	0.018824	9.22149	190	0.000337	9.21624	190	0.001268	9.21765
191	0.000448	9.26422	191	0.185853	9.26431	191	0.034724	9.26679	191	0.0196	9.22836	191	0.000346	9.22287	191	0.001271	9.22428
192	0.000451	9.27087	192	0.188735	9.27094	192	0.034625	9.27359	192	0.020381	9.235	192	0.000349	9.22972	192	0.001326	9.2311
193	0.00046	9.2775	193	0.191583	9.27758	193	0.03452	9.28022	193	0.02113	9.24164	193	0.000358	9.23638	193	0.0014	9.23779
194	0.000469	9.28414	194	0.194329	9.28422	194	0.034415	9.28686	194	0.021467	9.24828	194	0.000369	9.24302	194	0.001396	9.24443
195	0.000472	9.29078	195	0.197141	9.29085	195	0.034305	9.2935	195	0.021212	9.25491	195	0.000339	9.24966	195	0.001339	9.25107
196	0.000475	9.29764	196	0.199942	9.29748	196	0.034183	9.30013	196	0.020286	9.26155	196	0.000305	9.25629	196	0.001265	9.25771
197	0.000484	9.30427	197	0.202659	9.30411	197	0.034066	9.30678	197	0.01899	9.26819	197	0.000324	9.26293	197	0.001204	9.26435
198	0.000493	9.31091	198	0.205351	9.31093	198	0.03396	9.31341	198	0.01776	9.27482	198	0.000355	9.26957	198	0.001217	9.27098
199	0.000496	9.31755	199	0.208089	9.31763	199	0.033853	9.32011	199	0.017446	9.28168	199	0.000372	9.2762	199	0.001282	9.27762
200	0.000499	9.32419	200	0.210829	9.32427	200	0.033738	9.32691	200	0.017153	9.28832	200	0.000405	9.28305	200	0.001307	9.28442
201	0.000504	9.33084	201	0.213453	9.3309	201	0.033626	9.33355	201	0.016605	9.29495	201	0.000425	9.2897	201	0.001256	9.29111
202	0.000511	9.33747	202	0.216113	9.33754	202	0.033501	9.34018	202	0.016095	9.30159	202	0.000432	9.29634	202	0.001186	9.29775
203	0.000515	9.34411	203	0.218768	9.34418	203	0.033378	9.34682	203	0.015601	9.30823	203	0.000416	9.30298	203	0.001066	9.30439
204	0.000519	9.35097	204	0.221387	9.35082	204	0.033254	9.35346	204	0.015575	9.31485	204	0.000382	9.30962	204	0.000985	9.31103
205	0.000524	9.35762	205	0.223966	9.35745	205	0.033141	9.3601	205	0.015597	9.32149	205	0.000389	9.31626	205	0.000929	9.31769
206	0.000527	9.36426	206	0.226565	9.36425	206	0.033046	9.36673	206	0.015646	9.32813	206	0.000388	9.32289	206	0.000861	9.32433
207	0.00053	9.37089	207	0.22916	9.37095	207	0.032942	9.37343	207	0.016201	9.335	207	0.000363	9.32953	207	0.000809	9.33097
208	0.000531	9.37753	208	0.23163	9.37759	208	0.03283	9.38024	208	0.016598	9.34164	208	0.000386	9.33637	208	0.000755	9.33778
209	0.000535	9.38417	209	0.234161	9.38422	209	0.032714	9.38688	209	0.01554	9.34827	209	0.000401	9.34304	209	0.000703	9.34448
210	0.000546	9.3908	210	0.236655	9.39086	210	0.032607	9.39352	210	0.014396	9.35491	210	0.000394	9.34968	210	0.000666	9.35111
211	0.00056	9.39744	211	0.239104	9.39752	211	0.032493	9.40015	211	0.014378	9.36155	211	0.000393	9.35631	211	0.000669	9.35775
212	0.000571	9.4043	212	0.241435	9.40415	212	0.032383	9.40679	212	0.014684	9.36819	212	0.00037	9.36295	212	0.000662	9.36439
213	0.000577	9.41094	213	0.243807	9.41079	213	0.032275	9.41343	213	0.015012	9.37482	213	0.000342	9.36959	213	0.000611	9.37102
214	0.000587	9.41758	214	0.246117	9.41759	214	0.032175	9.42007	214	0.015342	9.38146	214	0.000368	9.37622	214	0.000497	9.37766
215	0.000594	9.42422	215	0.248311	9.4243	215	0.032063	9.42675	215	0.016019	9.38833	215	0.000415	9.38286	215	0.000458	9.3843
216	0.000603	9.43086	216	0.25054	9.43094	216	0.031936	9.43356	216	0.016476	9.39496	216	0.000447	9.38969	216	0.000474	9.39109
217	0.000608	9.43748	217	0.252752	9.43757	217	0.03182	9.4402	217	0.01675	9.4016	217	0.000455	9.39636	217	0.000488	9.3978
218	0.000614	9.44411	218	0.254905	9.44421	218	0.031697	9.44684	218	0.017182	9.40823	218	0.000421	9.403	218	0.000542	9.40443
219	0.00062	9.45075	219	0.256927	9.45085	219	0.031577	9.45348	219	0.018075	9.41487	219	0.000404	9.40963	219	0.000593	9.41107
220	0.000623	9.45761	220	0.259049	9.45749	220	0.031465	9.46013	220	0.01905	9.42151	220	0.000366	9.41627	220	0.000677	9.41771
221	0.000626	9.46426	221	0.26114	9.46412	221	0.031361	9.46677	221	0.019204	9.42815	221	0.000294	9.4229	221	0.000764	9.42433
222	0.00063	9.4709	222	0.263193	9.47091	222	0.03126	9.4734	222	0.019144	9.43478	222	0.000277	9.42953	222	0.000824	9.43097
223	0.000638	9.47754	223	0.265195	9.47762	223	0.031157	9.48009	223	0.019058	9.44166	223	0.000302	9.43617	223	0.000947	9.43761
224	0.000645	9.48418	224	0.267205	9.48425	224	0.031044	9.48691	224	0.017932	9.44829	224	0.000289	9.443	224	0.001079	9.4444
225	0.000646	9.49081	225	0.269169	9.49089	225	0.030925	9.49355	225	0.017008	9.45493	225	0.000254	9.44968	225	0.001169	9.45112
226	0.000652	9.49745	226	0.271052	9.49753	226	0.030814	9.50019	226	0.016373	9.46157	226	0.000259	9.45632	226	0.001268	9.45776
227	0.000663	9.50408	227	0.272953	9.50415	227	0.0307	9.50683	227	0.015618	9.46821	227	0.000311	9.46296	227	0.001335	9.46439
228	0.000671	9.51093	228	0.274845	9.5108	228	0.030601	9.51347	228	0.015254	9.47485	228	0.000347	9.46959	228	0.001362	9.47103
229	0.00068	9.51758	229	0.27667	9.51743	229	0.030495	9.5201	229	0.01505	9.48149	229	0.000387	9.47623	229	0.001365	9.47766
230	0.000688	9.52422	230	0.278412	9.52422	230	0.030388	9.52674	230	0.014335	9.48812	230	0.000455	9.48287	230	0.001324	9.4843
231	0.000686	9.53086	231	0.280144	9.53094	231	0.030294	9.53341	231	0.013301	9.49498	231	0.000579	9.4895	231	0.001294	9.49094
232	0.000691	9.5375	232	0.281843	9.53758	232	0.030188	9.54024	232	0.012405	9.50162	232	0.000683	9.49633	232	0.001313	9.49773
233	0.000696	9.54413	233	0.283466	9.54422	233	0.030082	9.54687	233	0.011762	9.50825	233	0.000727	9.503	233	0.001347	9.50444
234	0.000698	9.55077	234	0.285099	9.55085	234	0.029983	9.55351	234	0.011953	9.51489	234	0.000768	9.50964	234	0.001425	9.51107
235	0.000713	9.55741	235	0.286734	9.55749	235	0.029903	9.56015	235	0.011906	9.52153	235	0.000832	9.51628	235	0.00149	9.51771
236	0.000719	9.56426	236	0.288296	9.56413	236	0.029825	9.56677	236	0.011844	9.52818	236	0.000894	9.52291	236	0.00148	9.52435
237	0.000716	9.57092	237	0.289799	9.57077	237	0.029744	9.57341	237	0.011767	9.53482	237	0.000916	9.52956	237	0.001459	9.53099
238	0.000718	9.57756	238	0.291328	9.57754	238	0.02966	9.58005	238	0.011113	9.54145	238	0.000929	9.53619	238	0.001397	9.53763
239	0.000718	9.5842	239	0.29283	9.58426	239	0.029574	9.58672	239	0.010399	9.54832	239	0.000906	9.54283	239	0.001299	9.54426
240	0.000719	9.59084	240	0.29422	9.5909	240	0.029487	9.59356	240	0.01032	9.55497	240	0.000872	9.54965	240	0.00123	9.55105
241	0.000727	9.59747	241	0.29565	9.59754	241	0.029393	9.60019	241	0.011213	9.5616	241	0.000823	9.55634	241	0.001219	9.55777
242	0.000726	9.60411	242	0.297059	9.60417	242	0.029306	9.60683	242	0.011857	9.56824	242	0.000779	9.56297	242	0.001176	9.56441
243	0.000723	9.61074	243	0.298456	9.61081	243	0.029223	9.61347	243	0.012151	9.57488	243	0.000752	9.56961	243	0.001074	9.57105
244	0.000723	9.61759	244	0.299806	9.61745	244	0.029141	9.6201	244	0.012641	9.58151	244	0.000702	9.57625	244	0.000995	9.57768
245	0.000724	9.62424	245	0.301134	9.62409	245	0.029054	9.62674	245	0.013419	9.58815	245	0.000633	9.58289	245	0.001032	9.58432
246	0.000729	9.63088	246	0.302413	9.63086	246	0.028968	9.63338	246	0.014213	9.59479	246	0.00056	9.58953	246	0.001082	9.59096
247	0.000734	9.63752	247	0.303621	9.6376	247	0.028878	9.64005	247	0.015735	9.60165	247	0.000501	9.59616	247	0.001133	9.59759
248	0.000737	9.64416	248	0.3048	9.64424	248	0.028785	9.64688	248	0.017431	9.60829	248	0.000435	9.60297	248	0.00122	9.60437
249	0.000739	9.65079	249	0.305952	9.65087	249	0.028705	9.65351	249	0.017901	9.61492	249	0.000383	9.60966	249	0.0013	9.61109
250	0.000751	9.65743	250	0.307087	9.65751	250	0.028622	9.66015	250	0.01788	9.62156	250	0.000363	9.61629	250	0.001349	9.61773
251	0.000764	9.66407	251	0.308145	9.66415	251	0.028537	9.6668	251	0.018197	9.6282	251	0.000336	9.62293	251	0.001318	9.62437
252	0.000776	9.67091	252	0.309205	9.67078	252	0.028451	9.67345	252	0.019031	9.63483	252	0.000341	9.62957	252	0.001302	9.63101
253	0.000789	9.67757	253	0.310225	9.67742	253	0.028364	9.68008	253	0.019906	9.64147	253	0.000356	9.63621	253	0.001303	9.63764
254	0.0008	9.68422	254	0.311186	9.68418	254	0.028281	9.68672	254	0.020726	9.64811	254	0.000454	9.64285	254	0.001279	9.64428
255	0.000803	9.69085	255	0.312126	9.69092	255	0.028197	9.69338	255	0.021459	9.65498	255	0.00056	9.64948	255	0.001194	9.65092
256	0.000805	9.69749	256	0.313079	9.69756	256	0.0281	9.70023	256	0.022139	9.66162	256	0.000605	9.65629	256	0.001136	9.65769
257	0.000807	9.70413	257	0.314021	9.70419	257	0.028018	9.70687	257	0.022251	9.66826	257	0.000635	9.66299	257	0.001081	9.66443
258	0.000812	9.71077	258	0.31489	9.71083	258	0.027936	9.7135	258	0.022426	9.6749	258	0.000687	9.66963	258	0.001022	9.67107
259	0.000819	9.7174	259	0.315762	9.71748	259	0.027852	9.72014	259	0.023862	9.68153	259	0.00074	9.67627	259	0.000991	9.67771
260	0.000818	9.72424	260	0.316612	9.72412	260	0.027778	9.72677	260	0.026096	9.68817	260	0.000827	9.68291	260	0.000943	9.68434
261	0.000818	9.7309	261	0.317412	9.73076	261	0.027698	9.73341	261	0.027258	9.69481	261	0.000961	9.68954	261	0.000974	9.69098
262	0.000821	9.73754	262	0.318175	9.73751	262	0.027627	9.74005	262	0.02759	9.70144	262	0.001046	9.69618	262	0.001097	9.69762
263	0.000821	9.74417	263	0.318906	9.74427	263	0.027568	9.74671	263	0.028057	9.7083	263	0.001118	9.70282	263	0.001216	9.70425
264	0.000829	9.75081	264	0.319594	9.7509	264	0.027513	9.75355	264	0.029247	9.71494	264	0.001129	9.70962	264	0.001254	9.71101
265	0.000833	9.75745	265	0.320246	9.75755	265	0.027464	9.76019	265	0.030474	9.72158	265	0.001122	9.71631	265	0.001267	9.71775
266	0.000839	9.76409	266	0.320861	9.76418	266	0.027424	9.76682	266	0.031295	9.72821	266	0.001177	9.72295	266	0.001352	9.72439
267	0.000851	9.77072	267	0.321457	9.77082	267	0.02736	9.77346	267	0.031937	9.73486	267	0.001249	9.72959	267	0.001438	9.73103
268	0.000863	9.77756	268	0.322034	9.77745	268	0.027281	9.78008	268	0.03268	9.74148	268	0.001303	9.73622	268	0.001385	9.73766
269	0.000873	9.78423	269	0.322585	9.78409	269	0.027207	9.78672	269	0.033376	9.74811	269	0.001314	9.74288	269	0.001349	9.7443
270	0.000884	9.79087	270	0.323131	9.79083	270	0.027137	9.79336	270	0.032749	9.75475	270	0.001276	9.74952	270	0.001542	9.75094
271	0.000896	9.79751	271	0.32364	9.79759	271	0.027084	9.80002	271	0.031831	9.76162	271	0.001226	9.75615	271	0.001688	9.75757
272	0.000907	9.80415	272	0.324082	9.80423	272	0.027018	9.80687	272	0.030644	9.76826	272	0.001191	9.76295	272	0.001605	9.76433
273	0.00092	9.81078	273	0.324509	9.81086	273	0.026939	9.81351	273	0.029073	9.7749	273	0.001198	9.76966	273	0.001545	9.77108
274	0.000922	9.81742	274	0.324908	9.8175	274	0.026856	9.82015	274	0.027317	9.78154	274	0.00121	9.7763	274	0.001743	9.77772
275	0.000931	9.82406	275	0.325265	9.82413	275	0.026775	9.82678	275	0.025936	9.78818	275	0.001195	9.78294	275	0.001963	9.78436
276	0.000942	9.83088	276	0.325584	9.83076	276	0.026691	9.83342	276	0.025608	9.79481	276	0.001177	9.78957	276	0.00197	9.791
277	0.000946	9.83756	277	0.325887	9.8374	277	0.026616	9.84006	277	0.02596	9.80145	277	0.001182	9.79621	277	0.001919	9.79763
278	0.000956	9.84419	278	0.326159	9.84414	278	0.026553	9.84669	278	0.026101	9.80808	278	0.001202	9.80284	278	0.002033	9.80427
279	0.000959	9.85083	279	0.326391	9.85091	279	0.026485	9.85334	279	0.026459	9.81495	279	0.00126	9.80948	279	0.002167	9.8109
280	0.000958	9.85746	280	0.326556	9.85755	280	0.026412	9.86019	280	0.027511	9.82158	280	0.001312	9.81628	280	0.002085	9.81765
281	0.000957	9.86412	281	0.326689	9.86418	281	0.02634	9.86683	281	0.028192	9.82822	281	0.001348	9.82298	281	0.001988	9.82441
282	0.000962	9.87076	282	0.326806	9.87082	282	0.026275	9.87346	282	0.029472	9.83486	282	0.001394	9.82962	282	0.002032	9.83104
283	0.000969	9.87739	283	0.326904	9.87746	283	0.026218	9.88011	283	0.031178	9.8415	283	0.001409	9.83626	283	0.002092	9.83768
284	0.000977	9.88422	284	0.326986	9.8841	284	0.026158	9.88674	284	0.032432	9.84815	284	0.001422	9.8429	284	0.001991	9.84432
285	0.00098	9.8909	285	0.327056	9.89074	285	0.026076	9.89338	285	0.03392	9.85478	285	0.001451	9.84952	285	0.001851	9.85097
286	0.000985	9.89754	286	0.327112	9.89746	286	0.026003	9.90002	286	0.034808	9.86142	286	0.001465	9.85616	286	0.001819	9.85761
287	0.000991	9.90418	287	0.32709	9.90423	287	0.025927	9.90667	287	0.034901	9.86829	287	0.00145	9.8628	287	0.001815	9.86424
288	0.00099	9.91082	288	0.327054	9.91087	288	0.025847	9.91353	288	0.034835	9.87493	288	0.001427	9.86958	288	0.001791	9.87098
289	0.000997	9.91746	289	0.327001	9.91751	289	0.025788	9.92017	289	0.034637	9.88157	289	0.001428	9.87631	289	0.001819	9.87775
290	0.001009	9.92409	290	0.32693	9.92415	290	0.025724	9.9268	290	0.034697	9.88821	290	0.001477	9.88294	290	0.001852	9.88439
291	0.001022	9.93073	291	0.32685	9.9308	291	0.025651	9.93344	291	0.034687	9.89484	291	0.001512	9.88958	291	0.001929	9.89103
292	0.001031	9.93754	292	0.326742	9.93743	292	0.025568	9.94008	292	0.034348	9.90148	292	0.001551	9.89621	292	0.002013	9.89767
293	0.001038	9.94422	293	0.326571	9.94407	293	0.02547	9.94671	293	0.034339	9.90811	293	0.001583	9.90286	293	0.002171	9.9043
294	0.001043	9.95086	294	0.326378	9.95079	294	0.025376	9.95335	294	0.03459	9.91475	294	0.001574	9.90949	294	0.002345	9.91093
295	0.001044	9.9575	295	0.326132	9.95758	295	0.025301	9.95999	295	0.034501	9.92162	295	0.001583	9.91612	295	0.002435	9.91757
296	0.001046	9.96413	296	0.325839	9.96422	296	0.025223	9.96685	296	0.034663	9.92825	296	0.001645	9.9229	296	0.002502	9.92431
297	0.001047	9.97076	297	0.325542	9.97086	297	0.02515	9.97348	297	0.034939	9.93489	297	0.00171	9.92962	297	0.00266	9.93107
298	0.001051	9.9774	298	0.325182	9.97749	298	0.025089	9.98012	298	0.03518	9.94153	298	0.001782	9.93626	298	0.00285	9.93771
299	0.001056	9.98404	299	0.324788	9.98413	299	0.025015	9.98677	299	0.035369	9.94817	299	0.001832	9.9429	299	0.00295	9.94435
300	0.00106	9.99085	300	0.324403	9.99077	300	0.024935	9.9934	300	0.035769	9.9548	300	0.001826	9.94954	300	0.003032	9.95099
301	0.001061	9.99755	301	0.32398	9.9974	301	0.024866	10	301	0.03704	9.96144	301	0.001811	9.95618	301	0.003085	9.95761
302	0.001057	10.0042	302	0.323539	10.0041	302	0.024813	10.0067	302	0.038839	9.96807	302	0.001824	9.96281	302	0.003147	9.96425
303	0.00106	10.0108	303	0.32309	10.0109	303	0.024746	10.0133	303	0.039942	9.97495	303	0.001873	9.96945	303	0.003089	9.97088
304	0.001066	10.0175	304	0.322576	10.0175	304	0.024683	10.0202	304	0.039108	9.98159	304	0.001978	9.97622	304	0.002927	9.97761
305	0.001075	10.0241	305	0.322079	10.0242	305	0.024615	10.0268	305	0.038011	9.98823	305	0.002094	9.98296	305	0.002892	9.98439
306	0.001074	10.0307	306	0.321583	10.0308	306	0.024536	10.0335	306	0.036766	9.99486	306	0.00218	9.9896	306	0.003005	9.99104
307	0.001081	10.0374	307	0.321084	10.0374	307	0.024478	10.0401	307	0.035573	10.0015	307	0.002269	9.99624	307	0.003039	9.99767
308	0.001089	10.0442	308	0.320562	10.0441	308	0.024416	10.0467	308	0.035432	10.0081	308	0.002355	10.0029	308	0.002914	10.0043
309	0.001095	10.0509	309	0.320027	10.0507	309	0.024343	10.0534	309	0.035179	10.0148	309	0.002432	10.0095	309	0.002808	10.0109
310	0.001096	10.0575	310	0.319467	10.0574	310	0.024275	10.06	310	0.0348	10.0214	310	0.002516	10.0161	310	0.002716	10.0176
311	0.001103	10.0641	311	0.318903	10.0642	311	0.024182	10.0666	311	0.034368	10.0283	311	0.002595	10.0228	311	0.002614	10.0242
312	0.001114	10.0708	312	0.318319	10.0709	312	0.024086	10.0735	312	0.034227	10.0349	312	0.002632	10.0295	312	0.002575	10.0309
313	0.001116	10.0774	313	0.317723	10.0775	313	0.024024	10.0801	313	0.034499	10.0415	313	0.002645	10.0363	313	0.002599	10.0377
314	0.00112	10.0841	314	0.317146	10.0841	314	0.023951	10.0868	314	0.036545	10.0482	314	0.002647	10.0429	314	0.002737	10.0443
315	0.001124	10.0907	315	0.316534	10.0908	315	0.023878	10.0934	315	0.038639	10.0548	315	0.002647	10.0496	315	0.002832	10.051
316	0.001137	10.0975	316	0.31589	10.0974	316	0.023817	10.1001	316	0.040124	10.0615	316	0.002644	10.0562	316	0.002797	10.0576
317	0.00115	10.1042	317	0.315255	10.1041	317	0.023745	10.1067	317	0.041251	10.0681	317	0.002629	10.0628	317	0.002782	10.0643
318	0.001162	10.1108	318	0.314649	10.1107	318	0.023664	10.1133	318	0.041611	10.0747	318	0.002617	10.0695	318	0.002918	10.0709
319	0.001171	10.1175	319	0.313984	10.1175	319	0.023587	10.12	319	0.042178	10.0816	319	0.002653	10.0761	319	0.003077	10.0775
320	0.001179	10.1241	320	0.313295	10.1242	320	0.023515	10.1268	320	0.042802	10.0882	320	0.002696	10.0829	320	0.003165	10.0843
321	0.001177	10.1308	321	0.312593	10.1308	321	0.023459	10.1335	321	0.04358	10.0949	321	0.002741	10.0896	321	0.003171	10.091
322	0.001179	10.1374	322	0.311878	10.1375	322	0.023401	10.1401	322	0.043516	10.1015	322	0.002785	10.0963	322	0.003132	10.0977
323	0.001187	10.144	323	0.311138	10.1441	323	0.023329	10.1468	323	0.04285	10.1081	323	0.002859	10.1029	323	0.003129	10.1043
324	0.001193	10.1508	324	0.310395	10.1507	324	0.023253	10.1534	324	0.042246	10.1148	324	0.002942	10.1095	324	0.003097	10.111
325	0.0012	10.1575	325	0.30966	10.1574	325	0.023184	10.16	325	0.042059	10.1214	325	0.003	10.1162	325	0.003052	10.1176
326	0.001205	10.1642	326	0.308912	10.1641	326	0.023097	10.1667	326	0.042462	10.128	326	0.003052	10.1228	326	0.003029	10.1242
327	0.001199	10.1708	327	0.308144	10.1709	327	0.022994	10.1733	327	0.043581	10.1349	327	0.003142	10.1294	327	0.003082	10.1309
328	0.001203	10.1775	328	0.307358	10.1775	328	0.022908	10.1802	328	0.044451	10.1416	328	0.003254	10.1362	328	0.0031	10.1376
329	0.001206	10.1841	329	0.306588	10.1842	329	0.022824	10.1868	329	0.045033	10.1482	329	0.003298	10.1429	329	0.003045	10.1444
330	0.001211	10.1907	330	0.305791	10.1908	330	0.022738	10.1934	330	0.045446	10.1548	330	0.003309	10.1496	330	0.003065	10.151
331	0.001225	10.1974	331	0.304987	10.1974	331	0.022655	10.2001	331	0.045171	10.1615	331	0.003347	10.1562	331	0.003073	10.1577
332	0.001232	10.2041	332	0.304192	10.2041	332	0.022572	10.2067	332	0.045195	10.1681	332	0.003421	10.1629	332	0.003049	10.1643
333	0.001233	10.2109	333	0.303391	10.2107	333	0.022487	10.2134	333	0.045798	10.1747	333	0.003455	10.1695	333	0.00305	10.1709
334	0.001232	10.2175	334	0.30258	10.2174	334	0.022408	10.22	334	0.04624	10.1814	334	0.003465	10.1761	334	0.003062	10.1776
335	0.001234	10.2241	335	0.301754	10.2242	335	0.022319	10.2266	335	0.04627	10.1882	335	0.003496	10.1828	335	0.003178	10.1842
336	0.001238	10.2308	336	0.300913	10.2308	336	0.022246	10.2335	336	0.046235	10.1949	336	0.003562	10.1895	336	0.003303	10.1909
337	0.001247	10.2374	337	0.300044	10.2375	337	0.022183	10.2401	337	0.046484	10.2015	337	0.0036	10.1963	337	0.003354	10.1977
338	0.001248	10.244	338	0.29917	10.2441	338	0.022111	10.2468	338	0.047146	10.2082	338	0.003618	10.2029	338	0.003408	10.2043
339	0.00125	10.2507	339	0.29831	10.2508	339	0.022052	10.2534	339	0.047768	10.2148	339	0.003663	10.2096	339	0.003502	10.211
340	0.001251	10.2575	340	0.29745	10.2574	340	0.021985	10.2601	340	0.048269	10.2214	340	0.003749	10.2162	340	0.00359	10.2176
341	0.001249	10.2642	341	0.296583	10.264	341	0.021914	10.2667	341	0.049162	10.2281	341	0.003814	10.2228	341	0.003745	10.2242
342	0.001251	10.2708	342	0.2957	10.2707	342	0.021842	10.2733	342	0.049913	10.2347	342	0.00385	10.2294	342	0.003872	10.2309
343	0.00126	10.2775	343	0.294794	10.2775	343	0.021764	10.28	343	0.050385	10.2416	343	0.003892	10.2361	343	0.00394	10.2375
344	0.00127	10.2841	344	0.293869	10.2842	344	0.021686	10.2868	344	0.050494	10.2482	344	0.003974	10.2428	344	0.00402	10.2442
345	0.001277	10.2907	345	0.292942	10.2908	345	0.021608	10.2935	345	0.050627	10.2548	345	0.004055	10.2496	345	0.003984	10.251
346	0.001285	10.2974	346	0.292042	10.2974	346	0.021526	10.3001	346	0.051044	10.2615	346	0.004072	10.2562	346	0.003895	10.2577
347	0.001292	10.304	347	0.291121	10.3041	347	0.021438	10.3067	347	0.050904	10.2681	347	0.004071	10.2629	347	0.003807	10.2643
348	0.001297	10.3108	348	0.29018	10.3107	348	0.02135	10.3134	348	0.051151	10.2748	348	0.004078	10.2695	348	0.003716	10.2709
349	0.001303	10.3175	349	0.289235	10.3174	349	0.021245	10.32	349	0.051519	10.2814	349	0.004094	10.2761	349	0.003644	10.2776
350	0.00131	10.3241	350	0.288302	10.324	350	0.021155	10.3266	350	0.05101	10.2881	350	0.004103	10.2828	350	0.003622	10.2842
351	0.00132	10.3308	351	0.287319	10.3309	351	0.021055	10.3333	351	0.050628	10.2949	351	0.004119	10.2894	351	0.003624	10.2909
352	0.001331	10.3374	352	0.28635	10.3375	352	0.02095	10.3401	352	0.049989	10.3016	352	0.004133	10.2962	352	0.003629	10.2975
353	0.001335	10.3441	353	0.28543	10.3441	353	0.020855	10.3468	353	0.049473	10.3082	353	0.004153	10.3029	353	0.003616	10.3044
354	0.001345	10.3507	354	0.28452	10.3508	354	0.020763	10.3534	354	0.050341	10.3148	354	0.004152	10.3096	354	0.003573	10.311
355	0.001358	10.3573	355	0.283572	10.3574	355	0.020677	10.3601	355	0.051292	10.3215	355	0.004155	10.3162	355	0.003549	10.3176
356	0.001369	10.3641	356	0.282613	10.3641	356	0.020596	10.3667	356	0.051593	10.3281	356	0.004191	10.3228	356	0.0035	10.3243
357	0.001382	10.3708	357	0.281669	10.3707	357	0.020509	10.3733	357	0.051698	10.3347	357	0.004234	10.3295	357	0.003447	10.3309
358	0.001393	10.3775	358	0.280677	10.3773	358	0.02042	10.38	358	0.050603	10.3414	358	0.004261	10.3361	358	0.003473	10.3376
359	0.001406	10.3841	359	0.279673	10.3842	359	0.020335	10.3866	359	0.049367	10.3482	359	0.004245	10.3428	359	0.003515	10.3442
360	0.001412	10.3908	360	0.278679	10.3908	360	0.020256	10.3935	360	0.04893	10.3549	360	0.004222	10.3495	360	0.003428	10.3509
361	0.00142	10.3974	361	0.277735	10.3975	361	0.020174	10.4001	361	0.048382	10.3615	361	0.004177	10.3562	361	0.003304	10.3577
362	0.001427	10.404	362	0.276762	10.4041	362	0.020101	10.4068	362	0.048706	10.3681	362	0.004126	10.3629	362	0.003269	10.3643
363	0.001439	10.4107	363	0.275768	10.4107	363	0.020031	10.4134	363	0.04944	10.3748	363	0.004146	10.3695	363	0.003277	10.371
364	0.001448	10.4174	364	0.274774	10.4174	364	0.019959	10.42	364	0.049522	10.3814	364	0.004175	10.3762	364	0.003293	10.3776
365	0.001453	10.4242	365	0.273761	10.424	365	0.019884	10.4267	365	0.049973	10.3881	365	0.004155	10.3828	365	0.003311	10.3842
366	0.001461	10.4308	366	0.272767	10.4307	366	0.019815	10.4333	366	0.050596	10.3947	366	0.00413	10.3894	366	0.003336	10.3909
367	0.001471	10.4375	367	0.271793	10.4375	367	0.019775	10.4399	367	0.050805	10.4016	367	0.004141	10.3961	367	0.003311	10.3975
368	0.001481	10.4441	368	0.270841	10.4442	368	0.019701	10.4468	368	0.051452	10.4082	368	0.004167	10.4028	368	0.003209	10.4042
369	0.00149	10.4507	369	0.269875	10.4508	369	0.019637	10.4535	369	0.052468	10.4148	369	0.004235	10.4096	369	0.003078	10.411
370	0.001502	10.4574	370	0.268899	10.4574	370	0.019566	10.4601	370	0.053634	10.4215	370	0.004308	10.4162	370	0.003035	10.4176
371	0.001518	10.464	371	0.267924	10.4641	371	0.019506	10.4667	371	0.054369	10.4281	371	0.004393	10.4229	371	0.003036	10.4243
372	0.001529	10.4707	372	0.266925	10.4707	372	0.019447	10.4734	372	0.054666	10.4348	372	0.004473	10.4295	372	0.003019	10.4309
373	0.001537	10.4775	373	0.265921	10.4773	373	0.019388	10.48	373	0.05471	10.4414	373	0.004471	10.4361	373	0.003087	10.4375
374	0.001543	10.4841	374	0.264933	10.484	374	0.019332	10.4866	374	0.054369	10.448	374	0.004449	10.4428	374	0.003155	10.4442
375	0.001554	10.4908	375	0.264001	10.4909	375	0.019263	10.4933	375	0.0544	10.4549	375	0.00447	10.4494	375	0.003233	10.4508
376	0.001567	10.4974	376	0.263013	10.4975	376	0.019191	10.5001	376	0.054731	10.4615	376	0.00451	10.4561	376	0.003357	10.4575
377	0.001579	10.504	377	0.262025	10.5041	377	0.019109	10.5068	377	0.055646	10.4682	377	0.00453	10.4629	377	0.003529	10.4643
378	0.001588	10.5107	378	0.261072	10.5108	378	0.019054	10.5134	378	0.056557	10.4748	378	0.004566	10.4695	378	0.003703	10.471
379	0.0016	10.5173	379	0.260108	10.5174	379	0.018991	10.52	379	0.057493	10.4814	379	0.004597	10.4762	379	0.003874	10.4776
380	0.001615	10.5241	380	0.259149	10.5241	380	0.018918	10.5267	380	0.058629	10.4881	380	0.004643	10.4828	380	0.004042	10.4842
381	0.001629	10.5308	381	0.258211	10.5307	381	0.018846	10.5333	381	0.060177	10.4947	381	0.004695	10.4895	381	0.004191	10.4909
382	0.001644	10.5375	382	0.257327	10.5373	382	0.018767	10.5399	382	0.061595	10.5013	382	0.004708	10.4961	382	0.004294	10.4975
383	0.001659	10.5441	383	0.256363	10.5442	383	0.018691	10.5466	383	0.062273	10.5082	383	0.004726	10.5027	383	0.004318	10.5042
384	0.001674	10.5507	384	0.255406	10.5508	384	0.018621	10.5535	384	0.062091	10.5148	384	0.004765	10.5094	384	0.004349	10.5108
385	0.001687	10.5574	385	0.254469	10.5575	385	0.018565	10.5601	385	0.061308	10.5215	385	0.004801	10.5162	385	0.004352	10.5177
386	0.001696	10.564	386	0.253554	10.5641	386	0.0185	10.5667	386	0.061061	10.5281	386	0.004869	10.5229	386	0.004353	10.5243
387	0.0017	10.5707	387	0.252609	10.5707	387	0.018434	10.5734	387	0.060893	10.5348	387	0.004937	10.5295	387	0.004377	10.531
388	0.001712	10.5774	388	0.251667	10.5774	388	0.018385	10.58	388	0.061211	10.5414	388	0.004952	10.5362	388	0.004409	10.5376
389	0.00172	10.5841	389	0.250766	10.584	389	0.018337	10.5867	389	0.061327	10.548	389	0.00496	10.5428	389	0.004455	10.5442
390	0.001724	10.5908	390	0.249841	10.5907	390	0.018295	10.5933	390	0.061486	10.5547	390	0.004931	10.5494	390	0.004507	10.5509
391	0.001723	10.5974	391	0.248912	10.5975	391	0.018258	10.5999	391	0.061752	10.5615	391	0.004896	10.5561	391	0.004494	10.5575
392	0.001728	10.6041	392	0.247973	10.6042	392	0.018206	10.6068	392	0.061797	10.5682	392	0.004903	10.5628	392	0.004343	10.5642
393	0.001737	10.6107	393	0.247104	10.6108	393	0.018171	10.6134	393	0.062461	10.5748	393	0.004909	10.5696	393	0.004148	10.571
394	0.001748	10.6174	394	0.246202	10.6174	394	0.018139	10.6201	394	0.063804	10.5815	394	0.004886	10.5762	394	0.00395	10.5776
395	0.001755	10.624	395	0.245284	10.6241	395	0.018109	10.6267	395	0.064817	10.5881	395	0.004845	10.5829	395	0.003783	10.5843
396	0.001767	10.6307	396	0.244383	10.6307	396	0.018072	10.6333	396	0.064843	10.5947	396	0.00477	10.5895	396	0.003664	10.5909
397	0.001782	10.6375	397	0.243482	10.6373	397	0.018029	10.64	397	0.064645	10.6014	397	0.004704	10.5961	397	0.003531	10.5976
398	0.001798	10.6441	398	0.242572	10.644	398	0.017983	10.6466	398	0.06406	10.608	398	0.004675	10.6028	398	0.003382	10.6042
399	0.001816	10.6508	399	0.241672	10.6508	399	0.017943	10.6532	399	0.06347	10.6148	399	0.004682	10.6094	399	0.00322	10.6108
400	0.001835	10.6574	400	0.240794	10.6575	400	0.017891	10.6601	400	0.061701	10.6215	400	0.004709	10.6161	400	0.002971	10.6175
401	0.001856	10.664	401	0.239878	10.6641	401	0.017856	10.6668	401	0.059491	10.6282	401	0.004765	10.6229	401	0.002804	10.6243
402	0.001879	10.6707	402	0.238967	10.6707	402	0.01785	10.6734	402	0.058551	10.6348	402	0.004823	10.6295	402	0.002826	10.631
403	0.001898	10.6773	403	0.238093	10.6774	403	0.017818	10.68	403	0.058277	10.6414	403	0.004882	10.6362	403	0.002845	10.6376
404	0.001919	10.684	404	0.237231	10.684	404	0.017782	10.6867	404	0.058256	10.6481	404	0.004954	10.6428	404	0.00286	10.6443
405	0.001946	10.6908	405	0.236356	10.6907	405	0.017753	10.6933	405	0.058345	10.6547	405	0.005026	10.6494	405	0.002862	10.6509
406	0.001965	10.6975	406	0.235497	10.6973	406	0.017743	10.6999	406	0.058931	10.6613	406	0.005088	10.6561	406	0.002847	10.6575
407	0.001983	10.7041	407	0.234675	10.7042	407	0.017728	10.7066	407	0.05988	10.6682	407	0.005092	10.6627	407	0.002839	10.6642
408	0.002	10.7107	408	0.233829	10.7108	408	0.01771	10.7134	408	0.060724	10.6748	408	0.005081	10.6694	408	0.002815	10.6708
409	0.002014	10.7174	409	0.232978	10.7175	409	0.017684	10.7201	409	0.061597	10.6815	409	0.005054	10.6762	409	0.002793	10.6777
410	0.002035	10.724	410	0.232135	10.7241	410	0.017669	10.7267	410	0.063271	10.6881	410	0.005021	10.6829	410	0.002902	10.6843
411	0.002057	10.7306	411	0.231287	10.7307	411	0.017629	10.7333	411	0.064585	10.6948	411	0.004954	10.6895	411	0.003034	10.6909
412	0.002075	10.7373	412	0.23044	10.7374	412	0.01759	10.74	412	0.065137	10.7014	412	0.004883	10.6961	412	0.003106	10.6976
413	0.002096	10.7441	413	0.229592	10.744	413	0.017569	10.7466	413	0.066174	10.708	413	0.004856	10.7028	413	0.003171	10.7042
414	0.002114	10.7508	414	0.228745	10.7506	414	0.017529	10.7533	414	0.067126	10.7147	414	0.004853	10.7094	414	0.003283	10.7108
415	0.002127	10.7574	415	0.227906	10.7575	415	0.017495	10.7599	415	0.067552	10.7215	415	0.004879	10.716	415	0.003456	10.7175
416	0.002144	10.764	416	0.227074	10.7641	416	0.017458	10.7668	416	0.06781	10.7282	416	0.004912	10.7227	416	0.003559	10.7241
417	0.002169	10.7707	417	0.226248	10.7708	417	0.017426	10.7734	417	0.068034	10.7348	417	0.005009	10.7296	417	0.00358	10.731
418	0.002196	10.7773	418	0.22545	10.7774	418	0.017409	10.78	418	0.068258	10.7415	418	0.005124	10.7362	418	0.003651	10.7376
419	0.002226	10.784	419	0.224637	10.784	419	0.017393	10.7867	419	0.067805	10.7481	419	0.005226	10.7428	419	0.003791	10.7443
420	0.002247	10.7907	420	0.223846	10.7907	420	0.017377	10.7933	420	0.067381	10.7547	420	0.005325	10.7495	420	0.003891	10.7509
421	0.002258	10.7975	421	0.223099	10.7973	421	0.017371	10.8	421	0.066948	10.7614	421	0.005424	10.7561	421	0.004002	10.7575
422	0.002268	10.8041	422	0.222337	10.804	422	0.017353	10.8066	422	0.066096	10.768	422	0.005502	10.7628	422	0.004113	10.7642
423	0.002281	10.8107	423	0.221567	10.8108	423	0.017336	10.8132	423	0.064118	10.7748	423	0.005538	10.7694	423	0.004159	10.7708
424	0.002295	10.8174	424	0.22081	10.8175	424	0.017351	10.8201	424	0.062162	10.7815	424	0.005557	10.7761	424	0.004155	10.7775
425	0.002312	10.824	425	0.220059	10.8241	425	0.017333	10.8267	425	0.061012	10.7881	425	0.005563	10.7829	425	0.003994	10.7843
426	0.00233	10.8307	426	0.219303	10.8307	426	0.01732	10.8334	426	0.060131	10.7948	426	0.005548	10.7895	426	0.003875	10.7909
427	0.002342	10.8373	427	0.218553	10.8374	427	0.017319	10.84	427	0.059124	10.8014	427	0.005517	10.7962	427	0.003974	10.7976
428	0.002353	10.844	428	0.217824	10.844	428	0.017311	10.8467	428	0.058249	10.808	428	0.00553	10.8028	428	0.004067	10.8042
429	0.002363	10.8508	429	0.217076	10.8506	429	0.017301	10.8533	429	0.057779	10.8147	429	0.005545	10.8094	429	0.003982	10.8109
430	0.002376	10.8575	430	0.216327	10.8573	430	0.01729	10.8599	430	0.057134	10.8213	430	0.005576	10.8161	430	0.003857	10.8175
431	0.002405	10.8641	431	0.215594	10.8641	431	0.017283	10.8666	431	0.057345	10.8281	431	0.005621	10.8227	431	0.003823	10.8241
432	0.002434	10.8707	432	0.214881	10.8708	432	0.017271	10.8734	432	0.057874	10.8348	432	0.005689	10.8294	432	0.003852	10.8308
433	0.00246	10.8774	433	0.214163	10.8774	433	0.017254	10.8801	433	0.058465	10.8415	433	0.005754	10.8362	433	0.003947	10.8376
434	0.002483	10.884	434	0.213452	10.8841	434	0.01723	10.8867	434	0.059388	10.8481	434	0.005811	10.8429	434	0.00404	10.8443
435	0.002509	10.8906	435	0.212752	10.8907	435	0.017239	10.8933	435	0.059963	10.8547	435	0.005869	10.8495	435	0.004228	10.8509
436	0.002535	10.8973	436	0.212016	10.8973	436	0.017237	10.9	436	0.060643	10.8614	436	0.00593	10.8561	436	0.004416	10.8575
437	0.002559	10.9041	437	0.211297	10.904	437	0.017235	10.9066	437	0.061181	10.868	437	0.005983	10.8628	437	0.004454	10.8642
438	0.002586	10.9108	438	0.21059	10.9106	438	0.017231	10.9133	438	0.061862	10.8746	438	0.005984	10.8694	438	0.004462	10.8708
439	0.002615	10.9174	439	0.209915	10.9175	439	0.017219	10.9199	439	0.062761	10.8814	439	0.005988	10.876	439	0.004554	10.8775
440	0.002646	10.924	440	0.20922	10.9241	440	0.017204	10.9268	440	0.064011	10.8881	440	0.00594	10.8827	440	0.004583	10.8841
441	0.002671	10.9307	441	0.208524	10.9307	441	0.017197	10.9334	441	0.065241	10.8948	441	0.005861	10.8895	441	0.004478	10.891
442	0.002693	10.9373	442	0.207837	10.9374	442	0.017213	10.94	442	0.066849	10.9014	442	0.00579	10.8962	442	0.004301	10.8976
443	0.002716	10.9439	443	0.207145	10.944	443	0.017219	10.9467	443	0.068508	10.9081	443	0.005723	10.9028	443	0.00413	10.9042
444	0.002744	10.9506	444	0.206472	10.9507	444	0.017218	10.9533	444	0.069705	10.9147	444	0.005658	10.9094	444	0.00397	10.9109
445	0.002766	10.9575	445	0.205809	10.9573	445	0.017206	10.96	445	0.070807	10.9213	445	0.005594	10.9161	445	0.003812	10.9175
446	0.002793	10.9641	446	0.205176	10.9639	446	0.017195	10.9666	446	0.071452	10.928	446	0.005542	10.9227	446	0.003634	10.9241
447	0.002819	10.9707	447	0.20451	10.9708	447	0.017187	10.9732	447	0.072031	10.9348	447	0.005495	10.9293	447	0.003462	10.9308
448	0.002838	10.9774	448	0.203845	10.9774	448	0.017179	10.9801	448	0.071647	10.9415	448	0.005436	10.936	448	0.003336	10.9374
449	0.002859	10.984	449	0.203204	10.9841	449	0.017186	10.9867	449	0.070629	10.9481	449	0.005362	10.9429	449	0.003245	10.9443
450	0.002881	10.9906	450	0.202568	10.9907	450	0.017206	10.9934	450	0.069583	10.9548	450	0.005334	10.9495	450	0.003302	10.9509
451	0.002905	10.9973	451	0.20192	10.9974	451	0.017213	11	451	0.068528	10.9614	451	0.005366	10.9561	451	0.003376	10.9576
452	0.002933	11.0039	452	0.201278	11.004	452	0.017198	11.0067	452	0.067179	10.968	452	0.005394	10.9628	452	0.00343	10.9642
453	0.002956	11.0108	453	0.200675	11.0106	453	0.01719	11.0133	453	0.065967	10.9747	453	0.005422	10.9694	453	0.00347	10.9709
454	0.002982	11.0174	454	0.200012	11.0173	454	0.017193	11.0199	454	0.064927	10.9813	454	0.005447	10.9761	454	0.003555	10.9775
455	0.003014	11.0241	455	0.199357	11.0241	455	0.017198	11.0266	455	0.064119	10.9881	455	0.005445	10.9827	455	0.003669	10.9841
456	0.003043	11.0307	456	0.198725	11.0308	456	0.017206	11.0334	456	0.063394	10.9948	456	0.005443	10.9893	456	0.003832	10.9908
457	0.003077	11.0373	457	0.198106	11.0374	457	0.017221	11.0401	457	0.062727	11.0014	457	0.005515	10.9962	457	0.004018	10.9976
458	0.003116	11.044	458	0.197455	11.044	458	0.017235	11.0467	458	0.062729	11.0081	458	0.005595	11.0028	458	0.00415	11.0043
459	0.003153	11.0506	459	0.196799	11.0507	459	0.01725	11.0533	459	0.063387	11.0147	459	0.005693	11.0095	459	0.004263	11.0109
460	0.003188	11.0573	460	0.196159	11.0573	460	0.01726	11.06	460	0.064048	11.0213	460	0.005784	11.0161	460	0.00427	11.0175
461	0.00322	11.0641	461	0.195508	11.064	461	0.017274	11.0666	461	0.06508	11.028	461	0.005816	11.0227	461	0.004199	11.0242
462	0.00325	11.0708	462	0.194857	11.0706	462	0.017296	11.0732	462	0.065995	11.0346	462	0.005838	11.0294	462	0.004193	11.0308
463	0.003296	11.0774	463	0.194213	11.0775	463	0.01732	11.0799	463	0.066539	11.0414	463	0.005855	11.036	463	0.004243	11.0374
464	0.003335	11.084	464	0.193624	11.0841	464	0.01736	11.0868	464	0.067016	11.0481	464	0.005875	11.0427	464	0.004249	11.0441
465	0.003371	11.0907	465	0.192997	11.0907	465	0.017402	11.0934	465	0.067519	11.0548	465	0.005942	11.0495	465	0.004257	11.0509
466	0.003407	11.0973	466	0.192386	11.0974	466	0.017452	11.1	466	0.068059	11.0614	466	0.006019	11.0562	466	0.004237	11.0576
467	0.00344	11.1039	467	0.191811	11.104	467	0.017498	11.1067	467	0.069176	11.068	467	0.00604	11.0628	467	0.00421	11.0642
468	0.003476	11.1106	468	0.191235	11.1106	468	0.017541	11.1133	468	0.07047	11.0747	468	0.006071	11.0694	468	0.004204	11.0709
469	0.003513	11.1174	469	0.190656	11.1173	469	0.017584	11.1199	469	0.071401	11.0813	469	0.00608	11.0761	469	0.004302	11.0775
470	0.00355	11.1241	470	0.190074	11.1239	470	0.017626	11.1266	470	0.07215	11.0879	470	0.00607	11.0827	470	0.004451	11.0841
471	0.003593	11.1307	471	0.189515	11.1308	471	0.017697	11.1332	471	0.072053	11.0947	471	0.006081	11.0893	471	0.004642	11.0908
472	0.003639	11.1373	472	0.188931	11.1374	472	0.017777	11.1401	472	0.071612	11.1014	472	0.006083	11.096	472	0.004807	11.0974
473	0.003674	11.144	473	0.188345	11.1441	473	0.017862	11.1467	473	0.071178	11.1081	473	0.006094	11.1028	473	0.004813	11.1043
474	0.003721	11.1506	474	0.187758	11.1507	474	0.017929	11.1533	474	0.070679	11.1147	474	0.006129	11.1095	474	0.004791	11.1109
475	0.00377	11.1572	475	0.187186	11.1573	475	0.018001	11.16	475	0.070278	11.1214	475	0.006138	11.1161	475	0.004827	11.1175
476	0.00382	11.1639	476	0.186623	11.164	476	0.018073	11.1666	476	0.070207	11.128	476	0.006118	11.1227	476	0.004885	11.1242
477	0.003876	11.1708	477	0.186042	11.1706	477	0.018139	11.1733	477	0.069344	11.1347	477	0.006079	11.1294	477	0.004795	11.1308
478	0.00393	11.1774	478	0.185488	11.1773	478	0.018219	11.1799	478	0.067905	11.1413	478	0.006086	11.136	478	0.004639	11.1374
479	0.003985	11.184	479	0.184906	11.1841	479	0.018298	11.1866	479	0.067072	11.1481	479	0.006108	11.1427	479	0.004494	11.1441
480	0.004044	11.1907	480	0.184335	11.1907	480	0.018377	11.1934	480	0.067083	11.1548	480	0.006129	11.1493	480	0.004419	11.1507
481	0.004108	11.1973	481	0.183781	11.1974	481	0.018436	11.2001	481	0.06755	11.1614	481	0.006159	11.1562	481	0.004388	11.1576
482	0.004173	11.204	482	0.183244	11.204	482	0.018507	11.2067	482	0.068259	11.1681	482	0.006213	11.1628	482	0.004381	11.1642
483	0.004239	11.2106	483	0.182679	11.2107	483	0.018576	11.2133	483	0.068919	11.1747	483	0.006259	11.1694	483	0.004505	11.1709
484	0.004299	11.2172	484	0.182118	11.2173	484	0.018646	11.22	484	0.068803	11.1814	484	0.006299	11.1761	484	0.004666	11.1775
485	0.004363	11.2241	485	0.181585	11.224	485	0.018734	11.2266	485	0.068463	11.188	485	0.006347	11.1827	485	0.004718	11.1842
486	0.004426	11.2307	486	0.18101	11.2306	486	0.018837	11.2332	486	0.068474	11.1946	486	0.006414	11.1894	486	0.004702	11.1908
487	0.004483	11.2374	487	0.180433	11.2375	487	0.018945	11.2399	487	0.068708	11.2014	487	0.006481	11.196	487	0.004785	11.1974
488	0.004548	11.244	488	0.179867	11.2441	488	0.019043	11.2467	488	0.068673	11.2081	488	0.006498	11.2026	488	0.004833	11.2041
489	0.004615	11.2506	489	0.179325	11.2507	489	0.01918	11.2534	489	0.068353	11.2148	489	0.006521	11.2095	489	0.004796	11.2109
490	0.004683	11.2573	490	0.178744	11.2574	490	0.019316	11.26	490	0.067077	11.2214	490	0.006535	11.2161	490	0.004754	11.2175
491	0.004747	11.2639	491	0.178161	11.264	491	0.019453	11.2667	491	0.0658	11.228	491	0.006533	11.2228	491	0.004697	11.2242
492	0.004812	11.2706	492	0.177603	11.2706	492	0.01959	11.2733	492	0.06496	11.2347	492	0.006514	11.2294	492	0.004683	11.2308
493	0.004881	11.2774	493	0.177074	11.2773	493	0.019746	11.2799	493	0.064336	11.2413	493	0.006485	11.2361	493	0.004651	11.2375
494	0.004956	11.2841	494	0.176535	11.2839	494	0.019913	11.2866	494	0.0644	11.2479	494	0.006436	11.2427	494	0.004507	11.2441
495	0.005037	11.2907	495	0.175989	11.2908	495	0.020074	11.2932	495	0.064351	11.2547	495	0.006379	11.2493	495	0.004385	11.2508
496	0.005121	11.2973	496	0.175457	11.2974	496	0.020238	11.3001	496	0.064248	11.2614	496	0.006317	11.256	496	0.00426	11.2574
497	0.005208	11.304	497	0.174915	11.3041	497	0.020408	11.3067	497	0.064455	11.2681	497	0.006243	11.2628	497	0.004168	11.2643
498	0.005292	11.3106	498	0.174373	11.3107	498	0.020593	11.3133	498	0.065571	11.2747	498	0.006167	11.2695	498	0.004172	11.2709
499	0.005387	11.3172	499	0.173848	11.3173	499	0.020765	11.32	499	0.066861	11.2813	499	0.006116	11.2761	499	0.004163	11.2775
500	0.005483	11.3239	500	0.173331	11.3239	500	0.020953	11.3266	500	0.068097	11.288	500	0.006094	11.2828	500	0.004238	11.2842
501	0.00558	11.3308	501	0.17282	11.3306	501	0.021152	11.3332	501	0.069013	11.2946	501	0.006116	11.2894	501	0.004353	11.2908
502	0.005686	11.3374	502	0.172305	11.3372	502	0.021352	11.3399	502	0.070023	11.3013	502	0.006147	11.296	502	0.004358	11.2974
503	0.00579	11.344	503	0.17177	11.3441	503	0.021558	11.3465	503	0.071692	11.308	503	0.006216	11.3027	503	0.004343	11.3041
504	0.005894	11.3507	504	0.171232	11.3507	504	0.021785	11.3534	504	0.073277	11.3148	504	0.006287	11.3093	504	0.004474	11.3107
505	0.005997	11.3573	505	0.170693	11.3574	505	0.022012	11.36	505	0.074038	11.3214	505	0.006367	11.3162	505	0.004645	11.3176
506	0.006099	11.364	506	0.170161	11.364	506	0.022236	11.3667	506	0.074155	11.328	506	0.006454	11.3228	506	0.004844	11.3242
507	0.006206	11.3706	507	0.169627	11.3706	507	0.022496	11.3733	507	0.074068	11.3347	507	0.006563	11.3294	507	0.005022	11.3309
508	0.006315	11.3772	508	0.169094	11.3773	508	0.022754	11.3799	508	0.07375	11.3413	508	0.006668	11.3361	508	0.005152	11.3375
509	0.00642	11.3841	509	0.168568	11.3839	509	0.023004	11.3866	509	0.073754	11.348	509	0.006739	11.3427	509	0.005187	11.3442
510	0.006536	11.3907	510	0.168075	11.3906	510	0.023269	11.3932	510	0.074104	11.3546	510	0.006805	11.3493	510	0.005074	11.3508
511	0.006654	11.3974	511	0.167549	11.3974	511	0.023549	11.3999	511	0.075071	11.3613	511	0.006843	11.356	511	0.004916	11.3574
512	0.006764	11.404	512	0.167027	11.4041	512	0.023837	11.4067	512	0.075592	11.3681	512	0.006879	11.3626	512	0.004801	11.3641
513	0.006883	11.4107	513	0.166529	11.4107	513	0.024126	11.4134	513	0.074943	11.3748	513	0.00687	11.3695	513	0.004708	11.3709
514	0.00701	11.4173	514	0.166001	11.4173	514	0.024391	11.42	514	0.074482	11.3814	514	0.006845	11.3761	514	0.004564	11.3776
515	0.007137	11.4239	515	0.165483	11.424	515	0.024672	11.4266	515	0.074928	11.388	515	0.00684	11.3828	515	0.004394	11.3842
516	0.007275	11.4306	516	0.164977	11.4306	516	0.024968	11.4333	516	0.075365	11.3947	516	0.006861	11.3894	516	0.00424	11.3909
517	0.007416	11.4374	517	0.164483	11.4373	517	0.025262	11.4399	517	0.075404	11.4013	517	0.006861	11.396	517	0.004108	11.3975
518	0.007559	11.4441	518	0.163983	11.4439	518	0.025576	11.4465	518	0.075329	11.4079	518	0.006848	11.4027	518	0.004024	11.4041
519	0.007702	11.4507	519	0.16348	11.4508	519	0.025892	11.4532	519	0.074908	11.4147	519	0.006832	11.4093	519	0.004023	11.4108
520	0.007843	11.4573	520	0.162977	11.4574	520	0.026191	11.46	520	0.074573	11.4214	520	0.006808	11.416	520	0.004022	11.4174
521	0.007998	11.464	521	0.162476	11.4641	521	0.026512	11.4667	521	0.073996	11.4281	521	0.006787	11.4228	521	0.004164	11.4243
522	0.00816	11.4706	522	0.161952	11.4707	522	0.02683	11.4733	522	0.073446	11.4347	522	0.006774	11.4294	522	0.004313	11.4309
523	0.008316	11.4772	523	0.16143	11.4773	523	0.027141	11.48	523	0.073405	11.4413	523	0.006776	11.4361	523	0.004418	11.4375
524	0.008481	11.4839	524	0.160967	11.484	524	0.027473	11.4866	524	0.073536	11.448	524	0.006782	11.4427	524	0.004512	11.4442
525	0.008647	11.4907	525	0.16046	11.4906	525	0.027809	11.4932	525	0.073628	11.4546	525	0.006763	11.4494	525	0.004642	11.4508
526	0.008811	11.4974	526	0.159957	11.4972	526	0.028148	11.4999	526	0.073697	11.4613	526	0.006704	11.456	526	0.004784	11.4574
527	0.008982	11.504	527	0.159469	11.5041	527	0.028475	11.5065	527	0.074033	11.468	527	0.006655	11.4626	527	0.004897	11.4641
528	0.00916	11.5107	528	0.158974	11.5107	528	0.02879	11.5134	528	0.074374	11.4748	528	0.006628	11.4693	528	0.004998	11.4707
529	0.009341	11.5173	529	0.158464	11.5174	529	0.029124	11.52	529	0.074508	11.4814	529	0.006608	11.4761	529	0.00512	11.4776
530	0.009522	11.5239	530	0.157952	11.524	530	0.029472	11.5267	530	0.074135	11.488	530	0.006596	11.4828	530	0.005247	11.4842
531	0.009705	11.5306	531	0.157462	11.5306	531	0.02979	11.5333	531	0.073773	11.4947	531	0.00658	11.4894	531	0.005226	11.4909
532	0.009895	11.5372	532	0.156982	11.5373	532	0.030137	11.5399	532	0.074336	11.5013	532	0.006613	11.4961	532	0.005197	11.4975
533	0.010093	11.5441	533	0.156507	11.5439	533	0.030485	11.5466	533	0.074823	11.5079	533	0.006658	11.5027	533	0.00524	11.5041
534	0.010292	11.5507	534	0.156026	11.5505	534	0.030823	11.5532	534	0.075044	11.5146	534	0.006734	11.5093	534	0.005326	11.5108
535	0.010504	11.5573	535	0.155575	11.5574	535	0.031169	11.5598	535	0.075258	11.5213	535	0.006817	11.516	535	0.005357	11.5174
536	0.010719	11.564	536	0.155095	11.564	536	0.031508	11.5667	536	0.075617	11.5281	536	0.006924	11.5226	536	0.005367	11.524
537	0.010931	11.5706	537	0.154602	11.5707	537	0.031843	11.5733	537	0.076033	11.5347	537	0.007035	11.5295	537	0.005369	11.5309
538	0.011155	11.5773	538	0.15412	11.5773	538	0.032193	11.58	538	0.07633	11.5414	538	0.007143	11.5361	538	0.005305	11.5375
539	0.011382	11.5839	539	0.153656	11.584	539	0.032549	11.5866	539	0.076602	11.548	539	0.007255	11.5427	539	0.005221	11.5442
540	0.011613	11.5905	540	0.153183	11.5906	540	0.032908	11.5932	540	0.077565	11.5546	540	0.007358	11.5494	540	0.005101	11.5508
541	0.011841	11.5974	541	0.152708	11.5972	541	0.033274	11.5999	541	0.078616	11.5613	541	0.007445	11.556	541	0.004997	11.5574
542	0.012083	11.6041	542	0.152246	11.6039	542	0.033621	11.6065	542	0.07859	11.5679	542	0.007455	11.5626	542	0.004966	11.5641
543	0.012329	11.6107	543	0.151758	11.6107	543	0.033981	11.6132	543	0.07849	11.5746	543	0.00742	11.5693	543	0.004909	11.5707
544	0.012571	11.6173	544	0.151271	11.6174	544	0.034342	11.62	544	0.078406	11.5814	544	0.007382	11.5759	544	0.004818	11.5774
545	0.012812	11.624	545	0.150805	11.624	545	0.03468	11.6267	545	0.078227	11.588	545	0.007366	11.5828	545	0.004732	11.5842
546	0.013068	11.6306	546	0.150343	11.6306	546	0.035029	11.6333	546	0.077851	11.5947	546	0.007343	11.5894	546	0.004586	11.5909
547	0.01333	11.6372	547	0.149891	11.6373	547	0.035372	11.6399	547	0.077369	11.6013	547	0.00733	11.5961	547	0.004474	11.5975
548	0.013584	11.6439	548	0.149442	11.6439	548	0.035697	11.6466	548	0.077323	11.608	548	0.007311	11.6027	548	0.004393	11.6042
549	0.013861	11.6507	549	0.148965	11.6506	549	0.035994	11.6532	549	0.077689	11.6146	549	0.007288	11.6093	549	0.004316	11.6108
550	0.014142	11.6574	550	0.148491	11.6572	550	0.036299	11.6599	550	0.077778	11.6212	550	0.007279	11.616	550	0.004389	11.6174
551	0.014427	11.664	551	0.148032	11.6641	551	0.0366	11.6665	551	0.077729	11.6279	551	0.007284	11.6226	551	0.004483	11.6241
552	0.014713	11.6706	552	0.147582	11.6707	552	0.036896	11.6733	552	0.077796	11.6347	552	0.007312	11.6293	552	0.004415	11.6307
553	0.015006	11.6773	553	0.147137	11.6774	553	0.037182	11.68	553	0.077921	11.6414	553	0.007422	11.6361	553	0.004308	11.6376
554	0.015309	11.6839	554	0.146684	11.684	554	0.037469	11.6866	554	0.078047	11.648	554	0.007527	11.6428	554	0.004214	11.6442
555	0.01562	11.6905	555	0.146221	11.6906	555	0.037754	11.6933	555	0.077554	11.6547	555	0.007592	11.6494	555	0.004129	11.6508
556	0.015944	11.6972	556	0.145774	11.6973	556	0.038011	11.6999	556	0.077165	11.6613	556	0.00765	11.656	556	0.004111	11.6575
557	0.016273	11.7041	557	0.14532	11.7039	557	0.03827	11.7066	557	0.07727	11.6679	557	0.007675	11.6626	557	0.004096	11.6641
558	0.016611	11.7107	558	0.144874	11.7105	558	0.038527	11.7132	558	0.077156	11.6745	558	0.007692	11.6693	558	0.004163	11.6708
559	0.016944	11.7173	559	0.14446	11.7174	559	0.038783	11.7198	559	0.076558	11.6813	559	0.007711	11.6759	559	0.004277	11.6774
560	0.017293	11.724	560	0.144054	11.724	560	0.039046	11.7267	560	0.075955	11.6881	560	0.007736	11.6826	560	0.004251	11.684
561	0.017644	11.7306	561	0.143627	11.7307	561	0.039294	11.7333	561	0.074915	11.6947	561	0.007767	11.6894	561	0.00416	11.6909
562	0.017987	11.7372	562	0.14319	11.7373	562	0.039523	11.74	562	0.073795	11.7013	562	0.007803	11.6961	562	0.004206	11.6975
563	0.018355	11.7439	563	0.142774	11.7439	563	0.039733	11.7466	563	0.072974	11.708	563	0.0078	11.7027	563	0.004379	11.7042
564	0.018726	11.7505	564	0.142359	11.7506	564	0.039942	11.7532	564	0.072363	11.7146	564	0.007801	11.7094	564	0.004537	11.7108
565	0.019096	11.7574	565	0.141942	11.7572	565	0.04015	11.7599	565	0.072463	11.7212	565	0.007797	11.716	565	0.004679	11.7174
566	0.019465	11.764	566	0.141529	11.7639	566	0.040357	11.7665	566	0.072519	11.7279	566	0.007755	11.7226	566	0.004834	11.7241
567	0.019853	11.7706	567	0.141115	11.7707	567	0.040547	11.7732	567	0.071609	11.7346	567	0.007742	11.7293	567	0.005042	11.7307
568	0.020242	11.7773	568	0.140679	11.7774	568	0.040731	11.78	568	0.070364	11.7414	568	0.007807	11.7359	568	0.005219	11.7374
569	0.020627	11.7839	569	0.140243	11.784	569	0.040906	11.7867	569	0.069612	11.748	569	0.007867	11.7428	569	0.005363	11.7442
570	0.021025	11.7906	570	0.13982	11.7906	570	0.041043	11.7933	570	0.069234	11.7547	570	0.007925	11.7494	570	0.00553	11.7509
571	0.021441	11.7972	571	0.139398	11.7973	571	0.041189	11.7999	571	0.069562	11.7613	571	0.007978	11.756	571	0.005596	11.7575
572	0.021868	11.8038	572	0.138982	11.8039	572	0.041333	11.8066	572	0.070332	11.7679	572	0.007956	11.7627	572	0.005613	11.7641
573	0.022288	11.8107	573	0.138568	11.8105	573	0.041476	11.8132	573	0.070419	11.7746	573	0.007919	11.7693	573	0.005589	11.7708
574	0.022737	11.8173	574	0.138151	11.8172	574	0.041597	11.8198	574	0.069504	11.7812	574	0.007849	11.7759	574	0.005577	11.7774
575	0.023198	11.824	575	0.137739	11.824	575	0.041704	11.8265	575	0.068797	11.7879	575	0.007791	11.7826	575	0.005635	11.784
576	0.023657	11.8306	576	0.13733	11.8307	576	0.0418	11.8333	576	0.068776	11.7947	576	0.007803	11.7892	576	0.005699	11.7907
577	0.024125	11.8373	577	0.136929	11.8373	577	0.041889	11.84	577	0.069205	11.8014	577	0.007808	11.7961	577	0.005724	11.7975
578	0.024607	11.8439	578	0.13653	11.844	578	0.041969	11.8466	578	0.069267	11.808	578	0.007774	11.8027	578	0.005756	11.8042
579	0.025104	11.8505	579	0.136141	11.8506	579	0.042048	11.8533	579	0.06899	11.8146	579	0.007761	11.8094	579	0.00574	11.8108
580	0.025596	11.8572	580	0.135753	11.8572	580	0.042125	11.8599	580	0.068209	11.8213	580	0.007722	11.816	580	0.005696	11.8174
581	0.026121	11.864	581	0.135373	11.8639	581	0.042183	11.8665	581	0.06717	11.8279	581	0.007659	11.8226	581	0.005772	11.8241
582	0.026657	11.8707	582	0.134968	11.8705	582	0.042209	11.8732	582	0.066459	11.8346	582	0.007693	11.8293	582	0.005843	11.8307
583	0.027202	11.8773	583	0.13457	11.8774	583	0.042243	11.8798	583	0.066205	11.8412	583	0.007779	11.8359	583	0.005874	11.8374
584	0.027754	11.8839	584	0.134193	11.884	584	0.042272	11.8867	584	0.067411	11.8481	584	0.00788	11.8425	584	0.005909	11.844
585	0.028324	11.8906	585	0.133796	11.8907	585	0.04228	11.8933	585	0.068511	11.8547	585	0.007983	11.8494	585	0.005858	11.8509
586	0.028905	11.8972	586	0.133403	11.8973	586	0.042277	11.8999	586	0.069033	11.8613	586	0.008061	11.856	586	0.005743	11.8575
587	0.029487	11.9039	587	0.133018	11.9039	587	0.04227	11.9066	587	0.069679	11.868	587	0.008135	11.8627	587	0.005618	11.8641
588	0.030126	11.9105	588	0.132643	11.9106	588	0.04226	11.9132	588	0.071351	11.8746	588	0.008174	11.8693	588	0.005496	11.8708
589	0.030779	11.9174	589	0.132259	11.9172	589	0.042235	11.9199	589	0.073178	11.8812	589	0.008168	11.876	589	0.005419	11.8774
590	0.031449	11.924	590	0.131877	11.9238	590	0.042183	11.9265	590	0.074815	11.8879	590	0.008185	11.8826	590	0.005412	11.884
591	0.03212	11.9306	591	0.131507	11.9307	591	0.042123	11.9331	591	0.076251	11.8946	591	0.008202	11.8893	591	0.005416	11.8907
592	0.032838	11.9373	592	0.131129	11.9373	592	0.042086	11.94	592	0.076961	11.9014	592	0.00819	11.8959	592	0.005454	11.8973
593	0.03357	11.9439	593	0.130748	11.944	593	0.042024	11.9467	593	0.077563	11.908	593	0.008175	11.9028	593	0.005483	11.9042
594	0.034309	11.9505	594	0.130367	11.9506	594	0.041954	11.9533	594	0.077577	11.9147	594	0.008164	11.9094	594	0.005431	11.9108
595	0.035095	11.9572	595	0.130019	11.9573	595	0.041894	11.9599	595	0.0774	11.9213	595	0.008199	11.916	595	0.0054	11.9175
596	0.035926	11.9638	596	0.129665	11.9639	596	0.041833	11.9666	596	0.076948	11.9279	596	0.008243	11.9227	596	0.00541	11.9241
597	0.036787	11.9707	597	0.129304	11.9705	597	0.041754	11.9732	597	0.075847	11.9346	597	0.008268	11.9293	597	0.005416	11.9307
598	0.037634	11.9773	598	0.128951	11.9772	598	0.041659	11.9798	598	0.074563	11.9412	598	0.008291	11.936	598	0.005439	11.9374
599	0.038564	11.984	599	0.128593	11.984	599	0.041553	11.9865	599	0.073999	11.9479	599	0.008333	11.9426	599	0.005463	11.944
600	0.039523	11.9906	600	0.128242	11.9907	600	0.04145	11.9933	600	0.073764	11.9547	600	0.008373	11.9492	600	0.005495	11.9506
601	0.040508	11.9972	601	0.127895	11.9973	601	0.041357	12	601	0.07378	11.9613	601	0.008449	11.9561	601	0.005537	11.9575
602	0.041548	12.0039	602	0.127575	12.004	602	0.041259	12.0066	602	0.073837	11.968	602	0.008532	11.9627	602	0.005509	11.9641
603	0.042666	12.0105	603	0.127247	12.0106	603	0.041155	12.0132	603	0.073869	11.9746	603	0.008606	11.9694	603	0.005458	11.9708
604	0.04383	12.0172	604	0.126918	12.0172	604	0.041027	12.0199	604	0.073954	11.9812	604	0.008702	11.976	604	0.005456	11.9774
605	0.045016	12.024	605	0.126586	12.0239	605	0.040891	12.0265	605	0.073915	11.9879	605	0.008734	11.9826	605	0.005439	11.9841
606	0.046324	12.0307	606	0.126231	12.0305	606	0.040751	12.0331	606	0.074008	11.9945	606	0.00873	11.9893	606	0.005424	11.9907
607	0.047685	12.0373	607	0.125885	12.0374	607	0.040625	12.0398	607	0.073986	12.0012	607	0.008753	11.9959	607	0.005407	11.9973
608	0.049104	12.0439	608	0.125553	12.044	608	0.040514	12.0467	608	0.073508	12.008	608	0.008806	12.0025	608	0.005333	12.004
609	0.050574	12.0506	609	0.125242	12.0506	609	0.040408	12.0533	609	0.072907	12.0147	609	0.008868	12.0094	609	0.005219	12.0108
610	0.052165	12.0572	610	0.124919	12.0573	610	0.040298	12.0599	610	0.072849	12.0213	610	0.008948	12.0161	610	0.005044	12.0175
611	0.053825	12.0638	611	0.124593	12.0639	611	0.04017	12.0666	611	0.072498	12.0279	611	0.009016	12.0227	611	0.004842	12.0241
612	0.055518	12.0705	612	0.124278	12.0706	612	0.040033	12.0732	612	0.071859	12.0346	612	0.009074	12.0293	612	0.004728	12.0308
613	0.057362	12.0773	613	0.123958	12.0772	613	0.0399	12.0798	613	0.07157	12.0412	613	0.009099	12.036	613	0.004726	12.0374
614	0.05933	12.084	614	0.123652	12.0838	614	0.039789	12.0865	614	0.071738	12.0479	614	0.009087	12.0426	614	0.004745	12.044
615	0.061376	12.0906	615	0.123361	12.0907	615	0.039682	12.0931	615	0.071967	12.0545	615	0.009096	12.0492	615	0.004782	12.0507
616	0.063446	12.0973	616	0.123108	12.0973	616	0.039571	12.1	616	0.071813	12.0614	616	0.009114	12.0559	616	0.004827	12.0573
617	0.065748	12.1039	617	0.122851	12.104	617	0.039446	12.1066	617	0.072445	12.068	617	0.009121	12.0627	617	0.004935	12.0642
618	0.06816	12.1105	618	0.1226	12.1106	618	0.039306	12.1133	618	0.073631	12.0746	618	0.009094	12.0694	618	0.005072	12.0708
619	0.070624	12.1172	619	0.122353	12.1173	619	0.039175	12.1199	619	0.074033	12.0813	619	0.009062	12.076	619	0.005291	12.0775
620	0.07332	12.1238	620	0.122106	12.1239	620	0.039063	12.1265	620	0.073514	12.0879	620	0.009066	12.0826	620	0.005521	12.0841
621	0.0762	12.1307	621	0.121863	12.1305	621	0.038963	12.1332	621	0.07324	12.0945	621	0.009085	12.0893	621	0.0057	12.0907
622	0.079212	12.1373	622	0.121632	12.1372	622	0.038869	12.1398	622	0.072224	12.1012	622	0.009056	12.0959	622	0.005831	12.0974
623	0.082271	12.144	623	0.121425	12.144	623	0.038766	12.1464	623	0.070817	12.1078	623	0.00901	12.1026	623	0.005866	12.104
624	0.085604	12.1506	624	0.121207	12.1507	624	0.03865	12.1533	624	0.069534	12.1147	624	0.009025	12.1092	624	0.005899	12.1106
625	0.0891	12.1572	625	0.120983	12.1573	625	0.038557	12.16	625	0.068578	12.1213	625	0.00907	12.1161	625	0.005957	12.1175
626	0.092736	12.1639	626	0.120757	12.1639	626	0.038462	12.1666	626	0.067918	12.128	626	0.009142	12.1227	626	0.006018	12.1242
627	0.096528	12.1705	627	0.120546	12.1706	627	0.038376	12.1732	627	0.067148	12.1346	627	0.00922	12.1294	627	0.006023	12.1308
628	0.100609	12.1771	628	0.120325	12.1772	628	0.038313	12.1799	628	0.066466	12.1412	628	0.009302	12.136	628	0.006026	12.1374
629	0.104846	12.184	629	0.120103	12.1839	629	0.038236	12.1865	629	0.066018	12.1479	629	0.009378	12.1426	629	0.006003	12.1441
630	0.109138	12.1906	630	0.119904	12.1905	630	0.038151	12.1931	630	0.065536	12.1545	630	0.009412	12.1493	630	0.005993	12.1507
631	0.113801	12.1973	631	0.119707	12.1974	631	0.038062	12.1998	631	0.064608	12.1612	631	0.009445	12.1559	631	0.00598	12.1573
632	0.118662	12.2039	632	0.11951	12.204	632	0.037984	12.2066	632	0.06513	12.168	632	0.009523	12.1625	632	0.005911	12.164
633	0.123701	12.2105	633	0.119315	12.2106	633	0.037921	12.2133	633	0.066582	12.1747	633	0.009606	12.1694	633	0.005812	12.1708
634	0.128945	12.2172	634	0.119137	12.2173	634	0.037877	12.2199	634	0.067426	12.1813	634	0.009646	12.176	634	0.005665	12.1775
635	0.134528	12.2238	635	0.118962	12.2239	635	0.037821	12.2265	635	0.067997	12.1879	635	0.009674	12.1827	635	0.005504	12.1841
636	0.140328	12.2305	636	0.118804	12.2305	636	0.03777	12.2332	636	0.068707	12.1946	636	0.009692	12.1893	636	0.005358	12.1908
637	0.146161	12.2373	637	0.118659	12.2372	637	0.037725	12.2398	637	0.069515	12.2012	637	0.009697	12.1959	637	0.005229	12.1974
638	0.152442	12.244	638	0.118523	12.2438	638	0.037675	12.2465	638	0.069977	12.2079	638	0.009709	12.2026	638	0.005141	12.204
639	0.158995	12.2506	639	0.118386	12.2507	639	0.037642	12.2531	639	0.070026	12.2145	639	0.009743	12.2092	639	0.005013	12.2107
640	0.165717	12.2573	640	0.118252	12.2573	640	0.037632	12.26	640	0.070487	12.2214	640	0.009768	12.2159	640	0.004796	12.2173
641	0.172542	12.2639	641	0.118138	12.264	641	0.037637	12.2666	641	0.070889	12.228	641	0.009768	12.2227	641	0.004656	12.2242
642	0.179823	12.2705	642	0.118047	12.2706	642	0.037645	12.2733	642	0.070861	12.2346	642	0.009775	12.2294	642	0.004654	12.2308
643	0.187332	12.2772	643	0.117954	12.2772	643	0.037663	12.2799	643	0.070915	12.2413	643	0.009804	12.236	643	0.004682	12.2374
644	0.194857	12.2838	644	0.117858	12.2839	644	0.037693	12.2865	644	0.071103	12.2479	644	0.00983	12.2426	644	0.004651	12.2441
645	0.202851	12.2907	645	0.117786	12.2905	645	0.037726	12.2932	645	0.07127	12.2545	645	0.009855	12.2493	645	0.004607	12.2507
646	0.211099	12.2973	646	0.11772	12.2971	646	0.037755	12.2998	646	0.071403	12.2612	646	0.009887	12.2559	646	0.004673	12.2574
647	0.21958	12.3039	647	0.117652	12.304	647	0.037798	12.3064	647	0.071753	12.2678	647	0.009904	12.2625	647	0.004736	12.264
648	0.228067	12.3106	648	0.117593	12.3107	648	0.037855	12.3133	648	0.072212	12.2747	648	0.009914	12.2692	648	0.004714	12.2706
649	0.237151	12.3172	649	0.117537	12.3173	649	0.037929	12.3199	649	0.07289	12.2813	649	0.009939	12.276	649	0.004703	12.2775
650	0.246416	12.3239	650	0.117492	12.3239	650	0.038005	12.3266	650	0.07357	12.288	650	0.009984	12.2827	650	0.004784	12.2841
651	0.255741	12.3305	651	0.117451	12.3306	651	0.038073	12.3332	651	0.07516	12.2946	651	0.010038	12.2893	651	0.004863	12.2908
652	0.265484	12.3371	652	0.117407	12.3372	652	0.038144	12.3399	652	0.077054	12.3012	652	0.010091	12.296	652	0.004914	12.2974
653	0.275492	12.344	653	0.117391	12.3438	653	0.038229	12.3465	653	0.077717	12.3079	653	0.010135	12.3026	653	0.004993	12.304
654	0.285759	12.3506	654	0.117391	12.3505	654	0.038308	12.3531	654	0.077994	12.3145	654	0.010174	12.3092	654	0.005219	12.3107
655	0.295946	12.3573	655	0.11739	12.3573	655	0.038394	12.3598	655	0.078205	12.3211	655	0.010174	12.3159	655	0.005478	12.3173
656	0.306732	12.3639	656	0.117393	12.364	656	0.03851	12.3666	656	0.078232	12.328	656	0.010105	12.3225	656	0.005611	12.3239
657	0.317776	12.3705	657	0.117405	12.3706	657	0.038637	12.3733	657	0.078076	12.3346	657	0.010055	12.3294	657	0.005741	12.3308
658	0.328838	12.3772	658	0.11743	12.3772	658	0.038763	12.3799	658	0.077992	12.3413	658	0.010012	12.336	658	0.005903	12.3375
659	0.339967	12.3838	659	0.117472	12.3839	659	0.038887	12.3865	659	0.077794	12.3479	659	0.009943	12.3427	659	0.006047	12.3441
660	0.351638	12.3905	660	0.11754	12.3905	660	0.03901	12.3932	660	0.077206	12.3545	660	0.009899	12.3493	660	0.006176	12.3507
661	0.363505	12.3973	661	0.117613	12.3972	661	0.039136	12.3998	661	0.076212	12.3612	661	0.009855	12.3559	661	0.006311	12.3574
662	0.374956	12.404	662	0.117694	12.4038	662	0.039274	12.4064	662	0.074924	12.3678	662	0.009841	12.3626	662	0.006394	12.364
663	0.387155	12.4106	663	0.117775	12.4107	663	0.039414	12.4131	663	0.073979	12.3745	663	0.009828	12.3692	663	0.006417	12.3706
664	0.399486	12.4172	664	0.117874	12.4173	664	0.039572	12.42	664	0.073544	12.3813	664	0.009831	12.3758	664	0.006402	12.3773
665	0.411783	12.4239	665	0.117979	12.4239	665	0.039729	12.4266	665	0.073305	12.388	665	0.009858	12.3827	665	0.006391	12.3841
666	0.424122	12.4305	666	0.118084	12.4306	666	0.039887	12.4332	666	0.073634	12.3946	666	0.009988	12.3893	666	0.00637	12.3908
667	0.436891	12.4371	667	0.118211	12.4372	667	0.040049	12.4399	667	0.07391	12.4012	667	0.010128	12.396	667	0.006355	12.3974
668	0.449792	12.4438	668	0.118345	12.4438	668	0.040216	12.4465	668	0.073298	12.4079	668	0.010265	12.4026	668	0.006354	12.404
669	0.462499	12.4506	669	0.11849	12.4505	669	0.040385	12.4532	669	0.072635	12.4145	669	0.010396	12.4093	669	0.006243	12.4107
670	0.475526	12.4573	670	0.118632	12.4571	670	0.040552	12.4598	670	0.072195	12.4211	670	0.010485	12.4159	670	0.006098	12.4173
671	0.488702	12.4639	671	0.118787	12.464	671	0.040734	12.4664	671	0.071683	12.4278	671	0.010574	12.4225	671	0.006069	12.424
672	0.501957	12.4706	672	0.118954	12.4706	672	0.040924	12.4733	672	0.07158	12.4346	672	0.010649	12.4292	672	0.006095	12.4306
673	0.514938	12.4772	673	0.119133	12.4773	673	0.041112	12.4799	673	0.071741	12.4413	673	0.010733	12.436	673	0.006094	12.4375
674	0.528361	12.4838	674	0.119313	12.4839	674	0.041293	12.4866	674	0.071291	12.4479	674	0.010787	12.4427	674	0.006051	12.4441
675	0.54188	12.4905	675	0.11951	12.4905	675	0.041491	12.4932	675	0.070455	12.4545	675	0.010826	12.4493	675	0.005992	12.4507
676	0.555053	12.4971	676	0.119729	12.4972	676	0.041692	12.4999	676	0.069319	12.4612	676	0.010824	12.4559	676	0.00595	12.4574
677	0.568323	12.504	677	0.119958	12.5038	677	0.041881	12.5065	677	0.068229	12.4678	677	0.010811	12.4626	677	0.005912	12.464
678	0.58186	12.5106	678	0.120195	12.5105	678	0.042079	12.5131	678	0.068149	12.4745	678	0.010795	12.4692	678	0.005897	12.4707
679	0.595442	12.5172	679	0.120442	12.5173	679	0.042288	12.5198	679	0.068779	12.4811	679	0.010771	12.4759	679	0.006029	12.4773
680	0.608458	12.5239	680	0.120692	12.524	680	0.042499	12.5266	680	0.069394	12.488	680	0.01075	12.4825	680	0.006208	12.4839
681	0.622013	12.5305	681	0.120954	12.5306	681	0.042706	12.5333	681	0.069563	12.4946	681	0.010735	12.4893	681	0.006255	12.4908
682	0.635606	12.5372	682	0.121243	12.5372	682	0.042913	12.5399	682	0.069427	12.5012	682	0.010732	12.496	682	0.00624	12.4974
683	0.648823	12.5438	683	0.121538	12.5439	683	0.043132	12.5465	683	0.069562	12.5079	683	0.010777	12.5026	683	0.006289	12.5041
684	0.661741	12.5504	684	0.121831	12.5505	684	0.043358	12.5532	684	0.070117	12.5145	684	0.010842	12.5093	684	0.006361	12.5107
685	0.674998	12.5573	685	0.12214	12.5572	685	0.043577	12.5598	685	0.071586	12.5212	685	0.010934	12.5159	685	0.006411	12.5174
686	0.688126	12.5639	686	0.12246	12.5638	686	0.04381	12.5664	686	0.073001	12.5278	686	0.011024	12.5225	686	0.00644	12.524
687	0.700799	12.5706	687	0.122784	12.5707	687	0.044047	12.5731	687	0.074232	12.5344	687	0.011091	12.5292	687	0.006452	12.5306
688	0.713558	12.5772	688	0.123142	12.5773	688	0.044281	12.5799	688	0.075177	12.5413	688	0.011162	12.5358	688	0.006477	12.5373
689	0.726234	12.5838	689	0.123521	12.5839	689	0.044515	12.5866	689	0.075942	12.548	689	0.011213	12.5427	689	0.006493	12.5441
690	0.73873	12.5905	690	0.123911	12.5906	690	0.044767	12.5932	690	0.076931	12.5546	690	0.011262	12.5493	690	0.0064	12.5508
691	0.750601	12.5971	691	0.124318	12.5972	691	0.045022	12.5999	691	0.07791	12.5612	691	0.011355	12.556	691	0.006304	12.5574
692	0.762714	12.6038	692	0.124734	12.6038	692	0.045253	12.6065	692	0.07867	12.5679	692	0.011422	12.5626	692	0.006224	12.564
693	0.774656	12.6106	693	0.125165	12.6105	693	0.045505	12.6131	693	0.078184	12.5745	693	0.011446	12.5692	693	0.006149	12.5707
694	0.786288	12.6173	694	0.125613	12.6171	694	0.045756	12.6198	694	0.077417	12.5811	694	0.011467	12.5759	694	0.006098	12.5773
695	0.797637	12.6239	695	0.126076	12.624	695	0.046008	12.6264	695	0.076293	12.5878	695	0.011451	12.5825	695	0.006051	12.584
696	0.809043	12.6305	696	0.126556	12.6306	696	0.046273	12.6333	696	0.075293	12.5946	696	0.011434	12.5891	696	0.00601	12.5906
697	0.820161	12.6372	697	0.127047	12.6373	697	0.046521	12.6399	697	0.074824	12.6013	697	0.011478	12.596	697	0.005967	12.5975
698	0.830581	12.6438	698	0.127551	12.6439	698	0.04676	12.6465	698	0.074805	12.6079	698	0.011535	12.6026	698	0.00594	12.6041
699	0.841166	12.6504	699	0.128078	12.6505	699	0.046996	12.6532	699	0.074073	12.6145	699	0.011639	12.6093	699	0.005968	12.6107
700	0.851551	12.6571	700	0.128619	12.6572	700	0.047238	12.6598	700	0.07269	12.6212	700	0.011751	12.6159	700	0.006054	12.6174
701	0.861496	12.664	701	0.129164	12.6638	701	0.047479	12.6665	701	0.071806	12.6278	701	0.011809	12.6226	701	0.006095	12.624
702	0.871017	12.6706	702	0.129739	12.6704	702	0.047729	12.6731	702	0.070956	12.6345	702	0.011865	12.6292	702	0.006114	12.6306
703	0.880492	12.6772	703	0.130332	12.6773	703	0.047954	12.6797	703	0.071011	12.6411	703	0.011906	12.6358	703	0.006093	12.6373
704	0.889623	12.6839	704	0.130937	12.6839	704	0.048186	12.6866	704	0.072121	12.648	704	0.011945	12.6425	704	0.006065	12.6439
705	0.898149	12.6905	705	0.131537	12.6906	705	0.04843	12.6933	705	0.073134	12.6546	705	0.012006	12.6494	705	0.006032	12.6508
706	0.906572	12.6971	706	0.132198	12.6972	706	0.048666	12.6999	706	0.074574	12.6613	706	0.012067	12.656	706	0.006005	12.6574
707	0.914696	12.7038	707	0.13287	12.7039	707	0.048913	12.7065	707	0.075589	12.6679	707	0.012102	12.6626	707	0.00605	12.6641
708	0.922502	12.7104	708	0.13353	12.7105	708	0.049184	12.7132	708	0.076013	12.6745	708	0.012151	12.6693	708	0.006046	12.6707
709	0.92962	12.7173	709	0.134226	12.7171	709	0.049458	12.7198	709	0.076779	12.6812	709	0.012185	12.6759	709	0.006084	12.6773
710	0.936547	12.7239	710	0.134948	12.7238	710	0.049707	12.7264	710	0.07739	12.6878	710	0.012227	12.6825	710	0.006158	12.684
711	0.943253	12.7305	711	0.135687	12.7307	711	0.049984	12.7331	711	0.077964	12.6944	711	0.012287	12.6892	711	0.006154	12.6906
712	0.949495	12.7372	712	0.136416	12.7373	712	0.050276	12.7399	712	0.079201	12.7013	712	0.012417	12.6958	712	0.00615	12.6972
713	0.955262	12.7438	713	0.137188	12.7439	713	0.05057	12.7466	713	0.0804	12.7079	713	0.012546	12.7027	713	0.006169	12.7041
714	0.960778	12.7505	714	0.137982	12.7506	714	0.050871	12.7532	714	0.080706	12.7146	714	0.012605	12.7093	714	0.006185	12.7107
715	0.965967	12.7571	715	0.138796	12.7572	715	0.051177	12.7599	715	0.080898	12.7212	715	0.012666	12.7159	715	0.006244	12.7174
716	0.970458	12.7637	716	0.139625	12.7638	716	0.051478	12.7665	716	0.080717	12.7278	716	0.012811	12.7226	716	0.006307	12.724
717	0.974811	12.7706	717	0.140476	12.7705	717	0.051795	12.7731	717	0.080654	12.7345	717	0.012951	12.7292	717	0.00634	12.7307
718	0.978867	12.7773	718	0.141353	12.7771	718	0.052101	12.7798	718	0.080153	12.7411	718	0.013079	12.7359	718	0.006383	12.7373
719	0.982497	12.7839	719	0.142225	12.784	719	0.052404	12.7864	719	0.079156	12.7477	719	0.013206	12.7425	719	0.006257	12.7439
720	0.985705	12.7905	720	0.143132	12.7906	720	0.052716	12.7933	720	0.079319	12.7546	720	0.013349	12.7491	720	0.006091	12.7506
721	0.98867	12.7972	721	0.144072	12.7972	721	0.053029	12.7999	721	0.080094	12.7613	721	0.013492	12.756	721	0.006122	12.7574
722	0.991324	12.8038	722	0.145037	12.8039	722	0.053355	12.8065	722	0.080151	12.7679	722	0.013581	12.7627	722	0.006232	12.7641
723	0.993645	12.8104	723	0.146015	12.8105	723	0.053688	12.8132	723	0.079757	12.7745	723	0.013682	12.7693	723	0.006298	12.7707
724	0.995604	12.8171	724	0.147022	12.8171	724	0.054022	12.8198	724	0.079552	12.7812	724	0.01387	12.7759	724	0.006296	12.7774
725	0.997277	12.8239	725	0.148063	12.8238	725	0.054365	12.8264	725	0.079753	12.7878	725	0.014072	12.7826	725	0.006273	12.784
726	0.998618	12.8306	726	0.149091	12.8304	726	0.05471	12.8331	726	0.079768	12.7944	726	0.014191	12.7892	726	0.006266	12.7906
727	0.999449	12.8372	727	0.150191	12.8373	727	0.05506	12.8397	727	0.079615	12.8011	727	0.014302	12.7958	727	0.006236	12.7973
728	0.999877	12.8438	728	0.151335	12.8439	728	0.055429	12.8466	728	0.080049	12.8079	728	0.014407	12.8025	728	0.006234	12.8039
729	1	12.8505	729	0.152499	12.8506	729	0.055828	12.8532	729	0.081252	12.8146	729	0.014519	12.8093	729	0.006299	12.8108
730	0.999812	12.8571	730	0.153675	12.8572	730	0.056247	12.8599	730	0.082059	12.8212	730	0.014589	12.816	730	0.006389	12.8174
731	0.999073	12.8638	731	0.154914	12.8638	731	0.056665	12.8665	731	0.082422	12.8279	731	0.014613	12.8226	731	0.006423	12.824
732	0.998011	12.8704	732	0.156153	12.8705	732	0.057071	12.8731	732	0.082924	12.8345	732	0.014627	12.8292	732	0.00645	12.8307
733	0.996657	12.8773	733	0.157369	12.8771	733	0.057514	12.8798	733	0.083724	12.8411	733	0.014648	12.8359	733	0.006533	12.8373
734	0.995075	12.8839	734	0.158664	12.8837	734	0.057975	12.8864	734	0.084423	12.8478	734	0.014666	12.8425	734	0.006616	12.844
735	0.993019	12.8906	735	0.159985	12.8906	735	0.058437	12.8931	735	0.084055	12.8544	735	0.014743	12.8491	735	0.006681	12.8506
736	0.990689	12.8972	736	0.161316	12.8972	736	0.058943	12.8999	736	0.08354	12.8613	736	0.014825	12.8558	736	0.006792	12.8572
737	0.988111	12.9038	737	0.162655	12.9039	737	0.059459	12.9066	737	0.083651	12.8679	737	0.014948	12.8627	737	0.006885	12.8641
738	0.985245	12.9105	738	0.164057	12.9105	738	0.059978	12.9132	738	0.083955	12.8746	738	0.015064	12.8693	738	0.006963	12.8708
739	0.981982	12.9171	739	0.165473	12.9172	739	0.060503	12.9198	739	0.083959	12.8812	739	0.01523	12.8759	739	0.007048	12.8774
740	0.978511	12.9238	740	0.166894	12.9238	740	0.061072	12.9265	740	0.08395	12.8878	740	0.015407	12.8826	740	0.007141	12.884
741	0.974926	12.9306	741	0.168364	12.9305	741	0.061658	12.9331	741	0.08386	12.8945	741	0.015648	12.8892	741	0.007223	12.8907
742	0.970822	12.9372	742	0.169917	12.9371	742	0.062272	12.9398	742	0.083778	12.9011	742	0.01589	12.8958	742	0.007294	12.8973
743	0.966361	12.9439	743	0.171524	12.944	743	0.062917	12.9464	743	0.083432	12.9077	743	0.016116	12.9025	743	0.007383	12.9039
744	0.961637	12.9505	744	0.173127	12.9506	744	0.063587	12.9533	744	0.082831	12.9146	744	0.016333	12.9091	744	0.007547	12.9106
745	0.956817	12.9571	745	0.174862	12.9572	745	0.064275	12.9599	745	0.082527	12.9212	745	0.016495	12.916	745	0.007712	12.9174
746	0.95138	12.9638	746	0.176618	12.9639	746	0.06495	12.9665	746	0.081772	12.9279	746	0.016665	12.9226	746	0.007805	12.9241
747	0.945711	12.9704	747	0.178361	12.9705	747	0.065711	12.9732	747	0.080511	12.9345	747	0.016785	12.9292	747	0.0079	12.9307
748	0.939994	12.9771	748	0.180169	12.9771	748	0.066508	12.9798	748	0.07918	12.9412	748	0.016895	12.9359	748	0.007966	12.9374
749	0.934056	12.9839	749	0.182054	12.9838	749	0.067337	12.9864	749	0.078053	12.9478	749	0.016955	12.9425	749	0.008032	12.944
750	0.927558	12.9906	750	0.183996	12.9904	750	0.068192	12.9931	750	0.077746	12.9544	750	0.017027	12.9492	750	0.008096	12.9506
751	0.920834	12.9972	751	0.185905	12.9973	751	0.069103	12.9997	751	0.077453	12.9611	751	0.017103	12.9558	751	0.008144	12.9573
752	0.914254	13.0038	752	0.187967	13.0039	752	0.070051	13.0066	752	0.077353	12.9679	752	0.01724	12.9625	752	0.008139	12.9639
753	0.907216	13.0105	753	0.190067	13.0106	753	0.071008	13.0132	753	0.07757	12.9746	753	0.017368	12.9693	753	0.008096	12.9708
754	0.899943	13.0171	754	0.192168	13.0172	754	0.072061	13.0198	754	0.078622	12.9812	754	0.017468	12.976	754	0.008042	12.9774
755	0.892539	13.0237	755	0.194271	13.0238	755	0.073168	13.0265	755	0.080077	12.9878	755	0.017551	12.9826	755	0.007955	12.984
756	0.885237	13.0304	756	0.196527	13.0305	756	0.07433	13.0331	756	0.081201	12.9945	756	0.017661	12.9892	756	0.00787	12.9907
757	0.877463	13.0373	757	0.19885	13.0371	757	0.075526	13.0398	757	0.082264	13.0011	757	0.017783	12.9959	757	0.007864	12.9973
758	0.86947	13.0439	758	0.201136	13.0437	758	0.076802	13.0464	758	0.082308	13.0078	758	0.01795	13.0025	758	0.007856	13.0039
759	0.861515	13.0505	759	0.203572	13.0506	759	0.078126	13.053	759	0.082097	13.0144	759	0.018108	13.0091	759	0.007679	13.0106
760	0.853373	13.0572	760	0.20609	13.0572	760	0.079483	13.0599	760	0.081186	13.0213	760	0.01835	13.0158	760	0.007502	13.0172
761	0.845058	13.0638	761	0.208677	13.0639	761	0.080972	13.0665	761	0.080273	13.0279	761	0.018561	13.0226	761	0.007394	13.0241
762	0.836542	13.0704	762	0.211239	13.0705	762	0.082561	13.0732	762	0.079842	13.0345	762	0.018724	13.0293	762	0.007302	13.0307
763	0.828161	13.0771	763	0.213955	13.0772	763	0.084218	13.0798	763	0.079887	13.0412	763	0.018897	13.0359	763	0.007194	13.0373
764	0.819322	13.0837	764	0.216758	13.0838	764	0.0859	13.0864	764	0.078764	13.0478	764	0.019124	13.0426	764	0.007077	13.044
765	0.810422	13.0906	765	0.219581	13.0904	765	0.087745	13.0931	765	0.077055	13.0544	765	0.019355	13.0492	765	0.007016	13.0506
766	0.8016	13.0972	766	0.222507	13.0971	766	0.089686	13.0997	766	0.076821	13.0611	766	0.019592	13.0558	766	0.006962	13.0573
767	0.792682	13.1039	767	0.225548	13.1039	767	0.091685	13.1064	767	0.077394	13.0677	767	0.019845	13.0625	767	0.006874	13.0639
768	0.783514	13.1105	768	0.228664	13.1106	768	0.093841	13.1132	768	0.078611	13.0746	768	0.020093	13.0691	768	0.006832	13.0706
769	0.774246	13.1172	769	0.231747	13.1172	769	0.096152	13.1199	769	0.07927	13.0812	769	0.020358	13.076	769	0.006986	13.0774
770	0.765279	13.1238	770	0.235068	13.1238	770	0.098538	13.1265	770	0.079851	13.0878	770	0.020534	13.0826	770	0.007195	13.0841
771	0.755841	13.1304	771	0.238448	13.1305	771	0.100996	13.1331	771	0.080544	13.0945	771	0.020711	13.0892	771	0.007361	13.0907
772	0.746391	13.1371	772	0.241831	13.1371	772	0.103652	13.1398	772	0.080468	13.1011	772	0.020879	13.0959	772	0.007539	13.0973
773	0.73696	13.1439	773	0.245291	13.1438	773	0.106427	13.1464	773	0.078916	13.1078	773	0.021055	13.1025	773	0.007755	13.104
774	0.727642	13.1506	774	0.248987	13.1504	774	0.109296	13.1531	774	0.077951	13.1144	774	0.021217	13.1092	774	0.007975	13.1106
775	0.717987	13.1572	775	0.252754	13.1573	775	0.112361	13.1597	775	0.07825	13.121	775	0.021404	13.1158	775	0.008157	13.1173
776	0.708289	13.1638	776	0.256486	13.1639	776	0.11559	13.1666	776	0.078024	13.1279	776	0.02156	13.1224	776	0.008176	13.1239
777	0.698894	13.1705	777	0.260413	13.1705	777	0.118962	13.1732	777	0.077322	13.1345	777	0.02174	13.1293	777	0.008149	13.1308
778	0.689326	13.1771	778	0.264471	13.1772	778	0.122445	13.1798	778	0.076921	13.1412	778	0.021883	13.1359	778	0.008134	13.1374
779	0.67969	13.1837	779	0.268589	13.1838	779	0.126223	13.1865	779	0.077551	13.1478	779	0.021963	13.1426	779	0.00809	13.144
780	0.670052	13.1904	780	0.272632	13.1905	780	0.130184	13.1931	780	0.078237	13.1545	780	0.022041	13.1492	780	0.007992	13.1507
781	0.66078	13.1972	781	0.276969	13.1971	781	0.134188	13.1997	781	0.078075	13.1611	781	0.022198	13.1558	781	0.007884	13.1573
782	0.65104	13.2039	782	0.281398	13.2037	782	0.13843	13.2064	782	0.077747	13.1677	782	0.022345	13.1625	782	0.007768	13.1639
783	0.641363	13.2105	783	0.285839	13.2106	783	0.142935	13.213	783	0.07833	13.1744	783	0.022502	13.1691	783	0.007655	13.1706
784	0.631941	13.2172	784	0.290361	13.2172	784	0.147598	13.2199	784	0.078897	13.1812	784	0.022646	13.1758	784	0.00758	13.1772
785	0.622458	13.2238	785	0.295071	13.2239	785	0.152331	13.2265	785	0.078883	13.1879	785	0.022768	13.1826	785	0.007527	13.1841
786	0.612797	13.2304	786	0.299869	13.2305	786	0.157478	13.2332	786	0.07896	13.1945	786	0.022882	13.1893	786	0.007722	13.1907
787	0.603313	13.2371	787	0.304612	13.2371	787	0.162805	13.2398	787	0.078837	13.2012	787	0.022924	13.1959	787	0.007981	13.1974
788	0.594187	13.2437	788	0.309661	13.2438	788	0.168242	13.2464	788	0.078829	13.2078	788	0.022962	13.2025	788	0.008112	13.204
789	0.58472	13.2506	789	0.314815	13.2504	789	0.173865	13.2531	789	0.078539	13.2144	789	0.023082	13.2092	789	0.008176	13.2106
790	0.575297	13.2572	790	0.320025	13.257	790	0.17985	13.2597	790	0.078349	13.2211	790	0.02322	13.2158	790	0.008261	13.2173
791	0.566008	13.2638	791	0.325283	13.2639	791	0.186042	13.2663	791	0.078838	13.2277	791	0.023276	13.2224	791	0.008366	13.2239
792	0.55694	13.2705	792	0.330849	13.2706	792	0.192254	13.2732	792	0.07949	13.2346	792	0.023336	13.2291	792	0.008456	13.2305
793	0.547741	13.2771	793	0.336504	13.2772	793	0.198996	13.2798	793	0.080211	13.2412	793	0.023408	13.2359	793	0.00853	13.2374
794	0.538598	13.2837	794	0.342064	13.2838	794	0.205965	13.2865	794	0.081223	13.2478	794	0.02352	13.2426	794	0.008584	13.244
795	0.529887	13.2904	795	0.34795	13.2905	795	0.21306	13.2931	795	0.082155	13.2545	795	0.023634	13.2492	795	0.008692	13.2507
796	0.521017	13.297	796	0.353915	13.2971	796	0.220347	13.2998	796	0.083354	13.2611	796	0.023764	13.2559	796	0.008702	13.2573
797	0.512096	13.3039	797	0.359955	13.3037	797	0.228077	13.3064	797	0.084422	13.2678	797	0.023934	13.2625	797	0.008794	13.2639
798	0.503291	13.3105	798	0.366026	13.3104	798	0.236043	13.313	798	0.085541	13.2744	798	0.024152	13.2691	798	0.008957	13.2706
799	0.494829	13.3172	799	0.372338	13.3172	799	0.243997	13.3197	799	0.086554	13.281	799	0.024326	13.2758	799	0.009129	13.2772
800	0.486162	13.3238	800	0.378752	13.3239	800	0.252471	13.3265	800	0.087333	13.2879	800	0.024416	13.2824	800	0.009286	13.2838
801	0.477594	13.3305	801	0.38513	13.3305	801	0.261233	13.3332	801	0.088133	13.2945	801	0.024507	13.2893	801	0.009398	13.2907
802	0.469323	13.3371	802	0.391684	13.3372	802	0.270185	13.3398	802	0.087836	13.3012	802	0.024734	13.2959	802	0.00951	13.2974
803	0.461052	13.3437	803	0.398414	13.3438	803	0.279169	13.3465	803	0.087121	13.3078	803	0.024928	13.3026	803	0.009581	13.304
804	0.452773	13.3504	804	0.405178	13.3504	804	0.288726	13.3531	804	0.087157	13.3145	804	0.025095	13.3092	804	0.009626	13.3106
805	0.444594	13.3572	805	0.411859	13.3571	805	0.298506	13.3597	805	0.087619	13.3211	805	0.025251	13.3158	805	0.009685	13.3173
806	0.436859	13.3638	806	0.418867	13.3637	806	0.308203	13.3664	806	0.086975	13.3277	806	0.025398	13.3225	806	0.009782	13.3239
807	0.428835	13.3705	807	0.425965	13.3706	807	0.318369	13.373	807	0.085882	13.3344	807	0.025537	13.3291	807	0.009676	13.3306
808	0.420923	13.3771	808	0.432926	13.3772	808	0.32886	13.3799	808	0.085449	13.3412	808	0.025651	13.3357	808	0.009524	13.3372
809	0.413213	13.3838	809	0.440126	13.3839	809	0.339543	13.3865	809	0.086038	13.3479	809	0.025775	13.3426	809	0.009494	13.344
810	0.405618	13.3904	810	0.447468	13.3905	810	0.350171	13.3931	810	0.086525	13.3545	810	0.025984	13.3492	810	0.009545	13.3507
811	0.398001	13.397	811	0.454874	13.3971	811	0.361433	13.3998	811	0.08679	13.3611	811	0.0262	13.3559	811	0.009574	13.3573
812	0.390547	13.4037	812	0.462181	13.4038	812	0.372927	13.4064	812	0.088033	13.3678	812	0.026271	13.3625	812	0.009481	13.364
813	0.383359	13.4106	813	0.469776	13.4104	813	0.384347	13.4131	813	0.089217	13.3744	813	0.026337	13.3692	813	0.009452	13.3706
814	0.376058	13.4172	814	0.477537	13.417	814	0.395951	13.4197	814	0.089458	13.3811	814	0.026421	13.3758	814	0.009465	13.3772
815	0.368817	13.4238	815	0.485199	13.4239	815	0.408033	13.4263	815	0.089776	13.3877	815	0.026544	13.3824	815	0.00941	13.3839
816	0.361729	13.4305	816	0.492933	13.4305	816	0.420296	13.4332	816	0.090744	13.3946	816	0.026666	13.3891	816	0.009369	13.3905
817	0.354843	13.4371	817	0.50091	13.4372	817	0.432238	13.4398	817	0.090861	13.4012	817	0.02681	13.3959	817	0.009395	13.3974
818	0.347961	13.4437	818	0.508967	13.4438	818	0.444885	13.4465	818	0.0901	13.4078	818	0.026943	13.4026	818	0.009619	13.404
819	0.341239	13.4504	819	0.516738	13.4505	819	0.457763	13.4531	819	0.088382	13.4145	819	0.027081	13.4092	819	0.009778	13.4107
820	0.334812	13.457	820	0.524915	13.4571	820	0.470618	13.4598	820	0.086816	13.4211	820	0.027196	13.4159	820	0.009799	13.4173
821	0.328304	13.4639	821	0.533143	13.4637	821	0.483441	13.4664	821	0.086127	13.4277	821	0.027308	13.4225	821	0.00987	13.4239
822	0.321871	13.4705	822	0.541314	13.4704	822	0.496748	13.473	822	0.085698	13.4344	822	0.027425	13.4291	822	0.009989	13.4306
823	0.315606	13.4771	823	0.549337	13.4772	823	0.510199	13.4797	823	0.085201	13.441	823	0.027573	13.4358	823	0.010095	13.4372
824	0.309501	13.4838	824	0.557674	13.4839	824	0.523413	13.4865	824	0.084526	13.4479	824	0.02769	13.4424	824	0.01017	13.4438
825	0.303387	13.4904	825	0.566012	13.4905	825	0.536931	13.4932	825	0.083654	13.4545	825	0.027811	13.4493	825	0.010233	13.4507
826	0.297378	13.4971	826	0.574125	13.4972	826	0.550716	13.4998	826	0.08299	13.4612	826	0.027928	13.4559	826	0.010229	13.4573
827	0.291629	13.5037	827	0.582441	13.5038	827	0.564514	13.5064	827	0.084144	13.4678	827	0.028032	13.4625	827	0.010205	13.464
828	0.285824	13.5103	828	0.590865	13.5104	828	0.577814	13.5131	828	0.085588	13.4744	828	0.028138	13.4692	828	0.01007	13.4706
829	0.280119	13.5172	829	0.599353	13.5171	829	0.591729	13.5197	829	0.087082	13.4811	829	0.028207	13.4758	829	0.009972	13.4773
830	0.274542	13.5238	830	0.607563	13.5237	830	0.605549	13.5263	830	0.088684	13.4877	830	0.028261	13.4825	830	0.00995	13.4839
831	0.269054	13.5305	831	0.616049	13.5306	831	0.619005	13.533	831	0.089964	13.4943	831	0.02834	13.4891	831	0.009949	13.4905
832	0.263571	13.5371	832	0.624567	13.5372	832	0.632547	13.5398	832	0.091575	13.5012	832	0.028444	13.4957	832	0.010048	13.4972
833	0.258149	13.5438	833	0.633041	13.5438	833	0.64635	13.5465	833	0.093464	13.5078	833	0.028525	13.5026	833	0.010196	13.504
834	0.252992	13.5504	834	0.641498	13.5505	834	0.660127	13.5531	834	0.094976	13.5145	834	0.028608	13.5092	834	0.010357	13.5107
835	0.247798	13.557	835	0.650217	13.5571	835	0.673332	13.5598	835	0.096222	13.5211	835	0.028658	13.5159	835	0.010534	13.5173
836	0.242661	13.5637	836	0.65899	13.5637	836	0.686931	13.5664	836	0.097541	13.5278	836	0.02872	13.5225	836	0.010721	13.5239
837	0.237693	13.5705	837	0.667362	13.5704	837	0.700595	13.573	837	0.098182	13.5344	837	0.028788	13.5291	837	0.010891	13.5306
838	0.232877	13.5772	838	0.67604	13.577	838	0.713989	13.5797	838	0.097802	13.541	838	0.028891	13.5358	838	0.011026	13.5372
839	0.228014	13.5838	839	0.684716	13.5839	839	0.726768	13.5863	839	0.097367	13.5477	839	0.02903	13.5424	839	0.011166	13.5439
840	0.223253	13.5904	840	0.693261	13.5905	840	0.739905	13.5932	840	0.097939	13.5545	840	0.029202	13.5491	840	0.011289	13.5505
841	0.218795	13.5971	841	0.701622	13.5972	841	0.752987	13.5998	841	0.098181	13.5612	841	0.029341	13.5559	841	0.011368	13.5574
842	0.214275	13.6037	842	0.710221	13.6038	842	0.765489	13.6065	842	0.097718	13.5678	842	0.029485	13.5626	842	0.011425	13.564
843	0.20983	13.6104	843	0.718731	13.6104	843	0.777912	13.6131	843	0.097463	13.5745	843	0.029625	13.5692	843	0.011359	13.5706
844	0.20551	13.617	844	0.726934	13.6171	844	0.790244	13.6197	844	0.097888	13.5811	844	0.029676	13.5758	844	0.011283	13.5773
845	0.201371	13.6239	845	0.735196	13.6237	845	0.802402	13.6264	845	0.098281	13.5877	845	0.029715	13.5825	845	0.011277	13.5839
846	0.197186	13.6305	846	0.743563	13.6303	846	0.813793	13.633	846	0.097898	13.5944	846	0.029827	13.5891	846	0.011292	13.5906
847	0.193076	13.6372	847	0.751891	13.6372	847	0.825441	13.6396	847	0.097565	13.601	847	0.029929	13.5957	847	0.011407	13.5972
848	0.189165	13.6438	848	0.759841	13.6438	848	0.836839	13.6465	848	0.098301	13.6079	848	0.029949	13.6024	848	0.01154	13.6038
849	0.185257	13.6504	849	0.768113	13.6505	849	0.847813	13.6531	849	0.099072	13.6145	849	0.029951	13.6092	849	0.011621	13.6107
850	0.181368	13.6571	850	0.776365	13.6571	850	0.858411	13.6598	850	0.098927	13.6211	850	0.030029	13.6159	850	0.011695	13.6173
851	0.177589	13.6637	851	0.784391	13.6638	851	0.868971	13.6664	851	0.09886	13.6278	851	0.030135	13.6225	851	0.011838	13.624
852	0.174007	13.6703	852	0.792238	13.6704	852	0.879127	13.673	852	0.09907	13.6344	852	0.030198	13.6291	852	0.012019	13.6306
853	0.170379	13.6772	853	0.800119	13.677	853	0.888621	13.6797	853	0.099273	13.6411	853	0.030256	13.6358	853	0.012261	13.6372
854	0.166817	13.6838	854	0.807882	13.6837	854	0.898038	13.6863	854	0.099627	13.6477	854	0.030413	13.6424	854	0.012483	13.6439
855	0.16343	13.6905	855	0.815316	13.6906	855	0.907195	13.693	855	0.100178	13.6543	855	0.030582	13.6491	855	0.012603	13.6505
856	0.160053	13.6971	856	0.822846	13.6972	856	0.915946	13.6998	856	0.101148	13.6612	856	0.030648	13.6557	856	0.012671	13.6572
857	0.156724	13.7037	857	0.830353	13.7038	857	0.923867	13.7065	857	0.102081	13.6678	857	0.030694	13.6626	857	0.012654	13.664
858	0.153453	13.7104	858	0.837741	13.7105	858	0.93173	13.7131	858	0.102982	13.6745	858	0.030785	13.6692	858	0.012571	13.6707
859	0.150335	13.717	859	0.844863	13.7171	859	0.93928	13.7197	859	0.104166	13.6811	859	0.030886	13.6758	859	0.012505	13.6773
860	0.147223	13.7236	860	0.851975	13.7238	860	0.946167	13.7264	860	0.104812	13.6878	860	0.030897	13.6825	860	0.012493	13.6839
861	0.144157	13.7305	861	0.859075	13.7304	861	0.952677	13.733	861	0.104827	13.6944	861	0.030893	13.6891	861	0.012434	13.6906
862	0.141195	13.7372	862	0.865909	13.737	862	0.958894	13.7396	862	0.104823	13.701	862	0.030903	13.6958	862	0.012302	13.6972
863	0.138294	13.7438	863	0.872855	13.7439	863	0.964719	13.7463	863	0.104706	13.7077	863	0.03092	13.7024	863	0.012189	13.7038
864	0.135415	13.7504	864	0.879762	13.7505	864	0.969919	13.7532	864	0.104325	13.7145	864	0.030925	13.709	864	0.012253	13.7105
865	0.132568	13.7571	865	0.886496	13.7571	865	0.974864	13.7598	865	0.104062	13.7212	865	0.03093	13.7159	865	0.01234	13.7173
866	0.129905	13.7637	866	0.892858	13.7638	866	0.979417	13.7664	866	0.103869	13.7278	866	0.030954	13.7226	866	0.012477	13.724
867	0.127211	13.7704	867	0.89922	13.7704	867	0.983499	13.7731	867	0.103018	13.7345	867	0.031082	13.7292	867	0.012627	13.7306
868	0.124566	13.777	868	0.905421	13.7771	868	0.987087	13.7797	868	0.101875	13.7411	868	0.031211	13.7358	868	0.012881	13.7373
869	0.122039	13.7838	869	0.911232	13.7837	869	0.990312	13.7864	869	0.100591	13.7477	869	0.0313	13.7425	869	0.013138	13.7439
870	0.119572	13.7905	870	0.91706	13.7903	870	0.993165	13.793	870	0.099645	13.7544	870	0.031381	13.7491	870	0.013251	13.7505
871	0.117091	13.7971	871	0.922768	13.7972	871	0.995438	13.7996	871	0.098848	13.761	871	0.031491	13.7557	871	0.013343	13.7572
872	0.114668	13.8038	872	0.928321	13.8038	872	0.997262	13.8065	872	0.098114	13.7679	872	0.031609	13.7624	872	0.0134	13.7638
873	0.112415	13.8104	873	0.933504	13.8105	873	0.998686	13.8131	873	0.097774	13.7745	873	0.031712	13.7692	873	0.013429	13.7707
874	0.110134	13.8171	874	0.938631	13.8171	874	0.999636	13.8198	874	0.097375	13.7811	874	0.03181	13.7759	874	0.013368	13.7773
875	0.107898	13.8237	875	0.943589	13.8238	875	1	13.8264	875	0.097259	13.7878	875	0.031953	13.7825	875	0.013355	13.7839
876	0.105735	13.8303	876	0.948294	13.8304	876	0.999902	13.833	876	0.097387	13.7944	876	0.032111	13.7891	876	0.01336	13.7906
877	0.103665	13.8372	877	0.95291	13.837	877	0.999429	13.8397	877	0.097695	13.801	877	0.032185	13.7958	877	0.013399	13.7972
878	0.101571	13.8438	878	0.957322	13.8437	878	0.998539	13.8463	878	0.097719	13.8077	878	0.032262	13.8024	878	0.013383	13.8039
879	0.099514	13.8505	879	0.961606	13.8505	879	0.997123	13.8529	879	0.09783	13.8143	879	0.032425	13.8091	879	0.013371	13.8105
880	0.097553	13.8571	880	0.965582	13.8572	880	0.995289	13.8598	880	0.098147	13.8212	880	0.032627	13.8157	880	0.013457	13.8171
881	0.095641	13.8637	881	0.969415	13.8638	881	0.993058	13.8665	881	0.099423	13.8278	881	0.032776	13.8226	881	0.013573	13.824
882	0.093748	13.8704	882	0.973084	13.8704	882	0.990433	13.8731	882	0.101304	13.8345	882	0.032908	13.8292	882	0.013753	13.8306
883	0.091895	13.877	883	0.976504	13.8771	883	0.987315	13.8797	883	0.102898	13.8411	883	0.03306	13.8358	883	0.013945	13.8373
884	0.090147	13.8836	884	0.979667	13.8837	884	0.983831	13.8864	884	0.104426	13.8477	884	0.033228	13.8425	884	0.014093	13.8439
885	0.088386	13.8905	885	0.982697	13.8904	885	0.980028	13.893	885	0.105117	13.8544	885	0.033342	13.8491	885	0.014308	13.8506
886	0.086656	13.8971	886	0.985562	13.897	886	0.975739	13.8996	886	0.105233	13.861	886	0.033438	13.8558	886	0.014484	13.8572
887	0.085002	13.9038	887	0.98808	13.9039	887	0.970953	13.9063	887	0.106048	13.8676	887	0.033525	13.8624	887	0.014529	13.8638
888	0.083386	13.9104	888	0.990409	13.9105	888	0.965729	13.9131	888	0.107337	13.8745	888	0.033602	13.869	888	0.014567	13.8705
889	0.081795	13.917	889	0.992533	13.9171	889	0.960351	13.9198	889	0.108507	13.8811	889	0.033644	13.8759	889	0.014639	13.8773
890	0.080251	13.9237	890	0.994325	13.9238	890	0.954442	13.9264	890	0.110326	13.8878	890	0.033679	13.8825	890	0.014712	13.884
891	0.078771	13.9303	891	0.995822	13.9304	891	0.948231	13.933	891	0.111544	13.8944	891	0.033723	13.8892	891	0.014741	13.8906
892	0.077305	13.937	892	0.997109	13.9371	892	0.941857	13.9397	892	0.111923	13.9011	892	0.033795	13.8958	892	0.014767	13.8972
893	0.075869	13.9438	893	0.998168	13.9437	893	0.934869	13.9463	893	0.112319	13.9077	893	0.033862	13.9024	893	0.014836	13.9039
894	0.074486	13.9505	894	0.99899	13.9503	894	0.927494	13.953	894	0.112676	13.9143	894	0.03396	13.9091	894	0.014895	13.9105
895	0.073129	13.9571	895	0.999586	13.9572	895	0.919805	13.9596	895	0.113242	13.921	895	0.034057	13.9157	895	0.014791	13.9172
896	0.071794	13.9637	896	0.999939	13.9638	896	0.912019	13.9665	896	0.113841	13.9278	896	0.034165	13.9223	896	0.014668	13.9238
897	0.070486	13.9704	897	1	13.9705	897	0.903786	13.9731	897	0.114367	13.9345	897	0.034276	13.9292	897	0.01472	13.9307
898	0.069267	13.977	898	0.99982	13.9771	898	0.895406	13.9798	898	0.114978	13.9411	898	0.034406	13.9359	898	0.014835	13.9373
899	0.068035	13.9837	899	0.999423	13.9838	899	0.886716	13.9864	899	0.115394	13.9477	899	0.034529	13.9425	899	0.014905	13.9439
900	0.066824	13.9903	900	0.998811	13.9904	900	0.877736	13.993	900	0.114133	13.9544	900	0.034592	13.9491	900	0.014977	13.9506
901	0.065675	13.9972	901	0.997985	13.997	901	0.868262	13.9997	901	0.11276	13.961	901	0.034643	13.9558	901	0.015095	13.9572
902	0.064539	14.0038	902	0.996856	14.0036	902	0.858487	14.0063	902	0.111714	13.9677	902	0.034702	13.9624	902	0.015234	13.9639
903	0.063419	14.0104	903	0.995517	14.0105	903	0.84896	14.013	903	0.110699	13.9743	903	0.034769	13.969	903	0.015353	13.9705
904	0.06232	14.0171	904	0.993995	14.0172	904	0.838797	14.0198	904	0.110264	13.9812	904	0.034866	13.9757	904	0.015483	13.9771
905	0.061292	14.0237	905	0.99221	14.0238	905	0.828479	14.0265	905	0.110076	13.9878	905	0.034997	13.9825	905	0.015672	13.984
906	0.060261	14.0303	906	0.990065	14.0304	906	0.818033	14.0331	906	0.110527	13.9944	906	0.035109	13.9892	906	0.015938	13.9906
907	0.059253	14.037	907	0.987699	14.0371	907	0.807493	14.0397	907	0.111146	14.0011	907	0.035216	13.9958	907	0.016135	13.9973
908	0.058272	14.0436	908	0.98525	14.0437	908	0.796377	14.0464	908	0.111425	14.0077	908	0.035336	14.0024	908	0.01635	14.0039
909	0.057346	14.0505	909	0.982488	14.0503	909	0.785192	14.053	909	0.111632	14.0144	909	0.035478	14.0091	909	0.016561	14.0105
910	0.056421	14.0571	910	0.979476	14.057	910	0.774192	14.0596	910	0.112599	14.021	910	0.035672	14.0157	910	0.016778	14.0172
911	0.055501	14.0638	911	0.976279	14.0638	911	0.762824	14.0663	911	0.113636	14.0276	911	0.035902	14.0223	911	0.016987	14.0238
912	0.054649	14.0704	912	0.972869	14.0705	912	0.751235	14.0731	912	0.114474	14.0345	912	0.036077	14.029	912	0.01722	14.0304
913	0.053793	14.077	913	0.969115	14.0771	913	0.739526	14.0798	913	0.114984	14.0411	913	0.036198	14.0358	913	0.017448	14.0373
914	0.052953	14.0837	914	0.965187	14.0838	914	0.728104	14.0864	914	0.115136	14.0478	914	0.036255	14.0425	914	0.017627	14.044
915	0.052145	14.0903	915	0.961158	14.0904	915	0.716044	14.093	915	0.115988	14.0544	915	0.036296	14.0491	915	0.017786	14.0506
916	0.051388	14.0969	916	0.956926	14.097	916	0.703897	14.0997	916	0.116588	14.061	916	0.036352	14.0558	916	0.017801	14.0572
917	0.050606	14.1038	917	0.952477	14.1037	917	0.691985	14.1063	917	0.117089	14.0677	917	0.036473	14.0624	917	0.017772	14.0639
918	0.049844	14.1105	918	0.947833	14.1103	918	0.679893	14.113	918	0.117638	14.0743	918	0.03657	14.069	918	0.017697	14.0705
919	0.049121	14.1171	919	0.943162	14.1172	919	0.66753	14.1196	919	0.117879	14.081	919	0.036707	14.0757	919	0.017641	14.0771
920	0.048409	14.1237	920	0.938147	14.1238	920	0.655109	14.1265	920	0.118159	14.0878	920	0.036824	14.0823	920	0.017559	14.0838
921	0.047711	14.1304	921	0.933033	14.1304	921	0.643006	14.1331	921	0.118311	14.0945	921	0.036931	14.0892	921	0.017467	14.0906
922	0.047039	14.137	922	0.927927	14.1371	922	0.630482	14.1397	922	0.118539	14.1011	922	0.037068	14.0958	922	0.01742	14.0973
923	0.04639	14.1436	923	0.922657	14.1437	923	0.618007	14.1464	923	0.118053	14.1077	923	0.037194	14.1024	923	0.017461	14.1039
924	0.045745	14.1503	924	0.917107	14.1504	924	0.605744	14.153	924	0.117219	14.1144	924	0.037303	14.1091	924	0.017536	14.1105
925	0.045112	14.1571	925	0.911434	14.157	925	0.593412	14.1597	925	0.116276	14.121	925	0.037419	14.1157	925	0.017619	14.1172
926	0.044492	14.1638	926	0.905844	14.1636	926	0.581	14.1663	926	0.115594	14.1276	926	0.037531	14.1224	926	0.01781	14.1238
927	0.043908	14.1704	927	0.89988	14.1705	927	0.568614	14.1729	927	0.115391	14.1343	927	0.037586	14.129	927	0.018069	14.1305
928	0.04333	14.1771	928	0.893769	14.1771	928	0.556618	14.1798	928	0.115524	14.1412	928	0.037641	14.1357	928	0.018281	14.1371
929	0.042759	14.1837	929	0.887565	14.1838	929	0.544294	14.1864	929	0.115622	14.1478	929	0.037682	14.1425	929	0.018393	14.144
930	0.042212	14.1903	930	0.881371	14.1904	930	0.531967	14.1931	930	0.115455	14.1544	930	0.037768	14.1492	930	0.018523	14.1506
931	0.041668	14.197	931	0.874881	14.1971	931	0.519943	14.1997	931	0.11589	14.1611	931	0.037848	14.1558	931	0.018811	14.1572
932	0.041128	14.2036	932	0.86826	14.2037	932	0.508048	14.2064	932	0.116845	14.1677	932	0.037939	14.1624	932	0.019015	14.1639
933	0.040624	14.2105	933	0.861759	14.2103	933	0.496018	14.213	933	0.118412	14.1744	933	0.038107	14.1691	933	0.01914	14.1705
934	0.040116	14.2171	934	0.854994	14.217	934	0.484001	14.2196	934	0.119124	14.181	934	0.038317	14.1757	934	0.019263	14.1772
935	0.03962	14.2238	935	0.848094	14.2238	935	0.472742	14.2263	935	0.119112	14.1876	935	0.03851	14.1824	935	0.019434	14.1838
936	0.039139	14.2304	936	0.841129	14.2305	936	0.46119	14.2331	936	0.119213	14.1945	936	0.038713	14.189	936	0.019609	14.1904
937	0.038677	14.237	937	0.834254	14.2371	937	0.449692	14.2398	937	0.118941	14.2011	937	0.038924	14.1959	937	0.019742	14.1973
938	0.03821	14.2437	938	0.827124	14.2438	938	0.438393	14.2464	938	0.119259	14.2078	938	0.039169	14.2025	938	0.019884	14.2039
939	0.037752	14.2503	939	0.819915	14.2504	939	0.427487	14.253	939	0.120001	14.2144	939	0.039361	14.2091	939	0.020103	14.2106
940	0.037314	14.2569	940	0.812818	14.257	940	0.416418	14.2597	940	0.121669	14.221	940	0.0395	14.2158	940	0.020315	14.2172
941	0.036887	14.2638	941	0.805575	14.2637	941	0.405452	14.2663	941	0.122951	14.2277	941	0.039639	14.2224	941	0.02042	14.2239
942	0.036452	14.2704	942	0.798243	14.2703	942	0.395024	14.2729	942	0.123769	14.2343	942	0.039843	14.229	942	0.020556	14.2305
943	0.036022	14.2771	943	0.790847	14.2772	943	0.384441	14.2796	943	0.124995	14.2409	943	0.04002	14.2357	943	0.020678	14.2371
944	0.035627	14.2837	944	0.78362	14.2838	944	0.374018	14.2865	944	0.126868	14.2478	944	0.040126	14.2423	944	0.020795	14.2438
945	0.035224	14.2904	945	0.776125	14.2904	945	0.363714	14.2931	945	0.128591	14.2544	945	0.040225	14.2492	945	0.020827	14.2506
946	0.034831	14.297	946	0.768571	14.2971	946	0.353808	14.2997	946	0.12985	14.2611	946	0.040308	14.2558	946	0.020791	14.2573
947	0.034456	14.3036	947	0.761184	14.3037	947	0.343813	14.3064	947	0.130919	14.2677	947	0.040379	14.2625	947	0.020788	14.2639
948	0.034095	14.3103	948	0.753723	14.3103	948	0.333979	14.313	948	0.131085	14.2744	948	0.040475	14.2691	948	0.020858	14.2705
949	0.03373	14.3171	949	0.746125	14.317	949	0.32459	14.3196	949	0.131231	14.281	949	0.040576	14.2757	949	0.020935	14.2772
950	0.03337	14.3238	950	0.738433	14.3236	950	0.315345	14.3263	950	0.130071	14.2876	950	0.040723	14.2824	950	0.021028	14.2838
951	0.033028	14.3304	951	0.73094	14.3305	951	0.306118	14.3329	951	0.128534	14.2943	951	0.040867	14.289	951	0.02109	14.2904
952	0.032692	14.337	952	0.723103	14.3371	952	0.297087	14.3398	952	0.127164	14.3011	952	0.040974	14.2957	952	0.02126	14.2971
953	0.03236	14.3437	953	0.715301	14.3438	953	0.288598	14.3464	953	0.125944	14.3078	953	0.041094	14.3025	953	0.021435	14.304
954	0.032034	14.3503	954	0.70763	14.3504	954	0.279934	14.3531	954	0.125525	14.3144	954	0.04124	14.3092	954	0.021679	14.3106
955	0.031722	14.357	955	0.699891	14.357	955	0.271443	14.3597	955	0.125582	14.321	955	0.041379	14.3158	955	0.021956	14.3172
956	0.031402	14.3636	956	0.692098	14.3637	956	0.2634	14.3663	956	0.125889	14.3277	956	0.041553	14.3224	956	0.022255	14.3239
957	0.031085	14.3705	957	0.684336	14.3703	957	0.255521	14.373	957	0.126475	14.3343	957	0.04175	14.3291	957	0.022524	14.3305
958	0.030785	14.3771	958	0.676729	14.3769	958	0.247796	14.3796	958	0.127077	14.3409	958	0.041911	14.3357	958	0.022762	14.3371
959	0.030491	14.3837	959	0.668899	14.3838	959	0.240203	14.3862	959	0.127796	14.3476	959	0.042088	14.3423	959	0.02301	14.3438
960	0.030196	14.3904	960	0.66112	14.3904	960	0.232966	14.3931	960	0.129065	14.3545	960	0.042185	14.349	960	0.023286	14.3504
961	0.029904	14.397	961	0.653358	14.3971	961	0.225771	14.3997	961	0.129627	14.3611	961	0.042224	14.3558	961	0.023573	14.3573
962	0.029634	14.4037	962	0.645739	14.4037	962	0.21878	14.4064	962	0.129995	14.3677	962	0.04225	14.3625	962	0.023717	14.3639
963	0.029361	14.4103	963	0.637892	14.4104	963	0.212078	14.413	963	0.130156	14.3744	963	0.042302	14.3691	963	0.023858	14.3706
964	0.02909	14.4169	964	0.630016	14.417	964	0.205579	14.4197	964	0.129915	14.381	964	0.042384	14.3758	964	0.023913	14.3772
965	0.028827	14.4238	965	0.622437	14.4236	965	0.199208	14.4263	965	0.12943	14.3877	965	0.04251	14.3824	965	0.023947	14.3838
966	0.028564	14.4304	966	0.614567	14.4303	966	0.192965	14.4329	966	0.12882	14.3943	966	0.042606	14.389	966	0.024006	14.3905
967	0.028303	14.4371	967	0.606623	14.4372	967	0.187022	14.4396	967	0.128069	14.4009	967	0.042707	14.3956	967	0.024063	14.3971
968	0.02804	14.4437	968	0.598842	14.4438	968	0.181126	14.4464	968	0.127331	14.4078	968	0.042786	14.4023	968	0.024103	14.4038
969	0.027785	14.4504	969	0.591261	14.4504	969	0.175397	14.4531	969	0.127023	14.4144	969	0.042884	14.4092	969	0.024186	14.4106
970	0.027532	14.457	970	0.583427	14.4571	970	0.169984	14.4597	970	0.127174	14.4211	970	0.043025	14.4158	970	0.024239	14.4172
971	0.027279	14.4636	971	0.575646	14.4637	971	0.164709	14.4663	971	0.128577	14.4277	971	0.043288	14.4224	971	0.024372	14.4239
972	0.02703	14.4702	972	0.568116	14.4703	972	0.159544	14.473	972	0.130148	14.4344	972	0.043528	14.4291	972	0.024509	14.4305
973	0.026798	14.4771	973	0.560468	14.477	973	0.154477	14.4796	973	0.13184	14.441	973	0.043805	14.4357	973	0.024603	14.4372
974	0.026556	14.4838	974	0.552776	14.4836	974	0.149778	14.4863	974	0.13362	14.4476	974	0.04408	14.4424	974	0.024716	14.4438
975	0.026319	14.4904	975	0.545168	14.4905	975	0.145087	14.4929	975	0.13533	14.4543	975	0.044361	14.449	975	0.024919	14.4504
976	0.026096	14.497	976	0.53784	14.4971	976	0.140554	14.4998	976	0.137251	14.4611	976	0.044652	14.4556	976	0.025134	14.4571
977	0.025872	14.5037	977	0.530312	14.5038	977	0.13627	14.5064	977	0.139036	14.4678	977	0.044922	14.4625	977	0.025424	14.4639
978	0.025648	14.5103	978	0.522801	14.5104	978	0.132103	14.513	978	0.140727	14.4744	978	0.045193	14.4691	978	0.025706	14.4706
979	0.025427	14.5169	979	0.515502	14.517	979	0.128037	14.5197	979	0.141772	14.481	979	0.045477	14.4758	979	0.025954	14.4772
980	0.025212	14.5236	980	0.508199	14.5236	980	0.124085	14.5263	980	0.142006	14.4877	980	0.045795	14.4824	980	0.026198	14.4839
981	0.025	14.5304	981	0.500882	14.5303	981	0.120453	14.5329	981	0.142071	14.4943	981	0.046048	14.4891	981	0.026289	14.4905
982	0.024791	14.5371	982	0.493584	14.5369	982	0.116811	14.5396	982	0.141732	14.5009	982	0.046302	14.4957	982	0.026346	14.4971
983	0.024583	14.5437	983	0.486532	14.5438	983	0.11329	14.5462	983	0.141331	14.5076	983	0.04649	14.5023	983	0.026458	14.5038
984	0.024389	14.5503	984	0.479361	14.5504	984	0.109933	14.5531	984	0.140901	14.5145	984	0.046674	14.509	984	0.026579	14.5104
985	0.024187	14.557	985	0.472181	14.5571	985	0.106784	14.5597	985	0.140359	14.5211	985	0.04681	14.5158	985	0.026678	14.5173
986	0.023983	14.5636	986	0.465138	14.5637	986	0.103645	14.5664	986	0.140195	14.5277	986	0.046923	14.5225	986	0.026834	14.5239
987	0.023784	14.5703	987	0.458121	14.5703	987	0.10059	14.573	987	0.140165	14.5344	987	0.047043	14.5291	987	0.02693	14.5305
988	0.023587	14.5769	988	0.451	14.577	988	0.097774	14.5796	988	0.140841	14.541	988	0.047196	14.5357	988	0.027044	14.5372
989	0.02339	14.5838	989	0.443892	14.5836	989	0.095035	14.5863	989	0.141865	14.5476	989	0.047304	14.5424	989	0.027135	14.5438
990	0.023197	14.5904	990	0.437151	14.5903	990	0.092332	14.5929	990	0.143533	14.5543	990	0.047402	14.549	990	0.027204	14.5504
991	0.023009	14.5971	991	0.430128	14.5971	991	0.089714	14.5995	991	0.145307	14.5609	991	0.047497	14.5556	991	0.027325	14.5571
992	0.022813	14.6037	992	0.423191	14.6037	992	0.087334	14.6064	992	0.147269	14.5678	992	0.04765	14.5623	992	0.027606	14.5637
993	0.022617	14.6103	993	0.416417	14.6104	993	0.084915	14.613	993	0.149189	14.5744	993	0.047794	14.5692	993	0.027878	14.5706
994	0.022426	14.617	994	0.40979	14.617	994	0.082583	14.6197	994	0.150949	14.581	994	0.047998	14.5758	994	0.028165	14.5772
995	0.022239	14.6236	995	0.403003	14.6237	995	0.080371	14.6263	995	0.152566	14.5877	995	0.048214	14.5824	995	0.028409	14.5839
996	0.022058	14.6303	996	0.396285	14.6303	996	0.07829	14.633	996	0.153681	14.5943	996	0.04844	14.5891	996	0.028649	14.5905
997	0.021881	14.6371	997	0.389924	14.637	997	0.07623	14.6396	997	0.154941	14.601	997	0.048653	14.5957	997	0.028894	14.5971
998	0.021705	14.6437	998	0.383438	14.6436	998	0.074246	14.6462	998	0.155521	14.6076	998	0.048826	14.6023	998	0.029195	14.6038
999	0.021529	14.6504	999	0.376978	14.6505	999	0.072382	14.6529	999	0.155792	14.6142	999	0.048994	14.609	999	0.02954	14.6104
1000	0.021359	14.657	1000	0.370516	14.6571	1000	0.070578	14.6597	1000	0.155854	14.6211	1000	0.049192	14.6156	1000	0.029877	14.6171
1001	0.02119	14.6637	1001	0.364397	14.6637	1001	0.068829	14.6664	1001	0.155665	14.6277	1001	0.049405	14.6225	1001	0.030199	14.6239
1002	0.021011	14.6703	1002	0.35812	14.6704	1002	0.067137	14.673	1002	0.155536	14.6344	1002	0.0496	14.6291	1002	0.030369	14.6305
1003	0.020838	14.6769	1003	0.351886	14.677	1003	0.065582	14.6797	1003	0.156181	14.641	1003	0.049816	14.6357	1003	0.030518	14.6372
1004	0.020668	14.6836	1004	0.345843	14.6837	1004	0.064043	14.6863	1004	0.156926	14.6476	1004	0.049999	14.6424	1004	0.03077	14.6438
1005	0.020501	14.6904	1005	0.339877	14.6903	1005	0.062555	14.6929	1005	0.157801	14.6543	1005	0.050198	14.649	1005	0.031146	14.6505
1006	0.020325	14.6971	1006	0.333838	14.6969	1006	0.061132	14.6996	1006	0.158552	14.6609	1006	0.050396	14.6556	1006	0.031469	14.6571
1007	0.020151	14.7037	1007	0.32782	14.7038	1007	0.059759	14.7062	1007	0.158794	14.6675	1007	0.050597	14.6623	1007	0.031793	14.6637
1008	0.019985	14.7103	1008	0.322139	14.7104	1008	0.058431	14.7131	1008	0.159038	14.6744	1008	0.050847	14.6689	1008	0.032031	14.6704
1009	0.019821	14.717	1009	0.316291	14.7171	1009	0.057157	14.7197	1009	0.159723	14.6811	1009	0.051169	14.6758	1009	0.032233	14.6773
1010	0.019651	14.7236	1010	0.310537	14.7237	1010	0.055973	14.7264	1010	0.160521	14.6877	1010	0.051457	14.6824	1010	0.03246	14.6839
1011	0.019483	14.7303	1011	0.304914	14.7303	1011	0.054794	14.733	1011	0.16096	14.6943	1011	0.051769	14.6891	1011	0.032707	14.6905
1012	0.019334	14.7369	1012	0.299443	14.737	1012	0.053656	14.7396	1012	0.161241	14.701	1012	0.052049	14.6957	1012	0.032998	14.6972
1013	0.019172	14.7438	1013	0.293899	14.7436	1013	0.05259	14.7463	1013	0.161391	14.7076	1013	0.052333	14.7023	1013	0.033433	14.7038
1014	0.019009	14.7504	1014	0.288413	14.7502	1014	0.051555	14.7529	1014	0.161824	14.7142	1014	0.0526	14.709	1014	0.033745	14.7104
1015	0.018857	14.757	1015	0.283151	14.7571	1015	0.050538	14.7596	1015	0.162149	14.7209	1015	0.052902	14.7156	1015	0.033996	14.7171
1016	0.018709	14.7637	1016	0.27787	14.7637	1016	0.04956	14.7664	1016	0.162392	14.7277	1016	0.053204	14.7223	1016	0.034236	14.7237
1017	0.018558	14.7703	1017	0.272621	14.7704	1017	0.048654	14.773	1017	0.163433	14.7344	1017	0.053522	14.7291	1017	0.034374	14.7306
1018	0.018405	14.7769	1018	0.26747	14.777	1018	0.047749	14.7797	1018	0.165002	14.741	1018	0.053793	14.7358	1018	0.034503	14.7372
1019	0.018254	14.7836	1019	0.262502	14.7837	1019	0.046869	14.7863	1019	0.166159	14.7477	1019	0.054059	14.7424	1019	0.03479	14.7438
1020	0.018108	14.7902	1020	0.257446	14.7903	1020	0.04603	14.793	1020	0.167205	14.7543	1020	0.054303	14.749	1020	0.035102	14.7505
1021	0.017958	14.7971	1021	0.252476	14.7969	1021	0.04525	14.7996	1021	0.168852	14.7609	1021	0.05457	14.7557	1021	0.035477	14.7571
1022	0.017807	14.8037	1022	0.247676	14.8036	1022	0.044484	14.8062	1022	0.170913	14.7676	1022	0.05483	14.7623	1022	0.035864	14.7638
1023	0.017665	14.8104	1023	0.24286	14.8104	1023	0.043742	14.8128	1023	0.172264	14.7742	1023	0.055081	14.769	1023	0.036146	14.7704
1024	0.017519	14.817	1024	0.238085	14.8171	1024	0.043056	14.8197	1024	0.172512	14.7811	1024	0.055315	14.7756	1024	0.036437	14.777
1025	0.017371	14.8236	1025	0.233411	14.8237	1025	0.042402	14.8264	1025	0.172906	14.7877	1025	0.055507	14.7825	1025	0.03668	14.7839
1026	0.017226	14.8303	1026	0.228954	14.8303	1026	0.041768	14.833	1026	0.174147	14.7944	1026	0.055699	14.7891	1026	0.036937	14.7905
1027	0.017077	14.8369	1027	0.224424	14.837	1027	0.041164	14.8396	1027	0.174834	14.801	1027	0.055908	14.7957	1027	0.03731	14.7972
1028	0.016935	14.8436	1028	0.219955	14.8436	1028	0.040587	14.8463	1028	0.173582	14.8076	1028	0.05613	14.8024	1028	0.037726	14.8038
1029	0.0168	14.8504	1029	0.215708	14.8503	1029	0.040016	14.8529	1029	0.172258	14.8143	1029	0.056296	14.809	1029	0.038	14.8104
1030	0.016665	14.857	1030	0.211537	14.8569	1030	0.039465	14.8596	1030	0.172281	14.8209	1030	0.056464	14.8156	1030	0.038285	14.8171
1031	0.016525	14.8637	1031	0.207304	14.8638	1031	0.038947	14.8662	1031	0.172387	14.8275	1031	0.056614	14.8223	1031	0.038566	14.8237
1032	0.016388	14.8703	1032	0.203117	14.8704	1032	0.038433	14.873	1032	0.172218	14.8344	1032	0.056828	14.8289	1032	0.038952	14.8304
1033	0.016257	14.877	1033	0.199234	14.877	1033	0.037947	14.8797	1033	0.172158	14.841	1033	0.057023	14.8358	1033	0.039329	14.8372
1034	0.016129	14.8836	1034	0.195244	14.8837	1034	0.037484	14.8863	1034	0.172837	14.8477	1034	0.057216	14.8424	1034	0.039723	14.8439
1035	0.015997	14.8902	1035	0.191296	14.8903	1035	0.037028	14.893	1035	0.173455	14.8543	1035	0.057403	14.8491	1035	0.040075	14.8505
1036	0.015865	14.8969	1036	0.187468	14.897	1036	0.036572	14.8996	1036	0.173348	14.861	1036	0.057613	14.8557	1036	0.0403	14.8571
1037	0.01574	14.9037	1037	0.183799	14.9036	1037	0.03614	14.9062	1037	0.173261	14.8676	1037	0.0578	14.8623	1037	0.040513	14.8638
1038	0.015604	14.9104	1038	0.180069	14.9102	1038	0.035746	14.9129	1038	0.174709	14.8742	1038	0.058044	14.869	1038	0.040818	14.8704
1039	0.015471	14.917	1039	0.176379	14.9171	1039	0.035359	14.9195	1039	0.176341	14.8809	1039	0.05829	14.8756	1039	0.041101	14.8771
1040	0.015346	14.9237	1040	0.172864	14.9237	1040	0.034968	14.9264	1040	0.176883	14.8878	1040	0.05861	14.8823	1040	0.041408	14.8837
1041	0.015223	14.9303	1041	0.169396	14.9304	1041	0.034582	14.933	1041	0.177607	14.8944	1041	0.058885	14.8891	1041	0.041656	14.8906
1042	0.015095	14.9369	1042	0.165955	14.937	1042	0.034234	14.9397	1042	0.178409	14.901	1042	0.059124	14.8958	1042	0.041953	14.8972
1043	0.014961	14.9436	1043	0.162593	14.9436	1043	0.03389	14.9463	1043	0.179398	14.9077	1043	0.059366	14.9024	1043	0.042265	14.9038
1044	0.014826	14.9502	1044	0.159392	14.9503	1044	0.033546	14.9529	1044	0.180652	14.9143	1044	0.059724	14.909	1044	0.042627	14.9105
1045	0.014697	14.9571	1045	0.156173	14.9569	1045	0.03322	14.9596	1045	0.182662	14.9209	1045	0.060091	14.9157	1045	0.043032	14.9171
1046	0.014567	14.9637	1046	0.153003	14.9636	1046	0.032909	14.9662	1046	0.184546	14.9276	1046	0.060436	14.9223	1046	0.043635	14.9238
1047	0.01444	14.9703	1047	0.149973	14.9704	1047	0.032592	14.9729	1047	0.185758	14.9342	1047	0.060772	14.929	1047	0.044259	14.9304
1048	0.014322	14.977	1048	0.147018	14.9771	1048	0.032275	14.9797	1048	0.186861	14.9411	1048	0.061095	14.9356	1048	0.044786	14.937
1049	0.014198	14.9836	1049	0.144076	14.9837	1049	0.031983	14.9864	1049	0.187806	14.9477	1049	0.061431	14.9424	1049	0.045333	14.9439
1050	0.01407	14.9903	1050	0.141204	14.9903	1050	0.031698	14.993	1050	0.188529	14.9543	1050	0.061721	14.9491	1050	0.045815	14.9505
1051	0.013952	14.9969	1051	0.138525	14.997	1051	0.031415	14.9996	1051	0.189123	14.961	1051	0.062028	14.9557	1051	0.046289	14.9572
1052	0.013832	15.0035	1052	0.135801	15.0036	1052	0.031135	15.0063	1052	0.189665	14.9676	1052	0.062318	14.9624	1052	0.04664	14.9638
1053	0.013712	15.0104	1053	0.133094	15.0103	1053	0.030855	15.0129	1053	0.191149	14.9742	1053	0.06262	14.969	1053	0.047075	14.9704
1054	0.013596	15.017	1054	0.130523	15.0169	1054	0.030578	15.0195	1054	0.192607	14.9809	1054	0.062863	14.9756	1054	0.04745	14.9771
1055	0.013487	15.0237	1055	0.128071	15.0238	1055	0.030328	15.0262	1055	0.193375	14.9875	1055	0.063157	14.9823	1055	0.047851	14.9837
1056	0.013381	15.0303	1056	0.125578	15.0304	1056	0.030111	15.033	1056	0.194242	14.9944	1056	0.063495	14.9889	1056	0.048189	14.9903
1057	0.013276	15.0369	1057	0.123154	15.037	1057	0.029902	15.0397	1057	0.196224	15.001	1057	0.063906	14.9958	1057	0.048567	14.9972
1058	0.013168	15.0436	1058	0.120872	15.0437	1058	0.029685	15.0463	1058	0.198368	15.0077	1058	0.064279	15.0024	1058	0.04894	15.0039
1059	0.013059	15.0502	1059	0.118587	15.0503	1059	0.029465	15.0529	1059	0.201248	15.0143	1059	0.064675	15.0091	1059	0.049419	15.0105
1060	0.012949	15.0569	1060	0.116335	15.0569	1060	0.029261	15.0596	1060	0.204474	15.0209	1060	0.065055	15.0157	1060	0.049902	15.0171
1061	0.012842	15.0637	1061	0.114121	15.0636	1061	0.029059	15.0662	1061	0.207005	15.0276	1061	0.065479	15.0223	1061	0.050532	15.0238
1062	0.012744	15.0704	1062	0.112052	15.0702	1062	0.02887	15.0729	1062	0.209209	15.0342	1062	0.0659	15.029	1062	0.051108	15.0304
1063	0.012647	15.077	1063	0.109987	15.0771	1063	0.028694	15.0795	1063	0.210535	15.0409	1063	0.066389	15.0356	1063	0.051641	15.037
1064	0.01255	15.0836	1064	0.107971	15.0837	1064	0.028534	15.0863	1064	0.21192	15.0477	1064	0.066822	15.0422	1064	0.052167	15.0437
1065	0.012451	15.0903	1065	0.106015	15.0904	1065	0.028356	15.093	1065	0.213735	15.0543	1065	0.067293	15.0491	1065	0.052653	15.0505
1066	0.012351	15.0969	1066	0.104138	15.097	1066	0.028161	15.0996	1066	0.216007	15.061	1066	0.067715	15.0557	1066	0.053122	15.0572
1067	0.012247	15.1036	1067	0.102269	15.1036	1067	0.02797	15.1063	1067	0.21815	15.0676	1067	0.068121	15.0624	1067	0.053716	15.0638
1068	0.012147	15.1102	1068	0.100439	15.1103	1068	0.027792	15.1129	1068	0.220677	15.0743	1068	0.068511	15.069	1068	0.054374	15.0704
1069	0.012054	15.1171	1069	0.098736	15.1169	1069	0.027635	15.1196	1069	0.22239	15.0809	1069	0.068997	15.0757	1069	0.054934	15.0771
1070	0.011962	15.1237	1070	0.097043	15.1235	1070	0.027488	15.1262	1070	0.223453	15.0876	1070	0.069493	15.0823	1070	0.05551	15.0837
1071	0.011867	15.1303	1071	0.09539	15.1304	1071	0.027331	15.1328	1071	0.22503	15.0942	1071	0.070035	15.0889	1071	0.056021	15.0904
1072	0.01177	15.137	1072	0.093817	15.137	1072	0.027183	15.1396	1072	0.22712	15.1011	1072	0.0706	15.0956	1072	0.056587	15.097
1073	0.011673	15.1436	1073	0.092263	15.1437	1073	0.027034	15.1463	1073	0.228961	15.1077	1073	0.071144	15.1024	1073	0.057128	15.1039
1074	0.011575	15.1503	1074	0.090726	15.1503	1074	0.026884	15.153	1074	0.230594	15.1143	1074	0.071723	15.1091	1074	0.057709	15.1105
1075	0.011476	15.1569	1075	0.08923	15.157	1075	0.026742	15.1596	1075	0.231791	15.121	1075	0.072251	15.1157	1075	0.05837	15.1172
1076	0.011383	15.1635	1076	0.087831	15.1636	1076	0.026607	15.1662	1076	0.232887	15.1276	1076	0.072824	15.1224	1076	0.059159	15.1238
1077	0.011293	15.1704	1077	0.086432	15.1702	1077	0.026476	15.1729	1077	0.233647	15.1342	1077	0.073453	15.129	1077	0.059806	15.1304
1078	0.011204	15.177	1078	0.085068	15.1769	1078	0.026341	15.1795	1078	0.235987	15.1409	1078	0.074251	15.1356	1078	0.060498	15.1371
1079	0.011117	15.1837	1079	0.083736	15.1837	1079	0.026197	15.1862	1079	0.238514	15.1475	1079	0.074949	15.1423	1079	0.061244	15.1437
1080	0.011033	15.1903	1080	0.082451	15.1904	1080	0.02605	15.193	1080	0.241393	15.1544	1080	0.075701	15.1489	1080	0.062214	15.1503
1081	0.010946	15.1969	1081	0.08118	15.197	1081	0.025927	15.1997	1081	0.244228	15.161	1081	0.076408	15.1558	1081	0.063147	15.1572
1082	0.010854	15.2036	1082	0.079946	15.2037	1082	0.025789	15.2063	1082	0.247489	15.1677	1082	0.077242	15.1624	1082	0.06417	15.1639
1083	0.010762	15.2102	1083	0.078802	15.2103	1083	0.025649	15.2129	1083	0.250927	15.1743	1083	0.078066	15.169	1083	0.06519	15.1705
1084	0.010675	15.2168	1084	0.077661	15.2169	1084	0.02552	15.2196	1084	0.254488	15.1809	1084	0.079034	15.1757	1084	0.06637	15.1771
1085	0.010592	15.2237	1085	0.076553	15.2236	1085	0.025409	15.2262	1085	0.25809	15.1876	1085	0.079968	15.1823	1085	0.067466	15.1838
1086	0.010513	15.2303	1086	0.07547	15.2302	1086	0.025286	15.2328	1086	0.261482	15.1942	1086	0.081077	15.189	1086	0.068569	15.1904
1087	0.010438	15.237	1087	0.074447	15.2371	1087	0.025165	15.2395	1087	0.265006	15.2008	1087	0.08207	15.1956	1087	0.06961	15.197
1088	0.010355	15.2436	1088	0.073417	15.2437	1088	0.025055	15.2463	1088	0.267021	15.2077	1088	0.083098	15.2022	1088	0.070834	15.2037
1089	0.010269	15.2503	1089	0.072433	15.2503	1089	0.024939	15.253	1089	0.269661	15.2144	1089	0.084103	15.2091	1089	0.071994	15.2105
1090	0.01018	15.2569	1090	0.07151	15.257	1090	0.024832	15.2596	1090	0.272567	15.221	1090	0.085272	15.2157	1090	0.07316	15.2172
1091	0.010091	15.2635	1091	0.070595	15.2636	1091	0.024735	15.2663	1091	0.275898	15.2276	1091	0.086426	15.2224	1091	0.074323	15.2238
1092	0.010009	15.2702	1092	0.069687	15.2703	1092	0.02465	15.2729	1092	0.278763	15.2343	1092	0.087651	15.229	1092	0.075587	15.2304
1093	0.009935	15.277	1093	0.06881	15.2769	1093	0.024549	15.2796	1093	0.281803	15.2409	1093	0.088898	15.2356	1093	0.076891	15.2371
1094	0.009864	15.2837	1094	0.067998	15.2835	1094	0.024455	15.2862	1094	0.284704	15.2476	1094	0.090188	15.2423	1094	0.07827	15.2437
1095	0.009789	15.2903	1095	0.067168	15.2904	1095	0.024354	15.2928	1095	0.287503	15.2542	1095	0.091575	15.2489	1095	0.079791	15.2503
1096	0.009706	15.297	1096	0.066361	15.297	1096	0.024257	15.2996	1096	0.290222	15.261	1096	0.092957	15.2555	1096	0.081376	15.257
1097	0.00962	15.3036	1097	0.065597	15.3037	1097	0.024166	15.3063	1097	0.293663	15.2677	1097	0.094619	15.2624	1097	0.083085	15.2638
1098	0.009542	15.3102	1098	0.064871	15.3103	1098	0.02407	15.313	1098	0.296487	15.2743	1098	0.096196	15.2691	1098	0.084729	15.2705
1099	0.009467	15.3169	1099	0.064135	15.3169	1099	0.023976	15.3196	1099	0.29826	15.281	1099	0.09802	15.2757	1099	0.08657	15.2771
1100	0.009397	15.3235	1100	0.063412	15.3236	1100	0.023869	15.3262	1100	0.299721	15.2876	1100	0.099721	15.2823	1100	0.088336	15.2838
1101	0.009335	15.3304	1101	0.062742	15.3302	1101	0.023765	15.3329	1101	0.302053	15.2942	1101	0.10169	15.289	1101	0.090297	15.2904
1102	0.009268	15.337	1102	0.062062	15.3369	1102	0.02366	15.3395	1102	0.304364	15.3009	1102	0.103516	15.2956	1102	0.092105	15.2971
1103	0.009204	15.3437	1103	0.061396	15.3437	1103	0.023571	15.3461	1103	0.306819	15.3075	1103	0.10568	15.3023	1103	0.09404	15.3037
1104	0.00914	15.3503	1104	0.060751	15.3504	1104	0.023468	15.3529	1104	0.309407	15.3144	1104	0.107684	15.3089	1104	0.095852	15.3103
1105	0.009071	15.3569	1105	0.060142	15.357	1105	0.023363	15.3597	1105	0.312481	15.321	1105	0.110046	15.3157	1105	0.097969	15.3172
1106	0.009006	15.3636	1106	0.059532	15.3636	1106	0.023268	15.3663	1106	0.315696	15.3276	1106	0.112214	15.3224	1106	0.099957	15.3238
1107	0.008945	15.3702	1107	0.058937	15.3703	1107	0.023162	15.3729	1107	0.317795	15.3343	1107	0.114708	15.329	1107	0.102207	15.3305
1108	0.008883	15.3768	1108	0.058368	15.3769	1108	0.023061	15.3796	1108	0.319703	15.3409	1108	0.117076	15.3357	1108	0.104229	15.3371
1109	0.008819	15.3837	1109	0.057809	15.3835	1109	0.02297	15.3862	1109	0.322946	15.3476	1109	0.119906	15.3423	1109	0.10663	15.3438
1110	0.008756	15.3903	1110	0.057253	15.3902	1110	0.022896	15.3928	1110	0.327308	15.3542	1110	0.122695	15.3489	1110	0.10886	15.3504
1111	0.008693	15.397	1111	0.056712	15.397	1111	0.022801	15.3995	1111	0.330372	15.3608	1111	0.125794	15.3556	1111	0.111534	15.357
1112	0.008629	15.4036	1112	0.056218	15.4037	1112	0.022699	15.4063	1112	0.3333	15.3677	1112	0.12896	15.3622	1112	0.114153	15.3637
1113	0.008561	15.4103	1113	0.055724	15.4103	1113	0.022602	15.413	1113	0.335983	15.3743	1113	0.13227	15.3691	1113	0.117182	15.3705
1114	0.008492	15.4169	1114	0.055237	15.417	1114	0.02251	15.4196	1114	0.339036	15.381	1114	0.135755	15.3757	1114	0.120138	15.3772
1115	0.008434	15.4235	1115	0.054776	15.4236	1115	0.022417	15.4262	1115	0.341693	15.3876	1115	0.139245	15.3824	1115	0.123211	15.3838
1116	0.008375	15.4301	1116	0.054328	15.4302	1116	0.022327	15.4329	1116	0.344416	15.3942	1116	0.143031	15.389	1116	0.126319	15.3904
1117	0.008318	15.437	1117	0.053886	15.4369	1117	0.022255	15.4395	1117	0.347405	15.4009	1117	0.146697	15.3956	1117	0.129597	15.3971
1118	0.008262	15.4437	1118	0.053453	15.4435	1118	0.022185	15.4462	1118	0.350614	15.4075	1118	0.150744	15.4023	1118	0.133067	15.4037
1119	0.008208	15.4503	1119	0.053052	15.4504	1119	0.022118	15.4528	1119	0.352944	15.4141	1119	0.154552	15.4089	1119	0.136505	15.4103
1120	0.008147	15.4569	1120	0.052647	15.457	1120	0.022044	15.4596	1120	0.355302	15.421	1120	0.158728	15.4155	1120	0.140207	15.417
1121	0.008086	15.4636	1121	0.052251	15.4636	1121	0.021989	15.4663	1121	0.357655	15.4277	1121	0.162699	15.4224	1121	0.143652	15.4238
1122	0.008033	15.4702	1122	0.051863	15.4703	1122	0.021933	15.473	1122	0.360831	15.4343	1122	0.167094	15.429	1122	0.147359	15.4305
1123	0.007983	15.4769	1123	0.05148	15.4769	1123	0.021872	15.4796	1123	0.363754	15.4409	1123	0.17127	15.4357	1123	0.150923	15.4371
1124	0.007932	15.4835	1124	0.051101	15.4836	1124	0.021807	15.4862	1124	0.367149	15.4476	1124	0.175919	15.4423	1124	0.154878	15.4437
1125	0.007878	15.4903	1125	0.050727	15.4902	1125	0.02175	15.4929	1125	0.370523	15.4542	1125	0.180335	15.4489	1125	0.158736	15.4504
1126	0.007824	15.497	1126	0.050371	15.4968	1126	0.021695	15.4995	1126	0.374263	15.4609	1126	0.185413	15.4556	1126	0.163137	15.457
1127	0.007772	15.5036	1127	0.050021	15.5037	1127	0.021636	15.5061	1127	0.378124	15.4675	1127	0.190142	15.4622	1127	0.167331	15.4637
1128	0.007718	15.5103	1128	0.049675	15.5104	1128	0.021571	15.5129	1128	0.382861	15.4743	1128	0.195708	15.4689	1128	0.172122	15.4703
1129	0.007667	15.5169	1129	0.049334	15.517	1129	0.021515	15.5196	1129	0.387951	15.481	1129	0.200787	15.4757	1129	0.176603	15.4772
1130	0.007619	15.5235	1130	0.049011	15.5236	1130	0.02146	15.5263	1130	0.391509	15.4876	1130	0.206622	15.4824	1130	0.181618	15.4838
1131	0.007568	15.5302	1131	0.048682	15.5303	1131	0.0214	15.5329	1131	0.394789	15.4943	1131	0.212036	15.489	1131	0.186388	15.4904
1132	0.007518	15.5368	1132	0.048361	15.5369	1132	0.021334	15.5396	1132	0.398582	15.5009	1132	0.217891	15.4956	1132	0.191942	15.4971
1133	0.007468	15.5437	1133	0.048067	15.5435	1133	0.021274	15.5462	1133	0.403521	15.5075	1133	0.223524	15.5023	1133	0.197074	15.5037
1134	0.00742	15.5503	1134	0.047761	15.5502	1134	0.021223	15.5528	1134	0.407752	15.5142	1134	0.229689	15.5089	1134	0.202984	15.5104
1135	0.007373	15.557	1135	0.047465	15.557	1135	0.021171	15.5595	1135	0.412297	15.5208	1135	0.235844	15.5155	1135	0.208423	15.517
1136	0.007329	15.5636	1136	0.047187	15.5637	1136	0.021118	15.5662	1136	0.416292	15.5277	1136	0.242103	15.5222	1136	0.214255	15.5236
1137	0.007285	15.5702	1137	0.046928	15.5703	1137	0.021065	15.573	1137	0.420354	15.5343	1137	0.248533	15.529	1137	0.219759	15.5305
1138	0.00724	15.5769	1138	0.046644	15.5769	1138	0.021018	15.5796	1138	0.423621	15.541	1138	0.254756	15.5357	1138	0.225524	15.5371
1139	0.007197	15.5835	1139	0.046371	15.5836	1139	0.020956	15.5862	1139	0.426856	15.5476	1139	0.261373	15.5423	1139	0.231211	15.5438
1140	0.007156	15.5901	1140	0.046114	15.5902	1140	0.020896	15.5929	1140	0.430537	15.5542	1140	0.267843	15.549	1140	0.237371	15.5504
1141	0.007122	15.597	1141	0.04586	15.5968	1141	0.020842	15.5995	1141	0.435055	15.5609	1141	0.275018	15.5556	1141	0.243669	15.557
1142	0.007088	15.6036	1142	0.045606	15.6035	1142	0.020801	15.6061	1142	0.438284	15.5675	1142	0.281964	15.5622	1142	0.249914	15.5637
1143	0.00705	15.6103	1143	0.045349	15.6103	1143	0.020746	15.6128	1143	0.441721	15.5741	1143	0.289589	15.5689	1143	0.256509	15.5703
1144	0.007004	15.6169	1144	0.045114	15.617	1144	0.020697	15.6195	1144	0.4449	15.581	1144	0.296659	15.5755	1144	0.262704	15.577
1145	0.006964	15.6236	1145	0.04487	15.6236	1145	0.020656	15.6263	1145	0.447631	15.5876	1145	0.304523	15.5824	1145	0.269519	15.5838
1146	0.006923	15.6302	1146	0.044626	15.6303	1146	0.020614	15.6329	1146	0.450255	15.5943	1146	0.311793	15.589	1146	0.276145	15.5905
1147	0.00688	15.6368	1147	0.044382	15.6369	1147	0.020568	15.6396	1147	0.453756	15.6009	1147	0.319797	15.5956	1147	0.283675	15.5971
1148	0.00684	15.6435	1148	0.044156	15.6435	1148	0.020518	15.6462	1148	0.457349	15.6075	1148	0.327104	15.6023	1148	0.290698	15.6037
1149	0.006803	15.6503	1149	0.043933	15.6502	1149	0.020466	15.6529	1149	0.461671	15.6142	1149	0.335272	15.6089	1149	0.298331	15.6104
1150	0.006768	15.657	1150	0.043711	15.6568	1150	0.020426	15.6595	1150	0.466248	15.6208	1150	0.342545	15.6156	1150	0.305138	15.617
1151	0.006734	15.6636	1151	0.043499	15.6637	1151	0.020374	15.6661	1151	0.470929	15.6275	1151	0.350578	15.6222	1151	0.312885	15.6236
1152	0.006693	15.6702	1152	0.043286	15.6703	1152	0.020312	15.6729	1152	0.475811	15.6343	1152	0.357819	15.6288	1152	0.319803	15.6303
1153	0.006653	15.6769	1153	0.043073	15.677	1153	0.020272	15.6796	1153	0.479342	15.641	1153	0.365727	15.6357	1153	0.327588	15.6372
1154	0.00662	15.6835	1154	0.042864	15.6836	1154	0.02022	15.6863	1154	0.482873	15.6476	1154	0.372947	15.6424	1154	0.334681	15.6438
1155	0.006583	15.6902	1155	0.042663	15.6902	1155	0.020164	15.6929	1155	0.4868	15.6542	1155	0.380918	15.649	1155	0.342636	15.6504
1156	0.006549	15.6968	1156	0.042461	15.6969	1156	0.02012	15.6996	1156	0.49099	15.6609	1156	0.388512	15.6556	1156	0.349736	15.6571
1157	0.006518	15.7037	1157	0.042259	15.7035	1157	0.020082	15.7062	1157	0.494902	15.6675	1157	0.396767	15.6623	1157	0.357562	15.6637
1158	0.006487	15.7103	1158	0.042077	15.7102	1158	0.020041	15.7128	1158	0.499793	15.6742	1158	0.404941	15.6689	1158	0.364853	15.6703
1159	0.006455	15.7169	1159	0.041888	15.717	1159	0.019999	15.7195	1159	0.504097	15.6808	1159	0.413334	15.6755	1159	0.373006	15.677
1160	0.00642	15.7236	1160	0.041706	15.7237	1160	0.019934	15.7262	1160	0.509034	15.6877	1160	0.42198	15.6822	1160	0.38086	15.6836
1161	0.006381	15.7302	1161	0.041537	15.7303	1161	0.01988	15.733	1161	0.513495	15.6943	1161	0.430309	15.689	1161	0.388977	15.6905
1162	0.006348	15.7369	1162	0.041375	15.737	1162	0.019837	15.7396	1162	0.518177	15.7009	1162	0.439341	15.6957	1162	0.397221	15.6971
1163	0.006318	15.7435	1163	0.041203	15.7436	1163	0.019787	15.7462	1163	0.522905	15.7076	1163	0.447919	15.7023	1163	0.405484	15.7037
1164	0.006289	15.7501	1164	0.041038	15.7502	1164	0.019728	15.7529	1164	0.527933	15.7142	1164	0.457287	15.7089	1164	0.414034	15.7104
1165	0.006257	15.757	1165	0.040886	15.7569	1165	0.019675	15.7595	1165	0.53266	15.7208	1165	0.465592	15.7156	1165	0.42206	15.717
1166	0.006226	15.7636	1166	0.04071	15.7635	1166	0.019621	15.7661	1166	0.53815	15.7275	1166	0.474448	15.7222	1166	0.430579	15.7237
1167	0.006194	15.7703	1167	0.040534	15.7703	1167	0.019575	15.7728	1167	0.542852	15.7341	1167	0.482404	15.7289	1167	0.43838	15.7303
1168	0.006163	15.7769	1168	0.040364	15.777	1168	0.01953	15.7795	1168	0.546202	15.741	1168	0.491151	15.7355	1168	0.44677	15.7369
1169	0.006127	15.7835	1169	0.040209	15.7836	1169	0.019497	15.7863	1169	0.548994	15.7476	1169	0.499022	15.7424	1169	0.454361	15.7438
1170	0.006093	15.7902	1170	0.040031	15.7903	1170	0.019479	15.7929	1170	0.551852	15.7543	1170	0.507749	15.749	1170	0.462802	15.7504
1171	0.006062	15.7968	1171	0.039856	15.7969	1171	0.01944	15.7996	1171	0.554845	15.7609	1171	0.515802	15.7557	1171	0.470322	15.7571
1172	0.006029	15.8035	1172	0.039691	15.8035	1172	0.019402	15.8062	1172	0.558328	15.7675	1172	0.524652	15.7623	1172	0.47867	15.7637
1173	0.005991	15.8103	1173	0.039534	15.8102	1173	0.019364	15.8128	1173	0.562307	15.7742	1173	0.532771	15.7689	1173	0.486352	15.7704
1174	0.005957	15.817	1174	0.039379	15.8168	1174	0.01934	15.8195	1174	0.566307	15.7808	1174	0.541789	15.7756	1174	0.495178	15.777
1175	0.00593	15.8236	1175	0.039218	15.8236	1175	0.019305	15.8261	1175	0.570602	15.7874	1175	0.550229	15.7822	1175	0.503376	15.7836
1176	0.005899	15.8302	1176	0.039076	15.8303	1176	0.01926	15.8328	1176	0.573859	15.7943	1176	0.559647	15.7888	1176	0.512803	15.7903
1177	0.005867	15.8369	1177	0.038938	15.8369	1177	0.019207	15.8396	1177	0.577084	15.8009	1177	0.568262	15.7957	1177	0.521431	15.7971
1178	0.005836	15.8435	1178	0.038799	15.8436	1178	0.019165	15.8462	1178	0.581053	15.8076	1178	0.577539	15.8023	1178	0.530979	15.8038
1179	0.005814	15.8502	1179	0.038655	15.8502	1179	0.019118	15.8529	1179	0.586161	15.8142	1179	0.586217	15.809	1179	0.539679	15.8104
1180	0.005794	15.8568	1180	0.038521	15.8569	1180	0.019065	15.8595	1180	0.590407	15.8209	1180	0.595224	15.8156	1180	0.549222	15.817
1181	0.005773	15.8637	1181	0.038376	15.8635	1181	0.01903	15.8662	1181	0.594829	15.8275	1181	0.603858	15.8223	1181	0.558326	15.8237
1182	0.005754	15.8703	1182	0.038224	15.8701	1182	0.019013	15.8728	1182	0.598399	15.8341	1182	0.612269	15.8289	1182	0.567627	15.8303
1183	0.005741	15.877	1183	0.038086	15.877	1183	0.018991	15.8794	1183	0.602148	15.8408	1183	0.620686	15.8355	1183	0.576606	15.837
1184	0.005719	15.8836	1184	0.03795	15.8836	1184	0.018956	15.8862	1184	0.605643	15.8477	1184	0.628651	15.8422	1184	0.585092	15.8436
1185	0.005696	15.8902	1185	0.037821	15.8903	1185	0.018921	15.893	1185	0.609875	15.8543	1185	0.636908	15.849	1185	0.593819	15.8505
1186	0.005674	15.8969	1186	0.037701	15.8969	1186	0.018889	15.8996	1186	0.614127	15.8609	1186	0.644522	15.8557	1186	0.601778	15.8571
1187	0.005653	15.9035	1187	0.037565	15.9035	1187	0.018857	15.9062	1187	0.618469	15.8676	1187	0.652651	15.8623	1187	0.61024	15.8637
1188	0.005628	15.9101	1188	0.037432	15.9102	1188	0.018817	15.9129	1188	0.622237	15.8742	1188	0.660054	15.8689	1188	0.618179	15.8704
1189	0.0056	15.917	1189	0.037299	15.9168	1189	0.018759	15.9195	1189	0.624578	15.8808	1189	0.668148	15.8756	1189	0.627222	15.877
1190	0.005574	15.9236	1190	0.037175	15.9235	1190	0.01871	15.9261	1190	0.626719	15.8875	1190	0.675457	15.8822	1190	0.635199	15.8837
1191	0.005549	15.9303	1191	0.037056	15.9303	1191	0.018676	15.9328	1191	0.628995	15.8941	1191	0.683478	15.8888	1191	0.644171	15.8903
1192	0.005522	15.9369	1192	0.036938	15.937	1192	0.018624	15.9395	1192	0.631291	15.901	1192	0.690934	15.8955	1192	0.65233	15.8969
1193	0.005494	15.9435	1193	0.036824	15.9436	1193	0.018577	15.9463	1193	0.63384	15.9076	1193	0.699096	15.9024	1193	0.661251	15.9038
1194	0.005469	15.9502	1194	0.036712	15.9503	1194	0.01854	15.9529	1194	0.636665	15.9142	1194	0.706695	15.909	1194	0.669579	15.9104
1195	0.005447	15.9568	1195	0.036583	15.9569	1195	0.018497	15.9595	1195	0.6389	15.9209	1195	0.715055	15.9156	1195	0.678535	15.9171
1196	0.005424	15.9634	1196	0.03646	15.9635	1196	0.018463	15.9662	1196	0.641343	15.9275	1196	0.722801	15.9223	1196	0.686829	15.9237
1197	0.005401	15.9703	1197	0.036356	15.9702	1197	0.018422	15.9728	1197	0.644287	15.9342	1197	0.731124	15.9289	1197	0.695659	15.9304
1198	0.005384	15.977	1198	0.036242	15.9768	1198	0.018388	15.9794	1198	0.647605	15.9408	1198	0.738741	15.9355	1198	0.703646	15.937
1199	0.005371	15.9836	1199	0.036136	15.9836	1199	0.018385	15.9861	1199	0.65149	15.9474	1199	0.746807	15.9422	1199	0.711826	15.9436
1200	0.005357	15.9902	1200	0.03604	15.9903	1200	0.018359	15.9928	1200	0.655634	15.9543	1200	0.754107	15.9488	1200	0.719262	15.9502
1201	0.005342	15.9969	1201	0.035951	15.9969	1201	0.018322	15.9996	1201	0.659923	15.9609	1201	0.761747	15.9557	1201	0.72686	15.9571
1202	0.005323	16.0035	1202	0.035849	16.0036	1202	0.018282	16.0062	1202	0.664985	15.9676	1202	0.768673	15.9623	1202	0.733911	15.9638
1203	0.005305	16.0101	1203	0.035741	16.0102	1203	0.018241	16.0129	1203	0.669522	15.9742	1203	0.776263	15.969	1203	0.741494	15.9704
1204	0.00529	16.0168	1204	0.035629	16.0168	1204	0.018205	16.0195	1204	0.674452	15.9809	1204	0.783247	15.9756	1204	0.748596	15.977
1205	0.005275	16.0236	1205	0.035535	16.0235	1205	0.018174	16.0261	1205	0.67873	15.9875	1205	0.790417	15.9823	1205	0.755703	15.9837
1206	0.005256	16.0303	1206	0.035423	16.0301	1206	0.01813	16.0328	1206	0.682207	15.9941	1206	0.797428	15.9889	1206	0.76268	15.9903
1207	0.005238	16.0369	1207	0.035309	16.0369	1207	0.018089	16.0394	1207	0.6853	16.0008	1207	0.804176	15.9955	1207	0.769707	15.9969
1208	0.00522	16.0435	1208	0.035208	16.0436	1208	0.018058	16.0461	1208	0.68894	16.0076	1208	0.810936	16.0022	1208	0.776791	16.0036
1209	0.005197	16.0502	1209	0.03509	16.0503	1209	0.018022	16.0529	1209	0.692351	16.0143	1209	0.817526	16.009	1209	0.784017	16.0104
1210	0.005167	16.0568	1210	0.034977	16.0569	1210	0.017999	16.0595	1210	0.696858	16.0209	1210	0.824484	16.0157	1210	0.791832	16.0171
1211	0.005134	16.0635	1211	0.034867	16.0635	1211	0.017975	16.0662	1211	0.700588	16.0275	1211	0.831127	16.0223	1211	0.798822	16.0237
1212	0.005111	16.0701	1212	0.03477	16.0702	1212	0.017949	16.0728	1212	0.705236	16.0342	1212	0.838331	16.0289	1212	0.806196	16.0303
1213	0.005091	16.077	1213	0.034675	16.0768	1213	0.017924	16.0795	1213	0.709682	16.0408	1213	0.844283	16.0356	1213	0.812608	16.037
1214	0.00507	16.0836	1214	0.034579	16.0834	1214	0.017904	16.0861	1214	0.714039	16.0475	1214	0.850561	16.0422	1214	0.819723	16.0436
1215	0.005045	16.0903	1215	0.034482	16.0903	1215	0.01788	16.0927	1215	0.718746	16.0541	1215	0.855928	16.0488	1215	0.825999	16.0503
1216	0.005026	16.0969	1216	0.034397	16.0969	1216	0.017852	16.0994	1216	0.724251	16.0609	1216	0.861669	16.0555	1216	0.832751	16.0569
1217	0.005004	16.1035	1217	0.034307	16.1036	1217	0.01782	16.1062	1217	0.729677	16.0676	1217	0.866902	16.0623	1217	0.838681	16.0638
1218	0.004976	16.1102	1218	0.03421	16.1102	1218	0.017789	16.1129	1218	0.733888	16.0742	1218	0.872449	16.069	1218	0.845647	16.0704
1219	0.004947	16.1168	1219	0.034116	16.1169	1219	0.017753	16.1195	1219	0.737893	16.0809	1219	0.877327	16.0756	1219	0.851431	16.0771
1220	0.004931	16.1234	1220	0.034003	16.1235	1220	0.017716	16.1261	1220	0.741456	16.0875	1220	0.882561	16.0823	1220	0.857621	16.0837
1221	0.004921	16.1303	1221	0.03389	16.1301	1221	0.017691	16.1328	1221	0.745759	16.0941	1221	0.887184	16.0889	1221	0.863437	16.0903
1222	0.004909	16.1369	1222	0.033785	16.1368	1222	0.017663	16.1394	1222	0.748495	16.1008	1222	0.892168	16.0955	1222	0.870203	16.097
1223	0.004892	16.1436	1223	0.033678	16.1436	1223	0.017634	16.1461	1223	0.751286	16.1074	1223	0.896869	16.1022	1223	0.876342	16.1036
1224	0.004873	16.1502	1224	0.033571	16.1503	1224	0.017598	16.1527	1224	0.754012	16.1143	1224	0.902485	16.1088	1224	0.882202	16.1103
1225	0.004856	16.1568	1225	0.03347	16.1569	1225	0.017559	16.1596	1225	0.75747	16.1209	1225	0.90763	16.1157	1225	0.887722	16.1171
1226	0.004839	16.1635	1226	0.033379	16.1636	1226	0.01753	16.1662	1226	0.760905	16.1275	1226	0.912786	16.1223	1226	0.893518	16.1237
1227	0.004829	16.1701	1227	0.033282	16.1702	1227	0.017515	16.1728	1227	0.764631	16.1342	1227	0.917631	16.1289	1227	0.899014	16.1304
1228	0.004819	16.1767	1228	0.033191	16.1768	1228	0.017491	16.1795	1228	0.768731	16.1408	1228	0.922942	16.1356	1228	0.903889	16.137
1229	0.004804	16.1836	1229	0.033111	16.1835	1229	0.017473	16.1861	1229	0.773329	16.1475	1229	0.928043	16.1422	1229	0.908649	16.1437
1230	0.004794	16.1903	1230	0.03304	16.1901	1230	0.017457	16.1928	1230	0.77722	16.1541	1230	0.933172	16.1488	1230	0.91307	16.1503
1231	0.004778	16.1969	1231	0.032969	16.1969	1231	0.017428	16.1994	1231	0.781565	16.1607	1231	0.938224	16.1555	1231	0.917669	16.1569
1232	0.004759	16.2035	1232	0.032891	16.2036	1232	0.017405	16.2061	1232	0.785705	16.1676	1232	0.942776	16.1621	1232	0.921601	16.1636
1233	0.004736	16.2102	1233	0.032807	16.2102	1233	0.017381	16.2129	1233	0.790408	16.1742	1233	0.947348	16.169	1233	0.925908	16.1704
1234	0.004721	16.2168	1234	0.032729	16.2169	1234	0.017354	16.2196	1234	0.794529	16.1809	1234	0.951124	16.1756	1234	0.930215	16.1771
1235	0.004709	16.2234	1235	0.032649	16.2235	1235	0.017335	16.2262	1235	0.797744	16.1875	1235	0.955165	16.1823	1235	0.934864	16.1837
1236	0.004696	16.2301	1236	0.032561	16.2301	1236	0.017323	16.2328	1236	0.800777	16.1942	1236	0.958875	16.1889	1236	0.939044	16.1904
1237	0.004678	16.2369	1237	0.032484	16.2368	1237	0.017309	16.2395	1237	0.804491	16.2008	1237	0.96281	16.1956	1237	0.943693	16.197
1238	0.004667	16.2436	1238	0.032412	16.2434	1238	0.017291	16.2461	1238	0.808393	16.2074	1238	0.965942	16.2022	1238	0.947983	16.2036
1239	0.004663	16.2502	1239	0.032331	16.2502	1239	0.017263	16.2527	1239	0.81101	16.2141	1239	0.969244	16.2088	1239	0.9526	16.2103
1240	0.004645	16.2569	1240	0.032238	16.2569	1240	0.017235	16.2594	1240	0.813125	16.2209	1240	0.971781	16.2155	1240	0.95669	16.2169
1241	0.004631	16.2635	1241	0.03215	16.2636	1241	0.017213	16.2662	1241	0.814454	16.2276	1241	0.974227	16.2223	1241	0.960824	16.2238
1242	0.004621	16.2701	1242	0.032065	16.2702	1242	0.017178	16.2729	1242	0.81594	16.2342	1242	0.976455	16.229	1242	0.9644	16.2304
1243	0.004616	16.2768	1243	0.03199	16.2768	1243	0.017153	16.2795	1243	0.817111	16.2408	1243	0.979026	16.2356	1243	0.96799	16.237
1244	0.004607	16.2834	1244	0.031909	16.2835	1244	0.01713	16.2861	1244	0.818681	16.2475	1244	0.981148	16.2422	1244	0.971119	16.2437
1245	0.004594	16.2903	1245	0.03183	16.2901	1245	0.017104	16.2928	1245	0.820542	16.2541	1245	0.983266	16.2489	1245	0.973857	16.2503
1246	0.004581	16.2969	1246	0.031751	16.2968	1246	0.017075	16.2994	1246	0.82271	16.2608	1246	0.985106	16.2555	1246	0.976147	16.2569
1247	0.004567	16.3036	1247	0.031671	16.3035	1247	0.017035	16.306	1247	0.82472	16.2674	1247	0.987066	16.2621	1247	0.97808	16.2636
1248	0.004548	16.3102	1248	0.031577	16.3103	1248	0.016996	16.3127	1248	0.828085	16.2743	1248	0.988787	16.2688	1248	0.97973	16.2702
1249	0.004528	16.3168	1249	0.03149	16.3169	1249	0.016966	16.3196	1249	0.832121	16.2809	1249	0.990432	16.2756	1249	0.981113	16.2771
1250	0.004513	16.3235	1250	0.031417	16.3235	1250	0.016938	16.3262	1250	0.835809	16.2875	1250	0.992052	16.2823	1250	0.982354	16.2837
1251	0.004498	16.3301	1251	0.031334	16.3302	1251	0.0169	16.3328	1251	0.839408	16.2942	1251	0.993832	16.2889	1251	0.983943	16.2904
1252	0.004486	16.3367	1252	0.031254	16.3368	1252	0.016862	16.3395	1252	0.843815	16.3008	1252	0.995438	16.2955	1252	0.985553	16.297
1253	0.004473	16.3436	1253	0.031175	16.3435	1253	0.016836	16.3461	1253	0.847635	16.3075	1253	0.996695	16.3022	1253	0.986952	16.3036
1254	0.004452	16.3502	1254	0.031101	16.3501	1254	0.016804	16.3528	1254	0.850742	16.3141	1254	0.997914	16.3088	1254	0.988416	16.3103
1255	0.004432	16.3569	1255	0.031027	16.3569	1255	0.016778	16.3594	1255	0.853606	16.3207	1255	0.998787	16.3155	1255	0.990091	16.3169
1256	0.004415	16.3635	1256	0.030949	16.3636	1256	0.016749	16.366	1256	0.856966	16.3276	1256	0.999634	16.3221	1256	0.991921	16.3236
1257	0.004401	16.3701	1257	0.030878	16.3702	1257	0.01673	16.3729	1257	0.859413	16.3342	1257	0.999871	16.329	1257	0.99353	16.3304
1258	0.004387	16.3768	1258	0.030822	16.3769	1258	0.016713	16.3795	1258	0.86206	16.3409	1258	1	16.3356	1258	0.995126	16.3371
1259	0.004375	16.3834	1259	0.030755	16.3835	1259	0.016692	16.3862	1259	0.865119	16.3475	1259	0.999793	16.3422	1259	0.996653	16.3437
1260	0.004365	16.3901	1260	0.03068	16.3901	1260	0.016663	16.3928	1260	0.867895	16.3542	1260	0.999481	16.3489	1260	0.998377	16.3503
1261	0.004356	16.3969	1261	0.030609	16.3968	1261	0.016645	16.3995	1261	0.870165	16.3608	1261	0.999029	16.3555	1261	0.999297	16.357
1262	0.00434	16.4036	1262	0.030545	16.4034	1262	0.016643	16.4061	1262	0.872535	16.3674	1262	0.998627	16.3622	1262	0.999778	16.3636
1263	0.004321	16.4102	1263	0.030474	16.4102	1263	0.01663	16.4127	1263	0.875293	16.3741	1263	0.998086	16.3688	1263	1	16.3702
1264	0.004307	16.4169	1264	0.030397	16.4169	1264	0.016628	16.4194	1264	0.878941	16.3809	1264	0.997495	16.3754	1264	0.999877	16.3769
1265	0.004303	16.4235	1265	0.030316	16.4236	1265	0.016612	16.4262	1265	0.882819	16.3876	1265	0.996969	16.3823	1265	0.999559	16.3837
1266	0.004295	16.4301	1266	0.030241	16.4302	1266	0.016577	16.4329	1266	0.885884	16.3942	1266	0.996419	16.389	1266	0.998998	16.3904
1267	0.004284	16.4368	1267	0.030162	16.4368	1267	0.016554	16.4395	1267	0.888941	16.4009	1267	0.99605	16.3956	1267	0.998457	16.397
1268	0.004274	16.4434	1268	0.030076	16.4435	1268	0.016528	16.4461	1268	0.890143	16.4075	1268	0.995508	16.4022	1268	0.998247	16.4036
1269	0.00426	16.4502	1269	0.029999	16.4501	1269	0.0165	16.4528	1269	0.891203	16.4141	1269	0.995048	16.4089	1269	0.997905	16.4103
1270	0.004246	16.4569	1270	0.02993	16.4567	1270	0.016474	16.4594	1270	0.89348	16.4208	1270	0.994176	16.4155	1270	0.997126	16.4169
1271	0.004229	16.4635	1271	0.029856	16.4635	1271	0.016445	16.466	1271	0.89628	16.4274	1271	0.993223	16.4221	1271	0.996457	16.4235
1272	0.004219	16.4702	1272	0.029774	16.4703	1272	0.016412	16.4727	1272	0.89819	16.4343	1272	0.991722	16.4288	1272	0.996062	16.4302
1273	0.00421	16.4768	1273	0.029706	16.4769	1273	0.016375	16.4795	1273	0.900234	16.4409	1273	0.990234	16.4356	1273	0.99574	16.437
1274	0.004202	16.4834	1274	0.029638	16.4835	1274	0.016344	16.4862	1274	0.901787	16.4475	1274	0.988068	16.4423	1274	0.995505	16.4437
1275	0.004186	16.4901	1275	0.029564	16.4902	1275	0.016308	16.4928	1275	0.9034	16.4542	1275	0.985862	16.4489	1275	0.995236	16.4503
1276	0.004169	16.4967	1276	0.029483	16.4968	1276	0.016284	16.4995	1276	0.905058	16.4608	1276	0.983655	16.4555	1276	0.994409	16.457
1277	0.004156	16.5036	1277	0.029408	16.5035	1277	0.01625	16.5061	1277	0.906892	16.4674	1277	0.981508	16.4622	1277	0.993264	16.4636
1278	0.004145	16.5102	1278	0.029334	16.5101	1278	0.016224	16.5127	1278	0.908892	16.4741	1278	0.979451	16.4688	1278	0.991928	16.4703
1279	0.004137	16.5169	1279	0.029263	16.5168	1279	0.016197	16.5194	1279	0.912088	16.4807	1279	0.977344	16.4755	1279	0.99068	16.4769
1280	0.004129	16.5235	1280	0.029193	16.5236	1280	0.016169	16.526	1280	0.91504	16.4876	1280	0.975299	16.4821	1280	0.989157	16.4835
1281	0.004119	16.5301	1281	0.029135	16.5302	1281	0.016145	16.5329	1281	0.916797	16.4942	1281	0.972906	16.489	1281	0.987219	16.4904
1282	0.004109	16.5368	1282	0.029071	16.5369	1282	0.016122	16.5395	1282	0.918326	16.5009	1282	0.970667	16.4956	1282	0.985029	16.4971
1283	0.004103	16.5434	1283	0.029001	16.5435	1283	0.016097	16.5461	1283	0.920705	16.5075	1283	0.968139	16.5023	1283	0.982507	16.5037
1284	0.004093	16.55	1284	0.02894	16.5501	1284	0.01606	16.5528	1284	0.923215	16.5141	1284	0.965794	16.5089	1284	0.980081	16.5103
1285	0.004084	16.5569	1285	0.028876	16.5568	1285	0.01604	16.5594	1285	0.926857	16.5208	1285	0.962905	16.5155	1285	0.977554	16.517
1286	0.004079	16.5635	1286	0.028814	16.5634	1286	0.016028	16.5661	1286	0.930921	16.5274	1286	0.960019	16.5222	1286	0.975674	16.5236
1287	0.004067	16.5702	1287	0.028747	16.5701	1287	0.016009	16.5727	1287	0.935334	16.5341	1287	0.957051	16.5288	1287	0.974104	16.5302
1288	0.004059	16.5768	1288	0.028693	16.5769	1288	0.015975	16.5793	1288	0.939861	16.5409	1288	0.954107	16.5354	1288	0.972213	16.5369
1289	0.004052	16.5835	1289	0.028643	16.5835	1289	0.015956	16.5862	1289	0.943229	16.5476	1289	0.950797	16.5423	1289	0.969567	16.5437
1290	0.004042	16.5901	1290	0.02859	16.5902	1290	0.015944	16.5928	1290	0.946608	16.5542	1290	0.947798	16.5489	1290	0.967345	16.5504
1291	0.004034	16.5968	1291	0.028521	16.5968	1291	0.015934	16.5995	1291	0.950875	16.5608	1291	0.944614	16.5556	1291	0.965212	16.557
1292	0.004028	16.6034	1292	0.028461	16.6035	1292	0.01591	16.6061	1292	0.955176	16.5675	1292	0.94166	16.5622	1292	0.963284	16.5636
1293	0.00402	16.6102	1293	0.028394	16.6101	1293	0.015895	16.6127	1293	0.958435	16.5741	1293	0.938383	16.5688	1293	0.961181	16.5703
1294	0.004013	16.6169	1294	0.028321	16.6167	1294	0.015886	16.6194	1294	0.961954	16.5807	1294	0.93562	16.5755	1294	0.959133	16.5769
1295	0.004002	16.6235	1295	0.028262	16.6235	1295	0.015881	16.626	1295	0.964121	16.5874	1295	0.932551	16.5821	1295	0.956709	16.5836
1296	0.003988	16.6302	1296	0.028205	16.6302	1296	0.01585	16.6327	1296	0.966055	16.5942	1296	0.929528	16.5887	1296	0.954258	16.5902
1297	0.003978	16.6368	1297	0.028147	16.6369	1297	0.015832	16.6395	1297	0.967451	16.6009	1297	0.925887	16.5956	1297	0.951198	16.597
1298	0.003973	16.6435	1298	0.028078	16.6435	1298	0.015833	16.6462	1298	0.968522	16.6075	1298	0.922335	16.6023	1298	0.948327	16.6037
1299	0.00396	16.6501	1299	0.028005	16.6502	1299	0.015818	16.6528	1299	0.969584	16.6142	1299	0.918468	16.6089	1299	0.945213	16.6103
1300	0.003947	16.6567	1300	0.027937	16.6568	1300	0.015795	16.6594	1300	0.970691	16.6208	1300	0.914535	16.6155	1300	0.942113	16.617
1301	0.003937	16.6635	1301	0.027881	16.6634	1301	0.015771	16.6661	1301	0.971766	16.6274	1301	0.910436	16.6222	1301	0.938331	16.6236
1302	0.003923	16.6702	1302	0.027827	16.6701	1302	0.015765	16.6727	1302	0.972734	16.6341	1302	0.906092	16.6288	1302	0.934437	16.6303
1303	0.00391	16.6769	1303	0.027773	16.6768	1303	0.015742	16.6793	1303	0.973407	16.6407	1303	0.901869	16.6354	1303	0.930563	16.6369
1304	0.003901	16.6835	1304	0.027721	16.6836	1304	0.015711	16.686	1304	0.97361	16.6476	1304	0.897257	16.6421	1304	0.926543	16.6435
1305	0.003894	16.6901	1305	0.027668	16.6902	1305	0.01568	16.6928	1305	0.973729	16.6542	1305	0.893024	16.6489	1305	0.922728	16.6504
1306	0.00389	16.6968	1306	0.027614	16.6969	1306	0.015692	16.6995	1306	0.974506	16.6608	1306	0.888051	16.6556	1306	0.918759	16.657
1307	0.003888	16.7034	1307	0.027559	16.7035	1307	0.015677	16.7061	1307	0.975713	16.6675	1307	0.883688	16.6622	1307	0.914847	16.6637
1308	0.003876	16.71	1308	0.027511	16.7101	1308	0.015648	16.7128	1308	0.977026	16.6741	1308	0.879236	16.6688	1308	0.910539	16.6703
1309	0.00387	16.7169	1309	0.02747	16.7168	1309	0.015636	16.7194	1309	0.978354	16.6807	1309	0.875174	16.6755	1309	0.906892	16.6769
1310	0.003865	16.7235	1310	0.02742	16.7234	1310	0.01563	16.726	1310	0.979759	16.6874	1310	0.870519	16.6821	1310	0.902894	16.6836
1311	0.003856	16.7302	1311	0.027366	16.7301	1311	0.015623	16.7327	1311	0.981335	16.694	1311	0.866336	16.6888	1311	0.89968	16.6902
1312	0.003846	16.7368	1312	0.027306	16.7369	1312	0.01561	16.7393	1312	0.98297	16.7009	1312	0.861899	16.6954	1312	0.896061	16.6968
1313	0.003837	16.7434	1313	0.027256	16.7435	1313	0.015601	16.7462	1313	0.984576	16.7075	1313	0.857756	16.7023	1313	0.892813	16.7037
1314	0.003826	16.7501	1314	0.027208	16.7502	1314	0.015596	16.7528	1314	0.986252	16.7142	1314	0.853097	16.7089	1314	0.889198	16.7103
1315	0.003811	16.7567	1315	0.027162	16.7568	1315	0.015595	16.7595	1315	0.98817	16.7208	1315	0.848913	16.7156	1315	0.885758	16.717
1316	0.003798	16.7634	1316	0.027121	16.7634	1316	0.015579	16.7661	1316	0.989177	16.7275	1316	0.84493	16.7222	1316	0.881616	16.7236
1317	0.003788	16.7702	1317	0.027071	16.7701	1317	0.015565	16.7727	1317	0.989624	16.7341	1317	0.841025	16.7288	1317	0.87802	16.7303
1318	0.003778	16.7769	1318	0.027017	16.7767	1318	0.015555	16.7794	1318	0.990115	16.7407	1318	0.836113	16.7355	1318	0.873729	16.7369
1319	0.003771	16.7835	1319	0.026958	16.7834	1319	0.015544	16.786	1319	0.991221	16.7474	1319	0.831609	16.7421	1319	0.869689	16.7435
1320	0.003762	16.7901	1320	0.026912	16.7902	1320	0.015518	16.7926	1320	0.992155	16.7542	1320	0.826979	16.7487	1320	0.8651	16.7502
1321	0.003753	16.7968	1321	0.026856	16.7969	1321	0.0155	16.7995	1321	0.991049	16.7609	1321	0.822496	16.7556	1321	0.860661	16.757
1322	0.003748	16.8034	1322	0.026807	16.8035	1322	0.015488	16.8061	1322	0.989957	16.7675	1322	0.817913	16.7622	1322	0.855981	16.7637
1323	0.003743	16.8101	1323	0.026761	16.8101	1323	0.015473	16.8128	1323	0.989243	16.7741	1323	0.813358	16.7689	1323	0.851264	16.7703
1324	0.00374	16.8167	1324	0.026706	16.8168	1324	0.015456	16.8194	1324	0.988466	16.7808	1324	0.80903	16.7755	1324	0.846336	16.7769
1325	0.003738	16.8235	1325	0.026645	16.8234	1325	0.015437	16.8261	1325	0.987506	16.7874	1325	0.804524	16.7822	1325	0.841282	16.7836
1326	0.003729	16.8302	1326	0.026586	16.83	1326	0.015409	16.8327	1326	0.986589	16.794	1326	0.799608	16.7888	1326	0.836564	16.7902
1327	0.003722	16.8368	1327	0.02654	16.8367	1327	0.015404	16.8393	1327	0.986687	16.8007	1327	0.794227	16.7954	1327	0.831612	16.7969
1328	0.003711	16.8435	1328	0.026492	16.8435	1328	0.015402	16.846	1328	0.986931	16.8075	1328	0.789695	16.8021	1328	0.827321	16.8035
1329	0.003695	16.8501	1329	0.026444	16.8502	1329	0.015389	16.8528	1329	0.98666	16.8142	1329	0.784927	16.8089	1329	0.822788	16.8103
1330	0.003686	16.8568	1330	0.026394	16.8568	1330	0.015382	16.8595	1330	0.986487	16.8208	1330	0.780459	16.8156	1330	0.818813	16.817
1331	0.003675	16.8634	1331	0.026355	16.8635	1331	0.015381	16.8661	1331	0.987465	16.8275	1331	0.775451	16.8222	1331	0.814579	16.8237
1332	0.003664	16.87	1332	0.026303	16.8701	1332	0.015365	16.8728	1332	0.987665	16.8341	1332	0.770754	16.8288	1332	0.810736	16.8303
1333	0.003657	16.8768	1333	0.026253	16.8767	1333	0.01535	16.8794	1333	0.987553	16.8407	1333	0.765756	16.8355	1333	0.806481	16.8369
1334	0.003649	16.8835	1334	0.026214	16.8834	1334	0.015337	16.886	1334	0.987474	16.8474	1334	0.761005	16.8421	1334	0.802618	16.8436
1335	0.003643	16.8902	1335	0.026174	16.8901	1335	0.015326	16.8927	1335	0.987591	16.854	1335	0.755728	16.8488	1335	0.798357	16.8502
1336	0.003642	16.8968	1336	0.026134	16.8969	1336	0.015315	16.8993	1336	0.988118	16.8609	1336	0.751147	16.8554	1336	0.794446	16.8568
1337	0.003642	16.9034	1337	0.026092	16.9035	1337	0.015296	16.9062	1337	0.987844	16.8675	1337	0.746466	16.8622	1337	0.790079	16.8637
1338	0.003642	16.9101	1338	0.026049	16.9102	1338	0.015275	16.9128	1338	0.987509	16.8742	1338	0.741944	16.8689	1338	0.78601	16.8703
1339	0.003645	16.9167	1339	0.026001	16.9168	1339	0.015266	16.9194	1339	0.986909	16.8808	1339	0.736995	16.8755	1339	0.781579	16.877
1340	0.003641	16.9233	1340	0.025956	16.9234	1340	0.015267	16.9261	1340	0.985827	16.8874	1340	0.732627	16.8822	1340	0.777495	16.8836
1341	0.003635	16.9301	1341	0.025912	16.9301	1341	0.015245	16.9327	1341	0.98555	16.8941	1341	0.727952	16.8888	1341	0.77291	16.8903
1342	0.003627	16.9368	1342	0.025873	16.9367	1342	0.015211	16.9394	1342	0.986689	16.9007	1342	0.723648	16.8954	1342	0.768775	16.8969
1343	0.003614	16.9435	1343	0.025826	16.9434	1343	0.015186	16.946	1343	0.987771	16.9073	1343	0.71894	16.9021	1343	0.764221	16.9035
1344	0.003606	16.9501	1344	0.025776	16.9502	1344	0.015167	16.9526	1344	0.988307	16.9142	1344	0.714605	16.9087	1344	0.759959	16.9102
1345	0.003598	16.9568	1345	0.025733	16.9568	1345	0.015144	16.9595	1345	0.988587	16.9208	1345	0.710234	16.9156	1345	0.755485	16.917
1346	0.003591	16.9634	1346	0.025683	16.9635	1346	0.015134	16.9661	1346	0.989682	16.9275	1346	0.705964	16.9222	1346	0.751062	16.9237
1347	0.003576	16.97	1347	0.025632	16.9701	1347	0.015128	16.9728	1347	0.990818	16.9341	1347	0.701527	16.9289	1347	0.746572	16.9303
1348	0.003559	16.9767	1348	0.025583	16.9767	1348	0.015112	16.9794	1348	0.992142	16.9408	1348	0.697043	16.9355	1348	0.741949	16.9369
1349	0.003545	16.9835	1349	0.025538	16.9834	1349	0.015079	16.9861	1349	0.99371	16.9474	1349	0.692466	16.9421	1349	0.737344	16.9436
1350	0.003534	16.9902	1350	0.025495	16.99	1350	0.01505	16.9927	1350	0.995105	16.954	1350	0.687605	16.9488	1350	0.732464	16.9502
1351	0.003524	16.9968	1351	0.025447	16.9967	1351	0.015035	16.9993	1351	0.996134	16.9607	1351	0.68312	16.9554	1351	0.727864	16.9569
1352	0.003515	17.0035	1352	0.025398	17.0035	1352	0.015033	17.006	1352	0.996641	16.9675	1352	0.678129	16.962	1352	0.722705	16.9635
1353	0.003506	17.0101	1353	0.025366	17.0102	1353	0.015026	17.0128	1353	0.997254	16.9742	1353	0.673545	16.9689	1353	0.718193	16.9703
1354	0.003491	17.0167	1354	0.02532	17.0168	1354	0.015013	17.0195	1354	0.998331	16.9808	1354	0.66842	16.9755	1354	0.713293	16.977
1355	0.00348	17.0234	1355	0.02527	17.0235	1355	0.015005	17.0261	1355	0.999364	16.9874	1355	0.663758	16.9822	1355	0.708983	16.9836
1356	0.003466	17.03	1356	0.02523	17.0301	1356	0.014978	17.0327	1356	0.999401	16.9941	1356	0.658698	16.9888	1356	0.704253	16.9903
1357	0.003452	17.0368	1357	0.025189	17.0367	1357	0.01495	17.0394	1357	0.999795	17.0007	1357	0.654055	16.9955	1357	0.69999	16.9969
1358	0.003443	17.0435	1358	0.025149	17.0434	1358	0.014935	17.046	1358	0.999824	17.0074	1358	0.648905	17.0021	1358	0.695246	17.0035
1359	0.003435	17.0501	1359	0.025111	17.05	1359	0.01494	17.0526	1359	0.999675	17.014	1359	0.644311	17.0087	1359	0.69092	17.0102
1360	0.003426	17.0568	1360	0.025071	17.0569	1360	0.014927	17.0593	1360	1	17.0209	1360	0.63933	17.0154	1360	0.686157	17.0168
1361	0.003417	17.0634	1361	0.025025	17.0635	1361	0.014906	17.0662	1361	0.999726	17.0275	1361	0.634825	17.0222	1361	0.681855	17.0236
1362	0.003411	17.0701	1362	0.024982	17.0701	1362	0.014892	17.0728	1362	0.999353	17.0342	1362	0.629982	17.0289	1362	0.677217	17.0303
1363	0.003404	17.0767	1363	0.024929	17.0768	1363	0.014887	17.0794	1363	0.999304	17.0408	1363	0.625561	17.0355	1363	0.672921	17.037
1364	0.003396	17.0833	1364	0.024886	17.0834	1364	0.014877	17.0861	1364	0.999287	17.0474	1364	0.620582	17.0421	1364	0.667775	17.0436
1365	0.003385	17.0901	1365	0.024849	17.0901	1365	0.014863	17.0927	1365	0.998233	17.0541	1365	0.61594	17.0488	1365	0.662919	17.0502
1366	0.003379	17.0968	1366	0.024811	17.0967	1366	0.014854	17.0993	1366	0.99694	17.0607	1366	0.611068	17.0554	1366	0.657726	17.0569
1367	0.003377	17.1035	1367	0.024777	17.1033	1367	0.014844	17.106	1367	0.996048	17.0673	1367	0.606468	17.0621	1367	0.652745	17.0635
1368	0.003376	17.1101	1368	0.024744	17.1102	1368	0.01483	17.1126	1368	0.995296	17.0742	1368	0.601692	17.0687	1368	0.64808	17.0701
1369	0.003368	17.1167	1369	0.024703	17.1168	1369	0.014806	17.1195	1369	0.993656	17.0808	1369	0.596864	17.0755	1369	0.643501	17.0769
1370	0.003362	17.1234	1370	0.024653	17.1235	1370	0.014796	17.1261	1370	0.991679	17.0875	1370	0.592117	17.0822	1370	0.639019	17.0836
1371	0.003355	17.13	1371	0.02463	17.1301	1371	0.01478	17.1328	1371	0.990078	17.0941	1371	0.587173	17.0888	1371	0.634425	17.0903
1372	0.003343	17.1367	1372	0.0246	17.1367	1372	0.014763	17.1394	1372	0.988097	17.1007	1372	0.582552	17.0955	1372	0.630155	17.0969
1373	0.003336	17.1434	1373	0.024562	17.1434	1373	0.014746	17.146	1373	0.985611	17.1074	1373	0.577659	17.1021	1373	0.62564	17.1035
1374	0.003329	17.1502	1374	0.024525	17.15	1374	0.014726	17.1527	1374	0.983003	17.114	1374	0.57362	17.1088	1374	0.621904	17.1102
1375	0.003322	17.1568	1375	0.024486	17.1567	1375	0.014711	17.1593	1375	0.981246	17.1207	1375	0.569303	17.1154	1375	0.617802	17.1168
1376	0.003316	17.1634	1376	0.024448	17.1635	1376	0.014701	17.1659	1376	0.97911	17.1275	1376	0.565486	17.122	1376	0.61417	17.1235
1377	0.003305	17.1701	1377	0.024411	17.1701	1377	0.014689	17.1728	1377	0.976078	17.1342	1377	0.561282	17.1289	1377	0.610149	17.1303
1378	0.003291	17.1767	1378	0.02437	17.1768	1378	0.014683	17.1795	1378	0.972855	17.1408	1378	0.557728	17.1355	1378	0.606102	17.137
1379	0.003278	17.1834	1379	0.024336	17.1834	1379	0.01468	17.1861	1379	0.970667	17.1474	1379	0.553721	17.1422	1379	0.601555	17.1436
1380	0.003273	17.19	1380	0.024311	17.1901	1380	0.014676	17.1927	1380	0.969241	17.1541	1380	0.550106	17.1488	1380	0.597435	17.1502
1381	0.003268	17.1967	1381	0.024272	17.1967	1381	0.014676	17.1994	1381	0.968292	17.1607	1381	0.545806	17.1555	1381	0.593009	17.1569
1382	0.003268	17.2035	1382	0.02424	17.2034	1382	0.014672	17.206	1382	0.967103	17.1674	1382	0.541952	17.1621	1382	0.588912	17.1635
1383	0.003271	17.2101	1383	0.02421	17.21	1383	0.014657	17.2127	1383	0.966011	17.174	1383	0.537737	17.1687	1383	0.584294	17.1702
1384	0.003263	17.2168	1384	0.024181	17.2169	1384	0.014648	17.2193	1384	0.966426	17.1809	1384	0.533808	17.1754	1384	0.58004	17.1768
1385	0.003258	17.2234	1385	0.024151	17.2235	1385	0.014642	17.2262	1385	0.967131	17.1875	1385	0.529368	17.1822	1385	0.57531	17.1836
1386	0.003257	17.23	1386	0.024116	17.2301	1386	0.014631	17.2328	1386	0.968519	17.1941	1386	0.525207	17.1889	1386	0.570946	17.1903
1387	0.003255	17.2367	1387	0.024077	17.2368	1387	0.014618	17.2394	1387	0.969976	17.2008	1387	0.520659	17.1955	1387	0.566447	17.1969
1388	0.003251	17.2433	1388	0.024038	17.2434	1388	0.014603	17.2461	1388	0.970762	17.2074	1388	0.516304	17.2021	1388	0.562405	17.2036
1389	0.003248	17.2501	1389	0.023999	17.25	1389	0.01458	17.2527	1389	0.971218	17.214	1389	0.51194	17.2088	1389	0.558159	17.2102
1390	0.003243	17.2568	1390	0.023959	17.2567	1390	0.014553	17.2593	1390	0.970362	17.2207	1390	0.507717	17.2154	1390	0.554157	17.2169
1391	0.003244	17.2635	1391	0.023917	17.2633	1391	0.014538	17.266	1391	0.968965	17.2273	1391	0.503889	17.222	1391	0.549746	17.2235
1392	0.003241	17.2701	1392	0.02387	17.2702	1392	0.014538	17.2726	1392	0.969153	17.2342	1392	0.499996	17.2287	1392	0.545539	17.2301
1393	0.003229	17.2767	1393	0.023827	17.2768	1393	0.014537	17.2795	1393	0.970246	17.2408	1393	0.496117	17.2355	1393	0.541354	17.2369
1394	0.003231	17.2834	1394	0.023785	17.2835	1394	0.01453	17.2861	1394	0.969004	17.2475	1394	0.491993	17.2422	1394	0.537271	17.2436
1395	0.003228	17.29	1395	0.023742	17.2901	1395	0.014524	17.2928	1395	0.96659	17.2541	1395	0.488192	17.2488	1395	0.533619	17.2503
1396	0.003218	17.2966	1396	0.023706	17.2967	1396	0.014511	17.2994	1396	0.964011	17.2607	1396	0.484052	17.2555	1396	0.529945	17.2569
1397	0.003207	17.3034	1397	0.023672	17.3034	1397	0.014503	17.306	1397	0.961638	17.2674	1397	0.480398	17.2621	1397	0.526078	17.2635
1398	0.003198	17.3102	1398	0.02364	17.31	1398	0.014495	17.3127	1398	0.960138	17.274	1398	0.476309	17.2688	1398	0.521931	17.2702
1399	0.003193	17.3168	1399	0.023602	17.3166	1399	0.014483	17.3193	1399	0.959303	17.2806	1399	0.472704	17.2754	1399	0.518269	17.2768
1400	0.003189	17.3234	1400	0.023575	17.3235	1400	0.014476	17.3259	1400	0.959447	17.2875	1400	0.468606	17.282	1400	0.514467	17.2835
1401	0.003183	17.3301	1401	0.023546	17.3301	1401	0.014463	17.3328	1401	0.959981	17.2941	1401	0.465006	17.2888	1401	0.511093	17.2902
1402	0.003179	17.3367	1402	0.023511	17.3368	1402	0.014431	17.3394	1402	0.959455	17.3008	1402	0.461094	17.2955	1402	0.507398	17.297
1403	0.003176	17.3434	1403	0.023488	17.3434	1403	0.01442	17.3461	1403	0.957114	17.3074	1403	0.457814	17.3022	1403	0.503993	17.3036
1404	0.003171	17.35	1404	0.023463	17.35	1404	0.014411	17.3527	1404	0.955721	17.3141	1404	0.453918	17.3088	1404	0.500179	17.3102
1405	0.003167	17.3567	1405	0.023441	17.3567	1405	0.014387	17.3593	1405	0.954613	17.3207	1405	0.450491	17.3154	1405	0.496527	17.3169
1406	0.003165	17.3635	1406	0.023425	17.3633	1406	0.014384	17.366	1406	0.953366	17.3273	1406	0.446868	17.3221	1406	0.492563	17.3235
1407	0.003166	17.3701	1407	0.023393	17.37	1407	0.014377	17.3726	1407	0.950412	17.334	1407	0.443578	17.3287	1407	0.489296	17.3301
1408	0.003171	17.3768	1408	0.023365	17.3768	1408	0.014359	17.3792	1408	0.947167	17.3408	1408	0.440115	17.3353	1408	0.485998	17.3368
1409	0.003166	17.3834	1409	0.023349	17.3835	1409	0.014339	17.3861	1409	0.943062	17.3475	1409	0.436737	17.3422	1409	0.48288	17.3436
1410	0.003154	17.39	1410	0.023318	17.3901	1410	0.014333	17.3928	1410	0.93887	17.3541	1410	0.433457	17.3488	1410	0.479266	17.3503
1411	0.003143	17.3967	1411	0.023286	17.3967	1411	0.014326	17.3994	1411	0.934433	17.3608	1411	0.430084	17.3555	1411	0.476043	17.3569
1412	0.003133	17.4033	1412	0.023265	17.4034	1412	0.014325	17.406	1412	0.929927	17.3674	1412	0.426642	17.3621	1412	0.472213	17.3636
1413	0.003128	17.41	1413	0.02323	17.41	1413	0.014309	17.4127	1413	0.926631	17.374	1413	0.422968	17.3687	1413	0.468837	17.3702
1414	0.003125	17.4168	1414	0.023191	17.4167	1414	0.0143	17.4193	1414	0.923476	17.3807	1414	0.419766	17.3754	1414	0.465561	17.3769
1415	0.003114	17.4234	1415	0.023156	17.4233	1415	0.014306	17.426	1415	0.920782	17.3873	1415	0.416222	17.382	1415	0.46253	17.3835
1416	0.003104	17.4301	1416	0.023119	17.4302	1416	0.014306	17.4326	1416	0.917842	17.3942	1416	0.412956	17.3887	1416	0.459291	17.3901
1417	0.003096	17.4367	1417	0.023087	17.4368	1417	0.014302	17.4395	1417	0.916335	17.4008	1417	0.409361	17.3955	1417	0.456111	17.3969
1418	0.003088	17.4433	1418	0.023069	17.4434	1418	0.014301	17.4461	1418	0.914968	17.4075	1418	0.406243	17.4022	1418	0.45238	17.4036
1419	0.003083	17.45	1419	0.023043	17.4501	1419	0.01431	17.4527	1419	0.91388	17.4141	1419	0.402841	17.4088	1419	0.448606	17.4103
1420	0.003074	17.4566	1420	0.023007	17.4567	1420	0.014298	17.4594	1420	0.912675	17.4207	1420	0.399829	17.4154	1420	0.445067	17.4169
1421	0.003061	17.4633	1421	0.022986	17.4634	1421	0.014286	17.466	1421	0.91147	17.4274	1421	0.396565	17.4221	1421	0.441447	17.4235
1422	0.003052	17.4701	1422	0.022966	17.47	1422	0.014281	17.4726	1422	0.909722	17.434	1422	0.393789	17.4287	1422	0.438536	17.4302
1423	0.003039	17.4768	1423	0.022944	17.4766	1423	0.014282	17.4793	1423	0.907481	17.4406	1423	0.390751	17.4354	1423	0.435454	17.4368
1424	0.003029	17.4834	1424	0.022924	17.4835	1424	0.014267	17.4859	1424	0.90455	17.4475	1424	0.388115	17.442	1424	0.432482	17.4434
1425	0.003028	17.4901	1425	0.022899	17.4901	1425	0.014248	17.4928	1425	0.902027	17.4541	1425	0.385001	17.4488	1425	0.429152	17.4502
1426	0.003018	17.4967	1426	0.022869	17.4968	1426	0.014223	17.4994	1426	0.899956	17.4608	1426	0.382124	17.4555	1426	0.426219	17.4569
1427	0.003011	17.5033	1427	0.022847	17.5034	1427	0.014216	17.5061	1427	0.897928	17.4674	1427	0.378968	17.4622	1427	0.422978	17.4636
1428	0.003005	17.51	1428	0.022819	17.51	1428	0.014213	17.5127	1428	0.896311	17.4741	1428	0.375942	17.4688	1428	0.420386	17.4702
1429	0.002996	17.5166	1429	0.022796	17.5167	1429	0.01421	17.5193	1429	0.894875	17.4807	1429	0.372767	17.4754	1429	0.417509	17.4768
1430	0.002993	17.5235	1430	0.022787	17.5233	1430	0.014205	17.526	1430	0.89419	17.4873	1430	0.369599	17.4821	1430	0.414829	17.4835
1431	0.002992	17.5301	1431	0.022754	17.5299	1431	0.014191	17.5326	1431	0.893948	17.494	1431	0.366321	17.4887	1431	0.411615	17.4901
1432	0.002989	17.5367	1432	0.022723	17.5368	1432	0.014178	17.5392	1432	0.892245	17.5008	1432	0.362931	17.4953	1432	0.408599	17.4968
1433	0.002985	17.5434	1433	0.022697	17.5435	1433	0.014166	17.5461	1433	0.890548	17.5075	1433	0.35972	17.5021	1433	0.40532	17.5035
1434	0.002978	17.55	1434	0.022676	17.5501	1434	0.014153	17.5527	1434	0.889248	17.5141	1434	0.356359	17.5088	1434	0.402308	17.5103
1435	0.002965	17.5567	1435	0.022655	17.5567	1435	0.014147	17.5594	1435	0.88787	17.5207	1435	0.353458	17.5155	1435	0.398924	17.5169
1436	0.002959	17.5633	1436	0.022632	17.5634	1436	0.014137	17.566	1436	0.885741	17.5274	1436	0.350352	17.5221	1436	0.395753	17.5235
1437	0.002949	17.57	1437	0.022614	17.57	1437	0.014106	17.5726	1437	0.883337	17.534	1437	0.347544	17.5287	1437	0.392516	17.5302
1438	0.002938	17.5768	1438	0.022598	17.5766	1438	0.014082	17.5793	1438	0.880333	17.5406	1438	0.344505	17.5354	1438	0.389434	17.5368
1439	0.002933	17.5834	1439	0.022573	17.5833	1439	0.014064	17.5859	1439	0.877199	17.5473	1439	0.341813	17.542	1439	0.386311	17.5435
1440	0.002933	17.5901	1440	0.022544	17.5901	1440	0.014055	17.5926	1440	0.873324	17.5541	1440	0.338895	17.5486	1440	0.383284	17.5501
1441	0.002929	17.5967	1441	0.022528	17.5968	1441	0.014048	17.5994	1441	0.869254	17.5608	1441	0.336383	17.5555	1441	0.380439	17.5568
1442	0.002925	17.6033	1442	0.022497	17.6034	1442	0.01404	17.6061	1442	0.867631	17.5674	1442	0.333758	17.5622	1442	0.377443	17.5636
1443	0.002927	17.61	1443	0.022471	17.6101	1443	0.014023	17.6127	1443	0.86649	17.574	1443	0.331373	17.5688	1443	0.374413	17.5703
1444	0.002926	17.6166	1444	0.022449	17.6167	1444	0.01401	17.6193	1444	0.865234	17.5807	1444	0.328703	17.5755	1444	0.371134	17.5769
1445	0.002924	17.6233	1445	0.022434	17.6233	1445	0.013995	17.626	1445	0.863615	17.5873	1445	0.326307	17.5821	1445	0.368284	17.5835
1446	0.002922	17.6301	1446	0.022419	17.63	1446	0.013982	17.6326	1446	0.862232	17.594	1446	0.323669	17.5887	1446	0.365177	17.5902
1447	0.00292	17.6368	1447	0.0224	17.6366	1447	0.013979	17.6393	1447	0.860505	17.6006	1447	0.321281	17.5953	1447	0.362244	17.5968
1448	0.002917	17.6434	1448	0.022367	17.6435	1448	0.01397	17.6459	1448	0.858892	17.6075	1448	0.318559	17.602	1448	0.35901	17.6034
1449	0.00291	17.65	1449	0.022327	17.6501	1449	0.013959	17.6528	1449	0.857158	17.6141	1449	0.316048	17.6088	1449	0.356082	17.6102
1450	0.002893	17.6567	1450	0.022302	17.6567	1450	0.013945	17.6594	1450	0.855878	17.6207	1450	0.313315	17.6155	1450	0.352873	17.6169
1451	0.002886	17.6633	1451	0.022285	17.6634	1451	0.013938	17.666	1451	0.8557	17.6274	1451	0.310694	17.6221	1451	0.350104	17.6236
1452	0.002875	17.6699	1452	0.022283	17.67	1452	0.013931	17.6727	1452	0.855212	17.634	1452	0.307834	17.6288	1452	0.347232	17.6302
1453	0.002859	17.6766	1453	0.02228	17.6767	1453	0.013926	17.6793	1453	0.854345	17.6407	1453	0.30505	17.6354	1453	0.344747	17.6368
1454	0.002847	17.6835	1454	0.022274	17.6833	1454	0.01393	17.686	1454	0.853682	17.6473	1454	0.302255	17.642	1454	0.342102	17.6435
1455	0.002837	17.6901	1455	0.022262	17.6899	1455	0.013926	17.6926	1455	0.852688	17.6539	1455	0.299462	17.6487	1455	0.339729	17.6501
1456	0.002831	17.6967	1456	0.022247	17.6968	1456	0.013925	17.6992	1456	0.852004	17.6608	1456	0.296761	17.6553	1456	0.337279	17.6567
1457	0.002827	17.7034	1457	0.022237	17.7034	1457	0.013925	17.7061	1457	0.851042	17.6674	1457	0.294013	17.6621	1457	0.335067	17.6635
1458	0.002821	17.71	1458	0.022233	17.7101	1458	0.013919	17.7127	1458	0.850121	17.6741	1458	0.291688	17.6688	1458	0.332492	17.6703
1459	0.002818	17.7166	1459	0.022245	17.7167	1459	0.013929	17.7194	1459	0.848047	17.6807	1459	0.289283	17.6755	1459	0.330085	17.6769
1460	0.002818	17.7233	1460	0.022241	17.7233	1460	0.013931	17.726	1460	0.84555	17.6873	1460	0.287171	17.6821	1460	0.327517	17.6835
1461	0.002814	17.7299	1461	0.022226	17.73	1461	0.013922	17.7326	1461	0.842946	17.694	1461	0.284846	17.6887	1461	0.324959	17.6902
1462	0.002811	17.7368	1462	0.022206	17.7366	1462	0.013916	17.7393	1462	0.840588	17.7006	1462	0.282796	17.6954	1462	0.32228	17.6968
1463	0.002808	17.7434	1463	0.022184	17.7433	1463	0.013917	17.7459	1463	0.837313	17.7073	1463	0.280491	17.702	1463	0.319528	17.7035
1464	0.002802	17.7501	1464	0.022155	17.7501	1464	0.013916	17.7526	1464	0.833748	17.7141	1464	0.278481	17.7086	1464	0.316866	17.7101
1465	0.002794	17.7567	1465	0.022126	17.7568	1465	0.013909	17.7594	1465	0.830303	17.7208	1465	0.276257	17.7154	1465	0.31406	17.7168
1466	0.002788	17.7633	1466	0.022107	17.7634	1466	0.013885	17.7661	1466	0.826543	17.7274	1466	0.274303	17.7221	1466	0.311469	17.7236
1467	0.002778	17.77	1467	0.022079	17.77	1467	0.013873	17.7727	1467	0.823695	17.734	1467	0.272118	17.7288	1467	0.308761	17.7302
1468	0.00277	17.7766	1468	0.022053	17.7767	1468	0.013875	17.7793	1468	0.820931	17.7407	1468	0.270078	17.7354	1468	0.306622	17.7369
1469	0.002762	17.7833	1469	0.022026	17.7833	1469	0.01386	17.786	1469	0.819713	17.7473	1469	0.267763	17.742	1469	0.304204	17.7435
1470	0.002753	17.7901	1470	0.022002	17.79	1470	0.013854	17.7926	1470	0.818989	17.7539	1470	0.265686	17.7487	1470	0.302144	17.7501
1471	0.002742	17.7967	1471	0.021986	17.7966	1471	0.013851	17.7992	1471	0.817174	17.7606	1471	0.263225	17.7553	1471	0.299626	17.7568
1472	0.002733	17.8034	1472	0.021972	17.8035	1472	0.013833	17.8059	1472	0.8139	17.7674	1472	0.260988	17.762	1472	0.297487	17.7634
1473	0.002726	17.81	1473	0.021956	17.8101	1473	0.013814	17.8128	1473	0.811581	17.7741	1473	0.258692	17.7687	1473	0.295154	17.7701
1474	0.002719	17.8166	1474	0.021941	17.8167	1474	0.013799	17.8194	1474	0.809189	17.7807	1474	0.256543	17.7755	1474	0.293156	17.7769
1475	0.002709	17.8233	1475	0.021931	17.8234	1475	0.013797	17.826	1475	0.807439	17.7874	1475	0.254317	17.7821	1475	0.291068	17.7835
1476	0.002703	17.8299	1476	0.02192	17.83	1476	0.013811	17.8327	1476	0.807435	17.794	1476	0.252122	17.7887	1476	0.289092	17.7902
1477	0.002692	17.8366	1477	0.021904	17.8366	1477	0.013815	17.8393	1477	0.8074	17.8007	1477	0.249935	17.7954	1477	0.286822	17.7968
1478	0.002681	17.8434	1478	0.021887	17.8433	1478	0.013811	17.8459	1478	0.807186	17.8073	1478	0.247687	17.802	1478	0.284649	17.8035
1479	0.002675	17.8501	1479	0.021872	17.8499	1479	0.013807	17.8526	1479	0.806812	17.8139	1479	0.245437	17.8087	1479	0.282417	17.8101
1480	0.002669	17.8567	1480	0.021862	17.8568	1480	0.013799	17.8592	1480	0.805747	17.8208	1480	0.243052	17.8153	1480	0.280268	17.8167
1481	0.002662	17.8633	1481	0.021848	17.8634	1481	0.013795	17.8661	1481	0.804866	17.8274	1481	0.241035	17.8221	1481	0.278361	17.8234
1482	0.002651	17.87	1482	0.02183	17.8701	1482	0.013798	17.8727	1482	0.804346	17.8341	1482	0.238877	17.8288	1482	0.276354	17.8302
1483	0.002641	17.8766	1483	0.021811	17.8767	1483	0.013783	17.8793	1483	0.803537	17.8407	1483	0.23685	17.8354	1483	0.274375	17.8369
1484	0.002634	17.8833	1484	0.021793	17.8833	1484	0.013793	17.886	1484	0.803124	17.8473	1484	0.23463	17.8421	1484	0.272124	17.8435
1485	0.002632	17.8899	1485	0.021775	17.89	1485	0.013796	17.8926	1485	0.802665	17.854	1485	0.232646	17.8487	1485	0.269959	17.8501
1486	0.002626	17.8968	1486	0.021759	17.8966	1486	0.013785	17.8993	1486	0.800089	17.8606	1486	0.230505	17.8554	1486	0.267621	17.8568
1487	0.002623	17.9034	1487	0.021752	17.9032	1487	0.013766	17.9059	1487	0.796929	17.8673	1487	0.228617	17.862	1487	0.265524	17.8634
1488	0.002621	17.91	1488	0.02175	17.9101	1488	0.013741	17.9125	1488	0.79404	17.8741	1488	0.226524	17.8686	1488	0.263247	17.87
1489	0.002612	17.9167	1489	0.021741	17.9168	1489	0.013715	17.9194	1489	0.791334	17.8808	1489	0.224777	17.8754	1489	0.261158	17.8767
1490	0.002608	17.9233	1490	0.021729	17.9234	1490	0.013697	17.9261	1490	0.78901	17.8874	1490	0.222976	17.8821	1490	0.258713	17.8835
1491	0.002604	17.9299	1491	0.021721	17.93	1491	0.013691	17.9327	1491	0.786758	17.894	1491	0.221403	17.8888	1491	0.256505	17.8902
1492	0.002601	17.9366	1492	0.021713	17.9367	1492	0.013681	17.9393	1492	0.78539	17.9007	1492	0.219619	17.8954	1492	0.25404	17.8968
1493	0.002595	17.9432	1493	0.021709	17.9433	1493	0.013674	17.946	1493	0.784464	17.9073	1493	0.218036	17.902	1493	0.251878	17.9034
1494	0.002587	17.9501	1494	0.021709	17.9499	1494	0.013645	17.9526	1494	0.783589	17.9139	1494	0.216283	17.9087	1494	0.249806	17.9101
1495	0.002579	17.9567	1495	0.021701	17.9566	1495	0.013626	17.9593	1495	0.782928	17.9206	1495	0.21463	17.9153	1495	0.247912	17.9167
1496	0.002568	17.9634	1496	0.02169	17.9635	1496	0.013618	17.9659	1496	0.78293	17.9274	1496	0.212957	17.922	1496	0.245705	17.9234
1497	0.002558	17.97	1497	0.021679	17.9701	1497	0.013611	17.9728	1497	0.78295	17.9341	1497	0.211329	17.9287	1497	0.243669	17.9301
1498	0.002552	17.9766	1498	0.021671	17.9767	1498	0.013615	17.9794	1498	0.78285	17.9407	1498	0.209779	17.9355	1498	0.241408	17.9369
1499	0.002548	17.9833	1499	0.021667	17.9834	1499	0.013615	17.986	1499	0.78183	17.9474	1499	0.208159	17.9421	1499	0.23927	17.9435
1500	0.00254	17.9899	1500	0.021652	17.99	1500	0.013607	17.9927	1500	0.780802	17.954	1500	0.206478	17.9487	1500	0.237396	17.9501
1501	0.002531	17.9966	1501	0.021626	17.9966	1501	0.013611	17.9993	1501	0.779412	17.9606	1501	0.204609	17.9554	1501	0.235533	17.9568
1502	0.002525	18.0034	1502	0.021611	18.0033	1502	0.013612	18.0059	1502	0.777979	17.9673	1502	0.202926	17.962	1502	0.233822	17.9634
1503	0.002524	18.0101	1503	0.021594	18.0099	1503	0.013616	18.0126	1503	0.776357	17.9739	1503	0.201079	17.9686	1503	0.232004	17.9701
1504	0.002518	18.0167	1504	0.021578	18.0168	1504	0.013612	18.0192	1504	0.774699	17.9807	1504	0.199459	17.9753	1504	0.230256	17.9767
1505	0.002515	18.0233	1505	0.021569	18.0234	1505	0.013603	18.0261	1505	0.772424	17.9874	1505	0.19765	17.982	1505	0.228436	17.9834
1506	0.002513	18.03	1506	0.021547	18.03	1506	0.013592	18.0327	1506	0.77004	17.994	1506	0.195995	17.9888	1506	0.226987	17.9902
1507	0.002506	18.0366	1507	0.021526	18.0367	1507	0.013587	18.0393	1507	0.76834	18.0007	1507	0.194174	17.9954	1507	0.225439	17.9968
1508	0.002504	18.0432	1508	0.021501	18.0433	1508	0.013586	18.046	1508	0.766686	18.0073	1508	0.192514	18.0021	1508	0.224183	18.0035
1509	0.002497	18.0499	1509	0.021471	18.05	1509	0.013595	18.0526	1509	0.765473	18.014	1509	0.190681	18.0087	1509	0.222711	18.0101
1510	0.002484	18.0567	1510	0.021458	18.0566	1510	0.013599	18.0593	1510	0.764083	18.0206	1510	0.189096	18.0153	1510	0.221301	18.0168
1511	0.002479	18.0634	1511	0.021461	18.0632	1511	0.013572	18.0659	1511	0.76267	18.0272	1511	0.187491	18.022	1511	0.219449	18.0234
1512	0.002471	18.07	1512	0.021462	18.0701	1512	0.013569	18.0725	1512	0.760991	18.0341	1512	0.186051	18.0286	1512	0.21783	18.03
1513	0.002457	18.0767	1513	0.021459	18.0767	1513	0.013562	18.0794	1513	0.759245	18.0407	1513	0.1844	18.0353	1513	0.216157	18.0367
1514	0.002449	18.0833	1514	0.021454	18.0834	1514	0.013559	18.086	1514	0.757375	18.0474	1514	0.182882	18.0421	1514	0.21459	18.0435
1515	0.002439	18.0899	1515	0.021441	18.09	1515	0.013562	18.0927	1515	0.755945	18.054	1515	0.181358	18.0487	1515	0.212856	18.0502
1516	0.002427	18.0966	1516	0.021435	18.0967	1516	0.013564	18.0993	1516	0.754671	18.0606	1516	0.179902	18.0554	1516	0.211239	18.0568
1517	0.00242	18.1032	1517	0.021431	18.1033	1517	0.013566	18.1059	1517	0.752822	18.0673	1517	0.178414	18.062	1517	0.209335	18.0634
1518	0.002411	18.1101	1518	0.021425	18.1099	1518	0.013555	18.1126	1518	0.750042	18.0739	1518	0.176963	18.0687	1518	0.207576	18.0701
1519	0.002402	18.1167	1519	0.021419	18.1166	1519	0.013525	18.1192	1519	0.747672	18.0806	1519	0.175618	18.0753	1519	0.205822	18.0767
1520	0.002398	18.1234	1520	0.02141	18.1234	1520	0.013504	18.1258	1520	0.745768	18.0874	1520	0.174221	18.0819	1520	0.204147	18.0834
1521	0.002389	18.13	1521	0.0214	18.1301	1521	0.013499	18.1327	1521	0.744087	18.0941	1521	0.17294	18.0887	1521	0.202768	18.0901
1522	0.002383	18.1366	1522	0.021387	18.1367	1522	0.01349	18.1394	1522	0.741604	18.1007	1522	0.171611	18.0954	1522	0.201333	18.0969
1523	0.002374	18.1433	1523	0.021382	18.1433	1523	0.013482	18.146	1523	0.739289	18.1074	1523	0.170496	18.1021	1523	0.199944	18.1035
1524	0.002364	18.1499	1524	0.021383	18.15	1524	0.013476	18.1526	1524	0.737937	18.114	1524	0.169262	18.1087	1524	0.198487	18.1102
1525	0.002353	18.1566	1525	0.021381	18.1566	1525	0.013465	18.1593	1525	0.736564	18.1206	1525	0.168103	18.1153	1525	0.197039	18.1168
1526	0.002349	18.1634	1526	0.021384	18.1633	1526	0.013453	18.1659	1526	0.733846	18.1273	1526	0.166797	18.122	1526	0.195361	18.1234
1527	0.002342	18.17	1527	0.021388	18.1699	1527	0.013444	18.1725	1527	0.731528	18.1339	1527	0.165623	18.1286	1527	0.193902	18.1301
1528	0.002328	18.1767	1528	0.021386	18.1768	1528	0.013439	18.1792	1528	0.729806	18.1407	1528	0.164323	18.1352	1528	0.192254	18.1367
1529	0.002323	18.1833	1529	0.021389	18.1834	1529	0.013452	18.186	1529	0.727956	18.1474	1529	0.16312	18.142	1529	0.190755	18.1434
1530	0.002318	18.1899	1530	0.021403	18.19	1530	0.013465	18.1927	1530	0.724975	18.154	1530	0.161792	18.1487	1530	0.189082	18.1502
1531	0.002312	18.1966	1531	0.021405	18.1967	1531	0.013469	18.1993	1531	0.721901	18.1607	1531	0.160514	18.1554	1531	0.187537	18.1568
1532	0.002303	18.2032	1532	0.021405	18.2033	1532	0.01346	18.206	1532	0.72025	18.1673	1532	0.159064	18.162	1532	0.185822	18.1635
1533	0.002304	18.2099	1533	0.021407	18.21	1533	0.013451	18.2126	1533	0.718754	18.174	1533	0.157776	18.1687	1533	0.184215	18.1701
1534	0.002302	18.2167	1534	0.021419	18.2166	1534	0.013446	18.2192	1534	0.71723	18.1806	1534	0.156397	18.1753	1534	0.182427	18.1767
1535	0.002296	18.2234	1535	0.02143	18.2232	1535	0.013444	18.2259	1535	0.716237	18.1872	1535	0.155178	18.182	1535	0.180866	18.1834
1536	0.002286	18.23	1536	0.021443	18.2301	1536	0.013447	18.2325	1536	0.716653	18.194	1536	0.15393	18.1886	1536	0.179317	18.19
1537	0.002279	18.2366	1537	0.021451	18.2367	1537	0.013454	18.2394	1537	0.717204	18.2007	1537	0.152797	18.1953	1537	0.177936	18.1967
1538	0.002275	18.2433	1538	0.021457	18.2434	1538	0.013453	18.246	1538	0.717573	18.2074	1538	0.151801	18.2021	1538	0.176642	18.2035
1539	0.002266	18.2499	1539	0.021464	18.25	1539	0.013445	18.2526	1539	0.717376	18.214	1539	0.150878	18.2087	1539	0.175435	18.2102
1540	0.002255	18.2566	1540	0.021462	18.2566	1540	0.013436	18.2593	1540	0.718031	18.2206	1540	0.149828	18.2154	1540	0.174344	18.2168
1541	0.002246	18.2632	1541	0.021464	18.2633	1541	0.013421	18.2659	1541	0.71895	18.2273	1541	0.148759	18.222	1541	0.173301	18.2234
1542	0.002238	18.2701	1542	0.021464	18.2699	1542	0.013414	18.2726	1542	0.719375	18.2339	1542	0.14783	18.2286	1542	0.172264	18.2301
1543	0.002224	18.2767	1543	0.021461	18.2765	1543	0.01342	18.2792	1543	0.719121	18.2405	1543	0.146892	18.2353	1543	0.171186	18.2367
1544	0.002218	18.2833	1544	0.021445	18.2834	1544	0.013415	18.2858	1544	0.718008	18.2474	1544	0.145978	18.2419	1544	0.170074	18.2433
1545	0.002216	18.29	1545	0.021442	18.2901	1545	0.013411	18.2927	1545	0.715905	18.2541	1545	0.144996	18.2486	1545	0.168854	18.25
1546	0.002209	18.2966	1546	0.02144	18.2967	1546	0.013404	18.2993	1546	0.713724	18.2607	1546	0.144103	18.2554	1546	0.167672	18.2569
1547	0.002197	18.3032	1547	0.021437	18.3033	1547	0.01338	18.306	1547	0.711669	18.2673	1547	0.143155	18.2621	1547	0.166378	18.2635
1548	0.002185	18.3099	1548	0.021448	18.31	1548	0.013363	18.3126	1548	0.710083	18.274	1548	0.142082	18.2687	1548	0.165117	18.2701
1549	0.002173	18.3165	1549	0.021455	18.3166	1549	0.013351	18.3193	1549	0.708935	18.2806	1549	0.140869	18.2753	1549	0.1638	18.2768
1550	0.002166	18.3234	1550	0.021458	18.3232	1550	0.01334	18.3259	1550	0.707772	18.2872	1550	0.139894	18.282	1550	0.16254	18.2834
1551	0.00216	18.33	1551	0.021464	18.3299	1551	0.013333	18.3325	1551	0.707021	18.2939	1551	0.138867	18.2886	1551	0.161219	18.2901
1552	0.002156	18.3367	1552	0.021477	18.3367	1552	0.013331	18.3392	1552	0.706497	18.3007	1552	0.137901	18.2952	1552	0.160042	18.2967
1553	0.002152	18.3433	1553	0.021485	18.3434	1553	0.013324	18.346	1553	0.705757	18.3074	1553	0.136907	18.302	1553	0.158753	18.3033
1554	0.002147	18.3499	1554	0.02149	18.35	1554	0.013311	18.3527	1554	0.704899	18.314	1554	0.136081	18.3088	1554	0.157742	18.3102
1555	0.002138	18.3566	1555	0.021494	18.3566	1555	0.013297	18.3593	1555	0.704255	18.3207	1555	0.135199	18.3154	1555	0.156815	18.3168
1556	0.002129	18.3632	1556	0.021499	18.3633	1556	0.013277	18.3659	1556	0.703476	18.3273	1556	0.134419	18.322	1556	0.155985	18.3235
1557	0.002128	18.3699	1557	0.021505	18.3699	1557	0.013259	18.3726	1557	0.702363	18.3339	1557	0.133496	18.3287	1557	0.154928	18.3301
1558	0.002131	18.3767	1558	0.021504	18.3766	1558	0.013248	18.3792	1558	0.701142	18.3406	1558	0.132726	18.3353	1558	0.153954	18.3367
1559	0.00213	18.3834	1559	0.021511	18.3832	1559	0.013226	18.3859	1559	0.699887	18.3472	1559	0.131816	18.3419	1559	0.152965	18.3434
1560	0.002126	18.39	1560	0.021516	18.3901	1560	0.013202	18.3925	1560	0.698421	18.354	1560	0.130986	18.3486	1560	0.152041	18.35
1561	0.002123	18.3966	1561	0.021519	18.3967	1561	0.013186	18.3994	1561	0.696299	18.3607	1561	0.130187	18.3553	1561	0.151196	18.3567
1562	0.002115	18.4033	1562	0.021518	18.4033	1562	0.013157	18.406	1562	0.693663	18.3673	1562	0.129397	18.3621	1562	0.150458	18.3635
1563	0.002104	18.4099	1563	0.021526	18.41	1563	0.013125	18.4126	1563	0.692066	18.374	1563	0.128584	18.3687	1563	0.149757	18.3702
1564	0.002093	18.4165	1564	0.021536	18.4166	1564	0.013107	18.4193	1564	0.691323	18.3806	1564	0.127777	18.3754	1564	0.149054	18.3768
1565	0.00209	18.4232	1565	0.02154	18.4233	1565	0.013082	18.4259	1565	0.690629	18.3873	1565	0.12696	18.382	1565	0.148122	18.3834
1566	0.002092	18.43	1566	0.02155	18.4299	1566	0.013053	18.4326	1566	0.689275	18.3939	1566	0.126098	18.3886	1566	0.147218	18.3901
1567	0.002093	18.4367	1567	0.021568	18.4365	1567	0.013028	18.4392	1567	0.68792	18.4005	1567	0.125352	18.3953	1567	0.146547	18.3967
1568	0.002087	18.4433	1568	0.021588	18.4434	1568	0.012997	18.4458	1568	0.685884	18.4073	1568	0.124558	18.4019	1568	0.145856	18.4033
1569	0.002083	18.45	1569	0.021596	18.45	1569	0.012988	18.4527	1569	0.684111	18.414	1569	0.123975	18.4086	1569	0.145099	18.41
1570	0.002079	18.4566	1570	0.021599	18.4567	1570	0.012976	18.4593	1570	0.68362	18.4207	1570	0.123327	18.4154	1570	0.144266	18.4169
1571	0.00207	18.4632	1571	0.021606	18.4633	1571	0.012952	18.466	1571	0.683381	18.4273	1571	0.122714	18.422	1571	0.143387	18.4235
1572	0.002068	18.4699	1572	0.021613	18.4699	1572	0.012913	18.4726	1572	0.68339	18.4339	1572	0.122038	18.4287	1572	0.142465	18.4301
1573	0.002063	18.4765	1573	0.021624	18.4766	1573	0.012896	18.4793	1573	0.68307	18.4406	1573	0.121353	18.4353	1573	0.141579	18.4368
1574	0.002058	18.4834	1574	0.021625	18.4832	1574	0.01288	18.4859	1574	0.682467	18.4472	1574	0.120512	18.4419	1574	0.140587	18.4434
1575	0.002053	18.49	1575	0.021632	18.4899	1575	0.012858	18.4925	1575	0.682124	18.4538	1575	0.119781	18.4486	1575	0.139734	18.45
1576	0.002043	18.4966	1576	0.021638	18.4967	1576	0.012845	18.4992	1576	0.682325	18.4606	1576	0.119027	18.4552	1576	0.138763	18.4567
1577	0.002033	18.5033	1577	0.021632	18.5034	1577	0.012845	18.506	1577	0.682586	18.4673	1577	0.118343	18.4619	1577	0.137804	18.4633
1578	0.002027	18.5099	1578	0.021626	18.51	1578	0.012847	18.5127	1578	0.683524	18.474	1578	0.117609	18.4687	1578	0.136699	18.4702
1579	0.002025	18.5165	1579	0.021629	18.5166	1579	0.012833	18.5193	1579	0.684351	18.4806	1579	0.116941	18.4753	1579	0.135757	18.4768
1580	0.002022	18.5232	1580	0.021648	18.5233	1580	0.012811	18.5259	1580	0.684046	18.4873	1580	0.116212	18.482	1580	0.134935	18.4835
1581	0.00202	18.5298	1581	0.02166	18.5299	1581	0.012797	18.5326	1581	0.683693	18.4939	1581	0.115528	18.4886	1581	0.134126	18.4901
1582	0.002017	18.5367	1582	0.021669	18.5365	1582	0.012803	18.5392	1582	0.682786	18.5006	1582	0.114794	18.4953	1582	0.133134	18.4967
1583	0.002018	18.5433	1583	0.021671	18.5432	1583	0.012778	18.5458	1583	0.681199	18.5072	1583	0.114142	18.5019	1583	0.132244	18.5034
1584	0.002017	18.55	1584	0.021683	18.55	1584	0.012764	18.5525	1584	0.678704	18.514	1584	0.113514	18.5085	1584	0.13153	18.51
1585	0.002012	18.5566	1585	0.021686	18.5567	1585	0.012759	18.5593	1585	0.675585	18.5207	1585	0.112899	18.5152	1585	0.130932	18.5166
1586	0.00201	18.5633	1586	0.021683	18.5633	1586	0.012758	18.566	1586	0.672938	18.5273	1586	0.112316	18.5221	1586	0.130398	18.5235
1587	0.002007	18.5699	1587	0.021691	18.57	1587	0.012726	18.5726	1587	0.67065	18.534	1587	0.111734	18.5287	1587	0.129943	18.5301
1588	0.002001	18.5765	1588	0.021686	18.5766	1588	0.012686	18.5793	1588	0.667919	18.5406	1588	0.111164	18.5353	1588	0.129507	18.5368
1589	0.00199	18.5832	1589	0.021687	18.5832	1589	0.012649	18.5859	1589	0.664243	18.5472	1589	0.110559	18.542	1589	0.12902	18.5434
1590	0.001982	18.59	1590	0.02169	18.5899	1590	0.012626	18.5925	1590	0.661003	18.5539	1590	0.110025	18.5486	1590	0.128387	18.55
1591	0.001977	18.5967	1591	0.0217	18.5965	1591	0.012604	18.5992	1591	0.658649	18.5605	1591	0.109454	18.5552	1591	0.127759	18.5567
1592	0.001972	18.6033	1592	0.021709	18.6034	1592	0.012581	18.6058	1592	0.657164	18.5673	1592	0.108914	18.5619	1592	0.127213	18.5633
1593	0.001964	18.6099	1593	0.021719	18.61	1593	0.01257	18.6127	1593	0.656988	18.574	1593	0.108294	18.5685	1593	0.126588	18.57
1594	0.001958	18.6166	1594	0.021728	18.6167	1594	0.012542	18.6193	1594	0.657316	18.5807	1594	0.107766	18.5754	1594	0.125757	18.5768
1595	0.001956	18.6232	1595	0.021732	18.6233	1595	0.012517	18.6259	1595	0.658064	18.5873	1595	0.10718	18.582	1595	0.124816	18.5834
1596	0.001954	18.6298	1596	0.021744	18.6299	1596	0.012494	18.6326	1596	0.658584	18.5939	1596	0.106648	18.5887	1596	0.124039	18.5901
1597	0.001944	18.6365	1597	0.021757	18.6366	1597	0.012479	18.6392	1597	0.658379	18.6006	1597	0.106141	18.5953	1597	0.123323	18.5967
1598	0.001936	18.6434	1598	0.021779	18.6432	1598	0.01247	18.6459	1598	0.65873	18.6072	1598	0.105686	18.6019	1598	0.122727	18.6034
1599	0.001937	18.65	1599	0.021794	18.6499	1599	0.012465	18.6525	1599	0.65994	18.6138	1599	0.105183	18.6086	1599	0.122124	18.61
1600	0.001925	18.6566	1600	0.0218	18.6567	1600	0.012462	18.6591	1600	0.660774	18.6206	1600	0.104727	18.6152	1600	0.121587	18.6166
1601	0.001915	18.6633	1601	0.021806	18.6633	1601	0.012457	18.666	1601	0.660492	18.6273	1601	0.104241	18.6219	1601	0.121031	18.6233
1602	0.001907	18.6699	1602	0.021807	18.67	1602	0.012452	18.6727	1602	0.660024	18.634	1602	0.103847	18.6287	1602	0.120586	18.6302
1603	0.001905	18.6765	1603	0.02181	18.6766	1603	0.012443	18.6793	1603	0.65873	18.6406	1603	0.103438	18.6354	1603	0.120116	18.6368
1604	0.001898	18.6832	1604	0.021815	18.6833	1604	0.012434	18.6859	1604	0.65738	18.6473	1604	0.103089	18.642	1604	0.119757	18.6434
1605	0.001891	18.6898	1605	0.021831	18.6899	1605	0.012413	18.6926	1605	0.65682	18.6539	1605	0.102718	18.6486	1605	0.119293	18.6501
1606	0.001881	18.6967	1606	0.021832	18.6965	1606	0.012393	18.6992	1606	0.656512	18.6605	1606	0.102328	18.6553	1606	0.118774	18.6567
1607	0.001879	18.7033	1607	0.021828	18.7032	1607	0.01239	18.7058	1607	0.65635	18.6672	1607	0.101796	18.6619	1607	0.118077	18.6633
1608	0.001876	18.7099	1608	0.021833	18.71	1608	0.012398	18.7125	1608	0.656012	18.6739	1608	0.10127	18.6685	1608	0.117421	18.67
1609	0.001867	18.7166	1609	0.021833	18.7167	1609	0.012394	18.7193	1609	0.655714	18.6807	1609	0.100823	18.6752	1609	0.116787	18.6766
1610	0.001869	18.7232	1610	0.021831	18.7233	1610	0.01238	18.726	1610	0.655358	18.6873	1610	0.100381	18.682	1610	0.116187	18.6835
1611	0.001869	18.7299	1611	0.021829	18.73	1611	0.012363	18.7326	1611	0.655327	18.694	1611	0.099922	18.6887	1611	0.115546	18.6901
1612	0.001866	18.7365	1612	0.021842	18.7366	1612	0.012344	18.7392	1612	0.655424	18.7006	1612	0.099415	18.6953	1612	0.114919	18.6968
1613	0.001855	18.7431	1613	0.02186	18.7432	1613	0.012332	18.7459	1613	0.65532	18.7072	1613	0.098975	18.702	1613	0.114275	18.7034
1614	0.001854	18.75	1614	0.021871	18.7499	1614	0.012331	18.7525	1614	0.654316	18.7139	1614	0.098508	18.7086	1614	0.113631	18.71
1615	0.001855	18.7567	1615	0.021873	18.7565	1615	0.012327	18.7592	1615	0.652607	18.7205	1615	0.098087	18.7152	1615	0.113095	18.7167
1616	0.001854	18.7633	1616	0.021889	18.7634	1616	0.012317	18.7658	1616	0.650303	18.7273	1616	0.097614	18.7219	1616	0.112513	18.7233
1617	0.001846	18.7699	1617	0.021906	18.77	1617	0.012304	18.7727	1617	0.64829	18.734	1617	0.097243	18.7285	1617	0.112061	18.73
1618	0.001837	18.7766	1618	0.021917	18.7767	1618	0.012284	18.7793	1618	0.646598	18.7406	1618	0.096836	18.7354	1618	0.111608	18.7368
1619	0.001831	18.7832	1619	0.021922	18.7833	1619	0.012255	18.7859	1619	0.644996	18.7473	1619	0.09644	18.742	1619	0.11111	18.7435
1620	0.001827	18.7898	1620	0.021918	18.7899	1620	0.012239	18.7926	1620	0.644574	18.7539	1620	0.096047	18.7487	1620	0.110552	18.7501
1621	0.001823	18.7965	1621	0.021919	18.7965	1621	0.01223	18.7992	1621	0.644201	18.7606	1621	0.095716	18.7553	1621	0.110012	18.7567
1622	0.001822	18.8033	1622	0.021923	18.8032	1622	0.012219	18.8059	1622	0.643229	18.7672	1622	0.095333	18.7619	1622	0.109393	18.7634
1623	0.001824	18.81	1623	0.02192	18.8098	1623	0.012199	18.8125	1623	0.642569	18.7738	1623	0.094969	18.7686	1623	0.108929	18.77
1624	0.001822	18.8166	1624	0.021919	18.8167	1624	0.012174	18.8191	1624	0.642976	18.7806	1624	0.094538	18.7752	1624	0.108573	18.7766
1625	0.001819	18.8233	1625	0.021922	18.8233	1625	0.012157	18.826	1625	0.64347	18.7873	1625	0.094153	18.7819	1625	0.108249	18.7833
1626	0.001813	18.8299	1626	0.021914	18.83	1626	0.012131	18.8326	1626	0.644162	18.794	1626	0.093797	18.7887	1626	0.107768	18.7901
1627	0.00181	18.8365	1627	0.021913	18.8366	1627	0.012115	18.8393	1627	0.644787	18.8006	1627	0.093472	18.7953	1627	0.107281	18.7968
1628	0.001815	18.8432	1628	0.021914	18.8433	1628	0.012098	18.8459	1628	0.644446	18.8072	1628	0.093096	18.802	1628	0.106762	18.8034
1629	0.00182	18.8498	1629	0.021923	18.8499	1629	0.012088	18.8525	1629	0.643602	18.8139	1629	0.09272	18.8086	1629	0.106322	18.8101
1630	0.001824	18.8567	1630	0.021938	18.8565	1630	0.012079	18.8592	1630	0.642085	18.8205	1630	0.092275	18.8152	1630	0.106061	18.8167
1631	0.001827	18.8633	1631	0.021951	18.8632	1631	0.012062	18.8658	1631	0.64087	18.8272	1631	0.091842	18.8219	1631	0.105878	18.8233
1632	0.001832	18.87	1632	0.021949	18.87	1632	0.012045	18.8724	1632	0.639667	18.8339	1632	0.091507	18.8285	1632	0.105702	18.83
1633	0.001832	18.8766	1633	0.021941	18.8767	1633	0.012028	18.8793	1633	0.637838	18.8407	1633	0.091178	18.8352	1633	0.105484	18.8366
1634	0.001827	18.8832	1634	0.021947	18.8833	1634	0.012008	18.886	1634	0.636011	18.8473	1634	0.090832	18.842	1634	0.104955	18.8435
1635	0.001827	18.8899	1635	0.021956	18.8899	1635	0.011985	18.8926	1635	0.634417	18.8539	1635	0.090434	18.8487	1635	0.104477	18.8501
1636	0.001828	18.8965	1636	0.021964	18.8966	1636	0.011969	18.8992	1636	0.633071	18.8606	1636	0.090006	18.8553	1636	0.104073	18.8568
1637	0.001835	18.9031	1637	0.021961	18.9032	1637	0.011939	18.9059	1637	0.632195	18.8672	1637	0.089531	18.862	1637	0.103651	18.8634
1638	0.001828	18.91	1638	0.021959	18.9099	1638	0.01191	18.9125	1638	0.632151	18.8739	1638	0.089165	18.8686	1638	0.103195	18.87
1639	0.001826	18.9166	1639	0.02196	18.9165	1639	0.011893	18.9191	1639	0.632685	18.8805	1639	0.088793	18.8752	1639	0.10271	18.8767
1640	0.001823	18.9233	1640	0.021966	18.9234	1640	0.011866	18.9258	1640	0.632762	18.8872	1640	0.088454	18.8819	1640	0.10212	18.8833
1641	0.001817	18.9299	1641	0.021954	18.93	1641	0.011841	18.9326	1641	0.631203	18.894	1641	0.088071	18.8885	1641	0.101537	18.8899
1642	0.001808	18.9365	1642	0.021948	18.9367	1642	0.01182	18.9393	1642	0.630172	18.9006	1642	0.087694	18.8954	1642	0.100992	18.8968
1643	0.001805	18.9432	1643	0.021954	18.9433	1643	0.011799	18.9459	1643	0.630535	18.9073	1643	0.087315	18.902	1643	0.10041	18.9034
1644	0.001809	18.9498	1644	0.021945	18.9499	1644	0.011784	18.9525	1644	0.630837	18.9139	1644	0.087028	18.9086	1644	0.100034	18.9101
1645	0.00181	18.9565	1645	0.021936	18.9566	1645	0.011771	18.9592	1645	0.630758	18.9205	1645	0.086708	18.9153	1645	0.099631	18.9167
1646	0.001807	18.9633	1646	0.021929	18.9632	1646	0.011762	18.9658	1646	0.630562	18.9272	1646	0.086442	18.9219	1646	0.099318	18.9233
1647	0.001806	18.97	1647	0.021925	18.9698	1647	0.011761	18.9725	1647	0.629805	18.9338	1647	0.086137	18.9286	1647	0.098954	18.93
1648	0.001807	18.9766	1648	0.02191	18.9767	1648	0.01176	18.9791	1648	0.628998	18.9405	1648	0.085837	18.9352	1648	0.098662	18.9366
1649	0.0018	18.9832	1649	0.021894	18.9833	1649	0.01175	18.986	1649	0.628498	18.9473	1649	0.085509	18.9418	1649	0.098403	18.9432
1650	0.001793	18.9899	1650	0.021876	18.99	1650	0.011736	18.9926	1650	0.628186	18.954	1650	0.085218	18.9487	1650	0.098112	18.9501
1651	0.001792	18.9965	1651	0.021869	18.9966	1651	0.011719	18.9992	1651	0.628892	18.9606	1651	0.084933	18.9553	1651	0.09769	18.9567
1652	0.001794	19.0032	1652	0.021869	19.0032	1652	0.011705	19.0059	1652	0.629476	18.9672	1652	0.084645	18.962	1652	0.097312	18.9634
1653	0.001794	19.0098	1653	0.021866	19.0099	1653	0.011697	19.0125	1653	0.629639	18.9739	1653	0.084365	18.9686	1653	0.096876	18.97
1654	0.00179	19.0166	1654	0.021857	19.0165	1654	0.011692	19.0192	1654	0.629953	18.9805	1654	0.084106	18.9752	1654	0.09648	18.9767
1655	0.001786	19.0233	1655	0.021846	19.0231	1655	0.011676	19.0258	1655	0.6303	18.9871	1655	0.083903	18.9819	1655	0.096156	18.9833
1656	0.00179	19.0299	1656	0.021836	19.03	1656	0.01165	19.0324	1656	0.630579	18.9939	1656	0.083703	18.9885	1656	0.095875	18.9899
1657	0.001792	19.0366	1657	0.021825	19.0367	1657	0.011615	19.0393	1657	0.630538	19.0006	1657	0.083566	18.9952	1657	0.095745	18.9966
1658	0.001792	19.0432	1658	0.021817	19.0433	1658	0.011583	19.0459	1658	0.629931	19.0073	1658	0.08342	19.002	1658	0.095613	19.0034
1659	0.001793	19.0498	1659	0.021811	19.0499	1659	0.011571	19.0526	1659	0.629179	19.0139	1659	0.083235	19.0086	1659	0.095411	19.0101
1660	0.001796	19.0565	1660	0.021804	19.0566	1660	0.011568	19.0592	1660	0.628812	19.0206	1660	0.083002	19.0153	1660	0.095215	19.0167
1661	0.001799	19.0631	1661	0.021799	19.0632	1661	0.011565	19.0659	1661	0.628172	19.0272	1661	0.082776	19.0219	1661	0.095013	19.0234
1662	0.001797	19.07	1662	0.021781	19.0698	1662	0.011542	19.0725	1662	0.626098	19.0338	1662	0.082519	19.0286	1662	0.094764	19.03
1663	0.00179	19.0766	1663	0.021767	19.0765	1663	0.011529	19.0791	1663	0.623795	19.0405	1663	0.082252	19.0352	1663	0.094702	19.0366
1664	0.001791	19.0833	1664	0.021764	19.0833	1664	0.011516	19.0858	1664	0.62138	19.0472	1664	0.081977	19.0418	1664	0.094697	19.0433
1665	0.00179	19.0899	1665	0.021755	19.09	1665	0.011514	19.0926	1665	0.61921	19.054	1665	0.081714	19.0485	1665	0.094524	19.0499
1666	0.001783	19.0965	1666	0.021739	19.0966	1666	0.011521	19.0993	1666	0.618591	19.0606	1666	0.081426	19.0554	1666	0.094226	19.0568
1667	0.001776	19.1032	1667	0.021725	19.1032	1667	0.011532	19.1059	1667	0.618445	19.0673	1667	0.08113	19.062	1667	0.093854	19.0634
1668	0.001774	19.1098	1668	0.021719	19.1099	1668	0.011536	19.1125	1668	0.61808	19.0739	1668	0.080761	19.0686	1668	0.093477	19.07
1669	0.001773	19.1165	1669	0.021705	19.1165	1669	0.011532	19.1192	1669	0.617447	19.0805	1669	0.080456	19.0753	1669	0.093107	19.0767
1670	0.001766	19.1233	1670	0.021684	19.1232	1670	0.011515	19.1258	1670	0.616424	19.0872	1670	0.080159	19.0819	1670	0.092671	19.0833
1671	0.001762	19.13	1671	0.021668	19.1298	1671	0.011503	19.1324	1671	0.615923	19.0938	1671	0.079898	19.0885	1671	0.092391	19.09
1672	0.001758	19.1366	1672	0.021653	19.1367	1672	0.011518	19.1391	1672	0.616345	19.1005	1672	0.079709	19.0952	1672	0.092263	19.0966
1673	0.001758	19.1432	1673	0.021627	19.1433	1673	0.011517	19.1459	1673	0.61655	19.1073	1673	0.079525	19.1018	1673	0.092033	19.1032
1674	0.001751	19.1499	1674	0.021599	19.1499	1674	0.011517	19.1526	1674	0.616919	19.1139	1674	0.079211	19.1087	1674	0.091499	19.1101
1675	0.001748	19.1565	1675	0.021576	19.1566	1675	0.01152	19.1592	1675	0.61726	19.1206	1675	0.078913	19.1153	1675	0.091111	19.1167
1676	0.001748	19.1631	1676	0.021556	19.1632	1676	0.011513	19.1659	1676	0.616485	19.1272	1676	0.078595	19.1219	1676	0.09102	19.1234
1677	0.001752	19.1698	1677	0.021538	19.1699	1677	0.011505	19.1725	1677	0.615963	19.1338	1677	0.0783	19.1286	1677	0.090932	19.13
1678	0.001746	19.1766	1678	0.021514	19.1765	1678	0.011498	19.1791	1678	0.616079	19.1405	1678	0.07817	19.1352	1678	0.090681	19.1366
1679	0.001746	19.1833	1679	0.021489	19.1831	1679	0.011486	19.1858	1679	0.616031	19.1471	1679	0.078065	19.1418	1679	0.090456	19.1433
1680	0.001749	19.1899	1680	0.021463	19.19	1680	0.011487	19.1924	1680	0.615845	19.1538	1680	0.077968	19.1485	1680	0.090371	19.1499
1681	0.001742	19.1965	1681	0.02144	19.1966	1681	0.011486	19.1993	1681	0.615665	19.1606	1681	0.077858	19.1551	1681	0.090276	19.1566
1682	0.00174	19.2032	1682	0.021412	19.2033	1682	0.011477	19.2059	1682	0.616045	19.1673	1682	0.077682	19.162	1682	0.090106	19.1634
1683	0.00174	19.2098	1683	0.021388	19.2099	1683	0.011478	19.2126	1683	0.61639	19.1739	1683	0.07749	19.1686	1683	0.089961	19.1701
1684	0.001739	19.2165	1684	0.021367	19.2165	1684	0.011473	19.2192	1684	0.616421	19.1805	1684	0.077406	19.1753	1684	0.089978	19.1767
1685	0.001739	19.2231	1685	0.021345	19.2232	1685	0.011465	19.2259	1685	0.615666	19.1872	1685	0.077305	19.1819	1685	0.089939	19.1833
1686	0.001738	19.23	1686	0.021325	19.2298	1686	0.011469	19.2325	1686	0.614561	19.1938	1686	0.077245	19.1885	1686	0.089724	19.19
1687	0.001735	19.2366	1687	0.021302	19.2365	1687	0.011478	19.2391	1687	0.613206	19.2005	1687	0.077177	19.1952	1687	0.089501	19.1966
1688	0.001737	19.2432	1688	0.021277	19.2433	1688	0.011484	19.2458	1688	0.612035	19.2071	1688	0.076999	19.2018	1688	0.089386	19.2033
1689	0.001732	19.2499	1689	0.021257	19.25	1689	0.011489	19.2526	1689	0.61028	19.2139	1689	0.076761	19.2084	1689	0.089228	19.2099
1690	0.001727	19.2565	1690	0.021247	19.2566	1690	0.011502	19.2593	1690	0.608473	19.2206	1690	0.076544	19.2153	1690	0.088944	19.2168
1691	0.001731	19.2631	1691	0.021231	19.2632	1691	0.011513	19.2659	1691	0.606411	19.2272	1691	0.076315	19.2219	1691	0.088543	19.2234
1692	0.001725	19.2698	1692	0.021214	19.2699	1692	0.01151	19.2725	1692	0.604405	19.2339	1692	0.076115	19.2286	1692	0.088147	19.23
1693	0.001722	19.2764	1693	0.021198	19.2765	1693	0.01149	19.2792	1693	0.603755	19.2405	1693	0.075924	19.2352	1693	0.087789	19.2367
1694	0.001722	19.2833	1694	0.021172	19.2831	1694	0.011492	19.2858	1694	0.603492	19.2471	1694	0.075758	19.2419	1694	0.08751	19.2433
1695	0.00172	19.2899	1695	0.021141	19.2898	1695	0.01148	19.2924	1695	0.603939	19.2538	1695	0.075603	19.2485	1695	0.087278	19.2499
1696	0.001714	19.2966	1696	0.021117	19.2966	1696	0.011466	19.2991	1696	0.604409	19.2605	1696	0.075453	19.2551	1696	0.087047	19.2566
1697	0.001709	19.3032	1697	0.021099	19.3033	1697	0.011456	19.3059	1697	0.604755	19.2673	1697	0.075238	19.2618	1697	0.086811	19.2632
1698	0.00171	19.3098	1698	0.021077	19.3099	1698	0.011445	19.3126	1698	0.605038	19.2739	1698	0.075053	19.2686	1698	0.086608	19.2701
1699	0.001706	19.3165	1699	0.021053	19.3166	1699	0.01144	19.3192	1699	0.605899	19.2806	1699	0.074851	19.2753	1699	0.086347	19.2767
1700	0.0017	19.3231	1700	0.021027	19.3232	1700	0.01143	19.3259	1700	0.606632	19.2872	1700	0.074661	19.2819	1700	0.086157	19.2833
1701	0.001692	19.3298	1701	0.021005	19.3298	1701	0.011419	19.3325	1701	0.607495	19.2938	1701	0.074383	19.2886	1701	0.086104	19.29
1702	0.001693	19.3366	1702	0.020976	19.3365	1702	0.011426	19.3391	1702	0.608282	19.3005	1702	0.074098	19.2952	1702	0.086027	19.2966
1703	0.001692	19.3433	1703	0.020947	19.3431	1703	0.011436	19.3458	1703	0.607349	19.3071	1703	0.073783	19.3018	1703	0.08575	19.3032
1704	0.001689	19.3499	1704	0.020921	19.35	1704	0.011419	19.3524	1704	0.605271	19.3138	1704	0.073465	19.3085	1704	0.085474	19.3099
1705	0.001685	19.3565	1705	0.020907	19.3566	1705	0.011432	19.3593	1705	0.603323	19.3206	1705	0.073166	19.3151	1705	0.085168	19.3165
1706	0.001681	19.3632	1706	0.020884	19.3633	1706	0.011436	19.3659	1706	0.601661	19.3272	1706	0.072877	19.322	1706	0.084858	19.3234
1707	0.001679	19.3698	1707	0.020851	19.3699	1707	0.011429	19.3725	1707	0.600409	19.3339	1707	0.072645	19.3286	1707	0.084544	19.33
1708	0.001675	19.3764	1708	0.020824	19.3765	1708	0.011435	19.3792	1708	0.599963	19.3405	1708	0.072406	19.3352	1708	0.084251	19.3367
1709	0.001674	19.3831	1709	0.020808	19.3832	1709	0.011431	19.3858	1709	0.599608	19.3472	1709	0.07224	19.3419	1709	0.08409	19.3433
1710	0.001678	19.3899	1710	0.020783	19.3898	1710	0.011417	19.3925	1710	0.598965	19.3538	1710	0.072081	19.3485	1710	0.083927	19.3499
1711	0.001683	19.3966	1711	0.020747	19.3964	1711	0.011399	19.3991	1711	0.598354	19.3605	1711	0.072035	19.3552	1711	0.083729	19.3566
1712	0.001683	19.4032	1712	0.020718	19.4033	1712	0.011369	19.4057	1712	0.59744	19.3671	1712	0.072001	19.3618	1712	0.083532	19.3632
1713	0.001679	19.4099	1713	0.020686	19.4099	1713	0.011349	19.4126	1713	0.597218	19.374	1713	0.071983	19.3684	1713	0.08348	19.3699
1714	0.001679	19.4165	1714	0.020654	19.4166	1714	0.011339	19.4193	1714	0.599274	19.3806	1714	0.071948	19.3753	1714	0.083427	19.3767
1715	0.001678	19.4231	1715	0.020622	19.4232	1715	0.011311	19.4259	1715	0.601141	19.3872	1715	0.071892	19.3819	1715	0.083373	19.3834
1716	0.00168	19.4298	1716	0.020582	19.4299	1716	0.011291	19.4325	1716	0.602076	19.3939	1716	0.071816	19.3886	1716	0.083281	19.39
1717	0.001674	19.4364	1717	0.020544	19.4365	1717	0.011268	19.4392	1717	0.602722	19.4005	1717	0.071731	19.3952	1717	0.083216	19.3966
1718	0.001668	19.4433	1718	0.020509	19.4431	1718	0.011235	19.4458	1718	0.602451	19.4071	1718	0.071586	19.4019	1718	0.083176	19.4033
1719	0.001665	19.4499	1719	0.020459	19.4498	1719	0.011201	19.4524	1719	0.602264	19.4138	1719	0.071404	19.4085	1719	0.083112	19.4099
1720	0.001658	19.4566	1720	0.020413	19.4566	1720	0.011179	19.4591	1720	0.602876	19.4204	1720	0.071134	19.4151	1720	0.083019	19.4166
1721	0.001649	19.4632	1721	0.020377	19.4633	1721	0.011161	19.4659	1721	0.603665	19.4273	1721	0.070858	19.4218	1721	0.082907	19.4232
1722	0.00164	19.4698	1722	0.020343	19.4699	1722	0.011144	19.4726	1722	0.603233	19.4339	1722	0.070549	19.4286	1722	0.08275	19.4301
1723	0.001634	19.4765	1723	0.020299	19.4766	1723	0.011123	19.4792	1723	0.601798	19.4406	1723	0.070259	19.4353	1723	0.082575	19.4367
1724	0.001629	19.4831	1724	0.020256	19.4832	1724	0.011103	19.4858	1724	0.598771	19.4472	1724	0.069934	19.4419	1724	0.082281	19.4433
1725	0.001622	19.4897	1725	0.020207	19.4898	1725	0.011087	19.4925	1725	0.595613	19.4538	1725	0.069621	19.4486	1725	0.082028	19.45
1726	0.001616	19.4966	1726	0.020158	19.4965	1726	0.01107	19.4991	1726	0.593022	19.4605	1726	0.069349	19.4552	1726	0.081734	19.4566
1727	0.001616	19.5032	1727	0.020115	19.5031	1727	0.011043	19.5057	1727	0.590357	19.4671	1727	0.069107	19.4618	1727	0.081424	19.4632
1728	0.001612	19.5099	1728	0.020071	19.51	1728	0.011017	19.5124	1728	0.587937	19.4738	1728	0.068941	19.4685	1728	0.080978	19.4699
1729	0.001608	19.5165	1729	0.020025	19.5166	1729	0.010993	19.5192	1729	0.585699	19.4806	1729	0.068799	19.4751	1729	0.080538	19.4765
1730	0.001609	19.5232	1730	0.019973	19.5232	1730	0.010955	19.5259	1730	0.583327	19.4872	1730	0.068751	19.482	1730	0.080151	19.4834
1731	0.001614	19.5298	1731	0.019924	19.5299	1731	0.010918	19.5325	1731	0.581517	19.4939	1731	0.06871	19.4886	1731	0.079785	19.49
1732	0.001614	19.5364	1732	0.019872	19.5365	1732	0.010885	19.5392	1732	0.581455	19.5005	1732	0.068666	19.4952	1732	0.079583	19.4967
1733	0.001613	19.5431	1733	0.019825	19.5431	1733	0.010852	19.5458	1733	0.583242	19.5071	1733	0.068611	19.5019	1733	0.079446	19.5033
1734	0.00161	19.5499	1734	0.019777	19.5498	1734	0.010807	19.5524	1734	0.585172	19.5138	1734	0.068624	19.5085	1734	0.079356	19.5099
1735	0.001608	19.5566	1735	0.019729	19.5564	1735	0.010767	19.5591	1735	0.586974	19.5204	1735	0.068642	19.5151	1735	0.079224	19.5166
1736	0.001607	19.5632	1736	0.019687	19.5633	1736	0.010737	19.5657	1736	0.588819	19.5271	1736	0.068605	19.5218	1736	0.079111	19.5232
1737	0.001606	19.5698	1737	0.019637	19.5699	1737	0.010708	19.5726	1737	0.590387	19.5339	1737	0.06854	19.5284	1737	0.078917	19.5298
1738	0.001605	19.5765	1738	0.019577	19.5766	1738	0.010677	19.5792	1738	0.591816	19.5406	1738	0.068403	19.5353	1738	0.078879	19.5367
1739	0.001605	19.5831	1739	0.019518	19.5832	1739	0.010646	19.5859	1739	0.592567	19.5472	1739	0.06819	19.5419	1739	0.078907	19.5434
1740	0.001602	19.5898	1740	0.019467	19.5898	1740	0.010628	19.5925	1740	0.592876	19.5538	1740	0.067996	19.5486	1740	0.07887	19.55
1741	0.001591	19.5964	1741	0.01941	19.5965	1741	0.010618	19.5991	1741	0.592741	19.5605	1741	0.067856	19.5552	1741	0.078723	19.5566
1742	0.001586	19.6033	1742	0.019349	19.6031	1742	0.010597	19.6058	1742	0.592602	19.5671	1742	0.067743	19.5618	1742	0.078459	19.5633
1743	0.001583	19.6099	1743	0.019294	19.6097	1743	0.010564	19.6124	1743	0.591673	19.5738	1743	0.067624	19.5685	1743	0.078172	19.5699
1744	0.00158	19.6166	1744	0.019238	19.6166	1744	0.010544	19.619	1744	0.590844	19.5804	1744	0.067482	19.5751	1744	0.077958	19.5766
1745	0.001574	19.6232	1745	0.019173	19.6232	1745	0.0105	19.6259	1745	0.590374	19.5873	1745	0.0673	19.5817	1745	0.077625	19.5832
1746	0.001565	19.6298	1746	0.019109	19.6299	1746	0.010451	19.6325	1746	0.590016	19.5939	1746	0.067146	19.5886	1746	0.077356	19.5901
1747	0.001557	19.6365	1747	0.019045	19.6365	1747	0.010426	19.6392	1747	0.589785	19.6005	1747	0.066995	19.5953	1747	0.07726	19.5967
1748	0.001555	19.6431	1748	0.01899	19.6432	1748	0.010398	19.6458	1748	0.589284	19.6072	1748	0.066906	19.6019	1748	0.077142	19.6033
1749	0.001546	19.6497	1749	0.018939	19.6498	1749	0.010373	19.6525	1749	0.589436	19.6138	1749	0.066864	19.6085	1749	0.076994	19.61
1750	0.001543	19.6566	1750	0.018886	19.6564	1750	0.010348	19.6591	1750	0.590087	19.6204	1750	0.066789	19.6152	1750	0.076891	19.6166
1751	0.001545	19.6632	1751	0.018827	19.6631	1751	0.010314	19.6657	1751	0.59042	19.6271	1751	0.066577	19.6218	1751	0.076869	19.6232
1752	0.001542	19.6699	1752	0.018765	19.67	1752	0.010297	19.6724	1752	0.590356	19.6337	1752	0.066371	19.6284	1752	0.076837	19.6299
1753	0.001541	19.6765	1753	0.018709	19.6766	1753	0.010287	19.6792	1753	0.590007	19.6406	1753	0.066186	19.6351	1753	0.076757	19.6365
1754	0.001537	19.6831	1754	0.018657	19.6832	1754	0.010268	19.6859	1754	0.588729	19.6472	1754	0.066011	19.6419	1754	0.076663	19.6434
1755	0.001531	19.6898	1755	0.018604	19.6899	1755	0.010282	19.6925	1755	0.58738	19.6539	1755	0.065814	19.6486	1755	0.076715	19.65
1756	0.00153	19.6964	1756	0.018556	19.6965	1756	0.010292	19.6991	1756	0.586389	19.6605	1756	0.065614	19.6552	1756	0.076758	19.6567
1757	0.001529	19.7031	1757	0.018506	19.7032	1757	0.01029	19.7058	1757	0.585624	19.6671	1757	0.065418	19.6619	1757	0.076578	19.6633
1758	0.001527	19.7099	1758	0.01845	19.7098	1758	0.010301	19.7124	1758	0.584703	19.6738	1758	0.065218	19.6685	1758	0.07626	19.6699
1759	0.001534	19.7166	1759	0.018385	19.7164	1759	0.010291	19.7191	1759	0.583654	19.6804	1759	0.06501	19.6751	1759	0.075929	19.6766
1760	0.001536	19.7232	1760	0.018322	19.7233	1760	0.010286	19.7257	1760	0.581927	19.6871	1760	0.064789	19.6818	1760	0.07561	19.6832
1761	0.001537	19.7298	1761	0.01827	19.7299	1761	0.010302	19.7326	1761	0.580242	19.6939	1761	0.064699	19.6884	1761	0.075274	19.6898
1762	0.001542	19.7365	1762	0.018223	19.7366	1762	0.01031	19.7392	1762	0.579014	19.7005	1762	0.064641	19.6953	1762	0.074892	19.6967
1763	0.00154	19.7431	1763	0.018167	19.7432	1763	0.010316	19.7459	1763	0.577961	19.7072	1763	0.06455	19.7019	1763	0.074537	19.7034
1764	0.00154	19.7497	1764	0.018105	19.7498	1764	0.010326	19.7525	1764	0.577034	19.7138	1764	0.064426	19.7085	1764	0.074194	19.71
1765	0.001543	19.7564	1765	0.018058	19.7565	1765	0.010317	19.7591	1765	0.575856	19.7205	1765	0.064338	19.7152	1765	0.073849	19.7166
1766	0.001541	19.7632	1766	0.017998	19.7631	1766	0.010294	19.7658	1766	0.57454	19.7271	1766	0.064222	19.7218	1766	0.073448	19.7233
1767	0.001542	19.7699	1767	0.017936	19.7697	1767	0.010275	19.7724	1767	0.573389	19.7337	1767	0.064138	19.7285	1767	0.073182	19.7299
1768	0.001542	19.7765	1768	0.01788	19.7766	1768	0.010261	19.779	1768	0.572555	19.7404	1768	0.064091	19.7351	1768	0.073061	19.7365
1769	0.001538	19.7831	1769	0.017834	19.7832	1769	0.010272	19.7859	1769	0.571594	19.7472	1769	0.06407	19.7417	1769	0.072936	19.7432
1770	0.001538	19.7898	1770	0.017779	19.7899	1770	0.010276	19.7925	1770	0.571019	19.7539	1770	0.063993	19.7486	1770	0.072875	19.75
1771	0.001537	19.7965	1771	0.017717	19.7965	1771	0.010264	19.7992	1771	0.570456	19.7605	1771	0.063866	19.7552	1771	0.072848	19.7567
1772	0.001534	19.8031	1772	0.017653	19.8032	1772	0.010255	19.8058	1772	0.569807	19.7672	1772	0.0637	19.7619	1772	0.072735	19.7633
1773	0.001535	19.8097	1773	0.017605	19.8098	1773	0.010246	19.8124	1773	0.56929	19.7738	1773	0.063566	19.7685	1773	0.072623	19.7699
1774	0.001528	19.8166	1774	0.017547	19.8164	1774	0.010242	19.8191	1774	0.56932	19.7804	1774	0.063437	19.7752	1774	0.072484	19.7766
1775	0.001529	19.8232	1775	0.017484	19.8231	1775	0.010241	19.8257	1775	0.569168	19.7871	1775	0.063327	19.7818	1775	0.072361	19.7832
1776	0.001536	19.8299	1776	0.017439	19.8299	1776	0.01025	19.8324	1776	0.568647	19.7937	1776	0.063205	19.7884	1776	0.072367	19.7899
1777	0.001541	19.8365	1777	0.017389	19.8366	1777	0.010263	19.8392	1777	0.567787	19.8006	1777	0.063059	19.7951	1777	0.072385	19.7965
1778	0.001545	19.8431	1778	0.017339	19.8432	1778	0.010268	19.8459	1778	0.567162	19.8072	1778	0.062889	19.8019	1778	0.07237	19.8034
1779	0.001547	19.8498	1779	0.017283	19.8498	1779	0.010265	19.8525	1779	0.567363	19.8138	1779	0.062733	19.8086	1779	0.072341	19.81
1780	0.001544	19.8564	1780	0.017228	19.8565	1780	0.010256	19.8591	1780	0.567582	19.8205	1780	0.062595	19.8152	1780	0.07221	19.8166
1781	0.001546	19.8631	1781	0.017174	19.8631	1781	0.010247	19.8658	1781	0.567679	19.8271	1781	0.062421	19.8219	1781	0.072073	19.8233
1782	0.001547	19.8699	1782	0.017124	19.8697	1782	0.010243	19.8724	1782	0.567678	19.8337	1782	0.062295	19.8285	1782	0.07206	19.8299
1783	0.001549	19.8765	1783	0.017069	19.8764	1783	0.010245	19.879	1783	0.567467	19.8404	1783	0.062204	19.8351	1783	0.072032	19.8365
1784	0.001555	19.8832	1784	0.017021	19.8833	1784	0.010245	19.8857	1784	0.567406	19.847	1784	0.062104	19.8418	1784	0.071959	19.8432
1785	0.001557	19.8898	1785	0.016967	19.8899	1785	0.010246	19.8925	1785	0.567842	19.8539	1785	0.061972	19.8484	1785	0.071782	19.8498
1786	0.001556	19.8965	1786	0.016906	19.8965	1786	0.010257	19.8992	1786	0.568357	19.8605	1786	0.061877	19.8553	1786	0.071568	19.8567
1787	0.001558	19.9031	1787	0.016849	19.9032	1787	0.010265	19.9058	1787	0.569262	19.8671	1787	0.061778	19.8619	1787	0.071425	19.8633
1788	0.00156	19.9097	1788	0.016792	19.9098	1788	0.010264	19.9125	1788	0.570199	19.8738	1788	0.061674	19.8685	1788	0.071284	19.87
1789	0.001563	19.9164	1789	0.016734	19.9165	1789	0.010264	19.9191	1789	0.569868	19.8804	1789	0.061572	19.8752	1789	0.071108	19.8766
1790	0.00157	19.9232	1790	0.016682	19.9231	1790	0.010276	19.9258	1790	0.569128	19.8871	1790	0.061508	19.8818	1790	0.07095	19.8832
1791	0.001577	19.9299	1791	0.016634	19.9297	1791	0.010285	19.9324	1791	0.568586	19.8937	1791	0.061425	19.8884	1791	0.070705	19.8899
1792	0.001583	19.9365	1792	0.016581	19.9366	1792	0.010289	19.939	1792	0.568107	19.9003	1792	0.061301	19.8951	1792	0.070474	19.8965
1793	0.001588	19.9431	1793	0.01652	19.9432	1793	0.010286	19.9459	1793	0.567789	19.9072	1793	0.061035	19.9017	1793	0.070415	19.9032
1794	0.001597	19.9498	1794	0.016455	19.9499	1794	0.010282	19.9525	1794	0.567674	19.9139	1794	0.060804	19.9086	1794	0.070446	19.91
1795	0.001607	19.9564	1795	0.016392	19.9565	1795	0.010269	19.9592	1795	0.56686	19.9205	1795	0.060618	19.9152	1795	0.070555	19.9167
1796	0.001614	19.9631	1796	0.016336	19.9631	1796	0.010253	19.9658	1796	0.564724	19.9271	1796	0.060445	19.9219	1796	0.070633	19.9233
1797	0.001618	19.9697	1797	0.016282	19.9698	1797	0.010242	19.9724	1797	0.562392	19.9338	1797	0.060268	19.9285	1797	0.070569	19.9299
1798	0.001621	19.9766	1798	0.016227	19.9764	1798	0.010244	19.9791	1798	0.560024	19.9404	1798	0.060087	19.9351	1798	0.070489	19.9366
1799	0.001619	19.9832	1799	0.016172	19.983	1799	0.010245	19.9857	1799	0.558199	19.947	1799	0.05988	19.9418	1799	0.070472	19.9432
1800	0.001617	19.9898	1800	0.016119	19.9899	1800	0.010238	19.9923	1800	0.556591	19.9537	1800	0.05968	19.9484	1800	0.070468	19.9498
1801	0.001611	19.9965	1801	0.016065	19.9966	1801	0.010233	19.9992	1801	0.55493	19.9605	1801	0.059548	19.955	1801	0.070505	19.9565
1802	0.001607	20.0031	1802	0.016009	20.0032	1802	0.010227	20.0059	1802	0.552854	19.9672	1802	0.059427	19.9619	1802	0.070503	19.9633
1803	0.001609	20.0097	1803	0.015958	20.0098	1803	0.010224	20.0125	1803	0.550642	19.9738	1803	0.05944	19.9685	1803	0.070342	19.97
1804	0.001612	20.0164	1804	0.015915	20.0165	1804	0.010228	20.0191	1804	0.548211	19.9804	1804	0.059474	19.9752	1804	0.070163	19.9766
1805	0.001609	20.023	1805	0.015873	20.0231	1805	0.010235	20.0258	1805	0.546385	19.9871	1805	0.059486	19.9818	1805	0.069952	19.9833
1806	0.001605	20.0299	1806	0.01582	20.0297	1806	0.010253	20.0324	1806	0.54632	19.9937	1806	0.059483	19.9885	1806	0.069648	19.9899
1807	0.001603	20.0365	1807	0.015767	20.0364	1807	0.010271	20.039	1807	0.546324	20.0004	1807	0.059493	19.9951	1807	0.069407	19.9965
1808	0.001602	20.0432	1808	0.015722	20.0433	1808	0.010286	20.0457	1808	0.546018	20.007	1808	0.0595	20.0017	1808	0.069202	20.0032
1809	0.001609	20.0498	1809	0.015666	20.0499	1809	0.010299	20.0525	1809	0.545675	20.0139	1809	0.059512	20.0084	1809	0.068979	20.0098
1810	0.001615	20.0564	1810	0.015616	20.0565	1810	0.010317	20.0592	1810	0.546621	20.0205	1810	0.059507	20.0152	1810	0.06877	20.0167
1811	0.001622	20.0631	1811	0.015568	20.0632	1811	0.010341	20.0658	1811	0.547913	20.0271	1811	0.059475	20.0219	1811	0.068632	20.0233
1812	0.001631	20.0697	1812	0.015521	20.0698	1812	0.010392	20.0724	1812	0.549629	20.0338	1812	0.059383	20.0285	1812	0.068627	20.0299
1813	0.001635	20.0764	1813	0.01547	20.0764	1813	0.010448	20.0791	1813	0.551394	20.0404	1813	0.059264	20.0352	1813	0.068625	20.0366
1814	0.001642	20.0832	1814	0.015416	20.0831	1814	0.010505	20.0857	1814	0.552994	20.0471	1814	0.059134	20.0418	1814	0.068607	20.0432
1815	0.001649	20.0898	1815	0.01536	20.0897	1815	0.010568	20.0924	1815	0.554483	20.0537	1815	0.059016	20.0484	1815	0.068648	20.0498
1816	0.001655	20.0965	1816	0.015309	20.0966	1816	0.01064	20.099	1816	0.555287	20.0603	1816	0.058896	20.0551	1816	0.068766	20.0565
1817	0.001666	20.1031	1817	0.015258	20.1032	1817	0.01072	20.1059	1817	0.555819	20.0672	1817	0.058781	20.0617	1817	0.068872	20.0631
1818	0.001676	20.1098	1818	0.015206	20.1099	1818	0.010814	20.1125	1818	0.556643	20.0738	1818	0.05858	20.0686	1818	0.068843	20.07
1819	0.001685	20.1164	1819	0.015168	20.1165	1819	0.010913	20.1191	1819	0.557587	20.0805	1819	0.058381	20.0752	1819	0.068774	20.0766
1820	0.001692	20.123	1820	0.015114	20.1231	1820	0.011033	20.1258	1820	0.557479	20.0871	1820	0.058166	20.0818	1820	0.068785	20.0833
1821	0.001701	20.1297	1821	0.015055	20.1298	1821	0.011169	20.1324	1821	0.557115	20.0938	1821	0.057952	20.0885	1821	0.068825	20.0899
1822	0.001711	20.1365	1822	0.015	20.1364	1822	0.011311	20.1391	1822	0.556383	20.1004	1822	0.057861	20.0951	1822	0.06874	20.0965
1823	0.001724	20.1432	1823	0.014951	20.143	1823	0.011493	20.1457	1823	0.554776	20.107	1823	0.057806	20.1017	1823	0.068634	20.1032
1824	0.001728	20.1498	1824	0.014898	20.1499	1824	0.011699	20.1523	1824	0.553383	20.1137	1824	0.057735	20.1084	1824	0.068496	20.1098
1825	0.001733	20.1565	1825	0.01485	20.1565	1825	0.011928	20.1592	1825	0.552252	20.1206	1825	0.057659	20.115	1825	0.068312	20.1165
1826	0.001742	20.1631	1826	0.014806	20.1632	1826	0.012174	20.1658	1826	0.551337	20.1272	1826	0.057592	20.1219	1826	0.06814	20.1233
1827	0.001754	20.1697	1827	0.014757	20.1698	1827	0.012435	20.1725	1827	0.550301	20.1338	1827	0.057515	20.1285	1827	0.067956	20.13
1828	0.001761	20.1764	1828	0.014715	20.1764	1828	0.012706	20.1791	1828	0.549212	20.1405	1828	0.057522	20.1352	1828	0.067827	20.1366
1829	0.001766	20.183	1829	0.014677	20.1831	1829	0.013002	20.1857	1829	0.548505	20.1471	1829	0.057527	20.1418	1829	0.067614	20.1432
1830	0.001774	20.1899	1830	0.014643	20.1897	1830	0.013319	20.1924	1830	0.547827	20.1537	1830	0.057573	20.1485	1830	0.067315	20.1499
1831	0.001781	20.1965	1831	0.014617	20.1964	1831	0.013644	20.199	1831	0.545736	20.1604	1831	0.057632	20.1551	1831	0.067023	20.1565
1832	0.001783	20.2031	1832	0.014596	20.2032	1832	0.013965	20.2057	1832	0.543522	20.167	1832	0.057615	20.1617	1832	0.066763	20.1631
1833	0.001781	20.2098	1833	0.014576	20.2099	1833	0.014271	20.2125	1833	0.542746	20.1739	1833	0.057516	20.1684	1833	0.066517	20.1698
1834	0.00179	20.2164	1834	0.014558	20.2165	1834	0.014572	20.2192	1834	0.542278	20.1805	1834	0.057424	20.1752	1834	0.066321	20.1766
1835	0.0018	20.2231	1835	0.014542	20.2232	1835	0.014863	20.2258	1835	0.542124	20.1871	1835	0.057302	20.1819	1835	0.066167	20.1833
1836	0.001809	20.2297	1836	0.014529	20.2298	1836	0.015135	20.2324	1836	0.542303	20.1938	1836	0.057184	20.1885	1836	0.066018	20.1899
1837	0.001813	20.2363	1837	0.014527	20.2364	1837	0.015415	20.2391	1837	0.542537	20.2004	1837	0.057049	20.1951	1837	0.065794	20.1965
1838	0.001822	20.2432	1838	0.014515	20.2431	1838	0.015692	20.2457	1838	0.542489	20.207	1838	0.056916	20.2018	1838	0.065636	20.2032
1839	0.001832	20.2498	1839	0.0145	20.2497	1839	0.01596	20.2523	1839	0.541593	20.2137	1839	0.056747	20.2084	1839	0.065654	20.2098
1840	0.001841	20.2565	1840	0.014493	20.2566	1840	0.016196	20.259	1840	0.539898	20.2203	1840	0.05656	20.2151	1840	0.065655	20.2165
1841	0.001848	20.2631	1841	0.014486	20.2632	1841	0.016439	20.2659	1841	0.539667	20.2272	1841	0.05636	20.2217	1841	0.065611	20.2231
1842	0.001859	20.2697	1842	0.014485	20.2698	1842	0.016673	20.2725	1842	0.540249	20.2338	1842	0.056158	20.2286	1842	0.065569	20.23
1843	0.001872	20.2764	1843	0.01449	20.2765	1843	0.016889	20.2791	1843	0.540137	20.2405	1843	0.056011	20.2352	1843	0.065464	20.2366
1844	0.001881	20.283	1844	0.014511	20.2831	1844	0.017095	20.2858	1844	0.539087	20.2471	1844	0.055871	20.2418	1844	0.065328	20.2433
1845	0.001891	20.2897	1845	0.014541	20.2897	1845	0.017311	20.2924	1845	0.537541	20.2537	1845	0.055779	20.2485	1845	0.065175	20.2499
1846	0.001903	20.2965	1846	0.014581	20.2964	1846	0.017529	20.299	1846	0.535343	20.2604	1846	0.055705	20.2551	1846	0.065007	20.2565
1847	0.001916	20.3032	1847	0.014631	20.303	1847	0.017722	20.3057	1847	0.53342	20.267	1847	0.055633	20.2617	1847	0.065013	20.2632
1848	0.001929	20.3098	1848	0.014702	20.3099	1848	0.017894	20.3123	1848	0.53294	20.2736	1848	0.055527	20.2684	1848	0.065102	20.2698
1849	0.001941	20.3164	1849	0.014805	20.3165	1849	0.018059	20.3192	1849	0.532869	20.2805	1849	0.055475	20.275	1849	0.065089	20.2764
1850	0.001956	20.3231	1850	0.014934	20.3232	1850	0.018228	20.3258	1850	0.533786	20.2872	1850	0.055456	20.2819	1850	0.065005	20.2833
1851	0.001975	20.3297	1851	0.015098	20.3298	1851	0.018392	20.3325	1851	0.534613	20.2938	1851	0.055449	20.2885	1851	0.064912	20.2899
1852	0.001992	20.3364	1852	0.015312	20.3364	1852	0.018557	20.3391	1852	0.534486	20.3004	1852	0.055453	20.2951	1852	0.064808	20.2966
1853	0.002009	20.343	1853	0.015558	20.3431	1853	0.018724	20.3457	1853	0.53424	20.3071	1853	0.055448	20.3018	1853	0.064744	20.3032
1854	0.002025	20.3499	1854	0.015832	20.3497	1854	0.018895	20.3524	1854	0.534474	20.3137	1854	0.055423	20.3084	1854	0.064624	20.3099
1855	0.002041	20.3565	1855	0.016161	20.3563	1855	0.019057	20.359	1855	0.534668	20.3204	1855	0.055383	20.3151	1855	0.064552	20.3165
1856	0.002053	20.3632	1856	0.016531	20.3632	1856	0.019223	20.3656	1856	0.534892	20.327	1856	0.055307	20.3217	1856	0.064644	20.3231
1857	0.002064	20.3698	1857	0.016931	20.3698	1857	0.019392	20.3725	1857	0.534867	20.3339	1857	0.055251	20.3283	1857	0.064648	20.3298
1858	0.002075	20.3764	1858	0.017374	20.3765	1858	0.019579	20.3791	1858	0.534329	20.3405	1858	0.05519	20.3352	1858	0.064526	20.3366
1859	0.002093	20.3831	1859	0.017848	20.3831	1859	0.019777	20.3858	1859	0.534482	20.3471	1859	0.05511	20.3419	1859	0.064448	20.3433
1860	0.002105	20.3897	1860	0.018342	20.3898	1860	0.019982	20.3924	1860	0.534556	20.3538	1860	0.055027	20.3485	1860	0.064399	20.3499
1861	0.002115	20.3963	1861	0.018847	20.3964	1861	0.020184	20.3991	1861	0.53483	20.3604	1861	0.054948	20.3551	1861	0.064354	20.3565
1862	0.002128	20.4032	1862	0.019354	20.4031	1862	0.020388	20.4057	1862	0.535688	20.367	1862	0.054805	20.3618	1862	0.064117	20.3632
1863	0.002138	20.4098	1863	0.019859	20.4097	1863	0.020597	20.4123	1863	0.536819	20.3737	1863	0.054617	20.3684	1863	0.063897	20.3698
1864	0.002145	20.4165	1864	0.020361	20.4166	1864	0.02081	20.419	1864	0.537848	20.3803	1864	0.05447	20.375	1864	0.063845	20.3765
1865	0.002149	20.4231	1865	0.020834	20.4232	1865	0.021034	20.4258	1865	0.538245	20.3872	1865	0.054349	20.3817	1865	0.063785	20.3831
1866	0.002161	20.4297	1866	0.021302	20.4298	1866	0.021269	20.4325	1866	0.539022	20.3938	1866	0.054222	20.3885	1866	0.063494	20.39
1867	0.002175	20.4364	1867	0.02175	20.4365	1867	0.021511	20.4391	1867	0.540705	20.4004	1867	0.054051	20.3952	1867	0.063173	20.3966
1868	0.002188	20.443	1868	0.022164	20.4431	1868	0.021757	20.4457	1868	0.5417	20.4071	1868	0.053931	20.4018	1868	0.062936	20.4032
1869	0.002195	20.4496	1869	0.022554	20.4497	1869	0.021999	20.4524	1869	0.541207	20.4137	1869	0.05384	20.4084	1869	0.062721	20.4099
1870	0.002206	20.4565	1870	0.022918	20.4564	1870	0.022245	20.459	1870	0.540532	20.4204	1870	0.053722	20.4151	1870	0.06254	20.4165
1871	0.002217	20.4631	1871	0.023254	20.463	1871	0.022485	20.4657	1871	0.539872	20.427	1871	0.053542	20.4217	1871	0.062357	20.4231
1872	0.002227	20.4698	1872	0.02355	20.4699	1872	0.022732	20.4723	1872	0.539185	20.4337	1872	0.053423	20.4284	1872	0.062408	20.4298
1873	0.002236	20.4764	1873	0.02384	20.4765	1873	0.023006	20.4792	1873	0.538956	20.4405	1873	0.053371	20.435	1873	0.062514	20.4364
1874	0.002251	20.4831	1874	0.024109	20.4832	1874	0.023278	20.4858	1874	0.539035	20.4472	1874	0.053295	20.4419	1874	0.062526	20.4433
1875	0.00227	20.4897	1875	0.024359	20.4898	1875	0.023545	20.4924	1875	0.539034	20.4538	1875	0.053247	20.4485	1875	0.062498	20.4499
1876	0.002282	20.4963	1876	0.024579	20.4964	1876	0.023832	20.4991	1876	0.538665	20.4582	1876	0.053229	20.4551	1876	0.062519	20.4566
1877	0.002289	20.503	1877	0.024786	20.5031	1877	0.024103	20.5057	1877	0.53838	20.4582	1877	0.053242	20.4586	1877	0.062455	20.459
1878	0.0023	20.5098	1878	0.024982	20.5097	1878	0.024379	20.5124	1878	0.538574	20.4589	1878	0.053249	20.4586	1878	0.062357	20.459
1879	0.002315	20.5165	1879	0.025155	20.5163	1879	0.024682	20.519	1879	0.539005	20.4613	1879	0.053198	20.4595	1879	0.062272	20.4602
1880	0.002328	20.5231	1880	0.025326	20.5232	1880	0.025001	20.5256	1880	0.538994	20.4654	1880	0.053157	20.462	1880	0.062185	20.4631
1881	0.002341	20.5297	1881	0.025505	20.5298	1881	0.025329	20.5325	1881	0.538632	20.4713	1881	0.053177	20.4663	1881	0.061991	20.4677
1882	0.002354	20.5364	1882	0.02568	20.5365	1882	0.025663	20.5391	1882	0.53814	20.4779	1882	0.053197	20.4723	1882	0.061767	20.474
1883	0.002369	20.543	1883	0.025838	20.5431	1883	0.025991	20.5458	1883	0.536861	20.4845	1883	0.05319	20.479	1883	0.061492	20.4807
1884	0.002374	20.5497	1884	0.026011	20.5498	1884	0.02635	20.5524	1884	0.534862	20.4914	1884	0.053177	20.4856	1884	0.061227	20.4873
1885	0.002379	20.5563	1885	0.026201	20.5563	1885	0.026723	20.559	1885	0.533845	20.498	1885	0.053058	20.4925	1885	0.06097	20.4942
1886	0.002383	20.5587	1886	0.026401	20.5584	1886	0.027078	20.5644	1886	0.533663	20.5047	1886	0.052908	20.4991	1886	0.060745	20.5008
1887	0.002393	20.5612	1887	0.026617	20.5608	1887	0.027473	20.5664	1887	0.53263	20.5113	1887	0.052807	20.5057	1887	0.060737	20.5074
1888	0.002404	20.565	1888	0.026872	20.5647	1888	0.027884	20.5691	1888	0.530859	20.5179	1888	0.052734	20.5124	1888	0.060769	20.5141
1889	0.002412	20.5705	1889	0.027144	20.5703	1889	0.028277	20.5735	1889	0.529709	20.5246	1889	0.052708	20.519	1889	0.060765	20.5207
1890	0.002419	20.5771	1890	0.027419	20.5771	1890	0.028635	20.5795	1890	0.529304	20.5312	1890	0.052695	20.5257	1890	0.060769	20.5274
1891	0.002426	20.5837	1891	0.027716	20.5838	1891	0.029054	20.5864	1891	0.529018	20.5378	1891	0.05268	20.5323	1891	0.060857	20.534
1892	0.002429	20.5903	1892	0.027995	20.5904	1892	0.029451	20.5931	1892	0.529148	20.5447	1892	0.052666	20.5389	1892	0.060921	20.5406
1893	0.002432	20.597	1893	0.028271	20.597	1893	0.029813	20.5997	1893	0.529551	20.5513	1893	0.052632	20.5458	1893	0.060994	20.5475
1894	0.002444	20.6036	1894	0.028544	20.6037	1894	0.030192	20.6063	1894	0.529907	20.558	1894	0.052538	20.5525	1894	0.061066	20.5541
1895	0.002453	20.6102	1895	0.028847	20.6103	1895	0.030554	20.613	1895	0.530067	20.5646	1895	0.052498	20.5591	1895	0.061177	20.5608
1896	0.002462	20.6171	1896	0.029123	20.617	1896	0.030905	20.6196	1896	0.52944	20.5713	1896	0.052515	20.5657	1896	0.061345	20.5674
1897	0.002469	20.6237	1897	0.029364	20.6236	1897	0.031233	20.6262	1897	0.528874	20.5779	1897	0.052498	20.5724	1897	0.061398	20.5741
1898	0.002476	20.6304	1898	0.029549	20.6305	1898	0.03154	20.6329	1898	0.530114	20.5845	1898	0.052381	20.579	1898	0.061294	20.5807
1899	0.002481	20.637	1899	0.029791	20.6371	1899	0.03191	20.6397	1899	0.531719	20.5912	1899	0.05226	20.5856	1899	0.061184	20.5873
1900	0.002486	20.6436	1900	0.030082	20.6438	1900	0.03237	20.6464	1900	0.532663	20.598	1900	0.052087	20.5923	1900	0.060961	20.594
1901	0.002488	20.6503	1901	0.030409	20.6504	1901	0.032875	20.653	1901	0.533436	20.6047	1901	0.051908	20.5991	1901	0.060763	20.6008
1902	0.002492	20.6569	1902	0.03085	20.657	1902	0.033461	20.6596	1902	0.533441	20.6113	1902	0.051737	20.6058	1902	0.060642	20.6075
1903	0.002496	20.6636	1903	0.031329	20.6637	1903	0.034101	20.6663	1903	0.533152	20.618	1903	0.051594	20.6124	1903	0.060523	20.6141
1904	0.002499	20.6704	1904	0.031836	20.6703	1904	0.034719	20.6729	1904	0.533484	20.6246	1904	0.051515	20.6191	1904	0.06046	20.6207
1905	0.002502	20.6771	1905	0.032365	20.6769	1905	0.035427	20.6796	1905	0.533752	20.6312	1905	0.051431	20.6257	1905	0.060379	20.6274
1906	0.002506	20.6837	1906	0.032936	20.6838	1906	0.036182	20.6862	1906	0.534417	20.6379	1906	0.051323	20.6323	1906	0.060162	20.634
1907	0.00251	20.6903	1907	0.033569	20.6904	1907	0.036987	20.6931	1907	0.53534	20.6445	1907	0.051217	20.639	1907	0.05995	20.6407
1908	0.002512	20.697	1908	0.034279	20.6971	1908	0.037925	20.6997	1908	0.534866	20.6514	1908	0.051162	20.6456	1908	0.059877	20.6473
1909	0.002512	20.7036	1909	0.035059	20.7037	1909	0.038887	20.7064	1909	0.534164	20.658	1909	0.051089	20.6525	1909	0.05982	20.6542
1910	0.002513	20.7102	1910	0.035852	20.7103	1910	0.039835	20.713	1910	0.533911	20.6647	1910	0.051061	20.6591	1910	0.059898	20.6608
1911	0.002515	20.7169	1911	0.036634	20.717	1911	0.040761	20.7196	1911	0.534158	20.6713	1911	0.051036	20.6657	1911	0.05999	20.6674
1912	0.002519	20.7237	1912	0.037405	20.7236	1912	0.041724	20.7263	1912	0.534655	20.6779	1912	0.050989	20.6724	1912	0.060026	20.6741
1913	0.002526	20.7304	1913	0.038191	20.7302	1913	0.042681	20.7329	1913	0.534031	20.6846	1913	0.050924	20.679	1913	0.060058	20.6807
1914	0.002535	20.737	1914	0.038979	20.7371	1914	0.04364	20.7395	1914	0.533467	20.6912	1914	0.050867	20.6856	1914	0.060067	20.6873
1915	0.002542	20.7437	1915	0.039755	20.7437	1915	0.044553	20.7464	1915	0.532934	20.6978	1915	0.050823	20.6923	1915	0.060116	20.694
1916	0.00255	20.7503	1916	0.040585	20.7504	1916	0.045443	20.753	1916	0.532231	20.7047	1916	0.050763	20.6989	1916	0.060236	20.7006
1917	0.002559	20.7569	1917	0.041426	20.757	1917	0.046287	20.7597	1917	0.530685	20.7113	1917	0.050649	20.7058	1917	0.060337	20.7075
1918	0.002565	20.7636	1918	0.042261	20.7637	1918	0.047001	20.7663	1918	0.529026	20.718	1918	0.050559	20.7124	1918	0.060409	20.7141
1919	0.002571	20.7702	1919	0.043027	20.7703	1919	0.047613	20.773	1919	0.527757	20.7246	1919	0.05051	20.719	1919	0.060475	20.7208
1920	0.002575	20.7771	1920	0.043809	20.7769	1920	0.048135	20.7796	1920	0.526525	20.7312	1920	0.050461	20.7257	1920	0.060512	20.7274
1921	0.002575	20.7837	1921	0.044596	20.7836	1921	0.048532	20.7862	1921	0.524978	20.7379	1921	0.050401	20.7323	1921	0.060461	20.734
1922	0.002573	20.7904	1922	0.045362	20.7904	1922	0.048773	20.7929	1922	0.523682	20.7445	1922	0.050352	20.739	1922	0.060412	20.7407
1923	0.002573	20.797	1923	0.046237	20.7971	1923	0.048912	20.7997	1923	0.524186	20.7512	1923	0.050322	20.7456	1923	0.060345	20.7473
1924	0.002574	20.8036	1924	0.047165	20.8037	1924	0.048944	20.8064	1924	0.524972	20.758	1924	0.050285	20.7522	1924	0.060247	20.7539
1925	0.002578	20.8103	1925	0.048139	20.8103	1925	0.048851	20.813	1925	0.525594	20.7647	1925	0.05021	20.7591	1925	0.059991	20.7608
1926	0.00258	20.8169	1926	0.049202	20.817	1926	0.048631	20.8196	1926	0.526035	20.7713	1926	0.050148	20.7658	1926	0.059746	20.7675
1927	0.002585	20.8235	1927	0.050403	20.8236	1927	0.048295	20.8263	1927	0.526989	20.778	1927	0.050148	20.7724	1927	0.059561	20.7741
1928	0.002585	20.8304	1928	0.051699	20.8303	1928	0.047849	20.8329	1928	0.527843	20.7846	1928	0.05015	20.779	1928	0.059378	20.7807
1929	0.002583	20.837	1929	0.053073	20.8369	1929	0.047292	20.8395	1929	0.528098	20.7912	1929	0.050072	20.7857	1929	0.059074	20.7874
1930	0.002585	20.8437	1930	0.054648	20.8438	1930	0.046583	20.8462	1930	0.528202	20.7979	1930	0.049963	20.7923	1930	0.058738	20.794
1931	0.002593	20.8503	1931	0.05636	20.8504	1931	0.045767	20.853	1931	0.528277	20.8045	1931	0.049924	20.7989	1931	0.058469	20.8006
1932	0.002603	20.857	1932	0.058224	20.8571	1932	0.044864	20.8597	1932	0.528373	20.8114	1932	0.049931	20.8056	1932	0.058195	20.8073
1933	0.002604	20.8636	1933	0.060291	20.8637	1933	0.043853	20.8663	1933	0.527682	20.818	1933	0.049876	20.8124	1933	0.058023	20.8141
1934	0.002612	20.8702	1934	0.062582	20.8703	1934	0.042706	20.873	1934	0.52557	20.8246	1934	0.049767	20.8191	1934	0.057904	20.8208
1935	0.002616	20.8769	1935	0.065023	20.877	1935	0.041474	20.8796	1935	0.523824	20.8313	1935	0.049689	20.8257	1935	0.057867	20.8274
1936	0.002619	20.8837	1936	0.06763	20.8836	1936	0.04018	20.8863	1936	0.522933	20.8379	1936	0.049624	20.8324	1936	0.057798	20.834
1937	0.002614	20.8904	1937	0.070503	20.8902	1937	0.038756	20.8929	1937	0.522157	20.8446	1937	0.049558	20.839	1937	0.057717	20.8407
1938	0.002616	20.897	1938	0.073534	20.8971	1938	0.037259	20.8995	1938	0.52165	20.8512	1938	0.049511	20.8456	1938	0.057669	20.8473
1939	0.002621	20.9036	1939	0.076713	20.9037	1939	0.035721	20.9064	1939	0.521038	20.8578	1939	0.049515	20.8523	1939	0.057744	20.854
1940	0.002624	20.9103	1940	0.080001	20.9104	1940	0.034183	20.913	1940	0.518602	20.8647	1940	0.049533	20.8589	1940	0.057883	20.8606
1941	0.002612	20.9169	1941	0.08343	20.917	1941	0.032579	20.9197	1941	0.516149	20.8713	1941	0.049493	20.8658	1941	0.058026	20.8675
1942	0.002607	20.9236	1942	0.086878	20.9236	1942	0.030957	20.9263	1942	0.514367	20.878	1942	0.049397	20.8724	1942	0.058105	20.8741
1943	0.002607	20.9302	1943	0.090179	20.9303	1943	0.02938	20.933	1943	0.513048	20.8846	1943	0.049354	20.879	1943	0.058104	20.8807
1944	0.002598	20.9371	1944	0.093474	20.9369	1944	0.027836	20.9396	1944	0.512753	20.8912	1944	0.04932	20.8857	1944	0.058056	20.8874
1945	0.002586	20.9437	1945	0.096665	20.9436	1945	0.026306	20.9462	1945	0.512271	20.8979	1945	0.04928	20.8923	1945	0.058039	20.894
1946	0.002574	20.9503	1946	0.099656	20.9504	1946	0.024815	20.9529	1946	0.511834	20.9045	1946	0.049236	20.8989	1946	0.057995	20.9006
1947	0.002565	20.957	1947	0.102349	20.9571	1947	0.023438	20.9597	1947	0.511558	20.9112	1947	0.049183	20.9056	1947	0.05792	20.9073
1948	0.002558	20.9636	1948	0.10479	20.9637	1948	0.022076	20.9664	1948	0.511049	20.918	1948	0.049084	20.9122	1948	0.057831	20.9139
1949	0.002549	20.9703	1949	0.106955	20.9704	1949	0.020774	20.973	1949	0.510617	20.9246	1949	0.048986	20.9191	1949	0.057743	20.9208
1950	0.002541	20.9769	1950	0.108719	20.977	1950	0.01955	20.9796	1950	0.512294	20.9313	1950	0.04886	20.9257	1950	0.057708	20.9274
1951	0.002539	20.9835	1951	0.110066	20.9836	1951	0.018426	20.9863	1951	0.51416	20.9379	1951	0.048724	20.9324	1951	0.057727	20.9341
1952	0.002533	20.9904	1952	0.111103	20.9903	1952	0.017351	20.9929	1952	0.51504	20.9446	1952	0.048578	20.939	1952	0.057671	20.9407
1953	0.002523	20.997	1953	0.11185	20.9969	1953	0.016325	20.9995	1953	0.515608	20.9512	1953	0.048428	20.9456	1953	0.057432	20.9473
1954	0.002511	21.0037	1954	0.112112	21.0038	1954	0.015392	21.0062	1954	0.516533	20.9578	1954	0.048342	20.9523	1954	0.057188	20.954
1955	0.002505	21.0103	1955	0.11205	21.0104	1955	0.014529	21.013	1955	0.517836	20.9645	1955	0.04827	20.9589	1955	0.056945	20.9606
1956	0.002499	21.017	1956	0.111673	21.017	1956	0.013705	21.0197	1956	0.518075	20.9713	1956	0.048187	20.9656	1956	0.056805	20.9672
1957	0.002494	21.0236	1957	0.110943	21.0237	1957	0.012936	21.0263	1957	0.517522	20.978	1957	0.048097	20.9724	1957	0.056773	20.9741
1958	0.002486	21.0302	1958	0.109822	21.0303	1958	0.012265	21.033	1958	0.517036	20.9846	1958	0.048022	20.9791	1958	0.056733	20.9808
1959	0.002476	21.0369	1959	0.10845	21.0369	1959	0.011618	21.0396	1959	0.516562	20.9913	1959	0.047939	20.9857	1959	0.056721	20.9874
1960	0.002467	21.0437	1960	0.106857	21.0436	1960	0.011009	21.0462	1960	0.515712	20.9979	1960	0.047899	20.9924	1960	0.05663	20.994
1961	0.002463	21.0504	1961	0.104983	21.0502	1961	0.010446	21.0529	1961	0.51407	21.0045	1961	0.047868	20.999	1961	0.056494	21.0007
1962	0.002454	21.057	1962	0.102837	21.0571	1962	0.00994	21.0595	1962	0.512737	21.0112	1962	0.047855	21.0056	1962	0.056502	21.0073
1963	0.00245	21.0636	1963	0.100511	21.0637	1963	0.009464	21.0664	1963	0.512232	21.0178	1963	0.04784	21.0123	1963	0.056521	21.0139
1964	0.002452	21.0703	1964	0.098077	21.0704	1964	0.009023	21.073	1964	0.511488	21.0247	1964	0.047807	21.0189	1964	0.056529	21.0206
1965	0.002455	21.0769	1965	0.095382	21.077	1965	0.008616	21.0796	1965	0.510992	21.0313	1965	0.047775	21.0258	1965	0.056504	21.0274
1966	0.002452	21.0835	1966	0.092595	21.0836	1966	0.008231	21.0863	1966	0.510854	21.0379	1966	0.047749	21.0324	1966	0.056431	21.0341
1967	0.002448	21.0902	1967	0.08973	21.0903	1967	0.007871	21.0929	1967	0.511343	21.0446	1967	0.047707	21.039	1967	0.0563	21.0407
1968	0.002443	21.0971	1968	0.086872	21.0969	1968	0.007534	21.0996	1968	0.511845	21.0512	1968	0.047673	21.0457	1968	0.056169	21.0474
1969	0.002437	21.1037	1969	0.083896	21.1035	1969	0.007238	21.1062	1969	0.511129	21.0579	1969	0.04766	21.0523	1969	0.056001	21.054
1970	0.002428	21.1103	1970	0.080896	21.1104	1970	0.006945	21.1128	1970	0.510291	21.0645	1970	0.047649	21.0589	1970	0.05583	21.0606
1971	0.002418	21.117	1971	0.078023	21.117	1971	0.006668	21.1197	1971	0.509603	21.0711	1971	0.047593	21.0656	1971	0.05563	21.0673
1972	0.002413	21.1236	1972	0.075111	21.1237	1972	0.006396	21.1263	1972	0.508719	21.078	1972	0.047529	21.0722	1972	0.055409	21.0739
1973	0.002404	21.1303	1973	0.072235	21.1303	1973	0.006141	21.133	1973	0.50721	21.0846	1973	0.047474	21.0791	1973	0.055349	21.0808
1974	0.002393	21.1369	1974	0.069423	21.137	1974	0.0059	21.1396	1974	0.505669	21.0913	1974	0.047416	21.0857	1974	0.055289	21.0874
1975	0.002378	21.1435	1975	0.066759	21.1436	1975	0.005674	21.1462	1975	0.503828	21.0979	1975	0.047335	21.0924	1975	0.055251	21.0941
1976	0.002364	21.1504	1976	0.064121	21.1502	1976	0.005474	21.1529	1976	0.502259	21.1046	1976	0.047251	21.099	1976	0.055207	21.1007
1977	0.00235	21.157	1977	0.061569	21.1569	1977	0.005279	21.1595	1977	0.500983	21.1112	1977	0.047158	21.1056	1977	0.055113	21.1073
1978	0.002337	21.1637	1978	0.059155	21.1638	1978	0.00509	21.1662	1978	0.50013	21.1178	1978	0.047042	21.1123	1978	0.054982	21.114
1979	0.002329	21.1703	1979	0.05681	21.1704	1979	0.004904	21.173	1979	0.500211	21.1245	1979	0.046916	21.1189	1979	0.054861	21.1206
1980	0.00232	21.1769	1980	0.054528	21.177	1980	0.004737	21.1797	1980	0.499803	21.1313	1980	0.04679	21.1255	1980	0.054796	21.1273
1981	0.002312	21.1836	1981	0.052313	21.1837	1981	0.004582	21.1863	1981	0.500004	21.138	1981	0.046705	21.1324	1981	0.054755	21.1341
1982	0.002304	21.1902	1982	0.050295	21.1903	1982	0.004437	21.1929	1982	0.500859	21.1446	1982	0.046623	21.139	1982	0.054645	21.1408
1983	0.002299	21.1968	1983	0.048292	21.1969	1983	0.004294	21.1996	1983	0.501739	21.1512	1983	0.046525	21.1457	1983	0.054541	21.1474
1984	0.002283	21.2037	1984	0.046364	21.2036	1984	0.004152	21.2062	1984	0.502441	21.1579	1984	0.046395	21.1523	1984	0.054565	21.154
1985	0.002268	21.2103	1985	0.044582	21.2102	1985	0.004018	21.2128	1985	0.502844	21.1645	1985	0.04627	21.159	1985	0.054607	21.1607
1986	0.002262	21.217	1986	0.042854	21.2171	1986	0.003896	21.2195	1986	0.503381	21.1712	1986	0.046139	21.1656	1986	0.054593	21.1673
1987	0.002258	21.2236	1987	0.041166	21.2237	1987	0.00377	21.2264	1987	0.503611	21.1778	1987	0.046044	21.1722	1987	0.05458	21.1739
1988	0.002253	21.2302	1988	0.039555	21.2304	1988	0.003654	21.233	1988	0.502152	21.1847	1988	0.045999	21.1789	1988	0.054521	21.1806
1989	0.002246	21.2369	1989	0.038099	21.237	1989	0.003547	21.2396	1989	0.500894	21.1913	1989	0.04595	21.1857	1989	0.054433	21.1874
1990	0.002245	21.2435	1990	0.036658	21.2436	1990	0.003442	21.2463	1990	0.500816	21.1979	1990	0.045838	21.1924	1990	0.054327	21.1941
1991	0.002242	21.2502	1991	0.035275	21.2503	1991	0.003339	21.2529	1991	0.500655	21.2046	1991	0.045733	21.199	1991	0.054242	21.2007
1992	0.002238	21.257	1992	0.033977	21.2569	1992	0.003241	21.2596	1992	0.500126	21.2112	1992	0.045623	21.2057	1992	0.054265	21.2073
1993	0.002229	21.2637	1993	0.032766	21.2635	1993	0.003154	21.2662	1993	0.499657	21.2178	1993	0.045529	21.2123	1993	0.054307	21.214
1994	0.002227	21.2703	1994	0.031572	21.2704	1994	0.003069	21.2728	1994	0.498765	21.2245	1994	0.045448	21.2189	1994	0.054139	21.2206
1995	0.002224	21.2769	1995	0.030435	21.277	1995	0.002992	21.2797	1995	0.497474	21.2311	1995	0.045358	21.2256	1995	0.053834	21.2273
1996	0.002218	21.2836	1996	0.029412	21.2837	1996	0.002918	21.2863	1996	0.495893	21.238	1996	0.045322	21.2322	1996	0.053619	21.2339
1997	0.002212	21.2902	1997	0.028412	21.2903	1997	0.002858	21.293	1997	0.494441	21.2446	1997	0.045332	21.2391	1997	0.053452	21.2407
[truncated: 114 more rows]
