# Supplementary material for: Design of amyloidogenic peptide traps
Source: Nat Chem Biol. 2024 Mar 19;20(8):981–90. doi: 10.1038/s41589-024-01578-5 (PMC11288891; doi:10.1038/s41589-024-01578-5)
Supplement: Supplementary file 17 — Statistical source data. [file 41589_2024_1578_MOESM17_ESM.xlsx]

## Sheet: Extended Data Fig. 8a
Microfluidic diffusional sizing raw data										Microfluidic diffusional sizing fitting
[DAm12]	[Ab]	R1	R2	R3	R4	Average	SD			X_fit	DAm12_radius_fit	DAm14_radius_fit	DAm15_radius_fit
20	0.2	2.09	2.19		2.75	2.34333	0.29044			0.01	1.7726	1.76466	1.75805
10	0.2	1.99	2.44	2.7		2.37667	0.293295			0.02	1.7947	1.77899	1.76597
2	0.2	2.41	2.37	2.97	2.53	2.57	0.238328			0.03	1.81628	1.79298	1.77376
0.5	0.2	2.37	2.41	2.13	2.22	2.2825	0.112999			0.04	1.83734	1.80665	1.78143
0.2	0.2	2.1	2.13	2.23		2.15333	0.0555778			0.05	1.85784	1.81999	1.78897
0.1	0.2	1.93	1.68	1.96	1.81	1.845	0.110567			0.06	1.87777	1.83302	1.7964
0.05	0.2	1.84	1.75	1.74		1.77667	0.0449691			0.07	1.89712	1.84574	1.8037
0.02	0.2	1.87	1.72	1.91		1.83333	0.0817856			0.08	1.91587	1.85816	1.81089
0	2	1.8	1.69	1.77		1.75333	0.046428			0.09	1.93402	1.87028	1.81797
										0.1	1.95155	1.88211	1.82493
										0.2	2.09295	1.98575	1.88883
[DAm14]	[Ab]	R1	R2	R3	R4	Average	SD			0.3	2.18133	2.06696	1.9436
20	0.2	2.64	2.54	2.37		2.51667	0.111455			0.4	2.23522	2.13103	1.99083
10	0.2	2.48	2.26	2.66	2.9	2.575	0.235106			0.5	2.26941	2.18217	2.03181
5	0.2	2.62	2.28	2.73		2.54333	0.191543			0.6	2.29237	2.22354	2.06759
2	0.2	2.41	2.46	2.21		2.36	0.108012			0.7	2.30861	2.25747	2.09902
0.5	0.2	2.25	2.32	2.23		2.26667	0.0385861			0.8	2.32063	2.28568	2.12679
0.4	0.2	2.14	2.22	2.17	2.23	2.19	0.0367423			0.9	2.32983	2.30941	2.15148
0.3	0.2	1.96	2.07	1.99		2.00667	0.046428			1	2.33709	2.32962	2.17353
0.2	0.2	1.88	1.8	2		1.89333	0.0821922			1.1	2.34295	2.34699	2.19333
0.05	0.2	1.77	1.77	1.85		1.79667	0.0377124			1.2	2.34778	2.36207	2.21119
0.02	0.2	1.83	2	1.86		1.89667	0.074087			1.3	2.35183	2.37526	2.22738
0	2	1.8	1.69	1.77		1.75333	0.046428			1.4	2.35526	2.3869	2.2421
										1.5	2.35821	2.39723	2.25555
										1.6	2.36077	2.40646	2.26787
[DAm15]	[Ab]	R1	R2	R3	R4	Average	SD			1.7	2.36302	2.41475	2.2792
20	0.2	2.61	2.33	2.63		2.52333	0.136951			1.8	2.365	2.42224	2.28965
10	0.2	2.53	2.44	2.5		2.49	0.0374166			1.9	2.36676	2.42903	2.29932
5	0.2	2.42	2.49	2.39		2.43333	0.0418994			2	2.36834	2.43522	2.30828
2	0.2	2.11	2.47	2.37		2.31667	0.151731			2.1	2.36977	2.44088	2.31662
1	0.2	1.97	2.05	2.21		2.07667	0.0997775			2.2	2.37105	2.44608	2.32439
0.5	0.2	2.05	2.08	2.05		2.06	0.0141421			2.3	2.37223	2.45087	2.33165
0.2	0.2	1.97	1.89	2.01		1.95667	0.0498888			2.4	2.37329	2.4553	2.33845
0.05	0.2	1.83	1.9	1.92		1.88333	0.0385861			2.5	2.37427	2.4594	2.34483
0.02	0.2	1.91	1.81	1.77		1.83	0.0588784			2.6	2.37518	2.46321	2.35082
0	2	1.8	1.69	1.77		1.75333	0.046428			2.7	2.37601	2.46676	2.35646
										2.8	2.37678	2.47008	2.36178
										2.9	2.3775	2.47319	2.36681
										3	2.37816	2.4761	2.37156
										3.1	2.37879	2.47883	2.37607
										3.2	2.37937	2.48141	2.38034
										3.3	2.37991	2.48384	2.3844
										3.4	2.38043	2.48613	2.38826
										3.5	2.38091	2.4883	2.39194
										3.6	2.38136	2.49036	2.39544
										3.7	2.38179	2.49231	2.39879
										3.8	2.3822	2.49416	2.40199
										3.9	2.38259	2.49593	2.40504
										4	2.38295	2.49761	2.40797
										4.1	2.3833	2.49921	2.41077
										4.2	2.38363	2.50074	2.41346
										4.3	2.38394	2.5022	2.41604
										4.4	2.38424	2.50359	2.41852
										4.5	2.38453	2.50493	2.42091
										4.6	2.3848	2.50621	2.4232
										4.7	2.38506	2.50744	2.4254
										4.8	2.38531	2.50862	2.42753
										4.9	2.38555	2.50976	2.42958
										5	2.38578	2.51085	2.43156
										5.1	2.386	2.5119	2.43347
										5.2	2.38622	2.51291	2.43531
										5.3	2.38642	2.51388	2.43709
										5.4	2.38662	2.51482	2.43881
										5.5	2.3868	2.51572	2.44048
										5.6	2.38699	2.5166	2.44209
										5.7	2.38716	2.51744	2.44366
										5.8	2.38733	2.51826	2.44517
										5.9	2.3875	2.51905	2.44664
										6	2.38765	2.51981	2.44806
										6.1	2.38781	2.52055	2.44944
										6.2	2.38795	2.52127	2.45078
										6.3	2.3881	2.52196	2.45209
										6.4	2.38823	2.52263	2.45335
										6.5	2.38837	2.52329	2.45458
										6.6	2.3885	2.52392	2.45578
										6.7	2.38862	2.52454	2.45694
										6.8	2.38875	2.52513	2.45807
										6.9	2.38887	2.52571	2.45917
										7	2.38898	2.52628	2.46025
										7.1	2.38909	2.52683	2.46129
										7.2	2.3892	2.52736	2.46231
										7.3	2.38931	2.52788	2.4633
										7.4	2.38941	2.52839	2.46427
										7.5	2.38951	2.52888	2.46522
										7.6	2.38961	2.52936	2.46614
										7.7	2.3897	2.52983	2.46704
										7.8	2.38979	2.53029	2.46792
										7.9	2.38988	2.53073	2.46877
										8	2.38997	2.53117	2.46961
										8.1	2.39006	2.53159	2.47043
										8.2	2.39014	2.532	2.47123
										8.3	2.39022	2.53241	2.47201
										8.4	2.3903	2.5328	2.47278
										8.5	2.39038	2.53319	2.47352
										8.6	2.39045	2.53356	2.47426
										8.7	2.39053	2.53393	2.47497
										8.8	2.3906	2.53429	2.47567
										8.9	2.39067	2.53464	2.47636
										9	2.39074	2.53499	2.47703
										9.1	2.39081	2.53533	2.47769
										9.2	2.39087	2.53565	2.47833
										9.3	2.39094	2.53598	2.47896
										9.4	2.391	2.53629	2.47958
										9.5	2.39106	2.5366	2.48019
										9.6	2.39112	2.53691	2.48079
										9.7	2.39118	2.5372	2.48137
										9.8	2.39124	2.53749	2.48194
										9.9	2.3913	2.53778	2.4825
										10	2.39135	2.53806	2.48305
										10.1	2.39141	2.53833	2.48359
										10.2	2.39146	2.5386	2.48412
										10.3	2.39151	2.53887	2.48464
										10.4	2.39157	2.53912	2.48516
										10.5	2.39162	2.53938	2.48566
										10.6	2.39166	2.53963	2.48615
										10.7	2.39171	2.53987	2.48664
										10.8	2.39176	2.54011	2.48711
										10.9	2.39181	2.54035	2.48758
										11	2.39185	2.54058	2.48804
										11.1	2.3919	2.54081	2.48849
										11.2	2.39194	2.54103	2.48893
										11.3	2.39199	2.54125	2.48937
										11.4	2.39203	2.54147	2.4898
										11.5	2.39207	2.54168	2.49022
										11.6	2.39211	2.54189	2.49064
										11.7	2.39215	2.54209	2.49105
										11.8	2.39219	2.54229	2.49145
										11.9	2.39223	2.54249	2.49184
										12	2.39227	2.54269	2.49223
										12.1	2.39231	2.54288	2.49262
										12.2	2.39234	2.54307	2.49299
										12.3	2.39238	2.54325	2.49337
										12.4	2.39242	2.54343	2.49373
										12.5	2.39245	2.54361	2.49409
										12.6	2.39249	2.54379	2.49445
										12.7	2.39252	2.54397	2.4948
										12.8	2.39256	2.54414	2.49514
										12.9	2.39259	2.54431	2.49548
										13	2.39262	2.54447	2.49581
										13.1	2.39265	2.54464	2.49614
										13.2	2.39269	2.5448	2.49647
										13.3	2.39272	2.54496	2.49679
										13.4	2.39275	2.54511	2.4971
										13.5	2.39278	2.54527	2.49741
										13.6	2.39281	2.54542	2.49772
										13.7	2.39284	2.54557	2.49802
										13.8	2.39287	2.54572	2.49832
										13.9	2.39289	2.54586	2.49861
										14	2.39292	2.54601	2.4989
										14.1	2.39295	2.54615	2.49919
										14.2	2.39298	2.54629	2.49947
										14.3	2.393	2.54643	2.49975
										14.4	2.39303	2.54656	2.50002
										14.5	2.39306	2.5467	2.50029
										14.6	2.39308	2.54683	2.50056
										14.7	2.39311	2.54696	2.50082
										14.8	2.39313	2.54709	2.50108
										14.9	2.39316	2.54721	2.50134
										15	2.39318	2.54734	2.50159
										15.1	2.39321	2.54746	2.50185
										15.2	2.39323	2.54758	2.50209
										15.3	2.39325	2.54771	2.50234
										15.4	2.39328	2.54782	2.50258
										15.5	2.3933	2.54794	2.50282
										15.6	2.39332	2.54806	2.50305
										15.7	2.39335	2.54817	2.50328
										15.8	2.39337	2.54828	2.50351
										15.9	2.39339	2.5484	2.50374
										16	2.39341	2.54851	2.50396
										16.1	2.39343	2.54862	2.50418
										16.2	2.39345	2.54872	2.5044
										16.3	2.39347	2.54883	2.50462
										16.4	2.39349	2.54893	2.50483
										16.5	2.39351	2.54904	2.50504
										16.6	2.39353	2.54914	2.50525
										16.7	2.39355	2.54924	2.50546
										16.8	2.39357	2.54934	2.50566
										16.9	2.39359	2.54944	2.50586
										17	2.39361	2.54954	2.50606
										17.1	2.39363	2.54963	2.50626
										17.2	2.39365	2.54973	2.50645
										17.3	2.39367	2.54982	2.50665
										17.4	2.39369	2.54992	2.50684
										17.5	2.3937	2.55001	2.50703
										17.6	2.39372	2.5501	2.50721
										17.7	2.39374	2.55019	2.5074
										17.8	2.39376	2.55028	2.50758
										17.9	2.39377	2.55037	2.50776
										18	2.39379	2.55046	2.50794
										18.1	2.39381	2.55054	2.50811
										18.2	2.39382	2.55063	2.50829
										18.3	2.39384	2.55071	2.50846
										18.4	2.39386	2.55079	2.50863
										18.5	2.39387	2.55088	2.5088
										18.6	2.39389	2.55096	2.50897
										18.7	2.3939	2.55104	2.50913
										18.8	2.39392	2.55112	2.5093
										18.9	2.39393	2.5512	2.50946
										19	2.39395	2.55128	2.50962
										19.1	2.39396	2.55135	2.50978
										19.2	2.39398	2.55143	2.50994
										19.3	2.39399	2.55151	2.51009
										19.4	2.39401	2.55158	2.51025
										19.5	2.39402	2.55166	2.5104
										19.6	2.39404	2.55173	2.51055
										19.7	2.39405	2.5518	2.5107
										19.8	2.39406	2.55188	2.51085
										19.9	2.39408	2.55195	2.51099
										20	2.39409	2.55202	2.51114
										20.1	2.39411	2.55209	2.51128
										20.2	2.39412	2.55216	2.51142
										20.3	2.39413	2.55223	2.51157
										20.4	2.39415	2.55229	2.51171
										20.5	2.39416	2.55236	2.51184
										20.6	2.39417	2.55243	2.51198
										20.7	2.39418	2.55249	2.51212
										20.8	2.3942	2.55256	2.51225
										20.9	2.39421	2.55262	2.51238
										21	2.39422	2.55269	2.51252
										21.1	2.39423	2.55275	2.51265
										21.2	2.39425	2.55281	2.51278
										21.3	2.39426	2.55288	2.51291
										21.4	2.39427	2.55294	2.51303
										21.5	2.39428	2.553	2.51316
										21.6	2.39429	2.55306	2.51328
										21.7	2.39431	2.55312	2.51341
										21.8	2.39432	2.55318	2.51353
										21.9	2.39433	2.55324	2.51365
										22	2.39434	2.5533	2.51377
										22.1	2.39435	2.55336	2.51389
										22.2	2.39436	2.55341	2.51401
										22.3	2.39437	2.55347	2.51413
										22.4	2.39438	2.55353	2.51425
										22.5	2.39439	2.55358	2.51436
										22.6	2.39441	2.55364	2.51448
										22.7	2.39442	2.55369	2.51459
										22.8	2.39443	2.55375	2.5147
										22.9	2.39444	2.5538	2.51481
										23	2.39445	2.55385	2.51492
										23.1	2.39446	2.55391	2.51503
										23.2	2.39447	2.55396	2.51514
										23.3	2.39448	2.55401	2.51525
										23.4	2.39449	2.55406	2.51536
										23.5	2.3945	2.55412	2.51546
										23.6	2.39451	2.55417	2.51557
										23.7	2.39452	2.55422	2.51567
										23.8	2.39453	2.55427	2.51578
										23.9	2.39454	2.55432	2.51588
										24	2.39455	2.55437	2.51598
										24.1	2.39456	2.55441	2.51608
										24.2	2.39456	2.55446	2.51618
										24.3	2.39457	2.55451	2.51628
										24.4	2.39458	2.55456	2.51638
										24.5	2.39459	2.55461	2.51648
										24.6	2.3946	2.55465	2.51657
										24.7	2.39461	2.5547	2.51667
										24.8	2.39462	2.55475	2.51677
										24.9	2.39463	2.55479	2.51686
										25	2.39464	2.55484	2.51695

## Sheet: Extended Data Fig. 8b
Microfluidic diffusional sizing raw data										Microfluidic diffusional sizing fitting
																		Dam15
[Dam11]	[Ab]	Fraction bound (repeat 1)	Fraction bound (repeat 2)	Fraction bound (repeat 3)	Average	SD		x	1 uM	2 uM	5 uM		x	1 uM	2 uM	5 uM		x	1 uM	2 uM	5 uM
1	0.1	0	0.0489244	0	0.0163081	0.0230632		1e-07	0.00236232	0.00125132	0.000518989		1e-07	0.212836	0.0116928	0.00846111		1e-07	0.00959175	0.0051482	0.00215355
1	1	0	0.25		0.125	0.125		1.5e-07	0.00354302	0.0018769	0.000778478		1.5e-07	0.251075	0.017515	0.0126826		1.5e-07	0.0143781	0.00772084	0.00323021
1	3	0	0	0.14	0.0466667	0.0659966		2e-07	0.00472339	0.00250244	0.00103796		2e-07	0.281789	0.023321	0.0168979		2e-07	0.019158	0.0102925	0.00430681
1	6	0.174707	0.070824	0.0830946	0.109542	0.0463501		2.5e-07	0.00590345	0.00312794	0.00129745		2.5e-07	0.307733	0.0291105	0.021107		2.5e-07	0.0239315	0.0128632	0.00538333
1	10	0.328916	0.23691	0.31	0.291942	0.0396726		3e-07	0.0070832	0.00375339	0.00155693		3e-07	0.330318	0.0348833	0.0253099		3e-07	0.0286983	0.0154328	0.00645979
1	20	0.72897	0.674288	0.546202	0.64982	0.0765943		3.5e-07	0.00826263	0.00437879	0.0018164		3.5e-07	0.350379	0.0406394	0.0295065		3.5e-07	0.0334585	0.0180015	0.00753617
1	29.32	0.594482	0.548926		0.571704	0.0227779		4e-07	0.00944174	0.00500414	0.00207587		4e-07	0.368459	0.0463786	0.0336967		4e-07	0.0382121	0.0205692	0.00861248
1	32.42	0.684525	0.559011	0.420985	0.554841	0.10763		4.5e-07	0.0106205	0.00562945	0.00233534		4.5e-07	0.384934	0.0521007	0.0378806		4.5e-07	0.0429588	0.0231359	0.00968872
								5e-07	0.011799	0.00625471	0.00259481		5e-07	0.400078	0.0578056	0.0420579		5e-07	0.0476987	0.0257015	0.0107649
2	0.1	0	0	0.0609193	0.0203064	0.0287176		5.5e-07	0.0129771	0.00687992	0.00285427		5.5e-07	0.414095	0.0634931	0.0462288		5.5e-07	0.0524316	0.0282661	0.011841
2	1	0	0	0.0138272	0.00460906	0.0065182		6e-07	0.014155	0.00750509	0.00311373		6e-07	0.427145	0.0691631	0.0503931		6e-07	0.0571576	0.0308297	0.012917
2	3	0	0	0	0	0		6.5e-07	0.0153325	0.00813021	0.00337319		6.5e-07	0.439353	0.0748153	0.0545508		6.5e-07	0.0618765	0.0333922	0.0139929
2	6	0	0.0992321	0.0226165	0.0406162	0.0424637		7e-07	0.0165097	0.00875528	0.00363264		7e-07	0.450822	0.0804497	0.0587018		7e-07	0.0665882	0.0359537	0.0150688
2	10	0.110908	0.115112	0.101982	0.109334	0.00547485		7.5e-07	0.0176865	0.0093803	0.00389209		7.5e-07	0.461635	0.0860661	0.0628461		7.5e-07	0.0712927	0.0385142	0.0161446
2	20	0.266455	0.157446	0.318486	0.247462	0.0671017		8e-07	0.0188631	0.0100053	0.00415154		8e-07	0.471863	0.0916643	0.0669836		8e-07	0.0759899	0.0410735	0.0172204
2	25	0.225872	0.141042	0.21783	0.194915	0.038235		8.5e-07	0.0200393	0.0106302	0.00441098		8.5e-07	0.481562	0.0972442	0.0711143		8.5e-07	0.0806798	0.0436318	0.018296
2	30	0.312007	0.219728	0.502728	0.344821	0.117841		9e-07	0.0212151	0.0112551	0.00467042		9e-07	0.490784	0.102806	0.075238		9e-07	0.0853622	0.0461891	0.0193716
								9.5e-07	0.0223907	0.0118799	0.00492986		9.5e-07	0.499571	0.108348	0.0793548		9.5e-07	0.090037	0.0487452	0.0204471
								1e-06	0.0235659	0.0125047	0.00518929		1e-06	0.507961	0.113872	0.0834646		1e-06	0.0947042	0.0513002	0.0215225
5	1	0	0	0	0	0		1.5e-06	0.0352999	0.0187499	0.00778343		1.5e-06	0.575613	0.168043	0.124163		1.5e-06	0.14094	0.0767891	0.0322727
5	3	0	0	0	0	0		2e-06	0.0469999	0.0249902	0.0103772		2e-06	0.624144	0.22016	0.164094		2e-06	0.186321	0.10216	0.0430152
5	6	0	0	0	0	0		2.5e-06	0.0586651	0.0312256	0.0129707		2.5e-06	0.661385	0.270072	0.203193		2.5e-06	0.230754	0.127405	0.0537497
5	10	0	0.0179343	0	0.0059781	0.00845431		3e-06	0.0702944	0.037456	0.0155638		3e-06	0.69118	0.31764	0.241392		3e-06	0.274138	0.152515	0.064476
5	20	0.134831	0.0940702		0.11445	0.0203802		3.5e-06	0.0818869	0.0436812	0.0181566		3.5e-06	0.715718	0.362744	0.278624		3.5e-06	0.316366	0.177479	0.0751938
5	30	0.200838	0.185053	0.210932	0.198941	0.0106497		4e-06	0.0934415	0.0499012	0.020749		4e-06	0.736365	0.405289	0.314818		4e-06	0.357325	0.202288	0.0859029
								4.5e-06	0.104957	0.0561159	0.0233411		4.5e-06	0.754031	0.445214	0.349903		4.5e-06	0.396898	0.226929	0.0966029
								5e-06	0.116433	0.0623252	0.0259328		5e-06	0.769348	0.482491	0.383812		5e-06	0.434967	0.251389	0.107294
								5.5e-06	0.127867	0.068529	0.0285242		5.5e-06	0.782778	0.517132	0.41648		5.5e-06	0.471421	0.275655	0.117975
[Dam14]	[Ab]	Fraction bound (repeat 1)	Fraction bound (repeat 2)	Fraction bound (repeat 3)	Average	SD		6e-06	0.139259	0.0747272	0.0311152		6e-06	0.794663	0.549187	0.447847		6e-06	0.506155	0.299713	0.128646
								6.5e-06	0.150607	0.0809198	0.0337058		6.5e-06	0.805265	0.578739	0.477863		6.5e-06	0.53908	0.323545	0.139306
1	0.01	0	0	0	0	0		7e-06	0.16191	0.0871066	0.0362961		7e-06	0.814787	0.605898	0.506486		7e-06	0.570124	0.347134	0.149956
1	0.1	0.255326	0.462999	0.495114	0.40448	0.106279		7.5e-06	0.173168	0.0932875	0.038886		7.5e-06	0.823392	0.630798	0.533687		7.5e-06	0.599241	0.370462	0.160595
1	0.3	0.271721	0.28469	0.664915	0.407109	0.182374		8e-06	0.184377	0.0994624	0.0414756		8e-06	0.83121	0.653586	0.559447		8e-06	0.626411	0.393509	0.171223
1	1	0.220196	0.699323	0.367561	0.429027	0.200373		8.5e-06	0.195538	0.105631	0.0440647		8.5e-06	0.838347	0.674417	0.583764		8.5e-06	0.651643	0.416253	0.181839
1	3	0.473469	0.525541	0.954777	0.651262	0.215667		9e-06	0.206649	0.111794	0.0466535		9e-06	0.844889	0.69345	0.606648		9e-06	0.674973	0.43867	0.192442
1	29.32	0.932761			0.932761	0		9.5e-06	0.217708	0.11795	0.0492419		9.5e-06	0.850911	0.71084	0.628124		9.5e-06	0.696463	0.460737	0.203033
								1e-05	0.228715	0.1241	0.05183		1e-05	0.856473	0.726736	0.648228		1e-05	0.716196	0.482428	0.21361
2	0.01	0.0285503	0.0197792	0	0.0161098	0.0119409		1.25e-05	0.282895	0.154749	0.0647643		1.25e-05	0.878957	0.788354	0.730062		1.25e-05	0.792255	0.584266	0.266282
2	0.1	0	0.0231542	0.0354891	0.0195478	0.0147111		1.5e-05	0.335509	0.185219	0.0776886		1.5e-05	0.895281	0.829327	0.786852		1.5e-05	0.840764	0.672471	0.318541
2	1	0.112936	0.146183	0.0603276	0.106482	0.0353461		1.75e-05	0.386333	0.215493	0.0906026		1.75e-05	0.90769	0.857853	0.826516		1.75e-05	0.872655	0.74429	0.370297
2	3	0.265697	0.219132	0.435112	0.306647	0.092806		2e-05	0.435127	0.245551	0.103506		2e-05	0.917452	0.878593	0.854928		2e-05	0.894615	0.799322	0.421435
2	10	0.587535	0.876689	0.754729	0.739651	0.118527		2.25e-05	0.481644	0.275373	0.116398		2.25e-05	0.925335	0.894242	0.875917		2.25e-05	0.910431	0.839792	0.471809
2	29.32	1	0.813452		0.906726	0.0932738		2.5e-05	0.525638	0.304933	0.129278		2.5e-05	0.931838	0.906418	0.891895		2.5e-05	0.922273	0.869158	0.521227
								2.75e-05	0.566883	0.334207	0.142145		2.75e-05	0.937294	0.916138	0.904386		2.75e-05	0.931431	0.890646	0.569442
5	0.1	0.00951418	0	0	0.00317139	0.00448503		3e-05	0.605197	0.363164	0.155001		3e-05	0.941939	0.924064	0.914382		3e-05	0.938703	0.906683	0.616138
5	1	0	0.0662153	0	0.0220718	0.0312142
5	3	0.0105859	0.00226014	0	0.00428203	0.00455204
5	6	0.370157	0.222593	0.0889259	0.227225	0.114859
5	10	0.396389	0.486446	0.433999	0.438945	0.0369318
5	15	0.3139	0.518871	0.344651	0.392474	0.0902536
5	20	0.411634	0.43686	0.598072	0.482189	0.0825864
5	29.32	0.664337	0.665596	0.577177	0.635703	0.0413877
[Dam15]	[Ab]	Fraction bound (repeat 1)	Fraction bound (repeat 2)	Fraction bound (repeat 3)	Average	SD
1	0.1	0	0	0	0	0
1	1	0.0211324	0.352666	0.185205	0.186335	0.13535
1	3	0.0437691	0.431916	0.367996	0.281227	0.169924
1	10	0.843776	0.764369	0.824039	0.810728	0.0337565
1	20	0.933798	0.733384		0.833591	0.100207
1	30	0.719068	1	0.71554	0.811536	0.133272
2	0.1	0	0	0	0	0
2	1	0	0.149522	0	0.0498408	0.0704856
2	3	0.137467	0.173611	0	0.103693	0.0747918
2	6	0.642618	0.644922	0.365635	0.551058	0.131117
2	10	0.586198	0.514986	0.425837	0.509007	0.0656033
2	20	0.77846	0.879399	0.787359	0.815073	0.0456304
2	32.42	0.76729	0.926344	0.895712	0.863115	0.0689031
5	0.1	0.0139375	0	0	0.00464582	0.00657019
5	1	0	0	0.193366	0.0644554	0.0911537
5	3	0.207452	0	0	0.0691507	0.0977939
5	6	0.069363	0.0958239	0	0.0550623	0.0404058
5	10	0.167137	0.179531	0.41221	0.252959	0.112721
5	20	0.499839	0.403499	0.341862	0.415067	0.0650104
5	25	0.161994	0.527961	0.588791	0.426249	0.188499
5	32.42	0.464362	0.650544	0.58	0.564969	0.0767483
