# Supplementary material for: Design of amyloidogenic peptide traps
Source: Nat Chem Biol. 2024 Mar 19;20(8):981–90. doi: 10.1038/s41589-024-01578-5 (PMC11288891; doi:10.1038/s41589-024-01578-5)
Supplement: Supplementary file 18 — Statistical source data. [file 41589_2024_1578_MOESM18_ESM.xlsx]

## Sheet: Extended Data Fig. 9ab
Time /h	2 µM Aβ (control)			+ 0.05 µM Dam_012			+ 0.1 µM Dam_012			+ 1 µM Dam_012			+ 2 µM Dam_012			+ 4 µM Dam_012			+10 µM Dam_012			+ 0.05 µM Dam_014			+ 0.1 µM Dam_014			+ 1 µM Dam_014			+ 2 µM Dam_014			+ 4 µM Dam_014			+10 µM Dam_014				Time /h	2 µM Aβ (control)			+ 0.05 µM Dam_015			+ 0.1 µM Dam_015
0	9351	9398	9296	9394	9060	9515	9596	10829	9366	9570	8843	9086	8599	9386	9347	9289	9090	9178	9350	9607	9483	9010	8958	8841	8831	9291	9111	9148	9020	9276	8929	8939	8821	9080	9200	9085	9088	9410	9163		0	4436	4595	4620	4567	4656	4587	4606	4436
0.0458333	8985	8828	9042	9103	8697	9067	9253	10710	9041	9338	8716	8772	8700	8951	8607	8852	9011	8751	8860	9185	8900	8815	8328	8598	8574	8408	8599	8756	8454	9019	8494	8390	8662	8661	8652	8817	8781	8861	8520		0.0458333	4360	4599	4507	4655	4569	4422	4505	4440
0.0916667	9391	8987	9005	8805	8504	8819	9433	10569	8840	9109	8412	8542	8378	8884	8621	8610	8825	8532	8740	9131	8677	8531	8530	8553	8554	8526	8426	8621	8450	8790	8575	8421	8597	8501	8318	8540	8401	8621	8713		0.0916667	4348	4463	4338	4439	4512	4451	4295	4439
0.1375	8953	9144	9008	8707	8467	8666	9095	10296	8816	8993	8570	8380	8464	8528	8688	8561	8670	8729	8599	8758	8870	8179	8497	8087	8614	8391	8520	8562	8399	8639	8591	8580	8487	8607	8312	8668	8365	8456	8426		0.1375	4290	4395	4398	4496	4487	4600	4383	4452
0.183333	8734	8832	8701	8726	8428	8677	9162	10424	8900	9024	8542	8577	8447	8785	8551	8547	8773	8800	8627	8817	8781	8349	8276	8499	8313	8282	8416	8545	8195	8632	8605	8930	8351	8588	8618	8743	8502	8712	8252		0.183333	4163	4301	4238	4506	4407	4425	4168	4264
0.229166	8698	8654	8764	8483	8492	8709	9020	10328	9074	8962	8170	8310	8193	8640	8697	8582	8607	8309	8626	8651	8616	8533	8072	8270	8200	8429	8494	8622	8396	8746	8411	8613	8371	8356	8376	8715	8359	8930	8331		0.229166	4114	4276	4226	4465	4441	4361	4239	4274
0.275	8863	8915	8996	8633	8515	8656	8956	10547	8895	9190	8551	8592	8351	8742	8532	8505	8649	8353	8392	8797	8652	8124	8353	8205	8216	8139	8600	8424	8420	8621	8566	8751	8596	8357	8222	8606	8322	8594	8292		0.275	4220	4466	4355	4455	4529	4368	4285	4204
0.320833	8962	8715	8876	8531	8146	8754	8949	10378	8849	9037	8326	8442	8289	8948	8627	8320	8518	8322	8470	8826	8652	8213	8183	8272	8145	8211	8397	8525	8379	8726	8532	8585	8200	8321	8378	8773	8285	8853	8543		0.320833	4115	4418	4206	4401	4379	4386	4292	4315
0.366666	8743	8584	8757	8782	8428	8602	9101	10320	8624	8951	8368	8299	8552	8429	8600	8318	8390	8438	8482	8520	8484	8143	8234	7970	8067	8203	8246	8221	8266	8894	8435	8607	8468	8343	8358	8433	8511	8523	8346		0.366666	4372	4351	4292	4464	4407	4339	4224	4167
0.4125	8760	8945	8938	8607	8384	8387	9064	10122	8645	8925	8172	8304	8441	8483	8421	8307	8565	8537	8414	8844	8577	8267	8210	7993	7975	7999	8145	8324	8211	8803	8376	8714	8310	8226	8572	8578	8317	8700	8368		0.4125	4044	4386	4481	4520	4485	4403	4266	4216
0.458333	9141	9088	9106	8264	8324	8513	8830	10085	8668	8757	8200	8312	8347	8606	8579	8352	8534	8427	8303	8615	8453	8257	7987	8281	7970	8116	8135	8477	8281	8649	8487	8598	8474	8392	8561	8520	8140	8488	8391		0.458333	4136	4187	4287	4261	4450	4568	4352	4270
0.504166	9317	9474	9735	8315	8172	8552	8831	10325	8696	8743	8114	8406	8516	8589	8377	8239	8410	8356	8453	8712	8211	8237	8008	8173	8022	8313	8367	8166	8343	8805	8308	8904	8443	8211	8593	8593	8141	8547	8186		0.504166	4208	4403	4356	4346	4402	4396	4152	4215
0.55	10285	10207	10899	8688	8376	8460	8900	10033	8504	8775	8371	8344	8568	8373	8562	8198	8566	8169	8249	8512	8516	8127	8188	7822	7977	7984	8126	8313	8356	8600	8300	8612	8367	8367	8657	8452	8452	8435	8337		0.55	4343	4530	4510	4459	4412	4361	4242	4208
0.595833	11426	11568	12073	8584	8360	8480	8812	10253	8523	8822	8317	8367	8396	8305	8518	8533	8330	8271	8126	8628	8236	8131	8106	8226	8022	7977	8263	8226	7942	8891	8371	8590	8215	8321	8511	8545	8474	8719	7992		0.595833	4681	4818	4733	4486	4360	4591	4346	4142
0.641666	13275	13731	14353	8337	8303	8393	8779	10204	8490	8651	8236	8022	8586	8590	8403	8207	8251	8314	8268	8471	8276	8376	8049	8037	7805	8166	8113	8056	8225	8478	8148	8776	8176	8242	8594	8652	8205	8791	8280		0.641666	5076	5012	5004	4614	4772	4850	4338	4312
0.6875	15986	16881	17451	8598	8080	8792	8865	10025	8694	8629	8059	8088	8302	8263	8252	8102	8358	8410	8290	8634	8547	8279	8100	8034	7624	7967	8129	8022	8253	8671	8190	8664	8299	8090	8663	8641	8343	8654	8162		0.6875	5998	5535	5481	4693	4759	5129	4453	4376
0.733333	19791	21382	21990	8248	8304	8755	8716	10213	8564	8698	8218	8101	8284	8618	8312	8179	8468	8327	8426	8720	8515	8312	7980	8074	7756	8095	8183	8262	8126	8600	8335	8589	8138	8239	8479	8487	8249	8626	8219		0.733333	6861	6511	6446	5031	5029	5466	4520	4589
0.779166	24220	26232	26741	8517	8390	8484	8677	10201	8878	8772	8120	8150	8256	8490	8477	8344	8197	7953	8203	8379	8566	8999	8142	8099	7752	7745	7993	8374	7832	8708	8092	8678	8308	8262	8500	8576	8138	8404	8297		0.779166	7767	7491	7460	5174	5390	6031	4796	4483
0.824999	29004	31499	32271	8550	8755	9182	9054	10245	8573	8909	8022	8149	8299	8403	8481	8275	8293	8375	8150	8406	8660	9395	8268	8396	7738	8232	8103	8345	7944	8450	8322	8532	8306	8301	8462	8306	8340	8845	8240		0.824999	8768	8478	8734	5602	5663	6587	5029	4736
0.870833	33891	36977	37728	8903	8790	9430	9255	10228	8602	8590	8031	8222	8213	8339	8362	8293	8359	8403	8233	8467	8381	9628	8434	8265	8251	8049	8174	8300	8103	8949	8057	8694	8199	8039	8535	8589	8090	8567	8180		0.870833	9328	9354	9672	6166	6290	7523	5255	5224
0.916666	38993	42190	41822	8959	8795	9764	9161	10610	8879	8790	8139	8122	8244	8470	8354	8128	8131	8452	8025	8539	8472	10154	8601	8420	8006	8060	8037	7976	8105	8767	8079	8777	8402	8084	8663	8333	7874	8652	8021		0.916666	10196	10234	10222	6879	6923	8260	5650	5317
0.962499	42672	45126	45799	9271	9146	10543	9313	10665	8911	9011	8153	8224	8289	8371	8215	8272	8209	8340	8448	8404	8216	10772	8887	8677	8051	7936	8016	8160	8272	8537	8064	8813	8129	8018	8331	8547	8007	8520	8284		0.962499	10743	10731	10541	7383	7464	8924	6334	5967
1.00833	47014	48231	48611	9560	10043	10989	9274	10704	9060	8761	7959	8157	8243	8453	8246	7981	8056	8241	8179	8522	8420	11250	9388	9391	8196	7871	7934	8154	8132	8685	8587	8592	8074	8087	8454	8516	7850	8396	8375		1.00833	10974	11072	11191	8320	8153	9376	6673	6232
1.05417	48435	50037	50649	10339	10480	12309	9832	10649	8857	8724	8007	7944	8591	8367	8176	8305	8166	8088	8172	8462	8392	11845	10307	9832	8296	8059	8039	8227	7999	8584	8301	8339	8147	8151	8349	8455	7728	8568	8330		1.05417	11497	11376	11496	9107	8976	10012	7327	6889
1.1	50813	52618	52510	10724	11331	12592	10042	10888	9248	8775	7984	8060	8407	8717	8459	8280	8411	7981	8178	8357	8250	12939	10881	10415	8342	8235	8239	8151	7873	8737	8300	8539	8103	8331	8292	8450	8047	8526	7987		1.1	11956	11597	11642	9786	9660	10101	7658	7665
1.14583	53152	54243	53716	12068	12240	14036	10075	11258	9223	8736	7974	8196	8418	8351	8298	8206	8243	8288	8019	8431	8292	13420	11348	10802	8605	8262	8507	8112	8116	8442	8075	8653	8421	8199	8482	8285	8160	8520	8111		1.14583	11988	11754	12194	10446	10078	10393	8406	7977
1.19167	53951	55152	54756	12528	13086	15305	10867	11868	9281	8756	8069	8265	8519	8477	8337	8043	8477	8210	8162	8516	8236	14363	12204	11578	8875	8307	8946	8135	7942	8755	8326	8579	8333	8216	8202	8297	8101	8468	7972		1.19167	12300	12027	12009	11139	10632	10554	9019	8569
1.2375	54140	55473	55927	13409	14330	16336	11320	12137	9837	8774	8125	8104	8268	8432	8300	8350	8319	8357	8078	8424	8402	14845	12975	12266	9355	8427	8961	8182	8061	8689	8173	8713	8249	8247	8389	8635	8039	8536	8310		1.2375	11735	11853	11918	11103	10599	10732	9144	9008
1.28333	55128	56530	56738	14385	15548	16971	11691	12780	10272	8369	8004	8166	8509	8306	8529	8468	8566	7943	8361	8417	8469	15434	13702	12655	9693	8655	9222	8173	7910	9066	8244	8748	8438	8343	8587	8706	7987	8619	7984		1.28333	12338	12064	12053	11267	10744	10870	9432	9631
1.32917	55004	56985	56774	15747	16203	17972	12672	13421	10355	8485	8081	8074	8376	8491	8518	8057	8289	8254	8200	8340	8183	16261	14462	13660	9968	8990	9386	8044	8003	8622	8420	8456	8187	8073	8510	8520	8102	8753	8171		1.32917	12407	12160	11976	11687	11066	11574	9848	9992
1.375	56093	56684	56238	16615	17554	18861	12998	14047	10859	8591	8029	7870	8406	8632	8507	8287	8421	8368	8008	8451	8428	16842	15479	14319	10369	9310	9874	8360	8174	8578	8304	8770	8226	8168	8742	8584	8105	8537	8146		1.375	12231	12074	12061	11834	11353	11136	10310	10144
1.42083	56522	57306	56572	17803	18506	19855	13843	14604	11503	8570	8056	8026	8199	8476	8779	8123	8402	8217	8312	8440	8188	16943	16333	15064	10406	9515	10098	8035	8087	8526	8437	8736	8351	8274	8527	8733	8108	8532	8016		1.42083	12213	12375	12187	12305	11295	11132	10382	10173
1.46667	56939	57289	56351	18324	19537	20083	14367	15401	11956	8568	8138	7986	8618	8258	8596	8074	8265	8276	8194	8633	8529	17022	17034	15370	11298	9893	10443	8366	8049	8749	8332	8987	8335	8293	8528	8624	8349	8586	7941		1.46667	12246	12298	12206	12263	11276	10988	10624	10238
1.5125	57232	57013	57183	19512	20166	20783	15390	16136	12403	8415	8184	8179	8518	8410	8467	8015	8283	8272	8150	8571	8365	17423	17164	15916	11619	10474	11015	8250	8273	8807	8143	8427	8257	8026	8469	8600	8304	8763	8198		1.5125	12216	12323	12172	12078	11313	11280	10448	10394
1.55833	57137	57073	56468	20588	21045	21640	16092	16951	13555	8448	8032	7944	8383	8571	8299	8150	8296	8510	8157	8712	8279	17664	17532	16252	11440	10647	11319	8069	8061	8540	8270	8563	8187	8219	8496	8730	8180	8563	8022		1.55833	12460	12524	11926	12043	12074	11195	10629	10345
1.60417	56470	56703	56116	21727	21863	22027	16813	17694	13999	8816	8091	7990	8267	8594	8452	8421	8115	8270	8251	8732	8191	17861	17926	16530	12009	11544	11878	8127	8105	8624	8228	8653	8458	8096	8531	8536	8247	8562	7881		1.60417	12657	12091	12194	12216	11648	11186	10851	10162
1.65	56308	56049	56577	21918	22321	22423	17522	18418	14617	8733	7894	8070	8481	8744	8530	8459	8240	8265	8334	8381	8298	17415	17931	16965	12684	11668	12326	8119	7950	8716	8422	8901	8212	7963	8518	8754	8195	8580	7947		1.65	12347	12394	12128	12189	11874	11238	10874	10615
1.69583	56571	56069	56408	22821	22651	22282	18366	18644	15138	8788	8056	8027	8471	8548	8473	8069	8353	8379	8321	8273	8438	17822	18235	17336	12973	11947	12842	8230	8056	8796	8277	8699	8329	8247	8550	8740	8176	8654	8157		1.69583	12722	12224	12283	12234	11637	11242	10827	10661
1.74167	56242	55498	56377	23536	22878	22380	19201	19774	15879	8521	8120	8211	8366	8581	8475	8168	8294	8296	8116	8615	8671	18128	18546	17217	13588	12704	13206	8182	8080	8857	8334	8497	8398	8311	8461	8646	8259	8628	8015		1.74167	12456	12083	12006	12448	11805	11126	10943	10451
1.7875	56466	55894	55850	23748	22807	22028	19834	20766	16403	8462	7891	8179	8514	8756	8419	8142	8176	8451	8079	8707	8317	18229	18428	17515	13814	13523	13628	8101	8170	8788	8149	8673	7934	8071	8494	8472	8215	8705	8269		1.7875	12400	12212	12043	12418	11710	11128	10755	10692
1.83333	56448	55777	56191	24402	23066	22461	20226	20733	17391	8837	8376	8211	8268	8294	8550	8188	8336	8339	8065	8446	8262	18408	18868	17435	13904	13457	14364	8313	8020	8921	8243	8253	7996	8222	8524	8413	7967	8472	8158		1.83333	12662	12272	12187	12301	11749	11385	10974	10801
1.87917	55372	56766	55401	24763	23597	22845	20248	21894	18036	8745	8095	7934	8238	8432	8359	8301	8353	8324	8192	8415	8458	18305	18726	17685	13823	14153	14633	7975	8088	8863	8076	8373	8153	8172	8415	8565	8232	8650	8003		1.87917	12672	12329	12202	12181	11767	10977	10972	10743
1.925	56285	55271	55786	24683	23376	22825	20759	22263	18818	8615	8223	8089	8245	8571	8456	8135	8316	8193	8058	8341	8399	18242	18647	17680	14550	14255	14783	7936	7993	8695	8257	8726	8278	8231	8671	8568	8203	8414	8254		1.925	12663	12673	12258	12323	12054	11342	11058	10816
1.97083	54163	55646	55750	25308	23457	22610	20875	22257	19428	8480	8135	8026	8378	8533	8321	8102	8227	8292	8299	8604	8317	18173	18689	18260	14625	14708	15058	8346	8112	8796	8049	8576	8210	8275	8665	8589	8113	8703	8220		1.97083	12740	12183	11994	12122	12044	11319	10682	10674
2.01667	54999	55504	55449	25313	23221	22507	20926	22677	19176	8619	8275	8172	8535	8400	8407	7808	8259	8116	8241	8492	8280	18274	18902	17907	14729	15164	15177	8265	8041	8701	8212	8580	8160	8071	8569	8740	8069	8769	8332		2.01667	12641	12547	12071	12383	11646	11633	11186	11171
2.0625	54572	55704	55784	25549	23029	22078	21237	23221	19675	8538	7923	8140	8394	8558	8412	8099	8295	7890	8189	8302	8323	18208	18199	17778	14511	15418	15341	8167	8057	8815	8324	8824	8225	7989	8504	8492	7877	8594	8226		2.0625	12858	12678	11861	12280	12021	11408	11068	10717
2.10833	54944	55556	55624	25474	23084	22424	21449	23271	20374	8487	8060	8176	8254	8298	8338	8133	8204	8363	8093	8594	8325	18398	18697	17984	14809	15556	15476	8191	8040	8584	8218	8648	8380	8315	8478	8569	8087	8458	8093		2.10833	12798	12570	12161	12504	11741	11326	11172	10641
2.15417	54678	55968	55678	25289	23350	22334	21081	23371	20732	8438	8202	8220	8479	8441	8453	8268	8362	8231	8256	8731	8397	18366	18382	17899	14912	15587	15337	8319	8005	8817	8201	8480	8150	8053	8542	8594	8225	8893	8128		2.15417	12613	12617	12156	12561	11814	11432	10998	10660
2.2	54480	55207	56526	25329	23077	22094	21115	23306	21101	8429	7985	7890	8453	8517	8433	7984	8320	8291	7938	8466	8447	18447	18147	17531	14940	15456	15530	8022	7979	8766	7989	8601	8171	8370	8467	8630	8112	8874	8166		2.2	12511	12530	11979	12466	12049	11002	11118	10712
2.24583	54710	55178	56471	25292	22956	21875	21504	23898	21262	8757	8120	7943	8390	8318	8477	8140	8230	8278	8316	8801	8441	18099	18591	17568	14793	15996	15899	8189	8040	8958	8096	8802	8277	8265	8713	8529	8144	8794	8252		2.24583	12797	12664	12015	12366	12200	11485	11131	10937
2.29167	53710	55469	56409	25359	23037	21937	21162	23734	21547	8608	8119	8003	8469	8412	8347	8160	8559	8520	8346	8455	8318	18422	18390	17624	15490	15891	15731	8402	8039	8859	8119	8653	8479	8070	8603	8634	8064	8590	8383		2.29167	12487	12436	11969	12084	11955	11485	10768	10453
2.3375	53940	55925	55752	24658	22679	21819	21510	24000	21492	8674	8213	7870	8365	8528	8299	8329	8084	8158	8304	8569	8402	18227	18503	17095	15217	15863	15977	8182	7844	8845	8195	8630	8031	8211	8605	8873	7976	8599	8160		2.3375	12834	12591	12286	12454	11737	10996	11287	10728
2.38333	54281	55685	56050	25310	22661	22054	21356	24203	21928	8522	8072	8249	8488	8698	8261	8171	8374	8477	8428	8540	8356	18820	18221	17248	15141	16060	16015	8181	8109	8428	8063	8773	8290	8013	8475	8765	8084	8604	8043		2.38333	12560	12455	11960	12444	11867	11572	11078	10597
2.42916	54057	55540	56179	24709	22235	22041	21527	24312	21931	8704	8152	8051	8251	8554	8606	7918	8496	8076	8351	8349	8432	18489	18159	17305	15370	16262	15927	7990	8250	8648	8248	8628	8193	8167	8476	8489	7965	8547	8365		2.42916	12445	12824	11884	12171	11673	11220	11004	10931
2.475	54546	55991	56799	24072	22769	22023	21170	24754	21756	8775	8004	8188	8279	8383	8505	8157	8492	8316	8208	8578	8473	18130	17915	17682	15027	16109	15903	8168	7910	8872	8202	8676	8206	8318	8511	8505	8186	8595	8134		2.475	12575	12443	12002	12286	11580	11274	10975	10828
2.52083	53770	55899	56212	24397	21813	21648	21450	24032	21889	8779	7810	8260	8430	8417	8428	8391	8469	8323	8341	8586	8303	18284	17604	17127	15044	16142	16351	8164	8015	8740	8250	8493	8442	8073	8707	8809	8130	8643	8026		2.52083	12806	12846	11817	12178	11434	11080	11047	10785
2.56666	53708	56239	56748	24528	21949	21541	21003	23835	22008	8484	7986	8108	8330	8474	8400	8089	8229	8301	8087	8351	8406	18235	17972	17222	15225	16020	15672	7977	8063	8834	8244	8775	8371	8199	8551	8873	8387	8660	8093		2.56666	12703	12675	12089	12210	11726	11299	10928	10606
2.6125	54207	56924	56987	24509	21833	21313	21111	23476	21912	8550	7985	7902	8324	8472	8342	8062	8451	8266	8344	8406	8383	18122	17769	16934	15396	16088	16031	7928	8066	8806	8212	8547	8325	8229	8708	8582	8180	8452	8174		2.6125	12635	12651	12144	12351	11376	11354	11039	10665
2.65833	54107	56489	56608	24229	21877	21239	21117	23831	21794	8714	8113	8153	8310	8336	8252	8332	8334	8345	8101	8423	8236	18243	17794	16777	14892	15897	15751	7987	8119	8702	8095	8594	8189	8208	8713	8466	7960	8568	7964		2.65833	12625	12583	12045	12279	11848	11441	10927	10513
2.70416	54063	56369	57417	23870	22055	21834	20893	23883	21708	8605	8082	8011	8360	8324	8501	8113	8120	8271	7966	8514	8266	18151	17576	17096	15312	16244	15791	7853	7899	8843	8111	8472	8258	8381	8671	8806	8077	8621	8035		2.70416	12505	12822	12036	12444	11476	11472	10837	10650
2.75	54325	56730	57120	23838	21545	21475	20973	24041	21782	8571	8251	7917	8256	8667	8544	8228	8354	8273	8223	8347	8329	17986	18101	17180	15322	16296	16238	8236	8027	8616	8052	8519	8007	8249	8441	8672	8155	8625	8148		2.75	12569	12982	12351	11850	11491	11526	10560	10422
2.79583	53768	56498	57505	23670	21628	21212	21066	23620	21623	8610	8090	8041	8263	8414	8251	8222	8160	8207	8234	8451	8255	18017	17833	16882	15500	16260	16291	8152	8205	8608	8036	8835	8288	8228	8576	8624	8318	8671	8014		2.79583	12472	12846	12082	12024	11122	11528	10932	10777
2.84166	53918	56540	58147	23509	21336	21014	20901	23577	21965	8530	7866	8172	8464	8595	8159	8456	8349	8329	8582	8328	8312	17997	17501	16988	15299	16159	16310	7826	7946	8660	8046	8620	8292	8159	8985	8708	8198	8724	8163		2.84166	12437	13216	12303	11835	11330	11285	10780	10262
2.8875	53517	57312	57159	23065	21373	21232	20895	23580	21521	8724	8153	8197	8355	8370	8350	8230	8146	8429	8402	8441	8322	17879	17985	17040	15473	15960	16197	8036	8076	8548	8143	8472	7974	8386	8522	8472	8069	8615	8132		2.8875	12415	13011	12219	11859	11154	11532	10714	10212
2.93333	53509	56799	57309	23621	21180	20846	20824	23434	21681	8184	8310	8042	8334	8466	8360	8022	8282	8110	8441	8293	8565	18044	17318	16678	14944	15895	15970	8205	8069	8479	8121	8502	8219	8071	8510	8605	8185	8685	8081		2.93333	12538	13169	11990	11603	10886	11144	10677	10221
2.97916	54084	57459	57385	23253	21185	20844	20997	23408	21646	8763	8097	8148	8323	8457	8253	8193	8284	8260	8300	8162	8381	18242	17416	16944	15283	15909	15497	8033	7890	8577	8093	8826	8050	8197	8449	8651	8180	8411	8247		2.97916	12546	12956	12326	12055	10794	11195	10602	10412
3.025	53471	56940	57465	22587	20871	21045	20898	23452	21370	8731	8022	8052	8172	8296	8146	8264	8221	8203	8153	8508	8107	18039	17561	16780	15456	15980	15553	8118	7888	8784	8052	8634	8225	8406	8401	8496	8136	8563	7946		3.025	12217	12908	12412	11858	11102	11557	10705	10356
3.07083	54438	57692	57578	23004	20593	21097	20900	22897	21534	8770	8091	7919	8421	8309	8248	8152	8242	8159	8176	8221	8178	18035	17483	16849	14879	15817	16058	8080	7983	8733	8114	8534	8139	8283	8401	8675	8137	8447	8084		3.07083	12519	12969	12388	11620	10764	11380	10486	10305
3.11666	54595	57190	57635	22894	20672	21144	20828	23348	21538	8694	7961	7719	8376	8416	8316	8157	8138	8218	8193	8568	8297	18055	17667	16965	15067	16234	15791	8141	8030	8824	8167	8471	8096	8291	8700	8628	8292	8604	7778		3.11666	12540	13223	12046	11629	10921	11227	10721	10554
3.1625	54339	57157	57272	22715	20234	21046	20489	22985	21629	8542	8100	8016	8291	8245	8108	8224	8128	8384	8501	8589	8284	18091	17822	16667	15057	15962	15740	8182	8010	8824	8133	8445	8335	8093	8464	8817	8188	8613	8027		3.1625	12306	12982	12133	11315	10755	11308	10471	10440
3.20833	54092	56793	58450	22641	20707	21239	20522	23073	21118	8667	8165	7858	8342	8451	8249	8325	8242	8452	8244	8505	8023	18084	17825	16892	15190	15815	16050	8084	8196	8727	8201	8501	7982	8253	8548	8634	8259	8676	8039		3.20833	12600	13163	12310	11374	10424	11528	10530	10374
3.25416	54252	57413	57223	22296	20773	20996	20616	22672	21361	8390	8132	8122	8383	8427	8149	8061	8278	8209	8397	8391	8344	18602	17705	16920	14776	15693	15772	7993	7820	8737	8011	8797	8192	8293	8574	8646	8139	8607	8107		3.25416	12407	13065	12454	11347	10638	11345	10535	10519
3.3	53392	57087	57989	22396	20324	20802	20566	22591	21309	8675	8337	7929	8024	8247	8185	8091	8164	8422	8287	8466	8459	18114	17736	16880	14844	15648	15992	7956	8129	8747	8143	8537	8053	8178	8680	8674	8226	8425	8154		3.3	12735	12969	12368	11396	10707	11502	10706	10316
3.34583	53777	57568	58028	22523	20741	21105	20288	23008	21116	8627	8131	8072	8236	8298	8309	8072	8278	8216	8218	8274	8286	18031	17487	16793	14761	15949	15780	7987	8029	8641	7963	8342	8292	8185	8518	8733	8197	8571	7982		3.34583	12804	13267	12475	11192	10680	11763	10453	10224
3.39166	53254	57155	58748	22646	20099	20985	20647	23137	20948	8574	8239	8133	8392	8109	8328	8021	7921	8066	8373	8499	8473	18363	17495	16534	14862	15613	15580	7975	8006	8779	8191	8720	7881	8156	8568	8431	8365	8779	7909		3.39166	12405	13014	12386	11610	10423	11425	10319	10296
3.4375	53950	57551	57822	22627	20750	20654	20494	22789	20787	8711	8201	8029	8294	8069	8252	7966	8272	8317	8048	8580	8223	18268	17745	16882	15166	15784	15484	8138	7940	8664	8039	8379	8110	8156	8320	8449	8212	8610	8050		3.4375	12720	13449	12334	11250	10498	11582	10284	10251
3.48333	53541	57935	58089	22732	20076	20219	20458	22822	21044	8630	8243	8095	8066	8228	8284	7981	8179	8293	8295	8255	8436	18434	17398	16858	14910	15573	15555	8036	7791	8705	7882	8525	7880	8213	8356	8497	7904	8721	8127		3.48333	12923	12762	12567	11208	10573	11248	10663	10192
3.52916	54262	58148	57894	22238	20139	20528	20324	22714	20409	8567	7964	8159	8317	8319	8220	8197	8224	8452	8155	8326	8322	18190	17808	16664	14772	15608	15715	7868	8003	8751	7992	8653	8091	8189	8460	8662	7971	8697	8203		3.52916	12731	13316	12365	11259	10726	11429	10366	10186
3.575	53433	58546	58140	22238	19834	20898	20387	22938	20882	8339	8264	7951	8322	8315	8254	7838	8318	8285	8308	8653	8389	18551	18078	16949	14806	15688	15679	7991	7916	8647	7978	8602	8303	7805	8602	8590	8110	8447	8126		3.575	12842	13300	12730	11167	10643	11478	10352	9878
3.62083	54783	58466	58583	22674	19453	20599	20204	22748	20686	8696	7997	8081	8227	8270	8165	7914	7993	8141	8264	8661	8240	18282	17790	16751	15166	15574	15626	8188	7886	8627	8150	8873	8034	7996	8566	8588	8356	8575	8051		3.62083	12935	13256	12759	11266	10417	11220	10413	10047
3.66666	54675	58139	58644	22598	19711	20796	20325	22830	20845	8507	8099	7959	7959	8322	8209	7910	8023	8059	8224	8437	8248	18333	17786	16885	15001	15670	15713	8022	8022	8457	8041	8567	7960	7947	8258	8638	8230	8499	8218		3.66666	13008	13124	12449	11089	10353	11083	10431	10078
3.7125	54143	58326	58842	22377	20052	20668	20613	22630	20395	8746	8057	7902	8246	8145	8304	7955	8322	8031	8106	8186	8127	18549	17485	16767	15278	15896	15519	8051	8102	8632	8070	8507	7984	8061	8584	8735	8201	8773	7814		3.7125	12868	13405	12773	11165	10304	11493	10545	9969
3.75833	53721	59363	58914	22877	20179	20531	20065	22889	20592	8750	8035	7933	8265	8363	8371	7902	8268	8055	8279	8454	8236	18488	17579	17244	14660	15645	15651	7988	7920	8533	7933	8583	8161	8079	8742	8731	8291	8513	8132		3.75833	13207	13542	12763	11051	10727	11648	10432	10167
3.80416	54078	59001	58472	22194	20664	20929	20428	22570	20422	8258	8257	7931	8241	8180	8235	8058	8053	8251	8340	8415	8256	18443	17876	16607	14876	15589	15540	7826	7938	8644	8050	8556	8064	8101	8532	8345	7897	8732	8285		3.80416	12864	13494	12675	11285	10381	11450	10406	10257
3.85	53955	58176	59525	22291	20711	21352	20500	22834	20297	8614	8134	8090	8191	8326	8290	7932	8252	8244	8020	8466	8216	18128	17944	16728	14936	15237	15570	7968	7909	8570	7973	8554	8042	8161	8729	8659	8067	8329	7914		3.85	13111	13578	12354	10800	10285	11623	10170	9927
3.89583	54216	57938	58797	22388	21527	21371	20400	22761	20800	8610	8071	8174	8018	8319	8140	8099	8209	8141	8280	8536	8148	18366	18047	16595	14962	15285	15631	7885	7874	8737	8137	8449	7979	8194	8526	8472	8059	8642	8168		3.89583	13185	13517	12907	10850	10105	11635	10058	9970
3.94166	53333	58289	58777	21894	20777	21269	20191	22685	20424	8432	8058	8038	8381	8243	8265	8051	8179	8269	8175	8282	8055	18794	17621	16599	15107	15457	15440	7848	7694	8536	8045	8686	8059	8146	8518	8345	8084	8510	8140		3.94166	13152	13256	12616	11027	10487	11623	10157	10022
3.9875	53704	59264	59589	21996	21238	20775	19809	22653	20378	8369	8123	8068	8095	8177	8112	8124	8326	7992	8115	8544	8409	18708	17782	16279	15116	15360	15675	8144	7975	8879	7819	8513	7773	8238	8472	8439	8132	8444	8278		3.9875	13054	13530	12828	11043	10116	11560	10355	10021
4.03333	53959	58755	59849	22377	20578	20977	20114	22958	20324	8673	7996	8024	8190	8292	8115	7709	8249	7851	8058	8201	7972	18477	17690	16790	15002	15490	15309	7823	7870	8673	7764	8383	7859	8100	8649	8565	8078	8487	8049		4.03333	13018	13506	12673	11133	10259	11456	10270	10249
4.07916	53821	59823	59584	22102	20309	21297	19827	22807	20455	8473	8018	7758	8189	8270	8225	7937	8155	8015	8242	8405	8341	18537	17864	16731	14850	15279	15493	8333	7754	8714	7963	8419	8005	8003	8578	8346	8027	8365	7981		4.07916	13081	13606	12995	10920	10230	11649	10497	10121
4.125	54679	58448	59082	22323	21475	20978	19826	22561	20622	8509	8120	8078	8054	8387	8085	8034	8237	8182	8079	8459	8186	18798	17984	16686	15178	15448	15715	8056	7870	8566	7971	8312	7981	7884	8636	8694	7969	8502	8045		4.125	13367	13435	13146	10684	10357	11586	10342	10136
4.17083	54611	59105	60438	22320	21445	21311	20413	23066	20937	8677	7977	7883	8202	8303	8041	8028	8069	8027	7951	8615	8243	18376	18066	16707	14976	15356	15763	7903	7945	8804	8166	8376	8221	8172	8495	8475	8141	8412	7914		4.17083	13500	13471	12820	10761	10168	11428	10464	10236
4.21666	54447	59468	60122	22604	21601	20961	19854	23204	20049	8340	8004	7837	8233	8357	8136	8015	8200	8119	8132	8518	8142	18791	17915	16497	14842	15736	15411	8099	8093	8856	7807	8554	8053	8035	8231	8355	7989	8425	8120		4.21666	13604	13658	12820	10836	10248	11560	10338	10103
4.2625	54258	59047	60124	22467	22586	21133	20353	22792	20389	8535	8102	8160	8251	8086	8312	8059	8083	8219	8120	8217	8330	18489	17968	16675	15233	15485	15459	7927	7789	8502	7853	8473	7921	8002	8419	8625	7909	8298	8039		4.2625	13334	13699	12730	10797	10046	11508	10099	9910
4.30833	54444	59385	59797	22483	21938	21388	20705	22499	19818	8508	8003	7866	8279	8253	8069	7834	8109	8086	8253	8396	8237	18639	17960	16627	15328	15452	15654	7878	7940	8469	8034	8472	7856	7991	8569	8458	8101	8684	8114		4.30833	13578	13431	12651	10870	10108	11737	10295	10043
4.35416	54392	59340	60554	22466	21921	21238	20377	22770	20546	8467	7987	7845	7956	8085	8148	7842	8152	8353	8311	8342	8171	18999	18223	16503	14978	15110	15370	7893	8014	8478	7899	8373	8100	8107	8479	8349	8320	8412	8021		4.35416	13302	13780	12815	10799	10358	11540	10308	9992
4.4	55125	59532	60527	22332	21808	21536	19402	22771	20767	8669	8273	7934	8105	8229	8031	7831	8307	7998	8213	8229	8288	18614	18046	16752	14630	15309	15201	7907	7784	8428	7961	8649	8114	7857	8491	8287	7982	8549	8221		4.4	13391	13893	12912	10735	10182	11470	10325	10129
4.44583	53677	59735	59986	22502	22070	21861	19912	23122	21505	8519	8061	8062	8063	8053	8039	7699	7915	7942	8232	8211	8445	18499	17784	16641	14836	15638	15798	8077	7803	8839	7937	8442	7915	8088	8383	8453	7888	8681	7896		4.44583	13524	13984	13116	10789	10131	11588	10277	10058
4.49166	54732	59570	60392	22536	21512	21698	20242	22446	22604	8598	8082	7973	8134	8283	8156	7804	8080	8243	8145	8290	8264	18535	17830	16661	15380	15556	15685	8020	7934	8532	7934	8299	8032	8032	8451	8487	7900	8441	8016		4.49166	13552	13780	13001	10666	9983	11510	10567	10156
4.5375	54355	59955	60526	23278	21823	21972	20541	22107	21058	8484	8108	8033	8017	8099	8180	8020	8085	7919	7939	8410	8245	18962	18049	16914	15160	15622	15258	7835	8049	8580	7902	8171	7914	8122	8302	8584	7914	8451	8085		4.5375	13928	14008	13030	10787	10077	11612	10779	10461
4.58333	53987	59693	60003	22707	22193	20919	19941	23250	20579	8505	8041	8211	8310	8102	8190	7870	8178	8103	8190	8095	8134	18688	17918	16638	14921	15611	15306	7996	8015	8507	8075	8489	7885	7937	8496	8369	8014	8607	8016		4.58333	13585	13857	13154	10565	10206	11269	10665	10228
4.62916	53911	60353	60263	23125	22144	21172	19741	23311	21605	8392	8019	8367	8124	8082	8102	7983	8077	8134	8157	8466	8199	18525	17700	16701	15231	15498	15434	8194	7991	8586	7881	8659	7845	7990	8292	8427	7870	8418	8063		4.62916	13870	13953	13119	10620	9908	11489	10483	10337
4.675	54757	60234	60044	22883	22908	21624	20002	23174	20978	8559	8178	7974	8106	7830	8196	7847	8080	8022	8358	8243	8306	18583	17637	16917	15201	15573	15563	8035	7999	8210	7849	8465	7879	7979	8513	8559	7765	8347	8097		4.675	13690	14200	13043	10807	10021	11857	10728	10365
4.72083	53408	59977	60135	23224	22473	21282	19506	23177	20793	8590	8035	8285	7979	8214	7972	8002	8101	8130	7936	8317	8364	18711	17962	16626	15065	15636	15671	7905	7806	8427	7872	8195	8136	8015	8455	8293	8023	8515	7778		4.72083	13925	13905	13264	10666	9985	11566	10327	10412
4.76666	54169	59531	60512	23329	22580	21323	19788	23321	21121	8474	8064	8187	7882	8039	8243	7664	8186	8044	8174	8312	8392	19073	17968	16492	15023	15721	15545	8169	7844	8338	7843	8392	7769	8013	8252	8482	8150	8389	7949		4.76666	13923	13994	13346	10779	10085	11396	10885	10439
4.8125	54708	60129	60749	23127	21690	21243	20450	23566	20968	8600	8274	8163	8122	8106	7987	8135	8139	8105	8071	8235	8646	18594	17930	16842	15345	15140	15634	7972	7801	8391	7599	8243	7903	8145	8334	8231	8046	8368	7906		4.8125	14179	14141	13380	10899	9822	11487	11117	10270
4.85833	53853	60280	60553	23283	22251	21034	20234	23702	21193	8351	7893	7947	8089	8062	8205	7906	8118	8099	7928	8251	8383	18612	18061	16689	15207	15666	15364	7876	7794	8299	7934	8158	7851	7955	8298	8265	7878	8427	7774		4.85833	14181	13997	13099	10806	10119	11356	10886	10428
4.90416	54257	60703	61137	23291	22216	21623	19759	23616	21870	8365	8057	8002	8223	8193	8066	7933	8291	8106	8064	8353	8658	18446	18073	16454	14954	15408	15406	7879	7899	8421	7934	8135	7741	8079	8411	8656	7987	8500	7913		4.90416	14233	14006	13224	10722	9797	11475	10743	10054
4.95	54618	60945	61521	22985	22365	21590	19925	23414	21725	8455	7888	8041	7804	7897	8183	7857	8003	7954	7914	8210	8583	18500	18609	16858	15403	15792	15519	7762	7733	8399	7815	8255	8082	7922	8584	8427	7921	8327	7845		4.95	13940	14281	13176	10684	9852	11479	10741	10320
4.99583	54573	60630	60867	22911	23095	21842	19916	23847	21047	8468	7985	7920	8148	8090	8246	8008	8008	8036	8242	8235	8501	18665	18142	16802	15117	15703	15201	7646	8075	8576	7958	8415	7829	8003	8517	8287	7675	8545	7974		4.99583	14091	14066	13001	10847	9831	11404	10807	10537
5.04166	55284	60472	61053	22039	22955	21487	20051	24348	20878	8550	7994	8253	7954	7958	7959	7739	8040	8095	8012	8325	8321	18529	17718	16459	15170	15667	15597	7896	7771	8263	7738	8489	7627	7934	8501	8162	7923	8647	7640		5.04166	14126	14224	13263	10632	9977	11612	11043	10418
5.0875	55586	61058	60967	21000	22649	21664	19904	24124	21633	8333	8068	8211	8219	8070	8278	7945	8057	8324	8131	7961	8546	18585	18058	16756	15184	15500	15619	8017	7890	8353	7804	8645	7897	8088	8347	8485	7904	8279	7954		5.0875	14178	14139	13407	10617	10030	11638	10940	10533
5.13333	54892	61015	61397	21542	22192	21224	20332	24082	21750	8545	8257	8031	8058	8123	8056	8024	8267	7943	7903	8316	8497	19003	18196	16538	15375	15273	15574	8013	7737	8060	7692	8467	7826	7848	8258	8296	7880	8545	7966		5.13333	14422	13943	13059	10559	9752	11462	10624	10335
5.17916	54864	60844	61737	21792	22741	21451	19896	23684	21380	8412	7898	8048	8284	7880	8185	7722	7940	8096	7922	8348	8604	18894	18037	16356	15161	15758	15256	7925	7752	8350	7883	8571	7865	7894	8409	8476	8140	8531	8008		5.17916	14522	14598	13512	10666	10139	11437	10912	10570
5.225	54853	60979	61541	21951	23113	21392	19962	23662	21571	8387	7844	8035	8139	7969	7930	7722	7927	7972	8129	8142	8731	19138	18365	16696	15215	15572	15732	7835	7800	8393	7923	8259	8062	7924	8147	8404	7810	8477	7992		5.225	14489	14065	13525	10587	9931	11507	10797	10463
5.27083	54427	61365	61920	21769	22934	21844	19908	23459	22291	8211	7986	7866	8218	7966	8356	7633	7810	8123	7960	8172	8441	18864	18078	16799	15153	15441	15351	7852	7639	8483	8076	8153	7985	7783	8277	8234	8159	8538	7990		5.27083	14347	14437	13478	10687	9980	11578	10926	10462
5.31666	55336	61206	62543	22001	23130	21633	20227	24227	21905	8516	8131	7830	8276	8022	8072	7934	7880	8093	8088	8097	8476	19050	18312	16982	15503	15490	15560	7971	7863	8551	7812	8164	7849	7850	8445	8430	8146	8483	7820		5.31666	14660	14476	13723	10674	9872	11253	11027	10229
5.3625	55302	61630	62301	21792	22821	21445	20273	23923	22258	8612	7945	7837	7944	7908	8288	7647	7914	8085	8146	8234	8409	19025	17917	16558	15173	15237	15489	7904	7810	8494	7817	8304	7973	7838	8480	8374	8082	8563	8014		5.3625	14360	14199	13380	10646	9608	11444	10881	10397
5.40833	54490	61231	62335	21621	22607	21610	19870	24180	22159	8550	7803	8114	8231	8161	7795	7762	8136	7969	8144	8251	8633	19188	18125	16786	15197	15838	15380	7859	8020	8479	7844	8268	7905	7935	8336	8282	8060	8521	7766		5.40833	14519	13835	13312	10321	9757	11321	11005	10451
5.45416	54841	62015	62049	21483	22921	21402	19874	23672	22423	8345	8025	8042	8057	7961	7874	7519	8051	8174	7863	8216	8629	18879	18602	16822	15304	15507	15614	7767	7782	8550	7610	8112	8117	7933	8427	8346	7936	8283	7981		5.45416	14565	14239	13210	10683	9860	11542	10968	10375
5.5	54981	62007	62772	21456	22517	21585	20099	24194	22163	8869	7879	8021	7982	7908	8004	7832	8172	8214	8073	8104	8562	19078	18108	16795	15311	15465	15553	7985	7660	8501	8008	8250	7879	8426	8457	8229	7965	8303	7684		5.5	14473	14342	13496	10828	9763	11265	10905	10247
5.54583	55211	61588	62554	22047	23009	21709	20439	23636	22517	8231	7783	7999	7916	8189	7957	7622	7696	8070	7989	7921	8801	19218	18322	16661	15473	15772	15407	7887	7735	8306	8001	8207	7898	7764	8253	8402	8047	8125	7797		5.54583	14570	14356	13620	10541	9877	11466	10794	10256
5.59166	54710	61971	61890	22126	23477	21445	20601	24419	22641	8225	7820	7798	8033	7944	7949	7812	8063	7960	8023	8004	8424	18801	18244	16733	14982	15595	15604	8072	7573	8593	7916	8165	8034	7932	7988	8355	7926	8265	7836		5.59166	14809	13897	13471	10393	9699	11250	10768	10736
5.6375	54625	60727	62836	21912	23753	21654	20693	24693	23254	8511	7976	8077	8297	7913	7818	7756	7829	7969	8175	8196	8744	19024	18107	16497	15206	15722	15544	7450	7889	8393	7824	8309	7863	7929	8294	8392	8050	8540	8086		5.6375	14764	14292	13322	10393	9791	11540	11020	10217
5.68333	54753	61852	63186	21896	23309	21899	20441	24325	22676	8526	7795	7929	7903	8135	7947	7663	7835	8012	7999	8035	8466	18970	17980	16554	15470	15992	15570	7892	7708	8629	8021	8485	7784	7803	8147	8174	8072	8501	8186		5.68333	14927	14202	13563	10485	9734	11443	10797	10403
5.72916	54556	62474	62786	22097	23427	21636	20703	24599	22525	8247	7823	8048	7913	8034	8011	7819	8022	8172	7951	7659	8567	18651	17953	16526	15093	15713	15510	7725	8021	8569	7904	8300	7945	7998	8406	8527	8302	8420	7875		5.72916	14658	14656	13522	10549	9759	11454	10959	10222
5.775	54758	62730	62660	21200	23247	22382	20752	24427	22527	8692	7737	8024	7909	7857	8252	7706	8048	8342	7994	8142	8517	18903	17854	16823	15051	15714	15497	7747	7660	8322	7789	8317	8080	8136	8420	8372	7813	8424	7884		5.775	14949	14549	13397	10841	9774	11105	10810	10261
5.82083	54428	62212	62344	21947	23245	22116	20699	24637	22827	8661	8028	8097	7831	8216	8066	7915	8050	8004	8238	7999	8383	19131	18081	16540	15314	15875	15366	7877	7737	8429	7847	8231	7703	7919	8153	8204	8132	8216	8075		5.82083	14804	14302	13867	10423	9772	11576	10865	10249
5.86666	54461	62022	62649	21370	23494	22101	20716	24872	22790	8370	7661	7889	7898	7973	8062	7864	7968	8064	8168	8154	8275	19010	18244	16802	15463	15851	15647	7861	7710	8227	7764	8453	7768	7874	8187	8382	7943	8353	7806		5.86666	14846	14164	13640	10635	9839	11668	10949	10292
5.9125	55170	62163	62243	20908	23570	21648	20294	24915	22884	8362	8061	8211	7972	7862	7889	7792	7962	7968	7720	8238	8383	18961	18055	16821	15324	16113	15661	7933	7968	8368	8027	8138	8000	7891	8294	7851	8005	8355	7786		5.9125	15224	14482	13543	10679	9881	11232	11266	10410
5.95833	55927	62475	62673	21710	23983	22061	20417	24141	23131	8558	7887	7849	7900	8238	8173	7779	7944	7844	8001	8022	8506	19082	18346	16953	15166	15453	15403	7680	7913	8212	7660	8414	7637	8054	8288	8367	8182	8338	7818		5.95833	14943	14452	13518	10634	9890	11446	11017	10056
6.00416	56119	61913	63049	21650	23961	22185	20906	24594	22628	8629	7885	7904	7916	7790	8235	7702	8155	8061	8030	8363	8453	18954	18063	16654	15307	15462	15564	7911	7661	8431	7953	8382	7736	7904	8134	8425	8306	8541	7867		6.00416	14576	14423	13644	10554	9718	11199	11116	10220
6.05	56216	62691	63360	21458	23672	21985	21553	24584	22689	8519	7933	8062	8178	7930	7826	7675	8060	8033	8004	8043	8366	19191	18210	16843	15030	15857	15555	8006	7787	8367	8004	8088	7735	7968	8382	8327	8169	8532	8026		6.05	14965	14732	13637	10468	9787	11646	11247	10717
6.09583	55352	62641	62978	22008	23334	21796	21740	25096	22565	8259	8030	7928	8133	7796	7923	7564	7920	7942	8057	8178	8361	18854	18089	16805	15230	15804	15234	8131	7737	8185	7810	8200	8011	7848	8295	8108	8214	8218	7919		6.09583	15131	15009	13408	10611	9701	11574	11091	10366
6.14166	55516	63033	62758	21314	23705	21884	22441	24750	22885	8243	7983	7915	8064	8159	7978	7829	7953	7822	8116	8138	8215	19225	18235	16730	14844	15272	15484	7758	7886	8200	7848	8147	7863	8008	8562	8021	8326	8434	7973		6.14166	15099	14638	13586	10723	9500	11328	10799	10558
6.1875	54386	61892	62966	21544	23311	22685	22239	24858	23116	8399	8005	8203	8256	8094	8087	7672	7827	7991	7778	7966	8608	19022	17942	16355	15318	15694	15430	7899	7704	8260	7782	8225	7868	7909	8451	8135	8291	8381	7748		6.1875	15038	14426	13551	10770	9481	11579	10819	10439
6.23333	54413	62456	63790	20957	23871	22330	22703	24766	22927	8520	7819	7894	7910	7845	7884	7799	7811	8104	7981	7952	8312	19487	18112	16428	15044	15825	15682	7882	7615	8136	7789	8243	8043	7963	8286	8306	8207	8216	7911		6.23333	15242	14118	13646	10802	9602	11341	10948	10263
6.27916	54837	62764	62948	22141	23657	22460	22566	25096	22337	8558	7938	8002	8031	8047	7959	7563	7708	7942	7777	8061	8365	19183	18035	16979	15137	15476	15684	7826	7696	8221	7995	8242	7759	7912	8051	8449	8286	8406	8129		6.27916	15225	14704	13533	10625	9987	11278	11123	10069
6.325	54747	63012	62769	22559	23413	22380	22449	25063	22736	8360	7911	7920	7937	7879	7990	7853	7873	7956	8060	7983	8386	19066	18093	16819	15469	15677	15394	7474	7711	8491	7912	8552	7709	7906	8308	8091	8519	8191	7639		6.325	15109	14805	13613	10692	9771	11624	11073	10140
6.37083	55401	63147	63742	22097	23592	22549	22226	24980	23446	8587	7949	7744	8071	7895	7986	7720	7753	8127	7996	8185	8300	19521	18234	16647	15516	15372	15561	7805	7711	8295	7747	8291	7703	8011	8318	8216	8095	8396	7915		6.37083	15302	14603	13574	10785	9666	11562	11093	10192
6.41666	55036	62919	62925	22261	23415	22346	22813	25172	23608	8243	7937	8020	8355	8152	7810	7747	7778	7975	8138	8091	8504	19297	18293	16279	15421	15817	15614	7740	7700	8249	7810	8226	7723	8128	8391	8419	8173	8247	7707		6.41666	15290	14503	13724	10789	9636	11471	10987	10127
6.4625	55053	62870	62911	22662	23705	22345	22876	25485	23130	8279	7962	8115	8141	8074	7724	7703	7884	7883	8258	7964	8298	19234	18004	16423	15299	15678	15633	7894	7628	8001	7816	8195	7937	8173	8131	8260	8221	8380	7771		6.4625	14978	14756	13553	10849	9939	11413	11015	10226
6.50833	55533	63152	63544	22641	23580	22681	22905	25360	23023	8442	7952	7981	7770	7867	7887	7676	7855	7828	8152	8015	8323	19562	18047	16343	15420	15587	15589	7519	7533	8223	7872	7970	7814	8025	8334	8373	8190	8204	7867		6.50833	15104	14506	13780	10697	9585	11491	10818	10138
6.55416	54606	63092	63033	23514	23937	22515	22742	25273	23418	8572	7993	7951	8058	8070	7881	7720	7626	7683	7946	7992	8146	19151	18395	16780	15300	15708	15677	7811	7912	8174	7678	8256	7766	8335	8280	8354	8183	8364	7828		6.55416	15546	14801	13805	10440	9627	11447	11177	10649
6.6	55823	63364	63397	22847	23972	22127	22882	25622	23106	8466	7989	7891	8268	7654	7957	7839	7869	8061	7802	8163	8276	19430	18047	16587	15005	15995	15429	7735	7972	8203	7928	8316	7834	8337	8359	7944	8149	8230	7942		6.6	15319	14506	13657	10724	9728	11366	11172	10425
6.64583	55637	62523	63007	23479	23911	22746	22616	25531	22888	8335	8041	7936	7944	7988	8075	7814	7718	8008	7876	8250	8294	19467	18039	16732	15377	15871	15397	7837	7822	8171	7871	7994	7677	8307	8256	8328	8102	8298	7893		6.64583	15625	14395	13716	10861	9659	11600	11092	10487
6.69166	55220	63492	62735	22837	23788	22146	22849	25312	22514	8425	7903	8078	8008	7809	8050	7928	7859	7689	8057	8235	8421	19277	18388	16783	15199	15862	15536	7867	7498	8088	7784	8200	7907	8279	8487	8260	8169	8076	7964		6.69166	15148	14932	13946	10716	9727	11782	11202	10768
6.7375	55515	62875	62943	22220	23792	22600	23047	25279	23356	8297	7930	7894	8154	7853	8172	7836	7827	7791	7930	8184	8403	19550	18368	16581	15703	15876	15377	7875	7621	8174	7838	8245	7953	8438	8060	8272	8069	8246	7761		6.7375	15215	14695	13877	10666	9694	11728	11475	10206
6.78333	55563	62556	63714	22644	24212	22483	23152	24921	23002	8215	7809	7880	8036	7896	7995	7553	7702	8029	7925	7937	8432	19165	17954	16270	15398	15916	15484	7882	7617	7955	7798	8339	7838	8021	8140	8129	8254	8005	7664		6.78333	15349	14790	13540	10861	9788	11618	10918	10828
6.82916	55755	63413	64024	22421	23955	22389	22961	25569	23452	8462	7782	7904	8205	7908	7893	7771	7998	7979	8042	8162	8356	19229	17886	16482	15373	15808	15441	7616	7806	8304	7868	8312	7893	8205	8224	8126	8251	8345	7815		6.82916	15082	14936	13688	10814	9716	11683	11323	11038
6.875	56199	63703	64182	22396	24033	22504	23282	25199	23101	8552	7972	7938	7971	7803	8076	7692	7855	7961	7995	7864	8354	19166	18156	16528	15127	15656	15455	7920	7653	8075	7768	8185	7809	8346	8220	8382	8286	8021	7500		6.875	15490	15056	13781	10687	9687	11375	11205	10760
6.92083	55806	63294	63869	21654	23994	22413	23272	25048	23111	8322	8125	7983	8131	7818	7814	7546	7842	7882	7951	7975	8431	19008	18162	17023	15302	15558	15394	7837	7884	8259	7793	7949	7759	8216	8336	8212	8210	8284	7710		6.92083	15693	14668	13722	10632	9538	11596	11456	10632
6.96666	55305	63277	64095	22340	23703	22428	23565	25631	23160	8271	7808	7964	7898	8046	7979	7853	7812	7872	7769	8027	8337	19511	17955	16455	15505	15801	15492	7569	7641	8200	7785	8285	7620	8460	8080	8117	8275	8178	7902		6.96666	15489	14639	13746	10825	9551	11538	11689	10507
7.01249	55724	63331	63995	22289	24010	22537	23495	25706	23230	8347	7892	7953	8128	7891	7872	7757	7915	7950	7842	8180	8403	19765	18460	16710	15323	15661	15644	7968	7685	8231	7669	8161	7860	8182	8191	8114	8213	8416	7827		7.01249	15498	14665	13727	10526	9491	11548	11486	10878
7.05833	55388	63812	64170	23017	24265	22498	23224	25419	23479	8347	7940	7996	7835	8000	8084	7790	7746	7733	8024	8036	8375	19287	18142	16563	15526	15909	15270	7709	7671	8191	7800	8196	7739	8163	8337	8168	8019	8247	8016		7.05833	15638	14569	13733	10638	9569	11674	11427	10524
7.10416	55852	63379	64021	22560	24243	22622	23909	25426	23048	8452	8055	8050	8008	7908	7853	7654	7925	7547	8044	8197	8319	19321	18006	16503	14989	15715	15506	7834	7891	8227	7656	8206	7643	8196	8236	8220	8328	8166	7665		7.10416	15579	14235	13549	10470	9598	11507	11392	10687
7.14999	55560	63736	64389	23306	24201	22432	23442	25236	23266	8134	7984	7885	8177	7855	8120	7817	7845	8016	8126	8081	8276	19321	17920	16694	15131	15593	15653	7699	7691	8233	7696	8104	7776	8332	8387	8093	8025	8001	8053		7.14999	15583	14365	13635	10713	9409	11889	11443	10766
7.19583	55996	63929	64689	23228	24591	22474	23379	25751	23686	7947	7804	7851	8208	8058	7979	7721	7720	7699	7876	8046	8430	19378	18218	16199	15569	15851	15775	7592	7942	8261	7639	8274	7775	8349	8333	7995	8323	8066	7642		7.19583	15387	14766	13970	10843	9706	11614	11849	10853
7.24166	56283	64739	63531	23415	24187	22591	23508	25837	23292	8347	7891	7868	8007	8060	8113	7578	7836	7908	7927	8312	8450	18883	18278	16405	15465	15883	15471	7716	7539	8098	7885	8044	7704	8345	8227	8134	8334	8309	7760		7.24166	15726	14310	13913	10811	9573	11812	11431	10775
7.28749	56328	64253	63944	23179	24258	22689	23680	25574	23738	8237	7998	7996	8219	7976	8054	7662	7860	7690	7870	7800	8188	19387	18191	16905	15331	15706	15164	7604	7860	8555	7897	8259	7911	8155	8256	8350	8344	8256	7646		7.28749	15411	14485	13668	10773	9361	11520	11416	10644
7.33333	55723	64149	64504	24011	24917	22538	23243	25606	23523	8404	7713	7932	7865	8086	7911	7654	7639	7969	7810	7927	8386	19424	18018	16291	15193	15702	15350	7392	7795	8305	7749	8052	7739	8525	8247	8201	8346	8220	7731		7.33333	15495	14621	13734	10658	9490	11434	11451	10614
7.37916	55714	65118	64526	24154	24230	22586	23613	25838	23342	8201	7833	8140	7872	7930	7892	7780	7975	7804	7976	7797	8438	19401	18272	16682	15203	15828	15144	7671	7424	8775	7721	8075	7699	8167	8243	8351	8505	8371	7755		7.37916	15518	14365	13965	10997	9599	11521	11714	10891
7.42499	56701	63040	64054	22921	24060	22774	23669	25858	23947	8317	7939	7876	7896	7993	7674	7719	7872	7830	8020	7955	8352	19660	17931	16588	15359	16015	15217	7744	7654	8707	7810	8063	7553	8204	8093	8060	8290	8232	7742		7.42499	15582	14720	13818	10602	9941	11552	11533	10673
7.47083	56079	64297	63883	22843	24462	22552	23683	26053	23138	8124	7975	8043	8092	7926	7780	7768	7950	7878	8128	8132	8290	19652	18102	16614	15082	15977	15388	7826	7752	8903	7826	8162	7848	8123	8372	8027	8205	8185	7655		7.47083	15548	14541	14127	10806	9813	11380	11475	10915
7.51666	55705	64424	64060	22175	24620	23022	23808	26217	22965	8315	7716	7864	7969	7720	7876	7636	7811	7942	7841	8075	8405	19107	18067	16533	15486	15926	15330	7760	7785	9028	7657	8031	7718	8223	8155	8217	8122	7938	8048		7.51666	15507	14623	14181	10704	9703	11670	11621	10758
7.56249	56382	64091	65218	21593	24443	22693	23543	25604	23092	8251	7814	7874	8207	7818	7978	7733	8029	7844	8239	7909	8099	19433	18332	16521	15664	15664	15686	7744	7833	8830	7742	7991	7842	8415	8115	8162	8202	8057	7676		7.56249	15428	14323	13555	10752	9654	11522	11460	10459
7.60833	55788	64051	64832	22339	24426	22389	23485	25768	23455	8365	7831	7973	7907	7747	7925	7796	7728	7951	7909	8109	8178	19886	18116	16663	15591	15826	15364	7616	7651	8915	7691	8069	7968	8110	7942	8276	8107	8271	7622		7.60833	15295	14472	13750	10715	9722	11386	11313	10411
7.65416	56011	64440	64440	21906	24404	22584	23691	25207	23630	8328	7882	7943	8177	7895	7945	7622	7663	7895	7793	8031	8285	19799	17983	16749	15422	15903	15489	7807	7659	8906	7745	8035	7654	8252	8203	8293	8293	8112	7797		7.65416	15306	14941	13713	10626	9704	11468	11618	10838
7.69999	55934	64457	64612	20940	24494	22506	23402	25878	23201	8451	8135	8074	8237	7826	7905	7697	7890	7910	7702	8307	8247	19534	18090	16492	15437	15773	15297	7885	7650	9379	7602	8357	7889	8273	8162	8138	8083	8198	7686		7.69999	15694	14736	13576	10809	9690	11488	11649	10497
7.74583	56435	64681	64391	20767	24151	22643	23633	25527	23334	8322	7974	7873	7923	7787	8009	7592	8106	7849	7969	8137	8308	19513	18705	16519	15238	15573	15186	7509	7667	9339	7587	8013	7621	8179	8195	8157	8295	8234	7801		7.74583	15420	14914	14166	10912	9758	11499	11530	10636
7.79166	56286	64511	64596	21385	24201	22553	24047	25364	23078	8228	7833	8147	7722	7880	7745	7971	7890	7992	8141	7799	8372	19723	17969	16174	15320	16087	15286	7682	7372	9168	7674	7976	7542	8089	8375	8107	8240	8006	7779		7.79166	15639	14985	14155	10780	9602	11348	11495	10683
7.83749	56054	64450	64843	20837	24106	22750	23305	25987	23015	8348	7941	8004	8076	7949	7694	7779	7812	7856	7963	7974	8294	19645	18335	16443	15181	15454	15332	7682	7751	9263	7786	8039	7693	8249	8235	7999	8241	8154	7680		7.83749	15543	14504	13621	10854	9937	11671	11473	10456
7.88333	56450	64772	64788	21108	24048	22550	23932	26019	23422	8204	7899	7876	7885	7839	7963	7812	7665	7976	7880	7831	8163	19565	18415	16658	15256	16016	15167	7719	7582	9402	7789	8059	7682	8198	8115	8453	8132	8425	7742		7.88333	15732	14787	13667	10620	9839	11521	11507	10640
7.92916	57153	65134	65346	21628	24477	22285	23725	25683	23720	8200	7879	7937	8287	7929	8079	7794	7964	7807	7752	8110	8357	19472	18041	16747	15261	15795	15399	7653	7524	9450	7694	8349	7760	8232	8030	8177	8077	7969	7690		7.92916	15675	14773	14054	10513	9582	11670	11419	10764
7.97499	56529	64975	64741	21595	24643	22760	23710	26038	23345	8295	7915	8044	7804	7860	7919	7690	7693	7673	7951	7721	8220	19473	18169	16583	15563	15884	15437	7746	7645	9614	7589	7907	7867	8479	8264	8092	8110	8242	7610		7.97499	15636	14894	14145	10833	9823	11694	11725	10819
8.02083	56437	64347	64426	21619	24608	22399	23994	25569	23693	8424	7771	7972	8019	7837	8031	7490	7896	7991	7983	8014	8296	19477	18194	16546	15154	15723	15477	7744	7674	9637	7683	8048	7583	7984	8318	8206	7997	8178	7740		8.02083	15961	14841	13890	10368	9353	12070	11426	10652
8.06666	56502	64276	64958	21506	24881	22741	24066	26141	23475	8197	7828	8081	8007	7874	7985	7656	7790	8035	7986	7959	8112	19986	18374	16480	15197	16153	15240	7853	7850	9977	7690	8119	7760	8186	8109	8282	8478	8191	7552		8.06666	16072	14754	13897	10959	9693	11580	11448	10726
8.11249	56104	64890	65179	21777	24556	22902	23885	26201	23287	8358	7786	7988	7978	8216	7762	7631	7682	7850	8077	7769	8076	19731	18262	16519	15559	15845	15203	7672	7905	10018	7610	8108	7740	8095	8395	8226	8087	8244	7728		8.11249	15962	14708	13941	10859	9668	11586	11615	10893
8.15833	55835	65158	64678	21828	24775	22909	24330	25926	23541	8348	8209	7800	7910	7658	7731	7283	7598	7760	7915	7722	8284	19841	18271	16425	15206	15845	15211	7859	7654	9872	7711	8081	7543	8232	8092	8243	8074	8052	7758		8.15833	15864	14549	13796	10885	9868	11658	11424	10813
8.20416	55807	64726	65001	21972	24594	22999	23928	25957	23471	8199	7833	7572	7875	7825	7952	7736	7643	8068	7877	7979	8051	20012	18250	16405	15732	15810	15443	7839	7613	10146	7744	8058	7738	8288	8199	8386	8223	8318	7810		8.20416	15582	14581	13986	10822	9519	11921	11357	10483
8.24999	56123	64684	64606	20331	24834	22621	23704	25886	23855	8253	8092	7916	7806	7937	7929	7663	7737	7844	8167	8027	8339	19471	18281	16492	15353	16013	15079	7613	7751	10346	7666	8020	7838	8168	8154	8279	7953	8113	7726		8.24999	15796	15024	14197	10789	9461	11834	11509	10790
8.29583	55550	64457	65122	20513	24738	23015	23973	26190	23670	8326	7913	7823	7961	7754	7789	7608	7892	7915	7969	8078	8108	19391	18414	16770	15452	15973	15142	7822	7649	10688	7878	7963	7677	8071	8121	8156	8005	8256	7899		8.29583	15682	15027	14188	10669	9729	11793	11556	10788
8.34166	56183	64861	65272	20117	24861	23105	23940	26277	23550	8334	7819	7953	8038	7848	7909	7559	7536	7843	7768	8257	8219	19439	18014	16677	15544	15897	15351	7585	7577	10654	7535	8025	7720	7934	8119	8258	8183	8363	7738		8.34166	15509	14947	14154	10688	9485	11675	11500	10600
8.38749	56131	64926	65219	20630	24551	22756	24274	25736	22966	8062	7667	7938	8239	7730	8048	7441	7587	7656	7867	7934	8161	19447	18248	16483	15382	15752	14957	7620	7448	10843	7778	8064	7614	8228	8227	8237	7997	8102	7785		8.38749	15451	14906	14080	10833	9719	11937	11482	10469
8.43333	55337	64372	65216	21546	24924	23219	24161	26454	23156	8347	7841	7785	7988	7920	7805	7506	7608	7825	7919	7838	8235	19395	17821	16101	15244	16011	15740	7468	7677	10849	7430	8047	7587	8147	8177	8200	8323	7953	7889		8.43333	15913	14931	13999	11009	9815	11616	11203	10603
8.47916	55760	64805	65697	22844	24538	23046	24027	26019	23365	8513	7855	8004	7877	7953	7765	7580	7891	7907	7806	7878	8084	19817	18534	16309	15179	15874	15537	7624	7457	10917	7794	8077	7759	8032	8143	8214	8133	8321	7710		8.47916	15697	15030	14079	10785	9813	11771	11412	10648
8.52499	55989	64682	65221	23137	24718	22954	24138	26178	24020	8597	7821	7934	7859	7883	7829	7878	7841	7897	8103	8092	8067	19912	18522	16867	15465	15940	15539	7712	7847	11185	7901	8175	7587	8103	8170	8088	8228	8204	7767		8.52499	15893	14891	14097	10804	9694	11865	11487	10658
8.57083	56609	64821	65628	23667	24872	23287	24220	26566	23395	8448	7769	7871	7811	7802	8162	7677	7731	7863	7581	8162	8128	19596	18383	16322	15426	15921	15134	7555	7614	11440	7754	8159	7707	8260	8287	8141	7895	8099	7946		8.57083	15804	14789	14038	10974	9785	11998	11511	10737
8.61666	56764	64861	65166	23689	24352	23302	24220	26648	23931	8325	7592	7784	8050	8019	7961	7612	7689	7790	7689	8052	8292	19624	18345	16296	15310	15789	15023	7591	7723	11295	7510	8264	7605	8223	7917	8211	8112	8054	7631		8.61666	15818	15175	14082	10928	9555	11693	11433	10807
8.66249	56466	65703	65716	23877	24845	23005	24167	26293	23430	8153	7670	7843	8028	7679	7835	7619	7832	7801	7942	7816	8132	19344	18198	16451	15276	15949	15433	7651	7539	11699	7989	8112	7685	8015	8184	8113	8207	8087	7666		8.66249	15895	15028	13841	10841	9505	11739	11657	10874
8.70833	56741	65004	65560	24396	25002	23057	24197	26228	23777	8318	7762	7860	7771	7647	7946	7789	7578	8040	8116	7842	8274	19532	18245	16436	15346	15636	15441	7825	7501	11685	7714	7908	7652	8136	7946	7921	8189	8193	7713		8.70833	16027	15097	14090	10784	9601	11818	11627	10709
8.75416	56680	65103	65417	24790	24403	22961	24130	26049	23590	8321	7765	7883	7900	7727	7901	7801	7610	7842	7893	8120	8316	19340	18246	16654	15533	15952	14957	8027	7689	11935	7733	8192	7568	8345	7952	7976	8145	8205	7747		8.75416	16340	14903	14107	10986	9630	11826	11670	10759
8.79999	56609	65595	64962	24030	24758	23171	24513	26415	23881	8284	7716	7745	7950	7778	7905	7611	7734	8094	7840	8007	8001	19515	18360	16771	15300	16311	15279	7636	7521	12013	7604	8163	7666	8209	7980	8156	8172	8141	7805		8.79999	15889	14889	14089	10801	9309	11791	11466	10898
8.84583	56069	65612	65467	23722	24635	23266	23966	26750	23955	8259	7811	7793	8114	7527	7819	7771	7855	7799	7884	8109	8359	19857	18196	16276	15143	15612	15016	7535	7516	12027	7699	8171	7866	8332	8153	8294	8127	8200	7761		8.84583	15734	15070	14254	10796	9273	11832	11428	10581
8.89166	55907	65914	66189	24305	25097	22799	24343	26031	24109	8485	7849	7960	8162	8026	7699	7859	7824	8046	7929	7879	8214	19983	18363	16734	15396	15780	15342	7538	7638	12071	7805	8030	7606	8213	8388	8074	8092	8168	7772		8.89166	15951	14853	14081	10780	9524	11758	11725	10911
8.93749	55862	65098	65574	24129	24688	23355	24234	26128	23918	8409	7780	7967	7869	7804	7765	7469	7712	8009	7961	7883	8011	19483	18453	16477	15087	16038	14945	7621	7458	11946	7698	7986	7679	8176	8118	8213	8089	8038	7743		8.93749	15904	15284	14098	10670	9729	11787	11827	10751
8.98333	56552	65829	65767	24038	24740	23005	24169	26597	24139	8415	7767	7820	7896	7800	7767	7566	7677	7813	7789	7963	8050	19476	18330	16975	15197	15932	14870	7692	7641	12227	7754	8213	7685	8145	8244	8142	8227	8067	7699		8.98333	15811	14855	13917	10726	9565	11758	11554	10792
9.02916	56262	65377	65765	24298	24827	23045	24107	26779	23872	8701	7895	8044	7783	7588	7979	7642	7782	7879	7999	7689	8337	19926	18449	16358	15128	15610	14955	7547	7684	12493	7682	8119	7685	8366	8140	8282	7970	8283	7681		9.02916	16052	14770	14226	10655	9709	11812	11621	10509
9.07499	56002	64096	65177	24000	24522	23266	24087	26369	24064	8272	7772	7855	8026	7769	7692	7553	7664	7860	7802	8093	8214	19783	18111	16736	15331	16073	15144	7755	7968	12593	7656	8210	7744	8170	8167	8103	8066	8055	7671		9.07499	16410	14794	13796	10685	9706	11713	11483	10736
9.12083	55877	65679	65397	24148	24500	23077	24045	26657	23805	8302	7673	7808	7982	7713	7877	7726	7712	7549	7763	7980	8207	19949	18287	16704	15402	15792	15216	7467	7743	12665	7756	7945	7647	8314	8253	8079	8057	8099	7842		9.12083	15966	14706	14146	10496	9815	11778	11818	10676
9.16666	56082	64970	65788	24129	24539	23110	24293	26686	24169	8480	7801	7776	7950	7902	7778	7369	8026	7725	7987	7912	8081	19706	18361	16524	15316	16166	15212	7599	7664	12849	7759	8146	7396	7996	8099	7923	8180	8075	7849		9.16666	16400	15236	13881	10845	9651	11509	11496	10963
9.21249	55952	65526	65394	23460	24556	23264	24347	26450	24066	8352	7871	8047	7929	7762	7937	7927	7662	7806	7712	7747	8166	19400	18128	16636	15329	15780	15386	7775	7431	13049	7602	8113	7593	8246	8223	8206	8207	8174	7822		9.21249	16292	15216	14142	10913	9818	12140	11773	10623
9.25833	55818	65489	65471	23498	24402	23236	24389	26460	23647	8394	7934	8077	7854	7801	7901	7599	7785	7849	7893	7946	8243	19983	18217	16564	15350	15742	15235	7671	7725	13206	7565	8090	7578	8245	8336	8234	8245	8071	7776		9.25833	16165	14568	13959	10687	9475	11842	11970	10712
9.30416	56708	65429	65391	23548	24413	23337	24496	26106	24032	8549	7615	8116	7996	7696	7854	7711	7701	7841	8022	7832	8129	19655	18244	16521	15464	15965	14856	7576	7671	13220	7838	7833	7550	7963	8150	8117	8086	8160	7779		9.30416	16211	14690	13959	10572	9624	11763	11449	10694
9.34999	55318	65796	66204	23485	24771	23240	24364	26389	24139	8387	8001	8124	7853	7600	7983	7358	7693	7800	7996	8154	8204	20000	18074	16550	15116	15892	15440	7659	7486	13182	7701	8161	7792	8257	8364	8029	8210	8219	7661		9.34999	16361	14886	14223	10667	9484	11699	11701	10559
9.39583	55731	65008	66085	23449	24617	22912	24499	26382	24056	8483	7762	8027	7891	7638	7962	7454	7650	7800	7703	7894	8046	19741	18402	16468	15133	15818	14972	7714	7682	13330	7554	8031	7748	8058	8069	8250	8103	8092	7606		9.39583	16438	14902	13997	10703	9601	11886	12028	10786
9.44166	56169	65175	65929	23485	24647	22795	24887	26001	24505	8414	7783	7759	7933	7824	8020	7460	7912	7678	7980	8010	7934	19431	18093	16301	15590	15820	15212	7687	7597	13223	7482	7973	7566	8179	7813	7985	8047	8410	7790		9.44166	16038	15072	14017	10837	9506	11509	11563	10775
9.48749	56859	65910	65086	23587	25047	22819	24298	26171	24087	8486	7821	7822	7954	7652	7911	7701	7576	7817	7853	7942	7996	19585	18205	16732	15404	16192	15150	7564	7747	13688	7834	8065	7757	8358	8139	8056	8163	7964	7672		9.48749	16161	15137	14113	10850	9689	11926	11876	10823
9.53333	56461	66022	66175	23770	24563	22903	24357	26728	24578	8381	7930	8082	7939	7904	7920	7587	7624	7749	7652	8230	8210	19890	18085	16422	15486	15799	14834	7519	7371	13717	7747	7998	7507	8010	8282	8234	7921	8063	7825		9.53333	16337	15174	14191	10806	9843	11807	11572	10503
9.57916	55855	64812	65772	23672	25073	23540	24408	26416	24112	8315	7872	8062	8044	7765	7866	7771	7780	7725	7791	7758	8492	19799	18017	16529	15519	15989	14899	7704	7453	13404	7562	8112	7694	8173	8322	8072	8213	8304	7631		9.57916	16136	15271	14105	10995	9384	11649	11568	10644
9.62499	56531	65875	65408	24184	24741	22897	24594	26433	24265	8364	7808	7974	8114	7721	7707	7621	7781	7945	7890	7942	8263	19619	18636	16591	15880	15448	15363	7668	7617	13509	7769	8158	7830	8216	7912	8127	8099	8049	7707		9.62499	16117	15094	14288	11033	9440	11993	11728	10783
9.67083	56288	65890	65992	24098	25012	23277	24315	26226	24544	8371	7780	7782	7845	8027	8041	7301	7922	7989	7881	8053	8002	19501	18414	16448	15401	15898	15279	7627	7796	13686	7615	8081	7585	8180	8437	7974	7961	8185	7630		9.67083	16323	15163	13994	10822	9737	11812	11705	10749
9.71666	56181	65698	66037	24401	24779	23271	24763	26278	24379	8484	7807	8070	7994	7727	7730	7483	7748	7493	7748	7997	8121	19853	18233	16611	15588	15832	15150	7626	7680	13492	7543	7917	7449	8234	7936	7992	7999	7922	7767		9.71666	16472	14866	14116	10916	9419	11851	11571	10485
9.76249	56501	65191	65742	24233	25212	23080	24735	26766	24053	8393	8042	8036	7662	7623	7954	7707	7747	7877	7767	8085	8133	19805	18201	16225	15299	15586	15110	7595	7341	13854	7643	8014	8021	8136	8078	8116	8015	7810	7764		9.76249	16349	15047	14077	11005	9584	11890	11604	10903
9.80833	56498	65463	66569	24118	25070	23781	24914	26531	23873	8334	7801	8192	7877	7735	7861	7387	7767	7918	7936	7869	8246	19712	18245	16561	15212	15849	15384	7602	7453	13750	7686	8138	7713	8224	8150	8165	7967	8216	7752		9.80833	16379	15210	14203	11117	9767	12070	11761	10692
9.85416	56008	65247	65789	24053	24862	23182	24482	26207	23964	8670	7892	8041	7946	7899	7886	7686	7856	7730	7758	7834	8238	19858	18184	16351	15564	16097	15051	7615	7511	13988	7762	8009	7700	8288	8037	8034	8111	8221	7709		9.85416	16280	15291	14426	10738	9727	12209	11735	10740
9.89999	55613	65496	65735	23770	25078	23485	24852	26219	23857	8603	7920	7900	7996	7865	7825	7537	7924	7877	7936	7854	8103	19793	18411	16380	15379	16117	15081	7650	7522	14170	7776	7944	7717	8045	8509	8116	7966	8097	7655		9.89999	16449	15152	13974	10834	9391	11945	11623	10655
9.94583	56153	65457	65932	24065	25391	23272	24905	26346	24023	8758	8014	7952	7929	7773	7832	7560	7836	7695	7850	7937	8053	19647	18475	16598	15241	15776	15326	7512	7515	14294	7534	8136	7921	8263	8149	8115	8130	8210	7703		9.94583	16686	14928	14116	10892	9719	11997	11829	10721
9.99166	56327	65707	65338	24418	25007	23155	24531	26387	23957	8511	7891	7795	7962	7885	7873	7638	7821	7633	7730	7888	8052	19921	18183	16320	15680	15884	14820	7562	7652	14023	7434	8161	7732	8121	8280	8059	8274	8145	7486		9.99166	16744	15227	14243	10591	9443	11513	11744	10658
10.0375	57172	66343	65993	23829	25337	23529	24818	26648	24152	8679	7692	7992	7920	7687	7722	7524	7739	7902	7742	7913	7987	19952	18243	16536	15376	15613	14949	7703	7747	14498	7538	7892	7862	8072	8001	8229	7973	8057	7921		10.0375	15887	14954	13968	10943	9791	12100	11855	10717
10.0833	56687	65845	65636	23346	25343	23069	24711	26214	23982	8849	7812	7753	7906	7517	7749	7489	7866	7796	7750	7842	8302	19783	18348	16231	15258	15783	15354	7849	7447	14238	7670	8123	7604	8041	8173	7944	8127	7977	7826		10.0833	16329	15126	14216	11048	9791	12098	12040	10585
10.1292	56953	65857	65387	23541	25070	23042	24690	26399	24177	8625	7776	7851	7945	7968	7756	7738	7561	7936	7871	8027	8109	19686	18355	16546	15513	15991	15029	7702	7618	14266	7647	8070	7584	8152	8286	8078	8022	7925	7602		10.1292	16541	14992	14344	10762	9594	11990	11746	10610
10.175	56614	65442	66221	24041	24741	22726	24660	26935	23986	8590	7757	7880	7847	7576	7907	7691	7881	7733	7870	7794	8041	19965	18725	16884	15407	16042	15423	7639	7373	14369	7334	8117	7687	8289	8010	8019	8236	7982	7729		10.175	15969	15199	14272	10978	9734	12127	11694	10618
10.2208	55940	65773	65376	23845	24787	23223	24654	26713	24350	8550	7930	8063	7941	7569	8123	7459	7606	7565	7979	7778	8351	19550	18335	16437	15235	15691	15275	7471	7661	14726	7410	8085	7686	8024	8116	8098	8056	8205	7915		10.2208	16287	15113	14207	10968	9514	12025	11734	10551
10.2667	56302	66539	65991	23642	25042	23228	24780	26590	24307	8688	7768	8200	7908	7768	7811	7432	7787	7776	7804	8034	8082	19847	18288	16336	15841	15747	15031	7510	7626	14562	7906	8030	7729	8344	8019	7939	8059	8084	7692		10.2667	16596	14855	14562	10778	9413	11654	11657	10511
10.3125	56650	65972	66729	24790	25073	23076	24756	26584	24507	8573	7815	8161	8062	7786	7950	7484	7651	7827	7955	7840	8059	19649	18054	16453	15669	15709	15259	7596	7398	14565	7574	8143	7556	8076	8221	8112	8006	8214	7844		10.3125	16174	15083	13948	10755	9760	11816	11776	10854
10.3583	56566	65901	66026	24613	25098	23673	25010	26310	24103	8748	7482	8068	7941	7558	7917	7665	7852	7574	7878	7727	8412	19374	18329	16470	15627	15863	15259	7600	7467	14562	7828	7751	7689	8091	8032	7997	8051	7954	7849		10.3583	16087	15124	14502	10690	9794	11862	11992	11079
10.4042	56481	66192	65965	24488	25142	23648	24950	26409	24704	8575	7934	8038	7647	7869	7998	7629	7676	7791	7837	7823	8229	19644	18092	16491	15170	16200	15569	7536	7782	14718	7752	8085	7842	8192	8112	7976	7996	7952	7741		10.4042	16393	15123	14215	10664	9843	11799	11470	10804
10.45	56305	65778	66776	24856	25373	23073	24894	25772	24205	8598	7608	8182	7973	8053	7843	7606	7800	7705	7813	7866	8309	19705	18239	16578	15571	15408	15163	7625	7378	14650	7575	8016	7766	8066	8197	8218	8025	8136	7481		10.45	16304	15137	14198	10858	9704	11831	11721	10440
10.4958	55515	65273	66436	24795	24955	23093	24779	26683	23850	8795	7892	8093	7942	7789	8090	7626	7724	7750	8191	7946	8068	20017	18501	16808	15532	15709	15202	7383	7629	14472	7890	8122	7967	8088	7997	8008	8000	8022	7499		10.4958	15981	14673	14055	10907	9334	11755	11890	10663
10.5417	55628	65834	66492	24863	25232	23431	24578	26485	24422	8730	7843	8448	7858	7839	7874	7396	7753	7886	7805	7674	8189	19891	18497	16595	15267	16218	15015	7664	7368	14704	7600	8013	7612	8186	8123	8155	8162	8082	7673		10.5417	16536	14855	14166	10749	9718	11955	11591	10548
10.5875	56586	65577	66461	24590	25113	22904	24845	26362	24100	8752	7688	7993	7819	7790	7741	7609	7788	7957	7889	7894	8290	19934	18241	16843	15551	15997	15561	7540	7718	15041	7816	8135	7565	7901	8041	8099	8373	8119	7788		10.5875	16184	14990	13976	10837	9686	11863	11789	10756
10.6333	56672	66133	66492	24752	24770	23178	24954	26359	24273	8559	7867	8008	7676	7796	8118	7513	7892	7862	7762	7688	8188	20174	18630	16625	15575	16010	15096	7568	7753	14758	7430	7982	7812	8296	8225	8053	8022	8240	7730		10.6333	16572	15318	14367	10703	9648	11771	11809	10878
10.6792	56549	65838	65825	25120	25202	22691	24744	26330	24170	8702	7659	7818	7841	7799	7884	7502	7802	7932	7785	7676	8184	19949	18382	16745	15473	15957	15010	7563	7584	15084	7568	8101	7739	8025	7971	8081	8221	7934	7551		10.6792	16478	15431	14437	10903	9513	12044	11483	10591
10.725	56689	66351	66336	25261	24967	23446	24938	26387	24372	8758	7999	8076	7853	7824	7732	7600	7731	7663	7911	7864	7972	19548	18374	16521	15381	15646	15209	7747	7682	14905	7560	7738	7582	8284	7924	8041	8197	7902	7754		10.725	16744	15340	14342	10979	9465	12111	11588	10369
10.7708	56497	65886	65978	25169	24880	23376	24739	26638	23933	8461	7766	8171	7932	7680	7863	7785	7853	7730	7625	8062	8390	19770	18279	16638	15474	15899	15302	7732	7401	14642	7687	7773	7537	8063	8190	8146	8089	7896	7716		10.7708	16715	14922	14327	10928	9716	12113	11874	10838
10.8167	55989	66272	66589	25652	24683	23155	24717	26844	24306	8549	7811	7943	7863	7555	7851	7517	7737	7912	7749	7752	8141	19970	18171	16463	15388	15834	15218	7651	7530	14749	7874	8387	7615	8202	7948	8009	8236	8187	7778		10.8167	16576	15375	14398	10800	9632	11661	11774	10735
10.8625	55691	66283	66239	25395	24809	23382	25017	26316	24372	8669	7966	8177	8020	7516	7734	7361	7590	7681	7964	7796	8140	20071	17994	16615	15308	16231	15190	7608	7646	14900	7757	7992	7815	8051	7994	7895	7895	8100	7542		10.8625	16414	14887	14230	10885	9799	12094	11813	10534
10.9083	55584	66101	66224	25097	25265	23102	24490	26297	23980	8762	7765	8036	7904	7692	7679	7800	7981	7801	8122	8069	8085	19513	17967	16667	15250	15977	15095	7659	7588	14763	7730	8032	7833	8062	7963	8120	8077	7993	7739		10.9083	16104	15173	14089	10658	9612	11895	11655	10850
10.9542	55861	66111	66157	24936	24714	23031	25115	26380	24146	8757	7957	8037	7723	7797	7674	7408	7588	7896	7759	7970	7947	19785	17967	16868	15374	16004	14961	7543	7514	14885	7533	7914	7857	8431	8014	8162	8172	8000	7701		10.9542	16512	15082	13951	10811	9590	11927	11665	10277
11	56126	66278	65916	25577	24918	23369	24401	26850	24097	8803	7657	7972	7767	7962	7821	7565	7446	7541	7777	7826	8189	19926	18310	16466	15090	16059	15022	7616	7593	15167	7597	7928	7696	8414	8175	7891	7784	8122	7659		11	16093	15102	14086	10671	9701	11778	12043	10609
11.0458	55669	65795	66308	25146	24927	23386	24852	26509	24580	8924	7802	8074	7927	7831	7928	7645	7792	7844	7649	7698	8139	19610	18416	16565	15149	16258	14992	7723	7644	14923	7625	8032	7622	8187	8129	7983	8281	8020	7610		11.0458	16694	14812	14265	10843	9722	11892	11628	10614
11.0917	55703	66163	66000	24800	24943	23049	24832	26707	24023	8811	7853	8054	7896	7776	7864	7662	7767	7707	7932	7896	8319	19693	18000	16291	15337	15881	15484	7659	7488	14982	7707	7868	7861	7771	8050	8126	7929	8167	7750		11.0917	16679	15028	14279	10721	9673	11958	11754	10349
11.1375	56099	66153	66641	25524	25223	23374	25109	26443	24631	8763	7892	8159	7725	7887	7799	7634	7685	7727	7713	8047	8045	19520	18122	16669	15561	16123	15251	7655	7595	15234	7795	7801	7694	8181	7998	8087	8072	8130	7618		11.1375	16295	15271	14372	10627	9624	11943	11738	10645
11.1833	55606	65832	67124	25487	25229	23395	25127	26292	24142	8686	7940	8181	7679	7733	7827	7833	7683	7775	7846	7864	8318	19997	17899	16469	15240	15959	15003	7678	7440	14866	7380	8016	7775	8255	7987	8110	8004	7808	7627		11.1833	16697	15319	14080	10760	9652	11985	11779	10710
11.2292	56054	65310	66338	25174	25197	23366	25197	26760	23958	8826	7726	8558	7782	7743	7980	7495	7801	7903	7754	7943	8237	19890	17963	16632	15606	16055	14800	7672	7709	15264	7756	7791	7659	8305	8007	8080	8031	8223	7699		11.2292	16297	14885	14139	10689	9709	12154	11765	10498
11.275	56318	66294	66142	25535	25325	22896	25034	26337	24877	8979	7821	8328	7978	7761	7818	7456	7939	7879	7796	7876	7929	19819	18044	16415	15218	15985	15120	7476	7688	15018	7687	7937	7566	8126	8077	7900	8079	7896	7755		11.275	16425	15014	14101	10757	9489	11926	11927	10738
11.3208	55964	66001	66215	25411	24679	23528	25261	26577	24250	8726	7701	8141	7860	7696	7883	7687	7670	7824	7849	7894	8252	19968	17929	16822	15087	15962	15274	7539	7663	15158	7766	8080	7511	8027	8069	8019	7942	8135	7559		11.3208	16412	14726	14328	10628	9765	11963	11906	10743
11.3667	55768	66298	66267	25000	25431	23235	25226	26706	24011	8930	7771	8277	8027	7602	7725	7596	7777	7712	7924	7983	8147	20164	18682	16289	15313	16288	15307	7570	7565	15069	7671	8019	7752	8109	8126	8087	8212	8095	7746		11.3667	16567	15128	14323	10910	9602	11850	11879	10527
11.4125	56141	65429	66299	25329	25033	23796	24855	26515	24532	9042	7806	8166	7877	7773	7593	7617	7829	7698	7936	8059	8159	19728	18439	16863	15528	16011	15571	7667	7324	15104	7458	8058	7946	7914	8000	8079	7970	8126	7528		11.4125	16503	15231	14303	10722	9680	12134	11700	10688
11.4583	56020	65741	66782	24811	24502	23448	25474	26344	24377	8873	7755	8139	7763	8016	7836	7367	7685	7787	7769	7805	8357	20066	18541	16533	15085	15815	14878	7797	7471	15142	7685	7885	7756	8097	7963	8084	8202	8047	7750		11.4583	16391	15051	14155	10912	9704	12250	11767	10449
11.5042	55819	66434	66955	25628	24765	22891	25450	26337	23915	8849	7698	8244	7878	7695	7648	7504	7841	7732	7851	8055	8137	19831	18252	16255	15440	15836	14744	7487	7450	15314	7528	7907	7739	8279	8140	8122	8047	7762	7410		11.5042	16378	14998	14138	10764	9607	11838	11860	10571
11.55	55578	66208	66480	25697	24965	23725	25512	26765	24335	9072	7742	8149	7717	7675	7778	7536	7693	7896	7711	8113	7992	20439	18581	16502	15224	15962	15258	7608	7656	15303	7610	7769	7615	8065	8075	8152	8009	7996	7525		11.55	16561	15382	14098	10630	9573	12049	11524	10578
11.5958	56269	66223	66116	25710	24563	22907	25382	26213	24434	9268	7807	8234	7962	7701	7881	7325	7801	7729	7760	7666	8013	20147	18093	16524	15337	16070	15216	7705	7733	15143	7503	8068	7419	8050	8064	7932	8177	8016	7696		11.5958	16255	15000	14224	10826	9611	12350	11938	10695
11.6417	55527	66162	66300	25982	25147	23055	25157	26863	24367	9051	7812	8071	7911	7704	7911	7526	7718	7758	7771	7898	8148	20214	18338	16470	15337	15860	14744	7622	7684	15115	7717	8087	7649	8380	8184	8074	8053	7866	7632		11.6417	16850	15304	14058	10920	9542	11899	11619	10715
11.6875	55691	65433	65945	25845	25433	23235	25476	26690	24360	8929	7830	8196	7831	7854	7820	7464	7760	7803	7739	7789	8060	19956	18052	16674	15240	15993	15297	7611	7351	15447	7770	7817	7740	8231	8130	7753	8094	7902	7428		11.6875	16609	15000	14165	10873	9570	11926	11898	10611
11.7333	55311	66654	66348	26054	24828	23295	25386	26660	24474	9052	7638	8088	8048	7858	7651	7544	7588	7712	7883	7927	7958	19597	17940	16232	15276	16054	15211	7501	7556	15312	7925	7987	7732	8203	7831	8081	8173	7891	7699		11.7333	16170	15461	14081	10673	9492	11814	11620	10434
11.7792	55920	66774	66481	25748	24950	23377	25333	26532	24477	9193	7596	8213	7783	7839	8119	7742	7674	7649	7818	7796	8164	20384	18214	16586	15290	15846	15089	7651	7622	15524	7713	7949	7665	8092	7959	7903	8074	7990	7628		11.7792	16225	15231	14100	10630	9364	11940	11704	10485
11.825	55417	65959	66317	26751	25397	23113	25445	26531	24014	9050	7971	8342	7882	7756	7820	7565	7714	7671	7765	8047	7955	19528	18494	16688	15237	15703	15131	7421	7589	15632	7833	7966	7899	8104	8274	8172	8430	7990	7531		11.825	16783	15001	14179	10743	9502	11733	11754	10356
11.8708	56637	66525	66781	26126	25263	23382	25117	26572	24115	9145	7610	8362	7735	7727	7840	7569	7486	7844	7794	8016	8137	20004	18105	16621	15314	15711	15203	7666	7491	15409	7442	7952	7673	8011	8177	7933	8082	8100	7602		11.8708	16340	15073	13847	10939	9721	11933	11722	10446
11.9167	56198	66019	66545	25975	24950	23412	25046	26725	24020	9102	7707	8283	7783	7656	8017	7210	7649	7797	7676	7950	8232	19827	17921	16360	15634	15714	15236	7490	7661	15294	7512	7756	7516	8333	8000	7959	7919	7826	7628		11.9167	16690	15286	14177	10731	9607	11873	11693	10562
11.9625	56503	66524	65973	25998	25340	23065	25632	26895	24634	9228	7756	8266	7875	7542	7752	7412	7730	7649	7826	7911	8075	19924	18146	16615	15382	15987	15141	7613	7595	15577	7568	7979	7737	8231	8208	8079	8034	8084	7651		11.9625	16612	15150	14282	10654	9447	11730	11425	10675
12.0083	56088	66147	66348	26428	25204	23307	25499	26053	24246	9058	7758	8483	7698	7745	7809	7587	7601	7688	7752	8072	7980	20109	17817	16331	15226	15950	15145	7572	7616	15380	7452	7898	7897	8000	8038	7884	7941	8038	7616		12.0083	16586	15070	14275	10788	9533	12157	11873	10920
12.0542	55579	66318	65781	26228	25361	23312	25299	26499	24376	9311	8000	8359	8087	7913	7965	7382	7646	7789	8040	7996	8255	19826	18286	16566	15188	16090	15048	7441	7532	15447	7729	7792	7684	8309	8208	7936	8097	7951	7628		12.0542	16900	15308	14124	10681	9665	11772	11883	10479
12.1	55813	66534	67382	26140	25333	22954	25453	26470	24481	9257	7751	8341	7850	7747	7956	7699	7859	7746	7865	7600	8066	20148	18283	16525	15242	15669	15338	7639	7498	15521	7758	7814	7651	8203	7890	8148	8136	8180	7716		12.1	16434	15361	14208	10569	9864	11676	11707	10539
12.1458	55436	66906	66415	26268	25184	23487	25867	26942	24632	9327	7982	8470	7621	7877	7860	7453	7636	7885	7811	7946	8135	19915	18149	16594	15315	15852	15549	7497	7706	15922	7607	7844	7528	8039	7997	8098	8082	7726	7605		12.1458	16509	14917	13911	10643	9473	11738	11741	10575
12.1917	55410	65909	66801	26076	24902	23868	25375	26150	24136	9267	7839	8395	7770	8059	8020	7689	7736	7644	7939	7840	8191	19510	18062	16466	15340	15663	15221	7537	7453	15597	7603	7890	7700	7858	8028	7836	8207	8088	7757		12.1917	16833	15149	14325	11139	9516	11823	11761	10437
12.2375	55404	65723	66469	26161	25029	23431	25602	26660	24200	9424	8009	8488	7907	7626	8019	7343	7732	7945	7759	7927	8182	19912	18343	16525	15540	16035	15018	7486	7791	15571	7631	7816	7674	8083	8050	7774	7932	8045	7876		12.2375	16222	14840	14386	10743	9363	11570	12022	10433
12.2833	55754	65451	65737	25675	25232	23569	25660	26666	24670	9335	8009	8267	7797	7791	7807	7563	7668	7635	8076	7849	8271	19937	18074	16462	15235	15840	15163	7535	7718	15312	7334	7947	7544	7813	7880	8153	8013	8197	7459		12.2833	16491	15235	14383	10733	9463	11841	11617	10432
12.3292	55638	66057	66734	26113	25615	23655	25589	26612	24260	9586	7679	8441	7842	7676	8093	7606	7785	7706	8083	7964	8111	20040	18448	16472	15297	15781	15268	7739	7633	15662	7643	7883	7737	7990	8099	7997	8112	7847	7459		12.3292	16519	15129	14676	10837	9426	11996	11671	10799
12.375	54861	66437	66798	26127	25168	23300	25863	26635	24596	9777	7845	8496	7816	7886	7813	7644	7580	7833	7738	7761	8313	20444	18219	16307	15303	15988	15101	7571	7464	15461	7635	7787	7618	7952	8146	7984	8055	7846	7647		12.375	16464	15081	14054	10769	9490	11788	11937	10239
12.4208	55792	66170	66526	26622	25691	23095	25580	26758	24699	9270	7976	8644	8149	7754	7768	7389	7744	7672	7717	7975	7976	19736	18286	16650	15187	15689	15012	7555	7437	15553	7578	7899	7633	8169	7908	7950	7967	8149	7739		12.4208	16672	15062	14054	10873	9338	12014	11724	10443
12.4667	55928	65928	66387	26852	24999	23866	25917	26867	24635	9699	7677	8487	7884	7815	7856	7448	7665	7828	7597	7909	8065	20175	17891	16615	15150	16052	14993	7376	7740	15881	7810	8110	8057	8039	8059	8024	8115	8203	7521		12.4667	16846	15251	13992	10655	9758	11556	11671	10695
12.5125	55570	66498	66549	26397	25259	23757	26036	26902	24416	9651	7783	8591	7614	7861	8075	7594	7709	7668	7810	7711	8208	20149	18095	16404	15278	15745	15215	7637	7317	15508	7829	7684	7501	8163	8199	8121	7909	8189	7650		12.5125	16558	15335	14620	11008	9485	12108	11876	10622
12.5583	55983	66140	66957	26731	25194	23767	25625	26608	24039	9514	7924	8602	7802	7818	7945	7466	7726	7732	7709	7784	8129	20318	18099	16551	15145	15769	15098	7669	7742	15494	7864	8047	7650	8250	8234	7809	8063	8140	7681		12.5583	16864	15086	14654	10646	9574	11914	11694	10600
12.6042	55797	66531	67500	26621	25202	23885	25942	26698	24754	9526	7889	8500	7859	7743	7728	7427	7676	7716	7838	8000	8120	20438	17706	16844	15462	15676	15275	7787	7637	15713	7712	7865	7543	8095	7994	7830	8083	8184	7801		12.6042	16692	14961	14371	10680	9754	11782	11635	10493
12.65	55643	65920	67162	26780	25236	23495	25750	26819	24441	9775	7759	8585	7884	7742	7822	7593	7800	7423	7874	7678	8032	20146	18221	16512	15608	16033	15511	7584	7505	15785	7420	7784	7742	8131	8023	8076	8161	8076	7675		12.65	17024	15184	14331	10768	9403	11921	11686	10313
12.6958	56457	66443	66965	26420	25342	23889	25849	26392	24414	9541	8076	8514	7806	7945	7962	7495	7819	7849	7789	7793	8085	20279	18489	16398	15485	16158	15146	7636	7479	15701	7518	7870	7696	7997	7991	7959	8138	7940	7755		12.6958	16472	15029	14195	10843	9466	11812	11683	10443
12.7417	55739	66499	66969	26725	25328	23286	25950	26670	24413	9746	7729	8510	7784	7763	8017	7456	7590	8026	7723	7512	8142	20329	17955	16450	15301	15751	15201	7675	7680	15559	7637	8085	7513	8195	7929	8091	8185	8007	7905		12.7417	16684	15048	14098	10705	9467	12036	11551	10502
12.7875	55900	66449	67079	26500	25260	23600	25878	26739	24634	9609	7863	8618	7807	7735	8059	7659	7599	7764	7678	7818	8207	19616	18263	16762	15295	16001	15051	7566	7489	15949	7523	7896	7539	8184	8034	8101	7978	7807	7718		12.7875	16735	14964	14035	10758	9365	12094	11539	10639
12.8333	56225	66921	66984	26827	25522	23377	25492	26618	24464	9940	7660	8475	7685	7719	7805	7488	7849	7747	7716	7858	8232	20123	18485	16512	15248	15786	14826	7741	7544	15682	7769	8130	7617	8410	8021	7983	7975	8252	7715		12.8333	16791	15197	14203	10687	9369	11831	11846	10338
12.8792	55235	67188	66495	26764	24945	23602	25962	26994	24537	9619	7870	8779	7701	7758	7784	7516	7694	7883	7851	7881	8087	20023	18457	16376	15419	15583	15148	7576	7769	15830	7518	7948	7670	8017	8026	8070	8124	8138	7587		12.8792	16515	15050	14292	10857	9496	11831	11485	10195
12.925	55780	66646	66751	26352	25286	23335	25861	27043	24403	9687	7791	8507	7893	7895	7775	7449	7516	7761	7774	7872	8134	20353	17961	16723	15159	15955	15109	7807	7601	15524	7752	7937	7598	8417	7900	8038	8043	7971	7586		12.925	16672	15234	14142	10755	9287	11982	11550	10145
12.9708	55090	66366	66655	26797	24938	23862	25146	26966	24329	10022	7952	8548	7890	7871	7890	7391	7610	7771	7767	7903	8199	20078	17987	16379	15412	15851	14918	7514	7668	15858	7533	7983	7639	8012	8041	8100	8082	7895	7923		12.9708	16783	15475	14158	10650	9460	11898	11566	10229
13.0167	56073	66696	67401	26578	25015	23029	26164	26865	24871	9793	8151	8816	7570	7746	8042	7338	7785	7597	7781	7984	8120	20538	18008	16682	15268	15937	15353	7630	7600	15888	7647	8059	7675	8274	8201	8234	8365	7982	7616		13.0167	16620	15072	14079	10934	9464	11955	11650	10589
13.0625	55834	66726	66510	26753	25493	23533	25928	26901	24555	9950	7758	8898	7898	7870	7881	7552	7603	7784	7642	7916	7981	20152	17996	16788	14984	15507	14960	7737	7634	15713	7447	8097	7569	8097	8115	8154	8174	8104	7607		13.0625	16500	15014	14322	10886	9339	11864	11216	10426
13.1083	55868	66685	66848	27132	25153	23530	26280	27074	24586	9786	7855	8679	7830	7790	7944	7561	7776	7935	7684	7827	8084	20126	18252	16466	14889	15745	15033	7542	7639	15762	7646	7794	7398	8202	7950	8315	7886	7959	7683		13.1083	16573	15148	14233	11028	9572	12220	11761	10478
13.1542	56326	66736	66555	26854	25506	23658	25807	26887	24322	10047	7835	8632	7698	7620	7861	7622	7793	7709	7665	7863	7996	19937	18022	16511	15107	15732	15174	7675	7613	15884	7598	7830	7470	8039	8217	7905	7991	8032	7732		13.1542	16835	15169	14475	10702	9282	11954	11902	10346
13.2	55611	66155	67063	26745	25160	23505	25992	27409	24437	9963	7857	8935	7845	7875	7970	7625	7577	7766	7789	7897	8005	20077	18264	16361	15414	15774	15128	7512	7864	15692	7775	7787	7534	7978	7998	7873	7962	7865	7558		13.2	16953	15391	14388	10771	9468	11904	11797	10553
13.2458	56316	66191	66477	27117	25496	23630	25932	26771	24458	9823	7927	8716	7911	7629	7865	7625	7708	7678	7548	7821	8143	20056	18465	16690	15398	16053	14914	7714	7615	15861	7664	8116	7631	8287	8106	7994	8127	7957	7657		13.2458	16705	15302	14467	11060	9490	11997	11623	10676
13.2917	55889	66284	66671	27474	25256	23244	25825	27144	24681	10065	7739	8918	7745	7868	7865	7679	7839	7716	7962	7765	8251	19730	17973	16477	15176	15685	15101	7592	7792	15761	7455	7960	7646	8162	8069	7992	8164	8239	7570		13.2917	16949	15229	13887	10909	9380	12234	11820	10419
13.3375	56034	66365	66027	27564	25301	23481	26002	27022	24416	10156	7921	8638	7716	7868	7903	7550	7674	7608	7870	7743	7946	20009	18023	16303	15162	15982	15193	7468	7660	15895	7647	8092	7881	7988	7842	7999	7998	8067	7676		13.3375	16634	15161	14045	10742	9321	12116	11585	10538
13.3833	55742	66455	65947	27668	25575	23453	25795	26732	24208	10087	7586	8891	7901	7611	7908	7699	7932	7630	7720	7880	8274	19889	18100	16612	15459	15752	15213	7502	7373	16015	7519	7880	7499	8278	8232	8003	8069	8314	7673		13.3833	16295	14858	14172	10890	9598	12150	11563	10347
13.4292	55255	67105	66735	27125	25213	23693	26436	26741	24412	10271	7882	9082	7648	7867	7719	7577	7727	7824	7968	7921	7925	20065	18332	16834	15252	15772	15128	7526	7752	16094	7521	8201	7549	8001	8247	8184	8061	7939	7485		13.4292	17006	15226	14238	10755	9482	11988	11596	10425
13.475	55784	66903	66687	27299	25029	23137	26188	27029	24536	10303	7791	8790	7800	7810	7656	7652	7584	7826	7794	7544	8062	20212	18543	16240	15397	15865	15143	7505	7764	15868	7401	7881	7499	7944	7990	8272	7992	7879	7719		13.475	16578	15167	14252	10796	9248	11940	11443	10321
13.5208	55609	65917	66412	27421	25742	23414	26237	27049	24585	10421	7840	9055	7880	7896	7974	7594	7702	7731	7790	7956	8066	20286	17900	16259	15133	15541	15494	7251	7860	15985	7780	7846	7491	8282	7944	7832	8036	8098	7735		13.5208	16650	14908	14242	10584	9220	12065	11642	10454
13.5667	55143	66231	66991	26987	25076	23248	25892	26768	24281	10384	7848	9011	7751	7847	7910	7487	7858	7687	7677	7835	8026	20039	18126	16825	15350	15906	15094	7679	7741	16076	7509	7913	7568	8203	8009	7959	8013	8029	7692		13.5667	16880	15234	13944	10841	9343	12042	11358	10560
13.6125	55713	66385	66494	27149	25097	23438	26041	27079	24654	10358	7744	8891	7610	7816	7762	7280	7682	7638	7630	7828	8049	20232	18010	16489	15586	15680	14897	7552	7652	16028	7563	7900	7564	8435	8032	7962	7862	8368	7686		13.6125	16793	15141	14060	10619	9313	11872	11752	10642
13.6583	55334	66426	67001	27727	25537	23049	25838	27302	24520	10253	7920	8919	7864	7846	7897	7445	7684	7703	7854	7660	8158	19810	18319	16486	15312	15848	15118	7462	7507	16106	7530	7766	7629	8416	7946	7979	7996	8107	7687		13.6583	16507	15052	14403	10731	9478	12101	11675	10663
13.7042	56361	66103	67148	27208	25405	23511	25747	26881	24597	10504	7884	9077	7782	7813	8153	7683	7758	7563	7621	7784	8199	19873	18149	16469	15253	15574	15145	7488	7567	16074	7524	7815	7496	8314	7873	8046	7937	7926	7624		13.7042	17033	15362	14167	10975	9456	11924	11911	10562
13.75	56075	66432	66729	27519	25357	23673	25915	26873	24736	10345	7815	9161	7636	8041	7980	7450	7657	7591	7610	7644	8040	20127	18255	16724	15488	15777	14955	7318	7712	15920	7448	7865	7664	8286	7895	8063	8032	8100	7872		13.75	16933	15456	14456	10717	9425	12110	11592	10499
13.7958	55650	66388	66590	27482	25046	23217	25900	26878	24901	10416	8022	8927	7652	7972	7815	7277	7629	7722	7615	7793	7926	20478	18116	16550	15100	15825	15085	7627	7729	16124	7517	7861	7543	8135	8026	8063	8165	8036	7618		13.7958	16780	14991	13987	10712	9401	11901	11760	10515
13.8417	55793	66272	66610	27617	25149	23385	26007	26981	24774	10326	8033	9082	7776	7813	8039	7507	7673	7676	7768	8040	8231	20160	17911	16827	15149	15807	15205	7410	7765	15864	7611	8061	7501	8130	8104	8144	8164	7988	7709		13.8417	16605	14720	14426	10676	9276	12117	11928	10676
13.8875	56271	66702	66945	27647	25075	23626	25812	27235	24777	10695	8084	9211	7909	7931	7717	7641	7826	7961	7614	7948	8060	20373	18109	16800	15259	15924	15135	7526	7661	16071	7569	7862	7447	8080	8162	7943	7956	7829	7563		13.8875	16461	15187	14207	10666	9605	12082	11898	10236
13.9333	55179	66019	66133	28050	25675	23380	26226	26698	24486	10477	8066	9205	7798	7851	7709	7583	7548	7556	7782	7836	8218	20352	18055	16910	15081	15999	15177	7480	7963	16397	7686	7826	7739	8221	7857	8104	7933	7934	7545		13.9333	16865	15328	14397	10833	9327	11866	11670	10410
13.9792	55711	66065	66337	27764	25649	23566	26279	27116	24685	10406	7902	9364	7614	7741	7787	7640	7711	7608	7876	7732	7913	20364	18435	16589	15284	15797	14853	7622	7771	16044	7393	7928	7530	8120	7859	8171	7994	8032	7547		13.9792	16941	15532	14444	10902	9393	12214	11761	10600
14.025	55792	66019	65902	27324	24943	23428	26085	26653	24805	10856	8073	9089	7732	7633	7703	7460	7572	7580	7752	7776	8049	20008	18170	16454	15321	15876	15215	7515	7719	16222	7636	7839	7477	8331	7929	8010	7967	8005	7490		14.025	16979	15106	14096	10624	9454	12067	11901	10366
14.0708	55966	66030	66196	27215	25493	23688	25833	27068	24563	10530	7989	9260	7836	7481	7982	7551	7803	7756	7910	8037	8282	20458	18156	16657	15001	16022	15243	7707	7965	15922	7508	7797	7706	8212	8083	7954	8006	7894	7477		14.0708	16668	15010	14364	10871	9589	12083	11967	10639
14.1167	55684	66392	66067	27933	24950	23681	26031	27387	25228	10628	8173	9515	7618	7757	7710	7256	7545	7834	7611	7848	7905	20148	18356	16589	15301	16115	15037	7725	8029	15821	7618	8115	7527	8304	7939	7977	8006	7935	7740		14.1167	16445	15124	14266	10576	9436	12122	11640	10339
14.1625	55300	66325	66848	27911	25550	23677	26434	26878	24699	10589	7934	9468	7870	7823	7758	7561	7604	7744	7597	7941	7983	20137	18248	16403	15150	15606	14914	7348	7664	15896	7462	7908	7500	8251	7860	8144	8146	7932	7568		14.1625	16570	15198	14251	10980	9340	11809	11526	10382
14.2083	55612	66641	66496	27681	25641	23488	25687	27346	24296	10511	7982	9390	7617	7704	7964	7446	7581	7591	7525	7897	7950	20008	17828	16704	15162	15674	14935	7706	7887	15816	7674	7962	7745	8065	8189	7899	7895	8012	7488		14.2083	16418	15306	14009	10881	9468	11869	11566	10431
14.2542	56281	66902	66732	27313	25477	23285	26034	27265	24359	10779	7990	9481	7853	7660	7903	7431	7669	7650	7715	7877	8164	20362	18385	16888	15137	15719	15263	7468	7849	16034	7526	7937	7519	8347	8098	7891	7942	8211	7586		14.2542	16956	15196	14202	11077	9384	12041	11542	10331
14.3	55994	66136	66803	27541	25336	23599	25767	27079	24519	10827	7990	9523	7861	7890	7862	7572	7565	7598	7835	7772	8214	19881	18410	16562	15380	15705	15097	7416	7727	16568	7568	7745	7655	8193	7943	7964	7971	8270	7842		14.3	16620	15112	14097	10723	9438	12108	11723	10339
14.3458	55401	66664	67042	27508	25380	23624	26039	27043	24729	10699	8149	9209	7579	7747	7905	7504	7913	7672	7779	7725	8172	20445	18149	16281	15308	15903	14944	7512	7999	15840	7476	8100	7604	8180	7912	8073	7946	8185	7664		14.3458	16768	15170	14527	10555	9303	11778	11941	10509
14.3917	55291	66244	66516	27653	25629	23494	26049	27568	24435	10782	8116	9636	7767	8038	7884	7371	7844	7582	7677	7812	7915	20204	17861	16376	15243	15914	15297	7626	7950	16034	7665	7813	7637	8074	8130	8000	8030	7858	7646		14.3917	16582	15116	13892	10673	9463	11917	11645	10588
14.4375	55600	66813	66118	27518	25327	23315	25745	27050	24660	10737	8110	9775	7627	8033	7812	7448	7747	7700	7704	7840	8014	20088	18237	16394	15074	15645	15367	7499	8017	16274	7739	8261	7647	8271	8001	7924	7887	7949	7521		14.4375	16873	15133	14165	10614	9537	11871	11726	10458
14.4833	55530	66282	65995	27504	25421	23347	25997	26845	24269	10830	7944	9677	7586	7901	7909	7584	7638	7739	7771	7835	8158	20175	18127	16480	15287	15828	14981	7555	7609	16005	7635	7847	7665	8304	7994	8054	7991	8206	7549		14.4833	16349	15241	14000	10768	9054	11796	11641	10171
14.5292	55151	66415	66294	27475	25291	23500	25977	26839	24413	11080	8110	9558	7723	7872	7823	7275	7554	7738	7810	7873	8269	20439	18246	16182	15112	15545	15298	7498	7940	16117	7435	7869	7787	8231	8020	8007	7923	7972	7592		14.5292	16696	15123	13905	10870	9589	11893	11771	10222
14.575	55795	66050	66895	27517	25349	23673	26229	26932	24469	10784	8132	9699	7771	7687	7739	7397	7667	7833	7737	7858	8197	20302	18203	16342	15335	15513	15016	7401	7940	16007	7544	7950	7643	8169	7996	8226	7880	8077	7760		14.575	16839	15392	14424	10993	9364	12094	11340	10373
14.6208	55735	67099	66418	27588	25153	23292	26747	27208	24361	11101	8285	9596	7764	7636	7963	7538	7664	7688	7775	7717	8159	20437	18205	16596	15052	15452	15157	7470	7781	15983	7452	7800	7477	7951	8133	8096	7978	8059	7584		14.6208	16737	15135	14040	10705	9591	11837	11548	10567
14.6667	55586	66527	66209	27821	25237	23618	26306	27166	24756	11120	7965	9793	7776	7783	7845	7633	7557	7555	7710	7960	8031	20222	18315	16588	15073	15625	15030	7293	8081	16146	7579	7979	7492	8199	7969	8116	7665	8140	7498		14.6667	16665	15201	14156	10873	9400	11884	11788	10269
14.7125	55229	66585	65823	28310	25265	23731	25855	27024	24855	10852	8350	9871	7535	7736	7944	7496	7765	7738	7481	7793	8177	19755	18078	16815	15229	15512	14850	7651	8180	16293	7819	7668	7771	8319	8155	8093	8076	7989	7683		14.7125	16533	15331	14331	10771	9145	11947	11483	10348
14.7583	55380	66477	66712	27970	24902	23697	26600	26950	24692	10951	8378	9557	7779	7514	7956	7287	7726	7557	7656	7621	8164	20415	18251	16593	15116	15790	15455	7628	8007	16218	7585	7860	7585	8256	8110	8121	8053	8037	7724		14.7583	16718	15383	14058	10966	9318	12104	11381	10468
14.8042	54726	66512	66526	27726	25412	23588	26078	27209	24524	11060	8233	9585	7900	7885	7870	7630	7602	7494	7693	7751	8028	20013	18058	16251	15151	15913	15093	7548	7878	16162	7520	7896	7557	8167	8074	8138	7927	8017	7317		14.8042	16797	15157	14370	10777	9374	12121	11311	10566
14.85	55168	65942	66775	27712	25182	23235	26257	27296	24774	10975	8113	9692	7753	7897	7920	7475	7644	7865	7635	7881	8312	19924	18246	16591	15170	15479	15167	7645	8150	16460	7467	7857	7460	8243	7922	7713	7812	7978	7595		14.85	16673	15400	14162	10735	9153	11859	11475	10347
14.8958	55638	66039	66121	27781	25599	23521	26078	27447	24534	11076	8314	9725	7757	7809	8084	7485	7558	7485	7815	7847	8096	20065	18275	16524	15352	15784	15400	7492	8140	16481	7750	7927	7577	8205	7779	7972	7995	8033	7535		14.8958	16764	15074	14353	10696	9452	12049	11624	10510
14.9417	55060	65969	67027	27420	25716	23377	26078	27120	24862	11166	8199	9749	7549	7716	7706	7618	7697	7705	7644	7657	8068	20168	18445	16635	15084	15330	15066	7655	8000	16350	7429	8029	7474	8053	8005	8006	7896	8141	7833		14.9417	16763	15264	14105	10804	9383	11743	11586	10439
14.9875	54948	65770	66447	27622	25405	23604	26154	27285	24910	11093	8430	9815	7506	7653	7819	7766	7724	7915	7762	7708	8246	20118	18019	16750	15184	15403	15093	7486	7979	16557	7623	7845	7662	8294	8001	8268	8044	8015	7678		14.9875	16729	15092	14291	10607	9224	11910	11721	10585
15.0333	55298	66743	66752	27292	25554	23653	25920	27359	24847	11076	8240	9903	7776	8002	7809	7570	7703	7757	7669	7836	8015	20166	18179	16652	15358	15460	14921	7547	8134	16166	7581	7960	7732	8013	7897	7909	7917	7985	7423		15.0333	16578	15499	14033	10778	9374	11609	11550	10475
15.0792	55413	67274	66539	27717	25219	23841	26012	26812	24828	11180	8283	9982	7849	7763	7960	7366	7676	7654	7687	7864	8024	20371	18041	16221	15078	15805	15095	7442	7946	16525	7651	8062	7319	8245	8050	7903	8131	7975	7599		15.0792	16690	15048	13985	10888	9217	12283	11389	10315
15.125	55547	66454	66258	28137	25575	23690	26025	27303	24551	11405	8508	9987	7689	7503	7649	7518	7650	7682	7762	7884	8179	20488	18081	16784	15189	15746	15089	7568	8020	16198	7679	8087	7668	8178	7784	8031	7988	8151	7577		15.125	16699	15114	14345	10730	9414	12082	11599	10687
15.1708	54998	66648	66568	27161	25682	23452	26166	26941	24477	11483	8560	9916	7683	7752	7877	7927	7570	7692	7610	7510	8195	20253	17867	16568	15372	15536	14905	7356	8367	16287	7484	7708	7545	8221	8185	7875	8101	8028	7613		15.1708	16809	15111	13965	10728	9234	11997	11674	10254
15.2167	54827	66937	66136	27585	25520	23579	26159	26930	24686	11324	8407	9882	7821	7872	8086	7364	7690	7591	7773	7695	8004	20313	17877	16429	15509	15536	14636	7526	8113	16828	7437	7894	7669	8083	7844	7646	8049	8110	7429		15.2167	16598	14934	14249	10720	9075	11867	11623	10289
15.2625	54461	66657	66299	28317	25442	23461	26500	27428	24624	11023	8558	10044	7771	7849	7864	7420	7798	7865	7572	7683	8138	20272	18135	16368	15065	15645	14931	7361	8159	16468	7649	7944	7580	8250	7751	8107	7791	8151	7726		15.2625	17025	14901	14364	10650	9270	12273	11708	10554
15.3083	55522	66281	66573	28289	25809	23799	26173	27320	24587	11309	8866	10017	7769	7645	7834	7244	7701	7507	7727	7809	7991	20518	18098	16411	15115	15727	15012	7458	8236	16644	7615	7773	7646	8107	8179	7930	7890	7987	7794		15.3083	16941	15211	14279	10585	9429	11871	11602	10705
15.3542	55457	66091	66599	27663	25782	23971	26226	27722	25158	11408	8645	10094	7962	7755	7924	7619	7700	7498	7878	7602	8214	20513	18287	16508	15477	15635	15105	7509	8148	16312	7425	7950	7605	8446	7981	8021	8029	8101	7632		15.3542	16594	15216	14286	10854	9366	12207	11813	10251
15.4	55634	65918	66698	28048	25377	23269	26536	26662	24605	11373	8607	10235	7680	7735	7905	7758	7523	7641	7526	7797	8208	20217	17843	16588	15415	15657	15249	7461	8185	16273	7731	7877	7561	8041	8112	8219	8025	7850	7668		15.4	17252	15032	14262	10659	9506	12103	11684	10405
15.4458	55251	65684	66024	27755	25786	23337	26333	27064	24726	11180	8497	10289	7859	7809	7924	7491	7619	7808	7544	7776	7943	20690	17826	16168	15185	15506	15068	7711	8015	16414	7470	7838	7747	8122	8150	7917	7842	8053	7743		15.4458	16956	15050	14383	10743	9191	12172	11462	10425
15.4917	55350	66825	66521	27619	25167	23136	25688	26891	25030	11473	8437	10256	7688	7636	7680	7464	7610	7582	7812	7694	8068	20019	17787	16288	15451	15570	14996	7464	8182	16645	7362	7992	7492	7854	8121	7852	8049	8007	7330		15.4917	16842	15261	14299	10561	9404	12003	11806	10548
15.5375	54983	66788	66057	28054	25981	23477	26081	27235	24756	11426	8502	10303	7858	7705	7726	7583	7425	7699	7359	7620	8190	20058	17797	16547	15223	15613	14924	7599	8168	16378	7487	7970	7583	8181	8090	8051	8149	7778	7515		15.5375	17007	15049	14162	10692	9335	11924	11430	10406
15.5833	54733	66785	66238	27677	25382	23461	25862	27508	25283	11423	8747	10291	7578	7909	7926	7239	7792	7503	7663	7813	7921	19748	17745	16318	15166	15296	15298	7574	8209	16630	7543	7892	7592	8045	7913	7993	7879	7984	7533		15.5833	16651	15083	14363	10605	9314	12071	11671	10587
15.6292	54357	66373	66462	27632	25532	22971	25868	27096	24749	11530	8566	10282	7783	7489	7819	7411	7527	7670	7830	8009	7977	19973	17867	16628	15038	15847	14789	7607	8016	16640	7553	7829	7494	8063	7765	8058	7875	8018	7536		15.6292	16619	15056	13939	10491	9134	12213	11625	10187
15.675	54648	66095	66056	27600	25420	23232	26172	27133	25071	11483	8850	10585	7739	7642	7940	7563	7487	7632	7723	7824	7962	19881	18053	16249	15146	15219	14935	7581	8315	16313	7430	7900	7677	8033	7995	7939	8314	8030	7594		15.675	16817	14828	14035	10564	9373	12140	11677	10303
15.7208	55136	66041	66040	27723	25618	23985	26258	27211	24764	11479	8633	10378	7727	7683	7662	7374	7591	7462	7742	7814	8052	20254	18133	16661	15146	15610	15190	7551	8251	16550	7460	7702	7648	8128	7952	7870	7998	7986	7294		15.7208	16927	15104	14510	10677	9091	11945	11718	10254
15.7667	54638	66699	66474	28034	25521	23607	25974	27071	24683	11331	8695	10467	7596	7755	7629	7381	7754	7735	7765	7710	8184	20498	18241	16239	14928	15424	15278	7488	8210	16291	7473	7798	7569	8189	7909	8010	7692	8023	7359		15.7667	16619	15078	14332	10749	9421	12291	11903	10386
15.8125	54283	66072	65555	28220	25344	23902	26275	27199	24902	11540	8715	10616	7653	7670	7762	7575	7557	7787	7749	7749	7761	20190	18020	16650	14986	15766	14960	7379	8059	16313	7332	7801	7324	8202	7944	8000	7835	8064	7490		15.8125	16512	14972	14165	10780	9363	12020	11608	10511
15.8583	55369	66859	65895	27876	25258	23543	26501	27462	25088	11678	8786	10444	7736	7726	7923	7403	7478	7619	7851	7857	8149	20214	18335	16240	15251	15571	15005	7663	8215	16210	7811	7756	7600	8032	8036	7973	8210	8022	7544		15.8583	16633	15464	14333	10778	9275	12114	11640	10382
15.9042	55241	66161	66406	27744	25345	23490	26093	27133	25233	11456	9036	10287	7614	7973	7835	7405	7869	7761	7524	7812	7742	20203	18047	16783	15373	15750	15333	7466	8135	16486	7540	7872	7520	8242	7936	7879	7849	7894	7581		15.9042	16980	15087	14083	10932	9417	11987	12114	10463
15.95	54506	66067	65547	28222	25276	23937	26143	27173	24583	11619	8862	10458	7743	7902	7911	7502	7642	7454	7572	7965	8102	20379	17839	16324	15392	15603	15062	7575	8128	16277	7419	7824	7820	7974	7785	7923	7897	7973	7696		15.95	16703	15295	14271	10719	9511	12082	11749	10643
15.9958	55188	66587	66367	28289	25826	23507	26107	26820	24901	11530	8754	10554	7471	7548	7938	7514	7652	7611	7799	7826	8008	20334	18199	16543	15413	15485	15038	7594	8349	16293	7546	7775	7784	8186	7958	8031	8035	8119	7572		15.9958	16710	15295	14532	10906	9295	12298	11623	10370
16.0417	55337	66063	66401	28206	25017	23639	26348	27688	24806	11714	9006	10469	7530	7568	7928	7621	7635	7424	7959	7721	8006	20240	17840	16645	15062	15858	14921	7545	8401	16627	7396	7901	7619	7785	7975	7906	7955	8054	7507		16.0417	16827	15151	14302	10868	9393	12108	11827	10682
16.0875	55180	66054	66418	28231	25395	23681	26038	27246	25066	11611	8884	10590	7843	7733	7803	7224	7597	7582	7645	7709	8162	20193	18050	16322	15214	15434	15262	7576	8411	16879	7721	7827	7808	8016	7998	8053	8210	8017	7510		16.0875	16967	15036	14176	10795	9426	11888	11710	10416
16.1333	54822	66056	66851	28489	25892	23543	26252	27231	24941	11830	9004	10478	7627	7423	7715	7465	7610	7826	7577	8001	7868	20023	17738	16231	15247	15749	14987	7544	8444	16591	7402	7578	7686	8025	7995	7915	7849	8145	7723		16.1333	16474	14976	14235	10724	9302	12082	11543	10492
16.1792	54628	66297	66644	27864	25744	23627	25817	27212	24755	11878	9169	10743	7953	7763	7887	7417	7651	7689	7809	7892	8086	20511	18069	16335	15275	15695	15322	7579	8352	16695	7317	7959	7539	8171	8025	7965	8069	8076	7332		16.1792	16744	15110	14161	10435	9272	11942	11639	10419
16.225	54756	66430	66148	27926	25607	23594	26365	27104	25250	11902	9158	10520	7741	7833	7810	7265	7825	7543	7726	7697	8121	20227	17895	16438	15334	15708	15133	7583	8266	16875	7748	7922	7408	8288	7924	7887	8092	7997	7474		16.225	16821	15146	13958	10739	9340	11898	11795	10582
16.2708	55164	66824	65986	28030	25534	23513	26130	27207	24865	11826	9015	10792	7682	7826	7822	7538	7572	7538	7863	7860	8106	20329	18229	16480	15191	15366	15173	7243	8474	16847	7448	7811	7579	8284	8215	8140	7968	7876	7611		16.2708	16655	15471	14484	10939	9581	11807	12012	10582
16.3167	53701	66746	66163	28122	25234	23615	26405	27431	25155	11728	9250	10648	7770	7707	7646	7445	7860	7543	7626	7692	7969	19886	17946	16355	14968	15516	15221	7764	8667	16704	7444	7850	7411	8115	7919	7942	8009	7964	7750		16.3167	16620	15072	14327	10574	9519	11576	11673	10549
16.3625	54782	66420	65566	28426	25470	23430	26300	27007	25292	11700	9245	10814	7819	7806	7900	7389	7567	7565	7460	7885	7959	20350	18118	16453	14778	15637	15277	7702	8557	16536	7447	7819	7685	8073	8090	8037	7775	8153	7555		16.3625	17070	15073	14130	10431	9264	11849	11403	10474
16.4083	55369	66647	65913	27689	25460	23345	26108	27096	25062	11666	9112	10902	7833	7758	7864	7472	7736	7742	7888	7660	7811	20428	18412	16595	15097	15498	14902	7497	8355	16785	7709	7844	7647	8246	8065	8088	8089	8039	7561		16.4083	16725	15040	14176	10761	9642	11956	11653	10610
16.4542	55233	66046	66881	28327	25612	23607	26416	27168	25334	11868	9416	10950	7553	7659	7776	7235	7579	7564	7748	7793	7860	20337	17597	16183	15005	15562	15043	7494	8547	16473	7504	7968	7516	8001	7802	8216	8060	7971	7430		16.4542	16862	15263	14032	10782	9417	12040	11742	10539
16.5	55568	67174	66578	28046	25536	23480	26329	26860	25188	12051	9382	11007	7583	7418	7778	7500	7456	7551	7560	8024	8029	20390	17945	16332	14880	15505	15096	7602	8413	16770	7490	7958	7629	8016	8015	7931	7964	8064	7566		16.5	16743	15140	14157	10469	9321	11777	11517	10514
16.5458	55185	66395	66062	27870	25452	23627	25898	27418	24991	11737	9345	11054	7650	7807	7787	7237	7430	7636	7756	7716	8168	20791	18242	16184	15476	15304	15055	7529	8562	17070	7440	7995	7608	8219	8017	7756	8166	7974	7533		16.5458	17026	15365	14291	10897	9558	11857	11733	10407
16.5917	54546	66673	65826	27900	25652	23545	25952	26987	25053	11970	9386	10803	7754	7437	7863	7485	7632	7445	7467	7658	7897	20305	17931	16510	15025	15708	15160	7495	8392	16836	7367	7994	7324	7997	8047	8065	8020	7666	7497		16.5917	16902	15270	14103	10816	9389	11861	11675	10097
16.6375	55165	66789	66028	27882	25837	23419	25775	27235	24708	11859	9443	11186	7592	7659	7697	7297	7689	7646	7605	7942	7993	19908	17871	16427	15142	15702	14988	7683	8507	16714	7525	7750	7595	8181	7918	8047	7945	7899	7672		16.6375	17177	15124	14004	10639	9348	11925	11500	10387
16.6833	54800	66980	66019	27591	25846	23550	25765	27153	25235	11836	9497	11336	7538	7614	8140	7480	7475	7626	7730	7810	7847	20329	18099	16324	15027	15453	15074	7484	8580	16414	7505	7995	7549	8316	8075	8086	7940	8059	7456		16.6833	16479	15126	14182	10743	9296	11827	11809	10368
16.7292	54463	65747	65689	28381	25970	23421	26767	27090	25218	12303	9460	11144	7700	7553	7876	7331	7630	7645	7523	7779	8129	20590	18239	16500	14968	15418	14752	7502	8545	16385	7408	7842	7332	8026	7910	7913	7906	7769	7730		16.7292	16813	15378	14137	10699	9395	12142	11860	10521
16.775	54136	66760	66293	28005	25365	23714	26559	26971	24892	12220	9512	11354	7563	7521	7898	7439	7368	7693	7723	7719	7924	20266	18013	16565	15120	15394	15011	7328	8372	16457	7486	7842	7455	8105	7962	8016	8113	8013	7691		16.775	16712	14904	14168	10758	9226	11759	11700	10140
16.8208	54808	66821	65447	27970	25478	23691	26449	26708	25442	12017	9555	11247	7644	7692	7760	7490	7811	7726	7900	7653	7924	20181	18265	16484	15319	15444	15055	7739	8453	16889	7544	7953	7538	8227	7728	8001	7927	7821	7419		16.8208	16650	15085	14463	10643	9390	11724	11645	10268
16.8667	55650	66003	66165	28061	25316	23327	26301	27317	25024	11898	9272	11530	7633	7662	8054	7526	7657	7511	7648	7833	8251	20266	17633	16355	15031	15441	15034	7615	8735	16515	7579	7726	7541	7870	8143	7913	7858	8241	7633		16.8667	16593	15050	14147	10511	9103	11710	11570	10208
16.9125	55495	66760	65647	27953	25809	23832	25786	27040	25480	12147	9575	11257	7809	7719	7855	7463	7698	7456	7740	7838	8130	20013	17921	16399	15174	15542	15006	7667	8713	16577	7569	7705	7636	8266	8157	7998	8099	8211	7502		16.9125	16971	15189	14102	10766	9492	11527	11715	10511
16.9583	54982	66554	66098	28185	25545	23809	26257	26725	25575	12074	9557	10752	7547	7701	7934	7505	7314	7737	7500	7866	8141	20104	18087	16187	15067	15205	14894	7584	8481	16508	7382	7686	7476	8094	7957	8059	8206	8012	7583		16.9583	16517	15066	14177	10624	9347	11946	11533	10319
17.0042	54606	65717	65891	28212	25620	24023	26173	27297	25504	12183	9458	11382	7727	7471	7964	7453	7577	7644	7530	7684	7941	20553	18240	16125	15271	15375	15014	7835	8733	16939	7295	7987	7646	8202	7808	7952	7912	8022	7490		17.0042	16652	14938	13788	10264	9205	11735	11695	10409
17.05	54543	66230	65290	27705	25330	22933	25974	27217	25088	11935	9662	11378	7661	7704	7872	7486	7568	7532	7698	7829	8097	20332	17783	16140	14910	15435	15060	7483	8500	16944	7375	7913	7433	8127	7975	8102	8034	7999	7631		17.05	16857	14895	14116	10710	9217	12184	11571	10137
17.0958	55213	65860	66439	28158	25510	23491	26490	27021	25333	11912	9779	11522	7740	7712	8007	7454	7647	7562	7620	7746	8128	20449	17821	16659	14726	15290	14948	7556	8674	16653	7404	7909	7477	8077	7813	7977	7738	7763	7428		17.0958	16706	14920	14131	10584	9389	11920	11350	10334
17.1417	54550	66653	66375	28429	25569	23447	26121	27227	25027	12058	9415	11671	7623	7722	8072	7395	7653	7477	7616	7740	7968	20038	18252	16405	15018	15467	14945	7779	8743	16380	7783	8038	7580	7973	7999	8124	7990	8137	7626		17.1417	16795	15227	14328	10595	9244	11697	11479	10065
17.1875	55114	66621	66417	28182	25774	23287	26265	26431	25129	12284	9478	11364	7793	7670	7735	7421	7736	7453	7425	7793	7990	20225	17769	16324	15174	15314	15151	7645	8784	16500	7471	7970	7581	8194	7746	7943	8000	7904	7264		17.1875	16611	15186	14237	10280	9140	11921	11407	10415
17.2333	54943	66389	65762	27379	25269	23651	26153	27230	25434	12255	9568	11577	7858	7869	7901	7521	7642	7441	7651	7935	7811	20317	17959	16628	15153	15364	14980	7629	8669	16529	7406	7986	7716	8083	7950	8191	7963	7900	7683		17.2333	16722	15303	14191	10727	9603	11921	11395	10504
17.2792	54312	66396	65517	28049	25796	23413	25941	26886	25417	12068	9621	11673	7501	7710	7805	7480	7693	7720	7656	7770	8027	20611	18000	16167	15110	15463	14958	7714	8752	16674	7580	7613	7557	8239	7874	8153	7814	7824	7543		17.2792	16716	15120	14400	10524	9618	11746	11701	10288
17.325	54731	66919	65640	28234	25505	23490	26232	27065	25242	12311	9728	11804	7762	7755	7975	7392	7605	7499	7731	7648	7741	20307	18238	16553	15368	15298	15005	7764	8630	16737	7531	7771	7680	8194	7820	8063	7931	7944	7323		17.325	16513	15003	14109	10331	9441	12088	11536	10096
17.3708	54785	67233	66005	27973	25638	23554	25724	27283	25426	12355	9751	11227	7951	7667	7976	7188	7601	7517	7480	7720	7995	20348	17840	16379	15074	15317	15165	7616	8876	16543	7579	8002	7573	8127	7896	8092	8214	7993	7491		17.3708	16577	14831	14377	10611	9569	11826	11476	10325
17.4167	54595	66361	66542	28130	25192	23340	26237	26760	25524	12018	10016	11777	7746	7825	7912	7419	7681	7503	7443	7715	8054	20292	17688	16588	14828	15357	14956	7614	8840	16809	7451	7849	7351	8106	8174	8207	8140	7969	7330		17.4167	16879	15114	14395	10567	9382	12008	11552	10335
17.4625	54747	66138	66087	28079	25370	23573	26286	26934	25488	12346	9762	11730	7646	7837	7747	7521	7360	7523	7773	7703	7881	20378	18184	16380	15170	14965	15056	7590	8688	16337	7461	7682	7555	7863	7681	7781	8044	7860	7569		17.4625	16634	14892	14247	10523	9341	12044	11562	10422
17.5083	54810	66692	66006	28257	25595	23775	26451	27287	25520	12519	9653	11711	8029	7625	7774	7253	7448	7441	7708	7818	8001	20325	17938	16368	14990	15422	15015	7667	8763	16669	7256	7851	7625	8003	7848	8020	8186	7778	7539		17.5083	16468	15031	14057	10706	9371	12086	11619	10175
17.5542	54260	66026	65304	27955	25599	23536	25945	26730	24963	12275	9877	11808	7707	7587	8083	7507	7312	7596	7687	7814	7774	20261	17857	16488	14878	15552	15016	7809	8723	16820	7669	7905	7602	8369	7835	8107	7755	7799	7396		17.5542	16789	15190	14127	10627	9592	11877	11334	10315
17.6	53700	66949	65533	28041	25892	23229	26435	27018	24917	12368	9894	12010	7622	7545	7966	7282	7550	7851	7517	7815	8061	20499	17959	16233	15255	15339	15165	7822	8805	16721	7292	7865	7534	8071	7786	7989	7859	7939	7566		17.6	16597	14761	14115	10568	9597	11880	11302	9948
17.6458	54680	66830	66137	27753	25333	23456	26390	27465	25163	12357	10039	12143	7673	7412	7698	7546	7575	7500	7530	7572	7856	19905	17965	16454	15376	15585	15252	7678	8601	16733	7451	8011	7439	7802	7970	7911	7683	8104	7294		17.6458	16804	14964	14004	10662	9588	11937	11616	10324
17.6917	54461	67026	65807	28047	25740	23143	25925	26841	25377	12636	10011	12076	7663	7566	7879	7458	7579	7588	7632	7717	7821	20332	17876	16490	15298	15387	14881	7648	8821	16847	7532	7884	7500	7986	7902	7926	7866	8060	7553		17.6917	16691	14710	14122	10345	9350	12071	11327	10142
17.7375	53801	66381	65138	28030	26170	23838	26416	27357	25059	12300	9971	11881	7505	7579	7797	7653	7834	7583	7560	7836	7991	20359	18026	16282	14902	15317	14981	7639	8830	16875	7428	7721	7715	8102	7930	7757	7938	7842	7651		17.7375	16684	15216	13925	10446	9356	11928	11645	10288
17.7833	54601	65883	66162	28494	25537	23707	26190	26664	24656	12329	10214	11944	7672	7859	7867	7497	7567	7472	7743	7874	7963	20551	17868	16388	15261	15344	14868	7549	8588	16923	7462	7866	7334	8099	7895	7779	7828	7959	7587		17.7833	16740	15443	14023	10718	9349	11773	11419	10558
17.8292	55012	66106	66414	27816	25396	23227	26307	26859	25155	12400	9964	11983	7578	7760	7985	7593	7474	7521	7443	7653	8057	20531	17688	15985	15153	15420	15135	7611	8956	17276	7453	7959	7531	8161	7686	8009	7811	8112	7534		17.8292	16670	15130	13809	10576	9339	11612	11776	10113
17.875	54233	65794	66084	27877	25621	23594	26309	27219	25179	12635	9907	11952	7626	7831	7830	7278	7610	7613	7578	7806	8017	20209	17817	16536	15121	15254	14975	7756	9079	16877	7378	7658	7790	8012	7871	7977	7883	8030	7521		17.875	16785	15340	14114	10702	9351	11906	11297	10160
17.9208	54245	66453	65957	28227	25503	23464	26390	26904	25097	12515	10041	11941	7669	7683	7989	7235	7634	7530	7696	7594	7837	20075	18270	16446	15042	15394	14854	7662	8976	16810	7423	7795	7500	8223	7871	7924	7985	8018	7450		17.9208	16535	14962	13836	10459	9418	11780	11455	10388
17.9667	54796	66812	66056	27985	25857	23519	26145	27539	25898	12428	10218	11970	7547	7749	7902	7487	7511	7653	7622	7704	8160	19910	18018	16489	14905	15275	14966	7726	9171	16564	7257	7982	7651	8113	8028	7832	8007	7848	7526		17.9667	16285	15034	13911	10525	9259	11790	11594	10285
18.0125	54755	65999	65910	27757	25504	23450	26370	27240	25261	12273	10119	12084	7649	7663	7995	7654	7686	7521	7792	7731	8198	20443	17738	16305	15195	15441	14999	7698	8934	16885	7582	8161	7573	8098	8119	7953	7718	7938	7529		18.0125	16603	15315	13915	10439	9265	11709	11520	10285
18.0583	53819	66574	66392	27751	25782	23560	26399	26636	25250	12615	10142	12208	7721	7709	7938	7318	7519	7732	7624	7814	8043	20415	17575	16574	14982	15592	14759	7757	8779	16784	7619	7728	7401	8097	7904	7838	8095	7831	7377		18.0583	16770	14970	14165	10621	9465	11996	11606	9997
18.1042	54544	66224	66201	27686	25757	23278	26152	26974	25524	12613	10125	12173	7533	7710	7950	7490	7546	7532	7583	7729	7989	20211	17900	16327	15216	15307	15125	7761	9011	16808	7326	7839	7647	8092	7849	7891	7946	7846	7364		18.1042	16539	15045	13897	10504	9303	11986	11399	10219
18.15	54266	66455	66359	27824	25816	23612	26546	27492	25569	12358	10197	12077	7675	7693	7877	7224	7639	7646	7552	7938	8109	20471	18135	16346	15135	15171	14695	7773	8889	17040	7649	7687	7562	8133	7936	7913	8050	8000	7502		18.15	16162	14787	13447	10505	9508	11887	11512	9972
18.1958	54391	65902	66291	27997	25558	23511	25948	26895	25111	12547	10418	12211	7620	7513	8079	7269	7649	7651	7619	8033	7581	20374	17922	16624	15043	15724	14801	7898	8953	16751	7425	7671	7573	7910	8100	7686	7862	7961	7511		18.1958	16698	15271	13639	10892	9362	11937	11544	9978
18.2417	54890	66540	65505	27521	25591	23196	26600	27529	25059	12710	10227	12543	7748	7592	7942	7426	7691	7801	7752	7734	7844	20355	17840	16371	15142	15376	14828	7999	9151	17112	7680	7893	7621	8001	7685	7900	8103	7963	7297		18.2417	16921	15121	14106	10437	9368	11715	11494	10222
18.2875	55277	67133	65609	27990	25449	23396	26380	26997	25678	12473	10271	12303	7668	7561	8131	7138	7744	7728	7593	7616	7961	20514	17793	16590	15088	15513	14922	7809	9060	16970	7601	7732	7673	8055	7985	7875	8000	7747	7377		18.2875	16619	14915	13936	10447	9383	11890	11675	10127
18.3333	54407	67202	65221	28131	25630	23275	26053	27352	24931	12634	10398	12284	7731	7669	8139	7197	7728	7445	7599	7741	8054	20375	18140	16416	14995	15351	14736	7651	9114	16957	7436	7774	7402	7889	8082	8013	8017	7883	7384		18.3333	16770	15058	13915	10773	9326	11874	11234	10477
18.3792	54981	66260	65502	28064	25503	23044	26031	27486	25743	12820	10588	12224	7726	7614	8113	7225	7420	7660	7569	7828	7837	20315	17961	16564	15268	15356	14928	7861	9127	16583	7322	7712	7587	7824	7785	7831	7714	8091	7786		18.3792	16399	15060	14023	10410	9290	11927	11390	10001
18.425	54450	66486	65662	27660	25433	23632	26295	27400	24944	12570	10356	12669	7851	7738	7720	7316	7661	7493	7662	7680	8085	20345	18125	16400	15181	15284	14601	7843	8889	16819	7495	7880	7503	8034	7953	7793	7953	7881	7495		18.425	16597	15008	13565	10640	9336	11773	11451	10281
18.4708	54926	66371	65477	27680	25461	23588	26085	27043	25369	12608	10523	12475	7563	7622	7748	7317	7597	7714	7700	7738	8043	20478	17997	16563	15307	15163	14886	8007	8847	16954	7468	7883	7783	8066	7730	7946	7958	7848	7451		18.4708	16575	15223	13875	10520	9344	11545	11467	10199
18.5167	54191	66160	66091	28024	25384	23324	26110	26899	25635	12446	10557	12324	7453	7583	7905	7451	7615	7593	7533	7761	7833	20122	18153	15967	14890	15347	14783	7647	9126	16658	7613	7791	7794	8140	7907	8213	8140	7866	7632		18.5167	16835	15066	14122	10414	9463	11798	11522	10120
18.5625	54481	66526	65627	28157	25319	23480	26395	26989	25369	12615	10582	12726	7641	7730	8037	7206	7600	7488	7615	7553	7908	20342	17858	16630	15468	15204	14997	7937	8877	16906	7537	8012	7648	7846	7888	7621	7797	8017	7556		18.5625	16454	15055	14092	10421	9459	11519	11557	10030
18.6083	54244	66526	66388	27751	25322	23396	26305	26831	25224	12460	10491	12654	7572	7447	8029	7495	7554	7554	7456	7623	7941	20228	17772	16515	15048	15427	14997	7918	9226	17096	7309	7769	7437	7920	7749	7871	7937	7791	7367		18.6083	16794	14867	14040	10423	9654	12035	11499	10038
18.6542	54953	66769	65572	27743	25276	23352	26148	27460	25548	12767	10691	12341	7436	7715	8092	7350	7432	7899	7760	7885	8059	20323	17880	16242	15006	15258	14986	7814	8960	17140	7601	7730	7646	8114	8082	7685	7697	8031	7358		18.6542	16708	15064	14189	10654	9293	12003	11408	10101
18.7	54742	65973	66437	27536	25019	23533	26315	27249	25537	12552	10662	12458	7456	7849	8219	7448	7431	7614	7622	7704	7758	19936	18163	16183	15130	15170	14710	7895	8947	16962	7282	7947	7298	8096	7699	7825	7888	8001	7584		18.7	16997	15140	13923	10583	9511	11697	11596	10270
18.7458	54263	66227	65186	27576	25532	23287	26562	26771	25719	12633	10733	12512	7697	7513	7771	7475	7462	7335	7612	7765	7955	20219	17816	16398	14993	15164	14813	7936	9073	17017	7680	7891	7512	7844	7634	7804	7968	7769	7574		18.7458	16585	15006	13817	10715	9409	11568	11272	10092
18.7917	53616	66320	65478	27574	25524	23736	26328	27069	25727	12463	10675	12560	7411	7460	8074	7325	7564	7384	7584	7691	7919	20100	17613	16433	14935	15211	14996	7926	9502	17087	7543	7819	7473	8046	7781	8070	7996	7875	7634		18.7917	16713	15124	14238	10840	9319	11561	11350	9845
18.8375	53429	66982	65602	27991	25098	23541	26247	26752	25615	12481	10517	12919	7592	7526	8243	7328	7583	7487	7603	7814	7833	20114	17964	16535	15124	15108	15080	7511	8965	16982	7503	7852	7517	8252	7868	7878	7785	7963	7632		18.8375	16631	15066	13840	10363	9366	11516	11375	10129
18.8833	54280	66474	65868	27913	24993	23400	26276	27136	25642	12704	10586	12655	7491	7681	8115	7249	7510	7571	7604	7610	8244	20333	18224	16443	14820	15366	14806	8066	9301	16733	7492	7795	7684	8134	7817	7769	8031	7880	7419		18.8833	16742	14684	13642	10704	9604	11853	11344	10016
18.9292	53947	66221	66621	27918	25399	23807	26350	27009	25164	12753	10698	12489	7698	7762	7876	7303	7703	7697	7599	7789	7890	20340	17852	16698	15106	15473	15025	7891	9066	16785	7659	7711	7573	7899	7672	7651	7979	7748	7435		18.9292	16374	15085	14094	10472	9515	11888	11279	10015
18.975	54251	66381	65565	27307	25173	23781	26009	26570	25523	12590	10796	12489	7611	7627	7832	7282	7546	7595	7704	7740	7981	19892	17718	16388	15030	15205	14782	8196	9500	17102	7278	7901	7356	8227	7829	7786	8086	7786	7557		18.975	16739	15019	13953	10547	9500	11582	11401	10343
19.0208	54543	65971	65964	27707	24984	23926	26339	26862	25255	12566	11058	12604	7747	7744	7858	7383	7544	7603	7754	7654	7757	20104	17746	16498	15180	15185	15098	8186	9199	17163	7393	7828	7320	8062	7873	7855	7847	8006	7426		19.0208	16815	15122	13807	10738	9403	11441	11304	10024
19.0667	54096	66101	65122	27754	24679	23635	26208	27216	25715	12480	10836	12825	7650	7824	8170	7421	7552	7513	7597	7547	8118	20358	18119	16364	14918	15739	15082	7805	9028	17117	7604	7880	7583	8156	7841	7859	8103	7822	7522		19.0667	16471	15197	14092	10470	9608	11581	11417	10182
19.1125	54535	65574	65612	27887	25400	24030	25660	26913	25415	12685	10828	12725	7690	7557	8162	7463	7314	7650	7380	7600	7933	20285	18039	16538	14849	15433	14923	8155	9237	17289	7332	7604	7510	7900	8031	7913	8002	7742	7812		19.1125	16869	14994	14014	10628	9516	11707	11193	10168
19.1583	53421	66697	65697	27642	25455	23279	26337	27085	25342	12763	10772	12980	7397	7590	8007	7302	7564	7483	7462	7659	7987	20271	17902	16023	14764	15426	14981	8053	9029	17188	7418	7760	7722	8097	7797	7878	7932	7669	7622		19.1583	16685	15122	13761	10588	9482	11682	11433	10147
19.2042	54120	66140	64841	28091	25094	23462	26333	27161	25400	12914	10842	12790	7759	7740	8149	7449	7667	7791	7592	7795	7862	20245	17874	16322	14910	15528	14791	7932	9028	16936	7464	7797	7334	7725	7925	7813	7791	8234	7458		19.2042	16493	15158	14162	10681	9570	11889	11318	10010
19.25	54280	66464	65640	27624	25203	23724	26174	27561	25600	12873	11064	12858	7728	7706	8024	7252	7574	7454	7450	7783	7817	20202	17803	16376	15132	15145	15012	7934	9267	17283	7254	7839	7631	7822	7769	7985	8070	7780	7546		19.25	16625	15150	14099	10562	9491	11710	11255	10169
19.2958	54589	66947	65632	27906	25375	23672	25935	27218	25534	12859	11006	12964	7705	7846	8159	7503	7498	7627	7563	7713	7881	20120	17888	16337	15204	15318	14948	8014	9376	17324	7510	7737	7360	8194	7922	7858	7875	7648	7621		19.2958	16819	14838	13973	10539	9512	11600	11280	9990
19.3417	53985	66143	64911	28083	25103	23254	25999	26938	25632	13037	10979	13060	7435	7645	8147	7560	7353	7744	7507	7703	7911	20246	17913	16422	14553	15173	14962	7986	9275	17032	7383	7621	7360	7928	8016	7740	7949	7985	7373		19.3417	16522	15162	13874	10513	9664	11835	11237	10129
19.3875	54250	65711	65101	27801	25168	23463	26061	27252	25680	12603	10885	12852	7443	7589	7901	7436	7397	7573	7531	7692	7926	20391	17631	16246	15154	15339	14863	8093	9231	17123	7198	7966	7512	7942	7631	7920	7853	7808	7505		19.3875	16502	14990	14236	10539	9543	11859	11329	10023
19.4333	54328	65843	65224	27926	25546	23655	26281	27237	25290	12755	11238	12859	7586	7697	8121	7432	7302	7696	7774	7525	8001	20007	18278	16474	15091	15653	15017	8037	9347	17148	7273	7663	7545	8009	7903	7844	7674	7910	7326		19.4333	16498	14806	13852	10473	9368	11598	11060	10074
19.4792	53683	66784	65230	27715	25025	23828	26034	27010	25486	12811	11088	12617	7642	7570	8106	7356	7637	7660	7660	7970	7894	20247	18088	16420	15089	15325	14696	8073	9336	16950	7402	7557	7591	8013	7796	7980	7756	8051	7484		19.4792	16821	15028	14067	10457	9345	11918	11190	10490
19.525	54685	66327	65072	27707	25057	23734	26178	26990	25264	12768	11359	12958	7483	7648	8169	7348	7280	7582	7413	7611	8144	20274	18034	16307	15141	15274	15100	8241	9458	17167	7463	7541	7373	7867	8097	7830	7962	7739	7582		19.525	16878	14904	13715	10708	9459	11783	11235	10290
19.5708	54646	66405	65514	27966	25808	23490	25535	26957	25417	12832	11285	13120	7479	7766	8143	7329	7626	7503	7530	7870	7983	20305	17543	16469	15110	15195	14835	8023	9669	17149	7290	7722	7586	8077	8009	7748	8037	7929	7477		19.5708	16491	14931	13846	10604	9550	11671	11210	10140
19.6167	54211	65920	65500	27296	25588	23481	26615	27120	25478	12869	10980	13062	7485	7601	7901	7404	7587	7697	7784	7493	8084	20545	18014	16556	15063	15175	14548	8199	9773	17210	7325	8110	7288	8035	7992	8024	7977	7991	7437		19.6167	16462	15178	14069	10452	9474	11553	11213	9987
19.6625	54019	65692	65459	27280	25794	23490	26030	27121	25454	12860	11183	12995	7823	7685	8066	7314	7637	7839	7388	7574	8060	20170	17707	16324	14956	15558	15205	8144	9277	17402	7659	7788	7651	7977	7928	7963	7658	7821	7471		19.6625	16655	15228	14089	10401	9467	11797	11047	10134
19.7083	54716	66282	65158	27849	25972	23984	26214	26919	25481	12963	11058	13120	7424	7575	8038	7315	7541	7350	7640	7960	8023	20415	17831	16188	15090	15370	15079	8224	9368	17062	7169	7826	7620	7993	7961	7851	7908	7794	7634		19.7083	16515	14958	14100	10406	9462	11610	11213	10424
19.7542	53771	66664	65558	27790	26330	23619	26277	27156	25352	12729	11348	13034	7860	7680	8061	7239	7456	7559	7695	7778	7888	20163	17385	16265	15094	15287	14884	8273	9687	17219	7424	7730	7421	7870	7956	7747	7894	7892	7421		19.7542	16643	15164	14006	10425	9123	12088	11300	10099
19.8	53965	66201	66209	28123	25679	23422	25951	26797	25673	12896	11248	13086	7569	7719	7950	7236	7589	7619	7461	7800	7909	20485	18041	16579	14922	15272	14918	7875	9290	17148	7305	7899	7419	8075	7841	7987	7957	7925	7490		19.8	16803	14939	14165	10560	9471	11859	11305	10030
19.8458	54447	65548	65226	28104	26278	23749	26057	27054	25488	12620	11097	13094	7635	7775	8023	7334	7389	7811	7547	7689	7987	20210	17734	16458	15142	15193	14996	7968	9424	17172	7554	7713	7616	8005	7729	7832	7907	7960	7506		19.8458	16711	15213	14290	10654	9544	12075	11436	10159
19.8917	54261	66571	65439	28448	25397	23653	26224	26698	25755	12779	11241	13062	7558	7650	8129	7362	7445	7357	7609	7657	7906	20628	17672	16207	14799	15424	14703	8213	9177	17053	7255	7668	7478	8054	7938	7776	7969	7689	7486		19.8917	16416	15126	13872	10499	9572	11844	11142	9908
19.9375	54310	66457	65071	27924	25722	23552	25737	27073	25826	13043	11381	13063	7644	7748	8165	7628	7377	7525	7781	7747	7974	20267	18028	16226	15107	15276	14972	8310	9543	17057	7324	7697	7438	8001	7805	7789	7862	8079	7683		19.9375	16740	14819	13844	10496	9560	11793	11354	10248
19.9833	54025	66085	65723	28282	25898	23646	25628	27070	25611	12934	11404	13118	7710	7654	8158	7568	7404	7398	7448	7759	7948	20093	18069	16389	14950	15207	14989	8358	9687	17264	7434	7743	7599	7663	7918	7972	7756	7934	7505		19.9833	16459	14797	14149	10544	9700	11664	11402	10028
20.0292	53903	66279	65603	28391	26073	23718	26187	26911	25562	12800	11359	13648	7683	8001	8337	7156	7287	7621	7712	7530	7860	20240	17796	16136	14961	15447	14959	8165	9559	17201	7239	7954	7583	8025	7838	7664	7759	7965	7319		20.0292	16947	14774	13820	10704	9644	11640	11230	9993
20.075	53887	66765	64775	27946	26245	23553	26402	27264	25333	12879	11350	12877	7507	7799	8088	7243	7436	7477	7654	7745	7993	20259	18095	16104	14926	15599	14975	8241	9269	16973	7256	7797	7685	7962	7778	7959	7718	7779	7577		20.075	16713	14864	13983	10622	9612	11648	10982	10170
20.1208	53801	66234	64850	27975	26290	23749	26576	26993	25625	12945	11459	13102	7510	7690	8148	7539	7575	7672	7410	7698	8053	20325	17934	16658	14973	15636	14977	8327	9694	17026	7335	7668	7571	8139	7888	7797	8073	8010	7405		20.1208	16563	14930	14168	10699	9335	11816	11165	10028
20.1667	53755	66341	64782	28184	26061	23728	26175	27074	25583	12992	11439	13147	7694	7786	8021	7300	7558	7527	7734	7688	8086	20120	18044	16301	15113	15844	14802	7909	9790	17181	7438	7839	7385	8027	7831	8180	7863	7915	7243		20.1667	16720	14986	13950	10533	9466	11787	11100	10119
20.2125	54186	66307	65295	27593	26189	23780	26152	26683	25874	13019	11809	13291	7700	7606	8229	7286	7637	7539	7706	7844	7829	20164	17871	16451	15276	15135	14688	8124	9755	17321	7335	7866	7348	7849	7818	7779	7914	7929	7471		20.2125	16507	14887	13643	10496	9411	11716	11340	10351
20.2583	54153	65779	65219	28235	26160	23167	25895	27077	25215	12975	11491	13097	7412	7821	8234	7462	7504	7649	7444	7689	8037	20606	18062	16276	14745	15379	14514	8420	9548	17476	7349	7706	7485	8177	7818	7855	7868	7808	7574		20.2583	16626	14627	13839	10626	9650	11927	10894	10241
20.3042	54102	66039	65400	27515	26068	23197	25806	26967	25335	12903	11760	13299	7680	7518	8404	7261	7415	7612	7704	7580	8128	20314	17497	16538	15061	15445	14935	7987	9518	17177	7483	7913	7433	7948	7716	7962	8150	7650	7571		20.3042	16551	14904	13996	10359	9235	11948	11071	10251
20.35	54330	66169	64946	28033	25932	23533	26087	26847	25511	12826	11411	13164	7608	7659	8299	7436	7510	7539	7593	7702	7882	20164	18130	16493	15152	15551	14844	8406	9759	16992	7384	7703	7277	7993	7809	8027	8130	7713	7547		20.35	16880	15035	14044	10544	9522	11722	11210	10317
20.3958	54846	66174	64915	27919	25860	23898	25870	26563	25408	12806	11598	13456	7732	7655	8269	7331	7676	7237	7325	7778	7810	20716	17814	16210	15246	15227	14609	8360	9341	17125	7590	7678	7145	7993	8111	7951	7851	7828	7618		20.3958	16444	15057	14394	10338	9473	12020	11076	9878
20.4417	54216	66231	64903	28089	26049	23260	26418	26696	25209	12910	11777	13312	7841	7757	8215	7300	7417	7625	7554	7942	7929	20202	17977	16284	14927	15365	15073	8457	9410	17344	7349	7676	7554	8081	8019	7910	7711	7765	7274		20.4417	16426	15031	13786	10618	9363	11667	11317	10005
20.4875	54401	66451	65081	27884	25540	23421	26242	27076	25790	13122	11535	13334	7705	7911	8137	7351	7420	7519	7607	7533	7854	20250	17914	16566	15300	15587	14537	8265	9570	17215	7391	7572	7400	7902	8070	7929	7933	8021	7475		20.4875	16688	15326	14150	10542	9583	11762	11407	10142
20.5333	54123	66267	65305	28120	25788	23512	25983	27227	25560	13025	11598	13533	7630	7736	8260	7297	7467	7563	7508	7672	8097	20249	17804	16575	14810	15188	14729	8320	9605	17427	7429	7822	7590	7913	7691	7776	7805	7893	7352		20.5333	16960	15168	13918	10546	9537	11938	11123	10314
20.5792	54062	66435	65171	28394	25759	23373	26290	26878	25610	12955	11547	13424	7536	7715	8377	7174	7391	7419	7553	7607	7933	20116	17971	16207	14847	15112	14773	8318	9936	17277	7598	7887	7775	7895	7969	7960	7850	7698	7503		20.5792	16690	14687	13903	10493	9514	11472	10975	10300
20.625	53847	66158	65374	28149	25815	23454	25928	27469	25341	13098	11523	13384	7627	7714	8251	7299	7428	7509	7536	7471	7956	20410	17897	16242	15171	15452	14827	8423	9548	17321	7473	7967	7438	8050	7925	7864	7962	7811	7514		20.625	16906	15027	13899	10324	9522	11585	11265	10068
20.6708	54299	66781	65397	28056	26127	24049	26235	26935	25359	12963	11771	13410	7646	7757	8171	7363	7862	7529	7731	7839	8189	20433	17740	16221	15011	15032	14769	8360	9550	17455	7267	7753	7693	7917	7730	7925	7885	7936	7573		20.6708	16735	15377	13542	10246	9684	11872	11261	10213
20.7167	54391	65412	65027	27768	26089	23622	25920	27081	25719	12897	11876	13541	7645	7815	8253	7292	7586	7501	7697	7790	8004	20404	17801	16228	15231	15512	15156	8367	9747	17181	7419	7736	7639	8016	7875	7839	7857	7670	7556		20.7167	16515	15025	14039	10594	9550	11539	11178	10038
20.7625	53918	65973	65264	27783	26006	23398	26125	27440	25759	12807	12017	13595	7386	7803	8096	7539	7505	7497	7516	7607	7883	20445	17779	16362	14864	15255	14608	8459	9743	17427	7354	7912	7462	8084	7944	7841	7972	7940	7424		20.7625	16753	14921	14052	10517	9677	12080	11270	10222
20.8083	54577	66021	65560	27795	25897	23571	26080	26711	25442	12997	12035	13685	7726	7639	8031	7436	7591	7594	7925	7759	8186	20129	17801	16129	15121	15058	15124	8342	9728	17321	7647	7888	7228	7914	7781	7869	7902	7998	7579		20.8083	16718	14776	14000	10537	9365	11640	10879	10007
20.8542	53804	66326	65175	28042	25690	23671	25827	26638	25339	12869	11987	13482	7580	7570	8295	7395	7555	7380	7714	7862	8021	20103	17810	16478	14974	15242	14802	8292	9550	17014	7371	7669	7498	7775	7955	7768	8118	7801	7358		20.8542	16103	14863	13855	10369	9176	11585	11223	10083
20.9	53560	66534	64441	27819	25912	23481	25955	27297	25479	13042	11999	13489	7613	7821	8307	7542	7515	7630	7551	7641	7940	19989	17566	16325	15041	15478	14800	8488	9646	17304	7522	7775	7536	7639	7465	7702	7868	7953	7587		20.9	16212	15479	14140	10558	9417	11813	11319	10196
20.9458	54211	66684	65034	27789	25556	23299	26429	27214	25086	13134	11999	13534	7564	7747	8408	7533	7385	7536	7512	7851	8160	20588	17768	16433	14832	15082	14574	8498	9724	17442	7479	7652	7329	7786	7696	7957	7805	8167	7235		20.9458	16722	15099	14135	10460	9453	11778	11168	10165
20.9917	54454	65660	64975	27464	26194	23210	26284	26863	25409	13206	12094	13754	7624	7925	8542	7411	7588	7425	7713	7545	7988	20148	18045	16406	15069	15230	14984	8499	9603	17265	7616	7899	7254	7978	7934	7822	7937	7842	7477		20.9917	16511	15215	13621	10542	9557	11693	11246	9984
21.0375	53908	65540	63856	28085	25762	23370	25757	27185	25663	12960	12213	13669	7688	7913	8421	7295	7438	7753	7688	7625	7979	20495	17908	16447	15299	15281	15125	8359	9819	17163	7557	7781	7309	8086	7814	7965	8003	7906	7363		21.0375	16811	14943	13973	10614	9179	11526	11116	10175
21.0833	53918	66462	64973	28056	26400	23613	25764	27241	25249	12864	12030	13660	7622	7617	8166	7222	7639	7537	7609	7876	7923	19973	17620	16415	15084	15396	14645	8494	9698	17461	7595	7627	7310	8087	7759	7839	7820	8044	7460		21.0833	16542	15200	14175	10413	9527	11750	10982	9969
21.1292	53177	65825	65205	27879	26236	23347	26017	27224	25549	12946	12052	13946	7524	7714	8225	7383	7394	7369	7959	7741	7822	20534	17834	16244	15082	15376	14691	8714	9929	17232	7475	7796	7610	8114	7995	7961	8077	7918	7500		21.1292	16595	14727	13760	10438	9577	11491	11209	10014
21.175	53331	66221	64961	27562	26192	23243	26464	26748	25498	13222	12049	13802	7561	7850	8282	7251	7486	7616	7750	7650	8146	20357	17558	16409	15307	15517	14880	8561	9924	16920	7442	7749	7483	7992	7987	7725	8003	7864	7364		21.175	16621	14961	13705	10473	9483	11497	11153	10242
21.2208	53802	67071	64768	27769	26384	23597	26155	26750	25550	12848	12235	13621	7785	7872	8112	7386	7259	7586	7702	7720	7674	20582	17725	16520	14983	15213	14877	8446	9803	17255	7354	7950	7516	7957	7838	7798	7840	7950	7457		21.2208	16672	15088	13861	10552	9403	11596	11092	10037
21.2667	53963	66031	65424	28008	26495	23212	26056	26691	25581	13157	12074	13855	7486	7768	7956	7585	7745	7643	7601	7741	7977	20428	17589	16169	14949	15317	15025	8501	9615	17177	7320	7894	7471	8157	8151	7865	8057	7880	7346		21.2667	16726	14838	13613	10380	9585	11926	11135	10006
21.3125	53569	65999	64736	27925	25954	23436	26228	26970	25208	12951	12425	13463	7626	7500	8385	7435	7349	7508	7678	7500	7798	20301	17687	16350	15071	15687	14964	8634	10146	17799	7497	7711	7600	7904	7755	7808	8012	7769	7388		21.3125	16755	15132	13792	10448	9432	11942	11099	10096
21.3583	53945	65895	65226	27699	26215	23179	26380	27296	25211	13200	12164	13852	7683	7843	8364	7379	7560	7396	7633	7728	7883	20353	17744	16226	15096	15510	14907	8620	9851	17303	7459	7865	7462	8011	8033	8113	8000	8014	7529		21.3583	16898	15180	14099	10492	9386	11908	11138	10146
21.4042	54519	66605	64934	27783	26910	23509	26256	26902	25540	13161	12108	13673	7746	7770	8311	7356	7721	7447	7537	7660	7933	20260	17489	16055	14939	15240	14906	8416	9675	17356	7413	7613	7473	7920	7789	7935	7886	7744	7476		21.4042	16545	15179	14002	10351	9494	11555	11186	9935
21.45	54469	66526	64497	28312	25952	23635	26257	27001	25460	13080	12229	13747	7628	7711	8298	7359	7633	7541	7531	7705	7675	20178	17477	16013	14967	15301	15084	8466	9852	17401	7286	7754	7596	8083	7810	7813	7828	7721	7433		21.45	16296	15073	14059	10635	9378	11784	10905	10245
21.4958	53799	66761	64879	28040	26128	23473	26585	26977	25635	13154	12092	13794	7608	7795	8616	7376	7492	7672	7654	7819	7943	20110	17646	16427	14909	15404	14995	8528	9836	17243	7240	7580	7391	7947	7861	7764	7927	8009	7593		21.4958	16675	14976	13981	10479	9701	11586	11221	9919
21.5417	53731	65923	64555	27731	26169	23292	26327	26779	25282	13408	12207	13516	7660	7770	8354	7406	7637	7451	7705	7817	7897	20306	17892	16209	14753	15325	14820	8425	9707	17531	7393	7627	7448	7889	8063	7747	8033	8038	7315		21.5417	16590	15158	13816	10370	9470	11807	11193	10011
21.5875	53605	65767	64903	27969	25873	23430	26440	26602	25533	13097	12261	13907	7714	7702	8303	7605	7464	7616	7524	7571	7960	20345	17708	16186	15247	15463	14619	8578	9716	17339	7196	7710	7478	8027	7810	7744	8050	7944	7401		21.5875	16278	14857	13860	10482	9169	11831	10931	10042
21.6333	53599	66066	64801	28145	26286	23250	26176	27174	25911	13046	12568	13804	7526	7550	8234	7392	7484	7656	7692	7563	7933	20700	18099	16834	15200	15534	14861	8658	9947	17358	7410	7728	7516	7881	7778	7927	7951	8024	7500		21.6333	16718	15126	14033	10364	9519	11551	10958	10085
21.6792	53616	66690	64855	27689	25768	23700	26216	26718	25166	12885	12281	13665	7571	7845	8107	7382	7391	7568	7606	7940	8083	20069	17975	16421	14791	15174	14799	8593	9995	17377	7164	7577	7506	8043	7904	7980	8087	8002	7523		21.6792	16733	15238	13874	10399	9353	11668	11376	10123
21.725	53784	66822	64575	27682	26271	23740	25973	26740	25244	12998	12227	13798	7452	7897	8363	7187	7464	7542	7468	7622	8036	20435	17918	16326	15164	15166	14862	8589	9908	17367	7464	7533	7447	8015	7612	7535	7963	8018	7607		21.725	16599	15180	14095	10488	9308	11619	10831	10212
21.7708	53518	66308	64452	27928	25793	23585	25988	27178	25551	12967	12232	13164	7737	7740	8443	7373	7560	7528	7626	7779	8060	20329	17713	16488	15131	15085	14607	8651	10011	17508	7524	7954	7272	7927	7943	7982	8043	7755	7536		21.7708	16504	15060	14059	10642	9571	11926	11058	9752
21.8167	53329	66921	64826	27733	26014	23092	25894	27394	25782	13035	12395	13850	7710	7798	8189	7410	7523	7573	7680	7525	8052	20462	17541	16605	14974	15411	14907	8906	9866	17397	7454	7690	7527	7900	7735	7893	7929	7939	7455		21.8167	16888	14848	14160	10439	9333	11593	11009	10151
21.8625	53339	66413	65067	27543	26160	24023	25881	26704	24901	13010	12230	13966	7563	7797	8402	7417	7481	7598	7738	7802	8068	20124	17975	16475	15243	15105	14787	8711	9790	17169	7259	7707	7520	7879	7817	7793	7962	7808	7266		21.8625	16479	15045	13791	10053	9331	11657	11277	9995
21.9083	53211	66382	64958	28107	26366	23639	26104	27183	25302	13154	12483	13653	7667	7573	8525	7444	7632	7640	7517	7617	8252	20183	17957	16352	15266	15162	14991	8644	9998	17664	7439	7878	7507	7962	7907	7987	7933	8122	7641		21.9083	16848	14741	14074	10446	9524	11941	11236	9921
21.9542	53645	66444	64689	27583	26063	23494	25975	26800	25383	13290	12416	13660	7490	7859	8528	7320	7482	7598	7652	7558	7943	20130	17848	16179	15155	14940	14830	8665	10029	16993	7334	7700	7327	8072	8060	7939	8039	7778	7568		21.9542	16757	14993	14082	10668	9587	11765	11290	10363
22	53254	65779	64055	27961	26386	23490	25787	27006	25463	13400	12209	14128	7728	7853	8388	7359	7610	7528	7753	7815	7710	20303	18020	16454	14958	15320	14488	8563	9975	17478	7535	7710	7308	8065	7808	7971	7883	7639	7499		22	16856	15268	14043	10541	9675	11792	11139	9814
22.0458	53516	66307	64621	27938	26013	23782	25943	26859	25144	13277	12307	13781	7552	7711	8439	7178	7477	7500	7648	7606	7995	20338	18168	16225	14940	15448	14668	8728	9918	17358	7272	7518	7617	7712	7996	8124	7971	7973	7613		22.0458	16513	15130	13889	10709	9565	11756	11269	9926
22.0917	53468	65879	64518	27952	25849	23502	26656	27059	25730	13015	12422	13809	7410	7585	8628	7321	7328	7311	7851	7726	8099	20054	18019	16308	15083	15275	14973	8701	9861	17189	7187	7816	7401	7937	8011	7914	7857	7969	7357		22.0917	16569	15004	14167	10482	9462	11905	11116	9873
22.1375	54112	66383	64057	27409	26353	23354	26317	26952	25723	13192	12465	13738	7399	7811	8485	7281	7513	7402	7516	8039	7885	19935	17888	16266	15213	15467	14809	8542	9992	17735	7299	7721	7375	7926	7872	7943	8020	7875	7499		22.1375	16650	15152	14161	10166	9802	11499	11088	10112
22.1833	54822	66331	64530	27731	25796	23744	26277	26829	25677	12911	12492	13957	7610	7816	8407	7476	7538	7230	7764	7764	8133	20276	17697	16272	14738	15336	15143	8586	10106	17311	7320	7577	7481	7796	7889	7813	7943	7988	7294		22.1833	16687	14853	14298	10294	9291	11511	10956	9776
22.2292	53657	66537	64306	27559	25935	23588	26133	26685	25612	13258	12529	13863	7525	7628	8303	7204	7469	7504	7402	7737	8008	20084	17785	16596	14966	15080	14530	8849	10029	17367	7397	7582	7528	7924	7900	7673	7879	7811	7420		22.2292	16797	14818	14131	10645	9395	11645	11175	9883
22.275	53956	66046	64354	27653	25565	23352	26184	27186	25658	13225	12469	13953	7514	7834	8298	7316	7771	7370	7491	7927	7881	20538	17692	16625	15326	15087	14993	8830	10008	17394	7250	7916	7228	7942	7883	7911	8073	7689	7528		22.275	16546	14642	13824	10070	9282	11681	11103	9939
22.3208	53565	65454	63734	27869	26210	23124	26030	26905	25555	13220	12777	13656	7676	7821	8462	7357	7563	7382	7585	7708	7850	20191	17740	16494	15051	14985	14664	8504	9944	17355	7356	7703	7681	7701	7880	7650	7794	7822	7672		22.3208	16648	15148	13955	10463	9291	11607	10973	10227
22.3667	53834	65828	64424	27672	26182	23584	26450	27210	25140	13030	12683	13935	7542	7827	8330	7531	7510	7577	7537	7623	8076	20132	17781	16563	15027	15282	14817	8536	10054	17411	7474	7853	7299	7860	7754	7923	7947	7645	7494		22.3667	16567	14597	13739	10523	9154	11466	10757	10002
22.4125	53298	66362	64422	27521	25713	23486	26135	27336	25682	13058	12787	13643	7352	7608	8550	7309	7590	7370	7322	7621	7772	20534	17897	16673	15074	15106	14562	8983	9996	17289	7225	7742	7477	8119	7658	8043	8095	7998	7164		22.4125	16401	14815	13846	10362	9244	11615	11076	9914
22.4583	53406	66412	64423	27918	26171	23593	26187	26865	24853	12970	12635	13973	7702	8010	8456	7147	7294	7498	7664	7668	8100	20260	17799	16151	14902	15231	14490	8753	10014	17258	7451	7747	7412	7903	7813	7764	8049	8011	7434		22.4583	16690	14661	14132	10455	9428	11744	10744	10133
22.5042	53249	65820	64293	28170	25612	23558	25792	26987	25115	12866	12321	13568	7527	7764	8642	7306	7538	7400	7425	7745	8152	20301	18053	16111	15054	15468	14971	8644	9924	17190	7307	7555	7652	7957	7828	7985	7967	7744	7595		22.5042	16775	15170	13782	10507	9317	11831	11210	10104
22.55	52917	66176	64803	27346	26306	23167	25978	27269	25482	13038	12873	14037	7569	7698	8612	7109	7359	7703	7853	7676	8144	20579	17417	16334	15191	15084	14676	9037	10076	17245	7565	7807	7487	7870	7641	7662	7963	7870	7479		22.55	16524	14886	14123	10331	9428	11748	10827	10292
22.5958	53182	65473	64837	27608	26087	23603	26049	26564	25346	13222	12683	14022	7623	7732	8564	7392	7558	7322	7650	7601	7968	20254	17675	16577	14883	15290	14782	8822	10156	17664	7476	7727	7592	8045	7797	7641	7820	7868	7358		22.5958	16688	15041	13915	10432	9558	11811	10986	9855
22.6417	52569	65578	64355	27943	25437	23087	26067	27009	25873	13173	12489	13835	7508	7742	8445	7499	7438	7428	7428	7612	8006	20226	17746	16317	15064	15201	14618	8699	9875	17380	7283	7558	7435	7990	7847	7688	7962	7935	7386		22.6417	16855	14899	13636	10231	9424	11513	11130	10016
22.6875	54042	65666	64344	27931	25493	23548	26004	26698	25728	13358	12793	13603	7793	7831	8732	7243	7512	7481	7737	7714	8101	20276	17661	16268	14828	15368	14586	8754	9946	17323	7503	7638	7516	7718	7783	7730	8002	7722	7211		22.6875	16395	14961	14056	10405	9380	11314	10918	10022
22.7333	53171	66285	64004	27689	26100	23762	26428	26988	25462	13064	12780	13907	7475	7684	8564	7435	7569	7692	7575	7644	7954	20561	17747	16382	15195	15097	14645	8944	9996	17321	7279	7536	7613	8112	7882	7930	7818	7949	7456		22.7333	16859	14939	13917	10217	9391	11607	10885	10023
22.7792	53871	66337	64037	27580	26010	23509	26096	27323	25397	12866	12690	13778	7681	7849	8420	7334	7573	7404	7565	7723	7930	19775	17749	16222	14926	15324	14948	8837	9900	17115	7384	7851	7680	7868	7823	7742	8033	7952	7443		22.7792	16601	14960	14025	10245	9357	11475	11020	10008
22.825	53479	66244	64620	27601	25805	23486	25939	26737	25482	13293	12443	13916	7591	7887	8543	7451	7419	7672	7713	7441	7719	20233	17730	16106	14641	15213	15038	8903	10147	17638	7255	7657	7631	7808	7846	7742	7858	7668	7188		22.825	16424	14962	13971	10241	9261	11675	11159	10005
22.8708	53400	66095	64613	27422	25996	23490	26291	27364	25135	13266	12924	14122	7690	7899	8497	7305	7320	7399	7378	7555	7891	20254	17678	16203	14838	15208	14951	9002	10151	17395	7638	7690	7658	7950	7675	7775	8108	7805	7320		22.8708	16674	14994	14102	10383	9415	11412	10810	9994
22.9167	53572	65868	64375	27683	25989	23239	26043	27305	25538	13274	12889	14320	7465	7894	8621	7371	7567	7388	7604	7646	7973	20177	17996	16274	14624	15161	14744	8890	10014	17477	7355	7844	7580	8006	7843	8005	7906	7932	7384		22.9167	16822	15169	13839	10671	9155	11712	11082	9900
22.9625	53366	65750	63435	27575	25386	23984	26344	27002	25379	13019	12668	14156	7668	7848	8682	7289	7533	7585	7621	7700	8076	20636	17882	16123	14875	15366	14477	9080	10093	17342	7672	7862	7334	8326	7934	7721	7869	8033	7393		22.9625	16421	14910	13792	10374	9412	11822	10893	10197
23.0083	53450	65952	63973	27776	25851	23451	25955	27289	25624	13115	12713	14134	7501	7843	8487	7214	7466	7387	7686	7829	7846	20406	17634	16666	15049	15196	14787	9008	10046	17247	7212	7741	7512	8132	7692	7722	7811	7792	7644		23.0083	16320	14872	13928	10308	9313	11499	10852	9901
23.0541	53574	65930	64358	27574	25826	23683	26058	26978	25313	13139	12726	14052	7533	7726	8552	7180	7487	7454	7523	7725	8094	20346	18045	16644	15200	15318	14523	8730	10193	17584	7556	7736	7538	8129	7823	7913	7939	7772	7327		23.0541	16596	14948	14074	10413	9317	11558	11118	10041
23.1	53966	65594	64318	27609	25860	23727	26132	27142	25574	13275	12361	14179	7520	7790	8404	7380	7463	7468	7669	7888	7934	20217	17662	16274	15121	15023	15064	8940	10170	17194	7385	7575	7562	7972	7907	7596	7998	7679	7342		23.1	16501	15185	14066	10534	9538	11608	10940	10053
23.1458	53402	66441	64781	27988	25408	23456	26277	26975	25459	13316	12777	13639	7537	7750	8630	7329	7444	7451	7683	7700	8057	20307	17628	16518	14893	15310	14533	8683	10041	17765	7344	7754	7368	7831	7951	7719	7978	7804	7596		23.1458	16862	14977	13903	10293	9251	11473	10871	10081
23.1916	53678	66111	63800	27590	25836	23263	26084	26929	25651	13318	12862	14164	7470	7870	8747	7189	7501	7596	7774	7678	7976	20100	17813	16475	14767	15376	14791	9093	10229	17518	7331	7794	7432	7947	8017	7907	7908	7871	7584		23.1916	16682	15292	14013	10396	9554	11339	10882	10055
23.2375	53258	66545	64110	27809	26281	23235	25921	27193	25254	13240	12790	14018	7724	7922	8547	7346	7452	7510	7668	7753	7917	20507	18060	16193	14721	15303	14823	9018	10154	17839	7449	7866	7404	7915	7763	7838	7768	7823	7502		23.2375	16669	14731	13850	10351	9345	11545	11058	10072
23.2833	53508	66082	63563	27631	25547	23177	26140	27279	25701	13082	12738	14276	7517	7849	8671	7188	7388	7635	7592	7877	8110	20469	17569	16352	15002	15383	14886	8867	9977	17275	7477	7534	7469	7950	7809	7951	7855	7848	7086		23.2833	16793	15088	13866	10584	9688	11357	11111	9930
23.3291	53345	65964	64569	27937	25987	23562	25881	26837	25487	13185	12692	14193	7508	7823	8681	7074	7552	7427	7543	7749	8035	20455	17576	16453	14879	15207	14913	8916	10307	17799	7497	7685	7416	7968	7952	7810	7808	7729	7541		23.3291	16448	14560	13953	10456	9547	11717	11237	10306
23.375	53508	66150	63913	27375	25177	23377	26027	26980	25908	12955	12751	14412	7335	7679	8610	7421	7410	7421	7831	7554	7978	20260	17892	16197	15040	15216	14890	8992	9896	17544	7212	7665	7498	7997	7911	7863	7744	7799	7455		23.375	16327	14724	13870	10562	9523	11910	10969	10076
23.4208	54021	66077	63952	27793	25781	23418	26019	27475	25585	13235	12728	14412	7445	7907	8318	7213	7592	7417	7684	7806	7813	20252	17564	16261	15069	15231	14725	9214	10126	17356	7523	7826	7267	8045	7720	7652	7923	7737	7374		23.4208	16458	14765	14292	10446	9524	11641	10834	10027
23.4666	54049	65891	64103	27868	25788	23342	26240	27215	25422	13131	12671	14342	7482	7723	8757	7238	7480	7442	7575	7821	8060	20158	17549	16455	15131	15120	14758	9313	10040	17325	7399	7602	7342	8097	7749	7722	7905	7795	7432		23.4666	16575	14775	13868	10466	9608	11649	10896	10077
23.5125	53450	65799	63704	27216	25270	22972	25812	26788	25576	12773	12741	14006	7503	7762	8863	7206	7558	7548	7636	7651	8004	20572	17604	16163	14834	15021	14786	9066	10218	17524	7507	7842	7322	7797	7957	8044	7813	7957	7660		23.5125	16661	14913	14253	10304	9347	11350	10972	10110
23.5583	54356	66312	63788	27474	25714	23310	26286	27100	25439	13053	12884	14084	7520	7940	8517	7364	7459	7417	7365	7524	7938	19922	18151	16415	14887	15259	14807	9320	10163	17445	7288	8026	7227	7700	7768	7793	8084	7941	7508		23.5583	16845	14848	14220	10197	9347	11680	11092	9960
23.6041	53920	66189	63899	27925	25654	22971	26348	27093	25786	13086	12915	14068	7536	7802	8569	7296	7477	7406	7579	7760	8035	20309	17649	15979	15011	15478	15045	8932	10157	17954	7396	7541	7291	8097	7724	8062	7974	7895	7268		23.6041	16498	14765	14133	10590	9577	11913	11181	10043
23.65	53501	66259	63859	27991	25646	23425	25873	26410	25344	13131	12637	14086	7451	7808	8700	7214	7311	7268	7482	7696	8114	20348	17927	16609	15181	15377	14689	8948	9982	17359	7322	7538	7415	7947	7780	7631	7886	7910	7551		23.65	16508	14974	13966	10372	9357	11524	11088	10067
23.6958	53664	65363	64070	28047	25817	23415	26120	26613	25256	13106	13195	14222	7326	7759	8792	7304	7573	7376	7505	7671	7888	20211	17826	16529	15001	15357	15031	9176	10170	17274	7361	7631	7295	7886	7906	7707	7935	7984	7364		23.6958	16541	14749	14185	10274	9646	11574	10917	9875
23.7416	53593	66036	63282	27805	25824	23238	25666	27295	25198	13122	12770	14206	7290	7954	8684	7203	7597	7352	7599	7570	8144	20353	17733	16522	15034	15056	14998	9306	10210	17724	7551	7720	7292	8062	7992	7889	7939	7809	7344		23.7416	16626	15116	13841	10631	9522	11641	10860	9906
23.7875	53727	65698	63165	27748	25655	23543	26173	26939	25130	13118	12904	14256	7464	7768	8788	7248	7599	7343	7409	7627	8122	20133	17539	16352	14650	15607	14589	9111	10042	17570	7335	7795	7546	7901	7515	7761	7857	8005	7337		23.7875	16473	14719	13777	10192	9330	11548	10950	9815
23.8333	53653	65763	63507	28229	25811	23425	26359	26896	25603	13223	12750	14059	7269	7826	8520	7088	7582	7304	7334	7805	7880	20110	17796	16073	15183	15461	14818	8938	10159	17313	7321	7670	7539	7861	7960	7864	7922	7691	7575		23.8333	16521	15050	14065	10185	9355	11915	10789	9642
23.8791	53101	66220	64143	27931	25922	23380	25821	26731	25619	13128	12644	14196	7630	7660	8618	7140	7437	7328	7530	7770	8008	20438	17616	16511	15053	15369	14691	9222	10133	17513	7321	7746	7460	7927	7537	7801	8048	7993	7415		23.8791	16456	15006	13971	10439	9417	11580	10964	9838
23.925	53777	66188	63537	27524	25929	23215	25859	26997	25223	13021	13039	14437	7465	7894	8606	7359	7417	7682	7566	7742	7944	20408	17451	16238	14691	15283	14640	9231	10171	17372	7311	7478	7424	7682	7574	7692	8086	7591	7308		23.925	16573	14689	13796	10131	9332	11790	11027	10105
23.9708	53153	66251	63372	27856	25844	23089	26239	26730	25483	13259	13003	14298	7617	7934	8684	7243	7319	7540	7735	7531	7901	20361	17791	16460	14859	15354	14610	9115	10181	17400	7175	7667	7561	7778	7727	7772	7949	7854	7483		23.9708	16382	14872	13832	10278	9686	11516	10802	9707
24.0166	52836	65922	63946	27545	25383	23101	25901	26846	25758	13147	12852	14089	7616	8044	8739	7293	7606	7448	7383	7633	7987	20238	17959	16420	15190	15071	14903	9250	9959	17288	7247	7648	7387	7909	7877	7665	7921	7894	7223		24.0166	16547	15123	13890	10266	9404	12034	11160	10303
24.0625	52595	65732	64132	27655	25262	23597	26224	26624	25354	12928	12587	14043	7478	8040	8700	7482	7344	7456	7656	7621	8131	19977	18174	16562	14850	15406	14983	8895	9995	17316	7643	7559	7216	7775	7507	7733	7821	7890	7396		24.0625	16670	14760	14030	10288	9404	11664	10845	9878
24.1083	53693	65707	63883	27550	25524	23387	25898	27249	25589	13293	12879	14220	7534	7805	8712	7276	7509	7422	7452	7676	7983	20281	17543	16234	14698	15240	14827	8898	10112	17383	7432	7682	7241	7920	7625	7945	7902	7866	7498		24.1083	16637	14747	14018	10313	9515	11877	10977	10035
24.1541	53157	65465	64241	27583	25539	23417	25882	26780	25550	13192	12915	14073	7553	7959	8722	7296	7609	7646	7597	7749	7892	20298	17974	16086	15059	14818	14735	9450	10266	17416	6974	7493	7520	7796	7804	7796	7625	8027	7407		24.1541	16755	15114	14027	10103	9423	11484	10990	9848
24.2	54089	65541	63736	27861	25556	23480	26146	26809	25513	13132	12753	14039	7602	7673	8685	7355	7402	7328	7582	7571	7939	20245	17455	16369	14925	15232	14677	9189	9818	17258	7557	7803	7392	7881	7668	7789	7898	7785	7406		24.2	16705	14813	13806	10376	9292	11661	10797	9992
24.2458	53045	66247	63397	28197	25591	23376	25958	27007	25213	12940	12924	14420	7537	7717	8831	7267	7768	7429	7653	7670	8250	20142	17868	16265	14752	15517	14814	9061	10277	17445	7487	7692	7296	7894	7836	7902	7910	7815	7312		24.2458	16628	14684	13957	10018	9576	11605	10970	10030
24.2916	53701	65439	64055	27695	25793	23714	26153	26697	25853	13121	12814	14208	7466	8039	8863	7309	7291	7559	7714	7737	7875	19712	17621	16134	14803	14887	14599	9402	10155	17340	7484	7725	7558	7756	7863	7613	8051	7988	7401		24.2916	16744	15142	13851	10403	9096	11667	11040	9876
24.3375	53368	65468	63267	27483	25645	23277	25535	26768	25316	13100	12507	14281	7493	7720	8799	7409	7408	7408	7566	7603	7973	20022	17592	16543	15214	15287	14598	9122	9782	17719	7340	7841	7346	7633	7719	7943	8147	7787	7431		24.3375	16894	15228	14028	10315	9450	11756	10935	10035
24.3833	53349	65907	64283	27485	25602	23263	26017	26686	25317	13095	13020	14108	7681	7819	8593	7269	7452	7714	7736	7680	7842	20204	17760	16337	14833	15617	14638	9342	10150	17896	7539	7715	7463	7584	7867	7804	7957	7761	7559		24.3833	16723	14891	14136	10224	9658	11437	10863	9927
24.4291	53909	65930	63854	27407	25388	23369	25845	26904	25339	13348	12673	14030	7515	7901	8930	7368	7482	7538	7492	7724	7635	20165	17881	16558	14798	15182	14798	9153	10156	17346	7364	7751	7394	7762	7757	7668	7909	7657	7374		24.4291	16561	14858	14040	10307	9366	11778	11422	9949
24.475	53807	65697	63602	27928	25411	23281	26156	26828	25234	12942	12925	14184	7510	7751	8905	7450	7531	7479	7545	7632	7721	20282	17635	16678	15109	15107	14940	9316	10296	17482	7258	7701	7457	7867	7926	7865	7849	7615	7615		24.475	16457	14979	13763	10420	9444	11477	11110	10204
24.5208	53421	65921	63575	27522	25522	23163	26004	26524	25574	12952	12690	14394	7671	7759	8835	7232	7379	7355	7861	7673	7989	20089	17620	16199	15052	14945	14745	9411	10222	17119	7261	7807	7500	7676	7796	7833	7934	7602	7382		24.5208	16535	14698	13796	10480	9400	11445	10787	9886
24.5666	53611	66205	63400	27336	25652	23148	26156	27180	25217	13209	12996	14175	7371	8029	8766	7395	7342	7379	7580	7808	7992	19765	17735	16192	14995	15123	14813	9482	10349	17731	7176	7924	7420	7730	7614	7860	7991	7793	7585		24.5666	16556	14935	13827	10178	9298	11533	10879	9874
24.6125	53929	65666	63847	27784	25724	23309	26198	26836	25548	13084	13382	14112	7526	7996	8782	7404	7561	7479	7585	7660	7954	20305	17659	16162	14924	15532	14742	9407	10132	17665	7572	7562	7497	7751	7645	7780	7897	7885	7436		24.6125	16661	14939	13764	10390	9510	11460	10978	10073
24.6583	53675	65814	63972	27549	25336	23427	25906	27026	24954	12988	12881	14674	7614	7851	8950	7244	7612	7238	7626	7673	8089	20224	17696	16319	14997	15017	14632	9285	10208	17480	7536	7622	7179	7933	7803	7822	7786	7775	7448		24.6583	16222	14755	13917	10153	9306	11700	10928	9957
24.7041	53344	65357	64045	27220	25366	23367	25778	27014	25222	13275	12783	14071	7312	7960	8898	7266	7390	7350	7737	7669	8222	20087	17375	16150	15039	15109	15002	9332	10313	17363	7303	7685	7466	8159	7869	7786	7928	7921	7298		24.7041	16655	14789	13961	10230	9138	11329	11232	10051
24.75	53531	65916	63473	28057	25526	23404	26246	27087	25086	13394	13203	14070	7541	7977	8827	7306	7327	7401	7811	7482	7860	19961	17876	16068	14843	15366	14545	9405	10269	17507	7395	7741	7180	7757	7649	7866	7692	7709	7347		24.75	16567	14705	13920	10559	9524	11278	10765	10132
24.7958	53764	65887	63338	27614	25598	23271	25848	26825	25032	13141	12880	14202	7458	7661	8863	7298	7450	7377	7395	7525	7859	20453	17622	16038	15119	15363	14755	9490	9884	17611	7290	7669	7596	8020	7831	7722	7778	7927	7319		24.7958	16813	14769	13675	10241	9489	11251	11075	10042
24.8416	53618	65344	63806	27439	25915	23344	25683	26813	25500	12948	13185	14362	7428	7769	9032	7396	7621	7422	7677	7817	7962	20236	17667	16116	15296	14823	14467	9321	10221	17654	7221	7632	7207	8066	7742	7921	7902	7806	7543		24.8416	16356	14818	14077	10497	9385	11539	10867	10144
24.8875	53542	65210	63442	28105	25671	23498	26282	26671	25396	13122	12923	14317	7473	7972	8942	7169	7443	7547	7640	7490	7811	20407	17849	16195	15034	15192	14566	9410	9974	17772	7344	7671	7484	7842	7854	7731	7834	7664	7650		24.8875	16469	14726	14036	10179	9231	11166	10839	9880
24.9333	52485	66146	64268	27080	25657	23256	25798	26746	25060	13173	13205	14315	7375	7879	8973	7200	7419	7501	7558	7758	7883	20178	17484	16143	15009	15071	14587	9345	9969	17497	7599	7500	7299	7829	7740	7771	7684	7649	7382		24.9333	16353	14626	13887	10166	9430	11288	10971	9736
24.9791	53879	66900	63335	27904	25305	23261	25942	27118	25471	12994	12924	14288	7606	7897	8742	7106	7342	7608	7574	7904	7959	19939	17831	16393	15359	15412	14655	9586	10071	17580	7170	7621	7565	7838	7918	7781	7719	7871	7420		24.9791	16411	14733	14142	10352	9295	11391	10991	10077
25.025	53620	65389	63412	27607	25577	23408	26095	26596	25482	13184	12914	14489	7692	7837	8907	7249	7334	7292	7664	7361	7927	20357	17470	16307	14693	15191	14693	9377	10363	17856	7518	7675	7438	7896	7847	7952	7874	7777	7354		25.025	16604	14838	13766	10372	9054	11319	10748	10145
25.0708	53355	65995	63729	27370	25918	23305	25768	26365	25806	13022	13016	14121	7453	7647	8852	7276	7576	7679	7621	7590	8099	20518	17530	16336	14874	15162	14775	9555	10492	17411	7487	7653	7409	7952	7712	7770	8194	7917	7336		25.0708	16379	14814	13893	10481	9451	11362	10973	9972
25.1166	52653	65263	64080	27432	25495	23164	26010	27135	25285	12974	13080	14177	7220	8019	9014	7514	7602	7562	7598	7801	8018	20141	17833	16535	14940	15360	14627	9342	9802	17591	7365	7680	7366	7713	7927	7910	8049	7812	7420		25.1166	16624	14527	13701	10198	9361	11310	10940	9799
25.1625	53073	65851	63283	28032	25573	23069	25971	26942	24952	13146	12971	13948	7487	7819	8751	7370	7410	7463	7609	7723	8062	19943	17475	15902	15026	14832	14753	9374	9947	17771	7488	7827	7357	7564	7533	7721	8125	7780	7443		25.1625	16137	14831	14025	10251	9397	11459	11155	10096
25.2083	53120	65643	63654	27291	25590	22994	25957	26774	25530	13215	12717	14168	7482	7908	9037	7059	7605	7438	7516	7730	7889	20070	17838	16071	14647	14921	14514	9439	10145	17414	7544	7585	7388	7857	7879	7833	7862	7688	7332		25.2083	16383	14901	13935	10363	9197	11568	10893	9953
25.2541	52834	65307	63035	27461	25682	23180	25995	26941	25477	12893	12899	14453	7292	8004	8892	7285	7378	7439	7573	7616	8069	19915	17860	16567	14825	15202	14619	9425	10179	17603	7185	7614	7461	7894	7698	7915	7884	7797	7643		25.2541	16792	15072	13950	10302	9240	11419	10716	9881
25.3	52575	66158	63752	27013	25626	23027	25972	26730	25389	13024	13032	14495	7314	7956	9032	7320	7390	7522	7611	7670	7834	19942	17517	15921	14929	15003	14902	9587	10274	17751	7218	7657	7457	7975	7754	7838	7720	7864	7278		25.3	16625	14678	13878	10376	9461	11290	10798	10074
25.3458	52983	66064	63156	27605	25401	23380	25409	27054	25525	13209	13136	14246	7511	7821	9044	7204	7419	7364	7692	7760	7948	20080	17666	16139	14739	15255	14907	9223	10295	17899	7436	7593	7340	8068	7843	7842	7968	7771	7257		25.3458	16490	14853	14048	10270	9220	11423	11107	10006
25.3916	53002	65613	63607	27603	25169	23083	25998	26766	25376	13015	12736	14327	7637	7926	9193	7177	7439	7358	7653	7427	8027	20264	17603	16325	14630	14857	14605	9543	10325	17703	7284	7542	7255	7797	7724	7716	8007	7927	7328		25.3916	16597	15112	13763	10382	9608	11639	10821	9899
25.4375	53569	65774	63724	27341	25491	23512	26006	26819	25559	13301	12716	14366	7599	7861	9155	7094	7520	7457	7449	7630	7915	20504	17629	16090	14518	15108	14543	9533	10125	17326	7332	7802	7124	7819	7824	7830	7939	7787	7500		25.4375	16481	14668	13758	10276	9472	11561	11047	9560
25.4833	53618	65916	63093	27517	25869	23185	25761	27016	25466	13176	12866	14267	7378	7903	8953	7218	7307	7364	7558	7837	7916	20297	17614	16040	14733	15281	14911	9675	10341	17744	7464	7502	7363	7815	7912	7801	7907	7839	7496		25.4833	16496	14669	13947	10263	9322	11530	10702	10097
25.5291	53230	65287	63742	27543	25671	22966	25695	27016	25541	12990	12712	14012	7488	7947	9217	7375	7479	7397	7657	7703	7891	20371	17568	16087	14838	14956	14868	9570	10188	17524	7308	7616	7637	7772	7752	7954	7818	7888	7382		25.5291	16823	14715	13985	10355	9172	11535	10816	10037
25.575	52805	65442	63076	27629	25633	23544	26335	26601	25389	13080	13018	14412	7349	7992	9071	7336	7298	7453	7485	7554	8030	20327	17515	16370	14817	15125	14859	9459	10151	17369	7188	7772	7351	7910	7802	7863	7537	7987	7558		25.575	16502	14727	13827	10318	9352	11248	10906	10043
25.6208	53091	65824	63793	27283	25487	23261	25896	27104	25509	13153	13179	14172	7371	7794	8886	7237	7262	7609	7710	7634	7932	20422	17794	16430	15009	15086	14733	9533	10544	17163	7063	7759	7379	7943	7748	7567	7713	7818	7423		25.6208	16317	14739	13661	10087	9390	11290	10834	10107
25.6666	52609	65787	63864	27474	25456	23127	26194	26827	25272	12955	12752	14147	7334	7994	9157	7570	7706	7446	7866	7540	7930	19934	17642	16068	14768	14993	14702	9406	10345	17518	7371	7613	7399	7861	7749	7981	7996	7967	7411		25.6666	16309	14790	14128	10169	9339	11550	10786	10110
25.7125	52515	65249	62857	27596	25657	23161	25957	26802	25250	12820	13025	14376	7661	7934	9129	7190	7528	7279	7799	7388	8036	19936	17344	16283	15048	15233	14771	9709	10265	17550	7427	7753	7305	7976	7806	7571	7921	7821	7468		25.7125	16370	14559	13752	10185	9346	11391	10888	10083
25.7583	53230	65841	63409	27566	26300	23010	25494	27212	25134	13166	13040	14231	7775	7840	9156	7430	7493	7430	7800	7869	8032	20258	17723	16167	14662	15064	14627	9443	10104	17566	7455	7265	7303	7700	7794	7758	7886	7716	7244		25.7583	16510	14807	13482	10010	9127	11491	10668	9725
25.8041	52898	66395	62766	27948	25618	22994	25971	26787	25521	13011	13302	14455	7526	7870	9046	7174	7496	7381	7493	7592	7934	20281	17423	16323	14690	15219	14697	9430	10436	17631	7332	7656	7291	7581	7722	7798	8038	7844	7446		25.8041	16620	14649	13830	10276	9408	11135	10862	9841
25.85	52759	65580	63512	27759	25622	23068	25879	26770	25298	13095	12835	14404	7535	8136	9216	7344	7455	7545	7491	7714	8074	20345	17818	15992	14864	15191	14370	9630	10097	17360	7464	7564	7526	7835	7820	7704	7908	7885	7224		25.85	16366	14603	13876	10179	9146	11311	10955	9852
25.8958	53592	66018	63116	27821	25665	23446	25974	26675	25451	12930	12978	14456	7540	7807	9217	7322	7363	7389	7544	7588	8291	20236	17403	16396	14653	15050	14693	9462	10236	17388	7465	7660	7540	7792	7638	7768	7763	7750	7569		25.8958	16583	14773	14091	10304	9424	11460	11016	9855
25.9416	52935	65261	63012	27822	25795	23447	25371	26847	25308	13099	12821	14521	7307	7992	8964	7229	7500	7440	7751	7607	7946	20241	17719	15985	14919	15293	14664	9518	10489	17433	7446	7804	7417	7808	7675	7781	7815	7916	7332		25.9416	16579	14679	14080	10307	9219	11394	11030	9948
25.9875	52306	65261	62804	27284	25492	23007	25772	26663	25284	12898	12945	14294	7795	7856	9131	7197	7401	7398	7666	7751	8063	20347	17622	16086	14708	14885	14540	9266	10523	17818	7530	7608	7443	7766	7765	7772	8009	7811	7197		25.9875	16517	14724	13901	10430	9333	11395	10977	9862
26.0333	52573	65534	63444	27081	25772	23026	25668	26947	25493	13201	12796	14405	7650	7863	9176	7217	7614	7535	7635	7710	7900	20428	17296	16038	14822	14982	14516	9499	10336	17624	7527	7696	7244	7889	7784	7836	7890	8010	7621		26.0333	16347	15033	13991	10196	9281	11432	10859	9795
26.0791	52336	64987	62978	27358	25458	22832	25433	26951	25664	13169	13270	14781	7335	7980	9145	7100	7307	7207	7543	7669	8009	20147	17349	16167	14760	15212	15010	9584	10087	17799	7249	7523	7456	7934	7802	7673	7866	7934	7484		26.0791	16589	14852	14079	10226	9253	11542	10778	10035
26.125	52242	65798	62471	27842	25381	22886	26065	26298	25283	12975	12837	14594	7553	7892	9219	7062	7405	7585	7764	7601	8037	20182	17403	16216	14971	15096	14668	9469	10123	17742	7456	7718	7443	7792	7751	7755	7816	7839	7405		26.125	16594	14793	14085	10186	9092	11399	10863	9852
26.1708	52296	65638	63588	27731	25541	22905	25999	26709	25345	13044	12738	14516	7607	7926	9364	7204	7412	7437	7767	7726	7802	20015	17450	16304	14719	15089	14791	9404	10249	17794	7391	7443	7323	7664	7779	7716	7924	7843	7521		26.1708	16583	14992	14019	10394	9224	11742	11050	9774
26.2166	52071	64705	63229	27470	25418	23153	25804	26813	25432	12927	12758	14300	7236	8022	9156	7193	7495	7420	7608	7653	8014	19964	17201	16173	15100	15237	14486	9454	10429	17608	7431	7381	7330	7856	7782	7824	7747	7958	7376		26.2166	16589	15147	13746	10354	9263	11452	11057	9963
26.2625	52588	65696	63322	27308	25436	23469	26194	26783	25238	13085	12961	14246	7222	7954	9276	7361	7601	7372	7541	7598	7931	20213	17424	15961	15116	15462	14674	9787	10373	17648	7307	7729	7423	7639	7685	7819	7683	7866	7562		26.2625	16414	14754	14086	10237	9307	11454	10817	9953
26.3083	52706	66021	63021	27229	25345	23136	25895	26697	25068	13103	12836	14339	7586	7947	9164	7196	7602	7384	7455	7662	7775	20038	17671	16384	14609	14837	14610	9542	10362	17849	7333	7504	7406	7684	7658	7687	7776	7737	7317		26.3083	16558	14858	13714	10226	9155	11400	10775	10100
26.3541	52120	65629	63212	27369	25386	23425	25681	26760	25220	13106	12753	14147	7397	8223	9184	7321	7385	7388	7450	7502	7946	20349	17200	16292	15183	15171	14607	9431	10035	17581	7388	7658	7183	7797	7843	7572	7793	7608	7254		26.3541	16807	15019	13826	10287	9004	11151	10789	9903
26.4	52333	65516	63318	27355	25596	22924	25742	26719	25074	13064	12972	14244	7185	8094	9066	7371	7716	7510	7412	7637	8021	20274	17614	16208	14701	15300	14559	9421	10480	17622	7200	7617	7307	7826	7667	7855	7742	7993	7411		26.4	16689	14750	13783	10097	9213	11366	10787	9745
26.4458	52699	65931	63175	27315	25154	23018	25822	26968	25474	12841	12996	14544	7438	7901	9319	7277	7516	7425	7505	7735	7901	19852	17437	15799	14978	15177	14474	9598	9982	18005	7419	7691	7365	8018	7795	7870	7744	7826	7481		26.4458	16645	14881	13874	10089	9240	11532	10799	9782
26.4916	52505	66352	62708	26991	25697	23225	25751	26849	25245	12881	12955	14383	7462	7907	9329	7312	7479	7212	7682	7558	7888	19945	17517	15981	14848	14991	14529	9607	10367	17786	7271	7509	7572	7845	7727	7708	7737	7913	7391		26.4916	16547	14538	14030	10434	9198	11212	10734	10100
26.5375	52884	64901	63053	27095	25399	22932	25663	26611	24756	13034	13001	14523	7543	8089	9235	7336	7401	7434	7525	7946	7887	20240	17618	15910	14834	14835	14552	9573	10334	17717	7438	7591	7387	7760	7766	7839	7820	7799	7458		26.5375	16431	14667	13865	10321	9376	11349	10837	10042
26.5833	52599	66048	62591	27467	25276	23175	25555	26928	25494	12718	12959	14319	7550	7908	9281	7252	7509	7593	7584	7689	8098	20026	17685	16308	14989	15234	14685	9338	10552	17807	7546	7642	7326	7836	7773	7876	7923	7924	7374		26.5833	16155	14904	13849	10422	9173	11320	10789	9724
26.6291	52831	65121	62753	27224	25731	23041	25988	27064	25228	13145	12703	14101	7597	8106	9237	7222	7449	7423	7589	7564	8083	20157	17632	15873	14662	15174	14744	9223	10225	17818	7375	7663	7248	7756	7850	7630	7858	7747	7362		26.6291	16394	14864	13870	10010	8976	11838	10845	9943
26.675	53127	65533	62414	27644	25758	23563	25654	27208	25309	12723	12895	14288	7407	7873	9190	7039	7698	7324	7613	7801	8140	20083	17757	16088	14895	14977	14887	9430	10460	17645	7445	7615	7572	7977	7873	7703	7992	7774	7263		26.675	16333	15000	13924	10181	9169	11424	10932	9829
26.7208	52838	65943	63401	27551	25497	23683	26078	27018	25198	13186	12909	14491	7311	7857	9242	7436	7396	7456	7495	7523	8069	20063	17448	16207	14843	14846	14793	9556	10199	18254	7271	7657	7342	7828	7747	7673	7928	7977	7484		26.7208	16538	14577	14042	10340	9279	11389	10732	9933
26.7666	52370	66083	63183	27517	25609	23231	25865	26813	25408	12697	12998	14656	7565	8038	9331	7255	7511	7327	7527	7631	7798	19739	17804	16292	15010	14961	14575	9607	10137	17505	7213	7656	7577	7973	7726	7860	7952	7759	7458		26.7666	16125	14847	13698	10307	9080	11210	10796	9812
26.8125	53130	65962	62370	27420	25689	23253	26013	26789	25556	12898	12697	14425	7490	8133	9238	7124	7499	7596	7577	7609	7979	20082	17631	15866	15017	14860	14802	9483	10359	17646	7265	7725	7445	7660	7929	7683	8049	7934	7393		26.8125	16152	14590	13647	10075	9080	11248	10989	9833
26.8583	53211	65708	62527	27416	25328	23030	25778	26925	25462	12780	13037	13997	7528	8261	9304	7090	7509	7841	7456	7447	8024	19946	17503	15873	14865	15138	14601	9609	10392	17842	7288	7621	7704	7895	7813	7883	7929	7724	7499		26.8583	16786	14698	13808	10269	9123	11416	10801	9565
26.9041	52909	65856	62663	27427	25639	23117	25942	26820	25184	12947	12934	14615	7350	8175	9595	7335	7479	7335	7773	7733	7789	20051	17542	15894	14676	15284	14459	9648	10221	17671	7378	7535	7356	7624	7985	7540	8135	7853	7296		26.9041	16500	14578	13847	10389	9282	11543	10871	9970
26.95	52237	65854	62681	27315	25541	23349	26103	26876	25159	13136	12904	14325	7476	8055	9497	7065	7326	7379	7482	7737	7929	19814	17290	16220	14801	15177	14944	9735	10447	17577	7195	7582	7305	7592	7812	7772	7873	7574	7519		26.95	16292	14839	13874	10146	9157	11496	10773	10012
26.9958	53020	65903	62528	27228	25432	23182	25862	26377	25281	12997	13099	14339	7681	8053	9391	7283	7772	7675	7526	7700	7941	20111	17419	16243	14711	15311	14941	9757	10301	17634	7279	7347	7442	7707	7689	7729	7744	7689	7464		26.9958	16366	14765	13820	10277	9121	11189	10768	10025
27.0416	52826	65336	63095	27089	24845	23160	25963	26437	25858	13038	12795	14399	7281	7977	9322	7287	7304	7653	7542	7532	7800	19662	17669	16177	14961	15191	14617	9539	10204	17684	7392	7577	7380	7639	7599	7816	7842	7847	7354		27.0416	16370	14790	13718	10045	8965	11449	10684	9838
27.0875	52301	65583	62976	27452	25650	23233	25642	26419	25367	13034	12794	14305	7412	8060	9320	7377	7511	7162	7544	7628	7713	19528	17207	15974	14717	15020	14796	9681	10400	17794	7235	7700	7362	7799	7677	7720	8035	7795	7170		27.0875	16418	14665	14074	10492	9367	11171	10813	9666
27.1333	52763	64676	62640	27267	25125	23156	25601	26927	25746	13021	12793	14194	7331	8116	9598	6984	7459	7502	7550	7602	7754	20142	17411	16051	14789	15186	14537	9368	10098	17897	7249	7614	7253	7654	7712	7550	7806	7826	7274		27.1333	16727	14985	14059	10171	9117	11211	10768	9857
27.1791	52274	65962	62266	27829	25426	23133	26030	26605	25058	12779	12633	14160	7427	8027	9433	7146	7444	7462	7628	7507	7895	19992	17710	16009	14716	15223	14666	9761	10204	17743	7261	7647	7427	7683	7645	7893	7747	7847	7331		27.1791	16486	14899	13593	10261	9240	11239	10680	9907
27.225	52618	65838	62524	27652	25692	23298	25593	26906	25197	13041	12799	14335	7305	7949	9355	7361	7218	7680	7473	7542	7883	20018	17287	15867	14894	14718	14670	9705	10445	17713	7413	7557	7348	7898	8007	7582	7788	7652	7421		27.225	16481	14608	13779	10150	9375	11402	10705	9865
27.2708	52493	65188	62283	27620	25678	23089	25819	26793	25067	12839	13005	14115	7383	8207	9597	7074	7369	7519	7674	7496	8050	19969	17510	16309	14643	15064	15023	9652	10147	17482	7261	7605	7343	7665	7774	7852	7761	7656	7336		27.2708	16621	14679	13907	10244	9131	11432	10756	9821
27.3166	52605	66167	62618	27321	25207	23232	25672	26401	25115	12845	12701	14221	7376	8122	9513	7208	7134	7227	7692	7648	7943	19930	17440	16063	15058	15096	14557	10007	10470	17711	7394	7761	7667	7880	7974	7940	7839	7659	7546		27.3166	16379	14822	13805	10193	9139	11226	11047	9743
27.3625	53206	66058	62264	27607	25476	23092	25834	26965	25529	12909	12810	14599	7437	7809	9506	7336	7340	7406	7462	7494	7948	19860	17310	15932	14996	14939	14803	9689	10340	17827	7464	7577	7368	7721	7561	7708	7856	7677	7348		27.3625	16527	14696	13989	10158	9229	11253	11173	9858
27.4083	52824	65020	62634	27512	25368	22804	25723	26609	24791	13047	12425	14279	7472	8070	9248	7152	7195	7472	7586	7658	8161	19863	17722	15930	14748	15098	14627	9881	10418	17561	7205	7551	7397	7867	7584	7897	7928	7669	7444		27.4083	16256	14840	14106	10295	9179	11530	10845	9835
27.4541	53170	65580	62530	27305	25478	23096	25637	26757	25211	13088	12676	14018	7361	8324	9522	7221	7334	7368	7619	7577	8197	20438	17335	16122	14434	15031	14508	9750	10334	17650	7458	7401	7386	7806	7759	7861	8051	7970	7328		27.4541	16463	14902	13820	10320	9221	11511	10934	9902
27.5	52930	65127	61982	27185	25437	23253	25934	26517	25220	13211	12802	14437	7434	8135	9648	7285	7445	7327	7645	7661	8024	20241	17648	16160	14796	15005	14500	9733	10442	17982	7395	7576	7231	7874	7732	7687	7974	7851	7467		27.5	16573	14652	13852	10386	9211	11521	10835	9951
27.5458	52490	65672	62622	27244	25387	23095	25868	26425	25460	12769	12585	13949	7579	8125	9449	7304	7230	7415	7450	7583	8052	19913	17744	16199	14877	15075	14495	9886	10417	17607	7336	7741	7175	7880	7692	7723	7697	7737	7608		27.5458	16338	14402	13651	10149	9344	11164	11038	9871
27.5916	53058	65289	62523	27160	25379	23018	25656	26629	25388	13236	12717	14134	7616	7933	9306	7108	7446	7523	7679	7494	7839	20126	17472	16044	14836	15180	14855	9918	10277	17767	7276	7669	7611	7670	7535	7905	7782	7951	7152		27.5916	16224	14555	14082	10189	9019	11109	10555	9727
27.6375	52166	65586	62233	27274	25575	23376	25278	26630	25053	12854	12793	14363	7438	8233	9608	7366	7566	7356	7496	7676	7933	20064	17010	15987	15231	15278	14393	9909	10470	17837	7269	7652	7339	7903	7685	7874	7980	7751	7273		27.6375	16291	14740	13931	10209	9152	11048	10805	9492
27.6833	52840	65890	62242	27143	25428	23458	25698	26916	25787	12977	12851	14197	7329	8111	9692	7143	7369	7493	7488	7584	7994	20125	17367	16087	14758	14942	14644	9719	10109	17622	7077	7548	7429	7461	7953	7939	7866	7810	7365		27.6833	16190	14474	13878	10249	9286	11227	10548	9998
27.7291	52549	64947	62601	27467	25211	23162	25964	26852	25108	12989	12604	14050	7503	8043	9580	7208	7546	7273	7527	7909	7940	20303	17432	16131	14830	15193	14568	9777	10472	17600	7346	7782	7248	7923	7856	7607	7930	8003	7490		27.7291	16549	14888	13810	10324	9260	11482	11012	9787
27.775	52358	66445	62252	27062	25625	22914	25914	26847	25347	12792	12786	14419	7364	7882	9687	7423	7486	7407	7503	7424	7872	20036	17597	16311	14864	14815	14672	9707	10272	17949	7340	7561	7154	7914	7809	7824	7755	7690	7300		27.775	16259	14821	14030	10134	9206	11495	10607	10005
27.8208	52549	64986	63101	27551	25098	22856	25926	26891	25095	13053	12770	14410	7291	8112	9486	7192	7392	7259	7641	7725	7915	20251	17438	16140	15180	14960	14816	9842	10536	17815	7300	7633	7538	7763	7540	7700	7811	7782	7313		27.8208	16497	14967	13998	10340	8942	11224	10689	9796
27.8666	52974	65902	62801	27116	25459	23130	25539	26483	25260	13088	12731	14158	7422	7857	9568	7216	7330	7368	7384	7689	7984	20033	17743	15938	14814	15354	14747	9734	10415	17688	7339	7860	7240	7637	7864	7703	7809	8032	7382		27.8666	16591	14399	13831	10297	9429	11247	10899	9969
27.9125	52876	65657	62049	27490	25254	23236	25472	26523	25221	13130	12816	14335	7220	8142	9755	7194	7493	7323	7756	7430	7844	20358	17565	16198	14601	15188	14392	10145	10496	17726	7342	7574	7134	7684	7679	7805	7783	7973	7521		27.9125	16432	14706	13379	10267	9289	11150	10735	9563
27.9583	52248	65703	62051	27091	25274	23167	25815	26697	25458	13079	12799	14466	7360	7857	9459	7359	7522	7540	7481	7382	8000	19875	17614	15981	14926	15144	14645	9893	10242	18079	7434	7556	7533	7906	7787	7785	7683	7924	7400		27.9583	16584	14377	13516	10180	9256	11443	10379	9860
28.0041	52319	65603	62866	27376	25700	22847	25198	26460	25257	12887	12707	14610	7191	8403	9476	7101	7613	7229	7582	7473	7943	20177	17578	16187	14735	14868	14736	9805	10485	17758	7243	7465	7284	7779	7681	7874	7836	7766	7388		28.0041	16646	14727	13612	10055	9058	11410	10814	9785
28.05	51883	65763	62241	27529	25283	23315	25522	26756	25025	13077	12619	14642	7297	8265	9577	7256	7441	7443	7528	7724	7923	20021	17295	15686	14840	15032	14851	9791	10408	17272	7167	7977	7392	7927	7538	7707	7593	8001	7308		28.05	16940	14675	13646	10247	9230	11204	10972	9815
28.0958	52759	65684	62257	27401	25482	23293	25531	26767	25315	12769	12530	14119	7326	7937	9577	7134	7526	7593	7585	7692	8250	20257	17545	16324	14797	15195	14466	9728	10022	17631	7232	7470	7356	7593	7770	7755	7835	8013	7401		28.0958	16557	14621	13702	10161	9317	11645	10638	9914
28.1416	51996	65929	62691	27170	25590	23116	25572	26883	25252	13102	12651	14054	7268	8199	9555	7249	7271	7349	7432	7475	8038	20229	17467	16330	14993	15075	14310	9741	10620	17798	7439	7919	7212	7565	7571	7565	8004	7858	7377		28.1416	16414	14482	13473	9878	9090	11283	10869	9877
28.1875	52600	65832	62803	27442	25342	23115	25770	26777	25068	12739	12676	14440	7417	8408	9752	7073	7288	7136	7483	7642	8111	20035	17428	16095	14877	15180	14502	10008	10479	17783	7541	7572	7345	7803	7797	7826	7947	7856	7237		28.1875	16290	14762	13686	10270	9350	11315	10621	9856
28.2333	52857	65878	61211	27679	25085	22727	25756	26695	25491	12725	12423	14253	7454	8145	9383	7438	7559	7280	7509	7828	8124	19664	17401	16100	14894	14921	14780	9687	10452	17993	7294	7684	7287	7879	7876	7606	7776	7835	7364		28.2333	16637	14686	13998	10008	9164	11450	10882	9809
28.2791	52771	65038	62446	27838	25050	23148	25335	26631	25009	12813	12861	14112	7357	8362	9585	7143	7363	7388	7619	7928	8041	20200	17490	16468	14854	15053	14556	9731	10296	17748	7291	7705	7179	7869	7789	7741	7891	7782	7212		28.2791	16441	14111	13748	10025	8949	11187	10519	9557
28.325	52640	66266	62217	26864	25452	22793	25810	26794	24969	12939	12716	14519	7208	8123	9585	7297	7600	7606	7644	7514	8007	19982	17229	16321	14773	14911	14275	9785	10147	18223	7216	7630	7416	7595	7581	7734	7685	7718	7130		28.325	16224	14303	13614	10105	9167	11199	10638	9708
28.3708	53105	65757	62527	27246	25078	23343	25800	26643	24980	13023	12872	14347	7425	8221	9534	7246	7554	7298	7698	7816	7736	20498	17083	16104	14728	15192	14739	9654	10369	17724	7387	7524	7452	7712	7610	7840	7690	7784	7233		28.3708	16593	14823	13897	10174	9396	11460	10372	9894
28.4166	53004	65487	62125	27122	25159	22901	25996	26277	25466	13073	12818	14451	7092	8391	9554	7239	7372	7320	7663	7712	7801	19883	17461	16120	14791	14744	14726	10008	10354	17865	7378	7546	7310	7878	7794	7611	7881	7814	7503		28.4166	16559	14783	13691	10289	9278	11059	10666	9773
28.4625	51847	65401	62497	27263	25720	23108	25282	26846	25380	12691	12585	14127	7344	8095	9529	7328	7429	7085	7615	7727	8033	20003	17497	16047	14653	14973	14471	9865	10498	17929	7330	7449	7064	7878	7691	7871	7676	7943	7331		28.4625	16429	14889	14118	10245	9347	11268	10863	9795
28.5083	52506	65612	61890	27292	24982	23043	25548	26784	25063	12876	12536	14678	7153	8169	9667	7400	7241	7338	7714	7463	7732	20083	17409	16094	14835	15378	14573	9727	10355	18028	7377	7460	7338	7984	7702	7799	7795	7828	7246		28.5083	16536	14861	13869	10175	9192	11261	10881	9977
28.5541	51644	65941	61686	27191	25078	23351	25656	26719	25096	12765	12755	14455	7635	8063	9984	7207	7352	7310	7572	7480	7803	19707	17495	15687	14948	15198	14476	9629	10202	17721	7217	7613	7134	7865	8011	7609	7678	7894	7354		28.5541	16441	14538	13728	10057	9296	11146	11039	9771
28.6	51461	66419	61788	27260	25520	22890	25744	26894	25110	13202	12611	14377	7289	8258	9778	7003	7553	7482	7614	7630	7929	20097	17396	15980	14887	14848	14707	9730	10426	17663	7383	7724	7437	7831	7812	8015	7893	7675	7440		28.6	16283	14008	13172	10027	8906	11116	10338	9632
28.6458	52677	65557	62355	27023	25218	23209	25790	26526	25212	13188	12881	13911	7418	8385	9660	7390	7408	7319	7637	7896	7954	20182	17353	16033	14799	15230	14824	9942	10459	17713	7374	7574	7362	7810	7761	7650	7672	7822	7523		28.6458	16514	14597	13693	10233	9270	11301	10784	9855
28.6916	52244	64654	62136	27014	25356	23308	25506	26400	25032	12578	12758	14627	7456	8132	9693	6969	7275	7459	7609	7453	7790	19960	17627	15963	14645	15247	14500	10069	10725	17968	7295	7512	7382	7748	7685	7775	7929	7760	7467		28.6916	16496	14866	13796	10262	9130	10838	10724	9920
28.7375	52724	65644	61771	27270	25011	23026	25828	27097	25253	12713	12819	14427	7451	8207	9436	7178	7479	7408	7429	7615	7970	19787	17944	15985	14861	15151	14558	9807	10519	17650	7468	7290	7122	7968	7763	7366	7683	7995	7470		28.7375	16395	14817	13792	10302	9092	11252	10873	9865
28.7833	52004	64990	61961	26908	25171	22988	25524	26698	24850	13017	12619	14411	7470	8311	9826	7278	7404	7460	7597	7530	7776	20091	17437	16258	14878	15172	14642	9766	10382	18163	7442	7598	7262	7750	7824	7753	7880	7693	7267		28.7833	16697	14739	13728	10046	9152	11080	10658	9777
28.8291	52040	65600	61967	27093	25144	23184	25604	26337	24908	13028	12820	14513	7431	8240	9584	7171	7438	7591	7456	7670	8042	20036	17796	15896	14743	14894	14883	9870	10546	18014	7447	7579	7355	7638	7524	7874	7858	7847	7417		28.8291	16262	14722	14161	10428	9160	11008	10900	9833
28.875	52348	65189	62336	26913	25637	22749	25579	26319	24957	12957	12446	14191	7557	8267	9448	7157	7463	7335	7669	7720	8001	20062	17852	15931	14787	15085	14567	9787	10400	17492	7540	7618	7290	7847	7634	7896	7859	7875	7279		28.875	16417	14689	13861	9897	9360	11277	10760	9941
28.9208	52798	65720	62206	27044	25206	22827	26005	26533	24994	12980	12470	14561	7464	8360	9820	7464	7266	7277	7419	7489	7954	19850	17573	15983	14655	14807	14624	9540	10496	17830	7267	7454	7193	7707	7964	7782	7801	7792	7120		28.9208	16414	14853	13778	10297	9046	10965	10741	9855
28.9666	52319	65551	62464	27047	25038	22932	25793	27068	25426	12821	12517	14173	7441	8255	9867	7326	7456	7326	7462	7833	8103	19860	17338	16211	15205	15178	14650	10049	10405	17884	7334	7763	7416	7875	7759	7842	7870	7936	7315		28.9666	16160	14802	13853	9970	9317	11400	11116	10029
29.0125	51885	64809	61995	27198	25368	22863	25610	26589	25307	12441	12430	14309	7356	8353	9790	7239	7432	7237	7508	7530	7695	20050	17609	15714	14725	14908	14537	9908	10531	17893	7315	7410	7420	7623	7895	7833	7934	7779	7422		29.0125	16229	15090	13989	10129	9047	11103	10825	9864
29.0583	52832	65243	62030	26929	25339	22924	25735	26608	25500	13013	12507	14359	7375	8210	9631	7039	7375	7150	7504	7483	7803	19981	17452	16003	15029	15466	14483	9724	10182	17662	7269	7415	7318	7983	7798	7718	7863	7829	7368		29.0583	16284	14767	13793	10271	9336	11206	10920	9972
29.1041	51998	65586	63031	27365	25115	22996	25734	26407	25026	13036	12252	14357	7387	8234	9672	7238	7516	7326	7448	7579	8028	19843	17232	16003	14786	15434	14854	9720	10527	17986	7111	7320	7186	7780	7695	7990	7889	7860	7347		29.1041	16642	14563	13642	10092	9262	11251	10847	9573
29.15	51866	64903	61721	27064	25231	23637	25510	26633	25063	12749	12558	14263	7542	8381	9830	7294	7479	7330	7675	7714	7796	20122	17491	15810	14810	14596	14314	10039	10587	17972	7600	7671	7412	7881	7768	7780	7851	7893	7151		29.15	16443	14688	13926	10220	9271	11399	10767	9784
29.1958	52118	65573	61772	27292	25363	22899	25479	26582	25733	12794	12404	14703	7369	8255	9461	7243	7614	7441	7504	7437	7993	20161	17269	15908	14671	14862	14640	9693	10295	17979	7241	7490	7278	7807	7597	7899	7889	7767	7313		29.1958	16325	14881	13821	10348	9334	11165	10860	9968
29.2416	52473	65148	62038	26970	25108	23413	25183	26436	25363	12816	12439	14308	7454	8375	9678	7088	7496	7287	7511	7570	7685	20240	17442	16144	15041	14987	14640	9806	10212	18099	7407	7434	7328	7599	7817	7748	7911	7974	7246		29.2416	16052	14593	13563	10401	9112	11351	10499	9733
29.2875	52469	65209	61788	27160	25314	23026	25879	26733	25173	13258	12610	14105	7336	8042	9751	7140	7411	7604	7379	7603	7762	20090	17357	16303	14541	14715	14595	9909	10347	17321	7449	7551	7309	7892	7746	7778	8024	7875	7392		29.2875	16373	14627	13717	10235	9326	11176	10756	9720
29.3333	52345	65424	62580	27225	25083	22992	24930	26374	24994	12885	12708	14460	7629	8271	9647	7156	7265	7454	7492	7572	7847	20061	17342	15898	14416	15118	14582	9919	10584	17689	7382	7662	7263	7508	7699	7897	7853	7838	7457		29.3333	16407	14607	13320	10059	9476	11300	10502	9790
29.3791	52382	65820	61679	27002	25219	23320	25453	27014	25380	12813	12691	14528	7340	8224	9911	7173	7438	7428	7589	7730	7685	20335	17379	15796	14792	14921	14565	9743	10706	17466	7443	7681	7133	7876	7764	7725	7930	7775	7446		29.3791	16349	14597	13765	10265	9329	11533	10835	9852
29.425	51841	65761	62489	27262	25470	22581	25662	26751	25204	12774	12496	14172	7344	8209	9831	7309	7346	7385	7683	7743	8036	19894	17276	15973	15040	14832	14591	9708	10424	17758	7178	7538	7120	7726	7723	7766	8053	7749	7025		29.425	16386	14647	13815	10043	9170	11127	10547	9994
29.4708	52167	65520	62543	27204	25702	22637	25442	26555	25014	13001	12622	14297	7440	8275	9826	7264	7302	7265	7540	7611	7862	19637	17745	16096	14979	14938	14397	9900	10232	18003	7298	7630	7225	7542	7814	7599	7762	7793	7313		29.4708	16573	14547	13858	10317	9206	11416	10581	9661
29.5166	52090	64714	62537	27336	24742	22932	24998	26766	25403	13076	12428	14670	7513	8242	9878	7340	7292	7405	7416	7659	7939	19866	17363	16122	15071	15257	14737	9893	10533	17777	7371	7574	7474	7657	7965	7762	7783	7810	7501		29.5166	16405	14252	13594	10353	9152	11012	10688	9670
29.5625	52252	65237	62430	27322	25007	22904	25443	26668	24918	12941	12319	14503	7335	8273	9905	7228	7423	7589	7476	7720	8025	19965	17403	15920	15088	14997	14683	9901	10242	17765	7344	7574	7360	7801	7813	7958	8045	7823	7459		29.5625	16326	14685	13782	10162	9126	11161	10808	9915
29.6083	52196	65874	62272	27113	25579	23141	25443	26514	24963	12886	12303	14487	7530	8240	9800	7275	7262	7290	7415	7632	8022	20269	17387	16028	14692	14964	14714	9933	10284	17977	7440	7427	7315	7757	7553	7699	7814	7910	7263		29.6083	16502	14791	13794	10104	9383	11064	10742	9891
29.6541	52340	65487	61819	27187	25096	22634	25478	26807	25170	12667	12444	14038	7467	8408	9741	7398	7460	7237	7659	7536	7766	20298	17340	16173	15010	15240	14425	9816	10394	17891	7318	7549	7473	7844	7844	7676	8039	7767	7279		29.6541	16463	14633	13582	10170	9244	10780	10530	9682
29.7	52429	65396	61875	26811	25581	23104	25511	26684	24950	12742	12279	14312	7343	8422	9744	7255	7611	7472	7494	7581	7885	20051	17303	15918	14887	15542	14564	9932	10152	18196	7511	7739	7207	7662	7694	7714	7763	7762	7328		29.7	16348	14573	13727	10091	9242	11208	10664	9743
29.7458	51916	65282	61876	26988	24981	22896	25737	26023	25271	12801	12444	14231	7249	8333	9689	7149	7550	7301	7658	7624	7938	19996	17660	15944	14933	14747	14641	9995	10324	18059	7468	7488	7246	7607	7818	7900	7750	7752	7417		29.7458	16265	14733	13788	10047	9108	11069	11100	9857
29.7916	52193	65816	62524	26938	25109	22820	25759	26445	25488	12507	12397	14641	7332	8235	9722	7296	7577	7431	7759	7518	7846	19788	17251	16347	14729	15019	14555	9796	10424	17898	7258	7379	7361	7723	7604	7804	7686	7975	7434		29.7916	16376	14677	13868	10337	9324	11187	10562	9837
29.8375	52115	64976	61971	27230	25116	22819	25330	26543	25347	12940	12422	14531	7383	8535	10067	7529	7453	7547	7447	7492	7865	19852	17510	16022	14635	15004	14274	10038	10298	17900	7147	7487	7147	7829	7837	7713	7715	7913	7364		29.8375	16261	14754	13855	10172	9173	11173	10819	9859
29.8833	52495	65060	61338	26904	25470	23161	25494	26613	25376	12935	12455	14185	7639	8423	9953	7295	7269	7407	7519	7647	8076	20018	17378	16194	14855	14975	14659	10255	10558	17831	7316	7500	7388	7706	7799	7670	7967	7938	7589		29.8833	16263	14521	13596	10234	9270	11176	10765	9960
29.9291	52316	65583	61915	26940	24987	23101	25378	26574	25230	12908	12454	14120	7212	8200	9954	7265	7400	7427	7562	7638	8088	19977	17356	15867	14931	14813	14472	9798	10594	17750	7211	7430	7221	7903	7543	7761	7794	7964	7258		29.9291	16539	14789	13923	10197	9190	11013	10440	9926
29.975	51977	65426	61183	27371	25235	22640	25542	26141	24810	13033	12320	14025	7398	8288	9911	7101	7438	7497	7662	7563	7923	20121	17383	15854	14898	14932	14613	9935	10454	18008	7207	7573	7439	7746	8035	7886	7774	7673	7346		29.975	16364	14820	13800	9848	9336	11264	10498	9838
30.0208	51866	65540	62639	27352	24934	22932	25363	26389	25106	12792	12305	14206	7482	8312	9817	7262	7556	7393	7499	7384	8054	19631	17201	16008	14391	15105	14433	10238	10368	17760	7355	7580	7223	7814	7826	7778	7963	7736	7349		30.0208	16308	14666	13956	10338	9286	11170	10861	9666
30.0666	51754	65667	61382	27014	24938	22580	25568	26545	25065	13115	12464	14384	7232	8274	9837	7154	7418	7281	7552	7567	7839	19920	17485	15913	14736	15018	14530	10026	10385	17745	7378	7521	7342	7803	7847	7602	7855	7899	7325		30.0666	16491	14955	13464	9898	9149	11272	10362	9817
30.1125	51685	65081	61963	27099	24988	23016	25712	26492	25228	12987	12543	14431	7338	8428	9845	6967	7397	7480	7637	7660	7760	20133	17455	15769	14698	14662	14607	9779	10542	17813	7334	7369	7373	7775	7740	7781	7726	7723	7343		30.1125	16181	14235	13377	9781	9014	11038	10541	9735
30.1583	52432	64896	61704	27385	25492	22605	25672	26728	25238	12587	12621	14150	7314	8337	9846	7371	7215	7463	7633	7707	8075	20110	17495	15910	14628	15040	14498	10090	10392	17691	7322	7472	7355	7918	7826	7876	8078	8068	7145		30.1583	16428	14641	13779	9962	9056	11160	10729	9739
30.2041	51660	65416	61556	27308	25244	23001	25823	26654	24758	12983	12270	14250	7249	8287	10071	7182	7629	7610	7572	7516	7740	19926	17444	15895	15044	15317	14602	9879	10306	17905	7350	7805	7377	7806	7771	7714	7821	7876	7248		30.2041	16461	14801	13671	9891	9167	11306	10429	9870
30.25	52189	65810	61370	27702	25489	22837	25127	26133	25061	12903	12150	14510	7291	8296	9701	7402	7474	7342	7479	7705	7871	20019	17311	15835	14783	15198	14443	10006	10356	18262	7374	7553	7213	7665	7814	7916	7889	7848	7407		30.25	16384	14884	13910	10221	9358	11243	10683	9727
30.2958	52130	65480	61287	27018	25331	22887	25953	26478	24840	12808	12044	14496	7556	8222	9809	7237	7536	7255	7581	7452	8001	19836	17182	16030	14726	14920	14395	10000	10271	17658	7424	7523	7339	7706	7681	7698	7723	7819	7292		30.2958	16266	14473	13641	9865	8962	11448	10649	9655
30.3416	52587	65321	61508	26705	25375	22628	25503	26340	24725	12734	12444	14209	7249	8342	9893	7029	7277	7401	7683	7528	7952	19971	17575	15799	14691	15214	14391	10027	10367	17755	7379	7510	7144	7845	7599	7803	7858	7917	7380		30.3416	16521	14678	13566	10199	8859	10985	10950	9642
30.3875	52283	65055	61458	26910	24911	22963	26050	26504	24740	12482	12162	14128	7266	8327	9925	7288	7524	7463	7538	7644	8060	19767	17341	16060	14747	14998	14443	10241	10509	17870	7214	7480	7229	7872	7615	7623	7842	7649	7251		30.3875	16475	14654	13651	9889	9139	11325	10465	9551
30.4333	52007	65674	61793	27213	25302	23207	25441	26468	25054	12644	12331	13996	7284	8372	10104	7179	7398	7322	7646	7597	7812	20107	17156	16018	14463	15197	14303	10144	10540	17592	7246	7617	7155	7817	7835	7758	8024	7880	7286		30.4333	16176	14632	13707	10325	9362	11077	10638	9864
30.4791	52054	65313	61375	27005	24784	22686	25443	26253	25147	12651	12438	14235	7468	8558	9900	7160	7419	7474	7577	7340	7852	19900	16988	16224	14546	14861	14380	10032	10542	17630	7435	7425	7176	7719	7858	7677	7979	7765	7278		30.4791	16175	14492	13910	10109	9105	10922	10632	9809
30.525	52249	66009	61229	27296	25056	22725	25508	26472	25193	12905	12191	14137	7394	8250	10103	7302	7387	7275	7454	7574	7905	19964	17578	15992	14957	14939	14499	9867	10243	17654	7208	7505	7264	7686	7883	7666	7818	7732	7364		30.525	16235	14746	13646	9959	9327	11037	10714	9598
30.5708	51595	64957	61014	27112	25240	22853	25597	26663	25308	12824	12391	14182	7450	8448	9857	7309	7534	7455	7454	7508	7703	19673	17496	16037	14549	15206	14489	9894	10575	17708	7396	7532	7431	7783	7732	7751	7994	7763	7373		30.5708	16457	14692	13686	9897	9102	10790	10699	9836
30.6166	51958	65509	61787	26575	25266	23151	25316	26396	25217	12730	12254	14217	7330	8231	9910	7257	7434	7326	7486	7490	8046	19783	17687	15720	15090	14913	14427	9971	10392	17901	7244	7673	7430	8002	7586	7792	7836	7826	7381		30.6166	16302	14569	13787	9940	9052	11003	10659	9867
30.6625	51453	65348	61045	26557	25127	22885	25384	26662	25275	12539	12135	14023	7338	8605	9983	7319	7423	7296	7536	7711	7900	19916	17738	16081	14904	15295	14622	9728	10454	17846	7239	7469	7164	7643	7566	7805	7964	7721	7465		30.6625	16450	14562	13817	10161	9143	11108	10599	9799
30.7083	51925	65621	60988	26944	25220	22669	25418	26424	25519	12502	12270	14341	7400	8250	9924	7302	7572	7533	7541	7507	7973	19918	17478	15884	14573	15010	14663	10158	10531	17720	7308	7613	7314	7563	7661	7805	7799	7549	7263		30.7083	16446	14444	13427	10157	9393	11227	10480	9521
30.7541	51798	64931	61507	26731	25074	22930	25561	26412	25041	12653	12260	14331	7502	8361	9919	7233	7394	7192	7482	7564	7835	19684	17198	15840	14830	14949	14446	10098	10546	18062	7421	7523	7328	7811	7659	7743	7897	7648	7341		30.7541	16363	14334	13378	10180	8999	11264	10327	9715
30.8	51999	65743	61357	27059	24706	22654	25532	26279	25018	12466	12308	14058	7493	8304	9811	7265	7261	7257	7537	7335	7847	20027	17657	16256	14810	14972	14466	9752	10538	17815	7186	7427	7422	7735	7935	7670	7862	7736	7240		30.8	16261	14697	13613	10073	9118	11156	10709	9784
30.8458	52817	65531	62239	27048	25291	22755	25550	26451	24896	12735	12586	13953	7430	8513	9939	7236	7637	7358	7581	7524	7951	19797	17339	15648	14682	15051	14544	9957	10349	17852	7426	7476	7176	7962	7944	7740	7818	7642	7316		30.8458	16436	14460	13641	9991	9042	10881	10713	9461
30.8916	52195	64895	61522	26609	24806	22672	24935	26653	24962	12539	12234	14067	7255	8666	9994	7077	7283	7307	7551	7444	8163	20010	17298	16107	14966	14565	14489	9984	10798	17820	7373	7504	7319	7638	7860	7533	8023	7822	7168		30.8916	16325	14615	13720	9995	9220	11178	10419	9783
30.9375	51956	65210	61066	26821	25070	22761	25340	26423	25453	12843	12156	14072	7586	8472	9916	7437	7346	7311	7662	7525	7843	19581	17481	15850	15098	14946	14481	9985	10545	18103	7304	7642	7118	7703	7684	7727	7750	7870	7394		30.9375	16450	14854	13593	10421	9289	11187	10516	9840
30.9833	52037	65140	61438	27062	25274	23091	25382	26577	24989	12543	12675	14322	7347	8418	10179	7138	7723	7391	7718	7684	7918	19841	17697	15760	14896	14979	14498	9862	10709	18020	7211	7620	7279	7881	7723	7667	7893	7684	7515		30.9833	16126	14626	13654	9966	9273	10818	10597	9674
31.0291	51893	65087	61189	26715	25365	23026	25448	26596	25322	12548	12280	14429	7551	8535	10157	7474	7280	7511	7752	7568	7833	20256	17435	15941	14733	14872	14445	10102	10404	17595	7660	7338	7377	7796	7647	7741	7848	7846	7311		31.0291	16025	14347	13674	9981	9129	10734	10363	9808
31.075	52014	64436	61637	26975	25333	23011	25153	26429	25188	12514	12366	13645	7568	8442	9916	7117	7576	7431	7585	7411	7665	19798	17201	15747	14598	14939	14652	9932	10817	17597	7301	7648	7247	7843	7759	7847	7921	7663	7318		31.075	16195	14478	13489	10076	8961	11075	10749	9820
31.1208	51922	65058	61962	26857	25031	23046	25635	26129	25310	12932	12313	14336	7516	8538	9897	7205	7485	7549	7509	7635	8026	19820	17478	15741	14693	14912	14524	10069	10615	17926	7379	7520	7098	7727	7936	7643	7819	7823	7528		31.1208	16468	14361	13561	9937	9125	10920	10337	9598
31.1666	51903	65086	61390	26683	25178	22864	25186	26184	25016	12812	12220	14272	7500	8641	9824	7310	7373	7426	7496	7627	7994	19853	17518	15958	14704	14688	14716	9887	10161	17651	7382	7450	7397	7671	7950	7646	7824	7562	7309		31.1666	16587	14549	13467	9800	9118	11129	10718	9631
31.2125	51841	65497	61575	26906	25265	23102	25521	26436	25369	12713	12556	14321	7691	8392	10304	7253	7379	7537	7578	7524	7874	19978	17490	15981	14604	15001	14536	10049	10594	18049	7321	7758	7247	7753	7776	7793	7827	7796	7362		31.2125	16433	14411	13599	10016	9026	10817	10607	9762
31.2583	51953	64906	61222	27521	25458	22547	25503	26639	25083	12838	12183	14543	7423	8556	9999	7318	7594	7496	7504	7648	7855	19901	16921	15589	14576	15046	14635	10272	10603	17847	7353	7560	7384	7831	7691	8015	7982	7638	7231		31.2583	15986	14268	13511	9915	9031	10912	10626	9668
31.3041	51846	65377	61625	27167	24873	23248	25546	26208	24759	12768	12316	14324	7534	8450	10088	7403	7496	7490	7514	7753	7865	19829	17239	15867	14841	15135	14705	9876	10590	18020	7359	7516	7470	7781	7692	7590	7742	7868	7277		31.3041	16554	14494	13771	9784	9151	11059	10932	9888
31.35	52426	65612	61776	27055	24795	22921	25319	26599	25127	12853	12344	14303	7518	8412	10228	7288	7626	7320	7791	7556	7821	20067	17399	15678	14823	14978	14427	9953	10643	17983	7298	7461	7446	7924	7803	7732	7898	7858	7317		31.35	16246	14289	13566	9695	9132	10938	10534	9607
31.3958	52269	64187	61484	27546	24945	22885	25463	26612	25224	12687	12094	13970	7483	8460	10222	7053	7625	7293	7543	7556	7697	19850	17446	15921	14429	15097	14511	10033	10404	18247	7252	7433	7214	7896	7926	7603	7579	7599	7362		31.3958	16249	14649	13316	10108	9178	11047	10527	9774
31.4416	51970	65239	62454	26866	25060	23037	25378	26475	24653	12703	12160	14086	7366	8604	10132	7199	7336	7155	7382	7485	7942	19526	17150	15899	14521	15242	14610	9816	10221	18144	7356	7567	7338	7824	7725	7627	7678	8045	7266		31.4416	16595	14499	13677	9933	9424	11200	10668	9778
31.4875	51915	65262	61342	27366	25301	23204	25248	26179	25448	12774	12054	14244	7368	8475	9930	7162	7492	7349	7608	7520	7882	19713	17324	15839	14850	14931	14616	9875	10624	18095	7303	7630	7099	7680	7687	7818	7976	7535	7306		31.4875	16429	14403	13799	10201	9304	10900	10454	9969
31.5333	51662	65341	62054	26705	24920	22891	25604	26082	24876	12761	12249	14219	7780	8695	10095	7384	7264	7177	7623	7512	7881	19981	17017	15969	14837	15004	14389	10160	10509	17873	7362	7789	7338	7652	7918	7513	7872	7775	7416		31.5333	16389	14786	13794	10331	9173	10832	10731	9496
31.5791	51497	65195	61875	26759	25404	22763	25596	26607	24792	12670	12271	14211	7524	8451	9983	7470	7363	7405	7581	7328	7992	19709	17491	16111	14661	14947	14300	9920	10257	17826	7351	7564	7328	7451	7556	7839	7777	7709	7358		31.5791	16416	14521	13888	9946	9151	11250	10702	9888
31.625	51905	65570	61342	26994	25314	22927	25789	26610	24469	12962	12217	14114	7554	8410	10239	7169	7290	7100	7392	7542	7826	19645	17649	16033	14911	14777	14537	9960	10545	17907	7399	7442	7097	7700	7635	7769	7998	7604	7437		31.625	16414	14628	13279	10372	9323	11004	10730	9843
31.6708	52482	65146	61564	27056	24967	22805	25214	26468	24995	12692	12405	14316	7675	8475	10118	7253	7552	7368	7338	7609	7766	19597	17245	15972	14530	14890	14352	9956	10617	17695	7268	7526	7360	7879	7690	7700	7970	7686	7326		31.6708	16160	14506	13591	10233	9254	11048	10448	9621
31.7166	52174	65301	61264	26833	25084	22763	25225	26688	25013	12572	12332	14121	7754	8519	9957	7295	7299	7369	7634	7581	8062	19843	17333	15882	14644	15234	14270	10171	10580	17708	7283	7634	7379	7746	7803	7566	7900	7901	7387		31.7166	16281	14642	13583	10059	9054	11154	10819	9712
31.7625	52373	65159	61613	26898	24902	22727	25203	26483	25219	12657	12249	14214	7540	8596	9976	7295	7380	7405	7435	7602	7794	19877	17075	15898	14657	14806	14378	10122	10430	18083	7386	7550	7119	7682	7803	7905	7665	7982	7261		31.7625	16278	14699	13644	9911	8969	11334	10463	9518
31.8083	52605	65144	61672	27002	25512	22916	25198	26464	25197	12709	12310	14396	7679	8784	10127	7076	7439	7145	7620	7312	7978	19828	17223	15767	14585	14866	14426	9857	10587	17714	7224	7469	7408	7875	7778	7821	7915	7736	7112		31.8083	16454	14349	13532	10026	9160	11234	10472	9670
31.8541	52048	65689	61551	27025	24983	22869	25243	26348	24775	12713	12287	14248	7619	8535	9935	7310	7400	7327	7805	7638	7746	20435	17356	15888	14645	14741	14452	9977	10473	17831	7306	7584	7400	7871	7796	7775	7953	7832	7277		31.8541	16188	14289	13570	9868	9160	11075	10679	9907
31.9	51275	64955	61207	26907	25218	22920	25461	26206	24619	12763	12078	13968	7690	8647	10165	7097	7300	7387	7442	7429	7948	19881	17595	15792	14868	14898	14418	10132	10452	18346	7313	7582	7403	7552	7685	7692	7708	7859	7193		31.9	16250	14553	13449	10071	9235	10928	10567	9866
31.9458	51738	64817	61411	27370	25208	22829	25640	26094	24695	12820	12304	14172	7724	8475	9904	7306	7558	7387	7576	7471	7905	19619	17271	16184	14775	14681	14554	10052	10322	17880	7386	7488	7228	7623	7693	7819	7839	7593	7346		31.9458	16366	14471	13435	9963	8997	11206	10490	9601
31.9916	52104	65399	61824	27334	24962	23074	25049	26581	24961	12638	12333	14076	7708	8546	10239	7233	7491	7351	7538	7463	7864	20138	17399	15985	14468	14706	14646	9922	10227	17577	7272	7464	7364	7566	7787	7678	7715	7873	7414		31.9916	16416	14632	13626	10092	9029	11027	10454	9884
32.0375	51819	64950	61036	26762	25204	22707	25162	26380	25087	12533	12377	14049	7466	8687	10290	7246	7360	7405	7424	7741	7766	20284	17106	15691	14618	14683	14309	10081	10476	18136	7509	7644	7303	7762	7729	7527	7507	7916	7408		32.0375	16446	14437	13751	9903	9226	11236	10732	9797
32.0833	51880	64579	60898	26816	25149	22764	25318	26377	24657	12766	12282	14405	7730	8516	10348	7425	7333	7314	7481	7510	7813	19928	17230	15995	14777	14921	14686	10127	10361	18225	7352	7666	7238	7700	8074	7718	7762	7698	7255		32.0833	16433	14667	13458	10153	8993	10923	10528	9787
32.1291	51864	64949	61789	27018	24902	22938	25142	26274	24661	12730	12337	13944	7756	8522	10291	7227	7428	7522	7445	7652	7749	19779	17348	15704	14512	15129	14286	9978	10760	17967	7241	7564	7318	7896	7555	7627	7744	7926	7278		32.1291	16620	14416	13736	10079	8948	10979	10693	9693
32.175	52299	65679	61032	27034	24880	22432	25420	26143	24687	12725	12273	14017	7785	8524	10449	7246	7589	7343	7454	7416	7702	20110	17670	16086	14517	15077	14528	10000	10586	17759	7301	7583	7452	8021	7785	7652	7704	7865	7307		32.175	16326	14204	13470	9893	8965	11150	10623	9746
32.2208	51423	65267	61981	27074	24928	22587	25367	26320	25008	12967	12155	14477	7814	8515	10141	7187	7494	7202	7699	7557	7824	19786	17118	16013	14887	14910	14483	10296	10695	18016	7343	7693	7429	7738	7701	7791	7679	7629	7214		32.2208	16164	14383	13621	9977	9032	10898	10576	9782
32.2666	51143	65328	61117	26973	24725	22460	25228	26318	24755	12483	12178	14318	7974	8463	10077	7397	7616	7553	7385	7600	7821	19456	17333	15922	14646	14846	14604	10297	10606	18028	7397	7248	7340	7724	7687	7830	7867	7641	7260		32.2666	16263	14423	13550	9925	9083	10978	10720	9712
32.3125	51576	65428	61611	26910	24962	22702	25635	26074	24645	12499	12081	13887	7773	8640	10145	7536	7434	7426	7689	7615	7725	19671	17432	15652	14735	15096	14570	10189	10183	18002	7484	7260	7463	7717	7752	7928	7816	7647	7311		32.3125	16289	14565	13672	9907	9237	10992	10583	9550
32.3583	52421	65199	61422	27192	25165	22602	25298	26402	24819	12765	12245	14028	7895	8470	10133	7273	7349	7179	7340	7374	7876	19891	17380	16081	14764	14753	14520	9988	10582	17926	7130	7524	7417	7758	7700	7673	7925	7583	7416		32.3583	16546	14626	13722	10135	9159	10870	10641	9844
32.4041	51683	65387	61166	27428	24645	22769	25458	26589	24886	12652	12000	14110	7948	8680	10079	7171	7141	7325	7696	7522	7994	20185	17428	16087	14756	14807	14406	9936	10374	17506	7542	7471	7589	7764	7784	7867	7753	7796	7332		32.4041	16308	14464	13709	10239	9340	11032	10721	9843
32.45	51711	64748	61441	26942	24746	22801	25424	26555	25139	12609	12355	14532	7889	8614	9867	7091	7568	7374	7533	7496	8013	19779	17374	15842	14571	15273	14610	10146	10305	17905	7268	7704	7346	7685	7853	7749	7565	7788	7502		32.45	16252	14391	13321	10104	9191	10948	10546	9568
32.4958	52425	65102	61332	27160	25502	22823	25606	26211	24492	12642	12216	13915	7999	8603	10106	7211	7468	7503	7567	7524	7941	19848	17517	15897	14728	14823	14372	10268	10526	17870	7199	7552	7318	7801	7652	7591	7688	7897	7377		32.4958	16275	14691	13693	9941	8933	11054	10637	9974
32.5416	51675	64624	60781	27220	25017	22516	25386	26369	24617	12384	12267	13922	7974	8507	10236	7335	7672	7341	7496	7388	7844	19792	17103	16017	14826	14775	14589	10114	10464	17639	7307	7565	7173	7940	7947	7824	7803	7554	7520		32.5416	16401	14260	13351	9984	8951	10708	10586	9546
32.5875	51463	65287	60605	27020	24928	22807	25302	26137	25004	12413	12210	13881	7970	8596	10157	7426	7596	7395	7580	7491	7818	19808	17362	15839	14792	14843	14186	10050	10388	17925	7461	7619	7304	7766	7718	7680	7814	7852	7366		32.5875	16460	14721	13865	9961	9286	11154	10575	9750
32.6333	51365	64593	61394	27077	25006	22276	25144	26273	24865	12780	12244	14272	8071	8687	10058	7437	7318	7236	7454	7620	8105	19887	17306	15952	14740	14900	14712	9878	10401	18097	7318	7537	7264	7817	7641	7911	7628	7628	7197		32.6333	16370	14752	13667	9950	9105	11257	10740	9783
32.6791	51922	64719	61604	27496	24718	22873	25707	26422	25048	12635	12220	13947	7940	8784	10225	7229	7485	7498	7629	7611	8024	19538	17236	16058	14776	14866	14465	10036	10607	17834	7287	7562	7275	7804	7717	7559	8023	7625	7204		32.6791	16386	14542	13599	10018	9124	11050	10744	9810
32.725	51686	64294	61220	27141	25295	22898	25814	26860	24455	13051	12271	14021	7922	8576	10281	7510	7512	7311	7573	7368	8019	19516	17421	15805	15044	14716	14361	10111	10485	18009	7188	7445	7347	7513	7723	7643	7981	7787	7278		32.725	16003	14179	13904	10141	9296	10916	10905	9845
32.7708	51825	64833	61290	27122	24886	23073	25788	25786	24554	12506	12047	14428	8266	8453	10442	7251	7521	7347	7505	7661	8149	19899	17545	16085	14884	15295	14215	10344	10452	18001	7317	7699	7295	7788	7639	7888	7907	7641	7375		32.7708	16421	14833	13251	10112	9298	11252	10684	9700
32.8166	51785	64946	61282	27098	24885	22525	25438	26282	25108	12585	12295	14257	8222	8704	10153	7474	7301	7264	7520	7679	7924	20041	17394	15796	14883	14707	14582	9975	10541	17838	7167	7531	7360	7742	7724	7832	7696	7656	7399		32.8166	16453	14485	13599	9797	9205	10838	10776	9647
32.8625	52185	64973	61299	26967	24657	22760	25453	25953	25072	12764	12246	14215	8193	8772	10492	7208	7210	7508	7347	7660	8075	19933	17339	16090	14826	14770	14587	9978	10423	17890	7342	7544	7425	7980	7853	7900	7779	7745	7485		32.8625	16364	14502	13567	9908	8986	10853	10855	9901
32.9083	51535	64651	61471	27152	25030	22726	25247	26746	24553	12492	12262	14214	8321	8591	10555	7443	7326	7291	7680	7760	7854	20185	17654	15741	14528	14991	14590	10226	10598	18023	7239	7566	7457	7981	8055	7855	7732	7921	7325		32.9083	16347	14631	13649	10011	9223	11265	10628	9683
32.9541	51039	65232	61124	26940	24703	22985	25619	26297	24993	12588	12196	14197	8301	8431	10326	7302	7302	7279	7539	7669	7769	19722	17007	15743	14686	14958	14395	10277	10577	17922	7465	7496	7494	7853	7842	7678	7735	7730	7478		32.9541	16211	14514	13507	10000	9147	10968	10710	9878
33	52131	64798	60354	26949	24677	22217	25424	27003	24642	12585	12396	14139	8193	8660	10095	7384	7431	7296	7473	7368	8017	19947	17514	16034	15023	14887	14647	9921	10620	17993	7232	7550	7138	7676	7998	7876	7698	7914	7155		33	16401	14587	14087	10128	9224	10874	10560	9645
33.0458	52507	64798	61021	27158	24613	22465	25651	26401	24964	12857	12060	14235	8549	8691	10186	7285	7223	7332	7791	7381	7829	20162	17495	15598	14526	14758	14495	10178	10368	17780	7298	7549	7535	7730	7884	7646	7850	7881	7192		33.0458	16048	14231	13541	9943	8973	10979	10476	9729
33.0916	52484	64644	61129	26879	24894	22481	25965	26227	24685	12713	12254	14136	8115	8655	10417	7188	7606	7357	7416	7435	7948	20354	17295	15642	14614	14862	14631	10303	10573	17886	7372	7308	7191	7781	7812	7953	7783	7846	7204		33.0916	16585	14443	13665	9921	9132	11154	10565	9555
33.1375	51529	64495	61288	26841	25319	22815	24901	26486	25335	12804	12443	14031	8377	8752	10234	7348	7457	7339	7457	7601	7847	19927	17258	15956	14922	14826	14692	9992	10624	17811	7352	7625	7427	7724	7885	7767	7817	7902	7380		33.1375	16130	14319	13458	9910	8655	10667	10490	9669
33.1833	51366	64307	61363	26777	24890	22950	25639	26697	24777	12440	12069	14288	8346	8753	10384	7455	7418	7350	7513	7365	7749	19541	17723	16149	14405	14632	14281	10143	10470	18139	7475	7632	7425	7699	7581	7664	7570	7793	7168		33.1833	16521	14512	13276	9885	9033	10732	10566	9797
33.2291	51743	64842	60490	26957	25173	22627	25147	26650	24838	12647	11937	13990	8574	8640	10304	7226	7326	7338	7559	7364	7895	19814	17318	15737	14666	14973	14227	10046	10459	18102	7333	7542	7196	7708	7914	7633	7702	7762	7269		33.2291	16404	14798	13532	10101	9029	11014	10791	9992
33.275	51440	64539	61031	27093	25258	23041	25439	26347	24639	12775	12077	14055	8370	8574	10255	7415	7440	7293	7633	7636	8051	19728	17267	15852	14588	14638	14194	9989	10480	17562	7255	7630	7428	7760	7789	7614	7880	7615	7362		33.275	16291	14674	13651	10095	8983	11068	10823	9903
33.3208	51391	64078	61219	27210	24878	22593	25178	26713	24766	12392	12282	14287	8492	8730	10310	7229	7524	7349	7597	7483	7859	19918	17030	15623	14736	14823	14680	9873	10147	18205	7285	7844	7367	7780	7820	7851	7725	7801	7472		33.3208	16227	14637	13869	10097	8986	11076	10684	9703
33.3666	51524	64738	60933	26885	25122	22738	25635	26117	25029	12659	12099	14339	8286	8919	10482	7216	7505	7581	7436	7608	7995	19714	17537	16014	14726	14829	14349	10013	10398	17976	7366	7693	7199	7543	7693	7702	7686	7868	7337		33.3666	16244	14457	13762	10092	9133	10828	10519	9491
33.4125	51663	65265	61112	26919	25054	22557	25200	26167	24596	12655	12050	13878	8499	8949	10467	7434	7456	7313	7442	7513	8026	19583	17796	15728	14562	15123	14641	10123	10367	17906	7200	7440	7498	7422	7865	7770	7678	7874	7357		33.4125	16223	14684	13294	10118	9003	11245	10690	9822
33.4583	52594	64789	61580	27063	24828	22563	25316	26154	24557	12832	12430	14224	8433	8748	10466	7225	7162	7453	7586	7696	7886	19784	17692	15934	14667	14825	14425	10131	10647	18225	7329	7679	7315	7599	7688	7725	7771	7888	7480		33.4583	16212	14665	13724	10096	9326	10983	10722	9671
33.5041	52031	65247	60975	27241	24834	22913	25488	26015	24876	12615	12541	14057	8798	8580	10157	7394	7497	7370	7659	7656	8250	19898	16997	15705	14592	14871	14623	10064	10483	18216	7391	7648	7349	7476	7779	7608	8003	7799	7458		33.5041	16371	14589	13826	9957	8922	10713	10582	9605
33.55	52136	64494	60538	26694	24883	22718	25267	26377	25116	12447	12092	14405	8565	8667	10093	7213	7371	7495	7494	7452	7867	19965	17127	15791	14641	15187	14453	10066	10571	17732	7567	7376	7398	7783	7958	7724	7670	7658	7409		33.55	16194	14892	13684	9981	9046	11075	10433	9805
33.5958	52002	64918	61412	26901	24911	22697	25257	26456	25202	12759	12116	14211	8645	8854	10551	7198	7399	7302	7588	7624	7923	20112	17234	15955	14885	14671	14656	9980	10372	17902	7366	7406	7381	7529	7799	7695	7650	7852	7381		33.5958	16670	14439	13727	10127	8821	11115	10629	9770
33.6416	52005	64018	61399	27286	24511	22931	25136	26262	25039	12307	11887	14033	8772	8808	10337	7561	7281	7369	7519	7510	7890	19860	17127	15799	14522	14815	14326	10079	10268	18044	7288	7415	7524	7665	7773	7678	7647	7603	7475		33.6416	16402	14715	13534	9963	9143	10844	10535	9622
33.6875	51615	64754	61527	26866	25223	22791	25904	26462	24817	12462	11988	14434	8754	8744	10552	7293	7346	7318	7461	7834	8003	20153	17386	15936	14707	14692	14326	10182	10320	17743	7328	7587	7168	7420	7692	7694	7772	7601	7317		33.6875	16429	14491	13568	9822	8932	10928	10604	9739
33.7333	52184	65100	61642	26799	24844	22701	25458	26682	24932	12452	12317	14286	8783	8911	10550	7337	7189	7496	7825	7613	7900	19943	17210	15815	14751	14924	14321	10385	10446	17957	7262	7545	7216	7951	7799	7910	7837	7606	7200		33.7333	16058	14605	13634	9943	9110	11175	10584	9730
33.7791	51729	64894	60844	26849	25011	22700	25199	26395	24648	12464	12084	14182	8705	8697	10317	7159	7379	7247	7532	7868	7958	19709	17524	16127	14801	14883	14421	10051	10483	18018	7386	7291	7488	7764	7745	7884	7656	7698	7166		33.7791	16374	14703	13513	10239	8939	10980	10848	9783
33.825	51768	64889	61159	26931	24625	22893	25650	26466	24488	12367	12120	13827	8935	8895	10333	7250	7444	7231	7493	7616	7870	19908	17481	15850	14661	14937	14358	9908	10612	17862	7346	7553	7325	7748	7652	7857	7839	7712	7385		33.825	16543	14736	13991	9894	9157	11157	10685	9783
33.8708	51536	65175	61027	27089	24737	22286	25280	26081	24885	12569	11946	13994	8481	8947	10339	7328	7476	7552	7652	7551	7722	19880	17330	15843	14743	14723	14506	10448	10776	18004	7282	7294	7205	7551	7860	7683	7670	7728	7311		33.8708	16272	14382	13493	10149	9169	11165	10600	9850
33.9166	52265	65294	61328	27081	25060	22571	25194	26557	24854	12562	12202	14047	8873	9053	10682	7366	7287	7240	7444	7577	7923	20020	17402	15476	14549	14964	14341	10480	10799	18142	7217	7365	7432	7633	7803	7730	7836	7603	7207		33.9166	16397	14467	14070	10037	8840	11217	10511	9678
33.9625	51225	64763	60750	27390	25123	22530	25110	25891	24806	12716	12076	14160	8913	8916	10419	7109	7441	7166	7632	7435	7799	19946	17298	15986	14657	14722	14675	10424	10786	17648	7429	7370	7411	7557	7664	7914	7956	7629	7236		33.9625	16397	14703	13624	9975	9116	10683	10535	9839
34.0083	51861	65374	61599	27090	24845	22489	25362	25835	24949	12743	12261	14001	8922	8954	10274	7520	7451	7560	7660	7477	8174	19665	17296	15928	14675	14967	14371	10193	10505	17706	7268	7434	7444	7575	7853	7646	7705	7573	7291		34.0083	16433	14590	13719	10158	9146	10844	10492	9800
34.0541	51677	64140	61868	27153	24954	22537	25686	26438	25163	12602	12251	13951	8877	8878	10197	7315	7376	7290	7866	7578	7820	19989	17467	15471	14788	14710	14282	10225	10802	17806	7122	7541	7269	7870	7786	7559	7885	7745	7343		34.0541	16280	14630	13603	10083	8751	10777	10351	9680
34.1	51671	65030	60783	26779	24772	22468	25244	26396	24688	12550	12307	14483	8967	8896	10510	7267	7264	7537	7544	7690	8085	19747	16824	16072	14701	14957	14394	10459	10550	17787	7450	7643	7303	7736	7669	7821	7776	7807	7257		34.1	16176	14774	13633	10321	8943	10837	10740	9755
34.1458	51622	64855	61018	26726	24942	22668	25260	26512	24905	12535	12187	13992	8950	8744	10353	7276	7535	7229	7348	7557	7768	19837	17078	15681	14624	15018	14428	10178	10284	17940	7357	7379	7359	7628	8093	7791	7694	7626	7504		34.1458	15981	14740	13552	10103	8988	11174	10559	9593
34.1916	51317	64685	60371	26815	24646	22651	25291	26246	24825	12424	12232	14051	8744	8895	10273	7328	7442	7285	7526	7531	7991	19754	17058	16272	14624	14956	14303	10049	10716	17770	7429	7550	7397	7689	7589	7660	7917	7728	7233		34.1916	16171	14639	13565	10067	8987	10872	10678	9687
34.2375	51579	64745	60307	26568	24889	22399	25332	25996	24701	12437	11727	14006	8984	8750	10449	7270	7400	7342	7485	7678	7730	20216	17090	15738	14683	15052	14307	10597	10290	18123	7392	7398	7327	7756	7566	7651	7840	7836	7342		34.2375	16485	14532	13632	10156	9218	10987	10546	9979
34.2833	51497	65052	61052	27047	24658	22844	25261	26401	24822	12458	12056	14328	9129	9019	10680	7418	7549	7461	7342	7364	7932	19604	17370	15718	14855	14854	14618	10330	10498	17848	7205	7456	7337	7713	7499	7823	7578	7756	7491		34.2833	16368	14828	13634	9902	9034	10877	10446	9932
34.3291	51724	65105	60793	26861	24594	22494	25146	26889	24532	12744	12078	14316	9159	8830	10463	7497	7363	7435	7551	7631	7991	19481	16995	15997	14722	14797	14176	10249	10405	18002	7504	7603	7415	7627	7590	7711	7664	7743	7185		34.3291	16074	14583	13652	10352	9030	10821	10579	9800
34.375	51207	64542	61308	27150	24638	22934	25226	25697	24716	12602	11943	14345	8945	8901	10314	7151	7301	7333	7503	7575	7759	19581	17462	15911	14725	14647	14368	10040	10391	18138	7241	7465	7168	7814	7583	7749	8010	7502	7196		34.375	16394	14490	13799	10187	9215	11073	10631	9665
34.4208	52094	64781	60487	26862	24484	22448	25280	26341	24646	12296	11822	14208	9184	8716	10342	7247	7308	7379	7600	7664	7767	20125	17355	15946	14735	14630	14232	10090	10556	17613	7406	7436	7323	7732	7938	7762	7737	7891	7366		34.4208	16391	14672	13744	10242	9059	10988	10532	9565
34.4666	51792	64619	61011	26927	24962	22253	25084	26041	24689	12525	12330	14177	9089	8766	10392	7245	7527	7371	7469	7468	7807	20010	16973	16054	14670	14819	14555	10186	10657	17974	7205	7370	7334	7801	7836	7569	7761	7736	7514		34.4666	16117	14647	13624	10199	8794	10841	10580	9939
34.5125	52311	64920	60777	26672	24619	22530	25398	26260	24943	12398	12098	14431	9020	9009	10684	7288	7283	7616	7615	7393	7929	19687	17377	15900	14564	14890	14257	10213	10457	17729	7365	7199	7621	7620	7573	7581	7731	7922	7279		34.5125	16171	14594	13885	9993	8670	10862	10751	10036
34.5583	51686	64785	60848	26832	24308	22824	25080	26341	25026	12565	11849	14156	9485	8953	10504	7287	7374	7374	7558	7592	7793	19774	17240	15936	14348	14860	14661	10420	10893	17837	7260	7611	7126	7773	7801	7714	7656	7679	7467		34.5583	16183	14779	13881	10121	8958	10992	10765	9753
34.6041	51581	64451	61100	26751	24981	22771	25188	26207	24796	12509	11778	14048	9144	8950	10283	7175	7174	7301	7580	7596	7899	19801	16893	15827	14523	14691	14254	9919	10344	18234	7204	7521	7278	7675	7617	7756	7939	7647	7375		34.6041	16449	14305	13620	9919	8940	11032	10591	9947
34.65	51446	64760	60881	26537	24770	22669	24958	25902	24713	12662	12149	14103	9342	8793	10462	7268	7577	7339	7473	7473	7930	19992	17126	15784	14339	15020	14658	10366	10842	17850	7429	7457	7360	7687	7608	7610	8036	7798	7396		34.65	16189	14502	13718	10172	9147	10845	10433	9665
34.6958	51766	64728	61346	26918	24970	22264	25176	26439	25030	12478	12015	14007	9399	8799	10596	7148	7632	7405	7847	7584	7857	20129	17277	15863	14628	14742	14440	10098	10590	17857	7312	7587	7243	7803	7770	7717	7746	7710	7203		34.6958	16352	14665	13791	9939	9246	10860	10298	9714
34.7416	51654	65157	60538	26569	24725	22278	25533	26632	24859	12511	11968	14293	9352	9034	10390	7239	7442	7310	7718	7412	7893	19745	17141	15721	14667	14640	14359	10350	10522	17743	7193	7459	7254	7702	7883	7765	7844	7818	7377		34.7416	16122	14273	13110	9781	9018	10955	10630	9584
34.7875	51143	64073	61313	26868	24834	22441	25543	26322	24738	12385	12293	14014	9296	8934	10370	7208	7336	7468	7597	7460	7933	19505	17129	15732	14782	14772	14904	9994	10650	17828	7178	7547	7169	7710	7714	7757	7785	7729	7356		34.7875	16213	14477	13715	10176	8832	10899	10769	9904
34.8333	51472	63807	60890	27033	24697	22413	25333	26193	24687	12632	12309	14165	9309	8932	10402	7301	7420	7309	7425	7698	7837	19815	17302	15884	14652	14663	14502	10190	10582	17983	7352	7495	7347	7565	7779	7819	7891	7688	7309		34.8333	16136	14685	13753	10159	8895	10998	10553	9555
34.8791	51135	64097	60788	26615	24648	22256	25330	26315	24636	12498	12197	13717	9321	8923	10259	7272	7332	7514	7540	7526	7712	19908	17027	15999	14531	14831	14374	10206	10548	18134	7337	7412	7446	7289	7707	7632	7884	7707	7316		34.8791	16074	14240	13652	9985	8789	10891	10437	9587
34.925	51091	63280	60710	26530	24888	22615	25577	26247	24265	12506	12315	14149	9524	8856	10720	7318	7513	7270	7778	7488	7792	19634	16934	15722	14666	14810	14410	9972	10436	18170	7341	7736	7193	7567	7664	7725	7949	7794	7327		34.925	16273	14702	13652	10071	9229	10832	10788	9737
34.9708	52284	64513	59893	26855	25059	22452	25528	26194	24600	12275	12199	14334	9436	8856	10623	7429	7424	7479	7390	7529	7788	19954	17425	15770	14435	14787	14466	10139	10583	17796	7128	7533	7220	7501	8025	7756	7826	7789	7377		34.9708	16180	14405	13673	10034	9158	10859	10723	9822
35.0166	51587	64167	60957	26913	24389	22276	25497	26082	25039	12538	11896	14168	9338	8666	10550	7416	7700	7202	7615	7503	8032	19798	17285	15756	14721	14867	14440	10397	10464	18015	7078	7751	7313	7818	7798	7731	7749	7659	7260		35.0166	16245	14749	13535	10111	8899	11022	10675	9565
35.0625	51181	64404	60633	26814	24534	22591	25355	26303	24756	12439	12208	13971	9422	9066	10432	7100	7393	7398	7478	7818	8042	19941	17482	15759	14789	14769	14285	10238	10612	17912	7555	7656	7517	7651	7755	7470	7948	7667	7231		35.0625	16305	14685	13743	10373	9104	10982	10665	9682
35.1083	51292	64277	61141	26520	24864	22313	24889	26246	24500	12364	12194	13853	9229	9059	10241	7319	7386	7282	7500	7448	7933	19754	17441	15851	14545	14967	14286	10008	10525	17808	7324	7662	7426	7854	7825	7802	7884	7781	7252		35.1083	16530	14452	13645	10224	9122	10807	10862	9748
35.1541	52235	64815	61221	27005	25038	22844	25611	26363	24676	12808	12082	14191	9426	8915	10321	7114	7348	7425	7592	7448	8068	19811	17310	15916	14421	14827	14555	10214	10653	17640	7246	7558	7484	7733	7781	7785	7726	7531	7413		35.1541	16508	14420	13661	10098	8989	10758	10613	9844
35.2	51653	64676	60220	26666	24693	22582	25396	26154	25210	12558	11980	14148	9610	9156	10333	7309	7348	7406	7647	7678	8043	20131	17291	15990	14716	14782	14607	10203	10342	18025	7391	7532	7157	7586	7642	7704	7835	7941	7271		35.2	16376	14375	13810	9880	9057	10700	10407	9920
35.2458	51222	64615	61061	26281	24525	22559	25565	26097	24549	12720	12017	13972	9604	9048	10487	7462	7579	7416	7670	7557	8025	19742	17024	15541	14899	14511	14538	9950	10450	17921	7292	7319	7336	7842	7598	7675	7810	7741	7316		35.2458	16146	14540	13922	9979	9189	10701	10766	9642
35.2916	51948	64534	61238	26770	24819	22721	25029	26428	24788	12393	12045	13902	9706	9059	10642	7225	7431	7142	7698	7308	7936	19880	17217	16055	14827	14820	14426	10339	10585	18161	7144	7597	7151	7806	7706	7749	7830	7948	7303		35.2916	16282	14481	13572	9920	9080	10884	10753	9797
35.3375	51585	64410	60887	27036	24828	22258	24879	25941	24871	12539	12009	13962	9764	8721	10361	7253	7439	7368	7386	7639	8098	20117	17034	15974	14807	14763	14450	10096	10555	17410	7320	7517	7166	7791	7743	7742	7831	7738	7270		35.3375	16385	14399	13772	10116	8793	10683	10481	9922
35.3833	51215	65402	61038	26631	24538	22461	25547	26169	24644	12405	11927	13840	9673	8987	10763	7185	7544	7428	7615	7502	8041	19832	17274	15628	14625	14804	14729	9936	10551	17523	7400	7461	6972	7688	7547	7627	7609	7632	7295		35.3833	16350	14680	13691	9965	9082	10682	10587	9742
35.4291	51489	64427	60324	26899	24877	22227	25306	26406	24713	12546	12094	14216	9548	9029	10424	7288	7360	7329	7664	7671	7791	19779	17390	15964	14460	15011	14442	10034	10569	17821	7426	7817	7354	7688	7702	7785	7760	7807	7412		35.4291	16321	14550	13832	10049	8877	10682	10633	9731
35.475	51870	64711	60666	26910	24285	22722	25168	26118	24924	12664	11860	14065	9791	9136	10545	7111	7336	7296	7371	7511	7990	19891	16976	15854	14645	14609	14290	10198	10757	18080	7349	7475	7224	7617	7607	7545	7698	7677	7258		35.475	16324	14523	13710	10168	8878	10698	10613	9678
35.5208	51790	64771	60985	26940	24699	22695	25165	26366	24852	12564	12162	13933	9777	9009	10191	7473	7445	7373	7521	7553	7721	19958	17467	15818	14787	14861	14392	10235	10965	17687	7342	7469	7040	7850	7672	7636	7807	7720	7365		35.5208	16317	14606	13524	10104	8939	10904	10517	9594
35.5666	51995	63949	60184	26739	24649	22414	25058	26319	24420	12647	12015	13952	9949	8976	10375	7451	7347	7421	7429	7556	8190	19840	17026	15358	14499	14784	14579	10353	10722	17625	7393	7517	7459	7631	7618	7816	7993	7818	7406		35.5666	16280	14434	13970	10082	9017	11010	10662	9995
35.6125	51577	64708	60872	26628	24622	22409	24936	26476	24653	12829	12235	14137	9946	8915	10457	7492	7402	7563	7508	7515	8001	19881	17306	15941	14794	14709	14427	10299	10758	17866	7277	7548	7243	7674	7749	7539	7897	7789	7456		35.6125	16475	14650	13486	9908	8796	10890	10482	9818
35.6583	50867	64047	60427	26485	24871	22664	25560	26422	24438	12374	11955	14115	10049	9119	10676	7500	7331	7384	7558	7597	8078	19895	17339	15710	14858	14790	14700	10318	10478	17761	7372	7504	7311	7573	7619	7711	7618	7674	7376		35.6583	16227	14441	13528	10119	8873	11193	10682	9487
35.7041	51111	64375	60334	26704	24530	22087	25093	26017	24556	12478	12146	13897	9794	8869	10816	7298	7511	7565	7570	7350	7985	19857	17096	15854	14664	14606	13950	10044	10512	17569	7462	7342	7433	7811	7627	7717	7817	7756	7438		35.7041	16186	14659	13674	9884	8964	10828	10700	9599
35.75	50993	64236	60701	26922	24459	22726	25532	26059	24572	12543	11984	13949	9831	9088	10284	7042	7179	7360	7522	7516	7985	19415	16926	15781	14623	14670	14251	10101	10471	17917	7394	7465	7262	7529	7838	7497	7642	7688	7369		35.75	16558	14456	13361	10013	8850	10987	10546	9781
35.7958	51206	63988	60585	26247	24731	22403	25535	26301	24869	12797	12212	13876	10107	9087	10480	7562	7343	7284	7665	7669	7858	19984	17072	15562	14723	14713	14516	10063	10754	18120	7205	7643	7471	7655	7937	7657	7830	7849	7112		35.7958	16403	14413	13647	10104	8952	10726	10901	9685
35.8416	51233	64680	60530	27221	24677	22293	25539	26240	24641	12340	11680	14182	10228	8839	10472	7279	7478	7296	7760	7700	7926	19977	17334	16036	14918	14855	14106	10282	10533	17831	7320	7615	7171	7636	7555	7676	7780	7694	7401		35.8416	15756	14453	13856	10025	8640	10808	10797	9831
35.8875	51798	64972	60984	26875	24527	22299	25085	26379	24546	12300	12050	13896	10115	8925	10437	7132	7453	7261	7504	7553	7957	19664	17256	15901	14663	14886	14374	10071	10810	17791	7288	7447	7189	7827	7816	7934	7863	7797	7536		35.8875	16437	14443	13846	9905	9120	10710	10688	9905
35.9333	51265	64643	60657	26816	24076	22569	25235	25974	24808	12821	12095	13990	10172	9079	10617	7367	7446	7256	7835	7657	7966	20136	17241	15824	14479	14989	14537	10122	10786	17872	7469	7521	7213	7564	7730	7678	7792	7812	7575		35.9333	16123	14486	13674	9908	9029	11206	10700	9823
35.9791	51828	65031	60729	26949	24608	22654	25315	26177	24706	12500	11884	14043	9959	8957	10545	7296	7547	7385	7595	7381	8022	19646	16875	15909	14599	14726	14328	9953	10567	18007	7431	7561	7370	7624	7661	7619	7613	7412	7617		35.9791	16349	14695	13632	10339	8911	10959	10522	9717
36.025	51095	64193	60855	27031	24425	22375	25410	26547	24717	12365	11785	14120	9978	9038	10372	7521	7390	7275	7488	7694	7832	20030	17353	16064	14816	14216	14474	10090	10388	17949	7272	7394	7388	7534	7567	7969	7776	7648	7353		36.025	16435	14444	13404	10090	8879	10762	10707	9848
36.0708	51555	64837	60569	26846	24578	22459	24989	26327	24634	12760	11761	14108	10017	9065	10330	7282	7571	7325	7486	7499	8118	20034	17487	15639	14589	14530	14616	10099	10596	17598	7406	7534	7335	7839	7886	7582	7753	7877	7196		36.0708	16324	14498	13434	9910	8925	10734	10464	9582
36.1166	51672	64510	61249	26773	24533	22848	25434	26361	24586	12470	11860	13808	10074	8905	10495	7422	7500	7429	7365	7382	8061	20095	17325	15722	14485	14828	14794	10127	10852	17624	7355	7660	7398	7882	7502	7635	8025	7741	7562		36.1166	16538	14539	13523	10181	9139	10990	10494	9671
36.1625	51468	64579	60708	26900	24517	22315	25297	26160	25131	12568	11837	14142	10342	9089	10608	7167	7471	7293	7628	7461	8055	19592	17143	15642	14490	14790	14990	10292	10852	17921	7606	7580	7209	7652	7869	7752	7926	7712	7286		36.1625	16533	14464	13725	9935	9070	10653	10682	9717
36.2083	51943	64016	60385	27425	24744	22496	25287	25714	24569	12749	11715	13915	10057	8894	10480	7240	7360	7596	7616	7401	7943	19902	17148	15770	14608	15006	14148	10397	10881	17945	7415	7400	7289	7494	7903	7890	7825	8042	7259		36.2083	16278	14555	13647	10292	8938	10889	10615	9699
36.2541	51087	64088	60937	27397	24712	22330	25196	26318	24639	12404	12005	13763	10172	9080	10568	7332	7556	7509	7457	7692	7923	19632	16837	15801	14608	14585	14539	10220	10703	17915	7379	7466	7227	7642	7847	7707	7686	7815	7105		36.2541	16189	14306	13743	9942	8744	10924	10627	9844
36.3	51522	64039	61077	26890	24638	22398	24976	26239	24131	12560	11951	13969	10318	8951	10732	7296	7600	7335	7727	7438	7920	19752	17271	15847	14608	14545	14001	10472	10684	17929	7357	7691	7331	7511	7830	7750	7696	7766	7117		36.3	16226	14254	13741	9866	9322	10673	10504	9628
36.3458	51455	64656	60817	26979	24376	22424	24818	26281	24571	12451	11919	14002	10389	9137	10246	7499	7460	7249	7528	7760	7822	19622	16947	15884	14675	14688	14505	10422	10615	17695	7253	7620	7278	7668	7729	7514	7964	7724	7316		36.3458	16115	14274	13390	10038	9072	11086	10393	9618
36.3916	51131	64398	60263	27398	24971	22339	25101	25942	24860	12638	12115	14136	10226	9128	10649	7417	7501	7497	7312	7564	8035	19828	16973	15755	14621	14786	14349	10184	10587	18154	7390	7543	7277	7583	7692	7951	7898	7812	7457		36.3916	16281	14494	13639	9936	9210	10911	10833	9573
36.4375	51204	64279	60383	27025	24642	22681	25320	25862	24565	12444	12022	14022	10197	9034	10389	7344	7369	7322	7659	7738	7957	19792	17133	15526	14566	14712	14657	10079	10489	18023	7227	7396	7397	7491	7829	7724	7882	7798	7245		36.4375	16186	14736	13637	9963	8969	10891	10376	9859
36.4833	51530	63518	60532	27099	24433	22592	25180	26088	24724	12537	11875	14193	10276	9057	10293	7387	7685	7342	7630	7487	7868	19456	17444	15688	14617	14622	14439	10207	10632	17697	7342	7462	7291	7724	7772	7537	7951	7698	7231		36.4833	16385	14406	13604	10130	9333	10593	10501	9340
36.5291	51623	65030	59735	27406	24829	22169	24999	25719	24385	12512	12066	13947	10389	9088	10399	7238	7510	7131	7545	7469	7887	19520	17331	15796	14738	14821	14178	10256	10700	17860	7463	7349	7482	7591	7822	7648	7913	7591	7304		36.5291	16181	14684	13413	10066	8921	10972	10689	9673
36.575	51426	64407	60088	26861	24628	22703	24616	26636	24671	12669	12107	13766	10329	9494	10392	7277	7594	7357	7511	7415	7923	19725	17486	15867	15011	14632	14607	10163	10567	17704	7162	7400	7515	7779	7878	7814	7755	7718	7493		36.575	16554	14395	13658	10169	8893	10872	10498	9577
36.6208	52038	64429	60165	26937	24661	22361	25284	26168	24920	12305	11672	13802	10375	9252	10171	7076	7288	7343	7366	7667	7868	19754	16911	15944	14569	14585	14513	10195	10538	17787	7307	7618	7550	7721	7675	7651	7722	7736	7187		36.6208	16234	14365	13779	9932	9077	10762	10443	9922
36.6666	51438	63994	60621	26974	24968	22267	25451	26397	24653	12558	11865	14192	10293	9312	10269	7303	7613	7410	7680	7519	7910	19745	17153	15800	14817	14616	14340	10450	10538	17910	7419	7544	7403	7619	7785	7850	7782	7764	7289		36.6666	16305	14453	13586	10254	8815	10972	10599	9833
36.7125	51316	64343	60338	27195	24084	22362	25241	26347	24572	12552	11909	13921	10371	9045	10519	7338	7366	7312	7743	7409	8063	19922	17023	15871	14732	14497	14598	10286	10566	18025	7309	7566	7487	7567	7758	7571	7830	7814	7376		36.7125	16354	14425	13559	9957	9135	10879	10501	9980
36.7583	51167	63936	60293	27180	24194	22147	25146	26108	24828	12511	11754	14073	10345	9251	10641	7516	7436	7299	7591	7640	7992	19503	16978	15606	14839	14965	14471	10424	10751	18132	7498	7665	7289	7453	7782	7647	7604	7899	7418		36.7583	16474	14271	13807	10110	8858	10911	10640	9570
36.8041	51387	63577	60422	26691	24380	22363	25083	26311	24178	12532	11874	13866	10366	9192	10586	7245	7534	7538	7607	7421	7952	19972	16588	15475	14875	14733	14520	10233	10766	18202	7232	7479	7243	7634	7606	7704	7819	7872	7331		36.8041	16367	14603	13436	9776	9195	10885	10588	9608
36.85	51979	64663	60733	26754	24337	22562	25065	25717	24585	12336	12034	13858	10222	9216	10537	7277	7546	7403	7581	7568	8008	19849	16856	15618	15075	14563	14684	10184	10926	17935	7487	7626	7474	7579	7645	7591	7803	7771	7207		36.85	16259	14651	13583	10073	8999	10846	10601	9891
36.8958	51521	63867	60427	27130	24499	21855	24669	26173	24561	12417	11833	13822	10420	9432	10738	7285	7445	7353	7566	7623	7918	19647	17242	15607	14714	14463	14250	10519	10917	17940	7545	7206	7207	7669	7890	7794	7816	7842	7540		36.8958	16390	14443	13582	9944	8999	11007	10596	9641
36.9416	51564	64104	60403	26623	24526	21991	25407	26191	24855	12282	11719	13871	10462	9212	10605	7314	7341	7328	7376	7355	7790	19522	17219	15589	14703	14408	14438	10310	10871	17798	7300	7191	7139	7750	7860	7784	7478	7649	7190		36.9416	16475	14323	13430	9693	9094	10867	10653	9668
36.9875	50972	64114	60403	26798	24484	22505	25195	26477	24913	12604	11868	14154	10530	9263	10399	7202	7442	7316	7487	7653	8040	19813	16969	15411	14459	14776	14153	10338	10390	17883	7249	7669	7319	7461	7856	7719	7975	7758	7374		36.9875	16035	14328	13609	9723	8941	10873	10412	9781
37.0333	51586	64490	60323	26624	24523	22353	24922	26326	24837	12498	11682	14163	10515	9028	10533	7444	7427	7115	7365	7499	8072	19808	16750	15987	14822	14783	14261	10279	10787	18060	7488	7578	7220	7529	7695	7856	8035	7753	7345		37.0333	16488	14303	13643	9999	8959	10806	10653	9770
37.0791	51769	64577	60331	26867	24209	22575	25299	26379	24655	12369	11820	13991	10634	9163	10607	7512	7511	7320	7643	7538	7986	19599	17372	15679	14515	14478	14403	10458	10604	18174	7266	7312	7130	7789	7752	7721	7924	7579	7320		37.0791	16426	14303	13721	9817	8992	10639	10506	9668
37.125	52350	64677	60264	27098	24546	22048	25215	26200	24559	12427	12096	14189	10586	9023	10415	7350	7311	7221	7616	7456	7975	19452	17224	15876	14746	14710	14163	9980	10819	17637	7310	7375	7227	7760	7850	7613	7945	7982	7212		37.125	16071	14161	13382	9794	8856	10830	10607	9711
37.1708	51878	64391	60242	26725	24247	22273	25001	26242	24720	12574	11944	13729	10633	9257	10552	7178	7223	7321	7567	7546	8085	19339	17096	15577	14462	14592	14542	10063	10630	18400	7426	7372	7024	7642	7579	7836	7978	8013	7322		37.1708	16086	14149	13201	9760	9151	11024	10590	9641
37.2166	51597	64244	60065	27160	24558	21766	25283	26350	24840	12434	11922	13871	10689	9088	10691	7225	7484	7482	7328	7423	7716	19969	17277	15618	14571	14449	14280	10563	10879	17406	7543	7355	7357	7715	7781	7887	7811	7926	7328		37.2166	16434	14323	13511	9925	9150	10728	10408	9756
37.2625	51931	64426	60408	26807	24011	22124	25472	25968	24641	12316	11815	13851	10491	9167	10319	7243	7344	7235	7542	7664	7585	19564	16947	15697	14504	14570	14402	10582	11067	17628	7399	7482	7481	7494	7634	7641	7813	7778	7230		37.2625	16102	14744	13699	9999	9116	10710	10561	9795
37.3083	51537	64513	60185	27205	24514	22202	25504	26000	24803	12661	12087	13969	10536	9253	10455	7317	7557	7543	7633	7291	8084	19564	17204	15649	14589	15032	14486	10407	10888	18135	7461	7657	7118	7633	7870	7816	7798	7956	7294		37.3083	16186	14339	13769	10254	8869	11068	10446	9577
37.3541	51780	63679	59810	26946	24236	22487	25528	26035	24670	12504	12046	13856	10580	9159	10607	7193	7483	7429	7521	7516	7987	19785	17035	15947	14591	14413	14422	10024	10703	18024	7344	7722	7107	7595	7585	7580	7904	7809	7449		37.3541	16291	14273	13388	9523	8723	10817	10329	9731
37.4	51248	64265	60703	26897	24558	22398	25121	25996	24625	12488	11873	13580	10690	9261	10596	7159	7549	7319	7523	7611	7789	19685	17078	15583	14728	14468	14374	9982	10655	17531	7416	7551	7280	7588	7747	7743	7818	7874	7458		37.4	16584	14441	13879	10042	9030	10734	10433	9637
37.4458	51465	64483	61213	26767	24232	22347	25177	25841	24594	12691	12090	14032	10553	9283	10465	7250	7661	7316	7488	7400	8063	19919	17082	15563	14747	14488	14245	10058	10618	18006	7484	7536	7172	7416	7907	7770	7725	7756	7319		37.4458	16173	14402	13858	9930	9019	10843	10480	9565
37.4916	51541	64340	60396	27269	24425	22379	25237	26006	24751	12509	11865	13957	10744	9189	10414	7279	7454	7523	7521	7613	7987	19510	16843	15619	14789	14562	14048	10115	10692	17615	7694	7660	7249	7575	7600	7939	7838	7819	7252		37.4916	16403	14253	13378	9877	9108	10969	10754	9655
37.5375	52199	64173	60393	26602	24406	22526	25156	26058	24632	12652	11986	13911	10897	8779	10397	7318	7432	7433	7587	7443	7997	19751	17285	15721	14573	14618	14313	10281	10768	17660	7190	7547	7417	7576	7682	7693	7787	7778	7229		37.5375	16258	14698	13623	9814	9119	10857	10655	9852
37.5833	51314	64164	61065	27083	24459	22422	25032	26065	24503	12638	12056	13920	10741	9304	10438	7434	7361	7297	7531	7285	7855	19754	16819	15618	14605	14685	14498	10239	10940	17940	7415	7468	7451	7618	7876	7702	7778	7764	7489		37.5833	16106	14458	13372	10088	8872	10881	10687	9650
37.6291	51742	64107	60392	26614	24734	22438	25132	26167	24262	12466	11891	14149	10798	9259	10584	7318	7478	7337	7537	7224	7875	19829	17205	15429	14380	14316	14104	10408	10804	17948	7376	7647	7373	7744	7880	7784	7567	7784	7099		37.6291	16413	14341	13288	9948	9022	11036	10658	9690
37.675	51036	63875	60472	26353	24305	22259	24826	26172	24676	12518	11925	14101	10917	9252	10528	7207	7460	7375	7452	7578	7923	19532	17179	15866	14592	14807	14688	10066	10917	18197	7385	7597	7298	7630	7812	7639	7621	7833	7253		37.675	16225	14412	13586	9908	8908	10884	10668	9651
37.7208	50569	64669	60379	27069	24191	22564	25284	26003	24552	12354	11959	13998	10504	9417	10574	7486	7176	7214	7531	7425	7923	19322	17477	15584	14591	14569	14285	10099	10412	17714	7380	7377	7477	7756	7744	7784	7893	7730	7391		37.7208	16181	14313	13617	10062	9078	10651	10397	9779
37.7666	51720	64197	60071	27051	24877	22197	24996	26171	24806	12537	11720	13870	10787	9322	10555	7227	7334	7382	7652	7586	7794	19828	17189	15681	14590	14837	14526	10104	10928	17937	7213	7589	7243	7427	7789	7810	7771	7751	7292		37.7666	16339	14594	13623	10030	9059	11047	10448	9763
37.8125	51404	63968	60736	27330	24566	22388	25310	25836	24531	12219	11943	13853	10711	9387	10598	7356	7365	7270	7397	7352	8056	20033	17537	15490	14357	14413	14251	10014	10762	17618	7566	7477	7270	7501	7912	7671	7910	7859	7313		37.8125	16235	14256	13660	9920	8762	10667	10465	9823
37.8583	51359	64155	59762	26719	24722	22033	25206	25757	24665	12459	11806	13669	10835	9037	10501	7061	7340	7394	7511	7489	7804	19771	17419	15530	14449	14819	14424	10259	10531	18105	7379	7603	7459	7707	7750	7865	7635	7801	7307		37.8583	16241	14288	13580	10283	9012	10950	10373	9909
37.9041	51571	63139	60342	26718	24349	22458	25026	25834	24647	12180	11765	14309	10744	9384	10503	7390	7403	7443	7623	7628	8052	19939	17430	15539	14454	14928	14413	10159	10823	18092	7391	7591	7218	7575	7797	7453	7777	7664	7313		37.9041	16239	14549	13401	10179	8863	10822	10538	9738
37.95	51391	64405	59945	27048	24511	22451	24713	25837	24478	12360	11824	13631	10533	9462	10440	7375	7448	7216	7537	7153	8032	19812	17213	15692	14637	14663	14107	10340	11139	18000	7666	7532	7381	7567	7676	7883	7716	7841	7463		37.95	16406	14585	13486	9806	9004	10540	10550	9667
37.9958	51699	64364	60252	27004	24428	22276	24775	25902	24762	12567	11976	14145	10860	9275	10471	7220	7544	7475	7554	7354	8142	19709	17408	15799	14786	14563	14463	10352	10701	17784	7344	7393	7127	7576	7779	7606	7855	7614	7410		37.9958	16385	14603	13559	9967	8882	10634	10444	9593
38.0416	51253	63984	60785	26990	24356	22233	25338	25874	24520	12345	11963	13864	10890	9280	10528	7348	7556	7428	7680	7442	7815	19774	17174	15594	14484	14619	14230	10303	10886	17692	7601	7585	7215	7855	7602	7570	7765	7849	7232		38.0416	16190	14277	13534	9760	9159	10757	10563	9712
38.0875	52294	63905	60724	26511	24346	22256	25191	26216	24550	12147	11715	13660	10861	9224	10484	7238	7380	7211	7638	7489	7926	19592	17211	15741	14494	14725	14378	10077	11097	17763	7291	7455	7295	7507	7782	7805	7571	7866	7423		38.0875	16542	14837	13687	9937	8982	10945	10582	9630
38.1333	51015	64320	59571	27271	24334	22412	25314	26083	24689	12462	11716	13793	10910	9271	10689	7423	7493	7360	7440	7531	7768	19593	17071	15748	14578	14786	14018	10241	10918	17828	7224	7412	7314	7500	7660	7593	7853	7809	7215		38.1333	16159	14276	13646	10162	9321	10994	10347	9727
38.1791	50658	64400	60003	27132	24710	22081	24690	25886	24762	12414	11770	13832	10678	9406	10593	7341	7504	7428	7474	7468	8081	19564	17013	15734	14401	14951	14519	10416	10963	17557	7289	7383	7277	7485	7834	7624	7780	7865	7235		38.1791	16291	14182	13703	10067	8921	10521	10618	9588
38.225	51144	63554	59963	26623	24341	21862	25153	26310	24789	12399	11806	14188	11090	9046	10518	7423	7388	7492	7536	7326	8015	19730	17175	15635	14542	14405	14035	10276	11136	17887	7363	7516	7397	7604	7807	7554	7714	7581	7271		38.225	16255	14300	13327	9664	8926	10892	10466	9742
38.2708	50708	63707	60326	27395	24226	22411	24908	26230	24570	12103	11955	13978	11032	9505	10273	7241	7406	7368	7559	7441	7966	19731	17017	15531	14588	14552	14242	10054	11080	18127	7238	7260	7195	7640	7899	7647	7846	7879	7336		38.2708	16137	14153	13456	9751	8836	10534	10420	9729
38.3166	50634	63826	59209	26790	24581	22220	24650	25970	24107	12323	11833	14045	10636	9344	10508	7232	7510	7091	7379	7667	8270	19229	17216	15648	14782	14578	14221	10271	11213	17792	7394	7627	7477	7584	7787	7874	7701	7618	7371		38.3166	16276	14235	13445	9869	9093	10790	10370	9724
38.3625	51219	63916	60010	27127	24597	22186	25281	25839	25015	12350	11833	13717	10953	9189	10485	7350	7445	7280	7649	7658	7871	20065	16926	15938	14731	14566	14345	10314	10765	17697	7365	7472	7371	7370	7726	7613	7798	7677	7043		38.3625	16466	14274	13446	10183	9102	10824	10601	9711
38.4083	50995	63965	60599	26801	24286	22056	25017	25336	24552	12557	12084	13926	10946	9196	10566	7376	7424	7315	7681	7602	7996	19659	17488	15699	14747	14778	14221	10418	10866	17847	7452	7704	7216	7562	7784	7721	7712	7753	7130		38.4083	16251	14287	13662	9905	9271	10794	10495	9783
38.4541	50979	63763	59905	26471	24194	22179	24947	25749	24757	12261	11755	13818	11042	9447	10551	7416	7375	7536	7481	7420	7761	19683	16948	15986	14421	14722	14289	9769	11192	17472	7353	7581	7386	7592	7540	7942	7786	7578	7218		38.4541	16238	14231	13362	10024	8878	10918	10684	9596
38.5	50851	64349	60076	27054	24477	22166	25161	25832	24288	12451	12014	14257	10821	9019	10809	7376	7503	7532	7389	7625	8019	19613	17421	15602	14529	14742	14428	10174	10880	18127	7454	7432	7283	7548	7811	7704	7832	7769	7338		38.5	16205	14430	13569	9605	9038	10826	10669	9611
38.5458	51429	63253	59990	26773	24079	22155	25094	26088	24137	12416	11550	13461	10797	9403	10899	7578	7403	7336	7639	7557	7977	19612	17077	15795	14637	14565	14131	10274	11052	17734	7402	7411	7379	7614	7522	7584	7519	7901	7217		38.5458	16488	14495	13587	9922	9018	10819	10381	9545
38.5916	51053	64815	60122	26846	24235	21901	25117	25599	24736	12430	11447	13777	11221	9398	10664	7238	7375	7086	7677	7609	8067	19614	17255	15789	14514	14690	14538	10222	10859	17878	7406	7478	7369	7552	7697	7757	7755	7700	7190		38.5916	16033	14581	13650	10008	8974	11228	10429	9589
38.6375	51522	63985	59283	26502	24685	22396	24887	26010	24656	12445	11878	13962	10988	9155	10527	7397	7245	7153	7658	7469	8015	19675	17489	15727	14582	14919	14177	10179	10861	17703	7455	7501	7566	7634	7789	7624	7627	7674	7253		38.6375	16185	14196	13347	10129	9036	10735	10578	9771
38.6833	51567	64509	60223	26935	24546	22232	25196	25965	24952	12350	11714	13802	11063	9279	10738	7250	7546	7377	7347	7461	7817	19404	17408	15617	14638	14621	14085	10189	11131	17823	7226	7342	7299	7534	7663	7699	7736	7470	7092		38.6833	16453	14571	13777	10116	8909	10816	10183	9757
38.7291	50997	63812	60180	27000	24584	22495	24940	26589	24420	12341	11845	14003	10759	9384	10476	7391	7400	7381	7709	7624	8044	19743	17349	15418	14712	14095	14457	10098	11195	17972	7449	7347	7273	7687	7604	7844	7773	7649	7346		38.7291	16300	14719	13622	10109	8932	10939	10481	9777
38.775	50366	64168	59833	26841	24265	22294	25150	25828	24456	12531	11716	13793	10740	9515	10458	7535	7526	7206	7667	7313	7921	19911	16909	15634	14375	14777	14448	10116	11043	17982	7451	7520	7164	7433	7506	7407	7673	7785	7071		38.775	16126	14452	13171	9821	9262	10421	10478	9657
38.8208	51313	64533	59599	26726	24313	22573	25064	26390	24634	12295	11562	13577	11224	9334	10752	7433	7402	7331	7494	7607	7715	19680	17286	15287	14805	14779	14451	10196	11120	17937	7500	7303	7241	7549	7715	7542	7640	7548	7132		38.8208	16426	14418	13412	10023	9075	10781	10442	9825
38.8666	50676	63875	59968	26848	24669	22233	24958	26037	24487	12374	11835	14045	11217	9263	10411	7232	7215	7288	7579	7460	7782	19549	17368	15697	14369	14465	14065	10075	11153	17202	7539	7685	7272	7601	7890	7512	7669	7762	7322		38.8666	16227	14284	13398	9816	9006	10804	10312	9499
38.9125	50939	63540	60269	26326	24580	22048	25346	25956	24621	12370	11991	13806	11074	9291	10447	7390	7357	7395	7612	7502	7670	19308	17297	15532	14613	14471	14106	10144	11505	17814	7330	7237	7420	7629	7816	7652	7711	7845	7426		38.9125	16234	14364	13809	9865	8743	10805	10250	9695
38.9583	50669	63720	60512	26737	24364	22023	24972	26345	24717	12391	11608	13751	10974	9164	10574	7331	7359	7207	7464	7301	7852	19521	17299	15920	14386	14634	14249	10431	11054	17693	7383	7226	7097	7406	7711	7597	7675	7801	7255		38.9583	16672	14552	13411	9879	8902	11014	10633	9777
39.0041	50657	64325	59951	26760	24287	22167	25187	26191	24364	12342	11821	13813	11457	9224	10429	7111	7417	7378	7362	7347	7930	19717	17499	15344	14638	14610	14377	10087	11368	17593	7587	7423	7369	7515	7974	7631	7861	7746	7259		39.0041	16362	14462	13449	9842	8922	10827	10445	9744
39.05	50595	64170	59979	26417	24470	22256	25057	26100	24455	12154	11667	13900	10966	9446	10641	7338	7303	7416	7368	7479	8130	19459	16944	15738	14384	14698	14115	9969	11397	17786	7484	7508	7222	7725	7722	7602	7786	7720	7169		39.05	16544	14433	13728	9947	8866	11150	10420	9495
39.0958	51186	63942	60051	26892	24585	21985	24607	26058	24721	12230	11660	13503	11298	9371	10634	7458	7363	7356	7629	7479	7916	19509	17367	15448	14448	14501	14094	10272	11369	17793	7540	7622	7381	7663	7673	7772	7765	7863	7228		39.0958	16342	14284	13196	9584	8760	10606	10394	9365
39.1416	51109	64035	59902	26805	24079	22013	24869	25930	24745	12675	11511	14057	11531	9358	10253	7212	7046	7267	7360	7625	8115	19329	17240	15641	14455	14467	14105	10215	11470	17936	7210	7234	7373	7626	7831	7518	7705	7560	7225		39.1416	16290	14451	13305	10166	8778	10742	10522	9628
39.1875	51613	64275	59823	26296	24269	21854	25016	25898	24210	12157	11885	13698	11523	9503	10812	7207	7250	7338	7728	7546	7828	19565	17113	15566	14240	14576	14474	10128	11374	17833	7258	7417	7127	7546	7797	7626	7688	7626	7043		39.1875	16157	14543	13460	9901	8896	11001	10512	9706
39.2333	51191	63834	59924	26595	24667	22115	25101	26079	24777	12165	11467	13821	11334	9462	10673	7277	7386	7217	7585	7523	8112	19435	17365	15543	14673	14661	14446	10381	11598	17715	7459	7199	7257	7644	7949	7558	7890	7547	7493		39.2333	16405	14001	13492	9951	8934	10982	10392	9403
39.2791	51147	64320	59806	26584	24254	21842	25190	25928	24728	12153	11742	13582	11144	9170	10700	7400	7386	7446	7583	7456	7883	19437	17194	15518	14706	14578	14098	10499	11670	17344	7217	7424	7309	7367	7660	7625	7843	7666	7228		39.2791	16337	14673	13254	9847	9017	11035	10619	9809
39.325	51144	63901	59776	26890	24429	21995	24559	26173	24654	12400	11814	13452	11339	9487	10571	7323	7310	7366	7677	7529	7952	19999	17012	15658	14471	14301	14174	10279	11231	17946	7429	7216	7287	7755	7572	7504	7560	7628	7281		39.325	16245	14609	13309	10011	8867	10944	10388	9640
39.3708	50861	64101	59611	26536	24323	22172	24990	25694	24620	12585	11905	13849	11199	9313	10429	7217	7669	7139	7426	7549	7953	19249	17175	15751	14500	14531	14388	10173	11405	17973	7603	7307	7314	7654	7555	7648	7781	7733	7163		39.3708	16167	14207	13391	9783	8926	10632	10502	10096
39.4166	50396	63755	59555	26360	24306	22128	25040	26036	24813	12423	11641	13663	11592	9436	10669	7246	7433	7428	7599	7494	7997	19209	16962	15689	14519	14868	14397	10047	11458	17729	7422	7438	7229	7541	7771	7741	7673	7555	7537		39.4166	16124	14522	13505	10025	8815	10898	10556	9585
39.4625	50507	64196	59780	26684	23995	22013	25130	25964	24544	12513	11752	13483	11286	9634	10489	7431	7412	7380	7615	7482	8044	19459	17436	15587	14577	14456	14200	10453	11532	17686	7475	7462	7262	7712	7735	7634	7755	7668	7335		39.4625	15970	14444	13695	9843	9091	10461	10662	10140
39.5083	50572	64180	60300	26397	24422	22074	24823	26090	24188	12397	11607	13779	11187	9158	10676	7393	7125	7142	7469	7503	8013	19774	17535	15346	14338	14461	14139	10483	11303	17762	7612	7471	7384	7603	7549	7618	7826	7850	7331		39.5083	16303	14212	13549	9890	8956	10537	10211	9766
39.5541	50891	63723	59643	26474	24355	22142	24700	25771	24250	12435	11760	13665	11119	9614	10552	7414	7486	7563	7519	7562	7820	19704	17196	15553	14330	14335	14290	10109	11791	17525	7658	7282	7336	7304	7755	7824	7738	7589	7431		39.5541	16068	14505	13373	9723	8716	10582	10348	9717
39.6	51259	63475	60010	26529	24243	22160	24876	25714	24553	12129	11732	13712	11245	9374	10502	7290	7213	7302	7662	7549	7916	19628	17036	15433	14423	14452	14164	10066	11568	17940	7476	7339	7319	7614	7605	7732	7900	7772	7126		39.6	16226	14138	13241	9697	9098	10757	10524	9484
39.6458	50443	64127	59614	26768	24058	21960	24642	26223	24692	12517	11865	13596	11404	9328	10538	7205	7395	7343	7584	7435	8038	19801	17104	15616	14556	14733	13967	10223	11385	17722	7424	7498	7216	7503	7719	7497	7751	7536	7300		39.6458	15947	14629	13268	9652	8877	10625	10633	9457
39.6916	51144	64106	60100	27007	24079	22442	24871	25636	24158	12379	12093	14042	11229	9356	10634	7288	7327	7219	7499	7541	7875	19546	17184	15501	14653	14504	14366	10214	11612	17556	7435	7665	7273	7730	7712	7786	7634	7859	7034		39.6916	16514	14143	13677	9932	8963	10660	10196	9718
39.7375	50496	64130	59966	26510	24281	21924	25075	25871	24378	12381	11679	13327	11318	9473	10546	7258	7521	7301	7331	7478	7839	19502	16925	15501	14412	14481	14227	10461	11817	17724	7709	7517	7242	7625	7815	7734	7692	7642	7124		39.7375	16138	14129	13163	9818	8843	10805	10457	9336
39.7833	50520	63681	59530	26605	24480	21652	24681	26041	24365	12168	11919	13523	11451	9603	10716	7242	7431	7122	7589	7663	8046	19233	17225	15717	14175	14700	13960	10320	11490	17664	7506	7607	7150	7523	7730	7757	7792	7672	7357		39.7833	16357	14238	13460	9962	9129	10911	10355	9565
39.8291	50366	63679	59620	26371	23941	22275	24826	25938	23873	12444	11763	13650	11163	9447	10513	7390	7385	7163	7551	7529	7861	19498	17047	15602	14568	14333	14371	10119	11650	17447	7394	7547	7446	7433	7771	7733	7482	7760	7161		39.8291	16421	14175	13531	9837	8917	10607	10453	9726
39.875	50774	63272	60181	26403	24418	21932	25026	25630	24372	12069	11908	13795	11291	9410	10698	7328	7615	7460	7450	7481	8042	19536	17035	15774	14455	14788	14414	10330	11764	17590	7337	7496	7277	7655	7683	7401	7937	7696	7369		39.875	16458	14732	13531	9794	8993	10961	10465	9487
39.9208	50564	62937	59473	26653	24068	22057	24958	25619	24268	12443	11777	13805	11564	9327	10460	7231	7586	7302	7446	7546	7944	19394	16921	15449	14483	14482	14337	10353	11937	17524	7371	7312	7207	7511	7605	7822	7631	7899	7401		39.9208	16013	14578	13529	9853	8951	10592	10431	9682
39.9666	50421	63420	59616	26309	24331	21767	24698	25879	23903	12395	11714	13374	11534	9373	10499	7404	7314	7532	7459	7263	7955	19621	16965	15772	14478	14435	14316	10397	11862	17796	7371	7299	7328	7561	7869	7816	7695	7727	7371		39.9666	16541	14296	13247	9941	8807	10588	10248	9589
40.0125	50803	63552	59645	26654	24076	22244	24750	25898	24402	12250	11583	13363	11507	9510	10406	7332	7296	7177	7492	7382	7713	19301	17250	15276	14561	14370	14139	10226	11518	18080	7263	7355	7350	7707	7844	7673	7702	7825	7270		40.0125	16344	14495	13589	9955	8912	10693	10556	9536
40.0583	50462	64153	59687	26759	24366	21965	24921	25628	24393	12096	11884	13739	11251	9438	10604	7211	7215	7262	7504	7431	7979	19493	16931	15749	14785	14592	14345	10218	12032	17486	7361	7732	7409	7747	7633	7558	7823	7524	7230		40.0583	16292	14166	13541	9748	8910	10846	10355	9577
40.1041	50578	63855	59679	26229	24144	22001	24615	25984	24609	12402	11501	13928	11135	9346	10548	7287	7308	7605	7402	7417	8023	19581	16966	15770	14305	14170	14315	10456	11739	17793	7490	7597	7133	7591	7741	7663	7662	7599	7287		40.1041	16277	14247	13468	9824	8809	10698	10419	9625
40.15	50503	63702	59586	26486	24207	21991	24446	26267	24397	12413	11680	13699	11293	9328	10595	7095	7324	7346	7425	7548	8031	19463	16977	15433	14676	14567	14041	10323	11700	17652	7621	7576	7116	7439	7635	7816	7999	7760	7330		40.15	16192	14340	13155	9633	8804	10824	10341	9474
40.1958	50216	64183	59563	26319	24736	21785	24762	25825	24313	12068	11692	13427	11364	9386	10557	7258	7633	7351	7690	7465	8082	19612	17210	15515	14606	14691	14039	10543	11811	17784	7449	7397	7382	7615	7825	7510	7746	7712	7455		40.1958	15927	14317	13580	9726	8743	10726	10413	9752
40.2416	51287	63637	59541	26485	24051	21658	25229	25386	24054	12446	11663	13544	11460	9267	10533	7296	7451	7216	7594	7332	7763	19305	17266	15404	14440	14077	14228	10192	11928	17768	7542	7675	7315	7449	7516	7659	7876	7627	7292		40.2416	16313	14331	13514	10040	8950	10679	10418	9523
40.2875	50278	63893	58837	26919	24426	22141	24963	25782	24425	12315	11478	13380	11551	9359	10580	7384	7351	7387	7450	7493	7842	19466	16916	15350	14944	14410	14067	10140	11740	17707	7431	7690	7204	7704	7685	7718	7727	7750	7246		40.2875	16002	14582	13748	9827	8914	10700	10274	9599
40.3333	50760	63689	59333	26533	24433	21851	24602	25858	24228	12258	11765	13289	11350	9339	10444	7545	7182	7427	7359	7505	8062	19601	17071	15719	14769	14952	14025	10305	11769	17608	7427	7370	7287	7425	7742	7730	7742	7942	7240		40.3333	16216	14430	13511	9944	8878	10773	10378	9547
40.3791	49904	63122	59943	25667	24111	22013	25240	25981	24142	12235	11635	13590	11491	9695	10377	7135	7551	7200	7372	7396	7733	19988	17195	15630	14478	14503	14322	10152	12113	18017	7386	7633	7219	7584	7835	7334	7640	7877	7153		40.3791	16192	13971	13577	9746	8876	11087	10460	9662
40.425	50723	64210	60060	26572	24066	22260	24787	25512	24488	12131	11651	13610	11329	9424	10544	6992	7452	7186	7431	7593	7918	19714	17084	15546	14757	14364	13943	10410	12177	17589	7596	7392	7391	7535	7656	7598	7701	7523	7389		40.425	16275	14565	13394	9796	8974	10647	10256	9496
40.4708	50296	63927	59540	26263	24068	22228	25089	25632	23984	12488	11841	13636	11258	9257	10691	7235	7094	7197	7437	7478	7769	19456	17074	15555	14574	14545	14379	10217	12217	17778	7651	7599	7288	7605	7470	7701	7449	7596	7342		40.4708	16181	14183	13507	9745	8744	10696	10398	9722
40.5166	50960	62633	59799	26370	24212	22010	24562	25737	24437	12429	11519	13692	11532	9470	10399	7391	7234	7236	7397	7465	7850	19479	17355	15445	14555	14644	14262	10182	12186	17755	7317	7367	7195	7535	7642	7562	7651	7482	7193		40.5166	15960	14233	13655	9869	9043	10441	10297	9651
40.5625	50724	63266	60158	26160	24311	21801	24694	25454	24199	12541	11754	13875	11565	9622	10318	7518	7222	7254	7398	7546	7810	19344	17126	15520	14424	14607	14198	10462	12124	17818	7453	7626	7144	7537	7429	7635	7403	7684	7095		40.5625	15833	14361	13394	9771	8916	10555	10295	9457
40.6083	50906	63870	60026	26540	24198	22098	24713	25729	24154	12376	11665	13592	11321	9367	10613	7441	7389	7491	7555	7606	7896	19457	17157	15574	14466	14366	13980	10430	12205	17928	7565	7522	7291	7611	7725	7505	7612	7534	7181		40.6083	15986	14230	13450	9890	9066	10559	10434	9751
40.6541	49839	63204	59606	26465	24172	22165	25108	25876	24547	12490	11840	13578	11307	9496	10538	7460	7276	7313	7491	7472	7815	19231	16793	15424	14646	14397	14241	10165	12423	17726	7395	7672	7147	7692	7790	7766	7839	7714	7110		40.6541	16264	13964	13134	9571	8848	10666	10301	9452
40.7	50259	63847	58987	26440	23788	22269	24730	25581	24736	12257	11896	13539	11399	9478	10701	7160	7357	7156	7619	7504	7857	19642	17070	15302	14774	14532	13918	10297	12438	17814	7658	7624	7166	7574	7757	7659	7882	7751	7250		40.7	16349	14092	13465	9753	9047	10489	10615	9763
40.7458	50467	63433	59315	26264	24490	21638	24167	25872	24354	12524	11605	13562	11504	9396	10748	7300	7348	7224	7490	7286	7901	19794	17036	15548	14587	14663	14308	10136	12316	17970	7687	7601	7338	7551	7730	7632	7778	7629	7457		40.7458	15877	14313	13381	9742	8961	10524	10314	9522
40.7916	50256	63406	59669	26034	23939	21667	24702	25909	24310	12107	11567	13232	11364	9487	10476	7250	7452	7369	7323	7498	7679	19475	17001	15426	14652	14503	14140	10338	12397	17733	7606	7504	7322	7617	7673	7609	7723	7529	7336		40.7916	16062	14216	13301	9716	8985	10649	10157	9576
40.8375	50019	63941	59543	26331	24192	21952	25022	26056	24509	12093	11685	13891	11600	9572	10570	7361	7208	7454	7564	7524	7866	19074	16996	15402	14728	14456	14407	10430	12291	17791	7487	7781	7392	7645	7740	7458	7976	7415	7365		40.8375	16239	14277	13457	9762	8945	10443	10139	9671
40.8833	50741	64183	59227	26592	24393	21882	24673	25348	24309	12443	11494	13335	11593	9502	10560	7319	7185	7334	7491	7478	7962	19513	17389	15222	14697	14444	14671	10592	12552	17654	7412	7567	7130	7510	7800	7581	7766	7608	7113		40.8833	15932	14155	13414	9946	8662	10922	10360	9755
40.9291	50630	63928	59295	26481	24019	21804	24741	25862	24132	11847	11612	13570	11423	9446	10743	7288	7219	7198	7395	7519	7713	19224	17342	15481	14506	14400	14369	10267	12403	17560	7493	7712	7339	7460	7704	7423	7851	7776	7485		40.9291	16377	14834	13248	9828	9104	10434	10475	9701
40.975	50245	62928	58948	25991	24277	21834	24527	25765	24366	12133	11621	13655	11596	9267	10687	7434	7395	7296	7503	7519	7820	19588	17445	15496	14649	14571	14434	9966	12614	17937	7324	7685	7366	7520	7615	7639	7626	7510	7309		40.975	16036	13988	13389	9786	8722	10342	10149	9440
41.0208	49915	63706	58844	26360	24523	22210	24763	25813	24217	12152	11623	13244	11399	9481	10497	7219	7124	7382	7584	7491	7885	19474	16788	15850	14411	14585	14215	10157	12613	17399	7616	7567	7396	7622	7715	7763	7498	7760	7215		41.0208	16298	13801	13336	9696	8926	10590	10319	9498
41.0666	50332	62997	59026	26351	24356	21755	24501	25787	24431	12350	11648	13640	11592	9198	10554	7447	7399	7137	7552	7685	7891	19249	17419	15372	14487	14406	14440	10344	12554	17575	7440	7681	7164	7332	7505	7728	7694	7824	7172		41.0666	16143	14284	13549	9672	8832	10639	10343	9495
41.1125	50650	62972	59681	26354	23848	21632	24923	26000	24128	12720	11385	13450	11356	9351	10632	7374	7480	7373	7432	7540	7800	19257	16704	15534	14401	14534	13782	10280	12650	17682	7580	7730	7321	7640	7574	7686	7738	7755	7323		41.1125	16141	14433	13475	9767	8999	10811	10271	9756
41.1583	50251	63067	59619	26645	24072	21599	24943	25636	24341	12075	11592	13472	11553	9358	10595	7265	7181	7227	7535	7179	7898	19242	16993	15346	14493	14453	14419	10247	12727	17664	7387	7854	7279	7479	7834	7483	7748	7725	7281		41.1583	15799	13998	12972	9572	8688	10453	10051	9454
41.2041	50199	63574	59016	26573	24119	21862	25031	25441	24460	12440	11799	13506	11789	9153	10579	7270	7325	7460	7402	7327	7889	19189	17060	15391	14450	14420	14301	10098	12565	17602	7437	7995	7319	7492	7442	7722	7693	7617	7019		41.2041	16073	14185	13595	9814	9092	10672	10407	9698
41.25	50022	63745	59056	26432	24200	22077	24829	25425	24038	12229	11806	13487	11850	9180	10286	7420	7367	7383	7763	7512	7870	19677	17002	15124	14672	14476	14178	10278	12727	17522	7506	7704	7283	7431	7816	7487	7680	7832	7233		41.25	16376	14199	13637	9890	8897	10680	10473	9612
41.2958	49925	63759	59520	26438	23854	22225	24676	25298	24305	12303	11655	13464	11608	9412	10648	7310	7263	7360	7546	7212	7690	19240	17478	15387	14578	14304	14176	10365	13060	17941	7485	7949	7093	7327	7603	7573	7310	7594	7132		41.2958	16239	14267	13291	9704	9103	11067	10507	9509
41.3416	51148	64380	59194	26236	24106	21853	24814	26068	24529	12268	11526	13559	11595	9615	10456	7409	7201	7475	7383	7427	7711	19510	17044	15248	14570	14331	14183	10035	13033	17623	7452	7746	7257	7455	7648	7557	7778	7793	7190		41.3416	15882	14316	13483	9753	8767	10680	10294	9458
41.3875	50193	63037	59490	26420	23892	21448	24719	25295	24300	12330	11642	13607	11665	9510	10521	7358	7409	7136	7328	7427	7683	19277	16990	15687	14414	14351	14380	10210	12932	18012	7502	7969	6988	7424	7773	7556	7554	7424	7139		41.3875	16252	14154	13343	9715	8904	10499	10344	9563
41.4333	50084	62740	59310	26243	24100	22136	25073	25886	24122	12187	11485	13641	11570	9585	10542	7125	7302	7190	7458	7357	7706	19173	17239	15400	14395	14331	14229	10394	13129	17600	7571	7725	7169	7559	7545	7765	7751	7719	7125		41.4333	16028	14177	13255	9671	8926	10909	10161	9531
41.4791	49659	63347	59243	26355	23731	21618	24180	25771	24650	12090	11609	13449	11564	9400	10532	7261	7527	7415	7388	7423	7820	19194	17189	15359	14115	14349	14455	10383	13287	17786	7530	7606	7215	7628	7602	7402	7710	7431	7154		41.4791	16047	14157	13270	10085	8901	10565	10424	9627
41.525	49434	63101	59579	26381	23875	21734	24808	26117	24121	12220	11688	13561	11634	9299	10568	7388	7581	7259	7544	7332	7742	19558	16948	15187	14532	14613	14416	10346	13242	17680	7512	7784	7219	7627	7456	7766	7716	7676	7372		41.525	16281	14237	13298	9577	8811	10612	10350	9510
41.5708	49949	62867	59392	26258	24632	22010	24557	25910	24236	12383	11595	13489	11745	9669	10664	7448	7498	7390	7557	7395	7811	19205	17165	15307	14315	14527	14268	10294	13186	17954	7609	8006	7369	7556	7531	7500	7663	7813	7285		41.5708	16150	14133	13323	10014	8954	10567	10314	9761
41.6166	50209	63747	58804	26044	24144	22033	24778	25734	24046	12397	11656	13640	11681	9434	10753	7579	7496	7272	7490	7477	7803	19397	17260	15633	14575	14470	14119	10619	13304	17889	7519	7955	7109	7485	7661	7472	7806	7556	6919		41.6166	16213	14280	13488	9788	8882	10819	10354	9630
41.6625	50336	63476	58748	26270	23870	21992	24465	25578	24169	12329	11682	13272	11326	9359	10424	7496	7374	7203	7409	7402	7772	19685	17008	15709	14766	14387	14207	10069	13241	17709	7752	7947	7190	7694	7602	7685	7700	7801	7050		41.6625	15983	14238	13030	9703	8955	10405	10155	9481
41.7083	50074	63988	58956	25995	23747	21890	24917	25632	24401	12310	11776	13466	11645	9402	10542	7385	7329	7209	7455	7531	7872	19502	17077	15357	14345	14332	14266	10473	13495	17875	7550	8055	7100	7599	7458	7442	7713	7743	7013		41.7083	15917	14379	13217	9691	9028	10586	10339	9594
41.7541	49979	63050	59882	26324	23600	21612	24641	25428	24248	12182	11518	13384	11394	9553	10716	7188	7376	7123	7387	7462	7767	19481	17093	15256	14414	14067	14124	10256	13321	17733	7563	8036	7184	7379	7493	7573	7689	7533	7478		41.7541	16109	14370	13553	9898	8610	10488	10294	9569
41.8	50089	63478	59346	26177	24122	21933	24924	25956	24158	12379	11872	13478	11693	9476	10486	7140	7422	7289	7651	7389	7815	19157	17154	15536	14566	14327	14235	10665	13582	17630	7581	8030	7310	7375	7703	7423	7592	7733	7284		41.8	16220	14214	13280	9735	8808	10801	10274	9468
41.8458	49638	63850	59585	26508	24201	21812	24826	25866	24286	12429	11542	13346	11767	9172	10825	7282	7064	7338	7423	7198	7816	19725	17069	15416	14370	14134	13636	10213	13272	17970	7567	8082	7123	7725	7434	7685	7732	7877	7128		41.8458	16208	14338	13092	9659	8919	10732	10203	9399
41.8916	50440	63312	59235	26084	24252	21660	24666	25999	24290	12159	11605	13362	11946	9596	10643	7349	7307	7202	7357	7579	7989	19511	16803	15440	14489	14587	14163	10320	13517	17525	7684	8162	7128	7611	7780	7716	7682	7666	7343		41.8916	16322	14326	13277	10183	8937	10476	10139	9583
41.9375	50226	63954	59048	25807	24261	21765	24709	25297	24424	12244	11624	13066	11721	9357	10528	7253	7263	7264	7547	7272	7812	19481	16621	15108	14624	14250	14264	10451	13323	17264	7541	8130	7230	7420	7589	7466	7691	7676	7402		41.9375	15995	14329	13164	9762	9147	10450	10428	9439
41.9833	50134	62889	59040	26161	24234	22061	24699	25813	24427	12134	11461	13519	11737	9352	10499	7241	7301	7163	7361	7392	7751	19268	17436	15457	14787	14664	14263	10000	13526	17802	7574	8127	7178	7612	7700	7618	7771	7830	7278		41.9833	15937	14137	13493	9939	8819	10688	10352	9303
42.0291	50304	63396	58895	26479	23923	21762	24731	25629	24489	12406	11631	13364	11484	9365	10503	7370	7314	7322	7513	7375	7746	19418	16902	15551	14425	14337	14281	10446	13816	17663	7575	8094	7348	7476	7679	7664	7644	7825	7107		42.0291	16188	14440	13539	9530	8869	10593	10164	9608
42.075	50328	63409	59043	26113	24361	21620	24404	25360	24383	12280	11761	13933	11780	9447	10364	7165	7396	7193	7466	7447	7805	19172	17087	15432	14339	14333	14202	10533	14015	17416	7518	8104	7228	7543	7596	7386	7856	7857	7247		42.075	16214	14129	13484	9813	8873	10613	10322	9541
42.1208	49912	63909	57958	26050	23987	22445	24521	25728	24209	12138	11594	13445	11764	9509	10654	7390	7396	7193	7399	7318	7814	19625	16742	15375	14556	14418	14210	10433	14048	17558	7527	8093	7185	7445	7640	7500	7768	7628	7295		42.1208	15947	14157	13260	10070	8873	10579	10209	9600
42.1666	50089	62608	59003	26185	24177	21727	24448	25318	24395	12225	11475	13387	11608	9321	10613	7391	7463	7148	7468	7364	7855	19236	17032	15480	14323	14187	13897	10651	13991	18280	7332	8095	7242	7580	7435	7680	7824	7670	7228		42.1666	16127	14292	13246	9674	9051	10547	10375	9473
42.2125	49570	63486	58796	26560	24649	21944	24586	25700	23981	12234	11599	13558	11704	9377	10750	7100	7601	7202	7554	7308	7866	19303	16799	15585	14609	14722	14207	10418	13666	17737	7498	8336	7151	7495	7462	7493	7689	7669	7261		42.2125	16038	14300	13172	9857	8960	10390	10256	9296
42.2583	49837	63326	58643	25929	23548	21782	24611	25921	24170	12490	11664	13520	11643	9471	10470	7327	7281	7264	7419	7323	7877	19376	17021	15177	14601	14493	14001	10679	13955	17712	7524	8344	7184	7575	7712	7339	7689	7570	7249		42.2583	16124	14193	13201	9687	8740	10259	10357	9629
42.3041	50284	63035	58961	26369	23687	22053	24378	25664	23985	12090	11933	13610	11670	9540	10508	7451	7605	7179	7438	7312	7717	19431	17044	15159	14411	14535	14097	10661	14334	17590	7353	8320	7425	7662	7604	7575	7809	7789	7237		42.3041	16115	14016	13249	9820	8959	10661	10189	9345
42.35	49902	63821	59337	26241	23761	21587	24698	25617	24423	12137	11788	13422	11617	9318	10524	7353	7246	7314	7553	7531	7847	19209	16802	15318	14417	14609	14082	10641	13996	17343	7738	8187	7339	7630	7546	7455	7990	7832	7324		42.35	15882	14105	13080	9678	8938	10564	10184	9486
42.3958	49888	63480	59261	26322	23951	21817	24235	25107	24053	12313	11521	13546	11776	9660	10209	7492	7516	7067	7481	7445	7731	19451	16995	15109	14470	14499	14124	10520	14487	17613	7784	8324	7158	7474	7688	7683	7794	7665	7061		42.3958	16055	14082	13270	9794	8660	10463	10129	9414
42.4416	50392	62832	59053	26565	24069	21859	24597	25737	24257	12445	11421	13348	11612	9438	10566	7519	7357	7213	7571	7502	7956	19186	17072	15224	14445	14433	14392	10411	14403	17642	7442	8251	7235	7437	7383	7518	7591	7459	7171		42.4416	16105	13955	13069	9583	8746	10462	10099	9526
42.4875	49477	62726	58764	26373	24236	21664	24518	25938	24208	12375	11891	13746	11643	9382	10699	7451	7577	7226	7488	7241	8037	19076	16878	15272	14502	14171	14083	10450	14181	17350	7536	8228	7171	7614	7523	7518	7563	7723	7182		42.4875	15844	14298	13391	9684	8847	9991	10407	9459
42.5333	50144	62456	59095	26363	24053	21531	24641	25590	23702	12020	11639	13396	11771	9430	10646	7294	7413	7349	7605	7673	7809	19245	17101	15299	14438	14191	14230	10525	14318	17640	7550	8382	7268	7634	7536	7651	7711	7791	7395		42.5333	15977	13962	13394	10007	8590	10407	10271	9522
42.5791	50187	62732	58429	26327	24151	22005	24196	25546	24329	12226	11688	13488	11761	9432	10556	7532	7263	7244	7366	7455	7785	19430	17006	15321	14548	14416	14086	10643	14092	17490	7875	8328	7298	7733	7709	7964	7576	7822	7201		42.5791	15862	13963	13193	9844	8907	10442	10512	9537
42.625	49895	62961	58816	26456	24072	21924	24572	25571	24234	12118	11441	13395	11728	9361	10350	7387	7432	7244	7522	7434	7826	19137	16872	15234	14952	14130	14032	10387	14166	17727	7636	8208	7194	7573	7601	7498	7684	7230	7237		42.625	16084	14131	13035	9613	9063	10241	10201	9398
42.6708	50265	63313	58986	26364	24006	21860	24774	25559	24008	12347	11350	13417	11747	9388	10352	7355	7287	7264	7274	7310	7670	19200	16785	15203	14693	14400	13903	11056	14587	17545	7415	8339	7308	7369	7526	7726	7682	7619	7080		42.6708	15757	14119	13324	9867	8640	10665	10192	9450
42.7166	49651	62971	59344	26390	24249	21649	24799	25358	24442	12192	11738	13282	11560	9074	10081	7373	7463	7337	7661	7421	7698	19442	17002	15541	14571	14315	14091	10554	14539	17892	7670	8314	7242	7430	7513	7581	7548	7452	7127		42.7166	16111	14142	13301	9561	8859	10381	10170	9498
42.7625	50346	62970	58988	26287	23392	21784	24358	25259	23997	11951	11784	13375	11705	9301	10403	7241	7471	7268	7517	7412	7660	19528	16695	15686	14437	14169	13989	10391	14633	17509	7756	8448	7172	7321	7526	7653	7649	7679	7465		42.7625	16037	13898	13189	9748	9017	10557	10437	9586
42.8083	49765	63191	59432	25875	24116	21923	24392	25677	23755	12289	11426	13442	11698	9168	10404	7254	7397	7251	7163	7231	7649	18890	16867	15330	14590	14287	14260	10832	14782	17785	7687	8264	7248	7740	7692	7403	7736	7799	7279		42.8083	15861	14117	13527	9821	9043	10378	10098	9435
42.8541	49725	63324	59169	26125	23840	21713	24408	25693	24313	12077	11439	13259	11807	9368	10410	7270	7204	7182	7482	7295	7653	19410	17203	15317	14608	14570	14230	10696	15033	17523	7742	8251	6978	7477	7756	7683	7481	7794	7459		42.8541	16190	14030	13241	9737	8752	10763	10357	9461
42.9	49759	63330	59426	25863	23728	21601	24446	25369	24023	12320	11720	13683	11783	9205	10495	7441	7554	7457	7470	7538	7976	19460	17016	15211	14389	14358	14306	10627	14917	18021	7746	8597	7207	7435	7692	7565	7838	7738	6925		42.9	16067	14221	13327	9568	8658	10490	10361	9433
42.9458	50442	62696	59063	26272	24097	21556	24512	25553	24233	12249	11574	13115	12039	9216	10533	7538	7200	7233	7509	7473	7759	19236	17167	15382	14506	14101	13888	10969	14988	17662	7347	8196	7029	7584	7580	7476	7810	7803	7303		42.9458	15908	14228	13350	9559	8821	10941	10159	9512
42.9916	50148	62349	58704	26357	23755	21557	24258	25246	24061	12359	11431	13633	11841	9365	10666	7261	7359	7145	7482	7477	7640	19316	16842	15358	14240	14150	14109	10351	14714	17648	7636	8841	7230	7344	7591	7566	7821	7706	7109		42.9916	16117	14119	13366	9860	8739	10488	10412	9338
43.0375	49170	63276	59042	26164	23767	21626	24284	25441	23850	12134	11493	13491	11784	9506	10689	7302	7427	7189	7407	7457	7712	19363	16838	15075	14388	14161	13851	10856	15081	17692	7571	8484	7171	7426	7321	7514	7628	7736	7204		43.0375	15862	14120	13221	9711	8811	10230	10276	9465
43.0833	49472	63469	58682	26193	24041	21595	24451	25469	24211	12331	11554	13403	11855	9448	10454	7242	7532	7337	7571	7367	7798	19539	17271	15352	14261	14544	14272	10876	14607	17869	7680	8667	6960	7408	7476	7410	7648	7541	7402		43.0833	16114	14303	13458	9755	8968	10640	10211	9276
43.1291	49981	63362	59160	26242	23786	21452	24532	25362	24489	12085	11707	13262	11891	9583	10504	7226	7652	7337	7500	7401	7617	19314	16999	15435	14423	14272	14324	10913	15020	17787	7651	8530	7247	7282	7585	7656	7635	7342	7195		43.1291	16227	14204	13016	9437	8885	10477	10228	9422
43.175	49479	62636	59061	25942	24408	21437	24351	25552	24193	12257	11487	13309	11752	9370	10289	7411	7208	7387	7493	7331	7842	19255	16949	15309	14734	14236	14071	10902	15023	17869	7646	8595	7290	7367	7683	7431	7746	7658	7418		43.175	15942	14029	13345	9500	8645	10381	10093	9591
43.2208	49871	62911	58579	26343	24104	21860	24242	25538	23904	12209	11512	13311	11763	9177	10428	7133	7487	7314	7500	7361	7832	19211	16989	15365	14500	14385	14108	10901	15129	17520	7749	8565	7061	7593	7445	7578	7625	7712	7154		43.2208	15691	14113	13205	9752	8867	10633	10057	9496
43.2666	49832	63028	58551	26103	24109	22121	24487	25502	24096	12242	11356	13070	11904	9374	10219	7291	7443	7535	7389	7274	7658	19370	16636	15549	14515	14426	14263	10849	15588	17670	7750	8317	7290	7077	7751	7541	7626	7459	7153		43.2666	15852	14291	13274	9819	8828	10369	10273	9170
43.3125	50198	62989	59190	26004	24098	21238	24582	25280	24074	12228	11490	13327	11947	9393	10505	7417	7575	7338	7510	7487	7712	19265	16915	15129	14352	14513	13989	10904	15395	17630	7376	8481	7150	7461	7472	7638	7798	7682	7329		43.3125	15989	13986	13330	9751	8877	10529	10155	9644
43.3583	49843	63020	58234	25978	23870	21369	24348	25298	23855	12203	11389	13123	11761	9576	10579	7077	7501	7403	7617	7179	7917	19327	16916	15635	14536	14287	14164	11144	15417	17436	7647	8568	7038	7467	7375	7530	7665	7418	7144		43.3583	16062	14151	13389	9476	8966	10214	10275	9304
43.4041	49681	62309	58333	26028	23965	21874	24367	25692	24401	12664	11486	13037	11523	9229	10799	7135	7416	7298	7562	7387	7690	19376	16638	15477	14135	14162	14146	11252	15349	17548	7394	8623	7132	7525	7473	7505	7780	7632	7277		43.4041	15943	14315	13074	9991	8779	10382	10124	9410
43.45	50035	62429	58726	25861	23688	21783	24523	25449	23953	12219	11506	13457	11973	9505	10391	7195	7503	7243	7356	7315	7930	19356	16505	15323	14154	14385	13903	10664	15417	17672	7887	8694	7153	7413	7513	7320	7726	7554	7321		43.45	16158	14432	13711	9807	8858	10669	10244	9449
43.4958	49535	62466	58562	26115	23715	21600	24219	25063	23928	12183	11600	13358	11710	9437	10331	7144	7220	7274	7350	7278	7800	19379	16974	15049	14257	14234	14036	11149	15684	17738	7860	8974	7208	7626	7709	7502	7698	7507	7178		43.4958	16272	14425	13152	9744	8761	10442	10344	9364
43.5416	50054	62788	58732	25904	23721	21913	24194	25432	24303	12129	11722	13293	11899	9584	10513	7465	7579	7276	7407	7269	7998	19487	17115	15325	14394	14611	14260	11339	15393	17413	7523	8874	7315	7422	7656	7445	7860	7629	7051		43.5416	16040	14123	13636	9646	8760	10533	10182	9465
43.5875	49584	62705	59542	26584	23623	21699	23732	25589	23936	12285	11573	13122	11992	9293	10543	7328	7243	7226	7363	7276	8051	19234	16947	15161	14260	14586	14111	11288	15590	17453	7679	8653	7241	7431	7632	7591	7670	7396	7415		43.5875	16365	14113	13381	9832	8808	10598	10186	9325
43.6333	49782	62540	58501	25902	23736	21530	24231	25462	23971	12110	11596	13505	11767	9425	10408	7356	7164	7160	7561	7433	7899	19078	16656	15328	14346	14430	14268	11137	15641	17379	7589	8705	7097	7516	7558	7504	7678	7559	7452		43.6333	16063	13998	13095	9857	8695	10569	10219	9579
43.6791	49669	62810	58923	26070	24002	21613	24519	25375	23941	12241	11397	13190	11953	9210	10577	7385	7497	7236	7362	7295	7774	18978	17093	15238	14101	14356	13922	11532	15621	17781	7655	8695	7154	7597	7627	7503	7799	7610	7191		43.6791	15947	14193	13253	9644	9012	10389	10204	9706
43.725	49427	62869	58012	25978	23635	21614	24154	25579	24265	12056	11693	13453	11841	9349	10416	7216	7305	7328	7359	7599	7911	19283	16742	15378	14359	14165	14008	11599	16017	17573	7617	8569	7257	7768	7610	7664	7630	7672	7186		43.725	15843	13983	13327	9470	8795	10588	9968	9470
43.7708	49811	63178	58602	26081	23545	21933	24257	25809	24128	12328	11742	13183	12016	9235	10511	7376	7352	7174	7435	7185	7856	19008	16897	15123	14552	14426	14114	11418	15913	17776	7781	8750	7310	7343	7753	7480	7683	7561	7037		43.7708	15993	14069	13374	9469	8902	10529	10307	9459
43.8166	49254	62213	58365	25824	23792	21876	24377	25527	23664	11920	11627	13108	11877	9311	10449	7464	7275	7316	7574	7362	7671	19318	16858	15308	14420	14147	13985	11275	15896	17839	7668	8619	7379	7317	7402	7454	7686	7637	6976		43.8166	15996	14347	13283	9696	8779	10503	10238	9472
43.8625	49206	61891	58787	25816	23919	21827	24462	26058	24085	12222	11507	13086	11902	9389	10472	7415	7137	7302	7343	7484	7698	18897	17046	15625	14537	14098	13937	11517	15891	17820	7709	8737	7383	7365	7363	7494	7610	7563	7144		43.8625	15708	14365	13112	9812	8594	10747	10429	9300
43.9083	49688	62759	58435	25855	23781	21440	24258	25552	24606	12083	11958	13455	11968	9419	10437	7354	7507	7128	7367	7320	7870	19546	16375	15248	14006	14107	14179	11646	15940	17641	7772	8639	6922	7391	7833	7506	7630	7625	7309		43.9083	15977	13957	12862	9290	8765	10590	10105	9299
43.9541	49759	62565	58689	26130	24027	21760	24163	25335	24415	12221	11561	13415	11727	9216	10448	7290	7278	7332	7572	7383	7952	19384	16924	15081	14258	14494	14198	11671	16100	17392	7708	8753	7264	7463	7648	7523	7694	7820	7349		43.9541	15772	14204	12657	9595	8786	10381	10001	9321
44	49931	62694	57726	26115	24065	22074	24569	25522	23845	12309	11638	13134	11829	9375	10423	7434	7250	7188	7471	7299	7724	19226	16948	15382	14467	14269	14243	11836	16297	17600	7600	8817	7368	7405	7408	7402	7928	7570	7142		44	15953	14410	13328	9880	8976	10339	10059	9391
44.0458	50216	62598	58604	26435	23974	21710	24347	25493	23852	12174	11626	13315	11861	9333	10871	7512	7316	7093	7473	7486	7943	18878	16939	15249	14399	14130	14088	11944	16227	17453	7595	8793	7336	7398	7428	7500	7576	7669	7285		44.0458	16093	13999	13516	9677	8625	10668	10179	9477
44.0916	49624	62818	58674	25789	23951	21469	24249	25026	23834	12071	11616	13495	11821	9523	10509	7313	7420	7292	7229	7256	7821	18957	16878	15251	14411	14136	13892	11875	16425	17834	7593	8810	7245	7540	7387	7420	7661	7828	7117		44.0916	15863	14197	13335	9882	8647	10166	10137	9337
44.1375	49842	62307	58963	26057	23746	21509	24047	25765	23978	12147	11511	13082	12199	9430	10432	7314	7352	7502	7553	7257	7742	19074	16840	15352	14223	14105	14024	11959	16426	17538	7521	8735	7496	7537	7706	7621	7600	7613	7107		44.1375	15901	14323	13301	9817	8829	10381	10254	9404
44.1833	49930	62016	58807	26038	23825	21920	24372	25523	23981	12095	11658	13031	12304	9225	10429	7466	7252	7297	7277	7269	7921	19133	17161	15415	14328	14065	14112	12072	16564	17831	7874	8906	7120	7487	7561	7502	7633	7709	7186		44.1833	16263	14122	13184	9866	8805	10546	10266	9509
44.2291	49302	62188	58119	25946	23787	21613	24155	25064	24230	11967	11527	13111	11869	9450	10615	7502	7197	7496	7506	7373	7867	19211	16673	15192	14407	14194	14020	11847	16430	17416	7685	8997	7412	7577	7597	7429	7640	7746	7052		44.2291	15918	13948	13234	9757	8684	10332	10298	9426
44.275	49828	63050	59062	25892	23710	21336	24314	25257	23794	12083	11556	13186	12123	9480	10578	7539	7272	7259	7467	7477	7571	19350	16881	15270	14613	14254	14391	12150	16494	17616	7653	8954	7338	7461	7553	7513	7537	7757	7594		44.275	15876	14329	12982	9520	8805	10593	10113	9325
44.3208	49669	63049	58218	25965	24050	21703	23834	25058	23931	11865	11447	13215	11886	9656	10454	7462	7423	7399	7436	7434	7418	19255	17227	15251	14145	14453	14217	12179	16566	17481	7842	8905	7492	7491	7543	7470	7743	7701	7169		44.3208	15936	14047	13326	9657	9020	10572	10232	9194
44.3666	50326	62216	58241	26019	23285	21617	24342	25391	23890	12120	11427	13037	12037	9301	10306	7479	7443	7441	7591	7437	7647	18990	16836	15259	14513	13991	14289	12326	16349	17755	7678	8803	7266	7337	7641	7414	7562	7632	7203		44.3666	16072	14222	13305	9833	8897	10282	10205	9391
44.4125	49616	62640	58534	26244	23559	22044	23879	25602	23897	11957	11487	13261	11701	9340	10481	7489	7402	7224	7217	7479	8013	19092	16625	15421	14244	14317	14275	12291	16459	17729	7814	8784	7147	7386	7547	7341	7747	7663	7305		44.4125	16103	13917	13220	9746	8805	10214	10152	9380
44.4583	50227	63114	58051	25829	24067	21683	24497	25317	23685	11969	11685	13297	12260	9580	10326	7634	7394	7418	7386	7593	7780	19174	17152	15210	14401	14192	14347	12537	16727	17594	7900	9103	7279	7442	7348	7456	7704	7481	7263		44.4583	15993	14104	13238	9470	8706	10547	10343	9328
44.5041	50008	62227	58584	25933	23721	21880	24736	25269	23581	11917	11371	13296	11973	9446	10314	7460	7151	7427	7408	7145	7752	19127	16812	15341	13922	14207	14088	12523	16671	17597	7691	8752	7007	7558	7509	7377	7700	7472	6923		44.5041	16012	14116	13252	9695	8635	10431	10126	9292
44.55	49634	62558	58084	25986	24005	21696	24452	25263	24197	12086	11815	13103	12297	9347	10767	7508	7330	7497	7281	7321	7854	19417	16718	15096	14135	14292	14177	12594	16837	17542	7928	8851	7157	7341	7516	7436	7570	7385	7285		44.55	16035	14070	13469	9530	8841	10432	10115	9391
44.5958	49812	62373	57921	26177	23973	21490	24289	25037	23873	11962	11215	13026	11954	9334	10376	7429	7436	7289	7467	7359	7583	19102	16820	15400	14418	13962	14286	12874	16847	17692	7664	8807	7095	7310	7773	7471	7701	7493	7130		44.5958	15937	14252	13368	9828	8835	10385	10212	9259
44.6416	49753	62633	58031	26070	23682	21881	24082	25146	23732	12065	11315	13191	11918	9473	10245	7600	7410	7179	7344	7457	7859	19628	16861	14977	14344	14291	14259	13248	16886	17482	7811	9033	7352	7532	7736	7618	7641	7686	7360		44.6416	16087	14052	13040	9603	8958	10441	9930	9397
44.6875	49583	62825	57998	25688	23766	21646	24576	25491	24294	12174	11606	13419	11826	9289	10310	7330	7261	7369	7409	7341	7821	19139	16992	15230	14435	14167	14031	13281	17032	17838	7882	8833	7342	7145	7613	7363	7758	7523	7067		44.6875	15877	14026	13100	9942	8909	10577	10085	9423
44.7333	49730	62260	58383	26399	23842	21432	24435	25244	24175	11918	11601	13441	11983	9361	10300	7376	7083	7294	7238	7591	7710	19177	16696	15166	14376	14408	13843	13231	16842	17570	7845	8750	7181	7480	7494	7303	7492	7635	7244		44.7333	15889	14130	13307	9802	9012	10358	10296	9211
44.7791	50190	62394	58494	26136	23631	22058	24364	25162	24028	12148	11823	13365	11737	9651	10538	7403	7370	7418	7439	7470	7643	19373	16757	15147	14262	14194	13967	13450	16945	17321	7761	8730	7239	7286	7651	7385	7625	7814	7225		44.7791	16094	14288	13300	9511	8780	10490	9852	9609
44.825	48744	61866	58252	25877	24128	21617	24289	25455	23907	12236	11621	13175	11943	9267	10649	7515	7514	7205	7382	7723	7711	19103	16670	15382	14233	14291	14065	13548	16838	17534	7896	8853	7196	7296	7726	7481	7666	7463	7120		44.825	15818	13959	12723	9428	8654	10282	10027	9288
44.8708	49803	62405	58369	25930	24209	21520	24837	24930	23847	12094	11240	13290	11905	9317	10537	7167	7446	7286	7330	7197	7670	19426	17057	15215	14389	14077	13959	14107	17117	17725	7842	8850	7281	7547	7464	7505	7805	7602	6917		44.8708	15680	13933	13154	9661	8698	10085	10215	9290
44.9166	49633	62655	58369	26049	23765	21886	24069	25132	23638	12192	11389	13273	11935	9444	10393	7298	7162	7292	7357	7190	7891	19025	16762	14903	14174	14427	14113	13736	17375	17262	7870	8848	7279	7421	7419	7579	7543	7592	7189		44.9166	15873	14004	13007	9822	8887	10405	10221	9319
44.9625	49747	62070	58350	25582	23155	21400	24253	25176	23868	12069	11473	13204	11835	9267	10349	7391	7155	7078	7337	7402	7927	19330	16561	15168	14363	14408	14131	14242	16914	17415	7806	8997	7324	7505	7252	7668	7606	7732	7428		44.9625	15874	14147	13081	9875	8865	10515	10134	9492
45.0083	49475	62212	58146	25694	23578	22034	24158	25177	24008	12016	11572	13374	12066	9046	10182	7489	7394	7231	7234	7250	7758	19159	16840	14893	14590	14275	14041	14409	17390	17559	7963	8920	7089	7332	7475	7496	7688	7650	7119		45.0083	15991	14113	13322	9673	8846	10542	10196	9329
45.0541	49866	62261	57844	26208	23632	21720	24342	25236	23769	11962	11300	13059	11794	9414	10415	7744	7296	7239	7361	7277	8135	19129	17094	14949	14360	14320	14122	14331	17186	17496	7652	9032	7018	7269	7545	7407	7645	7809	7279		45.0541	16057	14003	13182	9803	8918	10626	10054	9486
45.1	49457	62167	57659	25676	23547	21100	24393	25433	23998	12276	11426	13204	11926	9584	10290	7460	7495	7149	7511	7273	7840	19273	16757	15217	14001	14341	13894	14706	17084	17494	7780	8794	7160	7542	7588	7525	7675	7724	7310		45.1	15808	14487	13323	9799	8854	10489	10185	9215
45.1458	49366	62459	58222	26053	23828	21776	23905	25054	23992	12034	11472	13043	12093	9689	10453	7424	7368	7176	7422	7379	7817	19020	16849	15400	14414	14296	13922	14803	17406	17600	7645	8908	7179	7578	7735	7491	7667	7574	7312		45.1458	16058	14156	13137	9664	8927	10580	10208	9417
45.1916	50105	62181	58145	26484	23624	21459	24488	25505	24153	12407	11496	13047	12110	9529	10311	7606	7210	7204	7283	7387	7641	19284	16979	15174	14316	14433	14131	14682	17568	17786	7791	8707	7043	7357	7504	7371	7631	7714	7298		45.1916	15956	14110	13187	9559	8870	10719	9881	9319
45.2375	49440	62346	58459	26152	23478	21773	24248	25683	23658	11942	11580	13275	12062	9448	10329	7499	7393	7266	7442	7275	7813	19178	17108	15162	14348	14336	14282	15045	17387	17496	7738	9099	7183	7608	7521	7546	7534	7581	7363		45.2375	16192	13889	12827	9497	8846	10539	9963	9164
45.2833	49645	62503	58124	25959	23771	22236	24229	25264	23505	12336	11517	13071	11992	9525	10420	7602	7316	7276	7292	7279	7965	19040	17038	15123	14325	14256	14292	15540	17406	17313	7767	9011	7208	7421	7560	7248	7714	7645	7371		45.2833	16171	14011	13286	9814	8831	10670	10386	9376
45.3291	49347	62118	58006	25819	23469	21494	24132	25496	23916	11972	11430	13151	11979	9352	10626	7625	7116	7426	7510	7268	7686	19045	17132	15150	14602	13952	14250	15319	17889	17644	7817	8879	7256	7323	7586	7180	7565	7555	7525		45.3291	15714	14126	13008	9580	8697	10649	10157	9392
45.375	50103	62460	58738	25896	23482	21618	24814	24986	23899	11955	11782	13222	11784	9150	10551	7511	7406	7350	7518	7295	7822	19073	16753	15260	14235	14000	14145	15655	17657	17635	7642	8718	7009	7743	7697	7715	7716	7586	7101		45.375	15692	14043	13330	9478	8798	10570	10169	9585
45.4208	49386	62066	58650	26100	23732	21356	24160	25170	23799	12110	11447	13082	12198	9558	10422	7464	7325	7401	7421	7571	7749	19329	16788	15049	14505	14002	14043	16012	17887	17489	7879	9077	7192	7492	7572	7419	7567	7518	7307		45.4208	15809	14092	13247	9539	8974	10353	10090	9374
45.4666	49794	63076	58403	25759	23040	21684	24018	25335	23956	11917	11640	12886	12005	9517	10679	7462	7192	7481	7754	7214	7681	18978	16762	15309	14255	14141	13730	16503	17648	17342	7692	8914	7278	7616	7605	7433	7689	7683	7034		45.4666	15980	14014	13202	9420	8829	10791	10189	9500
45.5125	50165	61601	58280	25679	23787	21620	24249	25278	23712	11945	11502	13196	11735	9451	10558	7494	7475	7287	7398	7349	7813	19398	16553	15267	14380	14256	13926	17030	17650	17134	7792	9071	7235	7472	7802	7438	7554	7562	7232		45.5125	15938	13938	13106	9511	8696	10583	9988	9380
45.5583	49648	62024	58904	25906	23660	21435	24401	25002	23746	12239	11543	13087	12028	9536	10507	7341	7408	7179	7267	7371	7594	19015	16663	15213	14346	14210	14198	16715	18025	17658	7912	8914	7382	7510	7532	7434	7806	7401	7223		45.5583	15912	14052	12902	9591	8803	10774	9898	9261
45.6041	49782	62602	57688	25995	23604	21610	24274	25416	23910	12179	11607	13293	12007	9818	10776	7478	7303	7517	7565	7540	7658	19459	16712	15255	14229	14223	13870	17106	17955	17329	7752	8982	6996	7324	7416	7493	7648	7520	7220		45.6041	15743	14174	13201	9753	8791	10373	10070	9188
45.65	49073	62440	57709	25535	23600	21518	24339	24777	23904	12094	11520	13035	11984	9622	10765	7388	7385	7259	7584	7315	7630	19085	16574	15431	14300	14499	14019	17171	17751	17401	7819	9024	7348	7625	7468	7476	7784	7807	7258		45.65	15732	13945	13089	9715	8850	10455	10295	9314
45.6958	49040	62150	58415	25816	23784	21451	24006	25101	23904	11830	11633	13192	12117	9464	10278	7381	7176	7280	7452	7334	7601	18958	16936	15148	14157	14334	14183	17433	18178	17559	7997	8983	7230	7339	7722	7369	7771	7777	6969		45.6958	15622	14046	12810	9252	8552	10403	10032	9322
45.7416	49550	61975	58631	25820	23528	21643	23876	25224	23826	11891	11245	13165	11973	9714	10584	7500	7514	7331	7411	7368	7731	19124	16850	15049	14273	14617	14033	18093	17977	17492	7908	8981	7280	7458	7634	7429	7817	7483	7244		45.7416	15879	14034	12939	9640	8844	10317	10149	9453
45.7875	49371	62148	58595	25977	23684	21408	24288	25458	23611	11894	11685	13071	12207	9080	10563	7480	7195	7267	7514	7393	7670	19151	16817	15446	14105	14079	14074	18157	18072	17355	7770	9126	7126	7380	7451	7694	7516	7483	7086		45.7875	15891	14008	12940	9568	8870	10370	10191	9239
[truncated: 49 more columns]

## Sheet: ExtendedDataFig. 9c
2 uM Ab (control2)						D25KO 0.05uM						D25KO 0.1 uM						D25KO 1 uM						D25KO 2 uM						D25KO 4 uM						D25KO 10 uM				Fits D25KO
time / h	relative aggregate conc	time / h	relative aggregate conc	time / h	relative aggregate conc	time / h	relative aggregate conc	time / h	relative aggregate conc	time / h	relative aggregate conc	time / h	relative aggregate conc	time / h	relative aggregate conc	time / h	relative aggregate conc	time / h	relative aggregate conc	time / h	relative aggregate conc	time / h	relative aggregate conc	time / h	relative aggregate conc	time / h	relative aggregate conc	time / h	relative aggregate conc	time / h	relative aggregate conc	time / h	relative aggregate conc	time / h	relative aggregate conc	time / h	relative aggregate conc	time / h	relative aggregate conc	time / h	2 uM Ab (control2)	D25KO 0.05uM	D25KO 0.1 uM	D25KO 1 uM	D25KO 2 uM	D25KO 4 uM	D25KO 10 uM
0	0.00667155	0.4125	0.00736395	0.4125	0.0137821	0.275	0.00313148	0.275	0.00897104	0.275	0.00118634	0.275	-0.000212784	0.275	-0.00956773	0.275	-0.0197833	0.275	-0.0121702	0.275	0.00805585	0.6875	-0.00650102	0.275	-0.00851636	0.275	-0.00136722	0.275	0.0150469	0.275	-0.000500979	0.275	-0.00590856	0.275	-0.00293568	0.275	0.0122092	0.275	0.0149652	0	0	0	0	0	0	0	0
0.045833	-0.00260353	0.458333	-0.0167914	0.458333	-0.0113627	0.320833	-0.00296221	0.320833	0.00121005	0.320833	0.00843149	0.320833	0.00451102	0.320833	0.0146102	0.320833	-0.000942063	0.320833	0.0293484	0.320833	0.0122449	0.733333	0.00539915	0.320833	0.00883012	0.320833	-0.00714685	0.320833	-0.0103362	0.320833	0.00346131	0.320833	-0.00939558	0.320833	-0.0160662	0.320833	-0.0126699	0.320833	-0.00623088	0.021034	2.6e-06	2.6e-06	2.59e-06	2.59e-06	2.59e-06	2.59e-06	2.59e-06
0.091667	-0.00406802	0.504166	0.00942747	0.504166	-0.00241942	0.366666	-0.000169269	0.366666	-0.0101811	0.366666	-0.00961783	0.366666	-0.00429824	0.366666	-0.00504245	0.366666	0.0207254	0.366666	-0.0171782	0.366666	-0.0203008	0.779166	0.00110187	0.366666	-0.000313761	0.366666	0.00851408	0.366666	-0.00471072	0.366666	-0.00296033	0.366666	0.0153041	0.366666	0.0190019	0.366666	0.000460723	0.366666	-0.00873435	0.042068	1.06e-05	1.05e-05	1.05e-05	1.04e-05	1.04e-05	1.04e-05	1.04e-05
0.1375	-0.0111464	0.55	0.0248432	0.55	0.0175408	0.4125	-0.0217511	0.4125	-0.0280814	0.4125	-0.0154648	0.4125	0.00514937	0.4125	-0.00555963	0.4125	0.014288	0.4125	0.0253096	0.4125	-0.00547798	0.824999	-0.018897	0.4125	-0.01013	0.4125	-0.00677397	0.4125	-0.0066316	0.4125	-0.00118413	0.4125	0.0106548	0.4125	-0.0176675	0.4125	0.00892651	0.4125	-0.00840056	0.063103	2.46e-05	2.43e-05	2.39e-05	2.36e-05	2.35e-05	2.34e-05	2.34e-05
0.183333	-0.0266455	0.595833	0.0598017	0.595833	0.0464443	0.458333	-0.00423173	0.458333	-0.00630059	0.458333	0.00182188	0.458333	0.0059154	0.458333	-0.018489	0.458333	0.0141309	0.458333	0.0191707	0.458333	-0.00644468	0.870833	-0.00286486	0.458333	-0.0229045	0.458333	-0.0317569	0.458333	-0.00567116	0.458333	0.00701371	0.458333	0.00237311	0.458333	-0.00581799	0.458333	0.0175651	0.458333	0.00077886	0.084137	4.55e-05	4.45e-05	4.35e-05	4.24e-05	4.21e-05	4.17e-05	4.17e-05
0.229167	-0.0326255	0.641666	0.0833502	0.641666	0.0815692	0.504166	0.00160806	0.504166	-0.0153134	0.504166	-0.0174985	0.504166	-0.0266406	0.504166	-0.0292204	0.504166	0.00204114	0.504166	-0.00635433	0.504166	0.00676692	0.916666	-0.00650102	0.504166	-0.0195428	0.504166	-0.00341806	0.504166	-0.0100617	0.504166	-0.00378012	0.504166	0.0138512	0.504166	0.0113157	0.504166	-0.00195807	0.504166	-0.0137413	0.105171	7.5e-05	7.25e-05	6.99e-05	6.73e-05	6.65e-05	6.55e-05	6.54e-05
0.275	-0.0196892	0.6875	0.146834	0.6875	0.143394	0.55	0.00655918	0.55	-0.0163148	0.55	-0.0059317	0.55	-0.00851136	0.55	-0.0041374	0.55	0.000314021	0.55	0.0127087	0.55	-0.0190118	0.962499	0.00490331	0.55	-0.00676827	0.55	-0.0421975	0.55	-0.0347587	0.55	-0.00309696	0.55	-0.0165149	0.55	-0.0274353	0.55	0.00581663	0.55	-0.00856745	0.126205	0.000115	0.00011	0.000104	9.86e-05	9.7e-05	9.49e-05	9.48e-05
0.320833	-0.0325035	0.733333	0.265304	0.733333	0.26847	0.595833	0.0337269	0.595833	0.0323792	0.595833	0.0248284	0.595833	0.0195761	0.595833	0.014093	0.595833	-0.0100487	0.595833	-0.0131395	0.595833	-0.0293233	1.00833	0.00804363	0.595833	-0.00313761	0.595833	-0.040706	0.595833	-0.0219986	0.595833	-0.00541968	0.595833	0.00484308	0.595833	0.00811316	0.595833	-0.0235545	0.595833	-0.0284284	0.147239	0.000169	0.000158	0.000147	0.000137	0.000134	0.00013	0.00013
0.366666	-0.00113904	0.779166	0.384261	0.779166	0.399896	0.641666	0.0667344	0.641666	0.0604189	0.641666	0.0351241	0.641666	0.0379607	0.641666	-0.000387881	0.641666	-0.00314021	0.641666	-0.00926225	0.641666	-0.017884	1.05417	0.0374635	0.641666	0.00479606	0.641666	-0.00901125	0.641666	-0.0294077	0.641666	-0.0207223	0.641666	-0.00242154	0.641666	-0.0215105	0.641666	-0.0152615	0.641666	-0.0219193	0.168273	0.00024	0.000221	0.000202	0.000183	0.000178	0.000171	0.000171
0.4125	-0.0411683	0.824999	0.504066	0.824999	0.565022	0.6875	0.136812	0.6875	0.11437	0.6875	0.0287687	0.6875	0.0419185	0.6875	0.0337456	0.6875	0.0130319	0.6875	0.0144857	0.6875	-0.00338346	1.1	0.0425872	0.6875	-0.00327208	0.6875	-0.0181468	0.6875	-0.0123942	0.6875	-0.0099285	0.6875	-0.00372917	0.6875	0.00955431	0.6875	-0.0323658	0.6875	-0.00756606	0.189308	0.000335	0.000302	0.000269	0.000238	0.00023	0.000219	0.000218
0.458333	-0.0299406	0.870833	0.610399	0.870833	0.686598	0.733333	0.180864	0.733333	0.155929	0.733333	0.0845691	0.733333	0.100902	0.733333	0.0426669	0.733333	-0.0277909	0.733333	-0.00473883	0.733333	-0.0106337	1.14583	0.0533304	0.733333	-0.00179292	0.733333	-0.0326891	0.733333	-0.0218614	0.733333	-0.0279637	0.733333	-0.0032933	0.733333	-0.00613824	0.733333	0.0253398	0.733333	0.0119611	0.210342	0.000458	0.000404	0.000351	0.000303	0.00029	0.000273	0.000272
0.504166	-0.0211537	0.916666	0.717216	0.916666	0.757885	0.779166	0.274428	0.779166	0.251815	0.779166	0.120795	0.779166	0.175206	0.779166	0.0996854	0.779166	0.0204114	0.779166	-0.00667744	0.779166	0.0310956	1.19167	0.0906837	0.779166	-0.0048857	0.779166	-0.000807905	0.779166	-0.0318774	0.779166	-0.0384843	0.779166	-0.0127373	0.779166	-0.00902055	0.779166	-0.0256277	0.779166	-0.0219193	0.231376	0.000621	0.000535	0.000452	0.000379	0.00036	0.000335	0.000333
0.55	-0.00467822	0.962499	0.777544	0.962499	0.799231	0.824999	0.34971	0.824999	0.298631	0.824999	0.18956	0.824999	0.195123	0.824999	0.144033	0.824999	0.0254357	0.824999	0.0177167	0.824999	-0.00402793	1.2375	0.0887003	0.824999	0.0342447	0.824999	0.00366665	0.824999	-0.0294077	0.824999	-0.0237282	0.824999	-0.0192755	0.824999	-0.0234321	0.824999	-0.0209629	0.824999	-0.0180807	0.25241	0.000834	0.000701	0.000575	0.000467	0.00044	0.000404	0.000401
0.595833	0.0365715	1.00833	0.818936	1.00833	0.883479	0.870833	0.475266	0.870833	0.484395	0.870833	0.281205	0.870833	0.296493	0.870833	0.221868	0.870833	0.0467891	0.870833	0.0283791	0.870833	0.0223953	1.28333	0.137458	0.870833	0.0376065	0.870833	-0.0257908	0.870833	-0.0240567	0.870833	-0.0306964	0.870833	0.00992832	0.870833	-0.0165466	0.870833	-0.0166436	0.870833	-0.0184145	0.273444	0.001113	0.000912	0.000726	0.00057	0.000531	0.000481	0.000476
0.641666	0.0847775	1.05417	0.855837	1.05417	0.92301	0.916666	0.566798	0.916666	0.592548	0.916666	0.353529	0.916666	0.397864	0.916666	0.308882	0.916666	0.0620192	0.916666	0.0653743	0.916666	0.0541353	1.32917	0.186711	0.916666	0.0679964	0.916666	-0.00621465	0.916666	-0.0089641	0.916666	-0.0205857	0.916666	-0.00271213	0.916666	-0.0131839	0.916666	-0.0180258	0.916666	-0.0127399	0.294478	0.001479	0.001179	0.000908	0.000689	0.000635	0.000566	0.00056
0.6875	0.197299	1.1	0.882662	1.1	0.941934	0.962499	0.682578	0.962499	0.702704	0.962499	0.45458	0.962499	0.516852	0.962499	0.407792	0.962499	0.0819595	0.962499	0.0989768	0.962499	0.0774973	1.375	0.222743	0.962499	0.0860152	0.962499	0.0113107	0.962499	-0.0189801	0.962499	-0.0102018	0.962499	0.00150136	0.962499	-0.0299973	0.962499	-0.0323658	0.962499	0.00261474	0.315513	0.001957	0.001518	0.001131	0.000827	0.000753	0.00066	0.000652
0.733333	0.30262	1.14583	0.90172	1.14583	1.01348	1.00833	0.728154	1.00833	0.811358	1.00833	0.574824	1.00833	0.610307	1.00833	0.525061	1.00833	0.121683	1.00833	0.140172	1.00833	0.116327	1.42083	0.255964	1.00833	0.140206	1.00833	0.00702256	1.00833	-0.00512234	1.00833	0.0150749	1.00833	0.0231499	1.00833	-0.0117427	1.00833	-0.0124971	1.00833	-0.0247566	0.336547	0.002583	0.001947	0.001402	0.000986	0.000887	0.000764	0.000754
0.779166	0.413189	1.19167	0.934857	1.19167	0.989501	1.05417	0.813338	1.05417	0.830635	1.05417	0.636599	1.05417	0.712444	1.05417	0.666509	1.05417	0.166431	1.05417	0.183468	1.05417	0.160795	1.46667	0.313977	1.05417	0.163873	1.05417	0.0463613	1.05417	-0.00882689	1.05417	0.0163046	1.05417	0.0160306	1.05417	-0.0298372	1.05417	-0.0270099	1.05417	-0.0601391	0.357581	0.003401	0.00249	0.00173	0.001169	0.001039	0.000879	0.000865
0.824999	0.535351	1.2375	0.913737	1.2375	0.977707	1.1	0.869451	1.1	0.899107	1.1	0.735361	1.1	0.787386	1.1	0.724044	1.1	0.211179	1.1	0.245019	1.1	0.179162	1.5125	0.361743	1.1	0.185522	1.1	0.0472935	1.1	0.0157329	1.1	0.00264153	1.1	0.0398586	1.1	-0.0215105	1.1	-0.0249367	1.1	-0.00139082	0.378615	0.00447	0.003178	0.00213	0.00138	0.001211	0.001004	0.000987
0.870833	0.603694	1.28333	0.939349	1.28333	0.995204	1.14583	0.866023	1.14583	0.92915	1.14583	0.818744	1.14583	0.84803	1.14583	0.805887	1.14583	0.229392	1.14583	0.273775	1.14583	0.246831	1.55833	0.39546	1.14583	0.242403	1.14583	0.0817848	1.14583	0.0268466	1.14583	0.00305142	1.14583	0.0529349	1.14583	-0.0101414	1.14583	-0.0159525	1.14583	-0.0182476	0.399649	0.005865	0.004048	0.002615	0.001623	0.001405	0.001142	0.00112
0.916666	0.709625	1.32917	0.951001	1.32917	0.985224	1.19167	0.914138	1.19167	0.934157	1.19167	0.871748	1.19167	0.890927	1.19167	0.834849	1.19167	0.345109	1.19167	0.333064	1.19167	0.263749	1.60417	0.48405	1.19167	0.279919	1.19167	0.100242	1.19167	0.0357649	1.19167	0.0421278	1.19167	0.0705153	1.19167	-0.017027	1.19167	-5.75904e-05	1.19167	-0.0117385	0.420683	0.007684	0.005147	0.003203	0.001902	0.001624	0.001293	0.001265
0.962499	0.776381	1.375	0.940562	1.375	0.996241	1.2375	0.922263	1.2375	0.988984	1.2375	0.901364	1.2375	0.914929	1.2375	0.898849	1.2375	0.357356	1.2375	0.444857	1.2375	0.34334	1.65	0.518759	1.2375	0.319722	1.2375	0.126344	1.2375	0.0573062	1.2375	0.0254589	1.2375	0.0735664	1.2375	-0.00437683	1.2375	0.00875374	1.2375	0.00428373	0.441718	0.010054	0.006537	0.003917	0.002224	0.001871	0.001458	0.001424
1.00833	0.804572	1.42083	0.977099	1.42083	1.01257	1.28333	0.931531	1.28333	0.970083	1.28333	0.950047	1.28333	0.959869	1.28333	0.935569	1.28333	0.445282	1.28333	0.527571	1.28333	0.407143	1.69583	0.584541	1.28333	0.382654	1.28333	0.197005	1.28333	0.0493483	1.28333	0.0525117	1.28333	0.103787	1.28333	-0.00741927	1.28333	0.0265492	1.28333	0.0218081	0.462752	0.013134	0.008291	0.004782	0.002593	0.00215	0.001638	0.001596
1.05417	0.8684	1.46667	0.967752	1.46667	1.01503	1.32917	0.941941	1.32917	0.986731	1.32917	0.99123	1.32917	1.02409	1.32917	0.955609	1.32917	0.536976	1.32917	0.547927	1.32917	0.470945	1.74167	0.639744	1.32917	0.461452	1.32917	0.235225	1.32917	0.0787103	1.32917	0.103475	1.32917	0.118462	1.32917	0.00827329	1.32917	0.0225754	1.32917	-0.00522949	0.483786	0.017129	0.010502	0.005831	0.003018	0.002464	0.001834	0.001783
1.1	0.924416	1.5125	0.970787	1.5125	1.01063	1.375	0.934197	1.375	0.991363	1.375	1.01144	1.375	0.967018	1.375	0.993751	1.375	0.592558	1.375	0.6056	1.375	0.564232	1.7875	0.715112	1.375	0.484043	1.375	0.270089	1.375	0.110542	1.375	0.120417	1.375	0.135461	1.375	0.0121164	1.375	0.0707786	1.375	0.0298192	0.50482	0.022295	0.013286	0.007102	0.003506	0.002818	0.002048	0.001987
1.14583	0.928322	1.55833	0.995185	1.55833	0.978744	1.42083	0.996149	1.42083	1.00551	1.42083	0.997331	1.42083	1.00889	1.42083	1.05064	1.42083	0.660072	1.42083	0.711578	1.42083	0.655102	1.83333	0.723541	1.42083	0.564993	1.42083	0.304394	1.42083	0.140316	1.42083	0.134627	1.42083	0.181519	1.42083	-0.0162263	1.42083	0.0783806	1.42083	0.0683727	0.525854	0.028952	0.016785	0.00864	0.004067	0.003217	0.002281	0.002208
1.19167	0.966398	1.60417	0.942626	1.60417	1.01348	1.46667	0.973425	1.46667	1.03004							1.46667	0.772178	1.46667	0.827733	1.46667	0.726799	1.87916	0.774117	1.46667	0.603048	1.46667	0.373936	1.46667	0.207684	1.46667	0.156488	1.46667	0.196629	1.46667	0.0180411	1.46667	0.0700875	1.46667	0.0329903	0.546888	0.037486	0.021172	0.010501	0.004711	0.003666	0.002535	0.002448
1.2375	0.897445	1.65	0.979405	1.65	1.00493	1.5125	0.945876	1.5125	1.00238							1.5125	0.795729	1.5125	0.804793	1.5125	0.760795	1.925	0.789323	1.5125	0.64675	1.5125	0.477223	1.5125	0.196021	1.5125	0.188323	1.5125	0.227286	1.5125	0.0250867	1.5125	0.092375	1.5125	0.0660362	0.567923	0.04836	0.026656	0.012749	0.00545	0.004172	0.002812	0.002708
1.28333	0.971036	1.69583	0.95877	1.69583	1.02502	1.55833	0.954128	1.55833	0.987733							1.55833	0.836395	1.55833	0.824663	1.55833	0.83072	1.97083	0.841551	1.55833	0.752712	1.55833	0.505935	1.55833	0.226481	1.55833	0.238466	1.55833	0.258524	1.55833	0.00731252	1.55833	0.0944483	1.55833	0.112267	0.588957	0.062107	0.03349	0.015462	0.006298	0.004741	0.003113	0.00299
1.32917	0.979457	1.74167	0.941655	1.74167	0.989113	1.60417	0.988532	1.60417	1.01878							1.60417	0.909248	1.60417	0.970221	1.60417	0.882922	2.01667	0.879235	1.60417	0.769386	1.60417	0.564291	1.60417	0.261468	1.60417	0.282325	1.60417	0.286275	1.60417	0.0212437	1.60417	0.157164	1.60417	0.117441	0.609991	0.079318	0.041967	0.018731	0.007271	0.005382	0.00344	0.003295
1.375	0.957977	1.7875	0.957313	1.7875	0.993908	1.65	1.0058	1.65	0.974213							1.65	0.919297	1.65	0.99623	1.65	0.878571	2.0625	0.943364	1.65	0.822905	1.65	0.588155	1.65	0.29769	1.65	0.305962	1.65	0.359357	1.65	0.0225247	1.65	0.184635	1.65	0.138804	0.631025	0.100606	0.052427	0.022664	0.008387	0.006103	0.003796	0.003626
1.42083	0.955781	1.83333	0.964596	1.83333	1.01257	1.69583	1.00567	1.69583	1.00701							1.69583	0.974878	1.69583	0.976521	1.69583	0.927229	2.10833	0.94072	1.69583	0.833662	1.69583	0.725934	1.69583	0.366979	1.69583	0.348727	1.69583	0.376211	1.69583	0.0377369	1.69583	0.191373	1.69583	0.172684	0.652059	0.126554	0.065249	0.027385	0.009666	0.006913	0.004182	0.003984
1.46667	0.959808	1.87916	0.971515	1.87916	1.01452											1.74167	0.99686	1.74167	0.96909	1.74167	0.946724	2.15416	0.94072	1.74167	0.912864	1.74167	0.732273	1.74167	0.369037	1.74167	0.374824	1.74167	0.421397	1.74167	0.0212437	1.74167	0.214006	1.74167	0.195883	0.673093	0.15763	0.08084	0.033039	0.011131	0.007824	0.004603	0.004372
1.5125	0.956147	1.925	1.01327	1.925	1.02177											1.7875	0.98948	1.7875	1.01497	1.7875	0.971214	2.2	1.02584	1.7875	0.964904	1.7875	0.775713	1.7875	0.431877	1.7875	0.442866	1.7875	0.468472	1.7875	0.0521484	1.7875	0.267565	1.7875	0.184701	0.694128	0.194094	0.099618	0.039791	0.012809	0.008849	0.005059	0.004792
1.55833	0.985925	1.97083	0.953793	1.97083	0.987557											1.83333	1.00251	1.83333	0.991222	1.83333	1.0218	2.24583	0.989808	1.83333	0.999597	1.83333	0.839475	1.83333	0.484153	1.83333	0.498748	1.83333	0.531093	1.83333	0.0798505	1.83333	0.306093	1.83333	0.227761	0.715162	0.235897	0.121979	0.047823	0.014729	0.009999	0.005555	0.005246
1.60417	1.00997	2.01667	0.997977	2.01667	0.997537											1.87916	0.997017	1.87916	1.00689	1.87916	0.976208	2.29167	1.00154	1.87916	0.950247	1.87916	0.824747	1.87916	0.514064	1.87916	0.527303	1.87916	0.583543	1.87916	0.0806512	1.87916	0.298664	1.87916	0.259805	0.736196	0.282601	0.148255	0.057341	0.016924	0.011292	0.006094	0.005738
1.65	0.972134	2.0625	1.01388	2.0625	0.970319											1.925	1.00047	1.925	1.00188	1.925	1.00199	2.3375	0.967825	1.925	0.979023	1.925	0.942763	1.925	0.56922	1.925	0.554903	1.925	0.603594	1.925	0.0928209	1.925	0.352569	1.925	0.294353	0.75723	0.333365	0.17866	0.068563	0.019431	0.012742	0.006679	0.006269
1.69583	1.0179	2.10833	1.00077	2.10833	1.0092																	2.38333	1.03096	1.97083	0.988839	1.97083	0.914051	1.97083	0.57512	1.97083	0.592066	1.97083	0.634541	1.97083	0.114278	1.97083	0.358961	1.97083	0.338915	0.778264	0.386997	0.213243	0.08172	0.022293	0.01437	0.007313	0.006844
		2.15416	1.00647	2.15416	1.00855																	2.42916	1.05675	2.01667	1.0035	2.01667	0.948356	2.01667	0.618203	2.01667	0.660382	2.01667	0.697453	2.01667	0.0998666	2.01667	0.437399	2.01667	0.371794	0.799298	0.442073	0.251834	0.097044	0.025557	0.016196	0.008002	0.007465
		2.2	0.995913	2.2	0.985613																	2.475	1.04947	2.0625	0.991528	2.0625	0.908831	2.0625	0.704917	2.0625	0.683746	2.0625	0.752664	2.0625	0.159754	2.0625	0.443965	2.0625	0.386147	0.820333	0.497108	0.294023	0.114755	0.029273	0.018242	0.00875	0.008137
		2.24583	1.01218	2.24583	0.990279																	2.52083	1.01361	2.10833	1.01009	2.10833	0.975949	2.10833	0.69737	2.10833	0.72938	2.10833	0.771842	2.10833	0.167921	2.10833	0.467116	2.10833	0.434715	0.841367	0.550725	0.339161	0.135048	0.033498	0.020534	0.009561	0.008862
		2.29167	0.984503	2.29167	0.984317																	2.56666	0.966834	2.15416	1.02864	2.15416	0.972966	2.15416	0.7303	2.15416	0.779524	2.15416	0.797123	2.15416	0.177048	2.15416	0.50668	2.15416	0.471766	0.862401	0.601776	0.386402	0.158073	0.038296	0.023099	0.01044	0.009647
		2.3375	1.00332	2.3375	1.0254																	2.6125	1.01956	2.2	0.961273	2.2	0.978	2.2	0.766659	2.2	0.794963	2.2	0.834609	2.2	0.194662	2.2	0.546763	2.2	0.517497	0.883435	0.64942	0.434771	0.183914	0.043733	0.025968	0.011394	0.010494
																										2.24583	0.97222	2.24583	0.814955	2.24583	0.840461	2.24583	0.838532	2.24583	0.232933	2.24583	0.583218	2.24583	0.528846	0.904469	0.693129	0.483258	0.212571	0.049882	0.029172	0.012428	0.011409
																										2.29167	1.01753	2.29167	0.864349	2.29167	0.862322	2.29167	0.90493	2.29167	0.250547	2.29167	0.64507	2.29167	0.588929	0.925504	0.73266	0.530901	0.243941	0.056822	0.032749	0.013549	0.012396
																										2.3375	0.994593	2.3375	0.838006	2.3375	0.892654	2.3375	0.903041	2.3375	0.276648	2.3375	0.649908	2.3375	0.619138	0.946538	0.767995	0.576863	0.277811	0.064634	0.036737	0.014763	0.013463
																										2.38333	1.03356	2.38333	0.857215	2.38333	0.91957	2.38333	0.924981	2.38333	0.308513	2.38333	0.692928	2.38333	0.639499	0.967572	0.799281	0.620481	0.313857	0.073401	0.041177	0.016078	0.014614
																										2.42916	0.980983	2.42916	0.874777	2.42916	0.932823	2.42916	0.930066	2.42916	0.340859	2.42916	0.735257	2.42916	0.653185	0.988606	0.826774	0.661278	0.351656	0.083211	0.046114	0.017502	0.015856
																										2.475	0.985458	2.475	0.908941	2.475	0.951542	2.475	0.949099	2.475	0.3913	2.475	0.758754	2.475	0.707761	1.00964	0.850789	0.698964	0.390705	0.094148	0.051594	0.019044	0.017195
																												2.52083	0.923485	2.52083	0.949356	2.52083	0.941399	2.52083	0.424446	2.52083	0.783114	2.52083	0.735967	1.03067	0.871669	0.733407	0.430455	0.106293	0.057668	0.020712	0.018639
																												2.56666	0.927738	2.56666	0.964931	2.56666	0.985277	2.56666	0.430211	2.56666	0.760136	2.56666	0.777024	1.05171	0.889756	0.764608	0.470343	0.119724	0.064386	0.022516	0.020196
																												2.6125	0.952984	2.6125	0.995947	2.6125	0.981064	2.6125	0.439498	2.6125	0.786052	2.6125	0.763672	1.07274	0.90538	0.792664	0.509826	0.134507	0.071801	0.024467	0.021874
																												2.65833	0.96204	2.65833	1.03079	2.65833	0.980046	2.65833	0.534294	2.65833	0.764974	2.65833	0.772684	1.09378	0.918847	0.81774	0.548412	0.150694	0.079967	0.026576	0.023681
																												2.70417	0.961903	2.70417	0.973266	2.70417	1.00823	2.70417	0.514919	2.70417	0.786915	2.70417	0.848623	1.11481	0.930434	0.840043	0.585676	0.168322	0.088937	0.028853	0.025628
																												2.75	0.952298			2.75	0.991525	2.75	0.55479	2.75	0.830108	2.75	0.871822	1.13584	0.940392	0.8598	0.62128	0.187406	0.098764	0.031313	0.027722
																												2.79583	0.953945			2.79583	0.985422	2.79583	0.594342	2.79583	0.828208	2.79583	0.861641	1.15688	0.948941	0.877245	0.654973	0.207935	0.109497	0.033966	0.029976
																												2.84166	0.973977			2.84166	1.02305	2.84166	0.613558	2.84166	0.854815	2.84166	0.879166	1.17791	0.956274	0.89261	0.686586	0.229873	0.121183	0.036829	0.032399
																												2.8875	0.987697					2.8875	0.640459	2.8875	0.926687	2.8875	0.879499	1.19895	0.962561	0.906114	0.716027	0.253154	0.13386	0.039913	0.035004
																												2.93333	1.00444					2.93333	0.670083	2.93333	0.942064	2.93333	0.933241	1.21998	0.967948	0.917965	0.743267	0.277682	0.147563	0.043236	0.037802
																												2.97917	1.00787					2.97917	0.677929	2.97917	0.911656	2.97917	0.9279	1.24102	0.972564	0.928349	0.768332	0.30333	0.162315	0.046811	0.040806
																																		3.025	0.7162	3.025	0.929797	3.025	0.950097	1.26205	0.976516	0.937441	0.791286	0.329948	0.178129	0.050657	0.044028
																																		3.07083	0.732533	3.07083	0.980938	3.07083	0.94943	1.28308	0.979901	0.945393	0.81222	0.357361	0.195005	0.054788	0.047484
																																		3.11666	0.784254	3.11666	0.967116	3.11666	0.955772	1.30412	0.982798	0.952344	0.831249	0.385377	0.21293	0.059224	0.051185
																																		3.1625	0.750787	3.1625	0.949493	3.1625	0.960111	1.32515	0.985279	0.958418	0.848495	0.413792	0.231876	0.063981	0.055148
																																		3.20833	0.821404	3.20833	1.01394	3.20833	0.969624	1.34619	0.987402	0.963722	0.864088	0.442398	0.251797	0.069078	0.059388
																																		3.25416	0.818041	3.25416	0.974199	3.25416	0.967455	1.36722	0.989219	0.968353	0.878158	0.470989	0.272634	0.074533	0.063918
																																		3.3	0.859194	3.3	0.969362	3.3	0.978303	1.38826	0.990774	0.972395	0.890832	0.499366	0.29431	0.080363	0.068756
																																		3.34583	0.81692	3.34583	0.989576	3.34583	1.01235	1.40929	0.992105	0.975922	0.902234	0.527344	0.316735	0.086588	0.073915
																																		3.39166	0.834855	3.39166	0.960723	3.39166	0.948261	1.43032	0.993244	0.979	0.912478	0.554755	0.339806	0.093225	0.079414
																																		3.4375	0.900187	3.4375	1.02102	3.4375	0.971293	1.45136	0.994219	0.981685	0.921674	0.581453	0.363407	0.100291	0.085266
																																		3.48333	0.877769	3.48333	0.992686	3.48333	1.00217	1.47239	0.995053	0.984027	0.929922	0.607314	0.387417	0.107803	0.091487
																																		3.52916	0.888497	3.52916	0.986293	3.52916	1.02654	1.49343	0.995767	0.98607	0.937315	0.632236	0.411708	0.115777	0.098092
																																		3.575	0.903069					1.51446	0.996378	0.987852	0.943939	0.656141	0.43615	0.124226	0.105096
																																		3.62083	0.938938					1.53549	0.9969	0.989406	0.94987	0.678973	0.460612	0.133164	0.112512
																																		3.66666	0.947585					1.55653	0.997348	0.990762	0.955179	0.700694	0.48497	0.142602	0.120354
																																		3.7125	0.939258					1.57756	0.99773	0.991944	0.95993	0.721288	0.509103	0.152547	0.128631
																																		3.75833	0.983133					1.5986	0.998058	0.992975	0.96418	0.740749	0.5329	0.163007	0.137356
																																		3.80416	1.00395					1.61963	0.998338	0.993874	0.967981	0.759089	0.55626	0.173985	0.146536
																																		3.85	0.960395					1.64067	0.998578	0.994658	0.971381	0.776327	0.579093	0.185482	0.156177
																																		3.89583	0.949827					1.6617	0.998783	0.995342	0.974421	0.792495	0.601321	0.197495	0.166285
																																		3.94166	0.978329					1.68273	0.998959	0.995938	0.977139	0.807627	0.622879	0.210018	0.176862
																																		3.9875	0.977689					1.70377	0.999109	0.996458	0.979569	0.821764	0.643713	0.223041	0.187907
																																		4.03333	0.990179					1.7248	0.999238	0.996911	0.981741	0.834952	0.663782	0.23655	0.199417
																																		4.07916	0.997224					1.74584	0.999348	0.997306	0.983682	0.847237	0.683057	0.250529	0.211387
																																		4.125	0.997385					1.76687	0.999442	0.997651	0.985418	0.858667	0.701516	0.264955	0.223807
																																		4.17083	1.00539					1.78791	0.999522	0.997952	0.986969	0.869289	0.719151	0.279806	0.236667
																																								1.80894	0.999591	0.998214	0.988355	0.879153	0.735959	0.295051	0.24995
																																								1.82997	0.99965	0.998442	0.989594	0.888303	0.751944	0.310659	0.263639
																																								1.85101	0.999701	0.998642	0.990701	0.896787	0.767117	0.326596	0.277713
																																								1.87204	0.999744	0.998816	0.99169	0.904647	0.781496	0.342824	0.292147
																																								1.89308	0.999781	0.998967	0.992574	0.911925	0.795099	0.359302	0.306915
																																								1.91411	0.999812	0.999099	0.993364	0.918661	0.80795	0.37599	0.321988
																																								1.93514	0.99984	0.999215	0.99407	0.924892	0.820076	0.392845	0.337333
																																								1.95618	0.999863	0.999315	0.994701	0.930655	0.831504	0.409821	0.352918
																																								1.97721	0.999882	0.999403	0.995265	0.935983	0.842263	0.426876	0.368706
																																								1.99825	0.999899	0.999479	0.995769	0.940907	0.852382	0.443964	0.384662
																																								2.01928	0.999914	0.999546	0.996219	0.945457	0.861892	0.461042	0.400747
																																								2.04032	0.999926	0.999604	0.996621	0.94966	0.870823	0.478067	0.416924
																																								2.06135	0.999937	0.999655	0.996981	0.953543	0.879205	0.494999	0.433154
																																								2.08238	0.999946	0.999699	0.997302	0.957128	0.887066	0.511797	0.4494
																																								2.10342	0.999954	0.999737	0.997589	0.960438	0.894434	0.528426	0.465625
																																								2.12445	0.999961	0.999771	0.997846	0.963495	0.901339	0.54485	0.481792
																																								2.14548	0.999966	0.9998	0.998075	0.966316	0.907805	0.561038	0.497866
																																								2.16652	0.999971	0.999826	0.99828	0.968921	0.913859	0.576959	0.513814
																																								2.18755	0.999975	0.999848	0.998463	0.971324	0.919524	0.592589	0.529605
																																								2.20859	0.999979	0.999868	0.998627	0.973543	0.924825	0.607904	0.545208
																																								2.22962	0.999982	0.999885	0.998773	0.97559	0.929783	0.622883	0.560597
																																								2.25066	0.999985	0.999899	0.998903	0.97748	0.93442	0.637509	0.575747
																																								2.27169	0.999987	0.999912	0.99902	0.979223	0.938754	0.651767	0.590634
																																								2.29272	0.999989	0.999923	0.999124	0.980832	0.942806	0.665646	0.605239
																																								2.31376	0.99999	0.999933	0.999217	0.982316	0.946593	0.679136	0.619544
																																								2.33479	0.999992	0.999942	0.999301	0.983686	0.950132	0.69223	0.633533
																																								2.35583	0.999993	0.999949	0.999375	0.98495	0.953439	0.704924	0.647193
																																								2.37686	0.999994	0.999956	0.999442	0.986116	0.956528	0.717215	0.660514
																																								2.3979	0.999995	0.999961	0.999501	0.987191	0.959413	0.729102	0.673485
																																								2.41893	0.999996	0.999966	0.999554	0.988184	0.962108	0.740587	0.686102
																																								2.43996	0.999996	0.999971	0.999602	0.989099	0.964625	0.751672	0.698358
																																								2.461	0.999997	0.999974	0.999644	0.989944	0.966976	0.762361	0.710251
																																								2.48203	0.999997	0.999978	0.999682	0.990723	0.969172	0.77266	0.72178
																																								2.50307	0.999998	0.999981	0.999716	0.991442	0.971222	0.782574	0.732944
																																								2.5241	0.999998	0.999983	0.999746	0.992105	0.973136	0.792112	0.743745
																																								2.54514	0.999998	0.999985	0.999773	0.992717	0.974923	0.80128	0.754186
																																								2.56617	0.999999	0.999987	0.999797	0.993282	0.976591	0.810087	0.76427
																																								2.5872	0.999999	0.999989	0.999819	0.993802	0.978149	0.818543	0.774002
																																								2.60824	0.999999	0.99999	0.999838	0.994283	0.979604	0.826657	0.783388
																																								2.62927	0.999999	0.999991	0.999855	0.994726	0.980961	0.834438	0.792433
																																								2.65031	0.999999	0.999993	0.999871	0.995134	0.982229	0.841897	0.801145
																																								2.67134	0.999999	0.999993	0.999884	0.995512	0.983412	0.849044	0.809531
																																								2.69237	0.999999	0.999994	0.999897	0.99586	0.984517	0.855889	0.817599
																																								2.71341	0.999999	0.999995	0.999908	0.99618	0.985548	0.862442	0.825356
																																								2.73444	1	0.999996	0.999918	0.996476	0.986511	0.868714	0.832812
																																								2.75548	1	0.999996	0.999926	0.99675	0.987409	0.874714	0.839975
																																								2.77651	1	0.999997	0.999934	0.997002	0.988248	0.880453	0.846853
																																								2.79754	1	0.999997	0.999941	0.997234	0.989031	0.88594	0.853455
																																								2.81858	1	0.999998	0.999947	0.997448	0.989761	0.891185	0.85979
																																								2.83961	1	0.999998	0.999953	0.997646	0.990443	0.896198	0.865867
																																								2.86065	1	0.999998	0.999958	0.997829	0.99108	0.900988	0.871695
																																								2.88168	1	0.999998	0.999962	0.997997	0.991674	0.905563	0.877282
																																								2.90272	1	0.999999	0.999966	0.998152	0.992229	0.909934	0.882636
																																								2.92375	1	0.999999	0.99997	0.998295	0.992747	0.914107	0.887767
																																								2.94478	1	0.999999	0.999973	0.998428	0.99323	0.918091	0.892682
																																								2.96582	1	0.999999	0.999976	0.998549	0.993681	0.921895	0.897389
																																								2.98685	1	0.999999	0.999979	0.998662	0.994102	0.925525	0.901897
																																								3.00789	1	0.999999	0.999981	0.998766	0.994495	0.92899	0.906213
																																								3.02892	1	0.999999	0.999983	0.998861	0.994862	0.932297	0.910344
																																								3.04996	1	0.999999	0.999985	0.99895	0.995204	0.935452	0.914298
																																								3.07099	1	1	0.999986	0.999031	0.995524	0.938462	0.918082
																																								3.09202	1	1	0.999988	0.999106	0.995822	0.941333	0.921702
																																								3.11306	1	1	0.999989	0.999175	0.996101	0.944072	0.925166
																																								3.13409	1	1	0.99999	0.999239	0.99636	0.946685	0.928479
																																								3.15513	1	1	0.999991	0.999298	0.996603	0.949177	0.931648
																																								3.17616	1	1	0.999992	0.999353	0.996829	0.951554	0.934679
																																								3.19719	1	1	0.999993	0.999403	0.997041	0.95382	0.937578
																																								3.21823	1	1	0.999994	0.999449	0.997238	0.955982	0.940349
																																								3.23926	1	1	0.999994	0.999492	0.997422	0.958043	0.943
																																								3.2603	1	1	0.999995	0.999531	0.997594	0.960008	0.945533
																																								3.28133	1	1	0.999996	0.999568	0.997754	0.961881	0.947956
																																								3.30236	1	1	0.999996	0.999601	0.997904	0.963668	0.950272
																																								3.3234	1	1	0.999996	0.999632	0.998043	0.965371	0.952485
																																								3.34443	1	1	0.999997	0.999661	0.998174	0.966994	0.954601
																																								3.36547	1	1	0.999997	0.999687	0.998296	0.968542	0.956624
																																								3.3865	1	1	0.999997	0.999711	0.998409	0.970018	0.958557
																																								3.40754	1	1	0.999998	0.999734	0.998515	0.971424	0.960404
																																								3.42857	1	1	0.999998	0.999754	0.998614	0.972765	0.96217
																																								3.4496	1	1	0.999998	0.999773	0.998706	0.974043	0.963857
																																								3.47064	1	1	0.999998	0.999791	0.998793	0.975262	0.96547
																																								3.49167	1	1	0.999999	0.999807	0.998873	0.976423	0.967011
																																								3.51271	1	1	0.999999	0.999822	0.998948	0.97753	0.968483
																																								3.53374	1	1	0.999999	0.999836	0.999018	0.978585	0.96989
																																								3.55477	1	1	0.999999	0.999849	0.999084	0.979591	0.971235
																																								3.57581	1	1	0.999999	0.99986	0.999145	0.980549	0.972519
																																								3.59684	1	1	0.999999	0.999871	0.999202	0.981463	0.973747
																																								3.61788	1	1	0.999999	0.999881	0.999255	0.982334	0.974919
																																								3.63891	1	1	0.999999	0.99989	0.999305	0.983163	0.97604
																																								3.65995	1	1	0.999999	0.999899	0.999351	0.983954	0.97711
																																								3.68098	1	1	0.999999	0.999907	0.999394	0.984708	0.978133
																																								3.70201	1	1	1	0.999914	0.999435	0.985427	0.979111
																																								3.72305	1	1	1	0.999921	0.999472	0.986112	0.980044
																																								3.74408	1	1	1	0.999927	0.999507	0.986764	0.980936
																																								3.76512	1	1	1	0.999932	0.99954	0.987386	0.981789
																																								3.78615	1	1	1	0.999938	0.999571	0.987979	0.982603
																																								3.80719	1	1	1	0.999942	0.999599	0.988544	0.983381
																																								3.82822	1	1	1	0.999947	0.999626	0.989082	0.984124
																																								3.84925	1	1	1	0.999951	0.999651	0.989595	0.984834
																																								3.87029	1	1	1	0.999955	0.999674	0.990084	0.985512
																																								3.89132	1	1	1	0.999958	0.999696	0.99055	0.98616
																																								3.91236	1	1	1	0.999962	0.999716	0.990995	0.986779
																																								3.93339	1	1	1	0.999965	0.999735	0.991418	0.98737
																																								3.95442	1	1	1	0.999967	0.999753	0.991821	0.987935
																																								3.97546	1	1	1	0.99997	0.999769	0.992206	0.988475
																																								3.99649	1	1	1	0.999972	0.999785	0.992572	0.98899
																																								4.01753	1	1	1	0.999974	0.999799	0.992921	0.989483
																																								4.03856	1	1	1	0.999976	0.999812	0.993254	0.989953
																																								4.05959	1	1	1	0.999978	0.999825	0.993571	0.990403
																																								4.08063	1	1	1	0.99998	0.999837	0.993873	0.990832
																																								4.10166	1	1	1	0.999981	0.999847	0.994161	0.991242
																																								4.1227	1	1	1	0.999983	0.999858	0.994436	0.991634
																																								4.14373	1	1	1	0.999984	0.999867	0.994698	0.992008
																																								4.16477	1	1	1	0.999985	0.999876	0.994947	0.992366
																																								4.1858	1	1	1	0.999987	0.999884	0.995184	0.992707

## Sheet: Extended Data Fig. 9e
2 uM Ab control						DAm_012 0.1 uM						DAm_012 0.25 uM						DAm_012 0.5 uM						Dam_012 1 uM						Fits DAm12							2 uM Ab control						Dam_014 0.1 uM						Dam_014 0.25 uM
time / h	relative aggregate conc	time / h	relative aggregate conc	time / h	relative aggregate conc	time / h	relative aggregate conc	time / h	relative aggregate conc	time / h	relative aggregate conc	time / h	relative aggregate conc	time / h	relative aggregate conc	time / h	relative aggregate conc	time / h	relative aggregate conc	time / h	relative aggregate conc	time / h	relative aggregate conc	time / h	relative aggregate conc	time / h	relative aggregate conc	time / h	relative aggregate conc	time / h	2 uM Ab control	DAm_012 0.1 uM	DAm_012 0.25 uM	DAm_012 0.5 uM			time / h	relative aggregate conc	time / h	relative aggregate conc	time / h	relative aggregate conc	time / h	relative aggregate conc	time / h	relative aggregate conc	time / h	relative aggregate conc	time / h
0.229168	-0.00601208	0.229168	0.00204093	0.275002	-0.00750564	0.045833	0.0121234	0.366669	-0.0074071	0.275002	-0.00772799	0.366669	-0.00658703	0.50417	0.0144476	0.412503	-0.00726088	0.50417	-0.00145292	0.87084	0.00892587	0.779172	-0.00330148	1.46668	0.00815604	1.46668	0.00289288	1.37501	-0.000613025	0.045833	5.37202e-06	4.84207e-06	4.1083e-06	3.04019e-06			0.229168	-0.00601208	0.229168	0.00204093	0.275002	-0.00750564	0.229168	0.00568082	0.045833	0.0106673	0.275002	0.00269448	0.366669
0.275002	0.00647813	0.275002	-0.00324184	0.320835	0.00720518	0.0916667	-0.00705926	0.412503	0.00109033	0.320835	0.00196747	0.412503	-0.010801	0.550004	-0.000686424	0.458336	0.0119073	0.550004	-0.00409599	0.916673	-0.00366793	0.825006	0.0140115	1.51251	0.0221762	1.51251	0.021116	1.42084	0.0120717	0.0726384	1.41292e-05	1.26549e-05	1.06478e-05	7.79231e-06			0.275002	0.00647813	0.275002	-0.00324184	0.320835	0.00720518	0.275002	-0.0128957	0.0916667	-0.00489251	0.320835	-0.00202698	0.412503
0.320835	-0.000466053	0.320835	0.00120091	0.366669	0.000300459	0.1375	-0.0050641	0.458336	0.00631678	0.366669	0.00576052	0.458336	0.0173881	0.595837	-0.0137612	0.50417	-0.00464644	0.595837	0.0055489	0.962507	-0.00525793	0.87084	-0.01071	1.55835	0.0212119	1.55835	-0.0105601	1.46668	0.0184197	0.0994437	2.82929e-05	2.51134e-05	2.08796e-05	1.50382e-05			0.320835	-0.000466053	0.320835	0.00120091	0.366669	0.000300459	0.320835	0.00721489	0.1375	-0.00577482	0.366669	-0.000667495	0.458336
0.366669	-0.00710264	0.366669	-0.0111287	0.412503	0.0066276	0.183334	-0.00320403	0.50417	-0.010927	0.412503	-0.0144817	0.50417	-0.0303067	0.641671	0.0172096	0.550004	-0.0206615	0.641671	-0.0177866	1.00834	0.0113109	0.916673	0.0161508	1.60418	-0.00279786	1.60418	0.0107181	1.51251	-0.0134576	0.126249	4.96726e-05	4.3586e-05	3.56878e-05	2.51799e-05			0.366669	-0.00710264	0.366669	-0.0111287	0.412503	0.0066276	0.366669	-0.00212367	0.183334	-0.000793464	0.412503	-0.00898057	0.50417
0.412503	0.00621714	0.412503	-0.0251943	0.458336	-0.00436395	0.229168	-0.00257015	0.550004	0.0028147	0.458336	0.00229853	0.550004	-0.013339	0.687505	-0.0233221	0.595837	-0.0110183	0.687505	-0.0235596	1.05417	0.00752515	0.962507	0.00458245	1.65001	-0.000901782	1.65001	-0.0100062	1.55835	-0.00433509	0.153054	8.09987e-05	7.01018e-05	5.63519e-05	3.878e-05			0.412503	0.00621714	0.412503	-0.0251943	0.458336	-0.00436395	0.412503	-0.00371642	0.229168	0.00531835	0.458336	-0.0152544	0.550004
0.458336	-0.00507997	0.458336	0.00517699	0.50417	0.0160527	0.275002	-0.00729826	0.595837	0.00539237	0.50417	0.00293228	0.595837	-0.00411291	0.733339	-0.0249891	0.641671	-0.00980963	0.733339	-0.00489586	1.10001	0.0501144	1.00834	-0.00343354	1.69585	-0.00773849	1.69585	-0.00637946	1.60418	0.00391967	0.17986	0.000126272	0.000107573	8.46571e-05	5.6593e-05			0.458336	-0.00507997	0.458336	0.00517699	0.50417	0.0160527	0.458336	-0.0185877	0.275002	-0.0155905	0.50417	0.00290575	0.595837
0.50417	-0.0026565	0.50417	-0.00213115	0.550004	0.0193956	0.320835	-0.0230205	0.641671	0.0185296	0.550004	-0.011067	0.641671	-0.0108808	0.779172	0.0149869	0.687505	-0.0206484	0.779172	-0.0213223	1.14584	0.00930444	1.05417	0.0152792	1.74168	0.000582574	1.74168	-0.00234179	1.65001	-0.00681266	0.206665	0.000191271	0.000160113	0.000123048	7.96068e-05			0.50417	-0.0026565	0.50417	-0.00213115	0.550004	0.0193956	0.50417	-0.00408527	0.320835	-0.00844012	0.550004	-0.00785991	0.641671
0.550004	0.00656202	0.550004	-0.00706859	0.595837	0.0586537	0.366669	-0.0208487	0.687505	0.0236138	0.595837	-0.0240826	0.687505	-0.0197239	0.825006	0.0110482	0.733339	-0.0279531	0.825006	0.00237258	1.19168	0.035022	1.10001	0.0406742	1.78751	-0.0067742	1.78751	-0.0177242	1.69585	-0.000327591	0.233471	0.000284289	0.000233488	0.00017484	0.000109098			0.550004	0.00656202	0.550004	-0.00706859	0.595837	0.0586537	0.550004	0.0136781	0.366669	-0.0139821	0.595837	0.0182551	0.687505
0.595837	0.0484788	0.595837	0.00467298	0.641671	0.105945	0.412503	-0.000813997	0.733339	0.0432752	0.641671	-0.00554296	0.733339	0.020804	0.87084	0.0272935	0.779172	0.0162428	0.87084	-0.00844314	1.23751	0.0158285	1.14584	0.0145793	1.83335	-0.0235247	1.83335	-0.00648665	1.74168	-0.0193946	0.260276	0.000417188	0.000335747	0.000244504	0.000146701			0.595837	0.0484788	0.595837	0.00467298	0.641671	0.105945	0.595837	0.032548	0.412503	-0.033448	0.641671	0.0332737	0.733339
0.641671	0.0881306	0.641671	0.0349603	0.687505	0.205981	0.458336	-0.0186457	0.779172	0.0862335	0.687505	0.0176694	0.779172	-0.000585278	0.916673	-0.00119307	0.825006	-3.50344e-05	0.916673	-0.01752	1.28334	0.0301763	1.19168	0.0280229	1.87918	0.00264117	1.87918	0.0287268	1.78751	0.00687677	0.287081	0.000606897	0.000478099	0.000338049	0.000194501			0.641671	0.0881306	0.641671	0.0349603	0.687505	0.205981	0.641671	0.0524407	0.458336	-0.0197079	0.687505	0.0664985	0.779172
0.687505	0.132284	0.687505	0.0671889	0.733339	0.265848	0.50417	0.00116038	0.825006	0.114437	0.733339	0.0172343	0.825006	0.0111788	0.962507	0.0484419	0.87084	0.00205389	0.962507	-0.0194443	1.32918	0.0235513	1.23751	0.086261	1.92501	-0.0178473	1.92501	0.00682335	1.83335	-3.07391e-05	0.313887	0.000877548	0.000676129	0.00046354	0.000255147			0.687505	0.132284	0.687505	0.0671889	0.733339	0.265848	0.687505	0.0634642	0.50417	-0.0161971	0.733339	0.0975462	0.825006
0.733339	0.172029	0.733339	0.126317	0.779172	0.374442	0.550004	0.00997232	0.87084	0.184638	0.779172	0.0332578	0.87084	0.0553939	1.00834	0.0629059	0.916673	0.0152443	1.00834	-0.0106457	1.37501	0.0273749	1.28334	0.0861025	1.97085	-0.00272201	1.97085	0.00771664	1.87918	0.00460471	0.340692	0.0012635	0.00095149	0.000631787	0.000331996			0.733339	0.172029	0.733339	0.126317	0.779172	0.374442	0.733339	0.101497	0.550004	-0.00347715	0.779172	0.131506	0.87084
0.779172	0.266862	0.779172	0.231478	0.825006	0.464238	0.595837	0.037333	0.916673	0.242947	0.825006	0.0497448	0.916673	0.056607	1.05417	0.0781053	0.962507	0.0439244	1.05417	-0.0124889	1.42084	0.0318547	1.32918	0.0287493	2.01668	0.00753846	2.01668	-0.0244954	1.92501	-0.000921294	0.367497	0.00181363	0.00133423	0.000857262	0.000429304			0.779172	0.266862	0.779172	0.231478	0.825006	0.464238	0.779172	0.179023	0.595837	0.0105846	0.825006	0.20151	0.916673
0.825006	0.350863	0.825006	0.350135	0.87084	0.596583	0.641671	0.0641533	0.962507	0.286705	0.87084	0.101627	0.962507	0.103216	1.10001	0.0851002	1.00834	0.0352402	1.10001	-0.0150044	1.46668	0.0619385	1.37501	0.0830784	2.06252	0.00255449	2.06252	0.0181324	1.97085	-0.000110661	0.394303	0.00259728	0.00186599	0.00115933	0.000552452			0.825006	0.350863	0.825006	0.350135	0.87084	0.596583	0.825006	0.228767	0.641671	0.0240949	0.87084	0.27405	0.962507
0.87084	0.466239	0.87084	0.459766	0.916673	0.664361	0.687505	0.119436	1.00834	0.382941	0.916673	0.174291	1.00834	0.131549	1.14584	0.15608	1.05417	0.0654837	1.14584	-0.0059044	1.51251	0.0640837	1.42084	0.0941846	2.10835	-0.00149769	2.10835	0.00939603	2.01668	-0.00371855	0.421108	0.00371272	0.0026044	0.00156388	0.000708246			0.87084	0.466239	0.87084	0.459766	0.916673	0.664361	0.87084	0.281143	0.687505	0.0735225	0.916673	0.338791	1.00834
0.916673	0.551014	0.916673	0.619827	0.962507	0.778328	0.733339	0.276139	1.05417	0.464333	0.962507	0.232738	1.05417	0.182197	1.19168	0.139883	1.10001	0.089329	1.19168	0.0102438	1.55835	0.0634023	1.46668	0.0767131	2.15418	-0.00947204	2.15418	-0.0343394	2.06252	0.0133961	0.447913	0.00529864	0.00362908	0.00210547	0.000905286			0.916673	0.551014	0.916673	0.619827	0.962507	0.778328	0.916673	0.357025	0.733339	0.10796	0.962507	0.389652	1.05417
0.962507	0.665635	0.962507	0.716317	1.00834	0.826635	0.779172	0.464983	1.10001	0.520527	1.00834	0.288508	1.10001	0.174088	1.23751	0.229347	1.14584	0.101495	1.23751	0.0256038	1.60418	0.0712639	1.51251	0.0983444	2.20002	-0.0142718	2.20002	0.0225631	2.10835	0.00705945	0.474719	0.00754996	0.00504963	0.00283019	0.00115443			0.962507	0.665635	0.962507	0.716317	1.00834	0.826635	0.962507	0.408597	0.779172	0.155697	1.00834	0.470762	1.10001
1.00834	0.769518	1.00834	0.777507	1.05417	0.866112	0.825006	0.640702	1.14584	0.620558	1.05417	0.398819	1.14584	0.225231	1.28334	0.266251	1.19168	0.116761	1.28334	0.0133042	1.65001	0.0583042	1.55835	0.118774	2.24585	0.00402801	2.24585	-0.00126984	2.15418	0.0146177	0.501524	0.0107387	0.00701644	0.00379937	0.00146939			1.00834	0.769518	1.00834	0.777507	1.05417	0.866112	1.00834	0.511153	0.825006	0.197689	1.05417	0.550916	1.14584
1.05417	0.835017	1.05417	0.864459	1.10001	0.937487	0.87084	0.805614	1.19168	0.715701	1.10001	0.465353	1.19168	0.227769	1.32918	0.251362	1.23751	0.128454	1.32918	0.0258704	1.69585	0.0716299	1.60418	0.110956	2.29168	-0.00530068	2.29168	0.0142019	2.20002	0.0156681	0.52833	0.0152412	0.00973468	0.00509446	0.00186744			1.05417	0.835017	1.05417	0.864459	1.10001	0.937487	1.05417	0.575224	0.87084	0.271224	1.10001	0.617017	1.19168
1.10001	0.903788	1.10001	0.892356	1.14584	0.961658	0.916673	0.892185	1.23751	0.755486	1.14584	0.561523	1.23751	0.266812	1.37501	0.315968	1.28334	0.169615	1.37501	0.0257777	1.74168	0.0739518	1.65001	0.147259	2.33752	-0.00176856	2.33752	0.0105573	2.24585	-0.00523706	0.555135	0.0215705	0.0134821	0.00682322	0.00237038			1.10001	0.903788	1.10001	0.892356	1.14584	0.961658	1.10001	0.651584	0.916673	0.330862	1.14584	0.688766	1.23751
1.14584	0.965876	1.14584	0.948675	1.19168	0.959313	0.962507	0.954191	1.28334	0.843073	1.19168	0.655876	1.28334	0.297683	1.42084	0.346857	1.32918	0.179823	1.42084	0.0406044	1.78751	0.0826084	1.69585	0.119157	2.38335	0.021071	2.38335	0.00752012	2.29168	0.0107701	0.58194	0.0304133	0.0186309	0.00912764	0.00300561			1.14584	0.965876	1.14584	0.948675	1.19168	0.959313	1.14584	0.705545	0.962507	0.418918	1.19168	0.721596	1.28334
1.19168	0.952369	1.19168	0.974585	1.23751	1.00038	1.00834	0.975753	1.32918	0.867037	1.23751	0.704211	1.32918	0.393663	1.46668	0.383744	1.37501	0.192396	1.46668	0.0689594	1.83335	0.109197	1.74168	0.149597	2.42919	0.00429888	2.42919	-0.00655812	2.33752	0.0295973	0.608746	0.0426622	0.0256722	0.0121937	0.0038076			1.19168	0.952369	1.19168	0.974585	1.23751	1.00038	1.19168	0.784746	1.00834	0.50191	1.23751	0.750651	1.32918
1.23751	1.00189	1.23751	1.00681	1.28334	1.00661	1.05417	0.984181	1.37501	0.920403	1.28334	0.767728	1.37501	0.36897	1.51251	0.451553	1.42084	0.233452	1.51251	0.0557556	1.87918	0.116579	1.78751	0.16131	2.47502	0.0162387	2.47502	-0.000555214	2.38335	0.035717	0.635551	0.0594312	0.0352408	0.0162631	0.00481959			1.23751	1.00189	1.23751	1.00681	1.28334	1.00661	1.23751	0.810641	1.05417	0.611904	1.28334	0.79792	1.37501
1.28334	0.989784	1.28334	0.984245	1.32918	0.975345	1.10001	1.03596	1.42084	0.975023	1.32918	0.824795	1.42084	0.444854	1.55835	0.486773	1.46668	0.267308	1.55835	0.0626879	1.92501	0.127356	1.83335	0.168428	2.52085	0.0250149	2.52085	0.010593	2.42919	0.0482076	0.662356	0.082027	0.0481331	0.0216466	0.00609573			1.28334	0.989784	1.28334	0.984245	1.32918	0.975345	1.28334	0.853662	1.10001	0.656011	1.32918	0.799509	1.42084
1.32918	1.02219	1.32918	0.979242	1.37501	1.00104	1.14584	1.00638	1.46668	0.940171	1.37501	0.866868	1.46668	0.448573	1.60418	0.568539	1.51251	0.304922	1.60418	0.082453	1.97085	0.113311	1.87918	0.191076	2.56669	0.0185682	2.56669	-0.00918439	2.47502	0.0518726	0.689162	0.111842	0.065307	0.028738	0.00770365			1.32918	1.02219	1.32918	0.979242	1.37501	1.00104	1.32918	0.857016	1.14584	0.697203	1.37501	0.86031	1.46668
1.37501	1.04338	1.37501	1.04243	1.42084	1.0212	1.19168	0.994042	1.51251	0.985938	1.42084	0.909188	1.51251	0.546309	1.65001	0.578231	1.55835	0.322592	1.65001	0.0846439	2.01668	0.147697	1.92501	0.212193	2.61252	0.0121107	2.61252	0.0101643	2.52085	0.0422592	0.715967	0.150135	0.0878442	0.0380265	0.00972749			1.37501	1.04338	1.37501	1.04243	1.42084	1.0212	1.37501	0.894529	1.19168	0.750776	1.42084	0.857664	1.51251
1.42084	1.05808	1.42084	0.988221	1.46668	1.01823	1.23751	0.996536	1.55835	0.977414	1.46668	0.914078	1.55835	0.510729	1.69585	0.616474	1.60418	0.394036	1.69585	0.0968044	2.06252	0.175371	1.97085	0.225174	2.65835	0.0213311	2.65835	0.00994987	2.56669	0.0638038	0.742772	0.19769	0.116855	0.0501043	0.0122715			1.42084	1.05808	1.42084	0.988221	1.46668	1.01823	1.42084	0.932043	1.23751	0.826406	1.46668	0.922341	1.55835
1.46668	1.00795	1.46668	1.02245	1.51251	0.995298	1.28334	0.995622	1.60418	0.987601	1.51251	0.91945	1.60418	0.591019	1.74168	0.650158	1.65001	0.369508	1.74168	0.0981259	2.10835	0.152556	2.01668	0.19756	2.70419	0.0158487	2.70419	0.0162922	2.61252	0.0410946	0.769578	0.254431	0.153303	0.0656614	0.0154643			1.46668	1.00795	1.46668	1.02245	1.51251	0.995298	1.46668	0.958499	1.28334	0.828842	1.51251	0.938912	1.60418
1.51251	0.994631	1.51251	1.02387	1.55835	0.998326	1.32918	1.00784	1.65001	0.982401	1.55835	0.97768	1.65001	0.610844	1.78751	0.706608	1.69585	0.443461	1.78751	0.102925	2.15418	0.162399	2.06252	0.232094	2.75002	0.0251557	2.75002	-0.0314809	2.65835	0.0547612	0.796383	0.319126	0.197761	0.0854609	0.0194629			1.51251	0.994631	1.51251	1.02387	1.55835	0.998326	1.51251	0.934432	1.32918	0.893213	1.55835	0.91344	1.65001
1.55835	0.997418	1.55835	1.00364	1.60418	1.00929			1.69585	1.00597	1.60418	0.953493	1.69585	0.630254	1.83335	0.74611	1.74168	0.435132	1.83335	0.127745	2.20002	0.209771	2.10835	0.237403	2.79585	0.0366513	2.79585	-0.0189748	2.70419	0.0662813	0.823188	0.389387	0.250141	0.110284	0.0244581			1.55835	0.997418	1.55835	1.00364	1.60418	1.00929	1.55835	0.985593	1.37501	0.830781	1.60418	0.899386	1.69585
		1.60418	1.01438	1.65001	0.992384			1.74168	1.02976	1.65001	0.98817	1.74168	0.696129	1.87918	0.79161	1.78751	0.507587	1.87918	0.14431	2.24585	0.210931	2.15418	0.217224	2.84169	0.0302155	2.84169	-0.00160929	2.75002	0.0626164	0.849994	0.462039	0.309493	0.140834	0.0306784					1.60418	1.01438	1.65001	0.992384	1.60418	0.95647	1.42084	0.937687	1.65001	0.958147	1.74168
		1.65001	0.991404					1.78751	1.00614	1.69585	1.00735	1.78751	0.73953	1.92501	0.821453	1.83335	0.538225	1.92501	0.144507	2.29168	0.219676	2.20002	0.212061	2.88752	0.0513649	2.88752	0.020848	2.79585	0.0604471	0.876799	0.533739	0.373993	0.177609	0.0383938					1.65001	0.991404			1.65001	1.01176	1.46668	0.931897	1.69585	0.957191	1.78751
		1.69585	0.994213					1.83335	0.97505	1.74168	0.985947	1.83335	0.760664	1.97085	0.863358	1.87918	0.555409	1.97085	0.151439	2.33752	0.221342	2.24585	0.271183	2.93336	0.0400643	2.93336	0.0192579	2.84169	0.0611093	0.903605	0.601602	0.441174	0.220744	0.0479173					1.69585	0.994213			1.69585	1.01093	1.51251	0.940233	1.74168	0.941392	1.83335
								1.87918	1.0012	1.78751	0.98607	1.87918	0.769268	2.01668	0.928503	1.92501	0.61269	2.01668	0.165176	2.38335	0.229368	2.29168	0.274062	2.97919	0.0632397	2.97919	-0.016152	2.88752	0.0726865	0.93041	0.663588	0.508337	0.269883	0.0596029									1.74168	0.984226	1.55835	0.90881	1.78751	0.960462	1.87918
								1.92501	1.01999	1.83335	0.96561	1.92501	0.843316	2.06252	0.939633	1.97085	0.598725	2.06252	0.145423	2.42919	0.237343	2.33752	0.313469	3.02502	0.021071	3.02502	0.0237422	2.93336	0.0912626	0.957215	0.718591	0.573008	0.324105	0.0738378									1.78751	0.989885	1.60418	0.99057	1.83335	0.948842	1.92501
								1.97085	1.02139	1.87918	1.00188	1.97085	0.844226	2.10835	0.959588	2.01668	0.656269	2.10835	0.170671	2.47502	0.25029	2.38335	0.308556	3.07086	0.0618312	3.07086	0.0147022	2.97919	0.0891732	0.984021	0.766301	0.633264	0.381976	0.0910276									1.83335	0.991301	1.65001	0.991728	1.87918	0.946279	1.97085
								2.01668	1.01566	1.92501	1.00723	2.01668	0.862646	2.15418	0.959523	2.06252	0.687576	2.15418	0.171807	2.52085	0.265446	2.42919	0.329712	3.11669	0.0536402	3.11669	0.022849	3.02502	0.0668065	1.01083	0.806976	0.687879	0.441709	0.111571									1.87918	0.989633	1.69585	0.947962	1.92501	0.950569	2.01668
								2.06252	1.01235	1.97085	1.00671	2.06252	0.886078	2.20002	0.966567	2.10835	0.729118	2.20002	0.187445	2.56669	0.273535	2.47502	0.352836	3.16252	0.0581799	3.16252	0.0358374	3.07086	0.101938	1.03763	0.84121	0.736287	0.501408	0.135824									1.92501	1.01094	1.74168	0.945058	1.97085	0.952736	2.06252
								2.10835	0.983103	2.01668	1.02155	2.10835	0.908745	2.24585	1.04407	2.15418	0.726951	2.24585	0.222733	2.61252	0.273964	2.52085	0.324865	3.20836	0.05896	3.20836	0.0421261	3.11669	0.0946078	1.06444	0.869752	0.778443	0.559321	0.164055									1.97085	1.02554	1.78751	0.98478	2.01668	0.949797	2.10835
								2.15418	1.02528	2.06252	1.02013	2.15418	0.916774	2.29168	1.03395	2.20002	0.766154	2.29168	0.232714	2.65835	0.277749	2.56669	0.361248	3.25419	0.0522425	3.25419	0.0223666	3.16252	0.105043	1.09124	0.893387	0.814659	0.614028	0.19639									2.01668	1.00033	1.83335	0.964395	2.06252	0.978144	2.15418
								2.20002	0.97633	2.10835	1.00325	2.20002	0.947676	2.33752	1.06155	2.24585	0.80072	2.33752	0.23931	2.70419	0.293939	2.61252	0.386114	3.30003	0.0715175	3.30003	0.0245283	3.20836	0.109508	1.11805	0.912864	0.845456	0.664537	0.23277									2.06252	0.980102	1.87918	0.982133	2.10835	0.987863	2.20002
								2.24585	1.0233	2.15418	1.01307	2.24585	0.912033	2.38335	1.03312	2.29168	0.820401	2.38335	0.25234	2.75002	0.31119	2.65835	0.368577	3.34586	0.0816154	3.34586	0.0351406	3.25419	0.108115	1.14485	0.928858	0.871444	0.710284	0.272908									2.10835	0.995728	1.92501	0.951087	2.15418	1.01287	2.24585
								2.29168	1.00037	2.20002	0.984122	2.29168	0.896837	2.42919	1.01313	2.33752	0.828349	2.42919	0.267375	2.79585	0.343671	2.70419	0.38585	3.39169	0.0797085	3.39169	0.0161314	3.30003	0.102463	1.17166	0.94196	0.89325	0.751073	0.316283									2.15418	1.02601	1.97085	0.950949	2.20002	0.959102	2.29168
										2.24585	1.01709	2.33752	0.957541	2.47502	1.03253	2.38335	0.825117	2.47502	0.268453	2.84169	0.353034	2.75002	0.421797	3.43753	0.0729368	3.43753	0.069693	3.34586	0.119144	1.19846	0.952674	0.911471	0.786989	0.36216									2.20002	0.993221	2.01668	0.964699	2.24585	0.987532	2.33752
										2.29168	0.986042	2.38335	0.976057	2.52085	1.05028	2.42919	0.896627	2.52085	0.255852	2.88752	0.3666	2.79585	0.421718	3.48336	0.0791884	3.48336	0.0519523	3.39169	0.135048	1.22527	0.961425	0.926651	0.818302	0.409643									2.24585	1.01364	2.06252	1.02018	2.29168	0.999051	2.38335
										2.33752	1.01711	2.42919	0.954636	2.56669	1.0584	2.47502	0.893697	2.56669	0.26035	2.93336	0.371862	2.84169	0.456119	3.52919	0.0964481	3.52919	0.0219735	3.43753	0.136053	1.25207	0.968565	0.93927	0.845393	0.457755									2.29168	0.981753	2.10835	0.990598	2.33752	0.9968	2.42919
										2.38335	0.997061	2.47502	1.02316	2.61252	1.09135	2.52085	0.925806	2.61252	0.30621	2.97919	0.391825	2.88752	0.438066	3.57503	0.0939345	3.57503	0.0547394	3.48336	0.146591	1.27888	0.974389	0.949742	0.868693	0.505525									2.33752	1.0114	2.15418	1.02295	2.38335	0.944221	2.47502
										2.42919	0.99743	2.52085	0.988044	2.65835	1.05747	2.56669	0.937262	2.65835	0.350029	3.02502	0.417581	2.93336	0.49229	3.62086	0.101616	3.62086	0.0567939	3.52919	0.148053	1.30569	0.979137	0.958423	0.888641	0.552066									2.38335	1.00684	2.20002	1.00954	2.42919	0.976601	2.52085
										2.47502	1.02718	2.56669	1.03073	2.70419	1.04979	2.61252	0.919762	2.70419	0.344186	3.07086	0.406665	2.97919	0.446597	3.6667	0.100999	3.6667	0.0936511	3.57503	0.158716	1.33249	0.983006	0.965614	0.905662	0.596638											2.24585	1.01238	2.47502	0.973735	2.56669
										2.52085	1.02469	2.61252	0.970151	2.75002	1.09713	2.65835	0.915112	2.75002	0.34938	3.11669	0.414237	3.02502	0.481395	3.71253	0.096914	3.71253	0.0612425	3.62086	0.134352	1.3593	0.986158	0.971566	0.920147	0.638676											2.29168	1.02656	2.52085	0.982223	2.61252
										2.56669	1.00229	2.65835	0.972417	2.79585	1.04029	2.70419	0.934635	2.79585	0.389687	3.16252	0.453053	3.07086	0.514872	3.75836	0.103686	3.75836	0.0933652	3.6667	0.126257	1.3861	0.988726	0.976491	0.932449	0.677797											2.33752	1.06498	2.56669	0.997012	2.65835
										2.61252	1.00812	2.70419	0.976568	2.84169	1.01367	2.75002	0.991509	2.84169	0.379207	3.20836	0.490834	3.11669	0.515123	3.8042	0.113675	3.8042	0.0674777	3.71253	0.164322	1.41291	0.990818	0.980565	0.942883	0.713789											2.38335	1.00423	2.61252	0.989525
										2.65835	0.989589	2.75002	1.04923	2.88752	0.985721	2.79585	0.959623	2.88752	0.393999	3.25419	0.485926	3.16252	0.549485	3.85003	0.123221	3.85003	0.0495047	3.75836	0.16471	1.43971	0.992522	0.983934	0.951722	0.746584											2.42919	0.979532	2.65835	0.998215
												2.79585	0.980702	2.93336	1.0526	2.84169	0.980368	2.93336	0.379439	3.30003	0.47024	3.20836	0.543252	3.89586	0.120783	3.89586	0.08713	3.8042	0.166731	1.46652	0.99391	0.986719	0.959204	0.776224											2.47502	0.997509	2.70419	0.975177
												2.84169	0.994477	2.97919	0.992128	2.88752	0.999181	2.97919	0.412906	3.34586	0.491781	3.25419	0.557223	3.9417	0.120945	3.9417	0.0525776	3.85003	0.19838	1.49332	0.99504	0.989022	0.965533	0.802834											2.52085	1.00987	2.75002	0.964742
												2.88752	1.00696	3.02502	1.00676	2.93336	0.968044	3.02502	0.446061	3.39169	0.515908	3.30003	0.599707	3.98753	0.123546	3.98753	0.0905781	3.89586	0.193277	1.52013	0.995961	0.990926	0.970884	0.826593											2.56669	1.02128	2.79585	0.967617
												2.93336	1.02844	3.07086	1.00112	2.97919	0.947326	3.07086	0.420882	3.43753	0.526004	3.34586	0.573757	4.03336	0.113795	4.03336	0.0892382	3.9417	0.220324	1.54693	0.99671	0.9925	0.975407	0.847713											2.61252	1.01902	2.84169	1.00036
												2.97919	0.95031			3.02502	0.988316	3.11669	0.435025	3.48336	0.551343	3.39169	0.587373	4.0792	0.121801	4.0792	0.0720871	3.98753	0.206338	1.57374	0.997321	0.993801	0.97923	0.866418											2.65835	1.02049	2.88752	1.02335
												3.02502	1.01483			3.07086	0.979816	3.16252	0.455775	3.52919	0.568669	3.43753	0.636432	4.12503	0.118183	4.12503	0.0896491	4.03336	0.196759	1.60054	0.997818	0.994876	0.982459	0.882937											2.70419	1.01474	2.93336	0.976298
												3.07086	1.03486			3.11669	0.993939	3.20836	0.460887	3.57503	0.585036	3.48336	0.634795	4.17087	0.134619	4.17087	0.0910605	4.0792	0.216557	1.62735	0.998223	0.995765	0.985187	0.897492											2.75002	1.01207
																3.16252	1.03607	3.25419	0.477267	3.62086	0.616949	3.52919	0.643418	4.2167	0.135301	4.2167	0.113571	4.12503	0.211487	1.65415	0.998553	0.9965	0.987491	0.910291											2.79585	0.992556
																3.20836	1.00047	3.30003	0.515916	3.6667	0.620116	3.57503	0.689018	4.26253	0.129451	4.26253	0.0872551	4.17087	0.200983	1.68096	0.998822	0.997107	0.989437	0.92153											2.84169	1.02456
																3.25419	0.999733	3.34586	0.492059	3.71253	0.629518	3.62086	0.691052	4.30837	0.155465	4.30837	0.0918109	4.2167	0.210665	1.70777	0.99904	0.997609	0.99108	0.931388											2.88752	0.982887
																3.30003	1.01014	3.39169	0.558901	3.75836	0.624685	3.6667	0.675245	4.3542	0.159235	4.3542	0.0929007	4.26253	0.247224	1.73457	0.999218	0.998024	0.992468	0.940026
																3.34586	1.04674	3.43753	0.528193	3.8042	0.680309	3.71253	0.707665	4.40003	0.16046	4.40003	0.0971349	4.30837	0.232667	1.76138	0.999363	0.998367	0.99364	0.947588
																3.39169	1.00373	3.48336	0.578446	3.85003	0.681723	3.75836	0.755801	4.44587	0.171381	4.44587	0.134492	4.3542	0.234368	1.78818	0.999482	0.99865	0.99463	0.954207
																3.43753	0.983363	3.52919	0.584485	3.89586	0.681079	3.8042	0.735952	4.4917	0.160449	4.4917	0.154645	4.40003	0.248149	1.81499	0.999578	0.998884	0.995465	0.959995
																3.48336	0.978292	3.57503	0.61109	3.9417	0.728161	3.85003	0.747296	4.53754	0.181967	4.53754	0.150875	4.44587	0.25879	1.84179	0.999656	0.999078	0.996171	0.965056
																3.52919	1.01806	3.62086	0.586595	3.98753	0.712513	3.89586	0.771608	4.58337	0.182075	4.58337	0.169063	4.4917	0.275973	1.8686	0.99972	0.999238	0.996767	0.96948
																3.57503	0.995962	3.6667	0.621604	4.03336	0.763216	3.9417	0.779188	4.6292	0.190667	4.6292	0.143765	4.53754	0.283554	1.8954	0.999772	0.99937	0.99727	0.973346
																3.62086	1.01337	3.71253	0.620341	4.0792	0.781993	3.98753	0.784973	4.67504	0.182985	4.67504	0.173422	4.58337	0.276544	1.92221	0.999814	0.999479	0.997695	0.976723
																3.6667	0.990668	3.75836	0.641775	4.12503	0.783369	4.03336	0.822741	4.72087	0.173331	4.72087	0.171474	4.6292	0.288726	1.94901	0.999849	0.99957	0.998054	0.979673
																		3.8042	0.663001	4.17087	0.797086	4.0792	0.830031	4.7667	0.207742	4.7667	0.174583	4.67504	0.297083	1.97582	0.999877	0.999644	0.998356	0.982251
																		3.85003	0.693953	4.2167	0.809768	4.12503	0.854964	4.81254	0.18876	4.81254	0.183838	4.72087	0.28312	2.00262	0.9999	0.999706	0.998612	0.984501
																		3.89586	0.666038	4.26253	0.815636	4.17087	0.828592	4.85837	0.186961	4.85837	0.192985	4.7667	0.296273	2.02943	0.999918	0.999757	0.998828	0.986467
																		3.9417	0.720963	4.30837	0.83989	4.2167	0.878246	4.90421	0.200591	4.90421	0.18457	4.81254	0.322247	2.05624	0.999933	0.999799	0.999011	0.988184
																		3.98753	0.718459	4.3542	0.862995	4.26253	0.886315	4.95004	0.20888	4.95004	0.191359	4.85837	0.297826	2.08304	0.999946	0.999834	0.999165	0.989683
																		4.03336	0.727443	4.40003	0.910468	4.30837	0.893657	4.99587	0.217288	4.99587	0.187768	4.90421	0.304824	2.10985	0.999956	0.999863	0.999295	0.990992
																		4.0792	0.77081	4.44587	0.887526	4.3542	0.897394	5.04171	0.227321	5.04171	0.185481	4.95004	0.330662	2.13665	0.999964	0.999887	0.999404	0.992135
																		4.12503	0.765999	4.4917	0.921194	4.40003	0.893248	5.08754	0.221362	5.08754	0.218461	4.99587	0.350894	2.16346	0.999971	0.999906	0.999497	0.993133
																		4.17087	0.76484	4.53754	0.892044	4.44587	0.90199	5.13337	0.234732	5.13337	0.213691	5.04171	0.315682	2.19026	0.999976	0.999923	0.999575	0.994004
																		4.2167	0.801368	4.58337	0.929031	4.4917	0.917415	5.17921	0.2264	5.17921	0.224536	5.08754	0.358418	2.21707	0.999981	0.999936	0.999641	0.994765
																		4.26253	0.84921	4.6292	0.987293	4.53754	0.96242	5.22504	0.239629	5.22504	0.253157	5.13337	0.351544	2.24387	0.999984	0.999947	0.999697	0.995429
																		4.30837	0.857313	4.67504	0.964843	4.58337	0.960123	5.27087	0.237798	5.27087	0.20642	5.17921	0.372176	2.27068	0.999987	0.999956	0.999744	0.996009
																		4.3542	0.878307	4.72087	0.962143	4.6292	0.968561	5.31671	0.261168	5.31671	0.225143	5.22504	0.383319	2.29748	0.99999	0.999964	0.999784	0.996516
																		4.40003	0.894559	4.7667	0.954584	4.67504	1.00762	5.36254	0.23212	5.36254	0.256015	5.27087	0.350791	2.32429	0.999991	0.99997	0.999818	0.996958
																		4.44587	0.915924	4.81254	1.00599	4.72087	1.00992	5.40838	0.28313	5.40838	0.237167	5.31671	0.390786	2.35109	0.999993	0.999975	0.999846	0.997344
																		4.4917	0.90985	4.85837	1.01571	4.7667	0.976775	5.45421	0.275297	5.45421	0.284315	5.36254	0.393423	2.3779	0.999994	0.99998	0.99987	0.997681
																		4.53754	0.910441	4.90421	1.01097	4.81254	1.02663	5.50004	0.26833	5.50004	0.228698	5.40838	0.400525	2.4047	0.999995	0.999983	0.99989	0.997975
																		4.58337	0.945879	4.95004	0.985942	4.85837	1.01258	5.54588	0.258926	5.54588	0.241222	5.45421	0.388742	2.43151	0.999996	0.999986	0.999907	0.998232
																		4.6292	0.953739	4.99587	1.02145	4.90421	0.979535	5.59171	0.278092	5.59171	0.273881	5.50004	0.406587	2.45832	0.999997	0.999988	0.999922	0.998457
																		4.67504	0.940767	5.04171	1.0169	4.95004	1.0348	5.63754	0.260356	5.63754	0.275632	5.54588	0.429091	2.48512	0.999998	0.99999	0.999934	0.998653
																		4.72087	0.963198	5.08754	1.00416	4.99587	0.987036	5.68338	0.281169	5.68338	0.282457	5.59171	0.41579	2.51193	0.999998	0.999992	0.999944	0.998824
																		4.7667	0.985015	5.13337	1.01716	5.04171	0.9901	5.72921	0.269609	5.72921	0.322887	5.63754	0.412856	2.53873	0.999998	0.999993	0.999953	0.998973
																		4.81254	0.980691	5.17921	0.998814	5.08754	1.00459	5.77505	0.284864	5.77505	0.307272	5.68338	0.456481	2.56554	0.999999	0.999995	0.99996	0.999103
																		4.85837	0.982998	5.22504	1.00434	5.13337	0.997931	5.82088	0.305796	5.82088	0.284529	5.72921	0.436284	2.59234	0.999999	0.999996	0.999966	0.999217
																		4.90421	1.00166	5.27087	0.996845	5.17921	0.98833	5.86671	0.283867	5.86671	0.311471	5.77505	0.492766	2.61915	0.999999	0.999996	0.999972	0.999316
																		4.95004	0.978743			5.22504	1.01374	5.91255	0.301668	5.91255	0.33014	5.82088	0.44922	2.64595	0.999999	0.999997	0.999976	0.999403
																		4.99587	1.0076					5.95838	0.330272	5.95838	0.335893	5.86671	0.469691	2.67276	0.999999	0.999997	0.99998	0.999479
																		5.04171	0.996526					6.00421	0.326469	6.00421	0.367551	5.91255	0.455911	2.69956	1	0.999998	0.999983	0.999545
																		5.08754	1.0337					6.05005	0.319947	6.05005	0.355653	5.95838	0.460226	2.72637	1	0.999998	0.999986	0.999603
																		5.13337	0.998995					6.09588	0.32648	6.09588	0.34027	6.00421	0.49852	2.75317	1	0.999999	0.999988	0.999653
																		5.17921	1.00126					6.14172	0.347109	6.14172	0.347845	6.05005	0.541518	2.77998	1	0.999999	0.99999	0.999697
																		5.22504	0.984945					6.18755	0.334378	6.18755	0.346791	6.09588	0.50577	2.80679	1	0.999999	0.999991	0.999736
																		5.27087	0.991796					6.23338	0.354932	6.23338	0.3797	6.14172	0.540799	2.83359	1	0.999999	0.999993	0.999769
																		5.31671	0.99051					6.27922	0.350165	6.27922	0.404051	6.18755	0.513876	2.8604	1	0.999999	0.999994	0.999798
																		5.36254	1.01769					6.32505	0.351877	6.32505	0.374322	6.23338	0.569616	2.8872	1	0.999999	0.999995	0.999824
																								6.37088	0.36867	6.37088	0.444553	6.27922	0.542077	2.91401	1	1	0.999996	0.999846
																								6.41672	0.349406	6.41672	0.386114	6.32505	0.553894	2.94081	1	1	0.999996	0.999866
																								6.46255	0.366503	6.46255	0.452289	6.37088	0.505176	2.96762	1	1	0.999997	0.999883
																								6.50838	0.382355	6.50838	0.4383	6.41672	0.544772	2.99442	1	1	0.999997	0.999898
																								6.55422	0.376125	6.55422	0.413824	6.46255	0.559866	3.02123	1	1	0.999998	0.999911
																								6.60005	0.396602	6.60005	0.407321	6.50838	0.546108	3.04803	1	1	0.999998	0.999922
																								6.64589	0.378909	6.64589	0.392921	6.55422	0.581102	3.07484	1	1	0.999998	0.999932
																								6.69172	0.398542	6.69172	0.410465	6.60005	0.570484	3.10164	1	1	0.999999	0.999941
																								6.73755	0.404273	6.73755	0.444857	6.64589	0.543539	3.12845	1	1	0.999999	0.999948
																								6.78339	0.398292	6.78339	0.465795	6.69172	0.535113	3.15525	1	1	0.999999	0.999955
																								6.82922	0.42123	6.82922	0.456737	6.73755	0.567333	3.18206	1	1	0.999999	0.99996
																								6.87505	0.424534	6.87505	0.468636	6.78339	0.593067	3.20887	1	1	0.999999	0.999965
																								6.92089	0.440147	6.92089	0.439801	6.82922	0.588101	3.23567	1	1	0.999999	0.99997
																								6.96672	0.4141	6.96672	0.46726	6.87505	0.590304	3.26248	1	1	1	0.999974
																								7.01256	0.397816	7.01256	0.484161	6.92089	0.617889	3.28928	1	1	1	0.999977
																								7.05839	0.44746	7.05839	0.542046	6.96672	0.652803	3.31609	1	1	1	0.99998
																								7.10422	0.440624	7.10422	0.51975	7.01256	0.625904	3.34289	1	1	1	0.999982
																								7.15006	0.430071	7.15006	0.502635	7.05839	0.614338	3.3697	1	1	1	0.999985
																								7.19589	0.455424	7.19589	0.501259	7.10422	0.637938	3.3965	1	1	1	0.999987
																								7.24172	0.444708	7.24172	0.531666	7.15006	0.637595	3.42331	1	1	1	0.999988
																								7.28756	0.480647	7.28756	0.518196	7.19589	0.623438	3.45011	1	1	1	0.99999
																								7.33339	0.480008	7.33339	0.555839	7.24172	0.626726	3.47692	1	1	1	0.999991
																								7.37922	0.476725	7.37922	0.549782	7.28756	0.641409	3.50372	1	1	1	0.999992
																								7.42506	0.480344	7.42506	0.583602	7.33339	0.658477	3.53053	1	1	1	0.999993
																								7.47089	0.488145	7.47089	0.586407	7.37922	0.639468	3.55734	1	1	1	0.999994
																								7.51673	0.472196	7.51673	0.571525	7.42506	0.653225	3.58414	1	1	1	0.999995
																								7.56256	0.468956	7.56256	0.595108	7.47089	0.651775	3.61095	1	1	1	0.999995
																								7.60839	0.4703	7.60839	0.601504	7.51673	0.672955	3.63775	1	1	1	0.999996
																								7.65423	0.494927	7.65423	0.59475	7.56256	0.648088	3.66456	1	1	1	0.999997
																								7.70006	0.469477	7.70006	0.56663	7.60839	0.682248	3.69136	1	1	1	0.999997
																								7.74589	0.503649	7.74589	0.629321	7.65423	0.700391	3.71817	1	1	1	0.999997
																								7.79173	0.509478	7.79173	0.641291	7.70006	0.704227	3.74497	1	1	1	0.999998
																								7.83756	0.491969	7.83756	0.632161	7.74589	0.68975	3.77178	1	1	1	0.999998
																								7.8834	0.510063	7.8834	0.626159	7.79173	0.681312	3.79858	1	1	1	0.999998
																								7.92923	0.489109	7.92923	0.61292	7.83756	0.712699	3.82539	1	1	1	0.999998
																								7.97506	0.498914	7.97506	0.612348	7.8834	0.679771	3.85219	1	1	1	0.999999
																								8.0209	0.515871	8.0209	0.635592	7.92923	0.682009	3.879	1	1	1	0.999999
																								8.06673	0.51508	8.06673	0.692744	7.97506	0.688734	3.90581	1	1	1	0.999999
																								8.11256	0.518547	8.11256	0.673324	8.0209	0.671368	3.93261	1	1	1	0.999999
																								8.1584	0.509608	8.1584	0.659603	8.06673	0.663022	3.95942	1	1	1	0.999999
																								8.20423	0.507918	8.20423	0.661604	8.11256	0.673377	3.98622	1	1	1	0.999999
																								8.25007	0.557769	8.25007	0.665874	8.1584	0.666846	4.01303	1	1	1	0.999999
																								8.2959	0.509012	8.2959	0.684508	8.20423	0.707207	4.03983	1	1	1	0.999999
																								8.34173	0.527009	8.34173	0.670287	8.25007	0.725612	4.06664	1	1	1	1
																								8.38757	0.505729	8.38757	0.677005	8.2959	0.696714	4.09344	1	1	1	1
																								8.4334	0.54182	8.4334	0.680774	8.34173	0.738353	4.12025	1	1	1	1
																								8.47923	0.529273	8.47923	0.750093	8.38757	0.752728	4.14705	1	1	1	1
																								8.52507	0.546219	8.52507	0.741804	8.4334	0.721205	4.17386	1	1	1	1
																								8.5709	0.562893	8.5709	0.72794	8.47923	0.679223	4.20066	1	1	1	1
																								8.61673	0.550488	8.61673	0.717756	8.52507	0.718681	4.22747	1	1	1	1
																								8.66257	0.54195	8.66257	0.746788	8.5709	0.733341	4.25427	1	1	1	1
																								8.7084	0.550845	8.7084	0.806621	8.61673	0.706088	4.28108	1	1	1	1
																								8.75424	0.532751	8.75424	0.757937	8.66257	0.719857	4.30789	1	1	1	1
																								8.80007	0.579026	8.80007	0.767656	8.7084	0.756187	4.33469	1	1	1	1
																								8.8459	0.536229	8.8459	0.75481	8.75424	0.734631	4.3615	1	1	1	1
																								8.89174	0.554659	8.89174	0.820842	8.80007	0.723008	4.3883	1	1	1	1
																								8.93757	0.581594	8.93757	0.762921	8.8459	0.755685	4.41511	1	1	1	1
																								8.9834	0.543835	8.9834	0.825148	8.89174	0.721901	4.44191	1	1	1	1
																								9.02924	0.568267	9.02924	0.834849	8.93757	0.731834	4.46872	1	1	1	1
																								9.07507	0.563977	9.07507	0.808979	8.9834	0.738936	4.49552	1	1	1	1
																								9.12091	0.586676	9.12091	0.805245	9.02924	0.745592	4.52233	1	1	1	1
																								9.16674	0.53481	9.16674	0.786236	9.07507	0.728546	4.54913	1	1	1	1
																								9.21257	0.570738	9.21257	0.838869	9.12091	0.764465	4.57594	1	1	1	1
																								9.25841	0.589644	9.25841	0.859557	9.16674	0.748835	4.60274	1	1	1	1
																								9.30424	0.553554	9.30424	0.86556	9.21257	0.742338	4.62955	1	1	1	1
																								9.35007	0.600642	9.35007	0.86749	9.25841	0.778714	4.65636	1	1	1	1
																								9.39591	0.575234	9.39591	0.849481	9.30424	0.809643	4.68316	1	1	1	1
																								9.44174	0.614207	9.44174	0.869526	9.35007	0.785062	4.70997	1	1	1	1
																								9.48758	0.563446	9.48758	0.86799	9.39591	0.786398	4.73677	1	1	1	1
																								9.53341	0.579146	9.53341	0.884337	9.44174	0.782185	4.76358	1	1	1	1
																								9.57924	0.587347	9.57924	0.867722	9.48758	0.782733	4.79038	1	1	1	1
																								9.62508	0.577206	9.62508	0.884373	9.53341	0.794732	4.81719	1	1	1	1
																								9.67091	0.58465	9.67091	0.862719	9.57924	0.77788	4.84399	1	1	1	1
																								9.71674	0.596904	9.71674	0.865185	9.62508	0.80269	4.8708	1	1	1	1
																								9.76258	0.61166	9.76258	0.903739	9.67091	0.766942	4.8976	1	1	1	1
																								9.80841	0.581042	9.80841	0.880156	9.71674	0.803284	4.92441	1	1	1	1
																								9.85424	0.579741	9.85424	0.900452	9.76258	0.782493	4.95121	1	1	1	1
																								9.90008	0.586242	9.90008	0.888928	9.80841	0.833392	4.97802	1	1	1	1
																								9.94591	0.576123	9.94591	0.947993	9.85424	0.854525	5.00482	1	1	1	1
																								9.99175	0.622018	9.99175	0.946349	9.90008	0.832592	5.03163	1	1	1	1
																								10.0376	0.597294	10.0376	0.919157	9.94591	0.834739	5.05844	1	1	1	1
																								10.0834	0.615323	10.0834	0.940364	9.99175	0.84039	5.08524	1	1	1	1
																								10.1292	0.593155	10.1292	0.872671	10.0376	0.830001	5.11205	1	1	1	1
																								10.1751	0.602245	10.1751	0.906508	10.0834	0.859286	5.13885	1	1	1	1
																								10.2209	0.585581	10.2209	0.93111	10.1292	0.827614	5.16566	1	1	1	1
																								10.2667	0.578777	10.2667	0.910475	10.1751	0.86689	5.19246	1	1	1	1
																								10.3126	0.591876	10.3126	0.970968	10.2209	0.841235	5.21927	1	1	1	1
																								10.3584	0.604596	10.3584	0.9558	10.2667	0.870041	5.24607	1	1	1	1
																								10.4042	0.645107	10.4042	0.93847	10.3126	0.874859	5.27288	1	1	1	1
																								10.4501	0.614748	10.4501	0.975756	10.3584	0.864664	5.29968	1	1	1	1
																								10.4959	0.605398	10.4959	0.963339	10.4042	0.838484	5.32649	1	1	1	1
																								10.5418	0.626547	10.5418	0.975059	10.4501	0.900183	5.35329	1	1	1	1
																								10.5876	0.639148	10.5876	0.983992	10.4959	0.884496	5.3801	1	1	1	1
																								10.6334	0.638119	10.6334	0.898111	10.5418	0.90588
																								10.6793	0.639982	10.6793	0.984493	10.5876	0.932768
																								10.7251	0.638303	10.7251	0.956229	10.6334	0.927128
																								10.7709	0.631163	10.7709	0.972862	10.6793	0.928807
																								10.8168	0.618595	10.8168	1.04831	10.7251	0.92682
																								10.8626	0.622712	10.8626	0.95714	10.7709	0.922413
																								10.9084	0.658618	10.9084	1.03005	10.8168	0.933625
																								10.9543	0.645616	10.9543	1.00625	10.8626	0.903391
																								11.0001	0.670016	11.0001	0.974523	10.9084	0.936981
																								11.0459	0.650481	11.0459	0.951226	10.9543	0.931592
																								11.0918	0.675293	11.0918	0.962911	11.0001	0.938032
																								11.1376	0.669496	11.1376	0.986708	11.0459	0.941537
																								11.1834	0.677286	11.1834	0.98937	11.0918	0.963846
																								11.2293	0.670905	11.2293	1.01938	11.1376	0.914329
																								11.2751	0.691274	11.2751	1.00536	11.1834	0.940144
																								11.3209	0.67785	11.3209	0.982098	11.2293	0.950625
																								11.3668	0.69096	11.3668	0.957712	11.2751	0.970606
																								11.4126	0.698804	11.4126	0.96518	11.3209	0.936353
																								11.4584	0.675574	11.4584	1.01177	11.3668	0.998635
																								11.5043	0.753335	11.5043	0.95555	11.4126	0.94696
																								11.5501	0.73458	11.5501	1.01285	11.4584	0.996363
																								11.5959	0.718989	11.5959	1.05397	11.5043	0.96202
																								11.6418	0.734104	11.6418	0.988298	11.5501	1.0094
																								11.6876	0.744852	11.6876	1.02987	11.5959	0.952543
																								11.7334	0.70381	11.7334	1.02024	11.6418	0.957464
																								11.7793	0.727874	11.7793	0.997499	11.6876	0.976657
																								11.8251	0.80337	11.8251	0.98376	11.7334	0.990061
																								11.8709	0.784713	11.8709	0.996373	11.7793	0.954907
																								11.9168	0.801593	11.9168	0.969843	11.8251	0.951196
																								11.9626	0.788711	11.9626	1.00055	11.8709	0.988497
																								12.0084	0.808744	12.0084	0.967627	11.9168	0.958674
																								12.0543	0.832136	12.0543	1.01735	11.9626	1.01525
																								12.1001	0.82674	12.1001	0.993193	12.0084	0.98482
																								12.1459	0.809838	12.1459	1.04281	12.0543	0.977136
																								12.1918	0.832884	12.1918	0.968467	12.1001	0.985037
																								12.2376	0.80077	12.2376	1.03525	12.1459	0.983005
																								12.2834	0.82946	12.2834	1.00883	12.1918	0.992196
																								12.3293	0.832548	12.3293	0.993479	12.2376	1.03123
																								12.3751	0.823447	12.3751	1.01585	12.2834	1.01032
																								12.4209	0.858139	12.4209	1.00223	12.3293	1.01501
																								12.4668	0.847381	12.4668	1.00198	12.3751	1.02287
																								12.5126	0.797292	12.5126	1.05701	12.4209	0.99352
																								12.5584	0.814703	12.5584	1.00111	12.4668	1.02902
																								12.6043	0.840208	12.6043	1.03048	12.5126	1.03475
																								12.6501	0.84517	12.6501	1.02691	12.5584	1.0337
																								12.6959	0.826719	12.6959	0.963322	12.6043	1.00408
																								12.7418	0.819308	12.7418	0.94601	12.6501	1.01584
																								12.7876	0.858183	12.7876	0.986922	12.6959	1.00581
																								12.8334	0.854997	12.8334	1.00504	12.7418	1.00286
																								12.8793	0.821962	12.8793	1.00188	12.7876	1.01481
																								12.9251	0.832429	12.9251	0.988137	12.8334	0.997676
																								12.9709	0.842277	12.9709	0.985975	12.8793	1.03348
																								13.0168	0.878379	13.0168	1.00523	12.9251	0.986179
																								13.0626	0.852549			12.9709	0.982365
																								13.1084	0.841335			13.0168	0.964166
																								13.1543	0.867544			13.0626	0.993395
																								13.2001	0.871834			13.1084	0.972809
																								13.2459	0.85984			13.1543	1.02117
																								13.2918	0.853188			13.2001	0.988223
																								13.3376	0.854867			13.2459	0.998258
																								13.3834	0.870469			13.2918	1.00847
																								13.4293	0.863752			13.3376	0.999332
																								13.4751	0.841508			13.3834	1.02718
																								13.5209	0.869505			13.4293	1.00542
																								13.5668	0.8658			13.4751	1.00165
																								13.6126	0.878465			13.5209	0.980413
																								13.6584	0.897502			13.5668	1.00611
																								13.7043	0.883341			13.6126	0.969144
																								13.7501	0.887166			13.6584	0.980322
																								13.7959	0.875215			13.7043	0.963812
																								13.8418	0.873341			13.7501	0.983815
																								13.8876	0.883623			13.7959	0.962705
																								13.9334	0.931155			13.8418	1.01025
																								13.9793	0.889181			13.8876	0.992036
																								14.0251	0.90514			13.9334	1.01259
																								14.0709	0.909019			13.9793	0.988565
																								14.1168	0.899279			14.0251	1.01852
																								14.1626	0.886895			14.0709	0.996728
																								14.2084	0.903093			14.1168	1.00536
																								14.2543	0.908629			14.1626	1.00952
																								14.3001	0.908532			14.2084	0.990951
																								14.3459	0.904089			14.2543	1.02227
																								14.3918	0.919226			14.3001	0.998441
																								14.4376	0.900915			14.3459	0.99207
																								14.4834	0.894252
																								14.5293	0.92512
																								14.5751	0.924199
																								14.6209	0.916679
																								14.6668	0.917275
																								14.7126	0.885042
																								14.7585	0.956811
																								14.8043	0.918695
																								14.8501	0.907654
																								14.896	0.932357
																								14.9418	0.922855
																								14.9876	0.93175
																								15.0335	0.918597
																								15.0793	0.935413
																								15.1251	0.878595
																								15.171	0.901413
																								15.2168	0.898759
																								15.2626	0.944806
																								15.3085	0.955782
																								15.3543	0.955229
																								15.4001	0.968393
																								15.446	0.978416
																								15.4918	0.986303
																								15.5376	0.991612
																								15.5835	1.0049
																								15.6293	0.961893
																								15.6751	0.971124
																								15.721	0.971015
																								15.7668	0.927601
																								15.8126	0.964341
																								15.8585	0.992826
																								15.9043	0.971276
																								15.9501	0.990496
																								15.996	0.957884
																								16.0418	0.988427
																								16.0876	0.966346
																								16.1335	1.01898
																								16.1793	0.989434
																								16.2251	0.968621
																								16.271	0.98068
																								16.3168	0.993205
																								16.3626	0.997669
																								16.4085	0.980615
																								16.4543	1.00565
																								16.5001	0.956746
																								16.546	0.982858
																								16.5918	1.00373
																								16.6376	0.980225
																								16.6835	0.955392
																								16.7293	0.970864
																								16.7751	0.980149
																								16.821	0.955468
																								16.8668	0.986856
																								16.9126	1.00369
																								16.9585	0.978535
																								17.0043	1.02281
																								17.0501	0.968892
																								17.096	0.968404
																								17.1418	0.9873
																								17.1876	0.978838
																								17.2335	0.966768
																								17.2793	1.00911
																								17.3251	0.987842
																								17.371	0.957125
																								17.4168	0.999186
																								17.4626	1.01858
																								17.5085	1.01511
																								17.5543	1.00537
																								17.6001	1.00906
																								17.646	1.01056
																								17.6918	1.01997
																								17.7376	0.98925
																								17.7835	0.966032
																								17.8293	1.00321
																								17.8751	0.984125
																								17.921	1.01078
																								17.9668	1.02277
																								18.0126	1.00365
																								18.0585	0.985241
																								18.1043	1.00604
																								18.1501	0.989315
[truncated: 57 more columns]
